# Supplementary material for: Global, regional, and national burden of cardiovascular diseases in youths and young adults aged 15–39 years in 204 countries/territories, 1990–2019: a systematic analysis of Global Burden of Disease Study 2019
Source: PubMed Central journal article supplement (PMC10294522; doi:10.1186/s12916-023-02925-4), 2023-06-26
Supplement: 12916_2023_2925_MOESM1_ESM.pdf [file 12916_2023_2925_MOESM1_ESM.pdf]

**Table S1 Age-standardized incidence, prevalence, disability-adjusted life years, and death rate of the overall and type-specific cardiovascular disease in youths and young adults from 1990 to 2019 by sex, sociodemographic index, and 21 GBD regions**

|                                | Incidence                         |                                   |                                           |         | Prevalence                        |                                   |                                           |         | Disability-adjusted life years    |                                   |                                           |         | Death                             |                                   |                                           |         |
|--------------------------------|-----------------------------------|-----------------------------------|-------------------------------------------|---------|-----------------------------------|-----------------------------------|-------------------------------------------|---------|-----------------------------------|-----------------------------------|-------------------------------------------|---------|-----------------------------------|-----------------------------------|-------------------------------------------|---------|
|                                | Rate per 100,000 (95% CI) in 1990 | Rate per 100,000 (95% CI) in 2019 | Average annual percent change %, (95% CI) | P-value | Rate per 100,000 (95% CI) in 1990 | Rate per 100,000 (95% CI) in 2019 | Average annual percent change %, (95% CI) | P-value | Rate per 100,000 (95% CI) in 1990 | Rate per 100,000 (95% CI) in 2019 | Average annual percent change %, (95% CI) | P-value | Rate per 100,000 (95% CI) in 1990 | Rate per 100,000 (95% CI) in 2019 | Average annual percent change %, (95% CI) | P-value |
| <b>Cardiovascular diseases</b> |                                   |                                   |                                           |         |                                   |                                   |                                           |         |                                   |                                   |                                           |         |                                   |                                   |                                           |         |
| <b>Overall</b>                 |                                   |                                   |                                           |         |                                   |                                   |                                           |         |                                   |                                   |                                           |         |                                   |                                   |                                           |         |
| Global                         | 126.80<br>(126.65, 126.95)        | 129.85<br>(129.72, 129.98)        | 0.08<br>(0.00, 0.16)                      | 0.040   | 1477.54<br>(1477.03, 1478.06)     | 1645.32<br>(1644.86, 1645.78)     | 0.38<br>(0.35, 0.40)                      | <0.001  | 1257.51<br>(1257.03, 1257.99)     | 990.64<br>(990.28, 990.99)        | -0.81<br>(-1.03, -0.58)                   | <0.001  | 19.83<br>(19.77, 19.89)           | 15.12<br>(15.08, 15.16)           | -0.93<br>(-1.21, -0.66)                   | <0.001  |
| <b>SDI category</b>            |                                   |                                   |                                           |         |                                   |                                   |                                           |         |                                   |                                   |                                           |         |                                   |                                   |                                           |         |
| High                           | 110.05<br>(109.69, 110.41)        | 107.96<br>(107.61, 108.30)        | -0.07<br>(-0.10, -0.05)                   | <0.001  | 1168.84<br>(1167.68, 1170.00)     | 1173.12<br>(1171.99, 1174.25)     | 0.04<br>(-0.05, 0.13)                     | 0.412   | 655.71<br>(654.84, 656.58)        | 440.65<br>(439.96, 441.34)        | -1.35<br>(-1.51, -1.20)                   | <0.001  | 9.96 (9.86, 10.07)                | 6.22 (6.14, 6.30)                 | -1.62<br>(-1.79, -1.45)                   | <0.001  |
| High-middle                    | 105.89<br>(105.60, 106.18)        | 98.05<br>(97.78, 98.31)           | -0.26<br>(-0.31, -0.21)                   | <0.001  | 1101.55<br>(1100.62, 1102.49)     | 1122.92<br>(1122.01, 1123.82)     | 0.07<br>(0.05, 0.10)                      | <0.001  | 1153.93<br>(1152.97, 1154.89)     | 830.49<br>(829.73, 831.24)        | -1.10<br>(-1.60, -0.60)                   | <0.001  | 18.45<br>(18.33, 18.58)           | 12.88<br>(12.78, 12.97)           | -1.20<br>(-1.65, -0.75)                   | <0.001  |
| Middle                         | 122.99<br>(122.74, 123.25)        | 119.64<br>(119.42, 119.86)        | -0.10<br>(-0.13, -0.06)                   | <0.001  | 1498.89<br>(1497.99, 1499.79)     | 1557.15<br>(1556.35, 1557.95)     | 0.14<br>(0.11, 0.18)                      | <0.001  | 1347.68<br>(1346.81, 1348.55)     | 998.02<br>(997.39, 998.66)        | -1.01<br>(-1.24, -0.79)                   | <0.001  | 21.23<br>(21.12, 21.34)           | 15.17<br>(15.09, 15.24)           | -1.10<br>(-1.33, -0.87)                   | <0.001  |
| Low-middle                     | 145.70<br>(145.34, 146.07)        | 147.68<br>(147.40, 147.96)        | 0.04<br>(-0.04, 0.12)                     | 0.289   | 1722.74<br>(1721.48, 1724.00)     | 1855.52<br>(1854.53, 1856.51)     | 0.27<br>(0.22, 0.31)                      | <0.001  | 1617.87<br>(1616.63, 1619.11)     | 1273.45<br>(1272.62, 1274.29)     | -0.80<br>(-1.00, -0.59)                   | <0.001  | 25.90<br>(25.74, 26.05)           | 19.98<br>(19.87, 20.08)           | -0.87<br>(-1.11, -0.63)                   | <0.001  |
| Low                            | 164.85<br>(164.27, 165.44)        | 164.40<br>(164.02, 164.78)        | -0.01<br>(-0.02, 0.00)                    | 0.145   | 2238.91<br>(2236.74, 2241.08)     | 2381.39<br>(2379.92, 2382.85)     | 0.22<br>(0.12, 0.33)                      | <0.001  | 1463.49<br>(1461.69, 1465.30)     | 1158.85<br>(1157.79, 1159.91)     | -0.81<br>(-0.91, -0.71)                   | <0.001  | 22.83<br>(22.61, 23.06)           | 17.49<br>(17.36, 17.62)           | -0.92<br>(-1.03, -0.81)                   | <0.001  |

|                              | 2019          | 2020     | Change  | Significance | 2019      | 2020      | Change  | Significance | 2019      | 2020      | Change  | Significance | 2019        | 2020        | Change  | Significance |
|------------------------------|---------------|----------|---------|--------------|-----------|-----------|---------|--------------|-----------|-----------|---------|--------------|-------------|-------------|---------|--------------|
| South Asia                   | 145.75        | 145.79   | 0.00    |              | 1609.07   | 1644.64   | 0.09    |              | 1680.14   | 1347.44   | -0.73   |              | 27.08       | 21.53       | -0.76   |              |
|                              | (145.38,      | (145.52, | (-0.13, | 0.993        | (1607.84, | (1643.72, | (0.07,  | <0.001       | (1678.87, | (1346.60, | (-1.02, | <0.001       | (26.92,     | (21.42,     | (-1.09, | <0.001       |
|                              | 146.11)       | 146.06)  | 0.14)   |              | 1610.29)  | 1645.55)  | 0.12)   |              | 1681.41)  | 1348.27)  | -0.45)  |              | 27.24)      | 21.63)      | -0.44)  |              |
| East Asia                    | 108.76        | 96.11    | -0.43   |              | 1234.04   | 1143.49   | -0.26   |              | 1135.23   | 741.18    | -1.40   |              | 17.68       | 11.02       | -1.56   |              |
|                              | (108.48,      | (95.84,  | (-0.48, | <0.001       | (1233.11, | (1142.57, | (-0.29, | <0.001       | (1134.33, | (740.45,  | (-1.67, | <0.001       | (17.56,     | (10.93,     | (-1.85, | <0.001       |
|                              | 109.04)       | 96.38)   | -0.38)  |              | 1234.97)  | 1144.41)  | -0.22)  |              | 1136.13)  | 741.90)   | -1.13)  |              | 17.79)      | 11.11)      | -1.26)  |              |
| North Africa and Middle East | 130.09        | 130.78   | 0.02    |              | 1720.04   | 1767.83   | 0.11    |              | 1847.86   | 1171.09   | -1.52   |              | 29.68       | 17.83       | -1.70   |              |
|                              | (129.46,      | (130.35, | (0.00,  | 0.048        | (1717.74, | (1766.22, | (0.02,  | 0.016        | (1845.45, | (1169.79, | (-1.62, | <0.001       | (29.37,     | (17.67,     | (-1.80, | <0.001       |
|                              | 130.73)       | 131.22)  | 0.04)   |              | 1722.34)  | 1769.44)  | 0.21)   |              | 1850.28)  | 1172.40)  | -1.42)  |              | 29.99)      | 17.99)      | -1.60)  |              |
| Western                      | 148.77        | 150.34   | 0.04    |              | 2548.75   | 2727.15   | 0.24    |              | 1053.82   | 866.58    | -0.68   |              | 15.39       | 12.01       | -0.84   |              |
| Sub-Saharan Africa           | (147.85,      | (149.76, | (0.03,  | <0.001       | (2544.95, | (2724.68, | (0.20,  | <0.001       | (1051.30, | (865.14,  | (-0.82, | <0.001       | (15.08,     | (11.84,     | (-0.94, | <0.001       |
|                              | 149.70)       | 150.93)  | 0.05)   |              | 2552.55)  | 2729.63)  | 0.28)   |              | 1056.35)  | 868.03)   | -0.53)  |              | 15.70)      | 12.18)      | -0.75)  |              |
|                              | 109.68        | 107.95   | -0.05   |              | 1157.37   | 1178.45   | 0.08    |              | 1404.61   | 1182.42   | -0.54   |              | 22.24       | 18.35       | -0.60   |              |
| Southeast Asia               | (109.20,      | (107.57, | (-0.07, | <0.001       | (1155.82, | (1177.16, | (-0.01, | 0.096        | (1402.88, | (1181.14, | (-0.67, | <0.001       | (22.02,     | (18.19,     | (-0.74, | <0.001       |
|                              | 110.16)       | 108.34)  | -0.04)  |              | 1158.92)  | 1179.73)  | 0.17)   |              | 1406.34)  | 1183.70)  | -0.41)  |              | 22.46)      | 18.51)      | -0.45)  |              |
|                              | 186.31        | 179.93   | -0.12   |              | 2825.83   | 2999.50   | 0.21    |              | 1351.55   | 958.27    | -1.18   |              | 20.23       | 13.31       | -1.44   |              |
| Sub-Saharan Africa           | (185.28,      | (179.27, | (-0.13, | <0.001       | (2821.78, | (2996.80, | (0.13,  | <0.001       | (1348.64, | (956.69,  | (-1.27, | <0.001       | (19.87,     | (13.12,     | (-1.53, | <0.001       |
|                              | 187.35)       | 180.58)  | -0.11)  |              | 2829.90)  | 3002.20)  | 0.29)   |              | 1354.46)  | 959.84)   | -1.08)  |              | 20.59)      | 13.50)      | -1.34)  |              |
|                              | 104.12        | 97.68    | -0.22   |              | 1361.37   | 1380.09   | 0.05    |              | 879.74    | 613.12    | -1.22   |              | 13.74       | 9.12 (8.94, | -1.38   |              |
| Central Latin America        | (103.33,      | (97.07,  | (-0.24, | <0.001       | (1358.51, | (1377.80, | (-0.01, | 0.079        | (877.40,  | (611.59,  | (-1.61, | <0.001       | (13.45,     | 9.31)       | (-1.82, | <0.001       |
|                              | 104.92)       | 98.29)   | -0.19)  |              | 1364.23)  | 1382.39)  | 0.11)   |              | 882.10)   | 614.66)   | -0.82)  |              | 14.04)      |             | -0.94)  |              |
|                              | 162.75        | 140.39   | -0.51   |              | 2285.52   | 2213.47   | -0.09   |              | 1495.97   | 774.76    | -2.24   |              | 24.07       | 11.30       | -2.58   |              |
| Tropical Latin America       | (161.76,      | (139.61, | (-0.55, | <0.001       | (2281.77, | (2210.39, | (-0.14, | <0.001       | (1492.86, | (772.96,  | (-2.45, | <0.001       | (23.68,     | (11.09,     | (-2.83, | <0.001       |
|                              | 163.76)       | 141.18)  | -0.47)  |              | 2289.27)  | 2216.55)  | -0.04)  |              | 1499.08)  | 776.55)   | -2.04)  |              | 24.47)      | 11.52)      | -2.33)  |              |
|                              | 180.83        | 174.24   | -0.13   |              | 2811.68   | 2829.22   | 0.03    |              | 1205.66   | 922.14    | -0.95   |              | 17.95       | 13.09       | -1.11   |              |
| Sub-Saharan Africa           | (178.96,      | (173.09, | (-0.14, | <0.001       | (2804.29, | (2824.55, | (-0.02, | 0.287        | (1200.64, | (919.37,  | (-1.01, | <0.001       | (17.33,     | (12.76,     | (-1.18, | <0.001       |
|                              | 182.71)       | 175.40)  | -0.12)  |              | 2819.08)  | 2833.90)  | 0.08)   |              | 1210.69)  | 924.91)   | -0.89)  |              | 18.59)      | 13.43)      | -1.04)  |              |
|                              | 85.23 (84.75, | 78.00    | -0.31   |              | 857.13    | 820.16    | -0.14   |              | 584.53    | 275.54    | -2.62   |              | 9.06 (8.91, | 3.76 (3.66, | -3.01   |              |
| Western Europe               | 85.70)        | (77.53,  | (-0.32, | <0.001       | (855.63,  | (818.64,  | (-0.23, | 0.003        | (583.29,  | (274.67,  | (-2.79, | <0.001       | 9.22)       | 3.86)       | (-3.26, | <0.001       |
|                              |               | 78.47)   | -0.29)  |              | 858.63)   | 821.68)   | -0.05)  |              | 585.76)   | 276.41)   | -2.44)  |              |             |             | -2.76)  |              |
|                              | 138.38        | 137.53   | -0.04   |              | 1625.82   | 1597.77   | -0.04   |              | 651.65    | 539.12    | -0.63   |              | 9.64 (9.46, | 7.59 (7.44, | -0.81   |              |
| High-income North America    | (137.71,      | (136.88, | (-0.09, | 0.128        | (1623.53, | (1595.57, | (-0.27, | 0.743        | (650.20,  | (537.84,  | (-0.90, | <0.001       | 9.81)       | 7.75)       | (-1.17, | <0.001       |
|                              | 139.05)       | 138.18)  | 0.01)   |              | 1628.12)  | 1599.98)  | 0.20)   |              | 653.09)   | 540.40)   | -0.36)  |              |             |             | -0.46)  |              |

|                          | 2019                  | 2020             | 2021           | 2022   | 2019               | 2020               | 2021          | 2022   | 2019               | 2020               | 2021           | 2022   | 2019              | 2020              | 2021           | 2022   |
|--------------------------|-----------------------|------------------|----------------|--------|--------------------|--------------------|---------------|--------|--------------------|--------------------|----------------|--------|-------------------|-------------------|----------------|--------|
|                          | 151.90                | 148.22           | -0.08          |        | 1591.40            | 1636.99            | 0.11          |        | 1595.54            | 1401.24            | -0.43          |        | 25.87             | 22.50             | -0.46          |        |
| Central Asia             | (150.45, 153.37)      | (147.00, 149.45) | (-0.10, -0.06) | <0.001 | (1586.68, 1596.12) | (1632.93, 1641.06) | (0.07, 0.15)  | <0.001 | (1590.74, 1600.35) | (1397.52, 1404.97) | (-0.77, -0.09) | 0.013  | (25.26, 26.49)    | (22.03, 22.98)    | (-0.84, -0.09) | 0.017  |
|                          | 116.67                | 125.11           | 0.24           |        | 829.71             | 903.76             | 0.31          |        | 1349.16            | 1784.53            | 1.09           |        | 22.52             | 30.24             | 1.15           |        |
| Eastern Europe           | (115.96, 117.37)      | (124.31, 125.92) | (0.23, 0.26)   | <0.001 | (827.83, 831.58)   | (901.60, 905.93)   | (0.21, 0.42)  | <0.001 | (1346.80, 1351.53) | (1781.60, 1787.46) | (0.34, 1.84)   | 0.004  | (22.22, 22.83)    | (29.87, 30.62)    | (0.37, 1.94)   | 0.004  |
|                          | 185.75                | 177.02           | -0.16          |        | 2666.33            | 2651.97            | -0.01         |        | 1398.63            | 857.44             | -1.61          |        | 21.53             | 11.97             | -1.94          |        |
| Sub-Saharan Africa       | (183.91, 187.60)      | (175.60, 178.45) | (-0.18, -0.15) | <0.001 | (2659.34, 2673.33) | (2646.48, 2657.48) | (-0.04, 0.02) | 0.459  | (1393.36, 1403.92) | (854.33, 860.57)   | (-2.62, -0.59) | 0.002  | (20.87, 22.21)    | (11.61, 12.35)    | (-3.12, -0.75) | 0.001  |
|                          | 116.17                | 115.09           | -0.02          |        | 983.49             | 1012.31            | 0.11          |        | 687.08             | 275.18             | -3.12          |        | 10.56             |                   | -3.69          |        |
| High-income Asia Pacific | (115.36, 116.99)      | (114.20, 115.99) | (-0.06, 0.01)  | 0.217  | (981.14, 985.86)   | (1009.70, 1014.93) | (-0.02, 0.23) | 0.100  | (685.11, 689.06)   | (273.81, 276.55)   | (-3.39, -2.84) | <0.001 | (10.32, 10.81)    | 3.58 (3.43, 3.74) | (-3.98, -3.40) | <0.001 |
|                          | 96.64 (95.76, 97.53)  | 92.68            | -0.14          |        | 1091.07            | 1099.20            | 0.06          |        | 1200.23            | 549.89             | -2.68          |        | 19.56             | 7.98 (7.70, 8.26) | -3.08          |        |
| Central Europe           |                       | (91.71, 93.66)   | (-0.16, -0.12) | <0.001 | (1088.09, 1094.05) | (1095.82, 1102.58) | (-0.07, 0.19) | 0.392  | (1197.16, 1203.30) | (547.57, 552.22)   | (-2.93, -2.44) | <0.001 | (19.18, 19.96)    |                   | (-3.36, -2.80) | <0.001 |
|                          | 133.98                | 124.88           | -0.25          |        | 2018.18            | 2039.06            | 0.04          |        | 1245.90            | 716.07             | -1.87          |        | 19.09             | 10.09             | -2.15          |        |
| Andean Latin America     | (132.14, 135.85)      | (123.51, 126.25) | (-0.26, -0.23) | <0.001 | (2010.93, 2025.45) | (2033.54, 2044.60) | (0.01, 0.07)  | 0.010  | (1240.13, 1251.70) | (712.79, 719.36)   | (-2.31, -1.43) | <0.001 | (18.38, 19.83)    | (9.71, 10.49)     | (-2.65, -1.65) | <0.001 |
|                          | 178.78                | 188.41           | 0.18           |        | 2053.59            | 2127.73            | 0.13          |        | 1373.90            | 1175.00            | -0.50          |        | 21.97             | 18.47             | -0.57          |        |
| Caribbean                | (176.58, 181.00)      | (186.41, 190.42) | (0.17, 0.19)   | <0.001 | (2046.12, 2061.09) | (2121.01, 2134.45) | (0.08, 0.18)  | <0.001 | (1367.66, 1380.16) | (1170.01, 1180.01) | (-0.75, -0.26) | <0.001 | (21.18, 22.78)    | (17.84, 19.10)    | (-0.84, -0.30) | <0.001 |
|                          | 99.63 (98.21, 101.07) | 97.63            | -0.07          |        | 1273.18            | 1386.00            | 0.29          |        | 1006.57            | 530.71             | -2.18          |        | 15.85             | 7.50 (7.17, 7.84) | -2.54          |        |
| Southern Latin America   |                       | (96.42, 98.85)   | (-0.08, -0.06) | <0.001 | (1268.10, 1278.28) | (1381.44, 1390.57) | (0.28, 0.31)  | <0.001 | (1002.02, 1011.13) | (527.91, 533.53)   | (-2.40, -1.96) | <0.001 | (15.28, 16.43)    |                   | (-2.80, -2.27) | <0.001 |
|                          | 160.13                | 165.28           | 0.11           |        | 1598.08            | 1650.65            | 0.12          |        | 2543.41            | 2561.34            | -0.02          |        | 41.61             | 41.81             | -0.02          |        |
| Oceania                  | (155.12, 165.28)      | (161.82, 168.80) | (0.09, 0.13)   | <0.001 | (1582.24, 1614.05) | (1639.70, 1661.66) | (0.09, 0.15)  | <0.001 | (2523.00, 2563.95) | (2547.55, 2575.19) | (-0.14, 0.11)  | 0.812  | (39.01, 44.34)    | (40.06, 43.62)    | (-0.15, 0.10)  | 0.709  |
|                          | 100.31                | 99.21            | -0.05          |        | 729.55             | 753.84             | 0.11          |        | 501.61             | 278.09             | -2.02          |        | 7.70 (7.12, 8.32) | 3.90 (3.53, 4.30) | -2.32          |        |
| Australasia              | (98.18, 102.49)       | (97.29, 101.16)  | (-0.09, -0.01) | 0.017  | (723.77, 735.36)   | (748.55, 759.16)   | (0.07, 0.15)  | <0.001 | (496.81, 506.43)   | (274.89, 281.33)   | (-2.26, -1.78) | <0.001 |                   |                   | (-2.66, -1.98) | <0.001 |
| <b>Women</b>             |                       |                  |                |        |                    |                    |               |        |                    |                    |                |        |                   |                   |                |        |
|                          | 123.58                | 126.88           | 0.09           |        | 1647.49            | 1827.86            | 0.37          |        | 1073.50            | 747.66             | -1.19          |        | 16.18             | 10.46             | -1.46          |        |
| Global                   | (123.37, 123.37)      | (126.70, 126.70) | (0.05, 0.05)   | <0.001 | (1646.72, 1646.72) | (1827.17, 1827.17) | (0.32, 0.32)  | <0.001 | (1072.87, 1072.87) | (747.22, 747.22)   | (-1.37, -1.37) | <0.001 | (16.10, 16.10)    | (10.41, 10.41)    | (-1.64, -1.64) | <0.001 |

|                      | 123.79)       | 127.07)  | 0.13)   |        | 1648.27)  | 1828.55)  | 0.42)   |        | 1074.13)  | 748.10)   | -1.02)  |        | 16.25)      | 10.51)      | -1.28)  |        |
|----------------------|---------------|----------|---------|--------|-----------|-----------|---------|--------|-----------|-----------|---------|--------|-------------|-------------|---------|--------|
| <b>SDI category</b>  |               |          |         |        |           |           |         |        |           |           |         |        |             |             |         |        |
|                      | 103.22        | 103.24   | 0.01    |        | 1412.96   | 1397.86   | -0.03   |        | 484.49    | 342.08    | -1.18   |        | 6.56 (6.44, | 4.13 (4.03, | -1.58   |        |
| High                 | (102.73,      | (102.76, | (-0.04, | 0.849  | (1411.14, | (1396.08, | (-0.08, | 0.312  | (483.42,  | (341.20,  | (-1.41, | <0.001 | 6.68)       | 4.22)       | (-1.78, | <0.001 |
|                      | 103.72)       | 103.73)  | 0.05)   |        | 1414.79)  | 1399.65)  | 0.02)   |        | 485.56)   | 342.97)   | -0.94)  |        |             |             | -1.38)  |        |
|                      |               | 89.64    | -0.28   |        | 1220.52   | 1258.04   | 0.11    |        | 803.89    | 502.64    | -1.55   |        | 11.87       | 6.68 (6.58, | -1.98   |        |
| High-middle          | 97.43 (97.03, | (89.27,  | (-0.34, | <0.001 | (1219.12, | (1256.66, | (0.07,  | <0.001 | (802.75,  | (501.78,  | (-2.22, | <0.001 | (11.73,     | 6.78)       | (-2.34, | <0.001 |
|                      | 97.83)        | 90.01)   | -0.22)  |        | 1221.92)  | 1259.42)  | 0.15)   |        | 805.03)   | 503.50)   | -0.88)  |        | 12.01)      |             | -1.61)  |        |
|                      | 117.81        | 112.88   | -0.15   |        | 1618.93   | 1682.14   | 0.14    |        | 1198.50   | 713.80    | -1.72   |        | 18.25       | 9.84 (9.75, | -2.06   |        |
| Middle               | (117.46,      | (112.57, | (-0.19, | <0.001 | (1617.60, | (1680.96, | (0.12,  | <0.001 | (1197.34, | (713.04,  | (-2.04, | <0.001 | (18.10,     | 9.93)       | (-2.41, | <0.001 |
|                      | 118.17)       | 113.18)  | -0.11)  |        | 1620.27)  | 1683.32)  | 0.17)   |        | 1199.66)  | 714.56)   | -1.39)  |        | 18.39)      |             | -1.70)  |        |
|                      | 151.49        | 150.94   | -0.01   |        | 1948.11   | 2083.20   | 0.24    |        | 1504.04   | 1030.99   | -1.29   |        | 23.39       | 15.25       | -1.46   |        |
| Low-middle           | (150.96,      | (150.54, | (-0.04, | 0.577  | (1946.21, | (2081.71, | (0.17,  | <0.001 | (1502.34, | (1029.94, | (-1.51, | <0.001 | (23.18,     | (15.12,     | (-1.74, | <0.001 |
|                      | 152.01)       | 151.34)  | 0.02)   |        | 1950.01)  | 2084.69)  | 0.30)   |        | 1505.73)  | 1032.05)  | -1.07)  |        | 23.61)      | 15.38)      | -1.18)  |        |
|                      | 166.13        | 163.79   | -0.05   |        | 2443.27   | 2591.38   | 0.22    |        | 1409.16   | 987.40    | -1.21   |        | 21.54       | 14.17       | -1.43   |        |
| Low                  | (165.31,      | (163.25, | (-0.07, | <0.001 | (2440.09, | (2589.23, | (0.13,  | <0.001 | (1406.67, | (986.03,  | (-1.32, | <0.001 | (21.23,     | (14.01,     | (-1.57, | <0.001 |
|                      | 166.96)       | 164.33)  | -0.02)  |        | 2446.45)  | 2593.53)  | 0.32)   |        | 1411.65)  | 988.76)   | -1.11)  |        | 21.86)      | 14.34)      | -1.29)  |        |
| <b>21 GBD region</b> |               |          |         |        |           |           |         |        |           |           |         |        |             |             |         |        |
|                      | 156.31        | 152.78   | -0.07   |        | 1866.99   | 1891.22   | 0.05    |        | 1536.91   | 1069.95   | -1.29   |        | 23.94       | 16.11       | -1.42   |        |
| South Asia           | (155.77,      | (152.39, | (-0.14, | 0.031  | (1865.09, | (1889.82, | (0.01,  | 0.028  | (1535.18, | (1068.89, | (-1.71, | <0.001 | (23.72,     | (15.98,     | (-1.90, | <0.001 |
|                      | 156.85)       | 153.18)  | -0.01)  |        | 1868.89)  | 1892.62)  | 0.10)   |        | 1538.65)  | 1071.00)  | -0.86)  |        | 24.16)      | 16.25)      | -0.94)  |        |
|                      | 101.30        | 87.09    | -0.54   |        | 1301.25   | 1227.38   | -0.20   |        | 979.67    | 441.69    | -2.81   |        | 14.71       | 5.42 (5.33, | -3.48   |        |
| East Asia            | (100.92,      | (86.72,  | (-0.62, | <0.001 | (1299.88, | (1226.01, | (-0.23, | <0.001 | (978.47,  | (440.88,  | (-3.48, | <0.001 | (14.56,     | 5.51)       | (-4.20, | <0.001 |
|                      | 101.68)       | 87.46)   | -0.45)  |        | 1302.63)  | 1228.75)  | -0.17)  |        | 980.88)   | 442.50)   | -2.14)  |        | 14.85)      |             | -2.76)  |        |
|                      | 127.04        | 125.34   | -0.05   |        | 1828.66   | 1864.78   | 0.08    |        | 1688.07   | 1009.58   | -1.71   |        | 26.44       | 14.77       | -1.98   |        |
| North Africa and     | (126.14,      | (124.72, | (-0.06, | <0.001 | (1825.26, | (1862.38, | (0.00,  | 0.039  | (1684.78, | (1007.82, | (-1.78, | <0.001 | (26.02,     | (14.56,     | (-2.16, | <0.001 |
| Middle East          | 127.94)       | 125.96)  | -0.04)  |        | 1832.06)  | 1867.18)  | 0.16)   |        | 1691.38)  | 1011.34)  | -1.63)  |        | 26.86)      | 14.98)      | -1.79)  |        |
|                      | 143.39        | 143.71   | 0.01    |        | 2606.85   | 2805.43   | 0.26    |        | 1032.71   | 759.51    | -1.06   |        | 14.87       | 9.97 (9.75, | -1.36   |        |
| Western              | (142.12,      | (142.93, | (0.00,  | 0.008  | (2601.47, | (2801.96, | (0.24,  | <0.001 | (1029.19, | (757.65,  | (-1.17, | <0.001 | (14.44,     | 10.19)      | (-1.48, | <0.001 |
| Sub-Saharan          | 144.66)       | 144.50)  | 0.02)   |        | 2612.24)  | 2808.90)  | 0.29)   |        | 1036.24)  | 761.38)   | -0.94)  |        | 15.30)      |             | -1.25)  |        |
| Africa               | 99.99 (99.36, | 98.36    | -0.05   | <0.001 | 1233.67   | 1255.27   | 0.07    | 0.072  | 1264.31   | 871.35    | -1.26   | <0.001 | 19.43       | 12.60       | -1.46   | <0.001 |
| Southeast Asia       |               |          |         |        |           |           |         |        |           |           |         |        |             |             |         |        |

|                             | 2019          | 2020     | 2021    | 2022   | 2019      | 2020      | 2021    | 2022   | 2019      | 2020     | 2021    | 2022   | 2019        | 2020        | 2021    | 2022   |
|-----------------------------|---------------|----------|---------|--------|-----------|-----------|---------|--------|-----------|----------|---------|--------|-------------|-------------|---------|--------|
| Eastern Africa              | 100.63)       | (97.83,  | (-0.07, |        | (1231.43, | (1253.38, | (-0.01, |        | (1262.01, | (869.79, | (-1.37, |        | (19.14,     | (12.41,     | (-1.59, |        |
|                             |               | 98.89)   | -0.03)  |        | 1235.91)  | 1257.16)  | 0.15)   |        | 1266.61)  | 872.92)  | -1.15)  |        | 19.72)      | 12.79)      | -1.34)  |        |
| Eastern Africa              | 183.96        | 175.80   | -0.16   |        | 3095.89   | 3293.90   | 0.23    |        | 1247.85   | 766.48   | -1.66   |        | 18.11       | 9.61 (9.38, | -2.16   |        |
| Sub-Saharan Africa          | (182.54,      | (174.90, | (-0.18, | <0.001 | (3090.01, | (3289.97, | (0.13,  | <0.001 | (1243.96, | (764.52, | (-1.76, | <0.001 | (17.64,     | 9.83)       | (-2.26, | <0.001 |
| Africa                      | 185.38)       | 176.70)  | -0.15)  |        | 3101.78)  | 3297.85)  | 0.32)   |        | 1251.75)  | 768.44)  | -1.56)  |        | 18.60)      |             | -2.06)  |        |
| Central Latin America       | 108.30        | 96.77    | -0.39   |        | 1634.31   | 1619.72   | -0.03   |        | 815.37    | 479.55   | -1.82   |        | 12.23       | 6.43 (6.21, | -2.14   |        |
|                             | (107.18,      | (95.93,  | (-0.46, | <0.001 | (1629.94, | (1616.24, | (-0.11, | 0.583  | (812.23,  | (477.66, | (-2.37, | <0.001 | (11.84,     | 6.66)       | (-2.66, | <0.001 |
| America                     | 109.43)       | 97.63)   | -0.33)  |        | 1638.69)  | 1623.20)  | 0.06)   |        | 818.52)   | 481.45)  | -1.27)  |        | 12.63)      |             | -1.61)  |        |
| Tropical Latin America      | 162.78        | 140.45   | -0.51   |        | 2572.30   | 2520.45   | -0.06   |        | 1283.03   | 634.92   | -2.40   |        | 19.85       | 8.50 (8.24, | -2.88   |        |
|                             | (161.38,      | (139.34, | (-0.54, | <0.001 | (2566.73, | (2515.81, | (-0.14, | 0.226  | (1279.01, | (632.63, | (-2.53, | <0.001 | (19.35,     | 8.76)       | (-3.04, | <0.001 |
| America                     | 164.18)       | 141.56)  | -0.48)  |        | 2577.88)  | 2525.09)  | 0.03)   |        | 1287.06)  | 637.22)  | -2.26)  |        | 20.36)      |             | -2.72)  |        |
| Central Sub-Saharan Africa  | 176.77        | 169.91   | -0.13   |        | 3016.07   | 3059.77   | 0.07    |        | 1100.56   | 781.24   | -1.17   |        | 15.84       | 10.32       | -1.47   |        |
| Sub-Saharan Africa          | (174.19,      | (168.32, | (-0.15, | <0.001 | (3005.32, | (3052.93, | (0.01,  | 0.020  | (1093.82, | (777.66, | (-1.28, | <0.001 | (15.03,     | (9.90,      | (-1.60, | <0.001 |
| Africa                      | 179.39)       | 171.52)  | -0.11)  |        | 3026.86)  | 3066.62)  | 0.12)   |        | 1107.33)  | 784.83)  | -1.06)  |        | 16.69)      | 10.75)      | -1.33)  |        |
| Western Europe              | 74.45 (73.82, | 69.52    | -0.23   |        | 1071.60   | 1039.59   | -0.08   |        | 399.89    | 207.95   | -2.24   |        | 5.50 (5.33, | 2.27 (2.16, | -3.03   |        |
|                             | 75.08)        | (68.89,  | (-0.26, | <0.001 | (1069.21, | (1037.14, | (-0.20, | 0.199  | (398.44,  | (206.86, | (-2.41, | <0.001 | 5.67)       | 2.39)       | (-3.27, | <0.001 |
| High-income North America   |               | 70.16)   | -0.20)  |        | 1073.98)  | 1042.05)  | 0.04)   |        | 401.35)   | 209.04)  | -2.07)  |        |             |             | -2.80)  |        |
| High-income North America   | 141.01        | 143.54   | 0.06    |        | 1992.96   | 1921.78   | -0.11   |        | 493.56    | 440.22   | -0.39   |        | 6.37 (6.17, | 5.48 (5.30, | -0.48   |        |
| North America               | (140.06,      | (142.60, | (0.02,  | 0.003  | (1989.36, | (1918.36, | (-0.28, | 0.231  | (491.77,  | (438.58, | (-0.71, | 0.014  | 6.57)       | 5.66)       | (-0.80, | 0.003  |
| America                     | 141.97)       | 144.48)  | 0.10)   |        | 1996.57)  | 1925.22)  | 0.07)   |        | 495.35)   | 441.87)  | -0.08)  |        |             |             | -0.17)  |        |
| Central Asia                | 139.37        | 133.98   | -0.13   |        | 1695.01   | 1721.40   | 0.06    |        | 1220.80   | 989.46   | -0.71   |        | 18.57       | 14.73       | -0.78   |        |
|                             | (137.42,      | (132.32, | (-0.15, | <0.001 | (1688.18, | (1715.48, | (0.01,  | 0.021  | (1214.95, | (985.01, | (-1.25, | 0.011  | (17.85,     | (14.20,     | (-1.39, | 0.013  |
| Asia                        | 141.34)       | 135.64)  | -0.11)  |        | 1701.88)  | 1727.33)  | 0.12)   |        | 1226.67)  | 993.92)  | -0.16)  |        | 19.31)      | 15.29)      | -0.17)  |        |
| Eastern Europe              | 100.55        | 105.05   | 0.16    |        | 948.21    | 1029.89   | 0.32    |        | 654.03    | 838.91   | 1.00    |        | 9.53 (9.25, | 12.73       | 1.03    |        |
|                             | (99.63,       | (103.99, | (0.14,  | <0.001 | (945.36,  | (1026.57, | (0.17,  | <0.001 | (651.67,  | (836.00, | (0.26,  | 0.008  | 9.82)       | (12.38,     | (0.14,  | 0.023  |
| Europe                      | 101.49)       | 106.11)  | 0.18)   |        | 951.06)   | 1033.22)  | 0.47)   |        | 656.40)   | 841.82)  | 1.75)   |        |             | 13.08)      | 1.92)   |        |
| Southern Sub-Saharan Africa | 180.87        | 169.18   | -0.23   |        | 2858.08   | 2813.09   | -0.05   |        | 1376.41   | 686.64   | -2.27   |        | 20.58       | 8.65 (8.21, | -2.85   |        |
| Sub-Saharan Africa          | (178.36,      | (167.21, | (-0.25, | <0.001 | (2848.03, | (2805.09, | (-0.11, | 0.175  | (1369.19, | (682.71, | (-3.66, | 0.002  | (19.69,     | 9.10)       | (-4.53, | 0.001  |
| Africa                      | 183.41)       | 171.16)  | -0.21)  |        | 2868.15)  | 2821.11)  | 0.02)   |        | 1383.66)  | 690.60)  | -0.85)  |        | 21.50)      |             | -1.14)  |        |
| High-income Asia Pacific    | 103.14        | 99.37    | -0.12   |        | 1083.60   | 1090.37   | 0.05    |        | 507.02    | 193.81   | -3.29   |        | 7.19 (6.90, | 1.93 (1.77, | -4.51   |        |
|                             | (102.05,      | (98.18,  | (-0.16, | <0.001 | (1080.07, | (1086.44, | (-0.09, | 0.506  | (504.60,  | (192.14, | (-3.54, | <0.001 | 7.48)       | 2.10)       | (-4.78, | <0.001 |
| Pacific                     | 104.24)       | 100.57)  | -0.09)  |        | 1087.13)  | 1094.30)  | 0.18)   |        | 509.44)   | 195.49)  | -3.04)  |        |             |             | -4.24)  |        |
| Central Europe              | 84.87 (83.69, | 81.06    | -0.15   | <0.001 | 1292.77   | 1311.89   | 0.08    | 0.310  | 737.38    | 370.28   | -2.36   | <0.001 | 10.64       | 4.20 (3.92, | -3.18   | <0.001 |

|                      | 2019             | 2020             | 2021           | 2022           | 2023               | 2024               | 2025               | 2026         | 2027               | 2028               | 2029             | 2030           | 2031           | 2032           | 2033         | 2034           | 2035           |        |
|----------------------|------------------|------------------|----------------|----------------|--------------------|--------------------|--------------------|--------------|--------------------|--------------------|------------------|----------------|----------------|----------------|--------------|----------------|----------------|--------|
| Andean Latin America | 86.06            | (79.76, 82.38)   | (-0.18, -0.13) | <0.001         | (1288.13, 1297.42) | (1306.57, 1317.22) | (-0.08, 0.24)      | 0.005        | (733.93, 740.85)   | (367.51, 373.08)   | (-2.50, -2.23)   | <0.001         | (10.23, 11.06) | 4.51           | (6.93, 7.88) | (-3.39, -2.96) | <0.001         |        |
|                      | 135.91           | 124.43           | -0.30          |                | 2189.97            | 2214.39            | 0.04               |              | 1150.36            | 570.22             | -2.36            |                | 17.27          |                |              | -2.85          |                |        |
|                      | (133.32, 138.55) | (122.50, 126.38) | (-0.32, -0.29) | <0.001         | (2179.39, 2200.59) | (2206.24, 2222.57) | (0.01, 0.06)       | 0.005        | (1142.59, 1158.17) | (566.09, 574.38)   | (-3.14, -1.57)   | <0.001         | (16.33, 18.27) | 7.40           | (6.93, 7.88) | (-3.80, -1.90) | <0.001         |        |
|                      | 182.49           | 193.06           | 0.20           |                | 2223.42            | 2306.40            | 0.14               |              | 1393.96            | 1207.17            | -0.49            |                | 21.94          | 18.60          |              | -0.56          |                |        |
| Caribbean            | (179.39, 185.62) | (190.22, 195.93) | (0.18, 0.22)   | <0.001         | (2212.55, 2234.33) | (2296.57, 2316.26) | (0.07, 0.21)       | <0.001       | (1385.23, 1402.74) | (1200.06, 1214.31) | (-0.75, -0.22)   | <0.001         | (20.84, 23.07) | (17.73, 19.51) |              | (-0.86, -0.26) | <0.001         |        |
|                      | 92.96            | (91.04, 94.92)   | (89.50, 87.87) | (-0.13, -0.14) | <0.001             | (1449.57, 1464.88) | (1580.29, 1594.08) | (0.28, 0.32) | <0.001             | (827.36, 838.99)   | (417.83, 424.91) | (-2.56, -2.03) | <0.001         | (11.75, 13.19) | 5.26         | (4.87, 5.67)   | (-3.24, -2.55) | <0.001 |
|                      | 157.43           | 165.24           | 0.17           |                | 1681.20            | 1739.34            | 0.13               |              | 1884.19            | 1931.79            | 0.07             |                | 29.41          | 30.18          |              | 0.08           |                |        |
| Oceania              | (150.36, 164.77) | (160.34, 170.25) | (0.15, 0.19)   | <0.001         | (1657.97, 1704.69) | (1723.37, 1755.43) | (0.09, 0.16)       | <0.001       | (1859.26, 1909.39) | (1914.87, 1948.83) | (-0.09, 0.22)    | 0.388          | (26.34, 32.75) | (28.09, 32.39) |              | (-0.08, 0.24)  | 0.316          |        |
|                      | 65.88            | (63.44, 68.40)   | (65.19, 62.99) | (-0.04, -0.06) | <0.001             | (779.17, 770.71)   | (787.53, 779.86)   | (0.05, 0.00) | 0.039              | (352.48, 346.80)   | (207.87, 203.94) | (-1.80, -2.16) | <0.001         | (4.78, 5.49)   | (4.14, 4.78) | (2.37, 2.83)   | (1.97, -2.95)  | <0.001 |
| Australasia          |                  | 67.46            | -0.03          |                | 787.69             | 795.27             | 0.10               |              | 358.23             | 211.86             | -1.43            |                |                |                |              | -1.81          |                |        |
|                      | 129.92           | 132.84           | 0.07           |                | 1311.41            | 1467.09            | 0.40               |              | 1436.68            | 1229.51            | -0.55            |                | 23.39          | 19.70          |              | -0.56          |                |        |
|                      | (129.71, 130.14) | (132.66, 133.03) | (0.00, 0.14)   | 0.051          | (1310.73, 1312.09) | (1466.48, 1467.70) | (0.37, 0.43)       | <0.001       | (1435.96, 1437.41) | (1228.96, 1230.07) | (-0.71, -0.39)   | <0.001         | (23.30, 23.48) | (19.63, 19.77) |              | (-0.81, -0.30) | <0.001         |        |
| <b>SDI category</b>  |                  |                  |                |                |                    |                    |                    |              |                    |                    |                  |                |                |                |              |                |                |        |
| High                 | 116.70           | 112.36           | -0.13          |                | 932.87             | 963.56             | 0.14               |              | 822.29             | 532.61             | -1.51            |                | 13.28          |                |              | -1.68          |                |        |
|                      | (116.19, 117.22) | (111.87, 112.85) | (-0.15, -0.12) | <0.001         | (931.42, 934.32)   | (962.14, 964.98)   | (0.01, 0.28)       | 0.034        | (820.93, 823.66)   | (531.56, 533.66)   | (-1.63, -1.38)   | <0.001         | (13.11, 13.45) | 8.17           | (8.04, 8.30) | (-1.87, -1.49) | <0.001         |        |
|                      | 114.08           | 106.00           | -0.25          |                | 986.51             | 997.01             | 0.04               |              | 1492.62            | 1139.85            | -0.92            |                | 24.83          | 18.73          |              | -0.96          |                |        |
| High-middle          | (113.65, 114.50) | (105.62, 106.39) | (-0.28, -0.22) | <0.001         | (985.27, 987.75)   | (995.83, 998.19)   | (0.02, 0.07)       | <0.001       | (1491.09, 1494.15) | (1138.63, 1141.08) | (-1.31, -0.52)   | <0.001         | (24.63, 25.02) | (18.57, 18.88) |              | (-1.38, -0.53) | <0.001         |        |
|                      | 127.98           | 126.43           | -0.04          |                | 1381.88            | 1434.55            | 0.14               |              | 1491.65            | 1280.09            | -0.50            |                | 24.11          | 20.45          |              | -0.54          |                |        |
| Middle               | (127.61, 128.35) | (126.11, 126.75) | (-0.10, 0.02)  | 0.214          | (1380.67, 1383.10) | (1433.48, 1435.63) | (0.11, 0.17)       | <0.001       | (1490.37, 1492.93) | (1279.08, 1281.10) | (-0.70, -0.29)   | <0.001         | (23.95, 24.27) | (20.33, 20.58) |              | (-0.75, -0.33) | <0.001         |        |
|                      | 140.00           | 144.57           | 0.12           |                | 1501.80            | 1629.06            | 0.30               |              | 1728.66            | 1516.40            | -0.40            |                | 28.33          | 24.71          |              | -0.42          |                |        |
| Low-middle           | (139.50, 140.00) | (144.18, 144.57) | (0.09, 0.12)   | <0.001         | (1500.15, 1501.80) | (1627.74, 1629.06) | (0.24, 0.30)       | <0.001       | (1726.85, 1728.66) | (1515.12, 1516.40) | (-0.75, -0.40)   | 0.024          | (28.10, 28.33) | (24.55, 24.71) |              | (-0.81, -0.42) | 0.038          |        |

|                                 |               |          |         |        |           |           |         |        |           |           |         |        |         |         |         |        |
|---------------------------------|---------------|----------|---------|--------|-----------|-----------|---------|--------|-----------|-----------|---------|--------|---------|---------|---------|--------|
|                                 | 140.50)       | 144.96)  | 0.14)   |        | 1503.45)  | 1630.37)  | 0.36)   |        | 1730.47)  | 1517.69)  | -0.05)  | 28.57) | 24.88)  | -0.02)  |         |        |
|                                 | 163.64        | 165.19   | 0.04    |        | 2029.51   | 2165.97   | 0.23    |        | 1518.81   | 1336.23   | -0.43   | 24.15  | 20.93   | -0.48   |         |        |
| Low                             | (162.81,      | (164.64, | (0.02,  | <0.001 | (2026.57, | (2163.98, | (0.18,  | <0.001 | (1516.19, | (1334.61, | (-0.59, | <0.001 | (23.81, | (20.72, | (-0.66, | <0.001 |
|                                 | 164.48)       | 165.74)  | 0.06)   |        | 2032.45)  | 2167.96)  | 0.29)   |        | 1521.43)  | 1337.85)  | -0.27)  |        | 24.48)  | 21.14)  | -0.31)  |        |
| <b>21 GBD region</b>            |               |          |         |        |           |           |         |        |           |           |         |        |         |         |         |        |
|                                 | 135.81        | 139.18   | 0.09    |        | 1367.36   | 1407.40   | 0.13    |        | 1813.20   | 1616.42   | -0.34   |        | 30.00   | 26.77   | -0.33   |        |
| South Asia                      | (135.32,      | (138.81, | (0.05,  | <0.001 | (1365.79, | (1406.22, | (0.06,  | <0.001 | (1811.36, | (1615.13, | (-0.81, | 0.148  | (29.76, | (26.61, | (-0.84, | 0.210  |
|                                 | 136.30)       | 139.55)  | 0.13)   |        | 1368.93)  | 1408.59)  | 0.19)   |        | 1815.04)  | 1617.70)  | 0.12)   |        | 30.24)  | 26.94)  | 0.19)   |        |
|                                 | 115.75        | 104.75   | -0.35   |        | 1170.58   | 1065.04   | -0.31   |        | 1281.28   | 1027.65   | -0.74   |        | 20.46   | 16.38   | -0.74   |        |
| East Asia                       | (115.35,      | (104.36, | (-0.37, | <0.001 | (1169.32, | (1063.82, | (-0.36, | <0.001 | (1279.95, | (1026.47, | (-1.34, | 0.018  | (20.30, | (16.23, | (-1.40, | 0.029  |
|                                 | 116.15)       | 105.14)  | -0.33)  |        | 1171.85)  | 1066.27)  | -0.26)  |        | 1282.61)  | 1028.84)  | -0.13)  |        | 20.63)  | 16.53)  | -0.08)  |        |
|                                 | 132.97        | 135.69   | 0.07    |        | 1617.13   | 1679.47   | 0.15    |        | 1998.25   | 1317.86   | -1.39   |        | 32.73   | 20.61   | -1.55   |        |
| North Africa and<br>Middle East | (132.08,      | (135.07, | (0.05,  | <0.001 | (1614.02, | (1677.30, | (0.05,  | 0.005  | (1994.73, | (1315.94, | (-1.57, | <0.001 | (32.28, | (20.37, | (-1.68, | <0.001 |
|                                 | 133.87)       | 136.31)  | 0.10)   |        | 1620.24)  | 1681.65)  | 0.26)   |        | 2001.77)  | 1319.78)  | -1.21)  |        | 33.19)  | 20.85)  | -1.41)  |        |
| Western                         | 154.38        | 157.79   | 0.08    |        | 2489.43   | 2639.52   | 0.21    |        | 1077.31   | 985.70    | -0.31   |        | 15.95   | 14.28   | -0.38   |        |
| Sub-Saharan<br>Africa           | (153.04,      | (156.92, | (0.07,  | <0.001 | (2484.07, | (2635.99, | (0.17,  | <0.001 | (1073.68, | (983.46,  | (-0.42, | <0.001 | (15.50, | (14.01, | (-0.51, | <0.001 |
|                                 | 155.73)       | 158.66)  | 0.09)   |        | 2494.81)  | 2643.05)  | 0.25)   |        | 1080.96)  | 987.94)   | -0.19)  |        | 16.40)  | 14.56)  | -0.25)  |        |
|                                 | 119.58        | 117.41   | -0.06   |        | 1078.50   | 1103.34   | 0.10    |        | 1548.52   | 1488.28   | -0.10   |        | 25.12   | 24.00   | -0.15   |        |
| Southeast Asia                  | (118.87,      | (116.85, | (-0.07, | <0.001 | (1076.37, | (1101.59, | (-0.00, | 0.056  | (1545.93, | (1486.26, | (-0.47, | 0.605  | (24.79, | (23.74, | (-0.52, | 0.416  |
|                                 | 120.30)       | 117.99)  | -0.05)  |        | 1080.64)  | 1105.09)  | 0.19)   |        | 1551.11)  | 1490.31)  | 0.28)   |        | 25.46)  | 24.25)  | 0.21)   |        |
| Eastern                         | 189.02        | 184.55   | -0.08   |        | 2533.95   | 2689.46   | 0.21    |        | 1462.70   | 1162.01   | -0.78   |        | 22.50   | 17.24   | -0.91   |        |
| Sub-Saharan<br>Africa           | (187.51,      | (183.60, | (-0.10, | <0.001 | (2528.40, | (2685.78, | (0.17,  | <0.001 | (1458.34, | (1159.52, | (-0.94, | <0.001 | (21.96, | (16.93, | (-1.09, | <0.001 |
|                                 | 190.53)       | 185.51)  | -0.05)  |        | 2539.52)  | 2693.13)  | 0.25)   |        | 1467.06)  | 1164.51)  | -0.62)  |        | 23.06)  | 17.55)  | -0.74)  |        |
| Central Latin<br>America        | 99.71 (98.60, | 98.80    | -0.03   |        | 1070.67   | 1129.59   | 0.19    |        | 948.48    | 755.12    | -0.77   |        | 15.36   | 11.98   | -0.84   |        |
|                                 | 100.84)       | (97.93,  | (-0.05, | 0.003  | (1067.03, | (1126.63, | (0.15,  | <0.001 | (944.97,  | (752.68,  | (-1.18, | <0.001 | (14.91, | (11.68, | (-1.28, | <0.001 |
|                                 |               | 99.69)   | -0.01)  |        | 1074.32)  | 1132.56)  | 0.23)   |        | 952.00)   | 757.57)   | -0.36)  |        | 15.81)  | 12.29)  | -0.40)  |        |
| Tropical Latin<br>America       | 162.81        | 140.53   | -0.51   |        | 1988.60   | 1902.61   | -0.14   |        | 1718.11   | 918.38    | -2.15   |        | 28.48   | 14.18   | -2.40   |        |
|                                 | (161.39,      | (139.42, | (-0.53, | <0.001 | (1983.61, | (1898.56, | (-0.17, | <0.001 | (1713.34, | (915.60,  | (-2.34, | <0.001 | (27.86, | (13.84, | (-2.64, | <0.001 |
|                                 | 164.25)       | 141.64)  | -0.49)  |        | 1993.60)  | 1906.66)  | -0.12)  |        | 1722.89)  | 921.16)   | -1.96)  |        | 29.10)  | 14.53)  | -2.17)  |        |
| Central                         | 185.09        | 178.71   | -0.12   |        | 2603.88   | 2595.45   | -0.02   |        | 1312.97   | 1065.48   | -0.77   |        | 20.11   | 15.91   | -0.86   |        |
| Sub-Saharan<br>Africa           | (182.40,      | (177.04, | (-0.15, | <0.001 | (2593.76, | (2589.09, | (-0.04, | 0.073  | (1305.51, | (1061.26, | (-0.88, | <0.001 | (19.18, | (15.39, | (-1.00, | <0.001 |
|                                 | 187.81)       | 180.38)  | -0.09)  |        | 2614.03)  | 2601.83)  | 0.00)   |        | 1320.45)  | 1069.72)  | -0.66)  |        | 21.07)  | 16.44)  | -0.72)  |        |
| 7                               |               |          |         |        |           |           |         |        |           |           |         |        |         |         |         |        |

|                             |               |          |         |        |           |           |         |        |           |           |         |        |         |             |         |        |
|-----------------------------|---------------|----------|---------|--------|-----------|-----------|---------|--------|-----------|-----------|---------|--------|---------|-------------|---------|--------|
| Western Europe              | 95.82 (95.12, | 86.33    | -0.36   |        | 647.97    | 608.72    | -0.22   |        | 765.79    | 341.88    | -2.77   |        | 12.56   | 5.21 (5.05, | -3.02   |        |
|                             | 96.53)        | (85.64,  | (-0.38, | <0.001 | (646.14,  | (606.90,  | (-0.26, | <0.001 | (763.80,  | (340.52,  | (-3.06, | <0.001 | (12.31, | 5.38)       | (-3.33, | <0.001 |
|                             |               | 87.02)   | -0.34)  |        | 649.81)   | 610.55)   | -0.17)  |        | 767.78)   | 343.24)   | -2.47)  |        | 12.82)  |             | -2.70)  |        |
| High-income North America   | 135.82        | 131.64   | -0.11   |        | 1261.33   | 1277.30   | 0.09    |        | 810.74    | 637.92    | -0.83   |        | 12.92   | 9.71 (9.47, | -0.98   |        |
|                             | (134.89,      | (130.75, | (-0.14, | <0.001 | (1258.48, | (1274.52, | (-0.22, | 0.561  | (808.47,  | (635.96,  | (-1.05, | <0.001 | (12.64, | 9.95)       | (-1.36, | <0.001 |
|                             | 136.76)       | 132.54)  | -0.09)  |        | 1264.18)  | 1280.08)  | 0.41)   |        | 813.02)   | 639.89)   | -0.60)  |        | 13.21)  |             | -0.61)  |        |
| Central Asia                | 164.82        | 162.43   | -0.05   |        | 1486.64   | 1554.81   | 0.16    |        | 1981.18   | 1811.17   | -0.31   |        | 33.37   | 30.23       | -0.35   |        |
|                             | (162.67,      | (160.63, | (-0.07, | <0.001 | (1480.16, | (1549.24, | (0.13,  | <0.001 | (1973.53, | (1805.20, | (-0.79, | 0.203  | (32.38, | (29.46,     | (-0.77, | 0.102  |
|                             | 167.00)       | 164.24)  | -0.03)  |        | 1493.15)  | 1560.40)  | 0.18)   |        | 1988.85)  | 1817.16)  | 0.17)   |        | 34.39)  | 31.01)      | 0.07)   |        |
| Eastern Europe              | 132.86        | 145.23   | 0.31    |        | 713.01    | 781.60    | 0.33    |        | 2047.33   | 2729.57   | 1.11    |        | 35.58   | 47.77       | 1.14    |        |
|                             | (131.81,      | (144.02, | (0.30,  | <0.001 | (710.57,  | (778.82,  | (0.30,  | <0.001 | (2043.24, | (2724.49, | (0.34,  | 0.004  | (35.04, | (47.11,     | (0.36,  | 0.004  |
|                             | 133.92)       | 146.45)  | 0.32)   |        | 715.45)   | 784.39)   | 0.35)   |        | 2051.43)  | 2734.67)  | 1.88)   |        | 36.12)  | 48.45)      | 1.93)   |        |
| Southern Sub-Saharan Africa | 190.94        | 184.98   | -0.11   |        | 2459.80   | 2490.28   | 0.05    |        | 1419.50   | 1028.90   | -1.21   |        | 22.50   | 15.31       | -1.46   |        |
|                             | (188.25,      | (182.93, | (-0.13, | <0.001 | (2450.12, | (2482.73, | (0.03,  | <0.001 | (1411.81, | (1024.06, | (-1.84, | <0.001 | (21.53, | (14.72,     | (-2.19, | <0.001 |
|                             | 193.67)       | 187.05)  | -0.09)  |        | 2469.51)  | 2497.83)  | 0.07)   |        | 1427.22)  | 1033.75)  | -0.58)  |        | 23.51)  | 15.91)      | -0.72)  |        |
| High-income Asia Pacific    | 128.83        | 129.82   | 0.03    |        | 886.47    | 939.52    | 0.21    |        | 861.88    | 351.38    | -3.05   |        | 13.84   | 5.13 (4.88, | -3.38   |        |
|                             | (127.63,      | (128.51, | (0.01,  | 0.006  | (883.33,  | (936.04,  | (0.15,  | <0.001 | (858.79,  | (349.25,  | (-3.26, | <0.001 | (13.45, | 5.39)       | (-3.62, | <0.001 |
|                             | 130.03)       | 131.14)  | 0.05)   |        | 889.62)   | 943.01)   | 0.26)   |        | 864.98)   | 353.52)   | -2.83)  |        | 14.24)  |             | -3.14)  |        |
| Central Europe              | 108.15        | 103.82   | -0.14   |        | 895.64    | 896.45    | 0.02    |        | 1653.27   | 722.39    | -2.85   |        | 28.30   | 11.60       | -3.11   |        |
|                             | (106.85,      | (102.40, | (-0.17, | <0.001 | (891.87,  | (892.23,  | (-0.06, | 0.594  | (1648.23, | (718.70,  | (-3.15, | <0.001 | (27.65, | (11.14,     | (-3.42, | <0.001 |
|                             | 109.47)       | 105.27)  | -0.11)  |        | 899.43)   | 900.69)   | 0.10)   |        | 1658.32)  | 726.10)   | -2.55)  |        | 28.97)  | 12.07)      | -2.80)  |        |
| Andean Latin America        | 132.00        | 125.53   | -0.18   |        | 1838.64   | 1863.74   | 0.05    |        | 1345.42   | 862.26    | -1.52   |        | 20.99   | 12.80       | -1.70   |        |
|                             | (129.38,      | (123.60, | (-0.19, | <0.001 | (1828.76, | (1856.27, | (0.03,  | <0.001 | (1336.85, | (857.17,  | (-1.84, | <0.001 | (19.92, | (12.19,     | (-2.07, | <0.001 |
|                             | 134.67)       | 127.48)  | -0.16)  |        | 1848.55)  | 1871.22)  | 0.06)   |        | 1354.03)  | 867.37)   | -1.20)  |        | 22.10)  | 13.44)      | -1.34)  |        |
| Caribbean                   | 175.04        | 183.85   | 0.17    |        | 1875.02   | 1945.46   | 0.13    |        | 1354.07   | 1143.95   | -0.53   |        | 22.02   | 18.35       | -0.58   |        |
|                             | (171.91,      | (181.05, | (0.15,  | <0.001 | (1864.80, | (1936.34, | (0.12,  | <0.001 | (1345.16, | (1136.93, | (-0.71, | <0.001 | (20.89, | (17.47,     | (-0.76, | <0.001 |
|                             | 178.20)       | 186.68)  | 0.19)   |        | 1885.29)  | 1954.61)  | 0.15)   |        | 1363.03)  | 1150.99)  | -0.36)  |        | 23.21)  | 19.27)      | -0.39)  |        |
| Southern Latin America      | 106.50        | 105.92   | -0.02   |        | 1084.84   | 1183.18   | 0.31    |        | 1185.14   | 642.45    | -2.09   |        | 19.35   | 9.79 (9.25, | -2.34   |        |
|                             | (104.41,      | (104.14, | (-0.03, | 0.004  | (1078.17, | (1177.22, | (0.27,  | <0.001 | (1178.11, | (638.07,  | (-2.41, | <0.001 | (18.46, | 10.34)      | (-2.53, | <0.001 |
|                             | 108.62)       | 107.72)  | -0.01)  |        | 1091.54)  | 1189.17)  | 0.35)   |        | 1192.20)  | 646.85)   | -1.77)  |        | 20.27)  |             | -2.15)  |        |
| Oceania                     | 162.64        | 165.42   | 0.06    |        | 1518.76   | 1563.67   | 0.11    |        | 3168.92   | 3185.57   | -0.02   |        | 53.18   | 53.36       | -0.03   |        |
|                             | (155.58,      | (160.54, | (0.05,  | <0.001 | (1497.20, | (1548.68, | (0.08,  | <0.001 | (3137.00, | (3163.84, | (-0.14, | 0.713  | (49.08, | (50.57,     | (-0.14, | 0.635  |
|                             | 169.96)       | 170.41)  | 0.06)   |        | 1540.56)  | 1578.78)  | 0.13)   |        | 3201.10)  | 3207.42)  | 0.09)   |        | 57.54)  | 56.27)      | 0.09)   |        |



|                                |               |          |         |        |               |           |         |        |               |               |         |        |              |             |         |        |
|--------------------------------|---------------|----------|---------|--------|---------------|-----------|---------|--------|---------------|---------------|---------|--------|--------------|-------------|---------|--------|
|                                | 134.99        | 133.96   | -0.03   |        | 680.88        | 721.75    | 0.20    |        | 651.78        | 350.21        | -2.12   |        | 10.65 (9.68, | 5.47 (4.86, | -2.27   |        |
| Australasia                    | (131.49,      | (130.80, | (-0.08, | 0.228  | (673.01,      | (714.46,  | (0.13,  | <0.001 | (644.06,      | (345.13,      | (-2.47, | <0.001 | 11.68)       | 6.15)       | (-2.66, | <0.001 |
|                                | 138.57)       | 137.17)  | 0.02)   |        | 688.83)       | 729.11)   | 0.27)   |        | 659.56)       | 355.36)       | -1.78)  |        |              |             | -1.89)  |        |
| <b>Rheumatic heart disease</b> |               |          |         |        |               |           |         |        |               |               |         |        |              |             |         |        |
| <b>Overall</b>                 |               |          |         |        |               |           |         |        |               |               |         |        |              |             |         |        |
|                                | 41.81 (41.73, | 50.37    | 0.65    |        | 637.47        | 765.19    | 0.64    |        | 190.36        | 116.18        | -1.69   |        | 2.68 (2.66,  | 1.32 (1.31, | -2.42   |        |
| Global                         | 41.90)        | (50.29,  | (0.61,  | <0.001 | (637.14,      | (764.87,  | (0.60,  | <0.001 | (190.18,      | (116.06,      | (-1.85, | <0.001 | 2.71)        | 1.34)       | (-2.65, | <0.001 |
|                                |               | 50.45)   | 0.68)   |        | 637.81)       | 765.50)   | 0.68)   |        | 190.54)       | 116.31)       | -1.52)  |        |              |             | -2.19)  |        |
| <b>SDI category</b>            |               |          |         |        |               |           |         |        |               |               |         |        |              |             |         |        |
|                                | 1.34 (1.30,   | 1.35     | 0.04    |        | 20.67 (20.52, | 24.52     | 0.60    |        | 17.05 (16.91, | 6.96 (6.87,   | -2.97   |        | 0.27 (0.25,  | 0.10 (0.09, | -3.49   |        |
| High                           | 1.38)         | (1.31,   | (-0.13, | 0.636  | 20.83)        | (24.35,   | (0.35,  | <0.001 | 17.20)        | 7.05)         | (-3.34, | <0.001 | 0.29)        | 0.11)       | (-3.88, | <0.001 |
|                                |               | 1.39)    | 0.22)   |        |               | 24.68)    | 0.86)   |        |               |               | -2.60)  |        |              |             | -3.11)  |        |
|                                | 18.55 (18.43, | 19.03    | 0.09    |        | 313.25        | 327.11    | 0.16    |        | 94.91 (94.64, | 35.58 (35.42, | -3.31   |        | 1.36 (1.33,  | 0.33 (0.32, | -4.68   |        |
| High-middle                    | 18.68)        | (18.90,  | (0.05,  | <0.001 | (312.75,      | (326.61,  | (0.11,  | <0.001 | 95.18)        | 35.74)        | (-3.65, | <0.001 | 1.40)        | 0.35)       | (-5.21, | <0.001 |
|                                |               | 19.15)   | 0.14)   |        | 313.75)       | 327.61)   | 0.20)   |        |               |               | -2.96)  |        |              |             | -4.15)  |        |
|                                | 42.94 (42.79, | 43.24    | 0.03    |        | 735.18        | 727.91    | -0.03   |        | 190.66        | 85.34 (85.15, | -2.73   |        | 2.64 (2.60,  | 0.84 (0.82, | -3.84   |        |
| Middle                         | 43.09)        | (43.10,  | (-0.05, | 0.520  | (734.55,      | (727.36,  | (-0.05, | 0.015  | (190.34,      | 85.53)        | (-3.06, | <0.001 | 2.68)        | 0.86)       | (-4.30, | <0.001 |
|                                |               | 43.37)   | 0.11)   |        | 735.80)       | 728.45)   | -0.01)  |        | 190.98)       |               | -2.40)  |        |              |             | -3.38)  |        |
|                                | 71.91 (71.66, | 74.00    | 0.10    |        | 1004.28       | 1070.64   | 0.24    |        | 367.82        | 213.52        | -1.85   |        | 5.37 (5.30,  | 2.73 (2.69, | -2.31   |        |
| Low-middle                     | 72.16)        | (73.80,  | (0.02,  | 0.016  | (1003.33,     | (1069.89, | (0.18,  | <0.001 | (367.24,      | (213.19,      | (-2.07, | <0.001 | 5.44)        | 2.77)       | (-2.58, | <0.001 |
|                                |               | 74.19)   | 0.18)   |        | 1005.23)      | 1071.40)  | 0.30)   |        | 368.40)       | 213.86)       | -1.63)  |        |              |             | -2.04)  |        |
|                                | 87.55 (87.14, | 90.01    | 0.11    |        | 1319.96       | 1403.41   | 0.22    |        | 339.17        | 204.51        | -1.74   |        | 4.63 (4.53,  | 2.32 (2.27, | -2.36   |        |
| Low                            | 87.97)        | (89.74,  | (0.08,  | <0.001 | (1318.31,     | (1402.29, | (0.18,  | <0.001 | (338.33,      | (204.08,      | (-1.90, | <0.001 | 4.73)        | 2.36)       | (-2.56, | <0.001 |
|                                |               | 90.28)   | 0.13)   |        | 1321.61)      | 1404.53)  | 0.25)   |        | 340.02)       | 204.94)       | -1.58)  |        |              |             | -2.16)  |        |
| <b>21 GBD region</b>           |               |          |         |        |               |           |         |        |               |               |         |        |              |             |         |        |
|                                | 76.62 (76.36, | 75.07    | -0.08   |        | 988.15        | 1011.88   | 0.11    |        | 475.23        | 275.71        | -1.89   |        | 7.16 (7.07,  | 3.83 (3.78, | -2.15   |        |
| South Asia                     | 76.88)        | (74.88,  | (-0.22, | 0.283  | (987.19,      | (1011.16, | (0.04,  | 0.001  | (474.57,      | (275.34,      | (-2.17, | <0.001 | 7.24)        | 3.87)       | (-2.43, | <0.001 |
|                                |               | 75.26)   | 0.07)   |        | 989.10)       | 1012.59)  | 0.18)   |        | 475.90)       | 276.09)       | -1.61)  |        |              |             | -1.87)  |        |
|                                | 33.74 (33.59, | 28.48    | -0.59   |        | 615.21        | 507.75    | -0.66   |        | 167.68        | 42.60 (42.42, | -4.63   |        | 2.38 (2.34,  | 0.31 (0.29, | -6.77   |        |
| East Asia                      | 33.89)        | (28.32,  | (-0.63, | <0.001 | (614.56,      | (507.12,  | (-0.69, | <0.001 | (167.34,      | 42.78)        | (-5.01, | <0.001 | 2.42)        | 0.32)       | (-7.35, | <0.001 |
|                                |               | 28.63)   | -0.54)  |        | 615.86)       | 508.38)   | -0.63)  |        | 168.02)       |               | -4.25)  |        |              |             | -6.19)  |        |

|                              |                         |                         |                      |        |                            |                            |                      |        |                         |                         |                      |        |                   |                   |                      |        |
|------------------------------|-------------------------|-------------------------|----------------------|--------|----------------------------|----------------------------|----------------------|--------|-------------------------|-------------------------|----------------------|--------|-------------------|-------------------|----------------------|--------|
| North Africa and Middle East | 33.12 (32.82, 33.43)    | 35.58 (35.35, 35.81)    | 0.25 (0.23, 0.26)    | <0.001 | 521.68 (520.44, 522.93)    | 555.06 (554.16, 555.97)    | 0.22 (0.18, 0.27)    | <0.001 | 114.76 (114.17, 115.34) | 54.42 (54.14, 54.71)    | -2.52 (-2.62, -2.42) | <0.001 | 1.49 (1.42, 1.56) | 0.46 (0.44, 0.49) | -3.94 (-4.08, -3.79) | <0.001 |
| Western Sub-Saharan Africa   | 75.09 (74.46, 75.73)    | 77.85 (77.45, 78.26)    | 0.12 (0.10, 0.14)    | <0.001 | 1219.46 (1216.84, 1222.08) | 1285.81 (1284.12, 1287.51) | 0.18 (0.17, 0.20)    | <0.001 | 139.08 (138.20, 139.96) | 91.96 (91.50, 92.41)    | -1.42 (-1.49, -1.36) | <0.001 | 1.32 (1.23, 1.41) | 0.50 (0.47, 0.53) | -3.30 (-3.47, -3.12) | <0.001 |
| Southeast Asia               | 23.77 (23.56, 23.99)    | 23.21 (23.03, 23.39)    | -0.09 (-0.13, -0.04) | <0.001 | 361.15 (360.30, 362.01)    | 375.13 (374.41, 375.86)    | 0.12 (0.07, 0.17)    | <0.001 | 115.03 (114.55, 115.52) | 65.88 (65.58, 66.19)    | -1.88 (-2.03, -1.73) | <0.001 | 1.64 (1.59, 1.70) | 0.79 (0.75, 0.82) | -2.45 (-2.66, -2.25) | <0.001 |
| Eastern Sub-Saharan Africa   | 108.32 (107.56, 109.07) | 111.34 (110.84, 111.83) | 0.10 (0.09, 0.11)    | <0.001 | 1752.35 (1749.18, 1755.52) | 1885.50 (1883.38, 1887.62) | 0.26 (0.22, 0.29)    | <0.001 | 197.74 (196.69, 198.79) | 134.83 (134.26, 135.39) | -1.31 (-1.40, -1.22) | <0.001 | 1.84 (1.74, 1.95) | 0.72 (0.68, 0.76) | -3.18 (-3.38, -2.98) | <0.001 |
| Central Latin America        | 28.33 (27.94, 28.73)    | 29.61 (29.27, 29.94)    | 0.15 (0.10, 0.20)    | <0.001 | 494.83 (493.13, 496.53)    | 515.22 (513.82, 516.62)    | 0.14 (0.11, 0.18)    | <0.001 | 83.06 (82.35, 83.77)    | 34.64 (34.28, 35.01)    | -2.94 (-3.14, -2.75) | <0.001 | 1.02 (0.94, 1.10) | 0.17 (0.15, 0.20) | -5.90 (-6.18, -5.62) | <0.001 |
| Tropical Latin America       | 74.40 (73.74, 75.06)    | 74.11 (73.53, 74.68)    | -0.01 (-0.02, 0.00)  | 0.039  | 1356.55 (1353.68, 1359.42) | 1374.14 (1371.71, 1376.58) | 0.04 (0.04, 0.05)    | <0.001 | 151.71 (150.75, 152.68) | 90.13 (89.51, 90.76)    | -1.78 (-1.89, -1.67) | <0.001 | 1.45 (1.36, 1.55) | 0.42 (0.38, 0.46) | -4.18 (-4.51, -3.86) | <0.001 |
| Central Sub-Saharan Africa   | 102.91 (101.56, 104.28) | 104.93 (104.06, 105.80) | 0.07 (0.05, 0.08)    | <0.001 | 1845.48 (1839.54, 1851.43) | 1872.85 (1869.07, 1876.63) | 0.05 (0.03, 0.07)    | <0.001 | 193.04 (191.11, 194.98) | 135.23 (134.21, 136.25) | -1.25 (-1.29, -1.21) | <0.001 | 1.75 (1.56, 1.94) | 0.77 (0.69, 0.85) | -2.80 (-2.93, -2.68) | <0.001 |
| Western Europe               | 0.64 (0.60, 0.68)       | 0.39 (0.36, 0.43)       | -1.71 (-1.94, -1.48) | <0.001 | 9.67 (9.51, 9.83)          | 7.29 (7.14, 7.44)          | -1.00 (-1.18, -0.81) | <0.001 | 13.98 (13.79, 14.17)    | 4.70 (4.58, 4.81)       | -3.75 (-4.00, -3.51) | <0.001 | 0.23 (0.21, 0.25) | 0.07 (0.06, 0.09) | -4.04 (-4.67, -3.40) | <0.001 |
| High-income North America    | 1.91 (1.84, 1.99)       | 1.32 (1.25, 1.38)       | -1.26 (-1.34, -1.19) | <0.001 | 29.28 (28.97, 29.59)       | 21.74 (21.48, 22.00)       | -1.01 (-1.05, -0.96) | <0.001 | 16.34 (16.11, 16.57)    | 6.45 (6.31, 6.59)       | -3.13 (-3.55, -2.70) | <0.001 | 0.25 (0.23, 0.28) | 0.09 (0.07, 0.11) | -3.54 (-4.51, -2.57) | <0.001 |
| Central Asia                 | 48.82 (48.02, 49.63)    | 51.62 (50.89, 52.36)    | 0.19 (0.18, 0.21)    | <0.001 | 833.56 (830.19, 836.94)    | 905.61 (902.57, 908.65)    | 0.29 (0.28, 0.29)    | <0.001 | 313.67 (311.58, 315.77) | 140.78 (139.59, 141.97) | -2.69 (-3.36, -2.01) | <0.001 | 4.64 (4.38, 4.90) | 1.65 (1.52, 1.78) | -3.47 (-4.23, -2.70) | <0.001 |
| Eastern Europe               | 5.77 (5.62, 5.93)       | 3.18 (3.06, 3.32)       | -2.03 (-2.22, -1.84) | <0.001 | 45.44 (45.00, 45.89)       | 34.01 (33.58, 34.45)       | -0.97 (-1.06, -0.87) | <0.001 | 76.30 (75.73, 76.87)    | 16.60 (16.30, 16.90)    | -4.98 (-6.11, -3.83) | <0.001 | 1.29 (1.22, 1.37) | 0.26 (0.22, 0.30) | -5.22 (-6.43, -3.99) | <0.001 |

|                     |               |         |         |        |               |             |         |        |               |               |         |        |              |             |         |        |
|---------------------|---------------|---------|---------|--------|---------------|-------------|---------|--------|---------------|---------------|---------|--------|--------------|-------------|---------|--------|
| Southern            |               | 99.25   | 0.03    |        | 1681.78       | 1707.54     | 0.05    |        | 243.16        | 159.77        | -1.43   |        |              |             |         |        |
| Sub-Saharan         | 98.39 (97.10, | (98.18, | (0.02,  | <0.001 | (1676.28,     | (1703.13,   | (0.04,  | <0.001 | (241.06,      | (158.42,      | (-1.89, | <0.001 | 2.72 (2.49,  | 1.27 (1.15, | (-3.38, | <0.001 |
| Africa              | 99.69)        | 100.32) | 0.04)   |        | 1687.30)      | 1711.96)    | 0.07)   |        | 245.29)       | 161.12)       | (-0.97) |        | 2.95)        | 1.40)       | (-1.76) |        |
| High-income Asia    | 0.59 (0.53,   | 0.29    | -2.43   |        | 13.16 (12.89, | 9.57 (9.30, | -1.11   |        | 11.17 (10.92, | 3.22 (3.07,   | -4.19   |        | 0.18 (0.15,  | 0.04 (0.03, | (-4.86  |        |
| Pacific             | 0.65)         | (0.25,  | (-2.71, | <0.001 | 13.44)        | 9.84)       | (-1.20, | <0.001 | 11.42)        | 3.37)         | (-4.49, | <0.001 | 0.21)        | 0.07)       | (-5.17, | <0.001 |
|                     |               | 0.34)   | -2.16)  |        |               |             | -1.02)  |        |               |               | -3.90)  |        | 0.21)        | 0.07)       | (-4.54) |        |
|                     |               | 2.86    | -1.24   |        |               |             | -0.63   |        |               |               | -6.15   |        |              |             | (-6.78  |        |
| Central Europe      | 4.11 (3.93,   | (2.68,  | (-1.40, | <0.001 | 49.28 (48.64, | 41.19       | (-0.75, | <0.001 | 71.26 (70.50, | 11.43 (11.09, | (-6.45, | <0.001 | 1.21 (1.11,  | 0.16 (0.12, | (-7.07, | <0.001 |
|                     | 4.30)         | 3.04)   | -1.09)  |        | 49.92)        | (40.52,     | (-0.75, | <0.001 | 72.01)        | 11.79)        | (-6.45, | <0.001 | 1.31)        | 0.21)       | (-7.07, | <0.001 |
|                     |               | 3.04)   | -1.09)  |        |               | 41.88)      | -0.52)  |        |               |               | -5.85)  |        | 1.31)        | 0.21)       | (-6.50) |        |
| Andean Latin        | 66.20 (64.95, | 65.88   | -0.02   |        | 1170.32       | 1187.99     | 0.05    |        | 117.11        |               | -1.58   |        | 1.03 (0.87,  | 0.29 (0.23, | (-4.27  |        |
| America             | 67.48)        | (64.90, | (-0.04, | 0.002  | (1164.84,     | (1183.77,   | (0.03,  | <0.001 | (115.36,      | 73.96 (72.91, | (-1.73, | <0.001 | 1.21)        | 0.36)       | (-4.90, | <0.001 |
|                     |               | 66.88)  | -0.01)  |        | 1175.83)      | 1192.21)    | 0.07)   |        | 118.87)       | 75.02)        | (-1.43) |        | 1.21)        | 0.36)       | (-3.63) |        |
|                     |               | 68.30   | 0.28    |        | 1115.48       | 1175.23     | 0.18    |        | 246.92        | 163.39        | -1.37   |        | 3.26 (2.96,  | 1.80 (1.61, | (-1.97  |        |
| Caribbean           | 62.97 (61.72, | (67.11, | (0.26,  | <0.001 | (1110.04,     | (1170.25,   | (0.17,  | <0.001 | (244.34,      | (161.53,      | (-1.55, | <0.001 | 3.57)        | 2.01)       | (-2.22, | <0.001 |
|                     | 64.25)        | 69.52)  | 0.31)   |        | 1120.93)      | 1180.23)    | 0.19)   |        | 249.53)       | 165.26)       | (-1.19) |        | 3.57)        | 2.01)       | (-1.72) |        |
|                     |               | 35.67   | 0.22    |        | 634.17        | 690.28      | 0.29    |        | 79.42 (78.15, | 43.86 (43.05, | -2.03   |        | 0.84 (0.72,  | 0.19 (0.14, | (-5.00  |        |
| Southern Latin      | 33.49 (32.68, | (34.93, | (0.20,  | <0.001 | (630.60,      | (687.05,    | (0.28,  | <0.001 | 80.70)        | 44.68)        | (-2.13, | <0.001 | 0.98)        | 0.25)       | (-5.29, | <0.001 |
| America             | 34.32)        | 36.42)  | 0.24)   |        | 637.77)       | 693.51)     | 0.31)   |        |               |               | (-1.93) |        | 0.98)        | 0.25)       | (-4.72) |        |
|                     |               | 43.75   | 0.21    |        | 710.41        | 770.48      | 0.28    |        | 674.23        | 610.07        | -0.36   |        | 10.74 (9.48, | 9.56 (8.75, | (-0.42  |        |
| Oceania             | 41.16 (38.71, | (42.00, | (0.20,  | <0.001 | (700.13,      | (763.10,    | (0.24,  | <0.001 | (664.04,      | (603.46,      | (-0.53, | <0.001 | 12.14)       | 10.44)      | (-0.59, | <0.001 |
|                     | 43.72)        | 45.55)  | 0.23)   |        | 720.81)       | 777.92)     | 0.33)   |        | 684.55)       | 616.75)       | (-0.20) |        | 12.14)       | 10.44)      | (-0.25) |        |
|                     |               | 0.94    | -0.84   |        | 24.58 (23.51, | 23.22       | -0.19   |        | 28.66 (27.52, | 12.47 (11.79, | -2.79   |        | 0.46 (0.32,  | 0.19 (0.12, | (-2.92  |        |
| Australasia         | 1.20 (0.97,   | (0.76,  | (-0.98, | <0.001 | 25.68)        | (22.28,     | (-0.21, | <0.001 | 29.84)        | 13.19)        | (-3.12, | <0.001 | 0.63)        | 0.30)       | (-3.50, | <0.001 |
|                     | 1.46)         | 1.15)   | -0.70)  |        |               | 24.21)      | -0.17)  |        |               |               | (-2.46) |        | 0.63)        | 0.30)       | (-2.33) |        |
| <b>Women</b>        |               |         |         |        |               |             |         |        |               |               |         |        |              |             |         |        |
|                     |               | 55.68   | 0.68    |        | 704.89        | 854.09      | 0.67    |        | 208.13        | 119.84        | -1.89   |        | 2.94 (2.91,  | 1.32 (1.31, | (-2.72  |        |
| Global              | 45.76 (45.64, | (55.56, | (0.62,  | <0.001 | (704.38,      | (853.62,    | (0.64,  | <0.001 | (207.85,      | (119.66,      | (-2.10, | <0.001 | 2.98)        | 1.34)       | (-3.00, | <0.001 |
|                     | 45.89)        | 55.80)  | 0.73)   |        | 705.39)       | 854.56)     | 0.70)   |        | 208.40)       | 120.02)       | (-1.67) |        | 2.98)        | 1.34)       | (-2.44) |        |
| <b>SDI category</b> |               |         |         |        |               |             |         |        |               |               |         |        |              |             |         |        |
|                     |               | 1.42    | -0.24   |        | 22.44 (22.21, | 23.54       | 0.17    |        | 18.09 (17.88, | 6.93 (6.81,   | -3.22   |        | 0.29 (0.26,  | 0.10 (0.08, | (-3.57  |        |
| High                | 1.52 (1.46,   | (1.36,  | (-0.29, | <0.001 | 22.67)        | (23.31,     | (0.13,  | <0.001 | 18.29)        | 7.06)         | (-3.53, | <0.001 | 0.31)        | 0.11)       | (-3.98, | <0.001 |
|                     | 1.59)         | 1.48)   | -0.19)  |        |               | 23.78)      | 0.22)   |        |               |               | (-2.92) |        | 0.31)        | 0.11)       | (-3.15) |        |

|                              |               |          |         |        |           |           |         |        |                |               |         |        |             |             |         |        |
|------------------------------|---------------|----------|---------|--------|-----------|-----------|---------|--------|----------------|---------------|---------|--------|-------------|-------------|---------|--------|
| High-middle                  | 19.10 (18.92, | 20.28    | 0.21    |        | 338.83    | 366.42    | 0.28    |        | 99.41 (99.01,  | 35.23 (35.00, | -3.51   |        | 1.43 (1.38, | 0.30 (0.28, | -5.23   |        |
|                              | 19.27)        | (20.09,  | (0.16,  | <0.001 | (338.09,  | (365.66,  | (0.24,  | <0.001 | 99.81)         | 35.47)        | (-3.85, | <0.001 | 1.47)       | 0.32)       | (-5.79, | <0.001 |
| Middle                       | 44.87 (44.65, | 45.78    | 0.06    |        | 792.11    | 796.45    | 0.02    |        | 220.35         | 86.34 (86.07, | -3.16   |        | 3.12 (3.06, | 0.81 (0.78, | -4.51   |        |
|                              | 45.08)        | (45.59,  | (-0.04, | 0.219  | (791.19,  | (795.63,  | (0.00,  | 0.052  | (219.86,       | 86.60)        | (-3.65, | <0.001 | 3.18)       | 0.83)       | (-5.03, | <0.001 |
| Low-middle                   | 83.02 (82.64, | 84.24    | 0.06    |        | 1160.57   | 1223.18   | 0.19    |        | 388.04         | 221.42        | -1.94   |        | 5.60 (5.49, | 2.76 (2.71, | -2.41   |        |
|                              | 83.39)        | (83.94,  | (0.03,  | <0.001 | (1159.12, | (1222.04, | (0.18,  | <0.001 | (387.19,       | (220.93,      | (-2.20, | <0.001 | 5.70)       | 2.81)       | (-2.70, | <0.001 |
| Low                          | 94.39 (93.79, | 96.98    | 0.10    |        | 1422.29   | 1510.56   | 0.21    |        | 366.56         | 210.62        | -1.92   |        | 5.04 (4.90, | 2.37 (2.30, | -2.61   |        |
|                              | 94.99)        | (96.58,  | (0.09,  | <0.001 | (1419.88, | (1508.93, | (0.17,  | <0.001 | (365.32,       | (210.00,      | (-2.17, | <0.001 | 5.19)       | 2.44)       | (-2.92, | <0.001 |
|                              |               | 97.38)   | 0.11)   |        | 1424.70)  | 1512.19)  | 0.25)   |        | 367.80)        | 211.24)       | -1.67)  |        |             |             | -2.29)  |        |
| <b>21 GBD region</b>         |               |          |         |        |           |           |         |        |                |               |         |        |             |             |         |        |
| South Asia                   | 91.34 (90.94, | 87.77    | -0.13   |        | 1171.89   | 1182.97   | 0.04    |        | 490.65         | 279.57        | -1.98   |        | 7.28 (7.16, | 3.78 (3.72, | -2.30   |        |
|                              | 91.75)        | (87.47,  | (-0.19, | <0.001 | (1170.39, | (1181.87, | (0.02,  | <0.001 | (489.68,       | (279.03,      | (-2.39, | <0.001 | 7.40)       | 3.84)       | (-2.77, | <0.001 |
| East Asia                    | 34.01 (33.79, | 29.08    | -0.55   |        | 644.53    | 544.02    | -0.58   |        | 210.94         | 43.57 (43.30, | -5.30   |        | 3.13 (3.06, | 0.29 (0.27, | -7.86   |        |
|                              | 34.22)        | (28.85,  | (-0.59, | <0.001 | (643.58,  | (543.08,  | (-0.62, | <0.001 | (210.38,       | 43.83)        | (-5.97, | <0.001 | 3.20)       | 0.31)       | (-8.94, | <0.001 |
| North Africa and Middle East | 34.08 (33.64, | 36.74    | 0.26    |        | 555.73    | 595.68    | 0.24    |        | 144.64         | 62.34 (61.90, | -2.85   |        | 1.96 (1.85, | 0.57 (0.53, | -4.16   |        |
|                              | 34.53)        | (36.40,  | (0.24,  | <0.001 | (553.89,  | (594.33,  | (0.22,  | <0.001 | (143.70,       | 62.78)        | (-2.94, | <0.001 | 2.08)       | 0.61)       | (-4.33, | <0.001 |
| Western Sub-Saharan Africa   | 76.90 (76.01, | 80.43    | 0.16    |        | 1246.67   | 1328.86   | 0.22    |        | 158.81         | 95.91 (95.27, | -1.72   |        | 1.62 (1.49, | 0.54 (0.49, | -3.74   |        |
|                              | 77.79)        | (79.87,  | (0.14,  | <0.001 | (1242.98, | (1326.48, | (0.22,  | <0.001 | (157.50,       | 96.55)        | (-1.77, | <0.001 | 1.76)       | 0.59)       | (-3.92, | <0.001 |
| Southeast Asia               | 27.10 (26.78, | 26.36    | -0.10   |        | 426.13    | 442.27    | 0.13    |        | 119.05         | 73.22 (72.76, | -1.63   |        | 1.66 (1.57, | 0.86 (0.81, | -2.20   |        |
|                              | 27.42)        | (26.09,  | (-0.14, | <0.001 | (424.83,  | (441.15,  | (0.10,  | <0.001 | (118.36,       | 73.67)        | (-1.82, | <0.001 | 1.74)       | 0.91)       | (-2.48, | <0.001 |
| Eastern Sub-Saharan Africa   | 114.09        | 118.70   | 0.13    |        | 1861.25   | 2014.08   | 0.28    |        | 220.56         | 140.93        | -1.52   |        | 2.17 (2.02, | 0.74 (0.68, | -3.62   |        |
|                              | (113.02,      | (117.98, | (0.13,  | <0.001 | (1856.73, | (2011.02, | (0.24,  | <0.001 | (219.01,       | (140.13,      | (-1.60, | <0.001 | 2.33)       | 0.80)       | (-3.76, | <0.001 |
| Central Latin America        | 30.43 (29.86, | 31.78    | 0.16    |        | 559.75    | 584.03    | 0.15    |        | 100.99 (99.89, | 38.87 (38.33, | -3.21   |        | 1.28 (1.16, | 0.19 (0.15, | -6.27   |        |
|                              | 31.01)        | (31.30,  | (0.14,  | <0.001 | (557.23,  | (581.94,  | (0.13,  | <0.001 | 102.09)        | 39.41)        | (-3.39, | <0.001 | 1.41)       | 0.23)       | (-6.57, | <0.001 |
| 12                           |               |          |         |        |           |           |         |        |                |               |         |        |             |             |         |        |

|                             |                         |                         |                      |        |                            |                            |                      |        |                         |                         |                      |        |                   |                   |                      |        |
|-----------------------------|-------------------------|-------------------------|----------------------|--------|----------------------------|----------------------------|----------------------|--------|-------------------------|-------------------------|----------------------|--------|-------------------|-------------------|----------------------|--------|
|                             |                         | 32.28)                  | 0.17)                |        | 562.28)                    | 586.12)                    | 0.18)                |        |                         |                         | -3.04)               |        |                   |                   | -5.97)               |        |
| Tropical Latin America      | 77.00 (76.06, 77.95)    | 77.60 (76.77, 78.44)    | 0.03 (-0.03, 0.09)   | 0.285  | 1506.14 (1501.90, 1510.39) | 1549.94 (1546.29, 1553.59) | 0.10 (0.09, 0.11)    | <0.001 | 167.82 (166.40, 169.25) | 100.37 (99.45, 101.30)  | -1.75 (-1.88, -1.62) | <0.001 | 1.62 (1.48, 1.77) | 0.46 (0.40, 0.53) | -4.16 (-4.54, -3.78) | <0.001 |
| Central Sub-Saharan Africa  | 105.89 (103.96, 107.85) | 108.75 (107.51, 110.00) | 0.10 (0.08, 0.12)    | <0.001 | 1874.95 (1866.53, 1883.40) | 1923.92 (1918.53, 1929.33) | 0.09 (0.07, 0.12)    | <0.001 | 228.42 (225.43, 231.44) | 142.09 (140.61, 143.58) | -1.64 (-1.72, -1.56) | <0.001 | 2.38 (2.08, 2.71) | 0.88 (0.76, 1.01) | -3.41 (-3.50, -3.32) | <0.001 |
| Western Europe              | 0.64 (0.58, 0.70)       | 0.37 (0.32, 0.42)       | -1.90 (-1.97, -1.82) | <0.001 | 10.21 (9.98, 10.45)        | 7.67 (7.46, 7.89)          | -1.00 (-1.13, -0.88) | <0.001 | 13.07 (12.81, 13.33)    | 4.29 (4.13, 4.45)       | -3.82 (-3.98, -3.65) | <0.001 | 0.21 (0.18, 0.25) | 0.06 (0.05, 0.09) | -4.25 (-4.59, -3.90) | <0.001 |
| High-income North America   | 2.29 (2.17, 2.42)       | 1.59 (1.50, 1.70)       | -1.25 (-1.31, -1.18) | <0.001 | 33.41 (32.94, 33.88)       | 25.36 (24.96, 25.76)       | -0.94 (-0.98, -0.89) | <0.001 | 17.84 (17.50, 18.18)    | 6.98 (6.78, 7.19)       | -3.15 (-3.51, -2.78) | <0.001 | 0.28 (0.23, 0.32) | 0.09 (0.07, 0.12) | -3.72 (-4.95, -2.48) | <0.001 |
| Central Asia                | 49.28 (48.14, 50.44)    | 51.70 (50.66, 52.77)    | 0.17 (0.15, 0.20)    | <0.001 | 894.70 (889.78, 899.64)    | 966.57 (962.12, 971.04)    | 0.27 (0.26, 0.28)    | <0.001 | 351.03 (347.93, 354.16) | 151.22 (149.47, 152.98) | -2.82 (-3.42, -2.22) | <0.001 | 5.22 (4.84, 5.62) | 1.78 (1.60, 1.98) | -3.60 (-4.18, -3.01) | <0.001 |
| Eastern Europe              | 5.03 (4.83, 5.24)       | 3.09 (2.92, 3.28)       | -1.62 (-1.71, -1.54) | <0.001 | 43.69 (43.08, 44.31)       | 35.12 (34.49, 35.76)       | -0.73 (-0.85, -0.62) | <0.001 | 56.96 (56.26, 57.66)    | 12.06 (11.70, 12.43)    | -5.05 (-6.13, -3.96) | <0.001 | 0.96 (0.87, 1.05) | 0.18 (0.14, 0.23) | -5.48 (-6.71, -4.24) | <0.001 |
| Southern Sub-Saharan Africa | 103.71 (101.87, 105.57) | 104.89 (103.34, 106.46) | 0.04 (0.02, 0.07)    | <0.001 | 1788.66 (1780.78, 1796.57) | 1815.89 (1809.46, 1822.33) | 0.05 (0.04, 0.07)    | <0.001 | 289.85 (286.64, 293.08) | 158.39 (156.49, 160.30) | -2.09 (-2.83, -1.35) | <0.001 | 3.43 (3.09, 3.81) | 1.18 (1.03, 1.36) | -3.58 (-4.81, -2.33) | <0.001 |
| High-income Asia Pacific    | 0.63 (0.55, 0.72)       | 0.31 (0.24, 0.38)       | -2.46 (-2.75, -2.17) | <0.001 | 13.13 (12.74, 13.52)       | 9.36 (8.99, 9.75)          | -1.18 (-1.23, -1.12) | <0.001 | 11.92 (11.55, 12.29)    | 3.17 (2.95, 3.39)       | -4.48 (-4.86, -4.10) | <0.001 | 0.19 (0.14, 0.24) | 0.04 (0.02, 0.08) | -5.01 (-5.37, -4.66) | <0.001 |
| Central Europe              | 3.67 (3.43, 3.93)       | 2.64 (2.40, 2.91)       | -1.13 (-1.29, -0.97) | <0.001 | 48.90 (47.99, 49.82)       | 41.78 (40.80, 42.77)       | -0.54 (-0.70, -0.38) | <0.001 | 61.00 (60.02, 62.00)    | 9.82 (9.37, 10.29)      | -6.12 (-6.42, -5.81) | <0.001 | 1.03 (0.91, 1.17) | 0.13 (0.09, 0.20) | -6.85 (-7.20, -6.50) | <0.001 |
| Andean Latin America        | 69.29 (67.49, 71.13)    | 69.40 (67.96, 70.86)    | 0.00 (-0.01, 0.01)   | 0.558  | 1270.45 (1262.45, 1278.49) | 1306.82 (1300.56, 1313.11) | 0.10 (0.09, 0.10)    | <0.001 | 135.85 (133.22, 138.52) | 80.92 (79.37, 82.50)    | -1.77 (-2.04, -1.50) | <0.001 | 1.28 (1.03, 1.57) | 0.32 (0.23, 0.43) | -4.68 (-5.41, -3.94) | <0.001 |
| Caribbean                   | 66.28 (64.49, 68.12)    | 72.73 (70.99, 74.47)    | 0.33 (0.32, 0.34)    | <0.001 | 1213.37 (1205.45, 1221.29) | 1292.77 (1285.40, 1299.14) | 0.22 (0.21, 0.23)    | <0.001 | 328.40 (324.24, 332.56) | 210.53 (207.57, 213.49) | -1.48 (-1.74, -1.22) | <0.001 | 4.57 (4.08, 5.06) | 2.51 (2.19, 2.83) | -2.01 (-2.34, -1.68) | <0.001 |

|                        |                      |                      |               |                |                      |                      |                  |                |                      |                      |                      |                |                   |                     |                    |                |        |  |
|------------------------|----------------------|----------------------|---------------|----------------|----------------------|----------------------|------------------|----------------|----------------------|----------------------|----------------------|----------------|-------------------|---------------------|--------------------|----------------|--------|--|
|                        |                      | 74.51)               | 0.34)         |                | 1221.33)             | 1300.16)             | 0.23)            |                | 332.61)              | 213.53)              | -1.21)               |                |                   |                     | -1.68)             |                |        |  |
| Southern Latin America | 32.88 (31.75, 34.04) | 35.06                | 0.22          |                | 673.24               | 738.39               | 0.32             |                | 83.65 (81.82, 85.51) | 46.31 (45.13, 47.50) | -2.01                |                | 0.89 (0.71, 1.10) | 0.19 (0.12, 0.28)   | -5.17              |                |        |  |
|                        |                      | (34.02, 36.11)       | (0.20, 0.24)  | <0.001         | (668.06, 678.45)     | (733.69, 743.12)     | (0.29, 0.34)     | <0.001         |                      |                      |                      | (-2.13, -1.89) | <0.001            |                     |                    | (-5.54, -4.80) |        |  |
|                        |                      | 43.62 (40.05, 47.45) | 46.66         | 0.24           |                      | 774.06               | 840.99           | 0.30           |                      | 672.52               | 620.19               | -0.28          |                   | 10.73 (8.94, 12.79) | 9.76 (8.60, 11.04) | -0.32          |        |  |
| Oceania                | 43.62 (40.05, 47.45) | (44.10, 49.33)       | (0.21, 0.26)  | <0.001         | (758.71, 789.66)     | (830.00, 852.09)     | (0.22, 0.38)     | <0.001         | (657.91, 687.39)     | (610.69, 629.80)     | (-0.47, -0.09)       | 0.005          |                   |                     | (-0.52, -0.13)     | 0.001          |        |  |
|                        |                      | 1.60 (1.24, 2.03)    | 1.26          | -0.79          |                      | 30.62 (28.95, 32.37) | 28.96            | -0.19          |                      | 27.80 (26.22, 29.46) | 12.43 (11.48, 13.45) | -2.70          |                   | 0.44 (0.26, 0.70)   | 0.19 (0.09, 0.36)  | -2.80          |        |  |
|                        |                      |                      | 1.62)         | (-0.92, -0.65) | <0.001               |                      | (27.47, 30.52)   | (-0.23, -0.14) | <0.001               |                      |                      | (-3.20, -2.20) | <0.001            |                     |                    | (-2.91, -2.69) | <0.001 |  |
| <b>Men</b>             |                      |                      |               |                |                      |                      |                  |                |                      |                      |                      |                |                   |                     |                    |                |        |  |
| Global                 | 37.95 (37.84, 38.06) | 45.24                | 0.61          |                | 571.58               | 678.33               | 0.61             |                | 173.02               | 112.58               | -1.45                |                | 2.43 (2.40, 2.46) | 1.32 (1.30, 1.34)   | -2.06              |                |        |  |
|                        |                      | (45.13, 45.34)       | (0.56, 0.66)  | <0.001         | (571.13, 572.03)     | (677.92, 678.75)     | (0.56, 0.65)     | <0.001         | (172.78, 173.27)     | (112.41, 112.75)     | (-1.63, -1.27)       | <0.001         |                   |                     | (-2.29, -1.83)     | <0.001         |        |  |
|                        |                      | <b>SDI category</b>  |               |                |                      |                      |                  |                |                      |                      |                      |                |                   |                     |                    |                |        |  |
| High                   | 1.17 (1.12, 1.22)    | 1.28                 | 0.29          |                | 18.96 (18.75, 19.17) | 25.42                | 1.09             |                | 16.06 (15.87, 16.25) | 6.99 (6.87, 7.11)    | -2.78                |                | 0.26 (0.23, 0.28) | 0.10 (0.08, 0.11)   | -3.18              |                |        |  |
|                        |                      | (1.23, 1.33)         | (-0.01, 0.59) | 0.054          |                      | (25.19, 25.65)       | (0.88, 1.30)     | <0.001         |                      |                      | (-3.04, -2.51)       | <0.001         |                   |                     | (-3.57, -2.80)     | <0.001         |        |  |
|                        |                      | 18.03 (17.86, 18.20) | 17.87         | -0.02          |                      | 288.50               | 290.40           | 0.03           |                      | 90.55 (90.17, 90.93) | 35.90 (35.67, 36.13) | -3.12          |                   | 1.30 (1.26, 1.35)   | 0.37 (0.34, 0.39)  | -4.25          |        |  |
| High-middle            | 18.03 (17.86, 18.20) | (17.70, 18.04)       | (-0.07, 0.03) | 0.416          | (287.83, 289.17)     | (289.74, 291.05)     | (-0.04, 0.10)    | 0.364          |                      |                      | (-3.41, -2.84)       | <0.001         |                   |                     | (-4.60, -3.90)     | <0.001         |        |  |
|                        |                      | 41.05 (40.85, 41.25) | 40.79         | -0.04          |                      | 679.74               | 660.52           | -0.09          |                      | 161.87               | 84.36 (84.09, 84.62) | -2.21          |                   | 2.18 (2.13, 2.23)   | 0.87 (0.85, 0.90)  | -3.11          |        |  |
|                        |                      |                      | 40.97)        | (-0.15, 0.07)  | 0.511                | (678.90, 680.58)     | (659.78, 661.25) | (-0.12, -0.05) | <0.001               | (161.46, 162.29)     |                      | (-2.50, -1.92) | <0.001            |                     |                    | (-3.50, -2.72) | <0.001 |  |
| Low-middle             | 61.00 (60.68, 61.32) | 63.91                | 0.19          |                | 851.09               | 918.79               | 0.29             |                | 348.12               | 205.64               | -1.78                |                | 5.15 (5.05, 5.24) | 2.71 (2.65, 2.76)   | -2.15              |                |        |  |
|                        |                      | (63.65, 64.16)       | (0.03, 0.35)  | 0.018          | (849.86, 852.32)     | (917.80, 919.77)     | (0.18, 0.40)     | <0.001         | (347.33, 348.92)     | (205.18, 206.11)     | (-2.05, -1.51)       | <0.001         |                   |                     | (-2.44, -1.85)     | <0.001         |        |  |
|                        |                      | 80.63 (80.07, 81.19) | 82.96         | 0.11           |                      | 1214.92              | 1293.28          | 0.23           |                      | 310.72               | 197.94               | -1.53          |                   | 4.21 (4.07, 4.34)   | 2.26 (2.19, 2.33)  | -2.12          |        |  |
| Low                    | 80.63 (80.07, 81.19) | (82.59, 83.34)       | (0.09, 0.14)  | <0.001         | (1212.67, 1217.17)   | (1291.76, 1294.81)   | (0.18, 0.27)     | <0.001         | (309.57, 311.87)     | (197.34, 198.55)     | (-1.84, -1.22)       | <0.001         |                   |                     | (-2.54, -1.69)     | <0.001         |        |  |
|                        |                      | <b>21 GBD region</b> |               |                |                      |                      |                  |                |                      |                      |                      |                |                   |                     |                    |                |        |  |

|                              |               |          |         |        |               |             |         |        |               |               |         |        |             |             |         |        |
|------------------------------|---------------|----------|---------|--------|---------------|-------------|---------|--------|---------------|---------------|---------|--------|-------------|-------------|---------|--------|
| South Asia                   | 62.80 (62.47, | 62.94    | 0.06    |        | 816.00        | 847.13      | 0.17    |        | 460.93        | 271.98        | -1.77   |        | 7.04 (6.93, | 3.87 (3.81, | -2.02   |        |
|                              | 63.12)        | (62.70,  | (-0.24, | 0.677  | (814.79,      | (846.21,    | (0.03,  | 0.021  | (460.02,      | (271.46,      | (-2.05, | <0.001 | 7.16)       | 3.93)       | (-2.32, | <0.001 |
|                              |               | 63.19)   | 0.37)   |        | 817.20)       | 848.04)     | 0.32)   |        | 461.84)       | 272.50)       | -1.50)  |        |             |             | -1.71)  |        |
| East Asia                    | 33.48 (33.27, | 27.94    | -0.63   |        | 587.58        | 473.53      | -0.75   |        | 127.16        |               | -3.81   |        | 1.68 (1.63, | 0.32 (0.30, | -5.66   |        |
|                              | 33.69)        | (27.72,  | (-0.69, | <0.001 | (586.70,      | (472.68,    | (-0.77, | <0.001 | (126.75,      | 41.66 (41.41, | (-4.05, | <0.001 | 1.73)       | 0.34)       | (-6.02, | <0.001 |
|                              |               | 28.15)   | -0.56)  |        | 588.47)       | 474.38)     | -0.72)  |        | 127.58)       | 41.91)        | -3.57)  |        |             |             | -5.30)  |        |
| North Africa and Middle East | 32.20 (31.78, | 34.50    | 0.24    |        | 489.42        | 518.03      | 0.20    |        |               |               | -2.03   |        | 1.04 (0.96, | 0.37 (0.34, | -3.48   |        |
|                              | 32.62)        | (34.18,  | (0.22,  | <0.001 | (487.75,      | (516.81,    | (0.18,  | <0.001 | 86.41 (85.71, | 47.20 (46.84, | (-2.15, | <0.001 | 1.12)       | 0.40)       | (-3.71, | <0.001 |
|                              |               | 34.82)   | 0.27)   |        | 491.11)       | 519.24)     | 0.23)   |        | 87.12)        | 47.57)        | -1.91)  |        |             |             | -3.26)  |        |
| Western Sub-Saharan Africa   | 73.11 (72.22, | 75.05    | 0.09    |        | 1190.73       | 1238.08     | 0.14    |        | 117.86        |               | -1.02   |        | 0.99 (0.88, | 0.46 (0.41, | -2.62   |        |
|                              | 74.02)        | (74.47,  | (0.08,  | <0.001 | (1187.02,     | (1235.66,   | (0.13,  | <0.001 | (116.71,      | 87.54 (86.90, | (-1.11, | <0.001 | 1.10)       | 0.51)       | (-2.81, | <0.001 |
|                              |               | 75.62)   | 0.10)   |        | 1194.45)      | 1240.49)    | 0.15)   |        | 119.03)       | 88.18)        | -0.93)  |        |             |             | -2.44)  |        |
| Southeast Asia               | 20.35 (20.06, | 20.13    | -0.03   |        | 294.20        | 309.33      | 0.17    |        | 110.99        |               | -2.15   |        | 1.63 (1.55, | 0.71 (0.67, | -2.76   |        |
|                              | 20.63)        | (19.90,  | (-0.08, | 0.216  | (293.11,      | (308.40,    | (0.13,  | <0.001 | (110.31,      | 58.69 (58.29, | (-2.29, | <0.001 | 1.72)       | 0.76)       | (-3.03, | <0.001 |
|                              |               | 20.37)   | 0.02)   |        | 295.30)       | 310.26)     | 0.21)   |        | 111.67)       | 59.10)        | -2.02)  |        |             |             | -2.49)  |        |
| Eastern Sub-Saharan Africa   | 102.17        | 103.71   | 0.06    |        | 1634.38       | 1749.59     | 0.24    |        | 172.04        | 128.00        | -1.00   |        | 1.47 (1.35, | 0.69 (0.64, | -2.54   |        |
|                              | (101.11,      | (103.03, | (0.03,  | <0.001 | (1629.97,     | (1746.66,   | (0.20,  | <0.001 | (170.65,      | (127.22,      | (-1.14, | <0.001 | 1.61)       | 0.75)       | (-2.78, | <0.001 |
|                              | 103.24)       | 104.40)  | 0.08)   |        | 1638.81)      | 1752.52)    | 0.28)   |        | 173.44)       | 128.79)       | -0.85)  |        |             |             | -2.29)  |        |
| Central Latin America        | 26.12 (25.58, | 27.41    | 0.18    |        | 425.77        | 443.44      | 0.14    |        |               |               | -2.52   |        | 0.73 (0.64, | 0.15 (0.12, | -5.26   |        |
|                              | 26.67)        | (26.96,  | (0.08,  | <0.001 | (423.51,      | (441.59,    | (0.12,  | <0.001 | 63.94 (63.05, | 30.21 (29.73, | (-2.72, | <0.001 | 0.84)       | 0.19)       | (-5.65, | <0.001 |
|                              |               | 27.88)   | 0.28)   |        | 428.04)       | 445.30)     | 0.17)   |        | 64.83)        | 30.70)        | -2.32)  |        |             |             | -4.86)  |        |
| Tropical Latin America       | 71.76 (70.84, | 70.68    | -0.05   |        | 1201.67       | 1195.90     | -0.02   |        | 134.93        |               | -1.82   |        | 1.27 (1.15, | 0.37 (0.32, | -4.16   |        |
|                              | 72.69)        | (69.89,  | (-0.07, | <0.001 | (1197.83,     | (1192.68,   | (-0.03, | <0.001 | (133.64,      | 79.66 (78.84, | (-1.98, | <0.001 | 1.41)       | 0.43)       | (-4.46, | <0.001 |
|                              |               | 71.48)   | -0.03)  |        | 1205.53)      | 1199.13)    | -0.01)  |        | 136.23)       | 80.50)        | -1.65)  |        |             |             | -3.87)  |        |
| Central Sub-Saharan Africa   | 99.94 (98.05, | 101.08   | 0.04    |        | 1815.12       | 1820.86     | 0.01    |        | 156.24        | 128.11        | -0.70   |        | 1.09 (0.90, | 0.65 (0.55, | -1.76   |        |
|                              | 101.87)       | (99.88,  | (0.01,  | 0.004  | (1806.76,     | (1815.58,   | (-0.01, | 0.352  | (153.84,      | (126.73,      | (-0.75, | <0.001 | 1.31)       | 0.76)       | (-2.00, | <0.001 |
|                              |               | 102.30)  | 0.07)   |        | 1823.51)      | 1826.15)    | 0.04)   |        | 158.67)       | 129.51)       | -0.66)  |        |             |             | -1.53)  |        |
| Western Europe               | 0.64 (0.59,   | 0.41     | -1.56   |        | 9.15 (8.93,   | 6.92 (6.72, | -0.98   |        | 14.87 (14.59, | 5.10 (4.93,   | -3.66   |        | 0.24 (0.21, | 0.08 (0.06, | -3.76   |        |
|                              | 0.70)         | (0.37,   | (-1.71, | <0.001 | 9.37)         | 7.12)       | (-1.16, | <0.001 | 15.15)        | 5.27)         | (-4.25, | <0.001 | 0.28)       | 0.10)       | (-4.29, | <0.001 |
|                              |               | 0.46)    | -1.40)  |        |               |             | -0.80)  |        |               |               | -3.08)  |        |             |             | -3.23)  |        |
| High-income North America    | 1.54 (1.44,   | 1.04     | -1.34   |        | 25.15 (24.74, | 18.16       | -1.10   |        | 14.83 (14.53, | 5.92 (5.74,   | -3.09   |        | 0.23 (0.20, | 0.08 (0.06, | -3.57   |        |
|                              | 1.65)         | (0.97,   | (-1.45, | <0.001 | 25.56)        | (17.82,     | (-1.14, | <0.001 | 15.15)        | 6.12)         | (-3.68, | <0.001 | 0.28)       | 0.11)       | (-4.61, | <0.001 |
|                              |               | 1.13)    | -1.23)  |        |               | 18.50)      | -1.07)  |        |               |               | -2.51)  |        |             |             | -2.52)  |        |

|                               |               |         |         |        |               |             |         |        |               |               |         |             |              |             |         |        |
|-------------------------------|---------------|---------|---------|--------|---------------|-------------|---------|--------|---------------|---------------|---------|-------------|--------------|-------------|---------|--------|
|                               |               | 51.57   | 0.22    |        | 771.61        | 845.88      | 0.32    | 275.63 | 130.46        | -2.50         |         | 4.04 (3.71, | 1.51 (1.34,  | -3.28       |         |        |
| Central Asia                  | 48.39 (47.26, | (50.54, | (0.19,  | <0.001 | (767.02,      | (841.76,    | (0.30,  | <0.001 | (272.86,      | (128.85,      | (-3.18, | <0.001      | 4.40)        | 1.70)       | (-4.19, | <0.001 |
|                               | 49.55)        | 52.61)  | 0.24)   |        | 776.23)       | 850.02)     | 0.33)   |        | 278.43)       | 132.09)       | -1.82)  |             |              |             | -2.36)  |        |
|                               |               | 3.27    | -2.32   |        | 47.20 (46.57, | 32.92       | -1.22   |        | 95.60 (94.70, | 21.11 (20.64, | -4.94   |             | 1.63 (1.52,  | 0.34 (0.28, | -5.14   |        |
| Eastern Europe                | 6.51 (6.28,   | (3.09,  | (-2.42, | <0.001 | 47.84)        | (32.32,     | (-1.38, | <0.001 | 96.50)        | 21.58)        | (-6.12, | <0.001      | 1.75)        | 0.41)       | (-6.37, | <0.001 |
|                               | 6.75)         | 3.46)   | -2.22)  |        |               | 33.53)      | -1.06)  |        |               |               | -3.74)  |             |              |             | -3.91)  |        |
| Southern                      |               | 93.61   | 0.04    |        | 1566.77       | 1598.63     | 0.07    |        | 192.66        | 160.98        | -0.60   |             | 1.94 (1.68,  | 1.35 (1.18, | -1.32   |        |
| Sub-Saharan                   | 92.67 (90.87, | (92.15, | (0.03,  | <0.001 | (1559.12,     | (1592.59,   | (0.06,  | <0.001 | (189.98,      | (159.06,      | (-0.83, | <0.001      | 2.24)        | 1.54)       | (-1.64, | <0.001 |
| Africa                        | 94.50)        | 95.09)  | 0.05)   |        | 1574.45)      | 1604.68)    | 0.08)   |        | 195.38)       | 162.92)       | -0.38)  |             |              |             | -1.00)  |        |
|                               |               | 0.28    | -2.24   |        | 13.19 (12.81, | 9.76 (9.39, | -1.03   |        | 10.43 (10.09, | 3.27 (3.06,   | -3.92   |             | 0.16 (0.12,  | 0.05 (0.02, | -4.25   |        |
| High-income Asia              | 0.54 (0.47,   | (0.22,  | (-2.55, | <0.001 | 13.58)        | 10.14)      | (-1.10, | <0.001 | 10.78)        | 3.49)         | (-4.17, | <0.001      | 0.21)        | 0.08)       | (-4.59, | <0.001 |
| Pacific                       | 0.63)         | 0.35)   | -1.92)  |        |               |             | -0.97)  |        |               |               | -3.66)  |             |              |             | -3.91)  |        |
|                               |               | 3.06    | -1.35   |        | 49.67 (48.77, | 40.64       | -0.71   |        | 81.23 (80.10, | 12.97 (12.46, | -6.21   |             | 1.38 (1.23,  | 0.19 (0.13, | -6.67   |        |
| Central Europe                | 4.55 (4.28,   | (2.80,  | (-1.50, | <0.001 | 50.58)        | (39.70,     | (-0.85, | <0.001 | 82.37)        | 13.50)        | (-6.54, | <0.001      | 1.53)        | 0.26)       | (-7.13, | <0.001 |
|                               | 4.83)         | 3.33)   | -1.20)  |        |               | 41.59)      | -0.58)  |        |               |               | -5.89)  |             |              |             | -6.21)  |        |
|                               |               | 62.53   | -0.04   |        | 1065.88       | 1069.81     | 0.00    |        | 97.52 (95.26, | 66.97 (65.56, | -1.29   |             | 0.77 (0.58,  | 0.26 (0.18, | -3.64   |        |
| Andean Latin                  | 63.01 (61.26, | (61.18, | (-0.06, | 0.001  | (1058.40,     | (1064.17,   | (-0.02, | 0.764  | 99.81)        | 68.40)        | (-1.40, | <0.001      | 1.00)        | 0.36)       | (-4.11, | <0.001 |
| America                       | 64.81)        | 63.91)  | -0.01)  |        | 1073.39)      | 1075.48)    | 0.03)   |        |               |               | -1.18)  |             |              |             | -3.17)  |        |
|                               |               | 63.90   | 0.24    |        | 1013.02       | 1055.85     | 0.14    |        | 161.26        | 115.32        | -1.07   |             | 1.88 (1.56,  | 1.08 (0.88, | -1.77   |        |
| Caribbean                     | 59.57 (57.83, | (62.26, | (0.22,  | <0.001 | (1005.62,     | (1049.15,   | (0.10,  | <0.001 | (158.29,      | (113.11,      | (-1.26, | <0.001      | 2.23)        | 1.32)       | (-2.08, | <0.001 |
|                               | 61.36)        | 65.57)  | 0.26)   |        | 1020.46)      | 1062.58)    | 0.17)   |        | 164.26)       | 117.56)       | -0.88)  |             |              |             | -1.45)  |        |
|                               |               | 36.29   | 0.21    |        | 594.17        | 641.70      | 0.27    |        | 75.06 (73.31, | 41.39 (40.28, | -2.03   |             | 0.79 (0.62,  | 0.18 (0.11, | -5.01   |        |
| Southern Latin                | 34.11 (32.95, | (35.25, | (0.19,  | <0.001 | (589.25,      | (637.30,    | (0.25,  | <0.001 | 76.84)        | 42.53)        | (-2.17, | <0.001      | 1.00)        | 0.27)       | (-5.37, | <0.001 |
| America                       | 35.30)        | 37.37)  | 0.24)   |        | 599.12)       | 646.12)     | 0.28)   |        |               |               | -1.89)  |             |              |             | -4.64)  |        |
|                               |               | 40.99   | 0.19    |        | 649.91        | 702.31      | 0.27    |        | 675.52        | 598.05        | -0.46   |             | 10.75 (9.01, | 9.34 (8.21, | -0.52   |        |
| Oceania                       | 38.82 (35.52, | (38.63, | (0.17,  | <0.001 | (636.20,      | (692.43,    | (0.23,  | <0.001 | (661.33,      | (588.88,      | (-0.60, | <0.001      | 12.75)       | 10.57)      | (-0.66, | <0.001 |
|                               | 42.36)        | 43.47)  | 0.21)   |        | 663.86)       | 712.30)     | 0.31)   |        | 689.95)       | 607.33)       | -0.31)  |             |              |             | -0.38)  |        |
|                               |               | 0.61    | -0.91   |        | 18.51 (17.22, | 17.41       | -0.20   |        | 29.48 (27.84, | 12.49 (11.53, | -2.87   |             | 0.47 (0.29,  | 0.20 (0.09, | -2.87   |        |
| Australasia                   | 0.79 (0.55,   | (0.42,  | (-1.15, | <0.001 | 19.88)        | (16.25,     | (-0.28, | <0.001 | 31.19)        | 13.52)        | (-3.25, | <0.001      | 0.74)        | 0.37)       | (-3.23, | <0.001 |
|                               | 1.12)         | 0.88)   | -0.67)  |        |               | 18.64)      | -0.12)  |        |               |               | -2.48)  |             |              |             | -2.51)  |        |
| <b>Ischemic heart disease</b> |               |         |         |        |               |             |         |        |               |               |         |             |              |             |         |        |
| <b>Overall</b>                |               |         |         |        |               |             |         |        |               |               |         |             |              |             |         |        |



|                              |               |         |         |        |          |          |         |        |          |          |         |        |             |             |         |        |
|------------------------------|---------------|---------|---------|--------|----------|----------|---------|--------|----------|----------|---------|--------|-------------|-------------|---------|--------|
| Global                       | 26.35 (26.28, | 26.33   | -0.00   |        | 177.62   | 180.42   | 0.05    |        | 459.57   | 402.58   | -0.46   |        | 8.02 (7.98, | 7.02 (6.99, | -0.46   |        |
|                              | 26.42)        | (26.27, | (-0.01, | 0.842  | (177.44, | (180.27, | (0.04,  | <0.001 | (459.28, | (402.36, | (-0.74, | 0.002  | 8.06)       | 7.05)       | (-0.76, | 0.003  |
|                              |               | 26.39)  | 0.01)   |        | 177.81)  | 180.57)  | 0.07)   |        | 459.86)  | 402.81)  | -0.17)  |        |             |             | -0.16)  |        |
| <b>SDI category</b>          |               |         |         |        |          |          |         |        |          |          |         |        |             |             |         |        |
| High                         | 33.19 (32.99, | 31.12   | -0.22   |        | 177.53   | 186.09   | 0.17    |        | 233.21   | 141.17   | -1.71   |        | 4.09 (4.03, | 2.47 (2.42, | -1.73   |        |
|                              | 33.38)        | (30.94, | (-0.26, | <0.001 | (177.08, | (185.65, | (0.08,  | <0.001 | (232.69, | (140.79, | (-1.92, | <0.001 | 4.16)       | 2.53)       | (-1.94, | <0.001 |
| High-middle                  |               | 31.30)  | -0.18)  |        | 177.98)  | 186.53)  | 0.26)   |        | 233.72)  | 141.56)  | -1.51)  |        |             |             | -1.51)  |        |
|                              | 25.31 (25.16, | 23.68   | -0.23   |        | 192.94   | 193.38   | 0.01    |        | 454.34   | 317.71   | -1.19   |        | 8.00 (7.92, | 5.53 (5.47, | -1.22   |        |
|                              | 25.45)        | (23.56, | (-0.26, | <0.001 | (192.55, | (193.03, | (-0.01, | 0.290  | (453.74, | (317.25, | (-1.72, | <0.001 | 8.08)       | 5.59)       | (-1.77, | <0.001 |
| Middle                       |               | 23.81)  | -0.20)  |        | 193.33)  | 193.74)  | 0.02)   |        | 454.94)  | 318.18)  | -0.66)  |        |             |             | -0.68)  |        |
|                              | 24.32 (24.20, | 25.78   | 0.21    |        | 186.58   | 192.12   | 0.11    |        | 498.62   | 445.65   | -0.34   |        | 8.65 (8.58, | 7.72 (7.67, | -0.34   |        |
|                              | 24.43)        | (25.68, | (0.19,  | <0.001 | (186.25, | (191.84, | (0.08,  | <0.001 | (498.09, | (445.23, | (-0.57, | 0.005  | 8.72)       | 7.78)       | (-0.57, | 0.003  |
| Low-middle                   |               | 25.88)  | 0.23)   |        | 186.91)  | 192.39)  | 0.13)   |        | 499.15)  | 446.07)  | -0.10)  |        |             |             | -0.11)  |        |
|                              | 25.12 (24.96, | 26.05   | 0.13    |        | 157.26   | 164.89   | 0.17    |        | 604.93   | 557.08   | -0.23   |        | 10.59       | 9.80 (9.73, | -0.21   |        |
|                              | 25.28)        | (25.93, | (0.11,  | <0.001 | (156.86, | (164.59, | (0.15,  | <0.001 | (604.16, | (556.53, | (-0.54, | 0.154  | (10.49,     | 9.88)       | (-0.54, | 0.222  |
| Low                          |               | 26.17)  | 0.14)   |        | 157.66)  | 165.19)  | 0.19)   |        | 605.70)  | 557.63)  | 0.09)   |        | 10.69)      |             | 0.13)   |        |
|                              | 26.55 (26.30, | 27.85   | 0.16    |        | 144.95   | 153.84   | 0.21    |        | 413.41   | 389.40   | -0.19   |        | 7.28 (7.15, | 6.85 (6.77, | -0.19   |        |
|                              | 26.80)        | (27.69, | (0.15,  | <0.001 | (144.37, | (153.44, | (0.17,  | <0.001 | (412.44, | (388.78, | (-0.33, | 0.008  | 7.41)       | 6.93)       | (-0.34, | 0.014  |
|                              |               | 28.02)  | 0.18)   |        | 145.54)  | 154.23)  | 0.26)   |        | 414.39)  | 390.02)  | -0.05)  |        |             | -0.04)      |         |        |
| <b>21 GBD region</b>         |               |         |         |        |          |          |         |        |          |          |         |        |             |             |         |        |
| South Asia                   | 25.73 (25.58, | 26.42   | 0.09    |        | 152.78   | 161.75   | 0.20    |        | 726.51   | 682.58   | -0.18   |        | 12.72       | 12.03       | -0.15   |        |
|                              | 25.89)        | (26.30, | (0.07,  | <0.001 | (152.39, | (161.46, | (0.19,  | <0.001 | (725.67, | (681.99, | (-0.59, | 0.394  | (12.60,     | (11.95,     | (-0.58, | 0.501  |
|                              |               | 26.54)  | 0.11)   |        | 153.17)  | 162.05)  | 0.21)   |        | 727.35)  | 683.18)  | 0.24)   |        | 12.83)      | 12.11)      | 0.28)   |        |
| East Asia                    | 20.02 (19.90, | 19.83   | -0.04   |        | 212.36   | 223.15   | 0.16    |        | 354.92   | 300.63   | -0.45   |        | 6.06 (5.99, | 5.13 (5.07, | -0.46   |        |
|                              | 20.14)        | (19.71, | (-0.08, | 0.050  | (211.96, | (222.77, | (0.11,  | <0.001 | (354.42, | (300.17, | (-0.75, | 0.003  | 6.13)       | 5.18)       | (-0.77, | 0.005  |
|                              |               | 19.94)  | 0.00)   |        | 212.75)  | 223.53)  | 0.21)   |        | 355.43)  | 301.09)  | -0.15)  |        |             |             | -0.14)  |        |
| North Africa and Middle East | 38.74 (38.39, | 39.01   | 0.03    |        | 255.31   | 260.00   | 0.09    |        | 921.65   | 545.15   | -1.77   |        | 16.12       | 9.42 (9.30, | -1.81   |        |
|                              | 39.10)        | (38.78, | (0.01,  | 0.002  | (254.38, | (259.39, | (-0.02, | 0.125  | (919.91, | (544.26, | (-1.86, | <0.001 | (15.89,     | 9.54)       | (-1.90, | <0.001 |
|                              |               | 39.25)  | 0.04)   |        | 256.24)  | 260.61)  | 0.20)   |        | 923.38)  | 546.04)  | -1.68)  |        | 16.35)      |             | -1.72)  |        |
| Western Sub-Saharan Africa   | 24.64 (24.25, | 26.48   | 0.25    |        | 133.14   | 143.25   | 0.27    |        | 204.37   | 192.18   | -0.22   |        | 3.59 (3.44, | 3.36 (3.27, | -0.24   |        |
|                              | 25.04)        | (26.22, | (0.23,  | <0.001 | (132.20, | (142.63, | (0.21,  | <0.001 | (203.23, | (191.48, | (-0.46, | 0.076  | 3.75)       | 3.45)       | (-0.48, | 0.058  |
|                              |               | 26.73)  | 0.27)   |        | 134.08)  | 143.86)  | 0.33)   |        | 205.52)  | 192.88)  | 0.02)   |        |             |             | 0.01)   |        |
| Southeast Asia               | 21.11 (20.90, | 22.04   | 0.15    | <0.001 | 146.72   | 156.60   | 0.23    | <0.001 | 460.20   | 459.83   | 0.04    | 0.667  | 8.04 (7.91, | 8.00 (7.89, | 0.03    | 0.789  |
| 17                           |               |         |         |        |          |          |         |        |          |          |         |        |             |             |         |        |

|                  |               |         |         |        |          |          |         |        |          |               |         |        |             |             |         |        |
|------------------|---------------|---------|---------|--------|----------|----------|---------|--------|----------|---------------|---------|--------|-------------|-------------|---------|--------|
|                  | 21.33)        | (21.86, | (0.13,  |        | (146.15, | (156.14, | (0.19,  |        | (459.20, | (459.03,      | (-0.16, |        | 8.18)       | 8.10)       | (-0.18, |        |
|                  |               | 22.21)  | 0.16)   |        | 147.30)  | 157.07)  | 0.28)   |        | 461.20)  | 460.63)       | 0.25)   |        |             |             | 0.23)   |        |
| Eastern          |               | 26.36   | 0.20    |        | 130.88   | 140.61   | 0.26    |        | 255.47   | 220.54        | -0.50   |        |             |             | -0.52   |        |
| Sub-Saharan      | 24.86 (24.46, | (26.10, | (0.19,  | <0.001 | (129.93, | (139.98, | (0.23,  | <0.001 | (254.18, | (219.77,      | (-0.71, | <0.001 | 4.43 (4.26, | 3.80 (3.70, | (-0.74, | <0.001 |
| Africa           | 25.26)        | 26.63)  | 0.21)   |        | 131.84)  | 141.25)  | 0.28)   |        | 256.76)  | 221.31)       | -0.29)  |        | 4.61)       | 3.91)       | -0.29)  |        |
|                  |               | 23.60   | -0.30   |        | 151.13   | 143.02   | -0.19   |        | 339.84   | 270.17        | -0.77   |        |             |             | -0.79   |        |
| Central Latin    | 25.79 (25.38, | (23.30, | (-0.31, | <0.001 | (150.12, | (142.27, | (-0.22, | <0.001 | (338.36, | (269.15,      | (-1.30, | 0.005  | 5.91 (5.72, | 4.67 (4.54, | (-1.32, | 0.004  |
| America          | 26.19)        | 23.90)  | -0.29)  |        | 152.14)  | 143.76)  | -0.16)  |        | 341.32)  | 271.19)       | -0.24)  |        | 6.11)       | 4.81)       | -0.26)  |        |
|                  |               | 16.14   | -0.41   |        | 134.02   | 132.84   | -0.04   |        | 423.60   | 227.73        | -2.11   |        |             |             | -2.20   |        |
| Tropical Latin   | 18.13 (17.79, | (15.88, | (-0.51, | <0.001 | (133.08, | (132.11, | (-0.06, | 0.001  | (421.92, | (226.77,      | (-2.39, | <0.001 | 7.57 (7.34, | 3.97 (3.84, | (-2.50, | <0.001 |
| America          | 18.48)        | 16.40)  | -0.31)  |        | 134.97)  | 133.58)  | -0.02)  |        | 425.28)  | 228.70)       | -1.82)  |        | 7.79)       | 4.09)       | -1.91)  |        |
|                  |               | 28.63   | -0.10   |        | 133.47   | 131.04   | -0.06   |        | 281.28   | 230.30        | -0.72   |        |             |             | -0.73   |        |
| Central          | 29.46 (28.67, | (28.14, | (-0.11, | <0.001 | (131.74, | (129.96, | (-0.08, | <0.001 | (278.79, | (228.89,      | (-0.79, | <0.001 | 4.95 (4.63, | 4.05 (3.87, | (-0.80, | <0.001 |
| Sub-Saharan      | 30.26)        | 29.13)  | -0.09)  |        | 135.23)  | 132.13)  | -0.05)  |        | 283.78)  | 231.72)       | -0.66)  |        | 5.30)       | 4.25)       | -0.66)  |        |
| Africa           |               | 30.04   | -0.47   |        | 187.42   | 181.32   | -0.10   |        | 216.78   |               | -3.34   |        |             |             | -3.37   |        |
|                  | 34.47 (34.18, | (29.76, | (-0.50, | <0.001 | (186.72, | (180.63, | (-0.17, | 0.004  | (216.03, | 81.45 (80.99, | (-3.64, | <0.001 | 3.84 (3.74, | 1.43 (1.37, | (-3.68, | <0.001 |
| Western Europe   | 34.77)        | 30.33)  | -0.44)  |        | 188.12)  | 182.01)  | -0.03)  |        | 217.53)  | 81.92)        | -3.04)  |        | 3.94)       | 1.49)       | -3.06)  |        |
|                  |               | 35.49   | -0.21   |        | 173.25   | 185.59   | 0.24    |        | 217.15   | 159.16        | -1.02   |        |             |             | -1.08   |        |
| High-income      | 37.69 (37.35, | (35.17, | (-0.26, | <0.001 | (172.52, | (184.85, | (0.11,  | <0.001 | (216.32, | (158.47,      | (-1.41, | <0.001 | 3.87 (3.76, | 2.80 (2.71, | (-1.45, | <0.001 |
| North America    | 38.04)        | 35.83)  | -0.16)  |        | 173.98)  | 186.33)  | 0.36)   |        | 217.97)  | 159.85)       | -0.64)  |        | 3.98)       | 2.89)       | -0.70)  |        |
|                  |               | 34.86   | -0.12   |        | 206.14   | 200.90   | -0.09   |        | 666.28   | 617.05        | -0.27   |        |             |             | -0.31   |        |
| Central Asia     | 36.15 (35.44, | (34.28, | (-0.14, | <0.001 | (204.40, | (199.50, | (-0.10, | <0.001 | (663.14, | (614.59,      | (-0.70, | 0.222  | 11.96       | 10.92       | (-0.75, | 0.164  |
|                  | 36.88)        | 35.45)  | -0.10)  |        | 207.90)  | 202.31)  | -0.08)  |        | 669.43)  | 619.53)       | 0.16)   |        | 12.39)      | 11.25)      | 0.13)   |        |
|                  |               | 36.26   | 0.01    |        | 183.95   | 190.71   | 0.14    |        | 571.83   | 553.35        | 0.09    |        | 10.37       |             | 0.06    |        |
| Eastern Europe   | 36.14 (35.75, | (35.84, | (-0.03, | 0.602  | (183.09, | (189.78, | (0.10,  | <0.001 | (570.31, | (551.74,      | (-1.11, | 0.885  | 10.16,      | 9.92 (9.71, | (-1.14, | 0.929  |
|                  | 36.53)        | 36.69)  | 0.05)   |        | 184.81)  | 191.65)  | 0.18)   |        | 573.35)  | 554.96)       | 1.30)   |        | 10.57)      | 10.14)      | 1.27)   |        |
|                  |               | 34.15   | -0.13   |        | 157.51   | 154.31   | -0.07   |        | 297.46   | 184.08        | -1.57   |        |             |             | -1.63   |        |
| Southern         | 35.50 (34.66, | (33.53, | (-0.15, | <0.001 | (155.69, | (152.99, | (-0.09, | <0.001 | (294.96, | (182.64,      | (-2.87, | 0.019  | 5.33 (5.00, | 3.25 (3.06, | (-2.93, | 0.015  |
| Sub-Saharan      | 36.36)        | 34.77)  | -0.12)  |        | 159.34)  | 155.64)  | -0.04)  |        | 299.98)  | 185.53)       | -0.26)  |        | 5.68)       | 3.45)       | -0.32)  |        |
| Africa           |               | 19.48   | -0.30   |        | 123.30   | 117.47   | -0.16   |        | 246.94   |               | -4.10   |        |             |             | -4.08   |        |
| High-income Asia | 21.31 (20.96, | (19.12, | (-0.32, | <0.001 | (122.47, | (116.60, | (-0.21, | <0.001 | (245.75, | 73.37 (72.68, | (-4.50, | <0.001 | 4.19 (4.04, | 1.27 (1.18, | (-4.46, | <0.001 |
| Pacific          | 21.66)        | 19.85)  | -0.28)  |        | 124.14)  | 118.34)  | -0.11)  |        | 248.12)  | 74.07)        | -3.70)  |        | 4.35)       | 1.36)       | -3.69)  |        |
|                  |               | 20.64   | -0.32   | <0.001 | 187.74   | 174.50   | -0.24   | <0.001 | 531.71   | 173.40        | -3.84   | <0.001 | 9.58 (9.31, | 3.04 (2.88, | -3.93   | <0.001 |
| Central Europe   | 22.62 (22.20, |         |         |        |          |          |         |        |          |               |         |        |             |             |         |        |

| Region               | 2019                 |                      | 2020                 |                       | 2021                    |                         | 2022                 |                       | 2023                    |                         | 2024                 |                       | 2025                 |                      |                      |                       |                       |                |
|----------------------|----------------------|----------------------|----------------------|-----------------------|-------------------------|-------------------------|----------------------|-----------------------|-------------------------|-------------------------|----------------------|-----------------------|----------------------|----------------------|----------------------|-----------------------|-----------------------|----------------|
|                      | Mean                 | 95% CI               | Mean                 | 95% CI                | Mean                    | 95% CI                  | Mean                 | 95% CI                | Mean                    | 95% CI                  | Mean                 | 95% CI                | Mean                 | 95% CI               |                      |                       |                       |                |
| Andean Latin America | 23.05                | (20.19, 21.10)       | -0.34                | (-0.34, -0.30)        | 186.54                  | (173.23, 188.95)        | -0.27                | (-0.27, -0.22)        | 529.70                  | (529.70, 533.73)        | -4.22                | (-4.22, -3.46)        | 9.85                 | (9.85, 10.86)        | 3.21                 | (3.21, 3.53)          | -4.33                 | (-4.33, -3.53) |
|                      | 10.31 (9.78, 10.86)  | 10.32 (9.92, 10.72)  | 0.01 (-0.02, 0.04)   | 0.593 (-0.02, 0.04)   | 83.72 (82.16, 85.31)    | 87.14 (85.99, 88.30)    | 0.14 (0.12, 0.17)    | <0.001 (0.12, 0.17)   | 380.24 (377.01, 383.49) | 222.19 (220.37, 224.03) | -1.81 (-2.38, -1.23) | <0.001 (-2.38, -1.23) | 6.51 (6.09, 6.95)    | 3.76 (3.53, 4.01)    | -1.84 (-2.42, -1.26) | <0.001 (-2.42, -1.26) | <0.001 (-2.42, -1.26) |                |
|                      | 59.63 (58.34, 60.95) | 61.73 (60.59, 62.88) | 0.13 (0.10, 0.16)    | <0.001 (0.10, 0.16)   | 295.98 (293.02, 298.97) | 295.79 (293.28, 298.31) | -0.00 (-0.01, 0.00)  | 0.098 (-0.01, 0.00)   | 433.93 (430.37, 437.51) | 365.49 (362.71, 368.29) | -0.57 (-0.85, -0.30) | <0.001 (-0.85, -0.30) | 7.65 (7.18, 8.14)    | 6.42 (6.05, 6.80)    | -0.59 (-0.89, -0.29) | <0.001 (-0.89, -0.29) | <0.001 (-0.89, -0.29) |                |
|                      | 17.45 (16.86, 18.06) | 16.27 (15.78, 16.77) | -0.24 (-0.26, -0.22) | <0.001 (-0.26, -0.22) | 95.72 (94.31, 97.14)    | 93.11 (91.94, 94.28)    | -0.10 (-0.11, -0.09) | <0.001 (-0.11, -0.09) | 286.90 (284.46, 289.35) | 134.56 (133.16, 135.98) | -2.60 (-2.82, -2.37) | <0.001 (-2.82, -2.37) | 5.06 (4.74, 5.39)    | 2.35 (2.17, 2.55)    | -2.59 (-2.77, -2.42) | <0.001 (-2.77, -2.42) | <0.001 (-2.77, -2.42) |                |
| Caribbean            | 26.02 (23.99, 28.19) | 26.44 (25.05, 27.88) | 0.06 (0.04, 0.07)    | <0.001 (0.04, 0.07)   | 196.59 (190.78, 202.53) | 201.22 (197.31, 205.19) | 0.08 (0.07, 0.09)    | <0.001 (0.07, 0.09)   | 758.08 (746.65, 769.66) | 824.73 (816.81, 832.71) | 0.26 (0.14, 0.37)    | <0.001 (0.14, 0.37)   | 13.65 (12.15, 15.30) | 14.80 (13.75, 15.90) | 0.25 (0.13, 0.36)    | <0.001 (0.13, 0.36)   | <0.001 (0.13, 0.36)   |                |
|                      | 53.63 (52.07, 55.22) | 47.34 (46.03, 48.69) | -0.44 (-0.49, -0.39) | <0.001 (-0.49, -0.39) | 243.83 (240.52, 247.18) | 229.94 (227.07, 232.83) | -0.24 (-0.43, -0.05) | 0.014 (-0.43, -0.05)  | 182.58 (179.72, 185.48) | 85.04 (83.31, 86.81)    | -2.59 (-2.97, -2.21) | <0.001 (-2.97, -2.21) | 3.26 (2.89, 3.67)    | 1.52 (1.30, 1.78)    | -2.59 (-3.00, -2.17) | <0.001 (-3.00, -2.17) | <0.001 (-3.00, -2.17) |                |
|                      | 21.05 (20.96, 21.14) | 21.52 (21.44, 21.59) | 0.08 (0.06, 0.09)    | <0.001 (0.06, 0.09)   | 155.55 (155.31, 155.80) | 158.60 (158.40, 158.80) | 0.07 (0.03, 0.11)    | <0.001 (0.03, 0.11)   | 312.10 (311.76, 312.44) | 237.88 (237.63, 238.13) | -0.91 (-1.16, -0.66) | <0.001 (-1.16, -0.66) | 5.34 (5.30, 5.39)    | 4.07 (4.04, 4.10)    | -0.91 (-1.16, -0.66) | <0.001 (-1.16, -0.66) | <0.001 (-1.16, -0.66) |                |
| <b>SDI category</b>  |                      |                      |                      |                       |                         |                         |                      |                       |                         |                         |                      |                       |                      |                      |                      |                       |                       |                |
| High                 | 26.42 (26.17, 26.67) | 26.69 (26.45, 26.94) | 0.04 (-0.02, 0.09)   | 0.198 (-0.02, 0.09)   | 160.39 (159.78, 161.00) | 177.64 (177.03, 178.27) | 0.34 (0.22, 0.46)    | <0.001 (0.22, 0.46)   | 108.60 (108.09, 109.10) | 70.80 (70.41, 71.20)    | -1.47 (-1.78, -1.15) | <0.001 (-1.78, -1.15) | 1.84 (1.78, 1.91)    | 1.21 (1.16, 1.27)    | -1.44 (-1.74, -1.13) | <0.001 (-1.74, -1.13) | <0.001 (-1.74, -1.13) |                |
|                      | 19.92 (19.74, 20.10) | 19.58 (19.41, 19.74) | -0.06 (-0.08, -0.03) | <0.001 (-0.08, -0.03) | 175.01 (174.48, 175.55) | 181.52 (181.03, 182.02) | 0.12 (0.09, 0.16)    | <0.001 (0.09, 0.16)   | 226.06 (225.46, 226.67) | 141.38 (140.93, 141.83) | -1.61 (-2.14, -1.09) | <0.001 (-2.14, -1.09) | 3.87 (3.79, 3.95)    | 2.38 (2.32, 2.44)    | -1.68 (-2.20, -1.16) | <0.001 (-2.20, -1.16) | <0.001 (-2.20, -1.16) |                |
| Middle               | 19.54 (19.39, 19.69) | 20.91 (20.78, 21.04) | 0.24 (0.23, 0.24)    | <0.001 (0.23, 0.24)   | 161.17 (160.73, 161.61) | 167.29 (166.93, 167.65) | 0.13 (0.11, 0.15)    | <0.001 (0.11, 0.15)   | 370.19 (369.54, 370.84) | 257.32 (256.87, 257.78) | -1.21 (-1.54, -0.87) | <0.001 (-1.54, -0.87) | 6.34 (6.26, 6.43)    | 4.37 (4.31, 4.43)    | -1.23 (-1.55, -0.91) | <0.001 (-1.55, -0.91) | <0.001 (-1.55, -0.91) |                |
|                      | 20.59 (20.39, 20.80) | 21.28 (21.13, 21.43) | 0.11 (0.11, 0.11)    | <0.001 (0.11, 0.11)   | 135.74 (135.21, 135.74) | 140.39 (139.99, 140.39) | 0.12 (0.10, 0.12)    | <0.001 (0.10, 0.12)   | 479.85 (478.89, 479.85) | 363.32 (362.69, 363.32) | -0.94 (-1.23, -0.65) | <0.001 (-1.23, -0.65) | 8.26 (8.14, 8.39)    | 6.29 (6.21, 6.37)    | -0.93 (-1.22, -0.64) | <0.001 (-1.22, -0.64) | <0.001 (-1.22, -0.64) |                |
| Low-middle           | 20.59 (20.39, 20.80) | 21.28 (21.13, 21.43) | 0.11 (0.11, 0.11)    | <0.001 (0.11, 0.11)   | 135.74 (135.21, 135.74) | 140.39 (139.99, 140.39) | 0.12 (0.10, 0.12)    | <0.001 (0.10, 0.12)   | 479.85 (478.89, 479.85) | 363.32 (362.69, 363.32) | -0.94 (-1.23, -0.65) | <0.001 (-1.23, -0.65) | 8.26 (8.14, 8.39)    | 6.29 (6.21, 6.37)    | -0.93 (-1.22, -0.64) | <0.001 (-1.22, -0.64) | <0.001 (-1.22, -0.64) |                |

|                              |                      |                |                |        |                      |                  |                |        |                  |                  |                |        |                |             |                |
|------------------------------|----------------------|----------------|----------------|--------|----------------------|------------------|----------------|--------|------------------|------------------|----------------|--------|----------------|-------------|----------------|
|                              |                      | 21.44)         | 0.12)          |        | 136.27)              | 140.78)          | 0.14)          |        | 480.82)          | 363.95)          | -0.65)         |        |                |             | -0.63)         |
| Low                          | 21.60 (21.29, 21.92) | 22.36          | 0.12           |        | 115.73               | 119.67           | 0.12           |        | 319.32           | 250.14           | -0.83          |        | 5.56 (5.40,    | 4.37 (4.28, | -0.81          |
|                              |                      | (22.15, 22.57) | (0.11, 0.13)   | <0.001 | (114.99, 116.47)     | (119.17, 120.16) | (0.10, 0.14)   | <0.001 | (318.12, 320.52) | (249.44, 250.83) | (-1.00, -0.65) | <0.001 | 5.72)          | 4.46)       | (-0.99, -0.63) |
| <b>21 GBD region</b>         |                      |                |                |        |                      |                  |                |        |                  |                  |                |        |                |             |                |
| South Asia                   | 21.53 (21.32, 21.74) | 22.01          | 0.07           |        | 137.18               | 143.79           | 0.16           |        | 562.94           | 434.26           | -0.92          |        | 9.64 (9.50,    | 7.51 (7.42, | -0.89          |
|                              |                      | (21.86, 22.16) | (0.06, 0.09)   | <0.001 | (136.64, 137.71)     | (143.40, 144.18) | (0.13, 0.19)   | <0.001 | (561.89, 564.00) | (433.59, 434.94) | (-1.42, -0.42) | <0.001 | 9.78)          | 7.60)       | (-1.41, -0.37) |
| East Asia                    | 16.15 (16.00, 16.31) | 17.26          | 0.23           |        | 190.87               | 215.69           | 0.42           |        | 257.94           | 139.10           | -2.14          |        | 4.37 (4.29,    | 2.27 (2.21, | -2.29          |
|                              |                      | (17.10, 17.42) | (0.22, 0.25)   | <0.001 | (190.34, 191.41)     | (215.15, 216.23) | (0.40, 0.43)   | <0.001 | (257.32, 258.56) | (138.66, 139.55) | (-2.91, -1.37) | <0.001 | 4.45)          | 2.33)       | (-3.05, -1.52) |
| North Africa and Middle East | 31.80 (31.34, 32.26) | 31.40          | -0.04          |        | 209.14               | 206.14           | -0.04          |        | 724.08           | 406.55           | -1.92          |        | 12.50          | 6.98 (6.83, | -1.95          |
|                              |                      | (31.09, 31.71) | (-0.05, -0.04) | <0.001 | (207.93, 210.35)     | (205.35, 206.93) | (-0.11, 0.02)  | 0.206  | (721.90, 726.27) | (405.44, 407.67) | (-2.04, -1.80) | <0.001 | (12.21, 12.79) | 7.12)       | (-2.06, -1.83) |
| Western Sub-Saharan Africa   | 19.08 (18.60, 19.57) | 20.57          | 0.26           |        | 95.01 (93.89, 96.14) | 102.04           | 0.26           |        | 150.50           | 124.82           | -0.64          |        | 2.62 (2.44,    | 2.16 (2.06, | -0.66          |
|                              |                      | (20.26, 20.89) | (0.25, 0.27)   | <0.001 |                      | (101.33, 102.76) | (0.21, 0.30)   | <0.001 | (149.12, 151.88) | (124.05, 125.59) | (-0.92, -0.36) | <0.001 | 2.81)          | 2.26)       | (-0.93, -0.39) |
| Southeast Asia               | 15.47 (15.21, 15.73) | 16.66          | 0.26           |        | 115.33               | 126.00           | 0.32           |        | 365.16           | 268.71           | -1.06          |        | 6.34 (6.17,    | 4.63 (4.51, | -1.09          |
|                              |                      | (16.44, 16.88) | (0.24, 0.28)   | <0.001 | (114.62, 116.04)     | (125.41, 126.59) | (0.24, 0.41)   | <0.001 | (363.91, 366.40) | (267.84, 269.58) | (-1.27, -0.85) | <0.001 | 6.50)          | 4.74)       | (-1.30, -0.87) |
| Eastern Sub-Saharan Africa   | 19.42 (18.93, 19.92) | 20.16          | 0.13           |        | 92.08 (90.98, 93.20) | 95.46            | 0.13           |        | 169.85           | 120.20           | -1.17          |        | 2.91 (2.72,    | 2.04 (1.94, | -1.21          |
|                              |                      | (19.84, 20.49) | (0.11, 0.14)   | <0.001 |                      | (94.74, 96.19)   | (0.12, 0.14)   | <0.001 | (168.41, 171.31) | (119.42, 120.98) | (-1.28, -1.06) | <0.001 | 3.11)          | 2.15)       | (-1.32, -1.10) |
| Central Latin America        | 21.77 (21.26, 22.29) | 18.85          | -0.48          |        | 148.27               | 130.79           | -0.43          |        | 234.68           | 144.50           | -1.59          |        | 4.05 (3.82,    | 2.46 (2.33, | -1.64          |
|                              |                      | (18.48, 19.23) | (-0.52, -0.44) | <0.001 | (146.89, 149.67)     | (129.80, 131.78) | (-0.46, -0.40) | <0.001 | (232.98, 236.39) | (143.46, 145.54) | (-2.21, -0.97) | <0.001 | 4.28)          | 2.60)       | (-2.25, -1.02) |
| Tropical Latin America       | 13.14 (12.74, 13.55) | 11.89          | -0.34          |        | 92.16 (91.07, 93.26) | 90.33            | -0.07          |        | 251.03           | 120.41           | -2.46          |        | 4.46 (4.23,    | 2.10 (1.98, | -2.52          |
|                              |                      | (11.57, 12.21) | (-0.44, -0.25) | <0.001 |                      | (89.49, 91.18)   | (-0.09, -0.05) | <0.001 | (249.24, 252.84) | (119.42, 121.39) | (-2.71, -2.21) | <0.001 | 4.71)          | 2.24)       | (-2.77, -2.27) |
| Central Sub-Saharan Africa   | 23.76 (22.77, 24.79) | 22.88          | -0.14          |        | 104.19               | 100.82           | -0.11          |        | 161.96           | 130.32           | -0.72          |        | 2.84 (2.50,    | 2.28 (2.08, | -0.73          |
|                              |                      | (22.27, 23.51) | (-0.16, -0.11) | <0.001 | (102.04, 106.37)     | (99.49, 102.17)  | (-0.12, -0.10) | <0.001 | (159.32, 164.63) | (128.83, 131.83) | (-0.87, -0.56) | <0.001 | 3.21)          | 2.49)       | (-0.88, -0.57) |

|                  |               |         |         |        |               |          |         |        |               |               |         |        |             |             |         |        |
|------------------|---------------|---------|---------|--------|---------------|----------|---------|--------|---------------|---------------|---------|--------|-------------|-------------|---------|--------|
| Western Europe   | 28.39 (28.00, | 26.62   | -0.21   |        | 179.68        | 186.39   | 0.12    |        | 79.76 (79.11, | 30.28 (29.88, | -3.32   |        | 1.37 (1.28, | 0.51 (0.46, | -3.37   |        |
|                  | 28.78)        | (26.23, | (-0.26, | <0.001 | (178.72,      | (185.39, | (0.09,  | <0.001 | 80.41)        | 30.69)        | (-3.54, | <0.001 | 1.45)       | 0.56)       | (-3.52, | <0.001 |
|                  |               | 27.01)  | -0.16)  |        | 180.65)       | 187.39)  | 0.16)   |        |               |               | -3.10)  |        | 1.45)       | 0.56)       | -3.21)  |        |
| High-income      | 30.34 (29.90, | 32.56   | 0.27    |        | 153.71        | 186.84   | 0.67    |        | 98.17 (97.39, | 89.74 (89.01, | -0.28   |        | 1.70 (1.59, | 1.56 (1.47, | -0.27   |        |
| North America    | 30.78)        | (32.12, | (0.18,  | <0.001 | (152.73,      | (185.79, | (0.59,  | <0.001 | 98.96)        | 90.47)        | (-0.65, | 0.142  | 1.80)       | 1.66)       | (-0.64, | 0.159  |
|                  |               | 33.02)  | 0.35)   |        | 154.69)       | 187.90)  | 0.76)   |        |               |               | 0.09)   |        | 1.80)       | 1.66)       | 0.11)   |        |
| Central Asia     | 29.59 (28.69, | 28.63   | -0.11   |        | 190.93        | 182.44   | -0.14   |        | 340.58        | 366.39        | 0.23    |        | 5.93 (5.53, | 6.35 (6.00, | 0.22    |        |
|                  | 30.51)        | (27.88, | (-0.12, | <0.001 | (188.58,      | (180.55, | (-0.19, | <0.001 | (337.47,      | (363.70,      | (-0.15, | 0.237  | 6.36)       | 6.72)       | (-0.18, | 0.287  |
|                  |               | 29.39)  | -0.11)  |        | 193.30)       | 184.35)  | -0.10)  |        | 343.71)       | 369.10)       | 0.62)   |        | 6.36)       | 6.72)       | 0.61)   |        |
| Eastern Europe   | 27.68 (27.20, | 29.62   | 0.22    |        | 184.08        | 202.33   | 0.35    |        | 154.64        | 175.54        | 0.65    |        | 2.72 (2.58, | 3.09 (2.93, | 0.66    |        |
|                  | 28.17)        | (29.07, | (0.19,  | <0.001 | (182.86,      | (200.95, | (0.21,  | <0.001 | (153.51,      | (174.24,      | (-0.52, | 0.277  | 2.88)       | 3.27)       | (-0.52, | 0.277  |
|                  |               | 30.18)  | 0.26)   |        | 185.31)       | 203.71)  | 0.49)   |        | 155.77)       | 176.84)       | 1.82)   |        | 2.88)       | 3.27)       | 1.85)   |        |
| Southern         | 28.81 (27.76, | 26.11   | -0.35   |        | 117.68        | 105.54   | -0.37   |        | 223.29        | 103.70        | -2.47   |        | 3.94 (3.55, | 1.80 (1.60, | -2.53   |        |
| Sub-Saharan      | 29.89)        | (25.35, | (-0.40, | <0.001 | (115.49,      | (104.00, | (-0.40, | <0.001 | (220.32,      | (102.18,      | (-4.47, | 0.018  | 4.36)       | 2.01)       | (-4.55, | 0.016  |
| Africa           |               | 26.89)  | -0.30)  |        | 119.89)       | 107.09)  | -0.34)  |        | 226.30)       | 105.24)       | -0.44)  |        | 4.36)       | 2.01)       | -0.47)  |        |
| High-income Asia | 17.20 (16.76, | 16.46   | -0.15   |        | 119.22        | 121.37   | 0.09    |        | 139.15        |               | -5.78   |        | 2.31 (2.15, | 0.42 (0.35, | -5.81   |        |
|                  | 17.66)        | (15.97, | (-0.16, | <0.001 | (118.05,      | (120.09, | (0.03,  | 0.005  | (137.89,      | 25.22 (24.64, | (-6.23, | <0.001 | 2.47)       | 0.50)       | (-6.36, | <0.001 |
| Pacific          |               | 16.96)  | -0.14)  |        | 120.39)       | 122.67)  | 0.14)   |        | 140.43)       | 25.82)        | -5.33)  |        | 2.47)       | 0.50)       | -5.26)  |        |
| Central Europe   | 16.82 (16.30, | 15.76   | -0.23   |        | 157.67        | 153.78   | -0.08   |        | 182.53        |               | -3.43   |        | 3.20 (2.98, | 1.14 (1.00, | -3.55   |        |
|                  | 17.36)        | (15.19, | (-0.28, | <0.001 | (156.10,      | (152.07, | (-0.13, | 0.010  | (180.84,      | 67.47 (66.33, | (-3.77, | <0.001 | 3.44)       | 1.30)       | (-3.91, | <0.001 |
|                  |               | 16.34)  | -0.18)  |        | 159.25)       | 155.51)  | -0.02)  |        | 184.24)       | 68.63)        | -3.09)  |        | 3.44)       | 1.30)       | -3.19)  |        |
| Andean Latin     | 7.61 (6.99,   | 7.50    | -0.05   |        | 66.76 (64.82, | 68.14    | 0.08    |        | 283.71        | 120.22        | -3.01   |        | 4.84 (4.34, | 2.02 (1.78, | -3.07   |        |
| America          | 8.28)         | (7.04,  | (-0.08, | 0.003  | 68.74)        | (66.71,  | (0.02,  | 0.010  | (279.83,      | (118.32,      | (-3.66, | <0.001 | 5.38)       | 2.28)       | (-3.73, | <0.001 |
|                  |               | 7.99)   | -0.02)  |        | 69.59)        | 69.59)   | 0.14)   |        | 287.64)       | 122.14)       | -2.36)  |        | 5.38)       | 2.28)       | -2.40)  |        |
| Caribbean        | 55.08 (53.36, | 56.50   | 0.09    |        | 272.67        | 267.31   | -0.07   |        | 321.05        | 284.02        | -0.38   |        | 5.62 (5.07, | 4.94 (4.49, | -0.40   |        |
|                  | 56.85)        | (54.98, | (0.08,  | <0.001 | (268.72,      | (263.98, | (-0.09, | <0.001 | (316.81,      | (280.58,      | (-0.61, | 0.001  | 6.22)       | 5.42)       | (-0.64, | 0.001  |
|                  |               | 58.06)  | 0.10)   |        | 276.67)       | 270.68)  | -0.04)  |        | 325.34)       | 287.49)       | -0.15)  |        | 6.22)       | 5.42)       | -0.16)  |        |
| Southern Latin   | 13.70 (12.96, | 12.57   | -0.29   |        | 86.77 (84.90, | 84.64    | -0.07   |        | 157.73        |               | -3.15   |        | 2.72 (2.40, | 1.07 (0.90, | -3.18   |        |
| America          | 14.46)        | (11.97, | (-0.31, | <0.001 | 88.68)        | (83.08,  | (-0.11, | <0.001 | (155.21,      | 62.69 (61.34, | (-3.60, | <0.001 | 3.08)       | 1.27)       | (-3.61, | <0.001 |
|                  |               | 13.19)  | -0.28)  |        |               | 86.22)   | -0.04)  |        | 160.28)       | 64.07)        | -2.69)  |        | 3.08)       | 1.27)       | -2.74)  |        |
| Oceania          | 20.67 (18.11, | 21.07   | 0.07    |        | 163.53        | 166.25   | 0.07    |        | 324.72        | 388.99        | 0.62    |        | 5.71 (4.38, | 6.84 (5.85, | 0.62    |        |
|                  | 23.51)        | (19.33, | (0.05,  | <0.001 | (155.99,      | (161.24, | (0.01,  | 0.033  | (314.17,      | (381.35,      | (0.49,  | <0.001 | 7.32)       | 7.94)       | (0.49,  | <0.001 |
|                  |               | 22.93)  | 0.10)   |        | 171.35)       | 171.38)  | 0.13)   |        | 335.54)       | 396.75)       | 0.76)   |        | 7.32)       | 7.94)       | 0.76)   |        |

|                              |               |         |         |        |          |          |         |        |               |               |         |        |             |             |         |        |
|------------------------------|---------------|---------|---------|--------|----------|----------|---------|--------|---------------|---------------|---------|--------|-------------|-------------|---------|--------|
| Australasia                  | 23.64 (22.19, | 18.98   | -0.77   |        | 143.41   | 123.50   | -0.50   |        | 69.31 (66.83, | 30.93 (29.46, | -2.70   |        | 1.20 (0.90, | 0.54 (0.36, | -2.68   |        |
|                              | 25.17)        | (17.81, | (-0.81, | <0.001 | (139.83, | (120.53, | (-0.56, | <0.001 | 71.87)        | 32.45)        | (-3.11, | <0.001 | 1.58)       | 0.78)       | (-3.14, | <0.001 |
|                              |               | 20.21)  | -0.73)  |        | 147.06)  | 126.52)  | -0.44)  |        |               |               | -2.28)  |        |             | 1.58)       | 0.78)   | -2.21) |
| <b>Men</b>                   |               |         |         |        |          |          |         |        |               |               |         |        |             |             |         |        |
| Global                       | 31.51 (31.40, | 31.06   | -0.05   |        | 199.09   | 201.90   | 0.05    |        | 603.18        | 564.60        | -0.18   |        | 10.63       | 9.92 (9.87, | -0.19   |        |
|                              | 31.62)        | (30.97, | (-0.06, | <0.001 | (198.82, | (201.68, | (0.04,  | <0.001 | (602.70,      | (564.22,      | (-0.55, | 0.318  | (10.57,     | 9.97)       | (-0.56, | 0.309  |
|                              |               | 31.15)  | -0.04)  |        | 199.37)  | 202.13)  | 0.06)   |        | 603.65)       | 564.98)       | 0.18)   |        | 10.69)      |             | 0.18)   |        |
| <b>SDI category</b>          |               |         |         |        |          |          |         |        |               |               |         |        |             |             |         |        |
| High                         | 39.79 (39.49, | 35.25   | -0.43   |        | 194.29   | 194.00   | -0.00   |        | 354.52        | 206.83        | -1.86   |        | 6.29 (6.17, | 3.65 (3.57, | -1.88   |        |
|                              | 40.09)        | (34.98, | (-0.48, | <0.001 | (193.63, | (193.38, | (-0.05, | 0.933  | (353.63,      | (206.19,      | (-2.07, | <0.001 | 6.41)       | 3.74)       | (-2.11, | <0.001 |
|                              |               | 35.52)  | -0.37)  |        | 194.95)  | 194.62)  | 0.04)   |        | 355.41)       | 207.48)       | -1.64)  |        |             |             | -1.65)  |        |
| High-middle                  | 30.52 (30.30, | 27.58   | -0.36   |        | 210.30   | 204.70   | -0.10   |        | 675.22        | 484.09        | -1.10   |        | 11.99       | 8.51 (8.40, | -1.13   |        |
|                              | 30.74)        | (27.39, | (-0.39, | <0.001 | (209.72, | (204.20, | (-0.12, | <0.001 | (674.20,      | (483.30,      | (-1.67, | <0.001 | (11.85,     | 8.61)       | (-1.70, | <0.001 |
|                              |               | 27.77)  | -0.33)  |        | 210.87)  | 205.21)  | -0.08)  |        | 676.25)       | 484.89)       | -0.53)  |        | 12.13)      |             | -0.56)  |        |
| Middle                       | 28.93 (28.75, | 30.63   | 0.20    |        | 211.04   | 216.86   | 0.10    |        | 622.54        | 632.82        | 0.11    |        | 10.88       | 11.06       | 0.12    |        |
|                              | 29.11)        | (30.47, | (0.17,  | <0.001 | (210.55, | (216.45, | (0.07,  | <0.001 | (621.70,      | (632.11,      | (-0.10, | 0.298  | (10.76,     | (10.96,     | (-0.10, | 0.284  |
|                              |               | 30.78)  | 0.23)   |        | 211.53)  | 217.27)  | 0.13)   |        | 623.37)       | 633.52)       | 0.33)   |        | 10.99)      | 11.15)      | 0.33)   |        |
| Low-middle                   | 29.54 (29.30, | 30.82   | 0.15    |        | 178.22   | 189.43   | 0.21    |        | 726.78        | 751.24        | 0.18    |        | 12.85       | 13.33       | 0.20    |        |
|                              | 29.78)        | (30.64, | (0.13,  | <0.001 | (177.62, | (188.97, | (0.20,  | <0.001 | (725.59,      | (750.33,      | (-0.31, | 0.469  | (12.70,     | (13.20,     | (-0.32, | 0.453  |
|                              |               | 31.01)  | 0.16)   |        | 178.82)  | 189.89)  | 0.22)   |        | 727.97)       | 752.15)       | 0.68)   |        | 13.01)      | 13.45)      | 0.72)   |        |
| Low                          | 31.65 (31.27, | 33.55   | 0.20    |        | 175.03   | 189.36   | 0.28    |        | 510.18        | 533.96        | 0.19    |        | 9.04 (8.83, | 9.43 (9.29, | 0.18    |        |
|                              | 32.04)        | (33.29, | (0.19,  | <0.001 | (174.11, | (188.72, | (0.21,  | <0.001 | (508.62,      | (532.91,      | (-0.00, | 0.055  | 9.25)       | 9.57)       | (-0.01, | 0.067  |
|                              |               | 33.81)  | 0.21)   |        | 175.95)  | 189.99)  | 0.36)   |        | 511.73)       | 535.00)       | 0.38)   |        |             |             | 0.38)   |        |
| <b>21 GBD region</b>         |               |         |         |        |          |          |         |        |               |               |         |        |             |             |         |        |
| South Asia                   | 29.66 (29.43, | 30.69   | 0.12    |        | 167.31   | 179.15   | 0.23    |        | 878.71        | 923.18        | 0.24    |        | 15.58       | 16.41       | 0.26    |        |
|                              | 29.90)        | (30.51, | (0.10,  | <0.001 | (166.74, | (178.72, | (0.20,  | <0.001 | (877.41,      | (922.21,      | (-0.39, | 0.452  | (15.40,     | (16.29,     | (-0.39, | 0.435  |
|                              |               | 30.87)  | 0.14)   |        | 167.89)  | 179.58)  | 0.27)   |        | 880.01)       | 924.16)       | 0.87)   |        | 15.75)      | 16.55)      | 0.92)   |        |
| East Asia                    | 23.63 (23.45, | 22.30   | -0.19   |        | 232.38   | 230.44   | -0.03   |        | 445.83        | 455.19        | 0.14    |        | 7.64 (7.54, | 7.86 (7.76, | 0.17    |        |
|                              | 23.81)        | (22.13, | (-0.27, | <0.001 | (231.80, | (229.90, | (-0.08, | 0.338  | (445.04,      | (454.41,      | (-0.59, | 0.704  | 7.75)       | 7.97)       | (-0.58, | 0.657  |
|                              |               | 22.47)  | -0.12)  |        | 232.96)  | 230.98)  | 0.03)   |        | 446.62)       | 455.97)       | 0.88)   |        |             |             | 0.92)   |        |
| North Africa and Middle East | 45.30 (44.76, | 45.88   | 0.05    |        | 298.79   | 308.35   | 0.13    |        | 1107.62       | 670.23        | -1.69   |        | 19.52       | 11.62       | -1.75   |        |
|                              | 45.84)        | (45.53, | (0.02,  | <0.001 | (297.39, | (307.44, | (-0.01, | 0.062  | (1104.96,     | (668.87,      | (-1.81, | <0.001 | (19.17,     | (11.44,     | (-1.87, | <0.001 |
|                              |               | 46.24)  | 0.07)   |        | 300.20)  | 309.27)  | 0.27)   |        | 1110.29)      | 671.59)       | -1.57)  |        | 19.88)      | 11.80)      | -1.64)  |        |

|                |               |         |         |        |          |          |         |        |          |          |         |        |             |             |         |        |
|----------------|---------------|---------|---------|--------|----------|----------|---------|--------|----------|----------|---------|--------|-------------|-------------|---------|--------|
| Western        |               | 33.06   | 0.29    |        | 171.46   | 189.11   | 0.36    |        | 258.50   | 267.09   | 0.11    |        |             |             |         |        |
| Sub-Saharan    | 30.39 (29.78, | (32.64, | (0.27,  | <0.001 | (169.95, | (188.09, | (0.28,  | <0.001 | (256.67, | (265.89, | (-0.12, | 0.350  | 4.56 (4.32, | 4.69 (4.53, | (-0.14, | 0.449  |
| Africa         | 31.02)        | 33.48)  | 0.32)   |        | 172.97)  | 190.14)  | 0.43)   |        | 260.34)  | 268.29)  | 0.33)   |        | 4.81)       | 4.86)       | 0.33)   |        |
|                |               | 27.33   | 0.05    |        | 178.78   | 186.72   | 0.16    |        | 557.68   | 647.83   | 0.56    |        |             | 11.31       | 0.54    |        |
| Southeast Asia | 26.90 (26.56, | (27.06, | (0.03,  | <0.001 | (177.88, | (186.01, | (0.13,  | <0.001 | (556.11, | (646.50, | (0.21,  | 0.002  | 9.79 (9.59, | (11.13,     | (0.19,  | 0.003  |
|                | 27.25)        | 27.61)  | 0.08)   |        | 179.68)  | 187.44)  | 0.18)   |        | 559.25)  | 649.17)  | 0.92)   |        | 10.01)      | 11.49)      | 0.90)   |        |
| Eastern        |               | 33.00   | 0.25    |        | 172.94   | 188.97   | 0.32    |        | 348.07   | 327.66   | -0.21   |        |             |             | -0.23   |        |
| Sub-Saharan    | 30.78 (30.14, | (32.57, | (0.22,  | <0.001 | (171.36, | (187.92, | (0.25,  | <0.001 | (345.88, | (326.31, | (-0.36, | 0.008  | 6.07 (5.78, | 5.68 (5.50, | (-0.38, | 0.004  |
| Africa         | 31.43)        | 33.43)  | 0.27)   |        | 174.53)  | 190.03)  | 0.38)   |        | 350.26)  | 329.02)  | -0.05)  |        | 6.37)       | 5.87)       | (-0.07) |        |
|                |               | 28.66   | -0.17   |        | 154.14   | 156.20   | 0.04    |        | 451.95   | 403.60   | -0.38   |        |             |             | -0.40   |        |
| Central Latin  | 30.07 (29.44, | (28.19, | (-0.20, | <0.001 | (152.67, | (155.08, | (0.02,  | 0.002  | (449.49, | (401.81, | (-0.93, | 0.170  | 7.90 (7.58, | 7.03 (6.80, | (-0.94, | 0.158  |
| America        | 30.71)        | 29.14)  | -0.13)  |        | 155.61)  | 157.32)  | 0.07)   |        | 454.41)  | 405.39)  | 0.16)   |        | 8.24)       | 7.27)       | (-0.15) |        |
|                |               | 20.51   | -0.44   |        | 177.75   | 176.93   | -0.02   |        | 603.65   | 338.10   | -1.98   |        | 10.80       |             | -2.08   |        |
| Tropical Latin | 23.34 (22.79, | (20.10, | (-0.49, | <0.001 | (176.20, | (175.73, | (-0.04, | 0.122  | (600.79, | (336.43, | (-2.23, | <0.001 | (10.42,     | 5.88 (5.66, | (-2.35, | <0.001 |
| America        | 23.90)        | 20.93)  | -0.39)  |        | 179.32)  | 178.14)  | 0.01)   |        | 606.52)  | 339.78)  | -1.73)  |        | 11.19)      | 6.11)       | (-1.82) |        |
|                |               | 34.49   | -0.08   |        | 163.76   | 161.86   | -0.04   |        | 404.12   | 332.12   | -0.70   |        |             |             | -0.73   |        |
| Central        | 35.32 (34.09, | (33.73, | (-0.09, | <0.001 | (161.02, | (160.16, | (-0.06, | <0.001 | (399.87, | (329.70, | (-0.78, | <0.001 | 7.14 (6.58, | 5.86 (5.54, | (-0.86, | <0.001 |
| Sub-Saharan    | 36.59)        | 35.27)  | -0.08)  |        | 166.55)  | 163.59)  | -0.02)  |        | 408.40)  | 334.54)  | -0.63)  |        | 7.73)       | 6.19)       | (-0.60) |        |
| Africa         |               | 33.47   | -0.66   |        | 195.11   | 176.56   | -0.34   |        | 351.45   | 131.67   | -3.39   |        |             |             | -3.44   |        |
| Western Europe | 40.48 (40.03, | (33.05, | (-0.68, | <0.001 | (194.11, | (175.60, | (-0.40, | <0.001 | (350.11, | (130.84, | (-3.67, | <0.001 | 6.27 (6.09, | 2.34 (2.23, | (-3.70, | <0.001 |
|                | 40.94)        | 33.90)  | -0.64)  |        | 196.11)  | 177.51)  | -0.28)  |        | 352.79)  | 132.49)  | -3.10)  |        | 6.45)       | 2.45)       | (-3.18) |        |
|                |               | 38.49   | -0.55   |        | 193.03   | 184.54   | -0.13   |        | 337.00   | 228.55   | -1.28   |        |             |             | -1.34   |        |
| High-income    | 45.13 (44.60, | (38.01, | (-0.60, | <0.001 | (191.93, | (183.50, | (-0.30, | 0.120  | (335.55, | (227.38, | (-1.75, | <0.001 | 6.06 (5.87, | 4.04 (3.89, | (-1.81, | <0.001 |
| North America  | 45.67)        | 38.97)  | -0.50)  |        | 194.13)  | 185.59)  | 0.03)   |        | 338.45)  | 229.72)  | -0.81)  |        | 6.26)       | 4.20)       | (-0.87) |        |
|                |               | 41.08   | -0.14   |        | 221.87   | 219.41   | -0.03   |        | 1001.18  | 866.74   | -0.52   |        | 18.15       | 15.46       | -0.57   |        |
| Central Asia   | 42.91 (41.80, | (40.19, | (-0.17, | <0.001 | (219.29, | (217.34, | (-0.07, | 0.058  | (995.68, | (862.62, | (-0.98, | 0.028  | (17.41,     | (14.92,     | (-1.04, | 0.018  |
|                | 44.05)        | 41.99)  | -0.12)  |        | 224.48)  | 221.50)  | 0.00)   |        | 1006.71) | 870.88)  | -0.06)  |        | 18.91)      | 16.03)      | (-0.10) |        |
|                |               | 42.99   | -0.12   |        | 184.02   | 179.44   | -0.08   |        | 991.53   | 931.31   | -0.01   |        | 18.06       | 16.76       | -0.05   |        |
| Eastern Europe | 44.66 (44.05, | (42.35, | (-0.17, | <0.001 | (182.80, | (178.16, | (-0.15, | 0.037  | (988.71, | (928.37, | (-1.23, | 0.986  | (17.69,     | (16.37,     | (-1.26, | 0.935  |
|                | 45.27)        | 43.64)  | -0.07)  |        | 185.24)  | 180.72)  | -0.01)  |        | 994.36)  | 934.25)  | 1.22)   |        | 18.45)      | 17.16)      | 1.17)   |        |
| Southern       |               | 42.25   | -0.03   |        | 199.88   | 203.41   | 0.07    |        | 375.51   | 264.89   | -1.34   |        |             |             | -1.42   |        |
| Sub-Saharan    | 42.67 (41.35, | (41.28, | (-0.05, | <0.001 | (196.93, | (201.27, | (0.03,  | <0.001 | (371.44, | (262.44, | (-2.48, | 0.022  | 6.80 (6.26, | 4.70 (4.38, | (-2.61, | 0.021  |
| Africa         | 44.02)        | 43.24)  | -0.02)  |        | 202.86)  | 205.57)  | 0.10)   |        | 379.61)  | 267.35)  | -0.19)  |        | 7.38)       | 5.04)       | (-0.22) |        |

|                          |                       |                      |                      |                      |                         |                         |                         |                      |                         |                            |                            |                      |                   |                      |                      |                      |
|--------------------------|-----------------------|----------------------|----------------------|----------------------|-------------------------|-------------------------|-------------------------|----------------------|-------------------------|----------------------------|----------------------------|----------------------|-------------------|----------------------|----------------------|----------------------|
| High-income Asia Pacific | 25.30 (24.78, 25.84)  | 22.32 (21.79, 22.86) | -0.43 (-0.46, -0.40) | <0.001               | 127.31 (126.13, 128.50) | 113.85 (112.67, 115.04) | -0.38 (-0.41, -0.34)    | <0.001               | 351.57 (349.60, 353.56) | 118.44 (117.22, 119.67)    | -3.71 (-3.95, -3.47)       | <0.001               | 6.03 (5.77, 6.29) | 2.06 (1.91, 2.23)    | -3.63 (-4.03, -3.22) | <0.001               |
|                          | Central Europe        | 28.31 (27.64, 28.98) | 25.34 (24.65, 26.04) | -0.38 (-0.40, -0.36) | <0.001                  | 217.24 (215.43, 219.06) | 194.47 (192.61, 196.34) | -0.38 (-0.40, -0.36) | <0.001                  | 873.57 (869.94, 877.21)    | 275.13 (272.90, 277.37)    | -4.01 (-4.42, -3.61) | <0.001            | 15.82 (15.34, 16.32) | 4.87 (4.58, 5.18)    | -4.09 (-4.51, -3.68) |
| Andean Latin America     |                       | 13.13 (12.28, 14.02) | 13.18 (12.55, 13.82) | 0.01 (-0.06, 0.08)   | 0.840                   | 101.49 (99.02, 104.00)  | 106.71 (104.90, 108.54) | 0.17 (0.16, 0.18)    | <0.001                  | 481.15 (475.94, 486.39)    | 325.12 (321.98, 328.27)    | -1.32 (-1.75, -0.87) | <0.001            | 8.26 (7.59, 8.98)    | 5.53 (5.13, 5.96)    | -1.35 (-1.79, -0.90) |
|                          | Caribbean             | 64.47 (62.55, 66.45) | 67.15 (65.46, 68.87) | 0.14 (0.12, 0.16)    | <0.001                  | 320.80 (316.36, 325.28) | 325.40 (321.66, 329.18) | 0.04 (0.01, 0.07)    | 0.004                   | 553.78 (548.00, 559.61)    | 450.09 (445.69, 454.53)    | -0.68 (-0.90, -0.46) | <0.001            | 9.80 (9.04, 10.61)   | 7.96 (7.38, 8.57)    | -0.69 (-0.90, -0.47) |
| Southern Latin America   |                       | 21.34 (20.40, 22.31) | 20.08 (19.32, 20.87) | -0.21 (-0.22, -0.20) | <0.001                  | 104.99 (102.89, 107.12) | 101.91 (100.18, 103.66) | -0.11 (-0.13, -0.08) | <0.001                  | 420.05 (415.85, 424.28)    | 208.07 (205.59, 210.57)    | -2.40 (-2.67, -2.14) | <0.001            | 7.46 (6.91, 8.05)    | 3.66 (3.34, 4.01)    | -2.43 (-2.79, -2.07) |
|                          | Oceania               | 31.12 (28.03, 34.48) | 31.78 (29.64, 34.04) | 0.07 (0.05, 0.09)    | <0.001                  | 227.99 (219.27, 236.98) | 236.30 (230.30, 242.41) | 0.12 (0.11, 0.13)    | <0.001                  | 1169.62 (1149.74, 1189.77) | 1260.89 (1247.02, 1274.89) | 0.23 (0.11, 0.36)    | <0.001            | 21.19 (18.58, 24.08) | 22.77 (20.93, 24.72) | 0.22 (0.09, 0.35)    |
| Australasia              |                       | 83.85 (81.10, 86.67) | 76.34 (73.98, 78.77) | -0.32 (-0.35, -0.29) | <0.001                  | 345.30 (339.72, 350.95) | 339.42 (334.47, 344.43) | -0.12 (-0.42, 0.18)  | 0.448                   | 296.91 (291.74, 302.15)    | 140.67 (137.50, 143.90)    | -2.54 (-2.99, -2.09) | <0.001            | 5.34 (4.67, 6.09)    | 2.53 (2.12, 3.00)    | -2.55 (-3.01, -2.07) |
|                          | <b>Stroke Overall</b> |                      |                      |                      |                         |                         |                         |                      |                         |                            |                            |                      |                   |                      |                      |                      |
| Global                   | 30.99 (30.91, 31.07)  | 27.48 (27.42, 27.54) | -0.41 (-0.47, -0.35) | <0.001               | 386.75 (386.48, 387.01) | 388.58 (388.36, 388.80) | 0.08 (-0.28, 0.44)      | 0.678                | 424.25 (423.97, 424.53) | 303.96 (303.76, 304.15)    | -1.11 (-1.29, -0.92)       | <0.001               | 6.25 (6.21, 6.28) | 4.20 (4.17, 4.22)    | -1.35 (-1.62, -1.08) | <0.001               |
|                          | <b>SDI category</b>   |                      |                      |                      |                         |                         |                         |                      |                         |                            |                            |                      |                   |                      |                      |                      |
| High                     | 21.03 (20.87, 21.19)  | 19.74 (19.60, 19.89) | -0.22 (-0.26, -0.17) | <0.001               | 316.65 (316.05, 317.26) | 357.70 (357.07, 358.33) | 0.58 (-0.21, 1.39)      | 0.150                | 225.92 (225.41, 226.43) | 144.01 (143.62, 144.41)    | -1.52 (-1.70, -1.33)       | <0.001               | 3.04 (2.98, 3.10) | 1.55 (1.50, 1.59)    | -2.29 (-2.50, -2.09) | <0.001               |
|                          | High-middle           | 32.12 (31.96, 32.28) | 25.49 (25.35, 25.62) | -0.80 (-0.88, -0.72) | <0.001                  | 375.75 (375.21, 376.30) | 345.62 (345.13, 346.12) | -0.24 (-0.45, -0.03) | 0.022                   | 402.46 (401.89, 403.02)    | 257.90 (257.48, 258.32)    | -1.49 (-1.92, -1.05) | <0.001            | 5.81 (5.74, 5.87)    | 3.41 (3.36, 3.46)    | -1.81 (-2.34, -1.27) |



|                              | 2019                       | 2020                 | 2021                 | 2022                 | 2019                    | 2020                    | 2021                    | 2022                    | 2019                    | 2020                    | 2021                    | 2022                    | 2019                 | 2020                | 2021                 | 2022                 |                      |
|------------------------------|----------------------------|----------------------|----------------------|----------------------|-------------------------|-------------------------|-------------------------|-------------------------|-------------------------|-------------------------|-------------------------|-------------------------|----------------------|---------------------|----------------------|----------------------|----------------------|
| Middle                       | 34.20 (34.07, 34.34)       | 29.68 (29.57, 29.79) | -0.48 (-0.56, -0.41) | <0.001               | 414.93 (414.45, 415.41) | 403.29 (402.88, 403.69) | -0.04 (-0.24, 0.17)     | 0.731                   | 492.96 (492.44, 493.49) | 331.71 (331.35, 332.08) | -1.35 (-1.64, -1.06)    | <0.001                  | 7.31 (7.25, 7.38)    | 4.57 (4.53, 4.61)   | -1.60 (-1.95, -1.25) | <0.001               |                      |
|                              | Low-middle                 | 30.89 (30.72, 31.06) | 29.03 (28.91, 29.16) | -0.21 (-0.26, -0.17) | <0.001                  | 387.73 (387.13, 388.34) | 394.68 (394.22, 395.15) | 0.12 (-0.24, 0.48)      | 0.515                   | 481.96 (481.28, 482.64) | 353.41 (352.97, 353.85) | -1.03 (-1.21, -0.84)    | <0.001               | 7.35 (7.27, 7.43)   | 5.13 (5.08, 5.19)    | -1.22 (-1.46, -0.98) | <0.001               |
|                              |                            | Low                  | 34.48 (34.21, 34.77) | 29.48 (29.31, 29.65) | -0.53 (-0.58, -0.48)    | <0.001                  | 427.73 (426.77, 428.70) | 419.12 (418.49, 419.75) | -0.03 (-0.30, 0.24)     | 0.818                   | 457.76 (456.75, 458.77) | 352.18 (351.60, 352.77) | -0.90 (-1.00, -0.78) | <0.001              | 6.93 (6.81, 7.06)    | 5.10 (5.03, 5.17)    | -1.05 (-1.15, -0.95) |
| <b>21 GBD region</b>         |                            |                      |                      |                      |                         |                         |                         |                         |                         |                         |                         |                         |                      |                     |                      |                      |                      |
| South Asia                   | 26.46 (26.31, 26.62)       | 25.96 (25.85, 26.08) | -0.06 (-0.13, 0.01)  | 0.088                | 348.23 (347.65, 348.80) | 357.76 (357.33, 358.18) | 0.15 (-0.24, 0.54)      | 0.443                   | 357.23 (356.65, 357.82) | 281.27 (280.89, 281.65) | -0.79 (-1.03, -0.53)    | <0.001                  | 5.29 (5.21, 5.36)    | 3.96 (3.92, 4.01)   | -0.96 (-1.27, -0.65) | <0.001               |                      |
|                              | East Asia                  | 28.92 (28.78, 29.06) | 23.92 (23.79, 24.05) | -0.68 (-0.73, -0.64) | <0.001                  | 352.72 (352.22, 353.23) | 317.03 (316.56, 317.51) | -0.35 (-0.47, -0.24)    | <0.001                  | 490.29 (489.70, 490.88) | 321.63 (321.16, 322.11) | -1.39 (-1.94, -0.84)    | <0.001               | 7.25 (7.18, 7.33)   | 4.42 (4.37, 4.48)    | -1.61 (-1.90, -1.30) | <0.001               |
| North Africa and Middle East |                            | 39.78 (39.42, 40.14) | 36.01 (35.78, 36.24) | -0.33 (-0.35, -0.31) | <0.001                  | 478.30 (477.07, 479.52) | 473.92 (473.09, 474.75) | 0.02 (-0.25, 0.29)      | 0.889                   | 556.93 (555.62, 558.24) | 376.36 (375.62, 377.10) | -1.33 (-1.51, -1.15)    | <0.001               | 8.26 (8.10, 8.42)   | 5.17 (5.08, 5.25)    | -1.55 (-1.69, -1.41) | <0.001               |
|                              | Western Sub-Saharan Africa | 32.42 (31.98, 32.87) | 28.90 (28.64, 29.17) | -0.38 (-0.41, -0.34) | <0.001                  | 445.47 (443.83, 447.11) | 444.00 (442.97, 445.03) | 0.02 (-0.20, 0.24)      | 0.860                   | 396.04 (394.48, 397.61) | 316.40 (315.52, 317.28) | -0.77 (-0.88, -0.66)    | <0.001               | 5.87 (5.68, 6.06)   | 4.47 (4.36, 4.57)    | -0.92 (-1.01, -0.84) | <0.001               |
| Southeast Asia               |                            | 44.99 (44.68, 45.30) | 40.99 (40.75, 41.23) | -0.31 (-0.33, -0.30) | <0.001                  | 490.81 (489.79, 491.83) | 474.94 (474.13, 475.76) | -0.08 (-0.30, 0.15)     | 0.507                   | 646.91 (645.74, 648.09) | 490.43 (489.60, 491.25) | -0.93 (-1.05, -0.80)    | <0.001               | 9.61 (9.46, 9.75)   | 6.92 (6.82, 7.02)    | -1.09 (-1.20, -0.98) | <0.001               |
|                              | Eastern Sub-Saharan Africa | 37.17 (36.68, 37.67) | 25.90 (25.64, 26.16) | -1.23 (-1.29, -1.18) | <0.001                  | 503.72 (501.96, 505.49) | 471.57 (470.48, 472.67) | -0.19 (-0.47, 0.09)     | 0.184                   | 557.22 (555.34, 559.10) | 362.29 (361.32, 363.26) | -1.47 (-1.59, -1.34)    | <0.001               | 8.50 (8.27, 8.74)   | 5.16 (5.05, 5.28)    | -1.70 (-1.81, -1.60) | <0.001               |
| Central Latin America        |                            | 33.82 (33.36, 34.28) | 25.88 (25.57, 26.20) | -0.92 (-0.96, -0.88) | <0.001                  | 483.29 (481.56, 485.03) | 438.07 (436.77, 439.36) | -0.29 (-0.58, 0.00)     | 0.052                   | 327.70 (326.27, 329.13) | 200.03 (199.16, 200.91) | -1.67 (-1.99, -1.35)    | <0.001               | 4.86 (4.69, 5.04)   | 2.73 (2.63, 2.84)    | -1.94 (-2.25, -1.63) | <0.001               |
|                              | Tropical Latin America     | 52.04 (51.46, 52.62) | 29.47 (29.12, 29.82) | -1.92 (-2.08, -1.76) | <0.001                  | 571.92 (570.02, 573.82) | 451.30 (449.92, 452.68) | -0.80 (-0.91, -0.69)    | <0.001                  | 621.10 (619.10, 623.10) | 235.22 (234.23, 236.21) | -3.27 (-3.41, -3.13)    | <0.001               | 10.12 (9.86, 10.38) | 3.39 (3.27, 3.51)    | -3.68 (-3.86, -3.50) | <0.001               |

|                  |               |         |         |        |          |          |         |        |          |               |         |        |             |             |         |        |
|------------------|---------------|---------|---------|--------|----------|----------|---------|--------|----------|---------------|---------|--------|-------------|-------------|---------|--------|
|                  |               | 29.82)  | -1.76)  |        | 573.83)  | 452.68)  | -0.69)  |        | 623.12)  | 236.21)       | -3.12)  |        |             |             | -3.50)  |        |
| Central          |               | 24.98   | -0.98   |        | 417.75   | 376.96   | -0.32   |        | 442.44   | 310.50        | -1.25   |        |             |             | -1.39   |        |
| Sub-Saharan      | 33.26 (32.42, | (24.52, | (-1.01, | <0.001 | (414.81, | (375.21, | (-0.52, | 0.003  | (439.40, | (308.89,      | (-1.31, | <0.001 | 6.69 (6.31, | 4.49 (4.30, | (-1.47, | <0.001 |
| Africa           | 34.11)        | 25.44)  | -0.94)  |        | 420.70)  | 378.72)  | -0.11)  |        | 445.50)  | 312.11)       | -1.18)  |        | 7.08)       | 4.69)       | -1.32)  |        |
|                  |               | 14.58   | -0.84   |        | 266.42   | 247.73   | -0.20   |        | 211.69   |               | -2.84   |        |             |             | -3.92   |        |
| Western Europe   | 18.64 (18.42, | (14.38, | (-0.92, | <0.001 | (265.59, | (246.89, | (-0.53, | 0.252  | (210.94, | 92.28 (91.78, | (-3.06, | <0.001 | 2.97 (2.88, | 0.95 (0.90, | (-4.15, | <0.001 |
|                  | 18.86)        | 14.78)  | -0.75)  |        | 267.26)  | 248.56)  | 0.14)   |        | 212.43)  | 92.79)        | -2.62)  |        | 3.06)       | 1.01)       | -3.69)  |        |
| High-income      |               | 17.64   | -0.09   |        | 357.52   | 432.18   | 0.93    |        | 181.80   | 143.12        | -0.78   |        |             |             | -1.58   |        |
| North America    | 18.18 (17.93, | (17.41, | (-0.17, | 0.038  | (356.44, | (431.03, | (-0.33, | 0.149  | (181.03, | (142.46,      | (-1.12, | <0.001 | 2.23 (2.14, | 1.39 (1.32, | (-2.08, | <0.001 |
|                  | 18.42)        | 17.88)  | -0.01)  |        | 358.61)  | 433.34)  | 2.20)   |        | 182.57)  | 143.78)       | -0.44)  |        | 2.31)       | 1.45)       | -1.07)  |        |
|                  |               | 32.41   | -0.71   |        | 385.07   | 353.41   | -0.27   |        | 404.39   | 343.21        | -0.57   |        |             |             | -0.62   |        |
| Central Asia     | 40.00 (39.25, | (31.84, | (-0.75, | <0.001 | (382.73, | (351.54, | (-0.34, | <0.001 | (401.98, | (341.37,      | (-0.87, | <0.001 | 5.78 (5.50, | 4.84 (4.62, | (-1.00, | 0.001  |
|                  | 40.77)        | 32.98)  | -0.66)  |        | 387.43)  | 355.29)  | -0.20)  |        | 406.81)  | 345.06)       | -0.28)  |        | 6.08)       | 5.07)       | -0.25)  |        |
|                  |               | 33.58   | -0.16   |        | 379.83   | 402.23   | 0.23    |        | 307.63   | 364.97        | 0.79    |        |             |             | 1.02    |        |
| Eastern Europe   | 35.28 (34.90, | (33.16, | (-0.22, | <0.001 | (378.56, | (400.78, | (0.08,  | 0.003  | (306.49, | (363.63,      | (-0.24, | 0.133  | 4.09 (3.96, | 5.09 (4.94, | (-0.27, | 0.121  |
|                  | 35.67)        | 33.99)  | -0.10)  |        | 381.10)  | 403.68)  | 0.38)   |        | 308.78)  | 366.32)       | 1.83)   |        | 4.22)       | 5.25)       | 2.32)   |        |
| Southern         |               | 23.04   | -1.16   |        | 539.47   | 477.82   | -0.40   |        | 493.73   | 272.05        | -2.30   |        |             |             | -2.38   |        |
| Sub-Saharan      | 32.33 (31.54, | (22.54, | (-1.22, | <0.001 | (536.27, | (475.49, | (-0.45, | <0.001 | (490.59, | (270.30,      | (-2.99, | <0.001 | 7.46 (7.07, | 3.64 (3.44, | (-3.67, | <0.001 |
| Africa           | 33.15)        | 23.56)  | -1.10)  |        | 542.70)  | 480.16)  | -0.35)  |        | 496.89)  | 273.81)       | -1.60)  |        | 7.86)       | 3.84)       | -1.07)  |        |
| High-income Asia |               | 22.14   | -0.48   |        | 269.63   | 272.91   | 0.06    |        | 288.39   | 121.40        | -2.94   |        |             |             | -4.02   |        |
| Pacific          | 25.47 (25.10, | (21.75, | (-0.61, | <0.001 | (268.40, | (271.55, | (-0.28, | 0.737  | (287.11, | (120.50,      | (-3.14, | <0.001 | 4.16 (4.01, | 1.27 (1.18, | (-4.30, | <0.001 |
|                  | 25.86)        | 22.52)  | -0.35)  |        | 270.87)  | 274.28)  | 0.40)   |        | 289.67)  | 122.31)       | -2.74)  |        | 4.31)       | 1.36)       | -3.74)  |        |
|                  |               | 24.42   | -1.10   |        | 372.92   | 335.46   | -0.31   |        | 380.52   | 197.50        | -2.29   |        |             |             | -3.00   |        |
| Central Europe   | 33.65 (33.14, | (23.92, | (-1.14, | <0.001 | (371.19, | (333.62, | (-0.61, | 0.041  | (378.78, | (196.09,      | (-2.51, | <0.001 | 5.42 (5.21, | 2.27 (2.13, | (-3.33, | <0.001 |
|                  | 34.18)        | 24.92)  | -1.05)  |        | 374.65)  | 337.30)  | -0.01)  |        | 382.26)  | 198.91)       | -2.07)  |        | 5.63)       | 2.43)       | -2.66)  |        |
| Andean Latin     |               | 31.39   | -1.14   |        | 487.98   | 424.45   | -0.46   |        | 557.33   | 289.89        | -2.20   |        |             |             | -2.42   |        |
| America          | 43.70 (42.62, | (30.71, | (-1.17, | <0.001 | (484.32, | (421.92, | (-0.52, | <0.001 | (553.48, | (287.81,      | (-2.67, | <0.001 | 8.64 (8.16, | 4.21 (3.97, | (-2.94, | <0.001 |
|                  | 44.81)        | 32.09)  | -1.11)  |        | 491.66)  | 426.99)  | -0.40)  |        | 561.20)  | 291.99)       | -1.73)  |        | 9.14)       | 4.47)       | -1.89)  |        |
|                  |               | 37.17   | -0.18   |        | 461.09   | 447.85   | -0.06   |        | 451.49   | 384.71        | -0.50   |        |             |             | -0.56   |        |
| Caribbean        | 39.28 (38.23, | (36.28, | (-0.22, | <0.001 | (457.49, | (444.77, | (-0.30, | 0.633  | (447.92, | (381.86,      | (-0.77, | <0.001 | 7.14 (6.69, | 5.99 (5.64, | (-0.84, | <0.001 |
|                  | 40.36)        | 38.07)  | -0.14)  |        | 464.70)  | 450.94)  | 0.18)   |        | 455.09)  | 387.58)       | -0.23)  |        | 7.61)       | 6.36)       | -0.27)  |        |
| Southern Latin   |               | 21.06   | -1.15   |        | 300.04   | 253.45   | -0.56   |        | 450.34   | 198.17        | -2.79   |        |             |             | -3.23   |        |
| America          | 29.56 (28.78, | (20.50, | (-1.22, | <0.001 | (297.56, | (251.52, | (-0.72, | <0.001 | (447.30, | (196.46,      | (-3.06, | <0.001 | 6.97 (6.60, | 2.68 (2.49, | (-3.23, | <0.001 |
|                  | 30.35)        |         |         |        |          |          |         |        |          |               |         |        | 7.36)       | 2.89)       | (-3.50, |        |

|                      |                      |         |         |        |          |          |         |       |          |                      |         |        |             |             |         |        |
|----------------------|----------------------|---------|---------|--------|----------|----------|---------|-------|----------|----------------------|---------|--------|-------------|-------------|---------|--------|
|                      |                      | 21.62)  | -1.09)  |        | 302.54)  | 255.40)  | -0.40)  |       | 453.39)  | 199.90)              | -2.52)  |        |             |             | -2.97)  |        |
| Oceania              | 72.51 (69.11, 76.05) | 73.53   | 0.05    |        | 591.61   | 587.62   | -0.01   |       | 845.39   | 851.77               | -0.02   |        | 12.74       | 12.83       | -0.03   |        |
|                      |                      | (71.21, | (0.03,  | <0.001 | (581.80, | (581.02, | (-0.06, | 0.560 | (833.67, | (843.84,             | (-0.14, | 0.777  | (11.33,     | (11.87,     | (-0.16, | 0.691  |
|                      |                      | 75.91)  | 0.08)   |        | 601.55)  | 594.28)  | 0.03)   |       | 857.24)  | 859.76)              | 0.11)   |        | 14.29)      | 13.85)      | 0.10)   |        |
| Australasia          | 18.42 (17.51, 19.37) | 16.21   | -0.44   |        | 252.35   | 241.33   | -0.13   |       | 142.57   | 79.59 (77.87, 81.35) | -2.00   |        | 1.75 (1.48, | 0.69 (0.54, | -3.19   |        |
|                      |                      | (15.43, | (-0.47, | <0.001 | (248.94, | (238.31, | (-0.30, | 0.133 | (140.01, |                      | (-2.26, | <0.001 | 2.06)       | 0.88)       | (-3.54, | <0.001 |
|                      |                      | 17.02)  | -0.41)  |        | 255.79)  | 244.39)  | 0.04)   |       | 145.16)  | -1.74)               |         |        | 2.06)       | 0.88)       | (-2.84, |        |
| <b>Women</b>         |                      |         |         |        |          |          |         |       |          |                      |         |        |             |             |         |        |
| Global               | 32.02 (31.91, 32.13) | 27.40   | -0.53   |        | 447.78   | 447.41   | 0.06    |       | 393.26   | 254.26               | -1.43   |        | 5.47 (5.43, | 3.10 (3.07, | -1.94   |        |
|                      |                      | (27.32, | (-0.60, | <0.001 | (447.37, | (447.07, | (-0.31, | 0.760 | (392.88, | (254.00,             | (-1.67, | <0.001 | 5.52)       | 3.13)       | (-2.16, | <0.001 |
|                      |                      | 27.48)  | -0.45)  |        | 448.19)  | 447.75)  | 0.42)   |       | 393.64)  | 254.52)              | -1.20)  |        |             |             | -1.71)  |        |
| <b>SDI category</b>  |                      |         |         |        |          |          |         |       |          |                      |         |        |             |             |         |        |
| High                 | 22.64 (22.41, 22.87) | 21.47   | -0.18   |        | 377.72   | 423.86   | 0.55    |       | 215.66   | 142.41               | -1.41   |        | 2.65 (2.57, | 1.28 (1.23, | -2.47   |        |
|                      |                      | (21.25, | (-0.22, | <0.001 | (376.78, | (422.87, | (-0.16, | 0.130 | (214.95, | (141.84,             | (-1.63, | <0.001 | 2.73)       | 1.33)       | (-2.65, | <0.001 |
|                      |                      | 21.69)  | -0.14)  |        | 378.67)  | 424.85)  | 1.26)   |       | 216.38)  | 142.98)              | -1.19)  |        |             |             | -2.30)  |        |
| High-middle          | 32.50 (32.28, 32.73) | 25.16   | -0.87   |        | 441.33   | 411.74   | -0.19   |       | 343.90   | 197.80               | -1.89   |        | 4.51 (4.42, | 2.06 (2.01, | -2.69   |        |
|                      |                      | (24.96, | (-0.92, | <0.001 | (440.49, | (410.96, | (-0.42, | 0.102 | (343.16, | (197.27,             | (-2.27, | <0.001 | 4.59)       | 2.11)       | (-3.22, | <0.001 |
|                      |                      | 25.35)  | -0.81)  |        | 442.18)  | 412.52)  | 0.04)   |       | 344.65)  | 198.34)              | -1.50)  |        |             |             | -2.14)  |        |
| Middle               | 34.89 (34.69, 35.08) | 28.57   | -0.67   |        | 478.26   | 456.42   | -0.10   |       | 454.82   | 258.64               | -1.91   |        | 6.39 (6.31, | 3.07 (3.02, | -2.48   |        |
|                      |                      | (28.42, | (-0.75, | <0.001 | (477.53, | (455.81, | (-0.29, | 0.311 | (454.10, | (258.18,             | (-2.10, | <0.001 | 6.48)       | 3.12)       | (-2.68, | <0.001 |
|                      |                      | 28.73)  | -0.59)  |        | 479.00)  | 457.03)  | 0.09)   |       | 455.54)  | 259.10)              | -1.71)  |        |             |             | -2.28)  |        |
| Low-middle           | 32.54 (32.29, 32.79) | 29.41   | -0.33   |        | 435.91   | 446.45   | 0.14    |       | 466.52   | 305.67               | -1.43   |        | 6.88 (6.77, | 4.10 (4.03, | -1.72   |        |
|                      |                      | (29.23, | (-0.42, | <0.001 | (435.00, | (445.75, | (-0.25, | 0.483 | (465.57, | (305.10,             | (-1.62, | <0.001 | 7.00)       | 4.17)       | (-1.95, | <0.001 |
|                      |                      | 29.59)  | -0.25)  |        | 436.82)  | 447.14)  | 0.54)   |       | 467.47)  | 306.25)              | -1.25)  |        |             |             | -1.48)  |        |
| Low                  | 36.28 (35.88, 36.69) | 29.96   | -0.65   |        | 494.73   | 482.84   | -0.05   |       | 456.59   | 326.95               | -1.14   |        | 6.76 (6.59, | 4.50 (4.40, | -1.39   |        |
|                      |                      | (29.73, | (-0.71, | <0.001 | (493.28, | (481.90, | (-0.31, | 0.710 | (455.17, | (326.16,             | (-1.20, | <0.001 | 6.94)       | 4.59)       | (-1.49, | <0.001 |
|                      |                      | 30.20)  | -0.59)  |        | 496.20)  | 483.79)  | 0.21)   |       | 458.02)  | 327.75)              | -1.07)  |        |             |             | -1.28)  |        |
| <b>21 GBD region</b> |                      |         |         |        |          |          |         |       |          |                      |         |        |             |             |         |        |
| South Asia           | 28.82 (28.58, 29.06) | 27.05   | -0.21   |        | 389.38   | 404.66   | 0.20    |       | 349.46   | 248.78               | -1.17   |        | 4.94 (4.85, | 3.19 (3.13, | -1.54   |        |
|                      |                      | (26.88, | (-0.31, | <0.001 | (388.51, | (404.01, | (-0.24, | 0.377 | (348.63, | (248.27,             | (-1.52, | <0.001 | 5.05)       | 3.24)       | (-1.98, | <0.001 |
|                      |                      | 27.22)  | -0.12)  |        | 390.26)  | 405.31)  | 0.63)   |       | 350.29)  | 249.29)              | -0.83)  |        |             |             | -1.09)  |        |

|                              |               |         |         |        |          |          |         |        |          |               |         |        |             |             |         |        |
|------------------------------|---------------|---------|---------|--------|----------|----------|---------|--------|----------|---------------|---------|--------|-------------|-------------|---------|--------|
|                              |               | 20.41   | -1.13   |        | 408.42   | 367.33   | -0.35   |        | 411.06   | 207.94        | -2.31   |        | 5.61 (5.52, | 2.13 (2.08, | -3.43   |        |
| East Asia                    | 28.15 (27.95, | (20.23, | (-1.21, | <0.001 | (407.64, | (366.59, | (-0.49, | <0.001 | (410.29, | (207.38,      | (-2.84, | <0.001 | 5.70)       | 2.19)       | (-4.09, | <0.001 |
|                              | 28.36)        | 20.58)  | -1.05)  |        | 409.19)  | 368.07)  | -0.21)  |        | 411.84)  | 208.50)       | -1.78)  |        |             |             | -2.77)  |        |
| North Africa and Middle East | 46.00 (45.45, | 40.60   | -0.42   |        | 552.95   | 540.51   | -0.03   |        | 571.84   | 360.63        | -1.53   |        | 8.30 (8.07, | 4.71 (4.59, | -1.88   |        |
|                              | 46.55)        | (40.25, | (-0.44, | <0.001 | (551.06, | (539.22, | (-0.27, | 0.787  | (569.93, | (359.58,      | (-1.61, | <0.001 | 8.54)       | 4.84)       | (-2.11, | <0.001 |
|                              |               | 40.96)  | -0.40)  |        | 554.85)  | 541.80)  | 0.21)   |        | 573.76)  | 361.68)       | -1.45)  |        |             |             | -1.66)  |        |
| Western                      |               | 28.11   | -0.55   |        | 502.21   | 492.63   | -0.03   |        | 396.65   | 290.97        | -1.06   |        | 5.75 (5.48, | 3.89 (3.75, | -1.33   |        |
| Sub-Saharan Africa           | 33.20 (32.57, | (27.75, | (-0.59, | <0.001 | (499.78, | (491.15, | (-0.24, | 0.800  | (394.43, | (289.80,      | (-1.13, | <0.001 | 6.03)       | 4.03)       | (-1.46, | <0.001 |
|                              | 33.85)        | 28.48)  | -0.52)  |        | 504.65)  | 494.12)  | 0.18)   |        | 398.87)  | 292.13)       | -0.99)  |        |             |             | -1.21)  |        |
| Southeast Asia               | 40.78 (40.37, | 36.89   | -0.33   |        | 521.31   | 508.68   | -0.05   |        | 610.09   | 394.82        | -1.47   |        | 8.72 (8.53, | 5.02 (4.90, | -1.87   |        |
|                              | 41.19)        | (36.57, | (-0.38, | <0.001 | (519.84, | (507.49, | (-0.26, | 0.629  | (608.49, | (393.77,      | (-1.58, | <0.001 | 8.91)       | 5.14)       | (-2.05, | <0.001 |
|                              |               | 37.22)  | -0.28)  |        | 522.78)  | 509.88)  | 0.16)   |        | 611.70)  | 395.87)       | -1.37)  |        |             |             | -1.69)  |        |
| Eastern                      |               | 23.33   | -1.59   |        | 595.84   | 551.14   | -0.23   |        | 508.14   | 293.54        | -1.87   |        | 7.53 (7.22, | 3.83 (3.68, | -2.30   |        |
| Sub-Saharan Africa           | 36.99 (36.31, | (22.98, | (-1.67, | <0.001 | (593.20, | (549.50, | (-0.49, | 0.083  | (505.62, | (292.31,      | (-1.99, | <0.001 | 7.85)       | 3.97)       | (-2.42, | <0.001 |
|                              | 37.67)        | 23.68)  | -1.51)  |        | 598.49)  | 552.78)  | 0.03)   |        | 510.67)  | 294.77)       | -1.76)  |        |             |             | -2.17)  |        |
| Central Latin America        | 41.67 (40.96, | 30.45   | -1.08   |        | 600.51   | 525.87   | -0.41   |        | 355.13   | 196.61        | -2.01   |        | 5.12 (4.87, | 2.49 (2.35, | -2.48   |        |
|                              | 42.39)        | (29.97, | (-1.12, | <0.001 | (597.82, | (523.89, | (-0.70, | 0.005  | (353.07, | (195.40,      | (-2.38, | <0.001 | 5.38)       | 2.63)       | (-3.01, | <0.001 |
|                              |               | 30.93)  | -1.03)  |        | 603.20)  | 527.86)  | -0.12)  |        | 357.21)  | 197.83)       | -1.64)  |        |             |             | -1.95)  |        |
| Tropical Latin America       | 56.62 (55.78, | 33.04   | -1.84   |        | 651.17   | 521.95   | -0.75   |        | 614.27   | 236.92        | -3.18   |        | 9.79 (9.44, | 3.27 (3.11, | -3.68   |        |
|                              | 57.47)        | (32.52, | (-1.95, | <0.001 | (648.32, | (519.87, | (-0.86, | <0.001 | (611.48, | (235.53,      | (-3.36, | <0.001 | 10.15)      | 3.43)       | (-3.90, | <0.001 |
|                              |               | 33.57)  | -1.74)  |        | 654.03)  | 524.04)  | -0.64)  |        | 617.07)  | 238.32)       | -3.00)  |        |             |             | -3.46)  |        |
| Central                      |               | 24.92   | -1.08   |        | 494.12   | 446.34   | -0.32   |        | 428.27   | 283.37        | -1.42   |        | 6.29 (5.78, | 3.86 (3.61, | -1.75   |        |
| Sub-Saharan Africa           | 34.16 (32.97, | (24.28, | (-1.11, | <0.001 | (489.66, | (443.67, | (-0.52, | 0.002  | (424.05, | (281.20,      | (-1.54, | <0.001 | 6.83)       | 4.13)       | (-1.84, | <0.001 |
|                              | 35.38)        | 25.57)  | -1.05)  |        | 498.62)  | 449.02)  | -0.11)  |        | 432.53)  | 285.55)       | -1.30)  |        |             |             | -1.66)  |        |
| Western Europe               | 20.18 (19.86, | 16.39   | -0.71   |        | 321.06   | 307.10   | -0.10   |        | 196.70   |               | -2.53   |        | 2.56 (2.45, | 0.81 (0.75, | -3.93   |        |
|                              | 20.51)        | (16.09, | (-0.77, | <0.001 | (319.76, | (305.77, | (-0.44, | 0.588  | (195.68, | 93.45 (92.72, | (-2.78, | <0.001 | 2.68)       | 0.88)       | (-4.15, | <0.001 |
|                              |               | 16.70)  | -0.65)  |        | 322.37)  | 308.44)  | 0.25)   |        | 197.72)  | 94.18)        | -2.29)  |        |             |             | -3.71)  |        |
| High-income                  |               | 20.52   | -0.04   |        | 418.79   | 505.40   | 0.89    |        | 190.09   | 154.04        | -0.71   |        | 2.15 (2.04, | 1.32 (1.24, | -1.62   |        |
| North America                | 20.90 (20.53, | (20.17, | (-0.12, | 0.230  | (417.12, | (503.63, | (-0.22, | 0.116  | (188.98, | (153.07,      | (-1.21, | 0.007  | 2.27)       | 1.42)       | (-2.08, | <0.001 |
|                              | 21.27)        | 20.88)  | 0.03)   |        | 420.45)  | 507.18)  | 2.02)   |        | 191.21)  | 155.02)       | -0.20)  |        |             |             | -1.17)  |        |
| Central Asia                 | 39.90 (38.85, | 31.53   | -0.79   |        | 455.60   | 420.73   | -0.24   |        | 377.98   | 286.58        | -0.93   |        | 4.99 (4.61, | 3.53 (3.27, | -1.25   |        |
|                              | 40.98)        | (30.74, | (-0.84, | <0.001 | (452.02, | (417.82, | (-0.34, | <0.001 | (374.71, | (284.19,      | (-1.22, | <0.001 | 5.38)       | 3.81)       | (-1.66, | <0.001 |
|                              |               | 32.34)  | -0.74)  |        | 459.20)  | 423.64)  | -0.13)  |        | 381.26)  | 288.98)       | -0.65)  |        |             |             | -0.85)  |        |

|                          |               |         |         |        |          |          |         |        |          |               |         |        |             |             |         |        |
|--------------------------|---------------|---------|---------|--------|----------|----------|---------|--------|----------|---------------|---------|--------|-------------|-------------|---------|--------|
| Eastern Europe           | 34.34 (33.80, | 33.30   | -0.07   |        | 477.10   | 539.38   | 0.47    |        | 252.08   | 271.74        | 0.34    |        | 2.69 (2.54, | 2.90 (2.73, | 0.40    |        |
|                          | 34.89)        | (32.71, | (-0.16, | 0.107  | (475.08, | (536.96, | (0.25,  | <0.001 | (250.60, | (270.06,      | (-0.39, | 0.364  | 2.85)       | 3.07)       | (-0.65, | 0.454  |
|                          |               | 33.90)  | 0.02)   |        | 479.13)  | 541.82)  | 0.70)   |        | 253.56)  | 273.44)       | 1.06)   |        |             |             | 1.47)   |        |
| Southern                 |               | 21.80   | -1.18   |        | 632.98   | 549.97   | -0.48   |        | 482.42   | 223.79        | -2.52   |        |             |             | -3.27   |        |
| Sub-Saharan Africa       | 30.79 (29.71, | (21.10, | (-1.26, | <0.001 | (628.17, | (546.44, | (-0.51, | <0.001 | (478.12, | (221.55,      | (-3.92, | 0.001  | 6.95 (6.43, | 2.58 (2.34, | (-5.09, | 0.001  |
|                          | 31.89)        | 22.52)  | -1.11)  |        | 637.82)  | 553.51)  | -0.44)  |        | 486.75)  | 226.05)       | -1.09)  |        | 7.49)       | 2.83)       | -1.42)  |        |
| High-income Asia Pacific | 24.89 (24.36, | 21.27   | -0.54   |        | 330.38   | 326.58   | 0.06    |        | 250.30   | 108.99        | -2.83   |        | 3.27 (3.08, | 0.84 (0.74, | -4.63   |        |
|                          | 25.43)        | (20.73, | (-0.64, | <0.001 | (328.43, | (324.41, | (-0.41, | 0.802  | (248.60, | (107.75,      | (-3.12, | <0.001 | 3.47)       | 0.96)       | (-5.01, | <0.001 |
|                          |               | 21.83)  | -0.44)  |        | 332.34)  | 328.75)  | 0.53)   |        | 252.00)  | 110.25)       | -2.55)  |        |             |             | -4.25)  |        |
| Central Europe           | 35.66 (34.90, | 27.90   | -0.82   |        | 487.25   | 466.12   | -0.10   |        | 342.81   | 189.25        | -2.02   |        | 4.30 (4.04, | 1.66 (1.48, | -3.28   |        |
|                          | 36.43)        | (27.14, | (-0.88, | <0.001 | (484.43, | (463.00, | (-0.41, | 0.544  | (340.45, | (187.27,      | (-2.16, | <0.001 | 4.57)       | 1.85)       | (-3.53, | <0.001 |
|                          |               | 28.68)  | -0.77)  |        | 490.08)  | 469.26)  | 0.22)   |        | 345.17)  | 191.25)       | -1.87)  |        |             |             | -3.02)  |        |
| Andean Latin America     | 47.18 (45.60, | 32.85   | -1.25   |        | 526.06   | 453.23   | -0.49   |        | 549.17   | 257.07        | -2.55   |        | 8.44 (7.78, | 3.58 (3.26, | -2.88   |        |
|                          | 48.80)        | (31.86, | (-1.29, | <0.001 | (520.74, | (449.54, | (-0.63, | <0.001 | (543.80, | (254.29,      | (-3.35, | <0.001 | 9.14)       | 3.92)       | (-3.81, | <0.001 |
|                          |               | 33.86)  | -1.22)  |        | 531.43)  | 456.94)  | -0.35)  |        | 554.58)  | 259.87)       | -1.74)  |        |             |             | -1.95)  |        |
| Caribbean                | 46.63 (45.04, | 45.54   | -0.08   |        | 525.39   | 516.01   | -0.02   |        | 509.82   | 456.32        | -0.35   |        | 7.98 (7.33, | 7.05 (6.51, | -0.41   |        |
|                          | 48.27)        | (44.17, | (-0.12, | 0.001  | (520.03, | (511.37, | (-0.27, | 0.898  | (504.53, | (451.95,      | (-0.61, | 0.009  | 8.68)       | 7.61)       | (-0.71, | 0.008  |
|                          |               | 46.94)  | -0.03)  |        | 530.79)  | 520.68)  | 0.24)   |        | 515.16)  | 460.72)       | -0.09)  |        |             |             | -0.11)  |        |
| Southern Latin America   | 32.28 (31.15, | 23.52   | -1.08   |        | 360.19   | 307.51   | -0.53   |        | 429.77   | 189.27        | -2.75   |        | 6.44 (5.94, | 2.36 (2.10, | -3.38   |        |
|                          | 33.45)        | (22.70, | (-1.13, | <0.001 | (356.37, | (304.51, | (-0.70, | <0.001 | (425.61, | (186.91,      | (-3.07, | <0.001 | 6.97)       | 2.64)       | (-3.79, | <0.001 |
|                          |               | 24.37)  | -1.03)  |        | 364.04)  | 310.53)  | -0.36)  |        | 433.97)  | 191.65)       | -2.44)  |        |             |             | -2.96)  |        |
| Oceania                  | 74.48 (69.57, | 77.43   | 0.14    |        | 644.18   | 644.47   | 0.01    |        | 657.38   | 687.96        | 0.13    |        | 9.12 (7.44, | 9.64 (8.47, | 0.17    |        |
|                          | 79.65)        | (74.07, | (0.11,  | <0.001 | (629.55, | (634.68, | (-0.04, | 0.680  | (642.63, | (677.86,      | (-0.01, | 0.078  | 11.07)      | 10.92)      | (0.01,  | 0.041  |
|                          |               | 80.91)  | 0.17)   |        | 659.09)  | 654.37)  | 0.06)   |        | 672.41)  | 698.17)       | 0.27)   |        |             |             | 0.32)   |        |
| Australasia              | 20.74 (19.37, | 19.21   | -0.27   |        | 324.36   | 319.71   | -0.02   |        | 148.03   |               | -1.65   |        | 1.64 (1.28, | 0.67 (0.46, | -3.07   |        |
|                          | 22.17)        | (18.01, | (-0.35, | <0.001 | (318.90, | (314.79, | (-0.24, | 0.888  | (144.36, | 90.86 (88.27, | (-1.96, | <0.001 | 2.08)       | 0.93)       | (-3.69, | <0.001 |
|                          |               | 20.46)  | -0.18)  |        | 329.89)  | 324.69)  | 0.21)   |        | 151.78)  |               | -1.35)  |        |             |             | -2.43)  |        |
| <b>Men</b>               |               |         |         |        |          |          |         |        |          |               |         |        |             |             |         |        |
| Global                   | 29.98 (29.88, | 27.57   | -0.29   |        | 327.15   | 331.13   | 0.10    |        | 454.44   | 352.77        | -0.87   |        | 7.00 (6.95, | 5.27 (5.23, | -0.98   |        |
|                          | 30.09)        | (27.49, | (-0.32, | <0.001 | (326.81, | (330.84, | (-0.25, | 0.564  | (454.03, | (352.47,      | (-1.13, | <0.001 | 7.05)       | 5.31)       | (-1.25, | <0.001 |
|                          |               | 27.66)  | -0.27)  |        | 327.50)  | 331.42)  | 0.46)   |        | 454.85)  | 353.07)       | -0.61)  |        |             |             | -0.71)  |        |
| <b>SDI category</b>      |               |         |         |        |          |          |         |        |          |               |         |        |             |             |         |        |

|                                  |               |         |         |        |          |          |         |        |          |          |         |        |             |             |         |        |
|----------------------------------|---------------|---------|---------|--------|----------|----------|---------|--------|----------|----------|---------|--------|-------------|-------------|---------|--------|
| High                             | 19.48 (19.27, | 18.14   | -0.24   |        | 257.59   | 295.99   | 0.67    |        | 235.92   | 145.50   | -1.64   |        | 3.42 (3.33, | 1.79 (1.73, | -2.23   |        |
|                                  | 19.69)        | (17.94, | (-0.27, | <0.001 | (256.83, | (295.19, | (-0.25, | 0.153  | (235.18, | (144.95, | (-1.79, | <0.001 | 3.51)       | 1.86)       | (-2.40, | <0.001 |
|                                  |               | 18.33)  | -0.21)  |        | 258.36)  | 296.79)  | 1.59)   |        | 236.65)  | 146.06)  | -1.49)  |        |             |             | -2.06)  |        |
| High-middle                      | 31.75 (31.52, | 25.83   | -0.71   |        | 312.32   | 283.84   | -0.28   |        | 459.12   | 314.69   | -1.28   |        | 7.06 (6.96, | 4.69 (4.61, | -1.38   |        |
|                                  | 31.97)        | (25.64, | (-0.75, | <0.001 | (311.62, | (283.22, | (-0.48, | 0.005  | (458.27, | (314.05, | (-1.65, | <0.001 | 7.17)       | 4.77)       | (-1.86, | <0.001 |
|                                  |               | 26.01)  | -0.67)  |        | 313.01)  | 284.46)  | -0.09)  |        | 459.97)  | 315.34)  | -0.91)  |        |             |             | -0.89)  |        |
| Middle                           | 33.53 (33.34, | 30.81   | -0.29   |        | 353.35   | 351.16   | 0.04    |        | 529.89   | 404.06   | -0.90   |        | 8.20 (8.11, | 6.06 (5.99, | -1.03   |        |
|                                  | 33.72)        | (30.65, | (-0.32, | <0.001 | (352.73, | (350.63, | (-0.16, | 0.700  | (529.13, | (403.49, | (-1.16, | <0.001 | 8.30)       | 6.13)       | (-1.36, | <0.001 |
|                                  |               | 30.97)  | -0.27)  |        | 353.97)  | 351.69)  | 0.24)   |        | 530.65)  | 404.62)  | -0.65)  |        |             |             | -0.71)  |        |
| Low-middle                       | 29.28 (29.05, | 28.66   | -0.08   |        | 340.57   | 343.23   | 0.08    |        | 496.99   | 401.21   | -0.70   |        | 7.81 (7.68, | 6.17 (6.09, | -0.77   |        |
|                                  | 29.52)        | (28.49, | (-0.10, | <0.001 | (339.77, | (342.62, | (-0.23, | 0.611  | (496.02, | (400.55, | (-0.92, | <0.001 | 7.93)       | 6.25)       | (-1.01, | <0.001 |
|                                  |               | 28.84)  | -0.06)  |        | 341.37)  | 343.84)  | 0.39)   |        | 497.96)  | 401.87)  | -0.48)  |        |             |             | -0.53)  |        |
| Low                              | 32.64 (32.26, | 28.97   | -0.40   |        | 359.18   | 353.86   | -0.01   |        | 458.85   | 378.09   | -0.67   |        | 7.10 (6.92, | 5.72 (5.61, | -0.73   |        |
|                                  | 33.03)        | (28.74, | (-0.43, | <0.001 | (357.91, | (353.03, | (-0.30, | 0.952  | (457.42, | (377.23, | (-0.85, | <0.001 | 7.28)       | 5.83)       | (-0.92, | <0.001 |
|                                  |               | 29.21)  | -0.37)  |        | 360.45)  | 354.69)  | 0.28)   |        | 460.29)  | 378.95)  | -0.50)  |        |             |             | -0.55)  |        |
| <b>21 GBD region</b>             |               |         |         |        |          |          |         |        |          |          |         |        |             |             |         |        |
| South Asia                       | 24.26 (24.05, | 24.93   | 0.09    |        | 309.73   | 312.64   | 0.09    |        | 364.34   | 312.80   | -0.47   |        | 5.60 (5.50, | 4.72 (4.65, | -0.53   |        |
|                                  | 24.48)        | (24.77, | (0.03,  | 0.002  | (308.97, | (312.08, | (-0.24, | 0.607  | (363.52, | (312.24, | (-0.82, | 0.011  | 5.71)       | 4.79)       | (-0.95, | 0.017  |
|                                  |               | 25.08)  | 0.14)   |        | 310.48)  | 313.20)  | 0.42)   |        | 365.17)  | 313.37)  | -0.11)  |        |             |             | -0.09)  |        |
| East Asia                        | 29.63 (29.43, | 27.33   | -0.29   |        | 300.28   | 270.09   | -0.35   |        | 564.68   | 430.44   | -0.84   |        | 8.80 (8.69, | 6.61 (6.52, | -0.89   |        |
|                                  | 29.84)        | (27.14, | (-0.36, | <0.001 | (299.64, | (269.48, | (-0.44, | <0.001 | (563.80, | (429.68, | (-1.28, | <0.001 | 8.91)       | 6.71)       | (-1.56, | 0.009  |
|                                  |               | 27.53)  | -0.23)  |        | 300.93)  | 270.70)  | -0.25)  |        | 565.57)  | 431.21)  | -0.39)  |        |             |             | -0.22)  |        |
| North Africa and<br>Middle East  | 33.90 (33.44, | 31.84   | -0.20   |        | 407.66   | 413.40   | 0.10    |        | 543.00   | 391.34   | -1.12   |        | 8.22 (8.00, | 5.59 (5.46, | -1.33   |        |
|                                  | 34.36)        | (31.55, | (-0.23, | <0.001 | (406.08, | (412.33, | (-0.20, | 0.505  | (541.20, | (390.29, | (-1.42, | <0.001 | 8.45)       | 5.72)       | (-1.62, | <0.001 |
|                                  |               | 32.14)  | -0.18)  |        | 409.25)  | 414.48)  | 0.41)   |        | 544.80)  | 392.39)  | -0.82)  |        |             |             | -1.04)  |        |
| Western<br>Sub-Saharan<br>Africa | 31.73 (31.10, | 29.79   | -0.21   |        | 385.22   | 390.52   | 0.06    |        | 397.76   | 344.92   | -0.50   |        | 6.03 (5.76, | 5.11 (4.95, | -0.57   |        |
|                                  | 32.36)        | (29.40, | (-0.26, | <0.001 | (383.04, | (389.11, | (-0.17, | 0.625  | (395.55, | (343.60, | (-0.60, | <0.001 | 6.31)       | 5.27)       | (-0.69, | <0.001 |
|                                  |               | 30.18)  | -0.16)  |        | 387.40)  | 391.93)  | 0.28)   |        | 399.99)  | 346.25)  | -0.39)  |        |             |             | -0.46)  |        |
| Southeast Asia                   | 49.28 (48.81, | 45.03   | -0.30   |        | 459.32   | 441.94   | -0.09   |        | 684.56   | 584.36   | -0.50   |        | 10.52       | 8.79 (8.64, | -0.56   |        |
|                                  | 49.74)        | (44.68, | (-0.33, | <0.001 | (457.92, | (440.84, | (-0.34, | 0.467  | (682.84, | (583.09, | (-0.71, | <0.001 | (10.30,     | 8.95)       | (-0.78, | <0.001 |
|                                  |               | 45.38)  | -0.27)  |        | 460.73)  | 443.05)  | 0.16)   |        | 686.29)  | 585.63)  | -0.29)  |        | 10.74)      |             | -0.34)  |        |
| Eastern<br>Sub-Saharan           | 37.38 (36.68, | 28.64   | -0.91   |        | 404.19   | 387.99   | -0.09   |        | 610.61   | 435.05   | -1.15   |        | 9.56 (9.21, | 6.58 (6.40, | -1.27   |        |
|                                  | 38.10)        | (28.25, | (-0.95, | <0.001 | (401.90, | (386.55, | (-0.40, | 0.574  | (607.81, | (433.54, | (-1.30, | <0.001 | 9.92)       | 6.77)       | (-1.43, | <0.001 |

|                             |                      |         |         |        |          |          |         |        |          |               |         |        |             |             |         |        |
|-----------------------------|----------------------|---------|---------|--------|----------|----------|---------|--------|----------|---------------|---------|--------|-------------|-------------|---------|--------|
| Africa                      |                      | 29.04)  | -0.86)  |        | 406.50)  | 389.43)  | 0.22)   |        | 613.43)  | 436.58)       | -1.00)  |        |             |             | -1.12)  |        |
| Central Latin America       | 25.46 (24.89, 26.05) | 21.11   | -0.65   |        | 358.46   | 345.67   | -0.12   |        | 298.57   | 203.78        | -1.30   |        | 4.60 (4.35, | 3.00 (2.85, | -1.45   |        |
|                             |                      | (20.70, | (-0.69, | <0.001 | (356.33, | (344.02, | (-0.30, | 0.203  | (296.62, | (202.52,      | (-1.66, | <0.001 | 4.85)       | 3.16)       | (-1.88, | <0.001 |
| Tropical Latin America      | 47.29 (46.50, 48.08) | 21.52)  | -0.60)  |        | 360.60)  | 347.32)  | 0.06)   |        | 300.54)  | 205.05)       | -0.93)  |        | 10.46       | 3.51 (3.34, | -3.66   |        |
|                             |                      | (25.37, | (-2.15, | <0.001 | (487.02, | (377.25, | (-0.98, | <0.001 | (625.40, | (232.00,      | (-3.56, | <0.001 | (10.09,     | 3.69)       | (-3.93, | <0.001 |
| Central Sub-Saharan Africa  | 32.34 (31.16, 33.55) | 26.31)  | -2.01)  |        | 492.06)  | 380.83)  | -0.75)  |        | 631.19)  | 234.80)       | -3.08)  |        | 10.84)      |             | -3.38)  |        |
|                             |                      | 25.04   | -0.88   |        | 339.85   | 306.53   | -0.32   |        | 456.55   | 338.08        | -1.06   |        | 7.09 (6.54, | 5.13 (4.84, | -1.16   |        |
| Western Europe              | 17.12 (16.83, 17.43) | (24.39, | (-0.92, | <0.001 | (336.06, | (304.28, | (-0.60, | 0.022  | (452.18, | (335.72,      | (-1.21, | <0.001 | 7.66)       | 5.43)       | (-1.31, | <0.001 |
|                             |                      | 25.70)  | -0.84)  |        | 343.68)  | 308.80)  | -0.05)  |        | 460.96)  | 340.46)       | -0.92)  |        |             |             | -1.00)  |        |
| High-income North America   | 15.47 (15.15, 15.79) | 12.82   | -0.99   |        | 213.08   | 190.36   | -0.34   |        | 226.35   | 91.22 (90.52, | -3.13   |        | 3.36 (3.23, | 1.09 (1.01, | -3.88   |        |
|                             |                      | (12.56, | (-1.07, | <0.001 | (212.03, | (189.34, | (-0.65, | 0.039  | (225.27, | 91.93)        | (-3.35, | <0.001 | 3.49)       | 1.17)       | (-4.22, | <0.001 |
| Central Asia                | 40.15 (39.08, 41.25) | 13.09)  | -0.91)  |        | 214.13)  | 191.39)  | -0.02)  |        | 227.44)  |               | -2.92)  |        |             |             | -3.54)  |        |
|                             |                      | 14.80   | -0.16   |        | 296.59   | 359.85   | 0.98    |        | 173.63   | 132.38        | -0.90   |        | 2.30 (2.19, | 1.45 (1.36, | -1.55   |        |
| Eastern Europe              | 36.28 (35.73, 36.83) | (14.50, | (-0.21, | <0.001 | (295.20, | (358.37, | (-0.48, | 0.188  | (172.57, | (131.49,      | (-1.23, | <0.001 | 2.43)       | 1.55)       | (-2.01, | <0.001 |
|                             |                      | 15.10)  | -0.11)  |        | 297.99)  | 361.34)  | 2.47)   |        | 174.69)  | 133.28)       | -0.58)  |        |             |             | -1.09)  |        |
| Southern Sub-Saharan Africa | 33.98 (32.81, 35.19) | 33.33   | -0.62   |        | 313.62   | 287.52   | -0.29   |        | 431.77   | 399.74        | -0.28   |        | 6.60 (6.17, | 6.14 (5.80, | -0.26   |        |
|                             |                      | (32.52, | (-0.67, | <0.001 | (310.60, | (285.14, | (-0.33, | <0.001 | (428.22, | (396.93,      | (-0.64, | 0.143  | 7.06)       | 6.50)       | (-0.67, | 0.222  |
| High-income Asia Pacific    | 26.06 (25.52, 26.60) | 34.15)  | -0.58)  |        | 316.67)  | 289.91)  | -0.26)  |        | 435.35)  | 402.56)       | 0.09)   |        |             |             | 0.16)   |        |
|                             |                      | 33.97   | -0.22   |        | 283.66   | 268.00   | -0.19   |        | 363.64   | 458.76        | 1.03    |        | 5.49 (5.27, | 7.30 (7.04, | 1.10    |        |
| Central Europe              | 31.73 (31.03, 32.44) | (33.39, | (-0.31, | <0.001 | (282.12, | (266.37, | (-0.23, | <0.001 | (361.90, | (456.66,      | (-0.17, | 0.093  | 5.70)       | 7.56)       | (-0.49, | 0.175  |
|                             |                      | 34.55)  | -0.13)  |        | 285.20)  | 269.63)  | -0.15)  |        | 365.39)  | 460.87)       | 2.25)   |        |             |             | 2.71)   |        |
| Andean Latin America        | 40.07 (38.59, 41.59) | 24.30   | -1.13   |        | 438.91   | 405.39   | -0.25   |        | 505.17   | 320.53        | -1.65   |        | 7.99 (7.42, | 4.70 (4.37, | -1.93   |        |
|                             |                      | (23.56, | (-1.27, | <0.001 | (434.72, | (402.36, | (-0.40, | 0.001  | (500.58, | (317.83,      | (-2.43, | <0.001 | 8.60)       | 5.04)       | (-2.86, | <0.001 |
| Central Latin America       | 25.46 (24.89, 26.05) | 25.06)  | -0.99)  |        | 443.13)  | 408.44)  | -0.10)  |        | 509.79)  | 323.24)       | -0.87)  |        |             |             | -0.99)  |        |
|                             |                      | 22.95   | -0.44   |        | 210.82   | 222.77   | 0.21    |        | 325.43   | 133.05        | -3.05   |        | 5.02 (4.79, | 1.66 (1.52, | -3.75   |        |
| High-income Asia Pacific    | 26.06 (25.52, 26.60) | (22.41, | (-0.53, | <0.001 | (209.30, | (221.07, | (-0.03, | 0.088  | (323.53, | (131.75,      | (-3.36, | <0.001 | 5.26)       | 1.81)       | (-4.17, | <0.001 |
|                             |                      | 23.50)  | -0.35)  |        | 212.36)  | 224.48)  | 0.45)   |        | 327.33)  | 134.36)       | -2.75)  |        |             |             | -3.32)  |        |
| Central Europe              | 31.73 (31.03, 32.44) | 21.10   | -1.40   |        | 261.84   | 210.65   | -0.70   |        | 417.54   | 205.52        | -2.45   |        | 6.51 (6.20, | 2.87 (2.64, | -2.83   |        |
|                             |                      | (20.47, | (-1.43, | <0.001 | (259.82, | (208.65, | (-0.96, | <0.001 | (414.99, | (203.54,      | (-2.72, | <0.001 | 6.83)       | 3.11)       | (-3.22, | <0.001 |
| Andean Latin America        | 40.07 (38.59, 41.59) | 21.76)  | -1.38)  |        | 263.88)  | 212.67)  | -0.43)  |        | 420.10)  | 207.52)       | -2.18)  |        |             |             | -2.44)  |        |
|                             |                      | 29.92   | -1.01   |        | 448.10   | 395.18   | -0.42   |        | 565.54   | 322.34        | -1.90   |        | 8.85 (8.16, | 4.85 (4.47, | -2.01   |        |
| Andean Latin America        | 40.07 (38.59, 41.59) | (28.97, | (-1.04, | <0.001 | (443.10, | (391.73, | (-0.46, | <0.001 | (560.03, | (319.23,      | (-2.24, | <0.001 | 9.58)       | 5.25)       | (-2.51, | <0.001 |

|                                           |                      |         |         |        |               |             |         |        |               |               |         |        |             |             |         |        |
|-------------------------------------------|----------------------|---------|---------|--------|---------------|-------------|---------|--------|---------------|---------------|---------|--------|-------------|-------------|---------|--------|
|                                           |                      | 30.88)  | -0.98)  |        | 453.14)       | 398.66)     | -0.39)  |        | 571.10)       | 325.47)       | -1.56)  |        |             |             | -1.51)  |        |
| Caribbean                                 | 31.55 (30.20, 32.96) | 28.60   | -0.34   |        | 393.01        | 377.64      | -0.09   |        | 390.13        | 311.55        | -0.75   |        | 6.25 (5.65, | 4.91 (4.46, | -0.81   |        |
|                                           |                      | (27.50, | (-0.37, | <0.001 | (388.28,      | (373.62,    | (-0.33, | 0.427  | (385.36,      | (307.90,      | (-0.93, | <0.001 | 6.89)       | 5.40)       | (-1.00, | <0.001 |
| Southern Latin America                    | 26.76 (25.72, 27.84) | 29.73)  | -0.31)  |        | 397.79)       | 381.69)     | 0.14)   |        | 394.94)       | 315.24)       | -0.57)  |        |             |             | -0.62)  |        |
|                                           |                      | 18.55   | -1.25   |        | 238.33        | 198.67      | -0.62   |        | 471.41        | 207.24        | -2.78   |        | 7.52 (6.97, | 3.02 (2.72, | -3.10   |        |
| Oceania                                   | 70.58 (65.89, 75.53) | (17.81, | (-1.33, | <0.001 | (235.18,      | (196.24,    | (-0.68, | <0.001 | (466.99,      | (204.76,      | (-3.24, | <0.001 | 8.11)       | 3.33)       | (-3.41, | <0.001 |
|                                           |                      | 19.31)  | -1.17)  |        | 241.51)       | 201.12)     | -0.55)  |        | 475.87)       | 209.74)       | -2.33)  |        |             |             | -2.80)  |        |
| Australasia                               | 16.11 (14.91, 17.38) | 69.66   | -0.04   |        | 541.54        | 531.27      | -0.05   |        | 1023.90       | 1012.80       | -0.09   |        | 16.18       | 15.98       | -0.10   |        |
|                                           |                      | (66.48, | (-0.05, | <0.001 | (528.45,      | (522.43,    | (-0.09, | 0.015  | (1005.89,     | (1000.60,     | (-0.21, | 0.156  | (13.97,     | (14.48,     | (-0.22, | 0.128  |
| Hypertensive heart disease Overall        |                      | 72.97)  | -0.04)  |        | 554.89)       | 540.22)     | -0.01)  |        | 1042.17)      | 1025.10)      | 0.03)   |        | 18.66)      | 17.61)      | 0.03)   |        |
|                                           |                      | 13.18   | -0.69   |        | 180.38        | 162.18      | -0.33   |        | 137.08        |               | -2.39   |        | 1.86 (1.47, | 0.72 (0.51, | -3.26   |        |
| Global                                    | —                    | (12.19, | (-0.71, | <0.001 | (176.32,      | (158.69,    | (-0.52, | 0.001  | (133.54,      | 68.22 (65.97, | (-2.66, | <0.001 | 2.33)       | 1.00)       | (-3.69, | <0.001 |
|                                           |                      | 14.23)  | -0.67)  |        | 184.51)       | 165.74)     | -0.13)  |        | 140.69)       | 70.54)        | -2.13)  |        |             |             | -2.83)  |        |
| <b>Hypertensive heart disease Overall</b> |                      |         |         |        |               |             |         |        |               |               |         |        |             |             |         |        |
| SDI category                              | —                    | —       | —       | —      | 9.47 (9.43,   | 9.15 (9.11, | -0.10   |        | 40.53 (40.44, | 29.68 (29.62, | -1.07   |        | 0.70 (0.69, | 0.51 (0.50, | -1.04   |        |
|                                           |                      | —       | —       | —      | 9.51)         | 9.18)       | (-0.16, | 0.001  | 40.62)        | 29.75)        | (-1.20, | <0.001 | 0.71)       | 0.52)       | (-1.19, | <0.001 |
| High                                      | —                    | —       | —       | —      | 23.06 (22.90, | 23.89       | 0.15    |        | 18.02 (17.88, | 21.80 (21.65, | 0.67    |        | 0.28 (0.26, | 0.35 (0.34, | 0.82    |        |
|                                           |                      | —       | —       | —      | 23.23)        | (23.74,     | (0.01,  | 0.043  | 18.17)        | 21.95)        | (0.34,  | <0.001 | 0.30)       | 0.37)       | (0.45,  | <0.001 |
| High-middle                               | —                    | —       | —       | —      | 5.96 (5.89,   | 6.88 (6.82, | 0.48    |        | 24.93 (24.79, | 13.61 (13.52, | -2.08   |        | 0.43 (0.41, | 0.23 (0.22, | -2.28   |        |
|                                           |                      | —       | —       | —      | 6.03)         | 6.95)       | (0.40,  | <0.001 | 25.07)        | 13.71)        | (-2.30, | <0.001 | 0.45)       | 0.24)       | (-2.60, | <0.001 |
| Middle                                    | —                    | —       | —       | —      | 9.19 (9.12,   | 9.65 (9.58, | 0.16    |        | 52.06 (51.89, | 29.91 (29.80, | -1.90   |        | 0.90 (0.88, | 0.51 (0.50, | -1.94   |        |
|                                           |                      | —       | —       | —      | 9.27)         | 9.71)       | (0.13,  | <0.001 | 52.23)        | 30.02)        | (-1.96, | <0.001 | 0.93)       | 0.53)       | (-2.05, | <0.001 |
| Low-middle                                | —                    | —       | —       | —      | 3.93 (3.87,   | 4.30 (4.25, | 0.31    |        | 44.16 (43.95, | 31.65 (31.52, | -1.13   |        | 0.78 (0.75, | 0.56 (0.54, | -1.13   |        |
|                                           |                      | —       | —       | —      | 3.99)         | 4.35)       | (0.26,  | <0.001 | 44.37)        | 31.78)        | (-1.28, | <0.001 | 0.81)       | 0.57)       | (-1.30, | <0.001 |
|                                           |                      |         |         |        |               |             |         |        |               |               |         |        |             |             |         |        |



|                                  |   |   |   |   |                         |                            |                            |        |                               |                         |                            |        |                      |                      |                            |        |
|----------------------------------|---|---|---|---|-------------------------|----------------------------|----------------------------|--------|-------------------------------|-------------------------|----------------------------|--------|----------------------|----------------------|----------------------------|--------|
| Low                              | — | — | — | — | 5.10 (4.99,<br>5.21)    | 5.79 (5.71,<br>5.87)       | 0.44<br>(0.41,<br>0.47)    | <0.001 | 76.56 (76.14,<br>76.99)       | 57.12 (56.88,<br>57.36) | -1.00<br>(-1.11,<br>-0.88) | <0.001 | 1.36 (1.30,<br>1.42) | 1.01 (0.98,<br>1.04) | -1.01<br>(-1.14,<br>-0.89) | <0.001 |
| <b>21 GBD region</b>             |   |   |   |   |                         |                            |                            |        |                               |                         |                            |        |                      |                      |                            |        |
| South Asia                       | — | — | — | — | 1.71 (1.67,<br>1.75)    | 1.77 (1.74,<br>1.80)       | 0.13<br>(0.08,<br>0.17)    | <0.001 | 28.50 (28.33,<br>28.67)       | 20.46 (20.36,<br>20.57) | -1.13<br>(-1.39,<br>-0.87) | <0.001 | 0.50 (0.48,<br>0.53) | 0.36 (0.35,<br>0.38) | -1.17<br>(-1.64,<br>-0.70) | <0.001 |
| East Asia                        | — | — | — | — | 10.81 (10.72,<br>10.90) | 12.33<br>(12.24,<br>12.42) | 0.44<br>(0.39,<br>0.49)    | <0.001 | 50.71 (50.52,<br>50.90)       | 19.74 (19.62,<br>19.86) | -3.21<br>(-3.86,<br>-2.57) | <0.001 | 0.87 (0.85,<br>0.90) | 0.33 (0.31,<br>0.34) | -3.23<br>(-4.11,<br>-2.34) | <0.001 |
| North Africa and<br>Middle East  | — | — | — | — | 15.18 (14.95,<br>15.41) | 15.66<br>(15.51,<br>15.81) | 0.10<br>(0.08,<br>0.12)    | <0.001 | 63.87 (63.42,<br>64.32)       | 45.28 (45.02,<br>45.54) | -1.17<br>(-1.31,<br>-1.02) | <0.001 | 1.09 (1.03,<br>1.15) | 0.77 (0.73,<br>0.80) | -1.19<br>(-1.24,<br>-1.14) | <0.001 |
| Western<br>Sub-Saharan<br>Africa | — | — | — | — | 7.66 (7.44,<br>7.89)    | 7.80 (7.66,<br>7.94)       | 0.07<br>(0.02,<br>0.12)    | 0.006  | 62.14 (61.51,<br>62.77)       | 64.78 (64.37,<br>65.19) | 0.16<br>(0.03,<br>0.28)    | 0.014  | 1.09 (1.01,<br>1.18) | 1.14 (1.08,<br>1.19) | 0.17<br>(0.02,<br>0.32)    | 0.029  |
| Southeast Asia                   | — | — | — | — | 9.14 (9.00,<br>9.29)    | 9.73 (9.62,<br>9.85)       | 0.22<br>(0.20,<br>0.23)    | <0.001 | 50.33 (49.99,<br>50.66)       | 41.05 (40.81,<br>41.29) | -0.69<br>(-0.81,<br>-0.57) | <0.001 | 0.89 (0.84,<br>0.93) | 0.72 (0.69,<br>0.75) | -0.72<br>(-0.91,<br>-0.54) | <0.001 |
| Eastern<br>Sub-Saharan<br>Africa | — | — | — | — | 7.54 (7.31,<br>7.77)    | 7.87 (7.72,<br>8.02)       | 0.14<br>(0.13,<br>0.16)    | <0.001 | 123.76<br>(122.84,<br>124.68) | 64.77 (64.35,<br>65.20) | -2.20<br>(-2.31,<br>-2.10) | <0.001 | 2.21 (2.09,<br>2.33) | 1.15 (1.09,<br>1.20) | -2.23<br>(-2.36,<br>-2.10) | <0.001 |
| Central Latin<br>America         | — | — | — | — | 1.80 (1.70,<br>1.91)    | 2.26 (2.17,<br>2.35)       | 0.79<br>(0.67,<br>0.91)    | <0.001 | 22.24 (21.87,<br>22.63)       | 12.71 (12.49,<br>12.94) | -1.89<br>(-2.14,<br>-1.63) | <0.001 | 0.39 (0.34,<br>0.44) | 0.22 (0.19,<br>0.25) | -1.96<br>(-2.40,<br>-1.53) | <0.001 |
| Tropical Latin<br>America        | — | — | — | — | 1.72 (1.62,<br>1.83)    | 2.44 (2.34,<br>2.54)       | 1.23<br>(1.08,<br>1.37)    | <0.001 | 48.40 (47.84,<br>48.97)       | 24.39 (24.07,<br>24.71) | -2.31<br>(-2.51,<br>-2.12) | <0.001 | 0.87 (0.80,<br>0.95) | 0.43 (0.39,<br>0.48) | -2.37<br>(-2.57,<br>-2.17) | <0.001 |
| Central<br>Sub-Saharan<br>Africa | — | — | — | — | 4.23 (3.92,<br>4.55)    | 4.23 (4.04,<br>4.43)       | 0.01<br>(-0.03,<br>0.04)   | 0.770  | 86.72 (85.33,<br>88.13)       | 62.90 (62.15,<br>63.65) | -1.14<br>(-1.20,<br>-1.07) | <0.001 | 1.55 (1.37,<br>1.75) | 1.13 (1.03,<br>1.23) | -1.13<br>(-1.20,<br>-1.06) | <0.001 |
| Western Europe                   | — | — | — | — | 2.85 (2.76,<br>2.93)    | 2.30 (2.22,<br>2.38)       | -0.73<br>(-0.82,<br>-0.64) | <0.001 | 6.31 (6.19,<br>6.44)          | 4.08 (3.97,<br>4.18)    | -1.49<br>(-1.67,<br>-1.31) | <0.001 | 0.11 (0.09,<br>0.13) | 0.07 (0.06,<br>0.08) | -1.45<br>(-2.69,<br>-0.21) | 0.023  |

|                  |   |   |   | -0.64) |               |             |         |        | -1.30)        |               |         |        |             | -0.20)      |         |        |
|------------------|---|---|---|--------|---------------|-------------|---------|--------|---------------|---------------|---------|--------|-------------|-------------|---------|--------|
|                  |   |   |   |        |               |             |         |        |               |               |         |        |             |             |         |        |
| High-income      | — | — | — | —      | 55.19 (54.78, | 59.42       | 0.30    |        | 26.58 (26.29, | 47.80 (47.42, | 2.06    |        | 0.39 (0.36, | 0.77 (0.72, | 2.41    |        |
| North America    |   |   |   |        | 55.61)        | (59.00,     | (0.16,  | <0.001 | 26.87)        | 48.17)        | (1.82,  | <0.001 | 0.43)       | 0.82)       | (2.12,  | <0.001 |
|                  |   |   |   |        |               | 59.85)      | 0.43)   |        |               |               | 2.30)   |        |             |             | 2.70)   |        |
|                  |   |   |   |        |               |             |         |        |               |               |         |        |             |             |         |        |
| Central Asia     | — | — | — | —      | 4.48 (4.23,   | 5.01 (4.80, | 0.39    |        | 27.98 (27.35, | 25.91 (25.41, | -0.26   |        | 0.49 (0.41, | 0.45 (0.39, | -0.25   |        |
|                  |   |   |   |        | 4.75)         | 5.24)       | (0.35,  | <0.001 | 28.63)        | 26.43)        | (-0.81, | 0.354  | 0.59)       | 0.53)       | (-0.83, | 0.404  |
|                  |   |   |   |        |               |             | 0.42)   |        |               |               | 0.29)   |        |             |             | 0.34)   |        |
|                  |   |   |   |        |               |             |         |        |               |               |         |        |             |             |         |        |
| Eastern Europe   | — | — | — | —      | 0.49 (0.44,   | 0.49 (0.45, | 0.01    |        | 10.26 (10.06, | 13.26 (13.01, | 1.03    |        | 0.19 (0.16, | 0.24 (0.21, | 0.83    |        |
|                  |   |   |   |        | 0.53)         | 0.54)       | (-0.13, | 0.871  | 10.47)        | 13.51)        | (-0.14, | 0.085  | 0.22)       | 0.28)       | (-0.26, | 0.136  |
|                  |   |   |   |        |               |             | 0.15)   |        |               |               | 2.21)   |        |             |             | 1.93)   |        |
|                  |   |   |   |        |               |             |         |        |               |               |         |        |             |             |         |        |
| Southern         |   |   |   |        |               |             |         |        |               |               |         |        |             |             |         |        |
| Sub-Saharan      | — | — | — | —      | 3.34 (3.08,   | 3.06 (2.88, | -0.30   |        | 107.03        | 54.99 (54.21, | -2.51   |        | 1.93 (1.73, | 0.98 (0.88, | -2.56   |        |
| Africa           |   |   |   |        | 3.62)         | 3.26)       | (-0.34, | <0.001 | (105.53,      | 55.79)        | (-3.63, | <0.001 | 2.14)       | 1.09)       | (-3.70, | <0.001 |
|                  |   |   |   |        |               |             | -0.26)  |        | 108.54)       |               | -1.39)  |        |             |             | -1.40)  |        |
|                  |   |   |   |        |               |             |         |        |               |               |         |        |             |             |         |        |
| High-income Asia | — | — | — | —      | 8.05 (7.84,   | 7.11 (6.90, | -0.44   |        | 21.26 (20.91, | 4.37 (4.20,   | -5.36   |        | 0.35 (0.30, | 0.07 (0.05, | -5.48   |        |
| Pacific          |   |   |   |        | 8.27)         | 7.33)       | (-0.51, | <0.001 | 21.61)        | 4.55)         | (-5.68, | <0.001 | 0.40)       | 0.09)       | (-6.58, | <0.001 |
|                  |   |   |   |        |               |             | -0.38)  |        |               |               | -5.03)  |        |             |             | -4.37)  |        |
|                  |   |   |   |        |               |             |         |        |               |               |         |        |             |             |         |        |
| Central Europe   | — | — | — | —      | 3.23 (3.08,   | 2.87 (2.72, | -0.41   |        | 16.71 (16.35, | 15.23 (14.86, | -0.35   |        | 0.30 (0.25, | 0.27 (0.22, | -0.37   |        |
|                  |   |   |   |        | 3.40)         | 3.04)       | (-0.47, | <0.001 | 17.07)        | 15.61)        | (-0.52, | <0.001 | 0.35)       | 0.33)       | (-0.64, | 0.008  |
|                  |   |   |   |        |               |             | -0.35)  |        |               |               | -0.19)  |        |             |             | -0.10)  |        |
|                  |   |   |   |        |               |             |         |        |               |               |         |        |             |             |         |        |
| Andean Latin     | — | — | — | —      | 1.67 (1.47,   | 3.35 (3.13, | 2.41    |        | 41.08 (40.02, | 25.58 (24.96, | -1.64   |        | 0.71 (0.57, | 0.43 (0.36, | -1.71   |        |
| America          |   |   |   |        | 1.90)         | 3.58)       | (2.31,  | <0.001 | 42.16)        | 26.20)        | (-2.02, | <0.001 | 0.86)       | 0.52)       | (-2.15, | <0.001 |
|                  |   |   |   |        |               |             | 2.52)   |        |               |               | -1.25)  |        |             |             | -1.26)  |        |
|                  |   |   |   |        |               |             |         |        |               |               |         |        |             |             |         |        |
| Caribbean        | — | — | — | —      | 5.94 (5.53,   | 5.85 (5.51, | -0.05   |        | 52.01 (50.78, | 54.36 (53.29, | 0.19    |        | 0.92 (0.76, | 0.96 (0.83, | 0.17    |        |
|                  |   |   |   |        | 6.38)         | 6.22)       | (-0.07, | <0.001 | 53.26)        | 55.45)        | (-0.02, | 0.070  | 1.10)       | 1.12)       | (0.00,  | 0.049  |
|                  |   |   |   |        |               |             | -0.03)  |        |               |               | 0.40)   |        |             |             | 0.34)   |        |
|                  |   |   |   |        |               |             |         |        |               |               |         |        |             |             |         |        |
| Southern Latin   | — | — | — | —      | 1.79 (1.61,   | 2.94 (2.74, | 1.72    |        | 18.50 (17.89, | 12.22 (11.80, | -1.42   |        | 0.32 (0.25, | 0.21 (0.16, | -1.46   |        |
| America          |   |   |   |        | 1.99)         | 3.16)       | (1.61,  | <0.001 | 19.13)        | 12.65)        | (-1.72, | <0.001 | 0.42)       | 0.27)       | (-1.63, | <0.001 |
|                  |   |   |   |        |               |             | 1.83)   |        |               |               | -1.12)  |        |             |             | -1.29)  |        |
|                  |   |   |   |        |               |             |         |        |               |               |         |        |             |             |         |        |
| Oceania          | — | — | — | —      | 7.45 (6.35,   | 7.10 (6.38, | -0.17   |        | 86.38 (82.56, | 85.59 (83.05, | -0.06   |        | 1.55 (1.08, | 1.54 (1.21, | -0.05   |        |
|                  |   |   |   |        | 8.69)         | 7.88)       | (-0.19, | <0.001 | 90.34)        | 88.18)        | (-0.17, | 0.276  | 2.17)       | 1.92)       | (-0.18, | 0.471  |
|                  |   |   |   |        |               |             | -0.14)  |        |               |               | 0.05)   |        |             |             | 0.08)   |        |
|                  |   |   |   |        |               |             |         |        |               |               |         |        |             |             |         |        |
| Australasia      | — | — | — | —      | 2.34 (2.03,   | 1.67 (1.43, | -1.16   |        | 3.72 (3.32,   | 2.66 (2.36,   | -1.12   |        | 0.06 (0.02, | 0.05 (0.01, | -0.61   |        |
|                  |   |   |   |        | 2.69)         | 1.93)       | (-1.22, | <0.001 | 4.16)         | 2.99)         | (-1.42, | <0.001 | 0.15)       | 0.11)       | (-0.61, | <0.001 |

|                              |   |   |   |   | -1.11)               |                      |                      |        |                      |                      | -0.82)               |        |                   |                   |                      |        | -0.61) |
|------------------------------|---|---|---|---|----------------------|----------------------|----------------------|--------|----------------------|----------------------|----------------------|--------|-------------------|-------------------|----------------------|--------|--------|
| <b>Women</b>                 |   |   |   |   |                      |                      |                      |        |                      |                      |                      |        |                   |                   |                      |        |        |
| Global                       | — | — | — | — | 8.31 (8.25, 8.36)    | 7.90 (7.85, 7.94)    | -0.16 (-0.22, -0.10) | <0.001 | 40.84 (40.71, 40.96) | 27.17 (27.09, 27.26) | -1.37 (-1.50, -1.24) | <0.001 | 0.71 (0.69, 0.72) | 0.47 (0.46, 0.48) | -1.39 (-1.57, -1.21) | <0.001 |        |
| <b>SDI category</b>          |   |   |   |   |                      |                      |                      |        |                      |                      |                      |        |                   |                   |                      |        |        |
| High                         | — | — | — | — | 19.80 (19.58, 20.01) | 19.42 (19.21, 19.62) | -0.03 (-0.16, 0.11)  | 0.709  | 12.30 (12.13, 12.47) | 13.67 (13.50, 13.84) | 0.38 (0.15, 0.62)    | 0.001  | 0.19 (0.17, 0.21) | 0.22 (0.20, 0.24) | 0.55 (0.12, 0.98)    | 0.012  |        |
| High-middle                  | — | — | — | — | 5.45 (5.36, 5.55)    | 6.33 (6.24, 6.42)    | 0.51 (0.44, 0.57)    | <0.001 | 19.54 (19.36, 19.72) | 9.14 (9.03, 9.26)    | -2.66 (-2.98, -2.35) | <0.001 | 0.34 (0.31, 0.36) | 0.15 (0.14, 0.17) | -2.85 (-3.42, -2.28) | <0.001 |        |
| Middle                       | — | — | — | — | 8.13 (8.03, 8.22)    | 8.57 (8.49, 8.65)    | 0.17 (0.11, 0.24)    | <0.001 | 50.62 (50.38, 50.86) | 23.74 (23.60, 23.87) | -2.62 (-2.78, -2.45) | <0.001 | 0.88 (0.85, 0.91) | 0.41 (0.39, 0.42) | -2.64 (-2.81, -2.48) | <0.001 |        |
| Low-middle                   | — | — | — | — | 3.46 (3.38, 3.55)    | 3.86 (3.80, 3.93)    | 0.37 (0.34, 0.41)    | <0.001 | 50.35 (50.03, 50.66) | 32.49 (32.30, 32.67) | -1.48 (-1.67, -1.30) | <0.001 | 0.88 (0.84, 0.93) | 0.57 (0.54, 0.60) | -1.46 (-1.67, -1.24) | <0.001 |        |
| Low                          | — | — | — | — | 4.48 (4.34, 4.63)    | 4.99 (4.89, 5.09)    | 0.37 (0.35, 0.40)    | <0.001 | 96.49 (95.82, 97.15) | 63.42 (63.07, 63.77) | -1.44 (-1.51, -1.36) | <0.001 | 1.71 (1.62, 1.80) | 1.12 (1.07, 1.17) | -1.46 (-1.56, -1.35) | <0.001 |        |
| <b>21 GBD region</b>         |   |   |   |   |                      |                      |                      |        |                      |                      |                      |        |                   |                   |                      |        |        |
| South Asia                   | — | — | — | — | 1.68 (1.63, 1.75)    | 1.75 (1.71, 1.79)    | 0.12 (0.02, 0.23)    | 0.019  | 34.87 (34.61, 35.14) | 21.33 (21.18, 21.48) | -1.74 (-2.20, -1.27) | <0.001 | 0.61 (0.58, 0.65) | 0.38 (0.36, 0.40) | -1.67 (-2.30, -1.05) | <0.001 |        |
| East Asia                    | — | — | — | — | 9.70 (9.58, 9.82)    | 11.07 (10.95, 11.19) | 0.43 (0.36, 0.50)    | <0.001 | 43.48 (43.23, 43.74) | 12.11 (11.98, 12.24) | -4.25 (-4.95, -3.54) | <0.001 | 0.75 (0.71, 0.78) | 0.19 (0.18, 0.21) | -4.55 (-5.47, -3.62) | <0.001 |        |
| North Africa and Middle East | — | — | — | — | 13.83 (13.52, 14.15) | 14.37 (14.16, 14.58) | 0.13 (0.12, 0.14)    | <0.001 | 70.57 (69.89, 71.26) | 43.06 (42.70, 43.42) | -1.68 (-1.90, -1.46) | <0.001 | 1.21 (1.12, 1.30) | 0.73 (0.68, 0.78) | -1.71 (-1.95, -1.47) | <0.001 |        |
| 35                           |   |   |   |   |                      |                      |                      |        |                      |                      |                      |        |                   |                   |                      |        |        |

|                |   |   |   |   |               |             |         |        |                |               |         |        |             |             |         |        |
|----------------|---|---|---|---|---------------|-------------|---------|--------|----------------|---------------|---------|--------|-------------|-------------|---------|--------|
| Western        |   |   |   |   | 6.65 (6.36,   | 6.92 (6.73, | 0.14    |        | 84.09 (83.05,  | 76.76 (76.15, | -0.30   |        | 1.48 (1.35, | 1.35 (1.27, | -0.30   |        |
| Sub-Saharan    | — | — | — | — | 6.96)         | 7.11)       | (0.12,  | <0.001 | 85.13)         | 77.37)        | (-0.42, | <0.001 | 1.63)       | 1.43)       | (-0.44, | <0.001 |
| Africa         |   |   |   |   |               |             | 0.16)   |        |                |               | -0.18)  |        |             |             | -0.16)  |        |
|                |   |   |   |   | 7.58 (7.40,   | 7.96 (7.81, | 0.16    |        | 51.44 (50.97,  | 33.59 (33.29, | -1.45   |        | 0.91 (0.85, | 0.59 (0.55, | -1.43   |        |
| Southeast Asia | — | — | — | — | 7.77)         | 8.11)       | (0.14,  | <0.001 | 51.92)         | 33.90)        | (-1.59, | <0.001 | 0.97)       | 0.63)       | (-1.54, | <0.001 |
|                |   |   |   |   |               |             | 0.19)   |        |                |               | -1.30)  |        |             |             | -1.33)  |        |
| Eastern        |   |   |   |   | 6.19 (5.91,   | 6.39 (6.21, | 0.11    |        | 151.01         | 66.77 (66.18, | -2.77   |        | 2.69 (2.51, | 1.18 (1.10, | -2.81   |        |
| Sub-Saharan    | — | — | — | — | 6.49)         | 6.58)       | (0.10,  | <0.001 | (149.62,       | 67.37)        | (-2.88, | <0.001 | 2.89)       | 1.26)       | (-2.99, | <0.001 |
| Africa         |   |   |   |   |               |             | 0.12)   |        | 152.42)        |               | -2.65)  |        |             |             | -2.63)  |        |
|                |   |   |   |   | 2.46 (2.28,   | 3.02 (2.87, | 0.72    |        | 23.12 (22.59,  | 11.73 (11.44, | -2.29   |        | 0.40 (0.34, | 0.20 (0.16, | -2.34   |        |
| Central Latin  | — | — | — | — | 2.64)         | 3.17)       | (0.60,  | <0.001 | 23.67)         | 12.03)        | (-2.71, | <0.001 | 0.48)       | 0.24)       | (-2.74, | <0.001 |
| America        |   |   |   |   |               |             | 0.84)   |        |                |               | -1.87)  |        |             |             | -1.95)  |        |
|                |   |   |   |   | 2.48 (2.30,   | 3.42 (3.25, | 1.11    |        | 45.75 (44.98,  | 21.34 (20.92, | -2.57   |        | 0.82 (0.72, | 0.38 (0.33, | -2.59   |        |
| Tropical Latin | — | — | — | — | 2.66)         | 3.59)       | (1.03,  | <0.001 | 46.53)         | 21.75)        | (-2.86, | <0.001 | 0.93)       | 0.44)       | (-3.02, | <0.001 |
| America        |   |   |   |   |               |             | 1.19)   |        |                |               | -2.27)  |        |             |             | -2.16)  |        |
|                |   |   |   |   | 3.81 (3.40,   | 3.82 (3.56, | 0.01    |        | 100.88 (98.78, | 69.42 (68.32, | -1.33   |        | 1.80 (1.53, | 1.24 (1.10, | -1.34   |        |
| Central        | — | — | — | — | 4.25)         | 4.09)       | (-0.02, | 0.424  | 103.01)        | 70.53)        | (-1.40, | <0.001 | 2.11)       | 1.40)       | (-1.42, | <0.001 |
| Sub-Saharan    |   |   |   |   |               |             | 0.04)   |        |                |               | -1.25)  |        |             |             | -1.26)  |        |
| Africa         |   |   |   |   |               |             |         |        |                |               |         |        |             |             |         |        |
|                |   |   |   |   | 2.40 (2.29,   | 1.83 (1.73, | -0.95   |        | 3.78 (3.64,    | 2.52 (2.40,   | -1.40   |        | 0.06 (0.05, | 0.04 (0.03, | -1.48   |        |
| Western Europe | — | — | — | — | 2.52)         | 1.93)       | (-1.07, | <0.001 | 3.92)          | 2.64)         | (-1.54, | <0.001 | 0.08)       | 0.06)       | (-2.44, | 0.003  |
|                |   |   |   |   |               |             | -0.84)  |        |                |               | -1.26)  |        |             |             | -0.50)  |        |
|                |   |   |   |   | 46.82 (46.28, | 46.93       | 0.06    |        | 17.65 (17.32,  | 29.15 (28.74, | 1.78    |        | 0.25 (0.21, | 0.46 (0.41, | 2.22    |        |
| High-income    | — | — | — | — | 47.36)        | (46.41,     | (-0.11, | 0.478  | 17.98)         | 29.57)        | (1.49,  | <0.001 | 0.29)       | 0.51)       | (1.78,  | <0.001 |
| North America  |   |   |   |   |               | 47.46)      | 0.22)   |        |                |               | 2.08)   |        |             |             | 2.65)   |        |
|                |   |   |   |   | 2.58 (2.31,   | 2.68 (2.46, | 0.13    |        | 19.64 (18.89,  | 16.96 (16.38, | -0.48   |        | 0.34 (0.25, | 0.30 (0.22, | -0.43   |        |
| Central Asia   | — | — | — | — | 2.87)         | 2.93)       | (0.08,  | <0.001 | 20.40)         | 17.55)        | (-0.77, | 0.001  | 0.46)       | 0.39)       | (-0.76, | 0.013  |
|                |   |   |   |   |               |             | 0.17)   |        |                |               | -0.18)  |        |             |             | -0.09)  |        |
|                |   |   |   |   | 0.32 (0.27,   | 0.33 (0.28, | 0.09    |        | 4.14 (3.96,    | 5.79 (5.55,   | 1.28    |        | 0.07 (0.05, | 0.10 (0.08, | 1.17    |        |
| Eastern Europe | — | — | — | — | 0.38)         | 0.40)       | (-0.21, | 0.561  | 4.33)          | 6.03)         | (0.16,  | 0.025  | 0.10)       | 0.14)       | (-0.02, | 0.054  |
|                |   |   |   |   |               |             | 0.39)   |        |                |               | 2.42)   |        |             |             | 2.37)   |        |
|                |   |   |   |   | 3.17 (2.82,   | 2.84 (2.60, | -0.38   |        | 130.39         | 53.36 (52.27, | -2.91   |        | 2.34 (2.04, | 0.95 (0.81, | -2.95   |        |
| Southern       | — | — | — | — | 3.56)         | 3.11)       | (-0.41, | <0.001 | (128.10,       | 54.47)        | (-4.98, | 0.007  | 2.67)       | 1.11)       | (-5.03, | 0.007  |
| Sub-Saharan    |   |   |   |   |               |             | -0.35)  |        | 132.71)        |               | -0.80)  |        |             |             | -0.82)  |        |
| Africa         |   |   |   |   |               |             |         |        |                |               |         |        |             |             |         |        |

|                          |   |   |   |   |                      |                      |                      |        |                      |                      |                      |        |                   |                   |                      |        |
|--------------------------|---|---|---|---|----------------------|----------------------|----------------------|--------|----------------------|----------------------|----------------------|--------|-------------------|-------------------|----------------------|--------|
| High-income Asia Pacific | — | — | — | — | 6.60 (6.33, 6.88)    | 5.43 (5.16, 5.71)    | -0.68 (-0.74, -0.62) | <0.001 | 15.22 (14.80, 15.65) | 2.83 (2.64, 3.04)    | -5.67 (-6.08, -5.26) | <0.001 | 0.25 (0.20, 0.31) | 0.04 (0.02, 0.07) | -6.13 (-7.77, -4.45) | <0.001 |
| Central Europe           | — | — | — | — | 2.33 (2.14, 2.53)    | 2.00 (1.81, 2.20)    | -0.53 (-0.59, -0.46) | <0.001 | 11.20 (10.78, 11.63) | 8.57 (8.17, 8.99)    | -0.93 (-1.23, -0.63) | <0.001 | 0.20 (0.15, 0.26) | 0.15 (0.10, 0.22) | -1.03 (-1.31, -0.74) | <0.001 |
| Andean Latin America     | — | — | — | — | 1.83 (1.53, 2.16)    | 4.02 (3.68, 4.39)    | 2.73 (2.67, 2.80)    | <0.001 | 43.51 (41.99, 45.07) | 20.74 (19.95, 21.54) | -2.52 (-3.15, -1.88) | <0.001 | 0.75 (0.56, 0.99) | 0.35 (0.26, 0.47) | -2.60 (-3.26, -1.94) | <0.001 |
| Caribbean                | — | — | — | — | 6.04 (5.46, 6.67)    | 5.86 (5.38, 6.38)    | -0.11 (-0.14, -0.08) | <0.001 | 58.65 (56.83, 60.50) | 59.09 (57.53, 60.69) | 0.07 (-0.21, 0.35)   | 0.630  | 1.03 (0.81, 1.31) | 1.04 (0.84, 1.27) | 0.06 (-0.22, 0.35)   | 0.660  |
| Southern Latin America   | — | — | — | — | 1.89 (1.62, 2.18)    | 3.08 (2.79, 3.40)    | 1.65 (1.42, 1.88)    | <0.001 | 15.06 (14.28, 15.86) | 9.01 (8.50, 9.54)    | -1.76 (-2.04, -1.47) | <0.001 | 0.26 (0.17, 0.39) | 0.15 (0.09, 0.24) | -1.97 (-2.46, -1.49) | <0.001 |
| Oceania                  | — | — | — | — | 6.45 (5.02, 8.18)    | 5.83 (4.92, 6.86)    | -0.35 (-0.38, -0.33) | <0.001 | 83.50 (78.18, 89.10) | 78.15 (74.74, 81.68) | -0.25 (-0.38, -0.12) | <0.001 | 1.49 (0.85, 2.43) | 1.39 (0.97, 1.94) | -0.25 (-0.38, -0.12) | <0.001 |
| Australasia              | — | — | — | — | 2.11 (1.70, 2.59)    | 1.44 (1.14, 1.81)    | -1.30 (-1.35, -1.24) | <0.001 | 2.53 (2.08, 3.06)    | 1.69 (1.36, 2.09)    | -1.33 (-1.49, -1.16) | <0.001 | 0.04 (0.00, 0.17) | 0.03 (0.00, 0.14) | -0.96 (-0.96, -0.96) | <0.001 |
| <b>Men</b>               |   |   |   |   |                      |                      |                      |        |                      |                      |                      |        |                   |                   |                      |        |
| Global                   | — | — | — | — | 10.60 (10.54, 10.66) | 10.38 (10.33, 10.43) | -0.06 (-0.13, 0.01)  | 0.074  | 40.23 (40.10, 40.35) | 32.17 (32.08, 32.26) | -0.76 (-0.89, -0.63) | <0.001 | 0.70 (0.68, 0.71) | 0.56 (0.54, 0.57) | -0.78 (-1.00, -0.57) | <0.001 |
| <b>SDI category</b>      |   |   |   |   |                      |                      |                      |        |                      |                      |                      |        |                   |                   |                      |        |
| High                     | — | — | — | — | 26.25 (26.01, 26.49) | 28.07 (27.83, 28.30) | 0.26 (0.07, 0.44)    | 0.006  | 23.58 (23.35, 23.81) | 29.39 (29.15, 29.63) | 0.79 (0.55, 1.03)    | <0.001 | 0.38 (0.35, 0.41) | 0.48 (0.45, 0.52) | 0.81 (0.43, 1.20)    | <0.001 |
| High-middle              | — | — | — | — | 6.45 (6.35, 6.55)    | 7.40 (7.31, 7.50)    | 0.45 (0.36, 0.55)    | <0.001 | 30.14 (29.93, 30.36) | 17.83 (17.68, 17.98) | -1.82 (-2.02, -1.62) | <0.001 | 0.52 (0.49, 0.55) | 0.31 (0.29, 0.33) | -1.88 (-2.17, -1.58) | <0.001 |

|                              |   |   |   |   |                      |                      |                    |        |                      |                      |                      |        |                   |                   |                      |        |
|------------------------------|---|---|---|---|----------------------|----------------------|--------------------|--------|----------------------|----------------------|----------------------|--------|-------------------|-------------------|----------------------|--------|
| Middle                       | — | — | — | — | 10.22 (10.12, 10.33) | 10.72 (10.63, 10.81) | 0.16 (0.11, 0.21)  | <0.001 | 53.44 (53.20, 53.69) | 36.04 (35.87, 36.21) | -1.35 (-1.48, -1.22) | <0.001 | 0.93 (0.90, 0.96) | 0.62 (0.60, 0.64) | -1.38 (-1.61, -1.14) | <0.001 |
| Low-middle                   | — | — | — | — | 4.39 (4.29, 4.48)    | 4.75 (4.67, 4.82)    | 0.27 (0.20, 0.34)  | <0.001 | 38.11 (37.84, 38.38) | 30.83 (30.65, 31.02) | -0.72 (-0.91, -0.53) | <0.001 | 0.67 (0.64, 0.71) | 0.54 (0.52, 0.57) | -0.73 (-1.00, -0.47) | <0.001 |
| Low                          | — | — | — | — | 5.74 (5.57, 5.91)    | 6.62 (6.50, 6.74)    | 0.50 (0.47, 0.53)  | <0.001 | 56.09 (55.58, 56.61) | 50.66 (50.34, 50.99) | -0.36 (-0.45, -0.27) | <0.001 | 1.00 (0.93, 1.07) | 0.90 (0.85, 0.94) | -0.38 (-0.46, -0.30) | <0.001 |
| <b>21 GBD region</b>         |   |   |   |   |                      |                      |                    |        |                      |                      |                      |        |                   |                   |                      |        |
| South Asia                   | — | — | — | — | 1.73 (1.68, 1.79)    | 1.79 (1.74, 1.83)    | 0.11 (0.08, 0.15)  | <0.001 | 22.54 (22.33, 22.75) | 19.64 (19.50, 19.78) | -0.43 (-0.86, 0.00)  | 0.052  | 0.40 (0.38, 0.43) | 0.35 (0.33, 0.37) | -0.44 (-0.97, 0.09)  | 0.103  |
| East Asia                    | — | — | — | — | 11.84 (11.71, 11.97) | 13.54 (13.41, 13.67) | 0.44 (0.37, 0.51)  | <0.001 | 57.50 (57.21, 57.78) | 27.05 (26.86, 27.24) | -2.58 (-2.96, -2.19) | <0.001 | 0.99 (0.95, 1.03) | 0.46 (0.43, 0.48) | -2.61 (-3.12, -2.09) | <0.001 |
| North Africa and Middle East | — | — | — | — | 16.44 (16.11, 16.78) | 16.81 (16.60, 17.03) | 0.07 (0.04, 0.11)  | <0.001 | 57.53 (56.93, 58.13) | 47.29 (46.93, 47.65) | -0.67 (-0.84, -0.49) | <0.001 | 0.98 (0.90, 1.06) | 0.80 (0.75, 0.85) | -0.68 (-0.87, -0.50) | <0.001 |
| Western Sub-Saharan Africa   | — | — | — | — | 8.67 (8.34, 9.02)    | 8.78 (8.56, 9.00)    | 0.06 (-0.03, 0.15) | 0.174  | 39.88 (39.16, 40.61) | 51.68 (51.15, 52.21) | 0.91 (0.71, 1.11)    | <0.001 | 0.70 (0.61, 0.80) | 0.91 (0.84, 0.98) | 0.94 (0.66, 1.22)    | <0.001 |
| Southeast Asia               | — | — | — | — | 10.74 (10.52, 10.96) | 11.48 (11.30, 11.65) | 0.24 (0.21, 0.28)  | <0.001 | 49.18 (48.71, 49.65) | 48.38 (48.02, 48.75) | -0.03 (-0.18, 0.13)  | 0.755  | 0.86 (0.80, 0.93) | 0.85 (0.80, 0.90) | -0.02 (-0.25, 0.21)  | 0.862  |
| Eastern Sub-Saharan Africa   | — | — | — | — | 8.99 (8.63, 9.36)    | 9.45 (9.22, 9.69)    | 0.17 (0.14, 0.19)  | <0.001 | 94.14 (92.99, 95.31) | 62.68 (62.08, 63.28) | -1.39 (-1.51, -1.27) | <0.001 | 1.68 (1.53, 1.85) | 1.11 (1.03, 1.19) | -1.42 (-1.59, -1.25) | <0.001 |
| Central Latin America        | — | — | — | — | 1.11 (0.99, 1.23)    | 1.44 (1.33, 1.55)    | 0.87 (0.77, 0.97)  | <0.001 | 21.32 (20.79, 21.86) | 13.76 (13.44, 14.10) | -1.47 (-1.84, -1.10) | <0.001 | 0.37 (0.31, 0.45) | 0.24 (0.20, 0.29) | -1.47 (-1.94, -1.00) | <0.001 |
| Tropical Latin America       | — | — | — | — | 0.94 (0.83, 1.05)    | 1.43 (1.32, 1.54)    | 1.46 (1.33, 1.59)  | <0.001 | 51.17 (50.34, 52.01) | 27.52 (27.04, 28.00) | -2.13 (-2.30, -1.96) | <0.001 | 0.92 (0.81, 1.04) | 0.49 (0.43, 0.56) | -2.13 (-2.33, -1.93) | <0.001 |







|                              |                      |                      |                      |        |                         |                         |                      |        |                      |                      |                      |        |                   |                   |                      |        |
|------------------------------|----------------------|----------------------|----------------------|--------|-------------------------|-------------------------|----------------------|--------|----------------------|----------------------|----------------------|--------|-------------------|-------------------|----------------------|--------|
| South Asia                   | 0.49 (0.46, 0.51)    | 0.62 (0.60, 0.64)    | 0.79 (0.55, 1.02)    | <0.001 | —                       | 1.36 (1.33, 1.39)       | —                    | —      | 8.90 (8.81, 8.99)    | 8.45 (8.38, 8.51)    | -0.20 (-0.48, 0.09)  | 0.175  | 0.15 (0.14, 0.16) | 0.14 (0.13, 0.15) | -0.11 (-0.69, 0.48)  | 0.715  |
| East Asia                    | 3.30 (3.25, 3.35)    | 4.04 (3.99, 4.09)    | 0.69 (0.59, 0.79)    | <0.001 | 24.77 (24.64, 24.91)    | 28.71 (28.58, 28.85)    | 0.50 (0.30, 0.70)    | <0.001 | 5.25 (5.19, 5.31)    | 3.03 (2.98, 3.08)    | -1.87 (-2.16, -1.57) | <0.001 | 0.09 (0.08, 0.10) | 0.05 (0.05, 0.06) | -2.48 (-2.77, -2.19) | <0.001 |
| North Africa and Middle East | 2.17 (2.09, 2.26)    | 2.43 (2.37, 2.49)    | 0.39 (0.31, 0.48)    | <0.001 | 14.22 (14.00, 14.45)    | 15.88 (15.73, 16.03)    | 0.37 (0.20, 0.53)    | <0.001 | 29.11 (28.81, 29.41) | 19.43 (19.26, 19.60) | -1.36 (-1.43, -1.29) | <0.001 | 0.48 (0.45, 0.52) | 0.32 (0.30, 0.35) | -1.42 (-1.59, -1.25) | <0.001 |
| Western Sub-Saharan Africa   | 0.77 (0.70, 0.84)    | 0.84 (0.79, 0.89)    | 0.29 (0.14, 0.45)    | <0.001 | 2.53 (2.40, 2.67)       | 3.48 (3.38, 3.58)       | 1.02 (0.73, 1.31)    | <0.001 | 13.21 (12.94, 13.49) | 12.48 (12.32, 12.65) | -0.21 (-0.37, -0.05) | 0.009  | 0.22 (0.18, 0.26) | 0.20 (0.18, 0.23) | -0.30 (-0.64, 0.03)  | 0.073  |
| Southeast Asia               | 1.06 (1.01, 1.11)    | 1.25 (1.21, 1.29)    | 0.56 (0.51, 0.63)    | <0.001 | 6.10 (5.99, 6.22)       | 7.47 (7.37, 7.57)       | 0.69 (0.59, 0.79)    | <0.001 | 4.40 (4.31, 4.50)    | 3.87 (3.80, 3.95)    | -0.39 (-0.47, -0.31) | <0.001 | 0.07 (0.06, 0.09) | 0.07 (0.06, 0.08) | 0.00 (0.00, 0.00)*   | 0.008  |
| Eastern Sub-Saharan Africa   | 0.62 (0.56, 0.69)    | 0.60 (0.56, 0.65)    | -0.17 (-0.29, -0.04) | 0.008  | 1.16 (1.07, 1.26)       | 1.16 (1.10, 1.22)       | 0.10 (-0.44, 0.63)   | 0.720  | 18.87 (18.54, 19.21) | 12.16 (11.99, 12.34) | -1.51 (-1.71, -1.31) | <0.001 | 0.32 (0.27, 0.36) | 0.20 (0.18, 0.23) | -1.60 (-1.89, -1.31) | <0.001 |
| Central Latin America        | 0.79 (0.72, 0.87)    | 1.30 (1.23, 1.38)    | 1.68 (1.50, 1.87)    | <0.001 | 1.88 (1.76, 2.00)       | 4.35 (4.23, 4.49)       | 2.97 (2.18, 3.76)    | <0.001 | 11.95 (11.68, 12.22) | 9.36 (9.17, 9.55)    | -0.80 (-1.20, -0.41) | <0.001 | 0.20 (0.17, 0.24) | 0.16 (0.14, 0.19) | -0.57 (-1.26, 0.13)  | 0.109  |
| Tropical Latin America       | 1.64 (1.54, 1.75)    | 1.65 (1.56, 1.73)    | -0.01 (-0.30, 0.28)  | 0.925  | 7.60 (7.38, 7.83)       | 6.63 (6.47, 6.80)       | -0.58 (-0.89, -0.26) | <0.001 | 33.66 (33.20, 34.12) | 15.25 (14.99, 15.50) | -2.72 (-3.02, -2.41) | <0.001 | 0.57 (0.51, 0.63) | 0.26 (0.23, 0.29) | -2.69 (-2.97, -2.40) | <0.001 |
| Central Sub-Saharan Africa   | 0.62 (0.51, 0.75)    | 0.59 (0.52, 0.66)    | -0.21 (-0.41, 0.00)  | 0.053  | 1.32 (1.14, 1.51)       | 0.73 (0.65, 0.82)       | -1.94 (-2.55, -1.32) | <0.001 | 12.82 (12.32, 13.34) | 9.80 (9.52, 10.08)   | -0.99 (-1.07, -0.91) | <0.001 | 0.21 (0.15, 0.29) | 0.16 (0.13, 0.21) | -0.95 (-1.12, -0.78) | <0.001 |
| Western Europe               | 8.59 (8.44, 8.74)    | 9.86 (9.69, 10.02)   | 0.47 (0.36, 0.59)    | <0.001 | 65.34 (64.93, 65.75)    | 75.79 (75.34, 76.24)    | 0.51 (0.40, 0.62)    | <0.001 | 12.65 (12.47, 12.84) | 7.79 (7.64, 7.94)    | -1.71 (-1.89, -1.54) | <0.001 | 0.21 (0.19, 0.24) | 0.13 (0.11, 0.15) | -1.68 (-2.10, -1.26) | <0.001 |
| High-income North America    | 55.73 (55.31, 56.16) | 57.85 (57.43, 58.27) | 0.10 (-0.02, 0.22)   | 0.088  | 449.17 (447.99, 450.36) | 467.22 (466.04, 468.40) | 0.11 (-0.02, 0.23)   | 0.089  | 15.35 (15.13, 15.58) | 8.94 (8.77, 9.10)    | -1.83 (-2.44, -1.22) | <0.001 | 0.26 (0.23, 0.29) | 0.15 (0.13, 0.17) | -1.88 (-2.68, -1.08) | <0.001 |

|                             |                        |                      |                      |        |                         |                         |                      |        |                      |                      |                      |        |                      |                   |                      |        |
|-----------------------------|------------------------|----------------------|----------------------|--------|-------------------------|-------------------------|----------------------|--------|----------------------|----------------------|----------------------|--------|----------------------|-------------------|----------------------|--------|
| Central Asia                | 9.63 (9.27, 10.01)     | 11.16 (10.83, 11.49) | 0.51 (0.48, 0.54)    | <0.001 | 75.66 (74.61, 76.72)    | 86.81 (85.89, 87.74)    | 0.48 (0.44, 0.51)    | <0.001 | 4.08 (3.85, 4.33)    | 6.52 (6.26, 6.78)    | 1.62 (0.99, 2.26)    | <0.001 | 0.07 (0.04, 0.10)    | 0.11 (0.08, 0.14) | 1.41 (0.16, 2.68)    | 0.027  |
|                             | 17.09 (16.82, 17.36)   | 23.58 (23.23, 23.93) | 1.12 (1.09, 1.14)    |        | 134.45 (133.71, 135.18) | 186.08 (185.15, 187.01) | 1.13 (1.09, 1.16)    |        | 3.95 (3.82, 4.09)    | 8.33 (8.11, 8.54)    | 2.79 (1.61, 3.99)    |        | 0.06 (0.05, 0.08)    | 0.14 (0.11, 0.17) | 3.11 (1.53, 4.71)    |        |
| Southern Sub-Saharan Africa | 1.25 (1.09, 1.41)      | 2.67 (2.50, 2.85)    | 2.64 (2.55, 2.74)    | <0.001 | 5.48 (5.13, 5.84)       | 15.41 (15.00, 15.83)    | 3.66 (3.42, 3.91)    | <0.001 | 29.42 (28.68, 30.19) | 15.52 (15.10, 15.95) | -2.15 (-3.01, -1.28) | <0.001 | 0.50 (0.41, 0.61)    | 0.26 (0.21, 0.32) | -2.19 (-3.18, -1.20) | <0.001 |
| High-income Asia Pacific    | 43.38 (42.89, 43.88)   | 48.78 (48.21, 49.36) | 0.41 (0.37, 0.46)    |        | 350.24 (348.84, 351.65) | 393.38 (391.79, 394.97) | 0.41 (0.34, 0.48)    |        | 8.16 (7.95, 8.38)    | 3.94 (3.77, 4.11)    | -2.47 (-2.72, -2.23) |        | 0.13 (0.11, 0.16)    | 0.06 (0.04, 0.09) | -2.76 (-3.07, -2.43) |        |
| Central Europe              | 14.63 (14.29, 14.98)   | 21.93 (21.46, 22.40) | 1.40 (1.36, 1.45)    | <0.001 | 114.12 (113.18, 115.06) | 173.38 (172.12, 174.65) | 1.45 (1.41, 1.50)    | <0.001 | 9.27 (9.00, 9.55)    | 10.14 (9.81, 10.47)  | 0.33 (0.17, 0.50)    | <0.001 | 0.16 (0.12, 0.20)    | 0.17 (0.13, 0.22) | 0.24 (-0.14, 0.62)   | 0.211  |
|                             | Andean Latin America   | 0.71 (0.58, 0.87)    | 1.53 (1.38, 1.69)    |        | 2.71 (2.52, 2.89)       | 1.62 (1.40, 1.86)       | 6.36 (6.05, 6.68)    |        | 4.91 (3.58, 6.26)    | 12.62 (12.06, 13.20) | 9.33 (8.96, 9.71)    |        | -1.04 (-1.52, -0.56) | 0.21 (0.14, 0.30) | 0.15 (0.11, 0.21)    |        |
| Caribbean                   | 1.40 (1.20, 1.61)      | 1.91 (1.71, 2.12)    | 1.04 (0.97, 1.12)    | <0.001 | 7.05 (6.59, 7.53)       | 10.20 (9.73, 10.67)     | 1.24 (1.00, 1.48)    | <0.001 | 20.80 (20.05, 21.57) | 17.51 (16.91, 18.13) | -0.57 (-0.73, -0.42) | <0.001 | 0.35 (0.26, 0.46)    | 0.29 (0.22, 0.38) | -0.59 (-0.79, -0.38) | <0.001 |
|                             | Southern Latin America | 2.78 (2.55, 3.04)    | 4.64 (4.39, 4.91)    |        | 1.78 (1.74, 1.82)       | 19.31 (18.68, 19.96)    | 33.61 (32.92, 34.32) |        | 1.97 (1.92, 2.02)    | 11.67 (11.19, 12.17) | 8.98 (8.62, 9.35)    |        | -0.89 (-1.17, -0.60) | 0.20 (0.14, 0.27) | 0.15 (0.11, 0.21)    |        |
| Oceania                     | 2.10 (1.55, 2.78)      | 2.13 (1.75, 2.56)    | 0.03 (-0.07, 0.13)   | 0.531  | 13.70 (12.19, 15.35)    | 13.67 (12.66, 14.74)    | -0.04 (-0.21, 0.13)  | 0.636  | 17.63 (16.05, 19.34) | 18.13 (17.01, 19.30) | 0.10 (-0.20, 0.40)   | 0.531  | 0.29 (0.12, 0.60)    | 0.29 (0.17, 0.48) | 0.06 (-0.46, 0.59)   | 0.814  |
|                             | Australasia            | 4.40 (3.96, 4.87)    | 11.58 (10.93, 12.26) |        | 3.39 (3.29, 3.49)       | 31.53 (30.35, 32.75)    | 89.92 (88.13, 91.73) |        | 3.68 (3.34, 4.01)    | 10.44 (9.75, 11.16)  | 6.88 (6.38, 7.41)    |        | -1.44 (-1.72, -1.15) | 0.18 (0.10, 0.29) | 0.12 (0.06, 0.21)    |        |
| <b>Women</b>                |                        |                      |                      |        |                         |                         |                      |        |                      |                      |                      |        |                      |                   |                      |        |
| Global                      | 9.01 (8.96, 9.07)      | 6.91 (6.87, 6.95)    | -0.92 (-0.97, -0.87) | <0.001 | 73.11 (72.94, 73.28)    | 54.20 (54.09, 54.31)    | -1.03 (-1.12, -0.94) | <0.001 | 10.22 (10.16, 10.28) | 8.33 (8.29, 8.38)    | -0.71 (-0.87, -0.55) | <0.001 | 0.17 (0.16, 0.18)    | 0.14 (0.13, 0.14) | -0.72 (-0.98, -0.46) | <0.001 |

|                              |                      | 6.95)          | -0.86)         |                              |                      | 54.32)                        | -0.94)         |                               |                      | -0.55)               |       |        | -0.47)            |                   |       |
|------------------------------|----------------------|----------------|----------------|------------------------------|----------------------|-------------------------------|----------------|-------------------------------|----------------------|----------------------|-------|--------|-------------------|-------------------|-------|
| <b>SDI category</b>          |                      |                |                |                              |                      |                               |                |                               |                      |                      |       |        |                   |                   |       |
| High                         | 36.53 (36.24, 36.83) | 37.94          | 0.10           | 0.044                        | 295.91               | 302.74                        | 0.05           | 0.364                         | 8.61 (8.46, 8.75)    | 6.58 (6.45, 6.70)    | -0.92 | <0.001 | 0.14 (0.12, 0.16) | 0.11 (0.09, 0.12) | -0.83 |
|                              |                      | (37.65, 38.24) | (0.00, 0.21)   |                              | (295.09, 296.73)     | (301.94, 303.55)              | (-0.06, 0.17)  |                               | (-1.15, -0.69)       | (-1.11, -0.55)       |       |        |                   |                   |       |
| High-middle                  | 9.57 (9.45, 9.70)    | 8.60           | -0.37          | <0.001                       | 75.75 (75.40, 76.10) | 66.13                         | -0.46          | <0.001                        | 7.86 (7.75, 7.97)    | 5.32 (5.23, 5.41)    | -1.34 | <0.001 | 0.13 (0.12, 0.15) | 0.09 (0.08, 0.10) | -1.26 |
|                              |                      | (8.49, 8.71)   | (-0.47, -0.26) |                              | (65.84, 66.43)       | (-0.57, -0.35)                | (-1.66, -1.03) |                               | (-1.90, -0.61)       |                      |       |        |                   |                   |       |
| Middle                       | 1.96 (1.91, 2.00)    | 1.86           | -0.21          | <0.001                       | 13.29 (13.16, 13.41) | 11.55                         | -0.49          | <0.001                        | 10.19 (10.09, 10.30) | 7.29 (7.21, 7.36)    | -1.13 | <0.001 | 0.17 (0.16, 0.18) | 0.12 (0.11, 0.13) | -1.19 |
|                              |                      | (1.82, 1.90)   | (-0.26, -0.15) |                              | (11.45, 11.64)       | (-0.64, -0.34)                | (-1.26, -1.00) |                               | (-1.49, -0.89)       |                      |       |        |                   |                   |       |
| Low-middle                   | 0.93 (0.89, 0.97)    | 0.93           | -0.01          | 0.903                        | 4.45 (4.35, 4.55)    | 4.20 (4.14, 4.27)             | -0.43          | 0.001                         | 11.33 (11.19, 11.48) | 9.86 (9.76, 9.97)    | -0.48 | <0.001 | 0.19 (0.17, 0.21) | 0.16 (0.15, 0.18) | -0.62 |
|                              |                      | (0.90, 0.97)   | (-0.18, 0.16)  |                              | (-0.69, -0.17)       | (-0.72, -0.25)                | (-0.98, -0.26) |                               |                      |                      |       |        |                   |                   |       |
| Low                          | 0.59 (0.54, 0.64)    | 0.63           | 0.20           | 0.020                        | 1.31 (1.23, 1.40)    | 1.50 (1.45, 1.56)             | 0.61           | 0.024                         | 15.75 (15.49, 16.00) | 12.35 (12.20, 12.50) | -0.83 | <0.001 | 0.26 (0.23, 0.30) | 0.20 (0.19, 0.22) | -0.97 |
|                              |                      | (0.59, 0.66)   | (0.03, 0.38)   |                              | (0.08, 1.14)         | (-0.92, -0.74)                | (-1.15, -0.78) |                               |                      |                      |       |        |                   |                   |       |
| <b>21 GBD region</b>         |                      |                |                |                              |                      |                               |                |                               |                      |                      |       |        |                   |                   |       |
| South Asia                   | 0.41 (0.38, 0.44)    | 0.51           | 0.74           | <0.001                       | —                    | 0.71 (0.68, 0.74)             | —              | —                             | 10.14 (10.00, 10.28) | 8.46 (8.37, 8.56)    | -0.66 | 0.004  | 0.17 (0.15, 0.19) | 0.14 (0.13, 0.15) | -0.60 |
|                              |                      | (0.49, 0.53)   | (0.49, 0.99)   |                              | (-1.11, -0.21)       | (-1.07, -0.12)                |                |                               |                      |                      |       |        |                   |                   |       |
| East Asia                    | 3.79 (3.71, 3.86)    | 4.56           | 0.63           | <0.001                       | 28.74 (28.53, 28.95) | 33.11                         | 0.47           | <0.001                        | 4.40 (4.32, 4.48)    | 2.04 (1.99, 2.10)    | -2.63 | <0.001 | 0.07 (0.06, 0.08) | 0.03 (0.03, 0.04) | -2.95 |
|                              |                      | (4.48, 4.64)   | (0.55, 0.71)   |                              | (0.34, 0.60)         | (-2.98, -2.29)                | (-3.93, -1.96) |                               |                      |                      |       |        |                   |                   |       |
| North Africa and Middle East | 2.48 (2.35, 2.61)    | 2.65           | 0.23           | <0.001                       | 17.68 (17.33, 18.04) | 18.81                         | 0.21           | 0.004                         | 31.23 (30.79, 31.67) | 19.59 (19.34, 19.84) | -1.57 | <0.001 | 0.52 (0.47, 0.59) | 0.33 (0.30, 0.36) | -1.57 |
|                              |                      | (2.57, 2.75)   | (0.15, 0.31)   |                              | (0.07, 0.35)         | (-1.67, -1.47)                | (-1.70, -1.43) |                               |                      |                      |       |        |                   |                   |       |
| Western Sub-Saharan Africa   | 0.59 (0.51, 0.68)    | 0.63           | 0.23           | 0.002                        | 1.76 (1.60, 1.93)    | 2.08 (1.97, 2.19)             | 0.53           | <0.001                        | 17.35 (16.92, 17.79) | 15.74 (15.49, 16.00) | -0.32 | <0.001 | 0.28 (0.23, 0.34) | 0.25 (0.22, 0.29) | -0.37 |
|                              |                      | (0.58, 0.69)   | (0.08, 0.38)   |                              | (0.36, 0.70)         | (-0.41, -0.24)                | (-0.58, -0.16) |                               |                      |                      |       |        |                   |                   |       |
| Southeast Asia               | 1.13 (1.06, 1.32)    | 0.52           | <0.001         | 6.63 (6.45, 8.08 (7.93, 0.65 | <0.001               | 4.40 (4.26, 3.25 (3.15, -1.03 | <0.001         | 0.07 (0.06, 0.05 (0.04, -0.99 | <0.001               |                      |       |        |                   |                   |       |

|                             |                      |                |                |        |                         |                         |                |        |                      |                      |                |        |                   |                   |                |        |
|-----------------------------|----------------------|----------------|----------------|--------|-------------------------|-------------------------|----------------|--------|----------------------|----------------------|----------------|--------|-------------------|-------------------|----------------|--------|
|                             | 1.20                 | (1.26, 1.39)   | (0.46, 0.58)   |        | 6.80                    | 8.23                    | (0.47, 0.83)   |        | 4.53                 | 3.34                 | (-1.16, -0.90) | 0.09   | 0.07              | (-0.99, -0.99)    |                |        |
| Eastern Sub-Saharan Africa  | 0.57 (0.49, 0.66)    | (0.47, 0.58)   | (-0.55, -0.13) | 0.002  | 0.98 (0.87, 1.11)       | 0.87 (0.80, 0.94)       | (-1.43, 1.00)  | 0.723  | 19.44 (18.97, 19.91) | 10.81 (10.58, 11.04) | (-2.17, -1.84) | <0.001 | 0.32 (0.27, 0.39) | 0.18 (0.15, 0.21) | (-2.38, -1.68) | <0.001 |
| Central America             | 0.88 (0.78, 0.99)    | (1.02, 1.20)   | (0.70, 0.90)   | <0.001 | 3.62 (3.40, 3.85)       | 3.77 (3.60, 3.94)       | (-0.02, 0.33)  | 0.077  | 10.55 (10.20, 10.91) | 8.21 (7.97, 8.47)    | (-1.36, -0.30) | 0.002  | 0.18 (0.14, 0.23) | 0.14 (0.11, 0.18) | (-1.70, -0.04) | 0.041  |
| Tropical Latin America      | 1.93 (1.77, 2.09)    | (1.69, 1.94)   | (-0.38, -0.14) | <0.001 | 12.26 (11.86, 12.67)    | 8.91 (8.65, 9.18)       | (-1.42, -0.93) | <0.001 | 30.01 (29.41, 30.63) | 13.64 (13.31, 13.98) | (-2.84, -2.63) | <0.001 | 0.51 (0.43, 0.60) | 0.23 (0.19, 0.28) | (-2.87, -2.64) | <0.001 |
| Central Sub-Saharan Africa  | 0.57 (0.42, 0.75)    | (0.43, 0.63)   | (-0.48, -0.21) | <0.001 | 0.66 (0.49, 0.86)       | 0.73 (0.61, 0.85)       | (0.19, 0.65)   | <0.001 | 13.08 (12.38, 13.82) | 9.21 (8.83, 9.60)    | (-1.36, -1.11) | <0.001 | 0.22 (0.13, 0.34) | 0.15 (0.11, 0.21) | (-1.41, -1.23) | <0.001 |
| Western Europe              | 10.38 (10.15, 10.62) | (10.95, 11.46) | (0.17, 0.36)   | <0.001 | 79.77 (79.13, 80.42)    | 86.85 (86.17, 87.53)    | (0.20, 0.38)   | <0.001 | 7.92 (7.71, 8.12)    | 5.39 (5.21, 5.57)    | (-1.55, -1.10) | <0.001 | 0.13 (0.11, 0.16) | 0.09 (0.07, 0.12) | (-1.68, -0.85) | <0.001 |
| High-income North America   | 70.12 (69.45, 70.79) | (71.45, 72.77) | (-0.08, 0.20)  | 0.388  | 566.86 (564.98, 568.74) | 583.45 (581.58, 585.31) | (-0.09, 0.21)  | 0.419  | 10.99 (10.73, 11.26) | 7.81 (7.59, 8.03)    | (-1.58, -0.72) | <0.001 | 0.18 (0.15, 0.22) | 0.12 (0.10, 0.16) | (-2.04, -0.66) | <0.001 |
| Central Asia                | 7.77 (7.31, 8.25)    | (8.20, 9.03)   | (0.33, 0.38)   | <0.001 | 61.02 (59.70, 62.37)    | 66.25 (65.11, 67.39)    | (0.22, 0.36)   | <0.001 | 3.84 (3.52, 4.18)    | 5.87 (5.52, 6.23)    | (0.84, 2.09)   | <0.001 | 0.06 (0.03, 0.12) | 0.09 (0.06, 0.15) | (0.45, 2.47)   | 0.004  |
| Eastern Europe              | 17.12 (16.74, 17.50) | (17.79, 18.66) | (0.18, 0.24)   | <0.001 | 135.41 (134.37, 136.46) | 142.55 (141.40, 143.70) | (0.14, 0.21)   | <0.001 | 2.59 (2.44, 2.75)    | 5.02 (4.78, 5.27)    | (1.50, 3.29)   | <0.001 | 0.04 (0.02, 0.06) | 0.08 (0.05, 0.12) | (2.15, 3.24)   | <0.001 |
| Southern Sub-Saharan Africa | 1.06 (0.87, 1.29)    | (0.76, 1.06)   | (-0.67, -0.50) | <0.001 | 5.45 (4.98, 5.96)       | 4.74 (4.42, 5.08)       | (-0.67, -0.29) | <0.001 | 30.87 (29.82, 31.96) | 13.31 (12.77, 13.87) | (-4.01, -1.48) | <0.001 | 0.52 (0.39, 0.68) | 0.22 (0.16, 0.31) | (-4.15, -1.70) | <0.001 |
| High-income Asia Pacific    | 44.13 (43.42, 44.85) | (45.74, 47.36) | (0.14, 0.22)   | <0.001 | 357.61 (355.59, 359.64) | 376.63 (374.40, 378.88) | (0.14, 0.22)   | <0.001 | 6.05 (5.79, 6.32)    | 2.96 (2.75, 3.17)    | (-2.73, -2.17) | <0.001 | 0.10 (0.07, 0.14) | 0.04 (0.02, 0.08) | (-3.22, -2.25) | <0.001 |
| Central Europe              | 15.29 (14.79, 15.79) | 20.65          | 1.03           | <0.001 | 119.27                  | 163.31                  | 1.09           | <0.001 | 6.81 (6.48, 7.14)    | 7.03 (6.64, 7.42)    | 0.11           | 0.198  | 0.11 (0.07, 0.15) | 0.12 (0.07, 0.17) | 0.22           | 0.008  |

|                        | Mean                 | 95% CI               | 95% CI               | P      | 95% CI                  | 95% CI                  | 95% CI            | 95% CI | 95% CI               | 95% CI               | P              | 95% CI | 95% CI            | 95% CI            | P              |        |
|------------------------|----------------------|----------------------|----------------------|--------|-------------------------|-------------------------|-------------------|--------|----------------------|----------------------|----------------|--------|-------------------|-------------------|----------------|--------|
| Andean Latin America   | 15.79                | (20.01, 21.31)       | (0.98, 1.09)         |        | (117.91, 120.65)        | (161.56, 165.07)        | (1.01, 1.17)      |        | 7.15                 | 7.43                 | (-0.06, 0.27)  | 0.17   | 0.18              | (0.06, 0.38)      |                |        |
|                        | 0.81 (0.62, 1.06)    | 1.10 (0.93, 1.30)    | 1.06 (0.93, 1.19)    | <0.001 | 3.17 (2.74, 3.64)       | 3.26 (2.96, 3.59)       | (-1.18, 1.74)     | 0.718  | 13.32 (12.52, 14.17) | 8.02 (7.54, 8.53)    | (-2.62, -0.97) | <0.001 | 0.22 (0.13, 0.36) | 0.13 (0.08, 0.21) | (-2.35, -1.73) | <0.001 |
|                        | 1.16 (0.92, 1.44)    | 1.30 (1.08, 1.55)    | 0.38 (0.29, 0.46)    | <0.001 | 6.27 (5.67, 6.92)       | 6.26 (5.76, 6.80)       | (-0.30, 0.23)     | 0.801  | 16.36 (15.45, 17.32) | 15.22 (14.43, 16.05) | (-0.40, -0.03) | 0.025  | 0.27 (0.16, 0.42) | 0.25 (0.16, 0.38) | (-0.42, 0.10)  | 0.224  |
| Southern Latin America | 3.00 (2.66, 3.37)    | 4.03 (3.69, 4.39)    | 1.00 (0.95, 1.05)    | <0.001 | 21.45 (20.52, 22.41)    | 27.77 (26.88, 28.67)    | 0.88 (0.63, 1.13) | <0.001 | 9.33 (8.73, 9.96)    | 6.42 (5.99, 6.87)    | (-1.57, -0.93) | <0.001 | 0.16 (0.09, 0.26) | 0.11 (0.06, 0.18) | (-1.41, -0.93) | <0.001 |
|                        | 2.67 (1.81, 3.82)    | 2.68 (2.08, 3.39)    | -0.05 (-0.22, 0.12)  | 0.546  | 19.08 (16.56, 21.89)    | 19.04 (17.37, 20.83)    | (-0.19, 0.07)     | 0.359  | 15.27 (13.16, 17.64) | 17.17 (15.63, 18.82) | (0.37, 0.50)   | <0.001 | 0.25 (0.05, 0.77) | 0.28 (0.12, 0.58) | (-0.17, 0.94)  | 0.173  |
| Australasia            | 4.70 (4.07, 5.41)    | 10.13 (9.28, 11.04)  | 2.68 (2.63, 2.74)    | <0.001 | 34.23 (32.50, 36.03)    | 78.70 (76.37, 81.10)    | 2.88 (2.71, 3.04) | <0.001 | 7.56 (6.75, 8.45)    | 4.99 (4.40, 5.65)    | (-1.42, -1.02) | <0.001 | 0.13 (0.04, 0.30) | 0.08 (0.02, 0.22) | (-2.29, -0.52) | 0.002  |
|                        | <b>Men</b>           |                      |                      |        |                         |                         |                   |        |                      |                      |                |        |                   |                   |                |        |
| Global                 | 6.71 (6.66, 6.76)    | 6.01 (5.97, 6.05)    | -0.37 (-0.43, -0.31) | <0.001 | 52.43 (52.29, 52.57)    | 45.92 (45.82, 46.03)    | (-0.45, -0.38)    | <0.001 | 11.40 (11.33, 11.46) | 9.36 (9.31, 9.41)    | (-0.66, -0.55) | <0.001 | 0.19 (0.18, 0.20) | 0.16 (0.15, 0.16) | (-1.05, -0.26) | 0.001  |
|                        | <b>SDI category</b>  |                      |                      |        |                         |                         |                   |        |                      |                      |                |        |                   |                   |                |        |
| High                   | 25.01 (24.77, 25.25) | 26.85 (26.62, 27.09) | 0.23 (0.19, 0.28)    | <0.001 | 199.43 (198.77, 200.10) | 212.09 (211.44, 212.74) | 0.20 (0.16, 0.24) | <0.001 | 15.25 (15.06, 15.43) | 9.15 (9.01, 9.29)    | (-1.75, -1.51) | <0.001 | 0.26 (0.24, 0.28) | 0.15 (0.14, 0.17) | (-2.53, -1.28) | <0.001 |
|                        | 7.75 (7.65, 7.87)    | 8.90 (8.80, 9.01)    | 0.49 (0.43, 0.54)    | <0.001 | 60.20 (59.90, 60.51)    | 68.56 (68.27, 68.86)    | 0.46 (0.39, 0.54) | <0.001 | 11.60 (11.47, 11.74) | 8.36 (8.26, 8.47)    | (-1.16, -0.84) | <0.001 | 0.19 (0.18, 0.21) | 0.14 (0.13, 0.16) | (-1.35, -0.70) | <0.001 |
| Middle                 | 1.77 (1.73, 1.82)    | 2.02 (1.98, 2.06)    | 0.47 (0.35, 0.60)    | <0.001 | 11.01 (10.90, 11.13)    | 11.67 (11.57, 11.76)    | 0.20 (0.14, 0.26) | <0.001 | 10.31 (10.21, 10.41) | 8.87 (8.78, 8.95)    | (-0.50, -0.44) | <0.001 | 0.17 (0.16, 0.19) | 0.15 (0.14, 0.16) | (-0.43, -0.43) | <0.001 |
|                        | 0.95 (0.91, 0.99)    | 1.06 (1.03, 1.06)    | 0.38 (0.26, 0.38)    | <0.001 | 3.52 (3.44, 3.61)       | 4.62 (4.55, 4.69)       | 0.90 (0.54, 0.90) | <0.001 | 9.32 (9.19, 9.46)    | 9.67 (9.56, 9.77)    | (0.18, -0.10)  | 0.206  | 0.16 (0.14, 0.18) | 0.16 (0.15, 0.18) | (-0.00, -0.52) | 0.991  |
| 45                     |                      |                      |                      |        |                         |                         |                   |        |                      |                      |                |        |                   |                   |                |        |

|                              |                   |                   |                     |        |                      |                      |                      |        |                      |                      |                      |        |                   |                   |                      |        |
|------------------------------|-------------------|-------------------|---------------------|--------|----------------------|----------------------|----------------------|--------|----------------------|----------------------|----------------------|--------|-------------------|-------------------|----------------------|--------|
|                              |                   | 1.10)             | 0.50)               |        |                      |                      | 1.26)                |        |                      |                      | 0.45)                |        |                   |                   | 0.52)                |        |
| Low                          | 0.72 (0.67, 0.78) | 0.80 (0.76, 0.84) | 0.31 (0.14, 0.47)   | <0.001 | 1.52 (1.44, 1.61)    | 2.54 (2.46, 2.61)    | 1.72 (0.80, 2.65)    | <0.001 | 12.02 (11.79, 12.25) | 11.20 (11.05, 11.34) | -0.23 (-0.45, -0.02) | 0.030  | 0.20 (0.17, 0.23) | 0.19 (0.17, 0.21) | -0.14 (-0.34, 0.05)  | 0.155  |
| <b>21 GBD region</b>         |                   |                   |                     |        |                      |                      |                      |        |                      |                      |                      |        |                   |                   |                      |        |
| South Asia                   | 0.56 (0.53, 0.59) | 0.72 (0.69, 0.75) | 0.87 (0.70, 1.03)   | <0.001 | —                    | 1.99 (1.94, 2.03)    | —                    | —      | 7.73 (7.61, 7.85)    | 8.44 (8.35, 8.53)    | 0.34 (-0.04, 0.73)   | 0.079  | 0.13 (0.12, 0.15) | 0.14 (0.13, 0.16) | 0.32 (-0.42, 1.07)   | 0.396  |
| East Asia                    | 2.85 (2.79, 2.91) | 3.55 (3.48, 3.62) | 0.75 (0.59, 0.91)   | <0.001 | 21.07 (20.89, 21.24) | 24.48 (24.30, 24.66) | 0.51 (0.38, 0.65)    | <0.001 | 6.04 (5.95, 6.13)    | 3.98 (3.90, 4.05)    | -1.47 (-1.91, -1.02) | <0.001 | 0.10 (0.09, 0.11) | 0.07 (0.06, 0.08) | -1.16 (-1.72, -0.60) | <0.001 |
| North Africa and Middle East | 1.88 (1.78, 2.00) | 2.22 (2.14, 2.30) | 0.58 (0.48, 0.68)   | <0.001 | 10.97 (10.69, 11.24) | 13.23 (13.04, 13.42) | 0.63 (0.41, 0.85)    | <0.001 | 27.13 (26.73, 27.52) | 19.32 (19.09, 19.56) | -1.13 (-1.29, -0.97) | <0.001 | 0.45 (0.40, 0.50) | 0.32 (0.29, 0.35) | -1.22 (-1.56, -0.88) | <0.001 |
| Western Sub-Saharan Africa   | 0.96 (0.85, 1.08) | 1.07 (0.99, 1.14) | 0.36 (0.26, 0.46)   | <0.001 | 3.28 (3.07, 3.51)    | 5.04 (4.88, 5.22)    | 1.38 (0.97, 1.80)    | <0.001 | 8.72 (8.40, 9.05)    | 8.93 (8.72, 9.15)    | 0.10 (-0.03, 0.23)   | 0.129  | 0.15 (0.11, 0.20) | 0.15 (0.12, 0.18) | 0.00 (-0.27, 0.27)   | 0.999  |
| Southeast Asia               | 0.98 (0.92, 1.05) | 1.17 (1.11, 1.23) | 0.62 (0.56, 0.67)   | <0.001 | 5.57 (5.41, 5.74)    | 6.87 (6.74, 7.01)    | 0.75 (0.63, 0.87)    | <0.001 | 4.40 (4.27, 4.54)    | 4.49 (4.38, 4.60)    | 0.08 (-0.14, 0.30)   | 0.469  | 0.08 (0.06, 0.10) | 0.08 (0.06, 0.09) | 0.44 (-0.35, 1.24)   | 0.276  |
| Eastern Sub-Saharan Africa   | 0.69 (0.59, 0.79) | 0.69 (0.63, 0.75) | -0.02 (-0.20, 0.16) | 0.820  | 1.36 (1.22, 1.51)    | 1.47 (1.37, 1.57)    | 0.19 (-0.27, 0.64)   | 0.418  | 18.23 (17.75, 18.71) | 13.59 (13.32, 13.85) | -1.01 (-1.20, -0.82) | <0.001 | 0.31 (0.25, 0.38) | 0.23 (0.19, 0.26) | -1.07 (-1.41, -0.74) | <0.001 |
| Central Latin America        | 0.70 (0.60, 0.80) | 1.51 (1.40, 1.62) | 2.73 (2.60, 2.86)   | <0.001 | 0.03 (0.01, 0.06)    | 4.98 (4.78, 5.18)    | 8.59 (5.81, 11.45)   | <0.001 | 13.44 (13.03, 13.86) | 10.58 (10.30, 10.87) | -0.84 (-1.13, -0.55) | <0.001 | 0.23 (0.18, 0.29) | 0.18 (0.14, 0.22) | -0.79 (-1.03, -0.55) | <0.001 |
| Tropical Latin America       | 1.35 (1.22, 1.49) | 1.48 (1.37, 1.59) | 0.30 (0.11, 0.48)   | 0.001  | 2.74 (2.54, 2.94)    | 4.26 (4.08, 4.45)    | 1.26 (0.89, 1.62)    | <0.001 | 37.43 (36.74, 38.13) | 16.87 (16.49, 17.25) | -2.68 (-3.10, -2.26) | <0.001 | 0.63 (0.55, 0.73) | 0.28 (0.24, 0.34) | -2.76 (-3.27, -2.25) | <0.001 |
| Central Sub-Saharan Africa   | 0.68 (0.52, 0.88) | 0.65 (0.55, 0.77) | -0.21 (-0.47, 0.05) | 0.112  | 2.00 (1.69, 2.34)    | 0.74 (0.62, 0.87)    | -3.04 (-4.18, -1.89) | <0.001 | 12.56 (11.86, 13.30) | 10.40 (9.99, 10.82)  | -0.70 (-1.00, -0.41) | <0.001 | 0.21 (0.13, 0.33) | 0.18 (0.13, 0.24) | -0.61 (-0.80, -0.42) | <0.001 |
| Western Europe               | 6.84 (6.65, 6.84) | 8.55 (8.55, 8.55) | 0.77 (0.77, 0.77)   | <0.001 | 51.17 (50.66, 51.17) | 64.95 (64.95, 64.95) | 0.82 (0.82, 0.82)    | <0.001 | 17.28 (16.98, 17.28) | 10.11 (9.88, 10.11)  | -1.90 (-1.90, -1.90) | <0.001 | 0.29 (0.26, 0.29) | 0.17 (0.14, 0.17) | -2.00 (-2.00, -2.00) | <0.001 |

|                  |               |         |         |        |               |             |         |        |               |               |         |        |             |             |         |        |
|------------------|---------------|---------|---------|--------|---------------|-------------|---------|--------|---------------|---------------|---------|--------|-------------|-------------|---------|--------|
|                  | 7.03)         | (8.33,  | (0.65,  |        | 51.69)        | (64.37,     | (0.66,  |        | 17.59)        | 10.35)        | (-2.14, |        | 0.33)       | 0.21)       | (-2.29, |        |
|                  |               | 8.76)   | 0.88)   |        |               | 65.53)      | 0.97)   |        |               |               | -1.65)  |        |             |             | (-1.71) |        |
| High-income      | 41.38 (40.87, | 43.71   | 0.15    |        | 331.00        | 351.16      | 0.16    |        | 19.71 (19.36, | 10.05 (9.80,  | -2.30   |        | 0.34 (0.29, | 0.17 (0.14, | -2.41   |        |
| North America    | 41.90)        | (43.20, | (0.05,  | 0.004  | (329.56,      | (349.71,    | (0.06,  | 0.002  | 20.07)        | 10.30)        | (-3.06, | <0.001 | 0.39)       | 0.20)       | (-3.21, | <0.001 |
|                  |               | 44.23)  | 0.25)   |        | 332.44)       | 352.60)     | 0.26)   |        |               |               | -1.53)  |        |             |             | (-1.61) |        |
|                  |               | 13.68   | 0.59    |        | 90.69 (89.05, | 107.28      | 0.59    |        | 4.35 (4.00,   | 7.17 (6.80,   | 1.71    |        | 0.07 (0.03, | 0.12 (0.07, | 1.43    |        |
| Central Asia     | 11.54 (10.97, | (13.16, | (0.57,  | <0.001 | 92.35)        | (105.84,    | (0.53,  | <0.001 | 4.71)         | 7.56)         | (0.88,  | <0.001 | 0.13)       | 0.18)       | (1.03,  | <0.001 |
|                  | 12.13)        | 14.20)  | 0.61)   |        |               | 108.74)     | 0.64)   |        |               |               | 2.55)   |        |             |             | (1.83)  |        |
|                  |               | 28.89   | 1.84    |        | 133.50        | 229.56      | 1.89    |        | 5.30 (5.09,   | 11.60 (11.25, | 2.84    |        | 0.09 (0.06, | 0.19 (0.15, | 2.86    |        |
| Eastern Europe   | 17.06 (16.68, | (28.35, | (1.80,  | <0.001 | (132.46,      | (228.11,    | (1.83,  | <0.001 | 5.52)         | 11.96)        | (1.42,  | <0.001 | 0.12)       | 0.25)       | (1.17,  | 0.001  |
|                  | 17.44)        | 29.44)  | 1.89)   |        | 134.54)       | 231.03)     | 1.96)   |        |               |               | 4.28)   |        |             |             | (4.59)  |        |
| Southern         |               | 4.45    | 3.95    |        | 5.50 (5.01,   | 26.17       | 5.56    |        | 27.82 (26.77, | 17.73 (17.10, | -1.61   |        | 0.48 (0.35, | 0.30 (0.22, | -1.58   |        |
| Sub-Saharan      | 1.44 (1.21,   | (4.14,  | (3.72,  | <0.001 | 6.03)         | (25.41,     | (5.13,  | <0.001 | 28.91)        | 18.38)        | (-2.08, | <0.001 | 0.64)       | 0.39)       | (-2.28, | <0.001 |
| Africa           | 1.71)         | 4.78)   | 4.18)   |        |               | 26.95)      | 5.99)   |        |               |               | -1.14)  |        |             |             | (-0.87) |        |
|                  |               | 50.87   | 0.62    |        | 343.08        | 409.06      | 0.63    |        | 10.21 (9.88,  | 4.85 (4.60,   | -2.52   |        | 0.17 (0.13, | 0.08 (0.05, | -2.79   |        |
| High-income Asia | 42.66 (41.97, | (50.06, | (0.57,  | <0.001 | (341.13,      | (406.81,    | (0.56,  | <0.001 | 10.56)        | 5.12)         | (-2.81, | <0.001 | 0.22)       | 0.12)       | (-3.09, | <0.001 |
| Pacific          | 43.36)        | 51.70)  | 0.66)   |        | 345.04)       | 411.32)     | 0.71)   |        |               |               | -2.23)  |        |             |             | (-2.50) |        |
|                  |               | 23.15   | 1.76    |        | 109.08        | 183.04      | 1.82    |        | 11.66 (11.24, | 13.11 (12.61, | 0.36    |        | 0.20 (0.15, | 0.22 (0.16, | 0.36    |        |
| Central Europe   | 13.99 (13.53, | (22.49, | (1.72,  | <0.001 | (107.79,      | (181.23,    | (1.78,  | <0.001 | 12.10)        | 13.64)        | (0.24,  | <0.001 | 0.26)       | 0.30)       | (0.02,  | 0.039  |
|                  | 14.47)        | 23.83)  | 1.80)   |        | 110.38)       | 184.87)     | 1.85)   |        |               |               | 0.48)   |        |             |             | (0.70)  |        |
|                  |               | 1.97    | 4.22    |        | —             | 9.54 (9.00, | —       | —      | 11.89 (11.11, | 10.61 (10.06, | -0.36   |        | 0.19 (0.11, | 0.17 (0.11, | -0.39   |        |
| Andean Latin     | 0.61 (0.44,   | (1.73,  | (3.89,  | <0.001 | 10.10)        | —           | —       | —      | 12.70)        | 11.19)        | (-0.68, | 0.029  | 0.33)       | 0.26)       | (-0.72, | 0.027  |
| America          | 0.83)         | 2.23)   | 4.56)   |        |               |             |         |        |               |               | -0.04)  |        |             |             | (-0.05) |        |
|                  |               | 2.54    | 1.47    |        | 7.88 (7.18,   | 14.28       | 2.08    |        | 25.51 (24.32, | 19.90 (18.99, | -0.83   |        | 0.43 (0.29, | 0.34 (0.23, | -0.80   |        |
| Caribbean        | 1.65 (1.35,   | (2.22,  | (1.40,  | <0.001 | 8.62)         | (13.50,     | (1.72,  | <0.001 | 26.74)        | 20.84)        | (-0.97, | <0.001 | 0.62)       | 0.48)       | (-1.03, | <0.001 |
|                  | 1.99)         | 2.89)   | 1.54)   |        |               | 15.09)      | 2.44)   |        |               |               | -0.70)  |        |             |             | (-0.57) |        |
|                  |               | 5.27    | 2.51    |        | 17.10 (16.26, | 39.59       | 3.02    |        | 14.08 (13.33, | 11.59 (11.01, | -0.64   |        | 0.24 (0.15, | 0.20 (0.13, | -0.65   |        |
| Southern Latin   | 2.56 (2.25,   | (4.88,  | (2.44,  | <0.001 | 17.98)        | (38.52,     | (2.83,  | <0.001 | 14.87)        | 12.19)        | (-0.89, | <0.001 | 0.37)       | 0.29)       | (-0.97, | <0.001 |
| America          | 2.91)         | 5.68)   | 2.58)   |        |               | 40.69)      | 3.21)   |        |               |               | -0.38)  |        |             |             | (-0.33) |        |
|                  |               | 1.58    | 0.02    |        | 8.56 (6.91,   | 8.30 (7.19, | -0.16   |        | 19.84 (17.53, | 18.91 (17.33, | -0.18   |        | 0.32 (0.09, | 0.30 (0.13, | -0.22   |        |
| Oceania          | 1.55 (0.93,   | (1.13,  | (-0.12, | 0.798  | 10.49)        | 9.52)       | (-0.40, | 0.177  | 22.39)        | 20.60)        | (-0.47, | 0.232  | 0.84)       | 0.60)       | (-0.43, | 0.040  |
|                  | 2.45)         | 2.15)   | 0.16)   |        |               |             | 0.07)   |        |               |               | 0.11)   |        |             |             | (-0.01) |        |
| Australasia      | 4.09 (3.50,   | 13.05   | 4.10    | <0.001 | 28.81 (27.21, | 101.42      | 4.39    | <0.001 | 13.31 (12.22, | 8.79 (7.99,   | -1.38   | <0.001 | 0.23 (0.11, | 0.15 (0.06, | -1.46   | <0.001 |

|                                | Rate (95% CI)        | Rate (95% CI)        | Rate (95% CI)        | Rate (95% CI)        | Rate (95% CI)     | Rate (95% CI)        | Rate (95% CI)        | Rate (95% CI)        | Rate (95% CI)        | Rate (95% CI)        | Rate (95% CI)           | Rate (95% CI)        | Rate (95% CI)     | Rate (95% CI)     | Rate (95% CI)     | Rate (95% CI)  |        |
|--------------------------------|----------------------|----------------------|----------------------|----------------------|-------------------|----------------------|----------------------|----------------------|----------------------|----------------------|-------------------------|----------------------|-------------------|-------------------|-------------------|----------------|--------|
| Cardiomyopathy and myocarditis | 4.75)                | (12.08, 14.09)       | (4.01, 4.20)         |                      | 30.47)            | (98.73, 104.18)      | (4.04, 4.75)         |                      | 14.47)               | 9.65)                | (-1.78, -0.97)          |                      | 0.43)             | 0.31)             | (-2.17, -0.75)    |                |        |
|                                | <b>Overall</b>       |                      |                      |                      |                   |                      |                      |                      |                      |                      |                         |                      |                   |                   |                   |                |        |
|                                | Global               | 11.79 (11.74, 11.83) | 11.12 (11.09, 11.16) | -0.20 (-0.22, -0.19) | <0.001            | 6.19 (6.16, 6.22)    | 4.59 (4.56, 4.61)    | -0.98 (-1.23, -0.72) | <0.001               | 55.45 (55.35, 55.55) | 53.87 (53.79, 53.96)    | -0.11 (-0.68, 0.46)  | 0.701             | 0.93 (0.91, 0.94) | 0.91 (0.90, 0.92) | (-0.70, 0.55)  | 0.812  |
| SDI category                   |                      |                      |                      |                      |                   |                      |                      |                      |                      |                      |                         |                      |                   |                   |                   |                |        |
|                                | High                 | 13.71 (13.58, 13.84) | 13.24 (13.11, 13.36) | -0.12 (-0.14, -0.10) | <0.001            | 38.06 (37.85, 38.27) | 39.21 (39.00, 39.42) | 0.15 (-0.06, 0.36)   | 0.157                | 77.03 (76.73, 77.33) | 54.67 (54.42, 54.92)    | -1.18 (-1.31, -1.05) | <0.001            | 1.20 (1.16, 1.24) | 0.82 (0.79, 0.86) | (-1.54, -1.13) | <0.001 |
|                                | High-middle          | 12.07 (11.97, 12.16) | 11.53 (11.44, 11.63) | -0.15 (-0.17, -0.14) | <0.001            | 0.69 (0.67, 0.71)    | 0.49 (0.47, 0.51)    | -1.17 (-1.85, -0.48) | 0.001                | 98.56 (98.28, 98.84) | 134.57 (134.27, 134.87) | 1.10 (0.31, 1.90)    | 0.006             | 1.70 (1.66, 1.74) | 2.37 (2.33, 2.41) | (0.38, 2.02)   | 0.004  |
| Middle                         | 11.60 (11.52, 11.68) | 10.89 (10.82, 10.95) | -0.22 (-0.24, -0.20) | <0.001               | 0.01 (0.01, 0.01) | 0.01 (0.01, 0.01)    | — —                  | — —                  | 34.96 (34.82, 35.09) | 30.74 (30.63, 30.85) | -0.43 (-0.50, -0.36)    | <0.001               | 0.58 (0.56, 0.59) | 0.50 (0.49, 0.52) | (-0.61, -0.44)    | <0.001         |        |
| Low-middle                     | 10.95 (10.85, 11.05) | 10.74 (10.66, 10.81) | -0.07 (-0.08, -0.06) | <0.001               | —                 | —                    | —                    | —                    | 25.98 (25.83, 26.14) | 25.82 (25.71, 25.94) | 0.02 (-0.13, 0.16)      | 0.834                | 0.43 (0.41, 0.45) | 0.43 (0.42, 0.45) | (-0.12, 0.08)     | 0.732          |        |
| Low                            | 10.49 (10.34, 10.64) | 10.43 (10.33, 10.52) | -0.02 (-0.02, -0.02) | <0.001               | —                 | —                    | —                    | —                    | 42.70 (42.39, 43.00) | 38.99 (38.80, 39.18) | -0.31 (-0.44, -0.18)    | <0.001               | 0.72 (0.68, 0.76) | 0.65 (0.63, 0.68) | (-0.46, -0.24)    | <0.001         |        |
| <b>21 GBD region</b>           |                      |                      |                      |                      |                   |                      |                      |                      |                      |                      |                         |                      |                   |                   |                   |                |        |
| South Asia                     | 11.05 (10.95, 11.15) | 11.04 (10.97, 11.12) | -0.00 (-0.01, 0.00)  | 0.126                | —                 | —                    | —                    | —                    | 9.21 (9.12, 9.30)    | 9.15 (9.08, 9.22)    | -0.04 (-0.33, 0.26)     | 0.794                | 0.15 (0.14, 0.16) | 0.15 (0.14, 0.16) | (-0.47, 0.55)     | 0.878          |        |
| East Asia                      | 12.82 (12.72, 12.91) | 11.96 (11.86, 12.05) | -0.25 (-0.28, -0.21) | <0.001               | —                 | —                    | —                    | —                    | 29.16 (29.02, 29.31) | 25.80 (25.66, 25.94) | -0.42 (-0.91, 0.08)     | 0.100                | 0.47 (0.45, 0.49) | 0.41 (0.40, 0.43) | (-0.86, 0.00)     | 0.050          |        |
| North Africa and Middle East   | 8.90 (8.74, 9.06)    | 8.92 (8.80, 9.04)    | 0.01 (0.00, 0.02)    | 0.019                | 0.25 (0.22, 0.28) | 0.07 (0.06, 0.08)    | -3.65 (-5.36, -1.94) | <0.001               | 43.40 (43.05, 43.76) | 31.41 (31.20, 31.63) | -1.10 (-1.25, -0.95)    | <0.001               | 0.69 (0.65, 0.74) | 0.49 (0.47, 0.52) | (-1.18, -1.31)    | <0.001         |        |
| 48                             |                      |                      |                      |                      |                   |                      |                      |                      |                      |                      |                         |                      |                   |                   |                   |                |        |



|                             |                      | 9.03)                | 0.02)                |        |                      |                         | -1.90)               |        |                         |                         | -0.94)               |        |                   |                      | -1.05)               |
|-----------------------------|----------------------|----------------------|----------------------|--------|----------------------|-------------------------|----------------------|--------|-------------------------|-------------------------|----------------------|--------|-------------------|----------------------|----------------------|
| Western Sub-Saharan Africa  | 10.53 (10.28, 10.78) | 10.47 (10.32, 10.63) | -0.02 (-0.02, -0.02) | <0.001 | —                    | —                       | —                    | —      | 72.92 (72.27, 73.58)    | 56.31 (55.95, 56.67)    | -0.89 (-1.05, -0.72) | <0.001 | 1.21 (1.13, 1.30) | 0.93 (0.88, 0.98)    | -0.90 (-1.06, -0.75) |
| Southeast Asia              | 10.73 (10.59, 10.88) | 10.82 (10.70, 10.95) | 0.03 (0.03, 0.03)    | <0.001 | —                    | 0.03 (0.02, 0.03)       | —                    | —      | 36.51 (36.23, 36.78)    | 37.07 (36.84, 37.29)    | 0.06 (-0.07, 0.19)   | 0.367  | 0.61 (0.58, 0.65) | 0.62 (0.59, 0.65)    | 0.13 (-0.07, 0.33)   |
| Eastern Sub-Saharan Africa  | 10.41 (10.17, 10.66) | 10.44 (10.28, 10.60) | 0.01 (0.01, 0.01)    | <0.001 | —                    | —                       | —                    | —      | 48.31 (47.76, 48.87)    | 44.51 (44.17, 44.86)    | -0.29 (-0.44, -0.14) | <0.001 | 0.83 (0.76, 0.91) | 0.76 (0.72, 0.81)    | -0.30 (-0.51, -0.09) |
| Central Latin America       | 9.72 (9.48, 9.97)    | 9.72 (9.53, 9.91)    | 0.00 (-0.01, 0.01)   | 0.947  | —                    | —                       | —                    | —      | 24.00 (23.62, 24.39)    | 21.92 (21.63, 22.21)    | -0.30 (-0.52, -0.09) | 0.006  | 0.40 (0.35, 0.45) | 0.36 (0.32, 0.40)    | -0.28 (-0.67, 0.11)  |
| Tropical Latin America      | 10.22 (9.97, 10.47)  | 10.23 (10.02, 10.44) | 0.00 (0.00, 0.00)*   | <0.001 | —                    | —                       | —                    | —      | 114.55 (113.70, 115.41) | 82.87 (82.29, 83.47)    | -1.13 (-1.37, -0.89) | <0.001 | 1.97 (1.86, 2.09) | 1.41 (1.33, 1.49)    | -1.16 (-1.33, -0.99) |
| Central Sub-Saharan Africa  | 10.06 (9.62, 10.51)  | 10.06 (9.78, 10.35)  | 0.00 (0.00, 0.00)*   | <0.001 | —                    | —                       | —                    | —      | 80.62 (79.34, 81.92)    | 77.32 (76.53, 78.12)    | -0.20 (-0.32, -0.07) | 0.002  | 1.36 (1.20, 1.54) | 1.31 (1.20, 1.42)    | -0.18 (-0.38, 0.01)  |
| Western Europe              | 12.78 (12.60, 12.97) | 12.80 (12.61, 13.00) | 0.00 (-0.02, 0.02)   | 0.873  | 1.34 (1.28, 1.40)    | 0.30 (0.27, 0.33)       | -4.51 (-6.18, -2.82) | <0.001 | 52.90 (52.53, 53.28)    | 29.79 (29.50, 30.08)    | -1.98 (-2.22, -1.74) | <0.001 | 0.85 (0.80, 0.90) | 0.47 (0.44, 0.51)    | -2.10 (-2.22, -1.99) |
| High-income North America   | 14.04 (13.82, 14.26) | 14.00 (13.79, 14.21) | -0.00 (-0.05, 0.05)  | 0.910  | 98.79 (98.23, 99.36) | 104.56 (103.99, 105.13) | 0.25 (0.02, 0.48)    | 0.037  | 110.14 (109.54, 110.75) | 88.28 (87.76, 88.81)    | -0.77 (-0.96, -0.57) | <0.001 | 1.67 (1.60, 1.75) | 1.29 (1.23, 1.35)    | -0.91 (-1.16, -0.67) |
| Central Asia                | 11.52 (11.12, 11.92) | 11.56 (11.22, 11.91) | 0.01 (0.01, 0.02)    | <0.001 | 0.75 (0.64, 0.87)    | 0.66 (0.58, 0.75)       | -0.47 (-0.72, -0.22) | <0.001 | 104.61 (103.40, 105.84) | 201.60 (200.20, 203.02) | 2.15 (1.28, 3.03)    | <0.001 | 1.79 (1.63, 1.96) | 3.53 (3.34, 3.72)    | 2.24 (1.42, 3.07)    |
| Eastern Europe              | 13.50 (13.25, 13.75) | 13.53 (13.25, 13.81) | 0.01 (0.00, 0.01)    | <0.001 | 1.47 (1.39, 1.54)    | 1.31 (1.24, 1.38)       | -0.40 (-0.75, -0.05) | 0.025  | 311.85 (310.71, 312.99) | 704.57 (702.74, 706.40) | 2.90 (1.96, 3.86)    | <0.001 | 5.49 (5.34, 5.64) | 12.56 (12.32, 12.81) | 2.95 (2.02, 3.90)    |
| Southern Sub-Saharan Africa | 10.78 (10.33, 11.23) | 10.82 (10.47, 11.17) | 0.02 (0.01, 0.03)    | <0.001 | —                    | —                       | —                    | —      | 89.76 (88.45, 91.08)    | 69.34 (68.45, 70.23)    | -1.00 (-1.58, -0.42) | 0.001  | 1.52 (1.35, 1.71) | 1.16 (1.04, 1.28)    | -0.90 (-1.62, -0.18) |



|                              |                      |                   |                        |        |   |   |   |   |                      |                      |                      |        |                   |                   |                      |        |
|------------------------------|----------------------|-------------------|------------------------|--------|---|---|---|---|----------------------|----------------------|----------------------|--------|-------------------|-------------------|----------------------|--------|
| Middle                       | 8.91 (8.81, 9.01)    | 8.41 (8.32, 8.49) | -0.21 (-0.22, -0.19)   | <0.001 | — | — | — | — | 26.30 (26.13, 26.47) | 19.47 (19.34, 19.59) | -0.98 (-1.15, -0.82) | <0.001 | 0.43 (0.41, 0.46) | 0.32 (0.30, 0.33) | -1.06 (-1.19, -0.92) | <0.001 |
|                              | 9.01 (8.89, 9.14)    | 8.87 (8.78, 8.97) | -0.06 (-0.07, -0.05)   | <0.001 | — | — | — | — | 20.42 (20.23, 20.62) | 17.25 (17.12, 17.39) | -0.55 (-0.65, -0.45) | <0.001 | 0.34 (0.32, 0.37) | 0.29 (0.27, 0.31) | -0.53 (-0.69, -0.38) | <0.001 |
| Low                          | 8.81 (8.62, 9.01)    | 8.77 (8.64, 8.90) | -0.02 (-0.02, -0.01)   | <0.001 | — | — | — | — | 31.03 (30.66, 31.40) | 24.03 (23.82, 24.24) | -0.87 (-0.96, -0.79) | <0.001 | 0.53 (0.48, 0.58) | 0.40 (0.38, 0.43) | -0.98 (-1.14, -0.81) | <0.001 |
|                              | <b>21 GBD region</b> |                   |                        |        |   |   |   |   |                      |                      |                      |        |                   |                   |                      |        |
| South Asia                   | 9.27 (9.14, 9.40)    | 9.27 (9.18, 9.37) | 0.00 (0.00, 0.00)*     | <0.001 | — | — | — | — | 7.11 (6.99, 7.23)    | 6.09 (6.01, 6.17)    | -0.54 (-0.88, -0.20) | 0.002  | 0.12 (0.10, 0.13) | 0.10 (0.09, 0.11) | -0.68 (-1.00, -0.36) | <0.001 |
|                              | 9.47 (9.36, 9.59)    | 8.42 (8.30, 8.54) | -0.42 (-0.44, -0.39)   | <0.001 | — | — | — | — | 21.68 (21.51, 21.86) | 16.12 (15.96, 16.29) | -1.10 (-1.65, -0.54) | <0.001 | 0.35 (0.32, 0.37) | 0.25 (0.23, 0.27) | -1.19 (-1.93, -0.45) | 0.002  |
| North Africa and Middle East | 7.08 (6.88, 7.29)    | 7.07 (6.92, 7.22) | -0.00 (-0.01, 0.00)    | 0.236  | — | — | — | — | 32.43 (31.99, 32.87) | 21.20 (20.94, 21.45) | -1.46 (-1.60, -1.33) | <0.001 | 0.52 (0.47, 0.58) | 0.34 (0.31, 0.37) | -1.50 (-1.61, -1.39) | <0.001 |
|                              | 8.90 (8.59, 9.23)    | 8.91 (8.71, 9.11) | 0.01 (0.01, 0.01)      | <0.001 | — | — | — | — | 62.43 (61.57, 63.30) | 39.88 (39.46, 40.31) | -1.55 (-1.68, -1.42) | <0.001 | 1.07 (0.96, 1.19) | 0.68 (0.62, 0.73) | -1.56 (-1.72, -1.41) | <0.001 |
| Southeast Asia               | 7.95 (7.78, 8.13)    | 7.95 (7.80, 8.11) | 0.00 (-0.01, 0.01)     | 0.853  | — | — | — | — | 27.15 (26.81, 27.48) | 24.15 (23.89, 24.41) | -0.40 (-0.51, -0.29) | <0.001 | 0.45 (0.41, 0.50) | 0.40 (0.37, 0.44) | -0.38 (-0.50, -0.25) | <0.001 |
|                              | 8.84 (8.53, 9.16)    | 8.84 (8.64, 9.05) | 0.0006 (-0.003, 0.004) | 0.752  | — | — | — | — | 24.69 (24.14, 25.24) | 19.13 (18.82, 19.45) | -0.87 (-0.98, -0.76) | <0.001 | 0.42 (0.35, 0.50) | 0.32 (0.28, 0.37) | -0.88 (-1.09, -0.67) | <0.001 |
| Central Latin America        | 8.15 (7.85, 8.47)    | 8.13 (7.89, 8.38) | -0.01 (-0.02, -0.00)   | 0.018  | — | — | — | — | 16.50 (16.06, 16.95) | 14.02 (13.69, 14.34) | -0.53 (-0.91, -0.15) | 0.006  | 0.27 (0.22, 0.33) | 0.23 (0.19, 0.27) | -0.52 (-0.83, -0.20) | 0.001  |
|                              | 8.58 (8.26, 8.91)    | 8.57 (8.31, 8.84) | -0.00 (-0.00, 0.00)    | <0.001 | — | — | — | — | 73.85 (72.89, 74.81) | 43.97 (43.37, 44.59) | -1.78 (-2.00, -1.56) | <0.001 | 1.26 (1.14, 1.39) | 0.74 (0.66, 0.82) | -1.83 (-2.12, -1.54) | <0.001 |



|                      |                      |                |                |        |                      |                      |                      |        |                         |                         |                |        |                   |                   |                |        |
|----------------------|----------------------|----------------|----------------|--------|----------------------|----------------------|----------------------|--------|-------------------------|-------------------------|----------------|--------|-------------------|-------------------|----------------|--------|
|                      |                      | 6.72)          | 0.00)*         |        |                      |                      |                      |        |                         |                         | -1.06)         |        |                   |                   | -0.93)         |        |
|                      |                      | 8.12           | 0.00           |        |                      |                      |                      |        |                         |                         | 0.22           |        |                   |                   | 0.14           |        |
| Oceania              | 8.12 (6.61, 9.90)    | (7.07, 9.28)   | (0.00, 0.00)*  | <0.001 | —                    | —                    | —                    | —      | 38.88 (35.36, 42.66)    | 41.11 (38.67, 43.66)    | (0.12, 0.31)   | <0.001 | 0.67 (0.28, 1.37) | 0.70 (0.42, 1.11) | (0.01, 0.26)   | 0.032  |
|                      |                      | 7.21           | -0.02          |        |                      |                      |                      |        |                         |                         | -2.82          |        |                   |                   | -2.89          |        |
| Australasia          | 7.21 (6.41, 8.08)    | (6.43, 7.96)   | (-0.04, -0.01) | 0.002  | —                    | —                    | —                    | —      | 51.47 (49.30, 53.72)    | 22.49 (21.20, 23.85)    | (-3.30, -2.34) | <0.001 | 0.81 (0.56, 1.14) | 0.35 (0.21, 0.57) | (-3.39, -2.38) | <0.001 |
| <b>Men</b>           |                      |                |                |        |                      |                      |                      |        |                         |                         |                |        |                   |                   |                |        |
|                      |                      | 14.73          | -0.25          |        |                      |                      |                      |        |                         |                         | 0.10           |        |                   |                   | 0.17           |        |
| Global               | 14.73 (14.66, 14.80) | (13.63, 13.75) | (-0.26, -0.24) | <0.001 | 7.58 (7.52, 7.63)    | 5.91 (5.87, 5.95)    | -0.82 (-1.04, -0.60) | <0.001 | 76.30 (76.14, 76.47)    | 78.20 (78.06, 78.34)    | (-0.39, 0.59)  | 0.690  | 1.28 (1.26, 1.31) | 1.34 (1.32, 1.35) | (-0.30, 0.64)  | 0.473  |
| <b>SDI category</b>  |                      |                |                |        |                      |                      |                      |        |                         |                         |                |        |                   |                   |                |        |
|                      |                      | 18.68          | -0.14          |        |                      |                      |                      |        |                         |                         | -1.25          |        |                   |                   | -1.40          |        |
| High                 | 18.68 (18.47, 18.89) | (17.75, 18.15) | (-0.16, -0.11) | <0.001 | 45.89 (45.57, 46.21) | 48.90 (48.57, 49.22) | 0.25 (0.05, 0.45)    | 0.013  | 107.22 (106.72, 107.72) | 74.50 (74.10, 74.91)    | (-1.41, -1.09) | <0.001 | 1.70 (1.64, 1.77) | 1.14 (1.10, 1.19) | (-1.55, -1.24) | <0.001 |
|                      |                      | 15.52          | -0.18          |        |                      |                      |                      |        |                         |                         | 1.17           |        |                   |                   | 1.25           |        |
| High-middle          | 15.52 (15.37, 15.68) | (14.60, 14.90) | (-0.18, -0.17) | <0.001 | 1.18 (1.14, 1.23)    | 0.81 (0.78, 0.84)    | -1.45 (-2.32, -0.57) | 0.001  | 145.61 (145.14, 146.09) | 203.68 (203.17, 204.20) | (0.35, 1.99)   | 0.005  | 2.52 (2.46, 2.59) | 3.60 (3.53, 3.67) | (0.44, 2.07)   | 0.002  |
|                      |                      | 14.22          | -0.23          |        |                      |                      |                      |        |                         |                         | -0.12          |        |                   |                   | -0.16          |        |
| Middle               | 14.22 (14.10, 14.34) | (13.21, 13.42) | (-0.25, -0.21) | <0.001 | 0.01 (0.01, 0.02)    | 0.02 (0.01, 0.02)    | —                    | —      | 43.37 (43.15, 43.58)    | 41.83 (41.64, 42.01)    | (-0.23, -0.01) | 0.036  | 0.71 (0.69, 0.74) | 0.69 (0.67, 0.71) | (-0.36, 0.05)  | 0.136  |
|                      |                      | 12.84          | -0.07          |        |                      |                      |                      |        |                         |                         | 0.35           |        |                   |                   | 0.36           |        |
| Low-middle           | 12.84 (12.69, 12.99) | (12.48, 12.71) | (-0.08, -0.06) | <0.001 | —                    | 0.01 (0.01, 0.01)    | —                    | —      | 31.42 (31.18, 31.66)    | 34.34 (34.15, 34.53)    | (0.26, 0.44)   | <0.001 | 0.52 (0.49, 0.55) | 0.57 (0.55, 0.60) | (0.23, 0.48)   | <0.001 |
|                      |                      | 12.20          | -0.02          |        |                      |                      |                      |        |                         |                         | -0.01          |        |                   |                   | -0.06          |        |
| Low                  | 12.20 (11.98, 12.43) | (11.98, 12.28) | (-0.02, -0.02) | <0.001 | —                    | —                    | —                    | —      | 54.59 (54.10, 55.08)    | 54.36 (54.04, 54.69)    | (-0.18, 0.16)  | 0.942  | 0.92 (0.85, 0.98) | 0.91 (0.87, 0.95) | (-0.14, 0.02)  | 0.141  |
| <b>21 GBD region</b> |                      |                |                |        |                      |                      |                      |        |                         |                         |                |        |                   |                   |                |        |
|                      |                      | 12.72          | 0.01           |        |                      |                      |                      |        |                         |                         | 0.33           |        |                   |                   | 0.43           |        |
| South Asia           | 12.72 (12.57, 12.88) | (12.63, 12.85) | (0.01, 0.01)   | <0.001 | —                    | —                    | —                    | —      | 11.18 (11.04, 11.32)    | 12.09 (11.98, 12.20)    | (-0.05, 0.71)  | 0.090  | 0.18 (0.17, 0.20) | 0.20 (0.18, 0.21) | (-0.11, 0.97)  | 0.121  |
|                      |                      | 15.98          | -0.16          |        |                      |                      |                      |        |                         |                         | -0.08          |        |                   |                   | -0.04          |        |
| East Asia            | 15.98 (15.83, 16.12) | (15.09, 15.25) | (-0.17, -0.02) | <0.001 | —                    | —                    | —                    | —      | 36.22 (36.00, 36.44)    | 34.94 (34.72, 35.17)    | (-0.39, 0.16)  | 0.602  | 0.58 (0.55, 0.61) | 0.57 (0.54, 0.60) | (-0.23, 0.02)  | 0.716  |

|                              |                      |                      |                       |        |                         |                         |                      |        |                         |                            |                      |        |                   |                      |                      |        |
|------------------------------|----------------------|----------------------|-----------------------|--------|-------------------------|-------------------------|----------------------|--------|-------------------------|----------------------------|----------------------|--------|-------------------|----------------------|----------------------|--------|
|                              |                      | 15.40)               | -0.15)                |        |                         |                         |                      |        |                         |                            | 0.23)                |        |                   |                      | 0.16)                |        |
| North Africa and Middle East | 10.63 (10.38, 10.88) | 10.62 (10.44, 10.79) | -0.00 (-0.01, 0.00)   | 0.255  | 0.48 (0.43, 0.54)       | 0.13 (0.11, 0.15)       | -3.99 (-5.53, -2.43) | <0.001 | 53.83 (53.28, 54.39)    | 40.82 (40.48, 41.16)       | -0.96 (-1.18, -0.73) | <0.001 | 0.85 (0.78, 0.92) | 0.64 (0.60, 0.68)    | -0.95 (-1.20, -0.69) | <0.001 |
| Western Sub-Saharan Africa   | 12.25 (11.87, 12.63) | 12.20 (11.96, 12.45) | -0.01 (-0.02, -0.01)  | <0.001 | —                       | —                       | —                    | —      | 84.54 (83.55, 85.53)    | 74.26 (73.67, 74.86)       | -0.43 (-0.60, -0.25) | <0.001 | 1.38 (1.25, 1.51) | 1.21 (1.13, 1.29)    | -0.45 (-0.70, -0.20) | <0.001 |
| Southeast Asia               | 13.60 (13.37, 13.84) | 13.63 (13.44, 13.83) | 0.01 (0.01, 0.01)     | <0.001 | —                       | 0.05 (0.04, 0.07)       | —                    | —      | 46.11 (45.67, 46.56)    | 49.75 (49.38, 50.12)       | 0.30 (0.13, 0.46)    | <0.001 | 0.78 (0.72, 0.84) | 0.83 (0.79, 0.88)    | 0.25 (0.08, 0.42)    | 0.004  |
| Eastern Sub-Saharan Africa   | 12.11 (11.73, 12.51) | 12.13 (11.88, 12.38) | 0.01 (0.00, 0.01)     | 0.003  | —                       | —                       | —                    | —      | 73.95 (72.96, 74.95)    | 71.54 (70.92, 72.17)       | -0.12 (-0.27, 0.04)  | 0.138  | 1.27 (1.15, 1.41) | 1.23 (1.15, 1.31)    | -0.10 (-0.30, 0.09)  | 0.308  |
| Central Latin America        | 11.39 (11.02, 11.77) | 11.37 (11.07, 11.67) | -0.01 (-0.01, -0.00)  | <0.001 | —                       | —                       | —                    | —      | 31.98 (31.35, 32.62)    | 30.20 (29.71, 30.69)       | -0.17 (-0.34, -0.00) | 0.049  | 0.53 (0.45, 0.62) | 0.50 (0.44, 0.57)    | -0.17 (-0.52, 0.17)  | 0.326  |
| Tropical Latin America       | 11.92 (11.53, 12.31) | 11.91 (11.59, 12.23) | -0.00 (-0.00, -0.00)* | <0.001 | —                       | —                       | —                    | —      | 156.91 (155.48, 158.35) | 122.69 (121.67, 123.71)    | -0.87 (-1.05, -0.68) | <0.001 | 2.72 (2.53, 2.91) | 2.09 (1.96, 2.23)    | -0.94 (-1.13, -0.75) | <0.001 |
| Central Sub-Saharan Africa   | 11.64 (10.97, 12.35) | 11.64 (11.22, 12.08) | 0.00 (0.00, 0.00)*    | <0.001 | —                       | —                       | —                    | —      | 99.84 (97.82, 101.90)   | 101.39 (100.10, 102.69)    | 0.03 (-0.09, 0.16)   | 0.580  | 1.69 (1.43, 1.98) | 1.72 (1.55, 1.90)    | 0.04 (-0.08, 0.15)   | 0.520  |
| Western Europe               | 17.68 (17.38, 17.99) | 17.74 (17.42, 18.07) | 0.01 (-0.01, 0.02)    | 0.394  | 2.19 (2.08, 2.30)       | 0.58 (0.53, 0.64)       | -4.17 (-6.03, -2.28) | <0.001 | 76.54 (75.91, 77.18)    | 44.84 (44.34, 45.35)       | -1.86 (-2.13, -1.59) | <0.001 | 1.24 (1.16, 1.32) | 0.72 (0.66, 0.79)    | -1.88 (-2.17, -1.58) | <0.001 |
| High-income North America    | 19.14 (18.78, 19.50) | 19.33 (18.98, 19.68) | 0.04 (-0.00, 0.09)    | 0.061  | 114.89 (114.03, 115.76) | 130.60 (129.71, 131.50) | 0.47 (0.25, 0.70)    | <0.001 | 152.68 (151.68, 153.68) | 116.98 (116.13, 117.83)    | -0.95 (-1.11, -0.78) | <0.001 | 2.38 (2.26, 2.51) | 1.74 (1.64, 1.85)    | -1.10 (-1.41, -0.78) | <0.001 |
| Central Asia                 | 14.23 (13.61, 14.87) | 14.23 (13.70, 14.78) | 0.00 (-0.00, 0.00)    | 1.000  | 1.52 (1.30, 1.76)       | 1.33 (1.17, 1.50)       | -0.50 (-0.78, -0.21) | 0.001  | 143.99 (141.96, 146.04) | 293.01 (290.61, 295.42)    | 2.31 (1.25, 3.37)    | <0.001 | 2.48 (2.22, 2.77) | 5.16 (4.84, 5.48)    | 2.40 (1.42, 3.39)    | <0.001 |
| Eastern Europe               | 17.37 (16.98, 17.77) | 17.38 (16.93, 17.83) | 0.00 (-0.01, 0.00)    | 0.703  | 2.96 (2.81, 3.11)       | 2.64 (2.50, 2.80)       | -0.39 (-0.74, -0.04) | 0.026  | 488.37 (486.37, 490.37) | 1113.97 (1110.72, 1117.22) | 2.92 (1.96, 3.88)    | <0.001 | 8.63 (8.37, 8.90) | 19.90 (19.47, 20.33) | 2.96 (2.01, 3.91)    | <0.001 |

|                                                |  |               |         |         |        |               |             |         |        |               |               |          |         |        |             |             |
|------------------------------------------------|--|---------------|---------|---------|--------|---------------|-------------|---------|--------|---------------|---------------|----------|---------|--------|-------------|-------------|
|                                                |  | 17.84)        | 0.01)   |         |        |               |             |         | -0.05) |               | 490.39)       | 1117.22) | 3.89)   |        | 20.34)      | 3.92)       |
| Southern                                       |  | 12.54 (11.86, | 12.53   | -0.00   |        |               |             |         |        |               | 105.48        |          | -0.48   |        |             | -0.59       |
| Sub-Saharan                                    |  | 13.26)        | (12.00, | (-0.01, | 0.309  | —             | —           | —       | —      | (103.43,      | 93.46 (92.01, |          | (-1.09, | 0.119  | 1.80 (1.54, | 1.56 (1.38, |
| Africa                                         |  |               | 13.08)  | 0.00)   |        |               |             |         |        | 107.56)       | 94.93)        |          | 0.13)   |        | 2.09)       | 1.76)       |
| High-income Asia                               |  | 21.87 (21.38, | 21.68   | -0.03   |        | 23.39 (22.88, | 18.92       | -0.73   |        | 82.56 (81.60, | 44.70 (43.92, |          | -2.10   |        | 1.30 (1.18, | 0.68 (0.58, |
| Pacific                                        |  | 22.37)        | (21.11, | (-0.05, | 0.001  | 23.90)        | (18.41,     | (-0.86, | <0.001 | 83.52)        | 45.50)        |          | (-2.39, | <0.001 | 1.42)       | 0.78)       |
|                                                |  |               | 22.25)  | -0.01)  |        |               | 19.45)      | -0.59)  |        |               |               |          | -1.81)  |        |             | -1.93)      |
| Central Europe                                 |  | 19.48 (18.92, | 19.72   | 0.04    |        | 0.19 (0.14,   | 0.36 (0.28, | 2.65    |        | 128.37        | 109.61        |          | -0.55   |        | 2.22 (2.03, | 1.89 (1.71, |
|                                                |  | 20.06)        | (19.08, | (0.03,  | <0.001 | 0.25)         | 0.44)       | (1.09,  | 0.001  | (126.95,      | (108.16,      |          | (-0.69, | <0.001 | 2.41)       | 2.09)       |
|                                                |  |               | 20.39)  | 0.06)   |        |               |             | 4.23)   |        | 129.79)       | 111.07)       |          | -0.40)  |        |             | -0.40)      |
| Andean Latin                                   |  | 10.66 (9.92,  | 10.67   | 0.00    |        |               |             |         |        | 32.02 (30.73, | 29.43 (28.50, |          | -0.27   |        | 0.52 (0.37, | 0.48 (0.37, |
| America                                        |  | 11.45)        | (10.11, | (0.00,  | <0.001 | —             | —           | —       | —      | 33.35)        | 30.39)        |          | (-0.43, | 0.001  | 0.72)       | 0.61)       |
|                                                |  |               | 11.25)  | 0.00)*  |        |               |             |         |        |               |               |          | -0.11)  |        |             | -0.12)      |
| Caribbean                                      |  | 10.79 (10.04, | 10.79   | 0.00    |        |               |             |         |        | 81.49 (79.34, | 89.70 (87.74, |          | 0.38    |        | 1.38 (1.11, | 1.53 (1.29, |
|                                                |  | 11.60)        | (10.13, | (0.00,  | <0.001 | —             | —           | —       | —      | 83.69)        | 91.68)        |          | (0.20,  | <0.001 | 1.70)       | 1.81)       |
|                                                |  |               | 11.50)  | 0.00)*  |        |               |             |         |        |               |               |          | 0.55)   |        |             | 0.56)       |
| Southern Latin                                 |  | 14.47 (13.71, | 14.47   | -0.00   |        | 5.47 (5.01,   | 2.05 (1.82, | -3.36   |        | 97.86 (95.85, | 78.33 (76.81, |          | -0.74   |        | 1.63 (1.38, | 1.30 (1.11, |
| America                                        |  | 15.26)        | (13.81, | (-0.01, | 0.758  | 5.97)         | 2.32)       | (-4.48, | <0.001 | 99.89)        | 79.88)        |          | (-0.99, | <0.001 | 1.92)       | 1.51)       |
|                                                |  |               | 15.14)  | 0.00)   |        |               |             | -2.21)  |        |               |               |          | -0.49)  |        |             | -0.47)      |
| Oceania                                        |  | 13.64 (11.71, | 13.64   | 0.00    |        |               |             |         |        | 63.43 (59.06, | 75.40 (72.13, |          | 0.56    |        | 1.07 (0.57, | 1.27 (0.88, |
|                                                |  | 15.82)        | (12.29, | (0.00,  | <0.001 | —             | —           | —       | —      | 68.04)        | 78.79)        |          | (0.44,  | <0.001 | 1.86)       | 1.79)       |
|                                                |  |               | 15.10)  | 0.00)*  |        |               |             |         |        |               |               |          | 0.69)   |        |             | 0.69)       |
| Australasia                                    |  | 17.15 (15.91, | 17.34   | 0.04    |        | 0.32 (0.17,   | 0.18 (0.09, | -2.27   |        | 121.40        | 73.80 (71.45, |          | -1.68   |        | 1.97 (1.57, | 1.22 (0.93, |
|                                                |  | 18.47)        | (16.20, | (0.03,  | <0.001 | 0.55)         | 0.34)       | (-3.53, | 0.001  | (118.06,      | 76.22)        |          | (-2.25, | <0.001 | 2.45)       | 1.57)       |
|                                                |  |               | 18.56)  | 0.05)   |        |               |             | -0.99)  |        | 124.82)       |               |          | -1.11)  |        |             | -1.04)      |
| <b>Atrial fibrillation and flutter Overall</b> |  |               |         |         |        |               |             |         |        |               |               |          |         |        |             |             |
| Global                                         |  | 2.48 (2.46,   | 2.36    | -0.17   |        | 8.24 (8.20,   | 7.85 (7.82, | -0.17   |        | 1.07 (1.05,   | 1.08 (1.07,   |          | 0.03    |        | 0.01 (0.01, | 0.01 (0.01, |
|                                                |  | 2.50)         | (2.35,  | (-0.21, | <0.001 | 8.28)         | 7.88)       | (-0.20, | <0.001 | 1.08)         | 1.09)         |          | (0.03,  | <0.001 | 0.01)       | 0.01)       |
|                                                |  |               | 2.38)   | -0.13)  |        |               |             | -0.14)  |        |               |               |          | 0.03)   |        |             | —           |
| <b>SDI category</b>                            |  |               |         |         |        |               |             |         |        |               |               |          |         |        |             |             |

|                              | 2019        | 2020   | 2021    | 2022   | 2019          | 2020        | 2021    | 2022   | 2019        | 2020        | 2021    | 2022   | 2019        | 2020        | 2021   | 2022   |
|------------------------------|-------------|--------|---------|--------|---------------|-------------|---------|--------|-------------|-------------|---------|--------|-------------|-------------|--------|--------|
| High                         | 3.75 (3.69, | 3.87   | 0.11    |        | 12.43 (12.32, | 12.82       | 0.11    |        | 1.47 (1.43, | 1.47 (1.44, | 0.00    |        | 0.01 (0.00, | 0.01 (0.00, | —      | —      |
|                              | 3.81)       | (3.81, | (0.08,  | <0.001 | 12.55)        | (12.71,     | (0.08,  | <0.001 | 1.51)       | 1.51)       | (-0.09, | 0.936  | 0.01)       | 0.01)       |        |        |
| High-middle                  | 2.63 (2.59, | 2.57   | -0.08   |        | 8.74 (8.66,   | 8.53 (8.46, | -0.09   |        | 1.09 (1.06, | 1.06 (1.04, | -0.10   |        | 0.01 (0.00, | 0.01 (0.00, | 0.00   | 0.00   |
|                              | 2.68)       | (2.53, | (-0.11, | <0.001 | 8.82)         | 8.60)       | (-0.10, | <0.001 | 1.12)       | 1.09)       | (-0.17, | 0.007  | 0.01)       | 0.01)       | (0.00, | 1.000  |
| Middle                       | 2.14 (2.10, | 2.15   | 0.01    |        | 7.10 (7.03,   | 7.12 (7.07, | 0.01    |        | 1.01 (0.98, | 1.08 (1.06, | 0.22    |        | 0.01 (0.01, | 0.01 (0.01, | —      | —      |
|                              | 2.17)       | (2.12, | (-0.03, | 0.740  | 7.16)         | 7.17)       | (-0.02, | 0.731  | 1.03)       | 1.11)       | (0.15,  | <0.001 | 0.01)       | 0.01)       |        |        |
| Low-middle                   | 2.04 (1.99, | 2.02   | -0.03   |        | 6.78 (6.69,   | 6.69 (6.63, | -0.04   |        | 0.86 (0.83, | 0.95 (0.93, | 0.36    |        | 0.01 (0.00, | 0.01 (0.01, | —      | —      |
|                              | 2.09)       | (1.98, | (-0.07, | 0.147  | 6.86)         | 6.76)       | (-0.06, | <0.001 | 0.89)       | 0.97)       | (0.32,  | <0.001 | 0.01)       | 0.01)       |        |        |
| Low                          | 1.60 (1.53, | 1.58   | -0.03   |        | 5.30 (5.19,   | 5.25 (5.18, | -0.03   |        | 0.83 (0.79, | 0.88 (0.85, | 0.19    |        | 0.01 (0.00, | 0.01 (0.01, | —      | —      |
|                              | 1.66)       | (1.54, | (-0.10, | 0.450  | 5.42)         | 5.33)       | (-0.05, | 0.010  | 0.88)       | 0.91)       | (0.14,  | <0.001 | 0.01)       | 0.01)       |        |        |
| <b>21 GBD region</b>         |             |        |         |        |               |             |         |        |             |             |         |        |             |             |        |        |
| South Asia                   | 2.19 (2.14, | 2.21   | 0.03    |        | 7.26 (7.17,   | 7.34 (7.27, | 0.03    |        | 0.83 (0.80, | 0.93 (0.91, | 0.42    |        | —           | 0.01 (0.00, | —      | —      |
|                              | 2.24)       | (2.18, | (-0.01, | 0.114  | 7.34)         | 7.40)       | (-0.01, | 0.124  | 0.86)       | 0.95)       | (0.31,  | <0.001 |             | 0.01)       |        |        |
| East Asia                    | 2.38 (2.34, | 2.51   | 0.18    |        | 7.90 (7.82,   | 8.33 (8.25, | 0.17    |        | 0.91 (0.89, | 0.93 (0.91, | 0.05    |        | —           | —           | —      | —      |
|                              | 2.42)       | (2.47, | (0.13,  | <0.001 | 7.97)         | 8.40)       | (0.14,  | <0.001 | 0.94)       | 0.96)       | (-0.04, | 0.299  |             |             |        |        |
| North Africa and Middle East | 1.74 (1.66, | 1.78   | 0.07    |        | 5.78 (5.64,   | 5.91 (5.82, | 0.07    |        | 0.88 (0.82, | 0.94 (0.90, | 0.20    |        | 0.01 (0.00, | 0.01 (0.00, | 0.00   | 0.00   |
|                              | 1.82)       | (1.73, | (0.02,  | 0.013  | 5.93)         | 6.00)       | (0.04,  | <0.001 | 0.94)       | 0.97)       | (0.17,  | <0.001 | 0.01)       | 0.01)       | (0.00, | 1.000  |
| Western Sub-Saharan Africa   | 1.52 (1.42, | 1.55   | 0.07    |        | 5.05 (4.87,   | 5.14 (5.03, | 0.06    |        | 0.61 (0.55, | 0.65 (0.60, | 0.23    |        | —           | —           | —      | —      |
|                              | 1.63)       | (1.49, | (0.01,  | 0.033  | 5.25)         | 5.27)       | (0.03,  | <0.001 | 0.68)       | 0.69)       | (0.17,  | <0.001 |             |             |        |        |
| Southeast Asia               | 2.43 (2.35, | 2.52   | 0.12    |        | 8.06 (7.92,   | 8.36 (8.25, | 0.12    |        | 1.16 (1.10, | 1.43 (1.39, | 0.73    |        | 0.01 (0.00, | 0.01 (0.01, | —      | —      |
|                              | 2.51)       | (2.46, | (0.07,  | <0.001 | 8.20)         | 8.46)       | (0.09,  | <0.001 | 1.21)       | 1.48)       | (0.67,  | <0.001 | 0.01)       | 0.02)       |        |        |
| Eastern Sub-Saharan          | 0.96 (0.88, | 0.99   | 0.12    |        | 3.19 (3.04,   | 3.27 (3.17, | 0.09    |        | 0.87 (0.80, | 0.87 (0.82, | -0.02   |        | 0.01 (0.00, | 0.01 (0.01, | 0.00   | 0.00   |
|                              | 1.05)       | (0.93, | (0.01,  | 0.035  | 3.35)         | 3.37)       | (0.03,  | 0.001  | 0.96)       | 0.92)       | (-0.17, | 0.824  | 0.02)       | 0.02)       | (0.00, | <0.001 |
| 56                           |             |        |         |        |               |             |         |        |             |             |         |        |             |             |        |        |



|                             |                   |                   |                      |        |                      |                      |                      |        |                   |                   |                      |        |                   |                   |                      |
|-----------------------------|-------------------|-------------------|----------------------|--------|----------------------|----------------------|----------------------|--------|-------------------|-------------------|----------------------|--------|-------------------|-------------------|----------------------|
| Africa                      |                   | 1.04)             | 0.23)                |        |                      |                      | 0.14)                |        |                   |                   | 0.14)                |        |                   |                   | 0.00)*               |
| Central Latin America       | 1.03 (0.95, 1.12) | 1.03 (0.97, 1.10) | -0.00 (-0.06, 0.06)  | 0.936  | 3.43 (3.27, 3.59)    | 3.43 (3.32, 3.55)    | 0.00 (-0.02, 0.03)   | 0.699  | 0.85 (0.78, 0.93) | 0.81 (0.76, 0.87) | -0.15 (-0.31, 0.01)  | 0.072  | 0.01 (0.00, 0.02) | 0.01 (0.00, 0.02) | 0.00 (0.00, 0.00)*   |
| Tropical Latin America      | 1.50 (1.40, 1.61) | 1.51 (1.43, 1.59) | 0.11 (0.04, 0.19)    | 0.005  | 4.98 (4.80, 5.17)    | 5.01 (4.87, 5.15)    | 0.12 (0.06, 0.18)    | <0.001 | 1.26 (1.17, 1.36) | 1.30 (1.23, 1.37) | 0.15 (-0.15, 0.44)   | 0.334  | 0.02 (0.01, 0.03) | 0.02 (0.01, 0.03) | -0.25 (-3.55, 3.15)  |
| Central Sub-Saharan Africa  | 1.41 (1.23, 1.61) | 1.42 (1.30, 1.54) | 0.02 (-0.01, 0.04)   | 0.255  | 4.68 (4.35, 5.03)    | 4.70 (4.48, 4.91)    | 0.02 (0.00, 0.03)    | 0.016  | 0.88 (0.74, 1.04) | 0.89 (0.80, 0.99) | 0.06 (-0.00, 0.11)   | 0.053  | 0.01 (0.00, 0.04) | 0.01 (0.00, 0.02) | 0.00 (0.00, 0.00)*   |
| Western Europe              | 3.63 (3.53, 3.73) | 3.32 (3.23, 3.41) | -0.29 (-0.33, -0.26) | <0.001 | 12.05 (11.87, 12.22) | 11.00 (10.84, 11.17) | -0.31 (-0.34, -0.28) | <0.001 | 1.62 (1.56, 1.69) | 1.40 (1.34, 1.46) | -0.50 (-0.56, -0.44) | <0.001 | 0.01 (0.01, 0.02) | 0.01 (0.00, 0.02) | 0.00 (0.00, 0.00)*   |
| High-income North America   | 4.56 (4.44, 4.68) | 5.56 (5.43, 5.69) | 0.68 (0.62, 0.75)    | <0.001 | 15.14 (14.92, 15.35) | 18.44 (18.21, 18.67) | 0.68 (0.61, 0.74)    | <0.001 | 1.57 (1.50, 1.64) | 1.92 (1.84, 1.99) | 0.70 (0.55, 0.85)    | <0.001 | 0.01 (0.00, 0.01) | 0.01 (0.00, 0.01) | 0.00 (0.00, 0.00)    |
| Central Asia                | 2.64 (2.44, 2.85) | 2.77 (2.60, 2.94) | 0.16 (0.13, 0.20)    | <0.001 | 8.77 (8.40, 9.15)    | 9.18 (8.88, 9.49)    | 0.16 (0.13, 0.18)    | <0.001 | 1.10 (0.97, 1.24) | 1.19 (1.08, 1.30) | 0.27 (0.13, 0.42)    | <0.001 | 0.01 (0.00, 0.03) | 0.01 (0.00, 0.02) | 0.00 (0.00, 0.00)*   |
| Eastern Europe              | 3.28 (3.17, 3.39) | 3.50 (3.38, 3.62) | 0.22 (0.19, 0.26)    | <0.001 | 10.87 (10.67, 11.08) | 11.60 (11.39, 11.83) | 0.23 (0.20, 0.25)    | <0.001 | 1.13 (1.06, 1.19) | 1.25 (1.18, 1.33) | 0.37 (0.27, 0.47)    | <0.001 | —                 | —                 | —                    |
| Southern Sub-Saharan Africa | 1.60 (1.41, 1.80) | 1.59 (1.45, 1.73) | -0.01 (-0.07, 0.05)  | 0.640  | 5.29 (4.95, 5.65)    | 5.26 (5.02, 5.52)    | -0.02 (-0.04, 0.01)  | 0.262  | 2.24 (2.03, 2.48) | 1.52 (1.39, 1.66) | -1.48 (-2.20, -0.75) | <0.001 | 0.03 (0.01, 0.07) | 0.02 (0.01, 0.04) | -1.79 (-3.03, -0.53) |
| High-income Asia Pacific    | 2.88 (2.75, 3.01) | 2.87 (2.74, 3.00) | -0.03 (-0.09, 0.03)  | 0.367  | 9.53 (9.31, 9.76)    | 9.51 (9.28, 9.75)    | -0.02 (-0.08, 0.04)  | 0.422  | 1.23 (1.15, 1.32) | 1.15 (1.07, 1.23) | -0.23 (-0.35, -0.11) | <0.001 | 0.01 (0.00, 0.02) | 0.01 (0.00, 0.02) | 0.00 (0.00, 0.00)*   |
| Central Europe              | 3.12 (2.97, 3.28) | 3.10 (2.95, 3.27) | -0.03 (-0.08, 0.03)  | 0.368  | 10.37 (10.09, 10.64) | 10.31 (10.02, 10.60) | -0.02 (-0.04, 0.01)  | 0.293  | 1.30 (1.21, 1.40) | 1.26 (1.16, 1.37) | -0.12 (-0.22, -0.01) | 0.031  | 0.01 (0.00, 0.02) | 0.01 (0.00, 0.02) | 0.00 (0.00, 0.00)*   |
| Andean Latin America        | 0.33 (0.24, 0.45) | 0.38 (0.31, 0.45) | 0.52 (0.28, 0.76)    | <0.001 | 1.09 (0.91, 1.29)    | 1.26 (1.12, 1.40)    | 0.51 (0.33, 0.69)    | <0.001 | 1.03 (0.86, 1.22) | 0.96 (0.84, 1.09) | -0.28 (-0.54, -0.02) | 0.044  | 0.02 (0.00, 0.06) | 0.02 (0.00, 0.04) | 0.00 (0.00, 0.00)*   |

|                        |                   |              |                |        |                      |                   |                |        |                   |                   |               |        |                   |                   |               |        |
|------------------------|-------------------|--------------|----------------|--------|----------------------|-------------------|----------------|--------|-------------------|-------------------|---------------|--------|-------------------|-------------------|---------------|--------|
|                        |                   | 0.46)        | 0.76)          |        |                      |                   | 0.70)          |        |                   |                   | -0.01)        |        |                   |                   | 0.00)*        |        |
| Caribbean              | 0.95 (0.79, 1.14) | 0.98         | 0.11           | <0.001 | 3.16 (2.85, 3.49)    | 3.24 (2.98, 3.51) | 0.09           | <0.001 | 0.97 (0.80, 1.16) | 1.02 (0.87, 1.17) | 0.17          | 0.152  | 0.01 (0.00, 0.05) | 0.01 (0.00, 0.04) | 0.00          | <0.001 |
|                        |                   | 1.13)        | 0.16)          |        |                      |                   | 0.13)          |        |                   |                   | 0.39)         |        |                   |                   | 0.00)*        |        |
| Southern Latin America | 1.96 (1.76, 2.17) | 2.03         | 0.11           | 0.001  | 6.49 (6.13, 6.88)    | 6.72 (6.41, 7.04) | 0.11           | <0.001 | 1.08 (0.94, 1.25) | 1.05 (0.93, 1.18) | -0.13         | 0.088  | 0.01 (0.00, 0.04) | 0.01 (0.00, 0.03) | 0.00          | <0.001 |
|                        |                   | (1.86, 2.21) | (0.05, 0.17)   |        |                      |                   | (0.08, 0.15)   |        |                   |                   | (-0.27, 0.02) |        |                   |                   | (0.00, 0.00)* |        |
| Oceania                | 2.34 (1.73, 3.10) | 2.37         | 0.04           | 0.309  | 7.76 (6.60, 9.07)    | 7.87 (7.10, 8.70) | 0.04           | 0.283  | 4.64 (3.77, 5.66) | 5.56 (4.92, 6.27) | 0.61          | <0.001 | 0.07 (0.01, 0.32) | 0.09 (0.03, 0.23) | 0.75          | <0.001 |
|                        |                   | (1.96, 2.85) | (-0.03, 0.10)  |        |                      |                   | (-0.03, 0.11)  |        |                   |                   | (0.49, 0.73)  |        |                   |                   | (0.75, 0.75)  |        |
| Australasia            | 4.73 (4.28, 5.21) | 4.49         | -0.17          | <0.001 | 15.69 (14.87, 16.55) | 14.92             | -0.17          | <0.001 | 1.63 (1.37, 1.92) | 1.55 (1.33, 1.81) | -0.16         | 0.195  | 0.01 (0.00, 0.06) | 0.01 (0.00, 0.06) | 0.00          | <0.001 |
|                        |                   | (4.11, 4.91) | (-0.21, -0.13) |        |                      |                   | (-0.20, -0.13) |        |                   |                   | (-0.39, 0.08) |        |                   |                   | (0.00, 0.00)* |        |
| <b>Women</b>           |                   |              |                |        |                      |                   |                |        |                   |                   |               |        |                   |                   |               |        |
| Global                 | 1.80 (1.78, 1.83) | 1.83         | 0.05           | 0.359  | 5.99 (5.94, 6.04)    | 6.06 (6.02, 6.10) | 0.03           | 0.337  | 0.83 (0.81, 0.84) | 0.87 (0.85, 0.88) | 0.15          | 0.003  | 0.01 (0.00, 0.01) | 0.01 (0.01, 0.01) | —             | —      |
|                        |                   | 1.85)        | 0.16)          |        |                      |                   | 0.10)          |        |                   |                   | 0.25)         |        |                   |                   |               |        |
| <b>SDI category</b>    |                   |              |                |        |                      |                   |                |        |                   |                   |               |        |                   |                   |               |        |
| High                   | 1.66 (1.60, 1.72) | 1.86         | 0.39           | <0.001 | 5.50 (5.39, 5.61)    | 6.16 (6.05, 6.27) | 0.39           | <0.001 | 0.77 (0.73, 0.81) | 0.80 (0.76, 0.84) | 0.13          | 0.001  | 0.01 (0.00, 0.01) | 0.01 (0.00, 0.01) | 0.00          | 1.000  |
|                        |                   | (1.80, 1.92) | (0.30, 0.49)   |        |                      |                   | (0.36, 0.42)   |        |                   |                   | (0.05, 0.21)  |        |                   |                   | (0.00, 0.00)  |        |
| High-middle            | 1.81 (1.76, 1.87) | 1.90         | 0.17           | <0.001 | 6.02 (5.92, 6.12)    | 6.27 (6.18, 6.36) | 0.14           | <0.001 | 0.81 (0.77, 0.84) | 0.82 (0.79, 0.86) | 0.04          | 0.392  | 0.01 (0.00, 0.01) | 0.01 (0.00, 0.01) | 0.00          | 1.000  |
|                        |                   | (1.85, 1.95) | (0.08, 0.26)   |        |                      |                   | (0.11, 0.17)   |        |                   |                   | (-0.05, 0.14) |        |                   |                   | (0.00, 0.00)  |        |
| Middle                 | 1.95 (1.90, 2.00) | 1.94         | -0.04          | 0.447  | 6.48 (6.39, 6.57)    | 6.42 (6.34, 6.49) | -0.07          | 0.247  | 0.92 (0.89, 0.96) | 0.96 (0.93, 0.99) | 0.09          | 0.216  | 0.01 (0.00, 0.01) | 0.01 (0.01, 0.01) | —             | —      |
|                        |                   | (1.90, 1.98) | (-0.15, 0.07)  |        |                      |                   | (-0.18, 0.05)  |        |                   |                   | (-0.05, 0.24) |        |                   |                   |               |        |
| Low-middle             | 1.85 (1.79, 1.92) | 1.84         | -0.04          | 0.199  | 6.16 (6.04, 6.27)    | 6.09 (6.01, 6.18) | -0.05          | 0.181  | 0.76 (0.72, 0.80) | 0.83 (0.80, 0.86) | 0.30          | <0.001 | —                 | 0.01 (0.00, 0.01) | —             | —      |
|                        |                   | (1.79, 1.88) | (-0.10, 0.02)  |        |                      |                   | (-0.13, 0.03)  |        |                   |                   | (0.21, 0.39)  |        |                   |                   |               |        |
| Low                    | 1.40 (1.32, 1.49) | 1.38         | -0.05          | 0.082  | 4.66 (4.51, 4.82)    | 4.59 (4.50, 4.69) | -0.05          | 0.002  | 0.77 (0.71, 0.83) | 0.81 (0.76, 0.85) | 0.17          | <0.001 | 0.01 (0.00, 0.02) | 0.01 (0.00, 0.01) | 0.00          | <0.001 |
|                        |                   | (1.33, 1.44) | (-0.10, 0.01)  |        |                      |                   | (-0.08, -0.02) |        |                   |                   | (0.13, 0.21)  |        |                   |                   | (0.00, 0.00)* |        |

| 21 GBD region                |                   |                   |                      |        |                   |                      |                      |        |                   |                   |                      |        |                   |                   |                    |        |
|------------------------------|-------------------|-------------------|----------------------|--------|-------------------|----------------------|----------------------|--------|-------------------|-------------------|----------------------|--------|-------------------|-------------------|--------------------|--------|
| South Asia                   | 2.04 (1.98, 2.11) | 2.10 (2.06, 2.15) | 0.10 (0.02, 0.19)    | 0.015  | 6.78 (6.66, 6.90) | 6.98 (6.90, 7.07)    | 0.11 (0.01, 0.20)    | 0.024  | 0.74 (0.70, 0.78) | 0.82 (0.79, 0.85) | 0.32 (0.04, 0.60)    | 0.025  | —                 | —                 | —                  | —      |
| East Asia                    | 2.30 (2.24, 2.36) | 2.44 (2.38, 2.50) | 0.18 (0.09, 0.27)    | <0.001 | 7.64 (7.53, 7.75) | 8.09 (7.99, 8.20)    | 0.18 (0.13, 0.23)    | <0.001 | 0.87 (0.84, 0.91) | 0.89 (0.86, 0.93) | 0.09 (-0.05, 0.23)   | 0.209  | —                 | —                 | —                  | —      |
| North Africa and Middle East | 1.28 (1.18, 1.38) | 1.29 (1.23, 1.36) | 0.02 (-0.04, 0.08)   | 0.526  | 4.25 (4.07, 4.43) | 4.29 (4.18, 4.41)    | 0.02 (-0.02, 0.06)   | 0.265  | 0.73 (0.66, 0.81) | 0.81 (0.77, 0.86) | 0.36 (0.28, 0.44)    | <0.001 | 0.01 (0.00, 0.02) | 0.01 (0.00, 0.01) | 0.00 (0.00, 0.00)* | <0.001 |
| Western Sub-Saharan Africa   | 1.32 (1.18, 1.46) | 1.34 (1.25, 1.42) | 0.06 (0.00, 0.12)    | 0.047  | 4.37 (4.12, 4.63) | 4.44 (4.28, 4.59)    | 0.06 (0.03, 0.08)    | <0.001 | 0.54 (0.46, 0.64) | 0.57 (0.52, 0.63) | 0.16 (0.09, 0.22)    | <0.001 | —                 | —                 | —                  | —      |
| Southeast Asia               | 2.23 (2.12, 2.33) | 2.30 (2.22, 2.38) | 0.10 (0.05, 0.16)    | <0.001 | 7.38 (7.20, 7.57) | 7.62 (7.47, 7.76)    | 0.10 (0.07, 0.13)    | <0.001 | 0.93 (0.87, 1.00) | 1.14 (1.09, 1.20) | 0.69 (0.60, 0.78)    | <0.001 | 0.01 (0.00, 0.01) | 0.01 (0.00, 0.02) | 0.00 (0.00, 0.00)* | <0.001 |
| Eastern Sub-Saharan Africa   | 0.80 (0.70, 0.92) | 0.81 (0.74, 0.88) | 0.05 (-0.01, 0.10)   | 0.124  | 2.66 (2.47, 2.86) | 2.68 (2.55, 2.80)    | 0.03 (-0.02, 0.08)   | 0.197  | 0.85 (0.74, 0.97) | 0.81 (0.75, 0.88) | -0.17 (-0.38, 0.05)  | 0.126  | 0.01 (0.00, 0.03) | 0.01 (0.00, 0.02) | 0.00 (0.00, 0.00)* | <0.001 |
| Central Latin America        | 0.83 (0.73, 0.95) | 0.82 (0.74, 0.90) | -0.05 (-0.12, 0.02)  | 0.164  | 2.76 (2.56, 2.96) | 2.71 (2.57, 2.86)    | -0.07 (-0.12, -0.02) | 0.011  | 0.84 (0.74, 0.96) | 0.77 (0.69, 0.85) | -0.26 (-0.40, -0.13) | <0.001 | 0.01 (0.00, 0.03) | 0.01 (0.00, 0.02) | 0.00 (0.00, 0.00)* | <0.001 |
| Tropical Latin America       | 1.13 (1.01, 1.26) | 1.14 (1.05, 1.24) | 0.13 (-0.02, 0.27)   | 0.093  | 3.73 (3.51, 3.97) | 3.77 (3.61, 3.95)    | 0.12 (0.02, 0.22)    | 0.019  | 1.08 (0.97, 1.21) | 1.17 (1.08, 1.27) | 0.32 (0.06, 0.58)    | 0.017  | 0.01 (0.00, 0.04) | 0.02 (0.01, 0.03) | 2.37 (-1.88, 6.79) | 0.279  |
| Central Sub-Saharan Africa   | 1.22 (0.99, 1.49) | 1.20 (1.06, 1.36) | -0.06 (-0.11, -0.02) | 0.008  | 4.06 (3.63, 4.53) | 3.99 (3.71, 4.27)    | -0.05 (-0.07, -0.03) | <0.001 | 0.81 (0.63, 1.03) | 0.81 (0.70, 0.95) | -0.02 (-0.07, 0.03)  | 0.435  | 0.01 (0.00, 0.06) | 0.01 (0.00, 0.03) | 0.00 (-0.00, 0.00) | 1.000  |
| Western Europe               | 1.13 (1.06, 1.21) | 1.01 (0.94, 1.08) | -0.39 (-0.56, -0.23) | <0.001 | 3.76 (3.62, 3.90) | 3.35 (3.22, 3.48)    | -0.39 (-0.44, -0.35) | <0.001 | 0.73 (0.67, 0.79) | 0.63 (0.57, 0.69) | -0.49 (-0.63, -0.35) | <0.001 | 0.01 (0.00, 0.02) | 0.01 (0.00, 0.02) | 0.00 (0.00, 0.00)* | <0.001 |
| High-income North America    | 2.43 (2.31, 2.56) | 3.11 (2.97, 3.25) | 0.87 (0.77, 0.97)    | <0.001 | 8.07 (7.85, 8.29) | 10.31 (10.07, 10.55) | 0.85 (0.80, 0.90)    | <0.001 | 0.90 (0.82, 0.97) | 1.11 (1.03, 1.20) | 0.78 (0.61, 0.95)    | <0.001 | —                 | —                 | —                  | —      |

|                             |                   |              |                |        |                      |                   |                |        |                   |                   |                |        |                   |                   |               |        |
|-----------------------------|-------------------|--------------|----------------|--------|----------------------|-------------------|----------------|--------|-------------------|-------------------|----------------|--------|-------------------|-------------------|---------------|--------|
|                             |                   | 3.24)        | 0.96)          |        |                      | 10.56)            | 0.91)          |        |                   |                   | 0.94)          |        |                   |                   |               |        |
| Central Asia                | 1.43 (1.23, 1.66) | 1.46         | 0.08           | 0.004  | 4.75 (4.37, 5.16)    | 4.86 (4.55, 5.19) | 0.08           | <0.001 | 0.71 (0.57, 0.88) | 0.75 (0.63, 0.88) | 0.20           | <0.001 | 0.01 (0.00, 0.04) | 0.01 (0.00, 0.03) | 0.00          | <0.001 |
|                             |                   | 1.65)        | 0.13)          |        |                      |                   | 0.11)          |        |                   |                   | 0.29)          |        |                   |                   | 0.00)*        |        |
| Eastern Europe              | 1.81 (1.69, 1.93) | 1.95         | 0.27           | <0.001 | 6.00 (5.78, 6.22)    | 6.48 (6.25, 6.72) | 0.27           | <0.001 | 0.69 (0.62, 0.77) | 0.77 (0.69, 0.86) | 0.40           | <0.001 | —                 | —                 | —             | —      |
|                             |                   | 2.09)        | 0.36)          |        |                      |                   | 0.31)          |        |                   |                   | 0.59)          |        |                   |                   |               |        |
| Southern Sub-Saharan Africa | 1.37 (1.14, 1.64) | 1.33         | -0.11          | 0.042  | 4.55 (4.11, 5.02)    | 4.42 (4.10, 4.75) | -0.09          | 0.002  | 2.51 (2.20, 2.86) | 1.37 (1.20, 1.56) | -1.95          | <0.001 | 0.04 (0.01, 0.11) | 0.02 (0.00, 0.05) | -2.42         | 0.133  |
|                             |                   | (1.16, 1.52) | (-0.21, -0.00) |        |                      |                   | (-0.14, -0.03) |        |                   |                   | (-3.00, -0.90) |        |                   |                   | (-5.49, 0.75) |        |
| High-income Asia Pacific    | 0.90 (0.80, 1.01) | 0.71         | -0.86          | <0.001 | 2.99 (2.82, 3.18)    | 2.35 (2.19, 2.52) | -0.85          | <0.001 | 0.60 (0.52, 0.68) | 0.47 (0.40, 0.55) | -0.85          | <0.001 | 0.01 (0.00, 0.02) | —                 | —             | —      |
|                             |                   | (0.62, 0.81) | (-1.00, -0.72) |        |                      |                   | (-0.92, -0.78) |        |                   |                   | (-1.06, -0.65) |        |                   |                   |               |        |
| Central Europe              | 1.30 (1.17, 1.45) | 1.28         | -0.05          | 0.166  | 4.32 (4.07, 4.58)    | 4.26 (4.00, 4.54) | -0.05          | 0.003  | 0.71 (0.61, 0.82) | 0.67 (0.57, 0.79) | -0.20          | 0.002  | 0.01 (0.00, 0.03) | 0.01 (0.00, 0.04) | 0.00          | <0.001 |
|                             |                   | (1.14, 1.44) | (-0.13, 0.02)  |        |                      |                   | (-0.09, -0.02) |        |                   |                   | (-0.33, -0.07) |        |                   |                   | (0.00, 0.00)* |        |
| Andean Latin America        | 0.25 (0.14, 0.41) | 0.29         | 0.60           | <0.001 | 0.82 (0.61, 1.08)    | 0.96 (0.80, 1.15) | 0.54           | <0.001 | 0.95 (0.72, 1.22) | 0.85 (0.70, 1.03) | -0.43          | 0.104  | 0.02 (0.00, 0.09) | 0.01 (0.00, 0.06) | -2.40         | 0.404  |
|                             |                   | (0.20, 0.40) | (0.41, 0.80)   |        |                      |                   | (0.41, 0.66)   |        |                   |                   | (-0.94, 0.09)  |        |                   |                   | (-7.81, 3.33) |        |
| Caribbean                   | 0.71 (0.52, 0.95) | 0.72         | 0.03           | 0.292  | 2.36 (2.00, 2.78)    | 2.38 (2.07, 2.72) | 0.03           | 0.035  | 0.76 (0.56, 1.01) | 0.77 (0.60, 0.97) | 0.02           | 0.842  | 0.01 (0.00, 0.08) | 0.01 (0.00, 0.06) | 0.00          | <0.001 |
|                             |                   | (0.55, 0.91) | (-0.02, 0.08)  |        |                      |                   | (0.00, 0.05)   |        |                   |                   | (-0.20, 0.24)  |        |                   |                   | (0.00, 0.00)* |        |
| Southern Latin America      | 1.01 (0.82, 1.24) | 1.05         | 0.11           | 0.035  | 3.36 (3.00, 3.76)    | 3.48 (3.18, 3.81) | 0.11           | <0.001 | 0.75 (0.59, 0.95) | 0.69 (0.56, 0.85) | -0.34          | <0.001 | 0.01 (0.00, 0.06) | 0.01 (0.00, 0.04) | 0.00          | 0.004  |
|                             |                   | (0.88, 1.24) | (0.01, 0.21)   |        |                      |                   | (0.07, 0.14)   |        |                   |                   | (-0.46, -0.22) |        |                   |                   | (0.00, 0.00)* |        |
| Oceania                     | 2.11 (1.32, 3.22) | 2.16         | 0.06           | 0.129  | 7.01 (5.47, 8.86)    | 7.18 (6.15, 8.33) | 0.07           | 0.011  | 5.85 (4.45, 7.55) | 7.03 (6.01, 8.16) | 0.61           | <0.001 | 0.10 (0.00, 0.56) | 0.12 (0.02, 0.36) | 0.62          | <0.001 |
|                             |                   | (1.62, 2.83) | (-0.02, 0.13)  |        |                      |                   | (0.02, 0.12)   |        |                   |                   | (0.48, 0.73)   |        |                   |                   | (0.62, 0.62)* |        |
| Australasia                 | 2.52 (2.06, 3.04) | 2.39         | -0.18          | <0.001 | 8.35 (7.51, 9.26)    | 7.93 (7.21, 8.71) | -0.18          | <0.001 | 0.92 (0.65, 1.26) | 0.85 (0.63, 1.14) | -0.22          | <0.001 | —                 | —                 | —             | —      |
|                             |                   | (2.00, 2.84) | (-0.24, -0.12) |        |                      |                   | (-0.20, -0.16) |        |                   |                   | (-0.30, -0.15) |        |                   |                   |               |        |
| <b>Men</b>                  |                   |              |                |        |                      |                   |                |        |                   |                   |                |        |                   |                   |               |        |
| Global                      | 3.14 (3.10, 3.14) | 2.89         | -0.28          | <0.001 | 10.43 (10.37, 10.43) | 9.61 (9.56, 9.61) | -0.28          | <0.001 | 1.30 (1.28, 1.30) | 1.29 (1.27, 1.29) | -0.03          | 0.193  | 0.01 (0.01, 0.01) | 0.01 (0.01, 0.01) | —             | —      |

|                              | 3.17)                      | (2.86, 2.91)      | (-0.32, -0.24)      |                      | 10.49)               | 9.66)                | (-0.32, -0.24)       |                      | 1.33)             | 1.31)             | (-0.07, 0.01)       | 0.01)                | 0.01)             |                   |                   |                    |
|------------------------------|----------------------------|-------------------|---------------------|----------------------|----------------------|----------------------|----------------------|----------------------|-------------------|-------------------|---------------------|----------------------|-------------------|-------------------|-------------------|--------------------|
| <b>SDI category</b>          |                            |                   |                     |                      |                      |                      |                      |                      |                   |                   |                     |                      |                   |                   |                   |                    |
| High                         | 5.79 (5.68, 5.90)          | 5.74 (5.64, 5.84) | -0.02 (-0.08, 0.04) | 0.528                | 19.21 (19.00, 19.42) | 19.04 (18.85, 19.23) | -0.02 (-0.09, 0.05)  | 0.548                | 2.15 (2.08, 2.22) | 2.10 (2.04, 2.17) | -0.07 (-0.19, 0.04) | 0.204                | 0.01 (0.01, 0.02) | 0.01 (0.01, 0.01) | —                 | —                  |
|                              | High-middle                | 3.43 (3.35, 3.50) | 3.21 (3.15, 3.27)   | -0.23 (-0.28, -0.18) | <0.001               | 11.38 (11.24, 11.51) | 10.68 (10.57, 10.80) | -0.21 (-0.25, -0.18) | <0.001            | 1.37 (1.32, 1.41) | 1.30 (1.26, 1.34)   | -0.19 (-0.27, -0.12) | <0.001            | 0.01 (0.00, 0.01) | 0.01 (0.00, 0.01) | 0.00 (0.00, 0.00)  |
| Middle                       |                            | 2.32 (2.26, 2.37) | 2.36 (2.32, 2.40)   | 0.06 (0.04, 0.09)    | <0.001               | 7.69 (7.59, 7.79)    | 7.82 (7.74, 7.90)    | 0.06 (0.03, 0.08)    | <0.001            | 1.09 (1.05, 1.12) | 1.21 (1.18, 1.24)   | 0.37 (0.27, 0.47)    | <0.001            | 0.01 (0.01, 0.01) | 0.01 (0.01, 0.01) | —                  |
|                              | Low-middle                 | 2.22 (2.16, 2.29) | 2.20 (2.15, 2.25)   | -0.03 (-0.05, -0.00) | 0.037                | 7.38 (7.25, 7.50)    | 7.29 (7.20, 7.39)    | -0.04 (-0.07, -0.01) | 0.003             | 0.96 (0.91, 1.00) | 1.07 (1.03, 1.10)   | 0.41 (0.28, 0.53)    | <0.001            | 0.01 (0.00, 0.01) | 0.01 (0.01, 0.01) | —                  |
| Low                          |                            | 1.79 (1.70, 1.89) | 1.79 (1.73, 1.85)   | 0.01 (-0.02, 0.05)   | 0.440                | 5.96 (5.78, 6.14)    | 5.94 (5.82, 6.05)    | -0.01 (-0.03, 0.01)  | 0.346             | 0.90 (0.83, 0.97) | 0.96 (0.91, 1.00)   | 0.21 (0.16, 0.26)    | <0.001            | 0.01 (0.00, 0.02) | 0.01 (0.00, 0.01) | 0.00 (0.00, 0.00)* |
|                              | <b>21 GBD region</b>       |                   |                     |                      |                      |                      |                      |                      |                   |                   |                     |                      |                   |                   |                   |                    |
| South Asia                   | 2.32 (2.25, 2.39)          | 2.31 (2.27, 2.36) | -0.01 (-0.05, 0.02) | 0.492                | 7.70 (7.57, 7.82)    | 7.68 (7.59, 7.77)    | -0.01 (-0.03, 0.01)  | 0.258                | 0.92 (0.88, 0.97) | 1.04 (1.00, 1.07) | 0.44 (0.32, 0.56)   | <0.001               | 0.01 (0.00, 0.01) | 0.01 (0.00, 0.01) | —                 | —                  |
|                              | East Asia                  | 2.45 (2.39, 2.51) | 2.58 (2.52, 2.63)   | 0.18 (0.10, 0.25)    | <0.001               | 8.14 (8.03, 8.25)    | 8.55 (8.45, 8.66)    | 0.17 (0.12, 0.21)    | <0.001            | 0.95 (0.92, 0.99) | 0.97 (0.93, 1.00)   | 0.04 (-0.03, 0.11)   | 0.300             | —                 | —                 | —                  |
| North Africa and Middle East |                            | 2.18 (2.05, 2.30) | 2.22 (2.14, 2.29)   | 0.07 (0.02, 0.12)    | 0.011                | 7.22 (7.00, 7.45)    | 7.35 (7.21, 7.49)    | 0.06 (0.03, 0.08)    | <0.001            | 1.02 (0.94, 1.11) | 1.04 (0.99, 1.10)   | 0.09 (0.01, 0.17)    | 0.025             | 0.01 (0.00, 0.02) | 0.01 (0.00, 0.01) | 0.00 (0.00, 0.00)* |
|                              | Western Sub-Saharan Africa | 1.72 (1.57, 1.88) | 1.79 (1.69, 1.89)   | 0.15 (0.10, 0.19)    | <0.001               | 5.71 (5.43, 6.00)    | 5.93 (5.74, 6.12)    | 0.14 (0.10, 0.17)    | <0.001            | 0.68 (0.59, 0.79) | 0.73 (0.67, 0.80)   | 0.28 (0.23, 0.33)    | <0.001            | —                 | —                 | —                  |
| Southeast Asia               |                            | 2.64 (2.53, 2.75) | 2.74 (2.65, 2.83)   | 0.12 (0.08, 0.16)    | <0.001               | 8.75 (8.54, 8.96)    | 9.08 (8.93, 9.24)    | 0.13 (0.11, 0.15)    | <0.001            | 1.38 (1.30, 1.47) | 1.72 (1.65, 1.79)   | 0.77 (0.68, 0.86)    | <0.001            | 0.01 (0.01, 0.02) | 0.02 (0.01, 0.03) | 2.34 (2.34, 2.34)  |
| 61                           |                            |                   |                     |                      |                      |                      |                      |                      |                   |                   |                     |                      |                   |                   |                   |                    |

|                             |                   | 2.82)             | 0.16)                |        |                      |                      | 0.15)                |        |                   | 0.86)             |                      |        |                   |                   | 2.34)                |        |
|-----------------------------|-------------------|-------------------|----------------------|--------|----------------------|----------------------|----------------------|--------|-------------------|-------------------|----------------------|--------|-------------------|-------------------|----------------------|--------|
| Eastern Sub-Saharan Africa  | 1.13 (1.01, 1.27) | 1.18 (1.09, 1.26) | 0.15 (0.09, 0.21)    | <0.001 | 3.76 (3.52, 4.01)    | 3.90 (3.75, 4.06)    | 0.12 (0.08, 0.16)    | <0.001 | 0.90 (0.79, 1.03) | 0.93 (0.86, 1.01) | 0.07 (0.01, 0.13)    | 0.027  | 0.01 (0.00, 0.03) | 0.01 (0.00, 0.02) | 0.00 (-0.00, 0.00)   | 1.000  |
| Central Latin America       | 1.25 (1.12, 1.39) | 1.27 (1.17, 1.37) | 0.06 (-0.00, 0.12)   | 0.067  | 4.14 (3.90, 4.40)    | 4.21 (4.03, 4.40)    | 0.07 (0.03, 0.10)    | <0.001 | 0.86 (0.75, 0.98) | 0.86 (0.78, 0.95) | 0.03 (-0.24, 0.30)   | 0.836  | 0.01 (0.00, 0.03) | 0.01 (0.00, 0.02) | 0.00 (0.00, 0.00)*   | <0.001 |
| Tropical Latin America      | 1.89 (1.73, 2.07) | 1.90 (1.78, 2.02) | 0.11 (0.02, 0.19)    | 0.013  | 6.29 (5.99, 6.59)    | 6.30 (6.08, 6.52)    | 0.10 (0.02, 0.19)    | 0.016  | 1.45 (1.31, 1.60) | 1.43 (1.33, 1.54) | 0.01 (-0.24, 0.26)   | 0.936  | 0.02 (0.01, 0.04) | 0.02 (0.01, 0.03) | 0.04 (-8.30, 9.14)   | 0.993  |
| Central Sub-Saharan Africa  | 1.60 (1.34, 1.91) | 1.63 (1.46, 1.82) | 0.06 (0.03, 0.09)    | <0.001 | 5.32 (4.82, 5.87)    | 5.42 (5.10, 5.75)    | 0.07 (0.05, 0.08)    | <0.001 | 0.95 (0.75, 1.20) | 0.97 (0.84, 1.12) | 0.09 (-0.12, 0.30)   | 0.405  | 0.01 (0.00, 0.07) | 0.01 (0.00, 0.04) | 0.00 (0.00, 0.00)*   | <0.001 |
| Western Europe              | 6.09 (5.92, 6.27) | 5.60 (5.44, 5.77) | -0.28 (-0.32, -0.25) | <0.001 | 20.22 (19.90, 20.55) | 18.58 (18.28, 18.88) | -0.28 (-0.31, -0.26) | <0.001 | 2.51 (2.40, 2.62) | 2.17 (2.07, 2.27) | -0.51 (-0.61, -0.40) | <0.001 | 0.01 (0.01, 0.03) | 0.01 (0.00, 0.02) | 0.00 (0.00, 0.00)*   | <0.001 |
| High-income North America   | 6.71 (6.51, 6.92) | 8.03 (7.82, 8.25) | 0.62 (0.59, 0.66)    | <0.001 | 22.29 (21.92, 22.66) | 26.67 (26.28, 27.06) | 0.63 (0.57, 0.69)    | <0.001 | 2.25 (2.14, 2.37) | 2.73 (2.61, 2.86) | 0.69 (0.62, 0.76)    | <0.001 | 0.01 (0.00, 0.02) | 0.01 (0.00, 0.02) | 0.00 (0.00, 0.00)*   | <0.001 |
| Central Asia                | 3.89 (3.55, 4.26) | 4.07 (3.79, 4.37) | 0.16 (0.14, 0.19)    | <0.001 | 12.91 (12.27, 13.58) | 13.51 (12.99, 14.05) | 0.16 (0.14, 0.18)    | <0.001 | 1.50 (1.29, 1.74) | 1.63 (1.46, 1.83) | 0.29 (0.11, 0.48)    | 0.002  | 0.01 (0.00, 0.05) | 0.01 (0.00, 0.04) | 0.00 (0.00, 0.00)*   | <0.001 |
| Eastern Europe              | 4.77 (4.58, 4.96) | 5.07 (4.87, 5.28) | 0.22 (0.20, 0.25)    | <0.001 | 15.82 (15.47, 16.18) | 16.82 (16.45, 17.20) | 0.21 (0.19, 0.24)    | <0.001 | 1.57 (1.46, 1.68) | 1.75 (1.63, 1.87) | 0.38 (0.28, 0.48)    | <0.001 | —                 | 0.01 (0.00, 0.02) | —                    | —      |
| Southern Sub-Saharan Africa | 1.83 (1.55, 2.15) | 1.84 (1.64, 2.06) | 0.02 (-0.05, 0.08)   | 0.574  | 6.08 (5.56, 6.63)    | 6.11 (5.74, 6.50)    | 0.02 (0.01, 0.04)    | 0.012  | 1.95 (1.67, 2.28) | 1.67 (1.48, 1.87) | -0.68 (-1.20, -0.16) | 0.010  | 0.03 (0.00, 0.09) | 0.02 (0.01, 0.06) | -1.42 (-1.42, -1.42) | <0.001 |
| High-income Asia Pacific    | 4.80 (4.58, 5.04) | 4.89 (4.66, 5.14) | 0.06 (0.02, 0.09)    | 0.006  | 15.90 (15.49, 16.32) | 16.24 (15.82, 16.67) | 0.06 (0.04, 0.09)    | <0.001 | 1.86 (1.72, 2.00) | 1.78 (1.64, 1.93) | -0.14 (-0.23, -0.06) | <0.001 | 0.01 (0.00, 0.03) | 0.01 (0.00, 0.03) | 0.00 (0.00, 0.00)*   | <0.001 |
| Central Europe              | 4.91 (4.65, 5.19) | 4.86 (4.58, —)    | -0.03 (-0.07, —)     | 0.158  | 16.31 (15.83, 16.80) | 16.13 (15.62, —)     | -0.03 (-0.09, —)     | 0.307  | 1.89 (1.73, 2.06) | 1.83 (1.67, 2.02) | -0.12 (-0.17, —)     | <0.001 | 0.01 (0.00, 0.03) | 0.01 (0.00, 0.04) | 0.00 (-0.00, —)      | 1.000  |

|                        |                   |                   |                      |        |                      |                      |                      |        |                      |                      |                      |        |                   |                   |                      |        |
|------------------------|-------------------|-------------------|----------------------|--------|----------------------|----------------------|----------------------|--------|----------------------|----------------------|----------------------|--------|-------------------|-------------------|----------------------|--------|
|                        |                   | 5.15)             | 0.01)                |        |                      | 16.65)               | 0.03)                |        |                      |                      | -0.06)               |        |                   |                   | 0.00)                |        |
| Andean Latin America   | 0.41 (0.27, 0.61) | 0.47 (0.36, 0.61) | 0.46 (0.25, 0.67)    | <0.001 | 1.37 (1.09, 1.70)    | 1.56 (1.35, 1.80)    | 0.45 (0.39, 0.52)    | <0.001 | 1.11 (0.86, 1.41)    | 1.08 (0.90, 1.28)    | -0.11 (-0.41, 0.18)  | 0.453  | 0.02 (0.00, 0.10) | 0.02 (0.00, 0.06) | 0.00 (0.00, 0.00)*   | <0.001 |
| Caribbean              | 1.21 (0.94, 1.52) | 1.25 (1.02, 1.50) | 0.11 (0.07, 0.15)    | <0.001 | 4.01 (3.51, 4.56)    | 4.13 (3.72, 4.58)    | 0.10 (0.06, 0.14)    | <0.001 | 1.20 (0.93, 1.51)    | 1.27 (1.04, 1.53)    | 0.20 (0.01, 0.39)    | 0.042  | 0.02 (0.00, 0.09) | 0.02 (0.00, 0.07) | -0.11 (-0.11, -0.11) | <0.001 |
| Southern Latin America | 2.93 (2.59, 3.31) | 3.03 (2.74, 3.35) | 0.11 (0.05, 0.16)    | <0.001 | 9.73 (9.09, 10.40)   | 10.07 (9.53, 10.63)  | 0.11 (0.07, 0.15)    | <0.001 | 1.42 (1.19, 1.69)    | 1.42 (1.22, 1.64)    | -0.01 (-0.26, 0.24)  | 0.927  | 0.01 (0.00, 0.06) | 0.01 (0.00, 0.05) | 0.00 (0.00, 0.00)*   | <0.001 |
| Oceania                | 2.55 (1.69, 3.71) | 2.58 (1.98, 3.31) | 0.03 (-0.02, 0.09)   | 0.263  | 8.47 (6.81, 10.42)   | 8.56 (7.43, 9.82)    | 0.03 (0.01, 0.05)    | 0.002  | 3.51 (2.48, 4.81)    | 4.10 (3.33, 4.98)    | 0.52 (0.40, 0.65)    | <0.001 | 0.05 (0.00, 0.45) | 0.06 (0.00, 0.27) | 0.62 (0.62, 0.62)    | <0.001 |
| Australasia            | 6.97 (6.20, 7.81) | 6.67 (6.00, 7.40) | -0.14 (-0.18, -0.10) | <0.001 | 23.13 (21.71, 24.62) | 22.13 (20.90, 23.42) | -0.15 (-0.18, -0.11) | <0.001 | 2.35 (1.91, 2.86)    | 2.27 (1.89, 2.72)    | -0.07 (-0.40, 0.26)  | 0.669  | 0.01 (0.00, 0.11) | 0.01 (0.00, 0.10) | 0.00 (0.00, 0.00)*   | <0.001 |
| <b>Aortic aneurysm</b> |                   |                   |                      |        |                      |                      |                      |        |                      |                      |                      |        |                   |                   |                      |        |
| <b>Overall</b>         |                   |                   |                      |        |                      |                      |                      |        |                      |                      |                      |        |                   |                   |                      |        |
| Global                 | —                 | —                 | —                    | —      | —                    | —                    | —                    | —      | 8.04 (8.00, 8.08)    | 8.07 (8.04, 8.10)    | 0.01 (-0.19, 0.21)   | 0.933  | 0.14 (0.14, 0.15) | 0.14 (0.14, 0.15) | —                    | —      |
| <b>SDI category</b>    |                   |                   |                      |        |                      |                      |                      |        |                      |                      |                      |        |                   |                   |                      |        |
| High                   | —                 | —                 | —                    | —      | —                    | —                    | —                    | —      | 10.82 (10.71, 10.94) | 8.92 (8.82, 9.02)    | -0.70 (-0.95, -0.45) | <0.001 | 0.19 (0.17, 0.20) | 0.16 (0.14, 0.17) | -0.60 (-0.77, -0.43) | <0.001 |
| High-middle            | —                 | —                 | —                    | —      | —                    | —                    | —                    | —      | 10.05 (9.96, 10.14)  | 10.79 (10.71, 10.88) | 0.25 (-0.07, 0.57)   | 0.126  | 0.18 (0.16, 0.19) | 0.19 (0.18, 0.20) | 0.23 (-0.05, 0.51)   | 0.103  |
| Middle                 | —                 | —                 | —                    | —      | —                    | —                    | —                    | —      | 6.60 (6.54, 6.66)    | 7.13 (7.08, 7.18)    | 0.28 (0.06, 0.51)    | 0.013  | 0.11 (0.11, 0.12) | 0.12 (0.12, 0.13) | 0.23 (0.23, 0.23)    | <0.001 |

|                              |   |   |   |   |   |   |   |   |                      |                      |                      |        |                   |                   |                      |        |
|------------------------------|---|---|---|---|---|---|---|---|----------------------|----------------------|----------------------|--------|-------------------|-------------------|----------------------|--------|
| Low-middle                   | — | — | — | — | — | — | — | — | 5.83 (5.75, 5.90)    | 7.21 (7.15, 7.28)    | 0.74 (0.48, 0.99)    | <0.001 | 0.10 (0.09, 0.11) | 0.13 (0.12, 0.14) | 1.06 (0.12, 2.01)    | 0.028  |
| Low                          | — | — | — | — | — | — | — | — | 7.93 (7.80, 8.07)    | 7.19 (7.10, 7.27)    | -0.33 (-0.60, -0.07) | 0.015  | 0.14 (0.12, 0.16) | 0.13 (0.11, 0.14) | -0.23 (-0.56, 0.11)  | 0.185  |
| <b>21 GBD region</b>         |   |   |   |   |   |   |   |   |                      |                      |                      |        |                   |                   |                      |        |
| South Asia                   | — | — | — | — | — | — | — | — | 4.95 (4.88, 5.02)    | 6.16 (6.10, 6.22)    | 0.83 (0.37, 1.28)    | <0.001 | 0.09 (0.08, 0.10) | 0.11 (0.10, 0.12) | 0.87 (-0.14, 1.90)   | 0.091  |
| East Asia                    | — | — | — | — | — | — | — | — | 6.24 (6.18, 6.31)    | 6.81 (6.74, 6.88)    | 0.31 (-0.09, 0.70)   | 0.125  | 0.11 (0.10, 0.12) | 0.12 (0.11, 0.13) | 0.31 (-0.13, 0.75)   | 0.166  |
| North Africa and Middle East | — | — | — | — | — | — | — | — | 8.87 (8.70, 9.04)    | 7.16 (7.06, 7.26)    | -0.75 (-0.87, -0.62) | <0.001 | 0.15 (0.13, 0.18) | 0.12 (0.11, 0.14) | -0.80 (-1.11, -0.48) | <0.001 |
| Western Sub-Saharan Africa   | — | — | — | — | — | — | — | — | 7.87 (7.65, 8.10)    | 6.26 (6.14, 6.39)    | -0.77 (-0.91, -0.63) | <0.001 | 0.14 (0.11, 0.18) | 0.11 (0.09, 0.13) | -0.82 (-1.28, -0.36) | <0.001 |
| Southeast Asia               | — | — | — | — | — | — | — | — | 5.31 (5.20, 5.42)    | 7.09 (6.99, 7.19)    | 1.00 (0.78, 1.22)    | <0.001 | 0.09 (0.08, 0.11) | 0.12 (0.11, 0.14) | 1.00 (0.20, 1.80)    | 0.014  |
| Eastern Sub-Saharan Africa   | — | — | — | — | — | — | — | — | 12.27 (11.99, 12.55) | 9.47 (9.31, 9.63)    | -0.90 (-1.11, -0.68) | <0.001 | 0.21 (0.18, 0.25) | 0.16 (0.14, 0.19) | -0.94 (-1.54, -0.33) | 0.003  |
| Central Latin America        | — | — | — | — | — | — | — | — | 7.42 (7.21, 7.64)    | 7.11 (6.95, 7.28)    | -0.09 (-0.28, 0.10)  | 0.342  | 0.13 (0.10, 0.16) | 0.12 (0.10, 0.15) | -0.29 (-1.01, 0.43)  | 0.423  |
| Tropical Latin America       | — | — | — | — | — | — | — | — | 15.37 (15.06, 15.69) | 18.43 (18.16, 18.71) | 0.67 (0.48, 0.87)    | <0.001 | 0.27 (0.23, 0.32) | 0.32 (0.29, 0.36) | 0.59 (0.31, 0.88)    | <0.001 |
| Central Sub-Saharan          | — | — | — | — | — | — | — | — | 9.91 (9.45, 10.38)   | 8.20 (7.94, 8.47)    | -0.70 (-0.94, 0.00)  | <0.001 | 0.17 (0.12, 0.25) | 0.14 (0.11, 0.18) | -0.74 (-1.20, 0.00)  | 0.002  |







|                              |   |   |   |   |   |   |   |   |                    |                      |                      |        |                   |                   |                       |        |
|------------------------------|---|---|---|---|---|---|---|---|--------------------|----------------------|----------------------|--------|-------------------|-------------------|-----------------------|--------|
| North Africa and Middle East | — | — | — | — | — | — | — | — | 3.62 (3.48, 3.78)  | 3.72 (3.61, 3.83)    | 0.11 (0.03, 0.18)    | 0.004  | 0.06 (0.04, 0.08) | 0.06 (0.05, 0.08) | -0.00 (-0.00, -0.00)* | <0.001 |
| Western Sub-Saharan Africa   | — | — | — | — | — | — | — | — | 6.61 (6.32, 6.92)  | 3.57 (3.44, 3.70)    | -2.10 (-2.28, -1.93) | <0.001 | 0.12 (0.08, 0.17) | 0.06 (0.05, 0.09) | -2.43 (-2.86, -2.01)  | <0.001 |
| Southeast Asia               | — | — | — | — | — | — | — | — | 3.43 (3.31, 3.55)  | 4.59 (4.48, 4.71)    | 1.01 (0.91, 1.12)    | <0.001 | 0.06 (0.05, 0.08) | 0.08 (0.07, 0.10) | 1.00 (0.61, 1.39)     | <0.001 |
| Eastern Sub-Saharan Africa   | — | — | — | — | — | — | — | — | 7.32 (7.02, 7.63)  | 5.48 (5.31, 5.65)    | -1.00 (-1.16, -0.84) | <0.001 | 0.13 (0.09, 0.18) | 0.10 (0.07, 0.12) | -0.90 (-1.53, -0.26)  | 0.006  |
| Central Latin America        | — | — | — | — | — | — | — | — | 4.61 (4.37, 4.85)  | 4.13 (3.95, 4.31)    | -0.36 (-0.67, -0.05) | 0.023  | 0.08 (0.05, 0.12) | 0.07 (0.05, 0.10) | -0.43 (-1.28, 0.43)   | 0.324  |
| Tropical Latin America       | — | — | — | — | — | — | — | — | 9.79 (9.44, 10.15) | 11.30 (11.00, 11.61) | 0.55 (0.31, 0.79)    | <0.001 | 0.18 (0.13, 0.23) | 0.20 (0.16, 0.24) | 0.43 (-0.14, 1.00)    | 0.137  |
| Central Sub-Saharan Africa   | — | — | — | — | — | — | — | — | 5.32 (4.85, 5.82)  | 4.35 (4.09, 4.64)    | -0.73 (-0.90, -0.55) | <0.001 | 0.09 (0.04, 0.18) | 0.08 (0.04, 0.12) | -0.35 (-0.90, 0.20)   | 0.208  |
| Western Europe               | — | — | — | — | — | — | — | — | 5.45 (5.28, 5.62)  | 4.25 (4.09, 4.41)    | -0.87 (-1.12, -0.61) | <0.001 | 0.09 (0.07, 0.12) | 0.07 (0.05, 0.10) | -1.15 (-1.67, -0.63)  | <0.001 |
| High-income North America    | — | — | — | — | — | — | — | — | 6.59 (6.39, 6.80)  | 5.39 (5.21, 5.57)    | -0.71 (-0.97, -0.45) | <0.001 | 0.11 (0.09, 0.15) | 0.09 (0.07, 0.12) | -0.67 (-0.67, -0.67)  | <0.001 |
| Central Asia                 | — | — | — | — | — | — | — | — | 3.05 (2.76, 3.36)  | 4.22 (3.93, 4.52)    | 1.11 (0.88, 1.34)    | <0.001 | 0.05 (0.02, 0.11) | 0.07 (0.04, 0.13) | 1.00 (1.00, 1.00)     | <0.001 |
| Eastern Europe               | — | — | — | — | — | — | — | — | 5.95 (5.73, 6.19)  | 8.83 (8.53, 9.14)    | 1.47 (0.61, 2.34)    | 0.001  | 0.10 (0.08, 0.14) | 0.15 (0.12, 0.20) | 1.48 (0.37, 2.61)     | 0.009  |

|                     |   |   |   |   |   |   |   |   |   |               |               |         |        |             |             |         |        |
|---------------------|---|---|---|---|---|---|---|---|---|---------------|---------------|---------|--------|-------------|-------------|---------|--------|
| Southern            |   |   |   |   |   |   |   |   |   | 16.26 (15.48, | 7.08 (6.69,   | -2.82   |        | 0.28 (0.19, | 0.12 (0.08, | -2.80   |        |
| Sub-Saharan         | — | — | — | — | — | — | — | — | — | 17.07)        | 7.49)         | (-3.68, | <0.001 | 0.41)       | 0.19)       | (-3.89, | <0.001 |
| Africa              |   |   |   |   |   |   |   |   |   |               |               | -1.96)  |        |             |             | -1.70)  |        |
| High-income Asia    |   |   |   |   |   |   |   |   |   | 2.81 (2.63,   | 3.59 (3.37,   | 0.87    |        | 0.05 (0.03, | 0.06 (0.04, | 0.62    |        |
| Pacific             | — | — | — | — | — | — | — | — | — | 3.00)         | 3.83)         | (0.75,  | <0.001 | 0.08)       | 0.10)       | (-0.35, | 0.210  |
|                     |   |   |   |   |   |   |   |   |   |               |               | 0.99)   |        |             |             | 1.60)   |        |
| Central Europe      | — | — | — | — | — | — | — | — | — | 6.95 (6.62,   | 7.64 (7.25,   | 0.32    |        | 0.12 (0.08, | 0.13 (0.09, | 0.34    |        |
|                     |   |   |   |   |   |   |   |   |   | 7.30)         | 8.05)         | (0.15,  | <0.001 | 0.18)       | 0.20)       | (-0.22, | 0.235  |
|                     |   |   |   |   |   |   |   |   |   |               |               | 0.49)   |        |             |             | 0.89)   |        |
| Andean Latin        |   |   |   |   |   |   |   |   |   | 5.39 (4.87,   | 5.03 (4.65,   | -0.25   |        | 0.09 (0.04, | 0.08 (0.04, | -0.39   |        |
| America             | — | — | — | — | — | — | — | — | — | 5.95)         | 5.44)         | (-0.92, | 0.478  | 0.20)       | 0.15)       | (-0.39, | <0.001 |
|                     |   |   |   |   |   |   |   |   |   |               |               | 0.43)   |        |             |             | -0.39)  |        |
| Caribbean           | — | — | — | — | — | — | — | — | — | 4.19 (3.73,   | 4.55 (4.12,   | 0.28    |        | 0.07 (0.02, | 0.08 (0.03, | 0.64    |        |
|                     |   |   |   |   |   |   |   |   |   | 4.71)         | 5.00)         | (0.12,  | <0.001 | 0.17)       | 0.16)       | (-0.26, | 0.163  |
|                     |   |   |   |   |   |   |   |   |   |               |               | 0.43)   |        |             |             | 1.55)   |        |
| Southern Latin      |   |   |   |   |   |   |   |   |   | 6.05 (5.57,   | 5.68 (5.27,   | -0.24   |        | 0.10 (0.05, | 0.10 (0.05, | -0.31   |        |
| America             | — | — | — | — | — | — | — | — | — | 6.57)         | 6.10)         | (-0.50, | 0.079  | 0.19)       | 0.17)       | (-0.83, | 0.243  |
|                     |   |   |   |   |   |   |   |   |   |               |               | 0.03)   |        |             |             | 0.21)   |        |
| Oceania             | — | — | — | — | — | — | — | — | — | 3.73 (2.66,   | 3.30 (2.63,   | -0.41   |        | 0.07 (0.00, | 0.06 (0.00, | -0.52   |        |
|                     |   |   |   |   |   |   |   |   |   | 5.10)         | 4.10)         | (-0.56, | <0.001 | 0.50)       | 0.26)       | (-0.52, | <0.001 |
|                     |   |   |   |   |   |   |   |   |   |               |               | -0.26)  |        |             |             | -0.52)  |        |
| Australasia         | — | — | — | — | — | — | — | — | — | 5.45 (4.76,   | 2.98 (2.53,   | -2.03   |        | 0.09 (0.03, | 0.05 (0.01, | -2.00   |        |
|                     |   |   |   |   |   |   |   |   |   | 6.20)         | 3.50)         | (-2.20, | <0.001 | 0.25)       | 0.18)       | (-2.58, | <0.001 |
|                     |   |   |   |   |   |   |   |   |   |               |               | -1.86)  |        |             |             | -1.41)  |        |
| <b>Men</b>          |   |   |   |   |   |   |   |   |   |               |               |         |        |             |             |         |        |
| Global              | — | — | — | — | — | — | — | — | — | 11.60 (11.53, | 11.82 (11.77, | 0.06    |        | 0.20 (0.19, | 0.21 (0.20, | 0.20    |        |
|                     |   |   |   |   |   |   |   |   |   | 11.66)        | 11.88)        | (-0.13, | 0.564  | 0.21)       | 0.22)       | (-0.38, | 0.507  |
|                     |   |   |   |   |   |   |   |   |   |               |               | 0.24)   |        |             |             | 0.78)   |        |
| <b>SDI category</b> |   |   |   |   |   |   |   |   |   |               |               |         |        |             |             |         |        |
| High                | — | — | — | — | — | — | — | — | — | 16.13 (15.94, | 13.15 (12.99, | -0.75   |        | 0.28 (0.26, | 0.23 (0.21, | -0.63   |        |
|                     |   |   |   |   |   |   |   |   |   | 16.33)        | 13.32)        | (-0.99, | <0.001 | 0.31)       | 0.26)       | (-0.80, | <0.001 |
|                     |   |   |   |   |   |   |   |   |   |               |               | -0.52)  |        |             |             | -0.45)  |        |
| High-middle         | — | — | — | — | — | — | — | — | — | 15.07 (14.91, | 16.26 (16.11, | 0.22    | 0.078  | 0.26 (0.24, | 0.29 (0.27, | 0.28    | 0.078  |

|                              |   |   |   |   |   |   |   |   |                      |                      |                      |        |                   |                   |                |        |
|------------------------------|---|---|---|---|---|---|---|---|----------------------|----------------------|----------------------|--------|-------------------|-------------------|----------------|--------|
|                              |   |   |   |   |   |   |   |   | 15.22)               | 16.41)               | (-0.03, 0.46)        |        | 0.28)             | 0.31)             | (-0.03, 0.59)  |        |
| Middle                       | — | — | — | — | — | — | — | — | 9.08 (8.98, 9.18)    | 10.21 (10.13, 10.31) | (0.14, 0.71)         | 0.003  | 0.16 (0.15, 0.17) | 0.18 (0.17, 0.19) | (0.42, 0.42)   | <0.001 |
| Low-middle                   | — | — | — | — | — | — | — | — | 8.10 (7.98, 8.23)    | 10.26 (10.16, 10.37) | (0.60, 1.17)         | <0.001 | 0.14 (0.13, 0.16) | 0.18 (0.17, 0.20) | (0.63, 1.32)   | <0.001 |
| Low                          | — | — | — | — | — | — | — | — | 11.20 (10.98, 11.43) | 10.52 (10.38, 10.67) | (-0.24, -0.48, 0.01) | 0.058  | 0.20 (0.17, 0.23) | 0.18 (0.17, 0.20) | (-0.36, -0.36) | <0.001 |
| <b>21 GBD region</b>         |   |   |   |   |   |   |   |   |                      |                      |                      |        |                   |                   |                |        |
| South Asia                   | — | — | — | — | — | — | — | — | 7.10 (6.99, 7.22)    | 8.85 (8.76, 8.95)    | (0.25, 1.45)         | 0.006  | 0.13 (0.11, 0.14) | 0.16 (0.14, 0.17) | (-0.06, 1.44)  | 0.073  |
| East Asia                    | — | — | — | — | — | — | — | — | 8.96 (8.85, 9.07)    | 10.54 (10.42, 10.66) | (0.15, 1.01)         | 0.009  | 0.16 (0.14, 0.17) | 0.19 (0.17, 0.20) | (-0.31, 1.51)  | 0.196  |
| North Africa and Middle East | — | — | — | — | — | — | — | — | 13.83 (13.53, 14.12) | 10.27 (10.11, 10.45) | (-1.20, -0.86)       | <0.001 | 0.24 (0.20, 0.28) | 0.18 (0.16, 0.20) | (-1.44, -0.53) | <0.001 |
| Western Sub-Saharan Africa   | — | — | — | — | — | — | — | — | 9.30 (8.96, 9.65)    | 9.26 (9.04, 9.48)    | (-0.17, 0.17)        | 0.987  | 0.16 (0.12, 0.22) | 0.16 (0.13, 0.19) | (-0.43, 0.30)  | 0.727  |
| Southeast Asia               | — | — | — | — | — | — | — | — | 7.24 (7.07, 7.42)    | 9.53 (9.37, 9.69)    | (0.64, 1.38)         | <0.001 | 0.12 (0.10, 0.15) | 0.16 (0.14, 0.19) | (0.66, 1.23)   | <0.001 |
| Eastern Sub-Saharan Africa   | — | — | — | — | — | — | — | — | 17.63 (17.15, 18.12) | 13.72 (13.44, 13.99) | (-1.05, -0.66)       | <0.001 | 0.31 (0.24, 0.38) | 0.24 (0.20, 0.28) | (-1.27, -0.59) | <0.001 |
| Central Latin America        | — | — | — | — | — | — | — | — | 10.41 (10.05, 10.79) | 10.27 (9.99, 10.56)  | (-0.28, 0.22)        | 0.827  | 0.18 (0.13, 0.24) | 0.18 (0.14, 0.22) | (-0.63, 0.61)  | 0.964  |

|                             |   |   |   |   |   |   |   |   |                      |                      |                      |        |                   |                   |                      |        |
|-----------------------------|---|---|---|---|---|---|---|---|----------------------|----------------------|----------------------|--------|-------------------|-------------------|----------------------|--------|
| Tropical Latin America      | — | — | — | — | — | — | — | — | 21.18 (20.65, 21.72) | 25.74 (25.28, 26.21) | 0.68 (0.43, 0.94)    | <0.001 | 0.38 (0.31, 0.46) | 0.45 (0.39, 0.52) | 0.62 (0.22, 1.03)    | 0.003  |
| Central Sub-Saharan Africa  | — | — | — | — | — | — | — | — | 14.62 (13.84, 15.44) | 12.12 (11.67, 12.58) | -0.69 (-1.00, -0.39) | <0.001 | 0.25 (0.16, 0.39) | 0.21 (0.16, 0.28) | -0.65 (-0.98, -0.32) | <0.001 |
| Western Europe              | — | — | — | — | — | — | — | — | 17.53 (17.23, 17.84) | 11.66 (11.41, 11.91) | -1.42 (-1.66, -1.19) | <0.001 | 0.30 (0.26, 0.35) | 0.20 (0.17, 0.24) | -1.48 (-1.86, -1.11) | <0.001 |
| High-income North America   | — | — | — | — | — | — | — | — | 19.73 (19.37, 20.09) | 16.12 (15.81, 16.43) | -0.76 (-1.15, -0.37) | <0.001 | 0.34 (0.30, 0.39) | 0.29 (0.25, 0.33) | -0.57 (-1.06, -0.08) | 0.023  |
| Central Asia                | — | — | — | — | — | — | — | — | 8.51 (8.02, 9.02)    | 12.59 (12.10, 13.10) | 1.37 (0.73, 2.01)    | <0.001 | 0.15 (0.09, 0.23) | 0.22 (0.16, 0.30) | 1.32 (0.72, 1.92)    | <0.001 |
| Eastern Europe              | — | — | — | — | — | — | — | — | 18.40 (18.01, 18.80) | 32.93 (32.36, 33.51) | 2.14 (1.33, 2.97)    | <0.001 | 0.32 (0.27, 0.38) | 0.58 (0.51, 0.66) | 2.22 (0.94, 3.51)    | 0.001  |
| Southern Sub-Saharan Africa | — | — | — | — | — | — | — | — | 23.75 (22.76, 24.77) | 16.41 (15.81, 17.04) | -1.36 (-2.08, -0.63) | <0.001 | 0.42 (0.30, 0.58) | 0.29 (0.21, 0.38) | -1.40 (-2.29, -0.50) | 0.002  |
| High-income Asia Pacific    | — | — | — | — | — | — | — | — | 9.57 (9.24, 9.90)    | 12.10 (11.71, 12.50) | 0.82 (0.54, 1.11)    | <0.001 | 0.17 (0.13, 0.22) | 0.22 (0.17, 0.28) | 0.92 (0.45, 1.38)    | <0.001 |
| Central Europe              | — | — | — | — | — | — | — | — | 21.28 (20.71, 21.87) | 23.16 (22.50, 23.84) | 0.27 (-0.07, 0.60)   | 0.115  | 0.37 (0.30, 0.46) | 0.41 (0.32, 0.51) | 0.31 (0.04, 0.58)    | 0.024  |
| Andean Latin America        | — | — | — | — | — | — | — | — | 10.69 (9.92, 11.49)  | 9.51 (8.98, 10.07)   | -0.38 (-0.77, 0.02)  | 0.063  | 0.18 (0.10, 0.32) | 0.16 (0.10, 0.25) | -0.42 (-0.81, -0.02) | 0.039  |
| Caribbean                   | — | — | — | — | — | — | — | — | 11.34 (10.54, 12.19) | 10.93 (10.25, 11.64) | -0.08 (-0.30, 0.14)  | 0.482  | 0.20 (0.10, 0.34) | 0.19 (0.11, 0.31) | -0.13 (-0.38, 0.12)  | 0.315  |

|                        | Rate              | 95% CI            | Rate               | 95% CI | P                 | Rate              | 95% CI               | Rate   | 95% CI               | P                    | Rate                 | 95% CI               | Rate                 | 95% CI            | P                    |                   |                      |        |
|------------------------|-------------------|-------------------|--------------------|--------|-------------------|-------------------|----------------------|--------|----------------------|----------------------|----------------------|----------------------|----------------------|-------------------|----------------------|-------------------|----------------------|--------|
| Southern Latin America | —                 | —                 | —                  | —      | —                 | —                 | —                    | —      | —                    | —                    | 14.25 (13.49, 15.04) | 14.65 (14.00, 15.33) | 0.14 (-0.14, 0.43)   | 0.323             | 0.25 (0.16, 0.37)    | 0.25 (0.18, 0.36) | 0.10 (-0.26, 0.46)   | 0.599  |
| Oceania                | —                 | —                 | —                  | —      | —                 | —                 | —                    | —      | —                    | —                    | 23.08 (20.42, 26.01) | 21.64 (19.88, 23.52) | -0.23 (-0.34, -0.13) | <0.001            | 0.41 (0.13, 0.99)    | 0.38 (0.18, 0.71) | -0.26 (-0.40, -0.11) | 0.001  |
| Australasia            | —                 | —                 | —                  | —      | —                 | —                 | —                    | —      | —                    | —                    | 16.14 (14.94, 17.41) | 8.20 (7.44, 9.02)    | -2.35 (-2.73, -1.96) | <0.001            | 0.28 (0.14, 0.50)    | 0.15 (0.06, 0.30) | -2.27 (-2.96, -1.57) | <0.001 |
| <b>Endocarditis</b>    |                   |                   |                    |        |                   |                   |                      |        |                      |                      |                      |                      |                      |                   |                      |                   |                      |        |
| <b>Overall</b>         |                   |                   |                    |        |                   |                   |                      |        |                      |                      |                      |                      |                      |                   |                      |                   |                      |        |
| Global                 | 5.53 (5.50, 5.56) | 5.73 (5.70, 5.76) | 0.13 (0.08, 0.18)  | <0.001 | 0.97 (0.95, 0.98) | 0.96 (0.95, 0.97) | -0.02 (-0.09, 0.06)  | 0.672  | 13.11 (13.06, 13.15) | 13.50 (13.46, 13.54) | 0.09 (-0.12, 0.30)   | 0.390                | 0.22 (0.21, 0.23)    | 0.23 (0.22, 0.23) | 0.15 (-0.11, 0.40)   | 0.255             |                      |        |
| <b>SDI category</b>    |                   |                   |                    |        |                   |                   |                      |        |                      |                      |                      |                      |                      |                   |                      |                   |                      |        |
| High                   | 6.35 (6.26, 6.43) | 6.43 (6.35, 6.52) | 0.04 (0.01, 0.07)  | 0.024  | 1.98 (1.93, 2.03) | 1.87 (1.82, 1.91) | -0.19 (-0.29, -0.09) | <0.001 | 7.49 (7.39, 7.58)    | 8.94 (8.84, 9.04)    | 0.60 (0.44, 0.76)    | <0.001               | 0.12 (0.11, 0.14)    | 0.15 (0.14, 0.17) | 0.84 (0.38, 1.31)    | <0.001            |                      |        |
| High-middle            | 6.56 (6.49, 6.63) | 6.98 (6.91, 7.06) | 0.21 (0.12, 0.30)  | <0.001 | 0.92 (0.89, 0.94) | 1.05 (1.02, 1.07) | 0.46 (0.38, 0.54)    | <0.001 | 12.54 (12.44, 12.64) | 14.04 (13.94, 14.14) | 0.39 (-0.25, 1.04)   | 0.234                | 0.21 (0.20, 0.22)    | 0.24 (0.23, 0.25) | 0.53 (0.08, 0.97)    | 0.020             |                      |        |
| Middle                 | 5.94 (5.88, 5.99) | 5.96 (5.91, 6.01) | 0.03 (-0.02, 0.08) | 0.256  | 0.91 (0.89, 0.93) | 0.98 (0.96, 1.00) | 0.26 (0.17, 0.34)    | <0.001 | 14.99 (14.90, 15.08) | 14.21 (14.14, 14.29) | -0.18 (-0.36, 0.01)  | 0.067                | 0.25 (0.24, 0.26)    | 0.24 (0.23, 0.25) | -0.13 (-0.47, 0.22)  | 0.467             |                      |        |
| Low-middle             | 3.86 (3.80, 3.92) | 4.85 (4.79, 4.90) | 0.80 (0.74, 0.86)  | <0.001 | 0.49 (0.47, 0.51) | 0.62 (0.60, 0.63) | 0.82 (0.72, 0.92)    | <0.001 | 13.62 (13.51, 13.73) | 13.72 (13.64, 13.81) | 0.02 (-0.18, 0.23)   | 0.836                | 0.23 (0.21, 0.24)    | 0.23 (0.22, 0.24) | 0.08 (-0.18, 0.34)   | 0.567             |                      |        |
| Low                    | 3.52 (3.44, 3.61) | 4.34 (4.28, 4.41) | 0.76 (0.64, 0.89)  | <0.001 | 0.55 (0.52, 0.59) | 0.67 (0.64, 0.69) | 0.70 (0.61, 0.79)    | <0.001 | 16.28 (16.09, 16.47) | 14.21 (14.09, 14.32) | -0.47 (-0.62, -0.32) | <0.001               | 0.27 (0.25, 0.30)    | 0.24 (0.22, 0.26) | -0.41 (-0.41, -0.41) | <0.001            |                      |        |
| <b>21 GBD region</b>   |                   |                   |                    |        |                   |                   |                      |        |                      |                      |                      |                      |                      |                   |                      |                   |                      |        |
| South Asia             | 3.20 (3.15, 3.26) | 4.47 (4.42, 4.52) | 1.19 (1.09, 1.29)  | <0.001 | 0.35 (0.33, 0.37) | 0.46 (0.45, 0.48) | 0.99 (0.84, 1.14)    | <0.001 | 10.90 (10.80, 11.00) | 11.56 (11.49, 11.64) | 0.19 (-0.15, 0.53)   | 0.271                | 0.18 (0.17, 0.20)    | 0.20 (0.19, 0.21) | 0.28 (-0.40, 0.84)   | 0.421             |                      |        |

|                              |                   |        |         |        |                   |                   |       |        |                      |                      |       |        |                   |                   |       |        |
|------------------------------|-------------------|--------|---------|--------|-------------------|-------------------|-------|--------|----------------------|----------------------|-------|--------|-------------------|-------------------|-------|--------|
|                              |                   | 4.51)  | 1.28)   |        |                   |                   | 1.14) |        |                      |                      | 0.52) |        |                   |                   | 0.97) |        |
| East Asia                    | 7.58 (7.51, 7.65) | 5.38   | -1.14   | <0.001 | 0.86 (0.84, 0.89) | 0.80 (0.78, 0.83) | -0.23 | <0.001 | 8.11 (8.04, 8.19)    | 4.09 (4.04, 4.15)    | -2.31 | <0.001 | 0.13 (0.12, 0.14) | 0.07 (0.06, 0.08) | -1.93 | <0.001 |
|                              |                   | 5.44)  | -0.86)  |        |                   |                   |       |        |                      |                      |       |        |                   |                   |       |        |
| North Africa and Middle East | 5.64 (5.51, 5.77) | 7.06   | 0.79    | <0.001 | 0.92 (0.87, 0.97) | 1.04 (1.00, 1.08) | 0.41  | <0.001 | 11.14 (10.96, 11.33) | 8.74 (8.63, 8.85)    | -0.81 | <0.001 | 0.19 (0.16, 0.21) | 0.15 (0.13, 0.16) | -0.70 | 0.001  |
|                              |                   | 7.16)  | 0.84)   |        |                   |                   |       |        |                      |                      |       |        |                   |                   |       |        |
| Western Sub-Saharan Africa   | 3.79 (3.65, 3.94) | 4.25   | 0.46    | <0.001 | 0.79 (0.73, 0.86) | 0.88 (0.84, 0.93) | 0.38  | <0.001 | 17.99 (17.66, 18.32) | 12.44 (12.27, 12.61) | -1.25 | <0.001 | 0.31 (0.26, 0.35) | 0.21 (0.19, 0.23) | -1.33 | <0.001 |
|                              |                   | 4.15,  | (0.33,  |        |                   |                   |       |        |                      |                      |       |        |                   |                   |       |        |
| Southeast Asia               | 5.59 (5.48, 5.69) | 7.13   | 0.84    | <0.001 | 1.55 (1.49, 1.60) | 1.66 (1.61, 1.71) | 0.23  | <0.001 | 34.40 (34.13, 34.67) | 34.14 (33.92, 34.35) | -0.03 | 0.814  | 0.58 (0.55, 0.62) | 0.57 (0.55, 0.60) | -0.08 | 0.752  |
|                              |                   | (7.03, | (0.82,  |        |                   |                   |       |        |                      |                      |       |        |                   |                   |       |        |
| Eastern Sub-Saharan Africa   | 3.97 (3.82, 4.13) | 4.29   | 0.32    | <0.001 | 0.83 (0.77, 0.91) | 0.93 (0.88, 0.98) | 0.41  | <0.001 | 24.96 (24.57, 25.35) | 19.07 (18.85, 19.29) | -0.93 | <0.001 | 0.42 (0.37, 0.47) | 0.32 (0.29, 0.35) | -0.97 | <0.001 |
|                              |                   | (4.19, | (0.20,  |        |                   |                   |       |        |                      |                      |       |        |                   |                   |       |        |
| Central Latin America        | 4.64 (4.48, 4.82) | 6.53   | 1.18    | <0.001 | 0.64 (0.58, 0.70) | 0.84 (0.78, 0.89) | 0.94  | <0.001 | 9.11 (8.88, 9.35)    | 11.13 (10.92, 11.33) | 0.73  | <0.001 | 0.15 (0.12, 0.19) | 0.19 (0.16, 0.21) | 0.80  | 0.010  |
|                              |                   | (6.37, | (1.13,  |        |                   |                   |       |        |                      |                      |       |        |                   |                   |       |        |
| Tropical Latin America       | 4.82 (4.65, 5.00) | 7.29   | 1.42    | <0.001 | 0.71 (0.64, 0.77) | 0.98 (0.92, 1.05) | 1.11  | <0.001 | 23.89 (23.51, 24.27) | 20.99 (20.69, 21.29) | -0.44 | <0.001 | 0.40 (0.35, 0.45) | 0.35 (0.31, 0.39) | -0.42 | 0.011  |
|                              |                   | (7.12, | (1.34,  |        |                   |                   |       |        |                      |                      |       |        |                   |                   |       |        |
| Central Sub-Saharan Africa   | 3.11 (2.87, 3.37) | 3.64   | 0.59    | <0.001 | 0.71 (0.59, 0.84) | 0.77 (0.69, 0.85) | 0.30  | <0.001 | 17.54 (16.95, 18.15) | 15.22 (14.88, 15.58) | -0.53 | <0.001 | 0.30 (0.22, 0.39) | 0.26 (0.21, 0.31) | -0.51 | <0.001 |
|                              |                   | (3.48, | (0.47,  |        |                   |                   |       |        |                      |                      |       |        |                   |                   |       |        |
| Western Europe               | 6.47 (6.34, 6.60) | 7.01   | 0.27    | <0.001 | 1.20 (1.15, 1.26) | 1.07 (1.01, 1.12) | -0.42 | <0.001 | 5.23 (5.11, 5.34)    | 6.67 (6.53, 6.81)    | 0.80  | <0.001 | 0.09 (0.07, 0.10) | 0.11 (0.10, 0.13) | 0.72  | 0.046  |
|                              |                   | (6.87, | (0.22,  |        |                   |                   |       |        |                      |                      |       |        |                   |                   |       |        |
| High-income North America    | 6.26 (6.11, 6.41) | 5.67   | -0.34   | <0.001 | 3.09 (2.99, 3.19) | 3.01 (2.91, 3.11) | -0.05 | 0.623  | 7.24 (7.09, 7.40)    | 12.33 (12.13, 12.52) | 1.88  | <0.001 | 0.12 (0.10, 0.14) | 0.21 (0.19, 0.24) | 1.94  | <0.001 |
|                              |                   | (5.54, | (-0.39, |        |                   |                   |       |        |                      |                      |       |        |                   |                   |       |        |
| Central Asia                 | 3.13 (2.93, 3.35) | 3.85   | 0.73    | <0.001 | 0.30 (0.24, 0.37) | 0.35 (0.30, 0.42) | 0.56  | <0.001 | 5.30 (5.04, 5.58)    | 7.98 (7.70, 8.27)    | 1.42  | <0.001 | 0.09 (0.06, 0.13) | 0.13 (0.10, 0.18) | 1.02  | 0.013  |
|                              |                   | (3.65, | (0.67,  |        |                   |                   |       |        |                      |                      |       |        |                   |                   |       |        |



|                             |                   |                |                |        |                   |                   |                |        |  |                      |                      |       |              |                   |                   |                |              |
|-----------------------------|-------------------|----------------|----------------|--------|-------------------|-------------------|----------------|--------|--|----------------------|----------------------|-------|--------------|-------------------|-------------------|----------------|--------------|
|                             |                   | 4.05)          | 0.79)          |        |                   |                   | 0.74)          |        |  |                      | 1.75)                |       |              |                   | 1.84)             |                |              |
| Eastern Europe              | 5.62 (5.46, 5.78) | 11.48          | 2.50           |        |                   |                   | 1.98           |        |  | 14.85 (14.60, 15.11) | 42.86 (42.39, 43.33) | 3.79  |              | 0.25 (0.22, 0.28) | 0.74 (0.68, 0.80) | 3.91           |              |
|                             |                   | (11.23, 11.73) | (2.28, 2.73)   | <0.001 | 0.60 (0.55, 0.65) | 1.06 (0.98, 1.14) | (1.77, 2.19)   | <0.001 |  |                      |                      |       | (2.61, 4.99) | <0.001            |                   |                | (2.58, 5.25) |
| Southern Sub-Saharan Africa | 5.91 (5.58, 6.25) | 5.51           | -0.23          |        |                   |                   | -0.29          |        |  | 45.22 (44.29, 46.16) | 25.49 (24.95, 26.03) | -1.92 |              | 0.77 (0.65, 0.90) | 0.43 (0.36, 0.50) | -1.97          |              |
|                             |                   | (5.26, 5.76)   | (-0.32, -0.15) | <0.001 | 1.42 (1.27, 1.59) | 1.31 (1.19, 1.44) | (-0.41, -0.17) | <0.001 |  |                      |                      |       | 0.002        |                   |                   | (-3.12, -0.75) | 0.002        |
| High-income Asia Pacific    | 6.77 (6.57, 6.97) | 6.03           | -0.40          |        |                   |                   | -0.50          |        |  | 9.26 (9.03, 9.50)    | 4.78 (4.59, 4.96)    | -2.28 |              | 0.15 (0.12, 0.18) | 0.08 (0.06, 0.11) | -2.28          |              |
|                             |                   | (5.83, 6.25)   | (-0.44, -0.36) | <0.001 | 1.72 (1.62, 1.82) | 1.49 (1.39, 1.60) | (-0.54, -0.46) | <0.001 |  |                      |                      |       | <0.001       |                   |                   | (-2.67, -1.88) | <0.001       |
| Central Europe              | 4.84 (4.64, 5.04) | 5.89           | 0.68           |        |                   |                   | 0.48           |        |  | 7.13 (6.89, 7.38)    | 9.04 (8.74, 9.35)    | 0.81  |              | 0.12 (0.09, 0.16) | 0.15 (0.12, 0.20) | 0.74           |              |
|                             |                   | (5.64, 6.14)   | (0.52, 0.83)   | <0.001 | 0.61 (0.54, 0.68) | 0.70 (0.61, 0.79) | (0.34, 0.62)   | <0.001 |  |                      |                      |       | <0.001       |                   |                   | (0.25, 1.24)   | 0.003        |
| Andean Latin America        | 3.67 (3.37, 4.00) | 6.26           | 1.86           |        |                   |                   | 1.71           |        |  | 16.23 (15.59, 16.90) | 12.03 (11.61, 12.46) | -0.99 |              | 0.27 (0.19, 0.37) | 0.20 (0.15, 0.26) | -1.01          |              |
|                             |                   | (5.96, 6.58)   | (1.82, 1.91)   | <0.001 | 0.47 (0.37, 0.60) | 0.77 (0.67, 0.89) | (1.56, 1.86)   | <0.001 |  |                      |                      |       | <0.001       |                   |                   | (-1.74, -0.27) | 0.007        |
| Caribbean                   | 5.35 (4.98, 5.75) | 9.10           | 1.85           |        |                   |                   | 1.11           |        |  | 18.44 (17.74, 19.17) | 23.68 (22.98, 24.40) | 0.91  |              | 0.31 (0.22, 0.42) | 0.40 (0.31, 0.50) | 0.92           |              |
|                             |                   | (8.67, 9.55)   | (1.82, 1.89)   | <0.001 | 0.75 (0.61, 0.91) | 1.03 (0.89, 1.19) | (1.06, 1.16)   | <0.001 |  |                      |                      |       | <0.001       |                   |                   | (0.52, 1.31)   | <0.001       |
| Southern Latin America      | 4.07 (3.78, 4.36) | 7.61           | 2.18           |        |                   |                   | 1.17           |        |  | 11.29 (10.82, 11.78) | 14.63 (14.17, 15.11) | 0.92  |              | 0.19 (0.13, 0.27) | 0.25 (0.19, 0.32) | 1.04           |              |
|                             |                   | (7.27, 7.95)   | (2.09, 2.27)   | <0.001 | 0.83 (0.70, 0.96) | 1.16 (1.03, 1.30) | (1.10, 1.25)   | <0.001 |  |                      |                      |       | <0.001       |                   |                   | (0.75, 1.34)   | <0.001       |
| Oceania                     | 5.05 (4.21, 6.03) | 6.14           | 0.69           |        |                   |                   | 0.19           |        |  | 22.84 (20.98, 24.83) | 31.05 (29.56, 32.59) | 1.03  |              | 0.39 (0.18, 0.74) | 0.53 (0.35, 0.77) | 1.02           |              |
|                             |                   | (5.49, 6.85)   | (0.61, 0.77)   | <0.001 | 0.64 (0.37, 1.06) | 0.68 (0.48, 0.94) | (0.03, 0.34)   | 0.019  |  |                      |                      |       | <0.001       |                   |                   | (0.85, 1.20)   | <0.001       |
| Australasia                 | 5.76 (5.25, 6.30) | 6.41           | 0.37           |        |                   |                   | -0.55          |        |  | 5.93 (5.42, 6.48)    | 7.63 (7.10, 8.19)    | 0.96  |              | 0.10 (0.04, 0.19) | 0.13 (0.07, 0.22) | 0.99           |              |
|                             |                   | (5.92, 6.93)   | (0.29, 0.45)   | <0.001 | 1.27 (1.04, 1.54) | 1.08 (0.88, 1.31) | (-0.66, -0.44) | <0.001 |  |                      |                      |       | <0.001       |                   |                   | (-0.04, 2.03)  | 0.059        |
| <b>Women</b>                |                   |                |                |        |                   |                   |                |        |  |                      |                      |       |              |                   |                   |                |              |
| Global                      | 5.15 (5.11, 5.19) | 5.06           | -0.04          |        |                   |                   | -0.19          |        |  | 11.10 (11.04, 11.17) | 10.57 (10.51, 10.62) | -0.18 |              | 0.18 (0.18, 0.19) | 0.18 (0.17, 0.18) | -0.06          |              |
|                             |                   | (5.02, 5.10)   | (-0.09, 0.02)  | 0.167  | 1.01 (0.99, 1.03) | 0.95 (0.94, 0.97) | (-0.30, -0.08) | 0.001  |  |                      |                      |       | 0.013        |                   |                   | (-0.37, 0.26)  | 0.732        |

| SDI category                 |                   |      |       |        |                   |                   |       |        |                      |                      |       |        |                   |                   |       |        |
|------------------------------|-------------------|------|-------|--------|-------------------|-------------------|-------|--------|----------------------|----------------------|-------|--------|-------------------|-------------------|-------|--------|
|                              | 2010              | 2015 | 2020  | 2025   | 2030              | 2035              | 2040  | 2045   | 2050                 | 2055                 | 2060  | 2065   | 2070              | 2075              | 2080  | 2085   |
| High                         | 5.89 (5.78, 6.02) | 5.67 | -0.13 | <0.001 | 2.28 (2.21, 2.35) | 2.05 (1.98, 2.12) | -0.34 | <0.001 | 5.73 (5.61, 5.85)    | 6.87 (6.75, 7.00)    | 0.62  | <0.001 | 0.09 (0.08, 0.11) | 0.11 (0.10, 0.13) | 0.82  | 0.025  |
|                              |                   | 5.79 | -0.10 |        |                   |                   | -0.25 |        |                      |                      | 0.82  |        |                   |                   | 1.54  |        |
| High-middle                  | 6.03 (5.93, 6.13) | 6.05 | 0.01  | 0.822  | 0.90 (0.86, 0.94) | 0.99 (0.95, 1.03) | 0.35  | <0.001 | 8.35 (8.23, 8.46)    | 8.51 (8.40, 8.63)    | 0.05  | 0.830  | 0.14 (0.12, 0.15) | 0.14 (0.13, 0.16) | 0.21  | 0.585  |
|                              |                   | 6.14 | 0.08  |        |                   |                   | 0.41  |        |                      |                      | 0.53  |        |                   |                   | 0.96  |        |
| Middle                       | 5.70 (5.63, 5.78) | 5.41 | -0.17 | <0.001 | 0.95 (0.92, 0.98) | 0.97 (0.94, 1.00) | 0.07  | 0.199  | 13.41 (13.29, 13.53) | 11.59 (11.49, 11.69) | -0.49 | 0.010  | 0.22 (0.21, 0.24) | 0.19 (0.18, 0.21) | -0.51 | 0.096  |
|                              |                   | 5.47 | -0.13 |        |                   |                   | 0.17  |        |                      |                      | -0.12 |        |                   |                   | 0.09  |        |
| Low-middle                   | 3.55 (3.47, 3.63) | 4.36 | 0.73  | <0.001 | 0.48 (0.45, 0.51) | 0.60 (0.57, 0.62) | 0.77  | <0.001 | 12.95 (12.79, 13.10) | 12.02 (11.91, 12.14) | -0.22 | 0.156  | 0.21 (0.20, 0.24) | 0.20 (0.19, 0.22) | -0.16 | 0.288  |
|                              |                   | 4.43 | 0.84  |        |                   |                   | 0.86  |        |                      |                      | 0.08  |        |                   |                   | 0.13  |        |
| Low                          | 3.05 (2.94, 3.17) | 3.72 | 0.76  | <0.001 | 0.54 (0.49, 0.59) | 0.64 (0.61, 0.67) | 0.61  | <0.001 | 14.77 (14.52, 15.02) | 11.16 (11.02, 11.30) | -0.97 | <0.001 | 0.25 (0.22, 0.28) | 0.19 (0.17, 0.21) | -0.95 | <0.001 |
|                              |                   | 3.80 | 0.86  |        |                   |                   | 0.76  |        |                      |                      | -0.84 |        |                   |                   | -0.49 |        |
| 21 GBD region                |                   |      |       |        |                   |                   |       |        |                      |                      |       |        |                   |                   |       |        |
| South Asia                   | 2.90 (2.83, 2.98) | 4.07 | 1.20  | <0.001 | 0.34 (0.31, 0.36) | 0.44 (0.42, 0.46) | 0.98  | <0.001 | 10.18 (10.05, 10.32) | 10.15 (10.04, 10.25) | -0.06 | 0.821  | 0.17 (0.15, 0.19) | 0.17 (0.16, 0.18) | -0.08 | 0.855  |
|                              |                   | 4.13 | 1.29  |        |                   |                   | 1.18  |        |                      |                      | 0.45  |        |                   |                   | 0.75  |        |
| East Asia                    | 7.42 (7.32, 7.53) | 4.93 | -1.36 | <0.001 | 0.84 (0.81, 0.88) | 0.75 (0.71, 0.78) | -0.37 | <0.001 | 5.39 (5.30, 5.48)    | 2.19 (2.13, 2.25)    | -3.25 | <0.001 | 0.09 (0.08, 0.10) | 0.04 (0.03, 0.04) | -2.72 | <0.001 |
|                              |                   | 5.02 | -1.03 |        |                   |                   | -0.26 |        |                      |                      | -2.43 |        |                   |                   | -1.71 |        |
| North Africa and Middle East | 4.32 (4.16, 4.49) | 5.58 | 0.88  | <0.001 | 0.76 (0.69, 0.83) | 0.84 (0.79, 0.89) | 0.31  | <0.001 | 8.30 (8.07, 8.53)    | 6.45 (6.31, 6.59)    | -0.85 | <0.001 | 0.14 (0.11, 0.17) | 0.11 (0.09, 0.13) | -0.89 | 0.001  |
|                              |                   | 5.71 | 0.92  |        |                   |                   | 0.40  |        |                      |                      | -0.73 |        |                   |                   | -0.34 |        |
| Western Sub-Saharan Africa   | 3.40 (3.21, 3.60) | 3.71 | 0.36  | <0.001 | 0.84 (0.74, 0.94) | 0.93 (0.87, 1.00) | 0.42  | <0.001 | 18.52 (18.06, 19.00) | 10.29 (10.07, 10.51) | -2.01 | <0.001 | 0.32 (0.26, 0.39) | 0.17 (0.15, 0.20) | -2.11 | <0.001 |
|                              |                   | 3.84 | 0.48  |        |                   |                   | 0.50  |        |                      |                      | -1.88 |        |                   |                   | -1.66 |        |
| Southeast Asia               | 5.34 (5.20, 5.49) | 6.87 | 0.86  | <0.001 | 1.68 (1.60, 1.76) | 1.74 (1.67, 1.82) | 0.11  | <0.001 | 31.50 (31.15, 31.86) | 28.88 (28.59, 29.17) | -0.30 | 0.128  | 0.53 (0.48, 0.58) | 0.48 (0.45, 0.52) | -0.34 | 0.134  |
|                              |                   | 7.01 | 0.89  |        |                   |                   | 0.17  |        |                      |                      | 0.09  |        |                   |                   | 0.10  |        |

|                  |             |        |         |        |             |             |         |        |               |               |         |        |             |             |         |        |
|------------------|-------------|--------|---------|--------|-------------|-------------|---------|--------|---------------|---------------|---------|--------|-------------|-------------|---------|--------|
| Eastern          |             | 3.44   | 0.25    |        |             |             |         |        |               |               |         |        |             |             |         |        |
| Sub-Saharan      | 3.25 (3.06, | (3.31, | (0.13,  | <0.001 | 0.79 (0.70, | 0.88 (0.82, | 0.36    |        | 21.82 (21.32, | 13.83 (13.57, | -1.56   |        | 0.37 (0.30, | 0.23 (0.20, | -1.63   |        |
| Africa           | 3.45)       | 3.57)  | 0.36)   |        | 0.89)       | 0.95)       | (0.20,  | <0.001 | 22.33)        | 14.09)        | (-1.75, | <0.001 | 0.44)       | 0.27)       | (-2.04, | <0.001 |
|                  |             |        |         |        |             |             | 0.51)   |        |               |               | -1.36)  |        | 0.44)       | 0.27)       | -1.22)  |        |
| Central Latin    | 4.56 (4.33, | 5.64   | 0.74    |        | 0.71 (0.62, | 0.83 (0.76, | 0.54    |        | 7.55 (7.26,   | 8.89 (8.63,   | 0.63    |        | 0.12 (0.09, | 0.15 (0.12, | 0.82    |        |
| America          | 4.80)       | (5.43, | (0.63,  | <0.001 | 0.81)       | 0.92)       | (0.46,  | <0.001 | 7.86)         | 9.15)         | (0.07,  | 0.028  | 0.17)       | 0.18)       | (0.47,  | <0.001 |
|                  |             | 5.84)  | 0.86)   |        |             |             | 0.63)   |        |               |               | 1.20)   |        | 0.17)       | 0.18)       | 1.16)   |        |
| Tropical Latin   | 4.39 (4.16, | 6.39   | 1.29    |        | 0.77 (0.68, | 1.02 (0.93, | 0.96    |        | 20.19 (19.70, | 18.15 (17.76, | -0.32   |        | 0.33 (0.27, | 0.30 (0.25, | -0.37   |        |
| America          | 4.63)       | (6.17, | (1.22,  | <0.001 | 0.87)       | 1.12)       | (0.79,  | <0.001 | 20.69)        | 18.55)        | (-0.62, | 0.039  | 0.41)       | 0.36)       | (-0.60, | 0.002  |
|                  |             | 6.63)  | 1.36)   |        |             |             | 1.12)   |        |               |               | -0.02)  |        | 0.41)       | 0.36)       | -0.14)  |        |
| Central          |             | 3.14   | 0.60    |        |             |             | 0.22    |        |               |               | -0.80   |        | 0.25 (0.16, | 0.20 (0.15, | -0.77   |        |
| Sub-Saharan      | 2.67 (2.36, | (2.92, | (0.49,  | <0.001 | 0.74 (0.58, | 0.79 (0.69, | (0.07,  | 0.005  | 14.79 (14.04, | 11.86 (11.43, | (-1.00, | <0.001 | 0.37)       | 0.26)       | (-1.15, | <0.001 |
| Africa           | 3.01)       | 3.36)  | 0.72)   |        | 0.93)       | 0.91)       | 0.37)   |        | 15.58)        | 12.31)        | -0.59)  |        | 0.37)       | 0.26)       | -0.39)  |        |
|                  |             |        |         |        |             |             |         |        |               |               | 0.60    |        | 0.06 (0.04, | 0.07 (0.05, | 0.53    |        |
| Western Europe   | 5.97 (5.79, | 6.27   | 0.16    |        | 1.25 (1.17, | 1.05 (0.97, | -0.65   |        | 3.66 (3.52,   | 4.35 (4.19,   | 0.74)   | <0.001 | 0.08)       | 0.10)       | (-0.19, | 0.149  |
|                  | 6.15)       | 6.46)  | 0.22)   | <0.001 | 1.34)       | 1.13)       | (-0.82, | <0.001 | 3.80)         | 4.51)         | 0.45,   | <0.001 | 0.08)       | 0.10)       | 1.26)   |        |
|                  |             |        |         |        |             |             | -0.48)  |        |               |               | 0.74)   |        | 0.08)       | 0.10)       | 1.26)   |        |
| High-income      | 6.07 (5.87, | 5.10   | -0.59   |        | 3.75 (3.60, | 3.49 (3.34, | -0.21   |        | 5.21 (5.03,   | 10.36 (10.11, | 2.48    |        | 0.08 (0.06, | 0.17 (0.14, | 2.73    |        |
| North America    | 6.28)       | (4.92, | (-0.64, | <0.001 | 3.92)       | 3.64)       | (-0.35, | 0.002  | 5.40)         | 10.62)        | (2.09,  | <0.001 | 0.11)       | 0.21)       | (1.80,  | <0.001 |
|                  |             | 5.28)  | -0.54)  |        |             |             | -0.08)  |        |               |               | 2.88)   |        | 0.11)       | 0.21)       | 3.67)   |        |
|                  |             |        |         |        |             |             |         |        |               |               | 1.49    |        | 0.06 (0.03, | 0.09 (0.05, | 1.27    |        |
| Central Asia     | 2.57 (2.31, | 3.21   | 0.78    |        | 0.25 (0.17, | 0.29 (0.22, | 0.64    |        | 3.51 (3.21,   | 5.50 (5.17,   | 1.84)   | <0.001 | 0.12)       | 0.15)       | (0.92,  | <0.001 |
|                  | 2.85)       | (2.96, | (0.73,  | <0.001 | 0.34)       | 0.38)       | (0.46,  | <0.001 | 3.83)         | 5.84)         | (1.14,  | <0.001 | 0.12)       | 0.15)       | 1.62)   |        |
|                  |             | 3.48)  | 0.84)   |        |             |             | 0.82)   |        |               |               | 1.84)   |        | 0.12)       | 0.15)       | 1.62)   |        |
| Eastern Europe   | 5.01 (4.80, | 9.28   | 2.13    |        | 0.56 (0.49, | 0.91 (0.81, | 1.68    |        | 7.58 (7.32,   | 20.45 (19.97, | 3.54    |        | 0.12 (0.09, | 0.34 (0.28, | 3.69    |        |
|                  | 5.23)       | (8.96, | (1.92,  | <0.001 | 0.64)       | 1.02)       | (1.51,  | <0.001 | 7.85)         | 20.94)        | (2.51,  | <0.001 | 0.16)       | 0.41)       | (2.93,  | <0.001 |
|                  |             | 9.61)  | 2.35)   |        |             |             | 1.84)   |        |               |               | 4.59)   |        | 0.16)       | 0.41)       | 4.47)   |        |
| Southern         |             | 5.02   | -0.62   |        |             |             | -0.40   |        |               |               | -3.08   |        | 0.88 (0.71, | 0.34 (0.26, | -3.12   |        |
| Sub-Saharan      | 6.00 (5.55, | (4.69, | (-0.80, | <0.001 | 1.58 (1.35, | 1.40 (1.22, | (-0.52, | <0.001 | 51.96 (50.59, | 20.33 (19.66, | (-4.67, | <0.001 | 1.08)       | 0.44)       | (-4.81, | <0.001 |
| Africa           | 6.48)       | 5.37)  | -0.43)  |        | 1.83)       | 1.59)       | -0.28)  |        | 53.36)        | 21.01)        | -1.46)  |        | 1.08)       | 0.44)       | -1.41)  |        |
|                  |             |        |         |        |             |             |         |        |               |               |         |        | 0.14 (0.10, | 0.06 (0.03, | -3.06   |        |
| High-income Asia | 5.92 (5.66, | 5.18   | -0.46   |        | 1.85 (1.71, | 1.56 (1.40, | -0.60   |        | 8.77 (8.45,   | 3.60 (3.37,   | -3.08   |        | 0.14 (0.10, | 0.06 (0.03, | (-3.63, | <0.001 |
| Pacific          | 6.18)       | (4.90, | (-0.49, | <0.001 | 2.00)       | 1.72)       | (-0.69, | <0.001 | 9.10)         | 3.84)         | (-3.57, | <0.001 | 0.19)       | 0.10)       | -2.48)  |        |
|                  |             | 5.47)  | -0.43)  |        |             |             | -0.51)  |        |               |               | -2.58)  |        | 0.19)       | 0.10)       | -2.48)  |        |
|                  |             |        |         |        |             |             |         |        |               |               | 0.50    |        | 0.07 (0.04, | 0.08 (0.05, | 0.49    |        |
| Central Europe   | 4.47 (4.20, | 5.15   | 0.49    |        | 0.56 (0.47, | 0.61 (0.50, | 0.29    |        | 4.37 (4.10,   | 5.05 (4.72,   | 0.71)   | <0.001 | 0.12)       | 0.14)       | (-0.04, | 0.069  |
|                  | 4.75)       | (4.82, | (0.44,  | <0.001 | 0.67)       | 0.74)       | (0.11,  | 0.002  | 4.65)         | 5.39)         | (0.30,  | <0.001 | 0.12)       | 0.14)       | 1.01)   |        |
|                  |             | 5.50)  | 0.53)   |        |             |             | 0.47)   |        |               |               | 0.71)   |        | 0.12)       | 0.14)       | 1.01)   |        |

|                        | Mean              | SD                | CI                | CI     | CI                | CI                | CI                   | CI     | CI                   | CI                   | CI                   | CI     | CI                | CI                | CI                   |        |
|------------------------|-------------------|-------------------|-------------------|--------|-------------------|-------------------|----------------------|--------|----------------------|----------------------|----------------------|--------|-------------------|-------------------|----------------------|--------|
|                        | 95% CI            | 95% CI            | 95% CI            | 95% CI | 95% CI            | 95% CI            | 95% CI               | 95% CI | 95% CI               | 95% CI               | 95% CI               | 95% CI | 95% CI            | 95% CI            | 95% CI               |        |
| Andean Latin America   | 3.26 (2.86, 3.70) | 5.73 (5.33, 6.16) | 1.97 (1.94, 2.00) | <0.001 | 0.45 (0.31, 0.63) | 0.76 (0.62, 0.93) | 1.81 (1.78, 1.84)    | <0.001 | 15.07 (14.20, 15.98) | 9.83 (9.29, 10.39)   | -1.44 (-2.40, -0.47) | 0.004  | 0.25 (0.15, 0.40) | 0.16 (0.10, 0.25) | -1.46 (-2.06, -0.85) | <0.001 |
| Caribbean              | 4.94 (4.45, 5.49) | 8.60 (8.01, 9.22) | 1.94 (1.86, 2.02) | <0.001 | 0.76 (0.58, 0.99) | 1.02 (0.82, 1.25) | 1.03 (0.95, 1.11)    | <0.001 | 17.62 (16.67, 18.62) | 22.99 (22.02, 23.99) | 0.96 (0.67, 1.25)    | <0.001 | 0.29 (0.18, 0.45) | 0.38 (0.27, 0.53) | 0.94 (0.51, 1.37)    | <0.001 |
| Southern Latin America | 3.82 (3.44, 4.23) | 7.00 (6.55, 7.48) | 2.13 (2.07, 2.19) | <0.001 | 0.89 (0.71, 1.10) | 1.19 (1.01, 1.39) | 1.00 (0.89, 1.10)    | <0.001 | 9.72 (9.10, 10.37)   | 10.68 (10.13, 11.26) | 0.37 (0.21, 0.53)    | <0.001 | 0.16 (0.09, 0.27) | 0.18 (0.11, 0.27) | 0.39 (-0.28, 1.05)   | 0.254  |
| Oceania                | 5.76 (4.49, 7.30) | 7.12 (6.13, 8.22) | 0.75 (0.67, 0.82) | <0.001 | 0.76 (0.35, 1.48) | 0.80 (0.49, 1.22) | 0.16 (0.07, 0.26)    | <0.001 | 25.91 (23.08, 29.01) | 35.79 (33.53, 38.17) | 1.08 (0.94, 1.22)    | <0.001 | 0.44 (0.15, 1.05) | 0.61 (0.35, 1.00) | 1.09 (0.96, 1.23)    | <0.001 |
| Australasia            | 5.48 (4.79, 6.24) | 6.07 (5.40, 6.80) | 0.35 (0.26, 0.43) | <0.001 | 1.45 (1.10, 1.87) | 1.18 (0.90, 1.53) | -0.71 (-0.81, -0.62) | <0.001 | 4.63 (3.99, 5.34)    | 5.77 (5.13, 6.48)    | 0.87 (0.36, 1.39)    | 0.001  | 0.08 (0.02, 0.22) | 0.10 (0.03, 0.24) | 0.87 (-0.13, 1.89)   | 0.089  |
| <b>Men</b>             |                   |                   |                   |        |                   |                   |                      |        |                      |                      |                      |        |                   |                   |                      |        |
| Global                 | 5.90 (5.85, 5.94) | 6.38 (6.34, 6.42) | 0.28 (0.21, 0.35) | <0.001 | 0.92 (0.90, 0.94) | 0.97 (0.95, 0.98) | 0.19 (0.09, 0.28)    | <0.001 | 15.06 (14.98, 15.13) | 16.38 (16.31, 16.44) | 0.30 (0.00, 0.59)    | 0.050  | 0.25 (0.24, 0.26) | 0.28 (0.27, 0.29) | 0.31 (0.11, 0.50)    | 0.002  |
| <b>SDI category</b>    |                   |                   |                   |        |                   |                   |                      |        |                      |                      |                      |        |                   |                   |                      |        |
| High                   | 6.79 (6.66, 6.91) | 7.15 (7.02, 7.27) | 0.18 (0.13, 0.23) | <0.001 | 1.69 (1.63, 1.76) | 1.69 (1.63, 1.75) | 0.00 (-0.10, 0.11)   | 0.935  | 9.19 (9.05, 9.34)    | 10.86 (10.71, 11.01) | 0.59 (0.38, 0.79)    | <0.001 | 0.16 (0.14, 0.18) | 0.19 (0.17, 0.21) | 0.53 (-0.06, 1.12)   | 0.080  |
| High-middle            | 7.08 (6.97, 7.18) | 7.87 (7.76, 7.97) | 0.36 (0.27, 0.45) | <0.001 | 0.93 (0.90, 0.97) | 1.10 (1.06, 1.14) | 0.58 (0.52, 0.64)    | <0.001 | 16.59 (16.43, 16.75) | 19.23 (19.06, 19.39) | 0.54 (-0.08, 1.15)   | 0.087  | 0.28 (0.26, 0.30) | 0.33 (0.31, 0.35) | 0.65 (0.42, 0.88)    | <0.001 |
| Middle                 | 6.17 (6.09, 6.25) | 6.51 (6.44, 6.58) | 0.19 (0.13, 0.26) | <0.001 | 0.88 (0.85, 0.91) | 0.99 (0.96, 1.02) | 0.40 (0.30, 0.49)    | <0.001 | 16.53 (16.40, 16.66) | 16.82 (16.70, 16.93) | 0.06 (-0.13, 0.25)   | 0.527  | 0.28 (0.26, 0.30) | 0.28 (0.27, 0.30) | -0.01 (-0.40, 0.39)  | 0.966  |
| Low-middle             | 4.16 (4.08, 4.25) | 5.32 (5.25, 5.40) | 0.87 (0.82, 0.92) | <0.001 | 0.50 (0.47, 0.53) | 0.63 (0.61, 0.66) | 0.83 (0.71, 0.95)    | <0.001 | 14.27 (14.10, 14.43) | 15.43 (15.30, 15.56) | 0.28 (0.03, 0.52)    | 0.027  | 0.24 (0.22, 0.26) | 0.26 (0.25, 0.28) | 0.34 (-0.07, 0.76)   | 0.103  |
| Low                    | 4.01 (3.88, 4.25) | 4.98 (4.98, 4.98) | 0.79 (0.79, 0.79) | <0.001 | 0.57 (0.52, 0.62) | 0.69 (0.66, 0.72) | 0.72 (0.72, 0.72)    | <0.001 | 17.82 (17.54, 18.10) | 17.35 (17.17, 17.53) | -0.11 (-0.11, -0.11) | 0.287  | 0.30 (0.27, 0.33) | 0.29 (0.27, 0.31) | -0.20 (-0.20, -0.20) | 0.101  |

|                              |                   |                   |                      |        |                   |                   |                      |        |                      |                      |                      |        |                   |                   |                |
|------------------------------|-------------------|-------------------|----------------------|--------|-------------------|-------------------|----------------------|--------|----------------------|----------------------|----------------------|--------|-------------------|-------------------|----------------|
|                              | 4.14)             | (4.89, 5.08)      | (0.69, 0.90)         |        | 0.62)             | 0.73)             | (0.59, 0.85)         |        | 18.10)               | 17.54)               | (-0.31, 0.09)        | 0.34)  | 0.32)             | (-0.43, 0.04)     |                |
| <b>21 GBD region</b>         |                   |                   |                      |        |                   |                   |                      |        |                      |                      |                      |        |                   |                   |                |
|                              | 3.48 (3.40, 3.56) | 4.85 (4.78, 4.92) | 1.16 (1.06, 1.26)    | <0.001 | 0.36 (0.34, 0.39) | 0.48 (0.46, 0.51) | 1.05 (0.91, 1.18)    | <0.001 | 11.56 (11.42, 11.71) | 12.94 (12.83, 13.06) | 0.42 (0.04, 0.81)    | 0.031  | 0.20 (0.18, 0.22) | 0.22 (0.21, 0.24) | (-0.07, 0.09)  |
| South Asia                   |                   |                   |                      |        |                   |                   |                      |        |                      |                      |                      |        |                   |                   |                |
|                              | 7.73 (7.63, 7.83) | 5.81 (5.72, 5.91) | -0.94 (-1.18, -0.71) | <0.001 | 0.88 (0.85, 0.92) | 0.86 (0.82, 0.89) | -0.06 (-0.22, 0.09)  | 0.426  | 10.68 (10.56, 10.80) | 5.90 (5.81, 5.99)    | -2.01 (-2.43, -1.59) | <0.001 | 0.18 (0.16, 0.19) | 0.10 (0.09, 0.11) | (-1.88, -2.96) |
| East Asia                    |                   |                   |                      |        |                   |                   |                      |        |                      |                      |                      |        |                   |                   | 0.001          |
|                              | 6.89 (6.69, 7.09) | 8.41 (8.26, 8.56) | 0.70 (0.64, 0.76)    | <0.001 | 1.07 (0.99, 1.15) | 1.21 (1.15, 1.27) | 0.42 (0.38, 0.47)    | <0.001 | 13.84 (13.55, 14.13) | 10.83 (10.65, 11.00) | -0.82 (-0.96, -0.69) | <0.001 | 0.23 (0.20, 0.27) | 0.18 (0.16, 0.20) | (-1.20, -0.48) |
| North Africa and Middle East |                   |                   |                      |        |                   |                   |                      |        |                      |                      |                      |        |                   |                   | <0.001         |
|                              | 4.22 (4.00, 4.45) | 4.84 (4.69, 4.99) | 0.53 (0.40, 0.66)    | <0.001 | 0.74 (0.65, 0.84) | 0.83 (0.77, 0.89) | 0.42 (0.33, 0.52)    | <0.001 | 17.43 (16.97, 17.90) | 14.82 (14.55, 15.10) | -0.55 (-0.67, -0.43) | <0.001 | 0.30 (0.24, 0.36) | 0.25 (0.22, 0.29) | (-0.83, -0.45) |
| Western Sub-Saharan Africa   |                   |                   |                      |        |                   |                   |                      |        |                      |                      |                      |        |                   |                   | <0.001         |
|                              | 5.84 (5.68, 5.99) | 7.38 (7.24, 7.53) | 0.82 (0.79, 0.84)    | <0.001 | 1.41 (1.33, 1.49) | 1.58 (1.51, 1.65) | 0.41 (0.33, 0.49)    | <0.001 | 37.39 (36.99, 37.79) | 39.30 (38.98, 39.64) | 0.25 (-0.14, 0.64)   | 0.218  | 0.63 (0.58, 0.69) | 0.66 (0.62, 0.71) | (-0.04, 0.087) |
| Southeast Asia               |                   |                   |                      |        |                   |                   |                      |        |                      |                      |                      |        |                   |                   |                |
|                              | 4.75 (4.52, 5.00) | 5.20 (5.04, 5.36) | 0.33 (0.27, 0.39)    | <0.001 | 0.88 (0.78, 0.99) | 0.98 (0.91, 1.06) | 0.42 (0.32, 0.51)    | <0.001 | 28.34 (27.74, 28.95) | 24.65 (24.29, 25.01) | -0.48 (-0.71, -0.25) | <0.001 | 0.48 (0.40, 0.57) | 0.42 (0.37, 0.47) | (-0.74, -0.26) |
| Eastern Sub-Saharan Africa   |                   |                   |                      |        |                   |                   |                      |        |                      |                      |                      |        |                   |                   | <0.001         |
|                              | 4.73 (4.49, 4.98) | 7.47 (7.23, 7.72) | 1.57 (1.50, 1.64)    | <0.001 | 0.56 (0.48, 0.65) | 0.84 (0.76, 0.92) | 1.40 (1.24, 1.57)    | <0.001 | 10.77 (10.41, 11.15) | 13.48 (13.16, 13.81) | 0.86 (0.36, 1.35)    | 0.001  | 0.18 (0.14, 0.24) | 0.23 (0.19, 0.27) | (0.79, <0.001) |
| Central Latin America        |                   |                   |                      |        |                   |                   |                      |        |                      |                      |                      |        |                   |                   |                |
|                              | 5.27 (5.02, 5.54) | 8.21 (7.95, 8.48) | 1.51 (1.48, 1.55)    | <0.001 | 0.64 (0.55, 0.73) | 0.95 (0.86, 1.05) | 1.36 (1.22, 1.51)    | <0.001 | 27.72 (27.13, 28.31) | 23.87 (23.42, 24.32) | -0.50 (-0.69, -0.31) | <0.001 | 0.46 (0.39, 0.54) | 0.40 (0.34, 0.46) | (-0.84, 0.012) |
| Tropical Latin America       |                   |                   |                      |        |                   |                   |                      |        |                      |                      |                      |        |                   |                   |                |
|                              | 3.56 (3.19, 3.96) | 4.16 (3.91, 4.43) | 0.59 (0.47, 0.71)    | <0.001 | 0.68 (0.52, 0.86) | 0.74 (0.64, 0.86) | 0.37 (0.31, 0.42)    | <0.001 | 20.36 (19.45, 21.31) | 18.65 (18.10, 19.22) | -0.37 (-0.50, -0.24) | <0.001 | 0.34 (0.23, 0.49) | 0.32 (0.25, 0.40) | (-0.43, -0.20) |
| Central Sub-Saharan Africa   |                   |                   |                      |        |                   |                   |                      |        |                      |                      |                      |        |                   |                   | <0.001         |
|                              | 6.96 (6.77, 7.15) | 7.73 (7.52, 7.94) | 0.35 (0.28, 0.43)    | <0.001 | 1.16 (1.08, 1.24) | 1.09 (1.01, 1.17) | -0.22 (-0.34, -0.10) | <0.001 | 6.77 (6.58, 6.96)    | 8.93 (8.71, 9.15)    | 0.90 (0.71, 1.08)    | <0.001 | 0.11 (0.09, 0.14) | 0.15 (0.12, 0.18) | (0.36, 1.27)   |
| Western Europe               |                   |                   |                      |        |                   |                   |                      |        |                      |                      |                      |        |                   |                   | <0.001         |



| Other cardiovascular and circulatory diseases |  |  |  |  |               |          |         |        |               |               |         |        |             |             |         |        |
|-----------------------------------------------|--|--|--|--|---------------|----------|---------|--------|---------------|---------------|---------|--------|-------------|-------------|---------|--------|
| Overall                                       |  |  |  |  |               |          |         |        |               |               |         |        |             |             |         |        |
|                                               |  |  |  |  | 232.41        | 282.72   | 0.68    |        |               |               | -0.08   |        |             |             |         |        |
|                                               |  |  |  |  | (232.21,      | (282.53, | (0.66,  | <0.001 | 54.33 (54.23, | 52.86 (52.78, | (-0.19, | 0.181  | 0.70 (0.69, | 0.63 (0.62, | (-0.52, | <0.001 |
|                                               |  |  |  |  | 232.61)       | 282.91)  | 0.70)   |        | 54.43)        | 52.94)        | 0.04)   |        | 0.72)       | 0.64)       | (-0.23) |        |
| SDI category                                  |  |  |  |  |               |          |         |        |               |               |         |        |             |             |         |        |
|                                               |  |  |  |  | 377.89        | 318.09   | -0.58   |        |               |               | -0.55   |        |             |             |         |        |
|                                               |  |  |  |  | (377.23,      | (317.48, | (-0.59, | <0.001 | 52.72 (52.47, | 44.80 (44.57, | (-0.69, | <0.001 | 0.55 (0.53, | 0.48 (0.45, | (-0.76, | 0.001  |
|                                               |  |  |  |  | 378.56)       | 318.69)  | -0.56)  |        | 52.97)        | 45.02)        | -0.41)  |        | 0.58)       | 0.50)       | (-0.21) |        |
|                                               |  |  |  |  | 176.12        | 212.31   | 0.64    |        |               |               | -0.58   |        |             |             |         |        |
|                                               |  |  |  |  | (175.74,      | (211.90, | (0.62,  | <0.001 | 45.30 (45.11, | 38.33 (38.16, | (-0.90, | <0.001 | 0.60 (0.58, | 0.45 (0.44, | (-1.37, | <0.001 |
|                                               |  |  |  |  | 176.49)       | 212.73)  | 0.67)   |        | 45.49)        | 38.50)        | -0.27)  |        | 0.63)       | 0.47)       | (-0.56) |        |
|                                               |  |  |  |  | 180.21        | 249.94   | 1.14    |        |               |               | -0.09   |        |             |             |         |        |
|                                               |  |  |  |  | (179.90,      | (249.61, | (1.10,  | <0.001 | 45.57 (45.41, | 44.17 (44.03, | (-0.18, | 0.039  | 0.60 (0.58, | 0.51 (0.50, | (-0.76, | <0.001 |
|                                               |  |  |  |  | 180.51)       | 250.26)  | 1.19)   |        | 45.73)        | 44.30)        | -0.01)  |        | 0.62)       | 0.53)       | (-0.35) |        |
|                                               |  |  |  |  | 198.86        | 251.24   | 0.81    |        |               |               | -0.11   |        |             |             |         |        |
|                                               |  |  |  |  | (198.45,      | (250.87, | (0.80,  | <0.001 | 62.39 (62.16, | 60.32 (60.14, | (-0.28, | 0.195  | 0.87 (0.84, | 0.79 (0.77, | (-0.51, | 0.001  |
|                                               |  |  |  |  | 199.27)       | 251.60)  | 0.82)   |        | 62.63)        | 60.50)        | 0.06)   |        | 0.90)       | 0.81)       | (-0.12) |        |
|                                               |  |  |  |  | 378.60        | 438.79   | 0.51    |        |               |               | -0.48   |        |             |             |         |        |
|                                               |  |  |  |  | (377.73,      | (438.18, | (0.50,  | <0.001 | 94.94 (94.49, | 82.60 (82.32, | (-0.55, | <0.001 | 1.26 (1.21, | 0.99 (0.96, | (-0.90, | <0.001 |
|                                               |  |  |  |  | 379.46)       | 439.41)  | 0.52)   |        | 95.39)        | 82.87)        | -0.40)  |        | 1.32)       | 1.03)       | (-0.79) |        |
| 21 GBD region                                 |  |  |  |  |               |          |         |        |               |               |         |        |             |             |         |        |
|                                               |  |  |  |  | 148.83        | 141.65   | -0.18   |        |               |               | -0.42   |        |             |             |         |        |
|                                               |  |  |  |  | (148.46,      | (141.38, | (-0.20, | <0.001 | 57.88 (57.65, | 51.16 (51.00, | (-0.70, | 0.003  | 0.84 (0.81, | 0.74 (0.72, | (-0.83, | 0.012  |
|                                               |  |  |  |  | 149.19)       | 141.91)  | -0.16)  |        | 58.11)        | 51.32)        | -0.15)  |        | 0.87)       | 0.76)       | (-0.10) |        |
|                                               |  |  |  |  | 61.81 (61.61, | 93.38    | 1.39    |        |               |               | -1.07   |        |             |             |         |        |
|                                               |  |  |  |  | 62.02)        | (93.11,  | (1.23,  | <0.001 | 21.95 (21.83, | 15.92 (15.81, | (-1.34, | <0.001 | 0.31 (0.29, | 0.18 (0.17, | (-2.26, | <0.001 |
|                                               |  |  |  |  |               | 93.65)   | 1.56)   |        | 22.08)        | 16.03)        | -0.81)  |        | 0.32)       | 0.19)       | (-1.30) |        |
|                                               |  |  |  |  | 478.25        | 492.43   | 0.11    |        |               |               | -0.57   |        |             |             |         |        |
|                                               |  |  |  |  | (477.07,      | (491.57, | (0.06,  | <0.001 | 97.26 (96.72, | 82.21 (81.86, | (-0.68, | <0.001 | 1.20 (1.14, | 0.93 (0.89, | (-0.86, | <0.001 |
|                                               |  |  |  |  |               |          |         |        | 97.80)        | 82.56)        |         |        | 1.26)       | 0.96)       | (-0.99, |        |
|                                               |  |  |  |  |               |          |         | 79     |               |               |         |        |             |             |         |        |

|                |   |   |   |   | 479.43)       | 493.29)  | 0.15)   |        |               |               |         |        | -0.46)      |             |         | -0.74) |
|----------------|---|---|---|---|---------------|----------|---------|--------|---------------|---------------|---------|--------|-------------|-------------|---------|--------|
| Western        |   |   |   |   | 786.44        | 893.23   | 0.45    |        | 139.58        | 113.13        | -0.73   |        | 1.64 (1.54, | 1.09 (1.04, | -1.42   |        |
| Sub-Saharan    | — | — | — | — | (784.39,      | (891.85, | (0.42,  | <0.001 | (138.69,      | (112.62,      | (-0.79, | <0.001 | 1.74)       | 1.14)       | (-1.52, | <0.001 |
| Africa         |   |   |   |   | 788.49)       | 894.61)  | 0.48)   |        | 140.48)       | 113.63)       | -0.68)  |        |             |             | -1.31)  |        |
|                |   |   |   |   | 174.26        | 185.40   | 0.21    |        |               |               | -0.65   |        |             |             | -0.89   |        |
| Southeast Asia | — | — | — | — | (173.68,      | (184.88, | (0.19,  | <0.001 | 50.37 (50.05, | 41.64 (41.39, | (-0.76, | <0.001 | 0.69 (0.65, | 0.53 (0.50, | (-1.05, | <0.001 |
|                |   |   |   |   | 174.84)       | 185.91)  | 0.23)   |        | 50.69)        | 41.88)        | -0.53)  |        | 0.73)       | 0.56)       | (-0.74) |        |
| Eastern        |   |   |   |   | 476.98        | 542.86   | 0.44    |        | 112.08        |               | -0.77   |        | 1.46 (1.36, | 1.01 (0.96, | -1.26   |        |
| Sub-Saharan    | — | — | — | — | (475.35,      | (541.73, | (0.42,  | <0.001 | (111.26,      | 89.75 (89.29, | (-0.85, | <0.001 | 1.56)       | 1.07)       | (-1.40, | <0.001 |
| Africa         |   |   |   |   | 478.62)       | 543.99)  | 0.47)   |        | 112.90)       | 90.23)        | -0.68)  |        |             |             | -1.13)  |        |
|                |   |   |   |   | 254.17        | 302.98   | 0.60    |        |               |               | -0.56   |        | 0.67 (0.61, | 0.49 (0.44, | -1.06   |        |
| Central Latin  | — | — | — | — | (252.98,      | (301.90, | (0.58,  | <0.001 | 53.57 (53.00, | 45.23 (44.82, | (-0.78, | <0.001 | 0.74)       | 0.53)       | (-1.39, | <0.001 |
| America        |   |   |   |   | 255.37)       | 304.05)  | 0.63)   |        | 54.13)        | 45.65)        | -0.34)  |        |             |             | -0.72)  |        |
|                |   |   |   |   | 244.32        | 275.16   | 0.41    |        |               |               | -0.23   |        | 0.84 (0.77, | 0.74 (0.69, | -0.35   |        |
| Tropical Latin | — | — | — | — | (243.13,      | (274.05, | (0.38,  | <0.001 | 62.42 (61.80, | 58.44 (57.94, | (-0.48, | 0.072  | 0.92)       | 0.80)       | (-0.64, | 0.021  |
| America        |   |   |   |   | 245.52)       | 276.26)  | 0.44)   |        | 63.04)        | 58.94)        | 0.02)   |        |             |             | -0.05)  |        |
|                |   |   |   |   | 449.80        | 483.17   | 0.27    |        |               |               | -0.41   |        | 0.96 (0.82, | 0.78 (0.70, | -0.74   |        |
| Central        |   |   |   |   | (446.91,      | (481.27, | (0.25,  | <0.001 | 80.41 (79.15, | 71.77 (71.02, | (-0.46, | <0.001 | 1.11)       | 0.86)       | (-0.87, | <0.001 |
| Sub-Saharan    | — | — | — | — | 452.71)       | 485.07)  | 0.29)   |        | 81.69)        | 72.52)        | -0.35)  |        |             |             | -0.61)  |        |
| Africa         |   |   |   |   | 348.70        | 328.99   | -0.20   |        |               |               | -0.98   |        | 0.56 (0.53, | 0.37 (0.34, | -1.47   |        |
|                |   |   |   |   | (347.74,      | (328.00, | (-0.24, | <0.001 | 51.81 (51.44, | 39.38 (39.05, | (-1.13, | <0.001 | 0.60)       | 0.41)       | (-1.81, | <0.001 |
| Western Europe | — | — | — | — | 349.66)       | 329.98)  | -0.17)  |        | 52.18)        | 39.72)        | -0.83)  |        |             |             | -1.13)  |        |
|                |   |   |   |   | 501.92        | 366.29   | -1.06   |        |               |               | -0.08   |        | 0.61 (0.56, | 0.70 (0.66, | 0.54    |        |
| High-income    | — | — | — | — | (500.62,      | (365.22, | (-1.09, | <0.001 | 62.31 (61.86, | 60.37 (59.94, | (-0.25, | 0.324  | 0.65)       | 0.75)       | (0.26,  | <0.001 |
| North America  |   |   |   |   | 503.23)       | 367.36)  | -1.03)  |        | 62.77)        | 60.80)        | 0.08)   |        |             |             | 0.82)   |        |
|                |   |   |   |   | 116.71        | 115.05   | -0.05   |        |               |               | -0.92   |        | 0.94 (0.83, | 0.72 (0.63, | -1.01   |        |
| Central Asia   | — | — | — | — | (115.47,      | (113.95, | (-0.06, | <0.001 | 62.37 (61.44, | 48.57 (47.88, | (-1.46, | 0.001  | 1.07)       | 0.81)       | (-1.68, | 0.004  |
|                |   |   |   |   | 117.96)       | 116.15)  | -0.03)  |        | 63.31)        | 49.28)        | -0.38)  |        |             |             | -0.33)  |        |
|                |   |   |   |   | 99.32 (98.63, | 104.11   | 0.17    |        |               |               | 1.55    |        | 0.57 (0.52, | 0.92 (0.85, | 1.85    |        |
| Eastern Europe | — | — | — | — | 100.02)       | (103.27, | (0.15,  | <0.001 | 39.18 (38.76, | 58.44 (57.89, | (0.39,  | 0.009  | 0.62)       | 0.99)       | (0.53,  | 0.006  |
|                |   |   |   |   |               | 104.96)  | 0.18)   |        | 39.60)        | 59.01)        | 2.71)   |        |             |             | 3.19)   |        |
| Southern       |   |   |   |   | 318.59        | 332.38   | 0.14    |        |               |               | -0.53   |        | 0.92 (0.79, | 0.77 (0.68, | -0.74   |        |
| Sub-Saharan    | — | — | — | — | (316.25,      | (330.43, | (0.11,  | <0.001 | 70.71 (69.55, | 62.96 (62.12, | (-1.03, | 0.040  | 1.07)       | 0.87)       | (-1.51, | 0.062  |
|                |   |   |   |   | 71.88)        | 63.82)   |         |        | 71.88)        | 63.82)        |         |        |             |             |         |        |











|                              |   |   |   |   |               |          |         |        |  |               |               |         |        |             |             |         |        |
|------------------------------|---|---|---|---|---------------|----------|---------|--------|--|---------------|---------------|---------|--------|-------------|-------------|---------|--------|
|                              |   |   |   |   | 59.76 (59.48, | 90.27    | 1.43    |        |  | 23.26 (23.08, | 16.99 (16.83, | -1.10   |        | 0.33 (0.31, | 0.20 (0.19, | -1.73   |        |
| East Asia                    | — | — | — | — | 60.05)        | (89.90,  | (1.34,  | <0.001 |  | 23.44)        | 17.15)        | (-1.46, | <0.001 | 0.36)       | 0.22)       | (-2.44, | <0.001 |
|                              |   |   |   |   |               | 90.64)   | 1.51)   |        |  |               |               | -0.75)  |        |             |             | -1.01)  |        |
|                              |   |   |   |   | 432.27        | 451.16   | 0.16    |        |  | 94.04 (93.30, | 79.52 (79.04, | -0.56   |        | 1.18 (1.10, | 0.91 (0.86, | -0.87   |        |
| North Africa and Middle East | — | — | — | — | (430.72,      | (450.02, | (0.09,  | <0.001 |  | 94.78)        | 79.99)        | (-0.71, | <0.001 | 1.27)       | 0.96)       | (-1.07, | <0.001 |
|                              |   |   |   |   | 433.82)       | 452.31)  | 0.22)   |        |  |               |               | -0.40)  |        |             |             | -0.68)  |        |
|                              |   |   |   |   | 773.12        | 853.58   | 0.34    |        |  | 142.62        | 126.45        | -0.42   |        | 1.68 (1.54, | 1.34 (1.26, | -0.78   |        |
| Western Sub-Saharan Africa   | — | — | — | — | (770.23,      | (851.65, | (0.32,  | <0.001 |  | (141.34,      | (125.68,      | (-0.49, | <0.001 | 1.83)       | 1.42)       | (-0.91, | <0.001 |
|                              |   |   |   |   | 776.02)       | 855.51)  | 0.37)   |        |  | 143.92)       | 127.22)       | -0.36)  |        |             |             | -0.64)  |        |
|                              |   |   |   |   | 161.00        | 177.38   | 0.33    |        |  | 49.59 (49.13, | 44.22 (43.87, | -0.40   |        | 0.69 (0.64, | 0.58 (0.54, | -0.62   |        |
| Southeast Asia               | — | — | — | — | (160.21,      | (176.68, | (0.32,  | <0.001 |  | 50.04)        | 44.57)        | (-0.60, | <0.001 | 0.75)       | 0.62)       | (-0.89, | <0.001 |
|                              |   |   |   |   | 161.80)       | 178.09)  | 0.35)   |        |  |               |               | -0.19)  |        |             |             | -0.34)  |        |
|                              |   |   |   |   | 351.98        | 394.41   | 0.39    |        |  | 98.78 (97.68, | 84.20 (83.55, | -0.55   |        | 1.34 (1.21, | 1.05 (0.98, | -0.84   |        |
| Eastern Sub-Saharan Africa   | — | — | — | — | (349.99,      | (393.05, | (0.37,  | <0.001 |  | 99.90)        | 84.85)        | (-0.68, | <0.001 | 1.48)       | 1.13)       | (-1.01, | <0.001 |
|                              |   |   |   |   | 353.98)       | 395.78)  | 0.41)   |        |  |               |               | -0.42)  |        |             |             | -0.66)  |        |
|                              |   |   |   |   | 152.68        | 198.37   | 0.90    |        |  | 45.23 (44.49, | 38.37 (37.83, | -0.56   |        | 0.62 (0.54, | 0.47 (0.41, | -0.92   |        |
| Central Latin America        | — | — | — | — | (151.39,      | (197.14, | (0.88,  | <0.001 |  | 45.98)        | 38.92)        | (-0.88, | 0.001  | 0.72)       | 0.53)       | (-1.38, | <0.001 |
|                              |   |   |   |   | 153.98)       | 199.61)  | 0.93)   |        |  |               |               | -0.23)  |        |             |             | -0.46)  |        |
|                              |   |   |   |   | 139.43        | 164.59   | 0.57    |        |  | 55.38 (54.55, | 49.10 (48.45, | -0.37   |        | 0.82 (0.72, | 0.68 (0.61, | -0.59   |        |
| Tropical Latin America       | — | — | — | — | (138.17,      | (163.38, | (0.56,  | <0.001 |  | 56.23)        | 49.76)        | (-0.56, | <0.001 | 0.93)       | 0.76)       | (-0.86, | <0.001 |
|                              |   |   |   |   | 140.71)       | 165.81)  | 0.58)   |        |  |               |               | -0.17)  |        |             |             | -0.32)  |        |
|                              |   |   |   |   | 313.41        | 332.17   | 0.21    |        |  | 75.55 (73.81, | 67.36 (66.33, | -0.42   |        | 1.00 (0.80, | 0.84 (0.72, | -0.63   |        |
| Central Sub-Saharan Africa   | — | — | — | — | (310.02,      | (329.96, | (0.19,  | <0.001 |  | 77.32)        | 68.40)        | (-0.50, | <0.001 | 1.23)       | 0.96)       | (-0.76, | <0.001 |
|                              |   |   |   |   | 316.84)       | 334.40)  | 0.23)   |        |  |               |               | -0.33)  |        |             |             | -0.50)  |        |
|                              |   |   |   |   | 190.30        | 183.18   | -0.13   |        |  | 43.69 (43.21, | 30.58 (30.17, | -1.28   |        | 0.57 (0.52, | 0.36 (0.31, | -1.60   |        |
| Western Europe               | — | — | — | — | (189.30,      | (182.14, | (-0.21, | 0.001  |  | 44.17)        | 31.00)        | (-1.53, | <0.001 | 0.63)       | 0.40)       | (-2.13, | <0.001 |
|                              |   |   |   |   | 191.31)       | 184.22)  | -0.06)  |        |  |               |               | -1.03)  |        |             |             | -1.07)  |        |
|                              |   |   |   |   | 257.56        | 183.15   | -1.15   |        |  | 46.07 (45.52, | 44.50 (43.98, | -0.10   |        | 0.55 (0.50, | 0.60 (0.54, | 0.28    |        |
| High-income North America    | — | — | — | — | (256.24,      | (182.09, | (-1.21, | <0.001 |  | 46.63)        | 45.02)        | (-0.47, | 0.597  | 0.62)       | 0.66)       | (-0.09, | 0.141  |
|                              |   |   |   |   | 258.89)       | 184.23)  | -1.09)  |        |  |               |               | 0.27)   |        |             |             | 0.66)   |        |
|                              |   |   |   |   | 109.99        | 114.55   | 0.14    |        |  | 70.55 (69.15, | 54.60 (53.56, | -0.85   |        | 1.10 (0.93, | 0.82 (0.70, | -1.04   |        |
| Central Asia                 | — | — | — | — | (108.30,      | (113.01, | (0.13,  | <0.001 |  | 71.98)        | 55.65)        | (-1.30, | <0.001 | 1.29)       | 0.96)       | (-1.46, | <0.001 |
|                              |   |   |   |   | 111.71)       | 116.11)  | 0.16)   |        |  |               |               | -0.41)  |        |             |             | -0.61)  |        |

|                  |   |   |   |   |               |          |         |        |  |               |               |         |        |             |             |         |        |
|------------------|---|---|---|---|---------------|----------|---------|--------|--|---------------|---------------|---------|--------|-------------|-------------|---------|--------|
|                  |   |   |   |   | 75.22 (74.37, | 81.90    | 0.30    |        |  | 44.42 (43.80, | 72.31 (71.45, | 1.82    |        | 0.69 (0.61, | 1.19 (1.08, | 2.05    |        |
| Eastern Europe   | — | — | — | — | 76.08)        | (80.84,  | (0.28,  | <0.001 |  | 45.05)        | 73.18)        | (0.41,  | 0.012  | 0.77)       | 1.30)       | (0.53,  | 0.008  |
|                  |   |   |   |   |               | 82.97)   | 0.32)   |        |  |               |               | 3.26)   |        |             |             | 3.60)   |        |
| Southern         |   |   |   |   | 278.79        | 286.23   | 0.09    |        |  | 67.26 (65.64, | 65.95 (64.73, | -0.09   |        | 0.91 (0.72, | 0.86 (0.73, | -0.24   |        |
| Sub-Saharan      | — | — | — | — | (275.67,      | (283.66, | (0.07,  | <0.001 |  | 68.92)        | 67.19)        | (-0.55, | 0.696  | 1.13)       | 1.01)       | (-0.85, | 0.443  |
| Africa           |   |   |   |   | 281.95)       | 288.82)  | 0.11)   |        |  |               |               | 0.37)   |        |             |             | 0.37)   |        |
| High-income Asia |   |   |   |   | 187.10        | 185.88   | -0.03   |        |  | 33.42 (32.81, | 21.49 (20.95, | -1.52   |        | 0.39 (0.33, | 0.19 (0.14, | -2.49   |        |
| Pacific          | — | — | — | — | (185.66,      | (184.24, | (-0.13, | 0.577  |  | 34.04)        | 22.05)        | (-1.67, | <0.001 | 0.46)       | 0.25)       | (-2.65, | <0.001 |
|                  |   |   |   |   | 188.56)       | 187.54)  | 0.07)   |        |  |               |               | -1.36)  |        |             |             | -2.34)  |        |
|                  |   |   |   |   | 270.44        | 280.43   | 0.13    |        |  | 85.79 (84.62, | 46.56 (45.58, | -2.13   |        | 1.24 (1.10, | 0.54 (0.44, | -2.89   |        |
| Central Europe   | — | — | — | — | (268.29,      | (277.88, | (0.11,  | <0.001 |  | 86.97)        | 47.56)        | (-2.33, | <0.001 | 1.39)       | 0.66)       | (-3.17, | <0.001 |
|                  |   |   |   |   | 272.59)       | 283.01)  | 0.16)   |        |  |               |               | -1.94)  |        |             |             | -2.62)  |        |
|                  |   |   |   |   | 250.21        | 311.98   | 0.76    |        |  | 89.54 (87.40, | 52.64 (51.40, | -1.75   |        | 1.25 (1.00, | 0.59 (0.46, | -2.49   |        |
| Andean Latin     | — | — | — | — | (246.78,      | (308.96, | (0.74,  | <0.001 |  | 91.73)        | 53.91)        | (-2.04, | <0.001 | 1.54)       | 0.74)       | (-2.94, | <0.001 |
| America          |   |   |   |   | 253.68)       | 315.02)  | 0.78)   |        |  |               |               | -1.46)  |        |             |             | -2.03)  |        |
|                  |   |   |   |   | 171.95        | 204.31   | 0.60    |        |  | 65.04 (63.15, | 71.23 (69.49, | 0.36    |        | 0.95 (0.73, | 1.02 (0.83, | 0.31    |        |
| Caribbean        | — | — | — | — | (168.99,      | (201.37, | (0.58,  | <0.001 |  | 66.98)        | 73.00)        | (0.23,  | <0.001 | 1.21)       | 1.26)       | (0.14,  | <0.001 |
|                  |   |   |   |   | 174.96)       | 207.28)  | 0.62)   |        |  |               |               | 0.48)   |        |             |             | 0.48)   |        |
|                  |   |   |   |   | 143.61        | 213.03   | 1.36    |        |  | 56.05 (54.54, | 45.60 (44.44, | -0.72   |        | 0.83 (0.65, | 0.58 (0.46, | -1.22   |        |
| Southern Latin   | — | — | — | — | (141.23,      | (210.49, | (1.33,  | <0.001 |  | 57.60)        | 46.79)        | (-1.03, | <0.001 | 1.03)       | 0.73)       | (-1.58, | <0.001 |
| America          |   |   |   |   | 146.02)       | 215.60)  | 1.40)   |        |  |               |               | -0.41)  |        |             |             | -0.87)  |        |
|                  |   |   |   |   | 126.58        | 119.27   | -0.20   |        |  | 81.10 (76.23, | 74.47 (71.25, | -0.32   |        | 1.25 (0.71, | 1.14 (0.77, | -0.34   |        |
| Oceania          | — | — | — | — | (120.75,      | (115.29, | (-0.21, | <0.001 |  | 86.23)        | 77.80)        | (-0.42, | <0.001 | 2.07)       | 1.63)       | (-0.46, | <0.001 |
|                  |   |   |   |   | 132.65)       | 123.35)  | -0.19)  |        |  |               |               | -0.22)  |        |             |             | -0.21)  |        |
|                  |   |   |   |   | 117.65        | 111.34   | -0.19   |        |  | 22.95 (21.51, | 22.60 (21.30, | -0.07   |        | 0.28 (0.14, | 0.29 (0.16, | 0.08    |        |
| Australasia      | — | — | — | — | (114.36,      | (108.42, | (-0.21, | <0.001 |  | 24.46)        | 23.95)        | (-0.33, | 0.597  | 0.49)       | 0.48)       | (-0.38, | 0.731  |
|                  |   |   |   |   | 121.01)       | 114.32)  | -0.17)  |        |  |               |               | 0.19)   |        |             |             | 0.54)   |        |

CI, confidence interval; GBD, global burden disease

“—” indicates that data are unavailable; \* significantly different from zero ( $P<0.05$ ).

**Table S2 Age-specific incidence, prevalence, disability-adjusted life years, and death rate of the overall and type-specific cardiovascular disease in youths and young adults from 1990 to 2019 by age, sex, sociodemographic index, and 21 GBD regions**

|                                | Incidence                         |                                   |                                           |         | Prevalence                        |                                   |                                           |         | Disability-adjusted life years    |                                   |                                           |         | Death                             |                                   |                                           |         |
|--------------------------------|-----------------------------------|-----------------------------------|-------------------------------------------|---------|-----------------------------------|-----------------------------------|-------------------------------------------|---------|-----------------------------------|-----------------------------------|-------------------------------------------|---------|-----------------------------------|-----------------------------------|-------------------------------------------|---------|
|                                | Rate per 100,000 (95% CI) in 1990 | Rate per 100,000 (95% CI) in 2019 | Average annual percent change %, (95% CI) | P-value | Rate per 100,000 (95% CI) in 1990 | Rate per 100,000 (95% CI) in 2019 | Average annual percent change %, (95% CI) | P-value | Rate per 100,000 (95% CI) in 1990 | Rate per 100,000 (95% CI) in 2019 | Average annual percent change %, (95% CI) | P-value | Rate per 100,000 (95% CI) in 1990 | Rate per 100,000 (95% CI) in 2019 | Average annual percent change %, (95% CI) | P-value |
| <b>Cardiovascular diseases</b> |                                   |                                   |                                           |         |                                   |                                   |                                           |         |                                   |                                   |                                           |         |                                   |                                   |                                           |         |
| <b>15-19 years</b>             |                                   |                                   |                                           |         |                                   |                                   |                                           |         |                                   |                                   |                                           |         |                                   |                                   |                                           |         |
| <b>Women</b>                   |                                   |                                   |                                           |         |                                   |                                   |                                           |         |                                   |                                   |                                           |         |                                   |                                   |                                           |         |
| Global                         | 100.65 (68.81, 134.99)            | 118.36 (77.85, 159.99)            | 0.56 (0.54, 0.59)                         | <0.001  | 1142.56 (857.28, 1486.42)         | 1408.64 (1038.03, 1859.13)        | 0.73 (0.67, 0.79)                         | <0.001  | 548.20 (499.42, 601.93)           | 394.75 (345.22, 448.86)           | -1.15 (-1.45, -0.85)                      | <0.001  | 6.39 (5.83, 6.94)                 | 4.07 (3.58, 4.57)                 | -1.55 (-1.86, -1.23)                      | <0.001  |
| <b>SDI category</b>            |                                   |                                   |                                           |         |                                   |                                   |                                           |         |                                   |                                   |                                           |         |                                   |                                   |                                           |         |
| High                           | 36.19 (27.72, 46.31)              | 37.96 (29.61, 47.80)              | 0.17 (0.14, 0.20)                         | <0.001  | 606.01 (436.28, 837.16)           | 588.65 (442.99, 772.30)           | -0.01 (-0.43, 0.41)                       | 0.960   | 234.53 (211.46, 260.65)           | 142.53 (121.66, 166.82)           | -1.67 (-1.97, -1.37)                      | <0.001  | 2.42 (2.26, 2.57)                 | 1.11 (1.03, 1.20)                 | -2.54 (-2.83, -2.24)                      | <0.001  |
| High-middle                    | 59.86 (44.98, 77.35)              | 61.19 (45.38, 79.92)              | 0.08 (0.02, 0.14)                         | 0.011   | 747.32 (580.70, 937.37)           | 819.70 (630.44, 1043.74)          | 0.32 (0.29, 0.35)                         | <0.001  | 368.07 (328.66, 408.20)           | 237.26 (207.41, 268.96)           | -1.48 (-1.69, -1.28)                      | <0.001  | 4.10 (3.72, 4.57)                 | 2.23 (2.00, 2.46)                 | -2.07 (-2.31, -1.82)                      | <0.001  |
| Middle                         | 98.71 (67.11, 133.90)             | 98.07 (66.28, 132.24)             | -0.01 (-0.09, 0.06)                       | 0.696   | 1144.92 (855.78, 1500.08)         | 1236.98 (914.22, 1616.53)         | 0.27 (0.23, 0.32)                         | <0.001  | 573.73 (522.52, 632.63)           | 384.25 (337.24, 427.38)           | -1.36 (-1.59, -1.13)                      | <0.001  | 6.70 (6.16, 7.28)                 | 4.01 (3.56, 4.49)                 | -1.74 (-2.03, -1.44)                      | <0.001  |
| Low-middle                     | 140.93 (92.64, 191.13)            | 149.70 (96.46, 205.57)            | 0.23 (0.12, 0.34)                         | <0.001  | 1357.18 (988.54, 1803.38)         | 1553.25 (1119.53, 2103.19)        | 0.48 (0.42, 0.53)                         | <0.001  | 770.66 (672.87, 869.66)           | 503.65 (433.95, 583.50)           | -1.49 (-1.89, -1.08)                      | <0.001  | 9.43 (8.09, 10.71)                | 5.53 (4.67, 6.44)                 | -1.87 (-2.36, -1.37)                      | <0.001  |
| Low                            | 169.50 (104.69, 240.36)           | 177.82 (106.09, 253.34)           | 0.17 (0.10, 0.24)                         | <0.001  | 2020.87 (1424.13, 2727.23)        | 2208.03 (1568.09, 3019.65)        | 0.32 (0.25, 0.40)                         | <0.001  | 668.91 (558.67, 789.47)           | 476.00 (397.11, 568.98)           | -1.16 (-1.44, -0.87)                      | <0.001  | 7.53 (6.19, 8.93)                 | 4.67 (3.79, 5.68)                 | -1.64 (-1.84, -1.44)                      | <0.001  |

| 21 GBD region                |                  |                  |                      |        |                    |                    |                    |        |                   |                        |                |        |                |              |                |        |
|------------------------------|------------------|------------------|----------------------|--------|--------------------|--------------------|--------------------|--------|-------------------|------------------------|----------------|--------|----------------|--------------|----------------|--------|
|                              | 145.54           | 148.50           |                      |        | 1171.50            | 1245.21            |                    |        | 851.04            | 515.85                 | -1.80          |        | 10.72          | 5.95         | -2.12          |        |
| South Asia                   | (100.29, 194.27) | (100.45, 201.88) | 0.08 (0.05, 0.12)    | <0.001 | (839.93, 1569.21)  | (895.75, 1715.62)  | 0.23 (0.17, 0.30)  | <0.001 | (732.90, 978.58)  | (441.19, 598.52)       | (-2.46, -1.14) | <0.001 | (8.97, 12.37)  | (4.99, 7.03) | (-2.90, -1.33) | <0.001 |
| East Asia                    | (58.07, 117.30)  | (48.31, 97.52)   | -0.64 (-0.77, -0.50) | <0.001 | (652.22, 1190.00)  | (585.35, 1035.65)  | (-0.53, -0.24)     | <0.001 | (354.69, 485.40)  | (180.49, 253.06)       | (-2.50, -2.03) | <0.001 | (3.86, 5.55)   | (1.55, 2.14) | (-3.38, -2.90) | <0.001 |
| North Africa and Middle East | (56.70, 104.59)  | (59.40, 112.80)  | 0.24 (0.22, 0.26)    | <0.001 | (923.74, 1628.26)  | (971.81, 1760.30)  | 0.26 (0.21, 0.31)  | <0.001 | (854.95, 1116.94) | (464.23, 693.15)       | (-2.00, -1.58) | <0.001 | (10.69, 14.23) | (5.23, 8.20) | (-2.35, -1.81) | <0.001 |
| Western Sub-Saharan Africa   | (84.59, 202.19)  | (87.13, 212.89)  | 0.19 (0.16, 0.23)    | <0.001 | (1604.34, 3276.51) | (1721.46, 3546.21) | 0.27 (0.24, 0.29)  | <0.001 | (427.29, 675.70)  | (319.48, 520.99)       | (-1.00, -0.84) | <0.001 | (4.13, 7.15)   | (2.62, 4.74) | (-1.65, -1.31) | <0.001 |
| Southeast Asia               | (51.62, 90.65)   | (52.19, 92.42)   | 0.10 (0.06, 0.14)    | <0.001 | (609.14, 993.92)   | (650.06, 1063.53)  | 0.25 (0.17, 0.34)  | <0.001 | (449.18, 614.35)  | (344.20, 451.78)       | (-1.09, -0.80) | <0.001 | (5.14, 7.30)   | (3.70, 4.99) | (-1.38, -1.03) | <0.001 |
| Eastern Sub-Saharan Africa   | (121.55, 314.40) | (127.11, 337.90) | 0.22 (0.17, 0.27)    | <0.001 | (1966.85, 3770.29) | (2161.43, 4146.96) | 0.31 (0.19, 0.43)  | <0.001 | (500.03, 749.29)  | (364.33, 564.01)       | (-1.19, -0.88) | <0.001 | (4.83, 7.78)   | (2.89, 4.79) | (-1.90, -1.56) | <0.001 |
| Central Latin America        | (59.61, 108.70)  | (57.55, 109.58)  | -0.02 (-0.08, 0.03)  | 0.404  | (871.74, 1422.05)  | (890.42, 1467.25)  | 0.09 (-0.01, 0.20) | 0.083  | (376.93, 442.40)  | (225.82, 304.94)       | (-1.77, -1.15) | <0.001 | (4.40, 4.93)   | (2.25, 3.06) | (-2.38, -1.49) | <0.001 |
| Tropical Latin America       | (97.24, 226.91)  | (94.85, 226.93)  | -0.02 (-0.04, -0.00) | 0.017  | (1434.11, 2612.35) | (1449.71, 2698.55) | 0.10 (0.08, 0.12)  | <0.001 | (421.62, 526.51)  | (272.89, 377.25)       | (-1.61, -1.01) | <0.001 | (4.65, 5.26)   | (2.61, 3.04) | (-2.25, -1.54) | <0.001 |
| Central Sub-Saharan Africa   | (113.00, 306.50) | (112.04, 317.60) | 0.12 (0.08, 0.15)    | <0.001 | (1917.30, 3889.80) | (2026.30, 4031.81) | 0.11 (0.07, 0.14)  | <0.001 | (409.02, 772.21)  | (331.07, 567.51)       | (-1.15, -0.94) | <0.001 | (3.65, 8.27)   | (2.54, 5.32) | (-1.72, -1.49) | <0.001 |
| Western Europe               | (21.81, 39.71)   | (20.99, 39.11)   | -0.10 (-0.15, -0.06) | <0.001 | (386.17, 758.33)   | (374.79, 737.58)   | (-0.30, 0.27)      | 0.916  | (171.95, 213.07)  | 102.90 (86.26, 124.42) | (-2.40, -1.93) | <0.001 | (1.87, 2.06)   | (0.68, 0.81) | (-3.75, -3.03) | <0.001 |
| High-income North America    | (34.24, 42.80)   | (37.22, 45.87)   | 0.24 (0.20, 0.27)    | <0.001 | (564.70, 825.91)   | (519.27, 679.81)   | (-1.04, -0.55)     | 0.030  | (171.30, 197.93)  | (139.02, 165.03)       | (-0.85, -0.55) | <0.001 | (1.64, 1.71)   | (1.20, 1.29) | (-2.04, -0.90) | 0.124  |



|                             | 2019     | 2020     | Change (2019-2020) | Significance | 2019      | 2020      | Change (2019-2020) | Significance | 2019     | 2020          | Change (2019-2020) | Significance | 2019   | 2020   | Change (2019-2020) | Significance |
|-----------------------------|----------|----------|--------------------|--------------|-----------|-----------|--------------------|--------------|----------|---------------|--------------------|--------------|--------|--------|--------------------|--------------|
| Central Asia                | 53.61)   | 56.65)   |                    |              | 1180.02)  | 891.26)   | -0.05)             |              | 230.60)  | 192.76)       | -0.24)             |              | 1.78)  | 1.39)  | 0.25)              |              |
|                             | 106.83   | 109.89   |                    |              | 1130.57   | 1178.78   |                    |              | 517.32   | 380.56        | -1.00              |              | 5.99   | 4.04   | -1.34              |              |
|                             | (69.64,  | (68.91,  | 0.10 (0.08,        | <0.001       | (825.42,  | (852.05,  | 0.15 (0.10,        | <0.001       | (479.16, | (329.03,      | (-1.34,            | <0.001       | (5.62, | (3.49, | (-1.84,            | <0.001       |
|                             | 146.94)  | 153.86)  | 0.12)              |              | 1501.60)  | 1587.35)  | 0.20)              |              | 561.88)  | 438.30)       | -0.65)             |              | 6.36)  | 4.68)  | -0.83)             |              |
| Eastern Europe              | 38.27    | 41.88    |                    |              | 460.87    | 526.82    |                    |              | 269.08   | 244.36        | -0.32              |              | 2.84   | 2.35   | -0.75              |              |
|                             | (29.35,  | (32.15,  | 0.34 (0.25,        | <0.001       | (354.17,  | (411.86,  | 0.50 (0.30,        | <0.001       | (245.79, | (212.51,      | (-1.32,            | 0.536        | (2.74, | (2.09, | (-2.19,            | 0.315        |
|                             | 49.59)   | 54.15)   | 0.42)              |              | 593.39)   | 663.98)   | 0.71)              |              | 296.17)  | 280.73)       | 0.69)              |              | 2.97)  | 2.62)  | 0.71)              |              |
| Southern Sub-Saharan Africa | 197.08   | 197.57   |                    |              | 2565.73   | 2584.74   |                    |              | 541.89   | 396.64        | -1.01              |              | 5.26   | 3.23   | -1.55              |              |
|                             | (112.10, | (110.68, | 0.02 (-0.04,       | 0.489        | (1843.49, | (1840.44, | 0.03 (0.01,        | 0.010        | (446.02, | (307.32,      | (-1.39,            | <0.001       | (4.30, | (2.27, | (-2.13,            | <0.001       |
|                             | 287.35)  | 287.56)  | 0.08)              |              | 3457.83)  | 3485.57)  | 0.05)              |              | 639.41)  | 513.18)       | -0.64)             |              | 6.17)  | 4.45)  | -0.97)             |              |
| High-income Asia Pacific    | 37.81    | 36.68    |                    |              | 343.30    | 368.37    |                    |              | 293.77   | 96.53 (79.91, | -3.78              |              | 3.44   | 0.66   | -5.58              |              |
|                             | (29.94,  | (28.77,  | -0.10 (-0.13,      | <0.001       | (245.30,  | (269.76,  | 0.28 (0.06,        | 0.014        | (259.75, | 114.78)       | (-4.25,            | <0.001       | (3.05, | (0.60, | (-6.51,            | <0.001       |
|                             | 47.51)   | 46.02)   | -0.07)             |              | 471.09)   | 490.11)   | 0.51)              |              | 326.69)  |               | -3.32)             |              | 3.85)  | 0.73)  | -4.63)             |              |
| Central Europe              | 35.33    | 35.50    |                    |              | 808.25    | 808.74    |                    |              | 280.64   | 174.54        | -1.62              |              | 2.74   | 1.25   | -2.68              |              |
|                             | (27.32,  | (27.63,  | 0.02 (-0.03,       | 0.435        | (574.84,  | (580.49,  | 0.04 (-0.14,       | 0.641        | (249.44, | (143.53,      | (-1.85,            | <0.001       | (2.59, | (1.08, | (-3.06,            | <0.001       |
|                             | 45.62)   | 45.88)   | 0.07)              |              | 1106.55)  | 1096.37)  | 0.22)              |              | 315.45)  | 209.85)       | -1.39)             |              | 2.91)  | 1.44)  | -2.29)             |              |
| Andean Latin America        | 138.58   | 136.69   |                    |              | 1712.40   | 1780.22   |                    |              | 699.56   | 397.42        | -1.99              |              | 8.39   | 4.12   | -2.49              |              |
|                             | (86.63,  | (84.54,  | -0.04 (-0.07,      | 0.018        | (1259.42, | (1262.38, | 0.14 (0.08,        | <0.001       | (579.23, | (311.20,      | (-2.56,            | <0.001       | (6.82, | (3.13, | (-3.17,            | <0.001       |
|                             | 193.88)  | 195.26)  | -0.01)             |              | 2292.10)  | 2374.92)  | 0.20)              |              | 829.91)  | 499.27)       | -1.41)             |              | 10.13) | 5.38)  | -1.80)             |              |
| Caribbean                   | 140.88   | 151.51   |                    |              | 1521.39   | 1600.19   |                    |              | 658.13   | 564.60        | -0.30              |              | 7.97   | 6.61   | -0.38              |              |
|                             | (91.17,  | (98.08,  | 0.25 (0.22,        | <0.001       | (1128.45, | (1154.35, | 0.18 (0.15,        | <0.001       | (529.40, | (397.21,      | (-0.55,            | 0.017        | (6.22, | (4.30, | (-0.68,            | 0.013        |
|                             | 194.62)  | 210.46)  | 0.29)              |              | 2030.70)  | 2146.60)  | 0.22)              |              | 808.45)  | 798.28)       | -0.05)             |              | 10.10) | 9.97)  | -0.08)             |              |
| Southern Latin America      | 74.32    | 78.58    |                    |              | 1084.22   | 1179.68   |                    |              | 423.45   | 248.86        | -1.84              |              | 4.82   | 2.33   | -2.50              |              |
|                             | (48.87,  | (52.71,  | 0.20 (0.14,        | <0.001       | (792.48,  | (855.15,  | 0.29 (0.21,        | <0.001       | (377.87, | (209.40,      | (-2.14,            | <0.001       | (4.31, | (1.98, | (-2.90,            | <0.001       |
|                             | 101.57)  | 109.14)  | 0.26)              |              | 1446.95)  | 1573.93)  | 0.38)              |              | 473.48)  | 292.14)       | -1.54)             |              | 5.34)  | 2.71)  | -2.11)             |              |
| Oceania                     | 86.14    | 90.22    |                    |              | 1166.25   | 1218.52   |                    |              | 773.66   | 821.47        | 0.30               |              | 9.41   | 10.05  |                    |              |
|                             | (60.19,  | (61.37,  | 0.17 (0.12,        | <0.001       | (871.80,  | (905.20,  | 0.17 (0.10,        | <0.001       | (521.01, | (561.84,      | (0.20,             | <0.001       | (5.98, | (6.41, | 0.32 (0.21,        | <0.001       |
|                             | 123.69)  | 129.36)  | 0.22)              |              | 1555.12)  | 1621.43)  | 0.24)              |              | 1096.17) | 1152.76)      | 0.39)              |              | 14.11) | 14.71) | 0.43)              |              |
| Australasia                 | 26.86    | 27.40    |                    |              | 346.75    | 339.66    |                    |              | 155.89   | 86.61 (68.03, | -1.92              |              | 1.59   | 0.63   | -3.03              |              |
|                             | (18.81,  | (19.87,  | 0.08 (0.02,        | 0.003        | (247.08,  | (243.15,  | (-0.19,            | 0.630        | (133.51, | 107.92)       | (-2.87,            | <0.001       | (1.40, | (0.52, | (-4.91,            | 0.002        |
|                             | 36.14)   | 37.07)   | 0.13)              |              | 467.66)   | 449.07)   | 0.12)              |              | 181.67)  |               | -0.95)             |              | 1.81)  | 0.77)  | -1.11)             |              |
| <b>Men</b>                  |          |          |                    |              |           |           |                    |              |          |               |                    |              |        |        |                    |              |
| Global                      | 90.98    | 103.67   | 0.47 (0.36,        | <0.001       | 916.12    | 1135.66   | 0.75 (0.71,        | <0.001       | 591.19   | 447.00        | -1.00              | <0.001       | 7.34   | 5.18   | -1.24              | <0.001       |



|                             |                  |                  |                      |  |                    |                    |                    |        |                   |                        |                |        |               |              |                    |
|-----------------------------|------------------|------------------|----------------------|--|--------------------|--------------------|--------------------|--------|-------------------|------------------------|----------------|--------|---------------|--------------|--------------------|
|                             | 80.37)           | 82.90)           |                      |  | 773.77)            | 833.71)            |                    |        | 596.20)           | 583.79)                | 0.32)          |        | 7.56)         | 7.31)        |                    |
| Eastern Sub-Saharan Africa  | 197.01)          | 207.22)          | 0.19 (0.14, <0.001   |  | 2196.97)           | 2424.14)           | 0.36 (0.29, <0.001 |        | 881.56)           | 654.17)                | -1.01)         |        | 10.55)        | 7.20)        | -1.30)             |
|                             | (115.12, 279.73) | (119.80, 302.74) | 0.25)                |  | (1536.88, 3029.49) | (1696.33, 3310.72) | 0.42)              |        | (713.31, 1049.80) | (536.39, 779.25)       | (-1.11, -0.91) | <0.001 | (8.32, 12.76) | (5.81, 8.81) | (-1.39, -1.20)     |
| Central Latin America       | 69.40)           | 71.31)           | 0.09 (0.08, <0.001   |  | 826.65)            | 873.64)            | 0.20 (0.18, <0.001 |        | 406.27)           | 304.02)                | -0.86)         |        | 5.00)         | 3.53)        | -1.04)             |
|                             | (49.79, 91.64)   | (51.31, 95.14)   | 0.11)                |  | (628.71, 1067.26)  | (663.05, 1130.57)  | 0.21)              |        | (378.31, 439.39)  | (256.25, 356.86)       | (-1.18, -0.54) | <0.001 | (4.67, 5.32)  | (2.91, 4.21) | (-1.36, -0.72)     |
| Tropical Latin America      | 140.05)          | 136.47)          | -0.09 (-0.10, <0.001 |  | 1535.40)           | 1519.63)           | -0.03)             | 0.001  | 536.09)           | 406.38)                | -0.97)         |        | 6.31)         | 4.51)        | -1.17)             |
|                             | (88.42, 198.00)  | (85.08, 191.99)  | -0.08)               |  | (1094.71, 2100.27) | (1077.80, 2067.14) | (-0.05, -0.01)     |        | (490.61, 590.39)  | (358.90, 461.36)       | (-1.35, -0.58) | <0.001 | (5.88, 6.79)  | (4.04, 4.98) | (-1.68, -0.66)     |
| Central Sub-Saharan Africa  | 187.37)          | 188.95)          | 0.03 (0.00, 0.025    |  | 2373.57)           | 2394.86)           | 0.03 (-0.00, 0.093 |        | 775.56)           | 566.87)                | -1.10)         | <0.001 | 8.99)         | 6.06)        | -1.43)             |
|                             | (105.01, 276.71) | (105.71, 290.15) | 0.06)                |  | (1637.61, 3236.98) | (1628.85, 3300.99) | 0.06)              |        | (555.30, 1047.55) | (411.67, 750.35)       | (-1.27, -0.93) | <0.001 | (6.14, 12.73) | (4.05, 8.63) | (-1.58, -1.27)     |
| Western Europe              | 35.05)           | 34.11)           | -0.10 (-0.13, <0.001 |  | 288.42)            | 276.29)            | -0.14)             | 0.125  | 267.75)           | 108.11 (96.97, 121.50) | -3.09)         | <0.001 | 3.33)         | 1.11)        | -3.73)             |
|                             | (25.10, 47.05)   | (24.36, 46.16)   | -0.07)               |  | (204.17, 404.43)   | (195.89, 380.12)   | (-0.31, 0.04)      |        | (251.67, 287.02)  |                        | (-3.62, -2.56) | <0.001 | (3.16, 3.52)  | (1.03, 1.20) | (-4.29, -3.16)     |
| High-income North America   | 42.25)           | 45.38)           | 0.24 (0.19, <0.001   |  | 445.02)            | 418.50)            | 0.01 (-0.82, 0.981 |        | 236.32)           | 186.10)                | -0.72)         | 0.001  | 2.67)         | 1.96)        | -0.99)             |
|                             | (31.79, 55.90)   | (35.58, 57.44)   | 0.29)                |  | (334.12, 600.71)   | (325.82, 521.57)   | 0.85)              |        | (217.35, 257.07)  | (167.22, 206.38)       | (-1.14, -0.30) |        | (2.54, 2.80)  | (1.84, 2.13) | (-1.45, -0.52)     |
| Central Asia                | 102.50)          | 107.39)          | 0.16 (0.15, <0.001   |  | 966.33)            | 1036.85)           | 0.25 (0.20, 0.29)  | <0.001 | 518.77)           | 450.24)                | -0.29)         | 0.120  | 6.30)         | 5.30)        | -0.36)             |
|                             | (69.86, 139.72)  | (71.81, 149.95)  | 0.17)                |  | (684.69, 1321.92)  | (722.32, 1427.83)  |                    |        | (479.62, 563.64)  | (380.67, 527.50)       | (-0.66, 0.08)  |        | (5.85, 6.78)  | (4.44, 6.30) | (-0.78, 0.06)      |
| Eastern Europe              | 41.19)           | 43.59)           | 0.21 (0.17, <0.001   |  | 263.88)            | 276.37)            | 0.19 (0.10, 0.27)  | <0.001 | 376.38)           | 348.58)                | 0.05)          | 0.941  | 4.79)         | 4.40)        | 0.06 (-1.37, 1.51) |
|                             | (30.81, 54.18)   | (33.17, 56.65)   | 0.26)                |  | (186.56, 372.29)   | (188.83, 399.82)   |                    |        | (358.87, 395.40)  | (300.15, 400.33)       | (-1.35, 1.48)  |        | (4.61, 4.96)  | (3.77, 5.10) |                    |
| Southern Sub-Saharan Africa | 178.18)          | 182.22)          | 0.08 (0.07, <0.001   |  | 2137.94)           | 2200.60)           | 0.10 (0.09, 0.12)  | <0.001 | 535.30)           | 538.55)                | 0.18)          | 0.143  | 5.72)         | 5.73)        | 0.21 (-0.14, 0.57) |
|                             | (105.59, 257.28) | (108.40, 261.05) | 0.09)                |  | (1506.27, 2916.74) | (1530.97, 3001.95) |                    |        | (430.45, 648.87)  | (411.91, 697.65)       | (-0.06, 0.43)  |        | (4.54, 7.19)  | (4.14, 7.95) |                    |
| High-income Asia Pacific    | 46.46)           | 47.23)           | 0.05 (-0.01, 0.078   |  | 288.19)            | 301.91)            | 0.17 (0.11, 0.24)  | <0.001 | 474.90)           | 113.04 (99.37, 128.19) | -4.82)         | <0.001 | 6.17)         | 1.09)        | -5.53)             |
|                             | (35.72, 61.22)   | (36.50, 62.34)   | 0.11)                |  | (195.78, 417.50)   | (205.69, 431.93)   |                    |        | (278.28, 550.65)  |                        | (-5.20, -4.44) | <0.001 | (3.49, 7.19)  | (1.01, 1.19) | (-5.87, -5.19)     |
| Central Europe              | 40.05)           | 40.21)           | 0.02 (-0.05, 0.602   |  | 481.31)            | 479.20)            | 0.02 (-0.09, 0.12) | 0.754  | 350.99)           | 199.04)                | -1.95)         | <0.001 | 4.27)         | 2.16)        | -2.35)             |
|                             | (30.49, 30.49)   | (30.76, 30.76)   | 0.09)                |  | (323.84, 323.84)   | (316.18, 316.18)   |                    |        | (327.06, 327.06)  | (169.59, 169.59)       | (-2.38, -2.38) |        | (4.03, 4.03)  | (1.81, 1.81) | (-2.79, -2.79)     |

|                        |                  |                  |                      |        |                    |                    |                    |        |                   |                       |                |                |               |                    |
|------------------------|------------------|------------------|----------------------|--------|--------------------|--------------------|--------------------|--------|-------------------|-----------------------|----------------|----------------|---------------|--------------------|
|                        | 53.02)           | 52.73)           |                      |        | 711.09)            | 708.67)            |                    |        | 379.81)           | 232.30)               | -1.52)         | 4.51)          | 2.57)         | -1.92)             |
| Andean Latin America   | 127.63)          | 122.77)          | -0.14 (-0.16, -0.12) | <0.001 | 1549.57)           | 1598.06)           | 0.11 (0.07, 0.15)  | <0.001 | 861.52)           | 515.21)               | -1.73)         | 10.85)         | 5.97)         | -2.01)             |
|                        | (85.02, 179.55)  | (78.70, 171.92)  |                      |        | (1112.52, 2112.98) | (1140.27, 2132.39) |                    |        | (698.44, 1057.91) | (402.95, 653.68)      | (-2.13, -1.33) | (8.69, 13.57)  | (4.49, 7.81)  | (-2.60, -1.41)     |
| Caribbean              | 120.59)          | 129.35)          | 0.24 (0.22, 0.27)    | <0.001 | 1358.72)           | 1427.97)           | 0.16 (0.14, 0.19)  | <0.001 | 511.06)           | 411.10)               | -0.63)         | 6.10)          | 4.65)         | -0.78)             |
|                        | (78.40, 168.87)  | (87.03, 180.84)  |                      |        | (997.77, 1821.17)  | (1036.69, 1918.44) |                    |        | (434.56, 601.93)  | (302.87, 542.28)      | (-0.86, -0.41) | (5.11, 7.33)   | (3.32, 6.42)  | (-1.06, -0.51)     |
| Southern Latin America | 78.38)           | 83.45)           | 0.21 (0.17, 0.25)    | <0.001 | 820.20)            | 897.25)            | 0.30 (0.21, 0.40)  | <0.001 | 508.89)           | 306.76)               | -1.77)         | 6.33)          | 3.45)         | -2.11)             |
|                        | (54.44, 106.02)  | (58.47, 115.12)  |                      |        | (572.80, 1118.65)  | (622.29, 1247.40)  |                    |        | (453.59, 572.21)  | (260.48, 359.78)      | (-2.12, -1.41) | (5.60, 7.13)   | (2.88, 4.08)  | (-2.52, -1.69)     |
| Oceania                | 86.67)           | 88.01)           | 0.06 (0.04, 0.08)    | <0.001 | 1043.02)           | 1089.06)           | 0.16 (0.11, 0.21)  | <0.001 | 1090.01)          | 1144.18)              | 0.10)          | 14.10)         | 14.84)        | 0.10 (-0.10, 0.30) |
|                        | (63.54, 117.71)  | (63.57, 122.41)  |                      |        | (763.46, 1383.20)  | (790.95, 1447.29)  |                    |        | (761.18, 1560.39) | (750.09, 1709.50)     | (-0.08, 0.28)  | (9.38, 20.64)  | (9.49, 22.58) |                    |
| Australasia            | 37.05)           | 38.45)           | 0.13 (0.12, 0.14)    | <0.001 | 177.36)            | 167.64)            | -0.18)             |        | 220.40)           | 90.91 (76.70, 107.30) | -3.03)         | 2.77)          | 0.98)         | -3.57)             |
|                        | (25.78, 50.38)   | (27.54, 51.98)   |                      |        | (120.26, 243.40)   | (111.44, 230.37)   | (-0.28, -0.09)     |        | (195.60, 248.57)  |                       | (-3.73, -2.32) | (2.44, 3.14)   | (0.81, 1.19)  | (-4.55, -2.58)     |
| <b>20-24 years</b>     |                  |                  |                      |        |                    |                    |                    |        |                   |                       |                |                |               |                    |
| <b>Women</b>           |                  |                  |                      |        |                    |                    |                    |        |                   |                       |                |                |               |                    |
| Global                 | 105.24)          | 116.25)          | 0.34 (0.28, 0.40)    | <0.001 | 1320.64)           | 1580.08)           | 0.63 (0.58, 0.68)  | <0.001 | 732.41)           | 537.20)               | -1.06)         | 9.37)          | 6.27)         | -1.38)             |
|                        | (78.17, 134.88)  | (84.13, 152.68)  |                      |        | (1061.06, 1620.29) | (1238.95, 1955.56) |                    |        | (667.00, 799.83)  | (475.67, 600.00)      | (-1.22, -0.90) | (8.43, 10.29)  | (5.49, 7.09)  | (-1.56, -1.19)     |
| <b>SDI category</b>    |                  |                  |                      |        |                    |                    |                    |        |                   |                       |                |                |               |                    |
| High                   | 67.72)           | 71.82)           | 0.20 (0.16, 0.24)    | <0.001 | 873.09)            | 857.32)            | 0.00 (-0.34, 0.34) | 0.993  | 311.34)           | 208.53)               | -1.37)         | 3.48)          | 1.91)         | -2.07)             |
|                        | (57.45, 79.03)   | (61.50, 83.21)   |                      |        | (676.41, 1137.83)  | (698.28, 1066.65)  |                    |        | (283.31, 344.25)  | (181.14, 239.32)      | (-1.63, -1.10) | (3.29, 3.67)   | (1.76, 2.10)  | (-2.39, -1.75)     |
| High-middle            | 71.11)           | 70.36)           | -0.03 (-0.05, -0.02) | <0.001 | 866.48)            | 945.97)            | 0.31 (0.26, 0.36)  | <0.001 | 503.61)           | 329.99)               | -1.43)         | 6.19)          | 3.55)         | -1.84)             |
|                        | (57.44, 87.68)   | (56.12, 87.84)   |                      |        | (718.21, 1039.56)  | (776.27, 1147.03)  |                    |        | (448.89, 566.59)  | (292.03, 371.78)      | (-1.92, -0.95) | (5.50, 7.01)   | (3.16, 3.96)  | (-2.33, -1.33)     |
| Middle                 | 98.98)           | 99.61)           | 0.03 (-0.08, 0.15)   | 0.596  | 1310.23)           | 1416.98)           | 0.28 (0.21, 0.35)  | <0.001 | 773.63)           | 526.86)               | -1.26)         | 9.91)          | 6.17)         | -1.58)             |
|                        | (72.11, 129.32)  | (72.42, 131.14)  |                      |        | (1044.39, 1607.65) | (1121.48, 1759.26) |                    |        | (692.07, 855.33)  | (465.80, 586.22)      | (-1.55, -0.96) | (8.82, 11.09)  | (5.40, 6.99)  | (-1.89, -1.26)     |
| Low-middle             | 150.51)          | 150.96)          | 0.01 (-0.04, 0.06)   | 0.577  | 1654.81)           | 1827.92)           | 0.36 (0.32, 0.40)  | <0.001 | 1060.86)          | 713.62)               | -1.37)         | 14.15)         | 8.80)         | -1.65)             |
|                        | (104.53, 150.51) | (104.01, 150.96) |                      |        | (1302.12, 1654.81) | (1404.89, 1827.92) |                    |        | (918.63, 1060.86) | (612.40, 713.62)      | (-1.83, -1.37) | (11.97, 14.15) | (7.45, 8.80)  | (-2.21, -1.65)     |
| 92                     |                  |                  |                      |        |                    |                    |                    |        |                   |                       |                |                |               |                    |

|                              |          |          |               |        |           |           |              |        |           |          |         |        |         |        |         |        |
|------------------------------|----------|----------|---------------|--------|-----------|-----------|--------------|--------|-----------|----------|---------|--------|---------|--------|---------|--------|
|                              | 201.47)  | 203.68)  |               |        | 2060.29)  | 2278.75)  |              |        | 1205.34)  | 826.26)  | -0.91)  | 16.23) | 10.47)  | -1.09) |         |        |
|                              | 154.64   | 154.64   |               |        | 2236.42   | 2415.73   |              |        | 921.16    | 641.18   | -1.23   | 11.65  | 7.28    | -1.60  |         |        |
| Low                          | (103.56, | (101.06, | 0.00 (-0.01,  | 0.786  | (1691.50, | (1807.87, | 0.29 (0.19,  | <0.001 | (788.50,  | (539.44, | (-1.41, | <0.001 | (9.71,  | (5.95, | (-1.80, | <0.001 |
|                              | 213.45)  | 216.98)  | 0.01)         |        | 2853.16)  | 3099.54)  | 0.39)        |        | 1068.98)  | 761.52)  | -1.05)  | 13.68) | 8.79)   | -1.40) |         |        |
| <b>21 GBD region</b>         |          |          |               |        |           |           |              |        |           |          |         |        |         |        |         |        |
|                              | 165.70   | 159.59   |               |        | 1566.28   | 1609.02   |              |        | 1186.28   | 756.24   | -1.63   | 16.16  | 9.64    | -1.89  |         |        |
| South Asia                   | (114.07, | (110.31, | -0.13 (-0.19, | <0.001 | (1208.96, | (1239.44, | 0.11 (0.06,  | <0.001 | (1004.94, | (632.21, | (-2.22, | <0.001 | (13.39, | (7.84, | (-2.56, | <0.001 |
|                              | 220.63)  | 212.58)  | -0.06)        |        | 1943.16)  | 2015.07)  | 0.16)        |        | 1371.20)  | 902.50)  | -1.04)  | 18.86) | 11.78)  | -1.21) |         |        |
|                              | 81.35    | 71.20    |               |        | 1001.36   | 916.73    |              |        | 593.46    | 326.65   | -1.86   | 7.31   | 3.39    | -2.38  |         |        |
| East Asia                    | (59.00,  | (51.78,  | -0.47 (-0.53, | <0.001 | (783.19,  | (724.41,  | (-0.45,      | 0.006  | (484.57,  | (269.47, | (-2.29, | <0.001 | (5.76,  | (2.65, | (-2.89, | <0.001 |
|                              | 107.35)  | 93.03)   | -0.40)        |        | 1253.92)  | 1129.80)  | -0.07)       |        | 729.43)   | 389.00)  | -1.44)  | 9.37)  | 4.19)   | -1.87) |         |        |
|                              | 94.82    | 97.29    |               |        | 1404.96   | 1490.40   |              |        | 1124.33   | 716.87   | -1.51   | 15.19  | 8.98    | -1.77  |         |        |
| North Africa and Middle East | (72.65,  | (73.35,  | 0.09 (0.08,   | <0.001 | (1112.79, | (1171.59, | 0.22 (0.14,  | <0.001 | (986.01,  | (584.75, | (-1.73, | <0.001 | (13.19, | (7.04, | (-2.02, | <0.001 |
|                              | 119.97)  | 124.01)  | 0.11)         |        | 1776.59)  | 1885.43)  | 0.31)        |        | 1280.13)  | 874.54)  | -1.28)  | 17.43) | 11.35)  | -1.51) |         |        |
|                              | 127.60   | 130.88   |               |        | 2453.10   | 2671.63   |              |        | 686.02    | 533.79   | -0.86   | 7.93   | 5.45    | -1.27  |         |        |
| Western Sub-Saharan Africa   | (83.60,  | (85.44,  | 0.10 (0.06,   | <0.001 | (1773.96, | (1929.59, | 0.30 (0.28,  | <0.001 | (541.71,  | (412.28, | (-0.97, | <0.001 | (5.96,  | (3.97, | (-1.42, | <0.001 |
|                              | 179.70)  | 185.15)  | 0.14)         |        | 3295.29)  | 3610.09)  | 0.33)        |        | 857.09)   | 677.99)  | -0.75)  | 10.25) | 7.43)   | -1.13) |         |        |
|                              | 77.85    | 77.41    |               |        | 926.92    | 975.16    |              |        | 760.00    | 558.13   | -1.06   | 9.81   | 6.74    | -1.28  |         |        |
| Southeast Asia               | (59.48,  | (59.17,  | -0.02 (-0.07, | 0.525  | (764.13,  | (798.74,  | 0.19 (0.11,  | <0.001 | (630.24,  | (467.63, | (-1.21, | <0.001 | (7.82,  | (5.55, | (-1.44, | <0.001 |
|                              | 99.82)   | 98.03)   | 0.03)         |        | 1118.44)  | 1181.03)  | 0.27)        |        | 890.36)   | 643.50)  | -0.91)  | 11.63) | 8.03)   | -1.11) |         |        |
|                              | 165.13   | 165.05   |               |        | 2920.92   | 3174.21   |              |        | 819.64    | 549.45   | -1.36   | 9.53   | 5.25    | -2.02  |         |        |
| Eastern Sub-Saharan Africa   | (104.59, | (101.08, | -0.01 (-0.02, | 0.428  | (2170.77, | (2362.07, | 0.31 (0.19,  | <0.001 | (672.51,  | (439.72, | (-1.48, | <0.001 | (7.46,  | (4.03, | (-2.15, | <0.001 |
|                              | 239.97)  | 240.42)  | 0.01)         |        | 3728.62)  | 4083.06)  | 0.43)        |        | 999.72)   | 665.73)  | -1.23)  | 11.85) | 6.59)   | -1.88) |         |        |
|                              | 87.33    | 83.92    |               |        | 1351.14   | 1380.46   |              |        | 538.73    | 357.23   | -1.44   | 6.75   | 4.02    | -1.48  |         |        |
| Central Latin America        | (67.10,  | (62.53,  | -0.13 (-0.16, | <0.001 | (1105.17, | (1124.16, | 0.08 (-0.04, | 0.172  | (500.32,  | (300.05, | (-2.12, | <0.001 | (6.40,  | (3.27, | (-1.99, | <0.001 |
|                              | 109.65)  | 107.48)  | -0.10)        |        | 1639.83)  | 1683.11)  | 0.20)        |        | 580.47)   | 424.49)  | -0.75)  | 7.11)  | 4.88)   | -0.96) |         |        |
|                              | 141.26   | 133.31   |               |        | 2243.35   | 2272.32   |              |        | 687.08    | 415.43   | -1.66   | 8.33   | 4.25    | -2.21  |         |        |
| Tropical Latin America       | (96.28,  | (89.13,  | -0.20 (-0.26, | <0.001 | (1748.60, | (1746.21, | 0.05 (0.01,  | 0.005  | (631.62,  | (364.59, | (-2.14, | <0.001 | (7.81,  | (3.92, | (-2.75, | <0.001 |
|                              | 191.44)  | 186.27)  | -0.13)        |        | 2786.87)  | 2831.38)  | 0.09)        |        | 746.88)   | 478.44)  | -1.17)  | 8.87)  | 4.58)   | -1.66) |         |        |
|                              | 159.42   | 158.19   |               |        | 2889.06   | 2967.08   |              |        | 692.64    | 515.72   | -1.04   | 7.79   | 5.05    | -1.51  |         |        |
| Central Sub-Saharan Africa   | (98.54,  | (95.18,  | -0.01 (-0.05, | 0.409  | (2087.93, | (2175.29, | 0.11 (0.05,  | <0.001 | (496.25,  | (389.02, | (-1.11, | <0.001 | (5.03,  | (3.39, | (-1.60, | <0.001 |
|                              | 232.54)  | 232.45)  | 0.02)         |        | 3815.86)  | 3864.57)  | 0.16)        |        | 928.11)   | 668.17)  | -0.96)  | 10.96) | 7.12)   | -1.41) |         |        |
| 93                           |          |          |               |        |           |           |              |        |           |          |         |        |         |        |         |        |

|                             |          |          |               |        |           |           |              |        |          |          |         |        |         |         |              |        |
|-----------------------------|----------|----------|---------------|--------|-----------|-----------|--------------|--------|----------|----------|---------|--------|---------|---------|--------------|--------|
|                             | 54.14    | 52.50    |               |        | 750.00    | 725.92    | -0.11        |        | 267.03   | 144.77   | -2.08   | 3.03   | 1.23    | -3.05   |              |        |
| Western Europe              | (43.90,  | (42.08,  | -0.10 (-0.13, | <0.001 | (560.53,  | (554.78,  | (-0.24,      | 0.125  | (242.58, | (124.37, | (-2.39, | <0.001 | (2.88,  | (1.14,  | (-3.39,      | <0.001 |
|                             | 65.79)   | 63.89)   | -0.07)        |        | 983.87)   | 946.36)   | 0.03)        |        | 296.11)  | 170.38)  | -1.77)  |        | 3.19)   | 1.33)   | -2.70)       |        |
| High-income North America   | 89.52    | 97.37    |               |        | 1177.61   | 1066.73   | -0.29        |        | 288.51   | 247.22   | -0.48   | 2.88   | 2.27    | -0.93   |              |        |
|                             | (78.30,  | (85.82,  | 0.29 (0.25,   | <0.001 | (879.15,  | (863.00,  | (-0.56,      | 0.031  | (255.54, | (215.43, | (-0.68, | <0.001 | (2.76,  | (2.11,  | (-1.44,      | <0.001 |
|                             | 102.37)  | 110.00)  | 0.34)         |        | 1597.62)  | 1334.34)  | -0.03)       |        | 329.99)  | 283.29)  | -0.28)  |        | 2.99)   | 2.43)   | -0.42)       |        |
| Central Asia                | 115.29   | 114.81   |               |        | 1351.39   | 1402.25   |              |        | 884.11   | 666.21   | -1.06   | 11.61  | 8.33    | -1.28   |              |        |
|                             | (86.45,  | (83.85,  | -0.01 (-0.03, | 0.186  | (1069.62, | (1103.55, | 0.15 (0.05,  | 0.003  | (822.32, | (576.76, | (-1.43, | <0.001 | (10.93, | (7.04,  | (-1.69,      | <0.001 |
|                             | 150.49)  | 150.77)  | 0.00)         |        | 1658.47)  | 1763.69)  | 0.24)        |        | 946.21)  | 767.07)  | -0.70)  |        | 12.35)  | 9.69)   | -0.86)       |        |
| Eastern Europe              | 63.17    | 68.27    |               |        | 544.76    | 617.69    |              |        | 380.77   | 406.23   | 0.10    | 4.52   | 4.73    | -0.02   |              |        |
|                             | (51.73,  | (56.04,  | 0.28 (0.22,   | <0.001 | (447.38,  | (511.31,  | 0.44 (0.26,  | <0.001 | (349.08, | (345.56, | (-0.79, | 0.835  | (4.24,  | (3.93,  | (-1.10,      | 0.965  |
|                             | 76.10)   | 82.13)   | 0.34)         |        | 662.42)   | 746.42)   | 0.62)        |        | 414.21)  | 476.89)  | 0.99)   |        | 4.75)   | 5.71)   | 1.07)        |        |
| Southern Sub-Saharan Africa | 164.78   | 161.10   |               |        | 2699.79   | 2695.18   |              |        | 791.22   | 465.68   | -1.73   | 9.25   | 4.39    | -2.45   |              |        |
|                             | (105.29, | (101.64, | -0.08 (-0.09, | <0.001 | (2067.37, | (2071.36, | 0.00 (-0.07, | 0.926  | (666.98, | (347.27, | (-2.70, | 0.001  | (7.64,  | (2.94,  | (-3.87,      | 0.001  |
|                             | 235.71)  | 234.38)  | -0.06)        |        | 3420.01)  | 3405.34)  | 0.07)        |        | 915.28)  | 601.55)  | -0.76)  |        | 10.85)  | 6.14)   | -1.01)       |        |
| High-income Asia Pacific    | 69.31    | 66.95    |               |        | 615.97    | 621.78    |              |        | 360.22   | 131.28   | -3.46   | 4.47   | 1.03    | -5.06   |              |        |
|                             | (59.45,  | (57.59,  | -0.11 (-0.17, | <0.001 | (485.90,  | (494.75,  | 0.06 (-0.14, | 0.566  | (319.30, | (109.83, | (-3.72, | <0.001 | (3.95,  | (0.93,  | (-5.50,      | <0.001 |
|                             | 80.02)   | 77.34)   | -0.06)        |        | 792.13)   | 787.73)   | 0.25)        |        | 401.88)  | 155.89)  | -3.19)  |        | 5.00)   | 1.14)   | -4.62)       |        |
| Central Europe              | 55.78    | 56.73    |               |        | 938.38    | 968.41    |              |        | 417.97   | 248.95   | -1.83   | 4.76   | 2.19    | -2.81   |              |        |
|                             | (46.09,  | (46.73,  | 0.07 (0.00,   | 0.041  | (721.90,  | (745.75,  | 0.13 (-0.04, | 0.136  | (382.05, | (205.41, | (-2.00, | <0.001 | (4.53,  | (1.80,  | (-3.27,      | <0.001 |
|                             | 67.28)   | 68.30)   | 0.14)         |        | 1202.72)  | 1254.76)  | 0.30)        |        | 456.76)  | 294.88)  | -1.66)  |        | 4.99)   | 2.65)   | -2.34)       |        |
| Andean Latin America        | 130.34   | 123.59   |               |        | 1929.08   | 1982.99   |              |        | 900.30   | 459.52   | -2.27   | 11.80  | 5.15    | -2.80   |              |        |
|                             | (89.84,  | (83.39,  | -0.18 (-0.19, | <0.001 | (1486.90, | (1525.83, | 0.09 (0.04,  | <0.001 | (752.24, | (356.27, | (-2.98, | <0.001 | (9.76,  | (3.81,  | (-3.69,      | <0.001 |
|                             | 176.68)  | 171.16)  | -0.17)        |        | 2423.41)  | 2516.37)  | 0.14)        |        | 1069.05) | 572.54)  | -1.56)  |        | 14.35)  | 6.72)   | -1.90)       |        |
| Caribbean                   | 154.22   | 164.44   |               |        | 1824.93   | 1918.51   |              |        | 896.01   | 824.03   | -0.26   | 11.87  | 10.72   | -0.32   |              |        |
|                             | (113.22, | (117.03, | 0.23 (0.21,   | <0.001 | (1436.53, | (1508.88, | 0.19 (0.14,  | <0.001 | (708.65, | (573.98, | (-0.52, | 0.048  | (9.25,  | (7.14,  | (-0.62,      | 0.032  |
|                             | 200.42)  | 218.85)  | 0.25)         |        | 2281.85)  | 2406.91)  | 0.23)        |        | 1088.83) | 1136.10) | -0.00)  |        | 14.72)  | 15.33)  | -0.03)       |        |
| Southern Latin America      | 76.26    | 78.55    |               |        | 1234.20   | 1332.74   |              |        | 565.91   | 314.46   | -1.97   | 7.09   | 3.27    | -2.59   |              |        |
|                             | (56.39,  | (57.75,  | 0.10 (0.09,   | <0.001 | (945.98,  | (1027.82, | 0.25 (0.19,  | <0.001 | (507.39, | (268.26, | (-2.42, | <0.001 | (6.32,  | (2.82,  | (-3.14,      | <0.001 |
|                             | 99.79)   | 102.85)  | 0.11)         |        | 1594.74)  | 1694.51)  | 0.32)        |        | 630.77)  | 365.65)  | -1.52)  |        | 7.86)   | 3.80)   | -2.04)       |        |
| Oceania                     | 112.38   | 117.70   |               |        | 1155.97   | 1219.06   |              |        | 1138.05  | 1171.45  | 0.06    | 15.30  | 15.77   |         |              |        |
|                             | (85.22,  | (87.69,  | 0.16 (0.14,   | <0.001 | (895.99,  | (933.38,  | 0.20 (0.08,  | 0.002  | (787.87, | (804.73, | (-0.12, | 0.550  | (10.06, | (10.35, | 0.05 (-0.15, | 0.601  |
|                             | 146.70)  | 156.45)  | 0.18)         |        | 1466.04)  | 1559.55)  | 0.33)        |        | 1597.05) | 1644.35) | 0.23)   |        | 22.43)  | 22.92)  | 0.25)        |        |

|                              |         |         |               |        |           |           |              |        |          |                |         |        |         |         |         |        |
|------------------------------|---------|---------|---------------|--------|-----------|-----------|--------------|--------|----------|----------------|---------|--------|---------|---------|---------|--------|
|                              | 44.15   | 44.71   |               |        | 453.21    | 447.85    | -0.06        |        | 223.19   |                |         | 2.54   | 1.05    | -3.04   |         |        |
| Australasia                  | (34.43, | (35.20, | 0.04 (0.01,   | 0.003  | (336.84,  | (340.30,  | (-0.20,      | 0.435  | (193.17, | 123.22 (98.66, | (-3.03, | <0.001 | (2.20,  | (0.85,  | (-4.28, | <0.001 |
|                              | 55.06)  | 55.29)  | 0.06)         |        | 588.42)   | 585.32)   | 0.08)        |        | 256.41)  | 151.18)        | -0.98)  |        | 2.92)   | 1.26)   | -1.79)  |        |
| <b>Men</b>                   |         |         |               |        |           |           |              |        |          |                |         |        |         |         |         |        |
|                              | 99.54   | 107.85  |               |        | 1002.68   | 1197.80   |              |        | 833.09   | 734.24         | -0.43   |        | 11.36   | 9.75    | -0.50   |        |
| Global                       | (76.46, | (80.55, | 0.28 (0.21,   | <0.001 | (795.92,  | (937.44,  | 0.62 (0.58,  | <0.001 | (761.19, | (654.48,       | (-0.56, | <0.001 | (10.36, | (8.71,  | (-0.63, | <0.001 |
|                              | 126.86) | 139.49) | 0.36)         |        | 1240.91)  | 1497.27)  | 0.67)        |        | 903.54)  | 821.20)        | -0.30)  |        | 12.27)  | 11.04)  | -0.36)  |        |
| <b>SDI category</b>          |         |         |               |        |           |           |              |        |          |                |         |        |         |         |         |        |
|                              | 69.38   | 71.82   |               |        | 478.95    | 507.56    |              |        | 398.18   | 257.61         | -1.50   |        | 5.26    | 3.11    | -1.75   |        |
| High                         | (56.86, | (60.06, | 0.11 (0.07,   | <0.001 | (385.88,  | (423.06,  | 0.30 (-0.08, | 0.121  | (371.82, | (235.63,       | (-1.75, | <0.001 | (4.94,  | (2.90,  | (-1.88, | <0.001 |
|                              | 84.53)  | 85.59)  | 0.15)         |        | 600.28)   | 611.71)   | 0.69)        |        | 423.33)  | 280.97)        | -1.25)  |        | 5.53)   | 3.37)   | -1.62)  |        |
|                              | 76.49   | 74.50   |               |        | 646.21    | 676.23    |              |        | 747.08   | 547.46         | -1.21   |        | 10.29   | 7.32    | -1.35   |        |
| High-middle                  | (61.85, | (59.99, | -0.09 (-0.13, | <0.001 | (521.39,  | (545.36,  | 0.17 (0.12,  | <0.001 | (662.83, | (489.10,       | (-1.64, | <0.001 | (9.04,  | (6.47,  | (-1.84, | <0.001 |
|                              | 94.21)  | 91.82)  | -0.04)        |        | 785.97)   | 831.32)   | 0.22)        |        | 839.82)  | 609.58)        | -0.78)  |        | 11.60)  | 8.21)   | -0.86)  |        |
|                              | 100.13  | 100.30  |               |        | 1084.20   | 1146.63   |              |        | 875.04   | 800.59         | -0.28   |        | 11.88   | 10.75   | -0.32   |        |
| Middle                       | (75.01, | (75.14, | 0.01 (-0.04,  | 0.593  | (844.84,  | (899.96,  | 0.20 (0.17,  | <0.001 | (779.60, | (699.32,       | (-0.45, | 0.001  | (10.52, | (9.30,  | (-0.50, | 0.001  |
|                              | 129.87) | 128.69) | 0.06)         |        | 1355.33)  | 1441.23)  | 0.24)        |        | 968.92)  | 904.80)        | -0.11)  |        | 13.15)  | 12.28)  | -0.14)  |        |
|                              | 121.97  | 126.40  |               |        | 1217.81   | 1354.88   |              |        | 1055.43  | 868.78         | -0.65   |        | 14.58   | 11.69   | -0.74   |        |
| Low-middle                   | (88.11, | (90.21, | 0.15 (-0.03,  | 0.103  | (943.52,  | (1032.77, | 0.39 (0.33,  | <0.001 | (930.18, | (744.17,       | (-1.08, | 0.004  | (12.76, | (9.94,  | (-1.23, | 0.003  |
|                              | 162.03) | 168.79) | 0.33)         |        | 1537.45)  | 1717.05)  | 0.46)        |        | 1184.89) | 1010.44)       | -0.21)  |        | 16.45)  | 13.82)  | -0.26)  |        |
|                              | 143.45  | 144.93  |               |        | 1789.36   | 1946.77   |              |        | 992.67   | 868.30         | -0.46   |        | 13.25   | 11.26   | -0.57   |        |
| Low                          | (98.66, | (97.41, | 0.05 (0.01,   | 0.026  | (1348.37, | (1458.59, | 0.30 (0.23,  | <0.001 | (842.15, | (730.05,       | (-0.66, | <0.001 | (11.11, | (9.40,  | (-0.80, | <0.001 |
|                              | 197.24) | 200.12) | 0.10)         |        | 2278.80)  | 2502.73)  | 0.37)        |        | 1137.89) | 1021.03)       | -0.27)  |        | 15.45)  | 13.53)  | -0.35)  |        |
| <b>21 GBD region</b>         |         |         |               |        |           |           |              |        |          |                |         |        |         |         |         |        |
|                              | 124.41  | 125.20  |               |        | 1083.75   | 1121.55   |              |        | 1141.42  | 916.60         | -0.76   |        | 16.00   | 12.60   | -0.83   |        |
| South Asia                   | (88.51, | (89.51, | 0.04 (-0.02,  | 0.172  | (826.81,  | (848.94,  | 0.15 (-0.01, | 0.068  | (990.05, | (769.01,       | (-1.36, | 0.015  | (13.75, | (10.53, | (-1.49, | 0.014  |
|                              | 165.39) | 166.43) | 0.10)         |        | 1369.45)  | 1426.95)  | 0.31)        |        | 1295.06) | 1088.78)       | -0.14)  |        | 18.25)  | 15.20)  | -0.17)  |        |
|                              | 89.77   | 80.08   |               |        | 856.41    | 731.81    |              |        | 793.36   | 608.30         | -0.79   |        | 10.76   | 8.12    | -0.85   |        |
| East Asia                    | (67.03, | (60.78, | -0.39 (-0.45, | <0.001 | (657.83,  | (562.91,  | (-0.63,      | <0.001 | (630.88, | (493.49,       | (-1.40, | 0.011  | (8.42,  | (6.37,  | (-1.50, | 0.010  |
|                              | 116.83) | 103.57) | -0.33)        |        | 1086.12)  | 917.36)   | -0.43)       |        | 937.53)  | 728.02)        | -0.18)  |        | 12.86)  | 9.88)   | -0.20)  |        |
|                              | 97.13   | 101.59  |               |        | 1190.72   | 1271.18   |              |        | 1131.21  | 912.96         | -0.70   |        | 15.66   | 12.31   | -0.79   |        |
| North Africa and Middle East | (76.05, | (78.66, | 0.16 (0.10,   | <0.001 | (929.21,  | (986.08,  | 0.24 (0.18,  | <0.001 | (972.87, | (726.44,       | (-0.91, | <0.001 | (13.29, | (9.45,  | (-1.01, | <0.001 |
|                              | 122.16) | 128.22) | 0.23)         |        | 1522.57)  | 1639.79)  | 0.31)        |        | 1302.37) | 1137.71)       | -0.49)  |        | 18.27)  | 15.70)  | -0.56)  |        |

|                     |          |          |               |        |           |           |              |        |          |          |         |        |         |         |              |        |
|---------------------|----------|----------|---------------|--------|-----------|-----------|--------------|--------|----------|----------|---------|--------|---------|---------|--------------|--------|
| Western             | 133.75   | 137.08   | 0.08 (0.08,   |        | 2256.01   | 2398.17   | 0.22 (0.19,  |        | 765.94   | 691.95   | -0.35   |        | 9.46    | 8.22    | -0.49        |        |
| Sub-Saharan Africa  | (91.08,  | (93.20,  | 0.09)         | <0.001 | (1597.33, | (1704.77, | 0.25)        | <0.001 | (606.55, | (538.69, | (-0.43, | <0.001 | (7.22,  | (5.98,  | (-0.59,      | <0.001 |
|                     | 184.60)  | 189.78)  |               |        | 3064.96)  | 3282.86)  |              |        | 963.79)  | 881.34)  | -0.27)  |        | 12.39)  | 10.92)  | -0.40)       |        |
|                     | 79.26    | 79.35    | 0.01 (-0.02,  |        | 802.95    | 842.43    | 0.17 (0.13,  |        | 843.13   | 893.55   | 0.26    |        | 11.43   | 12.16   | 0.28 (0.01,  |        |
| Southeast Asia      | (64.23,  | (64.15,  | 0.03)         | 0.537  | (650.63,  | (672.55,  | 0.21)        | <0.001 | (724.34, | (730.19, | (0.01,  | 0.045  | (9.67,  | (9.53,  | 0.55)        | 0.045  |
|                     | 99.24)   | 99.53)   |               |        | 988.58)   | 1051.78)  |              |        | 981.23)  | 1031.37) | 0.51)   |        | 13.42)  | 14.30)  |              |        |
|                     | 165.48   | 162.87   | -0.05 (-0.06, |        | 2336.75   | 2534.49   | 0.30 (0.24,  |        | 1049.30  | 848.42   | -0.72   |        | 13.69   | 10.51   | -0.90        |        |
| Eastern Sub-Saharan | (109.93, | (106.31, | -0.04)        | <0.001 | (1737.25, | (1882.88, | 0.36)        | <0.001 | (858.82, | (694.75, | (-0.88, | <0.001 | (10.95, | (8.37,  | (-1.08,      | <0.001 |
| Africa              | 233.56)  | 232.76)  |               |        | 3002.47)  | 3276.00)  |              |        | 1237.56) | 1022.05) | -0.55)  |        | 16.49)  | 13.14)  | -0.72)       |        |
|                     | 76.92    | 79.19    | 0.10 (0.07,   |        | 906.02    | 968.00    | 0.24 (0.19,  |        | 584.02   | 469.33   | -0.72   |        | 7.94    | 6.17    | -0.70        |        |
| Central Latin       | (59.30,  | (60.43,  | 0.14)         | <0.001 | (737.13,  | (781.75,  | 0.29)        | <0.001 | (544.19, | (406.17, | (-1.21, | 0.004  | (7.46,  | (5.26,  | (-1.04,      | <0.001 |
| America             | 97.49)   | 101.16)  |               |        | 1105.49)  | 1181.93)  |              |        | 623.04)  | 539.78)  | -0.23)  |        | 8.45)   | 7.23)   | -0.35)       |        |
|                     | 133.57   | 127.76   | -0.15 (-0.18, |        | 1710.20   | 1679.75   | -0.06        |        | 776.78   | 552.63   | -1.19   |        | 10.22   | 6.88    | -1.38        |        |
| Tropical Latin      | (93.47,  | (87.84,  | -0.13)        | <0.001 | (1311.98, | (1293.60, | (-0.08,      | <0.001 | (719.81, | (501.07, | (-1.50, | <0.001 | (9.46,  | (6.35,  | (-1.81,      | <0.001 |
| America             | 180.40)  | 175.56)  |               |        | 2161.69)  | 2123.85)  | -0.03)       |        | 838.78)  | 611.02)  | -0.87)  |        | 10.92)  | 7.52)   | -0.95)       |        |
|                     | 159.81   | 158.49   | -0.03 (-0.05, |        | 2474.49   | 2500.16   | 0.04 (0.01,  |        | 862.87   | 715.57   | -0.71   |        | 10.86   | 8.63    | -0.87        |        |
| Central Sub-Saharan | (103.04, | (99.72,  | -0.01)        | 0.004  | (1817.37, | (1834.44, | 0.07)        | 0.009  | (614.94, | (520.14, | (-0.84, | <0.001 | (7.31,  | (5.81,  | (-1.02,      | <0.001 |
| Africa              | 231.35)  | 232.82)  |               |        | 3229.86)  | 3279.96)  |              |        | 1181.38) | 973.95)  | -0.58)  |        | 15.84)  | 12.32)  | -0.72)       |        |
|                     | 58.70    | 56.01    | -0.17 (-0.19, |        | 364.78    | 353.46    | -0.11        |        | 413.36   | 176.48   | -3.00   |        | 5.64    | 2.12    | -3.46        |        |
| Western Europe      | (46.55,  | (44.26,  | -0.14)        | <0.001 | (276.89,  | (268.65,  | (-0.16,      | <0.001 | (388.32, | (161.26, | (-3.27, | <0.001 | (5.35,  | (1.98,  | (-3.75,      | <0.001 |
|                     | 72.83)   | 70.10)   |               |        | 473.96)   | 465.16)   | -0.06)       |        | 438.34)  | 193.85)  | -2.74)  |        | 5.95)   | 2.27)   | -3.18)       |        |
|                     | 78.43    | 85.37    | 0.30 (0.23,   |        | 674.47    | 676.79    | 0.08 (-0.23, |        | 349.14   | 327.24   | -0.20   |        | 4.33    | 3.96    | -0.30        |        |
| High-income North   | (64.89,  | (73.37,  | 0.36)         | <0.001 | (528.40,  | (563.46,  | 0.39)        | 0.628  | (325.11, | (297.82, | (-0.62, | 0.352  | (4.16,  | (3.66,  | (-0.87,      | 0.298  |
| America             | 94.60)   | 99.00)   |               |        | 875.80)   | 815.35)   |              |        | 374.48)  | 355.46)  | 0.22)   |        | 4.53)   | 4.23)   | 0.27)        |        |
|                     | 119.18   | 121.36   | 0.06 (0.05,   |        | 1092.79   | 1169.73   | 0.23 (0.20,  |        | 844.66   | 856.18   | -0.03   |        | 11.50   | 11.64   | -0.05        |        |
| Central Asia        | (90.74,  | (90.16,  | 0.08)         | <0.001 | (838.63,  | (878.70,  | 0.27)        | <0.001 | (787.45, | (749.42, | (-0.73, | 0.923  | (10.76, | (10.15, | (-0.81,      | 0.889  |
|                     | 152.84)  | 157.32)  |               |        | 1388.48)  | 1497.69)  |              |        | 907.14)  | 975.93)  | 0.67)   |        | 12.38)  | 13.33)  | 0.71)        |        |
|                     | 71.57    | 79.47    | 0.37 (0.35,   |        | 290.37    | 309.76    | 0.25 (0.04,  |        | 719.63   | 926.35   | 1.02    |        | 10.22   | 13.36   | 1.07 (-0.00, |        |
| Eastern Europe      | (58.30,  | (66.18,  | 0.39)         | <0.001 | (236.59,  | (255.26,  | 0.46)        | 0.018  | (687.21, | (799.16, | (-0.01, | 0.052  | (9.77,  | (11.54, | 2.16)        | 0.050  |
|                     | 87.13)   | 94.67)   |               |        | 352.02)   | 374.77)   |              |        | 750.66)  | 1059.70) | 2.06)   |        | 10.61)  | 15.38)  |              |        |
|                     | 162.13   | 162.98   | 0.03 (-0.01,  |        | 2245.98   | 2299.10   | 0.09 (0.06,  |        | 596.52   | 622.75   | 0.12    |        | 6.94    | 7.29    | 0.13 (-0.65, |        |
| Southern            | (110.52, | (109.05, | 0.07)         | 0.162  | (1695.62, | (1738.14, | 0.11)        | <0.001 | (494.14, | (499.88, | (-0.50, | 0.712  | (5.57,  | (5.67,  | 0.91)        | 0.748  |
| Sub-Saharan Africa  | 221.43)  | 227.01)  |               |        | 2883.25)  | 2967.52)  |              |        | 724.36)  | 775.91)  | 0.74)   |        | 8.78)   | 9.61)   |              |        |



|                          | 2019             | 2020             | Change (2020-2019)   | SDI    | 2019               | 2020               | Change (2020-2019)  | 2019   | 2020               | Change (2020-2019) | SDI   | 2019           | 2020           | Change (2020-2019) |
|--------------------------|------------------|------------------|----------------------|--------|--------------------|--------------------|---------------------|--------|--------------------|--------------------|-------|----------------|----------------|--------------------|
| High-income Asia Pacific | 79.32            | 80.73            | 0.05 (-0.01, 0.12)   | 0.116  | 384.39             | 403.53             | 0.19 (0.04, 0.34)   | 0.015  | 460.86             | 175.15             | -3.26 | 6.33           | 2.03           | -3.77              |
|                          | (66.13, 95.60)   | (68.23, 96.92)   |                      |        | (307.00, 486.96)   | (323.68, 505.45)   |                     |        | (376.61, 511.15)   | (158.73, 194.34)   |       | (-3.64, -2.88) | (5.05, 7.02)   | (1.89, 2.22)       |
| Central Europe           | 64.57            | 66.79            | 0.12 (0.05, 0.19)    | 0.001  | 521.24             | 530.45             | 0.08 (-0.10, 0.26)  | 0.382  | 599.34             | 337.67             | -2.06 | 8.21           | 4.31           | -2.36              |
|                          | (52.47, 78.68)   | (54.91, 81.04)   |                      |        | (387.51, 691.85)   | (392.98, 716.06)   |                     |        | (567.73, 634.43)   | (292.62, 386.81)   |       | (-2.45, -1.68) | (7.80, 8.64)   | (3.68, 5.00)       |
| Andean Latin America     | 123.78           | 118.90           | -0.15 (-0.18, -0.12) | <0.001 | 1671.73            | 1688.54            | 0.04 (-0.00, 0.08)  | 0.082  | 1118.72            | 736.73             | -1.26 | 15.38          | 9.63           | -1.42              |
|                          | (87.23, 167.82)  | (81.49, 161.59)  |                      |        | (1289.01, 2138.44) | (1300.59, 2148.31) |                     |        | (902.26, 1358.59)  | (558.34, 942.36)   |       | (-1.72, -0.80) | (12.30, 18.88) | (7.06, 12.71)      |
| Caribbean                | 137.08           | 146.14           | 0.22 (0.20, 0.24)    | <0.001 | 1537.18            | 1605.53            | 0.15 (0.12, 0.18)   | <0.001 | 733.28             | 619.71             | -0.47 | 9.74           | 7.98           | -0.65              |
|                          | (100.02, 181.18) | (107.24, 194.91) |                      |        | (1203.34, 1937.72) | (1258.79, 2017.04) |                     |        | (638.19, 847.59)   | (462.01, 836.26)   |       | (-0.73, -0.20) | (8.40, 11.32)  | (5.66, 11.23)      |
| Southern Latin America   | 82.84            | 87.33            | 0.17 (0.13, 0.21)    | <0.001 | 919.09             | 981.81             | 0.22 (0.10, 0.34)   | <0.001 | 711.76             | 398.45             | -2.02 | 9.70           | 4.96           | -2.32              |
|                          | (62.49, 106.77)  | (65.15, 113.94)  |                      |        | (692.54, 1179.27)  | (737.56, 1268.94)  |                     |        | (637.92, 791.79)   | (340.05, 462.35)   |       | (-2.52, -1.51) | (8.63, 10.85)  | (4.20, 5.81)       |
| Oceania                  | 109.20           | 110.76           | 0.05 (0.04, 0.06)    | <0.001 | 1121.09            | 1162.70            | 0.14 (0.06, 0.21)   | <0.001 | 1753.25            | 1745.30            | -0.07 | 24.84          | 24.72          | -0.08              |
|                          | (84.64, 139.68)  | (85.66, 142.57)  |                      |        | (883.54, 1408.12)  | (899.95, 1461.83)  |                     |        | (1204.88, 2526.70) | (1130.37, 2479.87) |       | (-0.32, 0.17)  | (16.55, 36.61) | (15.43, 35.56)     |
| Australasia              | 74.64            | 77.81            | 0.14 (0.12, 0.16)    | <0.001 | 283.54             | 299.41             | 0.17 (0.13, 0.22)   | <0.001 | 333.25             | 158.15             | -2.47 | 4.53           | 1.94           | -2.86              |
|                          | (58.86, 92.48)   | (61.51, 94.35)   |                      |        | (204.96, 371.73)   | (222.05, 394.41)   |                     |        | (294.88, 375.20)   | (132.06, 187.08)   |       | (-2.98, -1.97) | (3.97, 5.13)   | (1.58, 2.35)       |
| <b>25-29 years</b>       |                  |                  |                      |        |                    |                    |                     |        |                    |                    |       |                |                |                    |
| <b>Women</b>             |                  |                  |                      |        |                    |                    |                     |        |                    |                    |       |                |                |                    |
| Global                   | 115.66           | 117.96           | 0.08 (0.04, 0.13)    | <0.001 | 1629.15            | 1803.01            | 0.37 (0.30, 0.44)   | <0.001 | 949.35             | 648.68             | -1.22 | 13.24          | 8.26           | -1.54              |
|                          | (93.32, 140.36)  | (94.36, 144.29)  |                      |        | (1372.31, 1974.41) | (1495.35, 2201.49) |                     |        | (868.82, 1036.07)  | (573.42, 723.60)   |       | (-1.71, -0.73) | (12.02, 14.50) | (7.21, 9.29)       |
| <b>SDI category</b>      |                  |                  |                      |        |                    |                    |                     |        |                    |                    |       |                |                |                    |
| High                     | 104.76           | 109.24           | 0.14 (0.10, 0.18)    | <0.001 | 1441.24            | 1417.69            | -0.04 (-0.10, 0.02) | 0.173  | 437.84             | 306.45             | -1.21 | 5.32           | 3.18           | -1.76              |
|                          | (87.97, 123.14)  | (92.61, 127.10)  |                      |        | (1156.42, 1837.35) | (1183.25, 1729.59) |                     |        | (398.07, 484.50)   | (268.82, 352.12)   |       | (-1.50, -0.91) | (5.11, 5.55)   | (2.95, 3.47)       |
| High-middle              | 91.33            | 84.28            | -0.27 (-0.30, -0.24) | <0.001 | 1169.83            | 1204.03            | 0.12 (0.06, 0.18)   | <0.001 | 682.49             | 412.92             | -1.65 | 9.17           | 4.81           | -2.15              |
|                          | (75.44, 109.94)  | (68.60, 102.46)  |                      |        | (1009.42, 1380.42) | (1027.98, 1426.25) |                     |        | (612.85, 760.03)   | (364.27, 465.52)   |       | (-2.44, -0.85) | (8.18, 10.39)  | (4.24, 5.39)       |
| 97                       |                  |                  |                      |        |                    |                    |                     |        |                    |                    |       |                |                |                    |

|                              | 2019             | 2020             | Change (2019-2020)   | Significance | 2019               | 2020               | Change (2019-2020) | Significance | 2019               | 2020              | Change (2019-2020) | Significance | 2019           | 2020           | Change (2019-2020) | Significance |
|------------------------------|------------------|------------------|----------------------|--------------|--------------------|--------------------|--------------------|--------------|--------------------|-------------------|--------------------|--------------|----------------|----------------|--------------------|--------------|
| Middle                       | 108.72           | 104.93           | -0.11 (-0.16, -0.06) | <0.001       | 1577.23            | 1644.40            | 0.16 (0.07, 0.26)  | 0.001        | 1050.27            | 623.54            | -1.62              | <0.001       | 14.77          | 7.86           | -1.99              | <0.001       |
|                              | (85.79, 134.19)  | (82.59, 130.42)  |                      |              | (1315.81, 1891.93) | (1365.52, 1989.97) |                    |              | (944.85, 1162.13)  | (554.71, 698.67)  |                    |              | (13.27, 16.53) | (6.84, 8.86)   |                    |              |
|                              | 146.08           | 142.96           | -0.05 (-0.19, 0.09)  | 0.503        | 2004.08            | 2120.97            | 0.21 (0.15, 0.27)  | <0.001       | 1343.66            | 891.41            | -1.39              | <0.001       | 19.46          | 12.02          | -1.63              | <0.001       |
| Low-middle                   | (112.58, 184.13) | (108.89, 179.68) |                      |              | (1618.26, 2443.41) | (1696.65, 2584.60) |                    |              | (1170.07, 1506.67) | (755.21, 1034.03) |                    |              | (16.68, 22.03) | (9.96, 14.17)  |                    |              |
|                              | 154.20           | 151.67           | -0.06 (-0.07, -0.03) | <0.001       | 2471.44            | 2629.15            | 0.23 (0.15, 0.32)  | <0.001       | 1233.68            | 832.72            | -1.34              | <0.001       | 17.36          | 10.70          | -1.65              | <0.001       |
| Low                          | (117.44, 195.83) | (113.66, 194.65) |                      |              | (1955.65, 3111.07) | (2058.67, 3346.74) |                    |              | (1058.64, 1425.19) | (714.90, 973.29)  |                    |              | (14.54, 20.30) | (8.87, 12.72)  |                    |              |
| <b>21 GBD region</b>         |                  |                  |                      |              |                    |                    |                    |              |                    |                   |                    |              |                |                |                    |              |
| South Asia                   | 153.95           | 147.55           | -0.15 (-0.21, -0.09) | <0.001       | 1967.34            | 1968.01            | 0.01 (-0.05, 0.07) | 0.750        | 1384.96            | 939.04            | -1.34              | 0.001        | 20.24          | 12.97          | -1.55              | 0.001        |
|                              | (117.90, 193.92) | (112.57, 186.37) |                      |              | (1564.37, 2410.01) | (1562.64, 2407.89) |                    |              | (1198.52, 1581.56) | (779.42, 1125.01) |                    |              | (17.13, 23.35) | (10.35, 15.83) |                    |              |
|                              | 91.13            | 79.81            | -0.47 (-0.58, -0.37) | <0.001       | 1215.15            | 1156.54            | -0.17              | <0.001       | 839.98             | 378.85            | -2.38              | <0.001       | 11.50          | 4.12           | -3.38              | <0.001       |
| East Asia                    | (71.98, 113.32)  | (62.76, 98.77)   |                      |              | (1002.65, 1445.33) | (978.65, 1381.45)  |                    |              | (672.10, 1026.95)  | (307.69, 453.01)  |                    |              | (8.84, 14.56)  | (3.14, 5.21)   |                    |              |
|                              | 115.96           | 114.75           | -0.03 (-0.05, -0.01) | 0.001        | 1705.15            | 1757.93            | 0.12 (0.06, 0.19)  | <0.001       | 1450.41            | 875.04            | -1.69              | <0.001       | 21.27          | 11.88          | -1.93              | <0.001       |
| North Africa and Middle East | (94.40, 140.23)  | (93.02, 139.12)  |                      |              | (1405.08, 2101.41) | (1450.79, 2169.56) |                    |              | (1273.49, 1642.31) | (706.33, 1088.62) |                    |              | (18.61, 24.58) | (9.31, 15.07)  |                    |              |
| Western Sub-Saharan Africa   | 130.95           | 131.81           | 0.03 (0.02, 0.04)    | <0.001       | 2527.41            | 2753.75            | 0.30 (0.28, 0.33)  | <0.001       | 865.68             | 633.35            | -1.07              | <0.001       | 11.33          | 7.36           | -1.47              | <0.001       |
|                              | (99.32, 167.70)  | (98.59, 170.58)  |                      |              | (1954.53, 3364.03) | (2099.88, 3723.75) |                    |              | (699.93, 1080.63)  | (500.85, 797.01)  |                    |              | (8.89, 14.69)  | (5.50, 9.87)   |                    |              |
| Southeast Asia               | 90.25            | 89.28            | -0.03 (-0.07, 0.00)  | 0.080        | 1183.99            | 1204.38            | 0.08 (0.01, 0.14)  | 0.016        | 1131.79            | 750.63            | -1.37              | <0.001       | 16.09          | 9.91           | -1.63              | <0.001       |
|                              | (72.89, 112.53)  | (71.53, 110.83)  |                      |              | (1006.15, 1404.49) | (1023.27, 1418.05) |                    |              | (947.71, 1320.41)  | (633.32, 877.51)  |                    |              | (13.22, 19.01) | (8.13, 11.90)  |                    |              |
|                              | 163.06           | 156.10           | -0.16 (-0.18, -0.13) | <0.001       | 3135.26            | 3368.93            | 0.26 (0.19, 0.34)  | <0.001       | 1088.08            | 647.61            | -1.76              | <0.001       | 14.38          | 7.04           | -2.42              | <0.001       |
| Eastern Sub-Saharan Africa   | (119.77, 214.99) | (110.96, 208.21) |                      |              | (2447.77, 3993.87) | (2620.95, 4301.92) |                    |              | (885.04, 1319.81)  | (532.72, 789.69)  |                    |              | (11.14, 17.79) | (5.52, 8.91)   |                    |              |
| Central Latin America        | 101.91           | 93.04            | -0.31 (-0.36, -0.25) | <0.001       | 1678.02            | 1676.66            | 0.02 (-0.13, 0.18) | 0.771        | 732.52             | 446.19            | -1.62              | <0.001       | 10.08          | 5.46           | -1.71              | <0.001       |
|                              | (82.77, 125.96)  | (73.88, 114.77)  |                      |              | (1409.95, 2016.26) | (1392.09, 2049.84) |                    |              | (685.53, 783.65)   | (367.53, 535.97)  |                    |              | (9.61, 10.59)  | (4.33, 6.75)   |                    |              |
|                              | 146.90           | 130.82           | -0.40 (-0.45, -0.35) | <0.001       | 2675.05            | 2631.91            | -0.04              | 0.468        | 1072.48            | 527.53            | -2.45              | <0.001       | 14.82          | 6.04           | -3.11              | <0.001       |
| Tropical Latin America       | (112.70, 195.83) | (97.97, 194.65)  |                      |              | (2179.00, 3111.07) | (2113.67, 3346.74) |                    |              | (1003.78, 1425.19) | (468.80, 973.29)  |                    |              | (14.05, 20.30) | (5.54, 12.72)  |                    |              |
| 98                           |                  |                  |                      |              |                    |                    |                    |              |                    |                   |                    |              |                |                |                    |              |

| Global Economic Performance Report: Q3 2023 |                     |                  |                      |              |                     |                    |                    |              |                          |                    |                 |         |                |                   |                |        |
|---------------------------------------------|---------------------|------------------|----------------------|--------------|---------------------|--------------------|--------------------|--------------|--------------------------|--------------------|-----------------|---------|----------------|-------------------|----------------|--------|
| Region                                      | Q3 2023 Performance |                  |                      |              | Q3 2022 Performance |                    |                    |              | Annual Summary & Outlook |                    |                 |         |                |                   |                |        |
|                                             | Revenue (\$B)       | Profit (\$B)     | Change (%)           | Significance | Revenue (\$B)       | Profit (\$B)       | Change (%)         | Significance | Total Revenue (\$B)      | Total Profit (\$B) | Avg. Change (%) | Outlook | Risk           | Confidence        |                |        |
| Central Sub-Saharan Africa                  | 187.68              | 170.08           | -0.12 (-0.16, -0.08) | <0.001       | 3245.94             | 3215.63            | 0.06               | 0.020        | 1145.84                  | 599.74             | -2.26           | 15.66   | 6.49           | -2.69             |                |        |
|                                             | 159.97              | 153.29           | -0.14 (-0.16, -0.13) | <0.001       | 2979.15             | 3047.60            | 0.09 (0.01, 0.17)  | 0.020        | 901.56                   | 612.20             | -1.32           | 11.65   | 6.91           | -1.78             |                |        |
|                                             | (117.07, 211.50)    | (108.95, 203.72) |                      |              | (2288.42, 3824.21)  | (2317.45, 3931.34) |                    |              | (638.68, 1222.66)        | (466.63, 796.97)   | (-1.44, -1.21)  | <0.001  | (7.38, 16.82)  | (4.80, 9.70)      | (-1.93, -1.64) | <0.001 |
| Western Europe                              | 82.98               | 79.94            | -0.12 (-0.15, -0.09) | <0.001       | 1218.59             | 1179.71            | -0.12              | <0.001       | 367.93                   | 196.95             | -2.17           | 4.49    | 1.79           | -3.21             |                |        |
|                                             | (65.87, 100.98)     | (63.70, 97.64)   |                      |              | (916.68, 1623.77)   | (899.36, 1534.22)  | (-0.17, -0.06)     | <0.001       | (335.56, 408.45)         | (166.95, 233.73)   | (-2.56, -1.77)  | <0.001  | (4.31, 4.67)   | (1.68, 1.93)      | (-3.50, -2.93) | <0.001 |
|                                             | 141.14              | 153.30           | 0.29 (0.21, 0.38)    | <0.001       | 1948.37             | 1851.82            | -0.15              | <0.001       | 446.75                   | 392.69             | -0.38           | 5.08    | 4.23           | -0.56             |                |        |
| High-income North America                   | (122.70, 161.87)    | (133.58, 174.01) |                      |              | (1563.20, 2536.70)  | (1568.04, 2228.85) | (-0.22, -0.08)     | <0.001       | (400.24, 503.69)         | (346.15, 446.64)   | (-0.80, 0.04)   | 0.076   | (4.91, 5.25)   | (3.95, 4.61)      | (-1.24, 0.12)  | 0.106  |
|                                             | 135.05              | 130.55           | -0.11 (-0.16, -0.06) | <0.001       | 1644.12             | 1684.81            | 0.09 (0.03, 0.15)  | 0.002        | 1090.92                  | 871.07             | -0.80           | 15.44   | 11.89          | -0.89             |                |        |
|                                             | (110.09, 164.89)    | (105.03, 161.36) |                      |              | (1352.48, 1954.64)  | (1389.15, 2015.04) |                    |              | (1015.98, 1161.55)       | (746.92, 1023.41)  | (-1.21, -0.38)  | <0.001  | (14.39, 16.44) | (9.98, 14.19)     | (-1.61, -0.17) | 0.016  |
| Central Asia                                | 94.87               | 102.34           | 0.27 (0.25, 0.29)    | <0.001       | 817.38              | 905.71             | 0.39 (0.22, 0.56)  | <0.001       | 510.96                   | 665.31             | 1.02            | 6.63    | 8.95           | 1.22 (0.01, 2.43) | 0.048          |        |
|                                             | (77.24, 115.65)     | (83.71, 123.82)  |                      |              | (706.33, 939.38)    | (789.36, 1028.43)  |                    |              | (462.74, 552.00)         | (543.20, 815.70)   | (0.10, 1.95)    | 0.030   | (6.05, 6.98)   | (7.09, 11.28)     |                |        |
|                                             | 167.40              | 156.51           | -0.23 (-0.27, -0.20) | <0.001       | 2869.13             | 2849.51            | -0.02              | 0.607        | 1369.54                  | 676.76             | -2.37           | 19.14   | 7.99           | -2.80             |                |        |
| Southern Sub-Saharan Africa                 | (125.03, 218.53)    | (115.23, 206.61) |                      |              | (2275.72, 3523.94)  | (2236.61, 3520.74) | (-0.08, 0.05)      | 0.607        | (1124.48, 1602.27)       | (451.54, 939.86)   | (-3.60, -1.12)  | <0.001  | (15.23, 22.65) | (4.53, 12.26)     | (-4.57, -0.99) | 0.003  |
|                                             | 102.53              | 99.98            | -0.08 (-0.12, -0.04) | <0.001       | 1056.64             | 1061.54            | 0.04 (-0.10, 0.18) | 0.607        | 483.69                   | 175.92             | -3.48           | 6.47    | 1.50           | -5.00             |                |        |
|                                             | (88.66, 117.86)     | (86.54, 114.86)  |                      |              | (877.31, 1307.69)   | (891.16, 1310.88)  |                    |              | (424.38, 533.96)         | (148.95, 207.79)   | (-3.75, -3.20)  | <0.001  | (5.83, 7.10)   | (1.35, 1.68)      | (-5.38, -4.61) | <0.001 |
| High-income Asia Pacific                    | 81.40               | 81.50            | 0.01 (-0.04, 0.07)   | 0.659        | 1309.10             | 1344.41            | 0.11 (-0.09, 0.32) | 0.270        | 589.85                   | 333.80             | -1.92           | 7.44    | 3.30           | -2.66             |                |        |
|                                             | (66.47, 98.77)      | (66.96, 98.48)   |                      |              | (1058.63, 1649.90)  | (1094.43, 1672.56) |                    |              | (543.29, 641.58)         | (277.51, 391.39)   | (-2.08, -1.76)  | <0.001  | (7.13, 7.80)   | (2.67, 4.00)      | (-2.95, -2.36) | <0.001 |
|                                             | 130.95              | 120.09           | -0.30 (-0.32, -0.28) | <0.001       | 2297.33             | 2352.90            | 0.08 (0.05, 0.11)  | <0.001       | 1107.50                  | 535.65             | -2.58           | 15.68   | 6.40           | -3.15             |                |        |
| Andean Latin America                        | (100.91, 166.02)    | (90.38, 154.49)  |                      |              | (1857.37, 2846.68)  | (1878.39, 2867.78) |                    |              | (926.52, 1309.11)        | (415.62, 685.98)   | (-3.08, -2.08)  | <0.001  | (13.06, 18.99) | (4.59, 8.73)      | (-3.75, -2.55) | <0.001 |
|                                             | 180.26              | 192.35           | 0.24 (0.21, 0.28)    | <0.001       | 2195.67             | 2296.53            | 0.17 (0.07, 0.27)  | 0.001        | 1194.82                  | 1075.69            | -0.34           | 17.34   | 15.33          | -0.41             |                |        |
|                                             | (146.01, 219.82)    | (153.54, 235.43) |                      |              | (1802.05, 2650.62)  | (1871.40, 2781.79) |                    |              | (924.54, 1464.13)        | (733.12, 1470.44)  | (-0.57, -0.12)  | 0.003   | (13.11, 21.73) | (9.87, 21.86)     | (-0.66, -0.15) | 0.002  |
| Caribbean                                   | 88.10               | 86.76            | -0.05 (-0.08, -0.02) | 0.002        | 1580.59             | 1675.63            | 0.20 (0.15, 0.26)  | <0.001       | 736.11                   | 370.17             | -2.37           | 10.01   | 4.05           | -3.08             |                |        |
|                                             | (70.04, 88.10)      | (68.46, 86.76)   |                      |              | (1249.76, 1580.59)  | (1317.80, 1675.63) |                    |              | (675.07, 736.11)         | (316.28, 370.17)   | (-2.99, -2.37)  | <0.001  | (9.09, 10.01)  | (3.40, 4.05)      | (-3.77, -3.08) | <0.001 |



|                              |          |          |               |        |           |           |              |        |           |           |         |        |         |         |              |        |
|------------------------------|----------|----------|---------------|--------|-----------|-----------|--------------|--------|-----------|-----------|---------|--------|---------|---------|--------------|--------|
|                              | 103.49   | 93.32    |               |        | 1071.75   | 974.43    | -0.33        |        | 982.61    | 779.80    | -0.79   |        | 14.37   | 11.20   | -0.84        |        |
| East Asia                    | (83.17,  | (75.19,  | -0.35 (-0.40, | <0.001 | (888.83,  | (813.20,  | (-0.37,      | <0.001 | (816.80,  | (649.51,  | (-1.17, | <0.001 | (11.82, | (9.13,  | (-1.28,      | <0.001 |
|                              | 127.09)  | 115.03)  | -0.30)        |        | 1286.45)  | 1175.18)  | -0.29)       |        | 1125.28)  | 903.91)   | -0.40)  |        | 16.73)  | 13.29)  | -0.40)       |        |
| North Africa and Middle East | 120.24   | 122.09   | 0.06 (0.03,   | <0.001 | 1553.45   | 1619.71   | 0.16 (0.05,  | 0.003  | 1628.81   | 1134.12   | -1.19   |        | 24.59   | 16.49   | -1.30        |        |
|                              | (97.93,  | (98.73,  | 0.08)         |        | (1249.29, | (1307.21, | 0.26)        |        | (1416.02, | (920.86,  | (-1.49, | <0.001 | (21.19, | (13.08, | (-1.62,      | <0.001 |
|                              | 145.13)  | 148.08)  |               |        | 1957.33)  | 2032.04)  |              |        | 1921.40)  | 1399.97)  | -0.88)  |        | 29.31)  | 20.78)  | -0.99)       |        |
| Western Sub-Saharan Africa   | 145.86   | 148.57   | 0.06 (0.05,   | <0.001 | 2577.60   | 2778.56   | 0.27 (0.25,  | <0.001 | 948.92    | 888.44    | -0.23   |        | 12.86   | 11.69   | -0.33        |        |
|                              | (113.65, | (115.98, | 0.07)         |        | (1918.50, | (2051.04, | 0.30)        |        | (765.66,  | (704.95,  | (-0.32, | <0.001 | (10.06, | (9.08,  | (-0.49,      | <0.001 |
|                              | 183.55)  | 187.91)  |               |        | 3548.53)  | 3823.01)  |              |        | 1177.20)  | 1093.20)  | -0.15)  |        | 16.42)  | 14.97)  | -0.17)       |        |
| Southeast Asia               | 102.09   | 101.42   | -0.02 (-0.03, | 0.023  | 978.03    | 1006.56   | 0.12 (0.02,  | 0.017  | 1355.63   | 1292.17   | -0.15   |        | 20.29   | 19.25   | -0.16        |        |
|                              | (83.49,  | (82.53,  | -0.00)        |        | (833.73,  | (848.68,  | 0.21)        |        | (1180.73, | (1023.04, | (-0.38, | 0.184  | (17.38, | (15.08, | (-0.40,      | 0.170  |
|                              | 123.74)  | 123.69)  |               |        | 1148.15)  | 1192.61)  |              |        | 1556.08)  | 1493.57)  | 0.07)   |        | 23.62)  | 22.64)  | 0.07)        |        |
| Eastern Sub-Saharan Africa   | 172.91   | 168.18   | -0.09 (-0.12, | <0.001 | 2530.93   | 2694.44   | 0.22 (0.18,  | <0.001 | 1175.82   | 986.21    | -0.63   |        | 16.63   | 13.41   | -0.76        |        |
|                              | (132.31, | (126.46, | -0.07)        |        | (1975.44, | (2074.34, | 0.26)        |        | (980.60,  | (813.99,  | (-0.81, | <0.001 | (13.62, | (10.80, | (-0.96,      | <0.001 |
|                              | 221.49)  | 218.32)  |               |        | 3167.49)  | 3403.33)  |              |        | 1365.09)  | 1179.38)  | -0.45)  |        | 19.55)  | 16.69)  | -0.57)       |        |
| Central Latin America        | 93.43    | 93.75    | 0.01 (-0.01,  | 0.222  | 1058.77   | 1112.40   | 0.18 (0.14,  | <0.001 | 843.81    | 672.55    | -0.76   |        | 12.62   | 9.80    | -0.67        |        |
|                              | (74.38,  | (74.62,  | 0.04)         |        | (884.67,  | (913.47,  | 0.23)        |        | (795.89,  | (587.82,  | (-1.29, | 0.005  | (11.98, | (8.49,  | (-0.93,      | <0.001 |
|                              | 114.78)  | 114.85)  |               |        | 1266.33)  | 1350.07)  |              |        | 892.58)   | 766.48)   | -0.23)  |        | 13.30)  | 11.25)  | -0.42)       |        |
| Tropical Latin America       | 145.03   | 132.91   | -0.31 (-0.34, | <0.001 | 1958.24   | 1892.64   | -0.11        | <0.001 | 1278.57   | 757.42    | -1.79   |        | 18.95   | 10.56   | -2.00        |        |
|                              | (113.06, | (102.03, | -0.28)        |        | (1575.54, | (1519.94, | (-0.14,      | <0.001 | (1198.17, | (699.47,  | (-2.00, | <0.001 | (17.80, | (9.84,  | (-2.27,      | <0.001 |
|                              | 182.25)  | 169.63)  |               |        | 2413.87)  | 2326.21)  | -0.09)       |        | 1365.66)  | 823.29)   | -1.58)  |        | 20.19)  | 11.41)  | -1.73)       |        |
| Central Sub-Saharan Africa   | 169.77   | 164.25   | -0.11 (-0.13, | <0.001 | 2578.58   | 2592.36   | 0.02 (-0.01, | 0.250  | 991.34    | 831.11    | -0.64   |        | 13.69   | 11.07   | -0.77        |        |
|                              | (128.76, | (121.39, | -0.10)        |        | (1977.56, | (1931.95, | 0.05)        |        | (699.11,  | (602.80,  | (-0.74, | <0.001 | (9.17,  | (7.41,  | (-0.89,      | <0.001 |
|                              | 221.53)  | 219.52)  |               |        | 3343.99)  | 3341.12)  |              |        | 1350.90)  | 1118.66)  | -0.54)  |        | 19.54)  | 15.77)  | -0.66)       |        |
| Western Europe               | 85.79    | 79.67    | -0.25 (-0.29, | <0.001 | 591.98    | 571.14    | -0.13        | <0.001 | 591.73    | 280.87    | -2.60   |        | 8.76    | 3.79    | -2.93        |        |
|                              | (66.31,  | (62.20,  | -0.21)        |        | (463.20,  | (452.75,  | (-0.20,      | <0.001 | (561.24,  | (259.79,  | (-2.97, | <0.001 | (8.34,  | (3.56,  | (-3.37,      | <0.001 |
|                              | 106.14)  | 98.65)   |               |        | 745.73)   | 717.22)   | -0.06)       |        | 623.52)   | 305.08)   | -2.24)  |        | 9.19)   | 4.00)   | -2.48)       |        |
| High-income North America    | 119.08   | 127.14   | 0.22 (0.18,   | <0.001 | 1103.86   | 1151.98   | 0.22 (-0.03, | 0.089  | 573.46    | 510.26    | -0.38   |        | 7.95    | 6.82    | -0.50        |        |
|                              | (97.69,  | (107.34, | 0.26)         |        | (926.79,  | (996.96,  | 0.47)        |        | (541.06,  | (454.01,  | (-0.68, | 0.011  | (7.66,  | (6.12,  | (-0.95,      | 0.028  |
|                              | 142.53)  | 147.55)  |               |        | 1336.40)  | 1334.16)  |              |        | 609.61)   | 556.18)   | -0.09)  |        | 8.25)   | 7.31)   | -0.06)       |        |
| Central Asia                 | 146.26   | 145.38   | -0.02 (-0.04, | 0.051  | 1367.99   | 1442.60   | 0.18 (0.14,  | <0.001 | 1384.77   | 1373.42   | -0.04   |        | 20.86   | 20.65   | 0.03 (-0.83, | 0.954  |
|                              | (120.48, | (117.90, | 0.00)         |        | (1123.97, | (1155.30, | 0.22)        |        | (1299.13, | (1218.52, | (-0.75, | 0.903  | (19.61, | (18.29, | 0.89)        |        |
|                              | 175.96)  | 176.79)  |               |        | 1659.20)  | 1767.86)  |              |        | 1467.09)  | 1540.16)  | 0.67)   |        | 22.15)  | 23.24)  |              |        |

|                     |          |          |               |        |           |           |              |        |           |           |         |        |         |         |              |        |
|---------------------|----------|----------|---------------|--------|-----------|-----------|--------------|--------|-----------|-----------|---------|--------|---------|---------|--------------|--------|
|                     | 110.15   | 124.56   |               |        | 527.24    | 588.21    |              |        | 1369.93   | 2163.54   | 1.62    |        | 21.33   | 34.28   |              |        |
| Eastern Europe      | (89.23,  | (104.04, | 0.43 (0.41,   | <0.001 | (460.51,  | (515.20,  | 0.38 (0.34,  | <0.001 | (1319.97, | (1926.71, | (0.37,  | 0.011  | (20.49, | (30.49, | 1.70 (0.43,  | 0.009  |
|                     | 132.24)  | 147.38)  | 0.45)         |        | 599.28)   | 667.33)   | 0.43)        |        | 1416.53)  | 2402.79)  | 2.89)   |        | 22.00)  | 38.14)  | 2.98)        |        |
| Southern            | 177.70   | 174.57   |               |        | 2429.56   | 2469.09   |              |        | 1023.61   | 821.34    | -0.83   |        | 14.23   | 10.94   | -0.93        |        |
| Sub-Saharan Africa  | (137.64, | (134.31, | -0.06 (-0.08, | <0.001 | (1895.17, | (1948.74, | 0.06 (0.04,  | <0.001 | (859.31,  | (675.90,  | (-1.32, | 0.001  | (11.70, | (8.71,  | (-1.50,      | 0.002  |
|                     | 223.91)  | 221.69)  | -0.03)        |        | 3029.36)  | 3080.51)  | 0.08)        |        | 1219.00)  | 999.69)   | -0.34)  |        | 17.33)  | 13.80)  | -0.35)       |        |
| High-income Asia    | 113.27   | 114.13   |               |        | 740.37    | 794.88    |              |        | 699.42    | 277.65    | -3.17   |        | 10.44   | 3.61    | -3.51        |        |
| Pacific             | (96.27,  | (97.42,  | 0.04 (-0.02,  | 0.195  | (619.48,  | (676.19,  | 0.26 (0.19,  | <0.001 | (615.43,  | (251.93,  | (-3.58, | <0.001 | (9.00,  | (3.32,  | (-3.85,      | <0.001 |
|                     | 131.12)  | 131.30)  | 0.11)         |        | 901.45)   | 946.74)   | 0.33)        |        | 766.28)   | 307.58)   | -2.75)  |        | 11.50)  | 4.01)   | -3.18)       |        |
| Central Europe      | 93.60    | 95.77    |               |        | 793.04    | 812.08    |              |        | 1072.47   | 539.78    | -2.37   |        | 16.26   | 7.70    | -2.56        |        |
|                     | (76.00,  | (78.48,  | 0.08 (0.06,   | <0.001 | (642.04,  | (657.92,  | 0.09 (-0.01, | 0.070  | (1026.22, | (481.78,  | (-2.73, | <0.001 | (15.65, | (6.83,  | (-2.95,      | <0.001 |
|                     | 113.48)  | 114.11)  | 0.11)         |        | 984.62)   | 1003.33)  | 0.19)        |        | 1122.72)  | 604.21)   | -2.00)  |        | 16.96)  | 8.65)   | -2.18)       |        |
| Andean Latin        | 128.25   | 123.02   |               |        | 1910.34   | 1935.63   |              |        | 1223.86   | 845.19    | -1.22   |        | 18.05   | 11.91   | -1.33        |        |
| America             | (101.02, | (95.02,  | -0.15 (-0.17, | <0.001 | (1498.17, | (1554.52, | 0.05 (0.03,  | <0.001 | (1003.83, | (664.34,  | (-1.87, | <0.001 | (14.62, | (9.05,  | (-1.92,      | <0.001 |
|                     | 161.17)  | 155.57)  | -0.13)        |        | 2382.31)  | 2399.95)  | 0.06)        |        | 1453.36)  | 1079.91)  | -0.56)  |        | 21.79)  | 15.60)  | -0.74)       |        |
| Caribbean           | 166.84   | 175.43   |               |        | 1807.83   | 1887.11   |              |        | 1096.48   | 910.09    | -0.63   |        | 16.21   | 13.13   | -0.71        |        |
|                     | (131.58, | (138.95, | 0.18 (0.17,   | <0.001 | (1462.53, | (1512.67, | 0.15 (0.12,  | <0.001 | (968.38,  | (700.90,  | (-0.84, | <0.001 | (14.13, | (9.76,  | (-0.95,      | <0.001 |
|                     | 206.83)  | 216.41)  | 0.19)         |        | 2197.91)  | 2293.67)  | 0.18)        |        | 1231.80)  | 1202.84)  | -0.42)  |        | 18.37)  | 17.83)  | -0.47)       |        |
| Southern Latin      | 94.24    | 96.89    |               |        | 1099.43   | 1177.05   |              |        | 927.73    | 528.00    | -1.93   |        | 13.73   | 7.24    | -2.18        |        |
| America             | (75.09,  | (77.31,  | 0.09 (0.05,   | <0.001 | (874.58,  | (915.13,  | 0.23 (0.16,  | <0.001 | (845.73,  | (453.17,  | (-2.21, | <0.001 | (12.41, | (6.13,  | (-2.50,      | <0.001 |
|                     | 114.25)  | 119.72)  | 0.13)         |        | 1383.34)  | 1471.33)  | 0.30)        |        | 1019.11)  | 603.88)   | -1.64)  |        | 15.12)  | 8.27)   | -1.86)       |        |
| Oceania             | 141.35   | 145.83   |               |        | 1331.31   | 1369.11   |              |        | 2363.39   | 2439.18   | 0.04    |        | 36.24   | 37.47   |              |        |
|                     | (116.13, | (120.84, | 0.11 (0.10,   | <0.001 | (1097.99, | (1100.22, | 0.10 (0.07,  | <0.001 | (1669.93, | (1650.15, | (-0.07, | 0.451  | (25.02, | (24.66, | 0.05 (-0.07, | 0.429  |
|                     | 170.59)  | 174.29)  | 0.12)         |        | 1622.29)  | 1673.64)  | 0.14)        |        | 3182.71)  | 3486.78)  | 0.15)   |        | 49.45)  | 54.04)  | 0.16)        |        |
| Australasia         | 121.13   | 123.63   |               |        | 540.54    | 586.42    |              |        | 521.56    | 281.78    | -2.06   |        | 7.73    | 3.91    | -2.29        |        |
|                     | (88.48,  | (93.86,  | 0.07 (0.04,   | <0.001 | (423.09,  | (458.43,  | 0.27 (0.20,  | <0.001 | (471.14,  | (240.21,  | (-2.87, | <0.001 | (6.98,  | (3.27,  | (-3.18,      | <0.001 |
|                     | 154.51)  | 156.49)  | 0.10)         |        | 680.79)   | 733.15)   | 0.34)        |        | 579.98)   | 328.37)   | -1.24)  |        | 8.62)   | 4.63)   | -1.38)       |        |
| <b>30-34 years</b>  |          |          |               |        |           |           |              |        |           |           |         |        |         |         |              |        |
| <b>Women</b>        |          |          |               |        |           |           |              |        |           |           |         |        |         |         |              |        |
| Global              | 137.24   | 130.97   |               |        | 1909.73   | 2012.52   |              |        | 1329.67   | 909.24    | -1.30   |        | 20.71   | 13.24   | -1.53        |        |
|                     | (119.17, | (112.03, | -0.16 (-0.21, | <0.001 | (1656.10, | (1715.63, | 0.18 (0.14,  | <0.001 | (1221.20, | (811.73,  | (-1.67, | <0.001 | (18.92, | (11.77, | (-1.93,      | <0.001 |
|                     | 157.25)  | 152.02)  | -0.10)        |        | 2225.90)  | 2367.07)  | 0.23)        |        | 1432.47)  | 1007.44)  | -0.94)  |        | 22.48)  | 14.66)  | -1.13)       |        |
| <b>SDI category</b> |          |          |               |        |           |           |              |        |           |           |         |        |         |         |              |        |

|             |          |          |               |        |           |           |              |        |           |           |         |        |         |         |         |        |
|-------------|----------|----------|---------------|--------|-----------|-----------|--------------|--------|-----------|-----------|---------|--------|---------|---------|---------|--------|
|             | 143.32   | 141.56   |               |        | 1862.91   | 1859.56   |              |        | 618.12    | 454.25    | -1.04   |        | 8.64    | 5.72    | -1.35   |        |
| High        | (125.62, | (125.16, | -0.04 (-0.11, | 0.364  | (1566.28, | (1615.35, | 0.02 (-0.10, | 0.710  | (574.30,  | (408.20,  | (-1.29, | <0.001 | (8.35,  | (5.29,  | (-1.71, | <0.001 |
|             | 161.97)  | 159.53)  | 0.04)         |        | 2280.57)  | 2189.92)  | 0.14)        |        | 669.85)   | 507.45)   | -0.79)  |        | 8.95)   | 6.25)   | -0.98)  |        |
|             | 120.11   | 106.15   |               |        | 1483.35   | 1490.48   |              |        | 1002.59   | 635.57    | -1.67   |        | 15.15   | 8.73    | -2.02   |        |
| High-middle | (104.30, | (90.70,  | -0.42 (-0.48, | <0.001 | (1309.24, | (1310.63, | 0.02 (-0.01, | 0.201  | (914.04,  | (566.73,  | (-2.53, | <0.001 | (13.83, | (7.72,  | (-3.15, | 0.001  |
|             | 138.94)  | 123.99)  | -0.37)        |        | 1700.71)  | 1712.97)  | 0.05)        |        | 1107.53)  | 708.63)   | -0.80)  |        | 16.91)  | 9.76)   | -0.88)  |        |
|             | 129.76   | 120.35   |               |        | 1867.72   | 1894.77   |              |        | 1507.30   | 854.27    | -1.85   |        | 23.63   | 12.19   | -2.16   |        |
| Middle      | (110.93, | (101.85, | -0.26 (-0.31, | <0.001 | (1606.29, | (1613.60, | 0.05 (-0.04, | 0.304  | (1363.29, | (758.08,  | (-2.58, | <0.001 | (21.26, | (10.67, | (-2.92, | <0.001 |
|             | 150.50)  | 141.28)  | -0.20)        |        | 2183.04)  | 2240.10)  | 0.14)        |        | 1654.08)  | 948.82)   | -1.12)  |        | 26.09)  | 13.65)  | -1.38)  |        |
|             | 153.28   | 147.91   |               |        | 2256.48   | 2339.81   |              |        | 1900.55   | 1282.82   | -1.35   |        | 30.63   | 19.66   | -1.53   |        |
| Low-middle  | (129.45, | (124.13, | -0.12 (-0.15, | <0.001 | (1873.83, | (1948.61, | 0.12 (0.06,  | <0.001 | (1647.22, | (1087.89, | (-1.64, | <0.001 | (25.92, | (16.42, | (-1.86, | <0.001 |
|             | 179.22)  | 174.79)  | -0.09)        |        | 2683.35)  | 2798.40)  | 0.20)        |        | 2140.00)  | 1467.60)  | -1.05)  |        | 34.78)  | 22.77)  | -1.19)  |        |
|             | 165.74   | 158.82   |               |        | 2604.43   | 2718.38   |              |        | 1771.13   | 1240.26   | -1.23   |        | 28.09   | 18.63   | -1.44   |        |
| Low         | (140.28, | (132.20, | -0.15 (-0.16, | <0.001 | (2122.15, | (2201.85, | 0.16 (0.09,  | <0.001 | (1515.23, | (1062.52, | (-1.33, | <0.001 | (23.87, | (15.57, | (-1.54, | <0.001 |
|             | 194.35)  | 187.84)  | -0.14)        |        | 3197.44)  | 3369.93)  | 0.24)        |        | 2034.26)  | 1452.16)  | -1.14)  |        | 32.51)  | 21.95)  | -1.33)  |        |

**21 GBD region**

|                              |          |          |               |        |           |           |              |        |           |           |         |        |         |         |         |        |
|------------------------------|----------|----------|---------------|--------|-----------|-----------|--------------|--------|-----------|-----------|---------|--------|---------|---------|---------|--------|
|                              | 153.77   | 148.24   |               |        | 2228.78   | 2214.53   | -0.00        |        | 1920.00   | 1346.11   | -1.23   |        | 31.10   | 20.96   | -1.38   |        |
| South Asia                   | (128.75, | (124.13, | -0.12 (-0.15, | <0.001 | (1834.04, | (1817.74, | (-0.09,      | 0.948  | (1654.70, | (1104.50, | (-1.73, | <0.001 | (26.53, | (16.71, | (-1.94, | <0.001 |
|                              | 181.13)  | 176.17)  | -0.10)        |        | 2658.84)  | 2659.62)  | 0.08)        |        | 2181.49)  | 1594.36)  | -0.72)  |        | 35.90)  | 25.22)  | -0.82)  |        |
|                              | 111.90   | 97.04    |               |        | 1503.34   | 1460.26   | -0.10        |        | 1206.54   | 538.95    | -2.86   |        | 18.45   | 6.82    | -3.23   |        |
| East Asia                    | (95.18,  | (82.05,  | -0.49 (-0.52, | <0.001 | (1309.86, | (1263.98, | (-0.19,      | 0.044  | (972.57,  | (439.52,  | (-4.34, | <0.001 | (14.64, | (5.26,  | (-4.25, | <0.001 |
|                              | 130.81)  | 114.59)  | -0.46)        |        | 1753.37)  | 1697.14)  | -0.00)       |        | 1472.22)  | 648.26)   | -1.35)  |        | 23.10)  | 8.57)   | -2.20)  |        |
|                              | 152.98   | 147.18   |               |        | 2146.64   | 2141.48   |              |        | 2028.64   | 1231.32   | -1.69   |        | 32.72   | 18.68   | -1.88   |        |
| North Africa and Middle East | (133.01, | (126.90, | -0.14 (-0.15, | <0.001 | (1810.89, | (1810.72, | 0.01 (-0.08, | 0.820  | (1791.17, | (999.35,  | (-1.86, | <0.001 | (28.58, | (14.77, | (-2.03, | <0.001 |
|                              | 175.24)  | 169.64)  | -0.12)        |        | 2572.58)  | 2556.90)  | 0.10)        |        | 2294.05)  | 1489.54)  | -1.53)  |        | 37.38)  | 22.97)  | -1.72)  |        |
|                              | 146.98   | 143.82   |               |        | 2728.13   | 2946.43   |              |        | 1280.51   | 930.60    | -1.09   |        | 19.30   | 12.94   | -1.36   |        |
| Western Sub-Saharan Africa   | (123.30, | (119.64, | -0.08 (-0.09, | <0.001 | (2136.26, | (2276.99, | 0.27 (0.25,  | <0.001 | (1040.72, | (746.15,  | (-1.20, | <0.001 | (15.09, | (9.77,  | (-1.46, | <0.001 |
|                              | 172.98)  | 170.64)  | -0.07)        |        | 3663.97)  | 4089.83)  | 0.30)        |        | 1577.46)  | 1157.99)  | -0.99)  |        | 24.43)  | 16.90)  | -1.25)  |        |
|                              | 116.66   | 113.52   |               |        | 1488.41   | 1488.72   |              |        | 1643.60   | 1085.64   | -1.42   |        | 25.83   | 16.05   | -1.63   |        |
| Southeast Asia               | (100.46, | (97.64,  | -0.09 (-0.10, | <0.001 | (1298.41, | (1294.51, | 0.01 (-0.08, | 0.818  | (1402.63, | (916.11,  | (-1.55, | <0.001 | (21.49, | (13.25, | (-1.77, | <0.001 |
|                              | 136.51)  | 133.09)  | -0.08)        |        | 1712.42)  | 1703.97)  | 0.10)        |        | 1893.12)  | 1262.36)  | -1.28)  |        | 30.17)  | 19.21)  | -1.48)  |        |
|                              | 174.63   | 155.83   |               |        | 3116.74   | 3257.93   |              |        | 1514.21   | 886.98    | -1.82   |        | 23.01   | 11.90   | -2.25   |        |
| Eastern Sub-Saharan Africa   | (143.92, | (124.00, | -0.40 (-0.42, | <0.001 | (2516.95, | (2556.45, | 0.17 (0.11,  | <0.001 | (1228.32, | (723.06,  | (-1.93, | <0.001 | (18.00, | (9.40,  | (-2.37, | <0.001 |
|                              | 194.35)  | 187.84)  | -0.38)        |        | 3197.44)  | 3369.93)  | 0.22)        |        | 2034.26)  | 1452.16)  | -1.14)  |        | 32.51)  | 21.95)  | -1.33)  |        |

|                             |                  |                  |                      |        |                    |                    |                    |        |                    |                    |                |                |                |                   |        |
|-----------------------------|------------------|------------------|----------------------|--------|--------------------|--------------------|--------------------|--------|--------------------|--------------------|----------------|----------------|----------------|-------------------|--------|
|                             | 207.65)          | 189.43)          |                      |        | 3889.06)           | 4076.18)           |                    |        | 1810.67)           | 1064.85)           | -1.71)         | 27.98)         | 14.62)         | -2.12)            |        |
| Central Latin America       | 124.16           | 106.16           | -0.54 (-0.56, -0.52) | <0.001 | 1855.83            | 1831.76            | -0.04              | 0.404  | 999.37             | 568.72             | -1.75          | 15.51          | 7.96           | -2.00             |        |
|                             | (105.91, 146.51) | (89.32, 126.12)  |                      |        | (1596.44, 2169.85) | (1562.98, 2153.78) | (-0.12, 0.05)      |        | (941.34, 1056.16)  | (466.89, 685.54)   | (-2.13, -1.36) | (14.78, 16.28) | (6.31, 9.83)   | (-2.50, -1.50)    | <0.001 |
| Tropical Latin America      | 167.95           | 134.55           | -0.76 (-0.82, -0.71) | <0.001 | 2839.08            | 2740.07            | -0.12              | <0.001 | 1716.12            | 773.18             | -2.67          | 27.29          | 10.81          | -3.10             |        |
|                             | (140.93, 199.48) | (110.63, 162.50) |                      |        | (2352.21, 3383.12) | (2264.28, 3301.59) | (-0.16, -0.07)     |        | (1624.00, 1810.03) | (704.50, 849.21)   | (-2.82, -2.52) | (26.09, 28.55) | (10.11, 11.61) | (-3.28, -2.92)    | <0.001 |
| Central Sub-Saharan Africa  | 171.04           | 157.27           | -0.29 (-0.30, -0.28) | <0.001 | 2996.05            | 3022.85            | 0.05 (-0.03, 0.12) | 0.209  | 1361.12            | 947.79             | -1.23          | 20.61          | 13.36          | -1.47             |        |
|                             | (140.47, 204.06) | (126.47, 190.27) |                      |        | (2353.76, 3767.56) | (2372.13, 3856.28) |                    |        | (949.87, 1820.47)  | (684.25, 1233.96)  | (-1.34, -1.11) | (13.59, 28.93) | (8.93, 18.43)  | (-1.61, -1.34)    | <0.001 |
| Western Europe              | 102.18           | 95.30            | -0.23 (-0.27, -0.20) | <0.001 | 1387.77            | 1354.80            | -0.06              | 0.141  | 502.45             | 264.63             | -2.18          | 7.13           | 3.04           | -2.87             |        |
|                             | (85.30, 120.69)  | (78.85, 112.77)  |                      |        | (1107.25, 1764.54) | (1090.21, 1704.90) | (-0.13, 0.02)      |        | (465.76, 542.67)   | (233.40, 301.31)   | (-2.33, -2.02) | (6.85, 7.39)   | (2.87, 3.24)   | (-3.07, -2.67)    | <0.001 |
| High-income North America   | 197.85           | 201.79           | 0.07 (0.02, 0.12)    | 0.005  | 2615.54            | 2640.47            | 0.09 (-0.12, 0.30) | 0.412  | 657.83             | 609.45             | -0.16          | 8.83           | 7.91           | -0.34             |        |
|                             | (177.73, 219.72) | (182.10, 223.07) |                      |        | (2192.69, 3255.39) | (2288.72, 3122.76) |                    |        | (603.38, 721.95)   | (552.71, 674.29)   | (-0.59, 0.28)  | (8.56, 9.11)   | (7.48, 8.41)   | (-1.01, 0.34)     | 0.332  |
| Central Asia                | 159.93           | 149.89           | -0.22 (-0.24, -0.20) | <0.001 | 2005.39            | 2015.85            | 0.03 (-0.01, 0.06) | 0.150  | 1564.45            | 1313.39            | -0.61          | 24.52          | 20.23          | -0.68             |        |
|                             | (138.04, 185.34) | (127.93, 175.63) |                      |        | (1734.53, 2302.75) | (1711.68, 2354.53) |                    |        | (1479.60, 1649.86) | (1155.19, 1517.60) | (-1.01, -0.20) | (23.22, 25.85) | (17.53, 23.69) | (-1.14, -0.21)    | 0.005  |
| Eastern Europe              | 136.41           | 142.25           | 0.14 (0.13, 0.16)    | <0.001 | 1209.47            | 1304.58            | 0.29 (0.15, 0.43)  | <0.001 | 816.62             | 1158.93            | 1.16           | 12.09          | 17.92          | 1.47 (0.59, 2.36) | 0.001  |
|                             | (117.02, 158.63) | (122.15, 164.98) |                      |        | (1079.34, 1347.44) | (1165.22, 1456.92) |                    |        | (748.23, 871.88)   | (950.17, 1404.87)  | (0.23, 2.10)   | (11.16, 12.64) | (14.43, 22.30) |                   |        |
| Southern Sub-Saharan Africa | 178.37           | 159.03           | -0.40 (-0.45, -0.35) | <0.001 | 2937.41            | 2857.39            | -0.09              | <0.001 | 1943.12            | 877.89             | -2.55          | 30.69          | 12.15          | -2.98             |        |
|                             | (147.27, 212.98) | (129.81, 191.80) |                      |        | (2413.98, 3582.37) | (2321.77, 3493.36) | (-0.12, -0.05)     |        | (1575.44, 2242.53) | (606.92, 1214.22)  | (-4.27, -0.81) | (23.88, 35.86) | (7.26, 18.02)  | (-5.05, -0.88)    | 0.006  |
| High-income Asia Pacific    | 139.13           | 137.05           | -0.05 (-0.13, 0.04)  | 0.268  | 1456.59            | 1502.23            | 0.12 (0.00, 0.23)  | 0.043  | 633.17             | 241.38             | -3.25          | 9.37           | 2.51           | -4.44             |        |
|                             | (124.96, 155.67) | (122.35, 153.17) |                      |        | (1251.48, 1717.88) | (1307.43, 1764.74) |                    |        | (576.51, 687.73)   | (209.18, 280.64)   | (-3.44, -3.06) | (8.51, 10.18)  | (2.31, 2.76)   | (-4.73, -4.14)    | <0.001 |
| Central Europe              | 113.13           | 107.75           | -0.16 (-0.20, -0.12) | <0.001 | 1574.03            | 1604.24            | 0.07 (-0.10, 0.24) | 0.426  | 951.89             | 462.28             | -2.41          | 14.01          | 5.45           | -3.23             |        |
|                             | (97.03, 131.47)  | (92.34, 125.53)  |                      |        | (1318.26, 1922.39) | (1342.41, 1952.94) |                    |        | (896.84, 1014.30)  | (391.23, 538.99)   | (-2.59, -2.23) | (13.53, 14.58) | (4.57, 6.51)   | (-3.48, -2.97)    | <0.001 |
| Andean Latin America        | 135.80           | 119.22           | -0.45 (-0.46, -0.44) | <0.001 | 2416.86            | 2432.13            | 0.02 (-0.04, 0.08) | 0.492  | 1335.55            | 657.70             | -2.39          | 20.96          | 9.02           | -2.88             |        |
|                             | (112.72, 131.47) | (97.66, 125.53)  |                      |        | (1995.15, 2416.86) | (1971.32, 2432.13) |                    |        | (1110.17, 1335.55) | (509.77, 657.70)   | (-3.41, -2.39) | (17.15, 20.96) | (6.51, 9.02)   | (-4.37, -2.88)    | <0.001 |



|                        |          |          |               |        |           |           |              |        |           |           |         |        |         |         |         |        |
|------------------------|----------|----------|---------------|--------|-----------|-----------|--------------|--------|-----------|-----------|---------|--------|---------|---------|---------|--------|
|                        | 162.10)  | 144.22)  |               |        | 2898.44)  | 2928.28)  |              |        | 1580.07)  | 836.53)   | -1.37)  | 25.15) | 12.01)  | -1.37)  |         |        |
| Caribbean              | 209.33   | 220.34   | 0.19 (0.15,   | <0.001 | 2605.64   | 2683.30   | 0.11 (0.02,  | 0.013  | 1794.01   | 1510.34   | -0.59   | 29.10  | 24.02   | -0.66   |         |        |
|                        | (178.28, | (187.08, | 0.22)         |        | (2219.22, | (2250.85, | 0.19)        |        | (1449.29, | (1080.50, | (-0.90, | <0.001 | (22.82, | (16.36, | (-1.02, | <0.001 |
| Southern Latin America | 242.37)  | 256.59)  |               |        | 3024.36)  | 3144.23)  |              |        | 2154.19)  | 2069.69)  | -0.27)  | 35.08) | 33.96)  | -0.29)  |         |        |
|                        | 105.32   | 97.53    | -0.26 (-0.29, | <0.001 | 1640.58   | 1849.45   | 0.43 (0.38,  | <0.001 | 1007.27   | 498.58    | -2.30   | 15.57  | 6.45    | -2.89   |         |        |
| Oceania                | (90.01,  | (82.12,  | -0.23)        |        | (1282.25, | (1508.61, | 0.48)        |        | (924.05,  | (433.33,  | (-2.72, | <0.001 | (14.28, | (5.64,  | (-3.42, | <0.001 |
|                        | 123.19)  | 115.80)  |               |        | 2052.03)  | 2269.84)  |              |        | 1093.20)  | 564.29)   | -1.88)  | 16.85) | 7.29)   | -2.35)  |         |        |
| Australasia            | 202.06   | 212.62   | 0.18 (0.16,   | <0.001 | 1962.93   | 2024.24   | 0.11 (0.07,  | <0.001 | 2735.21   | 2743.80   | -0.04   | 44.21  | 44.28   | -0.05   |         |        |
|                        | (178.88, | (188.84, | 0.19)         |        | (1706.86, | (1748.93, | 0.15)        |        | (1978.62, | (1933.45, | (-0.18, | 0.574  | (30.94, | (30.10, | (-0.20, | 0.527  |
| Men                    | 226.20)  | 239.13)  |               |        | 2290.15)  | 2379.37)  |              |        | 3628.51)  | 3699.94)  | 0.10)   | 59.90) | 61.42)  | 0.10)   |         |        |
|                        | 89.43    | 87.74    | -0.07 (-0.10, | <0.001 | 987.46    | 1000.16   | 0.05 (-0.05, | 0.306  | 457.92    | 271.66    | -1.78   | 6.44   | 3.24    | -2.32   |         |        |
| Global                 | (73.08,  | (72.81,  | -0.05)        |        | (790.02,  | (793.64,  | 0.16)        |        | (409.95,  | (231.89,  | (-2.26, | <0.001 | (5.85,  | (2.74,  | (-2.91, | <0.001 |
|                        | 106.82)  | 103.97)  |               |        | 1237.10)  | 1233.55)  |              |        | 506.46)   | 317.60)   | -1.30)  | 7.05)  | 3.81)   | -1.73)  |         |        |
| <b>SDI category</b>    |          |          |               |        |           |           |              |        |           |           |         |        |         |         |         |        |
| High                   | 151.84   | 148.73   | -0.07 (-0.10, | <0.001 | 1471.73   | 1583.69   | 0.27 (0.20,  | <0.001 | 1851.30   | 1634.11   | -0.42   | 30.72  | 26.82   | -0.46   |         |        |
|                        | (131.60, | (128.19, | -0.04)        |        | (1284.00, | (1370.77, | 0.35)        |        | (1743.61, | (1504.97, | (-0.56, | <0.001 | (28.96, | (24.64, | (-0.61, | <0.001 |
| High-middle            | 174.73)  | 171.07)  |               |        | 1687.15)  | 1828.81)  |              |        | 1961.35)  | 1780.73)  | -0.28)  | 32.56) | 29.30)  | -0.31)  |         |        |
|                        | 158.15   | 150.75   | -0.17 (-0.20, | <0.001 | 1203.24   | 1273.74   | 0.23 (-0.03, | 0.087  | 1055.93   | 729.68    | -1.29   | 17.16  | 11.31   | -1.45   |         |        |
| Middle                 | (136.10, | (131.86, | -0.15)        |        | (1074.40, | (1152.15, | 0.48)        |        | (1014.64, | (666.81,  | (-1.61, | <0.001 | (16.62, | (10.29, | (-1.92, | <0.001 |
|                        | 182.26)  | 171.40)  |               |        | 1347.46)  | 1402.62)  |              |        | 1098.99)  | 805.93)   | -0.97)  | 17.79) | 12.53)  | -0.97)  |         |        |
| Low-middle             | 143.72   | 131.16   | -0.32 (-0.34, | <0.001 | 1157.89   | 1160.55   | 0.01 (-0.02, | 0.403  | 1960.69   | 1602.81   | -0.72   | 32.84  | 26.58   | -0.76   |         |        |
|                        | (124.93, | (113.63, | -0.30)        |        | (1025.38, | (1030.14, | 0.04)        |        | (1836.07, | (1468.76, | (-1.33, | 0.020  | (30.71, | (24.23, | (-1.39, | 0.017  |
| Low                    | 165.24)  | 151.95)  |               |        | 1307.42)  | 1310.90)  |              |        | 2092.67)  | 1739.62)  | -0.12)  | 35.01) | 28.91)  | -0.14)  |         |        |
|                        | 147.88   | 145.18   | -0.07 (-0.09, | <0.001 | 1553.41   | 1587.87   | 0.09 (0.05,  | <0.001 | 1921.45   | 1656.30   | -0.54   | 31.73  | 27.07   | -0.58   |         |        |
| Low-middle             | (126.84, | (124.37, | -0.04)        |        | (1340.86, | (1371.72, | 0.14)        |        | (1779.73, | (1497.21, | (-0.77, | <0.001 | (29.36, | (24.35, | (-0.82, | <0.001 |
|                        | 171.51)  | 168.44)  |               |        | 1807.52)  | 1860.07)  |              |        | 2078.70)  | 1824.96)  | -0.31)  | 34.38) | 29.91)  | -0.34)  |         |        |
| Low                    | 154.05   | 156.88   | 0.05 (-0.03,  | 0.197  | 1701.17   | 1801.88   | 0.21 (0.13,  | <0.001 | 2300.78   | 2096.47   | -0.28   | 38.53  | 34.87   | -0.30   |         |        |
|                        | (131.02, | (132.93, | 0.14)         |        | (1431.28, | (1511.40, | 0.30)        |        | (2082.02, | (1854.60, | (-0.57, | 0.060  | (34.72, | (30.63, | (-0.60, | 0.043  |
| Low                    | 177.38)  | 181.47)  |               |        | 2018.27)  | 2150.97)  |              |        | 2527.07)  | 2376.06)  | 0.01)   | 42.46) | 39.78)  | -0.01)  |         |        |
|                        | 173.74   | 172.64   | -0.02 (-0.04, | 0.080  | 2149.79   | 2246.30   | 0.16 (0.11,  | <0.001 | 1895.61   | 1700.44   | -0.43   | 31.07  | 27.55   | -0.48   |         |        |
|                        | (147.37, | (144.59, | 0.00)         |        | (1781.54, | (1860.05, | 0.20)        |        | (1662.77, | (1465.66, | (-0.56, | <0.001 | (27.01, | (23.45, | (-0.61, | <0.001 |



|                             |                  |                  |                      |        |                    |                    |                    |        |                    |                    |       |        |                |                |                    |        |
|-----------------------------|------------------|------------------|----------------------|--------|--------------------|--------------------|--------------------|--------|--------------------|--------------------|-------|--------|----------------|----------------|--------------------|--------|
| High-income North America   | 186.57           | 179.95           | -0.13 (-0.15, -0.11) | <0.001 | 1652.98            | 1758.65            | 0.24 (-0.13, 0.61) | 0.203  | 1055.81            | 862.21             | -0.71 | 0.002  | 16.78          | 13.18          | -0.81              | 0.009  |
|                             | (160.82, 215.26) | (159.40, 202.50) |                      |        | (1462.56, 1872.55) | (1568.73, 1968.51) |                    |        | (1013.15, 1103.29) | (768.93, 925.22)   |       |        | (16.28, 17.33) | (11.77, 14.10) | (-1.41, -0.21)     |        |
| Central Asia                | 199.10           | 192.80           | -0.11 (-0.14, -0.08) | <0.001 | 1724.20            | 1788.58            | 0.13 (0.10, 0.15)  | <0.001 | 2736.11            | 2515.63            | -0.32 | 0.336  | 46.04          | 42.21          | -0.33              | 0.345  |
|                             | (174.52, 227.56) | (167.10, 220.55) |                      |        | (1490.01, 2011.00) | (1522.39, 2098.48) |                    |        | (2590.04, 2882.26) | (2262.64, 2789.71) |       |        | (43.60, 48.47) | (37.78, 46.99) | (-1.00, 0.35)      |        |
| Eastern Europe              | 182.32           | 201.04           | 0.34 (0.32, 0.35)    | <0.001 | 901.42             | 1006.17            | 0.38 (0.36, 0.40)  | <0.001 | 2875.85            | 4119.44            | 1.13  | 0.027  | 49.35          | 71.42          | 1.16 (0.16, 2.18)  | 0.024  |
|                             | (157.90, 208.64) | (177.18, 227.61) |                      |        | (809.04, 1003.67)  | (908.58, 1116.78)  |                    |        | (2761.76, 2954.80) | (3649.84, 4605.61) |       |        | (47.42, 50.78) | (63.12, 79.94) |                    |        |
| Southern Sub-Saharan Africa | 204.02           | 192.64           | -0.19 (-0.21, -0.18) | <0.001 | 2558.49            | 2572.19            | 0.03 (-0.01, 0.06) | 0.119  | 1966.07            | 1315.17            | -1.52 | 0.054  | 31.91          | 20.50          | -1.67              | 0.056  |
|                             | (170.51, 238.00) | (160.09, 227.03) |                      |        | (2128.25, 3108.46) | (2134.44, 3125.43) |                    |        | (1660.88, 2317.69) | (1046.64, 1617.13) |       |        | (26.69, 38.34) | (15.84, 25.76) | (-3.34, 0.04)      |        |
| High-income Asia Pacific    | 171.95           | 174.40           | 0.05 (0.03, 0.08)    | <0.001 | 1143.05            | 1238.90            | 0.28 (0.16, 0.40)  | <0.001 | 1110.79            | 463.28             | -3.02 | <0.001 | 18.35          | 6.94           | -3.34              | <0.001 |
|                             | (153.53, 191.77) | (156.15, 194.74) |                      |        | (1024.04, 1286.87) | (1111.46, 1375.29) |                    |        | (996.23, 1204.43)  | (423.81, 507.54)   |       |        | (16.38, 19.90) | (6.43, 7.58)   | (-3.66, -3.01)     |        |
| Central Europe              | 144.27           | 138.74           | -0.14 (-0.16, -0.12) | <0.001 | 1042.84            | 1067.13            | 0.09 (0.03, 0.15)  | 0.003  | 2266.28            | 964.48             | -2.96 | <0.001 | 38.44          | 15.63          | -3.18              | <0.001 |
|                             | (125.35, 165.54) | (120.52, 158.86) |                      |        | (915.15, 1191.23)  | (933.17, 1211.82)  |                    |        | (2184.36, 2353.03) | (855.77, 1069.45)  |       |        | (37.18, 39.90) | (13.86, 17.37) | (-3.57, -2.79)     |        |
| Andean Latin America        | 135.94           | 128.72           | -0.19 (-0.20, -0.18) | <0.001 | 1915.01            | 1939.35            | 0.04 (0.01, 0.07)  | 0.009  | 1571.03            | 1032.12            | -1.45 | <0.001 | 25.78          | 16.27          | -1.59              | <0.001 |
|                             | (114.92, 160.85) | (108.26, 153.21) |                      |        | (1574.55, 2330.73) | (1598.15, 2333.75) |                    |        | (1322.45, 1850.39) | (811.07, 1291.19)  |       |        | (21.43, 30.55) | (12.34, 20.70) | (-2.00, -1.18)     |        |
| Caribbean                   | 207.76           | 216.05           | 0.14 (0.12, 0.15)    | <0.001 | 2099.85            | 2171.61            | 0.12 (0.05, 0.18)  | 0.001  | 1804.05            | 1520.91            | -0.51 | 0.002  | 29.97          | 24.94          | -0.55              | 0.002  |
|                             | (176.09, 241.75) | (182.84, 251.33) |                      |        | (1779.49, 2473.62) | (1832.88, 2550.01) |                    |        | (1620.23, 2049.25) | (1183.24, 1900.16) |       |        | (26.73, 34.26) | (18.97, 31.73) | (-0.89, -0.20)     |        |
| Southern Latin America      | 121.98           | 118.60           | -0.10 (-0.12, -0.07) | <0.001 | 1122.67            | 1296.61            | 0.49 (0.39, 0.58)  | <0.001 | 1438.46            | 794.57             | -2.01 | <0.001 | 23.94          | 12.48          | -2.21              | <0.001 |
|                             | (104.56, 140.48) | (101.20, 138.03) |                      |        | (922.05, 1364.66)  | (1054.61, 1566.50) |                    |        | (1328.36, 1563.20) | (693.37, 893.12)   |       |        | (22.05, 26.06) | (10.71, 14.16) | (-2.64, -1.77)     |        |
| Oceania                     | 203.75           | 208.55           | 0.08 (0.07, 0.09)    | <0.001 | 1717.09            | 1763.92            | 0.09 (0.05, 0.14)  | <0.001 | 4103.24            | 4179.80            | 0.02  | 0.812  | 69.38          | 70.72          | 0.02 (-0.13, 0.17) | 0.813  |
|                             | (180.35, 231.24) | (183.76, 234.82) |                      |        | (1506.36, 1998.35) | (1509.52, 2066.19) |                    |        | (2989.87, 5441.92) | (3077.46, 5578.79) |       |        | (49.68, 92.51) | (50.90, 95.44) |                    |        |
| Australasia                 | 189.89           | 187.62           | -0.04 (-0.08, 0.00)  | 0.052  | 873.62             | 968.25             | 0.28 (0.19, 0.38)  | <0.001 | 817.06             | 472.91             | -1.88 | <0.001 | 13.40          | 7.45           | -2.02              | <0.001 |
|                             | (155.48, 230.28) | (153.94, 225.94) |                      |        | (720.00, 1025.52)  | (821.82, 1142.51)  |                    |        | (745.39, 889.25)   | (399.50, 550.53)   |       |        | (12.25, 14.63) | (6.23, 8.76)   | (-2.42, -1.60)     |        |

| 35-39 years                  |          |          |               |        |           |           |              |        |           |           |         |        |         |         |         |        |
|------------------------------|----------|----------|---------------|--------|-----------|-----------|--------------|--------|-----------|-----------|---------|--------|---------|---------|---------|--------|
| Women                        |          |          |               |        |           |           |              |        |           |           |         |        |         |         |         |        |
|                              | 166.94   | 155.19   |               |        | 2380.40   | 2455.45   |              |        | 1972.85   | 1359.07   | -1.27   |        | 34.40   | 22.58   | -1.43   |        |
| Global                       | (143.63, | (132.90, | -0.25 (-0.30, | <0.001 | (2138.49, | (2187.32, | 0.11 (0.08,  | <0.001 | (1821.21, | (1225.77, | (-1.44, | <0.001 | (31.70, | (20.13, | (-1.62, | <0.001 |
|                              | 194.78)  | 182.38)  | -0.20)        |        | 2692.48)  | 2807.78)  | 0.14)        |        | 2134.09)  | 1497.68)  | -1.10)  |        | 37.51)  | 24.85)  | -1.24)  |        |
| SDI category                 |          |          |               |        |           |           |              |        |           |           |         |        |         |         |         |        |
|                              | 181.27   | 171.36   |               |        | 2506.73   | 2491.97   |              |        | 898.39    | 659.43    | -1.06   |        | 14.32   | 9.72    | -1.28   |        |
| High                         | (159.76, | (152.90, | -0.21 (-0.28, | <0.001 | (2218.87, | (2252.95, | 0.01 (-0.16, | 0.940  | (847.66,  | (598.58,  | (-1.30, | <0.001 | (13.91, | (8.92,  | (-1.49, | <0.001 |
|                              | 206.48)  | 193.19)  | -0.13)        |        | 2867.31)  | 2758.60)  | 0.17)        |        | 953.44)   | 728.79)   | -0.82)  |        | 14.78)  | 10.63)  | -1.07)  |        |
|                              | 156.16   | 134.92   |               |        | 1981.65   | 1964.53   |              |        | 1605.50   | 983.84    | -1.59   |        | 27.43   | 15.62   | -1.81   |        |
| High-middle                  | (134.77, | (115.48, | -0.50 (-0.53, | <0.001 | (1788.01, | (1758.26, | (-0.05,      | 0.055  | (1464.47, | (887.86,  | (-1.88, | <0.001 | (24.95, | (13.98, | (-2.16, | <0.001 |
|                              | 182.40)  | 158.81)  | -0.47)        |        | 2200.86)  | 2192.62)  | 0.00)        |        | 1763.55)  | 1089.22)  | -1.30)  |        | 30.37)  | 17.37)  | -1.47)  |        |
|                              | 160.26   | 147.16   |               |        | 2333.73   | 2345.88   |              |        | 2286.51   | 1282.42   | -1.98   |        | 40.10   | 20.91   | -2.23   |        |
| Middle                       | (135.91, | (123.72, | -0.29 (-0.33, | <0.001 | (2080.02, | (2075.81, | 0.02 (0.00,  | 0.052  | (2055.76, | (1141.22, | (-2.13, | <0.001 | (35.74, | (18.38, | (-2.36, | <0.001 |
|                              | 190.53)  | 175.79)  | -0.26)        |        | 2649.49)  | 2683.30)  | 0.04)        |        | 2548.76)  | 1426.87)  | -1.82)  |        | 44.97)  | 23.39)  | -2.10)  |        |
|                              | 169.64   | 164.64   |               |        | 2614.43   | 2707.17   |              |        | 2665.12   | 1927.39   | -1.11   |        | 47.75   | 33.44   | -1.22   |        |
| Low-middle                   | (143.12, | (138.11, | -0.10 (-0.13, | <0.001 | (2284.66, | (2352.75, | 0.13 (0.04,  | 0.006  | (2356.35, | (1647.97, | (-1.43, | <0.001 | (42.08, | (28.12, | (-1.57, | <0.001 |
|                              | 200.38)  | 195.33)  | -0.08)        |        | 3011.42)  | 3140.76)  | 0.22)        |        | 2992.11)  | 2216.04)  | -0.79)  |        | 54.05)  | 38.76)  | -0.87)  |        |
|                              | 189.07   | 176.14   |               |        | 2993.37   | 3083.73   |              |        | 2684.52   | 1913.43   | -1.19   |        | 47.76   | 32.84   | -1.32   |        |
| Low                          | (159.40, | (147.28, | -0.24 (-0.26, | <0.001 | (2547.85, | (2606.70, | 0.12 (0.04,  | 0.002  | (2318.49, | (1638.04, | (-1.36, | <0.001 | (40.83, | (27.47, | (-1.52, | <0.001 |
|                              | 223.31)  | 209.85)  | -0.23)        |        | 3613.26)  | 3749.30)  | 0.19)        |        | 3091.71)  | 2223.55)  | -1.01)  |        | 55.43)  | 38.69)  | -1.12)  |        |
| 21 GBD region                |          |          |               |        |           |           |              |        |           |           |         |        |         |         |         |        |
|                              | 164.00   | 160.90   |               |        | 2562.41   | 2572.59   |              |        | 2538.07   | 1958.90   | -1.03   |        | 45.53   | 34.32   | -1.11   |        |
| South Asia                   | (136.71, | (133.98, | -0.07 (-0.10, | <0.001 | (2221.87, | (2228.95, | 0.04 (-0.09, | 0.587  | (2227.10, | (1618.94, | (-1.62, | 0.001  | (39.43, | (27.76, | (-1.75, | 0.001  |
|                              | 195.39)  | 192.60)  | -0.04)        |        | 2968.71)  | 2977.18)  | 0.16)        |        | 2910.43)  | 2331.62)  | -0.43)  |        | 52.49)  | 41.65)  | -0.47)  |        |
|                              | 143.41   | 122.24   |               |        | 2029.43   | 1954.08   |              |        | 2026.55   | 817.11    | -3.08   |        | 35.17   | 12.08   | -3.62   |        |
| East Asia                    | (120.92, | (102.78, | -0.57 (-0.62, | <0.001 | (1789.88, | (1725.51, | (-0.20,      | <0.001 | (1650.47, | (665.86,  | (-3.26, | <0.001 | (27.88, | (9.40,  | (-3.84, | <0.001 |
|                              | 171.39)  | 146.20)  | -0.52)        |        | 2296.79)  | 2216.44)  | -0.07)       |        | 2442.48)  | 988.31)   | -2.89)  |        | 43.29)  | 15.42)  | -3.40)  |        |
|                              | 207.08   | 195.26   |               |        | 2837.33   | 2774.46   |              |        | 3107.45   | 1797.78   | -1.87   |        | 55.68   | 30.52   | -2.05   |        |
| North Africa and Middle East | (176.39, | (165.97, | -0.20 (-0.22, | <0.001 | (2481.51, | (2442.11, | (-0.13,      | 0.022  | (2751.34, | (1445.56, | (-2.02, | <0.001 | (49.01, | (23.77, | (-2.21, | <0.001 |
|                              | 244.63)  | 232.88)  | -0.18)        |        | 3324.59)  | 3206.20)  | -0.01)       |        | 3483.05)  | 2143.89)  | -1.72)  |        | 62.67)  | 37.23)  | -1.89)  |        |

|                     |          |          |               |        |           |           |             |        |           |           |         |        |         |         |             |        |
|---------------------|----------|----------|---------------|--------|-----------|-----------|-------------|--------|-----------|-----------|---------|--------|---------|---------|-------------|--------|
| Western             | 175.49   | 166.54   | -0.18 (-0.20, |        | 3042.42   | 3183.89   | 0.17 (0.12, |        | 1954.05   | 1399.35   | -1.15   |        | 33.56   | 22.75   | -1.33       |        |
| Sub-Saharan Africa  | (147.59, | (139.21, | -0.16)        | <0.001 | (2518.66, | (2585.90, | 0.22)       | <0.001 | (1579.22, | (1116.47, | (-1.27, | <0.001 | (26.24, | (17.43, | (-1.44,     | <0.001 |
|                     | 207.67)  | 198.23)  |               |        | 3865.74)  | 4131.86)  |             |        | 2411.82)  | 1740.23)  | -1.03)  |        | 42.13)  | 29.16)  | -1.22)      |        |
|                     | 156.57   | 150.23   | -0.14 (-0.16, |        | 1920.07   | 1889.55   | -0.04       |        | 2484.17   | 1714.36   | -1.27   |        | 43.50   | 28.76   | -1.41       |        |
| Southeast Asia      | (133.31, | (127.37, | -0.13)        | <0.001 | (1733.63, | (1698.98, | (-0.10,     | 0.207  | (2166.02, | (1445.79, | (-1.37, | <0.001 | (37.65, | (23.72, | (-1.54,     | <0.001 |
|                     | 187.03)  | 179.82)  |               |        | 2143.98)  | 2108.60)  | 0.02)       |        | 2850.69)  | 2021.11)  | -1.16)  |        | 50.31)  | 34.59)  | -1.28)      |        |
|                     | 198.91   | 164.85   | -0.65 (-0.68, |        | 3611.45   | 3691.02   |             |        | 2397.15   | 1394.58   | -1.85   |        | 41.42   | 22.16   | -2.13       |        |
| Eastern Sub-Saharan | (166.19, | (134.60, | -0.62)        | <0.001 | (2987.50, | (3021.98, | 0.10)       | <0.001 | (1981.12, | (1155.59, | (-1.92, | <0.001 | (33.09, | (17.68, | (-2.23,     | <0.001 |
| Africa              | 234.85)  | 198.68)  |               |        | 4525.89)  | 4664.91)  |             |        | 2890.23)  | 1671.07)  | -1.78)  |        | 50.88)  | 27.24)  | -2.03)      |        |
|                     | 153.34   | 123.29   | -0.75 (-0.80, |        | 2294.88   | 2173.17   | -0.17       |        | 1527.91   | 826.95    | -1.94   |        | 26.67   | 13.31   | -2.15       |        |
| Central Latin       | (129.65, | (101.87, | -0.71)        | <0.001 | (2030.75, | (1906.87, | (-0.28,     | 0.002  | (1457.78, | (689.89,  | (-2.28, | <0.001 | (25.59, | (10.76, | (-2.55,     | <0.001 |
| America             | 184.14)  | 149.43)  |               |        | 2619.11)  | 2496.15)  | -0.06)      |        | 1601.03)  | 994.07)   | -1.59)  |        | 27.75)  | 16.40)  | -1.75)      |        |
|                     | 204.21   | 144.41   | -1.19 (-1.29, |        | 3302.66   | 3067.06   | -0.25       |        | 2737.74   | 1247.41   | -2.64   |        | 49.00   | 20.59   | -2.90       |        |
| Tropical Latin      | (170.28, | (120.72, | -1.09)        | <0.001 | (2864.35, | (2632.35, | (-0.27,     | <0.001 | (2616.84, | (1149.55, | (-2.85, | <0.001 | (46.97, | (19.24, | (-3.13,     | <0.001 |
| America             | 244.47)  | 172.09)  |               |        | 3817.25)  | 3588.89)  | -0.24)      |        | 2855.73)  | 1340.23)  | -2.43)  |        | 51.07)  | 21.99)  | -2.66)      |        |
|                     | 192.64   | 170.03   | -0.43 (-0.44, |        | 3445.27   | 3392.96   | -0.03       |        | 2144.12   | 1517.20   | -1.21   |        | 36.98   | 25.04   | -1.36       |        |
| Central Sub-Saharan | (161.57, | (139.33, | -0.42)        | <0.001 | (2821.54, | (2729.46, | (-0.10,     | 0.336  | (1547.29, | (1086.64, | (-1.32, | <0.001 | (25.30, | (16.89, | (-1.49,     | <0.001 |
| Africa              | 229.26)  | 204.90)  |               |        | 4330.99)  | 4344.00)  | 0.03)       |        | 2942.01)  | 2085.84)  | -1.09)  |        | 52.44)  | 35.90)  | -1.23)      |        |
|                     | 112.77   | 99.05    | -0.45 (-0.47, |        | 1584.21   | 1525.46   | -0.11       |        | 734.45    | 360.62    | -2.44   |        | 12.07   | 5.06    | -2.98       |        |
| Western Europe      | (95.76,  | (83.58,  | -0.42)        | <0.001 | (1352.13, | (1325.97, | (-0.20,     | 0.016  | (696.41,  | (327.78,  | (-2.55, | <0.001 | (11.66, | (4.78,  | (-3.08,     | <0.001 |
|                     | 133.58)  | 117.13)  |               |        | 1868.99)  | 1763.11)  | -0.02)      |        | 780.22)   | 396.64)   | -2.34)  |        | 12.47)  | 5.40)   | -2.89)      |        |
|                     | 259.19   | 242.58   | -0.26 (-0.34, |        | 3740.83   | 3732.07   | -0.00       |        | 967.31    | 870.56    | -0.36   |        | 14.88   | 13.07   | -0.49       |        |
| High-income North   | (230.75, | (221.37, | -0.19)        | <0.001 | (3298.93, | (3362.79, | (-0.09,     | 0.990  | (902.90,  | (804.41,  | (-0.66, | 0.016  | (14.49, | (12.49, | (-0.84,     | 0.007  |
| America             | 294.86)  | 267.03)  |               |        | 4415.99)  | 4174.89)  | 0.09)       |        | 1043.22)  | 942.61)   | -0.07)  |        | 15.29)  | 13.61)  | -0.14)      |        |
|                     | 189.65   | 172.25   | -0.33 (-0.35, |        | 2504.69   | 2477.22   | -0.03       |        | 2245.09   | 1890.97   | -0.69   |        | 39.10   | 32.48   | -0.75       |        |
| Central Asia        | (164.70, | (147.94, | -0.31)        | <0.001 | (2246.01, | (2209.52, | (-0.07,     | 0.103  | (2115.65, | (1674.53, | (-1.01, | <0.001 | (36.83, | (28.31, | (-1.09,     | <0.001 |
|                     | 221.01)  | 203.62)  |               |        | 2810.31)  | 2794.38)  | 0.01)       |        | 2363.77)  | 2166.30)  | -0.37)  |        | 41.09)  | 37.58)  | -0.40)      |        |
|                     | 187.64   | 187.71   | -0.00 (-0.02, |        | 1875.19   | 1964.31   |             |        | 1425.44   | 1915.35   | 1.44    |        | 24.00   | 33.27   |             |        |
| Eastern Europe      | (160.89, | (161.82, | 0.01)         | 0.838  | (1706.43, | (1780.47, | 0.18 (0.07, | 0.002  | (1325.00, | (1589.91, | (0.52,  | 0.002  | (22.36, | (27.03, | 1.63 (0.57, | 0.003  |
|                     | 219.91)  | 219.57)  |               |        | 2073.14)  | 2175.70)  | 0.30)       |        | 1507.13)  | 2299.86)  | 2.37)   |        | 25.11)  | 40.86)  | 2.70)       |        |
|                     | 197.43   | 168.92   | -0.55 (-0.61, |        | 3300.40   | 3139.88   | -0.17       |        | 2469.91   | 1101.50   | -2.63   |        | 43.12   | 17.14   | -3.00       |        |
| Southern            | (162.32, | (137.58, | -0.48)        | <0.001 | (2831.46, | (2630.10, | (-0.18,     | <0.001 | (2053.14, | (793.90,  | (-3.99, | <0.001 | (34.89, | (11.57, | (-4.61,     | <0.001 |
| Sub-Saharan Africa  | 236.13)  | 203.87)  |               |        | 3907.87)  | 3764.21)  | -0.16)      |        | 2831.98)  | 1450.17)  | -1.24)  |        | 49.96)  | 23.51)  | -1.36)      |        |

|                          |                  |                  |                      |        |                    |                    |                    |        |                    |                    |                |                |                |                   |        |
|--------------------------|------------------|------------------|----------------------|--------|--------------------|--------------------|--------------------|--------|--------------------|--------------------|----------------|----------------|----------------|-------------------|--------|
| High-income Asia Pacific | 183.99           | 172.17           | -0.22 (-0.26, -0.19) | <0.001 | 2157.18            | 2102.95            | -0.06              | 0.094  | 827.52             | 353.76             | -2.90          | 13.37          | 4.35           | -3.85             |        |
|                          | (165.39, 208.26) | (153.04, 195.05) |                      |        | (1945.06, 2394.18) | (1919.09, 2309.23) | (-0.14, 0.01)      |        | (758.98, 889.68)   | (309.64, 399.90)   | (-3.24, -2.56) | (12.49, 14.23) | (4.02, 4.78)   | (-4.22, -3.47)    | <0.001 |
| Central Europe           | 152.49           | 135.66           | -0.41 (-0.43, -0.39) | <0.001 | 1973.16            | 1972.39            | 0.02 (-0.10, 0.15) | 0.704  | 1598.96            | 691.50             | -2.91          | 27.03          | 9.81           | -3.51             |        |
|                          | (131.53, 177.58) | (116.72, 159.26) |                      |        | (1752.21, 2227.74) | (1743.52, 2217.92) |                    |        | (1520.30, 1680.69) | (586.13, 800.98)   | (-3.22, -2.60) | (26.16, 27.99) | (8.17, 11.61)  | (-3.91, -3.10)    | <0.001 |
| Andean Latin America     | 144.79           | 120.87           | -0.62 (-0.63, -0.61) | <0.001 | 2710.42            | 2622.70            | -0.10              | <0.001 | 1838.81            | 853.86             | -2.57          | 32.27          | 13.37          | -2.95             |        |
|                          | (121.73, 170.74) | (99.19, 146.14)  |                      |        | (2314.30, 3175.61) | (2215.10, 3058.59) | (-0.13, -0.07)     |        | (1545.02, 2154.30) | (660.69, 1085.50)  | (-3.54, -1.58) | (26.74, 38.16) | (9.82, 17.73)  | (-4.09, -1.80)    | <0.001 |
| Caribbean                | 239.58           | 248.30           | 0.13 (0.10, 0.15)    | <0.001 | 3161.32            | 3222.87            | 0.07 (0.01, 0.13)  | 0.028  | 2660.95            | 2256.01            | -0.55          | 48.08          | 40.21          | -0.59             |        |
|                          | (203.15, 283.84) | (209.97, 293.80) |                      |        | (2785.90, 3603.62) | (2826.74, 3664.38) |                    |        | (2218.25, 3135.28) | (1651.89, 3033.51) | (-0.88, -0.21) | (39.61, 57.31) | (28.57, 55.08) | (-0.97, -0.22)    | 0.002  |
| Southern Latin America   | 127.20           | 109.93           | -0.51 (-0.53, -0.48) | <0.001 | 1835.01            | 1997.62            | 0.28 (0.23, 0.33)  | <0.001 | 1563.91            | 729.87             | -2.66          | 27.36          | 11.19          | -3.11             |        |
|                          | (108.28, 149.33) | (91.89, 130.51)  |                      |        | (1545.00, 2172.92) | (1685.01, 2362.07) |                    |        | (1453.36, 1685.95) | (640.36, 824.96)   | (-3.12, -2.20) | (25.38, 29.36) | (9.78, 12.66)  | (-3.63, -2.60)    | <0.001 |
| Oceania                  | 249.74           | 261.43           | 0.16 (0.12, 0.20)    | <0.001 | 2673.75            | 2744.07            | 0.09 (0.06, 0.13)  | <0.001 | 3370.87            | 3514.43            | 0.15           | 59.06          | 61.73          | 0.16 (0.04, 0.29) | 0.012  |
|                          | (219.02, 286.79) | (228.43, 299.73) |                      |        | (2382.34, 3020.14) | (2430.81, 3086.31) |                    |        | (2452.38, 4526.69) | (2470.68, 5009.28) | (0.04, 0.27)   | (41.63, 81.11) | (41.58, 91.26) |                   |        |
| Australasia              | 112.45           | 109.80           | -0.08 (-0.11, -0.06) | <0.001 | 1455.17            | 1485.18            | 0.07 (-0.01, 0.15) | 0.086  | 654.80             | 411.02             | -1.69          | 10.26          | 5.71           | -2.09             |        |
|                          | (92.16, 137.22)  | (90.38, 132.21)  |                      |        | (1201.00, 1782.91) | (1226.02, 1790.52) |                    |        | (593.73, 719.79)   | (354.87, 473.30)   | (-1.82, -1.57) | (9.36, 11.20)  | (4.87, 6.64)   | (-2.24, -1.94)    | <0.001 |
| <b>Men</b>               |                  |                  |                      |        |                    |                    |                    |        |                    |                    |                |                |                |                   |        |
| Global                   | 204.37           | 194.96           | -0.16 (-0.18, -0.15) | <0.001 | 2064.98            | 2138.71            | 0.13 (0.09, 0.18)  | <0.001 | 3061.04            | 2585.11            | -0.54          | 56.33          | 47.10          | -0.57             |        |
|                          | (172.80, 242.30) | (164.79, 230.15) |                      |        | (1863.10, 2307.38) | (1921.82, 2411.16) |                    |        | (2889.66, 3230.47) | (2377.12, 2813.68) | (-0.96, -0.12) | (53.20, 59.66) | (43.03, 51.23) | (-1.01, -0.13)    | 0.011  |
| <b>SDI category</b>      |                  |                  |                      |        |                    |                    |                    |        |                    |                    |                |                |                |                   |        |
| High                     | 236.34           | 214.12           | -0.34 (-0.35, -0.33) | <0.001 | 2016.07            | 2014.75            | 0.04 (-0.15, 0.23) | 0.702  | 1929.03            | 1236.97            | -1.47          | 34.99          | 21.60          | -1.59             |        |
|                          | (198.64, 284.46) | (184.12, 250.44) |                      |        | (1827.63, 2223.88) | (1847.38, 2195.02) |                    |        | (1872.02, 1991.73) | (1139.50, 1379.02) | (-1.62, -1.32) | (34.13, 35.94) | (19.93, 24.34) | (-1.85, -1.32)    | <0.001 |
| High-middle              | 206.05           | 185.11           | -0.37 (-0.41, -0.34) | <0.001 | 1813.18            | 1777.37            | -0.06              | 0.032  | 3495.52            | 2641.57            | -0.86          | 64.84          | 48.47          | -0.90             |        |
|                          | (175.64, 243.45) | (157.36, 219.85) |                      |        | (1641.02, 2008.44) | (1607.92, 1983.89) | (-0.11, -0.00)     |        | (3279.23, 3734.09) | (2409.28, 2882.06) | (-1.29, -0.43) | (60.82, 69.26) | (44.09, 53.06) | (-1.35, -0.44)    | <0.001 |

|                                 |          |          |               |        |           |           |              |        |           |           |         |        |         |         |         |        |
|---------------------------------|----------|----------|---------------|--------|-----------|-----------|--------------|--------|-----------|-----------|---------|--------|---------|---------|---------|--------|
|                                 | 193.92   | 191.60   |               |        | 2121.91   | 2158.37   |              |        | 3096.71   | 2655.36   | -0.49   |        | 56.68   | 48.19   | -0.57   |        |
| Middle                          | (162.26, | (160.81, | -0.04 (-0.06, | <0.001 | (1894.29, | (1926.39, | 0.06 (0.02,  | 0.003  | (2843.68, | (2400.38, | (-0.60, | <0.001 | (51.94, | (43.24, | (-0.62, | <0.001 |
|                                 | 232.86)  | 228.18)  | -0.03)        |        | 2410.65)  | 2450.80)  | 0.10)        |        | 3356.53)  | 2919.40)  | -0.38)  |        | 61.67)  | 53.20)  | -0.53)  |        |
|                                 | 189.21   | 192.94   |               |        | 2145.00   | 2259.59   |              |        | 3524.08   | 3235.95   | -0.18   |        | 65.33   | 59.64   | -0.20   |        |
| Low-middle                      | (158.39, | (161.21, | 0.06 (0.04,   | <0.001 | (1897.69, | (1995.91, | 0.19 (0.11,  | <0.001 | (3193.81, | (2846.46, | (-0.85, | 0.607  | (59.03, | (52.19, | (-0.91, | 0.589  |
|                                 | 225.30)  | 229.58)  | 0.08)         |        | 2451.04)  | 2585.02)  | 0.27)        |        | 3911.72)  | 3708.30)  | 0.50)   |        | 72.45)  | 68.73)  | 0.52)   |        |
|                                 | 205.16   | 203.16   |               |        | 2569.34   | 2668.10   |              |        | 3019.61   | 2656.02   | -0.39   |        | 55.25   | 48.13   | -0.42   |        |
| Low                             | (172.21, | (169.00, | -0.03 (-0.04, | <0.001 | (2231.02, | (2310.66, | 0.14 (0.00,  | 0.042  | (2624.29, | (2288.01, | (-0.63, | 0.002  | (47.81, | (41.07, | (-0.68, | 0.001  |
|                                 | 242.51)  | 240.94)  | -0.03)        |        | 2983.50)  | 3121.03)  | 0.26)        |        | 3410.89)  | 3070.18)  | -0.14)  |        | 62.88)  | 56.20)  | -0.16)  |        |
| <b>21 GBD region</b>            |          |          |               |        |           |           |              |        |           |           |         |        |         |         |         |        |
|                                 | 176.51   | 183.86   |               |        | 2007.94   | 2074.19   |              |        | 3697.20   | 3514.07   | -0.05   |        | 68.98   | 65.33   | -0.06   |        |
| South Asia                      | (145.72, | (152.28, | 0.13 (0.11,   | <0.001 | (1765.89, | (1817.29, | 0.13 (0.09,  | <0.001 | (3282.96, | (2997.18, | (-0.99, | 0.922  | (61.19, | (55.38, | (-1.04, | 0.911  |
|                                 | 211.98)  | 220.38)  | 0.15)         |        | 2314.39)  | 2381.01)  | 0.17)        |        | 4146.99)  | 4073.77)  | 0.90)   |        | 77.59)  | 76.01)  | 0.94)   |        |
|                                 | 175.16   | 164.55   |               |        | 1947.63   | 1867.07   |              |        | 2670.15   | 2266.58   | -0.44   |        | 48.44   | 40.72   | -0.47   |        |
| East Asia                       | (146.30, | (138.71, | -0.23 (-0.26, | <0.001 | (1720.54, | (1642.81, | (-0.17,      | <0.001 | (2242.98, | (1837.72, | (-0.90, | 0.065  | (40.24, | (32.41, | (-0.96, | 0.065  |
|                                 | 212.56)  | 197.42)  | -0.19)        |        | 2228.68)  | 2133.48)  | -0.12)       |        | 3096.46)  | 2703.40)  | 0.03)   |        | 56.73)  | 48.96)  | 0.03)   |        |
|                                 | 223.13   | 221.48   |               |        | 2564.77   | 2567.48   |              |        | 4159.43   | 2442.13   | -1.82   |        | 77.15   | 43.94   | -1.93   |        |
| North Africa and<br>Middle East | (183.90, | (182.41, | -0.02 (-0.04, | 0.186  | (2289.66, | (2298.53, | 0.02 (-0.07, | 0.636  | (3718.94, | (2033.71, | (-1.94, | <0.001 | (68.48, | (36.13, | (-2.05, | <0.001 |
|                                 | 270.70)  | 269.42)  | 0.01)         |        | 2941.73)  | 2937.82)  | 0.12)        |        | 4763.94)  | 3013.82)  | -1.70)  |        | 89.48)  | 54.94)  | -1.80)  |        |
|                                 | 193.60   | 197.00   |               |        | 2798.46   | 2920.56   |              |        | 1944.57   | 1791.26   | -0.28   |        | 34.19   | 31.10   | -0.33   |        |
| Western<br>Sub-Saharan Africa   | (161.22, | (163.73, | 0.06 (0.05,   | <0.001 | (2400.93, | (2492.19, | 0.16 (0.11,  | <0.001 | (1544.58, | (1434.34, | (-0.41, | <0.001 | (26.31, | (24.18, | (-0.47, | <0.001 |
|                                 | 229.71)  | 233.95)  | 0.07)         |        | 3370.93)  | 3522.83)  | 0.20)        |        | 2508.82)  | 2217.51)  | -0.15)  |        | 45.06)  | 39.20)  | -0.19)  |        |
|                                 | 222.62   | 212.99   |               |        | 1907.71   | 1899.07   |              |        | 3291.87   | 3112.50   | -0.14   |        | 59.75   | 56.36   | -0.15   |        |
| Southeast Asia                  | (188.32, | (181.62, | -0.15 (-0.16, | <0.001 | (1721.05, | (1714.56, | 0.01 (-0.09, | 0.908  | (2925.93, | (2622.52, | (-0.41, | 0.297  | (52.65, | (46.76, | (-0.44, | 0.321  |
|                                 | 265.43)  | 254.33)  | -0.15)        |        | 2115.69)  | 2105.84)  | 0.11)        |        | 3669.05)  | 3636.03)  | 0.12)   |        | 66.93)  | 66.40)  | 0.14)   |        |
|                                 | 221.22   | 203.46   |               |        | 3078.67   | 3151.96   |              |        | 2745.15   | 2102.35   | -0.94   |        | 49.33   | 36.91   | -1.01   |        |
| Eastern Sub-Saharan<br>Africa   | (184.12, | (166.75, | -0.28 (-0.30, | <0.001 | (2641.96, | (2689.30, | 0.09 (0.02,  | 0.008  | (2311.99, | (1764.05, | (-1.06, | <0.001 | (40.93, | (30.31, | (-1.13, | <0.001 |
|                                 | 261.68)  | 242.39)  | -0.26)        |        | 3649.29)  | 3760.03)  | 0.15)        |        | 3215.07)  | 2526.56)  | -0.81)  |        | 57.66)  | 45.09)  | -0.90)  |        |
|                                 | 150.32   | 143.29   |               |        | 1513.05   | 1565.55   |              |        | 1839.25   | 1467.04   | -0.64   |        | 33.94   | 26.72   | -0.67   |        |
| Central Latin<br>America        | (124.08, | (117.67, | -0.17 (-0.20, | <0.001 | (1349.17, | (1397.96, | 0.12 (0.06,  | <0.001 | (1762.55, | (1248.87, | (-1.00, | <0.001 | (32.52, | (22.55, | (-1.03, | <0.001 |
|                                 | 181.24)  | 174.37)  | -0.13)        |        | 1700.73)  | 1771.11)  | 0.17)        |        | 1921.97)  | 1708.18)  | -0.28)  |        | 35.48)  | 31.32)  | -0.31)  |        |
| Tropical Latin<br>America       | 229.10   | 163.95   |               |        | 2722.71   | 2480.70   |              |        | 4067.12   | 1867.29   | -2.62   |        | 75.72   | 33.51   | -2.74   |        |
|                                 | (192.21, | (136.89, | -1.16 (-1.21, | <0.001 | (2376.76, | (2166.07, | (-0.34,      | <0.001 | (3862.17, | (1746.12, | (-2.88, | <0.001 | (71.79, | (31.41, | (-3.02, | <0.001 |
|                                 | 192.21)  | 136.89)  | -1.12)        |        | 2376.76)  | 2166.07)  | (-0.34,      |        | 3862.17)  | 1746.12)  | (-2.88, |        | 71.79)  | 31.41)  | (-3.02, |        |

|                     |          |          |               |        |           |           |              |        |           |           |         |        |         |          |             |        |
|---------------------|----------|----------|---------------|--------|-----------|-----------|--------------|--------|-----------|-----------|---------|--------|---------|----------|-------------|--------|
|                     | 274.60)  | 195.04)  |               |        | 3143.94)  | 2888.48)  | -0.29)       |        | 4264.15)  | 1991.19)  | -2.36)  | 79.55) | 35.75)  | -2.46)   |             |        |
| Central Sub-Saharan | 222.57   | 204.72   |               |        | 3032.08   | 2946.34   | -0.10        |        | 2567.62   | 2066.25   | -0.77   | 46.18  | 36.63   | -0.82    |             |        |
| Africa              | (184.16, | (167.06, | -0.29 (-0.30, | <0.001 | (2562.82, | (2456.98, | (-0.12,      | <0.001 | (1892.47, | (1503.03, | (-0.90, | <0.001 | (33.59, | (25.88,  | (-0.97,     | <0.001 |
|                     | 264.80)  | 246.05)  | -0.28)        |        | 3649.81)  | 3587.26)  | -0.07)       |        | 3417.24)  | 2850.05)  | -0.64)  |        | 62.42)  | 51.68)   | -0.68)      |        |
| Western Europe      | 188.59   | 161.83   |               |        | 1325.73   | 1201.87   | -0.32        |        | 1748.34   | 758.76    | -2.86   | 32.19  | 13.29   | -3.03    |             |        |
|                     | (152.28, | (132.47, | -0.53 (-0.56, | <0.001 | (1176.26, | (1075.67, | (-0.42,      | <0.001 | (1689.73, | (718.63,  | (-3.07, | <0.001 | (31.16, | (12.65,  | (-3.26,     | <0.001 |
|                     | 232.35)  | 197.71)  | -0.50)        |        | 1494.14)  | 1333.01)  | -0.21)       |        | 1809.57)  | 800.14)   | -2.65)  |        | 33.28)  | 13.96)   | -2.80)      |        |
| High-income North   | 280.58   | 243.55   |               |        | 2691.68   | 2642.77   | -0.04        |        | 2048.02   | 1450.61   | -1.14   | 36.79  | 25.30   | -1.25    |             |        |
| America             | (233.06, | (212.28, | -0.48 (-0.54, | <0.001 | (2420.97, | (2407.86, | (-0.18,      | 0.572  | (1981.01, | (1341.13, | (-1.52, | <0.001 | (35.90, | (23.42,  | (-1.68,     | <0.001 |
|                     | 341.36)  | 279.86)  | -0.43)        |        | 3021.27)  | 2897.06)  | 0.10)        |        | 2117.65)  | 1532.04)  | -0.76)  |        | 37.81)  | 26.63)   | -0.82)      |        |
| Central Asia        | 277.61   | 263.57   |               |        | 2454.69   | 2506.73   |              |        | 4936.88   | 4309.75   | -0.66   | 92.11  | 80.01   | -0.68    |             |        |
|                     | (237.90, | (225.31, | -0.17 (-0.19, | <0.001 | (2201.25, | (2226.10, | 0.07 (0.05,  | <0.001 | (4729.35, | (3873.71, | (-1.28, | 0.038  | (88.09, | (71.52,  | (-1.32,     | 0.037  |
|                     | 326.52)  | 313.57)  | -0.16)        |        | 2750.98)  | 2832.65)  | 0.10)        |        | 5164.54)  | 4791.57)  | -0.04)  |        | 96.46)  | 89.16)   | -0.04)      |        |
| Eastern Europe      | 287.91   | 308.49   |               |        | 1755.44   | 1919.04   |              |        | 5490.27   | 6860.50   | 1.11    | 103.65 | 130.19  |          |             |        |
|                     | (244.83, | (264.55, | 0.24 (0.22,   | <0.001 | (1595.76, | (1750.27, | 0.30 (0.29,  | <0.001 | (5303.41, | (5963.55, | (0.02,  | 0.046  | (99.98, | (112.88, | 1.13 (0.01, | 0.047  |
|                     | 339.67)  | 362.55)  | 0.25)         |        | 1932.23)  | 2117.67)  | 0.32)        |        | 5629.25)  | 7811.09)  | 2.21)   |        | 106.20) | 148.55)  | 2.26)       |        |
| Southern            | 240.59   | 217.18   |               |        | 3027.78   | 3000.67   | -0.02        |        | 3305.95   | 2021.74   | -1.69   | 60.13  | 35.58   | -1.81    |             |        |
| Sub-Saharan Africa  | (198.44, | (177.17, | -0.35 (-0.37, | <0.001 | (2630.95, | (2593.56, | (-0.06,      | 0.297  | (2796.89, | (1562.75, | (-2.37, | <0.001 | (50.30, | (26.79,  | (-2.54,     | <0.001 |
|                     | 288.96)  | 262.51)  | -0.33)        |        | 3529.82)  | 3504.95)  | 0.02)        |        | 3808.15)  | 2565.38)  | -1.01)  |        | 69.75)  | 45.83)   | -1.07)      |        |
| High-income Asia    | 257.68   | 257.04   |               |        | 2085.11   | 2177.68   |              |        | 1712.14   | 808.39    | -2.58   | 30.86  | 13.39   | -2.88    |             |        |
| Pacific             | (227.51, | (226.82, | -0.01 (-0.03, | 0.536  | (1895.02, | (1987.52, | 0.16 (0.06,  | 0.002  | (1587.82, | (743.65,  | (-2.77, | <0.001 | (28.59, | (12.42,  | (-3.09,     | <0.001 |
|                     | 296.10)  | 293.42)  | 0.02)         |        | 2289.05)  | 2385.30)  | 0.27)        |        | 1817.79)  | 885.53)   | -2.40)  |        | 32.74)  | 14.66)   | -2.67)      |        |
| Central Europe      | 219.16   | 195.78   |               |        | 1790.98   | 1739.95   | -0.08        |        | 4453.16   | 1750.42   | -3.27   | 83.46  | 31.59   | -3.39    |             |        |
|                     | (187.63, | (168.27, | -0.40 (-0.42, | <0.001 | (1588.42, | (1557.88, | (-0.15,      | 0.018  | (4326.30, | (1546.06, | (-3.55, | <0.001 | (81.28, | (27.62,  | (-3.69,     | <0.001 |
|                     | 257.61)  | 228.69)  | -0.37)        |        | 2013.89)  | 1955.60)  | -0.01)       |        | 4589.56)  | 1966.53)  | -2.99)  |        | 85.95)  | 35.67)   | -3.10)      |        |
| Andean Latin        | 146.81   | 135.97   |               |        | 2222.13   | 2228.82   |              |        | 2092.04   | 1267.70   | -1.66   | 37.98  | 22.09   | -1.80    |             |        |
| America             | (122.96, | (113.25, | -0.27 (-0.30, | <0.001 | (1917.29, | (1919.12, | 0.01 (-0.01, | 0.539  | (1784.64, | (992.81,  | (-2.14, | <0.001 | (32.15, | (16.88,  | (-2.31,     | <0.001 |
|                     | 172.71)  | 161.58)  | -0.24)        |        | 2587.04)  | 2597.02)  | 0.03)        |        | 2455.03)  | 1641.72)  | -1.18)  |        | 45.10)  | 29.25)   | -1.28)      |        |
| Caribbean           | 259.38   | 268.77   |               |        | 2729.53   | 2792.47   |              |        | 2905.69   | 2501.39   | -0.48   | 53.65  | 45.85   | -0.51    |             |        |
|                     | (215.82, | (221.46, | 0.12 (0.11,   | <0.001 | (2419.50, | (2488.42, | 0.09 (0.04,  | <0.001 | (2580.66, | (1955.88, | (-0.76, | 0.001  | (47.39, | (35.34,  | (-0.80,     | 0.001  |
|                     | 313.82)  | 323.96)  | 0.14)         |        | 3109.00)  | 3177.87)  | 0.13)        |        | 3283.31)  | 3201.13)  | -0.21)  |        | 60.82)  | 59.49)   | -0.22)      |        |
| Southern Latin      | 165.26   | 151.33   |               |        | 1542.63   | 1649.99   | 0.24 (0.19,  | <0.001 | 2574.16   | 1299.04   | -2.28   | 47.76  | 23.06   | -2.43    |             |        |
| America             | (139.64, | (128.23, | -0.31 (-0.33, | <0.001 | (1335.03, | (1401.53, | 0.29)        | <0.001 | (2387.70, | (1146.56, | (-2.52, | <0.001 | (44.23, | (20.28,  | (-2.69,     | <0.001 |
|                     |          |          | -0.28)        |        |           |           |              |        |           |           |         |        |         |          |             |        |



|                                |             |             |               |        |               |               |              |        |               |               |         |        |          |         |         |        |
|--------------------------------|-------------|-------------|---------------|--------|---------------|---------------|--------------|--------|---------------|---------------|---------|--------|----------|---------|---------|--------|
|                                | 194.47)     | 179.73)     |               |        | 1799.47)      | 1945.95)      |              |        | 2768.30)      | 1434.09)      | -2.04)  | 51.27) | 25.76)   | -2.17)  |         |        |
|                                | 296.84      | 298.68      | 0.02 (0.01,   |        | 2556.08       | 2609.35       | 0.07 (0.05,  |        | 7241.79       | 7110.21       | -0.09   | 135.20 | 132.66   | -0.09   |         |        |
| Oceania                        | (258.00,    | (257.95,    | 0.02)         | <0.001 | (2257.87,     | (2309.76,     | 0.09)        | <0.001 | (5509.20,     | (5258.00,     | (-0.16, | 0.026  | (101.53, | (96.57, | (-0.17, | 0.025  |
|                                | 341.04)     | 344.71)     |               |        | 2877.26)      | 2956.89)      |              |        | 9186.72)      | 9471.64)      | -0.01)  |        | 172.77)  | 177.95) | -0.01)  |        |
|                                | 280.85      | 269.35      | -0.15 (-0.21, |        | 1705.02       | 1773.10       | 0.14 (-0.01, |        | 1514.88       | 833.59        | -2.03   |        | 27.63    | 14.67   | -2.14   |        |
| Australasia                    | (219.00,    | (214.44,    | -0.09)        | <0.001 | (1475.40,     | (1545.12,     | 0.29)        | 0.065  | (1411.60,     | (721.20,      | (-2.45, | <0.001 | (25.67,  | (12.55, | (-2.59, | <0.001 |
|                                | 361.99)     | 341.86)     |               |        | 1940.61)      | 2013.64)      |              |        | 1622.07)      | 951.20)       | -1.60)  |        | 29.53)   | 16.95)  | -1.69)  |        |
| <b>Rheumatic heart disease</b> |             |             |               |        |               |               |              |        |               |               |         |        |          |         |         |        |
| <b>15-19 years</b>             |             |             |               |        |               |               |              |        |               |               |         |        |          |         |         |        |
| <b>Women</b>                   |             |             |               |        |               |               |              |        |               |               |         |        |          |         |         |        |
|                                | 67.98       | 87.35       | 0.87 (0.79,   |        | 610.90        | 761.15        | 0.77 (0.72,  |        | 146.37        | 95.59 (75.07, | -1.52   |        | 1.64     | 0.83    | -2.35   |        |
| Global                         | (36.69,     | (47.03,     | 0.94)         | <0.001 | (392.36,      | (482.49,      | 0.82)        | <0.001 | (122.60,      | 123.70)       | (-1.60, | <0.001 | (1.38,   | (0.71,  | (-2.83, | <0.001 |
|                                | 101.12)     | 130.26)     |               |        | 905.00)       | 1143.20)      |              |        | 173.41)       |               | -1.45)  |        | 1.88)    | 0.97)   | -1.88)  |        |
| <b>SDI category</b>            |             |             |               |        |               |               |              |        |               |               |         |        |          |         |         |        |
|                                | 0.73 (0.38, | 0.85 (0.55, | 0.55 (0.47,   |        | 13.39 (10.00, | 14.15 (11.42, | 0.19 (0.04,  |        | 9.67 (8.19,   | 3.26 (2.74,   | -3.62   |        | 0.13     | 0.04    | -4.23   |        |
| High                           | 1.19)       | 1.21)       | 0.62)         | <0.001 | 17.63)        | 17.28)        | 0.33)        | 0.010  | 11.67)        | 3.91)         | (-3.83, | <0.001 | (0.11,   | (0.03,  | (-4.48, | <0.001 |
|                                |             |             |               |        |               |               |              |        |               |               | -3.41)  |        | 0.15)    | 0.04)   | -3.97)  |        |
|                                | 26.06       | 29.76       | 0.47 (0.43,   |        | 296.20        | 318.20        | 0.26 (0.18,  |        | 58.49 (48.52, | 28.08 (19.94, | -2.55   |        | 0.62     | 0.18    | -4.19   |        |
| High-middle                    | (12.93,     | (15.02,     | 0.51)         | <0.001 | (190.41,      | (204.19,      | 0.34)        | <0.001 | 70.58)        | 39.54)        | (-2.77, | <0.001 | (0.53,   | (0.14,  | (-4.58, | <0.001 |
|                                | 40.00)      | 45.95)      |               |        | 426.76)       | 468.29)       |              |        |               |               | -2.33)  |        | 0.73)    | 0.23)   | -3.81)  |        |
|                                | 64.65       | 66.38       | 0.10 (0.04,   |        | 670.99        | 649.68        | -0.09        |        | 130.08        | 69.18 (52.85, | -2.19   |        | 1.37     | 0.53    | -3.29   |        |
| Middle                         | (32.49,     | (34.40,     | 0.15)         | <0.001 | (428.18,      | (407.38,      | (-0.24,      | 0.204  | (108.32,      | 93.25)        | (-2.68, | <0.001 | (1.19,   | (0.44,  | (-3.83, | <0.001 |
|                                | 100.13)     | 101.64)     |               |        | 981.63)       | 952.79)       | 0.05)        |        | 155.67)       |               | -1.71)  |        | 1.56)    | 0.62)   | -2.74)  |        |
|                                | 111.16      | 119.80      | 0.27 (0.15,   |        | 828.84        | 932.28        | 0.42 (0.34,  |        | 272.70        | 152.31        | -2.04   |        | 3.26     | 1.51    | -2.70   |        |
| Low-middle                     | (65.97,     | (68.33,     | 0.39)         | <0.001 | (524.23,      | (576.12,      | 0.50)        | <0.001 | (221.97,      | (120.39,      | (-2.64, | <0.001 | (2.61,   | (1.22,  | (-3.39, | <0.001 |
|                                | 160.01)     | 176.03)     |               |        | 1243.56)      | 1423.34)      |              |        | 326.73)       | 191.82)       | -1.44)  |        | 3.96)    | 1.83)   | -2.00)  |        |
|                                | 140.63      | 149.32      | 0.22 (0.17,   |        | 1198.40       | 1310.34       | 0.31 (0.27,  |        | 247.36        | 140.96        | -1.94   |        | 2.67     | 1.10    | -3.06   |        |
| Low                            | (73.72,     | (76.04,     | 0.27)         | <0.001 | (777.18,      | (851.97,      | 0.35)        | <0.001 | (186.16,      | (103.72,      | (-2.14, | <0.001 | (1.97,   | (0.84,  | (-3.30, | <0.001 |
|                                | 210.52)     | 224.88)     |               |        | 1800.14)      | 1963.22)      |              |        | 315.90)       | 188.43)       | -1.74)  |        | 3.44)    | 1.41)   | -2.81)  |        |
| <b>21 GBD region</b>           |             |             |               |        |               |               |              |        |               |               |         |        |          |         |         |        |
|                                | 117.38      | 118.92      | 0.05 (-0.05,  |        | 725.90        | 791.22        | 0.33 (0.23,  |        | 357.46        | 182.99        | -2.39   |        | 4.52     | 2.03    | -2.83   |        |
| South Asia                     | (72.62,     | (71.78,     | 0.16)         | 0.329  | (456.77,      | (486.31,      | 0.44)        | <0.001 | (290.28,      | (148.97,      | (-3.25, | <0.001 | (3.58,   | (1.68,  | (-3.54, | <0.001 |

|                              |             |             |               |        |               |               |             |        |               |                |         |        |        |        |         |        |
|------------------------------|-------------|-------------|---------------|--------|---------------|---------------|-------------|--------|---------------|----------------|---------|--------|--------|--------|---------|--------|
|                              | 164.72)     | 170.64)     |               |        | 1114.13)      | 1252.74)      |             |        | 428.41)       | 221.98)        | -1.51)  | 5.47)  | 2.46)  | -2.11) |         |        |
|                              | 51.25       | 42.67       |               |        | 623.99        | 497.55        | -0.77       |        |               |                |         | 0.98   | 0.12   | -7.01  |         |        |
| East Asia                    | (23.39,     | (19.90,     | -0.62 (-0.76, | <0.001 | (398.74,      | (316.61,      | (-0.96,     | <0.001 | 99.99 (78.87, | 32.63 (21.02,  | (-4.29, | <0.001 | (0.79, | (0.09, | (-7.24, | <0.001 |
|                              | 82.56)      | 68.54)      | -0.47)        |        | 910.98)       | 731.35)       | -0.58)      |        | 125.94)       | 50.12)         | -3.42)  |        | 1.21)  | 0.15)  | -6.79)  |        |
|                              | 44.75       | 50.65       |               |        | 436.06        | 485.71        |             |        | 107.91        |                | -2.80   |        | 1.22   | 0.33   | -4.34   |        |
| North Africa and Middle East | (23.29,     | (26.14,     | 0.43 (0.40,   | <0.001 | (282.16,      | (299.73,      | 0.37 (0.32, | <0.001 | (73.14,       | 47.10 (31.50,  | (-2.90, | <0.001 | (0.76, | (0.22, | (-4.60, | <0.001 |
|                              | 67.92)      | 77.71)      | 0.46)         |        | 638.08)       | 726.81)       | 0.42)       |        | 141.97)       | 65.26)         | -2.70)  |        | 1.67)  | 0.49)  | -4.08)  |        |
|                              | 111.67      | 119.56      |               |        | 1097.12       | 1176.85       |             |        | 142.39        |                | -1.78   |        | 1.26   | 0.40   | -3.88   |        |
| Western Sub-Saharan Africa   | (54.50,     | (58.54,     | 0.24 (0.22,   | <0.001 | (687.40,      | (744.09,      | 0.24 (0.23, | <0.001 | (100.00,      | 84.84 (55.26,  | (-1.87, | <0.001 | (0.83, | (0.27, | (-4.00, | <0.001 |
|                              | 172.00)     | 184.47)     | 0.25)         |        | 1654.57)      | 1771.15)      | 0.26)       |        | 192.42)       | 128.71)        | -1.69)  |        | 1.72)  | 0.60)  | -3.75)  |        |
|                              | 35.09       | 36.69       |               |        | 342.65        | 380.87        |             |        |               |                | -1.17   |        | 1.02   | 0.63   | -1.61   |        |
| Southeast Asia               | (19.33,     | (18.70,     | 0.15 (0.11,   | <0.001 | (220.40,      | (239.52,      | 0.37 (0.33, | <0.001 | 89.42 (70.84, | 63.45 (51.02,  | (-1.34, | <0.001 | (0.79, | (0.51, | (-1.78, | <0.001 |
|                              | 53.28)      | 56.43)      | 0.19)         |        | 503.84)       | 560.11)       | 0.40)       |        | 109.19)       | 78.83)         | -1.00)  |        | 1.25)  | 0.74)  | -1.43)  |        |
|                              | 189.24      | 204.18      |               |        | 1704.41       | 1896.76       |             |        | 191.85        |                | -1.24   |        | 1.55   | 0.59   | -3.24   |        |
| Eastern Sub-Saharan Africa   | (93.08,     | (99.66,     | 0.27 (0.22,   | <0.001 | (1121.23,     | (1237.19,     | 0.37 (0.29, | <0.001 | (137.85,      | 132.97 (87.57, | (-1.39, | <0.001 | (1.10, | (0.44, | (-3.41, | <0.001 |
|                              | 284.34)     | 312.62)     | 0.31)         |        | 2542.57)      | 2807.80)      | 0.46)       |        | 261.74)       | 198.30)        | -1.09)  |        | 2.08)  | 0.81)  | -3.08)  |        |
|                              | 47.31       | 49.90       |               |        | 477.07        | 496.18        |             |        |               |                | -2.11   |        | 0.46   | 0.08   | -5.66   |        |
| Central Latin America        | (24.65,     | (26.05,     | 0.19 (0.14,   | <0.001 | (310.07,      | (321.14,      | 0.14 (0.10, | <0.001 | 55.82 (44.88, | 29.73 (18.48,  | (-2.23, | <0.001 | (0.42, | (0.07, | (-5.94, | <0.001 |
|                              | 71.22)      | 75.70)      | 0.23)         |        | 686.98)       | 725.85)       | 0.17)       |        | 71.81)        | 46.26)         | -1.99)  |        | 0.51)  | 0.10)  | -5.38)  |        |
|                              | 123.70      | 126.17      |               |        | 1285.61       | 1328.49       |             |        | 127.32        |                | -1.67   |        | 0.93   | 0.21   | -4.99   |        |
| Tropical Latin America       | (62.25,     | (63.04,     | 0.07 (0.05,   | <0.001 | (839.78,      | (865.73,      | 0.11 (0.08, | <0.001 | (98.48,       | 78.28 (48.38,  | (-1.83, | <0.001 | (0.85, | (0.19, | (-5.41, | <0.001 |
|                              | 189.33)     | 194.85)     | 0.08)         |        | 1854.15)      | 1896.22)      | 0.14)       |        | 171.36)       | 122.96)        | -1.51)  |        | 1.01)  | 0.23)  | -4.56)  |        |
|                              | 172.23      | 180.55      |               |        | 1778.50       | 1838.25       |             |        | 172.79        |                | -1.25   |        | 1.24   | 0.46   | -3.40   |        |
| Central Sub-Saharan Africa   | (83.67,     | (85.26,     | 0.16 (0.14,   | <0.001 | (1120.26,     | (1171.84,     | 0.11 (0.09, | <0.001 | (105.13,      | 120.34 (72.24, | (-1.41, | <0.001 | (0.59, | (0.24, | (-3.60, | <0.001 |
|                              | 280.90)     | 293.32)     | 0.19)         |        | 2685.70)      | 2726.72)      | 0.14)       |        | 253.39)       | 181.86)        | -1.09)  |        | 2.09)  | 0.85)  | -3.19)  |        |
|                              | 0.29 (0.10, | 0.21 (0.05, | -1.23 (-1.38, | <0.001 | 7.93 (5.86,   | 6.36 (4.58,   | -0.80       |        | 6.67 (6.02,   | 2.56 (2.19,    | -3.35   |        | 0.09   | 0.03   | -3.60   |        |
| Western Europe               | 0.56)       | 0.43)       | -1.09)        |        | 10.54)        | 8.51)         | (-0.91,     | <0.001 | 7.46)         | 2.96)          | (-3.94, | <0.001 | (0.08, | (0.03, | (-4.21, | <0.001 |
|                              |             |             |               |        |               |               | -0.68)      |        |               |                | -2.75)  |        | 0.10)  | 0.04)  | -3.00)  |        |
|                              |             |             |               |        |               |               | -0.93       |        |               |                | -3.11   |        | 0.08   | 0.03   | -3.72   |        |
| High-income North America    | 1.11 (0.46, | 0.85 (0.45, | -0.92 (-0.97, | <0.001 | 17.09 (11.71, | 13.00 (10.60, | (-0.97,     | <0.001 | 6.48 (5.81,   | 2.51 (2.16,    | (-3.79, | <0.001 | (0.07, | (0.02, | (-4.92, | <0.001 |
|                              | 1.95)       | 1.26)       | -0.88)        |        | 24.09)        | 15.85)        | -0.89)      |        | 7.21)         | 2.94)          | -2.43)  |        | 0.08)  | 0.03)  | -2.51)  |        |
|                              | 72.68       | 77.99       |               |        | 770.27        | 835.50        |             |        | 211.43        |                | -2.33   |        | 2.45   | 0.88   | -3.28   |        |
| Central Asia                 | (37.13,     | (39.30,     | 0.26 (0.24,   | <0.001 | (493.16,      | (530.38,      | 0.28 (0.26, | <0.001 | (187.85,      | 102.98 (79.79, | (-2.60, | <0.001 | (2.23, | (0.70, | (-3.67, | <0.001 |
|                              | 37.13,      | 39.30,      | 0.27)         |        | 493.16,       | 530.38,       | 0.30)       |        | 187.85,       | 135.94)        | (-2.60, |        | 2.23,  | 0.70,  | (-3.67, |        |

|                             | 113.25)     | 121.77)     |               |        | 1131.42)      | 1228.62)      |             |        | 239.62)       | -2.06)         | 2.69)   | 1.09)  | -2.89) |             |         |        |
|-----------------------------|-------------|-------------|---------------|--------|---------------|---------------|-------------|--------|---------------|----------------|---------|--------|--------|-------------|---------|--------|
| Eastern Europe              | 1.74 (1.04, | 1.68 (1.01, | -0.13 (-0.19, | <0.001 | 24.56 (18.78, | 23.75 (18.17, | -0.12       |        | 25.42 (23.16, | 6.92 (5.77,    | -4.36   | 0.34   | 0.08   | -4.81       |         |        |
|                             | 2.52)       | 2.45)       | -0.07)        |        | 31.37)        | 30.31)        | (-0.15,     | <0.001 | 27.46)        | 8.19)          | (-5.99, | <0.001 | (0.31, | (0.07,      | (-6.53, | <0.001 |
|                             |             |             |               |        |               |               | -0.08)      |        |               |                | -2.70)  |        | 0.36)  | 0.10)       | -3.06)  |        |
| Southern Sub-Saharan Africa | 164.83      | 167.26      | 0.05 (0.01,   | 0.015  | 1647.98       | 1671.64       | 0.06 (0.01, |        | 200.60        | 156.86         | -0.89   | 1.71   | 1.08   | -1.39       |         |        |
|                             | (77.33,     | (81.25,     | 0.08)         |        | (1051.58,     | (1067.41,     | 0.11)       | 0.015  | (147.11,      | (103.38,       | (-1.30, | <0.001 | (1.24, | (0.64,      | (-2.37, | 0.005  |
|                             | 256.77)     | 259.21)     |               |        | 2454.18)      | 2480.96)      |             |        | 266.11)       | 226.73)        | -0.47)  |        | 2.17)  | 1.67)       | -0.41)  |        |
| High-income Asia Pacific    | 0.35 (0.13, | 0.19 (0.05, | -2.09 (-2.15, | <0.001 | 10.04 (7.38,  | 7.75 (5.94,   | -0.90       |        | 7.90 (6.29,   | 2.06 (1.66,    | -4.54   | 0.10   | 0.02   | -5.14       |         |        |
|                             | 0.66)       | 0.38)       | -2.03)        |        | 13.33)        | 9.97)         | (-0.93,     | <0.001 | 9.86)         | 2.52)          | (-5.45, | <0.001 | (0.08, | (0.02,      | (-6.23, | <0.001 |
|                             |             |             |               |        |               |               | -0.87)      |        |               |                | -3.64)  |        | 0.13)  | 0.03)       | -4.05)  |        |
| Central Europe              | 3.33 (1.89, | 2.97 (1.62, | -0.39 (-0.58, | <0.001 | 39.40 (27.29, | 37.10 (25.83, | -0.18       |        | 19.89 (17.87, | 5.10 (4.08,    | -4.60   | 0.25   | 0.05   | -5.68       |         |        |
|                             | 4.90)       | 4.50)       | -0.20)        |        | 54.95)        | 51.25)        | (-0.36,     | 0.048  | 22.22)        | 6.51)          | (-5.17, | <0.001 | (0.23, | (0.04,      | (-6.46, | <0.001 |
|                             |             |             |               |        |               |               | -0.00)      |        |               |                | -4.03)  |        | 0.28)  | 0.06)       | -4.90)  |        |
| Andean Latin America        | 103.86      | 105.86      | 0.06 (0.04,   | <0.001 | 1073.13       | 1101.14       | 0.09 (0.08, |        | 101.83        | 66.42 (40.51,  | -1.48   | 0.71   | 0.19   | -4.54       |         |        |
|                             | (52.23,     | (52.50,     | 0.08)         |        | (688.20,      | (702.64,      | 0.10)       | <0.001 | (71.82,       | 106.35)        | (-1.69, | <0.001 | (0.50, | (0.13,      | (-5.20, | <0.001 |
|                             | 159.04)     | 165.26)     |               |        | 1571.99)      | 1633.72)      |             |        | 141.86)       |                | -1.27)  |        | 1.00)  | 0.28)       | -3.88)  |        |
| Caribbean                   | 100.25      | 109.61      | 0.31 (0.27,   | <0.001 | 1027.68       | 1094.35       | 0.21 (0.20, |        | 226.87        | 155.99 (94.59, | -1.11   | 2.49   | 1.45   | -1.62       |         |        |
|                             | (51.92,     | (53.71,     | 0.35)         |        | (668.98,      | (703.12,      | 0.23)       | <0.001 | (160.89,      | 249.42)        | (-1.36, | <0.001 | (1.67, | (0.73,      | (-1.98, | <0.001 |
|                             | 152.58)     | 167.69)     |               |        | 1485.66)      | 1620.25)      |             |        | 309.13)       |                | -0.86)  |        | 3.58)  | 2.64)       | -1.26)  |        |
| Southern Latin America      | 48.41       | 53.17       | 0.34 (0.28,   | <0.001 | 575.11        | 632.95        | 0.33 (0.27, |        | 51.94 (37.53, | 36.95 (22.12,  | -1.16   | 0.34   | 0.09   | -4.36       |         |        |
|                             | (24.06,     | (26.21,     | 0.40)         |        | (367.79,      | (406.53,      | 0.38)       | <0.001 | 72.71)        | 58.56)         | (-1.33, | <0.001 | (0.28, | (0.07,      | (-4.78, | <0.001 |
|                             | 75.24)      | 83.91)      |               |        | 841.61)       | 909.99)       |             |        |               |                | -0.98)  |        | 0.41)  | 0.11)       | -3.93)  |        |
| Oceania                     | 46.91       | 50.45       | 0.26 (0.23,   | <0.001 | 770.04        | 841.46        | 0.31 (0.24, |        | 424.10        | 426.40         | 0.17    | 5.42   | 5.40   | 0.15 (0.03, | 0.014   |        |
|                             | (21.27,     | (21.86,     | 0.29)         |        | (510.85,      | (565.52,      | 0.39)       | <0.001 | (259.64,      | (272.75,       | (0.06,  | 0.003  | (3.10, | (3.22,      | 0.28)   |        |
|                             | 81.06)      | 88.96)      |               |        | 1140.57)      | 1226.28)      |             |        | 652.56)       | 654.84)        | 0.29)   |        | 8.65)  | 8.64)       |         |        |
| Australasia                 | 0.92 (0.31, | 0.78 (0.23, | -0.52 (-0.64, | <0.001 | 23.43 (15.13, | 22.91 (15.05, | -0.06       |        | 13.58 (11.27, | 5.29 (3.93,    | -3.16   | 0.17   | 0.06   | -3.56       |         |        |
|                             | 1.76)       | 1.58)       | -0.40)        |        | 33.44)        | 32.67)        | (-0.12,     | 0.082  | 16.29)        | 6.98)          | (-4.70, | <0.001 | (0.14, | (0.05,      | (-5.47, | <0.001 |
|                             |             |             |               |        |               |               | 0.01)       |        |               |                | -1.60)  |        | 0.21)  | 0.07)       | -1.62)  |        |
| <b>Men</b>                  |             |             |               |        |               |               |             |        |               |                |         |        |        |             |         |        |
| Global                      | 54.81       | 69.11       | 0.82 (0.69,   | <0.001 | 523.41        | 639.62        | 0.71 (0.65, |        | 135.24        | 96.50 (77.55,  | -1.23   | 1.54   | 0.92   | -1.85       |         |        |
|                             | (28.30,     | (35.55,     | 0.94)         |        | (334.77,      | (407.29,      | 0.76)       | <0.001 | (112.90,      | 121.15)        | (-2.03, | 0.003  | (1.29, | (0.77,      | (-2.99, | 0.002  |
|                             | 83.84)      | 105.10)     |               |        | 777.60)       | 963.19)       |             |        | 160.39)       |                | -0.42)  |        | 1.82)  | 1.09)       | -0.70)  |        |
| <b>SDI category</b>         |             |             |               |        |               |               |             |        |               |                |         |        |        |             |         |        |

|                            |                        |                        |                      |        |                           |                            |                      |        |                         |                         |                      |        |                   |                   |                      |        |
|----------------------------|------------------------|------------------------|----------------------|--------|---------------------------|----------------------------|----------------------|--------|-------------------------|-------------------------|----------------------|--------|-------------------|-------------------|----------------------|--------|
| High                       | 0.56 (0.30, 0.95)      | 0.64 (0.41, 0.92)      | 0.50 (0.06, 0.95)    | 0.027  | 12.23 (9.28, 15.92)       | 12.60 (10.12, 15.44)       | 0.08 (-0.00, 0.17)   | 0.055  | 8.61 (7.37, 10.22)      | 2.86 (2.43, 3.37)       | -3.72 (-3.92, -3.52) | <0.001 | 0.11 (0.10, 0.13) | 0.03 (0.03, 0.04) | -4.30 (-4.52, -4.08) | <0.001 |
|                            | 23.27 (11.50, 36.21)   | 25.18 (13.00, 39.08)   | 0.29 (0.23, 0.34)    | <0.001 | 259.33 (164.99, 380.21)   | 264.07 (167.93, 389.64)    | 0.10 (0.02, 0.18)    | 0.014  | 61.32 (50.67, 72.86)    | 29.02 (21.14, 38.79)    | -2.64 (-2.83, -2.44) | <0.001 | 0.68 (0.58, 0.80) | 0.23 (0.17, 0.30) | -3.71 (-4.77, -2.63) | <0.001 |
|                            | 56.45 (27.04, 88.38)   | 56.52 (28.58, 86.95)   | 0.03 (-0.04, 0.11)   | 0.398  | 595.75 (380.21, 881.64)   | 559.22 (349.50, 836.81)    | -0.20 (-0.29, -0.12) | <0.001 | 116.93 (95.77, 142.31)  | 66.79 (51.40, 87.59)    | -2.04 (-2.54, -1.55) | <0.001 | 1.23 (1.04, 1.50) | 0.56 (0.46, 0.67) | -2.78 (-3.52, -2.03) | <0.001 |
| Middle                     | 80.26 (44.11, 119.35)  | 87.99 (47.99, 132.95)  | 0.35 (0.16, 0.55)    | <0.001 | 666.95 (420.19, 1007.14)  | 747.13 (465.08, 1129.42)   | 0.41 (0.35, 0.46)    | <0.001 | 237.12 (193.11, 289.33) | 143.60 (113.56, 182.34) | -1.88 (-3.17, -0.58) | 0.005  | 2.87 (2.31, 3.57) | 1.51 (1.17, 1.93) | -2.33 (-3.67, -0.97) | 0.001  |
|                            | 117.01 (60.46, 175.34) | 124.49 (61.01, 189.93) | 0.23 (0.20, 0.26)    | <0.001 | 1058.95 (685.09, 1591.19) | 1166.88 (754.79, 1754.59)  | 0.34 (0.26, 0.42)    | <0.001 | 264.53 (204.35, 338.07) | 166.30 (127.64, 213.22) | -1.64 (-2.31, -0.96) | <0.001 | 2.99 (2.22, 3.84) | 1.54 (1.18, 1.95) | -2.35 (-3.17, -1.52) | <0.001 |
|                            | <b>21 GBD region</b>   |                        |                      |        |                           |                            |                      |        |                         |                         |                      |        |                   |                   |                      |        |
| South Asia                 | 79.43 (46.47, 116.26)  | 83.02 (48.04, 123.07)  | 0.21 (-0.07, 0.50)   | 0.144  | 562.95 (352.25, 854.65)   | 609.40 (378.35, 936.78)    | 0.32 (0.16, 0.47)    | <0.001 | 312.74 (254.07, 379.08) | 178.91 (141.41, 219.71) | -2.06 (-3.88, -0.21) | 0.029  | 4.00 (3.23, 4.88) | 2.09 (1.64, 2.59) | -2.23 (-3.40, -1.04) | <0.001 |
|                            | 48.35 (21.42, 77.92)   | 39.84 (18.76, 64.07)   | -0.65 (-0.79, -0.51) | <0.001 | 580.82 (366.56, 859.29)   | 451.29 (281.54, 674.45)    | -0.88 (-0.96, -0.80) | <0.001 | 95.32 (72.56, 122.98)   | 32.91 (21.62, 49.25)    | -3.63 (-3.79, -3.46) | <0.001 | 0.94 (0.71, 1.22) | 0.15 (0.11, 0.20) | -6.15 (-6.47, -5.82) | <0.001 |
|                            | 42.21 (21.94, 63.73)   | 47.76 (24.78, 73.28)   | 0.43 (0.41, 0.44)    | <0.001 | 404.60 (261.64, 598.82)   | 447.04 (275.95, 680.66)    | 0.35 (0.29, 0.41)    | <0.001 | 75.98 (49.64, 126.82)   | 41.84 (26.46, 64.13)    | -2.02 (-2.17, -1.88) | <0.001 | 0.79 (0.46, 1.46) | 0.28 (0.16, 0.50) | -3.41 (-3.67, -3.15) | <0.001 |
| Western Sub-Saharan Africa | 104.80 (50.96, 162.11) | 108.87 (52.47, 169.45) | 0.13 (0.11, 0.15)    | <0.001 | 1070.71 (671.93, 1621.68) | 1123.89 (702.22, 1698.40)  | 0.17 (0.14, 0.20)    | <0.001 | 125.51 (85.42, 176.69)  | 84.59 (54.05, 129.26)   | -1.35 (-1.43, -1.26) | <0.001 | 1.04 (0.64, 1.56) | 0.43 (0.28, 0.66) | -3.00 (-3.17, -2.83) | <0.001 |
|                            | 24.35 (12.29, 37.70)   | 26.12 (12.90, 40.66)   | 0.24 (0.19, 0.29)    | <0.001 | 248.92 (158.14, 370.24)   | 279.63 (175.87, 414.66)    | 0.40 (0.37, 0.43)    | <0.001 | 67.77 (52.01, 89.22)    | 54.23 (40.66, 68.01)    | -0.73 (-0.90, -0.57) | <0.001 | 0.78 (0.58, 1.06) | 0.57 (0.41, 0.73) | -1.05 (-1.26, -0.85) | <0.001 |
|                            | 162.22 (77.24, 244.20) | 173.06 (82.52, 263.60) | 0.24 (0.18, 0.29)    | <0.001 | 1503.70 (985.95, 2021.45) | 1685.02 (1089.66, 2280.38) | 0.41 (0.33, 0.49)    | <0.001 | 265.26 (197.48, 333.04) | 169.76 (121.72, 217.70) | -1.52 (-1.63, -1.41) | <0.001 | 2.71 (1.93, 3.49) | 1.24 (0.94, 1.54) | -2.63 (-2.78, -2.48) | <0.001 |

|                             |                           |                           |                      |        |                               |                               |                         |        |                            |                            |                         |        |                      |                      |                         |        |
|-----------------------------|---------------------------|---------------------------|----------------------|--------|-------------------------------|-------------------------------|-------------------------|--------|----------------------------|----------------------------|-------------------------|--------|----------------------|----------------------|-------------------------|--------|
|                             | 246.30)                   | 266.35)                   |                      |        | 2265.10)                      | 2500.37)                      |                         |        | 354.96)                    | 231.61)                    | -1.41)                  | 3.75)  | 1.64)                | -2.48)               |                         |        |
| Central Latin America       | 38.55<br>(19.43, 58.43)   | 40.37<br>(20.60, 61.97)   | 0.16 (0.14, 0.19)    | <0.001 | 384.90<br>(247.28, 571.85)    | 403.27<br>(255.00, 605.46)    | 0.16 (0.14, 0.19)       | <0.001 | 48.70 (39.45, 62.79)       | 26.02 (16.78, 40.85)       | -2.11<br>(-2.27, -1.96) | <0.001 | 0.42<br>(0.38, 0.47) | 0.09<br>(0.11, 0.11) | -4.97<br>(-5.28, -4.66) | <0.001 |
| Tropical Latin America      | 106.64<br>(53.04, 164.09) | 104.92<br>(52.08, 160.53) | -0.06 (-0.07, -0.05) | <0.001 | 1059.70<br>(668.81, 1576.15)  | 1054.91<br>(673.14, 1556.94)  | -0.02<br>(-0.06, 0.02)  | 0.318  | 134.29<br>(108.64, 173.83) | 71.25 (46.63, 108.73)      | -2.13<br>(-2.27, -2.00) | <0.001 | 1.17<br>(1.06, 1.31) | 0.29<br>(0.24, 0.32) | -4.74<br>(-5.14, -4.34) | <0.001 |
| Central Sub-Saharan Africa  | 156.45<br>(71.38, 246.88) | 158.90<br>(74.74, 262.80) | 0.06 (0.04, 0.08)    | <0.001 | 1786.25<br>(1099.04, 2608.90) | 1798.49<br>(1124.73, 2660.26) | 0.02 (0.01, 0.03)       | 0.001  | 233.48<br>(149.22, 331.07) | 164.53<br>(101.16, 266.98) | -1.23<br>(-1.31, -1.16) | <0.001 | 2.08<br>(1.12, 3.40) | 1.10<br>(0.53, 2.37) | -2.20<br>(-2.33, -2.07) | <0.001 |
| Western Europe              | 0.30 (0.12, 0.57)         | 0.21 (0.06, 0.44)         | -1.28 (-1.54, -1.02) | <0.001 | 7.15 (5.18, 9.70)             | 5.65 (4.00, 7.77)             | -0.85<br>(-0.95, -0.74) | <0.001 | 7.93 (7.11, 8.76)          | 2.43 (1.96, 2.80)          | -4.15<br>(-4.83, -3.46) | <0.001 | 0.11<br>(0.09, 0.12) | 0.03<br>(0.02, 0.03) | -4.39<br>(-5.13, -3.65) | <0.001 |
| High-income North America   | 0.70 (0.24, 1.32)         | 0.41 (0.19, 0.68)         | -1.76 (-1.82, -1.70) | <0.001 | 15.47 (11.08, 21.31)          | 11.50 (9.64, 13.66)           | -0.99<br>(-1.08, -0.90) | <0.001 | 6.26 (5.56, 7.03)          | 2.40 (2.06, 2.84)          | -3.10<br>(-3.64, -2.55) | <0.001 | 0.08<br>(0.07, 0.08) | 0.02<br>(0.02, 0.03) | -3.63<br>(-4.24, -3.02) | <0.001 |
| Central Asia                | 67.10<br>(34.32, 103.27)  | 73.48<br>(38.04, 115.08)  | 0.32 (0.30, 0.34)    | <0.001 | 674.23<br>(426.18, 1000.83)   | 735.70<br>(457.47, 1093.16)   | 0.30 (0.29, 0.32)       | <0.001 | 181.35<br>(159.50, 209.16) | 99.57 (76.36, 132.14)      | -2.00<br>(-2.37, -1.64) | <0.001 | 2.08<br>(1.89, 2.28) | 0.90<br>(0.72, 1.13) | -2.81<br>(-3.37, -2.25) | <0.001 |
| Eastern Europe              | 2.00 (1.22, 2.87)         | 1.65 (1.01, 2.39)         | -0.61 (-0.71, -0.52) | <0.001 | 25.24 (19.28, 32.22)          | 22.01 (16.73, 28.12)          | -0.46<br>(-0.52, -0.41) | <0.001 | 35.43 (30.37, 38.86)       | 8.45 (6.70, 10.30)         | -4.51<br>(-5.31, -3.70) | <0.001 | 0.48<br>(0.41, 0.53) | 0.10<br>(0.08, 0.13) | -4.82<br>(-5.66, -3.97) | <0.001 |
| Southern Sub-Saharan Africa | 142.16<br>(68.14, 221.64) | 145.75<br>(70.24, 224.93) | 0.08 (0.07, 0.09)    | <0.001 | 1455.89<br>(923.69, 2189.66)  | 1498.61<br>(952.09, 2239.47)  | 0.10 (0.09, 0.11)       | <0.001 | 210.70<br>(150.17, 285.34) | 207.85<br>(137.38, 299.49) | -0.00<br>(-0.36, 0.36)  | 0.987  | 1.97<br>(1.35, 2.78) | 1.90<br>(1.10, 3.03) | -0.06<br>(-0.56, 0.44)  | 0.805  |
| High-income Asia Pacific    | 0.36 (0.14, 0.68)         | 0.20 (0.05, 0.40)         | -2.13 (-2.26, -2.00) | <0.001 | 10.83 (7.99, 14.26)           | 8.51 (6.45, 10.93)            | -0.84<br>(-0.92, -0.77) | <0.001 | 7.53 (5.58, 9.21)          | 1.96 (1.62, 2.29)          | -4.58<br>(-4.78, -4.37) | <0.001 | 0.10<br>(0.07, 0.12) | 0.02<br>(0.02, 0.02) | -5.15<br>(-5.51, -4.78) | <0.001 |
| Central Europe              | 3.44 (2.07, 5.10)         | 3.13 (1.71, 4.84)         | -0.28 (-0.49, -0.07) | 0.009  | 37.87 (25.88, 53.83)          | 35.02 (23.90, 50.39)          | -0.21<br>(-0.42, -0.00) | 0.047  | 30.18 (27.03, 33.35)       | 6.75 (5.45, 8.28)          | -4.95<br>(-5.72, -4.17) | <0.001 | 0.40<br>(0.36, 0.44) | 0.07<br>(0.06, 0.09) | -5.71<br>(-6.40, -5.02) | <0.001 |
| Andean Latin America        | 91.03<br>(47.21, 134.85)  | 89.56<br>(44.88, 134.24)  | -0.06 (-0.08, -0.04) | <0.001 | 923.49<br>(582.32, 1264.66)   | 923.99<br>(576.28, 1271.70)   | -0.01<br>(-0.06, 0.04)  | 0.791  | 88.34 (61.18, 124.76)      | 59.66 (37.56, 93.38)       | -1.36<br>(-1.48, -1.24) | <0.001 | 0.61<br>(0.43, 0.79) | 0.21<br>(0.14, 0.28) | -3.64<br>(-3.87, -3.41) | <0.001 |

|                     |             |             |               |        |               |               |              |        |               |                |         |        |        |        |         |        |
|---------------------|-------------|-------------|---------------|--------|---------------|---------------|--------------|--------|---------------|----------------|---------|--------|--------|--------|---------|--------|
|                     | 141.89)     | 139.79)     |               |        | 1380.31)      | 1361.45)      | 0.04)        |        |               |                | -1.25)  | 0.86)  | 0.30)  | -3.41) |         |        |
|                     | 85.31       | 91.61       |               |        | 878.32        | 912.39        |              |        | 140.61        | 96.38 (62.68,  | -1.21   | 1.38   | 0.73   | -1.99  |         |        |
| Caribbean           | (42.53,     | (46.56,     | 0.24 (0.22,   | <0.001 | (546.99,      | (574.18,      | 0.13 (0.11,  | <0.001 | (107.34,      | 147.68)        | (-1.48, | <0.001 | (1.03, | (0.39, | (-2.41, | <0.001 |
|                     | 132.32)     | 143.05)     | 0.26)         |        | 1315.64)      | 1365.91)      | 0.15)        |        | 186.28)       |                | -0.94)  | 1.91)  | 1.33)  | -1.56) |         |        |
| Southern Latin      | 48.69       | 53.06       |               |        | 518.50        | 567.74        |              |        | 50.72 (37.68, | 33.98 (20.22,  | -1.38   | 0.36   | 0.09   | -4.66  |         |        |
| America             | (24.53,     | (26.21,     | 0.29 (0.21,   | <0.001 | (328.75,      | (359.30,      | 0.31 (0.25,  | <0.001 | 70.32)        | 54.42)         | (-1.53, | <0.001 | (0.31, | (0.07, | (-5.17, | <0.001 |
|                     | 75.17)      | 82.14)      | 0.38)         |        | 757.34)       | 854.47)       | 0.38)        |        |               |                | -1.23)  | 0.43)  | 0.11)  | -4.14) |         |        |
| Oceania             | 39.18       | 41.88       |               |        | 647.07        | 710.07        |              |        | 504.46        | 506.45         | -0.02   | 6.63   | 6.62   | -0.04  |         |        |
|                     | (17.45,     | (18.67,     | 0.23 (0.22,   | <0.001 | (423.64,      | (460.98,      | 0.32 (0.29,  | <0.001 | (309.08,      | (289.70,       | (-0.20, | 0.798  | (3.91, | (3.60, | (-0.23, | 0.640  |
|                     | 69.95)      | 75.93)      | 0.25)         |        | 931.55)       | 1035.63)      | 0.34)        |        | 825.82)       | 821.74)        | 0.15)   | 11.14) | 11.30) | 0.14)  |         |        |
| Australasia         | 0.54 (0.16, | 0.42 (0.09, | -0.80 (-0.98, | <0.001 | 18.50 (12.51, | 17.32 (11.89, | -0.21        |        | 19.16 (15.84, | 6.29 (4.93,    | -3.62   | 0.26   | 0.08   | -3.95  |         |        |
|                     | 1.13)       | 0.91)       | -0.62)        |        | 26.10)        | 24.77)        | (-0.26,      | <0.001 | 23.43)        | 7.98)          | (-4.73, | <0.001 | (0.21, | (0.06, | (-5.10, | <0.001 |
|                     |             |             |               |        |               |               | -0.17)       |        |               |                | -2.50)  | 0.31)  | 0.10)  | -2.79) |         |        |
| <b>20-24 years</b>  |             |             |               |        |               |               |              |        |               |                |         |        |        |        |         |        |
| <b>Women</b>        |             |             |               |        |               |               |              |        |               |                |         |        |        |        |         |        |
| Global              | 56.18       | 70.06       |               |        | 726.10        | 902.05        |              |        | 181.28        | 113.27 (91.85, | -1.61   | 2.20   | 1.05   | -2.53  |         |        |
|                     | (30.36,     | (37.80,     | 0.76 (0.67,   | <0.001 | (524.75,      | (645.91,      | 0.76 (0.71,  | <0.001 | (150.24,      | 141.89)        | (-1.86, | <0.001 | (1.82, | (0.90, | (-2.87, | <0.001 |
|                     | 84.80)      | 106.32)     | 0.85)         |        | 967.23)       | 1212.37)      | 0.81)        |        | 213.94)       |                | -1.36)  | 2.63)  | 1.26)  | -2.20) |         |        |
| <b>SDI category</b> |             |             |               |        |               |               |              |        |               |                |         |        |        |        |         |        |
| High                | 0.89 (0.44, | 0.91 (0.58, | 0.03 (-0.18,  | 0.777  | 16.50 (12.58, | 16.93 (14.02, | 0.13 (-0.24, | 0.484  | 12.19 (10.60, | 4.60 (3.88,    | -3.28   | 0.17   | 0.06   | -3.81  |         |        |
|                     | 1.55)       | 1.34)       | 0.24)         |        | 21.37)        | 20.15)        | 0.51)        |        | 14.16)        | 5.60)          | (-3.48, | <0.001 | (0.15, | (0.05, | (-4.12, | <0.001 |
|                     |             |             |               |        |               |               |              |        |               |                | -3.08)  |        | 0.20)  | 0.07)  | -3.49)  |        |
| High-middle         | 20.59       | 23.54       |               |        | 340.27        | 371.41        |              |        | 74.09 (61.96, | 31.23 (22.76,  | -2.95   | 0.87   | 0.20   | -4.90  |         |        |
|                     | (10.81,     | (12.64,     | 0.47 (0.41,   | <0.001 | (245.76,      | (263.61,      | 0.32 (0.24,  | <0.001 | 88.89)        | 42.91)         | (-3.23, | <0.001 | (0.73, | (0.16, | (-5.35, | <0.001 |
|                     | 32.66)      | 36.88)      | 0.52)         |        | 455.12)       | 502.04)       | 0.40)        |        |               |                | -2.68)  |        | 1.03)  | 0.26)  | -4.44)  |        |
| Middle              | 51.87       | 55.23       |               |        | 784.98        | 791.54        |              |        | 170.77        | 80.39 (61.72,  | -2.58   | 2.00   | 0.64   | -3.92  |         |        |
|                     | (26.70,     | (29.37,     | 0.23 (0.07,   | 0.004  | (556.77,      | (560.01,      | 0.04 (-0.01, | 0.125  | (142.58,      | 103.48)        | (-2.96, | <0.001 | (1.69, | (0.50, | (-4.44, | <0.001 |
|                     | 80.81)      | 84.64)      | 0.40)         |        | 1059.61)      | 1070.47)      | 0.09)        |        | 202.82)       |                | -2.19)  |        | 2.34)  | 0.80)  | -3.38)  |        |
| Low-middle          | 107.79      | 108.89      |               |        | 1122.08       | 1216.22       |              |        | 340.82        | 188.59         | -2.09   | 4.32   | 1.96   | -2.74  |         |        |
|                     | (60.90,     | (61.24,     | 0.04 (-0.03,  | 0.297  | (810.47,      | (865.78,      | 0.29 (0.24,  | <0.001 | (266.25,      | (150.04,       | (-2.62, | <0.001 | (3.22, | (1.56, | (-3.34, | <0.001 |
|                     | 157.78)     | 160.46)     | 0.11)         |        | 1483.03)      | 1629.87)      | 0.34)        |        | 422.18)       | 234.34)        | -1.54)  |        | 5.47)  | 2.43)  | -2.13)  |        |
| Low                 | 111.74      | 113.65      |               |        | 1445.74       | 1551.46       |              |        | 332.84        | 183.25         | -2.03   | 3.97   | 1.65   | -2.99  |         |        |
|                     | (59.04,     | (58.82,     | 0.06 (0.04,   | <0.001 | (1031.26,     | (1105.49,     | 0.26 (0.20,  | <0.001 | (248.28,      | (138.91,       | (-2.31, | <0.001 | (2.84, | (1.22, | (-3.31, | <0.001 |
|                     |             |             | 0.09)         |        |               |               | 0.33)        |        |               |                |         |        |        |        |         |        |

|                      |             |             |               |        |               |               |             |        |               |                |         |        |        |        |         |        |
|----------------------|-------------|-------------|---------------|--------|---------------|---------------|-------------|--------|---------------|----------------|---------|--------|--------|--------|---------|--------|
|                      | 169.84)     | 175.28)     |               |        | 1955.36)      | 2102.79)      |             |        | 425.70)       | 238.21)        | -1.75)  |        | 5.26)  | 2.18)  | -2.68)  |        |
| <b>21 GBD region</b> |             |             |               |        |               |               |             |        |               |                |         |        |        |        |         |        |
|                      | 125.19      | 118.55      |               |        | 1113.97       | 1145.61       |             |        | 444.97        | 229.83         | -2.34   |        | 5.89   | 2.63   | -2.85   |        |
| South Asia           | (74.92,     | (68.99,     | -0.18 (-0.28, | <0.001 | (783.67,      | (808.45,      | 0.10 (0.04, | 0.001  | (345.75,      | (184.29,       | (-2.94, | <0.001 | (4.46, | (2.12, | (-3.55, | <0.001 |
|                      | 179.37)     | 172.38)     | -0.10)        |        | 1462.33)      | 1523.36)      | 0.17)       |        | 553.25)       | 281.98)        | -1.73)  |        | 7.46)  | 3.28)  | -2.15)  |        |
|                      | 36.54       | 31.80       |               |        | 657.39        | 536.59        | -0.69       |        | 138.24        |                | -4.50   |        | 1.60   | 0.17   | -7.35   |        |
| East Asia            | (17.00,     | (15.36,     | -0.50 (-0.67, | <0.001 | (467.62,      | (378.22,      | (-0.75,     | <0.001 | (107.50,      | 37.61 (25.71,  | (-4.85, | <0.001 | (1.21, | (0.13, | (-7.92, | <0.001 |
|                      | 61.48)      | 51.93)      | -0.33)        |        | 884.70)       | 731.31)       | -0.64)      |        | 177.13)       | 54.38)         | -4.14)  |        | 2.12)  | 0.23)  | -6.78)  |        |
|                      | 40.04       | 44.03       |               |        | 532.34        | 582.08        |             |        | 134.73        |                | -2.88   |        | 1.64   | 0.44   | -4.40   |        |
| North Africa and     |             |             | 0.33 (0.30,   |        |               |               | 0.30 (0.26, |        |               | 57.39 (40.42,  |         |        |        |        |         |        |
| Middle East          | (20.48,     | (21.84,     | 0.36)         | <0.001 | (379.44,      | (405.00,      | 0.34)       | <0.001 | (87.02,       | 78.94)         | (-3.03, | <0.001 | (0.97, | (0.29, | (-4.56, | <0.001 |
|                      | 63.02)      | 69.30)      |               |        | 720.16)       | 797.72)       |             |        | 171.48)       |                | -2.73)  |        | 2.17)  | 0.64)  | -4.23)  |        |
|                      | 87.29       | 91.64       |               |        | 1265.79       | 1353.06       |             |        | 186.52        |                | -1.86   |        | 1.90   | 0.65   | -3.63   |        |
| Western              |             |             | 0.17 (0.15,   |        |               |               | 0.23 (0.22, |        |               | 107.97 (74.79, |         |        |        |        |         |        |
| Sub-Saharan Africa   | (43.00,     | (45.72,     | 0.19)         | <0.001 | (883.31,      | (944.35,      | 0.24)       | <0.001 | (133.58,      | 153.45)        | (-1.94, | <0.001 | (1.23, | (0.44, | (-3.73, | <0.001 |
|                      | 138.64)     | 145.62)     |               |        | 1737.38)      | 1855.22)      |             |        | 245.52)       |                | -1.79)  |        | 2.65)  | 0.97)  | -3.53)  |        |
|                      | 30.94       | 30.39       |               |        | 412.68        | 446.18        |             |        | 100.75        |                | -1.30   |        | 1.22   | 0.71   | -1.82   |        |
| Southeast Asia       | (15.54,     | (15.49,     | -0.07 (-0.14, | 0.029  | (295.71,      | (316.73,      | 0.26 (0.22, | <0.001 | (77.89,       | 68.80 (52.68,  | (-1.46, | <0.001 | (0.91, | (0.53, | (-2.08, | <0.001 |
|                      | 49.32)      | 47.88)      | -0.01)        |        | 555.98)       | 606.14)       | 0.30)       |        | 123.08)       | 85.02)         | -1.14)  |        | 1.53)  | 0.89)  | -1.57)  |        |
|                      | 124.70      | 128.97      |               |        | 1941.74       | 2126.22       |             |        | 251.47        | 157.09         | -1.60   |        | 2.40   | 0.84   | -3.55   |        |
| Eastern Sub-Saharan  |             |             | 0.11 (0.09,   |        |               |               | 0.32 (0.28, |        |               |                |         |        |        |        |         |        |
| Africa               | (63.47,     | (64.46,     | 0.13)         | <0.001 | (1372.83,     | (1500.30,     | 0.35)       | <0.001 | (177.28,      | (107.95,       | (-1.70, | <0.001 | (1.48, | (0.61, | (-3.66, | <0.001 |
|                      | 202.10)     | 203.17)     |               |        | 2659.60)      | 2909.64)      |             |        | 333.23)       | 225.20)        | -1.49)  |        | 3.34)  | 1.13)  | -3.43)  |        |
|                      | 35.07       | 38.35       |               |        | 552.83        | 594.64        |             |        | 76.65 (64.75, | 36.90 (24.34,  |         |        | 0.75   | 0.13   | -5.86   |        |
| Central Latin        |             |             | 0.32 (0.30,   |        |               |               | 0.26 (0.23, |        |               |                |         |        |        |        |         |        |
| America              | (19.03,     | (20.45,     | 0.34)         | <0.001 | (395.71,      | (427.55,      | 0.29)       | <0.001 | 92.77)        | 54.54)         | (-2.73, | <0.001 | (0.70, | (0.10, | (-6.43, | <0.001 |
|                      | 53.27)      | 58.99)      |               |        | 743.00)       | 802.28)       |             |        |               |                | -2.11)  |        | 0.82)  | 0.16)  | -5.29)  |        |
|                      | 89.58       | 90.03       |               |        | 1502.32       | 1546.77       |             |        | 155.43        |                | -1.77   |        | 1.26   | 0.28   | -4.98   |        |
| Tropical Latin       |             |             | 0.02 (-0.04,  |        |               |               | 0.10 (0.08, |        |               | 92.47 (60.57,  |         |        |        |        |         |        |
| America              | (47.52,     | (47.13,     | 0.09)         | 0.437  | (1072.82,     | (1094.75,     | 0.11)       | <0.001 | (123.48,      | 138.50)        | (-2.01, | <0.001 | (1.16, | (0.25, | (-5.43, | <0.001 |
|                      | 140.59)     | 141.34)     |               |        | 2014.06)      | 2095.85)      |             |        | 198.49)       |                | -1.54)  |        | 1.39)  | 0.32)  | -4.54)  |        |
|                      | 116.50      | 119.67      |               |        | 1961.09       | 2021.30       |             |        | 206.52        |                | -1.49   |        | 1.72   | 0.58   | -3.68   |        |
| Central Sub-Saharan  |             |             | 0.11 (0.07,   |        |               |               | 0.11 (0.09, |        |               | 134.12 (84.01, |         |        |        |        |         |        |
| Africa               | (56.93,     | (56.33,     | 0.14)         | <0.001 | (1356.15,     | (1411.78,     | 0.13)       | <0.001 | (122.57,      | 198.12)        | (-1.57, | <0.001 | (0.74, | (0.29, | (-3.79, | <0.001 |
|                      | 190.60)     | 194.20)     |               |        | 2732.37)      | 2755.46)      |             |        | 311.89)       |                | -1.40)  |        | 3.01)  | 1.07)  | -3.58)  |        |
|                      | 0.31 (0.11, | 0.20 (0.05, |               |        | 8.63 (6.50,   | 6.87 (5.08,   |             |        | 9.13 (8.36,   | 3.55 (3.12,    |         |        | 0.13   | 0.05   | -3.43   |        |
| Western Europe       |             |             | -1.50 (-1.59, | <0.001 |               |               | -0.82       |        |               |                |         |        |        |        |         |        |
|                      | 0.68)       | 0.47)       | -1.40)        |        | 11.28)        | 9.13)         | (-0.92,     | <0.001 | 10.01)        | 4.04)          | (-3.76, | <0.001 | (0.12, | (0.04, | (-4.02, | <0.001 |
|                      |             |             |               |        |               |               | -0.72)      |        |               |                |         |        | 0.14)  | 0.05)  | -2.85)  |        |
| High-income North    | 1.50 (0.67, | 1.14 (0.64, | -0.95 (-1.01, | <0.001 | 23.12 (16.14, | 17.78 (14.54, | -0.88       | <0.001 | 10.51 (9.62,  | 4.02 (3.53,    | -3.27   | <0.001 | 0.14   | 0.04   | -3.87   | <0.001 |





|                              | 2019                  | 2020                  | Change (2019-2020)   | Significance | 2019                      | 2020                      | Change (2019-2020)   | Significance | 2019                    | 2020                    | Change (2019-2020)   | Significance | 2019              | 2020              | Change (2019-2020)   | Significance |
|------------------------------|-----------------------|-----------------------|----------------------|--------------|---------------------------|---------------------------|----------------------|--------------|-------------------------|-------------------------|----------------------|--------------|-------------------|-------------------|----------------------|--------------|
| Global                       | 44.22                 | 54.20                 | 0.70 (0.56, 0.84)    | <0.001       | 594.84                    | 720.27                    | 0.68 (0.61, 0.75)    | <0.001       | 161.26                  | 114.66 (93.57, 140.62)  | -1.18                | <0.001       | 1.99              | 1.20              | -1.73                | <0.001       |
|                              | (22.75, 69.13)        | (27.84, 84.50)        |                      |              | (421.26, 807.35)          | (509.85, 979.94)          |                      |              | (134.51, 191.39)        |                         |                      |              | (1.66, 2.35)      | (0.99, 1.44)      | (-2.21, -1.25)       |              |
|                              |                       |                       |                      |              |                           |                           |                      |              |                         |                         |                      |              |                   |                   |                      |              |
| <b>SDI category</b>          |                       |                       |                      |              |                           |                           |                      |              |                         |                         |                      |              |                   |                   |                      |              |
| High                         | 0.68 (0.34, 1.23)     | 0.62 (0.38, 0.97)     | -0.35 (-1.05, 0.36)  | 0.336        | 14.66 (11.52, 18.54)      | 14.00 (11.58, 16.78)      | -0.15 (-0.72, 0.42)  | 0.604        | 11.25 (10.02, 12.84)    | 4.28 (3.71, 4.97)       | -3.31 (-3.60, -3.02) | <0.001       | 0.16 (0.14, 0.18) | 0.05 (0.05, 0.06) | -3.72 (-3.88, -3.55) | <0.001       |
|                              |                       |                       |                      |              |                           |                           |                      |              |                         |                         |                      |              |                   |                   |                      |              |
| High-middle                  | 18.91 (9.57, 29.98)   | 20.23 (10.50, 31.97)  | 0.24 (0.17, 0.30)    | <0.001       | 294.27 (210.17, 402.09)   | 296.43 (211.22, 403.50)   | 0.04 (-0.04, 0.12)   | 0.286        | 72.90 (61.55, 85.98)    | 33.83 (25.04, 45.43)    | -2.60 (-2.96, -2.25) | <0.001       | 0.88 (0.74, 1.04) | 0.29 (0.22, 0.40) | -3.68 (-4.23, -3.12) | <0.001       |
|                              |                       |                       |                      |              |                           |                           |                      |              |                         |                         |                      |              |                   |                   |                      |              |
| Middle                       | 45.88 (22.81, 73.82)  | 47.31 (24.12, 73.37)  | 0.11 (0.06, 0.17)    | <0.001       | 684.79 (482.92, 928.59)   | 661.70 (464.17, 902.14)   | -0.11 (-0.15, -0.07) | <0.001       | 140.11 (115.69, 168.88) | 81.35 (62.87, 104.82)   | -1.87 (-2.27, -1.46) | <0.001       | 1.61 (1.31, 1.93) | 0.74 (0.59, 0.92) | -2.66 (-3.24, -2.09) | <0.001       |
|                              |                       |                       |                      |              |                           |                           |                      |              |                         |                         |                      |              |                   |                   |                      |              |
| Low-middle                   | 73.67 (39.08, 112.02) | 77.39 (40.73, 119.01) | 0.20 (-0.01, 0.40)   | 0.061        | 837.04 (585.52, 1122.26)  | 920.67 (646.12, 1249.16)  | 0.36 (0.26, 0.46)    | <0.001       | 324.96 (261.99, 401.46) | 192.15 (149.50, 239.15) | -1.81 (-2.32, -1.29) | <0.001       | 4.28 (3.38, 5.39) | 2.22 (1.70, 2.86) | -2.24 (-2.97, -1.50) | <0.001       |
|                              |                       |                       |                      |              |                           |                           |                      |              |                         |                         |                      |              |                   |                   |                      |              |
| Low                          | 92.73 (47.59, 145.06) | 94.28 (47.23, 148.60) | 0.08 (0.02, 0.15)    | 0.010        | 1237.32 (873.44, 1691.11) | 1335.14 (946.26, 1826.64) | 0.28 (0.24, 0.31)    | <0.001       | 291.68 (219.52, 382.73) | 194.48 (151.68, 251.82) | -1.38 (-1.70, -1.07) | <0.001       | 3.49 (2.45, 4.70) | 1.96 (1.47, 2.59) | -1.97 (-2.38, -1.55) | <0.001       |
|                              |                       |                       |                      |              |                           |                           |                      |              |                         |                         |                      |              |                   |                   |                      |              |
| <b>21 GBD region</b>         |                       |                       |                      |              |                           |                           |                      |              |                         |                         |                      |              |                   |                   |                      |              |
| South Asia                   | 79.90 (44.26, 119.22) | 79.40 (43.31, 119.94) | 0.02 (-0.34, 0.39)   | 0.898        | 787.05 (540.19, 1050.47)  | 826.43 (565.08, 1121.31)  | 0.21 (0.00, 0.43)    | 0.046        | 447.52 (366.28, 543.30) | 258.36 (207.58, 317.21) | -1.84 (-2.50, -1.17) | <0.001       | 6.15 (4.95, 7.56) | 3.28 (2.61, 4.09) | -2.13 (-2.86, -1.40) | <0.001       |
|                              |                       |                       |                      |              |                           |                           |                      |              |                         |                         |                      |              |                   |                   |                      |              |
| East Asia                    | 35.34 (16.26, 60.26)  | 30.00 (13.96, 50.54)  | -0.56 (-0.73, -0.38) | <0.001       | 605.97 (425.30, 833.29)   | 472.90 (329.39, 651.57)   | -0.86 (-0.89, -0.82) | <0.001       | 104.29 (79.43, 132.34)  | 37.44 (26.04, 52.57)    | -3.55 (-3.80, -3.30) | <0.001       | 1.13 (0.83, 1.46) | 0.22 (0.16, 0.29) | -5.62 (-6.04, -5.19) | <0.001       |
|                              |                       |                       |                      |              |                           |                           |                      |              |                         |                         |                      |              |                   |                   |                      |              |
| North Africa and Middle East | 37.43 (18.82, 58.83)  | 40.89 (20.40, 64.12)  | 0.31 (0.25, 0.36)    | <0.001       | 480.30 (339.34, 650.11)   | 516.69 (356.02, 704.70)   | 0.24 (0.19, 0.30)    | <0.001       | 87.74 (56.45, 140.48)   | 46.55 (30.46, 68.31)    | -2.14 (-2.40, -1.88) | <0.001       | 0.97 (0.53, 1.71) | 0.32 (0.16, 0.55) | -3.68 (-3.94, -3.42) | <0.001       |
|                              |                       |                       |                      |              |                           |                           |                      |              |                         |                         |                      |              |                   |                   |                      |              |
| Western Sub-Saharan Africa   | 81.73 (39.45, 131.45) | 84.38 (41.22, 136.43) | 0.11 (0.10, 0.12)    | <0.001       | 1215.41 (848.21, 1672.17) | 1268.01 (889.98, 1746.40) | 0.15 (0.14, 0.16)    | <0.001       | 125.13 (86.73, 173.62)  | 92.31 (61.05, 134.11)   | -1.04 (-1.14, -0.94) | <0.001       | 1.01 (0.61, 1.53) | 0.47 (0.27, 0.74) | -2.58 (-2.82, -2.33) | <0.001       |
|                              |                       |                       |                      |              |                           |                           |                      |              |                         |                         |                      |              |                   |                   |                      |              |
| Southeast Asia               | 21.89                 | 21.94                 | 0.01 (-0.11, 0.824)  | 0.824        | 294.08                    | 316.52                    | 0.24 (0.18, 0.31)    | <0.001       | 86.84 (66.12, 173.62)   | 57.74 (42.22, 134.11)   | -1.36                | <0.001       | 1.09              | 0.64              | -1.78                | <0.001       |

|                             |                   |                   |                      |        |                      |                      |                      |        |                      |                      |                      |              |                   |                   |                      |
|-----------------------------|-------------------|-------------------|----------------------|--------|----------------------|----------------------|----------------------|--------|----------------------|----------------------|----------------------|--------------|-------------------|-------------------|----------------------|
| Eastern Sub-Saharan Africa  | (10.75, 35.33)    | (10.80, 35.45)    | 0.14                 |        | (205.90, 396.27)     | (225.42, 435.93)     | 0.31                 |        | 110.33)              | 71.66)               | (-1.57, -1.15)       | (0.80, 1.44) | (0.44, 0.80)      | (-2.04, -1.53)    |                      |
|                             | 111.63            | 110.97            |                      |        | 1701.06              | 1850.78              |                      |        | 169.61               | 131.95 (91.35,       | -0.84                | 1.33         | 0.65              | -2.41             |                      |
|                             | (55.96, 179.36)   | (53.15, 178.85)   | -0.02 (-0.04, 0.01)  | 0.162  | (1205.25, 2331.62)   | (1297.67, 2540.15)   | 0.30 (0.24, 0.35)    | <0.001 | (119.95, 236.96)     | 188.35)              | (-0.97, -0.71)       | <0.001       | (0.89, 1.99)      | (0.45, 0.93)      | (-2.59, -2.23)       |
|                             | 29.64             | 32.58             |                      |        | 430.27               | 465.17               |                      |        | 53.75 (43.81,        | 29.72 (19.62,        | -2.02                | 0.50         | 0.11              | -5.00             |                      |
|                             | (15.26, 47.50)    | (16.62, 51.58)    | 0.33 (0.29, 0.37)    | <0.001 | (304.21, 584.64)     | (330.28, 635.00)     | 0.27 (0.25, 0.29)    | <0.001 | 67.78)               | 44.05)               | (-2.13, -1.90)       | <0.001       | (0.45, 0.55)      | (0.09, 0.13)      | (-5.38, -4.62)       |
| Tropical Latin America      | 82.56             | 81.87             |                      |        | 1221.00              | 1213.51              | -0.02                |        | 125.10               | 75.85 (49.53,        | -1.72                | 1.00         | 0.26              | -4.39             |                      |
|                             | (41.89, 129.43)   | (41.43, 127.69)   | -0.03 (-0.04, -0.01) | 0.002  | (852.92, 1684.72)    | (856.41, 1647.86)    | (-0.03, -0.02)       | <0.001 | (97.25, 163.34)      | 114.21)              | (-1.93, -1.51)       | <0.001       | (0.90, 1.12)      | (0.23, 0.29)      | (-4.78, -4.01)       |
|                             | 109.07            | 110.82            |                      |        | 1907.68              | 1919.27              |                      |        | 163.27               | 133.94 (83.20,       | -0.69                | 1.09         | 0.63              | -1.90             |                      |
| Central Sub-Saharan Africa  | (53.23, 177.85)   | (51.27, 183.77)   | 0.05 (0.02, 0.09)    | 0.003  | (1347.55, 2598.85)   | (1332.95, 2640.80)   | 0.02 (-0.00, 0.05)   | 0.057  | (104.30, 243.09)     | 210.98)              | (-0.77, -0.61)       | <0.001       | (0.53, 1.99)      | (0.25, 1.51)      | (-2.02, -1.78)       |
|                             | 0.35 (0.12, 0.72) | 0.22 (0.06, 0.49) | -1.58 (-1.71, -1.46) | <0.001 | 7.73 (5.76, 10.37)   | 6.05 (4.32, 8.27)    | -0.88 (-0.98, -0.79) | <0.001 | 11.82 (10.78, 13.07) | 3.82 (3.30, 4.39)    | -3.94 (-4.51, -3.35) | <0.001       | 0.17 (0.16, 0.19) | 0.05 (0.04, 0.06) | -4.12 (-4.71, -3.52) |
| High-income North America   | 0.89 (0.34, 1.82) | 0.54 (0.27, 0.92) | -1.66 (-1.78, -1.55) | <0.001 | 18.92 (13.89, 25.00) | 13.68 (11.45, 16.19) | -1.10 (-1.13, -1.07) | <0.001 | 9.13 (8.22, 10.11)   | 3.82 (3.35, 4.46)    | -2.98 (-3.89, -2.06) | <0.001       | 0.12 (0.11, 0.13) | 0.05 (0.04, 0.05) | -3.34 (-4.53, -2.13) |
|                             | 55.10             | 59.89             |                      |        | 784.03               | 860.78               |                      |        | 217.65               | 110.23 (83.41,       | -2.35                | 2.71         | 1.03              | -3.29             |                      |
| Central Asia                | (28.57, 86.98)    | (30.09, 93.10)    | 0.28 (0.26, 0.31)    | <0.001 | (550.74, 1065.80)    | (604.73, 1169.15)    | 0.32 (0.30, 0.34)    | <0.001 | (192.54, 246.55)     | 142.79)              | (-2.86, -1.83)       | <0.001       | (2.46, 2.99)      | (0.81, 1.31)      | (-4.09, -2.48)       |
|                             | 2.50 (1.61, 3.67) | 1.75 (1.07, 2.67) | -1.17 (-1.35, -0.99) | <0.001 | 30.51 (23.85, 37.42) | 24.78 (19.47, 30.40) | -0.71 (-0.84, -0.58) | <0.001 | 54.42 (48.27, 60.56) | 13.01 (10.48, 16.46) | -4.56 (-5.47, -3.64) | <0.001       | 0.80 (0.70, 0.89) | 0.18 (0.14, 0.23) | -4.78 (-5.75, -3.81) |
| Southern Sub-Saharan Africa | 103.42            | 104.75            |                      |        | 1630.52              | 1669.39              |                      |        | 159.19               | 155.95               | -0.04                | 1.22         | 1.14              | -0.17             |                      |
|                             | (51.63, 164.69)   | (50.66, 167.84)   | 0.05 (0.03, 0.06)    | <0.001 | (1144.99, 2244.92)   | (1174.42, 2306.60)   | 0.08 (0.07, 0.09)    | <0.001 | (112.06, 219.73)     | (105.44, 222.32)     | (-0.26, 0.17)        | 0.710        | (0.82, 1.75)      | (0.67, 1.86)      | (-0.56, 0.23)        |
| High-income Asia Pacific    | 0.35 (0.11, 0.77) | 0.18 (0.05, 0.44) | -2.28 (-2.43, -2.13) | <0.001 | 11.88 (9.04, 15.42)  | 9.09 (6.98, 11.64)   | -0.91 (-1.05, -0.77) | <0.001 | 8.31 (7.07, 9.54)    | 2.68 (2.23, 3.12)    | -3.76 (-4.14, -3.38) | <0.001       | 0.12 (0.10, 0.13) | 0.03 (0.03, 0.04) | -4.18 (-4.60, -3.75) |
|                             | 3.36 (2.04, 4.07) | 2.79 (1.60, 4.07) | -0.60 (-0.86, -0.34) | <0.001 | 45.04 (34.09, 56.00) | 42.74 (31.62, 53.87) | -0.05 (-0.19, 0.09)  | 0.819  | 47.02 (42.43, 51.61) | 9.62 (7.99, 11.25)   | -5.56 (-6.15, -4.97) | <0.001       | 0.67 (0.67, 0.67) | 0.11 (0.11, 0.11) | -6.25 (-6.25, -6.25) |

|                          | 2019              | 2020              | 2021                 | 2022   | 2023                 | 2024                 | 2025                  | 2026   | 2027                  | 2028                   | 2029                  | 2030   | 2031          | 2032          | 2033                  | 2034   |
|--------------------------|-------------------|-------------------|----------------------|--------|----------------------|----------------------|-----------------------|--------|-----------------------|------------------------|-----------------------|--------|---------------|---------------|-----------------------|--------|
| Andean Latin America     | 4.88)             | 4.16)             | -0.34)               | 0.166  | 58.57)               | 55.83)               | (-0.49, 0.39)         | 0.502  | 51.39)                | 11.48)                 | (-6.19, -4.93)        | <0.001 | (0.61, 0.74)  | (0.09, 0.13)  | (-6.96, -5.52)        | <0.001 |
|                          | 72.56)            | 72.33)            | -0.02 (-0.05, 0.01)  | 0.166  | 1066.63)             | 1067.00)             | -0.01                 | 0.502  | 90.42 (63.30, 126.97) | 65.06 (41.04, 99.90)   | (-1.19, -1.10)        | <0.001 | (0.41, 0.85)  | (0.14, 0.31)  | (-3.82, -3.12)        | <0.001 |
|                          | 114.68)           | 114.37)           |                      |        | 1467.71)             | 1452.37)             | 0.02)                 |        |                       |                        |                       |        |               |               |                       |        |
| Caribbean                | 69.07)            | 74.29)            | 0.25 (0.21, 0.29)    | <0.001 | 1025.52)             | 1061.87)             | 0.12 (0.10, 0.14)     | <0.001 | 142.66)               | 103.49 (67.85, 157.63) | (-1.04, -1.31)        | <0.001 | (1.40, 1.05)  | (0.79, 0.42)  | (-1.87, -2.38)        | <0.001 |
|                          | (34.18, 109.20)   | (37.66, 115.58)   |                      |        | (717.79, 1404.16)    | (744.24, 1447.15)    |                       |        | (108.24, 184.16)      |                        |                       |        | (1.05, 1.92)  | (0.42, 1.49)  | (-2.38, -1.36)        | <0.001 |
| Southern Latin America   | 38.00)            | 41.77)            | 0.32 (0.23, 0.41)    | <0.001 | 579.00)              | 638.05)              | 0.33 (0.22, 0.43)     | <0.001 | 64.38 (49.56, 83.07)  | 39.31 (25.05, 60.14)   | (-1.67, -1.94)        | <0.001 | (0.55, 0.46)  | (0.13, 0.10)  | (-4.82, -5.60)        | <0.001 |
|                          | (19.07, 60.32)    | (21.33, 67.04)    |                      |        | (405.36, 786.82)     | (451.65, 869.50)     |                       |        |                       |                        |                       |        | (0.46, 0.66)  | (0.10, 0.16)  | (-5.60, -4.04)        | <0.001 |
| Oceania                  | 36.96)            | 38.99)            | 0.19 (0.17, 0.20)    | <0.001 | 644.83)              | 701.05)              | 0.29 (0.23, 0.34)     | <0.001 | 659.65)               | 605.26)                | (-0.35, -0.66)        | 0.034  | (9.44, 5.07)  | (8.59, 4.34)  | (-0.38, -0.72)        | 0.027  |
|                          | (15.48, 66.88)    | (17.02, 69.03)    |                      |        | (436.76, 882.36)     | (472.22, 980.80)     |                       |        | (362.98, 1143.24)     | (320.88, 1007.81)      |                       |        | (5.07, 16.69) | (4.34, 14.70) | (-0.72, -0.04)        | 0.027  |
| Australasia              | 0.50 (0.14, 1.17) | 0.39 (0.09, 0.95) | -0.80 (-0.92, -0.67) | <0.001 | 19.07 (13.22, 25.93) | 17.89 (12.37, 24.64) | (-0.20, -0.30, -0.11) | <0.001 | 27.39 (22.47, 33.35)  | 9.96 (7.70, 12.68)     | (-3.39, -3.98, -2.79) | <0.001 | (0.40, 0.32)  | (0.14, 0.10)  | (-3.59, -4.22, -2.96) | <0.001 |
|                          |                   |                   |                      |        |                      |                      |                       |        |                       |                        |                       |        |               |               |                       |        |
| <b>25-29 years Women</b> |                   |                   |                      |        |                      |                      |                       |        |                       |                        |                       |        |               |               |                       |        |
| Global                   | 43.51)            | 51.53)            | 0.60 (0.53, 0.67)    | <0.001 | 756.04)              | 912.03)              | 0.65 (0.61, 0.69)     | <0.001 | 198.76)               | 117.65 (94.35, 147.87) | (-1.75, -2.23, -1.28) | <0.001 | (2.64, 3.12)  | (1.21, 1.47)  | (-2.63, -2.06)        | <0.001 |
|                          | (26.87, 62.35)    | (31.59, 73.86)    |                      |        | (548.79, 1000.05)    | (650.31, 1201.72)    |                       |        | (164.50, 232.86)      |                        |                       |        | (2.64, 3.12)  | (1.21, 1.47)  | (-2.63, -2.06)        | <0.001 |
| <b>SDI category</b>      |                   |                   |                      |        |                      |                      |                       |        |                       |                        |                       |        |               |               |                       |        |
| High                     | 1.23 (0.60, 2.07) | 1.07 (0.66, 1.61) | -0.51 (-0.65, -0.37) | <0.001 | 21.06 (16.16, 27.16) | 19.83 (16.58, 23.49) | (-0.20, -0.48, 0.08)  | 0.166  | 17.44 (15.78, 19.34)  | 6.74 (5.83, 7.86)      | (-3.23, -3.73, -2.72) | <0.001 | (0.26, 0.29)  | (0.09, 0.11)  | (-3.58, -3.16)        | <0.001 |
|                          |                   |                   |                      |        |                      |                      |                       |        |                       |                        |                       |        |               |               |                       |        |
| High-middle              | 17.54)            | 18.31)            | 0.15 (0.10, 0.21)    | <0.001 | 358.40)              | 379.01)              | 0.18 (0.10, 0.26)     | <0.001 | 92.33 (78.61, 107.27) | 33.96 (25.46, 45.18)   | (-3.57, -4.29, -2.84) | <0.001 | (1.22, 1.43)  | (0.26, 0.32)  | (-5.14, -4.24)        | <0.001 |
|                          | (11.04, 25.85)    | (11.31, 26.77)    |                      |        | (259.93, 474.81)     | (272.31, 501.24)     |                       |        |                       |                        |                       |        | (1.05, 1.43)  | (0.21, 0.32)  | (-6.03, -4.24)        | <0.001 |
| Middle                   | 43.04)            | 44.12)            | 0.10 (0.01, 0.19)    | 0.035  | 832.81)              | 853.20)              | 0.08 (0.05, 0.12)     | <0.001 | 211.08)               | 86.84 (66.60, 112.08)  | (-3.21, -3.88, -2.54) | <0.001 | (2.78, 3.25)  | (0.75, 0.93)  | (-4.36, -5.42, -3.30) | <0.001 |
|                          | (25.87, 63.42)    | (26.61, 64.62)    |                      |        | (593.18, 1099.58)    | (609.91, 1125.66)    |                       |        | (179.69, 246.93)      |                        |                       |        | (2.37, 3.25)  | (0.60, 0.93)  | (-5.42, -3.30)        | <0.001 |
| Low-middle               | 85.05)            | 83.53)            | -0.03 (-0.21, 0.15)  | 0.784  | 1289.27)             | 1343.54)             | 0.16 (0.10, 0.22)     | <0.001 | 366.25)               | 216.01)                | (-1.79, -1.79)        | <0.001 | (4.95, 4.95)  | (2.47, 2.47)  | (-2.34, -2.34)        | <0.001 |

|                              |                 |                 |                      |        |                    |                    |                   |        |                  |                        |                |        |              |              |                |  |
|------------------------------|-----------------|-----------------|----------------------|--------|--------------------|--------------------|-------------------|--------|------------------|------------------------|----------------|--------|--------------|--------------|----------------|--|
|                              | (53.01, 119.87) | (51.48, 118.03) | 0.16                 |        | (923.69, 1708.52)  | (951.72, 1780.80)  | 0.22              |        | (277.38, 453.32) | (165.79, 274.08)       | (-2.19, -1.40) |        | (3.58, 6.32) | (1.82, 3.24) | (-2.85, -1.83) |  |
|                              | 90.75           | 91.76           |                      |        | 1539.50            | 1624.32            |                   |        | 357.33           | 203.53                 | -1.94          |        | 4.62         | 2.06         | -2.73          |  |
| Low                          | (54.80, 129.79) | (54.88, 133.58) | 0.04 (0.01, 0.07)    | 0.015  | (1096.13, 2045.10) | (1156.20, 2136.22) | 0.19 (0.16, 0.22) | <0.001 | (260.06, 464.79) | (152.09, 265.08)       | (-2.12, -1.76) | <0.001 | (3.07, 6.27) | (1.47, 2.78) | (-2.94, -2.53) |  |
| <b>21 GBD region</b>         |                 |                 |                      |        |                    |                    |                   |        |                  |                        |                |        |              |              |                |  |
|                              | 96.07           | 90.08           |                      |        | 1340.25            | 1334.81            | -0.02             |        | 458.20           | 270.77                 | -1.81          |        | 6.40         | 3.37         | -2.22          |  |
| South Asia                   | (61.02, 134.09) | (56.19, 126.72) | -0.23 (-0.32, -0.14) | <0.001 | (944.72, 1763.34)  | (940.13, 1753.69)  | (-0.13, 0.09)     | 0.698  | (342.74, 570.16) | (210.26, 346.60)       | (-2.42, -1.20) | <0.001 | (4.62, 8.19) | (2.55, 4.36) | (-2.92, -1.52) |  |
|                              | 30.69           | 26.72           |                      |        | 651.56             | 560.57             | -0.52             |        | 196.28           |                        | -5.43          |        | 2.68         | 0.24         | -8.21          |  |
| East Asia                    | (17.24, 47.33)  | (15.59, 40.22)  | -0.49 (-0.57, -0.42) | <0.001 | (460.67, 866.56)   | (395.43, 742.89)   | (-0.54, -0.50)    | <0.001 | (153.37, 245.33) | 42.20 (29.68, 58.43)   | (-6.37, -4.48) | <0.001 | (2.04, 3.44) | (0.17, 0.33) | (-9.37, -7.04) |  |
|                              | 33.50           | 35.73           |                      |        | 587.74             | 628.87             |                   |        | 157.30           |                        | -2.81          |        | 2.10         | 0.62         | -4.10          |  |
| North Africa and Middle East | (20.28, 48.64)  | (21.47, 51.73)  | 0.22 (0.20, 0.24)    | <0.001 | (415.63, 781.30)   | (440.20, 848.11)   | 0.23 (0.19, 0.28) | <0.001 | (109.47, 196.94) | 68.00 (49.62, 89.45)   | (-2.95, -2.67) | <0.001 | (1.37, 2.69) | (0.42, 0.86) | (-4.27, -3.94) |  |
|                              | 73.26           | 76.11           |                      |        | 1322.44            | 1408.94            |                   |        | 155.38           |                        | -1.58          |        | 1.51         | 0.51         | -3.67          |  |
| Western Sub-Saharan Africa   | (43.37, 108.10) | (45.32, 113.18) | 0.13 (0.13, 0.14)    | <0.001 | (931.23, 1778.54)  | (983.94, 1883.96)  | 0.22 (0.21, 0.23) | <0.001 | (109.68, 207.51) | 97.94 (65.99, 139.62)  | (-1.62, -1.53) | <0.001 | (0.92, 2.17) | (0.34, 0.75) | (-3.74, -3.60) |  |
|                              | 26.14           | 25.05           |                      |        | 447.29             | 465.83             |                   |        | 118.09           |                        | -1.46          |        | 1.57         | 0.88         | -1.90          |  |
| Southeast Asia               | (15.64, 37.93)  | (15.18, 36.92)  | -0.16 (-0.20, -0.11) | <0.001 | (321.92, 595.72)   | (333.02, 622.60)   | 0.14 (0.11, 0.17) | <0.001 | (91.68, 141.83)  | 76.39 (60.18, 95.06)   | (-1.74, -1.17) | <0.001 | (1.18, 1.92) | (0.67, 1.10) | (-2.31, -1.50) |  |
|                              | 102.62          | 105.13          |                      |        | 1974.76            | 2130.36            |                   |        | 229.88           |                        | -1.57          |        | 2.23         | 0.71         | -3.81          |  |
| Eastern Sub-Saharan Africa   | (59.81, 152.39) | (61.07, 158.19) | 0.08 (0.06, 0.09)    | <0.001 | (1406.27, 2641.89) | (1528.41, 2823.49) | 0.27 (0.21, 0.32) | <0.001 | (151.00, 311.34) | 144.70 (98.81, 206.70) | (-1.65, -1.50) | <0.001 | (1.13, 3.35) | (0.52, 0.97) | (-4.00, -3.63) |  |
|                              | 27.96           | 29.89           |                      |        | 584.60             | 625.66             |                   |        | 100.24           |                        | -2.94          |        | 1.18         | 0.19         | -5.90          |  |
| Central Latin America        | (17.36, 40.59)  | (17.94, 43.79)  | 0.26 (0.23, 0.30)    | <0.001 | (429.19, 749.21)   | (455.78, 808.46)   | 0.26 (0.22, 0.29) | <0.001 | (87.05, 116.33)  | 41.22 (28.28, 58.69)   | (-3.20, -2.67) | <0.001 | (1.09, 1.27) | (0.14, 0.24) | (-6.37, -5.43) |  |
|                              | 71.62           | 71.88           |                      |        | 1594.51            | 1637.85            |                   |        | 175.86           |                        | -1.82          |        | 1.63         | 0.40         | -4.69          |  |
| Tropical Latin America       | (42.02, 106.63) | (42.04, 108.00) | 0.02 (0.00, 0.04)    | 0.052  | (1163.08, 2054.87) | (1181.94, 2113.51) | 0.10 (0.08, 0.11) | <0.001 | (141.53, 218.21) | 102.23 (68.75, 146.18) | (-2.14, -1.50) | <0.001 | (1.49, 1.79) | (0.36, 0.45) | (-5.10, -4.29) |  |
|                              | 96.15           | 97.98           |                      |        | 1968.92            | 2019.91            |                   |        | 218.07           |                        | -1.63          |        | 2.04         | 0.66         | -3.82          |  |
| Central Sub-Saharan Africa   | (53.70, 146.92) | (53.62, 146.66) | 0.07 (0.05, 0.10)    | <0.001 | (1376.35, 2632.27) | (1440.71, 2675.68) | 0.09 (0.07, 0.11) | <0.001 | (143.89, 318.39) | 135.66 (88.64, 195.14) | (-1.72, -1.54) | <0.001 | (1.06, 3.42) | (0.35, 1.23) | (-4.04, -3.60) |  |

|                             |             |             |               |        |               |               |             |        |               |               |         |        |         |        |         |         |
|-----------------------------|-------------|-------------|---------------|--------|---------------|---------------|-------------|--------|---------------|---------------|---------|--------|---------|--------|---------|---------|
| Western Europe              | 0.38 (0.12, | 0.24 (0.07, | -1.68 (-1.80, | <0.001 | 9.39 (7.05,   | 7.30 (5.37,   | -0.89       | <0.001 | 12.00 (10.99, | 3.95 (3.51,   | -3.82   | <0.001 | 0.19    | 0.06   | -4.06   |         |
|                             | 0.81)       | 0.56)       | -1.55)        |        | 12.52)        | 9.94)         | (-1.00,     |        | 13.04)        | 4.50)         | (-4.30, |        | 0.20)   | 0.07)  | (-4.70, | <0.001  |
|                             |             |             |               |        |               |               | (-0.77)     |        |               |               |         |        | (-3.33) |        |         |         |
| High-income North America   | 2.05 (0.91, | 1.51 (0.87, | -1.06 (-1.17, | <0.001 | 31.28 (22.30, | 24.12 (20.30, | -0.88       | <0.001 | 17.66 (16.16, | 7.54 (6.61,   | -2.88   | <0.001 | 0.26    | 0.10   | -3.28   |         |
|                             | 3.47)       | 2.24)       | -0.94)        |        | 42.35)        | 28.58)        | (-0.92,     |        | 19.13)        | 8.67)         | (-3.40, |        | 0.27)   | 0.11)  | (-4.05, | <0.001  |
|                             |             |             |               |        |               |               | (-0.85)     |        |               |               |         |        | (-2.36) |        |         |         |
| Central Asia                | 46.01       | 48.60       | 0.19 (0.16,   | <0.001 | 945.27        | 1015.17       | 0.25 (0.23, | <0.001 | 351.38        | 149.30        | -2.85   | <0.001 | 4.98    | 1.64   | -3.70   |         |
|                             | (28.15,     | (28.91,     | 0.22)         |        | (678.09,      | (727.43,      | 0.27)       |        | (317.41,      | (117.52,      | (-3.62, |        | 4.51,   | 1.28,  | (-4.55, | <0.001  |
|                             | 67.74)      | 71.94)      |               |        | 1239.30)      | 1330.79)      |             |        | 384.86)       | 190.82)       | (-2.07) |        | 5.41)   | 2.11)  | (-2.85) |         |
| Eastern Europe              | 2.72 (1.45, | 1.99 (1.04, | -1.03 (-1.11, | <0.001 | 35.71 (27.95, | 30.76 (24.36, | -0.50       | <0.001 | 44.04 (38.48, | 9.78 (7.57,   | -4.97   | <0.001 | 0.69    | 0.13   | -5.37   |         |
|                             | 4.23)       | 3.15)       | -0.95)        |        | 43.65)        | 38.33)        | (-0.57,     |        | 48.31)        | 12.46)        | (-6.15, |        | 0.60,   | 0.10,  | (-6.66, | <0.001  |
|                             |             |             |               |        |               |               | (-0.44)     |        |               |               |         |        | (-3.77) | 0.75)  | 0.18)   | (-4.06) |
| Southern Sub-Saharan Africa | 95.81       | 96.87       | 0.03 (0.02,   | <0.001 | 1896.92       | 1927.74       | 0.06 (0.04, | <0.001 | 329.87        | 165.77        | -2.35   | <0.001 | 3.91    | 1.22   | -3.90   |         |
|                             | (55.41,     | (56.28,     | 0.05)         |        | (1361.26,     | (1367.65,     | 0.07)       |        | (248.66,      | (114.05,      | (-3.18, |        | 2.63,   | 0.73,  | (-5.29, | <0.001  |
|                             | 144.58)     | 146.39)     |               |        | 2548.87)      | 2546.04)      |             |        | 418.17)       | 227.75)       | (-1.50) |        | 5.12)   | 1.90)  | (-2.48) |         |
| High-income Asia Pacific    | 0.41 (0.12, | 0.20 (0.05, | -2.50 (-2.67, | <0.001 | 12.51 (9.33,  | 9.17 (6.94,   | -1.08       | <0.001 | 12.67 (10.49, | 3.33 (2.77,   | -4.54   | <0.001 | 0.19    | 0.05   | -4.96   |         |
|                             | 0.88)       | 0.48)       | -2.33)        |        | 16.69)        | 11.87)        | (-1.16,     |        | 15.16)        | 3.98)         | (-5.02, |        | 0.16,   | 0.04,  | (-5.49, | <0.001  |
|                             |             |             |               |        |               |               | (-1.01)     |        |               |               |         |        | (-4.07) | 0.24)  | 0.05)   | (-4.42) |
| Central Europe              | 2.94 (1.95, | 2.03 (1.28, | -1.32 (-1.61, | <0.001 | 54.21 (41.39, | 43.50 (33.08, | -0.82       | <0.001 | 48.07 (43.95, | 9.47 (7.73,   | -5.33   | <0.001 | 0.74    | 0.12   | -6.07   |         |
|                             | 4.17)       | 3.03)       | -1.03)        |        | 69.44)        | 54.53)        | (-1.08,     |        | 52.77)        | 11.43)        | (-5.86, |        | 0.67,   | 0.09,  | (-6.61, | <0.001  |
|                             |             |             |               |        |               |               | (-0.57)     |        |               |               |         |        | (-4.80) | 0.81)  | 0.15)   | (-5.52) |
| Andean Latin America        | 66.43       | 66.25       | -0.01 (-0.02, | <0.001 | 1345.60       | 1384.00       | 0.09 (0.08, | <0.001 | 131.64        | 81.83 (51.46, | -1.68   | <0.001 | 1.10    | 0.26   | -4.95   |         |
|                             | (39.37,     | (38.59,     | -0.01)        |        | (977.72,      | (1000.07,     | 0.11)       |        | (95.82,       | 121.02)       | (-1.85, |        | 0.79,   | 0.16,  | (-5.71, | <0.001  |
|                             | 98.89)      | 98.15)      |               |        | 1774.27)      | 1792.60)      |             |        | 174.62)       |               | (-1.50) |        | 1.48)   | 0.39)  | (-4.17) |         |
| Caribbean                   | 63.53       | 69.90       | 0.34 (0.31,   | <0.001 | 1303.48       | 1384.19       | 0.21 (0.19, | <0.001 | 332.11        | 219.57        | -1.37   | <0.001 | 4.39    | 2.50   | -1.86   |         |
|                             | (37.79,     | (40.75,     | 0.36)         |        | (929.94,      | (995.71,      | 0.23)       |        | (213.62,      | (137.40,      | (-1.55, |        | 2.55,   | 1.29,  | (-2.11, | <0.001  |
|                             | 93.29)      | 103.68)     |               |        | 1707.86)      | 1801.74)      |             |        | 469.98)       | 343.34)       | (-1.18) |        | 6.61)   | 4.48)  | (-1.60) |         |
| Southern Latin America      | 30.30       | 32.56       | 0.25 (0.18,   | <0.001 | 686.16        | 762.94        | 0.36 (0.24, | <0.001 | 85.37 (69.01, | 47.11 (31.29, | -2.08   | <0.001 | 0.85    | 0.18   | -5.34   |         |
|                             | (17.82,     | (19.79,     | 0.32)         |        | (494.62,      | (562.09,      | 0.48)       |        | 108.02)       | 68.65)        | (-2.49, |        | 0.72,   | 0.14,  | (-6.26, | <0.001  |
|                             | 45.45)      | 48.17)      |               |        | 887.97)       | 979.23)       |             |        |               |               | (-1.66) |        | 1.01)   | 0.23)  | (-4.41) |         |
| Oceania                     | 42.93       | 46.03       | 0.25 (0.23,   | <0.001 | 771.33        | 839.41        | 0.30 (0.23, | <0.001 | 568.42        | 522.64        | -0.29   | 0.061  | 8.63    | 7.83   | -0.36   |         |
|                             | (25.16,     | (26.61,     | 0.27)         |        | (545.80,      | (592.27,      | 0.38)       |        | (313.09,      | (272.67,      | (-0.60, |        | 4.52,   | (3.79, | (-0.64, | 0.011   |
|                             | 64.08)      | 69.53)      |               |        | 1049.77)      | 1149.14)      |             |        | 919.15)       | 866.07)       | 0.01)   |        | 14.36)  | 13.52) | (-0.08) |         |

|                              |                       |                       |                      |        |                           |                           |                      |        |                         |                         |                      |        |                   |                   |                      |        |
|------------------------------|-----------------------|-----------------------|----------------------|--------|---------------------------|---------------------------|----------------------|--------|-------------------------|-------------------------|----------------------|--------|-------------------|-------------------|----------------------|--------|
| Australasia                  | 1.35 (0.44, 2.59)     | 1.08 (0.32, 2.12)     | -0.76 (-0.93, -0.58) | <0.001 | 29.71 (20.78, 40.40)      | 28.24 (19.89, 38.57)      | -0.15 (-0.25, -0.04) | 0.007  | 31.19 (25.63, 37.46)    | 12.94 (10.17, 16.26)    | -2.83 (-4.80, -0.82) | 0.006  | 0.48 (0.39, 0.58) | 0.19 (0.15, 0.24) | -3.04 (-5.14, -0.88) | 0.006  |
| <b>Men</b>                   |                       |                       |                      |        |                           |                           |                      |        |                         |                         |                      |        |                   |                   |                      |        |
| Global                       | 35.63 (21.77, 51.33)  | 41.64 (25.10, 60.12)  | 0.55 (0.41, 0.69)    | <0.001 | 602.04 (427.79, 805.48)   | 711.36 (501.74, 954.64)   | 0.58 (0.53, 0.64)    | <0.001 | 167.66 (139.98, 196.92) | 114.36 (93.74, 139.65)  | -1.33 (-1.60, -1.06) | <0.001 | 2.25 (1.84, 2.65) | 1.30 (1.10, 1.52) | -1.86 (-2.30, -1.43) | <0.001 |
| <b>SDI category</b>          |                       |                       |                      |        |                           |                           |                      |        |                         |                         |                      |        |                   |                   |                      |        |
| High                         | 0.91 (0.46, 1.58)     | 0.82 (0.52, 1.24)     | -0.45 (-0.79, -0.10) | 0.011  | 18.12 (14.22, 23.01)      | 17.52 (14.55, 20.85)      | -0.04 (-0.54, 0.46)  | 0.871  | 14.84 (13.59, 16.41)    | 6.21 (5.40, 7.18)       | -2.97 (-3.24, -2.70) | <0.001 | 0.22 (0.21, 0.25) | 0.08 (0.07, 0.10) | -3.32 (-3.52, -3.12) | <0.001 |
| High-middle                  | 16.57 (10.06, 24.46)  | 16.15 (9.86, 23.84)   | -0.10 (-0.21, 0.01)  | 0.090  | 302.57 (216.94, 407.86)   | 295.16 (209.95, 397.78)   | -0.08 (-0.12, -0.05) | <0.001 | 80.53 (69.47, 92.51)    | 35.96 (27.50, 46.69)    | -2.67 (-3.13, -2.21) | <0.001 | 1.07 (0.94, 1.23) | 0.35 (0.27, 0.46) | -3.66 (-4.29, -3.03) | <0.001 |
| Middle                       | 39.37 (23.22, 58.07)  | 39.35 (23.64, 57.63)  | -0.01 (-0.16, 0.14)  | 0.920  | 711.51 (500.83, 950.38)   | 702.44 (493.25, 943.61)   | -0.04 (-0.10, 0.01)  | 0.147  | 152.71 (129.64, 180.91) | 86.57 (68.39, 108.92)   | -1.95 (-2.23, -1.66) | <0.001 | 1.92 (1.65, 2.25) | 0.86 (0.70, 1.05) | -2.79 (-3.29, -2.30) | <0.001 |
| Low-middle                   | 61.02 (37.69, 86.90)  | 62.86 (38.22, 89.94)  | 0.14 (-0.07, 0.36)   | 0.199  | 925.25 (649.65, 1242.00)  | 994.92 (697.72, 1338.15)  | 0.29 (0.14, 0.43)    | <0.001 | 361.57 (287.62, 452.25) | 214.71 (168.82, 264.29) | -1.73 (-2.20, -1.26) | <0.001 | 5.15 (3.94, 6.57) | 2.71 (2.08, 3.46) | -2.15 (-2.69, -1.60) | <0.001 |
| Low                          | 77.35 (46.62, 111.10) | 78.29 (46.03, 113.86) | 0.05 (0.01, 0.10)    | 0.018  | 1305.34 (921.45, 1751.70) | 1376.70 (974.99, 1838.34) | 0.20 (0.16, 0.23)    | <0.001 | 291.73 (213.60, 392.43) | 199.20 (154.42, 252.87) | -1.27 (-1.84, -0.68) | <0.001 | 3.73 (2.52, 5.25) | 2.16 (1.63, 2.77) | -1.82 (-2.38, -1.25) | <0.001 |
| <b>21 GBD region</b>         |                       |                       |                      |        |                           |                           |                      |        |                         |                         |                      |        |                   |                   |                      |        |
| South Asia                   | 64.53 (40.21, 91.31)  | 63.71 (39.19, 90.83)  | -0.01 (-0.27, 0.25)  | 0.915  | 911.87 (636.39, 1234.80)  | 939.84 (654.49, 1274.34)  | 0.15 (-0.03, 0.32)   | 0.100  | 482.20 (382.99, 593.89) | 291.37 (237.85, 350.43) | -1.74 (-2.15, -1.34) | <0.001 | 7.11 (5.51, 8.90) | 4.00 (3.25, 4.86) | -1.96 (-2.39, -1.52) | <0.001 |
| East Asia                    | 30.57 (17.11, 46.57)  | 25.55 (14.52, 38.61)  | -0.61 (-0.71, -0.52) | <0.001 | 593.59 (416.84, 794.89)   | 478.20 (339.50, 650.67)   | -0.74 (-0.77, -0.71) | <0.001 | 102.49 (81.32, 127.43)  | 37.91 (26.60, 52.50)    | -3.45 (-3.71, -3.19) | <0.001 | 1.20 (0.93, 1.49) | 0.24 (0.18, 0.30) | -5.49 (-5.82, -5.16) | <0.001 |
| North Africa and Middle East | 31.35 (19.05, 45.17)  | 33.08 (19.55, 47.86)  | 0.19 (0.15, 0.24)    | <0.001 | 515.87 (364.00, 697.88)   | 541.36 (376.09, 733.32)   | 0.16 (0.14, 0.19)    | <0.001 | 77.35 (53.47, 111.96)   | 45.24 (31.67, 63.47)    | -1.81 (-2.00, -1.63) | <0.001 | 0.85 (0.52, 1.36) | 0.31 (0.19, 0.48) | -3.42 (-3.66, -3.18) | <0.001 |

|                     |             |             |               |        |               |               |              |        |               |                |         |        |        |        |         |        |
|---------------------|-------------|-------------|---------------|--------|---------------|---------------|--------------|--------|---------------|----------------|---------|--------|--------|--------|---------|--------|
| Western             | 69.58       | 71.22       | 0.08 (0.06,   |        | 1257.59       | 1305.91       | 0.13 (0.12,  |        | 102.17        | 83.69 (54.04,  | -0.67   | 0.69   | 0.34   | -2.36  |         |        |
| Sub-Saharan Africa  | (40.92,     | (41.70,     | 0.09)         | <0.001 | (884.29,      | (928.15,      | 0.14)        | <0.001 | (67.53,       | 123.72)        | (-0.73, | <0.001 | (0.41, | (0.22, | (-2.58, | <0.001 |
|                     | 103.19)     | 106.16)     |               |        | 1682.41)      | 1755.87)      |              |        | 142.07)       |                | -0.62)  |        | 1.04)  | 0.51)  | -2.13)  |        |
|                     | 19.49       | 19.00       | -0.09 (-0.14, |        | 306.30        | 321.17        | 0.15 (0.05,  |        | 129.61        | 66.06 (49.26,  | -2.26   | 1.86   | 0.82   | -2.75  |         |        |
| Southeast Asia      | (12.01,     | (11.47,     | -0.05)        | <0.001 | (217.34,      | (229.91,      | 0.25)        | 0.002  | (98.83,       | 81.25)         | (-2.48, | <0.001 | (1.36, | (0.60, | (-3.00, | <0.001 |
|                     | 28.79)      | 27.66)      |               |        | 419.40)       | 438.61)       |              |        | 166.81)       |                | -2.04)  |        | 2.46)  | 1.03)  | -2.49)  |        |
|                     | 93.30       | 92.39       | -0.03 (-0.04, |        | 1731.77       | 1837.60       | 0.21 (0.18,  |        | 139.71        | 116.51 (78.70, | -0.62   | 0.93   | 0.47   | -2.32  |         |        |
| Eastern Sub-Saharan | (54.51,     | (53.33,     | -0.02)        | <0.001 | (1233.65,     | (1315.17,     | 0.24)        | <0.001 | (96.98,       | 168.59)        | (-0.75, | <0.001 | (0.64, | (0.35, | (-2.53, | <0.001 |
| Africa              | 136.98)     | 139.00)     |               |        | 2315.11)      | 2448.68)      |              |        | 194.27)       |                | -0.49)  |        | 1.28)  | 0.63)  | -2.12)  |        |
|                     | 24.29       | 26.24       | 0.28 (0.20,   |        | 443.24        | 474.58        | 0.24 (0.22,  |        | 62.75 (52.59, | 31.54 (21.24,  | -2.33   | 0.67   | 0.14   | -5.09  |         |        |
| Central Latin       | (14.77,     | (15.56,     | 0.35)         | <0.001 | (315.91,      | (337.17,      | 0.27)        | <0.001 | 76.36)        | 44.71)         | (-2.55, | <0.001 | (0.61, | (0.12, | (-5.34, | <0.001 |
| America             | 36.29)      | 38.82)      |               |        | 590.19)       | 629.92)       |              |        |               |                | -2.11)  |        | 0.75)  | 0.17)  | -4.84)  |        |
|                     | 68.19       | 67.37       | -0.04 (-0.07, |        | 1274.87       | 1267.62       | -0.02        |        | 133.06        | 83.47 (56.12,  | -1.59   | 1.17   | 0.37   | -3.87  |         |        |
| Tropical Latin      | (40.66,     | (39.73,     | -0.00)        | 0.041  | (897.70,      | (908.09,      | (-0.03,      | <0.001 | (104.45,      | 119.74)        | (-1.73, | <0.001 | (1.05, | (0.33, | (-4.23, | <0.001 |
| America             | 100.58)     | 99.59)      |               |        | 1695.53)      | 1671.78)      | -0.01)       |        | 168.84)       |                | -1.45)  |        | 1.31)  | 0.41)  | -3.50)  |        |
|                     | 91.68       | 92.75       | 0.04 (0.02,   |        | 1886.45       | 1894.25       | 0.01 (-0.01, |        | 127.62        | 116.15 (72.26, | -0.34   | 0.62   | 0.42   | -1.31  |         |        |
| Central Sub-Saharan | (51.07,     | (50.90,     | 0.07)         | 0.001  | (1378.06,     | (1336.77,     | 0.04)        | 0.263  | (83.00,       | 182.16)        | (-0.37, | <0.001 | (0.33, | (0.16, | (-1.40, | <0.001 |
| Africa              | 136.37)     | 142.10)     |               |        | 2543.25)      | 2540.52)      |              |        | 187.77)       |                | -0.30)  |        | 1.10)  | 1.04)  | -1.22)  |        |
|                     | 0.44 (0.15, | 0.28 (0.07, | -1.68 (-1.79, |        | 8.40 (6.12,   | 6.42 (4.59,   | -0.94        |        | 14.17 (12.79, | 4.86 (4.28,    | -3.74   | 0.22   | 0.07   | -3.88  |         |        |
| Western Europe      | 0.89)       | 0.63)       | -1.56)        | <0.001 | 11.45)        | 8.96)         | (-1.13,      | <0.001 | 15.61)        | 5.45)          | (-4.21, | <0.001 | (0.20, | (0.06, | (-4.37, | <0.001 |
|                     |             |             |               |        |               |               | -0.76)       |        |               |                | -3.28)  |        | 0.24)  | 0.08)  | -3.40)  |        |
|                     | 1.22 (0.48, | 0.79 (0.40, | -1.47 (-1.52, |        | 23.45 (17.23, | 16.71 (14.17, | -1.15        |        | 13.19 (12.00, | 6.18 (5.26,    | -2.53   | 0.19   | 0.08   | -2.80  |         |        |
| High-income North   | 2.34)       | 1.29)       | -1.42)        | <0.001 | 31.53)        | 19.84)        | (-1.18,      | <0.001 | 14.53)        | 7.16)          | (-3.14, | <0.001 | (0.18, | (0.07, | (-3.54, | <0.001 |
| America             |             |             |               |        |               |               | -1.12)       |        |               |                | -1.92)  |        | 0.21)  | 0.10)  | -2.06)  |        |
|                     | 46.07       | 49.22       | 0.23 (0.20,   |        | 817.80        | 894.50        | 0.31 (0.29,  |        | 273.08        | 128.88         | -2.50   | 3.80   | 1.39   | -3.34  |         |        |
| Central Asia        | (28.07,     | (29.14,     | 0.26)         | <0.001 | (577.35,      | (632.45,      | 0.33)        | <0.001 | (244.11,      | (101.56,       | (-3.36, | <0.001 | (3.44, | (1.10, | (-4.27, | <0.001 |
|                     | 67.79)      | 71.80)      |               |        | 1097.01)      | 1194.06)      |              |        | 304.88)       | 163.28)        | -1.62)  |        | 4.16)  | 1.75)  | -2.40)  |        |
|                     | 3.66 (2.06, | 2.29 (1.26, | -1.56 (-1.87, |        | 37.63 (29.51, | 28.79 (22.69, | -0.89        |        | 78.12 (66.86, | 18.88 (15.17,  | -4.70   | 1.24   | 0.28   | -4.87  |         |        |
| Eastern Europe      | 5.44)       | 3.52)       | -1.25)        | <0.001 | 46.80)        | 35.94)        | (-1.02,      | <0.001 | 89.31)        | 23.33)         | (-6.16, | <0.001 | (1.05, | (0.23, | (-6.39, | <0.001 |
|                     |             |             |               |        |               |               | -0.76)       |        |               |                | -3.22)  |        | 1.42)  | 0.36)  | -3.33)  |        |
|                     | 86.24       | 86.72       | 0.02 (0.01,   |        | 1656.58       | 1688.98       | 0.07 (0.06,  |        | 177.16        | 142.82         | -0.75   | 1.60   | 1.01   | -1.61  |         |        |
| Southern            | (50.77,     | (50.44,     | 0.03)         | 0.002  | (1186.80,     | (1208.81,     | 0.07)        | <0.001 | (127.66,      | (100.14,       | (-0.90, | <0.001 | (1.15, | (0.71, | (-2.07, | <0.001 |
| Sub-Saharan Africa  | 127.64)     | 128.65)     |               |        | 2209.49)      | 2248.98)      |              |        | 237.60)       | 195.75)        | -0.61)  |        | 2.24)  | 1.44)  | -1.14)  |        |

|                          |             |             |               |          |               |               |              |          |               |                |         |        |         |         |        |
|--------------------------|-------------|-------------|---------------|----------|---------------|---------------|--------------|----------|---------------|----------------|---------|--------|---------|---------|--------|
| High-income Asia Pacific | 0.40 (0.12, | 0.20 (0.05, | -2.34 (-2.48, | <0.001   | 12.83 (9.76,  | 9.58 (7.33,   | -1.04        | <0.001   | 10.61 (9.11,  | 3.44 (2.82,    | -3.82   | 0.16   | 0.05    | -4.15   | <0.001 |
|                          | 0.86)       | 0.48)       | -2.21)        |          | 16.74)        | 12.42)        | (-1.18,      |          | 12.22)        | 4.04)          | (-4.18, | (0.14, | (0.04,  | (-4.68, |        |
| Central Europe           | 3.74 (2.49, | 2.50 (1.59, | -1.42 (-1.78, | <0.001   | 51.79 (39.83, | 41.98 (32.00, | -0.79        | <0.001   | 67.72 (62.48, | 12.55 (10.75,  | -5.64   | 1.06   | 0.17    | -6.09   | <0.001 |
|                          | 5.14)       | 3.56)       | -1.07)        |          | 65.09)        | 53.11)        | (-1.12,      |          | 73.49)        | 14.48)         | (-6.18, | (0.97, | (0.14,  | (-6.66, |        |
| Andean Latin America     | 60.46       | 60.25       | -0.02 (-0.05, | 0.079    | 1125.99       | 1129.22       | 0.00 (-0.02, | 0.746    | 104.32        | 71.77 (47.05,  | -1.28   | 0.82   | 0.29    | -3.50   | <0.001 |
|                          | (33.66,     | (35.92,     | 0.00)         |          | (786.75,      | (809.79,      | 0.03)        |          | (74.64,       | 105.34)        | (-1.51, | (0.57, | (0.19,  | (-3.98, |        |
| Caribbean                | 90.79)      | 89.82)      |               | 1530.02) | 1520.97)      |               | 143.49)      | 143.49)  | 105.34)       | -1.06)         | 1.20)   | 0.42)  | -3.02)  |         |        |
|                          | 57.42       | 61.67       | 0.25 (0.22,   | <0.001   | 1082.10       | 1123.99       | 0.13 (0.12,  | <0.001   | 157.53        | 115.92 (76.52, | -1.04   | 1.72   | 1.01    | -1.80   | <0.001 |
| (33.75,                  | (36.10,     | 0.28)       | (763.62,      |          | (789.35,      | 0.14)         | (118.67,     |          | 173.43)       | (-1.21,        | (1.30,  | (0.56, | (-2.10, |         |        |
| Southern Latin America   | 84.88)      | 89.84)      |               | 1455.48) | 1499.31)      |               | 204.73)      | 204.73)  | 173.43)       | -0.86)         | 2.28)   | 1.83)  | -1.50)  |         |        |
|                          | 31.82       | 34.00       | 0.22 (0.14,   | <0.001   | 606.43        | 660.29        | 0.29 (0.22,  | <0.001   | 72.11 (57.15, | 41.10 (26.21,  | -1.92   | 0.70   | 0.15    | -5.07   | <0.001 |
| (18.27,                  | (19.87,     | 0.31)       | (428.00,      |          | (464.07,      | 0.36)         | 91.92)       |          | 61.38)        | (-2.06,        | (0.59,  | (0.12, | (-5.55, |         |        |
| Oceania                  | 46.93)      | 51.29)      |               | 809.47)  | 882.56)       |               | 809.47)      | 882.56)  | 61.38)        | -1.78)         | 0.84)   | 0.20)  | -4.58)  |         |        |
|                          | 38.13       | 40.24       | 0.19 (0.18,   | <0.001   | 642.96        | 694.80        | 0.28 (0.24,  | <0.001   | 503.09        | 448.43         | -0.44   | 7.66   | 6.73    | -0.49   | <0.001 |
| (23.60,                  | (25.03,     | 0.20)       | (454.03,      |          | (485.07,      | 0.31)         | (241.40,     |          | (198.60,      | (-0.54,        | (3.52,  | (2.80, | (-0.60, |         |        |
| Australasia              | 55.64)      | 58.98)      |               | 890.83)  | 970.19)       |               | 963.84)      | 963.84)  | 862.91)       | -0.34)         | 15.13)  | 13.51) | -0.39)  |         |        |
|                          | 0.57 (0.14, | 0.43 (0.08, | -0.92 (-1.12, | <0.001   | 18.34 (12.78, | 17.32 (11.77, | -0.16        | 0.018    | 33.93 (27.94, | 14.64 (11.26,  | -2.73   | 0.53   | 0.22    | -2.84   | <0.001 |
| 1.25)                    | 1.05)       | -0.71)      | 25.54)        |          | 23.98)        | (-0.29,       | 41.65)       |          | 18.74)        | (-3.60,        | (0.44,  | (0.17, | (-3.74, |         |        |
| 30-34 years Women        |             |             |               |          |               |               |              |          |               |                |         |        |         |         |        |
|                          |             |             |               |          |               |               |              |          |               |                |         |        |         |         |        |
| Global                   | 32.50       | 36.96       | 0.45 (0.38,   | <0.001   | 736.08        | 875.46        | 0.61 (0.56,  | <0.001   | 231.45        | 128.57         | -2.01   | 3.47   | 1.54    | -2.77   | <0.001 |
|                          | (22.42,     | (25.01,     | 0.52)         |          | (556.22,      | (652.45,      | 0.66)        |          | (192.39,      | (101.90,       | (-2.40, | (2.85, | (1.16,  | (-3.23, |        |
| SDI category             | 43.21)      | 49.60)      |               | 963.60)  | 1150.49)      |               | 963.60)      | 1150.49) | 158.66)       | -1.62)         | 4.09)   | 1.95)  | -2.30)  |         |        |
|                          |             |             |               |          |               |               |              |          |               |                |         |        |         |         |        |
| High                     | 1.99 (1.26, | 1.77 (1.26, | -0.40 (-0.51, | <0.001   | 27.35 (20.52, | 27.95 (23.60, | 0.06 (-0.04, | 0.254    | 22.84 (20.94, | 9.11 (7.85,    | -3.08   | 0.37   | 0.13    | -3.50   | <0.001 |
|                          | 2.82)       | 2.31)       | -0.29)        |          | 35.75)        | 33.28)        | 0.15)        |          | 25.01)        | 10.94)         | (-3.50, | (0.34, | (0.11,  | (-3.95, |        |
| High-middle              |             |             |               |          |               |               |              |          |               |                |         |        |         |         |        |
|                          | 15.22       | 15.16       | 0.00 (-0.09,  | 0.919    | 351.02        | 387.88        | 0.36 (0.30,  | <0.001   | 115.16        | 38.56 (30.18,  | -3.72   | 1.74   | 0.35    | -5.38   | <0.001 |
| (11.03,                  | (10.63,     | 0.10)       | (267.72,      |          | (289.09,      | 0.43)         | (98.70,      |          | 49.88)        | (-4.13,        | (1.50,  | (0.29, | (-6.30, |         |        |
|                          | 20.16)      | 20.41)      |               | 463.55)  | 515.51)       |               | 133.43)      | 133.43)  | 49.88)        | -3.31)         | 2.03)   | 0.43)  | -4.46)  |         |        |
| 128                      |             |             |               |          |               |               |              |          |               |                |         |        |         |         |        |



|                      |         |         |               |        |           |           |              |        |          |                |         |        |        |        |          |        |
|----------------------|---------|---------|---------------|--------|-----------|-----------|--------------|--------|----------|----------------|---------|--------|--------|--------|----------|--------|
|                      | 34.27   | 33.95   |               |        | 845.75    | 865.25    |              |        | 253.82   |                | -3.43   |        | 3.77   | 0.90   | -4.77    |        |
| Middle               | (22.88, | (22.93, | -0.03 (-0.14, | 0.641  | (631.11,  | (644.54,  | 0.08 (0.00,  | 0.043  | (217.48, | 92.48 (73.72,  | (-3.99, | <0.001 | (3.24, | (0.74, | (-5.82,  | <0.001 |
|                      | 46.72)  | 46.46)  | 0.09)         |        | 1110.99)  | 1138.33)  | 0.16)        |        | 295.48)  | 116.72)        | -2.86)  |        | 4.40)  | 1.09)  | -3.71)   |        |
|                      | 62.80   | 60.51   |               |        | 1338.04   | 1360.63   |              |        | 446.23   | 256.68         | -1.87   |        | 6.76   | 3.40   | -2.34    |        |
| Low-middle           | (42.77, | (40.64, | -0.10 (-0.25, | 0.182  | (990.27,  | (1001.57, | 0.04 (-0.08, | 0.514  | (329.49, | (186.64,       | (-2.22, | <0.001 | (4.74, | (2.27, | (-2.65,  | <0.001 |
|                      | 82.20)  | 80.64)  | 0.05)         |        | 1733.75)  | 1782.10)  | 0.17)        |        | 553.71)  | 332.68)        | -1.52)  |        | 8.68)  | 4.71)  | -2.02)   |        |
|                      | 69.76   | 70.16   |               |        | 1526.26   | 1595.03   |              |        | 424.72   | 248.59         | -1.85   |        | 6.23   | 3.06   | -2.45    |        |
| Low                  | (47.28, | (46.48, | 0.02 (0.01,   | <0.001 | (1124.75, | (1186.05, | 0.15 (0.14,  | <0.001 | (302.86, | (184.44,       | (-2.23, | <0.001 | (4.21, | (2.06, | (-2.92,  | <0.001 |
|                      | 93.31)  | 93.65)  | 0.03)         |        | 2006.45)  | 2089.04)  | 0.17)        |        | 555.61)  | 325.16)        | -1.47)  |        | 8.53)  | 4.25)  | -1.98)   |        |
| <b>21 GBD region</b> |         |         |               |        |           |           |              |        |          |                |         |        |        |        |          |        |
|                      | 68.07   | 63.41   |               |        | 1405.26   | 1379.70   | -0.07        |        | 560.25   | 330.83         | -1.80   |        | 8.72   | 4.69   | -2.14    |        |
| South Asia           | (47.41, | (43.10, | -0.25 (-0.34, | <0.001 | (1027.59, | (1002.42, | (-0.21,      | 0.327  | (411.48, | (244.53,       | (-2.27, | <0.001 | (6.15, | (3.24, | (-2.69,  | <0.001 |
|                      | 89.78)  | 83.89)  | -0.16)        |        | 1827.34)  | 1810.73)  | 0.07)        |        | 702.18)  | 434.97)        | -1.33)  |        | 11.21) | 6.42)  | -1.58)   |        |
|                      | 25.74   | 22.65   |               |        | 635.27    | 573.43    | -0.35        |        | 253.23   |                | -5.61   |        | 3.93   | 0.35   | -8.38    |        |
| East Asia            | (16.95, | (14.94, | -0.42 (-0.55, | <0.001 | (469.76,  | (421.58,  | (-0.43,      | <0.001 | (201.00, | 48.09 (35.48,  | (-6.43, | <0.001 | (3.05, | (0.26, | (-10.04, | <0.001 |
|                      | 35.46)  | 31.12)  | -0.29)        |        | 833.52)   | 755.95)   | -0.28)       |        | 319.85)  | 64.49)         | -4.79)  |        | 5.01)  | 0.47)  | -6.68)   |        |
|                      | 27.41   | 28.25   |               |        | 615.21    | 649.60    |              |        | 158.92   |                | -2.80   |        | 2.29   | 0.69   | -4.03    |        |
| North Africa and     | (18.35, | (18.96, | 0.09 (0.05,   | <0.001 | (454.04,  | (472.98,  | 0.20 (0.17,  | <0.001 | (112.23, | 69.77 (52.26,  | (-2.94, | <0.001 | (1.53, | (0.47, | (-4.19,  | <0.001 |
| Middle East          | 36.62)  | 37.79)  | 0.14)         |        | 813.86)   | 862.07)   | 0.23)        |        | 199.89)  | 90.79)         | -2.66)  |        | 2.97)  | 0.95)  | -3.87)   |        |
|                      | 59.31   | 60.83   |               |        | 1312.41   | 1394.39   |              |        | 159.02   |                | -1.66   |        | 1.72   | 0.57   | -3.73    |        |
| Western              | (39.15, | (39.59, | 0.08 (0.05,   | <0.001 | (968.88,  | (1018.05, | 0.21 (0.20,  | <0.001 | (110.52, | 97.91 (66.83,  | (-1.72, | <0.001 | (1.07, | (0.38, | (-3.81,  | <0.001 |
| Sub-Saharan Africa   | 80.86)  | 82.87)  | 0.11)         |        | 1753.46)  | 1847.40)  | 0.22)        |        | 212.33)  | 136.71)        | -1.60)  |        | 2.40)  | 0.83)  | -3.66)   |        |
|                      | 22.36   | 20.65   |               |        | 466.98    | 468.84    |              |        | 127.74   |                | -1.76   |        | 1.86   | 0.94   | -2.28    |        |
| Southeast Asia       | (15.43, | (14.10, | -0.27 (-0.31, | <0.001 | (347.62,  | (350.69,  | 0.01 (-0.02, | 0.455  | (102.53, | 75.80 (59.90,  | (-1.91, | <0.001 | (1.45, | (0.74, | (-2.53,  | <0.001 |
|                      | 29.91)  | 27.85)  | -0.23)        |        | 613.07)   | 621.01)   | 0.05)        |        | 152.28)  | 92.95)         | -1.62)  |        | 2.30)  | 1.17)  | -2.03)   |        |
|                      | 80.71   | 81.32   |               |        | 1913.64   | 2036.79   |              |        | 226.26   |                | -1.61   |        | 2.42   | 0.80   | -3.70    |        |
| Eastern Sub-Saharan  | (52.55, | (52.31, | 0.02 (-0.01,  | 0.255  | (1414.11, | (1502.10, | 0.22 (0.20,  | <0.001 | (147.91, | 141.13 (97.76, | (-1.66, | <0.001 | (1.23, | (0.56, | (-3.92,  | <0.001 |
| Africa               | 111.30) | 112.69) | 0.04)         |        | 2537.19)  | 2672.08)  | 0.23)        |        | 306.15)  | 197.87)        | -1.56)  |        | 3.53)  | 1.08)  | -3.48)   |        |
|                      | 21.93   | 21.95   |               |        | 599.04    | 620.98    |              |        | 120.32   |                | -3.57   |        | 1.63   | 0.21   | -6.69    |        |
| Central Latin        | (15.02, | (14.75, | 0.01 (-0.02,  | 0.575  | (455.24,  | (468.65,  | 0.14 (0.09,  | <0.001 | (106.25, | 41.57 (28.99,  | (-3.78, | <0.001 | (1.51, | (0.17, | (-7.05,  | <0.001 |
| America              | 29.65)  | 29.98)  | 0.04)         |        | 770.21)   | 801.18)   | 0.19)        |        | 136.46)  | 58.10)         | -3.36)  |        | 1.74)  | 0.27)  | -6.33)   |        |
|                      | 53.91   | 53.86   |               |        | 1611.77   | 1655.52   |              |        | 186.94   |                | -1.76   |        | 1.97   | 0.59   | -4.08    |        |
| Tropical Latin       | (35.14, | (35.19, | -0.00 (-0.03, | 0.863  | (1204.09, | (1225.67, | 0.10 (0.08,  | <0.001 | (151.81, | 111.53 (79.10, | (-1.95, | <0.001 | (1.81, | (0.53, | (-4.58,  | <0.001 |
| America              | 35.14,  | 35.19,  | 0.02)         |        | 1204.09,  | 1225.67,  | 0.11)        |        | 151.81,  | 155.37)        | (-1.95, |        | 1.81,  | 0.53,  | (-4.58,  | <0.001 |

|                             |                   |                   |                      |        |                      |                      |                      |        |                       |                       |                      |              |              |                |
|-----------------------------|-------------------|-------------------|----------------------|--------|----------------------|----------------------|----------------------|--------|-----------------------|-----------------------|----------------------|--------------|--------------|----------------|
|                             | 74.48)            | 75.26)            |                      |        | 2092.92)             | 2164.25)             |                      |        | 228.34)               |                       | -1.57)               | 2.12)        | 0.66)        | -3.58)         |
| Central Sub-Saharan Africa  | 75.95             | 76.53             | 0.03 (0.01, 0.05)    | 0.001  | 1897.52              | 1938.08              | 0.08 (0.06, 0.10)    | <0.001 | 261.88                | 155.09                | -1.79                | 3.06         | 1.14         | -3.37          |
|                             | (48.21, 105.47)   | (47.11, 104.91)   |                      |        | (1387.81, 2517.08)   | (1429.32, 2524.10)   |                      |        | (168.70, 389.85)      | (104.11, 222.27)      | (-1.88, -1.71)       | (1.54, 5.21) | (0.61, 2.11) | (-3.45, -3.29) |
| Western Europe              | 0.80 (0.45, 1.25) | 0.44 (0.20, 0.79) | -2.02 (-2.38, -1.66) | <0.001 | 10.80 (7.92, 14.88)  | 8.02 (5.72, 11.28)   | -1.04 (-1.17, -0.91) | <0.001 | 16.40 (15.10, 17.75)  | 5.29 (4.74, 5.94)     | -3.83 (-4.10, -3.55) | 0.28         | 0.08         | -4.05          |
|                             |                   |                   |                      |        |                      |                      |                      |        |                       |                       |                      | (0.26, 0.30) | (0.08, 0.09) | (-4.37, -3.73) |
| High-income North America   | 2.95 (1.73, 4.35) | 2.02 (1.36, 2.69) | -1.27 (-1.37, -1.17) | <0.001 | 42.22 (29.67, 57.55) | 32.31 (26.79, 38.34) | -0.93 (-0.99, -0.87) | <0.001 | 23.88 (22.12, 25.92)  | 10.15 (8.98, 11.60)   | -2.90 (-3.49, -2.29) | 0.38         | 0.14         | -3.32          |
|                             |                   |                   |                      |        |                      |                      |                      |        |                       |                       |                      | (0.35, 0.40) | (0.13, 0.16) | (-4.03, -2.60) |
| Central Asia                | 36.75             | 37.72             | 0.09 (0.06, 0.12)    | <0.001 | 947.47               | 1021.84              | 0.27 (0.24, 0.29)    | <0.001 | 415.56                | 174.47                | -2.91                | 6.54         | 2.22         | -3.62          |
|                             | (25.15, 49.81)    | (25.06, 51.34)    |                      |        | (704.01, 1236.20)    | (766.81, 1337.68)    |                      |        | (380.67, 451.81)      | (139.87, 215.23)      | (-3.39, -2.43)       | (6.03, 7.05) | (1.77, 2.78) | (-4.15, -3.09) |
| Eastern Europe              | 6.57 (4.79, 8.50) | 3.81 (2.66, 5.12) | -1.81 (-1.93, -1.70) | <0.001 | 48.68 (37.71, 61.20) | 39.05 (30.53, 49.12) | -0.73 (-0.86, -0.60) | <0.001 | 67.65 (57.75, 74.15)  | 13.71 (10.68, 17.30)  | -5.33 (-6.32, -4.32) | 1.15         | 0.21         | -5.64          |
|                             |                   |                   |                      |        |                      |                      |                      |        |                       |                       |                      | (0.98, 1.27) | (0.16, 0.27) | (-7.16, -4.10) |
| Southern Sub-Saharan Africa | 74.72             | 75.11             | 0.02 (0.00, 0.03)    | 0.009  | 1836.93              | 1867.02              | 0.06 (0.04, 0.07)    | <0.001 | 353.43                | 161.78                | -2.59                | 4.71         | 1.32         | -4.30          |
|                             | (48.22, 102.03)   | (48.83, 103.33)   |                      |        | (1361.41, 2430.13)   | (1353.54, 2457.69)   |                      |        | (254.18, 456.24)      | (114.59, 217.66)      | (-3.66, -1.49)       | (2.97, 6.28) | (0.77, 1.99) | (-5.91, -2.67) |
| High-income Asia Pacific    | 0.76 (0.39, 1.27) | 0.36 (0.16, 0.64) | -2.59 (-2.68, -2.50) | <0.001 | 14.02 (10.31, 18.89) | 9.90 (7.55, 13.16)   | -1.21 (-1.28, -1.15) | <0.001 | 15.13 (12.96, 17.73)  | 4.00 (3.45, 4.64)     | -4.48 (-4.80, -4.16) | 0.25         | 0.06         | -4.86          |
|                             |                   |                   |                      |        |                      |                      |                      |        |                       |                       |                      | (0.21, 0.30) | (0.05, 0.07) | (-5.23, -4.48) |
| Central Europe              | 3.72 (2.87, 4.70) | 2.30 (1.63, 3.12) | -1.68 (-1.80, -1.56) | <0.001 | 51.46 (41.07, 63.86) | 39.41 (30.97, 48.86) | -0.97 (-1.23, -0.71) | <0.001 | 78.62 (72.67, 85.04)  | 12.00 (9.96, 14.39)   | -6.30 (-6.58, -6.01) | 1.34         | 0.18         | -6.77          |
|                             |                   |                   |                      |        |                      |                      |                      |        |                       |                       |                      | (1.24, 1.45) | (0.14, 0.22) | (-7.08, -6.46) |
| Andean Latin America        | 50.87             | 50.11             | -0.05 (-0.06, -0.05) | <0.001 | 1367.79              | 1408.25              | 0.10 (0.07, 0.12)    | <0.001 | 154.55                | 89.12 (59.08, 126.77) | -1.89                | 1.59         | 0.40         | -4.69          |
|                             | (33.18, 70.25)    | (32.31, 69.77)    |                      |        | (1012.32, 1787.13)   | (1032.36, 1834.69)   |                      |        | (116.86, 202.38)      |                       | (-2.25, -1.52)       | (1.18, 2.17) | (0.26, 0.59) | (-5.73, -3.65) |
| Caribbean                   | 47.79             | 52.89             | 0.36 (0.32, 0.39)    | <0.001 | 1293.42              | 1392.25              | 0.26 (0.24, 0.27)    | <0.001 | 393.26                | 238.50                | -1.67                | 5.86         | 3.05         | -2.20          |
|                             | (31.43, 65.88)    | (34.17, 72.25)    |                      |        | (946.94, 1692.27)    | (1025.56, 1815.91)   |                      |        | (261.40, 563.63)      | (149.24, 383.29)      | (-1.76, -1.58)       | (3.47, 8.83) | (1.56, 5.46) | (-2.31, -2.08) |
| Southern Latin America      | 25.46             | 25.94             | 0.07 (-0.01, 0.14)   | 0.093  | 724.04               | 792.16               | 0.32 (0.26, 0.38)    | <0.001 | 98.09 (81.02, 119.90) | 50.60 (34.72, 72.18)  | -2.23                | 1.13         | 0.23         | -5.23          |
|                             | (17.25, 17.25)    | (17.32, 17.32)    |                      |        | (542.16, 542.16)     | (596.73, 596.73)     |                      |        |                       |                       | (-2.48, -2.48)       | (0.97, 0.97) | (0.19, 0.19) | (-5.74, -5.74) |



|                              |             |             |               |        |               |               |              |        |               |                |         |        |        |        |         |        |
|------------------------------|-------------|-------------|---------------|--------|---------------|---------------|--------------|--------|---------------|----------------|---------|--------|--------|--------|---------|--------|
|                              | 36.48)      | 30.85)      |               |        | 768.08)       | 660.21)       | -0.48)       |        | 169.42)       | -3.33)         | 2.42)   | 0.49)  | -4.86) |        |         |        |
| North Africa and Middle East | 25.97       | 26.63       |               |        | 527.13        | 552.09        |              |        |               | -1.90          | 1.04    | 0.38   | -3.39  |        |         |        |
|                              | (17.55,     | (17.66,     | 0.10 (0.02,   | 0.009  | (386.81,      | (405.87,      | 0.17 (0.12,  | <0.001 | 84.14 (58.91, | 48.14 (34.36,  | (-2.00, | <0.001 | (0.64, | (0.24, | (-3.51, | <0.001 |
|                              | 35.14)      | 35.48)      | 0.17)         |        | 705.38)       | 740.84)       | 0.22)        |        | 119.80)       | 66.33)         | -1.79)  |        | 1.60)  | 0.56)  | -3.26)  |        |
| Western Sub-Saharan Africa   | 57.43       | 58.23       |               |        | 1240.75       | 1284.11       |              |        | 119.41        |                | -0.91   | 1.07   | 0.53   | -2.40  |         |        |
|                              | (37.89,     | (38.54,     | 0.05 (0.03,   | <0.001 | (915.20,      | (944.87,      | 0.12 (0.11,  | <0.001 | (81.67,       | 91.15 (60.51,  | (-0.99, | <0.001 | (0.65, | (0.35, | (-2.57, | <0.001 |
|                              | 78.10)      | 80.04)      | 0.06)         |        | 1658.93)      | 1715.75)      | 0.13)        |        | 165.14)       | 132.56)        | -0.83)  |        | 1.61)  | 0.80)  | -2.23)  |        |
| Southeast Asia               | 17.99       | 16.95       |               |        | 311.98        | 319.53        |              |        | 126.06        |                | -2.63   | 1.96   | 0.75   | -3.25  |         |        |
|                              | (12.61,     | (11.63,     | -0.19 (-0.26, | <0.001 | (231.29,      | (237.33,      | 0.08 (0.05,  | <0.001 | (96.12,       | 57.87 (45.55,  | (-2.82, | <0.001 | (1.47, | (0.57, | (-3.45, | <0.001 |
|                              | 23.83)      | 22.47)      | -0.12)        |        | 425.24)       | 428.78)       | 0.11)        |        | 162.11)       | 71.82)         | -2.45)  |        | 2.57)  | 0.94)  | -3.05)  |        |
| Eastern Sub-Saharan Africa   | 75.15       | 73.83       |               |        | 1679.62       | 1751.40       |              |        | 125.37        |                | -0.58   | 0.81   | 0.40   | -2.42  |         |        |
|                              | (49.10,     | (47.41,     | -0.06 (-0.08, | <0.001 | (1242.18,     | (1291.26,     | 0.15 (0.13,  | <0.001 | (85.81,       | 105.70 (68.99, | (-0.68, | <0.001 | (0.55, | (0.30, | (-2.62, | <0.001 |
|                              | 102.31)     | 102.16)     | -0.04)        |        | 2210.47)      | 2325.19)      | 0.17)        |        | 175.29)       | 157.81)        | -0.48)  |        | 1.15)  | 0.54)  | -2.21)  |        |
| Central Latin America        | 19.84       | 20.14       |               |        | 443.89        | 454.75        |              |        |               |                | -2.85   | 0.95   | 0.19   | -5.40  |         |        |
|                              | (13.44,     | (13.41,     | 0.06 (0.01,   | 0.024  | (328.36,      | (336.99,      | 0.09 (0.04,  | 0.001  | 74.99 (63.76, | 32.22 (22.37,  | (-3.05, | <0.001 | (0.86, | (0.15, | (-5.84, | <0.001 |
|                              | 27.24)      | 27.22)      | 0.11)         |        | 586.67)       | 602.06)       | 0.15)        |        | 87.91)        | 45.18)         | -2.63)  |        | 1.05)  | 0.22)  | -4.95)  |        |
| Tropical Latin America       | 53.96       | 53.01       |               |        | 1264.28       | 1258.62       | -0.02        |        | 138.08        |                | -1.69   | 1.38   | 0.43   | -3.88  |         |        |
|                              | (35.54,     | (34.67,     | -0.06 (-0.08, | <0.001 | (925.39,      | (928.20,      | (-0.02,      | <0.001 | (110.27,      | 84.50 (57.84,  | (-1.83, | <0.001 | (1.25, | (0.38, | (-4.34, | <0.001 |
|                              | 74.09)      | 72.03)      | -0.04)        |        | 1673.49)      | 1670.06)      | -0.01)       |        | 174.63)       | 119.90)        | -1.54)  |        | 1.52)  | 0.50)  | -3.42)  |        |
| Central Sub-Saharan Africa   | 74.40       | 74.77       |               |        | 1804.37       | 1805.78       |              |        | 117.54        |                | -0.30   | 0.57   | 0.39   | -1.29  |         |        |
|                              | (47.45,     | (46.59,     | 0.02 (0.01,   | <0.001 | (1336.43,     | (1331.23,     | 0.01 (-0.02, | 0.658  | (76.11,       | 107.84 (66.32, | (-0.33, | <0.001 | (0.30, | (0.16, | (-1.52, | <0.001 |
|                              | 102.22)     | 105.19)     | 0.02)         |        | 2403.32)      | 2406.06)      | 0.04)        |        | 170.14)       | 164.72)        | -0.26)  |        | 1.01)  | 0.96)  | -1.06)  |        |
| Western Europe               | 0.81 (0.47, | 0.51 (0.25, | -1.61 (-1.72, | <0.001 | 9.69 (6.88,   | 7.22 (4.99,   | -1.03        |        | 18.36 (16.71, | 6.43 (5.62,    | -3.59   |        | 0.31   | 0.11   | -3.71   |        |
|                              | 1.28)       | 0.85)       | -1.51)        |        | 13.64)        | 10.65)        | (-1.18,      | <0.001 | 20.28)        | 7.33)          | (-4.22, | <0.001 | (0.29, | (0.09, | (-4.37, | <0.001 |
|                              |             |             |               |        |               |               | -0.88)       |        |               |                | -2.96)  |        | 0.35)  | 0.12)  | -3.06)  |        |
| High-income North America    | 1.99 (1.10, | 1.38 (0.95, | -1.23 (-1.29, | <0.001 | 29.84 (21.41, | 21.30 (17.70, | -1.14        |        | 20.31 (18.71, | 8.31 (6.92,    | -3.01   |        | 0.33   | 0.12   | -3.30   |        |
|                              | 3.06)       | 1.83)       | -1.17)        |        | 40.73)        | 25.74)        | (-1.17,      | <0.001 | 21.97)        | 9.58)          | (-3.98, | <0.001 | (0.30, | (0.10, | (-4.46, | <0.001 |
|                              |             |             |               |        |               |               | -1.10)       |        |               |                | -2.03)  |        | 0.36)  | 0.14)  | -2.13)  |        |
| Central Asia                 | 38.13       | 39.61       |               |        | 811.78        | 890.31        |              |        | 327.32        | 147.63         | -2.71   |        | 5.09   | 1.85   | -3.46   |        |
|                              | (26.36,     | (26.71,     | 0.13 (0.09,   | <0.001 | (595.87,      | (654.39,      | 0.32 (0.30,  | <0.001 | (292.48,      | (117.28,       | (-3.19, | <0.001 | (4.59, | (1.44, | (-3.99, | <0.001 |
|                              | 51.32)      | 54.10)      | 0.17)         |        | 1076.46)      | 1174.01)      | 0.34)        |        | 364.81)       | 187.31)        | -2.22)  |        | 5.58)  | 2.30)  | -2.92)  |        |
| Eastern Europe               | 8.69 (6.57, | 4.14 (3.01, | -2.53 (-2.65, | <0.001 | 52.59 (40.80, | 36.88 (28.64, | -1.21        |        | 125.00        | 26.31 (21.30,  | -5.17   |        | 2.16   | 0.43   | -5.39   |        |
|                              | 10.92)      | 5.43)       | -2.41)        |        | 65.84)        | 46.70)        | (-1.40,      | <0.001 | (104.75,      | 33.05)         | (-6.10, | <0.001 | (1.82, | (0.35, | (-6.48, | <0.001 |











|                     |             |              |               |        |               |               |             |        |               |                |         |        |        |        |         |        |
|---------------------|-------------|--------------|---------------|--------|---------------|---------------|-------------|--------|---------------|----------------|---------|--------|--------|--------|---------|--------|
|                     | 34.90       | 33.97        | -0.09 (-0.14, |        | 910.79        | 929.73        | 0.11 (0.02, |        | 611.36        | 360.55         | -1.66   | 10.99  | 6.11   | -1.87  |         |        |
| South Asia          | (22.99,     | (22.30,      | -0.04)        | <0.001 | (695.05,      | (711.22,      | 0.20)       | 0.018  | (453.87,      | (279.36,       | (-2.40, | <0.001 | (7.96, | (4.61, | (-2.67, | <0.001 |
|                     | 51.24)      | 49.68)       |               |        | 1191.25)      | 1211.63)      |             |        | 816.54)       | 463.92)        | (-0.91) |        | 15.04) | 8.00)  | (-1.06) |        |
|                     | 23.95       | 19.50        | -0.76 (-1.06, |        | 582.22        | 479.86        | -0.70       |        | 208.58        | 57.20 (43.18,  | -4.47   |        | 3.49   | 0.65   | -5.69   |        |
| East Asia           | (14.59,     | (12.21,      | -0.47)        | <0.001 | (445.88,      | (371.65,      | (-0.88,     | <0.001 | (166.08,      | 73.65)         | (-4.80, | <0.001 | (2.72, | (0.49, | (-6.17, | <0.001 |
|                     | 34.91)      | 28.48)       |               |        | 750.68)       | 621.74)       | (-0.52)     |        | 256.19)       |                | (-4.14) |        | 4.34)  | 0.85)  | (-5.20) |        |
|                     | 21.60       | 20.99        | -0.09 (-0.16, |        | 533.41        | 543.49        |             |        | 110.23        | 55.71 (40.51,  | -2.33   |        | 1.64   | 0.57   | -3.57   |        |
| North Africa and    | (13.45,     | (13.01,      | -0.02)        | 0.011  | (410.80,      | (418.84,      | 0.10)       | <0.001 | (77.66,       | 75.86)         | (-2.42, | <0.001 | (1.04, | (0.38, | (-3.68, | <0.001 |
| Middle East         | 31.59)      | 30.86)       |               |        | 690.81)       | 702.47)       |             |        | 153.27)       |                | (-2.25) |        | 2.44)  | 0.84)  | (-3.46) |        |
|                     | 45.29       | 45.32        | 0.01 (-0.05,  |        | 1180.13       | 1217.49       | 0.11 (0.10, |        | 116.05        | 86.05 (57.10,  | -1.02   |        | 1.16   | 0.54   | -2.61   |        |
| Sub-Saharan Africa  | (28.66,     | (28.72,      | 0.06)         | 0.814  | (903.50,      | (928.38,      | 0.12)       | <0.001 | (78.24,       | 121.78)        | (-1.10, | <0.001 | (0.68, | (0.35, | (-2.84, | <0.001 |
|                     | 65.28)      | 64.81)       |               |        | 1530.34)      | 1587.25)      |             |        | 161.49)       |                | (-0.94) |        | 1.83)  | 0.85)  | (-2.38) |        |
|                     | 17.16       | 15.41        | -0.37 (-0.40, |        | 317.00        | 313.07        | -0.05       |        | 154.59        | 57.89 (45.48,  | -3.31   |        | 2.70   | 0.83   | -3.96   |        |
| Southeast Asia      | (11.39,     | (10.03,      | -0.33)        | <0.001 | (247.55,      | (243.45,      | (-0.06,     | <0.001 | (117.93,      | 71.67)         | (-3.46, | <0.001 | (2.00, | (0.63, | (-4.15, | <0.001 |
|                     | 23.78)      | 21.43)       |               |        | 412.24)       | 407.32)       | (-0.03)     |        | 199.36)       |                | (-3.16) |        | 3.54)  | 1.06)  | (-3.78) |        |
|                     | 56.88       | 55.43        | -0.08 (-0.13, |        | 1559.26       | 1611.06       | 0.12 (0.10, |        | 147.40        | 109.30 (75.77, | -1.01   |        | 1.43   | 0.64   | -2.73   |        |
| Eastern Sub-Saharan | (36.43,     | (35.28,      | -0.03)        | 0.001  | (1181.62,     | (1230.49,     | 0.15)       | <0.001 | (102.96,      | 153.25)        | (-1.08, | <0.001 | (0.94, | (0.48, | (-2.83, | <0.001 |
| Africa              | 82.48)      | 81.09)       |               |        | 2013.68)      | 2094.29)      |             |        | 196.57)       |                | (-0.93) |        | 2.07)  | 0.89)  | (-2.63) |        |
|                     | 15.68       | 14.75 (9.69, | -0.22 (-0.24, |        | 431.43        | 420.38        | -0.08       |        | 83.77 (73.53, | 32.23 (23.37,  | -3.24   |        | 1.22   | 0.24   | -5.49   |        |
| Central Latin       | (10.51,     | 21.34)       | -0.20)        | <0.001 | (333.50,      | (324.42,      | (-0.11,     | <0.001 | 95.79)        | 43.54)         | (-3.43, | <0.001 | (1.12, | (0.19, | (-5.93, | <0.001 |
| America             | 22.30)      |              |               |        | 553.09)       | 541.15)       | (-0.06)     |        |               |                | (-3.05) |        | 1.35)  | 0.29)  | (-5.04) |        |
|                     | 39.79       | 38.66        | -0.09 (-0.12, |        | 1203.46       | 1200.01       | -0.01       |        | 145.79        | 84.88 (60.63,  | -1.83   |        | 1.72   | 0.54   | -3.84   |        |
| Tropical Latin      | (25.37,     | (24.45,      | -0.06)        | <0.001 | (915.87,      | (913.42,      | (-0.01,     | 0.129  | (119.97,      | 116.96)        | (-2.09, | <0.001 | (1.57, | (0.49, | (-4.19, | <0.001 |
| America             | 58.25)      | 57.38)       |               |        | 1548.60)      | 1564.43)      | 0.00)       |        | 177.49)       |                | (-1.57) |        | 1.87)  | 0.61)  | (-3.48) |        |
|                     | 57.09       | 56.83        | -0.02 (-0.03, |        | 1675.16       | 1668.53       | -0.01       |        | 127.45        | 112.11 (71.18, | -0.45   |        | 0.95   | 0.64   | -1.31   |        |
| Central Sub-Saharan | (36.02,     | (35.83,      | -0.00)        | 0.021  | (1276.60,     | (1264.63,     | (-0.03,     | 0.160  | (86.17,       | 173.46)        | (-0.49, | <0.001 | (0.51, | (0.28, | (-1.50, | <0.001 |
| Africa              | 85.40)      | 86.12)       |               |        | 2154.17)      | 2172.63)      | 0.00)       |        | 181.18)       |                | (-0.40) |        | 1.62)  | 1.59)  | (-1.12) |        |
|                     | 1.44 (0.75, | 0.93 (0.42,  | -1.51 (-1.61, |        | 13.48 (9.50,  | 9.70 (6.67,   | -1.16       |        | 23.90 (22.03, | 8.65 (7.64,    | -3.48   |        | 0.45   | 0.16   | -3.60   |        |
| Western Europe      | 2.40)       | 1.69)        | -1.41)        | <0.001 | 18.25)        | 13.50)        | (-1.31,     | <0.001 | 25.89)        | 9.79)          | (-3.78, | <0.001 | (0.41, | (0.14, | (-3.91, | <0.001 |
|                     |             |              |               |        |               |               | (-1.02)     |        |               |                | (-3.18) |        | 0.49)  | 0.18)  | (-3.28) |        |
|                     |             |              |               |        |               |               | (-1.09)     |        |               |                | (-3.54) |        | 0.49   | 0.16   | (-3.90) |        |
| High-income North   | 3.20 (1.79, | 2.31 (1.38,  | -1.12 (-1.21, |        | 41.01 (30.29, | 29.70 (25.23, | (-1.12,     | <0.001 | 27.86 (25.83, | 9.80 (8.70,    | (-4.02, | <0.001 | (0.46, | (0.14, | (-4.45, | <0.001 |
| America             | 4.92)       | 3.30)        | -1.03)        | <0.001 | 53.67)        | 34.81)        | (-1.07)     |        | 30.09)        | 11.09)         | (-3.06) |        | 0.53)  | 0.18)  | (-3.36) |        |

|                                           |                    |                   |                      |        |                       |                      |                      |        |                      |                        |                      |               |               |                |        |
|-------------------------------------------|--------------------|-------------------|----------------------|--------|-----------------------|----------------------|----------------------|--------|----------------------|------------------------|----------------------|---------------|---------------|----------------|--------|
|                                           | 31.43              | 30.69             | -0.08 (-0.11, 0.04)  | <0.001 | 781.30                | 861.04               | 0.34 (0.32, 0.35)    | <0.001 | 405.06               | 174.88                 | -2.83                | 7.12          | 2.59          | -3.35          |        |
| Central Asia                              | (21.66, 43.74)     | (19.69, 45.33)    |                      |        | (603.92, 1007.81)     | (664.21, 1101.27)    |                      |        | (364.08, 449.81)     | (141.64, 216.82)       | (-3.45, -2.20)       | (6.41, 7.89)  | (2.05, 3.25)  | (-4.06, -2.65) | <0.001 |
|                                           | 17.50              | 7.19 (4.46, 9.96) | -3.04 (-3.12, -2.96) | <0.001 | 98.25 (76.91, 121.23) | 56.03 (44.01, 69.37) | -1.93 (-2.02, -1.83) | <0.001 | 204.65               | 42.83 (35.10, 52.32)   | -5.05 (-6.14, -3.94) | 3.87          | 0.78          | -5.19          |        |
| Eastern Europe                            | (11.45, 23.32)     |                   |                      |        |                       |                      |                      |        | (169.90, 240.28)     |                        |                      | (3.21, 4.56)  | (0.63, 0.96)  | (-6.30, -4.05) | <0.001 |
|                                           | 52.24              | 51.34             | -0.06 (-0.09, -0.04) | <0.001 | 1488.80               | 1506.00              | 0.04 (0.03, 0.05)    | <0.001 | 213.22               | 144.74                 | -1.33                | 2.76          | 1.43          | -2.25          |        |
| Southern Sub-Saharan Africa               | (33.02, 76.70)     | (32.58, 75.75)    |                      |        | (1133.80, 1921.19)    | (1150.37, 1944.27)   |                      |        | (161.30, 279.61)     | (104.27, 197.56)       | (-1.69, -0.97)       | (1.94, 3.77)  | (0.94, 2.21)  | (-2.84, -1.65) | <0.001 |
|                                           | 1.06 (0.45, 1.98)  | 0.55 (0.19, 1.11) | -2.19 (-2.34, -2.04) | <0.001 | 17.20 (12.94, 22.53)  | 11.75 (8.82, 15.27)  | -1.32 (-1.41, -1.24) | <0.001 | 15.14 (13.69, 16.82) | 4.67 (4.05, 5.37)      | -3.95 (-4.29, -3.61) | 0.27          | 0.08          | -4.29          |        |
| High-income Asia Pacific                  |                    |                   |                      |        |                       |                      |                      |        |                      |                        |                      | (0.25, 0.30)  | (0.07, 0.09)  | (-4.72, -3.86) | <0.001 |
|                                           | 7.63 (5.30, 10.02) | 4.07 (2.57, 5.87) | -2.15 (-2.29, -2.01) | <0.001 | 63.31 (51.69, 76.25)  | 44.01 (34.94, 54.88) | -1.23 (-1.46, -1.00) | <0.001 | 169.23               | 21.85 (18.82, 25.34)   | -6.89 (-7.12, -6.66) | 3.21          | 0.38          | -7.18          |        |
| Central Europe                            |                    |                   |                      |        |                       |                      |                      |        | (157.46, 180.99)     |                        |                      | (2.98, 3.45)  | (0.32, 0.44)  | (-7.43, -6.93) | <0.001 |
|                                           | 36.34              | 36.19             | -0.02 (-0.04, -0.00) | 0.019  | 1099.22               | 1109.56              | 0.03 (0.01, 0.04)    | <0.001 | 111.39               | 71.15 (47.18, 103.85)  | -1.51 (-1.68, -1.33) | 1.14          | 0.35          | -3.91          |        |
| Andean Latin America                      | (22.76, 54.28)     | (22.49, 53.30)    |                      |        | (836.84, 1429.72)     | (847.83, 1418.17)    |                      |        | (83.02, 147.68)      |                        |                      | (0.83, 1.57)  | (0.23, 0.52)  | (-4.23, -3.60) | <0.001 |
|                                           | 34.45              | 36.44             | 0.20 (0.18, 0.21)    | <0.001 | 1026.60               | 1072.29              | 0.15 (0.14, 0.16)    | <0.001 | 197.22               | 138.80 (92.19, 212.16) | -1.12 (-1.35, -0.88) | 2.87          | 1.70          | -1.65          |        |
| Caribbean                                 | (21.76, 49.18)     | (22.85, 53.23)    |                      |        | (793.65, 1325.54)     | (822.14, 1381.94)    |                      |        | (141.80, 262.46)     |                        |                      | (1.95, 4.06)  | (0.94, 3.00)  | (-2.02, -1.29) | <0.001 |
|                                           | 22.14              | 21.42             | -0.11 (-0.26, 0.04)  | 0.141  | 650.06                | 678.29               | 0.14 (0.10, 0.18)    | <0.001 | 107.06               | 49.38 (34.82, 69.20)   | -2.63 (-2.77, -2.49) | 1.48          | 0.33          | -4.98          |        |
| Southern Latin America                    | (14.18, 32.29)     | (13.70, 30.86)    |                      |        | (494.50, 837.59)      | (519.92, 877.71)     |                      |        | (89.63, 128.03)      |                        |                      | (1.24, 1.76)  | (0.25, 0.43)  | (-5.26, -4.69) | <0.001 |
|                                           | 40.70              | 42.59             | 0.16 (0.10, 0.21)    | <0.001 | 666.41                | 707.89               | 0.21 (0.19, 0.24)    | <0.001 | 821.48               | 645.80                 | -0.84                | 15.27         | 11.83         | -0.89          |        |
| Oceania                                   | (25.84, 58.26)     | (25.82, 61.02)    |                      |        | (518.90, 869.55)      | (553.27, 919.81)     |                      |        | (363.84, 1689.52)    | (281.74, 1307.16)      | (-1.02, -0.65)       | (6.45, 32.04) | (4.77, 24.64) | (-1.08, -0.69) | <0.001 |
|                                           | 1.55 (0.65, 2.68)  | 1.21 (0.47, 2.26) | -0.83 (-0.95, -0.72) | <0.001 | 19.28 (13.16, 26.61)  | 18.01 (12.28, 25.04) | -0.24 (-0.34, -0.14) | <0.001 | 36.68 (29.68, 44.28) | 17.75 (13.83, 22.67)   | -2.53 (-3.26, -1.79) | 0.69          | 0.32          | -2.62          |        |
| Australasia                               |                    |                   |                      |        |                       |                      |                      |        |                      |                        |                      | (0.55, 0.83)  | (0.25, 0.41)  | (-3.39, -1.85) | <0.001 |
| <b>Ischemic heart disease 15-19 years</b> |                    |                   |                      |        |                       |                      |                      |        |                      |                        |                      |               |               |                |        |

| Women                        |                    |                    |                      |        |                      |                      |                     |        |                         |                         |                      |        |                   |                   |                      |        |
|------------------------------|--------------------|--------------------|----------------------|--------|----------------------|----------------------|---------------------|--------|-------------------------|-------------------------|----------------------|--------|-------------------|-------------------|----------------------|--------|
|                              | 2016               | 2017               | 2018                 | 2019   | 2020                 | 2021                 | 2022                | 2023   | 2024                    | 2025                    | 2026                 | 2027   | 2028              | 2029              | 2030                 | 2031   |
| Global                       | 4.11 (1.10, 8.63)  | 4.29 (1.14, 8.97)  | 0.15 (0.13, 0.17)    | <0.001 | 14.72 (10.59, 19.89) | 14.53 (10.44, 19.46) | -0.03 (-0.11, 0.05) | 0.485  | 130.37 (113.79, 151.40) | 92.92 (80.55, 106.06)   | -1.16 (-1.58, -0.74) | <0.001 | 1.82 (1.59, 2.11) | 1.30 (1.13, 1.48) | -1.16 (-1.58, -0.74) | <0.001 |
| SDI category                 |                    |                    |                      |        |                      |                      |                     |        |                         |                         |                      |        |                   |                   |                      |        |
| High                         | 5.46 (1.55, 11.06) | 6.48 (2.20, 12.45) | 0.60 (0.54, 0.66)    | <0.001 | 19.36 (13.87, 26.06) | 22.95 (16.62, 30.74) | 0.62 (0.50, 0.73)   | <0.001 | 41.98 (36.73, 47.86)    | 13.27 (11.25, 15.46)    | -3.80 (-4.16, -3.44) | <0.001 | 0.59 (0.51, 0.67) | 0.18 (0.16, 0.21) | -3.83 (-4.19, -3.46) | <0.001 |
| High-middle                  | 4.07 (1.13, 8.57)  | 4.14 (1.09, 8.66)  | 0.05 (0.01, 0.09)    | 0.018  | 18.27 (13.33, 24.32) | 18.96 (13.84, 25.01) | 0.13 (0.10, 0.16)   | <0.001 | 76.56 (64.74, 91.78)    | 47.81 (40.13, 55.49)    | -1.62 (-2.03, -1.21) | <0.001 | 1.07 (0.90, 1.28) | 0.67 (0.56, 0.77) | -1.63 (-2.04, -1.22) | <0.001 |
| Middle                       | 3.84 (1.02, 8.09)  | 4.06 (1.08, 8.51)  | 0.19 (0.16, 0.23)    | <0.001 | 14.65 (10.32, 19.75) | 15.43 (10.98, 20.84) | 0.19 (0.14, 0.24)   | <0.001 | 149.44 (130.41, 169.49) | 107.26 (91.58, 124.39)  | -1.10 (-1.39, -0.81) | <0.001 | 2.09 (1.82, 2.37) | 1.50 (1.28, 1.74) | -1.10 (-1.39, -0.81) | <0.001 |
| Low-middle                   | 3.89 (0.87, 8.34)  | 4.04 (0.86, 8.64)  | 0.12 (0.09, 0.15)    | <0.001 | 11.67 (8.24, 15.90)  | 12.12 (8.52, 16.57)  | 0.15 (0.04, 0.27)   | 0.008  | 198.31 (159.41, 244.63) | 129.23 (106.58, 153.60) | -1.46 (-1.94, -0.98) | <0.001 | 2.77 (2.23, 3.42) | 1.81 (1.49, 2.15) | -1.46 (-1.94, -0.98) | <0.001 |
| Low                          | 4.05 (0.94, 8.59)  | 4.10 (0.96, 8.79)  | 0.04 (0.01, 0.07)    | 0.010  | 9.61 (6.71, 13.21)   | 9.85 (6.87, 13.61)   | 0.10 (-0.00, 0.21)  | 0.062  | 117.73 (89.36, 156.88)  | 87.77 (70.52, 109.61)   | -1.00 (-1.22, -0.79) | <0.001 | 1.65 (1.25, 2.19) | 1.23 (0.99, 1.53) | -1.00 (-1.22, -0.79) | <0.001 |
| 21 GBD region                |                    |                    |                      |        |                      |                      |                     |        |                         |                         |                      |        |                   |                   |                      |        |
| South Asia                   | 3.95 (0.81, 8.51)  | 4.05 (0.80, 8.64)  | 0.08 (0.04, 0.12)    | <0.001 | 10.79 (7.41, 14.94)  | 11.62 (8.07, 16.17)  | 0.28 (0.16, 0.41)   | <0.001 | 250.53 (194.35, 312.34) | 155.34 (127.91, 183.56) | -1.70 (-2.38, -1.02) | <0.001 | 3.51 (2.72, 4.37) | 2.17 (1.79, 2.57) | -1.70 (-2.38, -1.03) | <0.001 |
| East Asia                    | 3.15 (0.64, 7.13)  | 3.31 (0.61, 7.36)  | 0.18 (0.10, 0.25)    | <0.001 | 15.02 (10.26, 21.07) | 18.32 (12.66, 25.08) | 0.68 (0.65, 0.72)   | <0.001 | 82.54 (66.87, 100.59)   | 43.75 (35.67, 51.89)    | -2.27 (-2.65, -1.88) | <0.001 | 1.15 (0.93, 1.40) | 0.61 (0.49, 0.72) | -2.28 (-2.66, -1.89) | <0.001 |
| North Africa and Middle East | 5.20 (1.44, 10.44) | 5.14 (1.45, 10.18) | -0.04 (-0.06, -0.02) | <0.001 | 21.98 (15.75, 29.16) | 21.83 (15.82, 28.83) | -0.02 (-0.05, 0.00) | 0.068  | 358.79 (297.94, 426.96) | 187.19 (141.56, 241.84) | -2.16 (-2.48, -1.83) | <0.001 | 5.01 (4.16, 5.97) | 2.62 (1.98, 3.38) | -2.16 (-2.48, -1.83) | <0.001 |
| Western Sub-Saharan Africa   | 3.65 (0.75, 8.14)  | 3.78 (0.75, 8.45)  | 0.12 (0.10, 0.13)    | <0.001 | 7.81 (5.26, 11.01)   | 7.90 (5.29, 11.17)   | 0.06 (-0.04, 0.16)  | 0.229  | 73.93 (51.83, 101.13)   | 58.86 (42.13, 81.05)    | -0.79 (-0.97, -0.60) | <0.001 | 1.03 (0.72, 1.41) | 0.82 (0.59, 1.13) | -0.79 (-0.97, -0.60) | <0.001 |

|                             | Mean        | SD          | CI            | P      | Mean          | SD            | CI           | P      | Mean          | SD            | CI      | P      | Mean   | SD     | CI           | P      |
|-----------------------------|-------------|-------------|---------------|--------|---------------|---------------|--------------|--------|---------------|---------------|---------|--------|--------|--------|--------------|--------|
| Southeast Asia              | 3.25 (0.81, | 3.64 (1.01, | 0.40 (0.34,   | <0.001 | 13.16 (9.30,  | 14.52 (10.35, | 0.36 (0.25,  | <0.001 | 117.98        | 97.51 (81.27, | -0.65   | <0.001 | 1.65   | 1.36   | -0.65        | <0.001 |
|                             | 7.14)       | 7.69)       | 0.46)         |        | 17.54)        | 19.08)        | 0.48)        |        | (93.28,       | 113.44)       | (-0.84, |        | (1.30, | (1.14, | (-0.84,      |        |
|                             |             |             |               |        |               |               |              |        |               | 156.53)       |         |        | -0.46) | 2.19)  | 1.58)        |        |
| Eastern Sub-Saharan Africa  | 3.68 (0.76, | 3.76 (0.81, | 0.06 (0.03,   | 0.001  | 7.11 (4.80,   | 7.18 (4.78,   | 0.05 (-0.04, | 0.274  | 90.69 (63.24, | 71.97 (52.46, | -0.79   | <0.001 | 1.27   | 1.01   | -0.79        | <0.001 |
|                             | 8.05)       | 8.37)       | 0.10)         |        | 10.16)        | 10.16)        | 0.14)        |        | (134.95)      | 93.69)        | (-0.93, |        | (0.88, | (0.73, | (-0.93,      |        |
| Central Latin America       | 4.87 (1.26, | 4.14 (0.85, | -0.55 (-0.60, | <0.001 | 15.63 (11.11, | 13.64 (9.64,  | -0.46        | <0.001 | 89.83 (82.72, | 53.78 (45.43, | -1.76   | <0.001 | 1.26   | 0.75   | -1.76        | <0.001 |
|                             | 10.01)      | 8.84)       | -0.50)        |        | 21.14)        | 18.78)        | (-0.49,      |        | 96.90)        | 63.70)        | (-2.50, |        | (1.16, | (0.63, | (-2.51,      |        |
|                             |             |             |               |        |               |               |              |        | -0.44)        |               |         |        | -1.02) | 1.35)  | 0.89)        |        |
| Tropical Latin America      | 3.43 (0.76, | 3.42 (0.81, | -0.02 (-0.11, | 0.731  | 10.41 (7.07,  | 10.66 (7.32,  | 0.10 (-0.00, | 0.060  | 45.78 (41.88, | 30.94 (27.64, | -1.21   | <0.001 | 0.64   | 0.43   | -1.22        | <0.001 |
|                             | 7.75)       | 7.72)       | 0.08)         |        | 14.47)        | 14.78)        | 0.20)        |        | 49.78)        | 34.31)        | (-1.68, |        | (0.58, | (0.39, | (-1.68,      |        |
| Central Sub-Saharan Africa  | 4.46 (0.95, | 4.30 (0.87, | -0.13 (-0.15, | <0.001 | 8.98 (6.14,   | 8.55 (5.69,   | -0.15        | <0.001 | 50.03 (29.56, | 41.98 (26.28, | -0.63   | <0.001 | 0.70   | 0.59   | -0.63        | <0.001 |
|                             | 9.57)       | 9.29)       | -0.11)        |        | 12.44)        | 12.14)        | (-0.20,      |        | 83.97)        | 65.41)        | (-0.76, |        | (0.41, | (0.37, | (-0.76,      |        |
|                             |             |             |               |        |               |               |              |        | -0.11)        |               |         |        | -0.51) | 1.17)  | 0.91)        |        |
| Western Europe              | 6.71 (2.22, | 6.92 (2.35, | 0.12 (0.09,   | <0.001 | 21.29 (15.06, | 24.39 (17.53, | 0.49 (0.44,  | <0.001 | 20.60 (18.75, | 5.87 (5.07,   | -4.30   | <0.001 | 0.29   | 0.08   | -4.34        | <0.001 |
|                             | 12.79)      | 13.23)      | 0.15)         |        | 28.91)        | 32.60)        | 0.53)        |        | 22.54)        | 6.57)         | (-4.65, |        | (0.26, | (0.07, | (-4.70,      |        |
| High-income North America   | 5.23 (1.10, | 7.52 (2.71, | 1.26 (1.21,   | <0.001 | 17.65 (12.53, | 22.99 (16.14, | 0.93 (0.84,  | <0.001 | 15.96 (14.61, | 12.72 (11.17, | -0.49   | 0.200  | 0.22   | 0.18   | -0.74        | 0.227  |
|                             | 11.29)      | 14.25)      | 1.32)         |        | 24.28)        | 30.83)        | 1.01)        |        | 17.21)        | 14.14)        | (-1.24, |        | (0.20, | (0.15, | (-1.92,      |        |
|                             |             |             |               |        |               |               |              |        |               |               |         |        | 0.26)  | 0.24)  | 0.20)        |        |
| Central Asia                | 6.09 (1.80, | 5.93 (1.69, | -0.09 (-0.11, | <0.001 | 22.23 (16.24, | 21.27 (15.19, | -0.14        | <0.001 | 83.82 (74.80, | 86.33 (72.26, | 0.20    | 0.364  | 1.17   | 1.21   | 0.20 (-0.24, | 0.363  |
|                             | 11.92)      | 11.65)      | -0.06)        |        | 29.59)        | 28.69)        | (-0.19,      |        | 93.17)        | 102.35)       | (-0.24, |        | (1.05, | (1.01, | 0.65)        |        |
| Eastern Europe              | 5.60 (1.46, | 5.98 (1.71, | 0.22 (0.19,   | <0.001 | 24.57 (17.61, | 27.38 (19.59, | 0.39 (0.34,  | <0.001 | 35.23 (31.77, | 29.22 (24.26, | -0.67   | 0.367  | 0.49   | 0.41   | -0.67        | 0.367  |
|                             | 11.14)      | 11.71)      | 0.25)         |        | 33.03)        | 36.09)        | 0.44)        |        | 38.38)        | 34.03)        | (-2.11, |        | (0.44, | (0.34, | (-2.12,      |        |
|                             |             |             |               |        |               |               |              |        |               |               |         |        | 0.79)  | 0.53)  | 0.48)        |        |
| Southern Sub-Saharan Africa | 5.01 (1.19, | 4.60 (0.94, | -0.29 (-0.33, | <0.001 | 11.01 (7.63,  | 9.78 (6.78,   | -0.40        | <0.001 | 36.10 (28.54, | 24.51 (16.61, | -1.15   | 0.001  | 0.50   | 0.34   | -1.16        | 0.001  |
|                             | 10.40)      | 9.75)       | -0.26)        |        | 15.31)        | 13.72)        | (-0.43,      |        | 44.41)        | 35.57)        | (-1.81, |        | (0.40, | (0.23, | (-1.82,      |        |
| High-income Asia Pacific    | 4.34 (1.05, | 4.42 (1.09, | 0.06 (0.03,   | <0.001 | 17.64 (12.60, | 19.60 (14.05, | 0.39 (0.33,  | <0.001 | 94.42 (74.84, | 7.20 (5.77,   | -8.55   | <0.001 | 1.32   | 0.10   | -8.59        | <0.001 |
|                             | 9.02)       | 9.17)       | 0.09)         |        | 24.06)        | 26.96)        | 0.45)        |        | 113.62)       | 8.57)         | (-9.52, |        | (1.05, | (0.08, | (-9.55,      |        |
|                             |             |             |               |        |               |               |              |        |               |               |         |        | -7.58) | 1.59)  | 0.12)        |        |

|                        | 2019         | 2020         | 2021          | 2022   | 2019          | 2020          | 2021        | 2022   | 2019          | 2020           | 2021    | 2022   | 2019   | 2020   | 2021        | 2022   |
|------------------------|--------------|--------------|---------------|--------|---------------|---------------|-------------|--------|---------------|----------------|---------|--------|--------|--------|-------------|--------|
| Central Europe         | 4.04 (1.09,  | 4.10 (1.08,  | 0.05 (-0.01,  | 0.108  | 24.53 (18.41, | 25.86 (19.15, | 0.21 (0.15, | <0.001 | 31.85 (28.78, | 13.56 (11.26,  | -2.92   | <0.001 | 0.44   | 0.19   | -2.94       | <0.001 |
|                        | 8.63)        | 8.57)        | 0.11)         |        | 32.22)        | 33.88)        | 0.28)       |        | 34.94)        | 16.03)         | (-3.33, |        | (0.40, | (0.16, | (-3.36,     |        |
| Andean Latin America   | 2.24 (0.28,  | 2.25 (0.29,  | 0.02 (-0.03,  | 0.439  | 7.70 (5.14,   | 8.15 (5.59,   | 0.21 (0.18, | <0.001 | 138.60        | 69.44 (50.46,  | -2.45   | <0.001 | 1.94   | 0.97   | -2.46       | <0.001 |
|                        | 5.77)        | 5.61)        | 0.06)         |        | 10.77)        | 11.26)        | 0.23)       |        | (106.34,      | 94.47)         | (-3.25, |        | (1.49, | (0.70, | (-3.26,     |        |
| Caribbean              | 12.11 (5.17, | 12.06 (5.33, | -0.01 (-0.04, | 0.288  | 28.23 (20.35, | 27.90 (20.14, | -0.04       | <0.001 | 93.80 (71.88, | 82.32 (49.95,  | -0.41   | 0.261  | 1.31   | 1.15   | -0.40       | 0.261  |
|                        | 21.25)       | 21.70)       | 0.01)         |        | 36.89)        | 36.79)        | (-0.05,     |        | 119.54)       | 126.72)        | (-1.11, |        | (1.00, | (0.70, | (-1.11,     |        |
| Southern Latin America | 3.31 (0.56,  | 3.22 (0.62,  | -0.07 (-0.14, | 0.061  | 13.06 (9.22,  | 15.19 (10.92, | 0.55 (0.47, | <0.001 | 67.73 (55.84, | 24.37 (19.76,  | -3.65   | <0.001 | 0.95   | 0.34   | -3.65       | <0.001 |
|                        | 7.34)        | 7.37)        | 0.00)         |        | 17.95)        | 20.68)        | 0.62)       |        | 81.33)        | 29.69)         | (-4.22, |        | (0.78, | (0.28, | (-4.22,     |        |
| Oceania                | 3.92 (0.69,  | 3.96 (0.53,  | 0.04 (0.01,   | 0.011  | 15.41 (10.69, | 15.73 (11.10, | 0.09 (0.04, | <0.001 | 58.66 (31.80, | 75.48 (42.26,  | 0.81    | 0.003  | 0.82   | 1.05   | 0.81 (0.28, | 0.003  |
|                        | 8.37)        | 8.66)        | 0.08)         |        | 20.84)        | 21.44)        | 0.14)       |        | 101.24)       | 125.98)        | (0.28,  |        | (0.44, | (0.59, | 1.35)       |        |
| Australasia            | 4.97 (1.09,  | 4.32 (0.79,  | -0.49 (-0.55, | <0.001 | 21.42 (15.55, | 21.75 (15.35, | 0.06 (0.01, | 0.021  | 11.10 (9.03,  | 2.78 (2.14,    | -4.51   | <0.001 | 0.15   | 0.04   | -4.57       | <0.001 |
|                        | 10.42)       | 9.17)        | -0.43)        |        | 29.33)        | 29.32)        | 0.12)       |        | 13.77)        | 3.55)          | (-6.14, |        | (0.12, | (0.03, | (-6.23,     |        |
| <b>Men</b>             |              |              |               |        |               |               |             |        |               |                |         |        |        |        |             |        |
| Global                 | 4.75 (1.22,  | 5.04 (1.41,  | 0.21 (0.19,   | <0.001 | 14.23 (10.05, | 14.69 (10.42, | 0.12 (0.05, | <0.001 | 141.65        | 113.12 (96.00, | -0.88   | 0.009  | 1.98   | 1.58   | -0.88       | 0.009  |
|                        | 9.82)        | 10.31)       | 0.22)         |        | 19.56)        | 19.72)        | 0.19)       |        | (123.69,      | 133.94)        | (-1.53, |        | (1.73, | (1.34, | (-1.53,     |        |
| <b>SDI category</b>    |              |              |               |        |               |               |             |        |               |                |         |        |        |        |             |        |
| High                   | 5.13 (1.44,  | 5.76 (1.76,  | 0.40 (0.39,   | <0.001 | 16.41 (11.73, | 17.89 (12.85, | 0.31 (0.28, | <0.001 | 83.40 (57.69, | 25.41 (22.68,  | -3.98   | <0.001 | 1.16   | 0.35   | -3.98       | <0.001 |
|                        | 10.67)       | 11.34)       | 0.42)         |        | 22.37)        | 24.06)        | 0.33)       |        | 95.79)        | 28.46)         | (-4.26, |        | (0.81, | (0.32, | (-4.27,     |        |
| High-middle            | 4.46 (1.02,  | 4.29 (1.04,  | -0.14 (-0.16, | <0.001 | 15.41 (10.93, | 15.12 (10.77, | -0.06       | 0.001  | 135.12        | 84.24 (72.63,  | -1.75   | <0.001 | 1.89   | 1.18   | -1.75       | <0.001 |
|                        | 9.42)        | 9.08)        | -0.11)        |        | 20.97)        | 20.49)        | (-0.10,     |        | (111.24,      | 97.95)         | (-2.41, |        | (1.55, | (1.02, | (-2.41,     |        |
| Middle                 | 4.60 (1.24,  | 4.82 (1.30,  | 0.16 (0.14,   | <0.001 | 14.49 (10.20, | 15.47 (11.05, | 0.24 (0.19, | <0.001 | 175.14        | 150.62         | -0.54   | 0.065  | 2.45   | 2.11   | -0.53       | 0.067  |
|                        | 9.51)        | 9.89)        | 0.17)         |        | 19.87)        | 21.13)        | 0.28)       |        | (151.38,      | 182.81)        | (-1.10, |        | (2.12, | (1.76, | (-1.09,     |        |
| Low-middle             | 4.76 (1.16,  | 5.02 (1.24,  | 0.19 (0.18,   | <0.001 | 12.71 (8.84,  | 13.90 (9.77,  | 0.32 (0.22, | <0.001 | 135.24        | 115.83 (93.48, | -0.74   | 0.379  | 1.89   | 1.62   | -0.74       | 0.381  |
| 141                    |              |              |               |        |               |               |             |        |               |                |         |        |        |        |             |        |

|                              |                    |                    |                      |        |                      |                      |                     |        |                         |                         |                      |        |                   |                   |                      |        |
|------------------------------|--------------------|--------------------|----------------------|--------|----------------------|----------------------|---------------------|--------|-------------------------|-------------------------|----------------------|--------|-------------------|-------------------|----------------------|--------|
|                              | 9.92)              | 10.34)             | 0.20)                |        | 17.57)               | 19.02)               | 0.41)               |        | (112.66, 162.20)        | 143.20)                 | (-2.37, 0.92)        |        | (1.58, 2.27)      | (1.31, 2.00)      | (-2.37, 0.92)        |        |
| Low                          | 5.32 (1.33, 10.87) | 5.58 (1.56, 11.16) | 0.16 (0.14, 0.19)    | <0.001 | 11.87 (8.32, 16.38)  | 12.75 (8.89, 17.69)  | 0.27 (0.14, 0.40)   | <0.001 | 119.78 (93.11, 151.36)  | 114.16 (88.66, 141.63)  | -0.15 (-0.81, 0.51)  | 0.657  | 1.67 (1.30, 2.12) | 1.60 (1.24, 1.98) | -0.15 (-0.80, 0.51)  | 0.662  |
| <b>21 GBD region</b>         |                    |                    |                      |        |                      |                      |                     |        |                         |                         |                      |        |                   |                   |                      |        |
| South Asia                   | 4.73 (1.07, 9.92)  | 4.84 (1.11, 10.11) | 0.09 (0.08, 0.10)    | <0.001 | 12.20 (8.37, 17.09)  | 13.61 (9.35, 18.90)  | 0.38 (0.35, 0.42)   | <0.001 | 143.13 (111.98, 178.34) | 121.08 (91.96, 153.83)  | -1.13 (-3.63, 1.43)  | 0.383  | 2.00 (1.57, 2.50) | 1.70 (1.29, 2.15) | -1.13 (-3.62, 1.43)  | 0.384  |
| East Asia                    | 3.73 (0.68, 8.38)  | 3.52 (0.67, 8.04)  | -0.20 (-0.30, -0.10) | <0.001 | 13.36 (8.95, 18.75)  | 13.48 (9.07, 18.98)  | 0.04 (-0.01, 0.07)  | 0.093  | 165.89 (122.60, 202.74) | 105.02 (85.08, 129.29)  | -1.54 (-1.93, -1.16) | <0.001 | 2.32 (1.71, 2.83) | 1.47 (1.19, 1.81) | -1.54 (-1.93, -1.15) | <0.001 |
| North Africa and Middle East | 6.65 (2.22, 12.95) | 6.65 (2.15, 12.87) | 0.01 (-0.07, 0.10)   | 0.784  | 25.17 (18.07, 33.52) | 26.01 (18.75, 34.20) | 0.14 (0.08, 0.19)   | <0.001 | 356.58 (293.58, 432.94) | 252.31 (182.27, 338.12) | -1.16 (-1.42, -0.90) | <0.001 | 4.98 (4.10, 6.05) | 3.53 (2.55, 4.73) | -1.16 (-1.41, -0.90) | <0.001 |
| Western Sub-Saharan Africa   | 5.24 (1.31, 10.78) | 5.67 (1.49, 11.30) | 0.27 (0.26, 0.28)    | <0.001 | 10.97 (7.64, 15.24)  | 11.62 (8.05, 16.28)  | 0.24 (0.07, 0.40)   | 0.004  | 70.46 (50.29, 97.36)    | 65.57 (46.86, 91.11)    | -0.23 (-0.42, -0.04) | 0.017  | 0.98 (0.70, 1.36) | 0.92 (0.65, 1.27) | -0.23 (-0.41, -0.04) | 0.018  |
| Southeast Asia               | 4.22 (1.11, 8.88)  | 4.31 (1.18, 9.14)  | 0.07 (0.03, 0.11)    | <0.001 | 14.09 (9.96, 18.92)  | 14.38 (10.17, 19.41) | 0.09 (0.02, 0.16)   | 0.009  | 102.42 (82.93, 128.55)  | 138.05 (112.07, 164.82) | 1.07 (0.93, 1.22)    | <0.001 | 1.43 (1.16, 1.80) | 1.93 (1.57, 2.31) | 1.08 (0.93, 1.22)    | <0.001 |
| Eastern Sub-Saharan Africa   | 5.28 (1.24, 10.91) | 5.60 (1.48, 11.34) | 0.21 (0.19, 0.22)    | <0.001 | 10.07 (6.95, 14.07)  | 10.94 (7.58, 15.10)  | 0.32 (0.16, 0.47)   | <0.001 | 133.98 (95.79, 179.61)  | 124.10 (92.09, 159.96)  | -0.24 (-0.38, -0.10) | 0.001  | 1.87 (1.34, 2.51) | 1.74 (1.29, 2.24) | -0.24 (-0.38, -0.10) | 0.001  |
| Central Latin America        | 5.21 (1.11, 10.74) | 5.04 (1.18, 10.47) | -0.12 (-0.13, -0.10) | <0.001 | 12.23 (8.37, 16.88)  | 12.51 (8.68, 17.42)  | 0.09 (0.06, 0.11)   | <0.001 | 118.88 (109.71, 128.98) | 99.22 (81.90, 117.80)   | -0.56 (-1.06, -0.05) | 0.030  | 1.67 (1.54, 1.81) | 1.39 (1.15, 1.65) | -0.55 (-1.06, -0.05) | 0.032  |
| Tropical Latin America       | 4.23 (0.98, 9.34)  | 4.22 (0.92, 9.19)  | -0.02 (-0.06, 0.02)  | 0.429  | 11.44 (7.79, 16.07)  | 11.99 (8.21, 17.02)  | 0.18 (0.14, 0.21)   | <0.001 | 79.63 (71.60, 87.28)    | 87.27 (77.21, 97.51)    | 0.26 (-0.33, 0.86)   | 0.389  | 1.11 (1.00, 1.22) | 1.22 (1.08, 1.37) | 0.26 (-0.33, 0.86)   | 0.388  |
| Central Sub-Saharan Africa   | 6.11 (1.36, 11.89) | 5.94 (1.40, 11.87) | -0.07 (-0.23, 0.09)  | 0.390  | 11.18 (7.66, 15.57)  | 11.09 (7.76, 15.52)  | -0.01 (-0.07, 0.05) | 0.748  | 153.96 (98.76, 240.80)  | 112.33 (68.64, 174.12)  | -1.17 (-1.24, -1.09) | <0.001 | 2.15 (1.38, 3.37) | 1.57 (0.96, 2.44) | -1.16 (-1.24, -1.08) | <0.001 |

|                             | Mean         | SD           | CI            | P      | Mean          | SD            | CI          | P      | Mean          | SD             | CI      | P      | Mean   | SD     | CI           | P      |
|-----------------------------|--------------|--------------|---------------|--------|---------------|---------------|-------------|--------|---------------|----------------|---------|--------|--------|--------|--------------|--------|
| Western Europe              | 5.84 (1.71,  | 5.65 (1.68,  | -0.12 (-0.13, | <0.001 | 16.10 (11.25, | 17.25 (12.38, | 0.23 (0.22, | <0.001 | 52.79 (47.39, | 13.58 (11.45,  | -4.54   | <0.001 | 0.74   | 0.19   | -4.56        | <0.001 |
|                             | 11.57)       | 11.18)       | -0.10)        |        | 22.02)        | 23.42)        | 0.25)       |        | 58.01)        | 15.28)         | (-5.22, |        | (0.66, | (0.16, | (-5.24,      |        |
| High-income North America   | 4.75 (0.90,  | 6.29 (1.84,  | 0.97 (0.90,   | <0.001 | 16.87 (11.61, | 18.10 (12.66, | 0.29 (0.16, | <0.001 | 33.24 (29.40, | 29.45 (26.74,  | -0.42   | 0.357  | 0.46   | 0.41   | -0.41        | 0.370  |
|                             | 10.53)       | 12.41)       | 1.04)         |        | 23.23)        | 24.41)        | 0.42)       |        | 36.54)        | 33.51)         | (-1.30, |        | (0.41, | (0.37, | (-1.30,      |        |
| Central Asia                | 6.02 (1.56,  | 5.60 (1.38,  | -0.23 (-0.28, | <0.001 | 17.03 (12.05, | 16.87 (11.93, | -0.03       | <0.001 | 102.52        | 118.32 (95.95, | 0.64    | 0.190  | 1.43   | 1.66   | 0.64 (-0.31, | 0.189  |
|                             | 11.97)       | 11.39)       | -0.18)        |        | 23.31)        | 23.07)        | (-0.04,     |        | (92.60,       | 144.20)        | (-0.31, |        | (1.30, | (1.34, | 1.59)        |        |
| Eastern Europe              | 5.67 (1.37,  | 5.28 (1.21,  | -0.25 (-0.27, | <0.001 | 15.92 (11.07, | 14.61 (10.39, | -0.29       | <0.001 | 78.40 (68.00, | 74.48 (61.50,  | -0.23   | 0.813  | 1.10   | 1.04   | -0.22        | 0.817  |
|                             | 11.54)       | 10.79)       | -0.23)        |        | 22.03)        | 20.09)        | (-0.34,     |        | 84.63)        | 89.65)         | (-2.08, |        | (0.95, | (0.86, | (-2.08,      |        |
| Southern Sub-Saharan Africa | 6.64 (1.96,  | 6.71 (2.03,  | 0.04 (0.03,   | <0.001 | 13.63 (9.48,  | 14.25 (9.86,  | 0.17 (0.13, | <0.001 | 29.81 (21.93, | 35.48 (23.57,  | 0.91    | <0.001 | 0.42   | 0.50   | 0.91 (0.66,  | <0.001 |
|                             | 12.81)       | 13.08)       | 0.06)         |        | 18.60)        | 19.50)        | 0.20)       |        | 40.21)        | 53.27)         | (0.66,  |        | (0.31, | (0.33, | 1.15)        |        |
| High-income Asia Pacific    | 3.61 (0.76,  | 3.50 (0.72,  | -0.11 (-0.14, | <0.001 | 11.85 (8.12,  | 11.63 (8.13,  | -0.06       | 0.002  | 198.16        | 19.91 (16.32,  | -7.64   | <0.001 | 2.77   | 0.28   | -7.64        | <0.001 |
|                             | 8.00)        | 7.76)        | -0.08)        |        | 16.31)        | 16.08)        | (-0.10,     |        | (96.75,       | 22.93)         | (-8.11, |        | (1.35, | (0.23, | (-8.12,      |        |
| Central Europe              | 4.33 (1.06,  | 4.17 (1.02,  | -0.13 (-0.17, | <0.001 | 19.37 (14.23, | 18.17 (13.25, | -0.22       | <0.001 | 73.66 (67.57, | 32.39 (25.71,  | -2.85   | <0.001 | 1.03   | 0.45   | -2.85        | <0.001 |
|                             | 9.20)        | 8.86)        | -0.09)        |        | 25.47)        | 24.15)        | (-0.25,     |        | 80.53)        | 40.78)         | (-3.68, |        | (0.95, | (0.36, | (-3.68,      |        |
| Andean Latin America        | 2.85 (0.48,  | 2.90 (0.56,  | 0.06 (0.02,   | 0.004  | 7.66 (4.98,   | 8.40 (5.54,   | 0.32 (0.30, | <0.001 | 202.78        | 130.58 (91.17, | -1.45   | <0.001 | 2.84   | 1.83   | -1.44        | <0.001 |
|                             | 6.84)        | 6.84)        | 0.11)         |        | 10.83)        | 11.68)        | 0.34)       |        | (151.81,      | 179.91)        | (-1.95, |        | (2.12, | (1.28, | (-1.95,      |        |
| Caribbean                   | 11.80 (5.19, | 12.67 (5.66, | 0.26 (0.21,   | <0.001 | 25.74 (18.70, | 26.29 (19.08, | 0.07 (0.05, | <0.001 | 91.19 (73.98, | 72.90 (47.70,  | -0.70   | <0.001 | 1.28   | 1.02   | -0.69        | <0.001 |
|                             | 20.79)       | 22.16)       | 0.30)         |        | 34.32)        | 34.33)        | 0.09)       |        | 111.20)       | 109.26)        | (-1.07, |        | (1.03, | (0.67, | (-1.07,      |        |
| Southern Latin America      | 3.14 (0.64,  | 3.24 (0.49,  | 0.11 (0.07,   | <0.001 | 10.24 (7.02,  | 11.75 (8.30,  | 0.49 (0.44, | <0.001 | 105.70        | 54.54 (43.49,  | -2.31   | <0.001 | 1.48   | 0.76   | -2.31        | <0.001 |
|                             | 7.28)        | 7.48)        | 0.15)         |        | 13.83)        | 16.04)        | 0.55)       |        | (87.92,       | 67.10)         | (-2.68, |        | (1.23, | (0.61, | (-2.68,      |        |
| Oceania                     | 4.90 (1.03,  | 4.96 (0.85,  | 0.04 (0.01,   | 0.003  | 15.46 (10.94, | 15.77 (11.00, | 0.08 (0.06, | <0.001 | 69.83 (43.07, | 86.37 (51.59,  | 0.69    | <0.001 | 0.98   | 1.21   | 0.70 (0.36,  | <0.001 |
|                             | 10.36)       | 10.39)       | 0.06)         |        | 21.37)        | 22.11)        | 0.10)       |        | 115.38)       | 154.34)        | (0.36,  |        | (0.60, | (0.72, | 1.03)        |        |





|                             | 24.69)               | 24.28)               |                      |        |                      |                      | -0.01)               |        | 465.28)                 | 319.26)                 | -1.13)               |        | 6.97)             | 4.79)             | -1.14)               |        |
|-----------------------------|----------------------|----------------------|----------------------|--------|----------------------|----------------------|----------------------|--------|-------------------------|-------------------------|----------------------|--------|-------------------|-------------------|----------------------|--------|
| Western Sub-Saharan Africa  | 11.29 (6.48, 17.56)  | 12.07 (7.02, 18.59)  | 0.23 (0.21, 0.24)    | <0.001 | 22.56 (17.19, 29.09) | 23.43 (17.86, 30.22) | 0.14 (0.10, 0.19)    | <0.001 | 66.00 (47.05, 90.73)    | 65.25 (45.93, 90.36)    | -0.03 (-0.36, 0.29)  | 0.843  | 0.99 (0.70, 1.36) | 0.97 (0.68, 1.35) | -0.04 (-0.37, 0.30)  | 0.833  |
| Southeast Asia              | 9.28 (5.41, 15.05)   | 10.56 (6.35, 16.52)  | 0.45 (0.37, 0.53)    | <0.001 | 32.86 (24.14, 43.62) | 36.27 (26.52, 48.16) | 0.36 (0.26, 0.46)    | <0.001 | 179.58 (137.12, 238.39) | 156.09 (125.69, 187.71) | -0.47 (-0.78, -0.16) | 0.003  | 2.68 (2.05, 3.56) | 2.33 (1.87, 2.80) | -0.48 (-0.79, -0.16) | 0.003  |
| Eastern Sub-Saharan Africa  | 11.47 (6.54, 17.86)  | 11.89 (7.02, 18.66)  | 0.12 (0.10, 0.14)    | <0.001 | 21.27 (16.17, 27.34) | 21.65 (16.48, 27.90) | 0.06 (0.05, 0.08)    | <0.001 | 99.53 (69.80, 154.63)   | 72.92 (53.48, 96.10)    | -1.06 (-1.18, -0.94) | <0.001 | 1.49 (1.04, 2.32) | 1.09 (0.80, 1.44) | -1.07 (-1.19, -0.95) | <0.001 |
| Central Latin America       | 14.81 (9.13, 22.38)  | 12.71 (7.65, 19.81)  | -0.51 (-0.56, -0.46) | <0.001 | 37.53 (28.73, 47.61) | 33.05 (25.10, 42.66) | -0.44 (-0.45, -0.42) | <0.001 | 126.02 (116.39, 136.30) | 93.11 (76.26, 114.86)   | -0.86 (-1.39, -0.33) | 0.001  | 1.88 (1.74, 2.04) | 1.39 (1.14, 1.72) | -0.87 (-1.40, -0.33) | 0.002  |
| Tropical Latin America      | 9.81 (5.34, 15.98)   | 9.59 (5.13, 15.72)   | -0.07 (-0.17, 0.03)  | 0.192  | 24.67 (18.31, 32.55) | 25.06 (18.54, 33.17) | 0.06 (0.01, 0.10)    | 0.011  | 83.26 (75.67, 90.63)    | 56.01 (49.14, 62.85)    | -1.30 (-1.92, -0.68) | <0.001 | 1.24 (1.13, 1.36) | 0.83 (0.73, 0.94) | -1.31 (-1.94, -0.68) | <0.001 |
| Central Sub-Saharan Africa  | 14.18 (8.40, 21.63)  | 13.65 (8.40, 20.88)  | -0.14 (-0.16, -0.11) | <0.001 | 25.02 (18.82, 32.36) | 23.97 (18.17, 30.72) | -0.14 (-0.16, -0.12) | <0.001 | 62.12 (34.59, 103.32)   | 54.93 (31.53, 92.07)    | -0.40 (-0.51, -0.30) | <0.001 | 0.93 (0.51, 1.55) | 0.82 (0.46, 1.38) | -0.41 (-0.51, -0.30) | <0.001 |
| Western Europe              | 22.40 (14.96, 31.94) | 22.27 (15.25, 31.40) | -0.01 (-0.04, 0.03)  | 0.713  | 50.54 (39.28, 63.42) | 55.22 (43.27, 69.22) | 0.32 (0.25, 0.38)    | <0.001 | 37.55 (34.16, 41.31)    | 12.27 (10.87, 13.71)    | -3.82 (-4.20, -3.44) | <0.001 | 0.55 (0.50, 0.61) | 0.18 (0.16, 0.20) | -3.92 (-4.30, -3.52) | <0.001 |
| High-income North America   | 18.03 (10.93, 26.88) | 24.97 (17.12, 34.84) | 1.17 (0.94, 1.40)    | <0.001 | 38.41 (29.21, 49.53) | 51.74 (40.11, 65.02) | 1.04 (0.92, 1.17)    | <0.001 | 29.40 (26.60, 32.68)    | 28.61 (25.92, 31.27)    | -0.24 (-0.82, 0.33)  | 0.405  | 0.43 (0.39, 0.48) | 0.42 (0.38, 0.46) | -0.23 (-0.82, 0.37)  | 0.449  |
| Central Asia                | 19.65 (12.87, 28.27) | 19.01 (12.20, 27.43) | -0.11 (-0.13, -0.10) | <0.001 | 49.36 (39.21, 61.89) | 47.55 (37.16, 59.70) | -0.12 (-0.15, -0.08) | <0.001 | 197.95 (178.39, 217.12) | 242.35 (197.33, 296.30) | 0.76 (0.23, 1.28)    | 0.005  | 2.96 (2.67, 3.25) | 3.63 (2.96, 4.44) | 0.76 (0.24, 1.28)    | 0.004  |
| Eastern Europe              | 18.17 (11.82, 26.77) | 19.41 (12.51, 28.21) | 0.22 (0.19, 0.25)    | <0.001 | 49.08 (38.16, 62.49) | 54.07 (41.98, 68.80) | 0.36 (0.29, 0.42)    | <0.001 | 59.64 (54.42, 64.47)    | 69.09 (55.31, 85.16)    | 0.65 (-0.45, 1.75)   | 0.248  | 0.89 (0.81, 0.96) | 1.03 (0.82, 1.27) | 0.66 (-0.45, 1.77)   | 0.244  |
| Southern Sub-Saharan Africa | 16.59 (10.32, 23.11) | 15.10 (9.36, 23.11)  | -0.33 (-0.38, -0.29) | <0.001 | 27.67 (21.08, 35.47) | 24.92 (18.96, 32.14) | -0.35 (-0.40, -0.30) | <0.001 | 68.18 (52.42, 87.26)    | 41.02 (25.85, 60.08)    | -1.62 (-3.35, -0.09) | 0.073  | 1.02 (0.78, 1.26) | 0.61 (0.38, 0.84) | -1.64 (-3.40, -0.09) | 0.073  |

|                          | SDI (2019)           |                      |                      |        | SDI (2020)           |                      |                      |        | Change (2019-2020)      |                         |                      |        |                   |                   |                      |        |
|--------------------------|----------------------|----------------------|----------------------|--------|----------------------|----------------------|----------------------|--------|-------------------------|-------------------------|----------------------|--------|-------------------|-------------------|----------------------|--------|
|                          | Mean                 | 95% CI               | 95% CI               | CI     | Mean                 | 95% CI               | 95% CI               | CI     | Mean                    | 95% CI                  | 95% CI               | CI     |                   |                   |                      |        |
|                          | 24.96)               |                      |                      |        |                      |                      |                      |        | -0.31)                  |                         |                      |        | 0.15)             | 1.31)             | 0.89)                | 0.16)  |
| High-income Asia Pacific | 13.63 (8.40, 20.46)  | 13.55 (8.48, 20.63)  | -0.01 (-0.05, 0.02)  | 0.478  | 36.88 (27.50, 48.01) | 39.48 (30.08, 51.59) | 0.26 (0.19, 0.34)    | <0.001 | 106.30 (85.65, 129.40)  | 13.40 (11.14, 15.68)    | -6.91 (-7.56, -6.25) | <0.001 | 1.59 (1.28, 1.94) | 0.19 (0.16, 0.23) | -7.02 (-7.67, -6.36) | <0.001 |
| Central Europe           | 12.05 (7.31, 18.58)  | 11.78 (7.07, 17.97)  | -0.08 (-0.13, -0.03) | 0.001  | 45.66 (35.57, 57.66) | 47.77 (36.99, 60.34) | 0.18 (0.06, 0.30)    | 0.004  | 71.29 (65.01, 77.69)    | 31.51 (25.29, 39.53)    | -3.00 (-3.73, -2.27) | <0.001 | 1.06 (0.96, 1.15) | 0.46 (0.37, 0.58) | -3.05 (-3.80, -2.30) | <0.001 |
| Andean Latin America     | 6.10 (2.76, 11.25)   | 6.09 (2.73, 11.04)   | 0.01 (-0.02, 0.03)   | 0.506  | 18.94 (13.64, 25.61) | 19.59 (13.99, 26.35) | 0.12 (0.11, 0.14)    | <0.001 | 193.94 (148.49, 251.62) | 88.41 (61.25, 120.97)   | -2.64 (-3.90, -1.36) | <0.001 | 2.91 (2.22, 3.77) | 1.32 (0.91, 1.81) | -2.65 (-3.91, -1.38) | <0.001 |
| Caribbean                | 37.76 (25.92, 50.32) | 38.57 (26.95, 51.29) | 0.07 (0.05, 0.10)    | <0.001 | 69.95 (56.35, 85.38) | 68.95 (55.62, 84.32) | -0.05 (-0.07, -0.02) | <0.001 | 144.10 (112.68, 186.50) | 156.94 (96.21, 228.91)  | 0.27 (-0.21, 0.75)   | 0.270  | 2.15 (1.68, 2.79) | 2.35 (1.44, 3.44) | 0.27 (-0.21, 0.76)   | 0.267  |
| Southern Latin America   | 10.44 (5.82, 16.47)  | 9.98 (5.68, 16.11)   | -0.15 (-0.19, -0.11) | <0.001 | 26.85 (20.14, 35.25) | 27.68 (20.78, 37.13) | 0.14 (0.06, 0.21)    | <0.001 | 95.36 (80.32, 111.49)   | 42.18 (34.46, 51.75)    | -2.70 (-3.26, -2.14) | <0.001 | 1.43 (1.20, 1.67) | 0.63 (0.51, 0.77) | -2.71 (-3.28, -2.14) | <0.001 |
| Oceania                  | 11.87 (6.68, 18.80)  | 12.07 (6.63, 18.82)  | 0.07 (0.02, 0.11)    | 0.003  | 40.19 (29.69, 53.22) | 40.79 (30.53, 53.86) | 0.07 (0.02, 0.13)    | 0.006  | 93.34 (54.18, 153.75)   | 126.13 (75.59, 201.30)  | 0.97 (0.70, 1.25)    | <0.001 | 1.38 (0.80, 2.30) | 1.88 (1.11, 3.00) | 0.98 (0.70, 1.26)    | <0.001 |
| Australasia              | 16.05 (9.67, 23.78)  | 13.32 (7.69, 20.77)  | -0.65 (-0.67, -0.64) | <0.001 | 41.48 (31.47, 53.59) | 39.06 (29.35, 51.03) | -0.19 (-0.24, -0.14) | <0.001 | 23.34 (18.60, 29.20)    | 8.23 (6.29, 10.55)      | -3.50 (-4.75, -2.24) | <0.001 | 0.34 (0.27, 0.43) | 0.12 (0.09, 0.15) | -3.57 (-4.86, -2.27) | <0.001 |
| <b>Men</b>               |                      |                      |                      |        |                      |                      |                      |        |                         |                         |                      |        |                   |                   |                      |        |
| Global                   | 15.92 (10.25, 23.54) | 16.75 (10.96, 24.70) | 0.18 (0.17, 0.19)    | <0.001 | 41.69 (32.24, 52.69) | 42.17 (32.91, 53.21) | 0.05 (0.03, 0.06)    | <0.001 | 254.79 (224.84, 282.25) | 263.67 (233.63, 307.58) | 0.14 (-0.07, 0.35)   | 0.197  | 3.81 (3.36, 4.22) | 3.95 (3.50, 4.60) | 0.14 (-0.07, 0.36)   | 0.181  |
| <b>SDI category</b>      |                      |                      |                      |        |                      |                      |                      |        |                         |                         |                      |        |                   |                   |                      |        |
| High                     | 18.43 (11.91, 27.27) | 19.45 (13.01, 28.07) | 0.18 (0.16, 0.20)    | <0.001 | 40.22 (30.90, 51.19) | 43.27 (33.95, 54.11) | 0.26 (0.19, 0.33)    | <0.001 | 106.75 (93.56, 115.64)  | 63.35 (57.02, 71.65)    | -1.77 (-2.14, -1.40) | <0.001 | 1.59 (1.38, 1.72) | 0.94 (0.84, 1.06) | -1.79 (-2.17, -1.40) | <0.001 |
| High-middle              | 14.94 (9.48, 22.35)  | 14.14 (8.88, 21.24)  | -0.19 (-0.22, -0.16) | <0.001 | 44.29 (33.62, 57.22) | 42.93 (32.73, 55.01) | -0.11 (-0.13, -0.10) | <0.001 | 247.77 (208.28, 283.68) | 210.13 (179.90, 246.39) | -0.66 (-1.02, -0.30) | <0.001 | 3.70 (3.10, 4.24) | 3.14 (2.68, 3.69) | -0.66 (-1.03, -0.30) | <0.001 |

|                              |              |              |               |        |               |               |              |        |          |                |         |        |        |        |              |        |
|------------------------------|--------------|--------------|---------------|--------|---------------|---------------|--------------|--------|----------|----------------|---------|--------|--------|--------|--------------|--------|
| Middle                       | 15.14 (9.63, | 16.09        | 0.22 (0.19,   | <0.001 | 44.39 (33.97, | 45.03 (34.75, | 0.05 (0.04,  | <0.001 | 288.83   | 332.10         | 0.52    | <0.001 | 4.32   | 4.97   | 0.52 (0.32,  | <0.001 |
|                              | 22.55)       | (10.45,      | 0.24)         |        | 56.91)        | 57.00)        | 0.06)        |        | (252.58, | (288.11,       | (0.31,  |        | (3.77, | (4.31, | 0.73)        |        |
| Low-middle                   | 15.84        | 16.72        | 0.19 (0.17,   | <0.001 | 37.72 (29.29, | 40.05 (31.19, | 0.21 (0.18,  | <0.001 | 323.97)  | 384.62)        | 0.72)   | 0.983  | 4.83)  | 5.76)  | -0.00        | 0.993  |
|                              | (10.15,      | (10.67,      | 0.21)         |        | 47.52)        | 50.64)        | 0.24)        |        | (269.91, | (266.62,       | (-0.58, |        | (4.04, | (3.99, | (-0.58,      |        |
| Low                          | 17.72        | 18.69        | 0.19 (0.18,   | <0.001 | 36.21 (28.55, | 38.96 (30.62, | 0.25 (0.19,  | <0.001 | 200.13   | 227.45         | 0.40    | 0.031  | 2.99   | 3.41   | 0.41 (0.04,  | 0.029  |
|                              | (11.41,      | (12.00,      | 0.20)         |        | 45.34)        | 48.49)        | 0.31)        |        | (157.73, | (180.68,       | (0.04,  |        | (2.36, | (2.70, | 0.77)        |        |
| <b>21 GBD region</b>         |              |              |               |        |               |               |              |        |          |                |         |        |        |        |              |        |
| South Asia                   | 15.90 (9.98, | 16.33        | 0.09 (0.06,   | <0.001 | 35.10 (26.90, | 37.97 (29.23, | 0.27 (0.25,  | <0.001 | 409.48   | 405.79         | -0.04   | 0.928  | 6.14   | 6.09   | -0.03        | 0.935  |
|                              | 23.97)       | (10.30,      | 0.12)         |        | 44.57)        | 48.37)        | 0.29)        |        | (337.29, | (334.39,       | (-0.83, |        | (5.05, | (5.02, | (-0.82,      |        |
| East Asia                    | 12.22 (7.23, | 11.45 (6.69, | -0.21 (-0.31, | <0.001 | 47.70 (35.16, | 48.14 (35.35, | 0.03 (-0.02, | 0.259  | 249.88   | 250.43         | 0.20    | 0.564  | 3.72   | 3.73   | 0.20 (-0.48, | 0.563  |
|                              | 18.75)       | 17.78)       | -0.12)        |        | 63.35)        | 65.15)        | 0.08)        |        | (187.57, | (199.79,       | (-0.48, |        | (2.79, | (2.97, | 0.90)        |        |
| North Africa and Middle East | 22.69        | 22.41        | -0.04 (-0.07, | 0.019  | 65.01 (52.08, | 66.78 (53.70, | 0.12 (0.06,  | <0.001 | 419.34   | 346.58         | -0.59   | <0.001 | 6.28   | 5.18   | -0.59        | <0.001 |
|                              | (15.05,      | (14.86,      | -0.01)        |        | 80.30)        | 82.44)        | 0.17)        |        | (339.06, | (253.13,       | (-0.89, |        | (5.07, | (3.79, | (-0.89,      |        |
| Western Sub-Saharan Africa   | 17.41        | 18.93        | 0.29 (0.27,   | <0.001 | 35.41 (28.00, | 38.23 (30.26, | 0.29 (0.19,  | <0.001 | 111.90   | 121.89 (86.82, | 0.30    | 0.035  | 1.67   | 1.82   | 0.30 (0.02,  | 0.036  |
|                              | (10.93,      | (12.18,      | 0.30)         |        | 44.39)        | 47.62)        | 0.39)        |        | (81.51,  | 167.02)        | (0.02,  |        | (1.21, | (1.29, | 0.58)        |        |
| Southeast Asia               | 13.66 (8.57, | 14.02 (8.85, | 0.09 (0.06,   | <0.001 | 39.50 (29.89, | 40.92 (31.07, | 0.12 (0.07,  | <0.001 | 219.93   | 323.74         | 1.39    | <0.001 | 3.29   | 4.84   | 1.40 (1.24,  | <0.001 |
|                              | 20.80)       | 21.27)       | 0.12)         |        | 51.03)        | 53.02)        | 0.18)        |        | (182.84, | (247.83,       | (1.23,  |        | (2.73, | (3.70, | 1.56)        |        |
| Eastern Sub-Saharan Africa   | 17.56        | 18.84        | 0.24 (0.22,   | <0.001 | 34.39 (27.18, | 37.22 (29.60, | 0.29 (0.22,  | <0.001 | 141.02   | 139.06         | -0.03   | 0.784  | 2.10   | 2.07   | -0.03        | 0.781  |
|                              | (10.94,      | (11.92,      | 0.27)         |        | 42.90)        | 46.29)        | 0.36)        |        | (105.67, | (102.89,       | (-0.25, |        | (1.57, | (1.53, | (-0.25,      |        |
| Central Latin America        | 17.35        | 16.53        | -0.16 (-0.18, | <0.001 | 32.71 (25.37, | 33.17 (25.38, | 0.05 (0.02,  | <0.001 | 218.48   | 213.89         | 0.19    | 0.344  | 3.27   | 3.20   | 0.19 (-0.21, | 0.347  |
|                              | (10.71,      | (10.11,      | -0.15)        |        | 41.54)        | 42.44)        | 0.07)        |        | (201.90, | (181.71,       | (-0.20, |        | (3.03, | (2.72, | 0.59)        |        |
| Tropical Latin America       | 13.85 (8.47, | 13.53 (8.38, | -0.08 (-0.12, | <0.001 | 34.45 (26.25, | 35.66 (27.10, | 0.11 (0.07,  | <0.001 | 167.93   | 158.09         | -0.23   | 0.198  | 2.51   | 2.36   | -0.24        | 0.193  |
|                              | 21.35)       | 20.87)       | -0.04)        |        | 44.31)        | 45.63)        | 0.15)        |        | (152.10, | (142.88,       | (-0.59, |        | (2.27, | (2.13, | (-0.59,      |        |

|                             |                         |                         |                      |        |                      |                      |                      |        |                            |                            |                      |        |              |              |                    |        |
|-----------------------------|-------------------------|-------------------------|----------------------|--------|----------------------|----------------------|----------------------|--------|----------------------------|----------------------------|----------------------|--------|--------------|--------------|--------------------|--------|
|                             |                         |                         |                      |        |                      |                      |                      |        | 182.23)                    | 175.59)                    | 0.12)                | 2.72)  | 2.62)        | 0.12)        |                    |        |
| Central Sub-Saharan Africa  | 20.47<br>(12.88, 29.76) | 19.90<br>(12.48, 29.23) | -0.09 (-0.12, -0.07) | <0.001 | 34.14 (26.78, 42.64) | 33.93 (26.45, 42.25) | -0.01 (-0.04, 0.01)  | 0.266  | (77.82, 192.68)            | 107.01 (64.86, 165.90)     | -0.58 (-0.68, -0.48) | <0.001 | (1.16, 2.89) | (0.97, 2.48) | (-0.68, -0.48)     | <0.001 |
| Western Europe              | 20.61<br>(13.24, 29.55) | 18.66<br>(12.40, 27.13) | -0.34 (-0.38, -0.30) | <0.001 | 41.33 (31.68, 52.71) | 41.01 (31.85, 51.62) | -0.03 (-0.09, 0.02)  | 0.244  | (104.42, 122.84)           | 36.11 (32.38, 40.57)       | -4.01 (-4.37, -3.65) | <0.001 | (1.56, 1.83) | (0.48, 0.60) | (-4.41, -3.68)     | <0.001 |
| High-income North America   | 18.21<br>(10.44, 27.73) | 22.24<br>(14.59, 31.41) | 0.69 (0.63, 0.74)    | <0.001 | 36.94 (28.42, 47.79) | 41.26 (31.70, 52.40) | 0.38 (0.24, 0.52)    | <0.001 | 64.76 (58.55, 69.79)       | 74.46 (68.10, 86.40)       | 0.54 (-0.33, 1.43)   | 0.225  | (0.86, 1.03) | (1.01, 1.28) | 0.57 (-0.32, 1.46) | 0.211  |
| Central Asia                | 20.85<br>(13.47, 29.93) | 19.73<br>(12.68, 28.40) | -0.18 (-0.21, -0.14) | <0.001 | 44.61 (35.20, 54.89) | 44.31 (34.95, 55.24) | -0.03 (-0.04, -0.02) | <0.001 | 250.13<br>(227.87, 273.05) | 348.76<br>(292.32, 409.35) | 1.16 (0.23, 2.09)    | 0.014  | (3.42, 4.09) | (4.39, 6.15) | 1.16 (0.23, 2.10)  | 0.014  |
| Eastern Europe              | 20.48<br>(13.12, 29.57) | 19.22<br>(12.10, 28.05) | -0.22 (-0.25, -0.20) | <0.001 | 36.92 (28.58, 46.99) | 34.82 (26.94, 44.83) | -0.21 (-0.24, -0.17) | <0.001 | 211.76<br>(193.89, 228.45) | 281.73<br>(232.83, 355.40) | 1.42 (-0.23, 3.10)   | 0.091  | (2.91, 3.43) | (3.50, 5.34) | 1.43 (-0.22, 3.10) | 0.090  |
| Southern Sub-Saharan Africa | 23.53<br>(15.13, 33.25) | 23.51<br>(15.47, 33.21) | 0.00 (-0.01, 0.02)   | 0.576  | 40.34 (31.95, 50.64) | 41.60 (32.81, 52.02) | 0.12 (0.07, 0.15)    | <0.001 | 57.61 (42.88, 78.22)       | 74.04 (55.89, 100.05)      | 0.82 (-0.07, 1.72)   | 0.073  | (0.63, 1.16) | (0.83, 1.49) | 0.83 (-0.08, 1.74) | 0.073  |
| High-income Asia Pacific    | 12.22 (7.36, 18.63)     | 11.35 (6.70, 17.32)     | -0.26 (-0.28, -0.24) | <0.001 | 28.18 (21.14, 36.98) | 26.61 (19.68, 35.11) | -0.20 (-0.22, -0.17) | <0.001 | 167.45<br>(121.97, 197.10) | 48.07 (40.13, 53.82)       | -4.22 (-4.93, -3.50) | <0.001 | (1.81, 2.95) | (0.59, 0.80) | (-4.97, -3.52)     | <0.001 |
| Central Europe              | 14.34 (9.00, 21.43)     | 13.47 (8.50, 20.28)     | -0.21 (-0.24, -0.17) | <0.001 | 45.33 (35.47, 56.80) | 42.37 (32.62, 53.61) | -0.23 (-0.25, -0.21) | <0.001 | 199.59<br>(186.30, 212.64) | 92.51 (76.66, 111.02)      | -2.78 (-3.38, -2.17) | <0.001 | (2.78, 3.18) | (1.14, 1.65) | (-3.40, -2.19)     | <0.001 |
| Andean Latin America        | 8.61 (4.20, 14.40)      | 8.76 (4.55, 14.55)      | 0.07 (0.05, 0.08)    | <0.001 | 22.35 (16.61, 29.42) | 23.89 (17.77, 31.22) | 0.23 (0.21, 0.25)    | <0.001 | 320.58<br>(242.71, 422.45) | 239.90<br>(169.98, 328.71) | -0.82 (-1.32, -0.33) | 0.001  | (3.64, 6.34) | (2.54, 4.93) | (-1.32, -0.33)     | 0.001  |
| Caribbean                   | 38.87<br>(26.85, 52.10) | 40.90<br>(28.61, 54.88) | 0.18 (0.17, 0.20)    | <0.001 | 70.47 (57.24, 85.62) | 71.94 (58.55, 86.78) | 0.06 (-0.00, 0.12)   | 0.057  | 201.81<br>(168.79, 239.03) | 173.21<br>(113.69, 255.37) | -0.51 (-0.97, -0.05) | 0.030  | (2.51, 3.58) | (1.70, 3.82) | (-0.98, -0.05)     | 0.030  |
| Southern Latin America      | 10.52 (6.06, 16.62)     | 10.53 (6.15, 16.75)     | 0.01 (-0.01, 0.02)   | 0.490  | 23.48 (17.57, 30.96) | 23.97 (18.07, 31.80) | 0.08 (0.04, 0.11)    | <0.001 | 181.23<br>(149.62, ...)    | 92.90 (75.44, 113.71)      | -2.31 (-2.65, ...)   | <0.001 | (2.71, 2.23) | (1.39, 1.12) | (-2.32, -2.66)     | <0.001 |

|                      |                     |                |                      |        |                         |                         |                     |        |                         |                         |                      |        |                   |                   |                      |        |
|----------------------|---------------------|----------------|----------------------|--------|-------------------------|-------------------------|---------------------|--------|-------------------------|-------------------------|----------------------|--------|-------------------|-------------------|----------------------|--------|
|                      |                     |                |                      |        |                         |                         |                     |        | 216.07)                 |                         | -1.98)               | 3.23)  | 1.70)             | -1.98)            |                      |        |
|                      |                     | 16.57          |                      |        |                         |                         |                     |        | 288.44                  | 338.93                  | 0.46                 |        | 4.31              | 5.07              |                      |        |
| Oceania              | 16.32 (9.67, 24.82) | (10.01, 24.54) | 0.04 (-0.01, 0.09)   | 0.158  | 47.09 (35.70, 61.66)    | 48.19 (36.16, 62.78)    | 0.08 (0.06, 0.09)   | <0.001 | (184.29, 465.82)        | (205.26, 547.23)        | (0.16, 0.75)         | 0.003  | (2.75, 6.97)      | (3.07, 8.20)      | 0.46 (0.16, 0.76)    | 0.003  |
|                      |                     | 41.24          |                      |        |                         |                         |                     |        |                         |                         |                      |        |                   |                   |                      |        |
| Australasia          | (28.20, 55.74)      | (27.52, 53.59) | -0.11 (-0.16, -0.07) | <0.001 | 69.57 (55.83, 85.41)    | 70.03 (56.53, 86.03)    | -0.05 (-0.39, 0.30) | 0.789  | 74.29 (60.82, 89.10)    | 26.78 (19.93, 34.68)    | -3.36 (-4.22, -2.50) | <0.001 | 1.10 (0.90, 1.33) | 0.39 (0.29, 0.51) | -3.40 (-4.27, -2.53) | <0.001 |
| <b>25-29 years</b>   |                     |                |                      |        |                         |                         |                     |        |                         |                         |                      |        |                   |                   |                      |        |
| <b>Women</b>         |                     |                |                      |        |                         |                         |                     |        |                         |                         |                      |        |                   |                   |                      |        |
|                      |                     | 22.53          |                      |        |                         |                         |                     |        |                         |                         |                      |        |                   |                   |                      |        |
| Global               | (13.76, 32.98)      | (14.26, 33.31) | 0.10 (0.06, 0.13)    | <0.001 | 109.16 (89.93, 130.93)  | 110.97 (91.52, 131.75)  | 0.05 (0.03, 0.08)   | <0.001 | (231.07, 297.86)        | (161.96, 212.96)        | (-1.75, -0.31)       | 0.005  | (3.71, 4.78)      | (2.58, 3.41)      | (-1.77, -0.30)       | 0.006  |
| <b>SDI category</b>  |                     |                |                      |        |                         |                         |                     |        |                         |                         |                      |        |                   |                   |                      |        |
|                      |                     | 32.73          |                      |        |                         |                         |                     |        |                         |                         |                      |        |                   |                   |                      |        |
| High                 | (20.08, 46.32)      | (22.98, 49.44) | 0.34 (0.27, 0.40)    | <0.001 | 121.39 (101.22, 142.28) | 139.91 (118.38, 162.71) | 0.49 (0.42, 0.55)   | <0.001 | 83.19 (76.10, 89.59)    | 48.87 (42.90, 56.52)    | -1.73 (-2.13, -1.33) | <0.001 | 1.31 (1.20, 1.41) | 0.76 (0.66, 0.88) | -1.78 (-2.19, -1.37) | <0.001 |
|                      |                     | 21.86          |                      |        |                         |                         |                     |        |                         |                         |                      |        |                   |                   |                      |        |
| High-middle          | (13.48, 32.00)      | (13.00, 31.08) | -0.09 (-0.13, -0.06) | <0.001 | 125.47 (102.65, 151.27) | 130.30 (106.76, 156.84) | 0.14 (0.12, 0.15)   | <0.001 | 181.40 (155.88, 212.56) | 103.82 (89.32, 119.37)  | -2.12 (-3.29, -0.92) | 0.001  | 2.88 (2.47, 3.39) | 1.62 (1.39, 1.88) | -2.19 (-3.42, -0.95) | 0.001  |
|                      |                     | 19.51          |                      |        |                         |                         |                     |        |                         |                         |                      |        |                   |                   |                      |        |
| Middle               | (11.78, 29.13)      | (12.74, 30.98) | 0.25 (0.22, 0.28)    | <0.001 | 111.22 (90.41, 135.95)  | 116.22 (95.11, 140.26)  | 0.15 (0.13, 0.17)   | <0.001 | 317.40 (278.68, 360.09) | 210.19 (179.59, 241.33) | -1.22 (-2.13, -0.31) | 0.009  | 5.09 (4.46, 5.77) | 3.35 (2.85, 3.86) | -1.24 (-2.16, -0.31) | 0.009  |
|                      |                     | 20.83          |                      |        |                         |                         |                     |        |                         |                         |                      |        |                   |                   |                      |        |
| Low-middle           | (12.47, 30.42)      | (12.97, 31.67) | 0.15 (0.14, 0.16)    | <0.001 | 91.87 (75.37, 110.24)   | 95.36 (78.26, 115.05)   | 0.13 (0.10, 0.15)   | <0.001 | 402.10 (330.03, 494.92) | 285.52 (232.92, 346.93) | -1.16 (-1.82, -0.50) | 0.001  | 6.48 (5.29, 7.99) | 4.60 (3.74, 5.59) | -1.17 (-1.83, -0.50) | 0.001  |
|                      |                     | 21.92          |                      |        |                         |                         |                     |        |                         |                         |                      |        |                   |                   |                      |        |
| Low                  | (13.27, 31.91)      | (13.75, 32.98) | 0.14 (0.13, 0.15)    | <0.001 | 77.47 (63.90, 92.70)    | 80.55 (66.74, 96.37)    | 0.14 (0.12, 0.15)   | <0.001 | 239.77 (179.55, 323.43) | 169.69 (134.99, 212.07) | -1.15 (-1.41, -0.90) | <0.001 | 3.86 (2.88, 5.21) | 2.73 (2.16, 3.42) | -1.16 (-1.42, -0.90) | <0.001 |
| <b>21 GBD region</b> |                     |                |                      |        |                         |                         |                     |        |                         |                         |                      |        |                   |                   |                      |        |
|                      |                     | 21.67          |                      |        |                         |                         |                     |        |                         |                         |                      |        |                   |                   |                      |        |
| South Asia           | (12.98, 31.51)      | (13.35, 32.23) | 0.09 (0.04, 0.14)    | <0.001 | 91.14 (74.19, 109.91)   | 95.73 (77.85, 115.80)   | 0.17 (0.13, 0.20)   | <0.001 | 486.78 (393.01, 594.50) | 348.84 (275.70, 435.66) | -1.07 (-2.11, -0.03) | 0.044  | 7.86 (6.34, 9.60) | 5.62 (4.44, 7.03) | -1.08 (-2.12, -0.02) | 0.045  |
|                      |                     | 15.33          |                      |        |                         |                         |                     |        |                         |                         |                      |        |                   |                   |                      |        |
| East Asia            | (8.75, 15.33)       | (9.63, 16.59)  | 0.27 (0.26, 0.27)    | <0.001 | 132.37                  | 151.52                  | 0.46 (0.45, 0.46)   | <0.001 | 228.27                  | 113.64 (86.82, 113.64)  | -2.15                | <0.001 | 3.62              | 1.74              | -2.26                | <0.001 |

|                              | Mean                | SD                   | CI                   | P      | Mean                   | SD                    | CI                   | P      | Mean                    | SD                      | CI                   | P      | Mean              | SD                | CI                   | P      |
|------------------------------|---------------------|----------------------|----------------------|--------|------------------------|-----------------------|----------------------|--------|-------------------------|-------------------------|----------------------|--------|-------------------|-------------------|----------------------|--------|
| North Africa and Middle East | 23.81               | 25.49                | 0.28                 |        | (102.01, 167.40)       | (117.92, 188.77)      | 0.48                 |        | (175.76, 295.06)        | 142.56                  | (-3.34, -0.95)       |        | (2.77, 4.71)      | (1.32, 2.21)      | (-3.50, -1.00)       |        |
|                              | 29.45               | 28.85                | -0.07 (-0.09, -0.05) | <0.001 | 143.00                 | 140.39                | -0.05                | 0.007  | 581.86                  | 322.76                  | -1.98                | <0.001 | 9.39              | 5.19              | -1.99                | <0.001 |
|                              | (17.59, 42.19)      | (17.27, 41.68)       |                      |        | (119.86, 167.07)       | (118.00, 163.66)      | (-0.08, -0.01)       |        | (489.71, 680.75)        | (248.44, 414.51)        | (-2.34, -1.62)       |        | (7.90, 11.00)     | (3.99, 6.68)      | (-2.35, -1.62)       | <0.001 |
|                              | 19.33               | 21.10                | 0.30 (0.28, 0.32)    | <0.001 | 65.04 (53.77, 77.65)   | 69.34 (57.48, 83.14)  | 0.23 (0.21, 0.25)    | <0.001 | 66.20 (47.22, 90.88)    | 53.71 (38.47, 72.02)    | -0.71 (-0.89, -0.53) | <0.001 | 1.06 (0.75, 1.46) | 0.85 (0.60, 1.15) | -0.73 (-0.92, -0.54) | <0.001 |
| Southeast Asia               | 14.78 (8.52, 23.10) | 17.06 (10.15, 25.78) | 0.50 (0.46, 0.55)    | <0.001 | 81.77 (66.25, 98.94)   | 92.05 (74.72, 110.55) | 0.43 (0.34, 0.52)    | <0.001 | 312.08 (248.94, 404.50) | 217.41 (176.35, 265.12) | -1.21 (-1.41, -1.01) | <0.001 | 5.02 (4.01, 6.52) | 3.49 (2.81, 4.27) | -1.22 (-1.42, -1.02) | <0.001 |
|                              | 19.73               | 20.63                | 0.15 (0.13, 0.16)    | <0.001 | 62.28 (51.44, 75.27)   | 64.24 (53.16, 77.33)  | 0.11 (0.07, 0.14)    | <0.001 | 122.09 (90.26, 197.17)  | 77.07 (56.43, 102.75)   | -1.56 (-1.74, -1.38) | <0.001 | 1.96 (1.44, 3.18) | 1.23 (0.89, 1.65) | -1.59 (-1.76, -1.41) | <0.001 |
| Central Latin America        | 24.92               | 21.58                | -0.49 (-0.50, -0.47) | <0.001 | 105.74 (87.52, 125.79) | 93.08 (76.68, 110.65) | -0.44 (-0.47, -0.41) | <0.001 | 188.77 (175.72, 201.92) | 122.45 (97.91, 151.66)  | -1.07 (-1.54, -0.60) | <0.001 | 3.02 (2.82, 3.23) | 1.95 (1.55, 2.42) | -1.08 (-1.56, -0.60) | <0.001 |
|                              | 15.76 (9.09, 24.38) | 15.11 (8.79, 23.18)  | -0.14 (-0.21, -0.07) | <0.001 | 66.73 (53.79, 82.00)   | 66.92 (54.53, 81.35)  | 0.00 (-0.02, 0.02)   | 0.700  | 167.65 (154.70, 180.10) | 77.79 (69.58, 85.80)    | -2.52 (-3.02, -2.02) | <0.001 | 2.70 (2.49, 2.90) | 1.24 (1.10, 1.37) | -2.56 (-3.06, -2.05) | <0.001 |
| Central Sub-Saharan Africa   | 24.69               | 23.72                | -0.14 (-0.16, -0.11) | <0.001 | 71.82 (58.96, 85.36)   | 69.35 (57.61, 83.01)  | -0.12 (-0.13, -0.11) | <0.001 | 116.65 (69.28, 185.30)  | 87.93 (53.05, 141.47)   | -0.97 (-1.16, -0.78) | <0.001 | 1.87 (1.11, 2.99) | 1.41 (0.84, 2.28) | -0.98 (-1.17, -0.78) | <0.001 |
|                              | 39.99               | 39.11                | -0.06 (-0.14, 0.01)  | 0.072  | 142.30                 | 152.69                | 0.25 (0.19, 0.32)    | <0.001 | 58.79 (54.82, 62.69)    | 19.84 (17.83, 21.90)    | -3.71 (-4.18, -3.24) | <0.001 | 0.92 (0.86, 0.98) | 0.30 (0.27, 0.33) | -3.84 (-4.37, -3.31) | <0.001 |
| High-income North America    | 33.19               | 44.83                | 1.09 (0.83, 1.36)    | <0.001 | 108.45 (88.24, 130.57) | 145.28                | 1.02 (0.87, 1.16)    | <0.001 | 64.65 (60.17, 68.42)    | 61.09 (55.49, 68.47)    | -0.13 (-0.61, 0.35)  | 0.592  | 1.00 (0.93, 1.05) | 0.95 (0.87, 1.07) | -0.11 (-0.67, 0.46)  | 0.709  |
|                              | 34.62               | 33.33                | -0.13 (-0.15, -0.11) | <0.001 | 138.16                 | 132.44                | -0.14 (-0.17, -0.11) | <0.001 | 270.81 (246.69, 293.90) | 314.76 (254.43, 384.94) | 0.60 (-0.07, 1.29)   | 0.080  | 4.36 (3.97, 4.74) | 5.08 (4.10, 6.23) | 0.61 (-0.07, 1.30)   | 0.078  |
| Eastern Europe               | 32.12               | 34.32                | 0.22 (0.19, 0.25)    | <0.001 | 133.17                 | 146.68                | 0.35 (0.25, 0.45)    | <0.001 | 95.41 (82.63, 112.59)   | 121.28 (92.65, 151.66)  | 0.92 (0.92, 0.92)    | 0.037  | 1.52              | 1.94              | 0.94 (0.06, 1.82)    | 0.036  |

|                             | 2019               | 2020               | 2021                 | 2022   | 2019                    | 2020                    | 2021                 | 2022   | 2019                    | 2020                   | 2021                 | 2022   | 2019              | 2020              | 2021                 | 2022   |
|-----------------------------|--------------------|--------------------|----------------------|--------|-------------------------|-------------------------|----------------------|--------|-------------------------|------------------------|----------------------|--------|-------------------|-------------------|----------------------|--------|
| Southern Sub-Saharan Africa | (19.52, 44.83)     | (21.12, 48.65)     | 0.25                 |        | (110.34, 158.46)        | (121.40, 173.47)        | 0.45                 |        | 105.77                  | 158.12                 | (0.05, 1.80)         |        | (1.30, 1.69)      | (1.47, 2.54)      | 1.83                 |        |
|                             | 29.73              | 26.86              |                      |        |                         |                         | -0.38                |        | 191.11                  |                        | -2.55                |        | 3.08              | 1.36              | -2.58                |        |
|                             | (17.70, 42.89)     | (15.99, 38.93)     | -0.34 (-0.39, -0.30) | <0.001 | 79.35 (64.30, 95.77)    | 70.97 (57.68, 85.79)    | (-0.42, -0.34)       | <0.001 | (149.14, 239.84)        | 85.13 (44.99, 136.43)  | (-4.53, -0.53)       | 0.014  | (2.39, 3.87)      | (0.71, 2.19)      | (-4.58, -0.53)       | 0.014  |
| High-income Asia Pacific    | 23.33              | 23.28              |                      |        |                         |                         |                      |        | 137.63                  |                        | -6.60                |        | 2.21              | 0.29              | -6.78                |        |
|                             | (14.65, 33.20)     | (14.74, 32.73)     | -0.01 (-0.04, 0.03)  | 0.665  | 94.35 (78.25, 111.34)   | 99.89 (82.87, 117.92)   | 0.21 (0.16, 0.27)    | <0.001 | (113.10, 161.32)        | 19.41 (16.03, 22.72)   | (-7.29, -5.91)       | <0.001 | (1.81, 2.59)      | (0.24, 0.35)      | (-7.50, -6.05)       | <0.001 |
| Central Europe              | 19.91              | 19.11              |                      |        |                         |                         |                      |        | 120.61                  |                        | -2.93                |        | 1.91              | 0.76              | -3.00                |        |
|                             | (11.95, 29.54)     | (11.72, 28.34)     | -0.14 (-0.19, -0.09) | <0.001 | 115.50 (95.67, 137.96)  | 116.38 (97.22, 138.78)  | 0.03 (-0.03, 0.10)   | 0.300  | (111.56, 129.80)        | 49.19 (39.76, 59.92)   | (-3.39, -2.46)       | <0.001 | (1.77, 2.06)      | (0.61, 0.94)      | (-3.49, -2.52)       | <0.001 |
| Andean Latin America        | 9.35 (4.51, 15.56) | 9.27 (4.44, 15.58) | -0.03 (-0.09, 0.03)  | 0.324  | 49.07 (39.82, 59.94)    | 50.40 (40.19, 62.23)    | 0.09 (0.06, 0.12)    | <0.001 | 270.00 (210.38, 345.28) | 104.94 (73.17, 146.94) | -3.35 (-4.06, -2.64) | <0.001 | 4.36 (3.40, 5.57) | 1.68 (1.16, 2.37) | -3.39 (-4.10, -2.66) | <0.001 |
|                             | 65.00              | 67.42              |                      |        |                         |                         |                      |        | 229.91                  | 223.54                 | -0.05                |        | 3.69              | 3.59              | -0.04                |        |
| Caribbean                   | (41.76, 89.79)     | (43.99, 93.68)     | 0.14 (0.12, 0.16)    | <0.001 | 200.47 (173.94, 229.26) | 196.45 (169.75, 224.32) | -0.07 (-0.07, -0.06) | <0.001 | (182.52, 303.09)        | (135.01, 335.22)       | (-0.65, 0.56)        | 0.880  | (2.92, 4.89)      | (2.15, 5.40)      | (-0.66, 0.57)        | 0.884  |
|                             | 18.06              | 17.07              |                      |        |                         |                         |                      |        | 128.21                  |                        | -3.52                |        | 2.06              | 0.73              | -3.55                |        |
| Southern Latin America      | (10.92, 26.41)     | (10.25, 25.09)     | -0.19 (-0.21, -0.17) | <0.001 | 69.04 (57.59, 81.64)    | 68.51 (57.27, 81.84)    | (-0.07, 0.03)        | 0.453  | (109.17, 150.66)        | 46.02 (36.22, 56.67)   | (-4.52, -2.50)       | <0.001 | (1.75, 2.43)      | (0.57, 0.90)      | (-4.57, -2.52)       | <0.001 |
|                             | 19.94              | 20.36              |                      |        |                         |                         |                      |        | 245.20                  | 292.93                 | 0.61                 |        | 3.92              | 4.70              |                      |        |
| Oceania                     | (11.33, 29.66)     | (11.69, 30.75)     | 0.08 (0.04, 0.11)    | <0.001 | 109.20 (87.12, 134.53)  | 110.67 (87.24, 137.02)  | 0.06 (-0.00, 0.12)   | 0.053  | (140.38, 407.27)        | (167.57, 497.64)       | (0.39, 0.83)         | <0.001 | (2.23, 6.56)      | (2.68, 7.98)      | 0.62 (0.40, 0.84)    | <0.001 |
|                             | 28.27              | 22.63              |                      |        |                         |                         |                      |        | 49.92                   | 17.28                  | -3.54                |        | 0.78              | 0.26              | -3.61                |        |
| Australasia                 | (17.00, 40.19)     | (13.52, 33.47)     | -0.78 (-0.80, -0.75) | <0.001 | 107.94 (89.89, 127.15)  | 95.12 (78.71, 113.44)   | (-0.49, -0.34)       | <0.001 | (49.92, 59.35)          | (17.28, 21.29)         | (-5.11, -1.94)       | <0.001 | (0.65, 0.94)      | (0.21, 0.33)      | (-5.25, -1.95)       | <0.001 |
|                             | <b>Men</b>         |                    |                      |        |                         |                         |                      |        |                         |                        |                      |        |                   |                   |                      |        |
| Global                      | 29.21              | 29.83              |                      |        |                         |                         |                      |        | 417.97                  | 417.19                 | 0.03                 |        | 6.71              | 6.71              |                      |        |
|                             | (17.49, 42.29)     | (18.06, 42.85)     | 0.07 (0.06, 0.09)    | <0.001 | (105.71, 157.43)        | (108.17, 158.96)        | 0.07 (0.06, 0.09)    | <0.001 | (381.47, 455.22)        | (374.27, 476.21)       | (-0.42, 0.49)        | 0.883  | (6.13, 7.31)      | (6.01, 7.66)      | 0.04 (-0.42, 0.50)   | 0.874  |
| <b>SDI category</b>         |                    |                    |                      |        |                         |                         |                      |        |                         |                        |                      |        |                   |                   |                      |        |
| High                        | 34.80              | 35.26              |                      |        |                         |                         |                      |        | 204.68                  | 128.28                 | -1.61                |        | 3.26              | 2.03              | -1.64                |        |
|                             | (20.32, 42.29)     | (21.57, 42.85)     | 0.04 (0.01, 0.06)    | 0.003  | (100.41, 157.43)        | (106.05, 158.96)        | 0.13 (0.09, 0.16)    | <0.001 | (188.49, 455.22)        | (116.81, 476.21)       | (-1.90, 0.49)        | <0.001 | (2.99, 7.31)      | (1.84, 7.66)      | (-1.94, -1.64)       | <0.001 |

|                      |         |         |               |         |                |                |             |         |          |          |         |         |         |        |              |         |
|----------------------|---------|---------|---------------|---------|----------------|----------------|-------------|---------|----------|----------|---------|---------|---------|--------|--------------|---------|
|                      | 50.55)  | 49.59)  |               |         | 146.89)        | 148.49)        |             |         | 216.64)  | 145.07)  | -1.32)  | 3.46)   | 2.30)   | -1.34) |              |         |
|                      | 27.67)  | 25.17)  |               |         | 136.65)        | 134.46)        | -0.06)      |         | 426.01)  | 352.11)  | -0.66)  | 6.83)   | 5.64)   | -0.67) |              |         |
| High-middle          | (16.62, | (15.17, | -0.33 (-0.35, | <0.001) | (110.54,       | (108.52,       | (-0.10,     | <0.001) | (377.30, | (313.91, | (-1.26, | 0.032)  | (6.05,  | (5.01, | (-1.27,      | 0.032)  |
|                      | 39.70)  | 36.33)  | -0.30)        |         | 169.07)        | 164.19)        | -0.03)      |         | 470.94)  | 398.21)  | -0.06)  |         | 7.55)   | 6.37)  | -0.06)       |         |
|                      | 27.32)  | 28.66)  |               |         | 137.82)        | 141.11)        |             |         | 470.59)  | 487.72)  | 0.12)   |         | 7.56)   | 7.84)  |              |         |
| Middle               | (16.42, | (17.33, | 0.17 (0.14,   | <0.001) | (111.77,       | (115.50,       | 0.08 (0.07, | <0.001) | (426.68, | (429.03, | (-0.39, | 0.636)  | (6.83,  | (6.89, | 0.13 (-0.40, | 0.634)  |
|                      | 39.68)  | 41.32)  | 0.19)         |         | 169.30)        | 171.95)        | 0.10)       |         | 515.75)  | 551.22)  | 0.65)   |         | 8.31)   | 8.88)  | 0.66)        |         |
|                      | 28.62)  | 30.02)  |               |         | 116.59 (95.55, | 123.88)        | 0.20 (0.18, |         | 524.54)  | 532.36)  | 0.08)   |         | 8.46)   | 8.59)  | 0.08 (-0.60, | 0.819)  |
| Low-middle           | (17.12, | (17.93, | 0.17 (0.15,   | <0.001) | 140.66)        | (101.64,       | 0.22)       | <0.001) | (446.16, | (449.70, | (-0.60, | 0.823)  | (7.20,  | (7.24, | 0.77)        |         |
|                      | 41.15)  | 42.88)  | 0.19)         |         | 114.49 (94.26, | 124.32)        | 0.29 (0.26, | <0.001) | (261.61, | (307.01, | (0.22,  | 0.001)  | (4.20,  | (4.93, | 0.55 (0.22,  | 0.001)  |
| Low                  | (19.30, | (20.63, | 0.21 (0.19,   | <0.001) | 136.48)        | 148.12)        | 0.32)       |         | 404.00)  | 461.83)  | 0.88)   |         | 6.52)   | 7.44)  | 0.88)        |         |
|                      | 45.53)  | 48.19)  | 0.22)         |         |                |                |             |         |          |          |         |         |         |        |              |         |
| <b>21 GBD region</b> |         |         |               |         |                |                |             |         |          |          |         |         |         |        |              |         |
|                      | 28.80)  | 29.60)  |               |         | 108.91 (88.32, | 116.63 (94.87, | 0.23 (0.19, | <0.001) | 635.23)  | 662.08)  | 0.13)   |         | 10.27)  | 10.71) | 0.13 (-0.74, | 0.765)  |
| South Asia           | (17.10, | (17.54, | 0.10 (0.08,   | <0.001) | 131.88)        | 140.84)        | 0.28)       |         | (531.01, | (559.00, | (-0.74, | 0.769)  | (8.58,  | (9.05, | 1.01)        |         |
|                      | 41.32)  | 41.98)  | 0.12)         |         |                |                |             |         | 755.27)  | 789.82)  | 1.01)   |         | 12.20)  | 12.78) |              |         |
|                      | 21.73)  | 20.28)  |               |         | 152.59)        | 152.18)        | -0.00)      |         | 333.15)  | 335.10)  | 0.04)   |         | 5.30)   | 5.32)  |              |         |
| East Asia            | (12.63, | (11.80, | -0.23 (-0.31, | <0.001) | (117.95,       | (116.04,       | (-0.08,     | 0.899)  | (264.81, | (278.66, | (-0.52, | 0.877)  | (4.19,  | (4.38, | 0.04 (-0.54, | 0.888)  |
|                      | 32.14)  | 30.02)  | -0.15)        |         | 193.04)        | 194.29)        | 0.07)       |         | 390.14)  | 398.72)  | 0.61)   |         | 6.24)   | 6.35)  | 0.62)        |         |
|                      | 41.17)  | 41.11)  |               |         | 196.18)        | 201.67)        |             |         | 779.14)  | 504.91)  | -1.44)  |         | 12.56)  | 8.11)  | -1.45)       |         |
| North Africa and     | (24.85, | (24.97, | 0.00 (-0.03,  | 0.983)  | (165.16,       | (171.38,       | 0.11 (0.02, | 0.013)  | (647.04, | (382.91, | (-1.78, | <0.001) | (10.45, | (6.15, | (-1.79,      | <0.001) |
| Middle East          | 58.15)  | 58.00)  | 0.03)         |         | 229.03)        | 234.85)        | 0.20)       |         | 942.34)  | 679.42)  | -1.10)  |         | 15.22)  | 10.95) | -1.11)       |         |
|                      | 31.29)  | 34.13)  |               |         | 113.62 (94.08, | 124.61)        | 0.34 (0.28, | <0.001) | 136.15)  | 149.40)  | 0.31)   |         | 2.17)   | 2.38)  | 0.31 (0.03,  | 0.031)  |
| Western              | (19.05, | (20.41, | 0.30 (0.28,   | <0.001) | 135.89)        | 149.55)        | 0.39)       |         | (99.58,  | (108.33, | (0.04,  | 0.027)  | (1.58,  | (1.72, | 0.59)        |         |
| Sub-Saharan Africa   | 44.44)  | 48.48)  | 0.31)         |         |                |                |             |         | 182.58)  | 198.02)  | 0.59)   |         | 2.91)   | 3.17)  |              |         |
|                      | 23.88)  | 24.76)  |               |         | 116.05 (94.11, | 122.41 (98.68, | 0.19 (0.16, | <0.001) | 485.80)  | 579.31)  | 0.63)   |         | 7.81)   | 9.33)  | 0.63 (0.32,  | <0.001) |
| Southeast Asia       | (14.03, | (14.63, | 0.13 (0.10,   | <0.001) | 143.02)        | 150.76)        | 0.22)       |         | (407.14, | (431.32, | (0.32,  | <0.001) | (6.54,  | (6.93, | 0.95)        |         |
|                      | 35.09)  | 36.39)  | 0.15)         |         |                |                |             |         | 567.88)  | 685.67)  | 0.95)   |         | 9.15)   | 11.05) |              |         |
|                      | 31.66)  | 34.19)  |               |         | 113.21 (91.94, | 123.13)        | 0.30 (0.27, | <0.001) | 234.19)  | 238.59)  | 0.05)   |         | 3.75)   | 3.82)  | 0.05 (-0.19, | 0.680)  |
| Eastern Sub-Saharan  | (19.29, | (20.70, | 0.27 (0.23,   | <0.001) | 135.90)        | (100.46,       | 0.33)       | <0.001) | (187.77, | (176.99, | (-0.18, | 0.661)  | (3.00,  | (2.83, | 0.29)        |         |
| Africa               | 45.37)  | 48.56)  | 0.31)         |         |                |                |             |         | 283.72)  | 310.33)  | 0.29)   |         | 4.57)   | 4.99)  |              |         |
| Central Latin        | 31.16)  | 29.46)  | -0.19 (-0.20, | <0.001) | 100.43 (82.90, | 101.63 (83.49, | 0.04 (0.02, | 0.001)  | 368.35)  | 340.88)  | -0.09)  | 0.599)  | 5.93)   | 5.48)  | -0.10)       | 0.595)  |



|                             |              |              |               |        |                |                |              |        |          |               |         |        |        |        |              |        |
|-----------------------------|--------------|--------------|---------------|--------|----------------|----------------|--------------|--------|----------|---------------|---------|--------|--------|--------|--------------|--------|
| America                     | (18.70,      | (17.77,      | -0.17)        |        | 121.05)        | 122.23)        | 0.06)        |        | (347.35, | (296.41,      | (-0.44, |        | (5.59, | (4.77, | (-0.45,      |        |
|                             | 44.61)       | 42.65)       |               |        |                |                |              |        | 390.49)  | 392.70)       | 0.26)   |        | 6.30)  | 6.32)  | 0.26)        |        |
| Tropical Latin America      | 24.65        | 23.71        |               |        |                |                |              |        | 372.06   | 241.73        | -1.45   |        | 5.97   | 3.86   | -1.47        |        |
|                             | (14.60,      | (14.26,      | -0.13 (-0.20, | <0.001 | 113.48 (89.21, | 116.32 (92.24, | 0.08 (0.04,  | <0.001 | (342.27, | (221.43,      | (-1.83, | <0.001 | (5.49, | (3.54, | (-1.86,      | <0.001 |
| Central Sub-Saharan Africa  | 35.79)       | 34.63)       | -0.06)        |        | 143.55)        | 146.36)        | 0.12)        |        | 402.46)  | 264.59)       | -1.05)  |        | 6.46)  | 4.22)  | -1.07)       |        |
|                             | 37.00        | 35.94        |               |        |                |                |              |        | 236.51   | 199.19        | -0.61   |        | 3.80   | 3.20   | -0.61        |        |
| Western Europe              | (22.39,      | (21.76,      | -0.10 (-0.12, | <0.001 | 108.63 (90.63, | 107.56 (90.61, | (-0.04,      | <0.001 | (150.48, | (123.86,      | (-0.68, | <0.001 | (2.41, | (1.98, | (-0.68,      | <0.001 |
|                             | 52.62)       | 50.97)       | -0.07)        |        | 128.43)        | 128.38)        | -0.03)       |        | 366.28)  | 300.16)       | -0.54)  |        | 5.91)  | 4.83)  | -0.54)       |        |
| High-income North America   | 38.22        | 33.35        |               |        | 126.61         | 119.35 (99.35, | -0.20)       |        | 210.88   | 82.83 (77.55, | -3.24   |        | 3.37   | 1.31   | -3.27        |        |
|                             | (23.15,      | (20.08,      | -0.48 (-0.52, | <0.001 | (103.44,       | 139.19)        | (-0.25,      | <0.001 | (197.75, | 89.52)        | (-3.52, | <0.001 | (3.16, | (1.23, | (-3.57,      | <0.001 |
| Central Asia                | 54.64)       | 47.07)       | -0.44)        |        | 149.83)        |                | -0.14)       |        | 222.49)  |               | -2.95)  |        | 3.56)  | 1.42)  | -2.98)       |        |
|                             | 35.69        | 41.56        |               |        |                |                |              |        | 165.79   | 144.86        | -0.46   |        | 2.62   | 2.29   | -0.46        |        |
| Eastern Europe              | (19.29,      | (25.80,      | 0.52 (0.48,   | <0.001 | 113.00 (90.31, | 121.02 (99.25, | 0.27 (0.07,  | 0.009  | (153.41, | (132.24,      | (-0.97, | 0.077  | (2.42, | (2.09, | (-0.98,      | 0.083  |
|                             | 55.34)       | 59.18)       | 0.56)         |        | 137.77)        | 147.52)        | 0.47)        |        | 175.95)  | 163.51)       | 0.05)   |        | 2.79)  | 2.59)  | 0.06)        |        |
| Southern Sub-Saharan Africa | 38.55        | 36.85        |               |        | 139.58         | 138.20         | -0.04        |        | 519.11   | 591.35        | 0.46    |        | 8.38   | 9.56   |              |        |
|                             | (23.14,      | (21.69,      | -0.14 (-0.17, | <0.001 | (118.10,       | (116.55,       | (-0.05,      | <0.001 | (478.37, | (510.71,      | (-0.15, | 0.139  | (7.72, | (8.26, | 0.46 (-0.15, | 0.137  |
| High-income Asia Pacific    | 54.73)       | 52.32)       | -0.12)        |        | 163.59)        | 163.23)        | -0.03)       |        | 560.08)  | 677.12)       | 1.06)   |        | 9.05)  | 10.95) | 1.07)        |        |
|                             | 38.77        | 36.57        |               |        |                |                |              |        | 517.16   | 660.58        | 1.03    |        | 8.36   | 10.70  |              |        |
| Central Europe              | (23.05,      | (21.54,      | -0.20 (-0.24, | <0.001 | 112.68 (91.47, | 108.60 (87.87, | (-0.17,      | <0.001 | (455.47, | (560.34,      | (-0.60, | 0.217  | (7.37, | (9.07, | 1.04 (-0.59, | 0.214  |
|                             | 55.54)       | 52.95)       | -0.16)        |        | 135.90)        | 131.33)        | -0.09)       |        | 559.38)  | 839.09)       | 2.69)   |        | 9.05)  | 13.61) | 2.70)        |        |
| Andean Latin America        | 44.14        | 43.66        |               |        | 130.30         | 132.92         |              |        | 163.10   | 147.70        | -0.39   |        | 2.60   | 2.35   | -0.40        |        |
|                             | (26.84,      | (26.85,      | -0.03 (-0.05, | <0.001 | (105.40,       | (108.70,       | 0.07 (0.03,  | 0.001  | (123.32, | (114.18,      | (-1.11, | 0.296  | (1.95, | (1.82, | (-1.13,      | 0.287  |
| Caribbean                   | 62.28)       | 61.71)       | -0.02)        |        | 158.05)        | 159.72)        | 0.12)        |        | 213.88)  | 189.72)       | 0.34)   |        | 3.42)  | 3.03)  | 0.34)        |        |
|                             | 22.20        | 20.11        |               |        |                |                |              |        | 269.51   | 85.55 (72.80, | -3.89   |        | 4.33   | 1.35   | -3.94        |        |
| High-income Asia Pacific    | (13.15,      | (11.82,      | -0.34 (-0.37, | <0.001 | 81.91 (66.17,  | 75.03 (61.12,  | (-0.34,      | <0.001 | (214.96, | 96.48)        | (-4.23, | <0.001 | (3.44, | (1.15, | (-4.29,      | <0.001 |
|                             | 32.64)       | 29.84)       | -0.31)        |        | 98.97)         | 90.04)         | -0.25)       |        | 309.90)  |               | -3.54)  |        | 4.99)  | 1.53)  | -3.59)       |        |
| Central Europe              | 25.69        | 23.92        |               |        | 139.44         | 127.31         | -0.32        |        | 469.17   | 172.08        | -3.42   |        | 7.54   | 2.73   | -3.46        |        |
|                             | (14.94,      | (14.49,      | -0.26 (-0.29, | <0.001 | (112.40,       | (104.25,       | (-0.35,      | <0.001 | (446.98, | (148.86,      | (-4.00, | <0.001 | (7.19, | (2.35, | (-4.04,      | <0.001 |
| Andean Latin America        | 37.55)       | 34.48)       | -0.22)        |        | 172.78)        | 154.73)        | -0.28)       |        | 492.27)  | 197.29)       | -2.84)  |        | 7.90)  | 3.14)  | -2.87)       |        |
|                             | 14.47 (7.95, | 14.64 (8.14, | 0.05 (0.02,   | 0.002  | 67.73 (53.63,  | 71.88 (57.22,  | 0.20 (0.18,  | <0.001 | 398.73   | 284.86        | -1.17   |        | 6.42   | 4.58   | -1.18        |        |
| Caribbean                   | 22.89)       | 22.81)       | 0.08)         |        | 83.56)         | 88.61)         | 0.21)        |        | (307.46, | (210.89,      | (-1.76, | <0.001 | (4.94, | (3.38, | (-1.78,      | <0.001 |
|                             | 69.58        | 71.88        |               |        | 218.31         | 221.20         | 0.03 (-0.03, | 0.297  | 496.10)  | 381.58)       | -0.57)  |        | 8.01)  | 6.16)  | -0.58)       |        |
|                             |              |              |               |        |                |                |              | 408.75 | 320.26   | -0.81         | <0.001  | 6.57   | 5.14   | -0.82  | <0.001       |        |

|                        |                 |                 |                      |        |                      |                      |                   |        |                  |                        |                |        |               |               |                   |  |
|------------------------|-----------------|-----------------|----------------------|--------|----------------------|----------------------|-------------------|--------|------------------|------------------------|----------------|--------|---------------|---------------|-------------------|--|
|                        | (44.02, 96.61)  | (45.76, 100.58) | 0.15                 |        | (187.15, 252.72)     | (189.85, 253.15)     | 0.10              |        | (351.90, 469.61) | (229.51, 446.95)       | (-1.24, -0.39) |        | (5.65, 7.57)  | (3.66, 7.21)  | (-1.25, -0.39)    |  |
|                        | 18.96           | 18.66           |                      |        |                      |                      |                   |        | 262.96           | 147.37                 | -2.05          |        | 4.23          | 2.36          | -2.06             |  |
| Southern Latin America | (10.82, 28.32)  | (10.86, 28.28)  | -0.05 (-0.07, -0.04) | <0.001 | 67.43 (55.85, 80.79) | 66.67 (55.11, 80.07) |                   | 0.039  | (228.66, 299.78) | (121.62, 176.34)       | (-2.57, -1.52) | <0.001 | (3.68, 4.84)  | (1.95, 2.84)  | (-2.60, -1.53)    |  |
|                        | 29.39           | 29.87           |                      |        | 145.95               | 150.25               |                   |        | 644.82           | 744.32                 | 0.45           |        | 10.37         | 11.99         |                   |  |
| Oceania                | (17.14, 42.44)  | (17.45, 43.49)  | 0.06 (-0.01, 0.12)   | 0.075  | (114.35, 183.24)     | (116.88, 187.35)     | 0.10 (0.07, 0.12) | <0.001 | (436.66, 990.11) | (467.32, 1156.94)      | (0.21, 0.69)   | <0.001 | (6.99, 15.91) | (7.51, 18.70) | 0.46 (0.21, 0.70) |  |
|                        | 77.89           | 73.03           |                      |        | 220.13               | 221.12               |                   |        | 163.99           | 77.29 (61.95, 93.52)   | -2.50          |        | 2.61          | 1.23          | -2.52             |  |
| Australasia            | (48.27, 110.32) | (45.00, 104.33) | -0.20 (-0.28, -0.12) | <0.001 | (184.71, 257.43)     | (187.27, 258.74)     | (-0.38, 0.27)     | 0.736  | (141.45, 190.85) |                        | (-3.63, -1.36) | <0.001 | (2.25, 3.05)  | (0.98, 1.49)  | (-3.66, -1.36)    |  |
| <b>30-34 years</b>     |                 |                 |                      |        |                      |                      |                   |        |                  |                        |                |        |               |               |                   |  |
| <b>Women</b>           |                 |                 |                      |        |                      |                      |                   |        |                  |                        |                |        |               |               |                   |  |
|                        | 31.40           | 31.75           |                      |        | 232.06               | 242.08               |                   |        | 420.10           | 314.35                 | -0.94          |        | 7.31          | 5.44          | -0.96             |  |
| Global                 | (21.64, 41.71)  | (21.97, 41.78)  | 0.04 (0.02, 0.06)    | <0.001 | (190.28, 280.57)     | (199.26, 292.26)     | 0.15 (0.13, 0.17) | <0.001 | (377.28, 471.10) | (276.41, 354.53)       | (-1.41, -0.46) | <0.001 | (6.56, 8.19)  | (4.76, 6.13)  | (-1.43, -0.48)    |  |
| <b>SDI category</b>    |                 |                 |                      |        |                      |                      |                   |        |                  |                        |                |        |               |               |                   |  |
|                        | 39.92           | 40.00           |                      |        | 249.75               | 283.29               |                   |        | 144.37           | 107.32 (94.77, 122.55) | -0.97          |        | 2.46          | 1.81          | -1.00             |  |
| High                   | (27.35, 53.38)  | (26.97, 52.57)  | 0.02 (-0.04, 0.07)   | 0.568  | (209.87, 295.23)     | (240.78, 332.57)     | 0.44 (0.35, 0.53) | <0.001 | (135.76, 153.40) |                        | (-1.36, -0.58) | <0.001 | (2.31, 2.61)  | (1.59, 2.09)  | (-1.42, -0.58)    |  |
|                        | 29.71           | 28.94           |                      |        | 262.19               | 277.75               |                   |        | 301.23           | 190.88                 | -1.62          |        | 5.19          | 3.23          | -1.68             |  |
| High-middle            | (20.56, 39.47)  | (19.87, 38.53)  | -0.10 (-0.12, -0.08) | <0.001 | (214.61, 318.78)     | (225.09, 338.24)     | 0.20 (0.17, 0.24) | <0.001 | (267.65, 347.10) | (166.24, 218.30)       | (-2.50, -0.74) | <0.001 | (4.60, 5.99)  | (2.79, 3.71)  | (-2.61, -0.75)    |  |
|                        | 28.63           | 30.43           |                      |        | 235.02               | 252.78               |                   |        | 514.34           | 335.53                 | -1.50          |        | 8.96          | 5.80          | -1.53             |  |
| Middle                 | (19.82, 38.15)  | (21.04, 40.30)  | 0.21 (0.18, 0.24)    | <0.001 | (190.33, 286.52)     | (206.07, 307.71)     | 0.26 (0.23, 0.28) | <0.001 | (457.73, 575.53) | (289.45, 380.75)       | (-2.12, -0.87) | <0.001 | (7.96, 10.03) | (4.99, 6.59)  | (-2.16, -0.89)    |  |
|                        | 30.25           | 31.23           |                      |        | 199.64               | 208.86               |                   |        | 658.60           | 480.91                 | -1.09          |        | 11.54         | 8.41          | -1.09             |  |
| Low-middle             | (20.77, 40.46)  | (21.61, 41.36)  | 0.11 (0.10, 0.12)    | <0.001 | (162.97, 241.12)     | (171.44, 252.47)     | 0.16 (0.13, 0.18) | <0.001 | (553.16, 801.86) | (393.14, 570.49)       | (-1.54, -0.63) | <0.001 | (9.69, 14.07) | (6.82, 9.98)  | (-1.55, -0.64)    |  |
|                        | 31.68           | 32.98           |                      |        | 170.69               | 177.54               |                   |        | 434.33           | 345.73                 | -0.76          |        | 7.61          | 6.04          | -0.76             |  |
| Low                    | (21.89, 41.97)  | (22.99, 43.87)  | 0.14 (0.13, 0.14)    | <0.001 | (142.23, 203.85)     | (147.68, 211.21)     | 0.14 (0.12, 0.16) | <0.001 | (341.07, 559.94) | (279.89, 425.73)       | (-0.91, -0.60) | <0.001 | (5.96, 9.82)  | (4.87, 7.46)  | (-0.92, -0.61)    |  |
| <b>21 GBD region</b>   |                 |                 |                      |        |                      |                      |                   |        |                  |                        |                |        |               |               |                   |  |

|                              | 2019           | 2020           | Change (2020-2019)   | Significance | 2019             | 2020             | Change (2020-2019) | Significance | 2019              | 2020                 | Change (2020-2019) | Significance | 2019           | 2020          | Change (2020-2019) | Significance |
|------------------------------|----------------|----------------|----------------------|--------------|------------------|------------------|--------------------|--------------|-------------------|----------------------|--------------------|--------------|----------------|---------------|--------------------|--------------|
| South Asia                   | 31.64          | 32.35          | 0.08 (0.06, 0.10)    | <0.001       | 203.45           | 213.29           | 0.16 (0.12, 0.20)  | <0.001       | 760.13            | 577.78               | -0.97              | 0.009        | 13.33          | 10.12         | -0.98              | 0.008        |
|                              | (21.80, 42.15) | (22.33, 42.95) |                      |              | (165.42, 246.63) | (174.09, 258.92) |                    |              | (628.43, 917.62)  | (458.98, 705.09)     |                    |              | (10.99, 16.11) | (8.04, 12.37) |                    |              |
|                              | 23.28          | 25.05          | 0.25 (0.24, 0.26)    | <0.001       | 281.68           | 320.39           | 0.44 (0.42, 0.46)  | <0.001       | 346.34            | 185.40               | -2.03              | 0.022        | 5.92           | 3.05          | -2.17              | 0.017        |
| East Asia                    | (15.83, 31.55) | (17.17, 33.51) |                      |              | (215.25, 356.62) | (245.52, 400.26) |                    |              | (268.52, 439.66)  | (142.89, 231.17)     |                    |              | (4.60, 7.57)   | (2.33, 3.84)  |                    |              |
|                              | 46.62          | 46.24          | -0.03 (-0.05, -0.01) | <0.001       | 308.76           | 304.69           | -0.03              | 0.237        | 963.70            | 558.25               | -1.82              | <0.001       | 16.91          | 9.76          | -1.84              | <0.001       |
| North Africa and Middle East | (33.49, 60.89) | (33.05, 60.95) |                      |              | (261.63, 362.48) | (258.80, 358.30) |                    |              | (834.87, 1104.30) | (437.07, 695.43)     |                    |              | (14.61, 19.40) | (7.64, 12.18) |                    |              |
|                              | 27.94          | 30.36          | 0.29 (0.27, 0.30)    | <0.001       | 141.73           | 152.53           | 0.26 (0.24, 0.28)  | <0.001       | 221.36            | 184.26               | -0.62              | <0.001       | 3.87           | 3.21          | -0.64              | <0.001       |
| Western Sub-Saharan Africa   | (19.18, 37.21) | (20.93, 40.63) |                      |              | (117.96, 169.35) | (126.67, 182.11) |                    |              | (160.74, 295.06)  | (133.10, 246.81)     |                    |              | (2.80, 5.19)   | (2.31, 4.31)  |                    |              |
|                              | 22.06          | 23.89          | 0.28 (0.26, 0.31)    | <0.001       | 167.97           | 186.23           | 0.37 (0.33, 0.42)  | <0.001       | 534.46            | 364.10               | -1.29              | <0.001       | 9.35           | 6.34          | -1.31              | <0.001       |
| Southeast Asia               | (15.06, 30.37) | (16.36, 32.45) |                      |              | (137.69, 201.54) | (152.02, 224.46) |                    |              | (426.11, 681.07)  | (300.10, 439.98)     |                    |              | (7.46, 11.94)  | (5.20, 7.69)  |                    |              |
|                              | 28.51          | 29.65          | 0.13 (0.12, 0.14)    | <0.001       | 136.90           | 141.76           | 0.12 (0.10, 0.15)  | <0.001       | 197.85            | 139.01               | -1.20              | <0.001       | 3.44           | 2.40          | -1.23              | <0.001       |
| Eastern Sub-Saharan Africa   | (19.38, 37.85) | (20.31, 39.52) |                      |              | (112.92, 164.60) | (117.08, 170.13) |                    |              | (145.91, 295.36)  | (103.55, 182.44)     |                    |              | (2.53, 5.15)   | (1.77, 3.17)  |                    |              |
|                              | 31.98          | 27.78          | -0.48 (-0.49, -0.46) | <0.001       | 224.23           | 197.99           | -0.43              | <0.001       | 308.47            | 186.98               | -1.71              | <0.001       | 5.37           | 3.23          | -1.74              | <0.001       |
| Central Latin America        | (22.14, 42.37) | (18.88, 37.36) |                      |              | (186.29, 269.68) | (163.63, 238.05) |                    |              | (288.89, 326.90)  | (150.50, 232.40)     |                    |              | (5.01, 5.70)   | (2.59, 4.02)  |                    |              |
|                              | 19.03          | 17.11          | -0.36 (-0.48, -0.25) | <0.001       | 138.52           | 137.01           | -0.04              | 0.001        | 368.54            | 159.54               | -2.85              | <0.001       | 6.45           | 2.76          | -2.89              | <0.001       |
| Tropical Latin America       | (12.15, 26.82) | (10.61, 24.00) |                      |              | (111.88, 169.74) | (110.72, 166.92) |                    |              | (345.16, 392.53)  | (145.01, 173.94)     |                    |              | (6.05, 6.87)   | (2.51, 3.02)  |                    |              |
|                              | 35.04          | 33.72          | -0.13 (-0.14, -0.12) | <0.001       | 156.17           | 151.42           | -0.11              | <0.001       | 238.21            | 189.06               | -0.80              | <0.001       | 4.16           | 3.30          | -0.80              | <0.001       |
| Central Sub-Saharan Africa   | (24.58, 46.81) | (23.36, 45.86) |                      |              | (130.61, 184.71) | (126.56, 179.69) |                    |              | (143.18, 381.63)  | (115.76, 296.38)     |                    |              | (2.48, 6.69)   | (2.01, 5.21)  |                    |              |
|                              | 43.31          | 40.58          | -0.21 (-0.25, -0.17) | <0.001       | 289.33           | 305.43           | 0.20 (0.12, 0.28)  | <0.001       | 105.89            | 42.12 (38.67, 46.16) | -3.17              | <0.001       | 1.80           | 0.69          | -3.27              | <0.001       |
| Western Europe               | (28.98, 58.15) | (26.84, 54.40) |                      |              | (246.19, 340.03) | (262.43, 353.91) |                    |              | (98.29, 113.38)   |                      |                    |              | (1.67, 1.92)   | (0.64, 0.76)  |                    |              |
|                              | 45.67          | 49.71          | 0.32 (0.24, 0.39)    | <0.001       | 233.41           | 299.26           | 0.87 (0.70, 1.03)  | <0.001       | 140.60            | 136.74               | -0.04              | 0.907        | 2.37           | 2.33          | 0.01 (-0.54, 0.57) | 0.958        |
| High-income North America    | (30.96, 62.50) | (33.43, 65.61) |                      |              | (190.83, 281.78) | (244.80, 361.25) |                    |              | (132.01, 148.07)  | (126.12, 152.03)     |                    |              | (2.23, 2.48)   | (2.15, 2.59)  |                    |              |

|                             | 2019                | 2020                | Change (2020-2019)   | Significance | 2019                  | 2020                   | Change (2020-2019) | Significance | 2019             | 2020                   | Change (2020-2019) | Significance | 2019           | 2020           | Change (2020-2019)   | Significance |
|-----------------------------|---------------------|---------------------|----------------------|--------------|-----------------------|------------------------|--------------------|--------------|------------------|------------------------|--------------------|--------------|----------------|----------------|----------------------|--------------|
| Central Asia                | 44.25               | 42.70               | -0.12 (-0.13, -0.12) | <0.001       | 291.56                | 278.36                 | -0.15              |              | 490.58           | 527.22                 | 0.07               |              | 8.58           | 9.24           | 0.07 (-0.37, 0.52)   | 0.751        |
|                             | (31.18, 58.39)      | (29.57, 56.26)      |                      |              | (250.17, 336.27)      | (239.76, 321.46)       | (-0.18, -0.13)     | <0.001       | (455.54, 526.04) | (443.08, 633.29)       | (-0.38, 0.51)      | 0.772        | (7.96, 9.22)   | (7.78, 11.11)  |                      |              |
| Eastern Europe              | 41.38               | 44.31               | 0.23 (0.20, 0.26)    | <0.001       | 278.36                | 306.43                 | 0.35 (0.24, 0.46)  | <0.001       | 202.47           | 236.45                 | 0.66               |              | 3.51           | 4.10           | 0.66 (-0.05, 1.38)   | 0.068        |
|                             | (28.60, 54.64)      | (30.64, 58.13)      |                      |              | (229.65, 333.38)      | (252.51, 368.35)       |                    |              | (169.38, 224.29) | (182.89, 306.26)       | (-0.04, 1.36)      | 0.067        | (2.93, 3.88)   | (3.15, 5.34)   |                      |              |
| Southern Sub-Saharan Africa | 42.83               | 38.72               | -0.36 (-0.40, -0.31) | <0.001       | 174.11                | 155.77                 | -0.38              |              | 358.80           | 158.21 (94.00, 239.85) | -3.08              | 0.088        | 6.27           | 2.74           | -3.11 (-6.58, 0.49)  | 0.090        |
|                             | (30.20, 56.77)      | (27.24, 51.66)      |                      |              | (141.98, 210.06)      | (127.59, 188.83)       | (-0.42, -0.34)     | <0.001       | (285.45, 440.80) |                        | (-6.50, 0.47)      |              | (4.99, 7.72)   | (1.62, 4.19)   |                      |              |
| High-income Asia Pacific    | 25.65               | 24.87               | -0.09 (-0.14, -0.05) | <0.001       | 186.62                | 194.73                 | 0.16 (0.08, 0.24)  | <0.001       | 174.06           | 34.69 (30.28, 39.16)   | -5.46              | <0.001       | 3.02           | 0.57           | -5.62 (-8.85, -2.39) | <0.001       |
|                             | (16.73, 34.63)      | (16.06, 33.86)      |                      |              | (155.83, 221.47)      | (160.63, 232.12)       |                    |              | (146.25, 201.83) |                        | (-5.67, -5.24)     |              | (2.53, 3.51)   | (0.50, 0.65)   |                      |              |
| Central Europe              | 24.36               | 22.85               | -0.22 (-0.25, -0.20) | <0.001       | 232.76                | 229.52                 | -0.03              |              | 247.68           | 92.33 (76.10, 112.54)  | -3.38              | <0.001       | 4.27           | 1.54           | -3.49 (-6.72, -0.26) | <0.001       |
|                             | (16.01, 33.03)      | (15.13, 31.34)      |                      |              | (191.79, 282.10)      | (190.73, 275.48)       | (-0.07, 0.01)      | 0.101        | (232.98, 263.48) |                        | (-3.73, -3.04)     |              | (4.02, 4.52)   | (1.26, 1.87)   |                      |              |
| Andean Latin America        | 10.82 (5.84, 16.56) | 10.64 (5.57, 16.56) | -0.06 (-0.08, -0.03) | <0.001       | 99.94 (80.22, 122.80) | 102.26 (81.70, 125.48) | 0.08 (0.04, 0.13)  | <0.001       | 344.71           | 142.06                 | -3.12              | <0.001       | 6.04           | 2.46           | -3.17 (-6.40, 0.07)  | <0.001       |
|                             |                     |                     |                      |              |                       |                        |                    |              | (268.56, 437.93) | (101.73, 194.62)       | (-4.03, -2.21)     |              | (4.71, 7.67)   | (1.72, 3.40)   |                      |              |
| Caribbean                   | 81.86               | 84.27               | 0.11 (0.09, 0.12)    | <0.001       | 422.51                | 413.56                 | -0.07              |              | 453.98           | 381.86                 | -0.61              | 0.044        | 7.93           | 6.66           | -0.62 (-1.22, 0.00)  | 0.045        |
|                             | (57.83, 105.83)     | (59.62, 109.69)     |                      |              | (364.92, 483.30)      | (358.84, 472.78)       | (-0.08, -0.06)     | <0.001       | (368.80, 561.03) | (242.22, 557.53)       | (-1.21, -0.02)     |              | (6.43, 9.81)   | (4.22, 9.78)   |                      |              |
| Southern Latin America      | 20.53               | 18.80               | -0.30 (-0.32, -0.29) | <0.001       | 136.71                | 133.23                 | -0.09              |              | 203.36           | 80.51 (65.31, 97.19)   | -3.06              | <0.001       | 3.57           | 1.40           | -3.09 (-6.32, 0.15)  | <0.001       |
|                             | (13.32, 28.27)      | (11.98, 26.17)      |                      |              | (114.80, 159.95)      | (113.18, 156.76)       | (-0.12, -0.06)     | <0.001       | (170.71, 238.54) |                        | (-3.48, -2.64)     |              | (2.99, 4.18)   | (1.13, 1.70)   |                      |              |
| Oceania                     | 30.00               | 30.63               | 0.08 (0.06, 0.10)    | <0.001       | 235.42                | 238.64                 | 0.06 (0.00, 0.12)  | 0.035        | 542.53           | 641.44                 | 0.54               | <0.001       | 9.45           | 11.19          | 0.55 (0.39, 0.70)    | <0.001       |
|                             | (20.38, 40.66)      | (20.74, 41.83)      |                      |              | (187.52, 292.11)      | (188.85, 297.11)       |                    |              | (322.21, 883.81) | (400.61, 1048.27)      | (0.38, 0.69)       |              | (5.57, 15.38)  | (6.87, 18.34)  |                      |              |
| Australasia                 | 35.39               | 28.04               | -0.82 (-0.85, -0.79) | <0.001       | 220.35                | 188.38                 | -0.52              |              | 102.57           | 44.60 (36.10, 54.29)   | -2.83              | <0.001       | 1.75           | 0.75           | -2.84 (-6.07, 0.39)  | <0.001       |
|                             | (23.52, 47.02)      | (18.78, 38.67)      |                      |              | (187.21, 258.70)      | (158.48, 222.32)       | (-0.61, -0.44)     | <0.001       | (87.98, 118.50)  |                        | (-3.65, -1.99)     |              | (1.49, 2.03)   | (0.61, 0.92)   |                      |              |
| <b>Men</b>                  |                     |                     |                      |              |                       |                        |                    |              |                  |                        |                    |              |                |                |                      |              |
| Global                      | 46.90               | 45.69               | -0.09 (-0.12, -0.07) | <0.001       | 291.29                | 300.50                 | 0.11 (0.09, 0.13)  | <0.001       | 848.97           | 818.23                 | -0.13              | 0.324        | 14.84          | 14.30          | -0.13 (-0.40, 0.14)  | 0.325        |
|                             | (33.38, 58.39)      | (32.68, 56.26)      |                      |              | (237.27, 336.27)      | (246.34, 321.46)       |                    |              | (793.02, 883.81) | (741.26, 1048.27)      | (-0.39, 0.69)      |              | (13.85, 15.38) | (12.97, 18.34) |                      |              |

|                      | 61.50)  | 59.55)  |               |        | 350.72)  | 361.92)  |             |        | 909.35)   | 911.34)   | 0.13)   |        | 15.90)  | 15.96)  | 0.13)        |        |
|----------------------|---------|---------|---------------|--------|----------|----------|-------------|--------|-----------|-----------|---------|--------|---------|---------|--------------|--------|
| <b>SDI category</b>  |         |         |               |        |          |          |             |        |           |           |         |        |         |         |              |        |
|                      | 59.21   | 52.43   |               |        | 283.13   | 290.83   |             |        | 469.19    | 302.01    | -1.54   |        | 8.14    | 5.20    | -1.57        |        |
| High                 | (42.20, | (37.52, | -0.42 (-0.48, | <0.001 | (236.51, | (247.18, | 0.10 (0.02, | 0.017  | (447.17,  | (271.41,  | (-1.96, | <0.001 | (7.77,  | (4.68,  | (-2.00,      | <0.001 |
|                      | 78.46)  | 68.18)  | -0.36)        |        | 338.48)  | 340.29)  | 0.19)       |        | 490.06)   | 344.04)   | -1.13)  |        | 8.49)   | 5.96)   | -1.13)       |        |
|                      | 45.46   | 40.47   |               |        | 307.17   | 305.02   | -0.02       |        | 940.34    | 702.66    | -1.08   |        | 16.43   | 12.22   | -1.10        |        |
| High-middle          | (32.43, | (28.80, | -0.41 (-0.44, | <0.001 | (247.25, | (244.26, | (-0.05,     | 0.019  | (850.01,  | (634.35,  | (-1.40, | <0.001 | (14.85, | (11.00, | (-1.42,      | <0.001 |
|                      | 59.62)  | 53.11)  | -0.37)        |        | 377.42)  | 374.15)  | -0.00)      |        | 1013.50)  | 797.60)   | -0.76)  |        | 17.71)  | 13.92)  | -0.77)       |        |
|                      | 43.05   | 45.03   |               |        | 308.48   | 322.12   |             |        | 876.40    | 883.86    | 0.01    |        | 15.30   | 15.43   |              |        |
| Middle               | (30.64, | (32.14, | 0.16 (0.12,   | <0.001 | (248.26, | (260.89, | 0.15 (0.13, | <0.001 | (808.17,  | (794.81,  | (-0.23, | 0.936  | (14.06, | (13.88, | 0.01 (-0.24, | 0.945  |
|                      | 56.26)  | 58.81)  | 0.20)         |        | 376.31)  | 390.75)  | 0.17)       |        | 953.96)   | 989.31)   | 0.26)   |        | 16.69)  | 17.29)  | 0.26)        |        |
|                      | 43.88   | 45.64   |               |        | 262.02   | 279.67   |             |        | 1082.82   | 1144.24   | 0.23    |        | 19.01   | 20.10   |              |        |
| Low-middle           | (31.01, | (32.36, | 0.13 (0.12,   | <0.001 | (216.35, | (230.62, | 0.23 (0.21, | <0.001 | (942.58,  | (992.03,  | (-0.28, | 0.372  | (16.50, | (17.41, | 0.23 (-0.28, | 0.370  |
|                      | 57.45)  | 59.69)  | 0.15)         |        | 315.40)  | 336.57)  | 0.24)       |        | 1237.84)  | 1334.15)  | 0.74)   |        | 21.77)  | 23.47)  | 0.75)        |        |
|                      | 47.00   | 49.91   |               |        | 259.74   | 281.02   |             |        | 727.74    | 766.40    | 0.10    |        | 12.75   | 13.42   |              |        |
| Low                  | (33.26, | (35.40, | 0.20 (0.19,   | <0.001 | (215.16, | (233.30, | 0.28 (0.25, | <0.001 | (601.20,  | (638.11,  | (-0.06, | 0.225  | (10.53, | (11.16, | 0.10 (-0.07, | 0.236  |
|                      | 61.72)  | 65.60)  | 0.22)         |        | 309.47)  | 336.19)  | 0.31)       |        | 876.23)   | 916.52)   | 0.27)   |        | 15.37)  | 16.06)  | 0.27)        |        |
| <b>21 GBD region</b> |         |         |               |        |          |          |             |        |           |           |         |        |         |         |              |        |
|                      | 44.02   | 45.52   |               |        | 247.23   | 264.19   |             |        | 1323.46   | 1418.31   | 0.22    |        | 23.29   | 24.96   |              |        |
| South Asia           | (30.94, | (32.06, | 0.11 (0.09,   | <0.001 | (203.88, | (216.68, | 0.23 (0.19, | <0.001 | (1139.66, | (1205.77, | (-0.28, | 0.378  | (20.04, | (21.23, | 0.23 (-0.27, | 0.374  |
|                      | 57.58)  | 59.46)  | 0.13)         |        | 297.65)  | 317.92)  | 0.27)       |        | 1520.52)  | 1667.65)  | 0.73)   |        | 26.77)  | 29.38)  | 0.73)        |        |
|                      | 34.74   | 32.77   |               |        | 343.70   | 342.59   | -0.01       |        | 576.65    | 635.80    | 0.37    |        | 9.94    | 10.96   |              |        |
| East Asia            | (24.14, | (22.61, | -0.19 (-0.26, | <0.001 | (261.66, | (258.82, | (-0.06,     | 0.722  | (474.80,  | (523.06,  | (-0.24, | 0.235  | (8.11,  | (9.01,  | 0.37 (-0.26, | 0.249  |
|                      | 46.05)  | 43.68)  | -0.12)        |        | 435.80)  | 434.80)  | 0.04)       |        | 678.22)   | 754.50)   | 0.98)   |        | 11.66)  | 13.07)  | 1.00)        |        |
|                      | 66.91   | 68.16   |               |        | 440.39   | 456.24   |             |        | 1494.23   | 886.85    | -1.76   |        | 26.18   | 15.45   | -1.78        |        |
| North Africa and     | (48.81, | (49.73, | 0.06 (0.03,   | <0.001 | (372.91, | (387.83, | 0.15 (0.04, | 0.007  | (1294.23, | (717.73,  | (-1.90, | <0.001 | (22.71, | (12.50, | (-1.92,      | <0.001 |
| Middle East          | 85.79)  | 87.51)  | 0.09)         |        | 514.99)  | 535.69)  | 0.25)       |        | 1767.05)  | 1115.55)  | -1.63)  |        | 31.01)  | 19.51)  | -1.65)       |        |
|                      | 45.21   | 49.24   |               |        | 256.77   | 282.95   |             |        | 338.42    | 363.04    | 0.24    |        | 5.88    | 6.30    |              |        |
| Western              | (31.93, | (34.69, | 0.29 (0.26,   | <0.001 | (213.03, | (235.43, | 0.35 (0.30, | <0.001 | (253.33,  | (268.67,  | (-0.01, | 0.065  | (4.35,  | (4.64,  | 0.23 (-0.02, | 0.076  |
| Sub-Saharan Africa   | 59.41)  | 64.92)  | 0.32)         |        | 306.47)  | 339.29)  | 0.40)       |        | 454.95)   | 471.72)   | 0.49)   |        | 7.92)   | 8.24)   | 0.49)        |        |
|                      | 39.22   | 40.10   |               |        | 258.62   | 272.83   |             |        | 810.92    | 906.64    | 0.46    |        | 14.16   | 15.84   | 0.47 (0.09,  | 0.016  |
| Southeast Asia       | (27.65, | (28.49, | 0.08 (0.06,   | <0.001 | (207.04, | (218.63, | 0.19 (0.15, | <0.001 | (701.73,  | (736.60,  | (0.09,  | 0.016  | (12.24, | (12.81, | 0.85)        | 0.016  |
|                      |         |         | 0.10)         |        |          |          | 0.23)       |        |           |           |         |        |         |         |              |        |



|                        | 2019            | 2020            | Change (2020-2019)   | 95% CI | 2019             | 2020             | Change (2020-2019) | 95% CI | 2019               | 2020               | Change (2020-2019) | 95% CI | 2019           | 2020           | Change (2020-2019) | 95% CI |
|------------------------|-----------------|-----------------|----------------------|--------|------------------|------------------|--------------------|--------|--------------------|--------------------|--------------------|--------|----------------|----------------|--------------------|--------|
|                        | 54.54)          | 49.22)          |                      |        | 386.71)          | 346.28)          | -0.30)             |        | 1297.17)           | 434.33)            | -3.57)             |        | 22.74)         | 7.54)          | -3.61)             |        |
| Andean Latin America   | 19.22)          | 19.26)          | 0.01 (-0.07, 0.08)   | 0.853  | 149.74)          | 157.95)          | 0.18 (0.16, 0.20)  | <0.001 | 651.92)            | 447.45)            | -1.29)             | <0.001 | 11.43)         | 7.81)          | -1.30)             | <0.001 |
|                        | (12.46, 26.79)  | (12.35, 26.96)  |                      |        | (118.35, 185.41) | (125.16, 196.63) |                    |        | (521.17, 806.00)   | (334.77, 589.76)   |                    |        | (9.14, 14.16)  | (5.82, 10.29)  |                    |        |
| Caribbean              | 96.34)          | 99.39)          | 0.11 (0.08, 0.14)    | <0.001 | 483.76)          | 490.28)          | 0.04 (-0.00, 0.08) | 0.061  | 795.52)            | 642.43)            | -0.64)             | 0.001  | 13.90)         | 11.20)         | -0.64)             | 0.001  |
|                        | (68.97, 124.54) | (72.38, 128.02) |                      |        | (414.25, 560.74) | (418.56, 565.81) |                    |        | (698.28, 905.19)   | (468.48, 846.27)   |                    |        | (12.18, 15.82) | (8.13, 14.82)  |                    |        |
| Southern Latin America | 31.44)          | 29.53)          | -0.21 (-0.23, -0.20) | <0.001 | 152.40)          | 148.41)          | -0.10)             | <0.001 | 549.98)            | 277.31)            | -2.37)             | <0.001 | 9.67)          | 4.85)          | -2.38)             | <0.001 |
|                        | (21.67, 41.96)  | (20.23, 39.41)  |                      |        | (126.84, 181.37) | (125.16, 174.36) |                    |        | (487.82, 621.43)   | (234.13, 322.74)   |                    |        | (8.56, 10.92)  | (4.10, 5.65)   |                    |        |
| Oceania                | 46.00)          | 46.98)          | 0.07 (0.05, 0.09)    | <0.001 | 330.58)          | 341.78)          | 0.11 (0.09, 0.13)  | <0.001 | 1687.22)           | 1873.97)           | 0.35)              | <0.001 | 29.59)         | 32.88)         | 0.35 (0.17, 0.54)  | <0.001 |
|                        | (32.10, 60.78)  | (32.88, 62.81)  |                      |        | (257.87, 416.20) | (266.42, 430.59) |                    |        | (1193.49, 2434.94) | (1293.95, 2736.14) |                    |        | (20.85, 42.75) | (22.66, 48.07) |                    |        |
| Australasia            | 125.35)         | 113.65)         | -0.33 (-0.37, -0.30) | <0.001 | 513.32)          | 511.09)          | -0.08)             | 0.597  | 372.03)            | 200.15)            | -2.10)             | <0.001 | 6.46)          | 3.47)          | -2.11)             | <0.001 |
|                        | (93.78, 163.32) | (82.82, 147.20) |                      |        | (437.09, 594.22) | (439.79, 591.50) |                    |        | (336.52, 407.41)   | (166.94, 235.14)   |                    |        | (5.82, 7.07)   | (2.88, 4.08)   |                    |        |
| <b>35-39 years</b>     |                 |                 |                      |        |                  |                  |                    |        |                    |                    |                    |        |                |                |                    |        |
| <b>Women</b>           |                 |                 |                      |        |                  |                  |                    |        |                    |                    |                    |        |                |                |                    |        |
| Global                 | 38.44)          | 39.05)          | 0.05 (0.05, 0.06)    | <0.001 | 431.89)          | 437.33)          | 0.05 (0.00, 0.09)  | 0.048  | 621.74)            | 491.71)            | -0.79)             | <0.001 | 11.80)         | 9.31)          | -0.80)             | <0.001 |
|                        | (24.85, 57.45)  | (25.62, 57.41)  |                      |        | (355.38, 524.68) | (364.54, 526.80) |                    |        | (560.05, 691.92)   | (434.42, 550.46)   |                    |        | (10.63, 13.18) | (8.16, 10.40)  |                    |        |
| <b>SDI category</b>    |                 |                 |                      |        |                  |                  |                    |        |                    |                    |                    |        |                |                |                    |        |
| High                   | 39.82)          | 33.52)          | -0.59 (-0.63, -0.55) | <0.001 | 414.38)          | 440.76)          | 0.21 (0.14, 0.27)  | <0.001 | 242.66)            | 175.58)            | -1.14)             | <0.001 | 4.52)          | 3.26)          | -1.15)             | <0.001 |
|                        | (25.45, 60.20)  | (22.39, 48.79)  |                      |        | (353.90, 485.42) | (381.59, 513.27) |                    |        | (231.57, 253.63)   | (157.90, 198.65)   |                    |        | (4.33, 4.72)   | (2.93, 3.69)   |                    |        |
| High-middle            | 35.20)          | 34.71)          | -0.05 (-0.07, -0.03) | <0.001 | 477.56)          | 489.87)          | 0.09 (0.06, 0.12)  | <0.001 | 496.86)            | 308.94)            | -1.55)             | <0.001 | 9.35)          | 5.70)          | -1.61)             | <0.001 |
|                        | (22.76, 52.48)  | (22.85, 51.28)  |                      |        | (386.24, 587.89) | (398.46, 602.66) |                    |        | (443.19, 554.46)   | (275.28, 346.66)   |                    |        | (8.34, 10.48)  | (5.06, 6.43)   |                    |        |
| Middle                 | 38.25)          | 40.94)          | 0.24 (0.20, 0.29)    | <0.001 | 456.07)          | 464.38)          | 0.06 (0.03, 0.10)  | 0.001  | 726.59)            | 503.36)            | -1.20)             | <0.001 | 13.79)         | 9.49)          | -1.22)             | <0.001 |
|                        | (24.59, 57.26)  | (27.04, 60.19)  |                      |        | (367.28, 568.81) | (380.06, 570.57) |                    |        | (645.85, 817.59)   | (441.11, 567.26)   |                    |        | (12.25, 15.58) | (8.30, 10.71)  |                    |        |
| Low-middle             | 40.16)          | 41.13)          | 0.08 (0.06, 0.09)    | <0.001 | 387.39)          | 398.21)          | 0.10 (0.07, 0.12)  | <0.001 | 938.28)            | 776.19)            | -0.59)             | 0.002  | 17.97)         | 14.85)         | -0.59)             | 0.002  |
|                        | (26.11, 54.54)  | (26.90, 49.22)  |                      |        | (322.39, 386.71) | (331.97, 346.28) |                    |        | (794.37, 1297.17)  | (636.17, 434.33)   |                    |        | (15.23, 22.74) | (12.15, 7.54)  |                    |        |

|                      |         |              |               |        |          |          |             |        |           |          |         |        |         |         |         |        |
|----------------------|---------|--------------|---------------|--------|----------|----------|-------------|--------|-----------|----------|---------|--------|---------|---------|---------|--------|
|                      | 59.65)  | 60.62)       |               |        | 470.79)  | 482.97)  |             |        | 1119.16)  | 941.18)  | -0.21)  | 21.50) | 17.98)  | -0.22)  |         |        |
|                      | 42.17   | 43.42        |               |        | 332.08   | 342.06   |             |        | 714.09    | 585.90   | -0.71   | 13.68  | 11.21   | -0.72   |         |        |
| Low                  | (27.62, | (28.66,      | 0.10 (0.08,   | <0.001 | (280.84, | (289.21, | 0.11 (0.08, | <0.001 | (573.09,  | (470.72, | (-0.86, | <0.001 | (11.00, | (8.98,  | (-0.87, | <0.001 |
|                      | 62.35)  | 64.12)       | 0.12)         |        | 396.75)  | 410.69)  | 0.14)       |        | 910.98)   | 713.13)  | -0.56)  |        | 17.48)  | 13.66)  | -0.56)  |        |
| <b>21 GBD region</b> |         |              |               |        |          |          |             |        |           |          |         |        |         |         |         |        |
|                      | 42.40   | 43.25        |               |        | 395.42   | 413.65   |             |        | 1026.45   | 903.30   | -0.58   | 19.68  | 17.31   | -0.58   |         |        |
| South Asia           | (27.76, | (28.36,      | 0.06 (0.03,   | <0.001 | (328.35, | (341.11, | 0.15 (0.12, | <0.001 | (858.12,  | (725.20, | (-1.35, | 0.144  | (16.45, | (13.88, | (-1.35, | 0.143  |
|                      | 61.91)  | 63.62)       | 0.09)         |        | 480.41)  | 505.35)  | 0.18)       |        | 1237.72)  | 1114.04) | 0.20)   |        | 23.72)  | 21.37)  | 0.20)   |        |
|                      | 33.20   | 35.13        |               |        | 539.18   | 601.30   |             |        | 538.25    | 282.66   | -2.19   | 10.01  | 5.01    | -2.36   |         |        |
| East Asia            | (20.84, | (22.46,      | 0.19 (0.18,   | <0.001 | (407.48, | (455.94, | 0.37 (0.34, | <0.001 | (424.34,  | (220.50, | (-2.51, | <0.001 | (7.74,  | (3.82,  | (-2.70, | <0.001 |
|                      | 50.71)  | 52.25)       | 0.20)         |        | 702.34)  | 778.92)  | 0.39)       |        | 676.58)   | 350.69)  | -1.87)  |        | 12.73)  | 6.37)   | -2.02)  |        |
|                      | 68.28   | 67.69        |               |        | 586.51   | 578.09   |             |        | 1477.52   | 793.46   | -2.12   | 28.36  | 15.15   | -2.14   |         |        |
| North Africa and     | (45.40, | (44.92,      | -0.02 (-0.04, | 0.057  | (505.71, | (496.70, | (-0.11,     | 0.319  | (1287.28, | (616.86, | (-2.32, | <0.001 | (24.69, | (11.75, | (-2.34, | <0.001 |
| Middle East          | 101.70) | 101.43)      | 0.00)         |        | 688.39)  | 678.42)  | 0.04)       |        | 1723.36)  | 991.75)  | -1.92)  |        | 33.14)  | 19.02)  | -1.94)  |        |
|                      | 37.12   | 39.79        |               |        | 268.56   | 290.19   |             |        | 359.86    | 289.92   | -0.74   | 6.87   | 5.51    | -0.76   |         |        |
| Western              | (23.81, | (25.99,      | 0.24 (0.20,   | <0.001 | (227.55, | (245.70, | 0.28 (0.24, | <0.001 | (268.75,  | (215.82, | (-0.95, | <0.001 | (5.10,  | (4.07,  | (-0.97, | <0.001 |
| Sub-Saharan Africa   | 55.98)  | 58.68)       | 0.28)         |        | 320.94)  | 348.71)  | 0.32)       |        | 485.00)   | 396.75)  | -0.53)  |        | 9.30)   | 7.57)   | -0.55)  |        |
|                      | 31.22   | 31.37        |               |        | 316.40   | 339.07   |             |        | 758.83    | 562.82   | -1.01   | 14.51  | 10.71   | -1.03   |         |        |
| Southeast Asia       | (19.81, | (20.26,      | 0.02 (-0.02,  | 0.346  | (259.45, | (279.03, | 0.26 (0.17, | <0.001 | (621.45,  | (461.58, | (-1.12, | <0.001 | (11.88, | (8.71,  | (-1.13, | <0.001 |
|                      | 47.39)  | 46.73)       | 0.06)         |        | 385.06)  | 412.51)  | 0.34)       |        | 955.39)   | 692.26)  | -0.91)  |        | 18.35)  | 13.20)  | -0.93)  |        |
|                      | 37.70   | 39.02        |               |        | 262.88   | 273.75   |             |        | 371.22    | 261.83   | -1.20   | 7.06   | 4.94    | -1.23   |         |        |
| Eastern Sub-Saharan  | (24.23, | (24.93,      | 0.12 (0.10,   | <0.001 | (220.33, | (227.98, | 0.14 (0.12, | <0.001 | (278.93,  | (196.10, | (-1.30, | <0.001 | (5.27,  | (3.67,  | (-1.33, | <0.001 |
| Africa               | 56.25)  | 57.97)       | 0.14)         |        | 318.09)  | 330.02)  | 0.16)       |        | 546.27)   | 340.70)  | -1.10)  |        | 10.43)  | 6.49)   | -1.12)  |        |
|                      | 35.94   | 31.23        |               |        | 404.19   | 356.78   |             |        | 509.24    | 293.72   | -1.69   | 9.68   | 5.53    | -1.73   |         |        |
| Central Latin        | (22.92, | (19.17,      | -0.48 (-0.49, | <0.001 | (337.68, | (298.55, | (-0.46,     | <0.001 | (481.36,  | (240.18, | (-2.04, | <0.001 | (9.15,  | (4.50,  | (-2.09, | <0.001 |
| America              | 53.90)  | 47.46)       | -0.46)        |        | 486.52)  | 428.97)  | -0.39)      |        | 536.07)   | 361.87)  | -1.34)  |        | 10.18)  | 6.81)   | -1.37)  |        |
|                      | 19.57   |              |               |        | 248.63   | 239.09   |             |        | 662.62    | 309.75   | -2.50   | 12.70  | 5.88    | -2.53   |         |        |
| Tropical Latin       | (11.06, | 15.65 (8.76, | -0.76 (-0.78, | <0.001 | (198.61, | (191.95, | (-0.15,     | <0.001 | (625.14,  | (284.27, | (-2.72, | <0.001 | (11.97, | (5.39,  | (-2.76, | <0.001 |
| America              | 32.12)  | 25.80)       | -0.72)        |        | 305.80)  | 293.87)  | -0.11)      |        | 699.75)   | 336.50)  | -2.28)  |        | 13.40)  | 6.38)   | -2.31)  |        |
|                      | 45.24   | 43.65        |               |        | 292.30   | 283.15   |             |        | 382.77    | 309.66   | -0.74   | 7.31   | 5.91    | -0.74   |         |        |
| Central Sub-Saharan  | (29.47, | (28.46,      | -0.13 (-0.14, | <0.001 | (252.08, | (241.24, | (-0.12,     | <0.001 | (233.16,  | (189.61, | (-0.88, | <0.001 | (4.41,  | (3.58,  | (-0.89, | <0.001 |
| Africa               | 67.64)  | 65.05)       | -0.11)        |        | 346.01)  | 335.73)  | -0.09)      |        | 636.41)   | 489.31)  | -0.59)  |        | 12.24)  | 9.39)   | -0.59)  |        |
| 160                  |         |              |               |        |          |          |             |        |           |          |         |        |         |         |         |        |



|                             |                     |                     |                      |        |                  |                  |                    |        |                   |                      |                |        |                |                    |                |        |
|-----------------------------|---------------------|---------------------|----------------------|--------|------------------|------------------|--------------------|--------|-------------------|----------------------|----------------|--------|----------------|--------------------|----------------|--------|
| Western Europe              | 32.73               | 26.69               | -0.69 (-0.73, -0.65) | <0.001 | 446.30           | 445.47           | 0.02 (-0.06, 0.10) | 0.593  | 196.19            | 79.87 (74.32, 86.31) | -3.04          | 3.66   | 1.46           | -3.10              |                |        |
|                             | (20.31, 48.27)      | (16.78, 39.16)      |                      |        | (384.17, 522.47) | (386.78, 513.53) |                    |        | (185.29, 207.38)  |                      | (-3.16, -2.92) | <0.001 | (3.47, 3.85)   | (1.36, 1.57)       | (-3.37, -2.83) | <0.001 |
|                             |                     |                     |                      |        |                  |                  |                    |        |                   |                      |                |        |                |                    |                |        |
| High-income North America   | 55.53               | 39.74               | -1.14 (-1.18, -1.10) | <0.001 | 418.06           | 468.70           | 0.40 (0.33, 0.47)  | <0.001 | 269.96            | 235.98               | -0.54          | 5.02   | 4.44           | -0.48              |                |        |
|                             | (34.69, 85.53)      | (27.36, 55.29)      |                      |        | (350.61, 498.41) | (398.35, 554.76) |                    |        | (256.97, 282.44)  | (223.11, 256.07)     | (-0.90, -0.17) | 0.005  | (4.80, 5.22)   | (4.20, 4.82)       | (-0.82, -0.13) | 0.007  |
|                             |                     |                     |                      |        |                  |                  |                    |        |                   |                      |                |        |                |                    |                |        |
| Central Asia                | 48.36               | 47.06               | -0.09 (-0.11, -0.08) | <0.001 | 511.41           | 488.01           | -0.15              |        | 735.84            | 736.68               | -0.06          | 14.09  | 14.11          | -0.06              |                |        |
|                             | (32.26, 70.77)      | (31.53, 68.38)      |                      |        | (440.41, 596.81) | (423.62, 569.48) | (-0.20, -0.09)     | <0.001 | (686.52, 782.59)  | (630.26, 859.45)     | (-0.43, 0.30)  | 0.733  | (13.12, 14.97) | (12.05, 16.48)     | (-0.43, 0.30)  | 0.728  |
|                             |                     |                     |                      |        |                  |                  |                    |        |                   |                      |                |        |                |                    |                |        |
| Eastern Europe              | 45.93               | 49.23               | 0.23 (0.20, 0.26)    | <0.001 | 490.53           | 537.69           | 0.35 (0.14, 0.55)  | 0.001  | 425.17            | 472.55               | 0.46           | 8.08   | 8.97           | 0.46 (-0.47, 1.41) | 0.334          |        |
|                             | (30.63, 66.91)      | (32.98, 72.10)      |                      |        | (410.67, 584.17) | (449.83, 643.42) |                    |        | (365.52, 464.71)  | (375.27, 604.59)     | (-0.46, 1.40)  | 0.327  | (6.95, 8.83)   | (7.06, 11.47)      |                |        |
|                             |                     |                     |                      |        |                  |                  |                    |        |                   |                      |                |        |                |                    |                |        |
| Southern Sub-Saharan Africa | 55.88               | 50.70               | -0.33 (-0.38, -0.28) | <0.001 | 334.21           | 300.34           | -0.36              |        | 521.45            | 235.02               | -2.57          | 9.94   | 4.43           | -2.60              |                |        |
|                             | (37.04, 80.89)      | (33.31, 74.41)      |                      |        | (281.57, 401.75) | (253.14, 360.14) | (-0.41, -0.32)     | <0.001 | (421.44, 621.88)  | (155.66, 331.18)     | (-4.27, -0.83) | 0.004  | (8.04, 11.92)  | (2.90, 6.27)       | (-4.33, -0.84) | 0.004  |
|                             |                     |                     |                      |        |                  |                  |                    |        |                   |                      |                |        |                |                    |                |        |
| High-income Asia Pacific    | 21.09               | 17.86               | -0.57 (-0.63, -0.52) | <0.001 | 293.77           | 285.47           | -0.07              |        | 195.89            | 57.23 (51.28, 63.61) | -4.12          | 3.68   | 1.04           | -4.24              |                |        |
|                             | (12.75, 32.40)      | (10.78, 27.36)      |                      |        | (248.62, 349.38) | (240.90, 337.28) | (-0.13, -0.01)     | 0.019  | (171.57, 221.63)  |                      | (-4.56, -3.68) | <0.001 | (3.23, 4.17)   | (0.93, 1.16)       | (-4.72, -3.77) | <0.001 |
|                             |                     |                     |                      |        |                  |                  |                    |        |                   |                      |                |        |                |                    |                |        |
| Central Europe              | 26.39               | 23.20               | -0.46 (-0.54, -0.38) | <0.001 | 416.18           | 392.95           | -0.18              |        | 494.43            | 168.61               | -3.69          | 9.35   | 3.07           | -3.81              |                |        |
|                             | (15.39, 41.65)      | (14.11, 35.85)      |                      |        | (337.26, 516.36) | (323.00, 477.20) | (-0.22, -0.14)     | <0.001 | (472.08, 519.10)  | (140.60, 202.28)     | (-4.15, -3.23) | <0.001 | (8.95, 9.80)   | (2.55, 3.75)       | (-4.28, -3.34) | <0.001 |
|                             |                     |                     |                      |        |                  |                  |                    |        |                   |                      |                |        |                |                    |                |        |
| Andean Latin America        | 10.52 (4.99, 17.73) | 10.21 (4.88, 17.33) | -0.11 (-0.14, -0.07) | <0.001 | 178.27           | 180.70           | 0.06 (-0.01, 0.12) | 0.085  | 514.44            | 212.61               | -3.10          | 9.85   | 4.01           | -3.16              |                |        |
|                             |                     |                     |                      |        | (140.53, 224.14) | (141.66, 227.75) |                    |        | (404.10, 639.49)  | (148.84, 288.76)     | (-3.83, -2.37) | <0.001 | (7.71, 12.25)  | (2.79, 5.48)       | (-3.89, -2.42) | <0.001 |
|                             |                     |                     |                      |        |                  |                  |                    |        |                   |                      |                |        |                |                    |                |        |
| Caribbean                   | 87.68               | 89.41               | 0.06 (0.04, 0.08)    | <0.001 | 725.18           | 711.00           | -0.06              |        | 762.22            | 639.76               | -0.61          | 14.57  | 12.21          | -0.62              |                |        |
|                             | (59.48, 126.79)     | (60.67, 130.82)     |                      |        | (637.38, 831.62) | (625.35, 810.30) | (-0.10, -0.02)     | 0.001  | (628.69, 939.50)  | (427.76, 919.13)     | (-0.99, -0.23) | 0.002  | (11.99, 18.06) | (8.12, 17.65)      | (-1.01, -0.23) | 0.002  |
|                             |                     |                     |                      |        |                  |                  |                    |        |                   |                      |                |        |                |                    |                |        |
| Southern Latin America      | 17.91               | 15.23 (8.57, 24.63) | -0.57 (-0.59, -0.55) | <0.001 | 212.19           | 201.07           | -0.17              |        | 323.72            | 132.73               | -3.03          | 6.21   | 2.52           | -3.06              |                |        |
|                             | (10.50, 28.02)      |                     |                      |        | (182.23, 249.21) | (174.30, 236.52) | (-0.21, -0.12)     | <0.001 | (288.53, 366.11)  | (110.85, 159.22)     | (-3.19, -2.87) | <0.001 | (5.52, 7.01)   | (2.10, 3.04)       | (-3.22, -2.90) | <0.001 |
|                             |                     |                     |                      |        |                  |                  |                    |        |                   |                      |                |        |                |                    |                |        |
| Oceania                     | 42.07               | 42.88               | 0.07 (0.05, 0.09)    | <0.001 | 470.52           | 479.51           | 0.08 (0.02, 0.13)  | 0.004  | 771.76            | 911.66               | 0.59           | 14.64  | 17.34          | 0.60 (0.48, 0.73)  | <0.001         |        |
|                             | (27.02, 62.44)      | (27.69, 65.11)      |                      |        | (369.49, 599.07) | (372.70, 607.74) |                    |        | (472.77, 1241.42) | (579.25, 1501.78)    | (0.47, 0.71)   | <0.001 | (8.83, 23.82)  | (10.85, 28.77)     |                |        |
|                             |                     |                     |                      |        |                  |                  |                    |        |                   |                      |                |        |                |                    |                |        |

|                              |                 |                 |                      |        |                  |                  |                    |        |                    |                       |                |        |                |                |                    |        |
|------------------------------|-----------------|-----------------|----------------------|--------|------------------|------------------|--------------------|--------|--------------------|-----------------------|----------------|--------|----------------|----------------|--------------------|--------|
|                              | 37.42           | 29.58           | -0.81 (-0.87, -0.76) | <0.001 | 367.16           | 307.32           | -0.58              |        | 179.50             | 92.11 (78.76, 105.73) | -2.24          |        | 3.36           | 1.72           | -2.37              |        |
| Australasia                  | (24.09, 56.39)  | (17.52, 45.84)  |                      |        | (316.56, 430.17) | (266.06, 361.19) | (-0.71, -0.45)     | <0.001 | (157.27, 204.00)   |                       | (-2.51, -1.96) | <0.001 | (2.92, 3.82)   | (1.46, 1.98)   | (-2.61, -2.12)     | <0.001 |
| <b>Men</b>                   |                 |                 |                      |        |                  |                  |                    |        |                    |                       |                |        |                |                |                    |        |
|                              | 68.24           | 65.01           | -0.16 (-0.19, -0.14) | <0.001 | 586.01           | 587.58           | 0.01 (-0.01, 0.03) | 0.524  | 1512.59            | 1356.12               | -0.35          |        | 28.94          | 25.92          | -0.35              |        |
| Global                       | (45.33, 101.45) | (43.27, 95.57)  |                      |        | (483.12, 715.24) | (489.23, 712.43) |                    |        | (1420.91, 1614.09) | (1235.38, 1507.79)    | (-0.69, 0.00)  | 0.050  | (27.15, 30.91) | (23.58, 28.83) | (-0.71, 0.01)      | 0.055  |
| <b>SDI category</b>          |                 |                 |                      |        |                  |                  |                    |        |                    |                       |                |        |                |                |                    |        |
|                              | 91.52           | 71.04           | -0.87 (-0.89, -0.85) | <0.001 | 574.15           | 553.85           | -0.13              |        | 1016.53            | 579.85                | -1.87          |        | 19.38          | 10.98          | -1.91              |        |
| High                         | (60.97, 136.09) | (48.54, 102.81) |                      |        | (489.39, 687.34) | (478.55, 649.61) | (-0.16, -0.09)     | <0.001 | (983.99, 1051.55)  | (526.94, 664.46)      | (-2.06, -1.67) | <0.001 | (18.78, 20.03) | (9.95, 12.62)  | (-2.10, -1.72)     | <0.001 |
|                              | 67.47           | 60.37           | -0.38 (-0.41, -0.36) | <0.001 | 618.47           | 593.99           | -0.15              |        | 1822.91            | 1201.85               | -1.33          |        | 34.91          | 22.88          | -1.35              |        |
| High-middle                  | (44.77, 99.83)  | (39.73, 88.65)  |                      |        | (499.63, 766.49) | (478.31, 735.07) | (-0.19, -0.11)     | <0.001 | (1661.06, 1947.65) | (1087.23, 1340.56)    | (-1.86, -0.80) | <0.001 | (31.77, 37.32) | (20.72, 25.52) | (-1.88, -0.81)     | <0.001 |
|                              | 61.20           | 65.68           | 0.26 (0.18, 0.34)    | <0.001 | 620.89           | 633.05           | 0.07 (0.03, 0.12)  | <0.001 | 1451.79            | 1461.85               | 0.07           |        | 27.70          | 27.92          | 0.08 (-0.09, 0.25) | 0.378  |
| Middle                       | (40.61, 90.86)  | (44.01, 95.43)  |                      |        | (497.78, 777.21) | (518.64, 774.09) |                    |        | (1334.62, 1583.97) | (1317.70, 1623.60)    | (-0.09, 0.24)  | 0.395  | (25.46, 30.27) | (25.13, 31.06) |                    |        |
|                              | 61.24           | 63.59           | 0.13 (0.11, 0.14)    | <0.001 | 521.65           | 552.79           | 0.20 (0.17, 0.22)  | <0.001 | 1761.70            | 1850.13               | 0.16           |        | 33.84          | 35.53          | 0.16 (-0.71, 1.03) | 0.725  |
| Low-middle                   | (40.35, 91.72)  | (41.96, 94.63)  |                      |        | (436.49, 631.18) | (462.72, 671.08) |                    |        | (1555.03, 2020.48) | (1592.51, 2160.42)    | (-0.71, 1.03)  | 0.724  | (29.85, 38.79) | (30.49, 41.58) |                    |        |
|                              | 63.11           | 66.92           | 0.20 (0.17, 0.23)    | <0.001 | 511.43           | 553.10           | 0.28 (0.22, 0.35)  | <0.001 | 1316.98            | 1323.43               | 0.10           |        | 25.26          | 25.36          | 0.10 (-0.26, 0.46) | 0.594  |
| Low                          | (42.00, 94.66)  | (44.40, 98.32)  |                      |        | (430.74, 616.21) | (465.79, 665.04) |                    |        | (1113.93, 1565.82) | (1110.54, 1574.13)    | (-0.26, 0.46)  | 0.578  | (21.38, 30.03) | (21.20, 30.20) |                    |        |
| <b>21 GBD region</b>         |                 |                 |                      |        |                  |                  |                    |        |                    |                       |                |        |                |                |                    |        |
|                              | 61.55           | 64.11           | 0.13 (0.11, 0.16)    | <0.001 | 489.03           | 523.07           | 0.24 (0.19, 0.29)  | <0.001 | 2113.79            | 2260.72               | 0.39           |        | 40.71          | 43.52          | 0.39 (-0.67, 1.46) | 0.474  |
| South Asia                   | (40.33, 91.81)  | (42.07, 96.12)  |                      |        | (408.88, 591.31) | (435.78, 635.72) |                    |        | (1820.41, 2423.79) | (1899.96, 2658.62)    | (-0.66, 1.45)  | 0.471  | (35.04, 46.73) | (36.58, 51.27) |                    |        |
|                              | 51.31           | 48.78           | -0.18 (-0.22, -0.13) | <0.001 | 682.94           | 673.12           | -0.04              |        | 999.72             | 1059.81               | 0.31           |        | 18.83          | 19.96          | 0.32 (-0.02, 0.66) | 0.068  |
| East Asia                    | (33.64, 75.93)  | (32.11, 72.19)  |                      |        | (518.94, 881.79) | (511.22, 870.34) | (-0.09, 0.00)      | 0.062  | (818.29, 1180.17)  | (862.87, 1270.10)     | (-0.02, 0.64)  | 0.062  | (15.29, 22.29) | (16.17, 24.02) |                    |        |
|                              | 100.02          | 102.30          | 0.09 (0.04, 0.13)    | <0.001 | 865.80           | 892.81           | 0.13 (0.00, 0.26)  | 0.044  | 2772.42            | 1506.88               | -2.08          |        | 53.24          | 28.75          | -2.10              | <0.001 |
| North Africa and Middle East | (67.28, 94.66)  | (69.01, 98.32)  |                      |        | (744.23, 944.23) | (769.72, 969.72) |                    |        | (2449.26, 3449.26) | (1233.60, 1574.13)    | (-2.23, 0.46)  | <0.001 | (46.96, 30.03) | (23.51, 30.20) | (-2.25, 0.46)      | <0.001 |



|                     | 120.34)      | 118.09)      |               |        | 711.11)  | 717.22)  |              |        | 1459.82)      | 981.69)       | -0.82)  |        | 27.83)  | 18.58)  | -0.74)       |        |
|---------------------|--------------|--------------|---------------|--------|----------|----------|--------------|--------|---------------|---------------|---------|--------|---------|---------|--------------|--------|
| High-income Asia    | 57.75        | 49.15        |               |        | 372.31   | 325.71   | -0.45        |        | 697.99        | 299.35        | -2.92   |        | 13.31   | 5.64    | -2.96        |        |
| Pacific             | (38.14,      | (33.01,      | -0.55 (-0.57, | <0.001 | (314.27, | (278.03, | (-0.49,      | <0.001 | (613.59,      | (271.94,      | (-3.24, | <0.001 | (11.69, | (5.13,  | (-3.29,      | <0.001 |
|                     | 84.20)       | 71.69)       | -0.53)        |        | 445.39)  | 384.44)  | -0.42)       |        | 765.10)       | 331.43)       | -2.60)  |        | 14.57)  | 6.27)   | -2.63)       |        |
| Central Europe      | 62.73        | 53.75        |               |        | 641.20   | 564.92   | -0.43        |        | 2682.78       | 783.49        | -4.28   |        | 51.54   | 14.84   | -4.33        |        |
|                     | (40.54,      | (35.88,      | -0.53 (-0.55, | <0.001 | (512.08, | (459.47, | (-0.45,      | <0.001 | (2598.87,     | (675.58,      | (-4.73, | <0.001 | (49.97, | (12.79, | (-4.79,      | <0.001 |
|                     | 95.00)       | 79.76)       | -0.51)        |        | 808.98)  | 698.63)  | -0.41)       |        | 2768.28)      | 904.58)       | -3.82)  |        | 53.22)  | 17.20)  | -3.86)       |        |
| Andean Latin        | 22.86        | 22.63        |               |        | 293.44   | 306.38   |              |        | 915.35        | 574.74        | -1.54   |        | 17.52   | 10.91   | -1.56        |        |
| America             | (12.92,      | (12.81,      | -0.03 (-0.05, | <0.001 | (230.33, | (240.30, | 0.15 (0.13,  | <0.001 | (749.40,      | (435.03,      | (-2.12, | <0.001 | (14.33, | (8.24,  | (-2.15,      | <0.001 |
|                     | 36.07)       | 35.93)       | -0.02)        |        | 372.19)  | 388.02)  | 0.16)        |        | 1102.54)      | 788.10)       | -0.95)  |        | 21.15)  | 15.07)  | -0.97)       |        |
| Caribbean           | 118.39       | 124.04       |               |        | 909.96   | 923.01   |              |        | 1427.97       | 1169.35       | -0.65   |        | 27.28   | 22.30   | -0.66        |        |
|                     | (81.98,      | (84.47,      | 0.16 (0.12,   | <0.001 | (785.20, | (799.92, | 0.05 (0.04,  | <0.001 | (1265.68,     | (883.08,      | (-0.99, | <0.001 | (24.16, | (16.80, | (-1.01,      | <0.001 |
|                     | 170.41)      | 177.23)      | 0.20)         |        | 1065.87) | 1082.20) | 0.06)        |        | 1599.31)      | 1494.93)      | -0.31)  |        | 30.58)  | 28.60)  | -0.31)       |        |
| Southern Latin      | 47.85        | 43.12        |               |        | 305.98   | 291.56   | -0.17        |        | 1116.27       | 522.23        | -2.54   |        | 21.52   | 10.01   | -2.56        |        |
| America             | (31.31,      | (27.93,      | -0.36 (-0.38, | <0.001 | (262.38, | (251.11, | (-0.19,      | <0.001 | (1007.68,     | (446.94,      | (-2.79, | <0.001 | (19.43, | (8.57,  | (-2.81,      | <0.001 |
|                     | 70.72)       | 63.36)       | -0.34)        |        | 362.01)  | 339.96)  | -0.14)       |        | 1235.71)      | 596.57)       | -2.28)  |        | 23.84)  | 11.45)  | -2.30)       |        |
| Oceania             | 66.18        | 67.89        |               |        | 678.20   | 705.95   |              |        | 3562.46       | 3680.20       | 0.09    |        | 68.50   | 70.75   |              |        |
|                     | (43.68,      | (45.41,      | 0.09 (0.06,   | <0.001 | (526.29, | (549.44, | 0.14 (0.13,  | <0.001 | (2686.79,     | (2647.20,     | (-0.07, | 0.261  | (51.49, | (50.86, | 0.09 (-0.07, | 0.267  |
|                     | 98.09)       | 98.85)       | 0.12)         |        | 860.35)  | 907.93)  | 0.14)        |        | 4901.35)      | 5158.66)      | 0.26)   |        | 94.38)  | 99.47)  | 0.26)        |        |
| Australasia         | 183.56       | 161.21       |               |        | 1009.57  | 977.76   | -0.16        |        | 944.22        | 440.86        | -2.58   |        | 18.04   | 8.39    | -2.59        |        |
|                     | (125.60,     | (109.84,     | -0.47 (-0.53, | <0.001 | (873.21, | (850.15, | (-0.39,      | 0.168  | (868.00,      | (380.44,      | (-3.09, | <0.001 | (16.61, | (7.21,  | (-3.11,      | <0.001 |
|                     | 263.15)      | 227.71)      | -0.41)        |        | 1155.42) | 1121.43) | 0.07)        |        | 1024.15)      | 500.27)       | -2.06)  |        | 19.59)  | 9.53)   | -2.07)       |        |
| <b>Stroke</b>       |              |              |               |        |          |          |              |        |               |               |         |        |         |         |              |        |
| <b>15-19 years</b>  |              |              |               |        |          |          |              |        |               |               |         |        |         |         |              |        |
| <b>Women</b>        |              |              |               |        |          |          |              |        |               |               |         |        |         |         |              |        |
| Global              | 15.55 (9.90, | 14.86 (9.30, | -0.13 (-0.20, | 0.001  | 232.87   | 255.33   | 0.38 (0.04,  | 0.028  | 179.01        | 122.84        | -1.28   |        | 1.88    | 1.09    | -1.92        |        |
|                     | 22.78)       | 22.11)       | -0.05)        |        | (180.93, | (202.14, | 0.72)        |        | (159.20,      | (105.12,      | (-1.51, | <0.001 | (1.70,  | (0.95,  | (-2.13,      | <0.001 |
|                     |              |              |               |        | 291.83)  | 317.15)  |              |        | 200.86)       | 141.73)       | -1.04)  |        | 2.06)   | 1.23)   | -1.71)       |        |
| <b>SDI category</b> |              |              |               |        |          |          |              |        |               |               |         |        |         |         |              |        |
| High                | 11.15 (6.38, | 11.41 (6.47, | 0.09 (0.07,   | <0.001 | 184.36   | 230.65   | 0.97 (0.11,  | 0.027  | 99.14 (86.21, | 65.06 (50.61, | -1.41   |        | 0.87    | 0.32    | -3.26        |        |
|                     | 17.28)       | 18.13)       | 0.11)         |        | (141.43, | (175.78, | 1.84)        |        | 114.47)       | 81.58)        | (-1.73, | <0.001 | (0.80,  | (0.28,  | (-3.56,      | <0.001 |
|                     |              |              |               |        | 232.22)  | 289.24)  |              |        |               |               | -1.10)  |        | 0.94)   | 0.36)   | -2.96)       |        |
| High-middle         | 15.56 (9.55, | 14.63 (8.87, | -0.22 (-0.35, | 0.001  | 213.65   | 215.96   | 0.09 (-0.18, | 0.503  | 155.32        | 95.60 (79.04, | -1.62   | <0.001 | 1.52    | 0.69    | -2.63        | <0.001 |

|                              |              |              |               |        |          |          |              |        |          |                |         |        |        |         |         |        |
|------------------------------|--------------|--------------|---------------|--------|----------|----------|--------------|--------|----------|----------------|---------|--------|--------|---------|---------|--------|
|                              | 23.18)       | 22.42)       | -0.09)        |        | (160.65, | (164.85, | 0.37)        |        | (134.97, | 114.49)        | (-1.81, | (1.36, | (0.62, | (-2.87, |         |        |
|                              |              |              |               |        | 273.75)  | 274.05)  |              |        | 177.87)  |                | (-1.42) | 1.71)  | 0.77)  | (-2.38) |         |        |
|                              | 17.22        | 16.28        |               |        | 241.26   | 249.15   |              |        | 204.42   | 130.84         | -1.53   | 2.18   | 1.16   | -2.11   |         |        |
| Middle                       | (10.89,      | (10.21,      | -0.21 (-0.35, | 0.006  | (183.78, | (193.96, | 0.17 (-0.15, | 0.304  | (179.55, | (111.99,       | (-1.69, | <0.001 | (1.94, | (1.02,  | (-2.29, | <0.001 |
|                              | 25.17)       | 24.13)       | -0.06)        |        | 304.02)  | 309.85)  | 0.49)        |        | 229.72)  | 151.64)        | (-1.37) | 2.44)  | 1.33)  | (-1.94) |         |        |
|                              | 15.38        | 15.18 (9.66, | 0.01 (-0.11,  |        | 233.88   | 252.57   | 0.34 (-0.02, |        | 202.22   | 137.27         | -1.34   | 2.26   | 1.32   | -1.86   |         |        |
| Low-middle                   | (10.01,      | 22.19)       | 0.12)         | 0.922  | (182.83, | (198.68, | 0.72)        | 0.067  | (173.39, | (114.34,       | (-1.61, | <0.001 | (1.90, | (1.08,  | (-2.16, | <0.001 |
|                              | 22.35)       |              |               |        | 291.89)  | 313.58)  |              |        | 232.68)  | 161.43)        | (-1.06) | 2.65)  | 1.59)  | (-1.57) |         |        |
|                              | 15.07 (9.86, | 14.10 (8.87, | -0.19 (-0.31, |        | 292.97   | 304.59   | 0.19 (-0.03, |        | 175.35   | 135.14         | -0.88   | 1.83   | 1.24   | -1.32   |         |        |
| Low                          | 21.94)       | 20.75)       | -0.07)        | 0.002  | (235.13, | (241.70, | 0.40)        | 0.090  | (148.38, | (112.58,       | (-1.07, | <0.001 | (1.50, | (0.99,  | (-1.50, | <0.001 |
|                              |              |              |               |        | 361.63)  | 372.58)  |              |        | 206.52)  | 160.22)        | (-0.68) | 2.22)  | 1.54)  | (-1.13) |         |        |
| <b>21 GBD region</b>         |              |              |               |        |          |          |              |        |          |                |         |        |        |         |         |        |
|                              |              |              |               |        | 209.28   | 226.29   |              |        | 163.51   |                | -1.29   | 1.77   | 1.05   | -1.89   |         |        |
| South Asia                   | 14.45 (9.41, | 14.85 (9.36, | 0.11 (0.07,   | <0.001 | (158.95, | (172.52, | 0.35 (-0.03, | 0.070  | (135.00, | 114.97 (93.19, | (-1.79, | <0.001 | (1.42, | (0.84,  | (-2.62, | <0.001 |
|                              | 21.35)       | 21.84)       | 0.15)         |        | 263.87)  | 285.38)  | 0.72)        |        | 194.98)  | 137.28)        | (-0.78) | 2.18)  | 1.30)  | (-1.16) |         |        |
|                              | 14.71 (8.78, | 13.37 (7.55, | -0.30 (-0.48, |        | 212.13   | 198.69   | -0.21        |        | 173.59   | 103.10 (81.78, | -1.75   | 1.68   | 0.70   | -2.98   |         |        |
| East Asia                    | 22.89)       | 21.56)       | -0.12)        | 0.001  | (149.36, | (137.99, | (-0.31,      | <0.001 | (144.42, | 127.56)        | (-2.02, | <0.001 | (1.39, | (0.58,  | (-3.25, | <0.001 |
|                              |              |              |               |        | 284.32)  | 265.99)  | -0.10)       |        | 206.41)  |                | (-1.48) | 2.06)  | 0.83)  | (-2.71) |         |        |
|                              | 19.79        | 18.92        |               |        | 263.35   | 269.30   |              |        | 337.06   | 203.49         | -1.69   | 4.08   | 2.20   | -2.08   |         |        |
| North Africa and Middle East | (13.44,      | (12.25,      | -0.12 (-0.16, | <0.001 | (211.11, | (217.96, | 0.15 (-0.17, | 0.361  | (279.75, | (163.65,       | (-1.95, | <0.001 | (3.34, | (1.68,  | (-2.40, | <0.001 |
|                              | 27.58)       | 26.94)       | -0.08)        |        | 320.79)  | 322.44)  | 0.46)        |        | 406.48)  | 254.01)        | (-1.44) | 4.98)  | 2.92)  | (-1.77) |         |        |
|                              | 14.68 (9.50, | 13.94 (8.51, | -0.12 (-0.28, |        | 302.45   | 313.99   | 0.17 (0.00,  |        | 154.95   | 123.03 (97.07, | -0.79   | 1.55   | 1.08   | -1.22   |         |        |
| Western Sub-Saharan Africa   | 21.84)       | 21.02)       | 0.03)         | 0.121  | (238.27, | (246.20, | 0.34)        | 0.043  | (122.25, | 158.77)        | (-0.92, | <0.001 | (1.15, | (0.78,  | (-1.39, | <0.001 |
|                              |              |              |               |        | 376.33)  | 388.41)  |              |        | 194.96)  |                | (-0.65) | 2.06)  | 1.56)  | (-1.04) |         |        |
|                              | 19.49        | 18.30        |               |        | 245.21   | 255.51   |              |        | 241.62   | 166.06         | -1.27   | 2.59   | 1.51   | -1.84   |         |        |
| Southeast Asia               | (12.80,      | (11.76,      | -0.21 (-0.27, | <0.001 | (194.68, | (200.64, | 0.19 (-0.03, | 0.096  | (194.87, | (138.21,       | (-1.40, | <0.001 | (2.05, | (1.24,  | (-1.99, | <0.001 |
|                              | 27.97)       | 26.65)       | -0.15)        |        | 302.08)  | 315.85)  | 0.41)        |        | 290.63)  | 193.79)        | (-1.15) | 3.17)  | 1.79)  | (-1.68) |         |        |
|                              | 13.98 (8.89, | 12.37 (7.33, | -0.41 (-0.56, |        | 396.97   | 404.09   | 0.11 (-0.09, |        | 184.53   | 130.75         | -1.19   | 1.80   | 1.03   | -1.89   |         |        |
| Eastern Sub-Saharan Africa   | 20.85)       | 19.15)       | -0.27)        | <0.001 | (317.03, | (320.92, | 0.31)        | 0.277  | (147.63, | (103.05,       | (-1.36, | <0.001 | (1.37, | (0.76,  | (-2.12, | <0.001 |
|                              |              |              |               |        | 488.97)  | 497.13)  |              |        | 225.71)  | 160.37)        | (-1.01) | 2.31)  | 1.35)  | (-1.66) |         |        |
|                              | 20.99        | 17.91        |               |        | 301.61   | 281.64   | -0.20        |        | 184.27   |                | -1.64   | 2.13   | 1.13   | -2.04   |         |        |
| Central Latin America        | (13.64,      | (11.49,      | -0.53 (-0.63, | <0.001 | (241.79, | (225.60, | (-0.47,      | 0.161  | (168.98, | 110.58 (93.90, | (-1.75, | <0.001 | (1.97, | (0.93,  | (-2.20, | <0.001 |
|                              | 30.15)       | 26.30)       | -0.43)        |        | 368.85)  | 340.93)  | 0.08)        |        | 200.51)  | 129.54)        | (-1.52) | 2.30)  | 1.34)  | (-1.88) |         |        |

|                             |                         |                         |                      |        |                            |                            |                         |        |                            |                            |                         |        |                      |                      |                         |        |
|-----------------------------|-------------------------|-------------------------|----------------------|--------|----------------------------|----------------------------|-------------------------|--------|----------------------------|----------------------------|-------------------------|--------|----------------------|----------------------|-------------------------|--------|
| Tropical Latin America      | 21.56<br>(14.39, 30.67) | 17.89<br>(11.59, 25.94) | -0.56 (-0.68, -0.43) | <0.001 | 292.34<br>(226.02, 367.57) | 272.31<br>(215.26, 336.36) | -0.23<br>(-0.32, -0.13) | <0.001 | 172.86<br>(155.85, 191.57) | 103.72 (90.30, 118.64)     | -1.68<br>(-2.09, -1.26) | <0.001 | 1.99<br>(1.81, 2.19) | 1.05<br>(0.94, 1.18) | -2.08<br>(-2.51, -1.65) | <0.001 |
| Central Sub-Saharan Africa  | 14.62 (9.53, 21.52)     | 12.68 (7.83, 19.40)     | -0.48 (-0.50, -0.45) | <0.001 | 296.03<br>(219.97, 377.71) | 288.26<br>(219.99, 372.24) | -0.06<br>(-0.24, 0.13)  | 0.561  | 203.59<br>(136.97, 286.26) | 137.47 (99.38, 190.76)     | -1.39<br>(-1.51, -1.27) | <0.001 | 2.25<br>(1.35, 3.41) | 1.33<br>(0.84, 2.02) | -1.83<br>(-1.95, -1.71) | <0.001 |
| Western Europe              | 10.27 (5.67, 16.17)     | 9.38 (5.05, 15.26)      | -0.28 (-0.36, -0.20) | <0.001 | 162.41<br>(119.87, 202.11) | 166.13<br>(123.87, 210.88) | 0.24 (-0.20, 0.68)      | 0.279  | 92.52 (81.70, 105.23)      | 45.22 (35.37, 56.89)       | -2.47<br>(-2.77, -2.16) | <0.001 | 0.89<br>(0.83, 0.96) | 0.23<br>(0.20, 0.26) | -4.62<br>(-5.47, -3.77) | <0.001 |
| High-income North America   | 10.32 (5.43, 16.92)     | 11.91 (6.56, 19.44)     | 0.50 (0.45, 0.55)    | <0.001 | 212.95<br>(154.03, 279.09) | 282.78<br>(210.28, 362.33) | 1.23 (0.06, 2.42)       | 0.039  | 79.43 (65.46, 96.51)       | 73.53 (56.23, 93.52)       | -0.18<br>(-0.79, 0.43)  | 0.553  | 0.56<br>(0.51, 0.60) | 0.35<br>(0.31, 0.39) | -1.58<br>(-2.33, -0.83) | <0.001 |
| Central Asia                | 17.37<br>(11.42, 25.00) | 14.58 (8.89, 22.10)     | -0.58 (-0.70, -0.45) | <0.001 | 189.10<br>(146.81, 234.72) | 187.65<br>(140.59, 237.71) | 0.03 (-0.18, 0.25)      | 0.752  | 138.67<br>(119.57, 160.00) | 102.05 (82.65, 123.31)     | -1.05<br>(-1.38, -0.71) | <0.001 | 1.33<br>(1.17, 1.49) | 0.82<br>(0.65, 1.01) | -1.66<br>(-2.21, -1.11) | <0.001 |
| Eastern Europe              | 15.57 (9.54, 23.65)     | 16.73<br>(10.19, 25.52) | 0.28 (0.18, 0.38)    | <0.001 | 223.56<br>(166.60, 288.79) | 280.15<br>(213.88, 355.84) | 0.84 (0.54, 1.15)       | <0.001 | 126.12<br>(106.69, 148.06) | 110.61 (87.80, 137.41)     | -0.36<br>(-0.95, 0.23)  | 0.229  | 1.02<br>(0.94, 1.09) | 0.66<br>(0.55, 0.77) | -1.54<br>(-2.82, -0.25) | 0.019  |
| Southern Sub-Saharan Africa | 15.27 (9.36, 23.38)     | 13.99 (8.51, 21.61)     | -0.25 (-0.38, -0.12) | <0.001 | 411.64<br>(318.02, 515.66) | 381.06<br>(290.46, 482.03) | -0.24<br>(-0.30, -0.19) | <0.001 | 156.15<br>(127.73, 188.69) | 103.55 (77.65, 133.03)     | -1.37<br>(-1.78, -0.95) | <0.001 | 1.36<br>(1.06, 1.64) | 0.68<br>(0.46, 0.97) | -2.20<br>(-2.89, -1.51) | <0.001 |
| High-income Asia Pacific    | 11.06 (6.56, 17.08)     | 9.79 (5.50, 15.60)      | -0.41 (-0.58, -0.23) | <0.001 | 125.66 (90.71, 164.09)     | 155.22<br>(112.09, 203.33) | 0.84 (0.47, 1.22)       | <0.001 | 116.32<br>(97.86, 134.76)  | 50.18 (37.96, 64.95)       | -2.85<br>(-3.29, -2.39) | <0.001 | 1.16<br>(0.96, 1.35) | 0.20<br>(0.16, 0.24) | -5.85<br>(-6.56, -5.14) | <0.001 |
| Central Europe              | 15.07 (9.13, 22.65)     | 14.10 (8.43, 21.90)     | -0.22 (-0.28, -0.16) | <0.001 | 220.85<br>(172.40, 278.23) | 227.40<br>(176.02, 282.66) | 0.18 (-0.17, 0.52)      | 0.315  | 137.50<br>(117.65, 161.11) | 86.85 (67.98, 109.52)      | -1.52<br>(-1.88, -1.15) | <0.001 | 1.19<br>(1.09, 1.29) | 0.47<br>(0.39, 0.54) | -3.20<br>(-3.61, -2.79) | <0.001 |
| Andean Latin America        | 24.40<br>(18.04, 32.57) | 19.01<br>(12.81, 26.50) | -0.84 (-0.88, -0.81) | <0.001 | 212.85<br>(163.93, 270.30) | 208.85<br>(158.95, 262.78) | -0.03<br>(-0.19, 0.12)  | 0.687  | 325.43<br>(258.93, 402.09) | 169.09<br>(130.16, 218.21) | -2.32<br>(-3.23, -1.40) | <0.001 | 4.22<br>(3.28, 5.29) | 2.04<br>(1.50, 2.73) | -2.57<br>(-3.52, -1.62) | <0.001 |
| Caribbean                   | 18.58<br>(12.36, 26.45) | 17.70<br>(11.78, 25.35) | -0.16 (-0.22, -0.10) | <0.001 | 236.16<br>(185.56, 290.43) | 232.43<br>(183.15, 284.35) | -0.01<br>(-0.30, 0.29)  | 0.965  | 212.10<br>(161.76, 278.51) | 192.12<br>(130.44, 288.85) | -0.14<br>(-0.40, 0.14)  | 0.326  | 2.61<br>(1.94, 3.52) | 2.33<br>(1.48, 3.67) | -0.17<br>(-0.49, 0.15)  | 0.285  |

|                        |                      |                      |                      |                      |                         |                         |                         |                     |                         |                         |                         |                      |                   |                   |                      |                      |
|------------------------|----------------------|----------------------|----------------------|----------------------|-------------------------|-------------------------|-------------------------|---------------------|-------------------------|-------------------------|-------------------------|----------------------|-------------------|-------------------|----------------------|----------------------|
| Southern Latin America | 14.44 (9.12, 21.57)  | 11.81 (7.09, 17.89)  | -0.65 (-0.70, -0.60) | <0.001               | 143.73 (100.80, 195.14) | 128.03 (85.09, 171.22)  | -0.41 (-0.78, -0.05)    | 0.027               | 198.45 (174.27, 223.53) | 101.94 (80.71, 123.59)  | -2.27 (-2.73, -1.81)    | <0.001               | 2.36 (2.07, 2.66) | 1.03 (0.78, 1.30) | -2.80 (-3.38, -2.22) | <0.001               |
|                        | 23.20 (16.18, 32.21) | 22.87 (15.96, 31.60) | -0.02 (-0.06, 0.02)  | 0.397                | 220.21 (167.25, 281.85) | 215.88 (156.32, 280.82) | -0.03 (-0.20, 0.15)     | 0.752               | 206.02 (142.76, 303.10) | 222.64 (152.10, 326.27) | 0.24 (-0.30, 0.78)      | 0.385                | 2.12 (1.28, 3.43) | 2.36 (1.42, 3.77) | 0.38 (0.27, 0.49)    | <0.001               |
| Australasia            | 10.87 (5.94, 17.70)  | 11.03 (5.97, 17.82)  | 0.06 (-0.03, 0.14)   | 0.199                | 164.88 (111.67, 229.03) | 170.14 (110.79, 239.62) | 0.17 (-0.14, 0.47)      | 0.282               | 64.56 (48.98, 84.64)    | 42.24 (27.89, 59.01)    | -1.36 (-2.12, -0.59)    | 0.001                | 0.47 (0.35, 0.60) | 0.15 (0.10, 0.21) | -3.69 (-6.02, -1.29) | 0.003                |
|                        | <b>Men</b>           |                      |                      |                      |                         |                         |                         |                     |                         |                         |                         |                      |                   |                   |                      |                      |
| Global                 | 13.06 (8.41, 19.10)  | 12.48 (7.93, 18.58)  | -0.14 (-0.20, -0.07) | <0.001               | 151.28 (115.46, 191.20) | 163.07 (126.99, 204.88) | 0.34 (-0.03, 0.71)      | 0.072               | 205.96 (182.39, 230.70) | 139.40 (120.61, 160.25) | -1.38 (-1.62, -1.14)    | <0.001               | 2.50 (2.21, 2.82) | 1.57 (1.35, 1.84) | -1.63 (-1.94, -1.31) | <0.001               |
|                        | <b>SDI category</b>  |                      |                      |                      |                         |                         |                         |                     |                         |                         |                         |                      |                   |                   |                      |                      |
| High                   | 8.38 (4.92, 13.17)   | 8.33 (4.71, 13.37)   | 0.01 (-0.08, 0.10)   | 0.839                | 113.07 (83.56, 148.64)  | 151.89 (111.19, 197.09) | 1.24 (0.20, 2.29)       | 0.019               | 102.79 (86.22, 115.85)  | 49.73 (40.84, 60.35)    | -2.37 (-2.70, -2.03)    | <0.001               | 1.13 (0.90, 1.25) | 0.34 (0.31, 0.40) | -4.00 (-4.18, -3.82) | <0.001               |
|                        | High-middle          | 12.73 (8.04, 18.90)  | 11.13 (6.76, 17.09)  | -0.46 (-0.50, -0.41) | <0.001                  | 125.27 (93.35, 162.79)  | 116.19 (85.69, 149.78)  | -0.17 (-0.42, 0.08) | 0.175                   | 201.05 (172.75, 230.51) | 100.48 (86.57, 115.73)  | -2.38 (-2.60, -2.17) | <0.001            | 2.44 (2.05, 2.85) | 1.05 (0.90, 1.22)    | -2.83 (-3.22, -2.44) |
| Middle                 |                      | 14.51 (9.48, 21.08)  | 13.76 (8.76, 20.15)  | -0.17 (-0.22, -0.11) | <0.001                  | 158.28 (118.43, 199.64) | 163.69 (126.11, 206.76) | 0.18 (-0.13, 0.48)  | 0.255                   | 251.04 (219.70, 285.41) | 176.84 (145.35, 208.86) | -1.16 (-1.33, -0.99) | <0.001            | 3.10 (2.70, 3.57) | 2.07 (1.67, 2.49)    | -1.34 (-1.52, -1.16) |
|                        | Low-middle           | 13.12 (8.54, 19.16)  | 12.70 (8.05, 18.84)  | -0.10 (-0.19, -0.01) | 0.037                   | 170.54 (131.54, 215.42) | 172.82 (133.68, 217.71) | 0.11 (-0.19, 0.41)  | 0.479                   | 194.24 (166.00, 226.02) | 137.61 (115.86, 162.79) | -1.25 (-1.85, -0.65) | <0.001            | 2.34 (1.94, 2.77) | 1.55 (1.31, 1.87)    | -1.51 (-2.19, -0.82) |
| Low                    |                      | 14.00 (9.21, 20.30)  | 13.16 (8.27, 19.47)  | -0.20 (-0.29, -0.10) | <0.001                  | 178.80 (141.80, 220.85) | 185.95 (146.49, 230.14) | 0.21 (0.01, 0.41)   | 0.038                   | 204.42 (167.06, 245.83) | 154.45 (124.37, 190.26) | -0.97 (-1.28, -0.66) | <0.001            | 2.49 (1.97, 3.06) | 1.79 (1.40, 2.25)    | -1.16 (-1.51, -0.80) |
|                        | <b>21 GBD region</b> |                      |                      |                      |                         |                         |                         |                     |                         |                         |                         |                      |                   |                   |                      |                      |
| South Asia             | 11.97 (7.65, 17.99)  | 11.64 (7.20, 17.62)  | -0.08 (-0.14, -0.03) | 0.003                | 164.29 (123.96, 210.80) | 161.92 (120.63, 210.44) | 0.00 (-0.26, 0.26)      | 0.989               | 135.35 (108.87, 164.11) | 97.81 (78.67, 123.01)   | -1.29 (-2.69, 0.14)     | 0.077                | 1.52 (1.18, 1.90) | 1.00 (0.77, 1.32) | -1.67 (-3.45, 0.14)  | 0.071                |
|                        | 167                  |                      |                      |                      |                         |                         |                         |                     |                         |                         |                         |                      |                   |                   |                      |                      |

|                              |              |                     |                      |        |                |               |                    |        |               |                |          |         |        |        |         |         |        |
|------------------------------|--------------|---------------------|----------------------|--------|----------------|---------------|--------------------|--------|---------------|----------------|----------|---------|--------|--------|---------|---------|--------|
| East Asia                    | 13.56 (8.53, | 11.68 (7.05,        | -0.51 (-0.59,        | <0.001 | 125.30 (85.93, | 96.18 (65.29, | -0.89              | <0.001 | 278.65        | 146.77         | -2.20    | 3.48    | 1.68   | -2.50  |         |         |        |
|                              | 20.04)       | 18.25)              | -0.43)               |        | 168.68)        | 131.91)       | (-1.14,            |        | (223.38,      | (116.14,       | (-2.44,  | <0.001  | (2.70, | (1.30, | (-2.77, | <0.001  |        |
|                              |              |                     |                      |        |                |               |                    |        | -0.64)        | 336.34)        | 176.46)  | -1.96)  |        | 4.26)  | 2.09)   | -2.22)  |        |
| North Africa and Middle East | 15.18        | 15.61               | 0.12 (-0.01, 0.25)   | 0.061  | 194.86         | 204.33        | 0.29 (-0.02, 0.59) | 0.068  | 365.71        | 273.98         | -0.94    | 4.69    | 3.39   | -1.09  |         |         |        |
|                              | (10.08,      | (10.25,             |                      |        | (151.63,       | (163.28,      |                    |        | (282.88,      | (191.84,       | (-1.17,  | <0.001  | (3.58, | (2.30, | (-1.31, | <0.001  |        |
|                              | 21.80)       | 22.56)              |                      |        | 239.59)        | 248.55)       |                    |        | 453.26)       | 364.34)        | -0.71)   |         | 5.94)  | 4.64)  | -0.87)  |         |        |
| Western Sub-Saharan Africa   | 14.94 (9.17, | 14.42 (8.65,        | -0.11 (-0.15,        | <0.001 | 190.98         | 201.94        | 0.24 (-0.01, 0.49) | 0.062  | 145.94        | 118.89 (90.24, | -0.70    | 1.68    | 1.28   | -0.94  |         |         |        |
|                              | 22.17)       | 21.54)              | -0.07)               |        | (149.79,       | (159.72,      |                    |        | (111.96,      |                | (151.23) | (-0.84, | <0.001 | (1.21, | (0.90,  | (-1.07, | <0.001 |
|                              |              |                     |                      |        | 236.13)        | 246.48)       |                    |        | 186.18)       |                | 151.23)  | -0.56)  |        | 2.24)  | 1.74)   | -0.80)  |        |
| Southeast Asia               | 17.38        | 16.40               | -0.16 (-0.28, -0.04) | 0.010  | 180.98         | 176.77        | -0.02              | 0.906  | 242.74        | 222.09         | -0.28    | 2.86    | 2.57   | -0.34  |         |         |        |
|                              | (11.85,      | (10.92,             |                      |        | (139.73,       | (136.45,      |                    |        | (199.46,      | (184.49,       | (-0.50,  | 0.011   | (2.29, | (2.11, | (-0.57, | 0.006   |        |
|                              | 24.74)       | 23.71)              |                      |        | 224.15)        | 221.93)       |                    |        | 305.96)       | 260.96)        | -0.06)   |         | 3.71)  | 3.12)  | -0.10)  |         |        |
| Eastern Sub-Saharan Africa   | 15.80        | 14.21 (9.09, 20.88) | -0.36 (-0.38, -0.34) | <0.001 | 204.41         | 214.98        | 0.23 (-0.07, 0.53) | 0.130  | 313.37        | 214.75         | -1.28    | 4.00    | 2.60   | -1.46  |         |         |        |
|                              | (10.61,      |                     |                      |        | (162.52,       | (168.93,      |                    |        | (241.38,      | (169.06,       | (-1.37,  | <0.001  | (2.99, | (1.97, | (-1.55, | <0.001  |        |
|                              | 22.45)       |                     |                      |        | 254.39)        | 263.80)       |                    |        | 389.11)       | 270.45)        | -1.19)   |         | 5.04)  | 3.36)  | -1.36)  |         |        |
| Central Latin America        | 13.11 (8.47, | 11.91 (7.29,        | -0.32 (-0.37,        | <0.001 | 205.26         | 206.85        | 0.03 (-0.10, 0.17) | 0.633  | 155.63        | 105.18 (87.30, | -1.25    | 1.93    | 1.22   | -1.46  |         |         |        |
|                              | 19.23)       | 17.87)              | -0.27)               |        | (159.07,       | (162.40,      |                    |        | (141.63,      |                | (125.13) | (-1.63, | <0.001 | (1.75, | (0.99,  | (-1.85, | <0.001 |
|                              |              |                     |                      |        | 253.61)        | 256.11)       |                    |        | 169.86)       |                | 125.13)  | -0.88)  |        | 2.11)  | 1.51)   | -1.07)  |        |
| Tropical Latin America       | 15.78        | 13.29 (8.40, 19.70) | -0.52 (-0.61, -0.44) | <0.001 | 236.40         | 206.87        | -0.43              | <0.001 | 171.92        | 107.47 (93.77, | -1.58    | 2.13    | 1.25   | -1.77  |         |         |        |
|                              | (10.20,      |                     |                      |        | (181.16,       | (158.05,      |                    |        | (155.98,      |                | (122.69) | (-1.96, | <0.001 | (1.92, | (1.08,  | (-2.25, | <0.001 |
|                              | 23.01)       |                     |                      |        | 304.89)        | 263.81)       |                    |        | 189.68)       |                | 122.69)  | -1.19)  |        | 2.33)  | 1.43)   | -1.29)  |        |
| Central Sub-Saharan Africa   | 12.23 (7.84, | 10.94 (6.76,        | -0.34 (-0.47,        | <0.001 | 167.99         | 163.28        | -0.04              | 0.729  | 222.29        | 147.65 (98.37, | -1.43    | 2.78    | 1.74   | -1.63  |         |         |        |
|                              | 18.20)       | 16.74)              | -0.21)               |        | (119.64,       | (115.16,      |                    |        | (149.38,      |                | (215.79) | (-1.59, | <0.001 | (1.77, | (1.06,  | (-1.80, | <0.001 |
|                              |              |                     |                      |        | 223.79)        | 216.71)       |                    |        | 322.50)       |                | 215.79)  | -1.27)  |        | 4.17)  | 2.67)   | -1.46)  |        |
| Western Europe               | 8.20 (4.72,  | 6.92 (3.77,         | -0.58 (-0.67,        | <0.001 | 93.65 (65.49,  | 90.10 (64.66, | -0.01              | 0.946  | 104.37        | 36.10 (29.70,  | -3.66    | 1.22    | 0.27   | -5.07  |         |         |        |
|                              | 12.72)       | 11.16)              | -0.49)               |        | 123.95)        | 119.56)       | (-0.43,            |        | (94.05,       |                | (43.40)  | (-4.09, | <0.001 | (1.10, | (0.23,  | (-5.85, | <0.001 |
|                              |              |                     |                      |        |                |               | 0.40)              |        | 115.87)       |                | 43.40)   | -3.22)  |        | 1.34)  | 0.31)   | -4.28)  |        |
| High-income North America    | 7.95 (4.32,  | 8.82 (4.80,         | 0.39 (0.29,          | <0.001 | 153.78         | 213.05        | 1.39 (0.12, 2.67)  | 0.031  | 68.09 (58.11, | 57.15 (44.88,  | -0.57    | 0.59    | 0.37   | -1.64  |         |         |        |
|                              | 13.15)       | 14.34)              | 0.49)                |        | (107.55,       | (149.69,      |                    |        | (80.63)       | (71.20)        | (-1.03,  | 0.018   | (0.53, | (0.32, | (-2.18, | <0.001  |        |
|                              |              |                     |                      |        | 209.51)        | 286.02)       |                    |        |               |                |          | -0.10)  |        | 0.66)  | 0.43)   | -1.11)  |        |
| Central Asia                 | 12.84 (8.22, | 10.76 (6.48,        | -0.59 (-0.68,        | <0.001 | 77.43 (54.05,  | 79.42 (54.34, | 0.19 (-0.28,       | 0.422  | 124.43        | 100.54 (82.20, | -0.57    | 1.40    | 1.07   | -0.68  |         |         |        |
|                              | 19.03)       | 16.91)              | -0.51)               |        | 102.46)        | 108.40)       | 0.66)              |        | (108.71,      |                | (122.35) | (-1.00, | 0.009  | (1.24, | (0.83,  | (-1.22, | 0.014  |
|                              |              |                     |                      |        |                |               |                    |        |               |                | 139.72)  | 122.35) | -0.15) |        | 1.60)   | 1.36)   | -0.14) |



|                     |              |              |               |        |               |               |              |        |               |                |          |          |         |             |        |         |         |         |
|---------------------|--------------|--------------|---------------|--------|---------------|---------------|--------------|--------|---------------|----------------|----------|----------|---------|-------------|--------|---------|---------|---------|
| Eastern Europe      | 10.57 (6.22, | 9.33 (5.37,  | -0.42 (-0.60, | <0.001 | 70.43 (47.42, | 68.01 (45.08, | -0.03        | 0.899  | 108.04        | 85.86 (70.93,  | -0.59    | 1.18     | 0.88    | -0.76       | 0.338  |         |         |         |
|                     | 16.48)       | 14.82)       | -0.23)        |        | 97.09)        | 92.29)        | (-0.47,      |        | (94.59,       | 103.65)        | (-1.82,  | 0.354    | (1.03,  | (0.70,      |        | (-2.30, |         |         |
|                     |              |              |               |        |               |               | 0.41)        |        | 120.66)       | 120.66)        | 103.65)  | 0.66)    |         | 1.28)       |        | 1.09)   | 0.80)   |         |
| Southern            | 14.14 (9.03, | 13.46 (8.27, | -0.15 (-0.34, | 0.111  | 230.87        | 235.90        | 0.12 (-0.04, | 0.157  | 151.50        | 140.77         | -0.18    | 1.68     | 1.53    | -0.20       | 0.527  |         |         |         |
| Sub-Saharan Africa  | 20.78)       | 20.44)       | 0.04)         |        | (175.41,      | (175.78,      | 0.28)        |        | (116.08,      | (104.16,       | (-0.72,  | 0.523    | (1.22,  | (1.03,      |        | (-0.80, |         |         |
|                     |              |              |               |        |               | 295.44)       | 300.49)      |        |               | 192.99)        | 200.01)  | 0.37)    |         | 2.23)       |        | 2.29)   | 0.41)   |         |
| High-income Asia    | 7.94 (4.59,  | 6.81 (3.62,  | -0.51 (-0.80, | 0.001  | 52.43 (33.38, | 74.06 (48.97, | 1.26 (0.97,  | <0.001 | 147.77        | 38.44 (30.64,  | -4.53    | 1.81     | 0.26    | -6.25       | <0.001 |         |         |         |
| Pacific             | 12.23)       | 11.32)       | -0.21)        |        | 73.53)        | 103.30)       | 1.56)        |        | (79.02,       | 46.78)         | (-5.15,  | <0.001   | (0.86,  | (0.21,      |        | (-7.09, |         |         |
|                     |              |              |               |        |               |               |              |        | 181.00)       | 181.00)        | -3.90)   |          | 2.24)   | 0.30)       |        | -5.40)  |         |         |
| Central Europe      | 9.78 (5.90,  | 8.08 (4.59,  | -0.63 (-0.70, | <0.001 | 63.58 (43.16, | 54.33 (36.19, | -0.43        | 0.287  | 124.68        | 63.77 (52.14,  | -2.27    | 1.43     | 0.60    | -3.04       | <0.001 |         |         |         |
|                     | 15.11)       | 12.82)       | -0.56)        |        | 84.91)        | 74.65)        | (-1.23,      |        | (111.00,      | 75.08)         | (-2.64,  | <0.001   | (1.28,  | (0.48,      |        | (-3.53, |         |         |
|                     |              |              |               |        |               |               | 0.37)        |        | 138.53)       | 138.53)        | -1.91)   |          | 1.57)   | 0.73)       |        | -2.54)  |         |         |
| Andean Latin        | 22.65        | 17.49        | -0.89 (-0.93, | <0.001 | 207.66        | 203.31        | -0.06        | 0.073  | 415.27        | 210.36         | -2.31    | 5.57     | 2.71    | -2.45       | <0.001 |         |         |         |
| America             | (17.01,      | (11.95,      |               |        | -0.85)        | (158.71,      | (154.76,     |        | (-0.13,       | (326.26,       | (154.91, | (-2.88,  | <0.001  | (4.32,      |        | (1.94,  | (-3.06, |         |
|                     | 29.79)       | 24.41)       |               |        |               | 263.38)       | 257.11)      |        | 0.01)         | 526.65)        | 282.66)  | -1.73)   |         | 7.12)       |        | 3.74)   | -1.83)  |         |
| Caribbean           | 10.84 (6.74, | 10.24 (6.20, | -0.18 (-0.22, | <0.001 | 216.82        | 212.75        | -0.03        | 0.761  | 147.90        | 111.30 (77.58, | -0.86    | 1.80     | 1.30    | -0.97       | <0.001 |         |         |         |
|                     | 16.46)       | 15.86)       | -0.15)        |        | (165.40,      | (161.36,      | (-0.23,      |        | (119.91,      | 160.59)        | (-1.10,  | <0.001   | (1.41,  | (0.83,      |        | (-1.25, |         |         |
|                     |              |              |               |        |               | 268.78)       | 264.57)      |        | 0.17)         | 185.04)        | 185.04)  | -0.63)   |         | 2.31)       |        | 1.96)   | -0.70)  |         |
| Southern Latin      | 11.70 (7.44, | 9.53 (5.71,  | -0.70 (-0.73, | <0.001 | 76.47 (46.77, | 66.53 (40.09, | -0.43        | <0.001 | 223.52        | 107.32 (80.87, | -2.52    | 2.89     | 1.27    | -2.86       | <0.001 |         |         |         |
| America             | 17.03)       | 14.43)       | -0.68)        |        | 108.54)       | 97.66)        | (-0.65,      |        | (187.86,      | 138.53)        | (-2.99,  | <0.001   | (2.41,  | (0.91,      |        | (-3.38, |         |         |
|                     |              |              |               |        |               |               | -0.22)       |        | 263.75)       | 263.75)        | -2.04)   |          | 3.45)   | 1.71)       |        | -2.33)  |         |         |
| Oceania             | 25.91        | 23.89        | -0.27 (-0.29, | <0.001 | 179.93        | 176.82        | -0.04        | 0.281  | 369.81        | 385.19         | 0.15     | 4.62     | 4.85    | 0.08 (0.01, | 0.021  |         |         |         |
|                     | (19.87,      | (17.84,      | -0.24)        |        | (131.17,      | (126.65,      | (-0.12,      |        | (225.50,      | (230.70,       | (-0.00,  | 0.055    | (2.59,  | (2.67,      |        | 0.16)   |         |         |
|                     | 33.68)       | 31.73)       |               |        | 233.72)       | 233.65)       | 0.03)        |        | 590.34)       | 637.37)        | 0.30)    |          | 7.67)   | 8.36)       |        |         |         |         |
| Australasia         | 7.59 (3.97,  | 7.29 (3.82,  | -0.14 (-0.20, | <0.001 | 74.92 (39.09, | 74.84 (39.63, | 0.04 (-0.31, | 0.842  | 59.41 (48.38, | 26.10 (18.90,  | -2.81    | 0.61     | 0.15    | -4.75       | <0.001 |         |         |         |
|                     | 12.36)       | 12.20)       | -0.08)        |        | 113.10)       | 118.76)       | 0.38)        |        | 72.91)        | 34.44)         | (-3.68,  | <0.001   | (0.49,  | (0.10,      |        | (-6.00, |         |         |
|                     |              |              |               |        |               |               |              |        |               |                | -1.93)   |          | 0.77)   | 0.23)       |        | -3.49)  |         |         |
| <b>20-24 years</b>  |              |              |               |        |               |               |              |        |               |                |          |          |         |             |        |         |         |         |
| <b>Women</b>        |              |              |               |        |               |               |              |        |               |                |          |          |         |             |        |         |         |         |
| Global              | 19.14        | 17.10        | -0.38 (-0.41, | <0.001 | 305.76        | 326.65        | 0.30 (-0.07, | 0.117  | 249.00        | 172.70         | -1.25    | 2.87     | 1.74    | -1.66       | <0.001 |         |         |         |
|                     | (13.69,      | (11.79,      |               |        | -0.35)        | (242.07,      |              |        | (263.64,      | 0.68)          | (221.63, | (149.57, | (-1.45, | <0.001      |        | (2.59,  | (1.51,  | (-1.89, |
|                     | 26.69)       | 24.53)       |               |        |               | 369.69)       |              |        | 393.21)       |                | 278.67)  | 196.16)  | -1.05)  |             |        | 3.20)   | 1.97)   | -1.43)  |
| <b>SDI category</b> |              |              |               |        |               |               |              |        |               |                |          |          |         |             |        |         |         |         |

|                              |                      |                      |                      |        |                         |                         |                     |       |                         |                         |                      |        |                   |                   |                      |        |
|------------------------------|----------------------|----------------------|----------------------|--------|-------------------------|-------------------------|---------------------|-------|-------------------------|-------------------------|----------------------|--------|-------------------|-------------------|----------------------|--------|
|                              | 13.72 (9.13, 20.08)  | 13.46 (8.69, 20.34)  | -0.06 (-0.12, 0.00)  | 0.066  | 257.50 (202.70, 310.98) | 305.24 (240.70, 369.07) | 0.76 (0.06, 1.46)   | 0.034 | 136.53 (120.72, 155.20) | 90.07 (72.41, 110.45)   | -1.36 (-1.75, -0.97) | <0.001 | 1.35 (1.25, 1.45) | 0.56 (0.49, 0.64) | -3.06 (-3.34, -2.77) | <0.001 |
| High                         | 19.51 (13.86, 27.49) | 16.90 (11.29, 25.29) | -0.46 (-0.61, -0.32) | <0.001 | 285.30 (219.70, 350.01) | 287.23 (223.78, 350.69) | 0.09 (-0.18, 0.36)  | 0.525 | 209.38 (181.72, 238.74) | 131.43 (108.03, 156.89) | -1.52 (-2.03, -1.02) | <0.001 | 2.22 (1.96, 2.55) | 1.08 (0.95, 1.23) | -2.39 (-2.92, -1.85) | <0.001 |
| High-middle                  | 21.08 (15.16, 29.21) | 18.68 (12.91, 26.72) | -0.41 (-0.46, -0.36) | <0.001 | 321.81 (253.39, 392.13) | 331.95 (268.19, 398.92) | 0.17 (-0.08, 0.42)  | 0.179 | 278.42 (242.52, 313.64) | 181.04 (155.28, 208.62) | -1.37 (-1.71, -1.04) | <0.001 | 3.22 (2.82, 3.65) | 1.80 (1.56, 2.08) | -1.91 (-2.23, -1.59) | <0.001 |
| Middle                       | 18.75 (13.59, 25.94) | 17.21 (12.01, 24.46) | -0.27 (-0.39, -0.16) | <0.001 | 304.16 (242.96, 366.33) | 324.27 (258.49, 391.89) | 0.32 (-0.07, 0.72)  | 0.109 | 302.09 (260.61, 350.41) | 198.96 (168.65, 236.37) | -1.40 (-1.73, -1.07) | <0.001 | 3.75 (3.14, 4.46) | 2.19 (1.80, 2.64) | -1.85 (-2.28, -1.41) | <0.001 |
| Low-middle                   | 19.23 (14.26, 25.96) | 16.42 (11.61, 23.13) | -0.51 (-0.58, -0.44) | <0.001 | 360.25 (296.81, 429.81) | 366.09 (296.10, 438.53) | 0.12 (-0.04, 0.28)  | 0.128 | 259.03 (217.12, 305.73) | 198.86 (165.04, 234.48) | -0.90 (-1.02, -0.77) | <0.001 | 3.09 (2.49, 3.77) | 2.16 (1.72, 2.62) | -1.22 (-1.33, -1.11) | <0.001 |
| Low                          | <b>21 GBD region</b> |                      |                      |        |                         |                         |                     |       |                         |                         |                      |        |                   |                   |                      |        |
|                              | 16.96 (11.95, 23.85) | 16.15 (10.93, 23.22) | -0.14 (-0.28, 0.00)  | 0.055  | 276.28 (217.76, 336.33) | 296.57 (230.17, 363.94) | 0.34 (-0.06, 0.75)  | 0.094 | 250.74 (209.73, 301.40) | 170.13 (138.90, 204.69) | -1.38 (-1.87, -0.89) | <0.001 | 3.06 (2.46, 3.76) | 1.80 (1.43, 2.27) | -1.92 (-2.60, -1.24) | <0.001 |
| South Asia                   | 17.66 (11.97, 25.34) | 14.80 (9.37, 22.92)  | -0.60 (-0.66, -0.54) | <0.001 | 272.94 (198.29, 351.69) | 268.68 (199.02, 340.68) | -0.03 (-0.10, 0.05) | 0.474 | 228.69 (183.83, 279.16) | 144.55 (113.12, 177.93) | -1.67 (-2.46, -0.88) | <0.001 | 2.40 (1.86, 3.11) | 1.16 (0.91, 1.46) | -2.16 (-2.78, -1.53) | <0.001 |
| East Asia                    | 26.62 (20.40, 34.84) | 24.69 (18.33, 32.96) | -0.25 (-0.28, -0.21) | <0.001 | 362.98 (301.34, 425.33) | 365.60 (301.21, 426.76) | 0.10 (-0.21, 0.41)  | 0.528 | 414.78 (339.56, 505.09) | 270.36 (214.66, 337.09) | -1.44 (-1.71, -1.17) | <0.001 | 5.33 (4.22, 6.68) | 3.14 (2.39, 4.12) | -1.77 (-2.10, -1.45) | <0.001 |
| North Africa and Middle East | 17.67 (12.78, 24.79) | 15.45 (10.72, 22.64) | -0.42 (-0.54, -0.30) | <0.001 | 369.53 (297.96, 443.32) | 373.51 (301.85, 447.88) | 0.07 (-0.13, 0.28)  | 0.480 | 221.25 (176.38, 279.43) | 184.78 (146.51, 237.29) | -0.61 (-0.72, -0.50) | <0.001 | 2.53 (1.90, 3.36) | 1.96 (1.42, 2.69) | -0.86 (-0.99, -0.72) | <0.001 |
| Western Sub-Saharan Africa   | 24.96 (18.31, 34.05) | 22.41 (16.01, 31.22) | -0.36 (-0.41, -0.32) | <0.001 | 343.96 (277.22, 409.80) | 348.13 (281.49, 418.85) | 0.07 (-0.12, 0.27)  | 0.453 | 374.62 (299.10, 450.96) | 244.65 (203.18, 285.62) | -1.44 (-1.57, -1.31) | <0.001 | 4.48 (3.45, 5.54) | 2.52 (2.02, 3.06) | -1.95 (-2.11, -1.78) | <0.001 |
| Southeast Asia               | 17.68 (12.89, 25.96) | 12.76 (8.30, 19.33)  | -1.06 (-1.21, -0.92) | <0.001 | 457.20 (372.13, 540.07) | 454.16 (368.03, 540.29) | 0.02 (-0.20, 0.23)  | 0.868 | 269.13 (217.74, 320.52) | 176.93 (141.69, 212.17) | -1.44 (-1.53, -1.35) | <0.001 | 3.08 (2.37, 3.79) | 1.69 (1.25, 2.13) | -2.04 (-2.15, -1.93) | <0.001 |
| Eastern Sub-Saharan Africa   |                      |                      |                      |        |                         |                         |                     |       |                         |                         |                      |        |                   |                   |                      |        |
| Africa                       |                      |                      |                      |        |                         |                         |                     |       |                         |                         |                      |        |                   |                   |                      |        |
|                              | 170                  |                      |                      |        |                         |                         |                     |       |                         |                         |                      |        |                   |                   |                      |        |

|                             |              |              |                      |        |          |          |              |        |          |                |         |        |        |        |         |        |
|-----------------------------|--------------|--------------|----------------------|--------|----------|----------|--------------|--------|----------|----------------|---------|--------|--------|--------|---------|--------|
|                             | 24.42)       |              |                      |        | 551.61)  | 552.57)  |              |        | 336.52)  | 215.79)        | -1.35)  | 4.01)  | 2.17)  | -1.93) |         |        |
| Central Latin America       | 25.89        | 20.56        | -0.80 (-0.96, -0.64) | <0.001 | 419.40   | 385.80   | -0.24        |        | 239.10   | 144.47         | -1.60   | 2.97   | 1.59   | -1.95  |         |        |
|                             | (18.82,      | (14.34,      |                      |        | (341.18, | (317.12, | (-0.55,      | 0.134  | (218.96, | (118.25,       | (-1.94, | <0.001 | (2.76, | (1.25, | (-2.43, | <0.001 |
|                             | 35.65)       | 29.49)       |                      |        | 499.29)  | 455.84)  | 0.07)        |        | 260.50)  | 175.98)        | -1.26)  |        | 3.20)  | 2.02)  | -1.46)  |        |
| Tropical Latin America      | 29.22        | 20.41        | -1.17 (-1.36, -0.97) | <0.001 | 400.71   | 361.82   | -0.33        |        | 282.09   | 140.22         | -2.32   | 3.62   | 1.55   | -2.83  |         |        |
|                             | (21.70,      | (14.12,      |                      |        | (315.81, | (295.28, | (-0.44,      | <0.001 | (255.88, | (121.93,       | (-2.80, | <0.001 | (3.29, | (1.35, | (-3.39, | <0.001 |
|                             | 39.06)       | 29.04)       |                      |        | 489.83)  | 435.96)  | -0.23)       |        | 311.04)  | 162.41)        | -1.83)  |        | 3.95)  | 1.78)  | -2.26)  |        |
| Central Sub-Saharan Africa  | 18.31        | 14.04 (9.48, | -0.88 (-0.94, -0.82) | <0.001 | 364.63   | 341.02   | -0.20        |        | 244.69   | 171.52         | -1.24   | 2.91   | 1.83   | -1.62  |         |        |
|                             | (13.43,      | 20.96)       |                      |        | (280.35, | (258.24, | (-0.42,      | 0.057  | (169.64, | (119.39,       | (-1.33, | <0.001 | (1.77, | (1.09, | (-1.71, | <0.001 |
|                             | 25.20)       |              |                      |        | 450.91)  | 416.78)  | 0.01)        |        | 340.10)  | 233.61)        | -1.16)  |        | 4.28)  | 2.72)  | -1.53)  |        |
| Western Europe              | 12.55 (8.24, | 10.91 (6.72, | -0.46 (-0.56, -0.36) | <0.001 | 221.80   | 220.96   | 0.08 (-0.30, | 0.680  | 129.31   | 63.07 (50.87,  | -2.42   | 1.39   | 0.40   | -4.20  |         |        |
|                             | 18.55)       | 16.83)       |                      |        | (168.49, | (170.57, | 0.46)        |        | (116.43, | 77.70)         | (-2.80, | <0.001 | (1.30, | (0.35, | (-4.49, | <0.001 |
|                             |              |              |                      |        | 274.45)  | 271.59)  |              |        | 145.32)  |                | -2.04)  |        | 1.49)  | 0.46)  | -3.91)  |        |
| High-income North America   | 12.75 (7.94, | 13.64 (8.51, | 0.24 (0.19,          | <0.001 | 287.46   | 372.32   | 1.16 (0.15,  | 0.024  | 115.01   | 98.63 (77.59,  | -0.51   | 0.97   | 0.56   | -1.85  |         |        |
|                             | 19.78)       | 21.13)       | 0.29)                |        | (218.83, | (287.28, | 2.17)        |        | (96.99,  | 122.10)        | (-1.21, | 0.151  | (0.89, | (0.50, | (-2.26, | <0.001 |
|                             |              |              |                      |        | 359.81)  | 461.16)  |              |        | 135.09)  |                | 0.19)   |        | 1.05)  | 0.63)  | -1.44)  |        |
| Central Asia                | 23.95        | 19.11        | -0.75 (-0.91, -0.58) | <0.001 | 284.46   | 274.95   | -0.08        |        | 259.21   | 170.28         | -1.51   | 2.99   | 1.68   | -2.19  |         |        |
|                             | (18.20,      | (13.30,      |                      |        | (231.57, | (219.23, | (-0.34,      | 0.575  | (230.36, | (137.71,       | (-1.92, | <0.001 | (2.67, | (1.33, | (-2.88, | <0.001 |
|                             | 31.87)       | 26.70)       |                      |        | 338.46)  | 333.72)  | 0.19)        |        | 288.98)  | 204.55)        | -1.11)  |        | 3.32)  | 2.10)  | -1.49)  |        |
| Eastern Europe              | 19.47        | 19.87        | 0.09 (0.00,          | 0.048  | 299.79   | 366.93   | 0.76 (0.43,  | <0.001 | 169.77   | 159.28         | -0.14   | 1.51   | 1.18   | -0.82  |         |        |
|                             | (13.34,      | (13.15,      | 0.17)                |        | (234.09, | (287.81, | 1.10)        |        | (144.07, | (127.27,       | (-0.94, | 0.727  | (1.36, | (0.93, | (-1.75, | 0.085  |
|                             | 28.05)       | 29.28)       |                      |        | 373.87)  | 447.98)  |              |        | 197.65)  | 196.04)        | 0.66)   |        | 1.65)  | 1.49)  | 0.11)   |        |
| Southern Sub-Saharan Africa | 17.13        | 13.79 (8.79, | -0.71 (-0.80,        | <0.001 | 501.24   | 449.85   | -0.36        |        | 245.46   | 139.36         | -1.85   | 2.65   | 1.14   | -2.77  |         |        |
|                             | (11.61,      | 21.35)       | -0.61)               |        | (391.43, | (350.90, | (-0.45,      | <0.001 | (200.39, | (102.85,       | (-2.95, | 0.001  | (2.10, | (0.72, | (-4.53, | 0.003  |
|                             | 25.46)       |              |                      |        | 614.46)  | 550.52)  | -0.27)       |        | 292.16)  | 179.41)        | -0.73)  |        | 3.25)  | 1.60)  | -0.98)  |        |
| High-income Asia Pacific    | 13.79 (9.22, | 11.30 (6.93, | -0.68 (-0.74,        | <0.001 | 217.09   | 220.68   | 0.13 (-0.33, | 0.578  | 157.22   | 68.34 (52.49,  | -2.83   | 1.70   | 0.36   | -5.33  |         |        |
|                             | 20.16)       | 17.64)       | -0.61)               |        | (172.15, | (170.11, | 0.59)        |        | (131.92, | 85.62)         | (-3.07, | <0.001 | (1.44, | (0.30, | (-5.76, | <0.001 |
|                             |              |              |                      |        | 261.96)  | 270.70)  |              |        | 182.27)  |                | -2.59)  |        | 1.99)  | 0.42)  | -4.91)  |        |
| Central Europe              | 20.76        | 18.44        | -0.39 (-0.47,        | <0.001 | 305.62   | 309.15   | 0.13 (-0.35, | 0.596  | 197.56   | 125.35 (98.75, | -1.53   | 1.94   | 0.84   | -3.04  |         |        |
|                             | (14.83,      | (12.56,      | -0.32)               |        | (241.40, | (243.68, | 0.62)        |        | (174.14, | 153.54)        | (-1.81, | <0.001 | (1.80, | (0.67, | (-3.47, | <0.001 |
|                             | 29.02)       | 26.64)       |                      |        | 363.87)  | 375.76)  |              |        | 223.89)  |                | -1.25)  |        | 2.09)  | 1.03)  | -2.61)  |        |
| Andean Latin America        | 32.54        | 23.31        | -1.14 (-1.17,        | <0.001 | 328.67   | 303.57   | -0.22        | <0.001 | 423.93   | 199.34         | -2.51   | 5.85   | 2.51   | -2.81  |         |        |
|                             | (25.76,      | (17.13,      | -1.11)               |        | (265.75, | (241.58, | (-0.35,      |        | (343.18, | (150.53,       | (-3.27, | <0.001 | (4.62, | (1.79, | (-3.67, | <0.001 |



| 21 GBD region                |              |              |               |        |                |                |              |        |               |               |         |        |        |        |         |        |
|------------------------------|--------------|--------------|---------------|--------|----------------|----------------|--------------|--------|---------------|---------------|---------|--------|--------|--------|---------|--------|
|                              |              |              |               |        | 211.24         | 212.88         |              |        | 216.22        | 184.01        | -0.53   |        | 2.75   | 2.26   | -0.56   |        |
| South Asia                   | 13.90 (9.61, | 13.55 (9.24, | -0.07 (-0.21, | 0.347  | (162.13,       | (162.23,       | 0.09 (-0.21, | 0.570  | (174.71,      | (152.76,      | (-1.25, | 0.146  | (2.18, | (1.81, | (-1.49, | 0.235  |
|                              |              | 19.85)       | 19.65)        |        | 0.07)          | 262.10)        | 268.39)      |        | 0.38)         | 261.47)       | 221.69) |        | 0.19)  | 3.40)  | 2.81)   |        |
| East Asia                    | 17.57        | 15.69        | -0.38 (-0.48, | <0.001 | 182.69         | 158.47         | -0.48        | <0.001 | 334.52        | 247.06        | -0.95   | <0.001 | 4.41   | 3.16   | -1.05   | <0.001 |
|                              | (12.56,      | (10.96,      | -0.27)        |        | (135.16,       | (115.64,       | (-0.62,      |        | (267.65,      | (189.19,      | (-1.46, |        | 5.35)  | 3.87)  | (-1.63, |        |
| North Africa and Middle East | 19.70        | 19.66        | 0.01 (-0.07,  | 0.777  | 271.97         | 282.94         | 0.21 (-0.14, | 0.235  | 408.40        | 342.20        | -0.61   | 0.001  | 5.54   | 4.52   | -0.69   | 0.003  |
|                              | (14.83,      | (14.65,      | 0.09)         |        | (223.02,       | (233.00,       | 0.55)        |        | (323.51,      | (248.09,      | (-0.95, |        | 6.95)  | 6.02)  | (-1.13, |        |
| Western Sub-Saharan Africa   | 19.16        | 17.68        | -0.24 (-0.32, | <0.001 | 250.12         | 258.87         | 0.17 (-0.05, | 0.133  | 315.12        | 276.39        | -0.45   | <0.001 | 4.22   | 3.62   | -0.53   | <0.001 |
|                              | (14.21,      | (12.60,      | -0.17)        |        | (199.50,       | (206.85,       | 0.39)        |        | (245.34,      | (211.54,      | (-0.59, |        | 5.48)  | 4.92)  | (-0.68, |        |
| Southeast Asia               | 24.78        | 23.02        | -0.23 (-0.37, | 0.001  | 269.08         | 262.49         | -0.02        | 0.871  | 400.46        | 366.28        | -0.32   | <0.001 | 5.22   | 4.71   | -0.33   | 0.011  |
|                              | (19.02,      | (17.38,      | -0.09)        |        | (217.02,       | (212.59,       | (-0.31,      |        | (329.28,      | (293.63,      | (-0.50, |        | 6.38)  | 5.67)  | (-0.59, |        |
| Eastern Sub-Saharan Africa   | 20.80        | 17.01        | -0.68 (-0.72, | <0.001 | 263.78         | 269.74         | 0.14 (-0.15, | 0.335  | 537.64        | 397.06        | -1.03   | <0.001 | 7.54   | 5.42   | -1.12   | <0.001 |
|                              | (15.78,      | (12.37,      | -0.65)        |        | (214.46,       | (216.28,       | 0.43)        |        | (429.90,      | (313.61,      | (-1.20, |        | 9.16)  | 6.97)  | (-1.29, |        |
| Central Latin America        | 15.47        | 13.40 (9.00, | -0.49 (-0.53, | <0.001 | 261.57         | 262.31         | 0.05 (-0.14, | 0.599  | 208.17        | 137.43        | -1.29   | <0.001 | 2.79   | 1.73   | -1.51   | <0.001 |
|                              | (11.05,      | 19.44)       | -0.45)        |        | (211.50,       | (210.61,       | 0.23)        |        | (187.15,      | (115.37,      | (-1.56, |        | 3.08)  | 2.08)  | (-1.80, |        |
| Tropical Latin America       | 21.37        | 15.16        | -1.17 (-1.30, | <0.001 | 308.05         | 270.37         | -0.43        | <0.001 | 273.85        | 142.29        | -2.18   | <0.001 | 3.72   | 1.79   | -2.42   | <0.001 |
|                              | (15.47,      | (10.32,      | -1.05)        |        | (240.38,       | (215.05,       | (-0.61,      |        | (249.86,      | (125.38,      | (-2.58, |        | 4.06)  | 2.03)  | (-2.92, |        |
| Central Sub-Saharan Africa   | 16.23        | 13.16 (9.00, | -0.70 (-0.77, | <0.001 | 218.51         | 209.24         | -0.12        | 0.216  | 379.59        | 288.52        | -1.01   | <0.001 | 5.25   | 3.90   | -1.11   | <0.001 |
|                              | (11.93,      | 18.95)       | -0.63)        |        | (158.01,       | (153.49,       | (-0.31,      |        | (262.25,      | (198.03,      | (-1.19, |        | 7.80)  | 5.82)  | (-1.28, |        |
| Western Europe               | 10.46 (7.02, | 8.27 (5.13,  | -0.80 (-0.90, | <0.001 | 133.00 (99.45, | 125.57 (94.35, | -0.13        | 0.480  | 158.67        | 57.29 (48.49, | -3.54   | <0.001 | 2.04   | 0.53   | -4.70   | <0.001 |
|                              | 15.03)       | 12.80)       | -0.70)        |        | 166.56)        | 157.92)        | (-0.48,      |        | (143.80,      | 67.12)        | (-3.92, |        | 2.25)  | 0.61)  | (-5.05, |        |
| High-income North America    | 9.28 (5.69,  | 9.70 (5.99,  | 0.20 (0.06,   | 0.005  | 211.89         | 272.52         | 1.19 (-0.16, | 0.083  | 98.08 (85.44, | 84.00 (69.03, | -0.49   | 0.186  | 0.99   | 0.68   | -1.27   | <0.001 |
|                              | 14.54)       | 15.26)       | 0.34)         |        | (153.15,       | (198.82,       | 2.56)        |        | 113.36)       | 100.83)       | (-1.22, |        | 0.90,  | 0.60,  | (-1.88, |        |

|                    |              |              |               |        |                |                |              |        |               |                |         |        |        |        |         |        |
|--------------------|--------------|--------------|---------------|--------|----------------|----------------|--------------|--------|---------------|----------------|---------|--------|--------|--------|---------|--------|
|                    |              |              |               |        | 271.16)        | 349.85)        |              |        |               |                | 0.24)   | 1.08)  | 0.79)  | -0.65) |         |        |
|                    | 19.48        | 16.09        |               |        | 153.33         | 144.28         | -0.20        |        | 206.49        | 181.21         | -0.54   | 2.59   | 2.23   | -0.67  |         |        |
| Central Asia       | (14.98,      | (11.59,      | -0.65 (-0.69, | <0.001 | (117.68,       | (105.26,       | (-0.34,      | 0.009  | (185.63,      | (150.54,       | (-1.03, | 0.030  | (2.33, | (1.81, | (-1.37, | 0.063  |
|                    | 25.55)       | 22.33)       | -0.62)        |        | 192.02)        | 185.80)        | -0.05)       |        | 228.05)       | 217.68)        | -0.05)  |        | 2.86)  | 2.70)  | 0.04)   |        |
|                    | 15.87        | 14.16 (9.98, | -0.37 (-0.44, |        | 133.11 (96.85, | 121.68 (88.73, | -0.25        |        | 183.49        | 181.86         | -0.11   |        | 2.27   | 2.26   | -0.11   |        |
| Eastern Europe     | (11.45,      | 19.77)       | -0.30)        | <0.001 | 170.84)        | 157.41)        | (-0.65,      | 0.231  | (164.47,      | (148.42,       | (-1.53, | 0.876  | (2.07, | (1.79, | (-1.71, | 0.893  |
|                    | 21.89)       |              |               |        |                |                | 0.16)        |        | 200.67)       | 234.49)        | 1.32)   |        | 2.45)  | 3.01)  | 1.51)   |        |
|                    | 17.89        | 15.29        |               |        | 299.70         | 296.24         |              |        | 208.13        | 195.53         | -0.08   |        | 2.54   | 2.36   | -0.07   |        |
| Southern           | (12.97,      | (10.62,      | -0.52 (-0.63, | <0.001 | (235.46,       | (227.64,       | 0.02 (-0.13, |        | (157.55,      | (154.76,       | (-1.11, | 0.882  | (1.81, | (1.78, | (-1.30, | 0.907  |
| Sub-Saharan Africa | 24.79)       | 22.01)       | -0.41)        |        | 369.87)        | 363.17)        | 0.17)        |        | 269.71)       | 253.38)        | 0.96)   |        | 3.43)  | 3.21)  | 1.17)   |        |
|                    | 11.00 (7.43, | 8.62 (5.25,  | -0.83 (-0.95, |        | 99.06 (73.11,  | 104.46 (71.97, | 0.20 (-0.17, |        | 153.50        | 56.29 (45.77,  | -3.38   |        | 1.94   | 0.46   | -4.82   |        |
| High-income Asia   | 15.61)       | 13.54)       | -0.70)        | <0.001 | 127.74)        | 136.53)        | 0.56)        | 0.292  | (118.85,      | 67.43)         | (-3.85, | <0.001 | (1.39, | (0.38, | (-5.47, | <0.001 |
| Pacific            |              |              |               |        |                |                |              |        | 177.66)       |                | -2.92)  |        | 2.27)  | 0.54)  | -4.16)  |        |
|                    | 14.79        | 11.55 (7.85, | -0.83 (-0.92, |        | 122.40 (93.25, | 97.74 (72.79,  | -0.66        |        | 195.24        | 107.63 (90.05, | -2.13   |        | 2.46   | 1.18   | -2.67   |        |
| Central Europe     | (10.73,      | 16.67)       | -0.75)        | <0.001 | 154.68)        | 124.01)        | (-1.09,      | 0.003  | (177.40,      | 125.37)        | (-2.56, | <0.001 | (2.25, | (0.97, | (-3.28, | <0.001 |
|                    | 20.11)       |              |               |        |                |                | -0.22)       |        | 212.26)       |                | -1.69)  |        | 2.66)  | 1.41)  | -2.05)  |        |
|                    | 29.45        | 21.82        |               |        | 295.71         | 265.71         | -0.34        |        | 505.95        | 287.63         | -1.76   |        | 7.22   | 3.97   | -1.82   |        |
| Andean Latin       | (23.52,      | (16.41,      | -1.04 (-1.09, | <0.001 | (234.44,       | (212.20,       | (-0.46,      | <0.001 | (395.86,      | (205.85,       | (-2.30, | <0.001 | (5.60, | (2.78, | (-2.40, | <0.001 |
| America            | 36.85)       | 28.80)       | -0.99)        |        | 360.57)        | 323.64)        | -0.21)       |        | 627.40)       | 382.14)        | -1.21)  |        | 9.06)  | 5.37)  | -1.24)  |        |
|                    | 14.14        | 12.83 (8.71, | -0.33 (-0.38, |        | 276.11         | 269.33         | -0.03        |        | 230.38        | 180.40         | -0.73   |        | 3.11   | 2.37   | -0.81   |        |
| Caribbean          | (10.00,      | 18.52)       | -0.28)        | <0.001 | (220.40,       | (212.96,       | (-0.26,      | 0.804  | (194.24,      | (129.90,       | (-1.10, | <0.001 | (2.58, | (1.59, | (-1.22, | <0.001 |
|                    | 19.87)       |              |               |        | 336.40)        | 327.95)        | 0.20)        |        | 275.49)       | 261.96)        | -0.37)  |        | 3.77)  | 3.63)  | -0.40)  |        |
|                    | 15.56        | 11.81 (7.90, | -0.94 (-1.03, |        | 138.97 (93.73, | 113.71 (77.60, | -0.67        |        | 311.39        | 138.53         | -2.83   |        | 4.32   | 1.74   | -3.17   |        |
| Southern Latin     | (11.26,      | 16.94)       | -0.84)        | <0.001 | 186.64)        | 155.13)        | (-0.83,      | <0.001 | (266.29,      | (107.24,       | (-3.38, | <0.001 | (3.66, | (1.30, | (-3.80, | <0.001 |
| America            | 21.21)       |              |               |        |                |                | -0.51)       |        | 363.57)       | 176.11)        | -2.28)  |        | 5.07)  | 2.26)  | -2.53)  |        |
|                    | 37.48        | 36.01        |               |        | 315.52         | 305.59         | -0.08        |        | 607.07        | 601.91         | -0.16   |        | 8.25   | 8.19   | -0.15   |        |
| Oceania            | (30.99,      | (29.43,      | -0.13 (-0.15, | <0.001 | (249.31,       | (234.39,       | (-0.21,      | 0.226  | (381.18,      | (357.14,       | (-0.42, | 0.206  | (4.98, | (4.61, | (-0.40, | 0.249  |
|                    | 45.33)       | 44.13)       | -0.11)        |        | 388.23)        | 389.50)        | 0.05)        |        | 982.54)       | 937.41)        | 0.09)   |        | 13.88) | 13.13) | 0.10)   |        |
|                    | 9.95 (6.28,  | 8.84 (5.27,  | -0.40 (-0.44, |        | 108.54 (66.87, | 105.40 (63.68, | -0.04        |        | 87.29 (71.54, | 40.12 (29.44,  | -2.58   |        | 1.00   | 0.30   | -3.92   |        |
| Australasia        | 15.09)       | 13.89)       | -0.35)        | <0.001 | 156.19)        | 159.01)        | (-0.35,      | 0.780  | 105.52)       | 53.08)         | (-2.92, | <0.001 | (0.79, | (0.20, | (-4.48, | <0.001 |
|                    |              |              |               |        |                |                | 0.26)        |        |               |                | -2.23)  |        | 1.25)  | 0.43)  | -3.35)  |        |
| <b>25-29 years</b> |              |              |               |        |                |                |              |        |               |                |         |        |        |        |         |        |
| <b>Women</b>       |              |              |               |        |                |                |              |        |               |                |         |        |        |        |         |        |

|                              | 2019                | 2020           | Change (2020-2019)   | Significance | 2019             | 2020             | Change (2020-2019)             | Significance | 2019             | 2020             | Change (2020-2019) | Significance | 2019         | 2020         | Change (2020-2019) | Significance |
|------------------------------|---------------------|----------------|----------------------|--------------|------------------|------------------|--------------------------------|--------------|------------------|------------------|--------------------|--------------|--------------|--------------|--------------------|--------------|
| Global                       | 27.10               | 22.99          | -0.56 (-0.66, -0.45) | <0.001       | 413.51           | 417.00           | 0.09 (-0.26, 0.45)             | 0.610        | 334.43           | 214.16           | -1.42              | <0.001       | 4.22         | 2.30         | -2.14              | <0.001       |
|                              | (19.22, 38.22)      | (15.52, 33.51) |                      |              | (339.85, 487.54) | (344.57, 487.39) |                                |              | (300.00, 370.63) | (185.52, 243.67) | (-1.90, -0.94)     |              | (3.82, 4.64) | (1.99, 2.62) | (-2.57, -1.70)     |              |
|                              | <b>SDI category</b> |                |                      |              |                  |                  |                                |              |                  |                  |                    |              |              |              |                    |              |
| High                         | 19.21               | 18.25          | -0.18 (-0.20, -0.16) | <0.001       | 356.97           | 402.08           | 0.57 (-0.10, 1.25)             | 0.095        | 188.84           | 124.70           | -1.39              | <0.001       | 2.09         | 0.93         | -2.67              | <0.001       |
|                              | (12.75, 28.93)      | (11.72, 28.40) |                      |              | (293.57, 418.50) | (329.88, 471.89) |                                |              | (166.94, 210.73) | (102.35, 150.83) | (-1.67, -1.12)     |              | (1.97, 2.22) | (0.84, 1.06) | (-2.96, -2.38)     |              |
| High-middle                  | 27.94               | 22.12          | -0.80 (-0.91, -0.68) | <0.001       | 401.84           | 384.31           | -0.09 (-0.44, 0.27)            | 0.630        | 285.42           | 164.32           | -1.97              | <0.001       | 3.32         | 1.42         | -2.96              | <0.001       |
|                              | (19.08, 39.90)      | (14.64, 33.86) |                      |              | (325.28, 479.34) | (312.07, 457.33) |                                |              | (248.29, 324.21) | (137.55, 194.33) | (-2.95, -0.98)     |              | (2.95, 3.78) | (1.24, 1.60) | (-3.76, -2.16)     |              |
| Middle                       | 29.81               | 24.20          | -0.69 (-0.78, -0.60) | <0.001       | 440.32           | 423.46           | -0.08 (-0.40, 0.24)            | 0.628        | 378.33           | 218.51           | -1.86              | <0.001       | 4.78         | 2.27         | -2.34              | <0.001       |
|                              | (21.02, 42.03)      | (16.26, 35.76) |                      |              | (360.60, 524.14) | (347.71, 496.89) |                                |              | (332.96, 422.60) | (188.47, 251.23) | (-2.70, -1.01)     |              | (4.25, 5.38) | (1.98, 2.62) | (-3.26, -1.42)     |              |
| Low-middle                   | 26.71               | 23.52          | -0.43 (-0.49, -0.38) | <0.001       | 403.98           | 416.81           | 0.20 (-0.17, 0.58)             | 0.296        | 410.66           | 252.91           | -1.61              | <0.001       | 5.59         | 3.01         | -2.07              | <0.001       |
|                              | (19.31, 37.79)      | (16.23, 34.32) |                      |              | (335.56, 474.68) | (345.00, 487.15) |                                |              | (348.89, 473.70) | (213.06, 292.83) | (-1.93, -1.29)     |              | (4.60, 6.53) | (2.47, 3.59) | (-2.59, -1.55)     |              |
| Low                          | 29.02               | 23.94          | -0.65 (-0.70, -0.61) | <0.001       | 459.16           | 453.20           | 0.000027 (-0.241829, 0.242469) | 1.000        | 369.61           | 265.33           | -1.12              | <0.001       | 4.92         | 3.22         | -1.44              | <0.001       |
|                              | (21.47, 39.91)      | (17.11, 34.00) |                      |              | (386.61, 534.88) | (381.27, 525.10) |                                |              | (313.55, 433.20) | (221.94, 320.26) | (-1.30, -0.95)     |              | (4.09, 5.87) | (2.60, 3.98) | (-1.57, -1.30)     |              |
| <b>21 GBD region</b>         |                     |                |                      |              |                  |                  |                                |              |                  |                  |                    |              |              |              |                    |              |
| South Asia                   | 23.61               | 21.44          | -0.33 (-0.46, -0.19) | <0.001       | 364.46           | 382.12           | 0.26 (-0.13, 0.65)             | 0.193        | 310.85           | 213.45           | -1.26              | 0.002        | 4.07         | 2.44         | -1.76              | 0.001        |
|                              | (16.53, 34.44)      | (14.48, 32.01) |                      |              | (297.52, 431.24) | (308.64, 452.86) |                                |              | (258.48, 370.39) | (174.44, 257.49) | (-2.07, -0.44)     |              | (3.26, 4.93) | (1.91, 3.08) | (-2.82, -0.69)     |              |
| East Asia                    | 24.85               | 18.79          | -0.99 (-1.07, -0.91) | <0.001       | 372.73           | 343.43           | -0.27 (-0.41, -0.14)           | <0.001       | 328.06           | 175.87           | -1.82              | <0.001       | 3.88         | 1.49         | -3.11              | <0.001       |
|                              | (17.07, 36.21)      | (11.99, 29.78) |                      |              | (288.60, 460.34) | (266.02, 424.06) |                                |              | (265.98, 400.06) | (138.86, 216.12) | (-2.75, -0.89)     |              | (3.00, 4.97) | (1.14, 1.90) | (-4.43, -1.78)     |              |
| North Africa and Middle East | 39.14               | 35.11          | -0.37 (-0.40, -0.34) | <0.001       | 505.04           | 504.49           | 0.05 (-0.19, 0.29)             | 0.687        | 485.62           | 313.85           | -1.44              | <0.001       | 6.58         | 3.79         | -1.87              | <0.001       |
|                              | (29.89, 51.82)      | (25.75, 47.74) |                      |              | (432.50, 578.35) | (429.73, 578.14) |                                |              | (415.06, 565.96) | (251.17, 390.51) | (-1.74, -1.13)     |              | (5.48, 7.79) | (2.88, 4.93) | (-2.15, -1.60)     |              |
| Western Sub-Saharan Africa   | 25.44               | 21.34          | -0.54 (-0.60, -0.48) | <0.001       | 467.52           | 463.11           | 0.00 (-0.19, 0.19)             | 0.984        | 299.00           | 223.06           | -1.00              | <0.001       | 3.80         | 2.56         | -1.34              | <0.001       |
|                              | (17.97, 35.88)      | (14.32, 31.22) |                      |              | (388.04, 549.13) | (383.43, 542.17) |                                |              | (235.74, 384.05) | (175.17, 289.38) | (-1.10, -0.91)     |              | (2.86, 5.15) | (1.88, 3.67) | (-1.44, -1.24)     |              |
| Southeast Asia               | 34.76               | 30.80          | -0.40 (-0.48, -0.32) | <0.001       | 477.96           | 461.74           | -0.08 (-0.14, -0.02)           | 0.541        | 535.90           | 325.37           | -1.67              | <0.001       | 7.01         | 3.63         | -2.22              | <0.001       |
| 175                          |                     |                |                      |              |                  |                  |                                |              |                  |                  |                    |              |              |              |                    |              |

|                     |         |              |               |        |          |          |              |        |          |               |         |        |        |        |         |        |
|---------------------|---------|--------------|---------------|--------|----------|----------|--------------|--------|----------|---------------|---------|--------|--------|--------|---------|--------|
|                     | (24.67, | (21.14,      | -0.31)        |        | (398.16, | (381.77, | (-0.33,      |        | (426.27, | (270.78,      | (-1.78, |        | (5.36, | (2.91, | (-2.35, |        |
|                     | 48.72)  | 44.24)       |               |        | 561.01)  | 542.53)  | 0.17)        |        | 639.53)  | 381.98)       | -1.56)  |        | 8.49)  | 4.42)  | -2.10)  |        |
| Eastern Sub-Saharan | 27.94   | 17.51        |               |        | 556.67   | 523.97   | -0.16        |        | 382.48   | 215.58        | -1.95   |        | 4.98   | 2.31   | -2.60   |        |
| Africa              | (20.40, | (11.30,      | -1.59 (-1.69, | <0.001 | (462.00, | (431.25, | (-0.41,      | 0.210  | (307.15, | (175.44,      | (-2.11, | <0.001 | (3.85, | (1.72, | (-2.75, | <0.001 |
|                     | 38.81)  | 27.05)       | -1.50)        |        | 651.91)  | 620.79)  | 0.09)        |        | 494.42)  | 263.52)       | -1.78)  |        | 6.72)  | 3.02)  | -2.46)  |        |
| Central Latin       | 35.42   | 26.79        |               |        | 555.42   | 495.67   | -0.34        |        | 317.67   | 178.68        | -1.77   |        | 4.27   | 2.09   | -2.14   |        |
| America             | (24.59, | (17.68,      | -0.96 (-1.05, | <0.001 | (462.62, | (417.51, | (-0.62,      | 0.015  | (293.01, | (146.62,      | (-2.04, | <0.001 | (4.00, | (1.62, | (-2.52, | <0.001 |
|                     | 50.97)  | 39.59)       | -0.87)        |        | 649.53)  | 576.61)  | -0.07)       |        | 343.24)  | 218.61)       | -1.49)  |        | 4.57)  | 2.66)  | -1.76)  |        |
| Tropical Latin      | 44.53   | 26.88        |               |        | 577.97   | 476.91   | -0.63        |        | 495.85   | 184.74        | -3.31   |        | 7.14   | 2.21   | -3.95   |        |
| America             | (32.15, | (18.40,      | -1.73 (-1.92, | <0.001 | (466.37, | (394.20, | (-0.77,      | <0.001 | (462.17, | (162.81,      | (-3.58, | <0.001 | (6.65, | (1.97, | (-4.50, | <0.001 |
|                     | 61.43)  | 38.67)       | -1.53)        |        | 681.46)  | 557.31)  | -0.49)       |        | 533.29)  | 207.65)       | -3.03)  |        | 7.65)  | 2.43)  | -3.39)  |        |
| Central Sub-Saharan | 27.38   | 19.43        |               |        | 462.65   | 421.68   | -0.25        |        | 341.67   | 212.95        | -1.62   |        | 4.53   | 2.50   | -2.09   |        |
| Africa              | (19.95, | (12.74,      | -1.18 (-1.21, | <0.001 | (370.27, | (338.47, | (-0.49,      | 0.040  | (227.73, | (155.19,      | (-1.75, | <0.001 | (2.75, | (1.59, | (-2.20, | <0.001 |
|                     | 37.72)  | 29.57)       | -1.14)        |        | 568.05)  | 513.21)  | -0.01)       |        | 485.92)  | 293.58)       | -1.48)  |        | 6.77)  | 3.80)  | -1.99)  |        |
| Western Europe      | 17.85   | 14.89 (9.26, | -0.61 (-0.70, | <0.001 | 302.03   | 291.65   | -0.05        |        | 178.47   | 84.26 (68.52, | -2.59   |        | 2.14   | 0.63   | -4.17   |        |
|                     | (11.96, | 23.52)       | -0.52)        |        | (243.51, | (235.11, | (-0.45,      | 0.791  | (160.44, | 102.14)       | (-3.02, | <0.001 | (2.02, | (0.56, | (-4.75, | <0.001 |
|                     | 26.69)  |              |               |        | 357.66)  | 350.63)  | 0.35)        |        | 196.86)  |               | -2.15)  |        | 2.28)  | 0.70)  | -3.59)  |        |
| High-income North   | 17.81   | 18.01        |               |        | 398.19   | 488.39   |              |        | 169.93   | 138.70        | -0.60   |        | 1.72   | 1.01   | -1.79   |        |
| America             | (11.09, | (11.08,      | 0.04 (-0.01,  | 0.155  | (316.47, | (396.94, | 0.97 (-0.04, | 0.059  | (146.23, | (113.07,      | (-1.22, | 0.054  | (1.61, | (0.90, | (-2.50, | <0.001 |
|                     | 28.16)  | 28.91)       | 0.09)         |        | 478.23)  | 584.29)  | 1.98)        |        | 196.95)  | 167.07)       | 0.01)   |        | 1.82)  | 1.14)  | -1.08)  |        |
| Central Asia        | 35.06   | 27.76        |               |        | 408.25   | 384.41   | -0.17        |        | 320.17   | 240.29        | -0.92   |        | 3.83   | 2.60   | -1.27   |        |
|                     | (24.71, | (18.23,      | -0.77 (-0.84, | <0.001 | (342.28, | (311.44, | (-0.30,      | 0.007  | (284.86, | (195.81,      | (-1.36, | <0.001 | (3.47, | (2.03, | (-1.89, | <0.001 |
|                     | 49.22)  | 41.01)       | -0.70)        |        | 477.92)  | 459.34)  | -0.05)       |        | 356.51)  | 293.06)       | -0.48)  |        | 4.19)  | 3.26)  | -0.65)  |        |
| Eastern Europe      | 27.76   | 27.70        |               |        | 436.55   | 513.50   |              |        | 203.81   | 215.23        | 0.30    |        | 1.83   | 1.82   | -0.09   |        |
|                     | (18.18, | (18.06,      | 0.05 (-0.04,  | 0.306  | (350.26, | (421.53, | 0.62 (0.35,  | <0.001 | (169.78, | (169.86,      | (-0.38, | 0.388  | (1.60, | (1.35, | (-0.83, | 0.801  |
|                     | 41.54)  | 42.12)       | 0.14)         |        | 522.45)  | 605.33)  | 0.89)        |        | 240.45)  | 268.64)       | 1.00)   |        | 2.03)  | 2.45)  | 0.64)   |        |
| Southern            | 25.33   | 17.70        |               |        | 606.27   | 533.35   | -0.42        |        | 466.53   | 219.52        | -2.54   |        | 6.25   | 2.38   | -3.09   |        |
| Sub-Saharan Africa  | (16.82, | (11.06,      | -1.25 (-1.34, | <0.001 | (489.71, | (429.63, | (-0.49,      | <0.001 | (376.97, | (148.94,      | (-3.81, | <0.001 | (4.84, | (1.30, | (-5.00, | 0.002  |
|                     | 37.37)  | 27.96)       | -1.15)        |        | 726.09)  | 638.01)  | -0.35)       |        | 561.75)  | 306.16)       | -1.26)  |        | 7.69)  | 3.70)  | -1.14)  |        |
| High-income Asia    | 19.11   | 15.02 (8.88, | -0.83 (-0.92, | <0.001 | 309.29   | 290.46   | -0.12        |        | 217.65   | 92.19 (72.18, | -2.92   |        | 2.60   | 0.57   | -5.14   |        |
| Pacific             | (12.67, | 25.25)       | -0.73)        |        | (252.98, | (234.70, | (-0.52,      | 0.540  | (184.62, | 114.94)       | (-3.34, | <0.001 | (2.26, | (0.46, | (-5.71, | <0.001 |
|                     | 29.44)  |              |               |        | 369.86)  | 351.08)  | 0.27)        |        | 246.27)  |               | -2.50)  |        | 2.97)  | 0.67)  | -4.56)  |        |
| Central Europe      | 30.96   | 26.50        |               |        | 448.51   | 447.62   | 0.06 (-0.31, | 0.739  | 281.64   | 171.08        | -1.71   | <0.001 | 3.08   | 1.30   | -2.87   | <0.001 |



|                        |                     |                     |                      |        |                  |                  |                    |        |                  |                       |                |              |               |                |                    |
|------------------------|---------------------|---------------------|----------------------|--------|------------------|------------------|--------------------|--------|------------------|-----------------------|----------------|--------------|---------------|----------------|--------------------|
| Andean Latin America   | (20.83, 44.69)      | (17.35, 39.88)      | -0.46                |        | (376.13, 522.09) | (371.64, 526.77) | 0.44               |        | (251.05, 316.90) | (137.62, 207.31)      | (-1.87, -1.56) | (2.90, 3.29) | (1.05, 1.60)  | (-3.12, -2.62) |                    |
|                        | 43.52               | 30.08               | -1.27 (-1.31, -1.22) | <0.001 | (395.65, 560.35) | (343.57, 497.49) | (-0.58, -0.30)     | <0.001 | (425.89, 640.15) | (177.35, 313.43)      | (-3.70, -1.76) | <0.001       | (6.19, 9.55)  | (2.18, 4.35)   | (-4.22, -1.98)     |
|                        | 37.81               | 37.34               | -0.03 (-0.06, 0.00)  | 0.071  | (391.38, 537.39) | (384.69, 542.21) | 0.09 (-0.16, 0.34) | 0.482  | (323.62, 539.22) | (258.43, 572.03)      | (-0.46, 0.02)  | 0.068        | (4.48, 8.02)  | (3.45, 8.54)   | (-0.51, 0.01)      |
| Southern Latin America | 26.64               | 19.86               | -0.98 (-1.04, -0.92) | <0.001 | (252.09, 391.47) | (212.42, 352.18) | (-0.63, -0.27)     | <0.001 | (310.49, 400.62) | (124.54, 187.89)      | (-3.33, -2.16) | <0.001       | (4.21, 5.51)  | (1.33, 2.15)   | (-4.16, -2.75)     |
|                        | 76.85               | 80.30               | 0.15 (0.08, 0.22)    | <0.001 | (482.43, 675.39) | (469.11, 681.36) | (-0.10, 0.09)      | 0.884  | (476.19, 967.17) | (478.47, 1032.57)     | (-0.08, 0.19)  | 0.413        | (5.77, 13.52) | (5.75, 14.79)  | 0.07 (-0.09, 0.23) |
| Oceania                | 19.49               | 18.59               | -0.17 (-0.31, -0.03) | 0.016  | (226.20, 393.89) | (230.61, 399.16) | 0.08 (-0.17, 0.34) | 0.527  | (110.19, 164.47) | 78.66 (56.94, 103.12) | (-1.89, -1.16) | <0.001       | (1.12, 1.65)  | (0.31, 0.60)   | (-5.10, -2.65)     |
|                        | <b>Men</b>          |                     |                      |        |                  |                  |                    |        |                  |                       |                |              |               |                |                    |
| Global                 | 24.07               | 22.12               | -0.29 (-0.32, -0.26) | <0.001 | (239.67, 345.68) | (244.84, 350.57) | 0.12 (-0.20, 0.45) | 0.467  | (333.09, 398.77) | (254.62, 322.01)      | (-1.07, -0.62) | <0.001       | (4.68, 5.65)  | (3.42, 4.39)   | (-1.27, -0.71)     |
|                        | <b>SDI category</b> |                     |                      |        |                  |                  |                    |        |                  |                       |                |              |               |                |                    |
| High                   | 15.11               | 13.75 (8.85, 21.49) | -0.31 (-0.36, -0.26) | <0.001 | (183.79, 274.63) | (214.87, 319.16) | 0.72 (-0.18, 1.62) | 0.116  | (174.18, 210.74) | (100.72, 136.20)      | (-1.96, -1.43) | <0.001       | (2.31, 2.70)  | (1.09, 1.40)   | (-2.73, -2.15)     |
|                        | 25.15               | 20.78               | -0.67 (-0.70, -0.64) | <0.001 | (220.76, 327.73) | (201.56, 302.17) | (-0.42, -0.03)     | 0.025  | (314.30, 393.38) | (205.18, 267.22)      | (-1.76, -1.10) | <0.001       | (4.34, 5.54)  | (2.66, 3.54)   | (-2.04, -1.26)     |
| Middle                 | 27.19               | 24.89               | -0.30 (-0.35, -0.25) | <0.001 | (260.56, 373.18) | (260.29, 373.31) | 0.05 (-0.23, 0.32) | 0.734  | (377.57, 471.29) | (279.13, 368.37)      | (-1.12, -0.60) | <0.001       | (5.27, 6.67)  | (3.69, 5.12)   | (-1.26, -0.68)     |
|                        | 23.51               | 22.78               | -0.12 (-0.14, -0.10) | <0.001 | (254.95, 312.60) | (255.72, 312.38) | 0.06 (-0.23, 0.36) | 0.662  | (352.13, 418.20) | (278.39, 325.24)      | (-1.29, -0.77) | 0.005        | (5.06, 6.04)  | (3.79, 4.54)   | (-1.45, -0.89)     |

|                        |         |              |               |        |          |          |              |        |          |               |         |        |        |        |         |        |
|------------------------|---------|--------------|---------------|--------|----------|----------|--------------|--------|----------|---------------|---------|--------|--------|--------|---------|--------|
|                        | 33.35)  | 32.69)       |               |        | 367.99)  | 366.90)  |              |        | 480.03)  | 380.16)       | -0.23)  | 6.99)  | 5.39)  | -0.33) |         |        |
|                        | 26.61)  | 23.31)       |               |        | 323.87)  | 320.57)  |              |        | 383.98)  | 332.59)       | -0.48)  | 5.53)  | 4.69)  | -0.56) |         |        |
| Low                    | (20.01, | (17.06,      | -0.44 (-0.49, | <0.001 | (267.71, | (265.94, | 0.03 (-0.24, | 0.851  | (324.27, | (273.88,      | (-0.61, | <0.001 | (4.55, | (3.73, | (-0.70, | <0.001 |
|                        | 36.75)  | 32.97)       | -0.40)        |        | 378.72)  | 375.42)  | 0.29)        |        | 447.87)  | 402.37)       | -0.34)  |        | 6.50)  | 5.83)  | -0.41)  |        |
| <b>21 GBD category</b> |         |              |               |        |          |          |              |        |          |               |         |        |        |        |         |        |
|                        | 19.36)  | 19.24)       |               |        | 288.23)  | 286.60)  |              |        | 286.24)  | 239.25)       | -0.56)  | 3.96)  | 3.19)  | -0.54) |         |        |
| South Asia             | (13.37, | (13.30,      | -0.03 (-0.08, | 0.166  | (229.36, | (229.42, | 0.05 (-0.24, | 0.746  | (233.39, | (202.02,      | (-1.14, | 0.063  | (3.11, | (2.61, | (-1.18, | 0.099  |
|                        | 28.50)  | 28.29)       | 0.01)         |        | 345.91)  | 343.99)  | 0.33)        |        | 339.77)  | 282.60)       | 0.03)   |        | 4.82)  | 3.90)  | 0.10)   |        |
|                        | 24.94)  | 22.90)       |               |        | 266.96)  | 238.08)  |              |        | 425.93)  | 317.34)       | -1.00)  |        | 6.01)  | 4.33)  | -1.14)  |        |
| East Asia              | (17.43, | (15.42,      | -0.28 (-0.41, | <0.001 | (211.06, | (184.96, | (-0.50,      | <0.001 | (355.05, | (253.07,      | (-1.42, | <0.001 | (4.92, | (3.35, | (-1.62, | <0.001 |
|                        | 35.05)  | 33.70)       | -0.15)        |        | 323.20)  | 291.44)  | -0.25)       |        | 498.69)  | 369.56)       | -0.59)  |        | 7.23)  | 5.21)  | -0.66)  |        |
|                        | 28.52)  | 27.05)       |               |        | 375.00)  | 384.81)  |              |        | 532.34)  | 386.32)       | -1.11)  |        | 7.79)  | 5.39)  | -1.27)  |        |
| North Africa and       | (21.28, | (19.59,      | -0.17 (-0.22, | <0.001 | (317.24, | (327.76, | 0.18 (-0.01, | 0.068  | (436.24, | (297.89,      | (-1.49, | <0.001 | (6.26, | (4.00, | (-1.64, | <0.001 |
| Middle East            | 38.68)  | 37.03)       | -0.11)        |        | 434.15)  | 443.53)  | 0.37)        |        | 645.41)  | 488.09)       | -0.74)  |        | 9.69)  | 7.07)  | -0.90)  |        |
|                        | 27.68)  | 25.26)       |               |        | 346.62)  | 355.28)  |              |        | 376.41)  | 329.20)       | -0.46)  |        | 5.38)  | 4.60)  | -0.54)  |        |
| Western                | (20.30, | (18.04,      | -0.30 (-0.32, | <0.001 | (287.49, | (294.17, | 0.15 (-0.08, | 0.206  | (302.85, | (257.08,      | (-0.56, | <0.001 | (4.18, | (3.52, | (-0.67, | <0.001 |
| Sub-Saharan Africa     | 38.20)  | 35.77)       | -0.27)        |        | 408.13)  | 415.51)  | 0.38)        |        | 469.28)  | 417.62)       | -0.36)  |        | 6.92)  | 6.00)  | -0.42)  |        |
|                        | 37.97)  | 35.07)       |               |        | 409.87)  | 394.75)  |              |        | 556.08)  | 459.76)       | -0.63)  |        | 7.81)  | 6.28)  | -0.67)  |        |
| Southeast Asia         | (28.37, | (25.54,      | -0.25 (-0.34, | <0.001 | (342.10, | (325.97, | (-0.33,      | 0.587  | (462.72, | (361.18,      | (-1.02, | 0.002  | (6.33, | (4.67, | (-1.09, | 0.002  |
|                        | 51.73)  | 48.32)       | -0.17)        |        | 478.83)  | 463.98)  | 0.19)        |        | 660.45)  | 544.63)       | -0.24)  |        | 9.42)  | 7.57)  | -0.25)  |        |
|                        | 30.23)  | 23.46)       |               |        | 363.65)  | 354.46)  |              |        | 511.73)  | 379.84)       | -1.03)  |        | 7.56)  | 5.43)  | -1.12)  |        |
| Eastern Sub-Saharan    | (22.87, | (16.98,      | -0.87 (-0.92, | <0.001 | (302.24, | (294.18, | (-0.32,      | 0.913  | (406.89, | (296.27,      | (-1.17, | <0.001 | (5.86, | (4.11, | (-1.28, | <0.001 |
| Africa                 | 41.14)  | 33.46)       | -0.81)        |        | 424.96)  | 414.81)  | 0.29)        |        | 612.89)  | 486.83)       | -0.88)  |        | 9.21)  | 7.15)  | -0.97)  |        |
|                        | 21.11)  | 17.85)       |               |        | 328.91)  | 321.33)  |              |        | 283.30)  | 188.33)       | -1.26)  |        | 4.13)  | 2.60)  | -1.42)  |        |
| Central Latin          | (14.48, | (11.81,      | -0.58 (-0.61, | <0.001 | (268.24, | (262.88, | (-0.32,      | 0.772  | (258.59, | (160.74,      | (-1.54, | <0.001 | (3.74, | (2.19, | (-1.73, | <0.001 |
| America                | 30.69)  | 27.09)       | -0.55)        |        | 387.32)  | 379.86)  | 0.24)        |        | 307.60)  | 218.70)       | -0.99)  |        | 4.50)  | 3.09)  | -1.10)  |        |
|                        | 33.64)  | 20.55)       |               |        | 428.50)  | 351.25)  |              |        | 466.73)  | 188.07)       | -3.12)  |        | 7.00)  | 2.57)  | -3.46)  |        |
| Tropical Latin         | (23.38, | (13.49,      | -1.71 (-1.79, | <0.001 | (345.14, | (285.92, | (-0.82,      | <0.001 | (430.32, | (165.84,      | (-3.43, | <0.001 | (6.45, | (2.28, | (-3.79, | <0.001 |
| America                | 48.20)  | 31.24)       | -1.63)        |        | 510.46)  | 417.68)  | -0.53)       |        | 505.05)  | 210.41)       | -2.81)  |        | 7.63)  | 2.92)  | -3.12)  |        |
|                        | 25.19)  | 19.12)       |               |        | 294.15)  | 265.99)  |              |        | 378.08)  | 283.05)       | -1.05)  |        | 5.51)  | 4.00)  | -1.16)  |        |
| Central Sub-Saharan    | (18.76, | (13.32,      | -0.94 (-0.96, | <0.001 | (227.79, | (203.84, | (-0.55,      | 0.010  | (250.68, | (190.97,      | (-1.17, | <0.001 | (3.44, | (2.49, | (-1.30, | <0.001 |
| Africa                 | 34.48)  | 28.33)       | -0.91)        |        | 362.94)  | 336.93)  | -0.07)       |        | 547.93)  | 410.19)       | -0.93)  |        | 8.28)  | 6.11)  | -1.02)  |        |
| Western Europe         | 14.80)  | 11.31 (7.13, | -0.92 (-1.00, | <0.001 | 189.14)  | 175.02)  | -0.22)       | 0.163  | 205.69)  | 82.44 (70.32, | -3.19)  | <0.001 | 2.85)  | 0.88)  | -4.16)  | <0.001 |
| 178                    |         |              |               |        |          |          |              |        |          |               |         |        |        |        |         |        |

|                             | 2019                | 2020                | Change               | Significance | 2019             | 2020                   | Change             | Significance | 2019              | 2020                   | Change         | Significance | 2019          | 2020          | Change             | Significance |
|-----------------------------|---------------------|---------------------|----------------------|--------------|------------------|------------------------|--------------------|--------------|-------------------|------------------------|----------------|--------------|---------------|---------------|--------------------|--------------|
| High-income North America   | (10.16, 21.73)      | 17.75               | -0.84                |              | (149.39, 230.17) | (139.00, 213.14)       | (-0.52, 0.09)      |              | (187.23, 226.32)  | 95.01                  | (-3.65, -2.73) |              | (2.61, 3.13)  | (0.79, 1.00)  | (-4.65, -3.66)     |              |
|                             |                     |                     |                      |              | 273.85           | 338.18                 |                    |              | 143.95            |                        | -0.74          |              | 1.68          | 1.08          | -1.44              |              |
|                             | 12.51 (7.73, 20.21) | 12.56 (7.73, 20.32) | 0.06 (-0.01, 0.12)   | 0.105        | (210.44, 340.36) | (257.99, 417.74)       | 1.03 (-0.28, 2.36) | 0.124        | (127.15, 162.60)  | 114.79 (96.39, 136.58) | (-1.21, -0.27) | 0.002        | (1.53, 1.82)  | (0.94, 1.27)  | (-2.00, -0.87)     | <0.001       |
| Central Asia                | 31.00               | 25.76               | -0.65 (-0.70, -0.59) | <0.001       | 257.18           | 234.28                 | -0.30              | <0.001       | 350.30            | 308.52                 | -0.55          |              | 4.87          | 4.23          | -0.62              |              |
|                             | (23.45, 41.50)      | (18.05, 36.59)      |                      |              | (208.32, 308.51) | (183.99, 289.12)       | (-0.45, -0.16)     |              | (314.81, 382.84)  | (253.62, 371.41)       | (-1.24, 0.15)  | 0.122        | (4.35, 5.34)  | (3.43, 5.19)  | (-1.40, 0.17)      | 0.123        |
| Eastern Europe              | 25.79               | 23.44               | -0.32 (-0.38, -0.25) | <0.001       | 231.66           | 221.45                 | -0.14              | <0.001       | 268.77            | 333.94                 | 0.82           |              | 3.61          | 4.70          |                    |              |
|                             | (18.04, 36.93)      | (16.05, 33.56)      |                      |              | (181.01, 283.46) | (173.01, 269.85)       | (-0.20, -0.07)     | <0.001       | (237.69, 296.07)  | (278.01, 437.22)       | (-0.52, 2.17)  | 0.230        | (3.15, 3.91)  | (3.81, 6.29)  | 1.00 (-0.57, 2.59) | 0.215        |
| Southern Sub-Saharan Africa | 27.58               | 21.05               | -0.92 (-0.98, -0.86) | <0.001       | 400.85           | 378.79                 | -0.16              |              | 387.37            | 270.09                 | -1.30          |              | 5.48          | 3.61          | -1.52              |              |
|                             | (19.07, 39.27)      | (14.28, 31.13)      |                      |              | (320.79, 480.06) | (304.01, 457.68)       | (-0.30, -0.02)     | 0.028        | (298.15, 496.32)  | (216.20, 341.41)       | (-1.83, -0.77) | <0.001       | (4.02, 7.19)  | (2.78, 4.68)  | (-2.13, -0.91)     | <0.001       |
| High-income Asia Pacific    | 16.53               | 12.60 (7.74, 20.97) | -0.93 (-1.05, -0.81) | <0.001       | 166.24           | 178.89                 | 0.32 (-0.10, 0.73) | 0.132        | 246.29            | 96.03 (80.70, 113.32)  | (-3.19, -3.62) | <0.001       | 3.45          | (0.82, 1.00)  | (-4.83, -4.22)     | <0.001       |
|                             | (11.41, 24.11)      |                     |                      |              | (130.93, 204.23) | (135.89, 223.87)       |                    |              | (204.09, 280.73)  |                        |                |              | (2.81, 3.96)  | (0.82, 1.17)  | (-4.83, -3.62)     | <0.001       |
| Central Europe              | 23.46               | 17.58               | -0.98 (-1.07, -0.88) | <0.001       | 221.36           | 192.39                 | -0.40              |              | 311.75            | 164.82                 | -2.22          |              | 4.34          | 2.03          | -2.63              |              |
|                             | (16.33, 33.13)      | (11.54, 26.82)      |                      |              | (177.44, 264.72) | (154.84, 233.54)       | (-0.78, -0.03)     | 0.036        | (287.26, 336.99)  | (140.98, 189.81)       | (-2.61, -1.82) | <0.001       | (4.02, 4.65)  | (1.73, 2.38)  | (-3.12, -2.14)     | <0.001       |
| Andean Latin America        | 37.82               | 28.49               | -0.98 (-1.03, -0.94) | <0.001       | 423.45           | 379.11                 | -0.37              | <0.001       | 511.36            | 327.72                 | -1.46          |              | 7.72          | 4.80          | -1.56              |              |
|                             | (29.15, 48.70)      | (20.58, 39.58)      |                      |              | (345.08, 501.03) | (311.11, 449.88)       | (-0.43, -0.31)     | <0.001       | (410.07, 631.52)  | (239.12, 441.21)       | (-2.19, -0.72) | <0.001       | (6.06, 9.76)  | (3.36, 6.66)  | (-2.35, -0.76)     | <0.001       |
| Caribbean                   | 21.72               | 19.35               | -0.38 (-0.46, -0.30) | <0.001       | 344.08           | 333.11                 | -0.09              |              | 312.62            | 241.10                 | -0.87          |              | 4.59          | 3.44          | -0.95              |              |
|                             | (14.67, 31.84)      | (12.36, 29.31)      |                      |              | (280.75, 408.20) | (275.18, 398.41)       | (-0.27, 0.09)      | 0.333        | (265.51, 367.51)  | (173.46, 344.56)       | (-1.05, -0.70) | <0.001       | (3.83, 5.47)  | (2.36, 5.20)  | (-1.15, -0.76)     | <0.001       |
| Southern Latin America      | 21.29               | 15.52               | -1.06 (-1.17, -0.96) | <0.001       | 204.09           | 186.81                 | -0.28              | <0.001       | 399.34            | 173.59                 | -2.86          |              | 5.93          | 2.32          | -3.22              |              |
|                             | (15.72, 29.15)      | (10.45, 22.52)      |                      |              | (156.34, 255.86) | (132.85, 246.94)       | (-0.34, -0.22)     | <0.001       | (341.86, 469.39)  | (132.57, 215.28)       | (-3.28, -2.44) | <0.001       | (4.97, 7.04)  | (1.68, 2.96)  | (-3.69, -2.74)     | <0.001       |
| Oceania                     | 54.10               | 55.13               | 0.06 (0.05, 0.08)    | <0.001       | 473.36           | 462.29                 | -0.06              |              | 961.45            | 970.13                 | 0.02           |              | 14.21         | 14.38         |                    |              |
|                             | (44.03, 68.64)      | (44.25, 70.55)      |                      |              | (390.28, 559.13) | (371.96, 555.18)       | (-0.13, 0.01)      | 0.113        | (615.59, 1415.66) | (615.91, 1511.16)      | (-0.25, 0.29)  | 0.868        | (8.62, 21.65) | (8.72, 23.35) | 0.03 (-0.26, 0.33) | 0.824        |
| Australasia                 | 14.78 (9.10, 21.46) | 12.09 (7.12, 18.06) | -0.69 (-0.73, -0.65) | <0.001       | 152.07           | 143.26 (93.05, 193.47) | -0.14              | 0.219        | 129.57            | 59.80 (44.83, 74.77)   | (-2.58, -2.58) | <0.001       | 1.65          | 0.54          | (-3.73, -3.73)     | <0.001       |

|                              | 2019           | 2020           | Change (2019-2020)   | 95% CI           | 2019             | 2020             | Change (2019-2020) | 95% CI           | 2019             | 2020             | Change (2019-2020) | 95% CI       | 2019          | 2020           | Change (2019-2020) | 95% CI |
|------------------------------|----------------|----------------|----------------------|------------------|------------------|------------------|--------------------|------------------|------------------|------------------|--------------------|--------------|---------------|----------------|--------------------|--------|
|                              | 23.25)         | 19.88)         | -0.64)               | (102.27, 210.47) | 199.99)          | (-0.36, 0.08)    | 0.774              | (108.16, 154.03) | 78.08)           | (-3.30, -1.86)   | <0.001             | (1.34, 2.02) | (0.36, 0.80)  | (-4.77, -2.69) | <0.001             |        |
| <b>30-34 years</b>           |                |                |                      |                  |                  |                  |                    |                  |                  |                  |                    |              |               |                |                    |        |
| <b>Women</b>                 |                |                |                      |                  |                  |                  |                    |                  |                  |                  |                    |              |               |                |                    |        |
|                              | 41.77          | 34.38          | -0.67 (-0.72, -0.62) | <0.001           | 567.27           | 548.09           | -0.05              | 0.774            | 483.22           | 307.93           | -1.53              | <0.001       | 6.82          | 3.80           | -2.08              | <0.001 |
| Global                       | (32.68, 53.04) | (25.98, 45.46) |                      |                  | (478.19, 658.97) | (460.70, 633.43) |                    |                  | (435.64, 532.20) | (270.02, 349.06) |                    |              | (6.23, 7.44)  | (3.36, 4.29)   |                    |        |
| <b>SDI category</b>          |                |                |                      |                  |                  |                  |                    |                  |                  |                  |                    |              |               |                |                    |        |
|                              | 29.29          | 27.16          | -0.25 (-0.34, -0.15) | <0.001           | 482.14           | 525.78           | 0.44 (-0.13, 1.02) | 0.128            | 276.51           | 181.45           | -1.43              | <0.001       | 3.51          | 1.70           | -2.45              | <0.001 |
| High                         | (22.13, 39.26) | (19.88, 37.60) |                      |                  | (407.71, 563.31) | (442.37, 612.19) |                    |                  | (249.38, 304.10) | (153.44, 213.34) |                    |              | (3.32, 3.67)  | (1.53, 1.91)   |                    |        |
|                              | 42.59          | 31.06          | -1.08 (-1.18, -0.97) | <0.001           | 572.80           | 519.16           | -0.27              | 0.027            | 421.70           | 243.00           | -1.95              | <0.001       | 5.56          | 2.54           | -2.71              | <0.001 |
| High-middle                  | (33.01, 55.12) | (22.58, 43.15) |                      |                  | (477.03, 672.06) | (433.37, 606.81) |                    |                  | (374.18, 471.89) | (207.24, 281.20) |                    |              | (5.01, 6.25)  | (2.23, 2.90)   |                    |        |
|                              | 45.72          | 35.05          | -0.90 (-0.97, -0.84) | <0.001           | 614.50           | 563.84           | -0.24              | 0.146            | 550.90           | 302.24           | -2.00              | <0.001       | 7.80          | 3.56           | -2.64              | <0.001 |
| Middle                       | (35.80, 58.12) | (26.36, 46.63) |                      |                  | (514.22, 715.29) | (469.60, 654.02) |                    |                  | (489.51, 615.41) | (261.31, 347.64) |                    |              | (6.98, 8.72)  | (3.09, 4.06)   |                    |        |
|                              | 42.55          | 37.39          | -0.44 (-0.52, -0.37) | <0.001           | 545.15           | 548.73           | 0.10 (-0.23, 0.42) | 0.560            | 589.27           | 379.67           | -1.49              | <0.001       | 8.90          | 5.20           | -1.77              | <0.001 |
| Low-middle                   | (33.95, 52.99) | (29.04, 47.96) |                      |                  | (461.71, 630.72) | (461.83, 638.30) |                    |                  | (506.15, 682.30) | (321.82, 441.57) |                    |              | (7.46, 10.40) | (4.35, 6.19)   |                    |        |
|                              | 48.34          | 39.01          | -0.74 (-0.78, -0.70) | <0.001           | 597.30           | 571.38           | -0.11              | 0.285            | 589.06           | 414.16           | -1.22              | <0.001       | 8.90          | 5.85           | -1.45              | <0.001 |
| Low                          | (39.61, 58.99) | (31.24, 49.00) |                      |                  | (514.83, 685.95) | (487.43, 656.73) |                    |                  | (499.79, 683.43) | (349.92, 487.29) |                    |              | (7.41, 10.49) | (4.80, 7.05)   |                    |        |
| <b>21 GBD region</b>         |                |                |                      |                  |                  |                  |                    |                  |                  |                  |                    |              |               |                |                    |        |
|                              | 37.04          | 33.89          | -0.29 (-0.41, -0.16) | <0.001           | 484.22           | 496.92           | 0.15 (-0.20, 0.51) | 0.401            | 437.00           | 307.28           | -1.20              | <0.001       | 6.37          | 4.03           | -1.55              | <0.001 |
| South Asia                   | (28.72, 47.23) | (25.87, 44.17) |                      |                  | (401.08, 569.70) | (411.89, 587.33) |                    |                  | (365.74, 514.13) | (252.94, 367.31) |                    |              | (5.18, 7.70)  | (3.17, 5.05)   |                    |        |
|                              | 36.37          | 24.73          | -1.35 (-1.47, -1.23) | <0.001           | 523.76           | 465.50           | -0.38              | <0.001           | 491.37           | 250.39           | -2.44              | <0.001       | 6.66          | 2.59           | -3.00              | <0.001 |
| East Asia                    | (27.51, 47.51) | (17.27, 35.42) |                      |                  | (423.35, 626.72) | (374.10, 556.50) |                    |                  | (401.14, 598.52) | (199.66, 302.88) |                    |              | (5.29, 8.44)  | (1.99, 3.25)   |                    |        |
|                              | 60.67          | 52.58          | -0.49 (-0.50, -0.47) | <0.001           | 710.62           | 683.73           | -0.07              | 0.272            | 643.38           | 409.40           | -1.53              | <0.001       | 9.44          | 5.36           | -1.89              | <0.001 |
| North Africa and Middle East | (50.73, 73.65) | (42.83, 65.48) |                      |                  | (618.42, 810.25) | (595.32, 777.84) |                    |                  | (547.23, 747.59) | (325.72, 500.58) |                    |              | (7.83, 11.16) | (4.12, 6.87)   |                    |        |

|                             |         |         |               |        |          |          |              |        |          |          |         |        |         |        |             |        |
|-----------------------------|---------|---------|---------------|--------|----------|----------|--------------|--------|----------|----------|---------|--------|---------|--------|-------------|--------|
| Western                     | 43.43   | 35.96   | -0.64 (-0.66, |        | 596.12   | 579.20   | -0.06        |        | 506.36   | 365.48   | -1.12   |        | 7.48    | 5.03   | -1.35       |        |
| Sub-Saharan Africa          | (35.01, | (27.94, | -0.61)        | <0.001 | (510.09, | (486.50, | (-0.23,      | 0.469  | (401.96, | (289.29, | (-1.22, | <0.001 | (5.70,  | (3.71, | (-1.47,     | <0.001 |
|                             | 53.86)  | 45.92)  |               |        | 690.27)  | 673.61)  | 0.10)        |        | 634.59)  | 462.11)  | -1.01)  |        | 9.65)   | 6.69)  | -1.23)      |        |
|                             | 52.77   | 47.28   | -0.37 (-0.41, |        | 667.87   | 640.79   | -0.10        |        | 753.65   | 472.76   | -1.59   |        | 10.84   | 5.96   | -2.06       |        |
| Southeast Asia              | (41.53, | (36.44, | -0.32)        | <0.001 | (561.58, | (537.47, | (-0.30,      | 0.284  | (619.92, | (397.27, | (-1.68, | <0.001 | (8.68,  | (4.77, | (-2.32,     | <0.001 |
|                             | 66.52)  | 60.90)  |               |        | 785.73)  | 749.15)  | 0.09)        |        | 886.69)  | 551.08)  | -1.49)  |        | 12.96)  | 7.23)  | -1.80)      |        |
|                             | 50.07   | 29.44   | -1.81 (-1.93, |        | 692.42   | 621.84   | -0.33        |        | 676.68   | 372.30   | -2.04   |        | 10.28   | 5.06   | -2.41       |        |
| Eastern Sub-Saharan Africa  | (41.20, | (22.45, | -1.69)        | <0.001 | (596.17, | (520.56, | (-0.54,      | 0.002  | (539.38, | (297.44, | (-2.16, | <0.001 | (7.97,  | (3.84, | (-2.54,     | <0.001 |
|                             | 60.90)  | 38.90)  |               |        | 794.45)  | 723.90)  | -0.12)       |        | 832.66)  | 450.74)  | -1.92)  |        | 12.94)  | 6.34)  | -2.28)      |        |
|                             | 53.34   | 37.77   | -1.18 (-1.24, |        | 765.98   | 660.69   | -0.46        |        | 431.85   | 233.25   | -1.97   |        | 6.36    | 3.00   | -2.37       |        |
| Central Latin America       | (41.50, | (27.72, | -1.13)        | <0.001 | (647.02, | (562.11, | (-0.73,      | 0.001  | (398.77, | (189.55, | (-2.49, | <0.001 | (5.95,  | (2.32, | (-2.75,     | <0.001 |
|                             | 68.82)  | 51.42)  |               |        | 885.89)  | 765.63)  | -0.19)       |        | 469.04)  | 286.22)  | -1.45)  |        | 6.78)   | 3.84)  | -1.99)      |        |
|                             | 76.04   | 41.43   | -2.08 (-2.22, |        | 851.60   | 662.46   | -0.84        |        | 844.43   | 295.47   | -3.52   |        | 13.55   | 4.12   | -4.08       |        |
| Tropical Latin America      | (61.17, | (31.72, | -1.94)        | <0.001 | (707.43, | (554.97, | (-0.99,      | <0.001 | (791.51, | (266.26, | (-3.73, | <0.001 | (12.71, | (3.71, | (-4.27,     | <0.001 |
|                             | 93.87)  | 53.62)  |               |        | 1005.66) | 772.94)  | -0.70)       |        | 904.12)  | 328.43)  | -3.31)  |        | 14.51)  | 4.52)  | -3.90)      |        |
|                             | 45.22   | 31.79   | -1.22 (-1.24, |        | 586.47   | 523.35   | -0.36        |        | 527.22   | 345.29   | -1.44   |        | 7.90    | 4.82   | -1.69       |        |
| Central Sub-Saharan Africa  | (36.94, | (24.53, | -1.20)        | <0.001 | (487.69, | (431.45, | (-0.54,      | <0.001 | (347.72, | (241.68, | (-1.56, | <0.001 | (4.82,  | (3.03, | (-1.83,     | <0.001 |
|                             | 55.15)  | 41.67)  |               |        | 693.92)  | 625.13)  | -0.17)       |        | 757.37)  | 472.31)  | -1.32)  |        | 11.91)  | 7.11)  | -1.55)      |        |
|                             | 26.12   | 20.73   | -0.79 (-0.85, |        | 412.45   | 386.84   | -0.17        |        | 249.43   | 119.94   | -2.50   |        | 3.35    | 1.11   | -3.72       |        |
| Western Europe              | (19.67, | (14.68, | -0.73)        | <0.001 | (348.85, | (320.41, | (-0.44,      | 0.206  | (226.13, | (100.65, | (-2.68, | <0.001 | (3.16,  | (1.01, | (-3.96,     | <0.001 |
|                             | 34.77)  | 29.64)  |               |        | 485.82)  | 456.48)  | 0.10)        |        | 272.48)  | 142.39)  | -2.32)  |        | 3.54)   | 1.22)  | -3.48)      |        |
|                             | 26.96   | 25.57   | -0.17 (-0.22, |        | 527.91   | 623.54   |              |        | 256.28   | 202.59   | -0.76   |        | 3.07    | 1.89   | -1.61       |        |
| High-income North America   | (19.46, | (18.08, | -0.12)        | <0.001 | (432.09, | (516.97, | 0.82 (-0.10, | 0.081  | (227.48, | (170.90, | (-1.13, | <0.001 | (2.89,  | (1.73, | (-2.27,     | <0.001 |
|                             | 37.54)  | 36.62)  |               |        | 627.15)  | 734.41)  | 1.75)        |        | 287.26)  | 236.69)  | -0.39)  |        | 3.25)   | 2.09)  | -0.94)      |        |
|                             | 52.87   | 41.43   | -0.83 (-0.87, |        | 598.69   | 545.68   | -0.29        |        | 473.57   | 370.25   | -0.84   |        | 6.27    | 4.62   | -1.05       |        |
| Central Asia                | (42.46, | (31.43, | -0.78)        | <0.001 | (510.40, | (451.95, | (-0.37,      | <0.001 | (427.51, | (309.69, | (-1.13, | <0.001 | (5.77,  | (3.78, | (-1.45,     | <0.001 |
|                             | 67.21)  | 55.79)  |               |        | 689.95)  | 648.69)  | -0.21)       |        | 524.51)  | 441.84)  | -0.55)  |        | 6.79)   | 5.65)  | -0.64)      |        |
|                             | 44.82   | 42.72   | -0.14 (-0.20, |        | 616.61   | 681.68   |              |        | 297.80   | 345.99   | 0.66    |        | 3.15    | 3.78   |             |        |
| Eastern Europe              | (33.79, | (32.16, | -0.09)        | <0.001 | (508.02, | (572.05, | 0.39 (0.17,  | <0.001 | (252.37, | (275.45, | (-0.03, | 0.061  | (2.71,  | (2.89, | 0.88 (0.18, | 0.013  |
|                             | 60.17)  | 58.16)  |               |        | 736.03)  | 808.57)  | 0.61)        |        | 348.29)  | 430.43)  | 1.35)   |        | 3.46)   | 5.05)  | 1.58)       |        |
|                             | 40.18   | 26.40   | -1.46 (-1.56, |        | 741.55   | 635.09   | -0.53        |        | 702.03   | 300.16   | -2.73   |        | 10.60   | 3.78   | -3.32       |        |
| Southern Sub-Saharan Africa | (30.50, | (19.09, | -1.36)        | <0.001 | (614.88, | (523.94, | (-0.60,      | <0.001 | (562.82, | (210.54, | (-4.47, | 0.003  | (8.15,  | (2.26, | (-5.51,     | 0.004  |
|                             | 52.99)  | 36.89)  |               |        | 885.09)  | 757.30)  | -0.47)       |        | 855.73)  | 408.41)  | -0.96)  |        | 13.05)  | 5.66)  | -1.07)      |        |

|                          | 2019            | 2020            | Change (2019-2020)   | Significance | 2019              | 2020              | Change (2019-2020) | Significance | 2019              | 2020                   | Change (2019-2020) | Significance | 2019          | 2020          | Change (2019-2020) | Significance |
|--------------------------|-----------------|-----------------|----------------------|--------------|-------------------|-------------------|--------------------|--------------|-------------------|------------------------|--------------------|--------------|---------------|---------------|--------------------|--------------|
| High-income Asia Pacific | 32.78           | 27.19           | -0.64 (-0.79, -0.48) | <0.001       | 424.04            | 402.84            | -0.15              |              | 320.61            | 135.73                 | -2.89              |              | 4.33          | 1.09          | -4.64              |              |
|                          | (25.06, 43.99)  | (19.56, 37.87)  |                      |              | (357.14, 502.13)  | (334.69, 481.98)  | (-0.39, 0.08)      | 0.205        | (279.65, 357.85)  | (111.37, 164.59)       | (-3.12, -2.66)     | <0.001       | (3.79, 4.81)  | (0.94, 1.25)  | (-4.98, -4.29)     | <0.001       |
| Central Europe           | 47.50           | 36.37           | -0.90 (-1.00, -0.80) | <0.001       | 640.51            | 604.45            | -0.14              |              | 448.18            | 240.89                 | -2.06              |              | 5.75          | 2.18          | -3.26              |              |
|                          | (37.02, 61.97)  | (26.49, 50.45)  |                      |              | (543.76, 741.77)  | (508.84, 704.02)  | (-0.43, 0.16)      | 0.365        | (404.13, 493.01)  | (196.51, 289.62)       | (-2.23, -1.89)     | <0.001       | (5.43, 6.07)  | (1.80, 2.64)  | (-3.52, -2.99)     | <0.001       |
| Andean Latin America     | 60.06           | 40.78           | -1.33 (-1.37, -1.29) | <0.001       | 707.82            | 599.32            | -0.55              |              | 637.84            | 304.97                 | -2.53              |              | 10.08         | 4.37          | -2.86              |              |
|                          | (49.51, 72.48)  | (31.15, 53.17)  |                      |              | (604.54, 811.37)  | (506.46, 701.33)  | (-0.69, -0.40)     | <0.001       | (516.71, 781.42)  | (230.41, 391.46)       | (-3.46, -1.59)     | <0.001       | (8.04, 12.51) | (3.07, 5.96)  | (-3.97, -1.74)     | <0.001       |
| Caribbean                | 62.61           | 61.37           | -0.07 (-0.11, -0.02) | 0.004        | 676.51            | 656.19            | -0.06              |              | 664.62            | 590.14                 | -0.39              |              | 10.59         | 9.29          | -0.44              |              |
|                          | (51.57, 78.48)  | (50.30, 78.31)  |                      |              | (573.96, 785.17)  | (552.07, 771.39)  | (-0.26, 0.13)      | 0.525        | (525.70, 833.13)  | (412.42, 829.54)       | (-0.68, -0.10)     | 0.009        | (8.15, 13.49) | (6.14, 13.41) | (-0.77, -0.10)     | 0.011        |
| Southern Latin America   | 41.98           | 30.00           | -1.14 (-1.18, -1.09) | <0.001       | 482.81            | 410.51            | -0.54              |              | 521.32            | 225.16                 | -2.75              |              | 7.90          | 2.82          | -3.37              |              |
|                          | (33.22, 52.80)  | (22.51, 40.74)  |                      |              | (397.92, 590.02)  | (329.61, 502.53)  | (-0.78, -0.30)     | <0.001       | (468.24, 575.11)  | (184.98, 267.84)       | (-3.27, -2.22)     | <0.001       | (7.12, 8.81)  | (2.26, 3.39)  | (-4.05, -2.68)     | <0.001       |
| Oceania                  | 107.72          | 113.17          | 0.17 (0.15, 0.20)    | <0.001       | 902.71            | 907.62            | 0.02 (-0.06, 0.10) | 0.695        | 838.11            | 853.84                 | 0.04               |              | 11.59         | 11.84         | 0.04 (-0.22, 0.32) | 0.745        |
|                          | (94.00, 123.66) | (98.88, 131.13) |                      |              | (777.96, 1036.68) | (770.66, 1050.52) |                    |              | (602.61, 1175.04) | (571.79, 1238.04)      | (-0.17, 0.25)      | 0.725        | (7.44, 17.68) | (7.31, 18.32) |                    |              |
| Australasia              | 26.99           | 24.50           | -0.34 (-0.40, -0.29) | <0.001       | 411.15            | 402.58            | -0.04              |              | 191.94            | 118.06 (90.81, 148.08) | -1.59              |              | 2.20          | 0.92          | -3.02              |              |
|                          | (19.20, 38.38)  | (16.77, 35.81)  |                      |              | (317.96, 512.30)  | (307.78, 510.72)  | (-0.19, 0.10)      | 0.561        | (160.07, 227.12)  |                        | (-2.23, -0.94)     | <0.001       | (1.84, 2.58)  | (0.68, 1.21)  | (-3.91, -2.12)     | <0.001       |
| <b>Men</b>               |                 |                 |                      |              |                   |                   |                    |              |                   |                        |                    |              |               |               |                    |              |
| Global                   | 39.55           | 36.02           | -0.33 (-0.36, -0.30) | <0.001       | 420.68            | 419.16            | 0.06 (-0.25, 0.37) | 0.699        | 565.51            | 450.84                 | -0.77              |              | 8.85          | 6.86          | -0.88              |              |
|                          | (31.62, 49.21)  | (28.36, 45.94)  |                      |              | (353.48, 489.28)  | (351.30, 488.22)  |                    |              | (520.43, 615.53)  | (403.85, 501.89)       | (-1.12, -0.42)     | <0.001       | (8.10, 9.60)  | (6.13, 7.65)  | (-1.32, -0.45)     | <0.001       |
| <b>SDI category</b>      |                 |                 |                      |              |                   |                   |                    |              |                   |                        |                    |              |               |               |                    |              |
| High                     | 25.49           | 23.53           | -0.28 (-0.38, -0.19) | <0.001       | 330.60            | 372.48            | 0.61 (-0.21, 1.44) | 0.143        | 297.40            | 193.71                 | -1.46              |              | 4.38          | 2.45          | -1.92              |              |
|                          | (19.98, 33.53)  | (17.88, 32.18)  |                      |              | (274.50, 389.00)  | (309.11, 437.86)  |                    |              | (275.48, 319.63)  | (169.83, 219.67)       | (-1.73, -1.20)     | <0.001       | (4.12, 4.65)  | (2.17, 2.82)  | (-2.08, -1.75)     | <0.001       |
| High-middle              | 42.31           | 34.19           | -0.75 (-0.79, -0.70) | <0.001       | 407.57            | 368.62            | -0.29              |              | 566.59            | 428.53                 | -0.94              |              | 8.80          | 6.46          | -1.04              |              |
|                          | (33.66, 52.84)  | (26.32, 44.38)  |                      |              | (337.92, 479.59)  | (304.12, 439.39)  | (-0.49, -0.08)     | 0.006        | (508.19, 636.01)  | (374.70, 488.68)       | (-1.47, -0.40)     | 0.001        | (7.83, 9.87)  | (5.54, 7.46)  | (-1.64, -0.43)     | 0.001        |
| Middle                   | 44.71           | 40.11           | -0.39 (-0.42, -0.36) | <0.001       | 462.90            | 445.99            | -0.08              | 0.519        | 657.62            | 502.21                 | -0.93              | <0.001       | 10.33         | 7.65          | -1.04              | <0.001       |

|                              |                |                |                      |        |                  |                  |                    |        |                   |                  |                |               |                |                |                |        |
|------------------------------|----------------|----------------|----------------------|--------|------------------|------------------|--------------------|--------|-------------------|------------------|----------------|---------------|----------------|----------------|----------------|--------|
|                              | (35.57, 55.82) | (31.49, 50.72) | -0.35                |        | (388.66, 542.06) | (373.23, 521.86) | (-0.33, 0.17)      |        | (594.86, 733.53)  | (430.74, 565.88) | (-1.25, -0.60) | (9.26, 11.62) | (6.49, 8.68)   | (-1.43, -0.65) |                |        |
|                              | 38.47          | 37.64          |                      |        | 431.35           | 437.10           |                    |        | 656.68            | 533.75           | -0.64          | 10.53         | 8.37           | -0.73          |                |        |
| Low-middle                   | (31.17, 47.86) | (29.95, 47.21) | -0.08 (-0.12, -0.05) | <0.001 | (364.38, 500.17) | (368.90, 510.79) | 0.11 (-0.15, 0.37) | 0.409  | (575.49, 745.45)  | (461.51, 611.49) | (-0.86, -0.43) | <0.001        | (9.16, 11.99)  | (7.19, 9.76)   | (-0.99, -0.46) | <0.001 |
|                              | 43.43          | 37.84          |                      |        | 461.27           | 449.73           |                    |        | 557.30            | 459.46           | -0.68          |               | 8.82           | 7.11           | -0.74          |        |
| Low                          | (35.48, 53.06) | (30.47, 47.11) | -0.47 (-0.51, -0.44) | <0.001 | (396.37, 532.04) | (386.64, 517.90) | (-0.27, 0.17)      | 0.669  | (476.07, 648.82)  | (381.86, 548.69) | (-0.77, -0.58) | <0.001        | (7.42, 10.41)  | (5.76, 8.72)   | (-0.84, -0.64) | <0.001 |
| <b>21 GBD region</b>         |                |                |                      |        |                  |                  |                    |        |                   |                  |                |               |                |                |                |        |
|                              | 31.22          | 32.32          |                      |        | 384.68           | 394.39           |                    |        | 498.95            | 426.52           | -0.51          |               | 7.86           | 6.57           | -0.60          |        |
| South Asia                   | (24.27, 40.78) | (25.28, 41.81) | 0.11 (0.07, 0.15)    | <0.001 | (318.33, 451.69) | (327.00, 470.97) | 0.14 (-0.14, 0.41) | 0.327  | (415.01, 582.32)  | (363.85, 493.35) | (-0.72, -0.30) | <0.001        | (6.45, 9.28)   | (5.44, 7.71)   | (-0.82, -0.38) | <0.001 |
|                              | 38.90          | 36.27          |                      |        | 402.78           | 366.71           |                    |        | 685.90            | 564.50           | -0.56          |               | 10.80          | 8.75           | -0.61          |        |
| East Asia                    | (29.62, 50.39) | (27.33, 47.38) | -0.27 (-0.38, -0.16) | <0.001 | (330.19, 479.69) | (296.28, 442.14) | (-0.46, -0.15)     | <0.001 | (577.03, 813.86)  | (436.55, 663.08) | (-1.02, -0.10) | 0.018         | (8.95, 13.07)  | (6.48, 10.45)  | (-1.10, -0.11) | 0.018  |
|                              | 44.37          | 40.73          |                      |        | 518.76           | 525.24           |                    |        | 594.99            | 409.97           | -1.24          |               | 9.27           | 5.98           | -1.47          |        |
| North Africa and Middle East | (36.56, 54.67) | (32.73, 51.33) | -0.28 (-0.30, -0.26) | <0.001 | (445.53, 593.66) | (450.52, 601.25) | 0.12 (-0.05, 0.29) | 0.168  | (482.82, 731.07)  | (328.83, 524.61) | (-1.39, -1.10) | <0.001        | (7.32, 11.79)  | (4.61, 7.92)   | (-1.66, -1.28) | <0.001 |
|                              | 41.61          | 38.75          |                      |        | 502.35           | 503.45           |                    |        | 469.69            | 416.14           | -0.41          |               | 7.24           | 6.28           | -0.47          |        |
| Western Sub-Saharan Africa   | (33.22, 52.06) | (30.46, 48.95) | -0.24 (-0.27, -0.21) | <0.001 | (428.69, 580.01) | (427.99, 576.03) | 0.04 (-0.15, 0.23) | 0.657  | (371.22, 590.45)  | (327.37, 520.09) | (-0.50, -0.31) | <0.001        | (5.52, 9.43)   | (4.74, 8.13)   | (-0.57, -0.37) | <0.001 |
|                              | 66.63          | 60.64          |                      |        | 598.73           | 576.50           |                    |        | 902.13            | 736.02           | -0.69          |               | 14.04          | 11.17          | -0.78          |        |
| Southeast Asia               | (55.03, 80.68) | (49.32, 74.22) | -0.32 (-0.34, -0.30) | <0.001 | (505.99, 701.29) | (484.77, 677.92) | (-0.28, 0.10)      | 0.353  | (772.92, 1043.74) | (608.56, 865.96) | (-1.01, -0.38) | <0.001        | (11.73, 16.53) | (9.05, 13.35)  | (-1.12, -0.44) | <0.001 |
|                              | 49.58          | 36.66          |                      |        | 519.36           | 490.61           |                    |        | 702.97            | 512.50           | -1.10          |               | 11.33          | 8.02           | -1.18          |        |
| Eastern Sub-Saharan Africa   | (40.30, 61.19) | (29.06, 46.28) | -1.03 (-1.08, -0.99) | <0.001 | (446.04, 596.80) | (418.25, 566.91) | (-0.39, 0.11)      | 0.265  | (575.51, 838.05)  | (398.33, 650.84) | (-1.21, -0.98) | <0.001        | (9.07, 13.76)  | (6.09, 10.43)  | (-1.30, -1.07) | <0.001 |
|                              | 32.45          | 26.43          |                      |        | 435.14           | 414.80           |                    |        | 370.57            | 252.28           | -1.25          |               | 5.89           | 3.82           | -1.40          |        |
| Central Latin America        | (25.24, 42.10) | (19.69, 36.18) | -0.71 (-0.77, -0.65) | <0.001 | (369.09, 507.11) | (350.32, 480.71) | (-0.40, 0.10)      | 0.247  | (340.81, 399.95)  | (212.92, 296.96) | (-1.75, -0.75) | <0.001        | (5.41, 6.36)   | (3.18, 4.61)   | (-1.92, -0.88) | <0.001 |
|                              | 64.15          | 32.81          |                      |        | 609.10           | 462.23           |                    |        | 851.04            | 290.26           | -3.54          |               | 14.16          | 4.44           | -3.84          |        |
| Tropical Latin America       | (50.86, 80.14) | (24.72, 43.41) | -2.31 (-2.42, -2.21) | <0.001 | (491.11, 728.99) | (380.92, 545.23) | (-1.02, -0.84)     | <0.001 | (778.59, 935.94)  | (259.59, 323.84) | (-3.77, -3.32) | <0.001        | (12.97, 15.63) | (3.94, 4.98)   | (-4.10, -3.58) | <0.001 |

|                             |       |       |                      |        |        |        |                    |        |        |        |       |        |       |       |                   |        |
|-----------------------------|-------|-------|----------------------|--------|--------|--------|--------------------|--------|--------|--------|-------|--------|-------|-------|-------------------|--------|
| Central Sub-Saharan Africa  | 43.59 | 32.80 | -0.98 (-1.00, -0.95) | <0.001 | 434.76 | 385.03 | -0.37              | 0.005  | 540.87 | 403.61 | -1.03 | 0.001  | 8.63  | 6.28  | -1.12             | <0.001 |
| Western Europe              | 22.26 | 16.31 | -1.06 (-1.13, -1.00) | <0.001 | 271.57 | 240.45 | -0.37              | 0.012  | 284.36 | 121.38 | -2.98 | <0.001 | 4.33  | 1.51  | -3.65             | <0.001 |
| High-income North America   | 19.63 | 18.25 | -0.24 (-0.31, -0.16) | <0.001 | 368.34 | 436.46 | 0.92 (-0.44, 2.29) | 0.188  | 225.68 | 169.09 | -0.97 | <0.001 | 3.07  | 1.93  | -1.53             | <0.001 |
| Central Asia                | 55.05 | 45.63 | -0.63 (-0.70, -0.56) | <0.001 | 437.88 | 397.87 | -0.33              | <0.001 | 570.71 | 524.41 | -0.37 | 0.055  | 8.74  | 8.02  | -0.32             | 0.231  |
| Eastern Europe              | 49.96 | 46.85 | -0.21 (-0.29, -0.14) | <0.001 | 379.42 | 355.90 | -0.22              | <0.001 | 473.31 | 643.57 | 1.04  | <0.001 | 7.14  | 10.21 | 1.21 (0.58, 1.84) | <0.001 |
| Southern Sub-Saharan Africa | 45.57 | 30.74 | -1.36 (-1.43, -1.30) | <0.001 | 552.38 | 498.12 | -0.33              | <0.001 | 747.52 | 425.86 | -2.05 | 0.004  | 12.03 | 6.45  | -2.27             | 0.006  |
| High-income Asia Pacific    | 35.87 | 30.80 | -0.52 (-0.77, -0.27) | <0.001 | 287.56 | 295.79 | 0.13 (-0.04, 0.30) | 0.144  | 415.89 | 174.09 | -2.98 | <0.001 | 6.49  | 2.21  | -3.69             | <0.001 |
| Central Europe              | 43.38 | 28.45 | -1.45 (-1.48, -1.43) | <0.001 | 356.12 | 294.23 | -0.61              | <0.001 | 551.87 | 272.38 | -2.46 | <0.001 | 8.61  | 3.84  | -2.86             | <0.001 |
| Andean Latin America        | 49.86 | 37.28 | -1.01 (-1.05, -0.96) | <0.001 | 580.94 | 499.77 | -0.51              | <0.001 | 620.99 | 366.45 | -1.85 | <0.001 | 10.12 | 5.73  | -2.00             | <0.001 |
| Caribbean                   | 42.46 | 38.15 | -0.36 (-0.42, -0.29) | <0.001 | 466.87 | 444.29 | -0.12              | 0.467  | 518.22 | 416.01 | -0.61 | 0.001  | 8.46  | 6.68  | -0.64             | 0.001  |
| Southern Latin America      | 34.60 | 23.41 | -1.33 (-1.40, -1.26) | <0.001 | 311.86 | 263.04 | -0.56              | <0.001 | 549.42 | 247.46 | -2.71 | <0.001 | 8.87  | 3.64  | -3.02             | <0.001 |
|                             | 42.51 | 30.83 |                      |        | 379.05 | 330.23 | -0.48              |        | 624.72 | 303.41 | -2.28 |        | 10.19 | 4.62  | -2.52             |        |



|                      | 2019            | 2020            | Change (2019-2020)   | 95% CI | 2019             | 2020           | Change (2019-2020) | 95% CI            | 2019              | 2020                  | Change (2019-2020) | 95% CI            | 2019           | 2020           | Change (2019-2020) | 95% CI         |
|----------------------|-----------------|-----------------|----------------------|--------|------------------|----------------|--------------------|-------------------|-------------------|-----------------------|--------------------|-------------------|----------------|----------------|--------------------|----------------|
| Oceania              | 93.77           | 94.54           | 0.03 (0.01, 0.05)    | 0.003  | 728.49           | 717.02         | -0.05              | (620.47, 849.67)  | 1176.34           | 1168.98               | -0.06              | (778.61, 1769.00) | 18.56          | 18.46          | -0.06              | (11.43, 28.78) |
|                      | (81.29, 107.20) | (80.94, 109.26) |                      |        | (592.66, 841.85) | (-0.14, 0.04)  | 0.317              | (778.61, 1769.00) | (755.31, 1752.26) | (-0.11, 0.00)         | 0.065              | (11.43, 28.78)    | (11.19, 28.65) | (-0.12, 0.01)  | 0.082              |                |
|                      | 21.31           | 16.73           | -0.83 (-0.86, -0.79) | <0.001 | 229.99           | 207.15         | -0.29              | (162.48, 302.85)  | 182.21            | 89.49 (66.04, 116.86) | -2.50              | (149.45, 218.66)  | 2.56           | 0.98           | -3.37              | (2.07, 3.12)   |
| Australasia          | (15.52, 29.75)  | (11.27, 24.72)  |                      |        | (142.28, 276.62) | (-0.76, 0.18)  | 0.222              | (149.45, 218.66)  |                   | (-2.98, -2.01)        | <0.001             | (2.07, 3.12)      | (0.67, 1.37)   | (-4.04, -2.69) | <0.001             |                |
| <b>35-39 years</b>   |                 |                 |                      |        |                  |                |                    |                   |                   |                       |                    |                   |                |                |                    |                |
| <b>Women</b>         |                 |                 |                      |        |                  |                |                    |                   |                   |                       |                    |                   |                |                |                    |                |
| Global               | 62.04           | 52.05           | -0.60 (-0.64, -0.56) | <0.001 | 784.25           | 747.32         | -0.11              | (682.45, 902.21)  | 790.82            | 496.23                | -1.59              | (720.43, 866.39)  | 12.81          | 7.28           | -1.95              | (11.71, 14.07) |
|                      | (48.35, 78.83)  | (40.02, 67.18)  |                      |        | (650.49, 859.55) | (-0.39, 0.18)  | 0.463              | (720.43, 866.39)  | (441.64, 556.94)  | (-1.77, -1.42)        | <0.001             | (11.71, 14.07)    | (6.44, 8.12)   | (-2.12, -1.77) | <0.001             |                |
| <b>SDI category</b>  |                 |                 |                      |        |                  |                |                    |                   |                   |                       |                    |                   |                |                |                    |                |
| High                 | 43.65           | 40.51           | -0.24 (-0.31, -0.18) | <0.001 | 663.76           | 711.70         | 0.38 (-0.16, 0.92) | 0.173             | 414.04            | 275.24                | -1.36              | (380.22, 449.33)  | 6.03           | 3.21           | -2.11              | (5.76, 6.31)   |
|                      | (32.23, 58.15)  | (28.96, 54.27)  |                      |        | (573.69, 769.01) |                |                    |                   | (380.22, 449.33)  | (237.28, 316.83)      | (-1.61, -1.12)     | <0.001            | (5.76, 6.31)   | (2.84, 3.68)   | (-2.25, -1.98)     | <0.001         |
| High-middle          | 62.49           | 44.60           | -1.15 (-1.21, -1.08) | <0.001 | 802.57           | 709.95         | -0.38              | (691.78, 932.45)  | 711.56            | 388.25                | -2.02              | (637.16, 802.27)  | 11.00          | 5.06           | -2.59              | (9.81, 12.44)  |
|                      | (48.29, 79.44)  | (33.24, 58.95)  |                      |        | (691.78, 932.45) | (-0.55, -0.21) | <0.001             | (637.16, 802.27)  | (339.52, 442.10)  | (-2.36, -1.68)        | <0.001             | (9.81, 12.44)     | (4.48, 5.72)   | (-3.08, -2.11) | <0.001             |                |
| Middle               | 66.45           | 52.96           | -0.77 (-0.83, -0.70) | <0.001 | 844.51           | 774.79         | -0.28              | (729.86, 979.94)  | 946.90            | 502.51                | -2.14              | (841.43, 1074.38) | 15.51          | 7.21           | -2.58              | (13.62, 17.87) |
|                      | (50.99, 85.14)  | (40.37, 69.03)  |                      |        | (670.59, 894.21) | (-0.37, -0.20) | <0.001             | (841.43, 1074.38) | (437.50, 570.31)  | (-2.26, -2.02)        | <0.001             | (13.62, 17.87)    | (6.25, 8.27)   | (-2.70, -2.46) | <0.001             |                |
| Low-middle           | 65.19           | 58.91           | -0.34 (-0.41, -0.28) | <0.001 | 753.22           | 747.61         | 0.03 (-0.25, 0.31) | 0.816             | 909.92            | 614.21                | -1.33              | (797.65, 1032.69) | 15.42          | 9.74           | -1.58              | (13.33, 17.73) |
|                      | (51.26, 81.92)  | (45.75, 75.48)  |                      |        | (656.65, 859.47) |                |                    |                   | (797.65, 1032.69) | (523.51, 710.59)      | (-1.50, -1.15)     | <0.001            | (13.33, 17.73) | (8.16, 11.47)  | (-1.74, -1.42)     | <0.001         |
| Low                  | 77.06           | 62.01           | -0.75 (-0.80, -0.71) | <0.001 | 826.12           | 773.45         | -0.19              | (730.75, 934.01)  | 983.40            | 684.51                | -1.24              | (835.42, 1137.68) | 16.80          | 11.14          | -1.42              | (13.94, 19.72) |
|                      | (62.56, 94.35)  | (49.77, 77.74)  |                      |        | (681.33, 883.56) | (-0.36, -0.03) | 0.020              | (835.42, 1137.68) | (580.38, 811.25)  | (-1.34, -1.14)        | <0.001             | (13.94, 19.72)    | (9.19, 13.51)  | (-1.50, -1.33) | <0.001             |                |
| <b>21 GBD region</b> |                 |                 |                      |        |                  |                |                    |                   |                   |                       |                    |                   |                |                |                    |                |
| South Asia           | 57.05           | 53.47           | -0.22 (-0.28, -0.16) | <0.001 | 665.98           | 673.46         | 0.10 (-0.22, 0.43) | 0.532             | 639.79            | 479.79                | -1.07              | (539.93, 754.76)  | 10.46          | 7.33           | -1.31              | (8.68, 12.68)  |
|                      | (43.16, 73.69)  | (40.13, 70.25)  |                      |        | (570.82, 778.53) |                |                    |                   | (539.93, 754.76)  | (392.27, 579.64)      | (-1.61, -0.54)     | <0.001            | (8.68, 12.68)  | (5.74, 9.18)   | (-1.92, -0.69)     | <0.001         |
| East Asia            | 51.56           | 32.64           | -1.58 (-1.65, -1.51) | <0.001 | 720.63           | 608.49         | -0.57              | (605.92, 934.01)  | 918.51            | 399.52                | -2.75              | (754.20, 1137.68) | 14.93          | 5.23           | -3.53              | (11.85, 19.72) |
|                      | (37.96, 94.35)  | (23.74, 77.74)  |                      |        | (605.92, 934.01) | (-0.78, -0.36) | <0.001             | (754.20, 1137.68) | (322.93, 811.25)  | (-3.04, -2.75)        | <0.001             | (11.85, 19.72)    | (4.05, 13.51)  | (-3.75, -3.53) | <0.001             |                |

|                              | 68.84)          | 45.00)         |                      |        | 848.98)            | 722.52)           | -0.36)             |        | 1118.63)           | 480.72)          | -2.46)         |        | 18.75)         | 6.69)          | -3.30)            |        |
|------------------------------|-----------------|----------------|----------------------|--------|--------------------|-------------------|--------------------|--------|--------------------|------------------|----------------|--------|----------------|----------------|-------------------|--------|
| North Africa and Middle East | 92.30           | 78.75          |                      |        | 1010.28            | 960.18            | -0.15              |        | 1059.82            | 656.86           | -1.63          |        | 17.59          | 9.94           | -1.94             |        |
|                              | (76.55, 111.84) | (63.38, 99.15) | -0.54 (-0.58, -0.51) | <0.001 | (901.62, 1138.71)  | (851.99, 1080.69) | (-0.26, -0.04)     | 0.010  | (902.48, 1231.45)  | (531.90, 791.90) | (-1.80, -1.46) | <0.001 | (14.64, 20.61) | (7.70, 12.47)  | (-2.15, -1.72)    | <0.001 |
| Western Sub-Saharan Africa   | 71.48           | 59.19          |                      |        | 837.40             | 788.44            | -0.16              |        | 885.97             | 614.73           | -1.26          |        | 14.95          | 9.82           | -1.44             |        |
|                              | (57.92, 88.46)  | (47.15, 74.76) | -0.66 (-0.69, -0.62) | <0.001 | (734.99, 951.31)   | (686.79, 900.61)  | (-0.25, -0.08)     | <0.001 | (700.35, 1114.86)  | (485.26, 777.85) | (-1.33, -1.19) | <0.001 | (11.45, 19.49) | (7.42, 12.89)  | (-1.58, -1.30)    | <0.001 |
| Southeast Asia               | 78.92           | 72.00          |                      |        | 954.39             | 913.95            | -0.11              |        | 1261.01            | 841.77           | -1.36          |        | 20.72          | 12.75          | -1.63             |        |
|                              | (61.12, 100.15) | (55.16, 93.46) | -0.32 (-0.35, -0.29) | <0.001 | (827.21, 1100.11)  | (787.74, 1057.10) | (-0.23, 0.00)      | 0.055  | (1077.13, 1459.16) | (701.86, 985.09) | (-1.45, -1.27) | <0.001 | (17.46, 24.46) | (10.40, 15.40) | (-1.73, -1.53)    | <0.001 |
| Eastern Sub-Saharan Africa   | 83.46           | 48.87          |                      |        | 938.94             | 797.20            | -0.54              |        | 1139.07            | 629.74           | -2.03          |        | 19.58          | 10.09          | -2.25             |        |
|                              | (67.39, 102.15) | (38.08, 63.59) | -1.85 (-1.92, -1.77) | <0.001 | (826.66, 1063.40)  | (689.66, 916.33)  | (-0.73, -0.34)     | <0.001 | (931.11, 1400.52)  | (506.81, 769.15) | (-2.10, -1.95) | <0.001 | (15.49, 24.41) | (7.73, 12.78)  | (-2.37, -2.14)    | <0.001 |
| Central Latin America        | 79.59           | 53.41          |                      |        | 1047.40            | 874.87            | -0.56              |        | 657.38             | 342.64           | -2.12          |        | 10.86          | 5.06           | -2.43             |        |
|                              | (62.10, 102.99) | (38.38, 72.61) | -1.38 (-1.49, -1.26) | <0.001 | (915.53, 1199.34)  | (755.31, 1012.51) | (-0.73, -0.40)     | <0.001 | (616.54, 701.80)   | (281.36, 416.80) | (-2.38, -1.85) | <0.001 | (10.27, 11.53) | (3.96, 6.37)   | (-2.81, -2.06)    | <0.001 |
| Tropical Latin America       | 123.75          | 64.02          |                      |        | 1245.28            | 911.22            | -1.06              |        | 1422.38            | 506.86           | -3.45          |        | 25.38          | 8.22           | -3.77             |        |
|                              | (96.53, 157.49) | (48.36, 82.85) | -2.25 (-2.39, -2.12) | <0.001 | (1059.83, 1452.00) | (780.88, 1059.98) | (-1.18, -0.94)     | <0.001 | (1327.99, 1518.25) | (460.48, 556.51) | (-3.64, -3.25) | <0.001 | (23.70, 27.13) | (7.39, 9.00)   | (-4.00, -3.54)    | <0.001 |
| Central Sub-Saharan Africa   | 72.04           | 51.20          |                      |        | 821.66             | 705.92            | -0.49              |        | 905.45             | 603.12           | -1.41          |        | 15.38          | 9.80           | -1.56             |        |
|                              | (59.30, 89.37)  | (40.01, 66.47) | -1.18 (-1.20, -1.17) | <0.001 | (705.04, 944.46)   | (595.26, 824.27)  | (-0.59, -0.39)     | <0.001 | (620.37, 1290.55)  | (417.73, 845.74) | (-1.53, -1.29) | <0.001 | (9.76, 22.87)  | (6.25, 14.41)  | (-1.72, -1.41)    | <0.001 |
| Western Europe               | 37.35           | 28.33          |                      |        | 552.56             | 510.38            | -0.23              |        | 365.51             | 169.24           | -2.61          |        | 5.58           | 1.89           | -3.67             |        |
|                              | (27.82, 48.81)  | (19.49, 39.27) | -0.95 (-1.00, -0.90) | <0.001 | (473.11, 638.07)   | (433.47, 595.15)  | (-0.47, 0.01)      | 0.056  | (336.60, 397.58)   | (146.36, 194.18) | (-2.73, -2.49) | <0.001 | (5.26, 5.91)   | (1.73, 2.08)   | (-3.88, -3.45)    | <0.001 |
| High-income North America    | 40.19           | 36.36          |                      |        | 727.63             | 823.11            |                    |        | 363.41             | 281.37           | -0.88          |        | 4.95           | 3.13           | -1.60             |        |
|                              | (27.79, 54.72)  | (24.32, 50.42) | -0.35 (-0.38, -0.32) | <0.001 | (612.64, 861.85)   | (695.54, 972.81)  | 0.67 (-0.22, 1.56) | 0.141  | (327.63, 403.54)   | (242.81, 321.28) | (-1.28, -0.47) | <0.001 | (4.69, 5.18)   | (2.90, 3.44)   | (-1.99, -1.22)    | <0.001 |
| Central Asia                 | 77.32           | 60.15          |                      |        | 878.01             | 780.15            | -0.39              |        | 769.51             | 608.24           | -0.88          |        | 11.68          | 8.88           | -1.03             |        |
|                              | (63.11, 96.73)  | (46.79, 77.18) | -0.85 (-0.90, -0.80) | <0.001 | (762.32, 990.68)   | (665.11, 911.85)  | (-0.46, -0.32)     | <0.001 | (696.08, 841.53)   | (514.07, 719.80) | (-1.15, -0.60) | <0.001 | (10.72, 12.58) | (7.33, 10.75)  | (-1.34, -0.71)    | <0.001 |
| Eastern Europe               | 70.57           | 65.21          |                      |        | 887.04             | 931.21            | 0.21 (0.06, 0.35)  |        | 505.97             | 581.98           | 0.72           |        | 6.59           | 7.88           | 0.94 (0.11, 1.77) | 0.026  |
|                              | (52.28, 77.32)  | (48.63, 60.15) | -0.27 (-0.31, -0.24) | <0.001 | (746.21, 878.01)   | (791.91, 878.01)  |                    | 0.005  | (434.50, 769.51)   | (471.04, 608.24) | (0.07, -0.88)  | 0.030  | (5.72, 11.68)  | (6.16, 8.88)   |                   |        |

|                     |          |          |               |        |           |           |              |        |          |          |         |        |         |         |             |        |
|---------------------|----------|----------|---------------|--------|-----------|-----------|--------------|--------|----------|----------|---------|--------|---------|---------|-------------|--------|
|                     | 93.65)   | 84.61)   |               |        | 1056.76)  | 1109.18)  |              |        | 570.77)  | 720.29)  | 1.37)   |        | 7.16)   | 10.32)  |             |        |
| Southern            | 61.54    | 40.26    |               |        | 968.70    | 799.02    | -0.66        |        | 936.28   | 390.83   | -2.85   |        | 15.58   | 5.49    | -3.39       |        |
| Sub-Saharan Africa  | (46.08,  | (29.77,  | -1.47 (-1.56, | <0.001 | (817.23,  | (672.28,  | (-0.70,      | <0.001 | (769.46, | (285.34, | (-4.08, | <0.001 | (12.33, | (3.64,  | (-4.99,     | <0.001 |
|                     | 81.11)   | 54.01)   | -1.38)        |        | 1136.73)  | 941.69)   | -0.62)       |        | 1098.52) | 512.26)  | -1.59)  |        | 18.51)  | 7.76)   | -1.76)      |        |
| High-income Asia    | 52.60    | 47.48    |               |        | 634.24    | 616.69    | -0.09        |        | 482.44   | 217.88   | -2.69   |        | 7.28    | 2.20    | -4.07       |        |
| Pacific             | (38.82,  | (32.50,  | -0.35 (-0.46, | <0.001 | (543.07,  | (516.96,  | (-0.21,      | 0.162  | (431.66, | (181.99, | (-3.02, | <0.001 | (6.60,  | (1.94,  | (-4.58,     | <0.001 |
|                     | 72.02)   | 65.41)   | -0.25)        |        | 734.07)   | 723.68)   | 0.04)        |        | 526.74)  | 255.24)  | -2.36)  |        | 7.90)   | 2.49)   | -3.56)      |        |
| Central Europe      | 70.56    | 48.13    |               |        | 901.05    | 811.01    | -0.32        |        | 716.60   | 352.97   | -2.45   |        | 10.62   | 3.89    | -3.50       |        |
|                     | (54.93,  | (34.40,  | -1.30 (-1.39, | <0.001 | (786.00,  | (698.43,  | (-0.56,      | 0.007  | (653.18, | (289.63, | (-2.72, | <0.001 | (10.08, | (3.20,  | (-3.90,     | <0.001 |
|                     | 89.09)   | 64.84)   | -1.21)        |        | 1034.44)  | 945.03)   | -0.09)       |        | 780.66)  | 417.07)  | -2.19)  |        | 11.18)  | 4.64)   | -3.09)      |        |
| Andean Latin        | 82.16    | 55.36    |               |        | 996.80    | 807.18    | -0.69        |        | 896.75   | 401.55   | -2.70   |        | 15.60   | 6.31    | -3.04       |        |
| America             | (67.12,  | (41.22,  | -1.35 (-1.38, | <0.001 | (870.49,  | (698.06,  | (-0.83,      | <0.001 | (745.63, | (304.36, | (-3.65, | <0.001 | (12.78, | (4.47,  | (-4.17,     | <0.001 |
|                     | 100.75)  | 73.21)   | -1.33)        |        | 1145.60)  | 932.80)   | -0.56)       |        | 1068.72) | 528.00)  | -1.73)  |        | 18.84)  | 8.79)   | -1.90)      |        |
| Caribbean           | 98.26    | 96.23    |               |        | 1005.57   | 984.94    | -0.06        |        | 1042.48  | 909.11   | -0.44   |        | 18.38   | 15.84   | -0.49       |        |
|                     | (79.39,  | (77.89,  | -0.07 (-0.14, | 0.065  | (883.78,  | (860.55,  | (-0.16,      | 0.206  | (847.52, | (636.35, | (-0.78, | 0.009  | (14.71, | (10.58, | (-0.86,     | 0.012  |
|                     | 121.15)  | 119.29)  | 0.00)         |        | 1144.18)  | 1124.73)  | 0.04)        |        | 1280.41) | 1279.05) | -0.11)  |        | 22.93)  | 22.92)  | -0.10)      |        |
| Southern Latin      | 65.28    | 45.17    |               |        | 704.92    | 581.54    | -0.64        |        | 881.84   | 363.94   | -2.98   |        | 15.07   | 5.33    | -3.49       |        |
| America             | (51.71,  | (32.91,  | -1.26 (-1.30, | <0.001 | (598.12,  | (485.60,  | (-0.80,      | <0.001 | (789.42, | (301.64, | (-3.25, | <0.001 | (13.34, | (4.34,  | (-3.82,     | <0.001 |
|                     | 82.36)   | 60.97)   | -1.22)        |        | 823.01)   | 685.83)   | -0.48)       |        | 972.58)  | 427.04)  | -2.71)  |        | 16.81)  | 6.38)   | -3.16)      |        |
| Oceania             | 135.51   | 141.82   |               |        | 1296.54   | 1308.61   |              |        | 1311.82  | 1386.19  | 0.20    |        | 20.43   | 21.82   |             |        |
|                     | (114.64, | (121.16, | 0.16 (0.12,   | <0.001 | (1142.34, | (1143.56, | 0.04 (-0.01, | 0.106  | (961.72, | (982.02, | (0.08,  | 0.001  | (14.11, | (13.94, | 0.23 (0.09, | 0.001  |
|                     | 160.19)  | 165.96)  | 0.19)         |        | 1452.55)  | 1491.18)  | 0.08)        |        | 1778.70) | 1964.28) | 0.31)   |        | 29.54)  | 33.14)  | 0.36)       |        |
| Australasia         | 35.85    | 31.00    |               |        | 560.74    | 539.30    | -0.10        |        | 280.75   | 174.28   | -1.67   |        | 3.77    | 1.77    | -2.59       |        |
|                     | (24.29,  | (20.72,  | -0.47 (-0.56, | <0.001 | (444.79,  | (421.22,  | (-0.26,      | 0.184  | (241.16, | (135.69, | (-1.93, | <0.001 | (3.28,  | (1.33,  | (-2.92,     | <0.001 |
|                     | 49.50)   | 44.61)   | -0.38)        |        | 678.37)   | 660.81)   | 0.05)        |        | 321.01)  | 216.79)  | -1.40)  |        | 4.26)   | 2.28)   | -2.26)      |        |
| <b>Men</b>          |          |          |               |        |           |           |              |        |          |          |         |        |         |         |             |        |
| Global              | 62.28    | 57.01    |               |        | 616.55    | 606.85    |              |        | 932.67   | 723.75   | -0.84   |        | 16.32   | 12.33   | -0.93       |        |
|                     | (48.33,  | (44.13,  | -0.31 (-0.36, | <0.001 | (532.57,  | (524.03,  | 0.00 (-0.26, | 0.978  | (857.80, | (657.06, | (-1.17, | <0.001 | (14.88, | (11.14, | (-1.26,     | <0.001 |
|                     | 79.08)   | 72.71)   | -0.26)        |        | 709.34)   | 699.37)   | 0.26)        |        | 1018.23) | 799.00)  | -0.51)  |        | 17.95)  | 13.70)  | -0.60)      |        |
| <b>SDI category</b> |          |          |               |        |           |           |              |        |          |          |         |        |         |         |             |        |
| High                | 41.66    | 38.72    |               |        | 495.00    | 531.89    |              |        | 495.84   | 321.21   | -1.48   |        | 8.27    | 4.78    | -1.88       |        |
|                     | (32.31,  | (29.13,  | -0.26 (-0.32, | <0.001 | (422.67,  | (457.01,  | 0.39 (-0.24, | 0.229  | (466.61, | (283.01, | (-1.67, | <0.001 | (7.84,  | (4.27,  | (-2.04,     | <0.001 |
|                     | 53.40)   | 51.21)   | -0.19)        |        | 574.93)   | 622.19)   | 1.03)        |        | 526.32)  | 365.94)  | -1.28)  |        | 8.71)   | 5.51)   | -1.71)      |        |

|                              | 2019                 | 2020            | 2021                 | 2022   | 2019              | 2020              | 2021               | 2022   | 2019               | 2020               | 2021           | 2022   | 2019           | 2020           | 2021           | 2022   |
|------------------------------|----------------------|-----------------|----------------------|--------|-------------------|-------------------|--------------------|--------|--------------------|--------------------|----------------|--------|----------------|----------------|----------------|--------|
| High-middle                  | 67.95                | 53.70           | -0.81 (-0.87, -0.75) | <0.001 | 626.54            | 557.52            | -0.36              | <0.001 | 994.17             | 717.89             | -1.05          | <0.001 | 17.35          | 12.19          | -1.13          | <0.001 |
|                              | (52.58, 86.31)       | (40.92, 70.04)  |                      |        | (532.84, 735.02)  | (475.09, 654.66)  | (-0.46, -0.26)     |        | (889.14, 1118.42)  | (633.37, 809.50)   | (-1.43, -0.66) |        | (15.44, 19.69) | (10.58, 13.86) | (-1.57, -0.68) |        |
|                              | 68.92                | 63.72           | -0.28 (-0.32, -0.24) | <0.001 | 666.32            | 655.87            | -0.05              | 0.287  | 1096.17            | 824.55             | -0.93          | <0.001 | 19.25          | 14.07          | -1.03          | <0.001 |
| Middle                       | (52.98, 89.19)       | (49.51, 80.89)  |                      |        | (570.71, 769.57)  | (564.32, 760.07)  | (-0.14, 0.04)      |        | (979.52, 1248.90)  | (723.62, 925.79)   | (-1.21, -0.65) |        | (17.02, 22.30) | (12.25, 15.90) | (-1.36, -0.71) | <0.001 |
|                              | 60.59                | 60.18           | -0.04 (-0.09, 0.02)  | 0.222  | 616.37            | 618.33            | 0.06 (-0.16, 0.28) | 0.584  | 1005.85            | 838.34             | -0.56          | <0.001 | 17.89          | 14.64          | -0.62          | <0.001 |
| Low-middle                   | (47.82, 75.77)       | (47.16, 75.90)  |                      |        | (536.52, 703.31)  | (533.96, 709.13)  |                    |        | (885.25, 1134.26)  | (733.48, 962.23)   | (-0.87, -0.26) |        | (15.51, 20.37) | (12.67, 17.01) | (-0.95, -0.29) | <0.001 |
|                              | 67.45                | 59.94           | -0.42 (-0.45, -0.39) | <0.001 | 654.99            | 625.97            | -0.12              | 0.196  | 874.93             | 712.53             | -0.69          | <0.001 | 15.38          | 12.29          | -0.77          | <0.001 |
| Low                          | (53.88, 83.83)       | (47.27, 74.97)  |                      |        | (572.33, 742.68)  | (546.93, 705.77)  | (-0.30, 0.06)      |        | (744.84, 1013.86)  | (596.00, 856.49)   | (-0.88, -0.51) |        | (13.01, 18.04) | (10.00, 15.03) | (-1.06, -0.48) | <0.001 |
|                              | <b>21 GBD region</b> |                 |                      |        |                   |                   |                    |        |                    |                    |                |        |                |                |                |        |
| South Asia                   | 49.27                | 52.72           | 0.22 (0.15, 0.29)    | <0.001 | 544.63            | 553.23            | 0.11 (-0.15, 0.38) | 0.407  | 757.92             | 684.34             | -0.24          | 0.424  | 13.30          | 11.83          | -0.30          | 0.421  |
|                              | (37.12, 63.74)       | (39.95, 68.23)  |                      |        | (466.93, 632.01)  | (471.26, 647.29)  |                    |        | (632.21, 888.13)   | (582.50, 801.04)   | (-0.82, 0.35)  |        | (10.90, 15.72) | (9.89, 14.03)  | (-1.04, 0.44)  |        |
|                              | 58.49                | 55.26           | -0.22 (-0.28, -0.15) | <0.001 | 576.95            | 543.42            | -0.20              | 0.002  | 1205.13            | 971.38             | -0.61          | 0.035  | 21.35          | 16.91          | -0.67          | 0.008  |
| East Asia                    | (42.98, 80.31)       | (41.36, 73.23)  |                      |        | (481.22, 679.70)  | (451.45, 650.07)  | (-0.32, -0.07)     |        | (1002.24, 1438.72) | (756.33, 1152.16)  | (-1.17, -0.04) |        | (17.44, 26.10) | (12.82, 20.39) | (-1.16, -0.17) |        |
|                              | 67.93                | 61.56           | -0.34 (-0.37, -0.31) | <0.001 | 741.48            | 731.25            | 0.01 (-0.10, 0.12) | 0.843  | 871.11             | 577.07             | -1.39          | <0.001 | 14.99          | 9.30           | -1.61          | <0.001 |
| North Africa and Middle East | (55.42, 83.98)       | (48.72, 78.79)  |                      |        | (655.03, 840.60)  | (645.08, 823.85)  |                    |        | (730.34, 1093.96)  | (473.93, 726.56)   | (-1.54, -1.25) |        | (12.37, 19.43) | (7.37, 11.98)  | (-1.73, -1.50) | <0.001 |
|                              | 60.66                | 57.99           | -0.15 (-0.18, -0.12) | <0.001 | 695.79            | 690.95            | 0.00 (-0.12, 0.12) | 0.994  | 747.50             | 641.28             | -0.53          | <0.001 | 12.86          | 10.81          | -0.60          | <0.001 |
| Western Sub-Saharan Africa   | (47.62, 76.99)       | (45.84, 73.54)  |                      |        | (609.22, 791.88)  | (602.84, 790.24)  |                    |        | (594.61, 944.79)   | (507.38, 802.95)   | (-0.63, -0.43) |        | (10.03, 16.74) | (8.27, 13.91)  | (-0.71, -0.49) | <0.001 |
|                              | 110.53               | 99.78           | -0.36 (-0.37, -0.34) | <0.001 | 924.58            | 881.35            | -0.12              | 0.205  | 1462.47            | 1255.37            | -0.48          | <0.001 | 25.25          | 21.36          | -0.52          | <0.001 |
| Southeast Asia               | (89.11, 138.81)      | (79.56, 125.16) |                      |        | (799.58, 1059.34) | (760.91, 1017.95) | (-0.31, 0.07)      |        | (1257.30, 1681.20) | (1035.31, 1474.04) | (-0.66, -0.31) |        | (21.27, 29.37) | (17.32, 25.61) | (-0.75, -0.30) | <0.001 |
|                              | 77.80                | 56.90           | -1.07 (-1.12, -1.03) | <0.001 | 732.01            | 663.12            | -0.31              | <0.001 | 1069.59            | 726.70             | -1.33          | <0.001 | 19.03          | 12.54          | -1.43          | <0.001 |
| Eastern Sub-Saharan Africa   | (62.37, 96.65)       | (44.42, 71.74)  |                      |        | (636.86, 832.41)  | (576.05, 753.54)  | (-0.47, -0.15)     |        | (870.10, 1285.21)  | (566.94, 914.40)   | (-1.43, -1.23) |        | (15.28, 23.17) | (9.47, 16.28)  | (-1.52, -1.35) | <0.001 |
|                              | 49.47                | 39.17           | -0.81 (-0.92, -0.70) | <0.001 | 608.17            | 564.46            | -0.21              | 0.030  | 517.31             | 366.05             | -1.11          | <0.001 | 9.07           | 6.20           | -1.22          | <0.001 |
| Central Latin America        | (38.48, 76.99)       | (29.08, 74.97)  |                      |        | (527.98, 742.68)  | (485.10, 705.77)  | (-0.40, 0.06)      |        | (480.63, 1013.86)  | (304.01, 856.49)   | (-1.44, -0.51) |        | (8.46, 18.04)  | (5.05, 15.03)  | (-1.56, -0.48) | <0.001 |
| 188                          |                      |                 |                      |        |                   |                   |                    |        |                    |                    |                |        |                |                |                |        |



|                                   |                  |                  |                      |        |                   |                   |                      |        |                     |                     |                      |                   |                   |                      |        |
|-----------------------------------|------------------|------------------|----------------------|--------|-------------------|-------------------|----------------------|--------|---------------------|---------------------|----------------------|-------------------|-------------------|----------------------|--------|
|                                   | 95.28)           | 86.64)           |                      |        | 819.14)           | 786.51)           | 0.01)                |        | 970.80)             | 924.49)             | -0.34)               | 17.75)            | 16.78)            | -0.36)               |        |
| Southern Latin America            | 55.82            | 35.52            | -1.55 (-1.62, -1.48) | <0.001 | 510.11            | 402.28            | -0.82                |        | 956.01              | 403.13              | -2.90                | 17.22             | 6.72              | -3.16                |        |
|                                   | (45.51, 68.86)   | (26.43, 46.38)   |                      |        | (419.69, 611.16)  | (320.68, 490.80)  | (-0.86, -0.77)       | <0.001 | (840.56, 1084.09)   | (322.59, 491.87)    | (-3.40, -2.41)       | (14.98, 19.58)    | (5.18, 8.39)      | (-3.72, -2.60)       | <0.001 |
| Oceania                           | 156.89           | 153.99           | -0.06 (-0.08, -0.05) | <0.001 | 1119.74           | 1102.48           | -0.04                |        | 2210.64             | 2134.10             | -0.15                | 39.13             | 37.72             | -0.16                |        |
|                                   | (133.41, 185.09) | (129.59, 182.46) |                      |        | (979.98, 1266.39) | (960.06, 1271.19) | (-0.09, 0.00)        | 0.054  | (1456.75, 3144.97)  | (1402.55, 3072.78)  | (-0.22, -0.08)       | (24.68, 57.27)    | (23.80, 56.13)    | (-0.23, -0.09)       | <0.001 |
| Australasia                       | 29.51            | 22.77            | -0.89 (-0.93, -0.85) | <0.001 | 370.56            | 307.31            | -0.65                |        | 249.35              | 138.73              | -2.05                | 3.87              | 1.82              | -2.62                |        |
|                                   | (20.90, 40.99)   | (15.04, 33.46)   |                      |        | (284.81, 460.72)  | (226.33, 399.83)  | (-0.88, -0.42)       | <0.001 | (211.87, 288.83)    | (104.92, 182.63)    | (-2.52, -1.57)       | (3.26, 4.54)      | (1.26, 2.51)      | (-3.27, -1.97)       | <0.001 |
| <b>Hypertensive heart disease</b> |                  |                  |                      |        |                   |                   |                      |        |                     |                     |                      |                   |                   |                      |        |
| <b>15-19 years</b>                |                  |                  |                      |        |                   |                   |                      |        |                     |                     |                      |                   |                   |                      |        |
| <b>Women</b>                      |                  |                  |                      |        |                   |                   |                      |        |                     |                     |                      |                   |                   |                      |        |
| Global                            | —                | —                | —                    | —      | 0.18 (0.07, 0.33) | 0.19 (0.07, 0.37) | 0.28 (0.24, 0.32)    | <0.001 | 12.78 (7.29, 18.21) | 9.22 (6.09, 11.96)  | -1.12 (-1.28, -0.96) | 0.18 (0.10, 0.25) | 0.13 (0.09, 0.17) | -1.12 (-1.28, -0.96) | <0.001 |
| <b>SDI category</b>               |                  |                  |                      |        |                   |                   |                      |        |                     |                     |                      |                   |                   |                      |        |
| High                              | —                | —                | —                    | —      | 0.30 (0.13, 0.55) | 0.29 (0.13, 0.55) | -0.01 (-0.07, 0.05)  | 0.789  | 3.85 (2.02, 4.90)   | 1.62 (1.16, 1.90)   | -2.89 (-3.23, -2.56) | 0.05 (0.03, 0.07) | 0.02 (0.02, 0.03) | -2.92 (-3.25, -2.59) | <0.001 |
| High-middle                       | —                | —                | —                    | —      | 0.15 (0.06, 0.29) | 0.15 (0.06, 0.28) | -0.06 (-0.12, -0.01) | 0.019  | 6.07 (4.62, 7.62)   | 2.77 (2.31, 3.25)   | -2.66 (-2.91, -2.41) | 0.08 (0.06, 0.11) | 0.04 (0.03, 0.05) | -2.66 (-2.91, -2.42) | <0.001 |
| Middle                            | —                | —                | —                    | —      | 0.17 (0.07, 0.33) | 0.17 (0.07, 0.34) | 0.11 (0.07, 0.15)    | <0.001 | 15.00 (9.62, 19.80) | 7.53 (5.67, 9.36)   | -2.36 (-2.51, -2.21) | 0.21 (0.13, 0.28) | 0.11 (0.08, 0.13) | -2.36 (-2.51, -2.21) | <0.001 |
| Low-middle                        | —                | —                | —                    | —      | 0.11 (0.04, 0.22) | 0.14 (0.05, 0.28) | 0.69 (0.66, 0.71)    | <0.001 | 14.62 (5.93, 24.06) | 9.58 (5.81, 13.01)  | -1.49 (-1.75, -1.23) | 0.20 (0.08, 0.34) | 0.13 (0.08, 0.18) | -1.49 (-1.75, -1.24) | <0.001 |
| Low                               | —                | —                | —                    | —      | 0.25 (0.09, 0.52) | 0.27 (0.09, 0.55) | 0.23 (0.21, 0.26)    | <0.001 | 23.91 (8.62, 41.73) | 18.77 (9.05, 27.29) | -0.82 (-0.97, -0.67) | 0.33 (0.12, 0.58) | 0.26 (0.13, 0.38) | -0.82 (-0.98, -0.67) | <0.001 |

| 21 GBD region                |    |    |    |    |                   |                   |                      |        |                      |                      |                      |        |                   |                   |                      |        |
|------------------------------|----|----|----|----|-------------------|-------------------|----------------------|--------|----------------------|----------------------|----------------------|--------|-------------------|-------------------|----------------------|--------|
| Region                       | Y1 | Y2 | Y3 | Y4 | Y1                | Y2                | Y3                   | Y4     | Y1                   | Y2                   | Y3                   | Y4     | Y1                | Y2                | Y3                   | Y4     |
| South Asia                   | —  | —  | —  | —  | 0.06 (0.02, 0.12) | 0.06 (0.02, 0.13) | 0.12 (0.08, 0.15)    | <0.001 | 10.17 (1.94, 19.82)  | 5.34 (2.37, 8.23)    | -2.32 (-3.01, -1.62) | <0.001 | 0.14 (0.03, 0.28) | 0.07 (0.03, 0.12) | -2.32 (-3.01, -1.62) | <0.001 |
| East Asia                    | —  | —  | —  | —  | 0.21 (0.09, 0.40) | 0.23 (0.10, 0.45) | 0.38 (0.36, 0.40)    | <0.001 | 13.87 (9.03, 17.71)  | 3.91 (2.63, 5.18)    | -4.32 (-4.61, -4.03) | <0.001 | 0.19 (0.13, 0.25) | 0.05 (0.04, 0.07) | -4.33 (-4.62, -4.04) | <0.001 |
| North Africa and Middle East | —  | —  | —  | —  | 0.12 (0.05, 0.24) | 0.13 (0.05, 0.25) | 0.15 (0.09, 0.21)    | <0.001 | 31.11 (14.34, 48.53) | 18.29 (11.82, 26.71) | -1.74 (-2.10, -1.36) | <0.001 | 0.43 (0.20, 0.68) | 0.26 (0.17, 0.37) | -1.73 (-2.10, -1.36) | <0.001 |
| Western Sub-Saharan Africa   | —  | —  | —  | —  | 0.50 (0.18, 1.03) | 0.51 (0.18, 1.04) | 0.04 (-0.04, 0.11)   | 0.337  | 33.94 (15.87, 50.07) | 31.99 (15.02, 47.31) | -0.20 (-0.32, -0.07) | 0.002  | 0.47 (0.22, 0.70) | 0.45 (0.21, 0.66) | -0.20 (-0.32, -0.07) | 0.002  |
| Southeast Asia               | —  | —  | —  | —  | 0.11 (0.04, 0.21) | 0.11 (0.05, 0.22) | 0.25 (0.21, 0.28)    | <0.001 | 9.09 (4.21, 14.42)   | 6.40 (4.05, 8.19)    | -1.19 (-1.37, -1.01) | <0.001 | 0.13 (0.06, 0.20) | 0.09 (0.06, 0.11) | -1.17 (-1.35, -0.99) | <0.001 |
| Eastern Sub-Saharan Africa   | —  | —  | —  | —  | 0.43 (0.16, 0.88) | 0.43 (0.15, 0.91) | 0.06 (0.03, 0.10)    | 0.001  | 27.81 (10.37, 53.23) | 15.20 (7.60, 23.78)  | -2.05 (-2.18, -1.92) | <0.001 | 0.39 (0.14, 0.74) | 0.21 (0.11, 0.33) | -2.05 (-2.19, -1.92) | <0.001 |
| Central Latin America        | —  | —  | —  | —  | 0.11 (0.04, 0.22) | 0.10 (0.04, 0.21) | -0.13 (-0.16, -0.10) | <0.001 | 7.15 (4.44, 8.35)    | 4.44 (3.40, 5.79)    | -1.57 (-2.00, -1.14) | <0.001 | 0.10 (0.06, 0.12) | 0.06 (0.05, 0.08) | -1.57 (-2.00, -1.14) | <0.001 |
| Tropical Latin America       | —  | —  | —  | —  | 0.11 (0.04, 0.23) | 0.11 (0.04, 0.22) | -0.14 (-0.16, -0.11) | <0.001 | 7.39 (5.15, 8.62)    | 4.34 (3.58, 6.69)    | -1.82 (-2.43, -1.21) | <0.001 | 0.10 (0.07, 0.12) | 0.06 (0.05, 0.09) | -1.82 (-2.43, -1.21) | <0.001 |
| Central Sub-Saharan Africa   | —  | —  | —  | —  | 0.19 (0.06, 0.41) | 0.18 (0.06, 0.41) | 0.01 (-0.08, 0.10)   | 0.843  | 22.45 (6.68, 42.54)  | 16.29 (7.59, 27.79)  | -1.11 (-1.23, -1.00) | <0.001 | 0.31 (0.09, 0.60) | 0.23 (0.11, 0.39) | -1.12 (-1.23, -1.00) | <0.001 |
| Western Europe               | —  | —  | —  | —  | 0.18 (0.08, 0.35) | 0.15 (0.07, 0.28) | -0.71 (-0.83, -0.59) | <0.001 | 1.33 (1.05, 1.60)    | 1.05 (0.82, 1.28)    | -0.81 (-1.04, -0.58) | <0.001 | 0.02 (0.01, 0.02) | 0.01 (0.01, 0.02) | -0.81 (-1.04, -0.58) | <0.001 |
| High-income North America    | —  | —  | —  | —  | 0.47 (0.21, 0.85) | 0.45 (0.20, 0.84) | -0.10 (-0.16, -0.04) | 0.005  | 1.38 (1.17, 1.69)    | 1.55 (0.94, 1.81)    | 0.50 (-0.29, 0.29)   | 0.218  | 0.02 (0.02, 0.02) | 0.02 (0.01, 0.01) | 0.52 (-0.27, 1.31)   | 0.197  |





|                              |   |   |   |   | 0.38)       | 0.43)       | 0.48)        |        | 14.81)        | 8.17)         | (-2.17, | (0.09, | (0.06, | (-2.18,     |         |        |
|------------------------------|---|---|---|---|-------------|-------------|--------------|--------|---------------|---------------|---------|--------|--------|-------------|---------|--------|
|                              |   |   |   |   |             |             |              |        |               |               | -1.87)  | 0.21)  | 0.11)  | -1.87)      |         |        |
| <b>SDI category</b>          |   |   |   |   |             |             |              |        |               |               |         |        |        |             |         |        |
| High                         | — | — | — | — | 0.31 (0.14, | 0.33 (0.15, | 0.18 (0.13,  | <0.001 | 7.46 (2.36,   | 2.50 (1.60,   | -3.65   | 0.10   | 0.03   | -3.56       |         |        |
|                              |   |   |   |   | 0.58)       | 0.61)       | 0.23)        |        | 9.96)         | 2.97)         | (-4.12, | <0.001 | (0.03, | (0.02,      | (-4.02, | <0.001 |
|                              |   |   |   |   |             |             |              |        |               |               | -3.18)  |        | 0.14)  | 0.04)       | -3.09)  |        |
| High-middle                  | — | — | — | — | 0.16 (0.07, | 0.16 (0.07, | -0.05        | 0.006  | 9.17 (6.69,   | 3.67 (2.98,   | -3.18   | 0.13   | 0.05   | -3.18       |         |        |
|                              |   |   |   |   | 0.31)       | 0.31)       | (-0.08,      |        | 11.95)        | 4.52)         | (-3.38, | <0.001 | (0.09, | (0.04,      | (-3.38, | <0.001 |
|                              |   |   |   |   |             |             | -0.01)       |        |               |               | -2.98)  |        | 0.17)  | 0.06)       | -2.98)  |        |
| Middle                       | — | — | — | — | 0.19 (0.08, | 0.20 (0.08, | 0.13 (0.08,  | <0.001 | 16.71 (8.98,  | 9.35 (6.19,   | -1.99   | 0.23   | 0.13   | -1.99       |         |        |
|                              |   |   |   |   | 0.38)       | 0.39)       | 0.17)        |        | 23.02)        | 13.42)        | (-2.17, | <0.001 | (0.13, | (0.09,      | (-2.17, | <0.001 |
|                              |   |   |   |   |             |             |              |        |               |               | -1.81)  |        | 0.32)  | 0.19)       | -1.81)  |        |
| Low-middle                   | — | — | — | — | 0.13 (0.05, | 0.17 (0.07, | 0.83 (0.80,  | <0.001 | 8.00 (4.86,   | 5.35 (3.89,   | -1.36   | 0.11   | 0.07   | -1.36       |         |        |
|                              |   |   |   |   | 0.26)       | 0.33)       | 0.86)        |        | 10.82)        | 6.98)         | (-1.78, | <0.001 | (0.07, | (0.05,      | (-1.79, | <0.001 |
|                              |   |   |   |   |             |             |              |        |               |               | -0.93)  |        | 0.15)  | 0.10)       | -0.93)  |        |
| Low                          | — | — | — | — | 0.30 (0.11, | 0.33 (0.12, | 0.36 (0.31,  | <0.001 | 8.24 (3.99,   | 6.62 (4.03,   | -0.77   | 0.11   | 0.09   | -0.77       |         |        |
|                              |   |   |   |   | 0.60)       | 0.67)       | 0.40)        |        | 12.78)        | 9.26)         | (-0.94, | <0.001 | (0.05, | (0.06,      | (-0.94, | <0.001 |
|                              |   |   |   |   |             |             |              |        |               |               | -0.59)  |        | 0.18)  | 0.13)       | -0.59)  |        |
| <b>21 GBD region</b>         |   |   |   |   |             |             |              |        |               |               |         |        |        |             |         |        |
| South Asia                   | — | — | — | — | 0.06 (0.02, | 0.06 (0.02, | 0.12 (0.10,  | <0.001 | 2.83 (1.57,   | 2.44 (1.75,   | -0.70   | 0.04   | 0.03   | -0.70       |         |        |
|                              |   |   |   |   | 0.11)       | 0.12)       | 0.15)        |        | 4.30)         | 3.46)         | (-2.23, | 0.377  | (0.02, | (0.02,      | (-2.23, | 0.378  |
|                              |   |   |   |   |             |             |              |        |               |               | 0.86)   |        | 0.06)  | 0.05)       | 0.86)   |        |
| East Asia                    | — | — | — | — | 0.23 (0.09, | 0.25 (0.10, | 0.25 (0.19,  | <0.001 | 22.53 (10.32, | 7.46 (4.70,   | -3.75   | 0.31   | 0.10   | -3.75       |         |        |
|                              |   |   |   |   | 0.45)       | 0.48)       | 0.30)        |        | 29.91)        | 9.80)         | (-4.03, | <0.001 | (0.14, | (0.07,      | (-4.03, | <0.001 |
|                              |   |   |   |   |             |             |              |        |               |               | -3.48)  |        | 0.42)  | 0.14)       | -3.47)  |        |
| North Africa and Middle East | — | — | — | — | 0.18 (0.08, | 0.18 (0.08, | 0.12 (0.09,  | <0.001 | 25.04 (13.29, | 20.94 (10.50, | -0.57   | 0.35   | 0.29   | -0.57       |         |        |
|                              |   |   |   |   | 0.34)       | 0.35)       | 0.16)        |        | 46.59)        | 38.18)        | (-0.76, | <0.001 | (0.19, | (0.15,      | (-0.75, | <0.001 |
|                              |   |   |   |   |             |             |              |        |               |               | -0.39)  |        | 0.65)  | 0.53)       | -0.39)  |        |
| Western Sub-Saharan Africa   | — | — | — | — | 0.64 (0.24, | 0.64 (0.24, | 0.04 (-0.01, | 0.141  | 3.10 (1.54,   | 3.75 (1.91,   | 0.66    | 0.04   | 0.05   | 0.68 (0.48, |         |        |
|                              |   |   |   |   | 1.30)       | 1.30)       | 0.08)        |        | 4.93)         | 6.35)         | (0.47,  | <0.001 | (0.02, | (0.03,      | 0.88)   | <0.001 |
|                              |   |   |   |   |             |             |              |        |               |               | 0.86)   |        | 0.07)  | 0.09)       |         |        |
| Southeast Asia               | — | — | — | — | 0.13 (0.05, | 0.13 (0.05, | 0.21 (0.20,  | <0.001 | 6.68 (3.42,   | 7.09 (5.23,   | 0.24    | 0.09   | 0.10   | 0.24 (0.07, |         |        |
|                              |   |   |   |   | 0.25)       | 0.26)       | 0.23)        |        | 10.27)        | 9.25)         | (0.07,  | 0.006  | (0.05, | (0.07,      | 0.41)   | 0.005  |

|                             |   |   |   |   |                   |                   |                      |        |                     |                    |                      |        |                   |                   |                      |        |  |
|-----------------------------|---|---|---|---|-------------------|-------------------|----------------------|--------|---------------------|--------------------|----------------------|--------|-------------------|-------------------|----------------------|--------|--|
|                             |   |   |   |   |                   |                   |                      |        |                     |                    |                      |        | 0.41)             | 0.14)             | 0.13)                |        |  |
| Eastern Sub-Saharan Africa  | — | — | — | — | 0.60 (0.22, 1.19) | 0.62 (0.23, 1.26) | 0.15 (0.11, 0.18)    | <0.001 | 14.47 (7.05, 22.96) | 9.91 (5.98, 16.39) | -1.29 (-1.36, -1.21) | <0.001 | 0.20 (0.10, 0.32) | 0.14 (0.08, 0.23) | -1.29 (-1.37, -1.22) | <0.001 |  |
| Central Latin America       | — | — | — | — | 0.10 (0.04, 0.20) | 0.10 (0.04, 0.20) | 0.08 (0.04, 0.12)    | <0.001 | 5.82 (3.86, 6.88)   | 3.73 (2.78, 4.87)  | -1.45 (-1.75, -1.14) | <0.001 | 0.08 (0.05, 0.10) | 0.05 (0.04, 0.07) | -1.45 (-1.75, -1.14) | <0.001 |  |
| Tropical Latin America      | — | — | — | — | 0.11 (0.04, 0.21) | 0.11 (0.04, 0.22) | -0.01 (-0.05, 0.02)  | 0.415  | 6.69 (5.45, 8.04)   | 5.10 (4.28, 7.20)  | -0.97 (-1.34, -0.61) | <0.001 | 0.09 (0.08, 0.11) | 0.07 (0.06, 0.10) | -0.97 (-1.34, -0.61) | <0.001 |  |
| Central Sub-Saharan Africa  | — | — | — | — | 0.22 (0.07, 0.48) | 0.22 (0.07, 0.47) | 0.08 (-0.05, 0.22)   | 0.230  | 10.36 (3.93, 18.88) | 7.33 (3.70, 12.83) | -1.21 (-1.36, -1.06) | <0.001 | 0.14 (0.05, 0.26) | 0.10 (0.05, 0.18) | -1.21 (-1.36, -1.06) | <0.001 |  |
| Western Europe              | — | — | — | — | 0.17 (0.07, 0.31) | 0.14 (0.06, 0.27) | -0.70 (-0.75, -0.66) | <0.001 | 1.93 (1.24, 2.34)   | 1.15 (0.91, 1.40)  | -1.78 (-2.22, -1.35) | <0.001 | 0.03 (0.02, 0.03) | 0.02 (0.01, 0.02) | -1.79 (-2.23, -1.35) | <0.001 |  |
| High-income North America   | — | — | — | — | 0.53 (0.24, 0.97) | 0.55 (0.24, 1.03) | 0.17 (0.10, 0.25)    | <0.001 | 2.58 (2.19, 3.23)   | 3.71 (2.02, 4.41)  | 1.29 (0.50, 2.09)    | 0.001  | 0.04 (0.03, 0.04) | 0.05 (0.03, 0.06) | 1.32 (0.52, 2.12)    | 0.001  |  |
| Central Asia                | — | — | — | — | 0.10 (0.04, 0.19) | 0.11 (0.04, 0.21) | 0.23 (0.19, 0.27)    | <0.001 | 8.08 (6.46, 10.57)  | 9.89 (7.38, 12.96) | 0.84 (0.05, 1.64)    | 0.037  | 0.11 (0.09, 0.15) | 0.14 (0.10, 0.18) | 0.84 (0.05, 1.64)    | 0.036  |  |
| Eastern Europe              | — | — | — | — | 0.04 (0.02, 0.09) | 0.05 (0.02, 0.10) | 0.14 (0.12, 0.17)    | <0.001 | 1.30 (0.63, 1.50)   | 1.60 (0.81, 2.02)  | 0.77 (-0.26, 1.80)   | 0.145  | 0.02 (0.01, 0.02) | 0.02 (0.01, 0.03) | 0.77 (-0.26, 1.81)   | 0.141  |  |
| Southern Sub-Saharan Africa | — | — | — | — | 0.30 (0.11, 0.62) | 0.27 (0.10, 0.55) | -0.36 (-0.46, -0.26) | <0.001 | 7.59 (4.97, 11.11)  | 8.75 (5.34, 14.19) | 0.71 (0.30, 1.12)    | 0.001  | 0.11 (0.07, 0.16) | 0.12 (0.07, 0.20) | 0.71 (0.30, 1.12)    | 0.001  |  |
| High-income Asia Pacific    | — | — | — | — | 0.32 (0.15, 0.60) | 0.31 (0.14, 0.59) | -0.14 (-0.20, -0.08) | <0.001 | 22.40 (2.44, 32.33) | 1.42 (0.98, 2.21)  | -9.22 (-9.71, -8.73) | <0.001 | 0.31 (0.03, 0.45) | 0.02 (0.01, 0.03) | -9.28 (-9.77, -8.78) | <0.001 |  |
| Central Europe              | — | — | — | — | 0.07 (0.03, 0.13) | 0.06 (0.02, 0.11) | -0.61 (-0.65, -0.57) | <0.001 | 2.95 (2.15, 3.48)   | 2.75 (1.50, 3.66)  | -0.28 (-0.87, -0.31) | 0.358  | 0.04 (0.03, 0.04) | 0.04 (0.02, 0.04) | -0.28 (-0.87, -0.31) | 0.363  |  |





|                             |   |   |   |   |                    |                    |                      |        |                      |                      |                      |        |                   |                   |                      |        |
|-----------------------------|---|---|---|---|--------------------|--------------------|----------------------|--------|----------------------|----------------------|----------------------|--------|-------------------|-------------------|----------------------|--------|
|                             |   |   |   |   | 1.24)              | 1.04)              | (-0.81,              |        | 2.27)                | 1.56)                | (-1.66,              | (0.02, | (0.01,            | (-1.70,           |                      |        |
|                             |   |   |   |   |                    |                    | -0.64)               |        |                      |                      | -0.84)               | 0.03)  | 0.02)             | -0.85)            |                      |        |
| High-income North America   | — | — | — | — | 7.52 (4.24, 12.45) | 7.87 (4.40, 12.88) | 0.20 (0.06, 0.35)    | 0.007  | 4.20 (3.59, 5.64)    | 5.65 (3.32, 6.57)    | 0.96 (0.56, 1.36)    | <0.001 | (0.05, 0.07)      | (0.04, 0.09)      | 1.09 (0.64, 1.54)    | <0.001 |
| Central Asia                | — | — | — | — | 0.53 (0.21, 1.00)  | 0.55 (0.22, 1.08)  | 0.12 (0.07, 0.17)    | <0.001 | 9.44 (6.77, 11.66)   | 8.00 (5.63, 10.82)   | -0.61 (-0.92, -0.29) | <0.001 | 0.14 (0.10, 0.17) | 0.12 (0.08, 0.16) | -0.61 (-0.93, -0.29) | <0.001 |
| Eastern Europe              | — | — | — | — | 0.08 (0.04, 0.15)  | 0.08 (0.04, 0.16)  | 0.04 (-0.01, 0.09)   | 0.119  | 1.02 (0.70, 1.12)    | 1.69 (0.94, 2.19)    | 1.85 (0.76, 2.94)    | 0.001  | 0.02 (0.01, 0.02) | 0.03 (0.01, 0.03) | 1.86 (0.77, 2.96)    | 0.001  |
| Southern Sub-Saharan Africa | — | — | — | — | 0.71 (0.32, 1.32)  | 0.62 (0.27, 1.17)  | -0.47 (-0.56, -0.39) | <0.001 | 35.68 (26.55, 46.02) | 16.35 (10.16, 24.34) | -2.54 (-4.15, -0.90) | 0.003  | 0.54 (0.40, 0.69) | 0.24 (0.15, 0.37) | -2.55 (-4.17, -0.90) | 0.003  |
| High-income Asia Pacific    | — | — | — | — | 1.80 (0.90, 3.13)  | 1.66 (0.85, 2.87)  | -0.31 (-0.41, -0.20) | <0.001 | 10.70 (4.33, 15.06)  | 1.76 (1.27, 2.45)    | -6.05 (-6.42, -5.68) | <0.001 | 0.16 (0.06, 0.22) | 0.02 (0.02, 0.03) | -6.29 (-6.68, -5.90) | <0.001 |
| Central Europe              | — | — | — | — | 0.46 (0.21, 0.85)  | 0.38 (0.17, 0.67)  | -0.71 (-0.74, -0.69) | <0.001 | 4.97 (3.49, 5.94)    | 3.88 (2.06, 5.14)    | -0.94 (-1.23, -0.65) | <0.001 | 0.07 (0.05, 0.09) | 0.06 (0.03, 0.08) | -0.94 (-1.23, -0.64) | <0.001 |
| Andean Latin America        | — | — | — | — | 1.43 (0.62, 2.65)  | 1.57 (0.67, 2.92)  | 0.32 (0.29, 0.34)    | <0.001 | 27.21 (18.72, 37.08) | 13.28 (8.80, 19.63)  | -2.39 (-3.14, -1.64) | <0.001 | 0.41 (0.28, 0.56) | 0.20 (0.13, 0.29) | -2.41 (-3.16, -1.65) | <0.001 |
| Caribbean                   | — | — | — | — | 1.31 (0.60, 2.36)  | 1.31 (0.59, 2.36)  | 0.00 (-0.05, 0.06)   | 0.887  | 28.10 (16.38, 45.40) | 29.02 (15.66, 52.32) | 0.19 (-0.15, 0.53)   | 0.283  | 0.42 (0.24, 0.68) | 0.43 (0.23, 0.79) | 0.19 (-0.16, 0.54)   | 0.284  |
| Southern Latin America      | — | — | — | — | 1.39 (0.70, 2.46)  | 1.14 (0.56, 2.08)  | -0.69 (-0.71, -0.67) | <0.001 | 6.10 (3.76, 8.04)    | 4.55 (2.61, 6.25)    | -0.99 (-1.52, -0.46) | <0.001 | 0.09 (0.05, 0.12) | 0.07 (0.04, 0.09) | -1.00 (-1.54, -0.45) | <0.001 |
| Oceania                     | — | — | — | — | 1.20 (0.56, 2.19)  | 1.10 (0.51, 2.04)  | -0.29 (-0.32, -0.26) | <0.001 | 23.65 (10.13, 46.32) | 23.31 (8.78, 46.93)  | -0.10 (-0.38, 0.19)  | 0.508  | 0.35 (0.15, 0.69) | 0.35 (0.13, 0.70) | -0.09 (-0.38, 0.19)  | 0.520  |
| Australasia                 | — | — | — | — | 0.34 (0.18, 0.52)  | 0.25 (0.13, 0.37)  | -1.01 (-1.01, -1.01) | <0.001 | 0.72 (0.62, 0.82)    | 0.59 (0.49, 0.69)    | -0.70 (-0.70, -0.70) | 0.002  | 0.01 (0.01, 0.01) | 0.01 (0.01, 0.01) | -0.68 (-0.68, -0.68) | 0.003  |

|                      |   |   |   |   |             |             |              |        |               |               |         |        |        |        |              |        |
|----------------------|---|---|---|---|-------------|-------------|--------------|--------|---------------|---------------|---------|--------|--------|--------|--------------|--------|
|                      |   |   |   |   | 0.56)       | 0.42)       | (-1.04,      |        | 0.84)         | 0.69)         | (-1.13, |        | (0.01, | (0.01, | (-1.13,      |        |
|                      |   |   |   |   |             |             | -0.99)       |        |               |               | -0.27)  |        | (0.01, | (0.01, | -0.24)       |        |
| <b>Men</b>           |   |   |   |   |             |             |              |        |               |               |         |        |        |        |              |        |
| Global               | — | — | — | — | 2.06 (1.04, | 1.93 (1.01, | -0.22        | <0.001 | 17.75 (11.21, | 13.26 (9.45,  | -1.00   |        | 0.26   | 0.20   | -1.01        |        |
|                      |   |   |   |   | 3.53)       | 3.31)       | (-0.32,      |        | 22.66)        | 15.93)        | (-1.17, | <0.001 | (0.17, | (0.14, | (-1.18,      | <0.001 |
|                      |   |   |   |   |             |             | -0.12)       |        |               |               | -0.84)  |        | 0.34)  | 0.24)  | -0.85)       |        |
| <b>SDI category</b>  |   |   |   |   |             |             |              |        |               |               |         |        |        |        |              |        |
| High                 | — | — | — | — | 4.47 (2.48, | 5.60 (3.21, | 0.82 (0.61,  | <0.001 | 8.63 (5.91,   | 9.16 (5.13,   | 0.21    |        | 0.12   | 0.13   | 0.18 (-0.11, | 0.228  |
|                      |   |   |   |   | 7.32)       | 9.18)       | 1.03)        |        | 10.14)        | 10.68)        | (-0.07, | 0.145  | (0.08, | (0.07, | 0.47)        |        |
|                      |   |   |   |   |             |             |              |        |               |               | 0.48)   |        | 0.15)  | 0.15)  |              |        |
| High-middle          | — | — | — | — | 1.65 (0.81, | 1.63 (0.83, | -0.04        | 0.331  | 14.61 (10.35, | 7.29 (5.90,   | -2.47   |        | 0.22   | 0.11   | -2.50        |        |
|                      |   |   |   |   | 2.84)       | 2.83)       | (-0.13,      |        | 19.02)        | 9.02)         | (-2.73, | <0.001 | (0.15, | (0.09, | (-2.77,      | <0.001 |
|                      |   |   |   |   |             |             | 0.04)        |        |               |               | -2.20)  |        | 0.28)  | 0.13)  | -2.23)       |        |
| Middle               | — | — | — | — | 2.27 (1.09, | 2.01 (0.99, | -0.43        | <0.001 | 24.50 (13.58, | 16.31 (10.67, | -1.43   |        | 0.36   | 0.24   | -1.44        |        |
|                      |   |   |   |   | 3.96)       | 3.54)       | (-0.49,      |        | 32.74)        | 20.72)        | (-1.63, | <0.001 | (0.20, | (0.16, | (-1.64,      | <0.001 |
|                      |   |   |   |   |             |             | -0.38)       |        |               |               | -1.23)  |        | 0.49)  | 0.31)  | -1.23)       |        |
| Low-middle           | — | — | — | — | 0.98 (0.48, | 0.99 (0.48, | 0.02 (-0.01, | 0.173  | 14.87 (9.47,  | 11.76 (9.04,  | -0.84   |        | 0.22   | 0.18   | -0.84        |        |
|                      |   |   |   |   | 1.73)       | 1.75)       | 0.04)        |        | 20.34)        | 15.00)        | (-1.09, | <0.001 | (0.14, | (0.13, | (-1.09,      | <0.001 |
|                      |   |   |   |   |             |             |              |        |               |               | -0.59)  |        | 0.30)  | 0.22)  | -0.59)       |        |
| Low                  | — | — | — | — | 1.14 (0.53, | 1.30 (0.62, | 0.45 (0.39,  | <0.001 | 18.50 (9.61,  | 18.11 (11.56, | -0.06   |        | 0.28   | 0.27   | -0.06        |        |
|                      |   |   |   |   | 2.09)       | 2.35)       | 0.50)        |        | 27.77)        | 25.11)        | (-0.15, | 0.175  | (0.14, | (0.17, | (-0.15,      | 0.166  |
|                      |   |   |   |   |             |             |              |        |               |               | 0.03)   |        | 0.42)  | 0.38)  | 0.02)        |        |
| <b>21 GBD region</b> |   |   |   |   |             |             |              |        |               |               |         |        |        |        |              |        |
| South Asia           | — | — | — | — | 0.33 (0.15, | 0.34 (0.16, | 0.11 (0.10,  | <0.001 | 6.80 (4.38,   | 6.35 (4.57,   | -0.21   |        | 0.10   | 0.09   | -0.21        |        |
|                      |   |   |   |   | 0.59)       | 0.61)       | 0.13)        |        | 9.67)         | 8.98)         | (-0.91, | 0.564  | (0.07, | (0.07, | (-0.91,      | 0.567  |
|                      |   |   |   |   |             |             |              |        |               |               | 0.50)   |        | 0.14)  | 0.13)  | 0.50)        |        |
| East Asia            | — | — | — | — | 2.91 (1.40, | 3.07 (1.51, | 0.18 (0.14,  | <0.001 | 30.06 (14.30, | 13.07 (7.71,  | -2.91   |        | 0.45   | 0.19   | -2.95        |        |
|                      |   |   |   |   | 5.07)       | 5.43)       | 0.22)        |        | 39.65)        | 16.86)        | (-3.35, | <0.001 | (0.21, | (0.11, | (-3.40,      | <0.001 |
|                      |   |   |   |   |             |             |              |        |               |               | -2.46)  |        | 0.59)  | 0.25)  | -2.49)       |        |
| North Africa and     |   |   |   |   | 2.71 (1.38, | 2.75 (1.39, | 0.05 (0.01,  | 0.020  | 28.27 (16.03, | 24.16 (13.23, | -0.52   |        | 0.42   | 0.36   | -0.53        |        |
| Middle East          | — | — | — | — | 4.71)       | 4.77)       | 0.09)        |        | 52.50)        | 43.36)        | (-0.76, | <0.001 | (0.24, | (0.20, | (-0.77,      | <0.001 |
|                      |   |   |   |   |             |             |              |        |               |               | -0.28)  |        | 0.78)  | 0.65)  | -0.28)       |        |
| Western              | — | — | — | — | 1.97 (0.92, | 1.96 (0.89, | 0.00 (-0.06, | 0.973  | 16.23 (8.59,  | 21.99 (11.14, | 1.07    | <0.001 | 0.24   | 0.33   | 1.08 (0.84,  | <0.001 |

|                             |   |   |   |   |              |              |              |        |               |               |         |        |        |              |             |        |
|-----------------------------|---|---|---|---|--------------|--------------|--------------|--------|---------------|---------------|---------|--------|--------|--------------|-------------|--------|
| Sub-Saharan Africa          |   |   |   |   | 3.54)        | 3.56)        | 0.06)        |        | 25.41)        | 36.99)        | (0.83,  | (0.13, | (0.16, | 1.33)        |             |        |
|                             |   |   |   |   |              |              |              |        |               |               | 1.31)   | 0.38)  | 0.55)  |              |             |        |
|                             |   |   |   |   |              |              |              |        |               |               | 0.29)   | 0.27)  | 0.29)  |              |             |        |
| Southeast Asia              | — | — | — | — | 1.78 (0.84,  | 1.94 (0.93,  | 0.30 (0.27,  | <0.001 | 18.21 (9.86,  | 19.74 (10.57, | (0.10,  | 0.003  | (0.14, | (0.16,       | 0.29 (0.10, | 0.003  |
|                             |   |   |   |   | 3.18)        | 3.52)        | 0.32)        |        | 28.34)        | 25.11)        | 0.48)   |        | 0.42)  | 0.37)        | 0.48)       |        |
|                             |   |   |   |   |              |              |              |        |               |               | -1.01)  | 0.44)  | 0.32)  | -1.02)       |             |        |
| Eastern Sub-Saharan Africa  | — | — | — | — | 1.87 (0.85,  | 1.93 (0.90,  | 0.11 (0.06,  | <0.001 | 29.18 (14.46, | 21.69 (12.91, | (-1.15, | <0.001 | (0.21, | (0.19,       | (-1.16,     | <0.001 |
|                             |   |   |   |   | 3.45)        | 3.58)        | 0.17)        |        | 45.24)        | 35.02)        | -0.87)  |        | 0.67)  | 0.52)        | -0.88)      |        |
|                             |   |   |   |   |              |              |              |        |               |               | -1.40)  | 0.17)  | 0.11)  | -1.41)       |             |        |
| Central Latin America       | — | — | — | — | 0.82 (0.39,  | 0.83 (0.40,  | 0.05 (0.01,  | 0.016  | 11.20 (8.97,  | 7.35 (5.55,   | (-1.74, | <0.001 | (0.13, | (0.08,       | (-1.75,     | <0.001 |
|                             |   |   |   |   | 1.47)        | 1.49)        | 0.10)        |        | 13.74)        | 10.03)        | -1.06)  |        | 0.20)  | 0.15)        | -1.07)      |        |
|                             |   |   |   |   |              |              |              |        |               |               | -0.90)  | 0.23)  | 0.18)  | -0.92)       |             |        |
| Tropical Latin America      | — | — | — | — | 0.92 (0.44,  | 0.92 (0.42,  | 0.03 (-0.02, | 0.204  | 15.46 (12.24, | 11.80 (9.91,  | (-1.28, | <0.001 | (0.18, | (0.15,       | (-1.29,     | <0.001 |
|                             |   |   |   |   | 1.62)        | 1.66)        | 0.07)        |        | 18.51)        | 15.30)        | -0.53)  |        | 0.28)  | 0.23)        | -0.54)      |        |
|                             |   |   |   |   |              |              |              |        |               |               | -0.75)  | 0.34)  | 0.28)  | -0.76)       |             |        |
| Central Sub-Saharan Africa  | — | — | — | — | 0.77 (0.33,  | 0.78 (0.33,  | 0.09 (-0.04, | 0.192  | 23.00 (8.67,  | 18.54 (9.35,  | (-0.98, | <0.001 | (0.13, | (0.14,       | (-0.99,     | <0.001 |
|                             |   |   |   |   | 1.52)        | 1.55)        | 0.22)        |        | 43.43)        | 32.90)        | -0.52)  |        | 0.65)  | 0.49)        | -0.52)      |        |
|                             |   |   |   |   |              |              |              |        |               |               | -2.25)  | 0.06)  | 0.03)  | -2.29)       |             |        |
| Western Europe              | — | — | — | — | 0.83 (0.46,  | 0.71 (0.38,  | (-0.64,      | <0.001 | 3.95 (2.51,   | 2.11 (1.56,   | (-2.79, | <0.001 | (0.04, | (0.02,       | (-2.87,     | <0.001 |
|                             |   |   |   |   | 1.36)        | 1.16)        | -0.44)       |        | 5.05)         | 3.09)         | -1.71)  |        | 0.07)  | 0.05)        | -1.70)      |        |
|                             |   |   |   |   |              |              |              |        |               |               | 2.37)   | 0.13)  | 0.28)  |              |             |        |
| High-income North America   | — | — | — | — | 11.14 (6.14, | 13.04 (7.33, | 0.58 (0.43,  | <0.001 | 9.87 (8.51,   | 19.60 (9.62,  | (1.93,  | <0.001 | (0.11, | (0.12,       | 2.54 (2.05, | <0.001 |
|                             |   |   |   |   | 18.31)       | 21.12)       | 0.73)        |        | 13.66)        | 23.13)        | 2.81)   |        | 0.19)  | 0.33)        | 3.02)       |        |
|                             |   |   |   |   |              |              |              |        |               |               | 0.10)   | 0.15)  | 0.15)  | 0.09 (-0.89, | 0.857       |        |
| Central Asia                | — | — | — | — | 1.05 (0.48,  | 1.20 (0.56,  | 0.45 (0.39,  | <0.001 | 10.03 (7.38,  | 10.11 (7.45,  | (-0.88, | 0.849  | (0.11, | (0.11,       | 1.08)       |        |
|                             |   |   |   |   | 1.89)        | 2.20)        | 0.51)        |        | 13.17)        | 13.85)        | 1.08)   |        | 0.20)  | 0.21)        |             |        |
|                             |   |   |   |   |              |              |              |        |               |               | 0.78)   | 0.07)  | 0.09)  | 0.79 (-0.31, | 0.160       |        |
| Eastern Europe              | — | — | — | — | 0.12 (0.06,  | 0.13 (0.06,  | 0.14 (0.11,  | <0.001 | 4.71 (3.33,   | 5.74 (4.28,   | (-0.31, | 0.162  | (0.05, | (0.06,       | 1.90)       |        |
|                             |   |   |   |   | 0.21)        | 0.23)        | 0.18)        |        | 5.42)         | 7.46)         | 1.90)   |        | 0.08)  | 0.11)        | 1.90)       |        |
|                             |   |   |   |   |              |              |              |        |               |               | 0.56)   | 0.19)  | 0.22)  | 0.56 (-0.08, | 0.085       |        |
| Southern Sub-Saharan Africa | — | — | — | — | 0.77 (0.35,  | 0.70 (0.32,  | (-0.47,      | <0.001 | 12.81 (8.34,  | 14.91 (10.66, | (-0.07, | 0.082  | (0.12, | (0.16,       | 1.20)       |        |
|                             |   |   |   |   | 1.43)        | 1.27)        | -0.26)       |        | 20.12)        | 21.11)        | 1.19)   |        | 0.30)  | 0.32)        |             |        |
| High-income Asia            | — | — | — | — | 1.96 (1.04,  | 1.79 (0.94,  | -0.34)       | <0.001 | 14.29 (3.81,  | 1.93 (1.32,   | -6.70)  | <0.001 | 0.21)  | 0.03)        | -6.90)      | <0.001 |

|                        |   |   |   |   |              |              |             |        |               |               |         |        |        |        |              |        |
|------------------------|---|---|---|---|--------------|--------------|-------------|--------|---------------|---------------|---------|--------|--------|--------|--------------|--------|
| Pacific                |   |   |   |   | 3.30)        | 3.02)        | (-0.41,     |        | 20.03)        | 3.12)         | (-7.08, |        | (0.05, | (0.02, | (-7.34,      |        |
|                        |   |   |   |   |              |              | -0.27)      |        |               |               | -6.31)  |        | (0.30, | (0.04, | (-6.45)      |        |
|                        |   |   |   |   |              |              | -0.53       |        |               |               | -0.32   |        | 0.11   | 0.10   | -0.32        |        |
| Central Europe         | — | — | — | — | 0.65 (0.31,  | 0.55 (0.28,  | (-0.57,     | <0.001 | 7.11 (5.89,   | 6.77 (4.26,   | (-0.64, | 0.047  | (0.09, | (0.06, | (-0.64,      | 0.048  |
|                        |   |   |   |   | 1.14)        | 0.94)        | (-0.48)     |        | 8.56)         | 9.04)         | (-0.00) |        | (0.13, | (0.14, | (-0.00)      |        |
|                        |   |   |   |   |              |              | -0.59       |        |               |               | -0.59   |        | 0.47   | 0.39   | -0.60        |        |
| Andean Latin America   | — | — | — | — | 1.55 (0.69,  | 1.71 (0.76,  | 0.34 (0.32, | <0.001 | 31.24 (21.70, | 25.99 (15.78, | (-0.89, | <0.001 | (0.32, | (0.24, | (-0.89,      | <0.001 |
|                        |   |   |   |   | 2.80)        | 3.07)        | 0.36)       |        | 43.03)        | 39.95)        | (-0.30) |        | (0.64, | (0.60, | (-0.30)      |        |
|                        |   |   |   |   |              |              | 0.02 (0.01, |        |               |               | 0.33    |        | 0.23   | 0.25   | 0.33 (0.01,  |        |
| Caribbean              | — | — | — | — | 1.21 (0.56,  | 1.22 (0.56,  | 0.04)       | 0.001  | 15.69 (11.82, | 16.94 (10.80, | (0.01,  | 0.043  | (0.18, | (0.16, | 0.33 (0.01,  | 0.043  |
|                        |   |   |   |   | 2.21)        | 2.23)        | 0.04)       |        | 20.93)        | 24.79)        | (0.65)  |        | (0.31, | (0.37) | 0.65)        |        |
|                        |   |   |   |   |              |              | -0.51       |        |               |               | -1.24   |        | 0.18   | 0.13   | -1.25        |        |
| Southern Latin America | — | — | — | — | 1.63 (0.84,  | 1.40 (0.69,  | (-0.57,     | <0.001 | 12.32 (6.44,  | 8.55 (4.94,   | (-1.60, | <0.001 | (0.09, | (0.07, | (-1.61,      | <0.001 |
|                        |   |   |   |   | 2.74)        | 2.40)        | (-0.45)     |        | 17.42)        | 12.46)        | (-0.88) |        | (0.26, | (0.19) | (-0.88)      |        |
|                        |   |   |   |   |              |              | -0.10       |        |               |               | 0.18    |        | 0.44   | 0.47   | 0.18 (-0.02, |        |
| Oceania                | — | — | — | — | 1.36 (0.64,  | 1.33 (0.63,  | (-0.11,     | <0.001 | 29.25 (15.84, | 31.55 (14.90, | (-0.02, | 0.078  | (0.24, | (0.22, | 0.39)        | 0.074  |
|                        |   |   |   |   | 2.44)        | 2.36)        | (-0.09)     |        | 53.22)        | 58.34)        | (0.39)  |        | (0.80, | (0.88) | 0.39)        |        |
|                        |   |   |   |   |              |              | -0.98       |        |               |               | -2.04   |        | 0.02   | 0.01   | -2.07        |        |
| Australasia            | — | — | — | — | 0.42 (0.24,  | 0.32 (0.17,  | (-1.08,     | <0.001 | 1.59 (1.14,   | 0.87 (0.66,   | (-2.46, | <0.001 | (0.02, | (0.01, | (-2.49,      | <0.001 |
|                        |   |   |   |   | 0.67)        | 0.52)        | (-0.88)     |        | 2.15)         | 1.40)         | (-1.63) |        | (0.03, | (0.02) | (-1.65)      |        |
| <b>25-29 years</b>     |   |   |   |   |              |              |             |        |               |               |         |        |        |        |              |        |
| <b>Women</b>           |   |   |   |   |              |              |             |        |               |               |         |        |        |        |              |        |
|                        |   |   |   |   |              |              | -0.12       |        |               |               | -1.38   |        | 0.50   | 0.33   | -1.40        |        |
| Global                 | — | — | — | — | 6.10 (2.93,  | 5.86 (2.83,  | (-0.18,     | <0.001 | 31.30 (18.66, | 20.66 (15.17, | (-1.86, | <0.001 | (0.30, | (0.24, | (-1.90,      | <0.001 |
|                        |   |   |   |   | 10.66)       | 10.39)       | (-0.06)     |        | 43.16)        | 25.66)        | (-0.89) |        | (0.69, | (0.41) | (-0.91)      |        |
| <b>SDI category</b>    |   |   |   |   |              |              |             |        |               |               |         |        |        |        |              |        |
|                        |   |   |   |   |              |              | 0.53 (0.42, |        |               |               | 0.18    |        | 0.12   | 0.13   | 0.25 (-0.00, |        |
| High                   | — | — | — | — | 13.63 (7.07, | 15.63 (8.44, | 0.64)       | <0.001 | 8.77 (7.02,   | 9.10 (5.71,   | (-0.13, | 0.246  | (0.10, | (0.07, | 0.50)        | 0.052  |
|                        |   |   |   |   | 23.28)       | 26.09)       | 0.64)       |        | 10.21)        | 10.68)        | (0.49)  |        | (0.14, | (0.15) | 0.50)        |        |
|                        |   |   |   |   |              |              | 0.36 (0.27, |        |               |               | -2.61   |        | 0.22   | 0.10   | -2.91        |        |
| High-middle            | — | — | — | — | 4.69 (2.16,  | 5.19 (2.41,  | 0.45)       | <0.001 | 14.03 (11.16, | 6.42 (5.38,   | (-3.42, | <0.001 | (0.17, | (0.08, | (-3.69,      | <0.001 |
|                        |   |   |   |   | 8.31)        | 9.39)        | 0.45)       |        | 17.42)        | 7.67)         | (-1.80) |        | (0.27, | (0.12) | (-2.13)      |        |
|                        |   |   |   |   |              |              | -0.02       | 0.345  |               |               | -2.48   | <0.001 | 0.60   | 0.28   | -2.54        | <0.001 |
| Middle                 | — | — | — | — | 6.42 (2.89,  | 6.38 (2.87,  | -0.02       | 0.345  | 37.37 (25.18, | 17.70 (12.89, | -2.48   | <0.001 | 0.60   | 0.28   | -2.54        | <0.001 |



| Region                       | DALYs (1990)       | DALYs (2019)        | Rate (1990)          | Rate (2019) | DALYs (1990-2019)      |                      |                     |              | DALYs (2019) |             |              |             |
|------------------------------|--------------------|---------------------|----------------------|-------------|------------------------|----------------------|---------------------|--------------|--------------|-------------|--------------|-------------|
|                              |                    |                     |                      |             | Rate (1990)            | Rate (2019)          | Rate (1990)         | Rate (2019)  | Rate (1990)  | Rate (2019) | Rate (1990)  | Rate (2019) |
| High                         | 11.52              | 11.48               | 11.52                | 11.48       | -0.06, 0.02            | 47.87                | 21.38               | -3.26, -1.70 | 0.39, 0.77   | 0.20, 0.34  | -3.33, -1.75 |             |
| Low-middle                   | 2.78 (1.22, 5.10)  | 2.88 (1.26, 5.36)   | 0.12 (0.10, 0.14)    | <0.001      | 38.06 (16.74, 59.28)   | 23.54 (15.48, 32.39) | -1.62, -1.93, -1.30 | <0.001       | 0.27, 0.96   | 0.25, 0.52  | -1.95, -1.31 | <0.001      |
| Low                          | 2.86 (1.15, 5.72)  | 3.20 (1.29, 6.44)   | 0.40 (0.36, 0.44)    | <0.001      | 75.47 (29.62, 128.24)  | 48.21 (26.77, 66.74) | -1.54, -1.62, -1.46 | <0.001       | 0.48, 2.08   | 0.43, 1.08  | -1.63, -1.47 | <0.001      |
| <b>21 GBD region</b>         |                    |                     |                      |             |                        |                      |                     |              |              |             |              |             |
| South Asia                   | 1.14 (0.46, 2.21)  | 1.19 (0.48, 2.29)   | 0.17 (0.15, 0.20)    | <0.001      | 25.86 (6.55, 46.49)    | 15.36 (8.92, 23.69)  | -1.79, -2.52, -1.04 | <0.001       | 0.42, 0.75   | 0.25, 0.38  | -1.79, -1.05 | <0.001      |
| East Asia                    | 8.07 (3.63, 14.49) | 8.74 (3.97, 15.70)  | 0.27 (0.24, 0.29)    | <0.001      | 32.00 (21.14, 42.44)   | 8.70 (5.96, 11.66)   | -4.39, -6.32, -2.41 | <0.001       | 0.33, 0.68   | 0.08, 0.18  | -6.71, -2.52 | <0.001      |
| North Africa and Middle East | 9.94 (4.58, 17.71) | 10.46 (4.84, 18.62) | 0.17 (0.14, 0.20)    | <0.001      | 55.46 (27.02, 82.50)   | 35.28 (22.32, 50.23) | -1.46, -1.80, -1.13 | <0.001       | 0.89, 1.33   | 0.56, 0.80  | -1.50, -1.15 | <0.001      |
| Western Sub-Saharan Africa   | 4.22 (1.64, 8.66)  | 4.31 (1.61, 9.04)   | 0.09 (0.04, 0.14)    | 0.001       | 61.94 (33.07, 89.29)   | 58.89 (31.34, 83.04) | -0.15, -0.28, -0.03 | 0.014        | 1.00, 1.44   | 0.95, 1.34  | -0.15, -0.03 | 0.014       |
| Southeast Asia               | 5.19 (2.26, 9.35)  | 5.47 (2.38, 9.85)   | 0.18 (0.15, 0.21)    | <0.001      | 38.78 (18.79, 58.22)   | 23.64 (14.46, 30.18) | -1.65, -1.84, -1.46 | <0.001       | 0.62, 0.94   | 0.38, 0.48  | -1.68, -1.48 | <0.001      |
| Eastern Sub-Saharan Africa   | 3.66 (1.34, 7.62)  | 3.73 (1.39, 7.85)   | 0.07 (0.05, 0.09)    | <0.001      | 123.58 (49.74, 221.92) | 52.57 (29.59, 74.58) | -2.89, -3.05, -2.73 | <0.001       | 2.00, 3.60   | 0.85, 1.21  | -2.90, -2.74 | <0.001      |
| Central Latin America        | 3.34 (1.46, 6.30)  | 3.25 (1.38, 6.05)   | -0.10 (-0.13, -0.06) | <0.001      | 16.49 (12.30, 18.94)   | 9.22 (6.59, 13.69)   | -1.97, -2.54, -1.40 | <0.001       | 0.26, 0.30   | 0.14, 0.22  | -2.02, -1.42 | <0.001      |
| Tropical Latin America       | 3.73 (1.59, 6.83)  | 3.69 (1.50, 7.11)   | -0.04 (-0.06, -0.02) | 0.001       | 27.21 (18.54, 30.92)   | 12.12 (9.98, 19.55)  | -2.76, -3.10, -2.42 | <0.001       | 0.44, 0.50   | 0.19, 0.31  | -2.82, -2.47 | <0.001      |

|                             |   |   |   |   |                      |                      |                      |        |                       |                      |                      |        |                   |                   |                      |        |
|-----------------------------|---|---|---|---|----------------------|----------------------|----------------------|--------|-----------------------|----------------------|----------------------|--------|-------------------|-------------------|----------------------|--------|
| Central Sub-Saharan Africa  | — | — | — | — | 1.96 (0.68, 4.17)    | 1.93 (0.68, 4.19)    | -0.04 (-0.10, 0.03)  | 0.282  | 60.35 (24.32, 104.83) | 39.18 (19.48, 63.09) | -1.50 (-1.60, -1.41) | <0.001 | 0.98 (0.39, 1.70) | 0.63 (0.31, 1.02) | -1.51 (-1.60, -1.42) | <0.001 |
| Western Europe              | — | — | — | — | 2.04 (1.02, 3.57)    | 1.62 (0.78, 2.85)    | -0.80 (-0.85, -0.75) | <0.001 | 2.64 (1.67, 3.13)     | 1.68 (1.15, 2.08)    | -1.64 (-1.75, -1.53) | <0.001 | 0.04 (0.02, 0.05) | 0.02 (0.02, 0.03) | -1.69 (-1.81, -1.57) | <0.001 |
| High-income North America   | — | — | — | — | 32.21 (16.88, 55.26) | 36.10 (19.47, 60.72) | 0.46 (0.25, 0.66)    | <0.001 | 11.91 (9.77, 16.05)   | 18.62 (10.70, 22.13) | 1.60 (1.17, 2.03)    | <0.001 | 0.15 (0.13, 0.21) | 0.25 (0.12, 0.30) | 1.92 (1.42, 2.43)    | <0.001 |
| Central Asia                | — | — | — | — | 1.77 (0.64, 3.48)    | 1.83 (0.66, 3.79)    | 0.11 (0.05, 0.18)    | 0.001  | 12.73 (9.25, 15.65)   | 10.69 (7.68, 14.40)  | -0.60 (-0.89, -0.31) | <0.001 | 0.20 (0.15, 0.25) | 0.17 (0.12, 0.23) | -0.61 (-0.90, -0.32) | <0.001 |
| Eastern Europe              | — | — | — | — | 0.17 (0.06, 0.34)    | 0.17 (0.07, 0.34)    | 0.02 (-0.05, 0.09)   | 0.566  | 2.03 (1.21, 2.39)     | 3.37 (1.72, 4.58)    | 1.73 (0.58, 2.89)    | 0.003  | 0.03 (0.02, 0.04) | 0.05 (0.03, 0.07) | 1.75 (0.59, 2.92)    | 0.003  |
| Southern Sub-Saharan Africa | — | — | — | — | 1.69 (0.65, 3.46)    | 1.52 (0.58, 3.13)    | -0.38 (-0.42, -0.33) | <0.001 | 97.45 (68.56, 124.68) | 43.36 (22.55, 69.95) | -2.59 (-4.55, -0.60) | 0.011  | 1.58 (1.11, 2.02) | 0.70 (0.36, 1.13) | -2.60 (-4.57, -0.60) | 0.011  |
| High-income Asia Pacific    | — | — | — | — | 5.48 (2.63, 9.97)    | 4.71 (2.27, 8.45)    | -0.54 (-0.62, -0.45) | <0.001 | 13.00 (4.95, 17.45)   | 2.04 (1.49, 2.73)    | -6.30 (-6.79, -5.81) | <0.001 | 0.20 (0.07, 0.27) | 0.03 (0.02, 0.04) | -6.95 (-7.48, -6.43) | <0.001 |
| Central Europe              | — | — | — | — | 1.56 (0.60, 3.08)    | 1.35 (0.61, 2.49)    | -0.49 (-0.58, -0.40) | <0.001 | 7.05 (5.75, 8.65)     | 5.69 (3.86, 7.61)    | -0.63 (-1.50, 0.24)  | 0.155  | 0.11 (0.09, 0.14) | 0.09 (0.06, 0.12) | -0.64 (-1.52, 0.25)  | 0.160  |
| Andean Latin America        | — | — | — | — | 5.20 (2.13, 9.86)    | 5.62 (2.25, 10.58)   | 0.27 (0.24, 0.30)    | <0.001 | 33.03 (22.95, 46.66)  | 15.79 (10.37, 23.02) | -2.63 (-3.39, -1.86) | <0.001 | 0.53 (0.36, 0.75) | 0.25 (0.16, 0.37) | -2.70 (-3.48, -1.91) | <0.001 |
| Caribbean                   | — | — | — | — | 4.43 (1.85, 8.12)    | 4.41 (1.90, 8.07)    | -0.01 (-0.05, 0.03)  | 0.577  | 37.27 (21.82, 61.29)  | 39.05 (21.07, 67.82) | 0.25 (-0.15, 0.66)   | 0.216  | 0.60 (0.35, 0.99) | 0.63 (0.34, 1.10) | 0.26 (-0.15, 0.67)   | 0.216  |
| Southern Latin America      | — | — | — | — | 5.10 (2.41, 9.13)    | 3.98 (1.88, 7.20)    | -0.85 (-0.87, -0.84) | <0.001 | 11.80 (8.35, 15.63)   | 7.37 (5.20, 10.06)   | -1.65 (-2.10, -1.20) | <0.001 | 0.18 (0.13, 0.25) | 0.11 (0.08, 0.16) | -1.69 (-2.15, -1.22) | <0.001 |

|                      |   |   |   |   |                         |                         |                            |        |                          |                          |                            |        |                         |                         |                            |        |
|----------------------|---|---|---|---|-------------------------|-------------------------|----------------------------|--------|--------------------------|--------------------------|----------------------------|--------|-------------------------|-------------------------|----------------------------|--------|
| Oceania              | — | — | — | — | 4.37 (1.87,<br>8.27)    | 3.90 (1.73,<br>7.16)    | -0.39<br>(-0.42,<br>-0.36) | <0.001 | 64.35 (30.08,<br>117.69) | 59.72 (25.08,<br>121.38) | -0.27<br>(-0.49,<br>-0.05) | 0.015  | 1.04<br>(0.48,<br>1.91) | 0.96<br>(0.40,<br>1.96) | -0.27<br>(-0.49,<br>-0.05) | 0.016  |
| Australasia          | — | — | — | — | 0.91 (0.42,<br>1.66)    | 0.64 (0.29,<br>1.16)    | -1.22<br>(-1.25,<br>-1.20) | <0.001 | 0.88 (0.73,<br>1.03)     | 0.64 (0.53,<br>0.76)     | -1.04<br>(-1.60,<br>-0.47) | <0.001 | 0.01<br>(0.01,<br>0.01) | 0.01<br>(0.01,<br>0.01) | -1.01<br>(-1.62,<br>-0.40) | 0.001  |
| <b>Men</b>           |   |   |   |   |                         |                         |                            |        |                          |                          |                            |        |                         |                         |                            |        |
| Global               | — | — | — | — | 7.77 (3.87,<br>13.38)   | 7.78 (3.94,<br>13.35)   | 0.02 (-0.03,<br>0.07)      | 0.432  | 28.95 (22.04,<br>33.94)  | 23.40 (16.24,<br>27.32)  | -0.72<br>(-0.87,<br>-0.56) | <0.001 | 0.46<br>(0.34,<br>0.54) | 0.37<br>(0.25,<br>0.43) | -0.74<br>(-0.91,<br>-0.57) | <0.001 |
| <b>SDI category</b>  |   |   |   |   |                         |                         |                            |        |                          |                          |                            |        |                         |                         |                            |        |
| High                 | — | — | — | — | 19.77 (10.32,<br>33.43) | 25.21 (13.69,<br>41.81) | 0.88 (0.78,<br>0.98)       | <0.001 | 16.56 (13.84,<br>19.41)  | 21.32 (12.17,<br>25.18)  | 0.88<br>(0.51,<br>1.26)    | <0.001 | 0.24<br>(0.19,<br>0.28) | 0.31<br>(0.16,<br>0.37) | 0.88 (0.51,<br>1.25)       | <0.001 |
| High-middle          | — | — | — | — | 5.24 (2.44,<br>9.24)    | 5.91 (2.82,<br>10.42)   | 0.40 (0.31,<br>0.49)       | <0.001 | 21.51 (17.11,<br>26.36)  | 12.27 (9.87,<br>14.58)   | -1.96<br>(-2.38,<br>-1.55) | <0.001 | 0.34<br>(0.27,<br>0.42) | 0.19<br>(0.15,<br>0.23) | -2.04<br>(-2.47,<br>-1.61) | <0.001 |
| Middle               | — | — | — | — | 7.70 (3.50,<br>13.70)   | 7.58 (3.53,<br>13.84)   | -0.05<br>(-0.10,<br>0.00)  | 0.049  | 38.74 (26.38,<br>47.91)  | 25.70 (15.86,<br>31.10)  | -1.39<br>(-1.57,<br>-1.20) | <0.001 | 0.62<br>(0.42,<br>0.76) | 0.41<br>(0.25,<br>0.49) | -1.42<br>(-1.60,<br>-1.23) | <0.001 |
| Low-middle           | — | — | — | — | 3.23 (1.44,<br>5.75)    | 3.33 (1.52,<br>6.10)    | 0.10 (0.05,<br>0.14)       | <0.001 | 26.67 (18.99,<br>33.78)  | 21.43 (16.30,<br>26.27)  | -0.76<br>(-1.05,<br>-0.46) | <0.001 | 0.43<br>(0.30,<br>0.54) | 0.34<br>(0.26,<br>0.42) | -0.77<br>(-1.07,<br>-0.47) | <0.001 |
| Low                  | — | — | — | — | 3.37 (1.40,<br>6.66)    | 4.00 (1.74,<br>7.82)    | 0.60 (0.53,<br>0.67)       | <0.001 | 38.30 (24.23,<br>52.15)  | 38.26 (23.21,<br>53.32)  | 0.02<br>(-0.18,<br>0.21)   | 0.870  | 0.62<br>(0.39,<br>0.84) | 0.61<br>(0.36,<br>0.86) | 0.01 (-0.19,<br>0.21)      | 0.911  |
| <b>21 GBD region</b> |   |   |   |   |                         |                         |                            |        |                          |                          |                            |        |                         |                         |                            |        |
| South Asia           | — | — | — | — | 0.97 (0.40,<br>1.88)    | 1.01 (0.42,<br>1.94)    | 0.10 (0.08,<br>0.12)       | <0.001 | 13.76 (9.32,<br>20.79)   | 12.29 (8.29,<br>17.98)   | -0.37<br>(-0.83,<br>0.10)  | 0.119  | 0.22<br>(0.15,<br>0.34) | 0.20<br>(0.13,<br>0.29) | -0.37<br>(-0.83,<br>0.10)  | 0.119  |
| East Asia            | — | — | — | — | 9.52 (4.26,<br>16.93)   | 10.40 (4.78,<br>18.24)  | 0.29 (0.19,<br>0.39)       | <0.001 | 44.39 (26.59,<br>55.95)  | 20.17 (11.07,<br>25.48)  | -2.65<br>(-3.12,<br>-2.18) | <0.001 | 0.71<br>(0.42,<br>0.88) | 0.31<br>(0.17,<br>0.39) | -2.75<br>(-3.24,<br>-2.26) | <0.001 |

|                              |   |   |   |   |                      |                       |                      |        |                      |                      |                      |        |                   |                   |                      |        |
|------------------------------|---|---|---|---|----------------------|-----------------------|----------------------|--------|----------------------|----------------------|----------------------|--------|-------------------|-------------------|----------------------|--------|
| North Africa and Middle East | — | — | — | — | 11.31 (5.51, 19.95)  | 11.63 (5.62, 20.54)   | 0.09 (0.07, 0.12)    | <0.001 | 43.41 (24.90, 72.76) | 36.75 (20.66, 60.06) | -0.55 (-0.72, -0.38) | <0.001 | 0.69 (0.39, 1.16) | 0.58 (0.32, 0.96) | -0.57 (-0.75, -0.40) | <0.001 |
| Western Sub-Saharan Africa   | — | — | — | — | 5.33 (2.10, 10.73)   | 5.29 (2.12, 10.61)    | -0.01 (-0.06, 0.04)  | 0.650  | 34.90 (21.54, 50.52) | 47.27 (23.71, 72.08) | 1.06 (0.84, 1.28)    | <0.001 | 0.56 (0.34, 0.80) | 0.76 (0.38, 1.16) | 1.08 (0.86, 1.30)    | <0.001 |
| Southeast Asia               | — | — | — | — | 6.60 (3.06, 11.87)   | 7.14 (3.31, 13.06)    | 0.28 (0.22, 0.33)    | <0.001 | 32.83 (18.62, 46.02) | 31.57 (14.70, 39.33) | -0.09 (-0.27, 0.09)  | 0.329  | 0.52 (0.29, 0.74) | 0.50 (0.23, 0.63) | -0.10 (-0.28, 0.09)  | 0.297  |
| Eastern Sub-Saharan Africa   | — | — | — | — | 5.01 (1.96, 10.30)   | 5.18 (2.05, 10.69)    | 0.10 (0.07, 0.14)    | <0.001 | 62.26 (35.26, 91.70) | 44.19 (24.67, 74.32) | -1.17 (-1.40, -0.95) | <0.001 | 1.00 (0.56, 1.48) | 0.71 (0.39, 1.20) | -1.18 (-1.41, -0.96) | <0.001 |
| Central Latin America        | — | — | — | — | 2.75 (1.19, 5.09)    | 2.74 (1.20, 5.00)     | -0.02 (-0.06, 0.02)  | 0.344  | 17.10 (13.94, 21.05) | 11.13 (8.63, 16.31)  | -1.44 (-1.77, -1.10) | <0.001 | 0.27 (0.22, 0.34) | 0.18 (0.14, 0.26) | -1.47 (-1.81, -1.12) | <0.001 |
| Tropical Latin America       | — | — | — | — | 2.97 (1.33, 5.39)    | 2.95 (1.25, 5.62)     | -0.02 (-0.05, -0.00) | 0.041  | 31.93 (23.63, 37.24) | 19.95 (16.84, 29.51) | -1.58 (-2.02, -1.14) | <0.001 | 0.51 (0.38, 0.60) | 0.32 (0.27, 0.47) | -1.60 (-2.05, -1.16) | <0.001 |
| Central Sub-Saharan Africa   | — | — | — | — | 2.25 (0.83, 4.90)    | 2.29 (0.87, 4.97)     | 0.08 (0.02, 0.14)    | 0.010  | 44.46 (19.29, 73.88) | 35.02 (19.48, 63.08) | -0.89 (-1.03, -0.75) | <0.001 | 0.72 (0.31, 1.20) | 0.56 (0.31, 1.02) | -0.90 (-1.04, -0.76) | <0.001 |
| Western Europe               | — | — | — | — | 2.51 (1.28, 4.32)    | 2.17 (1.07, 3.83)     | -0.50 (-0.58, -0.42) | <0.001 | 6.85 (4.48, 8.47)    | 4.36 (3.17, 5.89)    | -1.51 (-2.15, -0.88) | <0.001 | 0.11 (0.07, 0.13) | 0.07 (0.05, 0.09) | -1.55 (-2.22, -0.88) | <0.001 |
| High-income North America    | — | — | — | — | 49.35 (26.03, 83.17) | 62.98 (34.25, 104.38) | 0.89 (0.66, 1.11)    | <0.001 | 23.59 (19.81, 34.49) | 48.03 (24.73, 58.23) | 2.59 (2.03, 3.15)    | <0.001 | 0.31 (0.27, 0.48) | 0.69 (0.31, 0.84) | 2.85 (2.33, 3.36)    | <0.001 |
| Central Asia                 | — | — | — | — | 4.06 (1.71, 7.74)    | 4.55 (1.88, 8.54)     | 0.40 (0.35, 0.44)    | <0.001 | 24.89 (18.42, 33.48) | 22.73 (17.13, 32.12) | -0.34 (-0.81, 0.15)  | 0.172  | 0.40 (0.29, 0.54) | 0.36 (0.27, 0.51) | -0.35 (-0.83, 0.14)  | 0.158  |
| Eastern Europe               | — | — | — | — | 0.31 (0.13, 0.60)    | 0.32 (0.13, 0.60)     | 0.04 (0.00, 0.08)    | 0.039  | 7.73 (4.23, 9.17)    | 10.26 (6.95, 13.24)  | 1.09 (-0.37, 2.57)   | 0.143  | 0.13 (0.07, 0.15) | 0.17 (0.11, 0.21) | 1.10 (-0.36, 2.57)   | 0.140  |

|                     |   |   |   |   |               |               |              |        |               |               |         |        |        |              |         |        |
|---------------------|---|---|---|---|---------------|---------------|--------------|--------|---------------|---------------|---------|--------|--------|--------------|---------|--------|
| Southern            |   |   |   |   | 1.83 (0.72,   | 1.68 (0.67,   | -0.34        |        | 45.34 (31.03, | 36.55 (26.01, | -0.83   | 0.73   | 0.59   | -0.84        |         |        |
| Sub-Saharan Africa  | — | — | — | — | 3.77)         | 3.43)         | (-0.42,      | <0.001 | 65.95)        | 51.37)        | (-1.58, | 0.031  | (0.50, | (0.42,       | (-1.59, | 0.031  |
|                     |   |   |   |   |               |               | -0.25)       |        |               |               | -0.07)  |        | 1.07)  | 0.83)        | -0.08)  |        |
| High-income Asia    |   |   |   |   | 6.48 (3.25,   | 5.88 (2.99,   | -0.33        |        | 22.42 (8.75,  | 4.35 (3.11,   | -5.52   | 0.35   | 0.06   | -5.88        |         |        |
| Pacific             | — | — | — | — | 11.60)        | 10.64)        | (-0.48,      | <0.001 | 31.01)        | 7.02)         | (-5.79, | <0.001 | (0.13, | (0.04,       | (-6.19, | <0.001 |
|                     |   |   |   |   |               |               | -0.17)       |        |               |               | -5.25)  |        | 0.49)  | 0.11)        | -5.58)  |        |
| Central Europe      | — | — | — | — | 2.49 (1.15,   | 2.22 (1.06,   | -0.39        |        | 13.80 (11.69, | 14.06 (9.45,  | 0.09    | 0.22   | 0.22   | 0.10 (-0.14, | 0.415   |        |
|                     |   |   |   |   | 4.61)         | 3.97)         | (-0.43,      | <0.001 | 17.53)        | 18.11)        | (-0.14, | 0.435  | (0.19, | (0.15,       | 0.34)   |        |
|                     |   |   |   |   |               |               | -0.35)       |        |               |               | 0.32)   |        | 0.28)  | 0.29)        |         |        |
| Andean Latin        |   |   |   |   | 5.65 (2.34,   | 6.14 (2.58,   | 0.30 (0.25,  |        | 31.77 (22.81, | 26.49 (17.30, | -0.64   | 0.51   | 0.42   | -0.65        |         |        |
| America             | — | — | — | — | 10.75)        | 11.39)        | 0.35)        | <0.001 | 42.37)        | 41.29)        | (-0.99, | <0.001 | (0.36, | (0.27,       | (-1.02, | <0.001 |
|                     |   |   |   |   |               |               |              |        |               |               | -0.28)  |        | 0.67)  | 0.66)        | -0.29)  |        |
| Caribbean           | — | — | — | — | 4.14 (1.77,   | 4.14 (1.83,   | 0.01 (-0.03, | 0.619  | 27.35 (20.73, | 30.27 (20.67, | 0.40    | 0.44   | 0.49   | 0.39 (0.07,  | 0.018   |        |
|                     |   |   |   |   | 7.66)         | 7.74)         | 0.05)        |        | 35.80)        | 44.58)        | (0.12,  | 0.004  | (0.33, | (0.33,       | 0.72)   |        |
|                     |   |   |   |   |               |               |              |        |               |               | 0.67)   |        | 0.57)  | 0.72)        |         |        |
| Southern Latin      |   |   |   |   | 5.90 (2.84,   | 5.01 (2.37,   | -0.56        |        | 15.51 (9.02,  | 11.29 (6.87,  | -1.06   | 0.24   | 0.18   | -1.08        |         |        |
| America             | — | — | — | — | 10.52)        | 8.78)         | (-0.57,      | <0.001 | 21.59)        | 16.24)        | (-1.47, | <0.001 | (0.14, | (0.10,       | (-1.50, | <0.001 |
|                     |   |   |   |   |               |               | -0.54)       |        |               |               | -0.65)  |        | 0.34)  | 0.26)        | -0.66)  |        |
| Oceania             | — | — | — | — | 5.05 (2.29,   | 4.92 (2.21,   | -0.09        |        | 44.38 (23.23, | 47.52 (21.87, | 0.22    | 0.71   | 0.76   | 0.22 (0.11,  | <0.001  |        |
|                     |   |   |   |   | 9.50)         | 8.97)         | (-0.10,      | <0.001 | 80.28)        | 90.28)        | (0.11,  | <0.001 | (0.37, | (0.34,       | 0.34)   |        |
|                     |   |   |   |   |               |               | -0.08)       |        |               |               | 0.33)   |        | 1.29)  | 1.46)        |         |        |
| Australasia         | — | — | — | — | 1.27 (0.61,   | 0.94 (0.44,   | -1.05        |        | 3.58 (2.07,   | 2.45 (1.38,   | -1.34   | 0.06   | 0.04   | -1.34        |         |        |
|                     |   |   |   |   | 2.25)         | 1.66)         | (-1.11,      | <0.001 | 5.17)         | 3.81)         | (-1.94, | <0.001 | (0.03, | (0.02,       | (-1.96, | <0.001 |
|                     |   |   |   |   |               |               | -0.98)       |        |               |               | -0.73)  |        | 0.08)  | 0.06)        | -0.72)  |        |
| <b>30-34 years</b>  |   |   |   |   |               |               |              |        |               |               |         |        |        |              |         |        |
| <b>Women</b>        |   |   |   |   |               |               |              |        |               |               |         |        |        |              |         |        |
| Global              | — | — | — | — | 12.79 (7.03,  | 12.45 (6.78,  | -0.08        | 0.012  | 55.86 (35.83, | 35.99 (26.96, | -1.47   | 0.97   | 0.62   | -1.51        | <0.001  |        |
|                     |   |   |   |   | 21.14)        | 20.75)        | (-0.15,      |        | 75.34)        | 43.32)        | (-1.84, | <0.001 | (0.61, | (0.46,       | (-1.89, |        |
|                     |   |   |   |   |               |               | -0.02)       |        |               |               | -1.09)  |        | 1.31)  | 0.75)        | -1.13)  |        |
| <b>SDI category</b> |   |   |   |   |               |               |              |        |               |               |         |        |        |              |         |        |
| High                | — | — | — | — | 33.24 (19.78, | 35.03 (21.24, | 0.22 (0.09,  | 0.001  | 17.79 (15.30, | 21.43 (13.57, | 0.66    | 0.26   | 0.32   | 0.81 (0.44,  | <0.001  |        |
|                     |   |   |   |   | 51.94)        | 54.42)        | 0.35)        |        | 21.33)        | 24.65)        | (0.24,  | 0.002  | (0.23, | (0.18,       | 1.17)   |        |
|                     |   |   |   |   |               |               |              |        |               |               | 1.09)   |        | 0.31)  | 0.37)        |         |        |

|                                 |   |   |   |   |                         |                         |                      |        |                              |                          |                            |        |                         |                         |                            |        |
|---------------------------------|---|---|---|---|-------------------------|-------------------------|----------------------|--------|------------------------------|--------------------------|----------------------------|--------|-------------------------|-------------------------|----------------------------|--------|
| High-middle                     | — | — | — | — | 7.90 (3.88,<br>13.79)   | 9.73 (4.91,<br>16.88)   | 0.72 (0.64,<br>0.81) | <0.001 | 26.23 (20.97,<br>32.05)      | 12.26 (10.16,<br>14.73)  | -2.57<br>(-3.41,<br>-1.72) | <0.001 | 0.45<br>(0.36,<br>0.56) | 0.20<br>(0.17,<br>0.24) | -2.72<br>(-3.66,<br>-1.77) | <0.001 |
| Middle                          | — | — | — | — | 11.85 (5.81,<br>20.65)  | 13.00 (6.58,<br>22.37)  | 0.32 (0.28,<br>0.37) | <0.001 | 70.64 (47.75,<br>88.40)      | 32.03 (23.41,<br>38.55)  | -2.69<br>(-2.98,<br>-2.40) | <0.001 | 1.23<br>(0.82,<br>1.54) | 0.54<br>(0.40,<br>0.66) | -2.81<br>(-3.15,<br>-2.47) | <0.001 |
| Low-middle                      | — | — | — | — | 4.87 (2.31,<br>8.64)    | 5.54 (2.60,<br>9.91)    | 0.46 (0.36,<br>0.56) | <0.001 | 70.91 (32.49,<br>110.35)     | 44.34 (29.68,<br>59.17)  | -1.54<br>(-1.72,<br>-1.37) | <0.001 | 1.24<br>(0.56,<br>1.94) | 0.77<br>(0.52,<br>1.04) | -1.56<br>(-1.74,<br>-1.39) | <0.001 |
| Low                             | — | — | — | — | 6.19 (2.71,<br>11.43)   | 6.92 (3.02,<br>12.73)   | 0.39 (0.38,<br>0.40) | <0.001 | 129.16<br>(54.63,<br>211.93) | 83.18 (47.95,<br>112.58) | -1.53<br>(-1.63,<br>-1.42) | <0.001 | 2.27<br>(0.95,<br>3.73) | 1.46<br>(0.84,<br>1.98) | -1.53<br>(-1.64,<br>-1.43) | <0.001 |
| <b>21 GBD region</b>            |   |   |   |   |                         |                         |                      |        |                              |                          |                            |        |                         |                         |                            |        |
| South Asia                      | — | — | — | — | 2.35 (1.08,<br>4.22)    | 2.47 (1.13,<br>4.50)    | 0.17 (0.11,<br>0.23) | <0.001 | 50.30 (15.17,<br>88.60)      | 30.69 (18.29,<br>45.45)  | -1.70<br>(-2.30,<br>-1.09) | <0.001 | 0.88<br>(0.26,<br>1.56) | 0.54<br>(0.32,<br>0.80) | -1.71<br>(-2.31,<br>-1.10) | <0.001 |
| East Asia                       | — | — | — | — | 14.73 (7.25,<br>25.35)  | 16.57 (8.55,<br>28.61)  | 0.40 (0.32,<br>0.48) | <0.001 | 59.61 (40.71,<br>79.47)      | 16.53 (11.35,<br>22.35)  | -4.14<br>(-5.83,<br>-2.42) | <0.001 | 1.03<br>(0.70,<br>1.38) | 0.27<br>(0.17,<br>0.36) | -4.60<br>(-6.16,<br>-3.03) | <0.001 |
| North Africa and<br>Middle East | — | — | — | — | 21.58 (11.08,<br>36.18) | 22.78 (11.85,<br>38.24) | 0.18 (0.16,<br>0.21) | <0.001 | 89.92 (44.18,<br>129.15)     | 57.24 (36.14,<br>79.33)  | -1.49<br>(-1.63,<br>-1.34) | <0.001 | 1.55<br>(0.75,<br>2.24) | 0.97<br>(0.61,<br>1.36) | -1.54<br>(-1.69,<br>-1.39) | <0.001 |
| Western<br>Sub-Saharan Africa   | — | — | — | — | 9.06 (3.97,<br>16.92)   | 9.34 (4.01,<br>17.75)   | 0.10 (0.07,<br>0.14) | <0.001 | 97.37 (56.24,<br>134.82)     | 89.77 (48.50,<br>122.35) | -0.26<br>(-0.38,<br>-0.15) | <0.001 | 1.70<br>(0.97,<br>2.36) | 1.57<br>(0.85,<br>2.14) | -0.26<br>(-0.38,<br>-0.15) | <0.001 |
| Southeast Asia                  | — | — | — | — | 10.94 (5.28,<br>18.82)  | 11.51 (5.68,<br>19.70)  | 0.17 (0.16,<br>0.18) | <0.001 | 74.24 (38.20,<br>112.09)     | 46.58 (28.47,<br>59.45)  | -1.55<br>(-1.63,<br>-1.47) | <0.001 | 1.29<br>(0.66,<br>1.96) | 0.80<br>(0.49,<br>1.03) | -1.58<br>(-1.66,<br>-1.50) | <0.001 |
| Eastern Sub-Saharan<br>Africa   | — | — | — | — | 8.12 (3.33,<br>15.44)   | 8.34 (3.47,<br>15.66)   | 0.09 (0.07,<br>0.10) | <0.001 | 204.66<br>(89.57,<br>360.14) | 89.17 (49.60,<br>126.14) | -2.82<br>(-2.96,<br>-2.68) | <0.001 | 3.60<br>(1.57,<br>6.33) | 1.56<br>(0.87,<br>2.22) | -2.83<br>(-2.97,<br>-2.69) | <0.001 |
| Central Latin<br>America        | — | — | — | — | 2.46 (0.33,<br>6.64)    | 3.55 (0.64,<br>8.31)    | 1.26 (1.10,<br>1.43) | <0.001 | 31.21 (22.10,<br>35.45)      | 15.42 (11.22,<br>24.83)  | -2.31<br>(-2.72,<br>-1.90) | <0.001 | 0.55<br>(0.39,<br>0.71) | 0.27<br>(0.19,<br>0.35) | -2.36<br>(-2.77,<br>-1.95) | <0.001 |











| SDI category                 |   |   |   |   |                      |                      |                     |        |                         |                         |                      |        |                   |                   |                      |        |
|------------------------------|---|---|---|---|----------------------|----------------------|---------------------|--------|-------------------------|-------------------------|----------------------|--------|-------------------|-------------------|----------------------|--------|
| High                         | — | — | — | — | 55.16 (29.28, 95.64) | 48.36 (27.32, 81.54) | -0.40 (-0.83, 0.04) | 0.076  | 29.13 (24.74, 34.99)    | 36.93 (22.35, 42.74)    | 0.79 (0.50, 1.08)    | <0.001 | 0.47 (0.40, 0.56) | 0.63 (0.35, 0.72) | 1.02 (0.72, 1.33)    | <0.001 |
| High-middle                  | — | — | — | — | 14.71 (7.19, 26.98)  | 17.13 (8.49, 30.95)  | 0.48 (0.31, 0.65)   | <0.001 | 45.60 (36.62, 55.21)    | 22.13 (18.75, 26.57)    | -2.50 (-2.78, -2.23) | <0.001 | 0.86 (0.69, 1.03) | 0.40 (0.34, 0.48) | -2.65 (-2.94, -2.36) | <0.001 |
| Middle                       | — | — | — | — | 22.92 (10.84, 42.00) | 24.42 (11.85, 43.57) | 0.20 (0.11, 0.29)   | <0.001 | 116.98 (80.36, 147.46)  | 56.20 (40.79, 66.52)    | -2.56 (-2.89, -2.22) | <0.001 | 2.22 (1.50, 2.81) | 1.05 (0.76, 1.25) | -2.63 (-2.98, -2.28) | <0.001 |
| Low-middle                   | — | — | — | — | 9.80 (4.43, 18.86)   | 11.17 (5.10, 21.32)  | 0.46 (0.40, 0.52)   | <0.001 | 117.68 (58.84, 176.58)  | 79.74 (54.84, 105.16)   | -1.33 (-1.59, -1.08) | <0.001 | 2.26 (1.12, 3.40) | 1.52 (1.03, 2.01) | -1.35 (-1.61, -1.09) | <0.001 |
| Low                          | — | — | — | — | 13.68 (5.77, 26.74)  | 15.24 (6.47, 29.74)  | 0.37 (0.36, 0.38)   | <0.001 | 246.67 (114.97, 387.07) | 159.80 (93.24, 216.38)  | -1.48 (-1.59, -1.38) | <0.001 | 4.75 (2.20, 7.46) | 3.07 (1.77, 4.15) | -1.49 (-1.60, -1.39) | <0.001 |
| 21 GBD region                |   |   |   |   |                      |                      |                     |        |                         |                         |                      |        |                   |                   |                      |        |
| South Asia                   | — | — | — | — | 5.08 (2.22, 9.89)    | 5.24 (2.34, 10.05)   | 0.11 (0.09, 0.13)   | <0.001 | 80.10 (30.15, 138.08)   | 51.73 (30.76, 76.84)    | -1.62 (-2.11, -1.12) | <0.001 | 1.54 (0.58, 2.66) | 0.99 (0.59, 1.47) | -1.62 (-2.12, -1.12) | <0.001 |
| East Asia                    | — | — | — | — | 26.09 (12.69, 47.70) | 30.81 (15.03, 55.64) | 0.55 (0.46, 0.65)   | <0.001 | 95.20 (66.72, 124.90)   | 26.49 (17.80, 35.47)    | -4.36 (-4.66, -4.05) | <0.001 | 1.80 (1.25, 2.36) | 0.46 (0.30, 0.62) | -4.64 (-4.96, -4.32) | <0.001 |
| North Africa and Middle East | — | — | — | — | 39.75 (19.28, 72.68) | 40.81 (20.05, 74.27) | 0.09 (0.08, 0.10)   | <0.001 | 155.08 (71.30, 229.60)  | 90.91 (55.19, 124.13)   | -1.83 (-1.98, -1.69) | <0.001 | 2.93 (1.30, 4.35) | 1.69 (0.99, 2.33) | -1.89 (-2.04, -1.74) | <0.001 |
| Western Sub-Saharan Africa   | — | — | — | — | 20.19 (8.98, 37.99)  | 21.23 (9.15, 39.79)  | 0.17 (0.16, 0.19)   | <0.001 | 222.60 (131.68, 307.92) | 194.43 (104.32, 268.63) | -0.46 (-0.57, -0.34) | <0.001 | 4.27 (2.52, 5.93) | 3.72 (1.97, 5.16) | -0.46 (-0.57, -0.35) | <0.001 |
| Southeast Asia               | — | — | — | — | 22.82 (10.85, 41.39) | 23.88 (11.46, 42.99) | 0.15 (0.11, 0.19)   | <0.001 | 131.79 (69.64, 190.66)  | 89.15 (51.76, 114.63)   | -1.33 (-1.49, -1.17) | <0.001 | 2.51 (1.31, 3.66) | 1.68 (0.97, 2.18) | -1.35 (-1.52, -1.19) | <0.001 |
| Eastern Sub-Saharan          | — | — | — | — | 19.59 (8.13, 37.99)  | 20.36 (8.42, 39.79)  | 0.13 (0.12, 0.13)   | <0.001 | 394.25                  | 171.71 (95.93, 268.63)  | -2.82                | <0.001 | 7.59              | 3.29              | -2.84                | <0.001 |

|                             |   |   |   |   |                |                |             |        |               |                |         |        |        |        |              |        |
|-----------------------------|---|---|---|---|----------------|----------------|-------------|--------|---------------|----------------|---------|--------|--------|--------|--------------|--------|
| Africa                      |   |   |   |   | 38.31)         | 39.58)         | 0.14)       |        | (183.64,      | 242.39)        | (-2.92, |        | (3.52, | (1.81, | (-2.94,      |        |
|                             |   |   |   |   |                |                |             |        | 653.36)       |                | (-2.72) |        | 12.58) | 4.65)  | (-2.74)      |        |
| Central Latin America       | — | — | — | — | 6.02 (1.14,    | 8.13 (2.10,    | 1.04 (0.90, | <0.001 | 55.59 (36.16, | 25.78 (19.12,  | -2.62   |        | 1.07   | 0.48   | -2.68        |        |
|                             |   |   |   |   | 14.71)         | 18.07)         | 1.19)       |        | 63.00)        | 38.12)         | (-3.06, | <0.001 | (0.69, | (0.36, | (-3.14,      | <0.001 |
|                             |   |   |   |   |                |                |             |        |               |                | (-2.18) |        | 1.21)  | 0.73)  | (-2.23)      |        |
| Tropical Latin America      | — | — | — | — | 5.84 (0.36,    | 9.37 (2.17,    | 1.64 (1.58, | <0.001 | 125.05        | 59.24 (49.74,  | -2.50   |        | 2.41   | 1.13   | -2.54        |        |
|                             |   |   |   |   | 15.66)         | 21.10)         | 1.71)       |        | (80.82,       | 86.26)         | (-2.77, | <0.001 | (1.56, | (0.95, | (-2.81,      | <0.001 |
|                             |   |   |   |   |                |                |             |        | 138.14)       |                | (-2.24) |        | 2.66)  | 1.65)  | (-2.27)      |        |
| Central Sub-Saharan Africa  | — | — | — | — | 12.73 (4.75,   | 12.86 (4.75,   | 0.04 (0.03, | <0.001 | 278.29        | 193.27 (97.03, | -1.33   |        | 5.36   | 3.72   | -1.33        |        |
|                             |   |   |   |   | 26.87)         | 27.23)         | 0.04)       |        | (127.81,      | 309.77)        | (-1.41, | <0.001 | (2.45, | (1.86, | (-1.41,      | <0.001 |
|                             |   |   |   |   |                |                |             |        | 448.56)       |                | (-1.25) |        | 8.66)  | 5.98)  | (-1.25)      |        |
| Western Europe              | — | — | — | — | 5.98 (2.77,    | 4.30 (1.94,    | -1.14       | <0.001 | 8.48 (6.33,   | 5.46 (4.17,    | -1.49   |        | 0.15   | 0.10   | -1.52        |        |
|                             |   |   |   |   | 11.07)         | 8.16)          | (-1.24,     |        | 10.00)        | 6.53)          | (-1.64, | <0.001 | (0.11, | (0.07, | (-1.64,      | <0.001 |
|                             |   |   |   |   |                |                | (-1.03)     |        |               |                | (-1.33) |        | 0.18)  | 0.12)  | (-1.40)      |        |
| High-income North America   | — | — | — | — | 131.86 (71.30, | 117.43 (64.72, | -0.33       | 0.024  | 49.58 (41.47, | 82.24 (44.12,  | 1.72    |        | 0.74   | 1.40   | 2.18 (1.87,  | <0.001 |
|                             |   |   |   |   | 227.77)        | 198.64)        | (-0.62,     |        | 63.94)        | 95.32)         | (1.50,  | <0.001 | (0.67, | (0.67, | 2.49)        | <0.001 |
|                             |   |   |   |   |                |                | (-0.04)     |        |               |                | 1.94)   |        | 1.01)  | 1.58)  |              |        |
| Central Asia                | — | — | — | — | 7.75 (2.93,    | 8.07 (2.93,    | 0.14 (0.08, | <0.001 | 49.57 (36.13, | 42.94 (32.45,  | -0.42   |        | 0.95   | 0.82   | -0.44        |        |
|                             |   |   |   |   | 15.70)         | 16.51)         | 0.20)       |        | 59.10)        | 55.16)         | (-1.02, | 0.167  | (0.68, | (0.61, | (-1.04,      | 0.157  |
|                             |   |   |   |   |                |                |             |        |               |                | 0.18)   |        | 1.13)  | 1.05)  | 0.17)        |        |
| Eastern Europe              | — | — | — | — | 1.04 (0.38,    | 1.10 (0.42,    | 0.21 (0.14, | <0.001 | 13.69 (8.43,  | 17.34 (12.47,  | 0.74    |        | 0.26   | 0.33   | 0.74 (-0.44, | 0.220  |
|                             |   |   |   |   | 2.13)          | 2.24)          | 0.28)       |        | 15.90)        | 22.72)         | (-0.43, | 0.215  | (0.16, | (0.24, | 1.94)        |        |
|                             |   |   |   |   |                |                |             |        |               |                | 1.93)   |        | 0.31)  | 0.44)  |              |        |
| Southern Sub-Saharan Africa | — | — | — | — | 10.49 (4.40,   | 9.42 (3.88,    | -0.36       | <0.001 | 342.97        | 131.69 (87.87, | -3.09   |        | 6.60   | 2.53   | -3.10        |        |
|                             |   |   |   |   | 21.23)         | 19.74)         | (-0.44,     |        | (243.74,      | 192.55)        | (-4.71, | <0.001 | (4.69, | (1.68, | (-4.73,      | <0.001 |
|                             |   |   |   |   |                |                | (-0.29)     |        | 429.35)       |                | (-1.44) |        | 8.27)  | 3.70)  | (-1.44)      |        |
| High-income Asia Pacific    | — | — | — | — | 17.06 (7.57,   | 13.77 (6.91,   | -0.74       | <0.001 | 23.96 (15.16, | 5.67 (4.37,    | -4.91   |        | 0.43   | 0.09   | -5.54        |        |
|                             |   |   |   |   | 31.25)         | 24.44)         | (-0.87,     |        | 29.20)        | 8.95)          | (-5.18, | <0.001 | (0.27, | (0.07, | (-5.89,      | <0.001 |
|                             |   |   |   |   |                |                | (-0.62)     |        |               |                | (-4.63) |        | 0.53)  | 0.15)  | (-5.18)      |        |
| Central Europe              | — | — | — | — | 7.00 (2.56,    | 5.89 (2.54,    | -0.59       | <0.001 | 31.08 (25.73, | 22.69 (15.42,  | -1.10   |        | 0.59   | 0.43   | -1.11        |        |
|                             |   |   |   |   | 14.27)         | 11.22)         | (-0.63,     |        | 36.58)        | 29.24)         | (-1.31, | <0.001 | (0.49, | (0.29, | (-1.32,      | <0.001 |
|                             |   |   |   |   |                |                | (-0.55)     |        |               |                | (-0.89) |        | 0.69)  | 0.56)  | (-0.89)      |        |
| Andean Latin America        | — | — | — | — | 1.84 (0.00,    | 9.15 (1.15,    | 5.67 (5.40, | <0.001 | 85.02 (60.48, | 40.18 (26.59,  | -2.54   | <0.001 | 1.64   | 0.76   | -2.61        | <0.001 |

|                        |   |   |   |   |               |               |             |        |               |                |         |        |        |              |             |        |
|------------------------|---|---|---|---|---------------|---------------|-------------|--------|---------------|----------------|---------|--------|--------|--------------|-------------|--------|
| America                |   |   |   |   | 9.34)         | 19.94)        | 5.95)       |        | 115.03)       | 57.28)         | (-3.22, | (1.16, | (0.50, | (-3.28,      |             |        |
|                        |   |   |   |   |               |               |             |        |               |                | -1.87)  | 2.22)  | 1.09)  | -1.93)       |             |        |
|                        |   |   |   |   |               |               |             |        |               |                | 0.05)   | 2.85)  | 2.87)  | 0.06 (-0.21, | 0.680)      |        |
| Caribbean              | — | — | — | — | 17.49 (7.75,  | 16.98 (7.43,  | (-0.16,     | <0.001 | (92.03,       | 150.08 (90.15, | (-0.21, | 0.689  | (1.75, | (1.73,       | 0.32)       |        |
|                        |   |   |   |   | 32.78)        | 31.68)        | (-0.07)     |        | 235.42)       | 248.26)        | 0.31)   |        | 4.52)  | 4.78)        |             |        |
|                        |   |   |   |   |               |               |             |        |               |                | -2.09)  | 0.67)  | 0.36)  | -2.10)       |             |        |
| Southern Latin America | — | — | — | — | 1.87 (0.12,   | 6.78 (1.26,   | 4.52 (4.21, | <0.001 | 34.80 (23.69, | 19.05 (13.91,  | (-2.49, | <0.001 | (0.45, | (0.26,       | (-2.42,     | <0.001 |
|                        |   |   |   |   | 8.02)         | 17.33)        | 4.83)       |        | 44.57)        | 27.66)         | -1.69)  |        | 0.86)  | 0.52)        | -1.78)      |        |
|                        |   |   |   |   |               |               |             |        |               |                | -0.23)  | 4.11)  | 3.87)  | -0.23)       |             |        |
| Oceania                | — | — | — | — | 19.47 (8.49,  | 17.75 (7.88,  | (-0.37,     | <0.001 | (107.42,      | 201.53 (91.39, | (-0.34, | <0.001 | (2.05, | (1.73,       | (-0.34,     | <0.001 |
|                        |   |   |   |   | 36.71)        | 33.99)        | (-0.29)     |        | 373.49)       | 381.18)        | -0.11)  |        | 7.20)  | 7.34)        | -0.11)      |        |
|                        |   |   |   |   |               |               |             |        |               |                | -1.46)  | 0.14)  | 0.09)  | -1.47)       |             |        |
| Australasia            | — | — | — | — | 7.24 (3.48,   | 4.91 (2.29,   | (-1.35,     | <0.001 | 7.95 (5.70,   | 5.23 (3.69,    | (-1.82, | <0.001 | (0.10, | (0.06,       | (-1.86,     | <0.001 |
|                        |   |   |   |   | 13.42)        | 9.03)         | (-1.28)     |        | 10.12)        | 7.08)          | -1.10)  |        | 0.18)  | 0.13)        | -1.08)      |        |
| <b>Men</b>             |   |   |   |   |               |               |             |        |               |                |         |        |        |              |             |        |
|                        |   |   |   |   |               |               |             |        |               |                |         |        |        |              |             |        |
| Global                 | — | — | — | — | 30.07 (15.30, | 28.82 (15.10, | (-0.21,     | 0.006  | (73.69,       | 80.92 (56.07,  | (-0.94, | <0.001 | (1.36, | (1.05,       | (-0.96,     | <0.001 |
|                        |   |   |   |   | 52.77)        | 50.20)        | (-0.04)     |        | 116.20)       | 92.39)         | -0.46)  |        | 2.19)  | 1.73)        | -0.50)      |        |
| <b>SDI category</b>    |   |   |   |   |               |               |             |        |               |                |         |        |        |              |             |        |
|                        |   |   |   |   |               |               |             |        |               |                |         |        |        |              |             |        |
| High                   | — | — | — | — | 70.06 (38.10, | 64.88 (36.83, | (-0.22,     | 0.104  | 57.95 (49.99, | 77.44 (45.60,  | 1.01)   | <0.001 | 1.00)  | 1.39)        | 1.12 (0.87, | <0.001 |
|                        |   |   |   |   | 119.09)       | 109.11)       | (-0.49,     |        | 67.29)        | 95.20)         | (0.72,  |        | (0.86, | (0.78,       | 1.38)       |        |
|                        |   |   |   |   |               |               | 0.05)       |        |               |                | 1.30)   |        | 1.17)  | 1.73)        |             |        |
|                        |   |   |   |   |               |               |             |        |               |                | -1.69)  |        | 1.41)  | 0.84)        | -1.76)      |        |
| High-middle            | — | — | — | — | 18.07 (8.98,  | 20.44 (10.34, | 0.37 (0.17, | <0.001 | 74.40 (60.04, | 45.48 (37.96,  | (-2.01, | <0.001 | (1.13, | (0.71,       | (-2.07,     | <0.001 |
|                        |   |   |   |   | 33.39)        | 37.28)        | 0.57)       |        | 88.81)        | 52.79)         | -1.38)  |        | 1.69)  | 0.98)        | -1.44)      |        |
|                        |   |   |   |   |               |               |             |        |               |                | -1.38)  |        | 2.50)  | 1.65)        | -1.42)      |        |
| Middle                 | — | — | — | — | 29.70 (14.52, | 31.53 (15.70, | 0.19 (0.07, | 0.001  | (86.46,       | 88.15 (54.79,  | (-1.62, | <0.001 | (1.62, | (1.01,       | (-1.68,     | <0.001 |
|                        |   |   |   |   | 53.08)        | 56.60)        | 0.30)       |        | 159.04)       | 102.58)        | -1.14)  |        | 3.02)  | 1.93)        | -1.17)      |        |
|                        |   |   |   |   |               |               |             |        |               |                | -0.68)  |        | 1.88)  | 1.52)        | -0.70)      |        |
| Low-middle             | — | — | — | — | 13.00 (6.22,  | 14.24 (6.80,  | 0.31 (0.26, | <0.001 | 98.24 (69.78, | 79.95 (61.77,  | (-0.91, | <0.001 | (1.34, | (1.18,       | (-0.93,     | <0.001 |
|                        |   |   |   |   | 24.00)        | 26.22)        | 0.36)       |        | 125.39)       | 99.18)         | -0.46)  |        | 2.40)  | 1.89)        | -0.47)      |        |
|                        |   |   |   |   |               |               |             |        |               |                | -0.53)  |        | 2.93)  | 2.51)        | -0.54)      |        |
| Low                    | — | — | — | — | 18.28 (8.08,  | 20.86 (9.38,  | 0.46 (0.43, | <0.001 | 153.26)       | 131.82 (81.43, | (-0.65, | <0.001 | (1.77, | (1.53,       | (-0.66,     | <0.001 |
|                        |   |   |   |   | 34.68)        | 39.86)        | 0.50)       |        | (92.24,       | 189.03)        |         |        | (1.77, | (1.53,       | (-0.66,     |        |

|                                 |   |   |   |   | 209.59)                          |                         |                            |        |                                 | -0.41)                    |                            | 4.03)  | 3.62)                   | -0.42)                  |                            |        |
|---------------------------------|---|---|---|---|----------------------------------|-------------------------|----------------------------|--------|---------------------------------|---------------------------|----------------------------|--------|-------------------------|-------------------------|----------------------------|--------|
| <b>21 GBD region</b>            |   |   |   |   |                                  |                         |                            |        |                                 |                           |                            |        |                         |                         |                            |        |
| South Asia                      | — | — | — | — | 5.68 (2.52,<br>10.89)            | 5.85 (2.60,<br>11.26)   | 0.10 (0.09,<br>0.12)       | <0.001 | 62.96 (43.85,<br>91.82)         | 53.96 (37.36,<br>74.29)   | -0.42<br>(-1.09,<br>0.26)  | 0.226  | 1.21<br>(0.84,<br>1.77) | 1.03<br>(0.71,<br>1.42) | -0.42<br>(-1.10,<br>0.26)  | 0.226  |
| East Asia                       | — | — | — | — | 32.81 (16.01,<br>58.82)          | 38.37 (19.35,<br>68.97) | 0.53 (0.38,<br>0.68)       | <0.001 | 135.70<br>(84.64,<br>170.57)    | 64.86 (36.53,<br>81.94)   | -2.48<br>(-3.00,<br>-1.96) | <0.001 | 2.57<br>(1.60,<br>3.25) | 1.19<br>(0.64,<br>1.51) | -2.59<br>(-3.14,<br>-2.03) | <0.001 |
| North Africa and<br>Middle East | — | — | — | — | 48.24 (24.14,<br>87.82)          | 48.62 (24.47,<br>86.76) | 0.02 (-0.02,<br>0.06)      | 0.347  | 132.95<br>(69.76,<br>227.02)    | 104.31 (62.03,<br>165.25) | -0.84<br>(-0.97,<br>-0.71) | <0.001 | 2.49<br>(1.27,<br>4.31) | 1.93<br>(1.12,<br>3.13) | -0.87<br>(-0.97,<br>-0.77) | <0.001 |
| Western<br>Sub-Saharan Africa   | — | — | — | — | 26.86 (11.98,<br>49.39)          | 27.44 (12.21,<br>51.12) | 0.10 (0.01,<br>0.18)       | 0.023  | 97.13 (64.38,<br>139.37)        | 121.80 (63.10,<br>172.86) | 0.80<br>(0.56,<br>1.04)    | <0.001 | 1.83<br>(1.20,<br>2.64) | 2.31<br>(1.16,<br>3.30) | 0.81 (0.57,<br>1.06)       | <0.001 |
| Southeast Asia                  | — | — | — | — | 34.09 (16.66,<br>62.21)          | 36.23 (17.88,<br>65.13) | 0.21 (0.19,<br>0.23)       | <0.001 | 126.82<br>(75.86,<br>165.58)    | 126.29 (60.40,<br>158.57) | -0.00<br>(-0.20,<br>0.20)  | 0.985  | 2.40<br>(1.42,<br>3.17) | 2.38<br>(1.11,<br>3.01) | -0.01<br>(-0.21,<br>0.19)  | 0.942  |
| Eastern Sub-Saharan<br>Africa   | — | — | — | — | 29.34 (12.77,<br>54.91)          | 31.09 (13.73,<br>57.72) | 0.20 (0.18,<br>0.21)       | <0.001 | 263.82<br>(138.36,<br>383.64)   | 166.45 (95.43,<br>287.39) | -1.58<br>(-1.69,<br>-1.47) | <0.001 | 5.05<br>(2.64,<br>7.37) | 3.17<br>(1.81,<br>5.53) | -1.60<br>(-1.72,<br>-1.49) | <0.001 |
| Central Latin<br>America        | — | — | — | — | 1.50 (0.00,<br>4.79)             | 2.71 (0.49,<br>7.21)    | 2.04 (1.94,<br>2.14)       | <0.001 | 46.72 (36.25,<br>54.18)         | 30.75 (23.65,<br>43.20)   | -1.41<br>(-1.65,<br>-1.18) | <0.001 | 0.90<br>(0.70,<br>1.04) | 0.59<br>(0.45,<br>0.83) | -1.43<br>(-1.67,<br>-1.19) | <0.001 |
| Tropical Latin<br>America       | — | — | — | — | 0.56 (0.00,<br>3.40)             | 2.60 (0.00,<br>8.43)    | 5.38 (5.03,<br>5.72)       | <0.001 | 139.14<br>(91.90,<br>156.61)    | 68.51 (58.80,<br>102.48)  | -2.40<br>(-2.64,<br>-2.17) | <0.001 | 2.69<br>(1.78,<br>3.03) | 1.32<br>(1.13,<br>1.97) | -2.41<br>(-2.65,<br>-2.18) | <0.001 |
| Central Sub-Saharan<br>Africa   | — | — | — | — | 16.01 (6.39,<br>34.18)           | 15.86 (6.28,<br>34.17)  | -0.03<br>(-0.04,<br>-0.02) | <0.001 | 206.01<br>(89.06,<br>340.44)    | 158.71 (84.80,<br>276.77) | -0.93<br>(-1.08,<br>-0.79) | <0.001 | 3.96<br>(1.70,<br>6.56) | 3.04<br>(1.62,<br>5.33) | -0.94<br>(-1.08,<br>-0.79) | <0.001 |
| Western Europe                  | — | — | — | — | 8.92 (4.55,<br>15.77)            | 7.20 (3.56,<br>12.73)   | -0.74<br>(-0.78,<br>-0.70) | <0.001 | 21.38 (14.85,<br>24.98)         | 13.77 (10.63,<br>17.09)   | -1.52<br>(-1.86,<br>-1.19) | <0.001 | 0.40<br>(0.27,<br>0.47) | 0.25<br>(0.19,<br>0.31) | -1.56<br>(-1.91,<br>-1.21) | <0.001 |
| High-income North               | — | — | — | — | 168.10 (91.80,<br>163.15 (90.33, |                         | -0.04                      | 0.799  | 99.89 (87.92,<br>177.05 (88.81, |                           | 2.00                       | <0.001 | 1.65                    | 3.15                    | 2.29 (1.89,                | <0.001 |

|                             |   |   |   |   |                      |                      |                      |        |                         |                         |                      |              |                   |                    |                      |        |
|-----------------------------|---|---|---|---|----------------------|----------------------|----------------------|--------|-------------------------|-------------------------|----------------------|--------------|-------------------|--------------------|----------------------|--------|
| America                     |   |   |   |   | 287.59)              | 274.58)              | (-0.34, 0.26)        |        | 132.12)                 | 206.03)                 | (1.71, 2.29)         | (1.49, 2.24) | (1.44, 3.63)      | 2.69)              |                      |        |
| Central Asia                | — | — | — | — | 19.98 (8.69, 37.58)  | 22.92 (9.76, 42.91)  | 0.48 (0.42, 0.54)    | <0.001 | 100.90 (70.24, 131.39)  | 94.55 (71.62, 122.22)   | -0.17 (-0.55, 0.20)  | 0.357        | 1.92 (1.33, 2.50) | 1.79 (1.35, 2.31)  | -0.19 (-0.57, 0.19)  | 0.327  |
| Eastern Europe              | — | — | — | — | 2.25 (0.98, 4.37)    | 2.23 (0.96, 4.36)    | (-0.06, -0.02)       | 0.001  | 48.32 (30.81, 57.85)    | 57.98 (44.20, 75.41)    | 0.65 (-0.68, 1.99)   | 0.342        | 0.93 (0.59, 1.12) | 1.12 (0.85, 1.46)  | 0.65 (-0.68, 2.00)   | 0.341  |
| Southern Sub-Saharan Africa | — | — | — | — | 11.85 (4.91, 24.04)  | 11.09 (4.56, 22.82)  | (-0.28, -0.18)       | <0.001 | 252.11 (196.63, 318.60) | 158.35 (116.71, 212.15) | -1.58 (-2.46, -0.69) | <0.001       | 4.85 (3.77, 6.14) | 3.04 (2.24, 4.09)  | -1.59 (-2.47, -0.70) | 0.001  |
| High-income Asia Pacific    | — | — | — | — | 27.67 (14.16, 48.73) | 26.09 (13.90, 44.24) | (-0.26, -0.14)       | <0.001 | 45.42 (26.76, 56.24)    | 15.12 (11.48, 25.67)    | -3.71 (-3.89, -3.52) | <0.001       | 0.83 (0.47, 1.03) | 0.25 (0.18, 0.46)  | -4.08 (-4.29, -3.87) | <0.001 |
| Central Europe              | — | — | — | — | 13.12 (6.05, 24.95)  | 11.73 (5.92, 21.01)  | (-0.40, -0.36)       | <0.001 | 63.79 (54.99, 76.30)    | 61.65 (39.27, 77.15)    | -0.15 (-0.60, 0.31)  | 0.528        | 1.21 (1.05, 1.47) | 1.17 (0.74, 1.47)  | -0.14 (-0.60, 0.32)  | 0.549  |
| Andean Latin America        | — | — | — | — | 0.15 (0.00, 2.10)    | 4.00 (0.00, 13.55)   | 11.88 (11.32, 12.44) | <0.001 | 66.55 (47.53, 89.75)    | 50.39 (33.34, 72.49)    | -0.92 (-1.27, -0.57) | <0.001       | 1.29 (0.92, 1.74) | 0.97 (0.64, 1.39)  | -0.95 (-1.30, -0.59) | <0.001 |
| Caribbean                   | — | — | — | — | 17.23 (7.48, 31.82)  | 17.39 (7.67, 32.40)  | 0.04 (-0.01, 0.08)   | 0.137  | 120.68 (91.86, 166.32)  | 138.14 (96.40, 205.23)  | 0.47 (0.19, 0.76)    | 0.001        | 2.30 (1.74, 3.20) | 2.64 (1.84, 3.93)  | 0.48 (0.19, 0.77)    | 0.001  |
| Southern Latin America      | — | — | — | — | 0.48 (0.00, 1.58)    | 4.83 (0.28, 15.82)   | 8.29 (7.60, 8.98)    | <0.001 | 53.06 (38.81, 68.14)    | 34.92 (25.54, 49.02)    | -1.40 (-1.82, -0.98) | <0.001       | 1.03 (0.75, 1.32) | 0.67 (0.49, 0.94)  | -1.45 (-1.86, -1.03) | <0.001 |
| Oceania                     | — | — | — | — | 26.76 (12.77, 47.96) | 26.97 (12.77, 48.64) | 0.02 (0.01, 0.04)    | <0.001 | 293.64 (154.93, 496.97) | 298.68 (146.48, 520.93) | 0.04 (-0.06, 0.13)   | 0.448        | 5.64 (2.97, 9.58) | 5.73 (2.77, 10.06) | 0.04 (-0.06, 0.13)   | 0.453  |
| Australasia                 | — | — | — | — | 8.70 (4.36, 15.55)   | 6.38 (3.12, 11.47)   | (-1.06, -1.02)       | <0.001 | 13.47 (9.66, 17.90)     | 10.57 (7.15, 15.13)     | -0.77 (-1.16, -0.37) | <0.001       | 0.24 (0.17, 0.33) | 0.19 (0.13, 0.28)  | -0.74 (-1.16, -0.32) | 0.001  |
| <b>Non-rheumatic</b>        |   |   |   |   |                      |                      |                      |        |                         |                         |                      |              |                   |                    |                      |        |

| valvular heart disease       |                   |                   |                      |        |                     |                     |                      |        |                      |                      |                      |        |                   |                   |                      |        |
|------------------------------|-------------------|-------------------|----------------------|--------|---------------------|---------------------|----------------------|--------|----------------------|----------------------|----------------------|--------|-------------------|-------------------|----------------------|--------|
| 15-19 years                  |                   |                   |                      |        |                     |                     |                      |        |                      |                      |                      |        |                   |                   |                      |        |
| Women                        |                   |                   |                      |        |                     |                     |                      |        |                      |                      |                      |        |                   |                   |                      |        |
| Global                       | 1.45 (1.35, 1.57) | 1.19 (1.11, 1.28) | -0.70 (-0.74, -0.65) | <0.001 | 1.41 (1.19, 1.65)   | 1.15 (0.97, 1.34)   | -0.70 (-0.85, -0.56) | <0.001 | 8.00 (4.88, 11.63)   | 7.12 (4.98, 9.51)    | -0.38 (-0.48, -0.29) | <0.001 | 0.11 (0.07, 0.16) | 0.10 (0.07, 0.13) | -0.38 (-0.48, -0.29) | <0.001 |
| SDI category                 |                   |                   |                      |        |                     |                     |                      |        |                      |                      |                      |        |                   |                   |                      |        |
| High                         | 7.54 (7.08, 8.02) | 8.43 (7.96, 8.94) | 0.36 (0.22, 0.49)    | <0.001 | 10.55 (8.81, 12.54) | 11.45 (9.44, 13.40) | 0.25 (0.02, 0.47)    | 0.030  | 4.33 (3.92, 4.78)    | 2.99 (2.55, 3.47)    | -1.14 (-1.46, -0.81) | <0.001 | 0.06 (0.05, 0.07) | 0.04 (0.04, 0.05) | -1.14 (-1.46, -0.81) | <0.001 |
| High-middle                  | 1.89 (1.73, 2.07) | 1.75 (1.59, 1.92) | -0.26 (-0.32, -0.20) | <0.001 | 0.88 (0.62, 1.19)   | 0.71 (0.51, 0.93)   | -0.73 (-1.14, -0.33) | <0.001 | 5.37 (4.16, 6.52)    | 3.95 (3.45, 4.52)    | -1.06 (-1.35, -0.76) | <0.001 | 0.08 (0.06, 0.09) | 0.06 (0.05, 0.06) | -1.06 (-1.35, -0.76) | <0.001 |
| Middle                       | 0.40 (0.35, 0.46) | 0.37 (0.31, 0.43) | -0.31 (-0.36, -0.26) | <0.001 | —                   | —                   | —                    | —      | 8.16 (5.45, 11.09)   | 6.15 (4.90, 7.57)    | -0.98 (-1.19, -0.78) | <0.001 | 0.11 (0.08, 0.16) | 0.09 (0.07, 0.11) | -0.99 (-1.19, -0.78) | <0.001 |
| Low-middle                   | 0.20 (0.16, 0.23) | 0.18 (0.15, 0.22) | -0.31 (-0.44, -0.18) | <0.001 | —                   | —                   | —                    | —      | 9.34 (4.08, 16.59)   | 7.98 (4.89, 11.77)   | -0.57 (-0.71, -0.42) | <0.001 | 0.13 (0.06, 0.23) | 0.11 (0.07, 0.16) | -0.57 (-0.71, -0.42) | <0.001 |
| Low                          | 0.12 (0.09, 0.16) | 0.13 (0.10, 0.16) | 0.09 (0.05, 0.14)    | <0.001 | —                   | —                   | —                    | —      | 13.61 (5.57, 25.25)  | 11.25 (6.15, 17.69)  | -0.64 (-0.77, -0.52) | <0.001 | 0.19 (0.08, 0.35) | 0.16 (0.09, 0.25) | -0.65 (-0.77, -0.52) | <0.001 |
| 21 GBD region                |                   |                   |                      |        |                     |                     |                      |        |                      |                      |                      |        |                   |                   |                      |        |
| South Asia                   | 0.08 (0.07, 0.10) | 0.11 (0.09, 0.13) | 0.74 (0.59, 0.88)    | <0.001 | —                   | —                   | —                    | —      | 8.14 (2.26, 16.37)   | 5.99 (2.88, 9.76)    | -1.08 (-1.42, -0.74) | <0.001 | 0.11 (0.03, 0.23) | 0.08 (0.04, 0.14) | -1.08 (-1.42, -0.75) | <0.001 |
| East Asia                    | 0.74 (0.67, 0.81) | 0.83 (0.76, 0.91) | 0.41 (0.27, 0.55)    | <0.001 | 0.08 (0.00, 0.18)   | 0.13 (0.00, 0.30)   | 1.84 (1.15, 2.53)    | <0.001 | 3.36 (1.96, 4.76)    | 1.45 (1.17, 1.75)    | -2.96 (-3.07, -2.84) | <0.001 | 0.05 (0.03, 0.07) | 0.02 (0.02, 0.02) | -2.96 (-3.08, -2.85) | <0.001 |
| North Africa and Middle East | 0.51 (0.38, 0.66) | 0.52 (0.39, 0.68) | 0.09 (0.03, 0.14)    | 0.002  | —                   | —                   | —                    | —      | 24.55 (14.79, 35.47) | 15.44 (11.19, 21.09) | -1.54 (-1.84, -1.24) | <0.001 | 0.34 (0.21, 0.50) | 0.22 (0.16, 0.29) | -1.54 (-1.84, -1.24) | <0.001 |



|                             |                      |                      |                      |        |                      |                      |                      |        |                      |                      |                      |        |                   |                   |                      |        |
|-----------------------------|----------------------|----------------------|----------------------|--------|----------------------|----------------------|----------------------|--------|----------------------|----------------------|----------------------|--------|-------------------|-------------------|----------------------|--------|
| Western Sub-Saharan Africa  | 0.12 (0.10, 0.15)    | 0.13 (0.10, 0.16)    | 0.22 (0.14, 0.31)    | <0.001 | —                    | —                    | —                    | —      | 22.29 (8.85, 43.14)  | 20.60 (11.19, 33.23) | -0.28 (-0.39, -0.17) | <0.001 | 0.31 (0.12, 0.60) | 0.29 (0.16, 0.46) | -0.28 (-0.39, -0.17) | <0.001 |
| Southeast Asia              | 0.23 (0.18, 0.29)    | 0.27 (0.22, 0.34)    | 0.53 (0.50, 0.56)    | <0.001 | —                    | —                    | —                    | —      | 2.87 (1.56, 4.57)    | 2.16 (1.70, 2.65)    | -0.95 (-1.05, -0.84) | <0.001 | 0.04 (0.02, 0.06) | 0.03 (0.02, 0.04) | -0.95 (-1.06, -0.84) | <0.001 |
| Eastern Sub-Saharan Africa  | 0.12 (0.09, 0.15)    | 0.11 (0.08, 0.14)    | -0.33 (-0.49, -0.17) | <0.001 | —                    | —                    | —                    | —      | 14.40 (6.48, 25.78)  | 8.23 (5.02, 12.29)   | -1.91 (-2.12, -1.71) | <0.001 | 0.20 (0.09, 0.36) | 0.11 (0.07, 0.17) | -1.92 (-2.12, -1.72) | <0.001 |
| Central Latin America       | 0.18 (0.15, 0.22)    | 0.23 (0.18, 0.28)    | 0.79 (0.73, 0.85)    | <0.001 | —                    | —                    | —                    | —      | 6.61 (5.73, 7.52)    | 5.48 (4.42, 6.75)    | -0.58 (-1.31, 0.16)  | 0.124  | 0.09 (0.08, 0.11) | 0.08 (0.06, 0.09) | -0.58 (-1.31, 0.16)  | 0.125  |
| Tropical Latin America      | 0.40 (0.35, 0.44)    | 0.38 (0.33, 0.42)    | -0.25 (-0.46, -0.03) | 0.026  | —                    | —                    | —                    | —      | 16.13 (14.51, 17.86) | 8.37 (7.43, 9.39)    | -2.19 (-2.67, -1.71) | <0.001 | 0.23 (0.20, 0.25) | 0.12 (0.10, 0.13) | -2.19 (-2.67, -1.71) | <0.001 |
| Central Sub-Saharan Africa  | 0.12 (0.08, 0.17)    | 0.11 (0.07, 0.16)    | -0.35 (-0.45, -0.24) | <0.001 | —                    | —                    | —                    | —      | 11.01 (4.38, 23.30)  | 7.47 (3.76, 14.24)   | -1.33 (-1.63, -1.03) | <0.001 | 0.15 (0.06, 0.33) | 0.10 (0.05, 0.20) | -1.33 (-1.63, -1.03) | <0.001 |
| Western Europe              | 2.46 (2.31, 2.63)    | 2.31 (2.14, 2.49)    | -0.19 (-0.36, -0.02) | 0.027  | 3.14 (2.15, 4.25)    | 2.34 (1.62, 3.05)    | -1.00 (-1.52, -0.47) | <0.001 | 4.57 (4.11, 5.03)    | 3.13 (2.69, 3.58)    | -1.35 (-1.83, -0.86) | <0.001 | 0.06 (0.06, 0.07) | 0.04 (0.04, 0.05) | -1.39 (-1.86, -0.92) | <0.001 |
| High-income North America   | 14.79 (13.86, 15.67) | 15.14 (14.33, 15.91) | 0.05 (-0.09, 0.19)   | 0.507  | 23.27 (18.53, 28.32) | 23.01 (18.60, 27.47) | -0.10 (-0.35, 0.16)  | 0.454  | 4.07 (3.68, 4.42)    | 2.58 (2.31, 2.88)    | -1.49 (-2.33, -0.64) | 0.001  | 0.06 (0.05, 0.06) | 0.04 (0.03, 0.04) | -1.50 (-2.34, -0.65) | 0.001  |
| Central Asia                | 1.60 (1.16, 2.11)    | 1.77 (1.30, 2.31)    | 0.34 (0.32, 0.36)    | <0.001 | —                    | —                    | —                    | —      | 4.16 (3.50, 4.85)    | 6.47 (5.03, 8.35)    | 1.66 (0.86, 2.45)    | <0.001 | 0.06 (0.05, 0.07) | 0.09 (0.07, 0.12) | 1.66 (0.87, 2.45)    | <0.001 |
| Eastern Europe              | 3.56 (3.22, 3.94)    | 3.80 (3.45, 4.16)    | 0.22 (0.20, 0.24)    | <0.001 | —                    | —                    | —                    | —      | 2.55 (2.29, 2.80)    | 4.47 (3.79, 5.59)    | 2.21 (1.22, 3.22)    | <0.001 | 0.04 (0.03, 0.04) | 0.06 (0.05, 0.08) | 2.22 (1.22, 3.23)    | <0.001 |
| Southern Sub-Saharan Africa | 0.22 (0.19, 0.25)    | 0.19 (0.16, 0.22)    | -0.54 (-0.60, -0.48) | <0.001 | —                    | —                    | —                    | —      | 16.59 (12.44, 20.93) | 8.04 (5.27, 11.77)   | -2.59 (-3.26, -1.91) | <0.001 | 0.23 (0.17, 0.29) | 0.11 (0.07, 0.16) | -2.60 (-3.27, -1.91) | <0.001 |

|                          |                    |                    |                      |        |                     |                     |                      |        |                     |                     |                      |        |                   |                   |                      |        |
|--------------------------|--------------------|--------------------|----------------------|--------|---------------------|---------------------|----------------------|--------|---------------------|---------------------|----------------------|--------|-------------------|-------------------|----------------------|--------|
| High-income Asia Pacific | 9.29 (8.64, 10.01) | 9.82 (9.13, 10.59) | 0.19 (0.15, 0.23)    | <0.001 | 11.59 (8.63, 14.89) | 11.46 (8.79, 14.45) | -0.02 (-0.14, 0.10)  | 0.718  | 3.68 (3.16, 4.26)   | 1.88 (1.42, 2.33)   | -2.30 (-3.29, -1.30) | <0.001 | 0.05 (0.04, 0.06) | 0.03 (0.02, 0.03) | -2.31 (-3.31, -1.31) | <0.001 |
| Central Europe           | 3.16 (2.59, 3.77)  | 4.31 (3.62, 5.03)  | 1.09 (1.05, 1.13)    | <0.001 | —                   | —                   | —                    | —      | 3.83 (3.22, 4.46)   | 4.27 (3.50, 5.05)   | 0.44 (-0.04, 0.92)   | 0.070  | 0.05 (0.04, 0.06) | 0.06 (0.05, 0.07) | 0.44 (-0.03, 0.92)   | 0.068  |
| Andean Latin America     | 0.17 (0.12, 0.22)  | 0.23 (0.17, 0.30)  | 1.11 (1.02, 1.19)    | <0.001 | —                   | —                   | —                    | —      | 10.99 (6.86, 16.05) | 6.66 (4.38, 9.63)   | -1.80 (-2.33, -1.26) | <0.001 | 0.15 (0.10, 0.22) | 0.09 (0.06, 0.13) | -1.80 (-2.34, -1.26) | <0.001 |
| Caribbean                | 0.24 (0.17, 0.30)  | 0.26 (0.20, 0.33)  | 0.36 (0.30, 0.43)    | <0.001 | —                   | —                   | —                    | —      | 16.42 (9.96, 26.09) | 15.73 (8.69, 28.70) | 0.02 (-0.37, 0.42)   | 0.900  | 0.23 (0.14, 0.37) | 0.22 (0.12, 0.40) | 0.03 (-0.37, 0.42)   | 0.897  |
| Southern Latin America   | 0.62 (0.45, 0.84)  | 0.83 (0.62, 1.09)  | 0.97 (0.92, 1.01)    | <0.001 | —                   | —                   | —                    | —      | 5.71 (4.28, 7.44)   | 3.93 (3.07, 4.94)   | -1.30 (-1.76, -0.84) | <0.001 | 0.08 (0.06, 0.10) | 0.05 (0.04, 0.07) | -1.30 (-1.76, -0.84) | <0.001 |
| Oceania                  | 0.55 (0.41, 0.73)  | 0.56 (0.40, 0.73)  | -0.01 (-0.17, 0.15)  | 0.899  | —                   | —                   | —                    | —      | 9.08 (4.30, 17.73)  | 11.49 (5.72, 21.31) | 0.74 (-0.11, 1.61)   | 0.088  | 0.13 (0.06, 0.25) | 0.16 (0.08, 0.30) | 0.74 (-0.11, 1.60)   | 0.088  |
| Australasia              | 1.00 (0.83, 1.21)  | 2.13 (1.72, 2.62)  | 2.65 (2.61, 2.69)    | <0.001 | —                   | —                   | —                    | —      | 2.72 (2.15, 3.46)   | 1.45 (1.06, 1.94)   | -2.01 (-3.53, -0.46) | 0.011  | 0.04 (0.03, 0.05) | 0.02 (0.01, 0.03) | -2.01 (-3.53, -0.46) | 0.011  |
| <b>Men</b>               |                    |                    |                      |        |                     |                     |                      |        |                     |                     |                      |        |                   |                   |                      |        |
| Global                   | 1.13 (1.03, 1.24)  | 1.01 (0.92, 1.12)  | -0.37 (-0.39, -0.34) | <0.001 | 0.82 (0.65, 1.01)   | 0.63 (0.47, 0.78)   | -0.88 (-1.07, -0.70) | <0.001 | 7.34 (5.85, 9.11)   | 6.24 (5.16, 7.59)   | -0.57 (-0.73, -0.40) | <0.001 | 0.10 (0.08, 0.13) | 0.09 (0.07, 0.11) | -0.57 (-0.73, -0.40) | <0.001 |
| <b>SDI category</b>      |                    |                    |                      |        |                     |                     |                      |        |                     |                     |                      |        |                   |                   |                      |        |
| High                     | 5.36 (4.98, 5.77)  | 5.96 (5.55, 6.39)  | 0.36 (0.30, 0.41)    | <0.001 | 6.23 (4.87, 7.81)   | 6.10 (4.53, 7.66)   | -0.08 (-0.24, 0.08)  | 0.321  | 7.00 (6.18, 7.76)   | 4.03 (3.55, 4.59)   | -1.88 (-2.08, -1.67) | <0.001 | 0.10 (0.09, 0.11) | 0.06 (0.05, 0.06) | -1.87 (-2.08, -1.66) | <0.001 |
| High-middle              | 1.50 (1.37, 1.67)  | 1.80 (1.58, 2.04)  | 0.60 (0.53, 0.67)    | <0.001 | 0.38 (0.21, 0.57)   | 0.42 (0.23, 0.60)   | 0.32 (-0.24, 0.89)   | 0.261  | 7.64 (6.45, 9.06)   | 5.02 (4.39, 6.15)   | -1.46 (-1.76, -1.15) | <0.001 | 0.11 (0.09, 0.13) | 0.07 (0.06, 0.09) | -1.46 (-1.76, -1.15) | <0.001 |
| Middle                   | 0.36 (0.31, 0.41)  | 0.41 (0.34, 0.41)  | 0.41 (0.31, 0.41)    | <0.001 | —                   | —                   | —                    | —      | 7.44 (5.46, 6.25)   | 6.25 (4.83, 6.25)   | -0.57 (-0.57, -0.57) | <0.001 | 0.10 (0.10, 0.10) | 0.09 (0.09, 0.09) | -0.57 (-0.57, -0.57) | <0.001 |

|                              |             |             |               |        |   |   |   |   |               |               |         |        |        |             |         |        |
|------------------------------|-------------|-------------|---------------|--------|---|---|---|---|---------------|---------------|---------|--------|--------|-------------|---------|--------|
|                              | 0.42)       | 0.48)       | 0.50)         |        |   |   |   |   | 9.47)         | 8.26)         | (-0.74, | (0.08, | (0.07, | (-0.73,     |         |        |
|                              |             |             |               |        |   |   |   |   |               |               | -0.41)  | 0.13)  | 0.12)  | -0.41)      |         |        |
| Low-middle                   | 0.20 (0.16, | 0.21 (0.17, | 0.16 (0.02,   | 0.024  | — | — | — | — | 6.11 (4.20,   | 6.16 (4.65,   | -0.03   | 0.09   | 0.09   | -0.03       |         |        |
|                              | 0.24)       | 0.25)       | 0.29)         |        |   |   |   |   | 8.75)         | 8.16)         | (-0.37, | 0.844  | (0.06, | (0.07,      | (-0.37, | 0.853  |
|                              |             |             |               |        |   |   |   |   |               |               | 0.30)   | 0.12)  | 0.11)  | 0.30)       |         |        |
| Low                          | 0.15 (0.12, | 0.17 (0.13, | 0.28 (0.22,   | <0.001 | — | — | — | — | 9.46 (5.21,   | 8.19 (5.70,   | -0.51   | 0.13   | 0.11   | -0.50       |         |        |
|                              | 0.19)       | 0.20)       | 0.34)         |        |   |   |   |   | 14.81)        | 11.07)        | (-0.76, | <0.001 | (0.07, | (0.08,      | (-0.76, | <0.001 |
|                              |             |             |               |        |   |   |   |   |               |               | -0.25)  | 0.21)  | 0.15)  | -0.25)      |         |        |
| <b>21 GBD region</b>         |             |             |               |        |   |   |   |   |               |               |         |        |        |             |         |        |
| South Asia                   | 0.12 (0.09, | 0.15 (0.12, | 0.84 (0.80,   | <0.001 | — | — | — | — | 4.28 (2.51,   | 4.41 (3.02,   | -0.04   | 0.06   | 0.06   | -0.04       |         |        |
|                              | 0.14)       | 0.18)       | 0.87)         |        |   |   |   |   | 7.04)         | 6.29)         | (-1.23, | 0.945  | (0.04, | (0.04,      | (-1.22, | 0.951  |
|                              |             |             |               |        |   |   |   |   |               |               | 1.16)   | 0.10)  | 0.09)  | 1.16)       |         |        |
| East Asia                    | 0.55 (0.50, | 0.64 (0.58, | 0.50 (0.36,   | <0.001 | — | — | — | — | 3.97 (2.63,   | 1.72 (1.33,   | -2.86   | 0.06   | 0.02   | -2.86       |         |        |
|                              | 0.62)       | 0.72)       | 0.65)         |        |   |   |   |   | 5.52)         | 2.35)         | (-3.05, | <0.001 | (0.04, | (0.02,      | (-3.05, | <0.001 |
|                              |             |             |               |        |   |   |   |   |               |               | -2.67)  | 0.08)  | 0.03)  | -2.67)      |         |        |
| North Africa and Middle East | 0.37 (0.28, | 0.41 (0.31, | 0.30 (0.26,   | <0.001 | — | — | — | — | 22.03 (15.23, | 16.00 (10.55, | -1.07   | 0.31   | 0.22   | -1.07       |         |        |
|                              | 0.48)       | 0.52)       | 0.34)         |        |   |   |   |   | 31.21)        | 23.69)        | (-1.29, | <0.001 | (0.21, | (0.15,      | (-1.29, | <0.001 |
|                              |             |             |               |        |   |   |   |   |               |               | -0.85)  | 0.44)  | 0.33)  | -0.85)      |         |        |
| Western Sub-Saharan Africa   | 0.20 (0.16, | 0.22 (0.18, | 0.33 (0.25,   | <0.001 | — | — | — | — | 8.07 (4.12,   | 7.80 (4.91,   | -0.11   | 0.11   | 0.11   | -0.11       |         |        |
|                              | 0.25)       | 0.27)       | 0.41)         |        |   |   |   |   | 13.39)        | 11.47)        | (-0.26, | 0.123  | (0.06, | (0.07,      | (-0.26, | 0.129  |
|                              |             |             |               |        |   |   |   |   |               |               | 0.03)   | 0.19)  | 0.16)  | 0.03)       |         |        |
| Southeast Asia               | 0.20 (0.16, | 0.24 (0.19, | 0.59 (0.58,   | <0.001 | — | — | — | — | 2.15 (1.45,   | 2.42 (1.75,   | 0.44    | 0.03   | 0.03   | 0.44 (0.05, | 0.026   |        |
|                              | 0.26)       | 0.30)       | 0.61)         |        |   |   |   |   | 3.65)         | 3.83)         | (0.05,  | 0.027  | (0.02, | (0.02,      | 0.83)   |        |
|                              |             |             |               |        |   |   |   |   |               |               | 0.83)   | 0.05)  | 0.05)  |             |         |        |
| Eastern Sub-Saharan Africa   | 0.14 (0.11, | 0.14 (0.11, | -0.03 (-0.11, | 0.474  | — | — | — | — | 15.15 (8.40,  | 11.13 (7.65,  | -1.05   | 0.21   | 0.16   | -1.05       |         |        |
|                              | 0.18)       | 0.18)       | 0.05)         |        |   |   |   |   | 23.82)        | 15.65)        | (-1.21, | <0.001 | (0.12, | (0.11,      | (-1.21, | <0.001 |
|                              |             |             |               |        |   |   |   |   |               |               | -0.89)  | 0.33)  | 0.22)  | -0.89)      |         |        |
| Central Latin America        | 0.14 (0.11, | 0.31 (0.24, | 2.68 (2.54,   | <0.001 | — | — | — | — | 8.31 (7.18,   | 6.41 (5.07,   | -0.87   | 0.12   | 0.09   | -0.87       |         |        |
|                              | 0.18)       | 0.39)       | 2.83)         |        |   |   |   |   | 9.63)         | 8.03)         | (-1.59, | 0.018  | (0.10, | (0.07,      | (-1.58, | 0.018  |
|                              |             |             |               |        |   |   |   |   |               |               | -0.15)  | 0.13)  | 0.11)  | -0.15)      |         |        |
| Tropical Latin America       | 0.27 (0.23, | 0.30 (0.25, | 0.35 (0.20,   | <0.001 | — | — | — | — | 23.65 (21.05, | 11.74 (10.09, | -2.42   | 0.33   | 0.16   | -2.42       |         |        |
|                              | 0.33)       | 0.37)       | 0.49)         |        |   |   |   |   | 26.64)        | 13.54)        | (-2.85, | <0.001 | (0.29, | (0.14,      | (-2.85, | <0.001 |
|                              |             |             |               |        |   |   |   |   |               |               | -2.00)  | 0.37)  | 0.19)  | -2.00)      |         |        |

|                             |                   |                     |                      |        |                     |                     |                      |        |                      |                     |                      |        |                   |                   |                      |        |
|-----------------------------|-------------------|---------------------|----------------------|--------|---------------------|---------------------|----------------------|--------|----------------------|---------------------|----------------------|--------|-------------------|-------------------|----------------------|--------|
| Central Sub-Saharan Africa  | 0.14 (0.10, 0.19) | 0.14 (0.09, 0.19)   | -0.16 (-0.22, -0.10) | <0.001 | —                   | —                   | —                    | —      | 10.11 (4.62, 18.98)  | 7.32 (4.01, 12.69)  | -1.15 (-1.33, -0.97) | <0.001 | 0.14 (0.06, 0.27) | 0.10 (0.06, 0.18) | -1.15 (-1.33, -0.97) | <0.001 |
| Western Europe              | 1.59 (1.48, 1.72) | 1.75 (1.59, 1.93)   | 0.34 (0.22, 0.47)    | <0.001 | 1.32 (0.70, 2.01)   | 1.05 (0.59, 1.56)   | -0.71 (-1.64, 0.24)  | 0.141  | 9.27 (7.96, 10.47)   | 4.96 (4.07, 5.83)   | -2.19 (-2.72, -1.66) | <0.001 | 0.13 (0.11, 0.15) | 0.07 (0.06, 0.08) | -2.19 (-2.72, -1.66) | <0.001 |
| High-income North America   | 8.65 (8.11, 9.21) | 9.12 (8.56, 9.64)   | 0.15 (0.06, 0.24)    | 0.001  | 12.26 (8.91, 16.00) | 11.40 (7.80, 14.96) | -0.27 (-0.41, -0.12) | <0.001 | 7.79 (6.75, 8.70)    | 4.37 (3.87, 5.15)   | -1.97 (-2.57, -1.36) | <0.001 | 0.11 (0.09, 0.12) | 0.06 (0.05, 0.07) | -1.97 (-2.57, -1.36) | <0.001 |
| Central Asia                | 2.39 (1.73, 3.16) | 2.80 (2.10, 3.65)   | 0.55 (0.53, 0.57)    | <0.001 | —                   | —                   | —                    | —      | 2.46 (2.06, 2.94)    | 4.55 (3.34, 6.01)   | 2.24 (0.90, 3.60)    | 0.001  | 0.03 (0.03, 0.04) | 0.06 (0.05, 0.08) | 2.25 (0.90, 3.60)    | 0.001  |
| Eastern Europe              | 3.54 (3.23, 3.89) | 5.99 (5.14, 6.99)   | 1.83 (1.78, 1.88)    | <0.001 | —                   | 0.91 (0.00, 2.00)   | —                    | —      | 3.85 (3.33, 4.31)    | 5.10 (4.03, 6.34)   | 1.38 (0.70, 2.06)    | <0.001 | 0.05 (0.05, 0.06) | 0.07 (0.06, 0.09) | 1.38 (0.70, 2.07)    | <0.001 |
| Southern Sub-Saharan Africa | 0.28 (0.23, 0.33) | 0.80 (0.59, 1.03)   | 3.64 (3.35, 3.93)    | <0.001 | —                   | —                   | —                    | —      | 14.07 (10.15, 18.95) | 11.41 (7.88, 17.39) | -0.60 (-1.24, 0.04)  | 0.067  | 0.20 (0.14, 0.27) | 0.16 (0.11, 0.24) | -0.60 (-1.24, 0.04)  | 0.067  |
| High-income Asia Pacific    | 8.86 (8.11, 9.71) | 10.61 (9.69, 11.68) | 0.63 (0.54, 0.72)    | <0.001 | 9.30 (6.64, 12.34)  | 9.42 (6.46, 12.62)  | 0.16 (-0.12, 0.44)   | 0.259  | 5.12 (4.04, 6.29)    | 2.10 (1.66, 2.50)   | -3.09 (-3.47, -2.71) | <0.001 | 0.07 (0.06, 0.09) | 0.03 (0.02, 0.03) | -3.10 (-3.47, -2.72) | <0.001 |
| Central Europe              | 2.90 (2.38, 3.47) | 4.88 (4.08, 5.81)   | 1.82 (1.75, 1.90)    | <0.001 | —                   | —                   | —                    | —      | 6.85 (5.83, 7.93)    | 7.16 (5.72, 8.78)   | 0.32 (-0.19, 0.83)   | 0.224  | 0.10 (0.08, 0.11) | 0.10 (0.08, 0.12) | 0.32 (-0.19, 0.83)   | 0.217  |
| Andean Latin America        | 0.13 (0.09, 0.17) | 0.42 (0.31, 0.54)   | 4.18 (3.97, 4.40)    | <0.001 | —                   | —                   | —                    | —      | 11.31 (7.39, 16.29)  | 9.93 (6.48, 14.69)  | -0.50 (-0.86, -0.15) | 0.006  | 0.16 (0.10, 0.23) | 0.14 (0.09, 0.21) | -0.50 (-0.85, -0.14) | 0.006  |
| Caribbean                   | 0.34 (0.26, 0.42) | 0.51 (0.41, 0.64)   | 1.44 (1.34, 1.54)    | <0.001 | —                   | —                   | —                    | —      | 15.31 (10.70, 19.95) | 11.69 (7.46, 17.53) | -0.91 (-1.24, -0.57) | <0.001 | 0.21 (0.15, 0.28) | 0.16 (0.10, 0.25) | -0.91 (-1.24, -0.57) | <0.001 |
| Southern Latin America      | 0.53 (0.38, 0.72) | 1.08 (0.84, 1.35)   | 2.45 (2.40, 2.50)    | <0.001 | —                   | —                   | —                    | —      | 9.43 (7.16, 12.61)   | 7.75 (5.75, 10.09)  | -0.69 (-1.01, -0.37) | <0.001 | 0.13 (0.10, 0.18) | 0.11 (0.08, 0.14) | -0.69 (-1.01, -0.37) | <0.001 |

|                    | 2019                 | 2020                 | 2021                 | 2022                 | 2023                 | 2024                 | 2025                 | 2026                 | 2027                 | 2028                 | 2029                 | 2030                 | 2031              | 2032              | 2033                 | 2034                 | 2035   |
|--------------------|----------------------|----------------------|----------------------|----------------------|----------------------|----------------------|----------------------|----------------------|----------------------|----------------------|----------------------|----------------------|-------------------|-------------------|----------------------|----------------------|--------|
| Oceania            | 0.32 (0.23, 0.43)    | 0.33 (0.23, 0.45)    | 0.05 (-0.10, 0.19)   | 0.515                | —                    | —                    | —                    | —                    | 27.55 (14.70, 48.32) | 27.20 (14.71, 45.82) | -0.05 (-0.33, 0.23)  | 0.717                | 0.39 (0.21, 0.68) | 0.38 (0.21, 0.64) | -0.05 (-0.33, 0.23)  | 0.717                |        |
|                    | 0.87 (0.71, 1.08)    | 2.73 (2.13, 3.40)    | 4.03 (3.91, 4.15)    | <0.001               | —                    | —                    | —                    | —                    | 7.34 (5.57, 9.57)    | 3.37 (2.36, 4.63)    | -2.71 (-3.83, -1.57) | <0.001               | 0.10 (0.08, 0.13) | 0.05 (0.03, 0.06) | -2.71 (-3.83, -1.57) | <0.001               |        |
| <b>20-24 years</b> |                      |                      |                      |                      |                      |                      |                      |                      |                      |                      |                      |                      |                   |                   |                      |                      |        |
| <b>Women</b>       |                      |                      |                      |                      |                      |                      |                      |                      |                      |                      |                      |                      |                   |                   |                      |                      |        |
| Global             | 4.61 (4.28, 4.96)    | 3.79 (3.52, 4.08)    | -0.69 (-0.77, -0.61) | <0.001               | 14.72 (13.39, 16.08) | 11.69 (10.69, 12.71) | -0.80 (-0.90, -0.70) | <0.001               | 8.77 (5.45, 12.84)   | 7.44 (5.18, 10.10)   | -0.55 (-0.67, -0.44) | <0.001               | 0.13 (0.08, 0.19) | 0.11 (0.08, 0.15) | -0.55 (-0.67, -0.44) | <0.001               |        |
|                    | <b>SDI category</b>  |                      |                      |                      |                      |                      |                      |                      |                      |                      |                      |                      |                   |                   |                      |                      |        |
| High               | 22.17 (20.81, 23.57) | 24.52 (23.14, 26.04) | 0.33 (0.17, 0.49)    | <0.001               | 82.76 (75.88, 90.28) | 90.61 (83.47, 98.53) | 0.28 (0.04, 0.53)    | 0.024                | 5.86 (5.39, 6.40)    | 4.47 (3.92, 5.17)    | -0.92 (-1.23, -0.60) | <0.001               | 0.09 (0.08, 0.09) | 0.07 (0.06, 0.08) | -0.93 (-1.25, -0.61) | <0.001               |        |
|                    | High-middle          | 5.51 (5.06, 6.03)    | 5.23 (4.77, 5.74)    | -0.17 (-0.23, -0.12) | <0.001               | 17.84 (15.13, 20.86) | 15.76 (12.97, 18.86) | -0.37 (-0.54, -0.21) | <0.001               | 6.74 (5.12, 8.47)    | 4.39 (3.85, 5.07)    | -1.46 (-1.67, -1.25) | <0.001            | 0.10 (0.08, 0.13) | 0.07 (0.06, 0.08)    | -1.46 (-1.68, -1.25) | <0.001 |
| Middle             |                      | 1.23 (1.07, 1.40)    | 1.11 (0.94, 1.28)    | -0.36 (-0.43, -0.30) | <0.001               | 0.77 (0.36, 1.31)    | 0.72 (0.35, 1.17)    | -0.21 (-0.33, -0.09) | 0.001                | 8.43 (5.60, 11.57)   | 6.12 (4.97, 7.59)    | -1.08 (-1.32, -0.84) | <0.001            | 0.13 (0.08, 0.17) | 0.09 (0.07, 0.11)    | -1.08 (-1.32, -0.84) | <0.001 |
|                    | Low-middle           | 0.59 (0.49, 0.71)    | 0.56 (0.46, 0.67)    | -0.25 (-0.32, -0.17) | <0.001               | 0.18 (0.07, 0.34)    | 0.18 (0.06, 0.32)    | -0.16 (-0.46, 0.15)  | 0.325                | 10.91 (4.53, 19.83)  | 9.07 (5.19, 13.91)   | -0.64 (-1.04, -0.24) | 0.002             | 0.16 (0.07, 0.30) | 0.14 (0.08, 0.21)    | -0.64 (-1.04, -0.24) | 0.002  |
| Low                |                      | 0.37 (0.28, 0.47)    | 0.39 (0.29, 0.49)    | 0.14 (0.05, 0.22)    | 0.002                | —                    | —                    | —                    | —                    | 13.75 (5.31, 25.87)  | 11.40 (5.97, 18.53)  | -0.64 (-0.74, -0.54) | <0.001            | 0.21 (0.08, 0.39) | 0.17 (0.09, 0.28)    | -0.64 (-0.74, -0.54) | <0.001 |
|                    | <b>21 GBD region</b> |                      |                      |                      |                      |                      |                      |                      |                      |                      |                      |                      |                   |                   |                      |                      |        |
| South Asia         | 0.25 (0.20, 0.31)    | 0.32 (0.26, 0.38)    | 0.75 (0.60, 0.89)    | <0.001               | —                    | —                    | —                    | —                    | 10.55 (2.81, 21.44)  | 8.09 (3.80, 13.86)   | -0.98 (-1.55, -0.41) | 0.001                | 0.16 (0.04, 0.32) | 0.12 (0.06, 0.21) | -0.98 (-1.55, -0.41) | 0.001                |        |
|                    | East Asia            | 2.24 (2.05, 2.48)    | 2.76 (2.53, 3.01)    | 0.74 (0.60, 0.88)    | <0.001               | 3.52 (2.18, 5.15)    | 5.52 (3.08, 8.53)    | 1.61 (0.97, 2.26)    | <0.001               | 4.10 (2.18, 6.39)    | 1.81 (1.40, 2.32)    | -2.74 (-3.21, -2.27) | <0.001            | 0.06 (0.03, 0.09) | 0.03 (0.02, 0.04)    | -2.73 (-3.38, -2.08) | <0.001 |



|                             |                      |                      |                      |        |                        |                        |                      |        |                      |                      |                      |        |              |              |                   |        |
|-----------------------------|----------------------|----------------------|----------------------|--------|------------------------|------------------------|----------------------|--------|----------------------|----------------------|----------------------|--------|--------------|--------------|-------------------|--------|
|                             |                      | 12.45)               |                      |        |                        |                        |                      |        |                      |                      | 3.23)                | 0.04)  | 0.09)        |              |                   |        |
| Southern Sub-Saharan Africa | 0.66 (0.58, 0.74)    | 0.56 (0.47, 0.65)    | -0.56 (-0.61, -0.51) | <0.001 | —                      | —                      | —                    | —      | 21.12 (15.97, 26.83) | 9.59 (6.11, 14.45)   | -2.62 (-3.82, -1.41) | <0.001 | (0.24, 0.40) | (0.09, 0.22) | (-3.83, -1.41)    | <0.001 |
| High-income Asia Pacific    | 27.86 (25.90, 30.04) | 29.04 (26.96, 31.38) | 0.14 (0.10, 0.18)    | <0.001 | 104.81 (90.18, 120.16) | 111.60 (95.13, 128.53) | 0.20 (0.09, 0.32)    | <0.001 | 4.39 (3.78, 5.23)    | 2.46 (2.00, 3.00)    | -2.00 (-2.35, -1.65) | <0.001 | (0.06, 0.08) | (0.03, 0.04) | (-2.39, -1.68)    | <0.001 |
| Central Europe              | 9.45 (7.72, 11.33)   | 12.89 (10.85, 15.00) | 1.08 (1.04, 1.13)    | <0.001 | 34.45 (24.89, 45.07)   | 46.88 (36.51, 59.37)   | 1.09 (0.71, 1.47)    | <0.001 | 5.25 (4.35, 6.10)    | 5.67 (4.54, 7.06)    | 0.29 (0.02, 0.56)    | 0.032  | (0.06, 0.09) | (0.07, 0.11) | 0.29 (0.02, 0.56) | 0.033  |
| Andean Latin America        | 0.51 (0.36, 0.67)    | 0.69 (0.52, 0.89)    | 1.10 (1.02, 1.18)    | <0.001 | —                      | —                      | —                    | —      | 14.38 (7.87, 21.55)  | 7.59 (5.07, 11.06)   | -2.17 (-3.10, -1.24) | <0.001 | (0.12, 0.32) | (0.08, 0.17) | (-3.10, -1.24)    | <0.001 |
| Caribbean                   | 0.71 (0.53, 0.91)    | 0.80 (0.60, 1.01)    | 0.37 (0.29, 0.45)    | <0.001 | —                      | —                      | —                    | —      | 14.17 (8.47, 23.70)  | 13.67 (7.07, 28.02)  | -0.04 (-0.32, 0.24)  | 0.801  | (0.13, 0.36) | (0.11, 0.42) | (-0.31, 0.25)     | 0.812  |
| Southern Latin America      | 1.87 (1.34, 2.52)    | 2.50 (1.86, 3.28)    | 1.00 (0.96, 1.04)    | <0.001 | —                      | —                      | —                    | —      | 8.28 (6.27, 10.70)   | 5.87 (4.63, 7.52)    | -1.12 (-1.51, -0.73) | <0.001 | (0.09, 0.16) | (0.07, 0.11) | (-1.51, -0.73)    | <0.001 |
| Oceania                     | 1.66 (1.22, 2.20)    | 1.67 (1.21, 2.21)    | -0.04 (-0.17, 0.09)  | 0.547  | —                      | —                      | —                    | —      | 24.00 (10.63, 48.11) | 27.34 (11.68, 56.55) | 0.41 (0.05, 0.77)    | 0.026  | (0.16, 0.72) | (0.18, 0.85) | 0.41 (0.05, 0.77) | 0.026  |
| Australasia                 | 2.96 (2.44, 3.59)    | 6.35 (5.11, 7.85)    | 2.67 (2.58, 2.75)    | <0.001 | 4.84 (1.74, 8.47)      | 17.24 (4.77, 33.63)    | 4.53 (4.06, 5.00)    | <0.001 | 7.11 (5.37, 9.15)    | 3.86 (2.91, 5.03)    | -2.00 (-2.90, -1.10) | <0.001 | (0.08, 0.14) | (0.04, 0.08) | (-2.90, -1.10)    | <0.001 |
| <b>Men</b>                  |                      |                      |                      |        |                        |                        |                      |        |                      |                      |                      |        |              |              |                   |        |
| Global                      | 3.55 (3.27, 3.89)    | 3.27 (2.98, 3.60)    | -0.30 (-0.37, -0.23) | <0.001 | 10.45 (9.34, 11.65)    | 9.75 (8.71, 10.82)     | -0.24 (-0.32, -0.15) | <0.001 | 8.87 (7.40, 10.76)   | 7.63 (6.46, 9.15)    | -0.50 (-0.67, -0.33) | <0.001 | (0.11, 0.16) | (0.10, 0.14) | (-0.66, -0.33)    | <0.001 |
| <b>SDI category</b>         |                      |                      |                      |        |                        |                        |                      |        |                      |                      |                      |        |              |              |                   |        |
| High                        | 15.55 (14.46, 16.74) | 17.40 (16.17, 18.68) | 0.36 (0.24, 0.47)    | <0.001 | 56.05 (49.91, 62.41)   | 65.06 (58.24, 72.39)   | 0.50 (0.40, 0.59)    | <0.001 | 9.76 (8.86, 10.63)   | 6.23 (5.54, 7.19)    | -1.55 (-1.89, -1.21) | <0.001 | (0.13, 0.16) | (0.08, 0.11) | (-1.96, -1.23)    | <0.001 |

|                                 |             |             |               |        |               |               |             |        |               |               |         |        |        |        |              |        |
|---------------------------------|-------------|-------------|---------------|--------|---------------|---------------|-------------|--------|---------------|---------------|---------|--------|--------|--------|--------------|--------|
| High-middle                     | 4.38 (3.98, | 5.24 (4.61, | 0.63 (0.57,   | <0.001 | 13.05 (10.87, | 16.63 (13.68, | 0.84 (0.70, | <0.001 | 9.58 (8.02,   | 6.28 (5.43,   | -1.41   | <0.001 | 0.14   | 0.09   | -1.42        | <0.001 |
|                                 | 4.85)       | 5.92)       | 0.69)         |        | 15.37)        | 19.74)        | 0.98)       |        | 11.80)        | 7.83)         | (-1.78, |        | (0.12, | (0.08, | (-1.78,      |        |
| Middle                          | 1.11 (0.96, | 1.23 (1.04, | 0.38 (0.32,   | <0.001 | 0.52 (0.23,   | 0.92 (0.50,   | 2.12 (1.84, | <0.001 | 8.87 (7.01,   | 8.08 (6.15,   | -0.32   | <0.001 | 0.13   | 0.12   | -0.32        | <0.001 |
|                                 | 1.27)       | 1.45)       | 0.44)         |        | 0.84)         | 1.43)         | 2.40)       |        | 11.25)        | 10.88)        | (-0.42, |        | (0.11, | (0.09, | (-0.42,      |        |
| Low-middle                      | 0.60 (0.50, | 0.64 (0.53, | 0.21 (0.16,   | <0.001 | 0.27 (0.13,   | 0.27 (0.12,   | -0.02       | 0.877  | 7.31 (5.26,   | 7.27 (5.67,   | -0.01   | 0.973  | 0.11   | 0.11   | -0.00        | 0.981  |
|                                 | 0.72)       | 0.77)       | 0.26)         |        | 0.45)         | 0.44)         | (-0.33,     |        | 10.14)        | 9.34)         | (-0.33, |        | (0.08, | (0.09, | (-0.33,      |        |
| Low                             | 0.45 (0.35, | 0.50 (0.39, | 0.30 (0.24,   | <0.001 | —             | —             | —           | —      | 9.49 (5.78,   | 9.46 (6.62,   | 0.00    | 0.979  | 0.14   | 0.14   | 0.00 (-0.17, | 0.970  |
|                                 | 0.56)       | 0.61)       | 0.36)         |        | —             | —             | —           |        | 15.02)        | 13.01)        | (-0.17, |        | (0.09, | (0.10, | 0.18)        |        |
| <b>21 GBD region</b>            |             |             |               |        |               |               |             |        |               |               |         |        |        |        |              |        |
| South Asia                      | 0.35 (0.28, | 0.45 (0.37, | 0.85 (0.80,   | <0.001 | —             | —             | —           | —      | 5.53 (3.60,   | 5.94 (4.45,   | 0.27    | 0.289  | 0.08   | 0.09   | 0.27 (-0.22, | 0.280  |
|                                 | 0.42)       | 0.53)       | 0.89)         |        | —             | —             | —           |        | 8.52)         | 8.38)         | (-0.22, |        | (0.05, | (0.07, | 0.76)        |        |
| East Asia                       | 1.70 (1.54, | 2.10 (1.90, | 0.73 (0.66,   | <0.001 | 1.51 (0.68,   | 3.06 (1.38,   | 2.48 (1.89, | <0.001 | 4.39 (2.93,   | 2.56 (1.99,   | -1.92   | <0.001 | 0.07   | 0.04   | -1.92        | <0.001 |
|                                 | 1.89)       | 2.35)       | 0.80)         |        | 2.53)         | 5.64)         | 3.07)       |        | 6.13)         | 3.29)         | (-2.37, |        | (0.04, | (0.03, | (-2.37,      |        |
| North Africa and<br>Middle East | 1.14 (0.86, | 1.27 (0.97, | 0.41 (0.30,   | <0.001 | 0.02 (0.00,   | 0.09 (0.00,   | 5.38 (4.71, | <0.001 | 30.95 (21.61, | 22.04 (14.80, | -1.13   | <0.001 | 0.46   | 0.33   | -1.13        | <0.001 |
|                                 | 1.45)       | 1.61)       | 0.52)         |        | 0.05)         | 0.27)         | 6.05)       |        | 42.69)        | 32.28)        | (-1.32, |        | (0.32, | (0.22, | (-1.32,      |        |
| Western<br>Sub-Saharan Africa   | 0.60 (0.48, | 0.66 (0.53, | 0.33 (0.26,   | <0.001 | —             | —             | —           | —      | 6.56 (3.62,   | 6.92 (4.49,   | 0.21    | 0.001  | 0.10   | 0.10   | 0.21 (0.08,  | 0.001  |
|                                 | 0.74)       | 0.81)       | 0.40)         |        | —             | —             | —           |        | 10.67)        | 10.25)        | (0.08,  |        | (0.05, | (0.07, | 0.34)        |        |
| Southeast Asia                  | 0.61 (0.48, | 0.73 (0.58, | 0.60 (0.57,   | <0.001 | —             | —             | —           | —      | 3.54 (2.56,   | 3.73 (2.87,   | 0.18    | 0.148  | 0.05   | 0.06   | 0.18 (-0.07, | 0.150  |
|                                 | 0.78)       | 0.91)       | 0.62)         |        | —             | —             | —           |        | 5.39)         | 5.19)         | (-0.06, |        | (0.04, | (0.04, | 0.44)        |        |
| Eastern Sub-Saharan<br>Africa   | 0.43 (0.33, | 0.43 (0.33, | -0.03 (-0.11, | 0.515  | —             | —             | —           | —      | 14.47 (8.76,  | 11.62 (7.91,  | -0.75   | <0.001 | 0.22   | 0.17   | -0.75        | <0.001 |
|                                 | 0.54)       | 0.54)       | 0.05)         |        | —             | —             | —           |        | 22.24)        | 16.75)        | (-0.92, |        | (0.13, | (0.12, | (-0.91,      |        |
| Central Latin<br>America        | 0.43 (0.33, | 0.92 (0.71, | 2.68 (2.56,   | <0.001 | —             | —             | —           | —      | 8.60 (7.37,   | 5.87 (4.60,   | -1.25   | <0.001 | 0.13   | 0.09   | -1.25        | <0.001 |
|                                 | 0.55)       | 1.17)       | 2.80)         |        | —             | —             | —           |        | 10.05)        | 7.33)         | (-1.56, |        | (0.11, | (0.07, | (-1.56,      |        |





|                        |                      |                      |                      |        |                         |                         |                      |        |                      |                      |  |  |        |       |       |        |
|------------------------|----------------------|----------------------|----------------------|--------|-------------------------|-------------------------|----------------------|--------|----------------------|----------------------|--|--|--------|-------|-------|--------|
|                        |                      |                      |                      |        |                         |                         |                      |        |                      |                      |  |  | -0.88) | 0.35) | 0.28) | -0.88) |
| Southern Latin America | 1.60 (1.15, 2.16)    | 3.27 (2.55, 4.06)    | 2.48 (2.42, 2.54)    | <0.001 | —                       | 2.95 (0.00, 7.94)       | —                    | —      | 8.03 (5.94, 10.80)   | 6.60 (4.97, 8.50)    |  |  | -0.68  | 0.12  | 0.10  | -0.68  |
|                        |                      |                      |                      |        |                         |                         |                      |        |                      |                      |  |  | -0.26) | 0.16) | 0.13) | -0.26) |
| Oceania                | 0.96 (0.68, 1.31)    | 0.98 (0.69, 1.34)    | 0.02 (-0.13, 0.17)   | 0.786  | —                       | —                       | —                    | —      | 23.85 (12.80, 44.19) | 21.99 (12.00, 40.92) |  |  | -0.37  | 0.36  | 0.33  | -0.37  |
|                        |                      |                      |                      |        |                         |                         |                      |        |                      |                      |  |  | -0.17) | 0.66) | 0.61) | -0.17) |
| Australasia            | 2.58 (2.10, 3.20)    | 8.16 (6.35, 10.19)   | 4.05 (3.90, 4.19)    | <0.001 | 3.35 (1.00, 6.44)       | 25.41 (8.86, 46.20)     | 7.36 (6.70, 8.03)    | <0.001 | 9.97 (7.47, 12.76)   | 5.44 (3.92, 7.56)    |  |  | -2.00  | 0.15  | 0.08  | -2.01  |
|                        |                      |                      |                      |        |                         |                         |                      |        |                      |                      |  |  | -1.41) | 0.19) | 0.11) | -1.41) |
| <b>25-29 years</b>     |                      |                      |                      |        |                         |                         |                      |        |                      |                      |  |  |        |       |       |        |
| <b>Women</b>           |                      |                      |                      |        |                         |                         |                      |        |                      |                      |  |  |        |       |       |        |
| Global                 | 8.78 (8.15, 9.44)    | 6.86 (6.37, 7.37)    | -0.84 (-0.93, -0.74) | <0.001 | 52.41 (48.29, 56.63)    | 38.93 (35.87, 42.14)    | -1.01 (-1.11, -0.92) | <0.001 | 10.21 (6.79, 14.23)  | 8.19 (6.02, 10.73)   |  |  | -0.74  | 0.16  | 0.13  | -0.74  |
|                        |                      |                      |                      |        |                         |                         |                      |        |                      |                      |  |  | -0.98) | 0.11) | 0.10) | -0.98) |
|                        |                      |                      |                      |        |                         |                         |                      |        |                      |                      |  |  | -0.51) | 0.23) | 0.17) | -0.50) |
| <b>SDI category</b>    |                      |                      |                      |        |                         |                         |                      |        |                      |                      |  |  |        |       |       |        |
| High                   | 37.28 (34.99, 39.65) | 40.17 (37.89, 42.68) | 0.22 (0.10, 0.35)    | <0.001 | 232.09 (215.53, 249.17) | 249.79 (232.63, 267.78) | 0.21 (0.07, 0.36)    | 0.004  | 8.43 (7.80, 9.14)    | 6.56 (5.81, 7.76)    |  |  | -0.86  | 0.13  | 0.10  | -0.88  |
|                        |                      |                      |                      |        |                         |                         |                      |        |                      |                      |  |  | -1.19) | 0.12) | 0.09) | -1.23) |
|                        |                      |                      |                      |        |                         |                         |                      |        |                      |                      |  |  | -0.54) | 0.14) | 0.12) | -0.54) |
| High-middle            | 9.70 (8.92, 10.63)   | 8.65 (7.91, 9.47)    | -0.39 (-0.45, -0.33) | <0.001 | 59.13 (52.31, 66.85)    | 49.89 (43.38, 56.99)    | -0.57 (-0.72, -0.42) | <0.001 | 7.48 (5.77, 9.25)    | 4.89 (4.25, 5.61)    |  |  | -1.40  | 0.12  | 0.08  | -1.40  |
|                        |                      |                      |                      |        |                         |                         |                      |        |                      |                      |  |  | -1.98) | 0.09) | 0.07) | -1.99) |
|                        |                      |                      |                      |        |                         |                         |                      |        |                      |                      |  |  | -0.81) | 0.15) | 0.09) | -0.81) |
| Middle                 | 2.03 (1.76, 2.32)    | 1.93 (1.66, 2.22)    | -0.17 (-0.20, -0.13) | <0.001 | 9.23 (6.91, 11.83)      | 7.14 (5.15, 9.38)       | -0.90 (-1.03, -0.77) | <0.001 | 10.61 (7.19, 14.35)  | 7.42 (5.96, 9.22)    |  |  | -1.20  | 0.17  | 0.12  | -1.20  |
|                        |                      |                      |                      |        |                         |                         |                      |        |                      |                      |  |  | -1.52) | 0.12) | 0.10) | -1.52) |
|                        |                      |                      |                      |        |                         |                         |                      |        |                      |                      |  |  | -0.88) | 0.23) | 0.15) | -0.89) |
| Low-middle             | 0.98 (0.80, 1.18)    | 0.97 (0.80, 1.16)    | -0.05 (-0.13, 0.02)  | 0.179  | 3.45 (2.19, 4.96)       | 2.25 (1.37, 3.23)       | -1.46 (-1.69, -1.24) | <0.001 | 11.10 (5.15, 18.97)  | 9.70 (5.92, 14.28)   |  |  | -0.45  | 0.18  | 0.16  | -0.45  |
|                        |                      |                      |                      |        |                         |                         |                      |        |                      |                      |  |  | -0.84) | 0.08) | 0.10) | -0.84) |
|                        |                      |                      |                      |        |                         |                         |                      |        |                      |                      |  |  | -0.05) | 0.31) | 0.23) | -0.05) |
| Low                    | 0.61 (0.46, 0.78)    | 0.65 (0.50, 0.83)    | 0.20 (0.06, 0.34)    | 0.006  | 0.50 (0.13, 0.98)       | 0.48 (0.10, 0.98)       | -0.24 (-0.94, 0.47)  | 0.511  | 16.70 (6.31, 31.67)  | 12.57 (6.39, 20.55)  |  |  | -0.97  | 0.27  | 0.20  | -0.97  |
|                        |                      |                      |                      |        |                         |                         |                      |        |                      |                      |  |  | -1.09) | 0.10) | 0.10) | -1.09) |
|                        |                      |                      |                      |        |                         |                         |                      |        |                      |                      |  |  | -0.85) | 0.51) | 0.33) | -0.85) |
| <b>21 GBD region</b>   |                      |                      |                      |        |                         |                         |                      |        |                      |                      |  |  |        |       |       |        |
| South Asia             | 0.42 (0.34, 0.42)    | 0.53 (0.44, 0.53)    | 0.76 (0.61, 0.76)    | <0.001 | —                       | —                       | —                    | —      | 9.49 (3.00, 9.49)    | 8.13 (4.06, 8.13)    |  |  | -0.44  | 0.15  | 0.13  | -0.44  |
|                        |                      |                      |                      |        |                         |                         |                      |        |                      |                      |  |  | 0.169) | 0.15) | 0.13) | -0.44) |

|                              |             |             |               |        |               |               |              |        |               |               |         |        |        |         |             |        |
|------------------------------|-------------|-------------|---------------|--------|---------------|---------------|--------------|--------|---------------|---------------|---------|--------|--------|---------|-------------|--------|
|                              | 0.51)       | 0.63)       | 0.90)         |        |               |               |              |        | 18.03)        | 13.05)        | (-1.07, | (0.05, | (0.07, | (-1.07, |             |        |
|                              |             |             |               |        |               |               |              |        |               |               | 0.19)   | 0.29)  | 0.21)  | 0.19)   |             |        |
|                              |             |             |               |        |               |               |              |        |               |               | -2.47   | 0.07   | 0.03   | -2.50   |             |        |
| East Asia                    | 3.94 (3.61, | 4.59 (4.22, | 0.54 (0.43,   | <0.001 | 23.65 (19.28, | 24.95 (19.27, | 0.17 (0.00,  | 0.050  | 4.27 (2.13,   | 1.96 (1.48,   | (-3.94, | 0.001  | (0.03, | (0.02,  | (-3.98,     | 0.001  |
|                              | 4.34)       | 5.02)       | 0.65)         |        | 28.76)        | 31.13)        | 0.33)        |        | 7.02)         | 2.56)         | -0.99)  |        | (0.11, | (0.04,  | (-1.00)     |        |
|                              |             |             |               |        |               |               |              |        |               |               | -1.49   |        | 0.54   | 0.35    | -1.49       |        |
| North Africa and Middle East | 2.58 (1.93, | 2.72 (2.04, | 0.19 (0.14,   | <0.001 | 15.37 (9.42,  | 15.47 (9.39,  | 0.02 (-0.17, | 0.839  | 33.21 (19.98, | 21.34 (15.26, | (-1.62, | <0.001 | (0.32, | (0.25,  | (-1.62,     | <0.001 |
|                              | 3.32)       | 3.50)       | 0.25)         |        | 22.73)        | 22.84)        | 0.21)        |        | 49.15)        | 29.38)        | -1.36)  |        | (0.80, | (0.48,  | (-1.36)     |        |
|                              |             |             |               |        |               |               |              |        |               |               | -0.35   |        | 0.31   | 0.28    | -0.35       |        |
| Western Sub-Saharan Africa   | 0.61 (0.47, | 0.66 (0.51, | 0.24 (0.16,   | <0.001 | —             | —             | —            | —      | 19.29 (7.15,  | 17.35 (9.01,  | (-0.49, | <0.001 | (0.12, | (0.15,  | (-0.49,     | <0.001 |
|                              | 0.78)       | 0.83)       | 0.32)         |        |               |               |              |        | 41.25)        | 28.94)        | -0.21)  |        | (0.67, | (0.47,  | (-0.21)     |        |
|                              |             |             |               |        |               |               |              |        |               |               | -1.12   |        | 0.06   | 0.05    | -1.13       |        |
| Southeast Asia               | 1.17 (0.91, | 1.37 (1.09, | 0.55 (0.53,   | <0.001 | 0.002 (0.000, | 0.64 (0.02,   | 26.76        | <0.001 | 3.99 (2.22,   | 2.86 (2.20,   | (-1.24, | <0.001 | (0.04, | (0.04,  | (-1.24,     | <0.001 |
|                              | 1.48)       | 1.71)       | 0.56)         |        | 0.004)        | 1.56)         | (20.60,      |        | 6.15)         | 3.62)         | -1.01)  |        | (0.10, | (0.06,  | (-1.01)     |        |
|                              |             |             |               |        |               |               | 33.23)       |        |               |               | -2.23   |        | 0.35   | 0.18    | -2.23       |        |
| Eastern Sub-Saharan Africa   | 0.59 (0.45, | 0.54 (0.41, | -0.31 (-0.50, | 0.001  | —             | —             | —            | —      | 21.88 (8.35,  | 11.40 (6.47,  | (-2.45, | <0.001 | (0.14, | (0.10,  | (-2.45,     | <0.001 |
|                              | 0.75)       | 0.70)       | -0.13)        |        |               |               |              |        | 40.96)        | 17.60)        | -2.00)  |        | (0.66, | (0.29,  | (-2.00)     |        |
|                              |             |             |               |        |               |               |              |        |               |               | -0.80   |        | 0.17   | 0.13    | -0.80       |        |
| Central Latin America        | 0.92 (0.74, | 1.15 (0.92, | 0.78 (0.72,   | <0.001 | —             | —             | —            | —      | 10.39 (9.07,  | 8.25 (6.13,   | (-1.53, | 0.034  | (0.15, | (0.10,  | (-1.54,     | 0.035  |
|                              | 1.12)       | 1.39)       | 0.83)         |        |               |               |              |        | 11.79)        | 10.75)        | -0.06)  |        | (0.19, | (0.17,  | (-0.06)     |        |
|                              |             |             |               |        |               |               |              |        |               |               | -2.99   |        | 0.49   | 0.21    | -2.99       |        |
| Tropical Latin America       | 2.00 (1.78, | 1.88 (1.65, | -0.26 (-0.48, | 0.021  | 10.56 (6.35,  | —             | —            | —      | 30.20 (27.21, | 12.81 (11.39, | (-3.14, | <0.001 | (0.44, | (0.18,  | (-3.15,     | <0.001 |
|                              | 2.22)       | 2.13)       | -0.04)        |        | 15.51)        |               |              |        | 33.58)        | 14.45)        | -2.83)  |        | (0.55, | (0.23,  | (-2.83)     |        |
|                              |             |             |               |        |               |               |              |        |               |               | -1.46   |        | 0.18   | 0.12    | -1.47       |        |
| Central Sub-Saharan Africa   | 0.59 (0.38, | 0.54 (0.34, | -0.31 (-0.41, | <0.001 | —             | —             | —            | —      | 11.05 (3.66,  | 7.25 (3.27,   | (-1.60, | <0.001 | (0.06, | (0.05,  | (-1.60,     | <0.001 |
|                              | 0.84)       | 0.79)       | -0.22)        |        |               |               |              |        | 24.37)        | 13.94)        | -1.33)  |        | (0.40, | (0.23,  | (-1.33)     |        |
|                              |             |             |               |        |               |               |              |        |               |               | -1.41   |        | 0.12   | 0.08    | -1.42       |        |
| Western Europe               | 11.03       | 11.75       | 0.25 (0.04,   | 0.020  | 65.29 (60.00, | 68.53 (62.47, | 0.16 (-0.08, | 0.198  | 7.40 (6.64,   | 4.94 (4.44,   | (-1.89, | <0.001 | (0.11, | (0.07,  | (-1.90,     | <0.001 |
|                              | (10.32,     | (10.88,     | 0.46)         |        | 70.95)        | 74.95)        | 0.41)        |        | 8.27)         | 5.59)         | -0.93)  |        | (0.13, | (0.09,  | (-0.93)     |        |
|                              | 11.82)      | 12.71)      |               |        |               |               |              |        |               |               | -1.32   |        | 0.18   | 0.12    | -1.37       |        |
| High-income North America    | 73.18       | 75.49       | 0.08 (-0.05,  | 0.245  | 458.53        | 473.51        | 0.08 (-0.06, | 0.259  | 11.40 (10.50, | 7.79 (6.83,   | (-2.07, | 0.001  | (0.16, | (0.11,  | (-2.18,     | 0.001  |
|                              | (68.63,     | (71.42,     | 0.21)         |        | (424.86,      | (440.71,      | 0.22)        |        | 12.36)        | 8.88)         | -0.57)  |        | (0.19, | (0.14,  | (-0.56)     |        |
|                              | 77.54)      | 79.35)      |               |        | 494.48)       | 506.86)       |              |        |               |               |         |        |        |         |             |        |
| Central Asia                 | 8.05 (5.83, | 8.92 (6.56, | 0.35 (0.31,   | <0.001 | 49.70 (31.58, | 52.45 (33.36, | 0.17 (0.12,  | <0.001 | 3.87 (3.31,   | 6.50 (4.90,   | 1.71    | <0.001 | 0.06   | 0.10    | 1.73 (1.05, | <0.001 |





|                             |                      |                      |                      |        |                         |                         |                   |        |                      |                      |                |              |              |                |                   |        |
|-----------------------------|----------------------|----------------------|----------------------|--------|-------------------------|-------------------------|-------------------|--------|----------------------|----------------------|----------------|--------------|--------------|----------------|-------------------|--------|
| Africa                      | 0.90)                | 0.90)                | 0.05)                |        |                         |                         |                   |        | 26.07)               | 17.21)               | (-1.18, -0.81) | (0.15, 0.42) | (0.13, 0.28) | (-1.18, -0.81) |                   |        |
| Central Latin America       | 0.72 (0.55, 0.92)    | 1.56 (1.20, 1.97)    | 2.70 (2.57, 2.82)    | <0.001 | —                       | 2.05 (1.04, 3.32)       | —                 | —      | 12.75 (10.73, 14.95) | 10.33 (8.13, 12.77)  | (-1.14, -0.30) | 0.001        | (0.17, 0.24) | (0.13, 0.21)   | (-1.14, -0.30)    | 0.001  |
| Tropical Latin America      | 1.40 (1.16, 1.67)    | 1.53 (1.25, 1.87)    | 0.30 (0.16, 0.44)    | <0.001 | —                       | 0.25 (0.00, 0.57)       | —                 | —      | 34.95 (30.59, 39.89) | 15.29 (13.27, 17.86) | (-2.75, -3.13) | <0.001       | (0.50, 0.65) | (0.22, 0.29)   | (-3.14, -2.38)    | <0.001 |
| Central Sub-Saharan Africa  | 0.71 (0.48, 0.96)    | 0.68 (0.46, 0.95)    | -0.17 (-0.22, -0.12) | <0.001 | —                       | —                       | —                 | —      | 10.40 (4.18, 20.86)  | 8.68 (4.48, 15.66)   | (-0.67, -0.95) | <0.001       | (0.07, 0.34) | (0.07, 0.25)   | (-0.95, -0.39)    | <0.001 |
| Western Europe              | 7.20 (6.69, 7.77)    | 8.93 (8.11, 9.84)    | 0.75 (0.60, 0.90)    | <0.001 | 41.02 (37.02, 45.40)    | 50.64 (45.23, 56.20)    | 0.71 (0.46, 0.96) | <0.001 | 16.79 (14.59, 19.10) | 9.89 (8.64, 11.40)   | (-1.92, -2.32) | <0.001       | (0.24, 0.31) | (0.14, 0.18)   | (-2.33, -1.52)    | <0.001 |
| High-income North America   | 43.15 (40.48, 45.90) | 45.65 (42.86, 48.25) | 0.16 (0.06, 0.27)    | 0.002  | 270.28 (246.55, 295.75) | 285.78 (259.99, 309.86) | 0.16 (0.05, 0.27) | 0.004  | 16.37 (14.69, 17.92) | 9.41 (7.46, 11.22)   | (-1.96, -2.84) | <0.001       | (0.24, 0.29) | (0.12, 0.18)   | (-2.90, -1.09)    | <0.001 |
| Central Asia                | 11.97 (8.67, 15.84)  | 14.16 (10.67, 18.37) | 0.59 (0.57, 0.61)    | <0.001 | 74.19 (48.42, 105.38)   | 85.93 (58.32, 116.81)   | 0.52 (0.43, 0.61) | <0.001 | 4.24 (3.45, 5.26)    | 7.45 (5.71, 9.37)    | (1.92, 1.44)   | <0.001       | (0.06, 0.08) | (0.09, 0.15)   | 1.94 (1.46, 2.42) | <0.001 |
| Eastern Europe              | 17.74 (16.18, 19.47) | 29.80 (25.54, 34.69) | 1.81 (1.78, 1.83)    | <0.001 | 106.89 (89.89, 124.94)  | 186.35 (156.59, 222.53) | 1.94 (1.88, 1.99) | <0.001 | 4.64 (3.98, 5.42)    | 11.20 (9.02, 15.74)  | (3.20, 1.72)   | <0.001       | (0.06, 0.09) | (0.14, 0.25)   | 3.23 (1.73, 4.74) | <0.001 |
| Southern Sub-Saharan Africa | 1.50 (1.25, 1.80)    | 4.63 (3.41, 6.06)    | 3.95 (3.67, 4.24)    | <0.001 | —                       | 18.62 (9.61, 30.70)     | —                 | —      | 24.66 (17.03, 33.51) | 15.49 (11.09, 23.32) | (-1.69, -1.96) | <0.001       | (0.28, 0.54) | (0.18, 0.38)   | (-1.97, -1.43)    | <0.001 |
| High-income Asia Pacific    | 44.15 (40.20, 48.49) | 52.51 (47.71, 57.95) | 0.59 (0.51, 0.68)    | <0.001 | 277.17 (244.18, 316.18) | 328.84 (286.85, 375.71) | 0.60 (0.51, 0.69) | <0.001 | 8.87 (7.77, 10.22)   | 4.65 (3.73, 5.64)    | (-2.27, -2.52) | <0.001       | (0.12, 0.16) | (0.06, 0.09)   | (-2.60, -2.09)    | <0.001 |
| Central Europe              | 14.48 (11.92, 17.38) | 23.94 (20.13, 28.32) | 1.75 (1.70, 1.81)    | <0.001 | 87.68 (67.40, 110.84)   | 149.79 (119.62, 181.49) | 1.88 (1.81, 1.95) | <0.001 | 9.47 (7.96, 11.30)   | 12.10 (9.87, 14.50)  | (0.94, 0.47)   | <0.001       | (0.15, 0.18) | (0.19, 0.23)   | 0.87 (0.47, 1.28) | <0.001 |
| Andean Latin America        | 0.64 (0.43, 0.92)    | 2.04 (1.52, 2.82)    | 4.12 (3.92, 4.44)    | <0.001 | —                       | 5.18 (0.00, 10.36)      | —                 | —      | 13.20 (8.71, 17.69)  | 12.45 (8.42, 16.48)  | (-0.15, 0.551) | 0.551        | 0.21         | 0.20           | (-0.15, 0.544)    | 0.544  |

|                        |                      |                      |                      |        |                         |                         |                      |        |                      |                      |                |              |              |               |                |        |
|------------------------|----------------------|----------------------|----------------------|--------|-------------------------|-------------------------|----------------------|--------|----------------------|----------------------|----------------|--------------|--------------|---------------|----------------|--------|
| America                | 0.87)                | 2.63)                | 4.33)                |        |                         | 10.95)                  |                      |        | 19.06)               | 18.01)               | (-0.64, 0.35)  | (0.14, 0.31) | (0.14, 0.29) | (-0.65, 0.34) |                |        |
| Caribbean              | 1.69 (1.32, 2.09)    | 2.59 (2.05, 3.22)    | 1.47 (1.38, 1.55)    | <0.001 | 1.44 (0.06, 3.26)       | 3.76 (1.59, 6.50)       | 2.61 (2.10, 3.12)    | <0.001 | 26.72 (20.30, 33.78) | 20.74 (14.27, 30.04) | (-1.10, -0.61) | <0.001       | (0.33, 0.55) | (0.23, 0.49)  | (-1.10, -0.61) | <0.001 |
| Southern Latin America | 2.67 (1.91, 3.59)    | 5.51 (4.30, 6.83)    | 2.52 (2.44, 2.60)    | <0.001 | 14.95 (3.76, 29.37)     | 34.62 (16.65, 56.76)    | 3.12 (2.01, 4.24)    | <0.001 | 11.92 (8.74, 15.76)  | 10.20 (7.60, 13.42)  | (-0.86, -0.14) | 0.007        | (0.14, 0.26) | (0.12, 0.22)  | (-0.87, -0.14) | 0.006  |
| Oceania                | 1.61 (1.15, 2.20)    | 1.64 (1.15, 2.24)    | 0.00 (-0.15, 0.15)   | 0.978  | 0.88 (0.34, 1.61)       | 0.28 (0.09, 0.57)       | -3.97 (-5.93, -1.97) | <0.001 | 14.11 (7.17, 29.22)  | 13.91 (6.64, 27.90)  | (-0.07, -0.36) | 0.619        | (0.23, 0.47) | (0.23, 0.45)  | (-0.07, 0.22)  | 0.624  |
| Australasia            | 4.27 (3.48, 5.31)    | 13.57 (10.53, 16.99) | 4.06 (3.91, 4.21)    | <0.001 | 23.60 (9.24, 43.64)     | 84.43 (47.31, 126.84)   | 4.54 (3.97, 5.12)    | <0.001 | 12.49 (9.80, 15.80)  | 8.71 (6.48, 11.15)   | (-1.19, -2.14) | 0.015        | (0.20, 0.26) | (0.14, 0.18)  | (-1.20, -0.25) | 0.014  |
| <b>30-34 years</b>     |                      |                      |                      |        |                         |                         |                      |        |                      |                      |                |              |              |               |                |        |
| <b>Women</b>           |                      |                      |                      |        |                         |                         |                      |        |                      |                      |                |              |              |               |                |        |
| Global                 | 13.85 (12.89, 14.87) | 10.09 (9.38, 10.85)  | -1.12 (-1.21, -1.02) | <0.001 | 118.02 (109.56, 127.44) | 83.20 (77.20, 90.08)    | -1.23 (-1.32, -1.13) | <0.001 | 10.67 (7.64, 14.17)  | 7.94 (6.21, 9.87)    | (-1.03, -1.28) | <0.001       | (0.19, 0.25) | (0.14, 0.17)  | (-1.03, -0.78) | <0.001 |
| <b>SDI category</b>    |                      |                      |                      |        |                         |                         |                      |        |                      |                      |                |              |              |               |                |        |
| High                   | 53.57 (50.31, 56.97) | 54.50 (51.39, 57.84) | 0.03 (-0.10, 0.15)   | 0.681  | 466.71 (435.59, 499.20) | 474.91 (444.84, 508.53) | 0.03 (-0.10, 0.15)   | 0.682  | 11.15 (10.31, 12.17) | 8.22 (7.36, 9.41)    | (-1.01, -1.32) | <0.001       | (0.19, 0.20) | (0.14, 0.16)  | (-1.04, -0.66) | <0.001 |
| High-middle            | 14.31 (13.12, 15.70) | 12.25 (11.20, 13.41) | -0.53 (-0.61, -0.46) | <0.001 | 122.21 (110.36, 136.21) | 101.43 (91.12, 112.44)  | -0.64 (-0.71, -0.57) | <0.001 | 8.46 (6.89, 10.06)   | 5.52 (4.86, 6.21)    | (-1.42, -1.88) | <0.001       | (0.15, 0.17) | (0.10, 0.11)  | (-1.43, -0.95) | <0.001 |
| Middle                 | 2.80 (2.43, 3.22)    | 2.78 (2.41, 3.18)    | 0.01 (-0.10, 0.11)   | 0.894  | 22.22 (18.04, 27.02)    | 19.25 (15.44, 23.52)    | -0.48 (-0.59, -0.37) | <0.001 | 10.55 (7.52, 13.78)  | 6.87 (5.73, 8.23)    | (-1.49, -1.15) | <0.001       | (0.19, 0.24) | (0.12, 0.14)  | (-1.50, -1.15) | <0.001 |
| Low-middle             | 1.32 (1.08, 1.60)    | 1.39 (1.14, 1.67)    | 0.16 (0.08, 0.23)    | <0.001 | 6.82 (5.04, 8.90)       | 6.51 (4.58, 8.47)       | -0.23 (-0.46, 0.00)  | 0.054  | 11.53 (5.54, 19.15)  | 9.95 (6.40, 14.15)   | (-0.46, -0.08) | 0.017        | (0.20, 0.34) | (0.18, 0.25)  | (-0.45, -0.08) | 0.017  |
| Low                    | 0.85 (0.64, 0.91)    | 0.91 (0.69, 0.91)    | 0.24 (0.17, 0.24)    | <0.001 | 1.77 (0.96, 1.67)       | 1.67 (0.78, 1.67)       | -0.40                | 0.214  | 14.47 (6.02, 10.76)  | 10.76 (5.79, 10.76)  | (-1.03, -1.03) | <0.001       | (0.26, 0.26) | (0.19, 0.19)  | (-1.03, -1.03) | <0.001 |
| 231                    |                      |                      |                      |        |                         |                         |                      |        |                      |                      |                |              |              |               |                |        |

|                              |                      |                      |                      |        |                         |                         |                      |        |                      |                      |                      |              |                   |                   |                      |        |
|------------------------------|----------------------|----------------------|----------------------|--------|-------------------------|-------------------------|----------------------|--------|----------------------|----------------------|----------------------|--------------|-------------------|-------------------|----------------------|--------|
|                              | 1.08)                | 1.16)                | 0.31)                |        | 2.76)                   | 2.69)                   | (-1.03, 0.23)        |        | 26.09)               | 16.94)               | (-1.16, -0.90)       | (0.11, 0.46) | (0.10, 0.30)      | (-1.16, -0.90)    |                      |        |
| <b>21 GBD region</b>         |                      |                      |                      |        |                         |                         |                      |        |                      |                      |                      |              |                   |                   |                      |        |
| South Asia                   | 0.59 (0.48, 0.71)    | 0.74 (0.61, 0.88)    | 0.76 (0.62, 0.91)    | <0.001 | —                       | —                       | —                    | —      | 10.90 (3.94, 19.40)  | 9.62 (5.37, 14.16)   | -0.45 (-0.90, 0.01)  | 0.055        | 0.19 (0.07, 0.34) | 0.17 (0.09, 0.25) | -0.45 (-0.90, 0.01)  | 0.055  |
|                              |                      |                      |                      |        |                         |                         |                      |        |                      |                      |                      |              |                   |                   |                      |        |
| East Asia                    | 5.76 (5.29, 6.33)    | 6.60 (6.08, 7.22)    | 0.43 (0.26, 0.61)    | <0.001 | 49.25 (42.13, 57.11)    | 51.59 (44.25, 59.57)    | 0.13 (-0.07, 0.32)   | 0.208  | 4.46 (2.34, 7.11)    | 2.15 (1.64, 2.75)    | -2.37 (-3.66, -1.06) | <0.001       | 0.08 (0.04, 0.12) | 0.04 (0.03, 0.05) | -2.41 (-3.71, -1.09) | <0.001 |
|                              |                      |                      |                      |        |                         |                         |                      |        |                      |                      |                      |              |                   |                   |                      |        |
| North Africa and Middle East | 3.62 (2.71, 4.68)    | 3.89 (2.97, 4.97)    | 0.26 (0.19, 0.34)    | <0.001 | 30.17 (19.51, 42.33)    | 32.10 (21.20, 43.73)    | 0.21 (0.11, 0.32)    | <0.001 | 26.58 (16.18, 39.31) | 17.11 (12.44, 22.76) | -1.49 (-1.60, -1.39) | <0.001       | 0.47 (0.28, 0.69) | 0.30 (0.22, 0.40) | -1.50 (-1.60, -1.39) | <0.001 |
|                              |                      |                      |                      |        |                         |                         |                      |        |                      |                      |                      |              |                   |                   |                      |        |
| Western Sub-Saharan Africa   | 0.86 (0.66, 1.09)    | 0.92 (0.71, 1.16)    | 0.25 (0.16, 0.34)    | <0.001 | —                       | 0.02 (0.00, 0.04)       | —                    | —      | 8.35 (3.49, 16.17)   | 7.17 (4.06, 11.28)   | -0.53 (-0.69, -0.38) | <0.001       | 0.15 (0.06, 0.29) | 0.13 (0.07, 0.20) | -0.53 (-0.69, -0.38) | <0.001 |
|                              |                      |                      |                      |        |                         |                         |                      |        |                      |                      |                      |              |                   |                   |                      |        |
| Southeast Asia               | 1.65 (1.28, 2.07)    | 1.93 (1.53, 2.40)    | 0.54 (0.53, 0.56)    | <0.001 | 13.14 (8.36, 18.49)     | 16.30 (10.93, 22.85)    | 0.72 (0.56, 0.89)    | <0.001 | 5.06 (2.98, 7.51)    | 3.63 (2.83, 4.46)    | -1.13 (-1.27, -0.99) | <0.001       | 0.09 (0.05, 0.13) | 0.06 (0.05, 0.08) | -1.14 (-1.27, -1.00) | <0.001 |
|                              |                      |                      |                      |        |                         |                         |                      |        |                      |                      |                      |              |                   |                   |                      |        |
| Eastern Sub-Saharan Africa   | 0.83 (0.62, 1.05)    | 0.76 (0.57, 0.98)    | -0.31 (-0.47, -0.16) | <0.001 | 1.01 (0.15, 2.27)       | —                       | —                    | —      | 20.10 (8.51, 36.13)  | 10.98 (6.32, 16.46)  | -2.07 (-2.25, -1.89) | <0.001       | 0.35 (0.15, 0.64) | 0.19 (0.11, 0.29) | -2.07 (-2.25, -1.89) | <0.001 |
|                              |                      |                      |                      |        |                         |                         |                      |        |                      |                      |                      |              |                   |                   |                      |        |
| Central Latin America        | 1.29 (1.03, 1.57)    | 1.61 (1.30, 1.95)    | 0.79 (0.75, 0.84)    | <0.001 | 3.97 (0.69, 8.49)       | 3.86 (0.90, 7.96)       | -0.11 (-0.56, 0.35)  | 0.648  | 11.93 (10.55, 13.53) | 9.26 (6.96, 12.08)   | -0.81 (-1.75, 0.14)  | 0.096        | 0.21 (0.19, 0.24) | 0.16 (0.12, 0.21) | -0.81 (-1.76, 0.14)  | 0.095  |
|                              |                      |                      |                      |        |                         |                         |                      |        |                      |                      |                      |              |                   |                   |                      |        |
| Tropical Latin America       | 2.80 (2.50, 3.11)    | 2.63 (2.32, 2.98)    | -0.26 (-0.48, -0.04) | 0.021  | 20.90 (14.48, 27.85)    | 18.39 (12.97, 25.03)    | -0.50 (-0.60, -0.39) | <0.001 | 36.25 (32.84, 39.81) | 16.07 (14.22, 18.14) | -2.75 (-2.91, -2.60) | <0.001       | 0.64 (0.58, 0.70) | 0.28 (0.25, 0.32) | -2.76 (-2.91, -2.60) | <0.001 |
|                              |                      |                      |                      |        |                         |                         |                      |        |                      |                      |                      |              |                   |                   |                      |        |
| Central Sub-Saharan Africa   | 0.83 (0.54, 1.18)    | 0.76 (0.48, 1.11)    | -0.29 (-0.33, -0.24) | <0.001 | 0.18 (0.00, 0.51)       | 0.12 (0.00, 0.28)       | -1.27 (-3.76, 1.28)  | 0.326  | 14.10 (5.22, 30.34)  | 9.78 (4.53, 18.42)   | -1.28 (-1.39, -1.17) | <0.001       | 0.25 (0.09, 0.54) | 0.17 (0.08, 0.32) | -1.28 (-1.39, -1.17) | <0.001 |
|                              |                      |                      |                      |        |                         |                         |                      |        |                      |                      |                      |              |                   |                   |                      |        |
| Western Europe               | 14.75 (13.80, 15.81) | 16.22 (15.03, 17.55) | 0.34 (0.21, 0.47)    | <0.001 | 122.99 (114.32, 132.04) | 135.24 (124.68, 146.70) | 0.33 (0.10, 0.55)    | 0.005  | 10.32 (9.27, 11.55)  | 6.95 (6.28, 7.84)    | -1.38 (-1.76, -1.01) | <0.001       | 0.18 (0.16, 0.20) | 0.12 (0.11, 0.14) | -1.40 (-1.78, -1.02) | <0.001 |
|                              |                      |                      |                      |        |                         |                         |                      |        |                      |                      |                      |              |                   |                   |                      |        |



|                             |                          |                      |                      |                   |                         |                         |                        |                   |                      |                         |                      |                   |                         |                   |                      |                   |
|-----------------------------|--------------------------|----------------------|----------------------|-------------------|-------------------------|-------------------------|------------------------|-------------------|----------------------|-------------------------|----------------------|-------------------|-------------------------|-------------------|----------------------|-------------------|
| High-income North America   | 101.89                   | 104.99               | 0.06 (-0.10, 0.23)   | 0.428             | 892.07                  | 920.46                  | 0.07 (-0.11, 0.25)     | 0.452             | 15.22 (13.97, 16.86) | 11.12 (9.70, 12.84)     | -1.01 (-1.70, -0.31) | 0.005             | 0.25 (0.23, 0.27)       | 0.18 (0.16, 0.20) | -1.06 (-1.81, -0.31) | 0.006             |
|                             | (95.59, 107.91)          | (99.34, 110.38)      |                      |                   | (831.22, 953.48)        | (863.86, 977.03)        |                        |                   | (15.22, 16.86)       | (11.12, 12.84)          |                      |                   | (0.23, 0.27)            | (0.16, 0.20)      |                      |                   |
|                             | Central Asia             | 11.32 (8.20, 14.89)  | 12.55 (9.24, 16.39)  | 0.36 (0.33, 0.38) | <0.001                  | 96.72 (65.06, 136.38)   | 104.77 (70.06, 145.98) | 0.30 (0.16, 0.44) | <0.001               | 3.81 (3.29, 4.43)       | 5.64 (4.44, 7.17)    | 1.32 (0.61, 2.03) | <0.001                  | 0.07 (0.06, 0.08) | 0.10 (0.08, 0.12)    | 1.36 (0.65, 2.08) |
| Eastern Europe              | 24.91                    | 26.53                | 0.21 (0.18, 0.24)    | <0.001            | 214.84                  | 226.28                  | 0.17 (0.10, 0.24)      | <0.001            | 2.68 (2.21, 3.18)    | 5.57 (4.10, 8.13)       | 2.63 (1.89, 3.37)    | <0.001            | 0.04 (0.04, 0.05)       | 0.09 (0.07, 0.14) | 3.12 (2.46, 3.79)    | <0.001            |
|                             | (22.58, 27.50)           | (24.11, 29.02)       |                      |                   | (188.03, 243.67)        | (201.14, 253.01)        |                        |                   | (2.68, 3.18)         | (5.57, 8.13)            |                      |                   | (0.04, 0.05)            | (0.07, 0.14)      |                      |                   |
| Southern Sub-Saharan Africa | 1.55 (1.36, 1.75)        | 1.31 (1.12, 1.52)    | -0.59 (-0.67, -0.51) | <0.001            | 10.18 (5.80, 14.90)     | 8.93 (4.67, 13.94)      | -0.44 (-0.65, -0.24)   | <0.001            | 41.26 (29.80, 54.26) | 16.87 (9.94, 25.96)     | -2.88 (-4.50, -1.24) | 0.001             | 0.73 (0.53, 0.96)       | 0.30 (0.18, 0.46) | -2.88 (-4.50, -1.24) | 0.001             |
|                             | High-income Asia Pacific | 61.90 (57.31, 66.80) |                      |                   | 68.69 (63.82, 74.13)    | 0.37 (0.28, 0.46)       |                        |                   | <0.001               | 541.41 (495.43, 596.59) |                      |                   | 601.87 (549.45, 662.01) | 0.38 (0.28, 0.48) |                      |                   |
| Central Europe              | 22.31 (18.48, 26.48)     | 30.07 (25.39, 34.86) | 1.03 (0.99, 1.08)    | <0.001            | 189.74 (152.25, 231.59) | 260.34 (215.17, 310.33) | 1.10 (1.03, 1.18)      | <0.001            | 7.51 (6.35, 8.71)    | 7.56 (6.12, 9.28)       | 0.05 (-0.28, 0.38)   | 0.763             | 0.13 (0.11, 0.15)       | 0.13 (0.10, 0.16) | 0.04 (-0.29, 0.38)   | 0.802             |
|                             | Andean Latin America     | 1.18 (0.84, 1.56)    |                      |                   | 1.60 (1.19, 2.05)       | 1.05 (0.98, 1.12)       |                        |                   | <0.001               | 2.82 (0.00, 8.05)       |                      |                   | —                       | —                 |                      |                   |
| Caribbean                   | 1.68 (1.25, 2.16)        | 1.88 (1.42, 2.39)    | 0.35 (0.28, 0.42)    | <0.001            | 12.33 (5.96, 19.82)     | 10.65 (5.47, 17.45)     | -0.57 (-1.13, -0.00)   | 0.049             | 17.53 (11.24, 26.36) | 15.01 (8.91, 26.68)     | -0.49 (-0.62, -0.37) | <0.001            | 0.31 (0.20, 0.47)       | 0.26 (0.16, 0.47) | -0.49 (-0.62, -0.36) | <0.001            |
|                             | Southern Latin America   | 4.36 (3.13, 5.88)    |                      |                   | 5.87 (4.37, 7.68)       | 1.01 (0.95, 1.07)       |                        |                   | <0.001               | 36.04 (16.98, 60.15)    |                      |                   | 44.18 (23.03, 71.07)    | 0.67 (0.41, 0.94) |                      |                   |
| Oceania                     | 3.89 (2.87, 5.17)        | 3.89 (2.82, 5.15)    | -0.06 (-0.18, 0.07)  | 0.379             | 32.30 (16.11, 53.77)    | 32.08 (13.73, 56.73)    | -0.11 (-0.28, 0.06)    | 0.212             | 24.94 (11.61, 45.53) | 26.88 (12.17, 52.24)    | 0.21 (-0.10, 0.52)   | 0.176             | 0.44 (0.20, 0.80)       | 0.47 (0.21, 0.92) | 0.21 (-0.10, 0.52)   | 0.176             |
|                             | Australasia              | 6.83 (5.62, 8.31)    |                      |                   | 14.68 (11.73, 18.24)    | 2.67 (2.64, 2.71)       |                        |                   | <0.001               | 56.19 (33.90, 85.35)    |                      |                   | 126.58 (80.30, 177.26)  | 2.81 (2.45, 3.17) |                      |                   |

| Men                          |              |             |               |        |               |                |              |        |               |               |         |        |        |         |              |        |
|------------------------------|--------------|-------------|---------------|--------|---------------|----------------|--------------|--------|---------------|---------------|---------|--------|--------|---------|--------------|--------|
| Global                       | 10.22 (9.44, | 8.85 (8.04, | -0.51 (-0.58, | <0.001 | 84.77 (77.41, | 70.61 (64.21,  | -0.65        | <0.001 | 13.36 (11.58, | 10.50 (9.24,  | -0.85   | <0.001 | 0.23   | 0.18    | -0.85        | <0.001 |
|                              | 11.18)       | 9.78)       | -0.45)        |        | 92.83)        | 77.77)         | (-0.72,      |        | 15.76)        | 12.25)        | (-0.97, |        | (0.20, | (0.16,  | (-0.97,      |        |
| SDI category                 |              |             |               |        |               |                |              |        |               |               |         |        |        |         |              |        |
| High                         | 36.21        | 38.00       | 0.15 (0.06,   | 0.001  | 312.17        | 328.20         | -0.65        | 0.001  | 20.12 (18.52, | 11.89 (10.64, | -1.82   | <0.001 | 0.35   | 0.20    | -1.85        | <0.001 |
|                              | (33.74,      | (35.22,     | 0.23)         |        | (287.65,      | (301.57,       | 0.23)        |        | 21.66)        | 13.34)        | (-2.21, |        | (0.32, | (0.18,  | (-2.26,      |        |
| High-middle                  | 38.96)       | 40.80)      |               |        | 338.06)       | 357.61)        |              |        |               |               | -1.43)  |        | 0.38)  | 0.23)   | -1.44)       |        |
|                              | 11.68        | 12.89       | 0.38 (0.18,   | <0.001 | 98.48 (87.80, | 105.29 (92.17, | 0.26 (-0.01, | 0.058  | 13.15 (11.37, | 9.71 (8.66,   | -1.05   | <0.001 | 0.23   | 0.17    | -1.05        | <0.001 |
| (10.66,                      | (11.32,      | 0.57)       | 109.46)       |        | 119.23)       | 0.54)          | 15.53)       |        | 11.37)        | (-1.44,       | (0.20,  |        | (0.15, | (-1.34, |              |        |
| Middle                       | 12.93)       | 14.60)      |               |        |               |                |              |        |               |               | -0.67)  |        | 0.27)  | 0.20)   | -0.75)       |        |
|                              | 2.56 (2.22,  | 3.01 (2.56, | 0.58 (0.47,   | <0.001 | 18.82 (14.69, | 19.61 (15.89,  | 0.14 (-0.07, | 0.190  | 11.45 (9.60,  | 9.26 (7.94,   | -0.80   | <0.001 | 0.20   | 0.16    | -0.80        | <0.001 |
| 2.95)                        | 3.52)        | 0.69)       | 23.57)        |        | 23.77)        | 0.36)          | 13.37)       |        | 10.89)        | (-0.98,       | (0.17,  |        | (0.14, | (-0.98, |              |        |
| Low-middle                   | 1.37 (1.12,  | 1.57 (1.30, | 0.47 (0.40,   | <0.001 | 5.33 (3.56,   | 5.89 (4.16,    | 0.40 (0.11,  | 0.007  | 10.69 (7.78,  | 11.37 (8.70,  | 0.20    | 0.061  | 0.19   | 0.20    | 0.20 (-0.05, | 0.113  |
|                              | 1.65)        | 1.87)       | 0.55)         |        | 7.22)         | 7.80)          | 0.69)        |        | 15.32)        | 14.89)        | (-0.01, |        | (0.14, | (0.15,  | 0.44)        |        |
| Low                          |              |             |               |        |               |                |              |        |               |               | 0.41)   |        | 0.27)  | 0.26)   |              |        |
|                              | 1.05 (0.82,  | 1.16 (0.91, | 0.33 (0.27,   | <0.001 | 1.80 (0.87,   | 3.22 (1.91,    | 1.82 (0.90,  | <0.001 | 13.25 (8.02,  | 12.25 (8.45,  | -0.27   | <0.001 | 0.23   | 0.22    | -0.27        | <0.001 |
| 1.31)                        | 1.44)        | 0.39)       | 2.97)         |        | 4.83)         | 2.75)          | 21.50)       |        | 17.20)        | (-0.38,       | (0.14,  |        | (0.15, | (-0.38, |              |        |
| 21 GBD region                |              |             |               |        |               |                |              |        |               |               |         |        |        |         |              |        |
| South Asia                   | 0.81 (0.66,  | 1.05 (0.87, | 0.86 (0.82,   | <0.001 | —             | 0.02 (0.00,    | —            | —      | 9.42 (6.28,   | 10.46 (7.62,  | 0.35    | 0.011  | 0.17   | 0.18    | 0.35 (0.08,  | 0.010  |
|                              | 0.97)        | 1.23)       | 0.89)         |        |               | 0.05)          |              |        | 14.47)        | 14.22)        | (0.08,  |        | (0.11, | (0.13,  | 0.61)        |        |
| East Asia                    |              |             |               |        |               |                |              |        |               |               | 0.61)   |        | 0.26)  | 0.25)   |              |        |
|                              | 4.30 (3.91,  | 5.20 (4.72, | 0.64 (0.55,   | <0.001 | 36.48 (30.28, | 37.99 (31.86,  | 0.06 (-0.18, | 0.619  | 7.15 (5.31,   | 5.21 (4.16,   | -1.15   | <0.001 | 0.13   | 0.09    | -1.16        | <0.001 |
| 4.75)                        | 5.77)        | 0.74)       | 43.18)        |        | 44.22)        | 0.31)          | 9.56)        |        | 6.35)         | (-1.70,       | (0.09,  |        | (0.07, | (-1.70, |              |        |
| North Africa and Middle East |              |             |               |        |               |                |              |        |               |               | -0.60)  |        | 0.17)  | 0.11)   | -0.61)       |        |
|                              | 2.77 (2.10,  | 3.34 (2.59, | 0.65 (0.52,   | <0.001 | 20.40 (12.97, | 24.61 (16.85,  | 0.62 (0.42,  | <0.001 | 22.33 (15.18, | 15.87 (11.96, | -1.16   | <0.001 | 0.39   | 0.28    | -1.16        | <0.001 |
| 3.53)                        | 4.16)        | 0.77)       | 29.82)        |        | 33.29)        | 0.83)          | 32.38)       |        | 20.45)        | (-1.29,       | (0.27,  |        | (0.21, | (-1.30, |              |        |
| Western Sub-Saharan Africa   |              |             |               |        |               |                |              |        |               |               | -1.03)  |        | 0.57)  | 0.36)   | -1.03)       |        |
|                              | 1.40 (1.13,  | 1.55 (1.25, | 0.34 (0.27,   | <0.001 | 2.27 (0.81,   | 9.91 (6.70,    | 4.50 (3.17,  | <0.001 | 10.97 (6.82,  | 11.49 (8.18,  | 0.18    | 0.001  | 0.19   | 0.20    | 0.18 (0.07,  | 0.001  |
| 1.71)                        | 1.92)        | 0.42)       | 4.29)         |        | 13.54)        | 5.84)          | 16.82)       |        | 15.89)        | (0.07,        | (0.12,  |        | (0.14, | 0.28)   |              |        |
| 234                          |              |             |               |        |               |                |              |        |               |               |         |        |        |         |              |        |

|                             | 2010        | 2011        | 2012          | 2013   | 2014           | 2015           | 2016         | 2017   | 2018          | 2019          | 2020    | 2021  | 2022  | 2023         | 2024   |
|-----------------------------|-------------|-------------|---------------|--------|----------------|----------------|--------------|--------|---------------|---------------|---------|-------|-------|--------------|--------|
| Southeast Asia              | 1.43 (1.12, | 1.70 (1.34, | 0.60 (0.58,   | <0.001 | 10.90 (6.74,   | 14.05 (9.16,   | 0.85 (0.64,  | <0.001 | 5.09 (3.89,   | 5.04 (4.02,   | 0.00    | 0.09  | 0.09  | 0.00 (-0.33, | 0.990  |
|                             | 1.83)       | 2.14)       | 0.62)         |        | 15.73)         | 19.81)         | 1.06)        |        | 7.20)         | 6.82)         | (-0.33, | 0.13) | 0.12) | 0.33)        |        |
| Eastern Sub-Saharan Africa  | 1.00 (0.77, | 1.01 (0.78, | -0.01 (-0.14, | 0.917  | 1.32 (0.22,    | 0.72 (0.00,    | -2.31        | <0.001 | 19.02 (11.01, | 13.94 (9.74,  | -1.07   | 0.34  | 0.25  | -1.07        | <0.001 |
|                             | 1.26)       | 1.27)       | 0.13)         |        | 2.74)          | 2.08)          | (-2.99,      |        | 30.01)        | 19.20)        | (-1.32, | 0.19, | 0.17, | (-1.32,      |        |
| Central Latin America       | 1.01 (0.78, | 2.21 (1.70, | 2.74 (2.59,   | <0.001 | —              | 8.29 (4.92,    | —            | —      | 16.59 (14.24, | 13.83 (10.96, | -0.61   | 0.29  | 0.24  | -0.62        | 0.005  |
|                             | 1.28)       | 2.80)       | 2.90)         |        |                | 12.35)         |              |        | 19.22)        | 17.72)        | (-1.04, | 0.25, | 0.19, | (-1.04,      |        |
| Tropical Latin America      | 1.97 (1.64, | 2.15 (1.75, | 0.29 (0.15,   | <0.001 | —              | 0.48 (0.15,    | —            | —      | 44.80 (40.05, | 19.80 (17.57, | -2.72   | 0.79  | 0.35  | -2.73        | <0.001 |
|                             | 2.35)       | 2.63)       | 0.43)         |        |                | 0.94)          |              |        | 49.81)        | 22.35)        | (-3.02, | 0.71, | 0.31, | (-3.02,      |        |
| Central Sub-Saharan Africa  | 0.99 (0.68, | 0.95 (0.64, | -0.17 (-0.23, | <0.001 | 0.23 (0.00,    | 0.29 (0.07,    | 0.53 (-0.25, | 0.183  | 13.21 (5.39,  | 11.12 (5.68,  | -0.62   | 0.23  | 0.20  | -0.62        | <0.001 |
|                             | 1.35)       | 1.33)       | -0.10)        |        | 0.60)          | 0.63)          | 1.32)        |        | 25.90)        | 20.20)        | (-0.87, | 0.09, | 0.10, | (-0.87,      |        |
| Western Europe              | 9.74 (9.05, | 12.37       | 0.83 (0.69,   | <0.001 | 79.76 (72.30,  | 101.48 (91.31, | 0.82 (0.53,  | <0.001 | 21.87 (19.10, | 13.23 (11.78, | -1.77   | 0.38  | 0.23  | -1.78        | <0.001 |
|                             | 10.52)      | (11.22,     | 0.97)         |        | 87.33)         | 112.46)        | 1.11)        |        | 24.88)        | 14.92)        | (-2.15, | 0.34, | 0.21, | (-2.16,      |        |
| High-income North America   | 60.20       | 63.71       | 0.15 (0.05,   | 0.003  | 521.69         | 553.51         | 0.16 (0.06,  | 0.003  | 27.43 (25.05, | 13.34 (10.48, | -2.49   | 0.48  | 0.23  | -2.56        | <0.001 |
|                             | (56.48,     | (59.83,     | 0.26)         |        | (481.40,       | (511.72,       | 0.27)        |        | 29.76)        | 15.56)        | (-3.26, | 0.43, | 0.18, | (-3.37,      |        |
| Central Asia                | 16.81       | 19.95       | 0.60 (0.58,   | <0.001 | 144.12 (97.79, | 172.07         | 0.63 (0.55,  | <0.001 | 4.85 (3.99,   | 7.66 (6.12,   | 1.45    | 0.08  | 0.13  | 1.49 (0.87,  | <0.001 |
|                             | (12.18,     | (15.05,     | 0.62)         |        | 195.78)        | (124.95,       | 0.71)        |        | 6.16)         | 9.55)         | (0.84,  | 0.07, | 0.11, | 2.11)        |        |
| Eastern Europe              | 24.82       | 42.07       | 1.82 (1.77,   | <0.001 | 213.55         | 363.78         | 1.85 (1.78,  | <0.001 | 5.91 (4.90,   | 15.25 (12.15, | 3.33    | 0.10  | 0.26  | 3.41 (2.77,  | <0.001 |
|                             | (22.64,     | (36.07,     | 1.88)         |        | (188.12,       | (308.29,       | 1.92)        |        | 7.13)         | 20.92)        | (2.71,  | 0.08, | 0.21, | 4.06)        |        |
| Southern Sub-Saharan Africa | 27.24)      | 49.08)      |               |        | 239.56)        | 423.72)        |              |        | 3.97)         |               | 3.97)   | 0.12) | 0.36) |              |        |
|                             | 2.12 (1.77, | 6.69 (4.92, | 4.04 (3.75,   | <0.001 | 9.35 (5.14,    | 44.62 (28.41,  | 5.83 (4.94,  | <0.001 | 43.25 (31.41, | 23.63 (16.99, | -2.23   | 0.76  | 0.42  | -2.24        | 0.001  |
| High-income Asia Pacific    | 2.54)       | 8.78)       | 4.32)         |        | 14.73)         | 64.25)         | 6.73)        |        | 56.95)        | 35.12)        | (-3.53, | 0.55, | 0.30, | (-3.54,      |        |
|                             | 60.68       | 74.53       | 0.74 (0.62,   | <0.001 | 527.52         | 649.12         | 0.75 (0.66,  | <0.001 | 12.05 (10.65, | 5.94 (5.03,   | -2.42   | 0.20  | 0.10  | -2.57        | <0.001 |
|                             | (55.14,     | (67.94,     | 0.86)         |        | (470.10,       | (577.84,       | 0.84)        |        | 13.92)        | 7.29)         | (-2.76, | 0.18, | 0.08, | (-3.03,      |        |
|                             | 66.80)      | 82.20)      |               |        | 591.45)        | 728.18)        |              |        |               |               | -2.07)  | 0.23) | 0.12) | -2.10)       |        |

|                        | 2018        | 2019        | 2020          | 2021   | 2022          | 2023          | 2024        | 2025   | 2026          | 2027          | 2028    | 2029   | 2030   | 2031        | 2032    |        |
|------------------------|-------------|-------------|---------------|--------|---------------|---------------|-------------|--------|---------------|---------------|---------|--------|--------|-------------|---------|--------|
| Central Europe         | 20.38       | 33.73       | 1.76 (1.68,   |        | 174.94        | 290.67        | 1.78 (1.73, |        | 14.37 (12.07, | 16.99 (14.32, | 0.58    | 0.25   | 0.30   | 0.58 (0.38, |         |        |
|                        | (16.84,     | (28.37,     | 1.83)         | <0.001 | (140.98,      | (236.42,      | 1.82)       | <0.001 | 16.83)        | 19.88)        | (0.39,  | <0.001 | (0.21, | (0.25,      | 0.78)   | <0.001 |
|                        | 24.36)      | 39.85)      |               |        | 214.17)       | 352.02)       |             |        |               |               | 0.78)   | 0.29)  | 0.35)  |             |         |        |
| Andean Latin America   | 0.89 (0.61, | 2.85 (2.13, | 4.12 (3.94,   |        |               | 16.27 (5.42,  |             |        | 10.22 (7.00,  | 9.48 (6.34,   | -0.34   | 0.18   | 0.17   | -0.34       |         |        |
|                        | 1.21)       | 3.67)       | 4.30)         | <0.001 | —             | 28.44)        | —           | —      | 14.49)        | 13.55)        | (-0.64, | 0.032  | (0.12, | (0.11,      | (-0.65, | 0.029  |
|                        |             |             |               |        |               |               |             |        |               |               | -0.03)  | 0.26)  | 0.24)  | -0.04)      |         |        |
| Caribbean              | 2.41 (1.88, | 3.66 (2.90, | 1.44 (1.39,   |        | 15.45 (7.89,  | 24.89 (15.30, | 1.61 (1.21, |        | 32.91 (25.92, | 25.65 (18.38, | -0.90   | 0.58   | 0.45   | -0.90       |         |        |
|                        | 3.00)       | 4.54)       | 1.48)         | <0.001 | 25.06)        | 35.41)        | 2.02)       | <0.001 | 40.40)        | 35.88)        | (-1.08, | <0.001 | (0.46, | (0.32,      | (-1.08, | <0.001 |
|                        |             |             |               |        |               |               |             |        |               |               | -0.71)  | 0.71)  | 0.63)  | -0.72)      |         |        |
| Southern Latin America | 3.73 (2.68, | 7.70 (6.00, | 2.51 (2.39,   |        | 29.08 (12.71, | 66.40 (38.58, | 2.97 (2.41, |        | 15.76 (12.10, | 12.99 (10.00, | -0.65   | 0.28   | 0.23   | -0.66       |         |        |
|                        | 5.04)       | 9.54)       | 2.63)         | <0.001 | 49.44)        | 100.09)       | 3.53)       | <0.001 | 20.21)        | 16.77)        | (-1.03, | 0.001  | (0.21, | (0.18,      | (-1.04, | 0.001  |
|                        |             |             |               |        |               |               |             |        |               |               | -0.26)  | 0.36)  | 0.29)  | -0.27)      |         |        |
| Oceania                | 2.26 (1.61, | 2.29 (1.61, | 0.01 (-0.15,  |        | 17.36 (5.15,  | 17.21 (3.53,  | -0.12       |        | 8.31 (4.33,   | 8.09 (4.16,   | -0.13   | 0.15   | 0.14   | -0.13       |         |        |
|                        | 3.08)       | 3.14)       | 0.16)         | 0.942  | 33.51)        | 34.63)        | (-0.48,     | 0.493  | 16.03)        | 15.29)        | (-0.22, | 0.014  | (0.08, | (0.07,      | (-0.23, | 0.014  |
|                        |             |             |               |        |               |               | 0.23)       |        |               |               | -0.03)  | 0.28)  | 0.27)  | -0.03)      |         |        |
| Australasia            | 5.93 (4.81, | 18.97       | 4.08 (3.95,   |        | 48.43 (25.08, | 162.26        | 4.23 (3.90, |        | 15.97 (12.09, | 11.10 (7.76,  | -1.20   | 0.28   | 0.19   | -1.23       |         |        |
|                        | 7.39)       | (14.69,     | 4.22)         | <0.001 | 76.39)        | (106.22,      | 4.56)       | <0.001 | 20.07)        | 15.22)        | (-1.81, | <0.001 | (0.21, | (0.13,      | (-1.84, | <0.001 |
|                        |             | 23.78)      |               |        |               | 224.99)       |             |        |               |               | -0.58)  | 0.35)  | 0.27)  | -0.61)      |         |        |
| <b>35-39 years</b>     |             |             |               |        |               |               |             |        |               |               |         |        |        |             |         |        |
| <b>Women</b>           |             |             |               |        |               |               |             |        |               |               |         |        |        |             |         |        |
| Global                 | 18.40       | 14.12       | -0.90 (-0.99, |        | 203.03        | 154.06        | -0.95       |        | 14.14 (10.24, | 11.42 (9.06,  | -0.72   | 0.27   | 0.22   | -0.70       |         |        |
|                        | (17.15,     | (13.12,     | -0.82)        | <0.001 | (189.38,      | (142.97,      | (-1.06,     | <0.001 | 18.31)        | 14.01)        | (-0.87, | <0.001 | (0.19, | (0.17,      | (-0.86, | <0.001 |
|                        | 19.74)      | 15.16)      |               |        | 218.62)       | 165.62)       | -0.84)      |        |               |               | -0.56)  | 0.35)  | 0.27)  | -0.55)      |         |        |
| <b>SDI category</b>    |             |             |               |        |               |               |             |        |               |               |         |        |        |             |         |        |
| High                   | 69.39       | 69.20       | -0.03 (-0.15, |        | 778.52        | 777.78        | -0.03       |        | 14.48 (13.26, | 11.63 (10.11, | -0.77   | 0.26   | 0.21   | -0.80       |         |        |
|                        | (65.22,     | (65.17,     | 0.09)         | 0.630  | (731.61,      | (731.26,      | (-0.16,     | 0.708  | 16.16)        | 13.77)        | (-1.06, | <0.001 | (0.24, | (0.18,      | (-1.17, | <0.001 |
|                        | 73.71)      | 73.55)      |               |        | 831.35)       | 826.36)       | 0.11)       |        |               |               | -0.48)  | 0.28)  | 0.24)  | -0.43)      |         |        |
| High-middle            | 18.41       | 16.88       | -0.29 (-0.37, |        | 202.74        | 184.47        | -0.32       |        | 11.97 (9.51,  | 8.32 (7.29,   | -1.22   | 0.23   | 0.16   | -1.23       |         |        |
|                        | (16.88,     | (15.47,     | -0.21)        | <0.001 | (184.24,      | (166.75,      | (-0.41,     | <0.001 | 14.52)        | 9.53)         | (-1.58, | <0.001 | (0.18, | (0.14,      | (-1.59, | <0.001 |
|                        | 20.22)      | 18.45)      |               |        | 225.16)       | 204.00)       | -0.24)      |        |               |               | -0.87)  | 0.28)  | 0.18)  | -0.87)      |         |        |
| Middle                 | 3.71 (3.25, | 3.47 (2.99, | -0.28 (-0.49, |        | 38.90 (31.38, | 34.80 (28.90, | -0.44       |        | 13.84 (9.99,  | 10.32 (8.63,  | -0.99   | 0.27   | 0.20   | -0.99       |         |        |
|                        | 4.24)       | 3.99)       | -0.06)        | 0.013  | 46.64)        | 41.88)        | (-0.74,     | 0.004  | 18.22)        | 12.26)        | (-1.16, | <0.001 | (0.19, | (0.17,      | (-1.16, | <0.001 |
|                        |             |             |               |        |               |               | -0.14)      |        |               |               | -0.82)  | 0.35)  | 0.24)  | -0.82)      |         |        |
| 236                    |             |             |               |        |               |               |             |        |               |               |         |        |        |             |         |        |

|                              |                   |                   |                      |        |                      |                       |                      |        |                      |                      |                      |        |                   |                   |                      |        |
|------------------------------|-------------------|-------------------|----------------------|--------|----------------------|-----------------------|----------------------|--------|----------------------|----------------------|----------------------|--------|-------------------|-------------------|----------------------|--------|
| Low-middle                   | 1.72 (1.41, 2.05) | 1.76 (1.45, 2.11) | 0.06 (-0.14, 0.27)   | 0.559  | 13.37 (9.95, 17.14)  | 13.70 (10.46, 17.49)  | -0.12 (-0.61, 0.36)  | 0.617  | 14.31 (7.49, 22.66)  | 13.16 (8.82, 18.11)  | -0.27 (-0.50, -0.04) | 0.019  | 0.28 (0.14, 0.44) | 0.25 (0.17, 0.35) | -0.27 (-0.50, -0.04) | 0.020  |
|                              | 1.09 (0.83, 1.38) | 1.17 (0.89, 1.48) | 0.24 (0.17, 0.30)    | <0.001 | 4.85 (3.21, 6.85)    | 6.05 (3.92, 8.60)     | 0.72 (0.05, 1.40)    | 0.036  | 20.96 (8.94, 37.43)  | 16.27 (9.06, 25.51)  | -0.87 (-1.03, -0.72) | <0.001 | 0.40 (0.17, 0.72) | 0.31 (0.17, 0.49) | -0.87 (-1.02, -0.72) | <0.001 |
| <b>21 GBD region</b>         |                   |                   |                      |        |                      |                       |                      |        |                      |                      |                      |        |                   |                   |                      |        |
| South Asia                   | 0.76 (0.61, 0.91) | 0.96 (0.79, 1.13) | 0.77 (0.64, 0.91)    | <0.001 | —                    | 3.97 (2.63, 5.47)     | —                    | —      | 12.00 (4.98, 20.10)  | 11.05 (6.71, 15.48)  | -0.37 (-0.95, 0.22)  | 0.219  | 0.23 (0.10, 0.39) | 0.21 (0.13, 0.30) | -0.36 (-0.94, 0.22)  | 0.220  |
|                              | 7.02 (6.44, 7.73) | 8.95 (8.24, 9.78) | 0.86 (0.75, 0.98)    | <0.001 | 76.55 (66.14, 87.84) | 94.54 (83.64, 106.32) | 0.74 (0.59, 0.90)    | <0.001 | 6.09 (3.39, 8.97)    | 3.02 (2.32, 3.89)    | -2.39 (-2.63, -2.15) | <0.001 | 0.12 (0.06, 0.17) | 0.06 (0.04, 0.07) | -2.46 (-2.70, -2.22) | <0.001 |
| North Africa and Middle East | 4.63 (3.46, 5.99) | 5.06 (3.88, 6.46) | 0.32 (0.21, 0.42)    | <0.001 | 48.85 (32.96, 66.76) | 52.95 (37.84, 71.27)  | 0.26 (0.13, 0.40)    | <0.001 | 51.00 (29.01, 75.71) | 32.20 (22.97, 43.60) | -1.56 (-1.66, -1.46) | <0.001 | 0.98 (0.56, 1.46) | 0.62 (0.44, 0.84) | -1.56 (-1.67, -1.46) | <0.001 |
|                              | 1.10 (0.85, 1.40) | 1.19 (0.92, 1.49) | 0.24 (0.16, 0.33)    | <0.001 | 9.82 (6.57, 13.56)   | 11.56 (7.87, 15.78)   | 0.53 (0.37, 0.69)    | <0.001 | 20.85 (8.19, 43.31)  | 17.16 (9.28, 28.47)  | -0.68 (-0.84, -0.51) | <0.001 | 0.40 (0.16, 0.84) | 0.33 (0.18, 0.55) | -0.68 (-0.85, -0.51) | <0.001 |
| Southeast Asia               | 2.12 (1.64, 2.66) | 2.48 (1.97, 3.08) | 0.55 (0.53, 0.57)    | <0.001 | 22.79 (15.88, 30.90) | 26.78 (19.08, 36.61)  | 0.55 (0.41, 0.69)    | <0.001 | 6.43 (3.94, 9.14)    | 4.91 (3.84, 6.06)    | -0.92 (-1.05, -0.79) | <0.001 | 0.12 (0.08, 0.18) | 0.09 (0.07, 0.12) | -0.93 (-1.06, -0.79) | <0.001 |
|                              | 1.05 (0.80, 1.34) | 0.98 (0.73, 1.26) | -0.25 (-0.35, -0.15) | <0.001 | 4.39 (2.58, 6.75)    | 4.84 (2.47, 7.93)     | 0.62 (-1.37, 2.65)   | 0.542  | 25.51 (11.39, 45.32) | 14.24 (8.73, 21.32)  | -1.99 (-2.08, -1.90) | <0.001 | 0.49 (0.22, 0.88) | 0.27 (0.17, 0.41) | -1.99 (-2.08, -1.90) | <0.001 |
| Central Latin America        | 1.65 (1.33, 2.02) | 2.08 (1.68, 2.53) | 0.81 (0.75, 0.86)    | <0.001 | 15.90 (10.08, 23.01) | 16.85 (11.43, 23.22)  | 0.20 (0.03, 0.38)    | 0.024  | 18.48 (16.30, 20.65) | 13.16 (9.98, 17.14)  | -1.14 (-1.53, -0.74) | <0.001 | 0.36 (0.31, 0.40) | 0.25 (0.19, 0.33) | -1.14 (-1.53, -0.75) | <0.001 |
|                              | 3.61 (3.21, 4.00) | 3.39 (2.99, 3.84) | -0.26 (-0.47, -0.04) | 0.023  | 34.01 (25.53, 44.52) | 29.88 (21.96, 37.84)  | -0.49 (-0.59, -0.39) | <0.001 | 47.99 (43.84, 52.81) | 22.58 (20.04, 25.40) | -2.60 (-2.94, -2.25) | <0.001 | 0.93 (0.85, 1.02) | 0.44 (0.39, 0.49) | -2.60 (-2.94, -2.26) | <0.001 |
| Central Sub-Saharan Africa   | 1.06 (0.69, 1.52) | 0.98 (0.62, 1.43) | -0.30 (-0.41, -0.20) | <0.001 | 3.48 (0.65, 7.57)    | 3.92 (0.75, 8.59)     | 0.42 (0.01, 0.82)    | 0.044  | 18.42 (7.33, 37.33)  | 13.56 (6.70, 24.96)  | -1.11 (-1.23, -1.11) | <0.001 | 0.36 (0.14, 0.13) | 0.26 (0.13, 0.13) | -1.11 (-1.23, -1.11) | <0.001 |
| 237                          |                   |                   |                      |        |                      |                       |                      |        |                      |                      |                      |        |                   |                   |                      |        |

| Region                      |                   | GDP (USD Bn)      |                      | Population (Mn) |                      | GDP per Capita (USD)  |                      | Growth Rate (%) |                      | Inflation Rate (%)   |                | Unemployment Rate (%) |              | Trade Balance (USD Bn) |                   |
|-----------------------------|-------------------|-------------------|----------------------|-----------------|----------------------|-----------------------|----------------------|-----------------|----------------------|----------------------|----------------|-----------------------|--------------|------------------------|-------------------|
| Region                      | 2020              | 2021              | 2020                 | 2021            | 2020                 | 2021                  | 2020                 | 2021            | 2020                 | 2021                 | 2020           | 2021                  | 2020         | 2021                   | 2020              |
| Western Europe              | 18.66             | 20.97             | 0.40 (0.29, 0.51)    | <0.001          | 206.38               | 233.09                | 0.42 (0.28, 0.56)    | <0.001          | 12.06 (10.71, 13.43) | 8.18 (7.43, 9.13)    | -1.34          | <0.001                | 0.72         | 0.48                   | -1.00             |
|                             | (17.46, 19.99)    | (19.44, 22.68)    |                      |                 | (191.98, 222.38)     | (213.94, 253.62)      |                      |                 |                      |                      | (-1.49, -1.20) |                       | (0.20, 0.25) | (0.14, 0.17)           | (-1.53, -1.24)    |
| High-income North America   | 129.93            | 133.44            | 0.05 (-0.11, 0.21)   | 0.547           | 1463.93              | 1505.17               | 0.06 (-0.11, 0.22)   | 0.518           | 19.68 (17.72, 22.30) | 14.24 (12.55, 16.90) | -1.14          | <0.001                | 0.34         | 0.24                   | -1.25             |
|                             | (121.96, 137.55)  | (126.29, 140.23)  |                      |                 | (1370.00, 1562.33)   | (1419.39, 1588.76)    |                      |                 |                      |                      | (-1.72, -0.56) |                       | (0.32, 0.37) | (0.22, 0.27)           | (-1.84, -0.64)    |
| Central Asia                | 14.58             | 16.19             | 0.36 (0.34, 0.39)    | <0.001          | 159.22               | 175.14                | 0.31 (0.19, 0.43)    | <0.001          | 3.65 (3.06, 4.33)    | 5.77 (4.46, 7.30)    | 1.64           | <0.001                | 0.07         | 0.11                   | 1.74 (1.09, 2.38) |
|                             | (10.58, 19.16)    | (11.93, 21.13)    |                      |                 | (110.46, 222.14)     | (123.67, 238.00)      |                      |                 |                      |                      | (1.03, 2.25)   |                       | (0.06, 0.08) | (0.08, 0.14)           |                   |
| Eastern Europe              | 31.97             | 34.03             | 0.21 (0.19, 0.23)    | <0.001          | 351.88               | 374.43                | 0.21 (0.18, 0.24)    | <0.001          | 3.40 (2.78, 4.25)    | 6.94 (5.17, 9.80)    | 2.59           | <0.001                | 0.05         | 0.12                   | 2.99 (1.97, 4.02) |
|                             | (29.00, 35.29)    | (30.91, 37.20)    |                      |                 | (311.78, 395.51)     | (334.37, 416.51)      |                      |                 |                      |                      | (1.70, 3.49)   |                       | (0.05, 0.06) | (0.09, 0.18)           |                   |
| Southern Sub-Saharan Africa | 1.99 (1.75, 2.24) | 1.69 (1.44, 1.96) | -0.59 (-0.67, -0.52) | <0.001          | 19.44 (12.90, 26.67) | 16.81 (10.66, 23.87)  | -0.50 (-0.67, -0.33) | <0.001          | 41.03 (30.89, 52.78) | 17.97 (11.25, 26.48) | -2.76          | <0.001                | 0.79         | 0.35                   | -2.77             |
|                             |                   |                   |                      |                 |                      |                       |                      |                 |                      |                      | (-3.84, -1.68) |                       | (0.60, 1.02) | (0.22, 0.51)           | (-3.84, -1.68)    |
| High-income Asia Pacific    | 85.71             | 86.28             | 0.02 (-0.06, 0.10)   | 0.605           | 961.63               | 971.44                | 0.03 (-0.04, 0.11)   | 0.389           | 11.07 (9.77, 12.99)  | 4.89 (3.90, 6.74)    | -2.86          | <0.001                | 0.19         | 0.07                   | -3.32             |
|                             | (80.11, 92.10)    | (80.12, 93.21)    |                      |                 | (888.80, 1040.68)    | (890.77, 1061.29)     |                      |                 |                      |                      | (-3.15, -2.58) |                       | (0.17, 0.21) | (0.06, 0.09)           | (-3.50, -3.15)    |
| Central Europe              | 28.68             | 38.64             | 1.03 (0.99, 1.07)    | <0.001          | 315.18               | 425.68                | 1.04 (0.98, 1.10)    | <0.001          | 12.50 (10.74, 14.47) | 11.84 (9.50, 14.50)  | -0.19          | 0.408                 | 0.23         | 0.22                   | -0.21             |
|                             | (23.78, 34.00)    | (32.68, 44.74)    |                      |                 | (258.08, 376.37)     | (353.94, 505.83)      |                      |                 |                      |                      | (-0.63, 0.26)  |                       | (0.20, 0.27) | (0.17, 0.27)           | (-0.68, 0.27)     |
| Andean Latin America        | 1.52 (1.09, 2.00) | 2.06 (1.52, 2.64) | 1.04 (0.94, 1.15)    | <0.001          | 14.61 (5.00, 26.80)  | 18.19 (7.22, 31.83)   | 0.78 (-0.67, 2.25)   | 0.292           | 14.59 (8.73, 21.23)  | 9.45 (6.42, 13.34)   | -1.51          | <0.001                | 0.28         | 0.18                   | -1.51             |
|                             |                   |                   |                      |                 |                      |                       |                      |                 |                      |                      | (-2.24, -0.77) |                       | (0.17, 0.41) | (0.12, 0.26)           | (-2.25, -0.77)    |
| Caribbean                   | 2.19 (1.63, 2.80) | 2.47 (1.87, 3.12) | 0.39 (0.33, 0.46)    | <0.001          | 21.65 (12.02, 33.96) | 22.49 (13.03, 34.20)  | 0.11 (-0.00, 0.23)   | 0.055           | 20.46 (13.22, 31.45) | 18.58 (11.22, 31.82) | -0.29          | 0.024                 | 0.40         | 0.36                   | -0.29             |
|                             |                   |                   |                      |                 |                      |                       |                      |                 |                      |                      | (-0.55, -0.04) |                       | (0.25, 0.61) | (0.22, 0.62)           | (-0.55, -0.04)    |
| Southern Latin America      | 5.60 (4.02, 7.54) | 7.52 (5.60, 9.85) | 1.02 (0.99, 1.05)    | <0.001          | 59.78 (32.00, 96.05) | 81.68 (48.36, 119.65) | 1.12 (0.71, 1.53)    | <0.001          | 11.70 (8.87, 14.87)  | 8.46 (6.72, 10.62)   | -1.11          | <0.001                | 0.22         | 0.16                   | -1.13             |
|                             |                   |                   |                      |                 |                      |                       |                      |                 |                      |                      | (-1.68, -0.54) |                       | (0.17, 0.29) | (0.13, 0.20)           | (-1.71, -0.56)    |
| Oceania                     | 5.01 (3.69, 6.66) | 5.02 (3.65, 6.65) | -0.01 (-0.06, 0.03)  | 0.631           | 52.68 (27.66, 83.64) | 52.83 (25.95, 83.58)  | -0.03 (-0.16, 0.10)  | 0.681           | 14.00 (6.68, 25.29)  | 15.34 (6.90, 28.73)  | 0.28           | 0.005                 | 0.27         | 0.29                   | 0.28 (0.09, 0.48) |
|                             |                   |                   |                      |                 |                      |                       |                      |                 |                      |                      | (0.08, 0.08)   |                       | (0.13, 0.13) | (0.13, 0.13)           |                   |



|                             | Mean                 | SD                   | CI                   | P      | Mean                    | SD                      | CI                   | P      | Mean                 | SD                   | CI                   | P      | Mean              | SD                | CI                   | P      |
|-----------------------------|----------------------|----------------------|----------------------|--------|-------------------------|-------------------------|----------------------|--------|----------------------|----------------------|----------------------|--------|-------------------|-------------------|----------------------|--------|
|                             |                      |                      |                      |        |                         |                         |                      |        |                      |                      |                      |        |                   |                   |                      |        |
| Western Sub-Saharan Africa  | 1.80 (1.46, 2.20)    | 2.00 (1.60, 2.47)    | 0.35 (0.27, 0.43)    | <0.001 | 15.86 (11.15, 21.09)    | 17.45 (12.45, 23.50)    | 0.32 (0.16, 0.48)    | <0.001 | 14.28 (9.10, 21.41)  | 14.41 (10.22, 19.43) | 0.04 (-0.05, 0.12)   | 0.422  | 1.05 (0.18, 0.41) | 0.60 (0.20, 0.38) | -1.20 (-0.05, 0.12)  | 0.439  |
| Southeast Asia              | 1.84 (1.44, 2.35)    | 2.20 (1.74, 2.76)    | 0.60 (0.58, 0.62)    | <0.001 | 19.32 (13.36, 26.59)    | 23.18 (16.15, 31.39)    | 0.63 (0.57, 0.69)    | <0.001 | 8.28 (6.49, 12.37)   | 8.14 (6.30, 12.98)   | -0.04 (-0.26, 0.19)  | 0.759  | 0.16 (0.12, 0.24) | 0.16 (0.12, 0.25) | -0.04 (-0.26, 0.19)  | 0.750  |
| Eastern Sub-Saharan Africa  | 1.27 (0.99, 1.59)    | 1.30 (1.00, 1.63)    | 0.03 (-0.04, 0.10)   | 0.477  | 6.15 (3.47, 9.67)       | 7.41 (4.03, 11.39)      | 0.59 (0.13, 1.05)    | 0.011  | 27.71 (15.88, 43.28) | 20.14 (14.20, 28.30) | -1.10 (-1.29, -0.91) | <0.001 | 0.54 (0.31, 0.84) | 0.39 (0.27, 0.55) | -1.10 (-1.29, -0.91) | <0.001 |
| Central Latin America       | 1.30 (0.99, 1.64)    | 2.85 (2.19, 3.62)    | 2.77 (2.62, 2.92)    | <0.001 | 0.18 (0.00, 0.48)       | 16.53 (10.28, 23.38)    | 15.17 (8.53, 22.22)  | <0.001 | 22.68 (19.74, 25.87) | 17.91 (14.05, 22.45) | -0.74 (-1.00, -0.48) | <0.001 | 0.44 (0.38, 0.50) | 0.35 (0.27, 0.43) | -0.74 (-1.01, -0.48) | <0.001 |
| Tropical Latin America      | 2.53 (2.10, 3.02)    | 2.77 (2.25, 3.38)    | 0.30 (0.16, 0.43)    | <0.001 | 15.26 (10.16, 21.60)    | 22.97 (15.96, 31.58)    | 1.31 (0.95, 1.68)    | <0.001 | 57.52 (51.63, 63.99) | 26.45 (23.47, 30.16) | -2.63 (-2.99, -2.28) | <0.001 | 1.11 (1.00, 1.24) | 0.51 (0.45, 0.58) | -2.64 (-2.99, -2.28) | <0.001 |
| Central Sub-Saharan Africa  | 1.28 (0.87, 1.74)    | 1.22 (0.83, 1.70)    | -0.18 (-0.24, -0.11) | <0.001 | 10.87 (1.90, 23.19)     | 3.81 (0.75, 7.79)       | -3.22 (-4.30, -2.13) | <0.001 | 19.97 (8.70, 38.03)  | 17.30 (9.27, 30.64)  | -0.53 (-0.78, -0.28) | <0.001 | 0.39 (0.17, 0.74) | 0.33 (0.18, 0.59) | -0.53 (-0.78, -0.28) | <0.001 |
| Western Europe              | 12.42 (11.54, 13.42) | 16.05 (14.57, 17.67) | 0.88 (0.73, 1.03)    | <0.001 | 134.20 (123.34, 146.14) | 174.31 (157.13, 193.20) | 0.90 (0.66, 1.14)    | <0.001 | 27.10 (24.11, 30.58) | 16.49 (14.67, 18.87) | -1.74 (-2.04, -1.43) | <0.001 | 0.52 (0.46, 0.59) | 0.32 (0.28, 0.36) | -1.75 (-2.07, -1.44) | <0.001 |
| High-income North America   | 76.89 (72.14, 81.76) | 81.21 (76.28, 85.84) | 0.14 (0.05, 0.24)    | 0.004  | 857.42 (795.34, 922.85) | 906.20 (842.33, 970.17) | 0.14 (0.04, 0.24)    | 0.006  | 40.48 (37.55, 43.78) | 18.69 (15.90, 21.33) | -2.68 (-3.22, -2.13) | <0.001 | 0.76 (0.71, 0.82) | 0.34 (0.29, 0.39) | -2.78 (-3.34, -2.22) | <0.001 |
| Central Asia                | 21.63 (15.67, 28.61) | 25.77 (19.47, 33.38) | 0.61 (0.57, 0.65)    | <0.001 | 235.70 (166.37, 318.98) | 282.83 (206.38, 370.91) | 0.64 (0.55, 0.73)    | <0.001 | 6.71 (5.53, 8.42)    | 10.79 (8.49, 13.38)  | 1.61 (1.04, 2.17)    | <0.001 | 0.12 (0.10, 0.15) | 0.20 (0.16, 0.25) | 1.68 (1.08, 2.27)    | <0.001 |
| Eastern Europe              | 31.87 (29.07, 34.95) | 54.28 (46.50, 63.34) | 1.85 (1.80, 1.90)    | <0.001 | 350.59 (312.92, 391.30) | 598.13 (510.49, 705.00) | 1.87 (1.83, 1.91)    | <0.001 | 7.66 (6.21, 9.34)    | 19.46 (15.38, 25.57) | 3.71 (2.81, 4.61)    | <0.001 | 0.14 (0.11, 0.17) | 0.36 (0.28, 0.48) | 3.86 (2.97, 4.76)    | <0.001 |
| Southern Sub-Saharan Africa | 2.72 (2.26, 3.25)    | 8.47 (6.24, 11.10)   | 3.99 (3.69, 4.28)    | <0.001 | 20.59 (13.65, 28.58)    | 71.50 (49.10, 100.74)   | 4.40 (4.14, 4.67)    | <0.001 | 46.38 (34.32, 57.83) | 26.57 (18.69, 38.04) | -1.91 (-2.43, -1.39) | <0.001 | 0.89 (0.66, 1.12) | 0.51 (0.36, 0.66) | -1.92 (-2.44, -1.40) | <0.001 |



|                                                         |                       |                            |                         |        |                          |                               |                            |        |                         |                         |                  |        |                |                |                       |        |
|---------------------------------------------------------|-----------------------|----------------------------|-------------------------|--------|--------------------------|-------------------------------|----------------------------|--------|-------------------------|-------------------------|------------------|--------|----------------|----------------|-----------------------|--------|
|                                                         |                       |                            |                         |        |                          |                               |                            |        |                         |                         |                  | -1.38) | 1.12)          | 0.73)          | -1.39)                |        |
| High-income Asia Pacific                                | 81.02<br>(74.48,      | 94.82<br>(86.22,           | 0.55 (0.43,<br>0.67)    | <0.001 | 904.14<br>(822.27,       | 1059.58<br>(952.94,           | 0.55 (0.45,<br>0.66)       | <0.001 | 18.88 (16.92,<br>21.34) | 8.58 (7.07,<br>10.83)   | -2.68<br>(-3.08, | <0.001 | 0.34<br>(0.31, | 0.14<br>(0.12, | -2.96<br>(-3.44,      | <0.001 |
| Central Europe                                          | 26.27<br>(21.70,      | 43.23<br>(36.37,           | 1.74 (1.68,<br>1.80)    | <0.001 | 288.14<br>(232.25,       | 475.21<br>(391.88,            | 1.76 (1.67,<br>1.85)       | <0.001 | 22.73 (19.65,<br>26.43) | 24.23 (19.92,<br>28.80) | 0.20<br>(-0.19,  | 0.317  | 0.43<br>(0.37, | 0.46<br>(0.37, | 0.18 (-0.22,<br>0.58) | 0.383  |
| Andean Latin America                                    | 1.14 (0.78,<br>1.56)  | 3.67 (2.74,<br>4.73)       | 4.13 (3.90,<br>4.36)    | <0.001 | 0.00 (0.00,<br>0.00)     | 29.88 (14.86,<br>47.68)       | —<br>—                     | —<br>— | 12.30 (8.14,<br>17.66)  | 10.59 (7.13,<br>15.37)  | -0.47<br>(-0.82, | 0.007  | 0.24<br>(0.16, | 0.20<br>(0.14, | -0.49<br>(-0.83,      | 0.006  |
| Caribbean                                               | 3.14 (2.45,<br>3.89)  | 4.87 (3.85,<br>6.07)       | 1.51 (1.47,<br>1.55)    | <0.001 | 25.65 (15.35,<br>38.15)  | 46.95 (31.59,<br>64.46)       | 2.10 (1.84,<br>2.35)       | <0.001 | 37.16 (28.89,<br>47.19) | 30.83 (21.80,<br>42.64) | -0.65<br>(-0.85, | <0.001 | 0.72<br>(0.56, | 0.60<br>(0.42, | -0.66<br>(-0.85,      | <0.001 |
| Southern Latin America                                  | 4.78 (3.43,<br>6.49)  | 9.83 (7.67,<br>12.20)      | 2.50 (2.46,<br>2.55)    | <0.001 | 47.26 (22.42,<br>75.60)  | 107.02 (68.53,<br>146.05)     | 2.88 (2.56,<br>3.19)       | <0.001 | 27.39 (20.85,<br>35.18) | 22.09 (16.98,<br>28.32) | -0.63<br>(-1.14, | 0.016  | 0.53<br>(0.40, | 0.42<br>(0.33, | -0.64<br>(-1.16,      | 0.014  |
| Oceania                                                 | 2.92 (2.08,<br>3.97)  | 2.96 (2.07,<br>4.04)       | -0.01 (-0.15,<br>0.13)  | 0.904  | 28.05 (11.92,<br>49.68)  | 27.40 (9.02,<br>49.79)        | -0.12<br>(-0.31,<br>0.07)  | 0.213  | 24.62 (12.86,<br>45.06) | 22.48 (11.62,<br>41.73) | -0.32<br>(-0.47, | <0.001 | 0.48<br>(0.25, | 0.43<br>(0.22, | -0.32<br>(-0.47,      | <0.001 |
| Australasia                                             | 7.58 (6.14,<br>9.45)  | 24.37<br>(18.87,<br>30.53) | 4.11 (3.95,<br>4.28)    | <0.001 | 78.13 (50.47,<br>116.41) | 266.72<br>(187.90,<br>359.95) | 4.29 (4.01,<br>4.58)       | <0.001 | 22.51 (17.60,<br>28.52) | 16.90 (12.03,<br>23.04) | -0.94<br>(-1.69, | 0.016  | 0.43<br>(0.34, | 0.32<br>(0.23, | -0.98<br>(-1.74,      | 0.013  |
| <b>Cardiomyopathy and myocarditis 15-19 years Women</b> |                       |                            |                         |        |                          |                               |                            |        |                         |                         |                  |        |                |                |                       |        |
| Global                                                  | 7.33 (4.12,<br>11.85) | 6.90 (3.88,<br>11.19)      | -0.21 (-0.23,<br>-0.20) | <0.001 | 1.05 (0.58,<br>1.61)     | 0.86 (0.46,<br>1.34)          | -0.60<br>(-0.87,<br>-0.33) | <0.001 | 19.14 (15.31,<br>27.43) | 13.42 (10.83,<br>16.09) | -1.17<br>(-1.26, | <0.001 | 0.26<br>(0.20, | 0.18<br>(0.14, | -1.20<br>(-1.29,      | <0.001 |
| <b>SDI category</b>                                     |                       |                            |                         |        |                          |                               |                            |        |                         |                         |                  |        |                |                |                       |        |
| High                                                    | 6.94 (3.84,<br>11.32) | 6.79 (4.00,<br>10.75)      | -0.08 (-0.13,<br>-0.03) | 0.003  | 8.81 (4.90,<br>13.64)    | 9.23 (4.94,<br>14.43)         | 0.34 (-0.02,<br>0.69)      | 0.062  | 30.82 (27.26,<br>34.92) | 20.53 (17.74,<br>23.69) | -1.24<br>(-1.50, | <0.001 | 0.38<br>(0.34, | 0.24<br>(0.21, | -1.50<br>(-1.86,      | <0.001 |

|                                 |             |             |               |        |             |             |             |       |               |               |        |        |        |        |              |        |
|---------------------------------|-------------|-------------|---------------|--------|-------------|-------------|-------------|-------|---------------|---------------|--------|--------|--------|--------|--------------|--------|
| High-middle                     | 7.20 (3.99, | 6.67 (3.80, | -0.27 (-0.33, | <0.001 | 0.07 (0.01, | 0.08 (0.01, | 0.52 (0.19, | 0.002 | 24.43 (20.41, | 19.73 (15.15, | -0.76  | <0.001 | 0.33   | 0.27   | -0.78        | <0.001 |
|                                 | 11.84)      | 10.75)      | -0.20)        |        |             |             |             |       |               |               | 0.14)  |        | 0.16)  | 0.84)  | 33.72)       |        |
| Middle                          | 7.69 (4.33, | 6.90 (3.85, | -0.38 (-0.39, | <0.001 | —           | —           | —           | —     | 18.68 (13.79, | 13.81 (10.90, | -1.02  | <0.001 | 0.26   | 0.19   | -1.04        | <0.001 |
|                                 | 12.47)      | 11.23)      | -0.36)        |        |             |             |             |       |               |               | 31.57) |        | 18.00) | -1.12, | (0.19,       |        |
| Low-middle                      | 7.29 (4.06, | 7.06 (3.91, | -0.11 (-0.12, | <0.001 | —           | —           | —           | —     | 12.22 (7.53,  | 9.28 (7.01,   | -0.95  | <0.001 | 0.17   | 0.13   | -0.93        | <0.001 |
|                                 | 11.83)      | 11.51)      | -0.09)        |        |             |             |             |       |               |               | 18.38) |        | 12.14) | -1.05, | (0.10,       |        |
| Low                             | 6.89 (3.83, | 6.88 (3.82, | -0.01 (-0.01, | <0.001 | —           | —           | —           | —     | 12.66 (6.14,  | 11.22 (7.42,  | -0.44  | <0.001 | 0.17   | 0.15   | -0.45        | <0.001 |
|                                 | 11.28)      | 11.26)      | -0.01)        |        |             |             |             |       |               |               | 19.48) |        | 15.83) | -0.53, | (0.08,       |        |
| <b>21 GBD region</b>            |             |             |               |        |             |             |             |       |               |               |        |        |        |        |              |        |
| South Asia                      | 7.26 (4.05, | 7.27 (4.05, | 0.01 (0.01,   | <0.001 | —           | —           | —           | —     | 4.17 (1.89,   | 3.27 (2.20,   | -0.85  | <0.001 | 0.06   | 0.04   | -0.87        | <0.001 |
|                                 | 11.94)      | 11.96)      | 0.01)         |        |             |             |             |       |               |               | 7.19)  |        | 4.88)  | -1.13, | (0.02,       |        |
| East Asia                       | 8.81 (4.93, | 7.30 (4.24, | -0.65 (-0.70, | <0.001 | —           | —           | —           | —     | 20.39 (14.09, | 15.08 (9.41,  | -0.95  | <0.001 | 0.28   | 0.20   | -0.96        | <0.001 |
|                                 | 14.45)      | 11.66)      | -0.61)        |        |             |             |             |       |               |               | 39.73) |        | 19.18) | -1.20, | (0.19,       |        |
| North Africa and<br>Middle East | 5.36 (2.87, | 5.32 (2.84, | -0.02 (-0.03, | <0.001 | —           | —           | —           | —     | 29.31 (16.97, | 19.42 (13.17, | -1.39  | <0.001 | 0.40   | 0.26   | -1.42        | <0.001 |
|                                 | 9.12)       | 9.05)       | -0.02)        |        |             |             |             |       |               |               | 49.24) |        | 32.48) | -1.57, | (0.23,       |        |
| Western<br>Sub-Saharan Africa   | 7.00 (3.90, | 7.00 (3.90, | 0.00 (0.00,   | 0.032  | —           | —           | —           | —     | 13.02 (6.13,  | 9.51 (5.90,   | -1.11  | <0.001 | 0.18   | 0.13   | -1.13        | <0.001 |
|                                 | 11.46)      | 11.47)      | 0.00)*        |        |             |             |             |       |               |               | 22.13) |        | 13.96) | -1.25, | (0.08,       |        |
| Southeast Asia                  | 7.15 (4.01, | 7.18 (4.03, | 0.01 (0.01,   | <0.001 | —           | —           | —           | —     | 14.64 (8.42,  | 13.33 (9.32,  | -0.28  | 0.004  | 0.20   | 0.18   | -0.30        | 0.003  |
|                                 | 11.62)      | 11.62)      | 0.02)         |        |             |             |             |       |               |               | 24.92) |        | 18.08) | -0.47, | (0.11,       |        |
| Eastern Sub-Saharan<br>Africa   | 6.93 (3.86, | 6.93 (3.86, | 0.00 (0.00,   | <0.001 | —           | —           | —           | —     | 11.17 (6.40,  | 9.56 (6.13,   | -0.54  | <0.001 | 0.15   | 0.13   | -0.55        | <0.001 |
|                                 | 11.37)      | 11.37)      | 0.00)*        |        |             |             |             |       |               |               | 17.15) |        | 15.04) | -0.66, | (0.09,       |        |
| Central Latin<br>America        | 6.36 (3.47, | 6.33 (3.42, | -0.02 (-0.02, | <0.001 | —           | —           | —           | —     | 11.58 (9.68,  | 11.24 (8.46,  | 0.07   | 0.782  | 0.15   | 0.15   | 0.08 (-0.42, | 0.749  |
|                                 | 10.40)      | 10.36)      | -0.02)        |        |             |             |             |       |               |               | 14.03) |        | 13.61) | -0.41, | (0.13,       |        |

|                             |                    |                    |                            |        |                      |                      |                      |       |                      |                      |                      |                     |                   |                      |        |
|-----------------------------|--------------------|--------------------|----------------------------|--------|----------------------|----------------------|----------------------|-------|----------------------|----------------------|----------------------|---------------------|-------------------|----------------------|--------|
|                             |                    |                    |                            |        |                      |                      |                      |       |                      |                      | 0.55)                | 0.19)               | 0.18)             |                      |        |
| Tropical Latin America      | 6.69 (3.65, 10.91) | 6.68 (3.65, 10.90) | -0.0048 (-0.0050, -0.0047) | <0.001 | —                    | —                    | —                    | —     | 33.11 (27.85, 38.61) | 26.56 (22.11, 30.48) | -0.66 (-1.07, -0.24) | 0.002 (0.38, 0.52)  | 0.36 (0.30, 0.41) | -0.68 (-1.11, -0.24) | 0.002  |
| Central Sub-Saharan Africa  | 6.67 (3.70, 11.26) | 6.67 (3.70, 11.26) | 0.00 (0.00, 0.00)*         | <0.001 | —                    | —                    | —                    | —     | 39.37 (12.25, 76.15) | 36.87 (16.85, 66.02) | -0.27 (-0.42, -0.13) | <0.001 (0.17, 1.06) | 0.51 (0.23, 0.92) | -0.27 (-0.42, -0.13) | <0.001 |
| Western Europe              | 6.23 (3.41, 10.41) | 6.17 (3.40, 10.32) | -0.04 (-0.06, -0.01)       | 0.006  | 0.42 (0.08, 0.93)    | —                    | —                    | —     | 22.25 (18.49, 24.98) | 10.33 (8.63, 13.32)  | -2.64 (-3.06, -2.22) | <0.001 (0.23, 0.32) | 0.12 (0.10, 0.17) | -2.94 (-3.30, -2.58) | <0.001 |
| High-income North America   | 6.63 (3.55, 11.03) | 6.86 (4.07, 10.72) | 0.11 (0.04, 0.17)          | 0.001  | 26.78 (14.85, 41.88) | 22.49 (12.08, 35.10) | -0.57 (-0.97, -0.17) | 0.005 | 37.97 (33.42, 43.64) | 30.79 (25.69, 35.58) | -0.61 (-1.16, -0.06) | 0.030 (0.40, 0.50)  | 0.36 (0.30, 0.40) | -0.69 (-1.25, -0.14) | 0.014  |
| Central Asia                | 7.20 (3.98, 11.82) | 7.20 (3.98, 11.82) | 0.00 (0.00, 0.00)*         | <0.001 | —                    | —                    | —                    | —     | 29.95 (23.24, 40.09) | 41.70 (28.58, 52.77) | 1.14 (0.80, 1.48)    | <0.001 (0.32, 0.56) | 0.58 (0.40, 0.73) | 1.16 (0.81, 1.50)    | <0.001 |
| Eastern Europe              | 8.00 (4.48, 13.10) | 8.01 (4.49, 13.13) | 0.00 (0.00, 0.01)          | <0.001 | —                    | —                    | —                    | —     | 39.69 (34.86, 54.36) | 51.34 (34.85, 60.32) | 0.72 (0.05, 1.40)    | 0.036 (0.48, 0.75)  | 0.71 (0.48, 0.83) | 0.74 (0.05, 1.43)    | 0.034  |
| Southern Sub-Saharan Africa | 7.14 (3.96, 11.72) | 7.11 (3.94, 11.63) | -0.02 (-0.02, -0.01)       | <0.001 | —                    | —                    | —                    | —     | 44.74 (30.12, 59.54) | 31.33 (19.48, 49.07) | -1.17 (-1.71, -0.63) | <0.001 (0.42, 0.83) | 0.44 (0.27, 0.68) | -1.18 (-1.73, -0.64) | <0.001 |
| High-income Asia Pacific    | 8.35 (4.74, 13.40) | 8.34 (4.81, 13.22) | -0.01 (-0.02, 0.00)        | 0.210  | —                    | —                    | —                    | —     | 30.01 (25.29, 38.12) | 13.92 (11.07, 17.37) | -2.66 (-3.03, -2.29) | <0.001 (0.32, 0.50) | 0.15 (0.12, 0.19) | -3.11 (-3.54, -2.67) | <0.001 |
| Central Europe              | 6.48 (3.58, 10.60) | 6.47 (3.57, 10.59) | -0.01 (-0.05, 0.03)        | 0.653  | —                    | —                    | —                    | —     | 28.25 (24.45, 32.96) | 17.01 (14.16, 20.32) | -1.64 (-2.30, -0.96) | <0.001 (0.34, 0.45) | 0.23 (0.19, 0.28) | -1.66 (-2.33, -0.98) | <0.001 |
| Andean Latin America        | 5.74 (3.13, 9.65)  | 5.79 (3.15, 9.71)  | 0.03 (0.03, 0.03)          | <0.001 | —                    | —                    | —                    | —     | 18.32 (10.99, 28.00) | 13.04 (7.90, 19.97)  | -1.20 (-1.46, -0.94) | <0.001 (0.15, 0.39) | 0.18 (0.10, 0.27) | -1.24 (-1.51, -0.96) | <0.001 |
| Caribbean                   | 5.95 (3.20, 9.91)  | 5.95 (3.20, 9.91)  | 0.00 (0.00, 0.00)*         | <0.001 | —                    | —                    | —                    | —     | 31.00 (20.17, 50.39) | 34.74 (17.76, 69.61) | 0.59 (0.33, 0.87)    | <0.001 (0.27, 0.24) | 0.48 (0.24, 0.87) | 0.60 (0.33, 0.87)    | <0.001 |

|                        |                     |                     |                         |        |                     |                      |                      |        |                      |                      |                      |        |                   |                   |                      |        |
|------------------------|---------------------|---------------------|-------------------------|--------|---------------------|----------------------|----------------------|--------|----------------------|----------------------|----------------------|--------|-------------------|-------------------|----------------------|--------|
|                        |                     |                     |                         |        |                     |                      |                      |        |                      |                      | 0.85)                |        | 0.70)             | 0.97)             |                      |        |
| Southern Latin America | 4.78 (2.60, 8.08)   | 4.78 (2.60, 8.08)   | 0.00 (-0.00, 0.00)      | 0.888  | —                   | —                    | —                    | —      | 32.28 (23.52, 45.49) | 22.86 (17.12, 30.46) | -1.35 (-1.58, -1.11) | <0.001 | 0.43 (0.31, 0.62) | 0.30 (0.22, 0.41) | -1.40 (-1.64, -1.16) | <0.001 |
| Oceania                | 7.25 (4.04, 11.84)  | 7.25 (4.04, 11.84)  | 0.00 (0.00, 0.00)*      | <0.001 | —                   | —                    | —                    | —      | 18.12 (8.02, 37.13)  | 23.12 (9.68, 46.49)  | 0.78 (0.26, 1.29)    | 0.003  | 0.25 (0.11, 0.52) | 0.32 (0.13, 0.65) | 0.78 (0.27, 1.30)    | 0.003  |
| Australasia            | 5.48 (2.99, 9.12)   | 5.46 (3.00, 8.92)   | -0.02 (-0.03, -0.00)    | 0.032  | —                   | —                    | —                    | —      | 38.15 (29.19, 46.48) | 13.51 (10.18, 17.77) | -3.46 (-4.57, -2.33) | <0.001 | 0.51 (0.38, 0.62) | 0.17 (0.12, 0.23) | -3.60 (-4.91, -2.27) | <0.001 |
| <b>Men</b>             |                     |                     |                         |        |                     |                      |                      |        |                      |                      |                      |        |                   |                   |                      |        |
| Global                 | 12.43 (6.93, 20.39) | 11.51 (6.48, 18.45) | -0.26 (-0.28, -0.25)    | <0.001 | 2.01 (1.17, 2.95)   | 1.82 (1.08, 2.66)    | -0.26 (-0.52, -0.00) | 0.048  | 39.33 (32.75, 52.35) | 32.70 (26.42, 40.50) | -0.65 (-0.87, -0.43) | <0.001 | 0.54 (0.45, 0.72) | 0.45 (0.36, 0.56) | -0.63 (-0.81, -0.45) | <0.001 |
| <b>SDI category</b>    |                     |                     |                         |        |                     |                      |                      |        |                      |                      |                      |        |                   |                   |                      |        |
| High                   | 15.72 (8.65, 25.58) | 16.19 (9.60, 25.16) | 0.10 (0.06, 0.13)       | <0.001 | 16.65 (9.69, 24.49) | 19.24 (11.36, 28.18) | 0.57 (0.31, 0.83)    | <0.001 | 64.34 (53.74, 74.10) | 42.64 (36.24, 48.16) | -1.42 (-1.64, -1.21) | <0.001 | 0.84 (0.69, 0.98) | 0.54 (0.45, 0.60) | -1.56 (-1.82, -1.30) | <0.001 |
| High-middle            | 13.46 (7.49, 22.08) | 12.93 (7.17, 21.02) | -0.14 (-0.16, -0.12)    | <0.001 | 0.08 (0.02, 0.17)   | 0.12 (0.04, 0.23)    | 1.77 (1.19, 2.35)    | <0.001 | 54.41 (47.20, 71.71) | 44.37 (34.02, 51.35) | -0.76 (-1.45, -0.06) | 0.033  | 0.75 (0.65, 0.99) | 0.61 (0.46, 0.71) | -0.77 (-1.46, -0.07) | 0.032  |
| Middle                 | 12.68 (7.14, 20.83) | 11.68 (6.52, 19.03) | -0.29 (-0.30, -0.27)    | <0.001 | —                   | —                    | —                    | —      | 33.01 (26.25, 50.26) | 29.30 (23.42, 40.66) | -0.41 (-0.50, -0.32) | <0.001 | 0.45 (0.36, 0.69) | 0.40 (0.32, 0.56) | -0.41 (-0.50, -0.32) | <0.001 |
| Low-middle             | 10.61 (5.94, 17.31) | 10.33 (5.79, 16.92) | -0.09 (-0.10, -0.08)    | <0.001 | —                   | —                    | —                    | —      | 23.10 (15.32, 32.62) | 24.23 (18.26, 31.33) | 0.16 (0.02, 0.29)    | 0.025  | 0.32 (0.21, 0.45) | 0.34 (0.25, 0.43) | 0.16 (0.03, 0.30)    | 0.019  |
| Low                    | 9.73 (5.46, 15.89)  | 9.71 (5.46, 15.86)  | -0.00 (-0.01, -0.00)    | <0.001 | —                   | —                    | —                    | —      | 39.00 (21.56, 55.84) | 36.94 (26.52, 50.81) | -0.16 (-0.33, -0.00) | 0.047  | 0.54 (0.30, 0.78) | 0.51 (0.37, 0.71) | -0.16 (-0.33, -0.00) | 0.048  |
| <b>21 GBD region</b>   |                     |                     |                         |        |                     |                      |                      |        |                      |                      |                      |        |                   |                   |                      |        |
| South Asia             | 10.07 (5.63, 16.51) | 10.09 (5.64, 16.55) | 0.0060 (0.0057, 0.0063) | <0.001 | —                   | —                    | —                    | —      | 7.66 (3.75, 13.93)   | 8.01 (5.19, 11.30)   | 0.21 (-0.37, 0.95)   | 0.476  | 0.10 (0.05, 0.15) | 0.11 (0.07, 0.15) | 0.22 (-0.38, 0.82)   | 0.472  |

|                              |              |              | 0.0063)       |        |               |               |              |       |               |               | 0.80)   |        | 0.19)  | 0.16)  |              |        |
|------------------------------|--------------|--------------|---------------|--------|---------------|---------------|--------------|-------|---------------|---------------|---------|--------|--------|--------|--------------|--------|
| East Asia                    | 15.14 (8.57, | 14.89 (8.42, | -0.06 (-0.07, | <0.001 | —             | —             | —            | —     | 37.81 (28.37, | 27.54 (18.61, | -1.10   | <0.001 | 0.52   | 0.37   | -1.14        | <0.001 |
|                              | 24.87)       | 23.77)       | -0.05)        |        |               |               |              |       | 59.11)        | 36.22)        | (-1.35, |        | (0.39, | (0.25, | (-1.39,      |        |
| North Africa and Middle East | 9.54 (5.33,  | 9.52 (5.29,  | -0.00 (-0.01, | 0.514  | —             | —             | —            | —     | 58.68 (39.59, | 44.96 (27.56, | -0.90   | <0.001 | 0.81   | 0.61   | -0.91        | <0.001 |
|                              | 15.74)       | 15.72)       | 0.01)         |        |               |               |              |       | 96.98)        | 76.67)        | (-1.13, |        | (0.54, | (0.37, | (-1.15,      |        |
| Western Sub-Saharan Africa   | 9.70 (5.43,  | 9.70 (5.43,  | 0.00 (0.00,   | 0.085  | —             | —             | —            | —     | 92.17 (49.26, | 77.05 (52.96, | -0.65   | <0.001 | 1.29   | 1.08   | -0.65        | <0.001 |
|                              | 15.83)       | 15.83)       | 0.00)         |        |               |               |              |       | 136.91)       | 106.03)       | (-0.79, |        | (0.69, | (0.74, | (-0.79,      |        |
| Southeast Asia               | 12.70 (7.18, | 12.84 (7.21, | 0.04 (0.03,   | <0.001 | —             | —             | —            | —     | 21.21 (13.70, | 24.37 (17.73, | 0.50    | 0.001  | 0.29   | 0.33   | 0.50 (0.20,  | 0.001  |
|                              | 21.00)       | 21.11)       | 0.04)         |        |               |               |              |       | 38.42)        | 34.71)        | (0.20,  |        | (0.18, | (0.24, | 0.81)        |        |
| Eastern Sub-Saharan Africa   | 9.63 (5.39,  | 9.64 (5.39,  | 0.00 (0.00,   | <0.001 | —             | —             | —            | —     | 30.44 (18.52, | 29.66 (17.04, | -0.08   | 0.189  | 0.42   | 0.41   | -0.08        | 0.191  |
|                              | 15.68)       | 15.70)       | 0.00)*        |        |               |               |              |       | 41.64)        | 44.93)        | (-0.21, |        | (0.26, | (0.23, | (-0.21,      |        |
| Central Latin America        | 8.88 (4.94,  | 8.83 (4.92,  | -0.02 (-0.02, | <0.001 | —             | —             | —            | —     | 21.44 (17.67, | 21.54 (14.38, | 0.07    | 0.799  | 0.29   | 0.29   | 0.07 (-0.45, | 0.786  |
|                              | 14.67)       | 14.66)       | -0.01)        |        |               |               |              |       | 26.28)        | 26.97)        | (-0.44, |        | (0.24, | (0.19, | 0.59)        |        |
| Tropical Latin America       | 9.24 (5.09,  | 9.23 (5.08,  | -0.0039       | <0.001 | —             | —             | —            | —     | 58.44 (46.40, | 60.45 (41.57, | 0.14    | 0.339  | 0.80   | 0.83   | 0.14 (-0.14, | 0.340  |
|                              | 15.31)       | 15.29)       | (-0.0041,     |        |               |               |              |       | 68.13)        | 70.68)        | (-0.14, |        | (0.63, | (0.57, | 0.42)        |        |
| Central Sub-Saharan Africa   | 9.28 (5.16,  | 9.28 (5.16,  | 0.00 (0.00,   | <0.001 | —             | —             | —            | —     | 67.11 (30.85, | 60.68 (34.14, | -0.37   | 0.001  | 0.94   | 0.85   | -0.37        | 0.001  |
|                              | 15.07)       | 15.07)       | 0.00)*        |        |               |               |              |       | 114.86)       | 102.34)       | (-0.58, |        | (0.43, | (0.48, | (-0.58,      |        |
| Western Europe               | 14.34 (7.81, | 14.74 (7.93, | 0.09 (0.08,   | <0.001 | 0.45 (0.09,   | —             | —            | —     | 53.98 (41.98, | 25.62 (21.79, | -2.49   | <0.001 | 0.72   | 0.33   | -2.63        | <0.001 |
|                              | 23.22)       | 23.95)       | 0.11)         |        |               |               |              |       | 64.38)        | 32.73)        | (-2.93, |        | (0.55, | (0.28, | (-3.16,      |        |
| High-income North America    | 14.85 (7.92, | 16.82        | 0.43 (0.34,   | <0.001 | 39.73 (23.34, | 42.21 (24.53, | 0.27 (-0.03, | 0.078 | 84.03 (71.82, | 63.51 (52.28, | -0.99   | <0.001 | 1.08   | 0.79   | -1.10        | <0.001 |
|                              | 24.64)       | (10.49,      | 0.51)         |        |               |               |              |       | 58.66)        | 62.05)        | 0.56)   |        | 93.74) | 71.33) | (-1.24,      |        |
| Central Asia                 | 11.31 (6.06, | 11.31 (6.06, | 0.00009       | <0.001 | —             | —             | —            | —     | 48.16 (38.09, | 70.21 (48.54, | 1.34    | 0.004  | 0.67   | 0.98   | 1.36 (0.44,  | 0.004  |
|                              | 18.33)       | 18.33)       | (0.00006,     |        |               |               |              |       | 68.77)        | 88.72)        | (0.43,  |        | (0.53, | (0.67, | 2.29)        |        |

|                             |                      |                      |                      |        |                     |                     |                      |       |                        |                        |                      |        |                   |                   |                      |        |
|-----------------------------|----------------------|----------------------|----------------------|--------|---------------------|---------------------|----------------------|-------|------------------------|------------------------|----------------------|--------|-------------------|-------------------|----------------------|--------|
|                             |                      |                      | 0.00012)             |        |                     |                     |                      |       |                        |                        | 2.27)                | 0.96)  | 1.24)             |                   |                      |        |
| Eastern Europe              | 15.12 (8.39, 24.38)  | 15.13 (8.38, 24.40)  | 0.00 (-0.00, 0.00)   | 0.231  | —                   | —                   | —                    | —     | 102.20 (90.97, 132.07) | 126.36 (91.28, 150.14) | 0.87 (-0.52, 2.28)   | 0.220  | 1.42 (1.26, 1.83) | 1.76 (1.27, 2.10) | 0.88 (-0.51, 2.30)   | 0.216  |
| Southern Sub-Saharan Africa | 9.90 (5.54, 16.16)   | 9.87 (5.52, 16.11)   | -0.01 (-0.01, -0.01) | <0.001 | —                   | —                   | —                    | —     | 57.67 (40.73, 80.78)   | 64.49 (40.66, 96.36)   | 0.37 (-0.09, 0.83)   | 0.114  | 0.80 (0.57, 1.13) | 0.90 (0.57, 1.34) | 0.44 (-0.08, 0.96)   | 0.096  |
| High-income Asia Pacific    | 20.11 (11.31, 32.91) | 21.67 (12.55, 34.48) | 0.25 (0.24, 0.27)    | <0.001 | 14.85 (7.82, 23.39) | 14.33 (7.53, 23.12) | -0.19 (-0.52, 0.14)  | 0.258 | 54.79 (45.76, 71.78)   | 26.43 (22.48, 34.58)   | -2.52 (-2.78, -2.27) | <0.001 | 0.71 (0.60, 0.96) | 0.32 (0.27, 0.43) | -2.82 (-3.08, -2.56) | <0.001 |
| Central Europe              | 15.53 (8.41, 25.58)  | 15.62 (8.52, 25.66)  | 0.03 (0.00, 0.05)    | 0.015  | —                   | —                   | —                    | —     | 52.50 (45.81, 66.31)   | 40.41 (30.47, 50.28)   | -0.88 (-1.28, -0.47) | <0.001 | 0.72 (0.63, 0.92) | 0.55 (0.41, 0.69) | -0.88 (-1.29, -0.47) | <0.001 |
| Andean Latin America        | 8.10 (4.41, 13.38)   | 8.11 (4.37, 13.35)   | 0.00 (0.00, 0.00)*   | <0.001 | —                   | —                   | —                    | —     | 24.70 (15.89, 36.51)   | 22.24 (13.96, 33.62)   | -0.37 (-0.70, -0.04) | 0.026  | 0.34 (0.21, 0.50) | 0.30 (0.19, 0.46) | -0.39 (-0.72, -0.05) | 0.023  |
| Caribbean                   | 8.41 (4.65, 14.03)   | 8.41 (4.65, 14.03)   | 0.00 (0.00, 0.00)*   | <0.001 | —                   | —                   | —                    | —     | 43.82 (33.67, 61.04)   | 44.27 (29.29, 67.10)   | 0.14 (-0.06, 0.34)   | 0.164  | 0.60 (0.46, 0.85) | 0.61 (0.40, 0.93) | 0.14 (-0.06, 0.34)   | 0.162  |
| Southern Latin America      | 11.20 (6.09, 18.46)  | 11.20 (6.09, 18.46)  | -0.00 (-0.00, 0.00)  | 0.466  | —                   | —                   | —                    | —     | 61.43 (46.21, 86.43)   | 48.50 (37.56, 66.39)   | -0.90 (-1.21, -0.59) | <0.001 | 0.83 (0.62, 1.18) | 0.65 (0.50, 0.91) | -0.92 (-1.24, -0.59) | <0.001 |
| Oceania                     | 12.56 (7.03, 20.54)  | 12.56 (7.03, 20.54)  | 0.00 (-0.00, 0.00)   | 1.000  | —                   | —                   | —                    | —     | 33.08 (17.55, 61.55)   | 44.10 (22.83, 89.79)   | 0.92 (0.78, 1.06)    | <0.001 | 0.46 (0.24, 0.85) | 0.61 (0.31, 1.25) | 0.93 (0.79, 1.07)    | <0.001 |
| Australasia                 | 12.52 (6.85, 20.87)  | 12.56 (6.90, 20.73)  | 0.01 (0.01, 0.02)    | <0.001 | —                   | —                   | —                    | —     | 78.36 (57.80, 94.77)   | 31.88 (25.11, 40.63)   | -3.10 (-3.74, -2.45) | <0.001 | 1.07 (0.78, 1.30) | 0.42 (0.33, 0.54) | -3.19 (-3.85, -2.53) | <0.001 |
| <b>20-24 years</b>          |                      |                      |                      |        |                     |                     |                      |       |                        |                        |                      |        |                   |                   |                      |        |
| <b>Women</b>                |                      |                      |                      |        |                     |                     |                      |       |                        |                        |                      |        |                   |                   |                      |        |
| Global                      | 8.00 (4.55, 12.76)   | 7.67 (4.42, 12.06)   | -0.14 (-0.16, -0.13) | <0.001 | 2.91 (1.89, 4.20)   | 2.40 (1.52, 3.46)   | -0.58 (-0.92, -0.24) | 0.001 | 24.16 (19.38, 32.87)   | 18.19 (14.28, 21.30)   | -0.96 (-1.32, -0.61) | <0.001 | 0.35 (0.27, 0.48) | 0.26 (0.20, 0.31) | -0.98 (-1.36, -0.60) | <0.001 |

| SDI category                 |             |             |               |        |               |               |             |       |               |               |              |        |              |         |        |        |
|------------------------------|-------------|-------------|---------------|--------|---------------|---------------|-------------|-------|---------------|---------------|--------------|--------|--------------|---------|--------|--------|
| High                         | 7.56 (4.28, | 7.44 (4.45, | -0.06 (-0.11, | 0.004  | 22.29 (14.45, | 23.66 (14.96, | 0.32 (0.01, | 0.046 | 36.43 (32.35, | 26.60 (23.05, | -1.11        | <0.001 | 0.48         | 0.33    | -1.27  | <0.001 |
|                              | 12.18)      | 11.41)      | -0.02)        |        |               |               |             |       |               |               | 32.17)       |        | 34.14)       | 0.62)   | 41.68) |        |
| High-middle                  | 7.73 (4.32, | 7.27 (4.20, | -0.22 (-0.25, | <0.001 | 0.14 (0.06,   | 0.16 (0.07,   | 0.70 (0.16, | 0.010 | 30.75 (26.28, | 28.01 (20.15, | -0.21        | 0.457  | 0.45         | 0.41    | -0.21  | 0.468  |
|                              | 12.50)      | 11.43)      | -0.19)        |        |               |               |             |       |               |               | 0.25)        |        | 0.29)        | 1.23)   | 41.03) |        |
| Middle                       | 8.27 (4.67, | 7.61 (4.34, | -0.29 (-0.30, | <0.001 | —             | —             | —           | —     | 22.29 (16.58, | 16.75 (12.61, | -0.95        | <0.001 | 0.33         | 0.24    | -0.97  | <0.001 |
|                              | 13.15)      | 12.04)      | -0.27)        |        |               |               |             |       |               |               | 35.81)       |        | 20.82)       | (-1.09, | (0.24, |        |
| Low-middle                   | 8.13 (4.64, | 7.95 (4.55, | -0.08 (-0.08, | <0.001 | —             | —             | —           | —     | 15.53 (9.70,  | 12.40 (8.77,  | -0.71        | <0.001 | 0.23         | 0.18    | -0.78  | <0.001 |
|                              | 12.82)      | 12.50)      | -0.07)        |        |               |               |             |       |               |               | 21.86)       |        | 15.68)       | (-0.98, | (0.14, |        |
| Low                          | 7.86 (4.49, | 7.82 (4.47, | -0.02 (-0.02, | <0.001 | —             | —             | —           | —     | 19.21 (8.22,  | 16.62 (10.52, | -0.48        | <0.001 | 0.29         | 0.25    | -0.49  | <0.001 |
|                              | 12.44)      | 12.40)      | -0.01)        |        |               |               |             |       |               |               | 29.63)       |        | 23.87)       | (-0.59, | (0.12, |        |
| 21 GBD region                |             |             |               |        |               |               |             |       |               |               |              |        |              |         |        |        |
| South Asia                   | 8.22 (4.73, | 8.23 (4.74, | 0.0038        | <0.001 | —             | —             | —           | —     | 4.63 (2.15,   | 3.78 (2.45,   | -0.73        | <0.001 | 0.07         | 0.06    | -0.75  | <0.001 |
|                              |             |             | (0.0035,      |        |               |               |             |       |               |               | 7.83)        |        | 5.40)        | (-1.00, | (0.03, |        |
| East Asia                    | 9.01 (4.96, | 7.76 (4.45, | -0.51 (-0.59, | <0.001 | —             | —             | —           | —     | 22.31 (14.81, | 18.65 (10.63, | -0.70        | 0.069  | 0.33         | 0.27    | -0.73  | 0.067  |
|                              |             |             | -0.44)        |        |               |               |             |       |               |               | 42.23)       |        | 25.44)       | (-1.45, | (0.21, |        |
| North Africa and Middle East | 6.29 (3.61, | 6.25 (3.58, | -0.02 (-0.02, | <0.001 | —             | —             | —           | —     | 34.28 (19.40, | 21.36 (14.46, | -1.63        | <0.001 | 0.51         | 0.31    | -1.68  | <0.001 |
|                              |             |             | -0.02)        |        |               |               |             |       |               |               | 55.26)       |        | 35.23)       | (-1.73, | (0.28, |        |
| Western Sub-Saharan Africa   | 7.95 (4.54, | 7.95 (4.54, | 0.00 (0.00,   | 0.087  | —             | —             | —           | —     | 35.33 (14.80, | 25.03 (15.56, | -1.18        | <0.001 | 0.53         | 0.37    | -1.20  | <0.001 |
|                              |             |             | 0.00)         |        |               |               |             |       |               |               | 58.91)       |        | 37.44)       | (-1.31, | (0.22, |        |
| Southeast Asia               | 7.47 (4.17, | 7.48 (4.17, | 0.01 (0.00,   | <0.001 | —             | —             | —           | —     | 16.30 (8.31,  | 15.44 (8.82,  | -0.17        | 0.025  | 0.24         | 0.22    | -0.18  | 0.018  |
|                              |             |             | 0.01)         |        |               |               |             |       |               |               | 25.87)       |        | 20.69)       | (-0.31, | (0.12, |        |
| Eastern Sub-Saharan          | 7.89 (4.50, | 7.89 (4.50, | -0.00 (-0.00, | 0.006  | —             | —             | —           | —     | 13.09 (6.70,  | 11.36 (7.01,  | -0.48        | <0.001 | 0.19         | 0.17    | -0.50  | <0.001 |
|                              |             |             | 0.00)         |        |               |               |             |       |               |               | 13.09 (6.70, |        | 11.36 (7.01, | (-0.48, | 0.19   |        |

|                     |             |             |               |        |               |               |         |       |               |                |         |        |        |        |             |        |
|---------------------|-------------|-------------|---------------|--------|---------------|---------------|---------|-------|---------------|----------------|---------|--------|--------|--------|-------------|--------|
| Africa              | 12.57)      | 12.57)      | -0.00)*       |        |               |               |         |       | 22.12)        | 17.63)         | (-0.62, |        | (0.10, | (0.10, | (-0.64,     |        |
|                     |             |             |               |        |               |               |         |       |               |                | -0.33)  |        | 0.33)  | 0.26)  | -0.35)      |        |
| Central Latin       | 7.23 (4.05, | 7.20 (4.03, | -0.01 (-0.02, | <0.001 | —             | —             | —       | —     | 13.25 (11.25, | 11.98 (9.01,   | -0.37   |        | 0.19   | 0.17   | -0.38       |        |
| America             | 11.40)      | 11.39)      | -0.01)        |        |               |               |         |       | 15.80)        | 15.14)         | (-0.99, | 0.242  | (0.16, | (0.13, | (-1.04,     | 0.260  |
|                     |             |             |               |        |               |               |         |       |               |                | 0.25)   |        | 0.23)  | 0.22)  | 0.28)       |        |
| Tropical Latin      | 7.59 (4.27, | 7.58 (4.26, | -0.0039       |        |               |               |         |       |               |                | -1.42   |        | 0.72   | 0.46   | -1.46       |        |
| America             | 11.91)      | 11.89)      | (-0.0041,     | <0.001 | —             | —             | —       | —     | 48.83 (37.51, | 31.78 (26.45,  | (-1.61, | <0.001 | (0.55, | (0.38, | (-1.66,     | <0.001 |
|                     |             |             | -0.0037)      |        |               |               |         |       | 56.41)        | 37.18)         | -1.22)  |        | 0.83)  | 0.54)  | -1.26)      |        |
| Central Sub-Saharan | 7.63 (4.29, | 7.63 (4.29, | 0.00 (0.00,   | <0.001 | —             | —             | —       | —     | 42.04 (12.12, | 40.38 (17.69,  | -0.16   |        | 0.63   | 0.60   | -0.16       |        |
| Africa              | 12.26)      | 12.26)      | 0.00)*        |        |               |               |         |       | 82.97)        | 70.69)         | (-0.28, | 0.010  | (0.18, | (0.26, | (-0.28,     | 0.009  |
|                     |             |             |               |        |               |               |         |       |               |                | -0.04)  |        | 1.25)  | 1.06)  | -0.04)      |        |
| Western Europe      | 6.95 (3.97, | 6.90 (3.97, | -0.03 (-0.05, | 0.001  | 0.54 (0.16,   | —             | —       | —     | 24.30 (19.32, | 12.25 (10.52,  | -2.31   |        | 0.33   | 0.16   | -2.47       |        |
|                     | 11.16)      | 10.96)      | -0.01)        |        | 1.02)         |               |         |       | 27.72)        | 15.10)         | (-2.45, | <0.001 | (0.26, | (0.14, | (-2.64,     | <0.001 |
|                     |             |             |               |        |               |               |         |       |               |                | -2.16)  |        | 0.38)  | 0.20)  | -2.30)      |        |
| High-income North   | 7.58 (4.26, | 7.79 (4.75, | 0.09 (0.05,   | <0.001 | 65.71 (42.40, | 60.64 (38.33, | -0.18   |       | 51.75 (45.07, | 43.51 (35.55,  | -0.64   |        | 0.64   | 0.52   | -0.71       |        |
| America             | 12.28)      | 11.41)      | 0.13)         |        | 94.96)        | 87.31)        | (-0.45, | 0.192 | 59.82)        | 50.07)         | (-1.07, | 0.004  | (0.56, | (0.40, | (-1.19,     | 0.004  |
|                     |             |             |               |        |               |               | 0.09)   |       |               |                | -0.20)  |        | 0.71)  | 0.57)  | -0.23)      |        |
| Central Asia        | 7.89 (4.52, | 7.89 (4.52, | 0.00 (0.00,   | <0.001 | —             | —             | —       | —     | 50.22 (38.40, | 66.33 (49.37,  | 0.96    |        | 0.75   | 0.99   | 0.97 (0.65, | <0.001 |
|                     | 12.42)      | 12.42)      | 0.00)*        |        |               |               |         |       | 70.39)        | 84.31)         | (0.64,  | <0.001 | (0.57, | (0.73, | 1.29)       |        |
|                     |             |             |               |        |               |               |         |       |               |                | 1.28)   |        | 1.05)  | 1.26)  |             |        |
| Eastern Europe      | 8.57 (4.96, | 8.58 (4.97, | 0.00 (0.00,   | <0.001 | —             | —             | —       | —     | 71.01 (63.66, | 108.78 (66.94, | 1.42    |        | 1.05   | 1.62   | 1.44 (0.64, | <0.001 |
|                     | 13.68)      | 13.69)      | 0.00)*        |        |               |               |         |       | 85.10)        | 137.52)        | (0.62,  | <0.001 | (0.95, | (0.99, | 2.24)       |        |
|                     |             |             |               |        |               |               |         |       |               |                | 2.21)   |        | 1.27)  | 2.06)  |             |        |
| Southern            | 8.11 (4.64, | 8.08 (4.62, | -0.01 (-0.01, | <0.001 | —             | —             | —       | —     | 57.45 (36.39, | 35.33 (20.28,  | -1.64   |        | 0.86   | 0.53   | -1.65       |        |
| Sub-Saharan Africa  | 12.79)      | 12.74)      | -0.01)        |        |               |               |         |       | 76.29)        | 56.76)         | (-2.48, | <0.001 | (0.55, | (0.30, | (-2.50,     | <0.001 |
|                     |             |             |               |        |               |               |         |       |               |                | -0.78)  |        | 1.15)  | 0.85)  | -0.79)      |        |
| High-income Asia    | 8.57 (4.86, | 8.22 (4.67, | -0.15 (-0.16, | <0.001 | 1.25 (0.37,   | 0.75 (0.17,   | -1.84   |       | 30.75 (26.35, | 15.03 (12.11,  | -2.49   |        | 0.42   | 0.18   | -2.88       |        |
| Pacific             | 13.75)      | 13.15)      | -0.13)        |        | 2.38)         | 1.54)         | (-5.22, | 0.298 | 38.58)        | 19.12)         | (-2.72, | <0.001 | (0.36, | (0.15, | (-3.16,     | <0.001 |
|                     |             |             |               |        |               |               | 1.66)   |       |               |                | -2.25)  |        | 0.53)  | 0.24)  | -2.60)      |        |
| Central Europe      | 6.91 (3.85, | 6.93 (3.87, | 0.00 (-0.04,  | 0.889  | —             | —             | —       | —     | 31.34 (26.38, | 19.00 (15.33,  | -1.72   |        | 0.46   | 0.28   | -1.76       |        |
|                     | 11.04)      | 11.08)      | 0.04)         |        |               |               |         |       | 37.53)        | 23.67)         | (-2.14, | <0.001 | (0.39, | (0.22, | (-2.19,     | <0.001 |
|                     |             |             |               |        |               |               |         |       |               |                | -1.31)  |        | 0.55)  | 0.35)  | -1.32)      |        |
| Andean Latin        | 6.57 (3.72, | 6.62 (3.73, | 0.03 (0.02,   | <0.001 | —             | —             | —       | —     | 18.60 (10.46, | 11.94 (7.60,   | -1.52   | <0.001 | 0.27   | 0.17   | -1.58       | <0.001 |



|                        |              |              |               |        |               |               |             |       |               |               |         |        |        |              |        |
|------------------------|--------------|--------------|---------------|--------|---------------|---------------|-------------|-------|---------------|---------------|---------|--------|--------|--------------|--------|
| America                | 10.45)       | 10.52)       | 0.03)         |        |               |               |             |       | 29.72)        | 17.74)        | (-1.93, | (0.15, | (0.11, | (-1.99,      |        |
|                        |              |              |               |        |               |               |             |       |               |               | -1.12)  | 0.44)  | 0.26)  | -1.16)       |        |
| Caribbean              | 6.80 (3.80,  | 6.80 (3.80,  | 0.00 (-0.00,  | 1.000  | —             | —             | —           | —     | 42.90 (27.42, | 49.77 (25.09, | 0.58    | 0.63   | 0.74   | 0.60 (0.41,  | <0.001 |
|                        | 10.90)       | 10.90)       | 0.00)         |        |               |               |             |       | 71.80)        | 96.61)        | (0.40,  | (0.40, | (0.36, | 0.79)        | <0.001 |
|                        |              |              |               |        |               |               |             |       |               |               | 0.77)   | 1.07)  | 1.43)  |              |        |
| Southern Latin America | 5.35 (2.96,  | 5.35 (2.96,  | 0.00 (-0.00,  | 0.512  | —             | —             | —           | —     | 36.89 (27.58, | 24.46 (18.51, | -1.35   | 0.52   | 0.34   | -1.39        | <0.001 |
|                        | 8.53)        | 8.53)        | 0.00)         |        |               |               |             |       | 49.67)        | 31.93)        | (-1.62, | (0.39, | (0.26, | (-1.70,      | <0.001 |
|                        |              |              |               |        |               |               |             |       |               |               | -1.08)  | 0.72)  | 0.45)  | -1.09)       |        |
| Oceania                | 7.66 (4.46,  | 7.66 (4.46,  | 0.00 (0.00,   | <0.001 | —             | —             | —           | —     | 23.87 (10.02, | 26.17 (9.72,  | 0.25    | 0.36   | 0.39   | 0.25 (0.10,  | 0.002  |
|                        | 12.19)       | 12.19)       | 0.00)*        |        |               |               |             |       | 46.86)        | 52.95)        | (0.09,  | (0.15, | (0.14, | 0.41)        | 0.002  |
|                        |              |              |               |        |               |               |             |       |               |               | 0.41)   | 0.70)  | 0.79)  |              |        |
| Australasia            | 6.17 (3.50,  | 6.15 (3.51,  | -0.01 (-0.02, | <0.001 | —             | —             | —           | —     | 43.77 (32.42, | 15.58 (11.94, | -3.53   | 0.62   | 0.21   | -3.75        | <0.001 |
|                        | 9.97)        | 9.80)        | -0.01)        |        |               |               |             |       | 53.66)        | 21.17)        | (-4.62, | (0.45, | (0.15, | (-4.93,      | <0.001 |
|                        |              |              |               |        |               |               |             |       |               |               | -2.42)  | 0.77)  | 0.29)  | -2.54)       |        |
| <b>Men</b>             |              |              |               |        |               |               |             |       |               |               |         |        |        |              |        |
| Global                 | 14.07 (8.11, | 13.14 (7.76, | -0.24 (-0.25, | <0.001 | 4.76 (3.18,   | 4.39 (2.91,   | -0.23       |       | 46.30 (40.16, | 41.78 (33.53, | -0.38   | 0.67   | 0.61   | -0.38        | <0.001 |
|                        | 22.09)       | 20.20)       | -0.22)        |        | 6.61)         | 6.24)         | (-0.60,     | 0.229 | 58.52)        | 50.23)        | (-0.54, | (0.58, | (0.49, | (-0.56,      | <0.001 |
|                        |              |              |               |        |               |               | 0.14)       |       |               |               | -0.22)  | 0.85)  | 0.74)  | -0.21)       |        |
| <b>SDI category</b>    |              |              |               |        |               |               |             |       |               |               |         |        |        |              |        |
| High                   | 18.28        | 18.76        | 0.09 (0.04,   | <0.001 | 34.93 (23.21, | 41.24 (27.34, | 0.67 (0.08, | 0.027 | 79.57 (69.21, | 59.56 (51.94, | -1.00   | 1.10   | 0.80   | -1.13        | <0.001 |
|                        | (10.78,      | (11.93,      | 0.13)         |        | 48.58)        | 58.53)        | 1.26)       |       | 91.59)        | 67.83)        | (-1.12, | (0.95, | (0.68, | (-1.30,      | <0.001 |
|                        | 28.52)       | 27.84)       |               |        |               |               |             |       |               |               | -0.88)  | 1.29)  | 0.92)  | -0.96)       |        |
| High-middle            | 15.11 (8.66, | 14.69 (8.63, | -0.10 (-0.11, | <0.001 | 0.51 (0.21,   | 0.38 (0.16,   | -0.68       | 0.066 | 69.73 (62.17, | 75.00 (51.47, | 0.13    | 1.03   | 1.11   | 0.13 (-0.34, | 0.580  |
|                        | 23.78)       | 22.83)       | -0.08)        |        | 0.90)         | 0.71)         | (-1.40,     |       | 86.98)        | 86.84)        | (-0.34, | (0.91, | (0.75, | 0.61)        |        |
|                        |              |              |               |        |               |               | 0.05)       |       |               |               | 0.59)   | 1.28)  | 1.28)  |              |        |
| Middle                 | 13.95 (7.99, | 12.98 (7.53, | -0.26 (-0.28, | <0.001 | —             | —             | —           | —     | 35.48 (28.81, | 35.26 (28.05, | -0.01   | 0.52   | 0.52   | -0.01        | 0.884  |
|                        | 21.99)       | 20.12)       | -0.23)        |        |               |               |             |       | 51.84)        | 47.11)        | (-0.18, | (0.42, | (0.41, | (-0.18,      |        |
|                        |              |              |               |        |               |               |             |       |               |               | 0.15)   | 0.77)  | 0.70)  | 0.15)        |        |
| Low-middle             | 11.89 (6.81, | 11.62 (6.73, | -0.08 (-0.09, | <0.001 | —             | —             | —           | —     | 24.84 (17.64, | 25.90 (19.16, | 0.18    | 0.37   | 0.38   | 0.19 (0.03,  | 0.018  |
|                        | 18.40)       | 17.92)       | -0.08)        |        |               |               |             |       | 33.63)        | 34.11)        | (0.03,  | (0.26, | (0.28, | 0.34)        |        |
|                        |              |              |               |        |               |               |             |       |               |               | 0.33)   | 0.50)  | 0.51)  |              |        |
| Low                    | 10.98 (6.32, | 10.95 (6.29, | -0.01 (-0.01, | <0.001 | —             | —             | —           | —     | 35.34 (20.75, | 37.24 (26.59, | 0.19    | 0.53   | 0.56   | 0.19 (0.04,  | 0.013  |
|                        | 17.00)       | 16.96)       | -0.01)        |        |               |               |             |       | 49.69)        | 52.12)        | (0.04,  | (0.31, | (0.40, | 0.34)        |        |



|                             |                      |                      |                      |        |                      |                     |                      |        |                         |                         |                      |        |                   |                   |                      |        |
|-----------------------------|----------------------|----------------------|----------------------|--------|----------------------|---------------------|----------------------|--------|-------------------------|-------------------------|----------------------|--------|-------------------|-------------------|----------------------|--------|
| America                     | (10.64, 28.31)       | (13.83, 28.40)       | 0.46                 |        | 128.51)              | 146.07)             | 0.94)                |        | (93.83, 122.03)         | 106.93)                 | (-0.69, -0.33)       |        | (1.24, 1.65)      | (0.96, 1.39)      | (-0.81, -0.46)       |        |
|                             |                      |                      | 0.000069             |        |                      |                     |                      |        |                         | 141.23                  | 1.54                 |        | 1.36              | 2.11              |                      |        |
| Central Asia                | 13.48 (7.73, 20.71)  | 13.48 (7.73, 20.71)  | (0.000063, 0.000076) | <0.001 | —                    | —                   | —                    | —      | 91.48 (72.97, 134.24)   | (103.22, 175.62)        | (0.13, 2.97)         | 0.032  | (1.09, 2.01)      | (1.54, 2.63)      | 1.55 (0.13, 2.99)    | 0.032  |
| Eastern Europe              | 16.98 (9.83, 26.59)  | 16.99 (9.83, 26.61)  | 0.00 (-0.00, 0.00)   | 0.458  | —                    | —                   | —                    | —      | 200.37 (169.64, 229.07) | 346.62 (215.55, 420.47) | 1.88 (1.12, 2.65)    | <0.001 | 2.99 (2.53, 3.43) | 5.20 (3.22, 6.31) | 1.89 (1.13, 2.66)    | <0.001 |
| Southern Sub-Saharan Africa | 11.18 (6.46, 17.17)  | 11.15 (6.44, 17.16)  | -0.01 (-0.01, -0.01) | <0.001 | —                    | —                   | —                    | —      | 67.80 (45.34, 99.88)    | 82.35 (54.95, 121.78)   | 0.68 (0.33, 1.04)    | <0.001 | 1.02 (0.68, 1.50) | 1.23 (0.82, 1.82) | 0.68 (0.33, 1.04)    | <0.001 |
| High-income Asia Pacific    | 22.46 (12.99, 35.26) | 23.39 (13.82, 36.96) | 0.14 (0.12, 0.16)    | <0.001 | 18.16 (10.74, 27.58) | 16.12 (9.41, 24.15) | -0.42 (-0.61, -0.24) | <0.001 | 71.77 (63.30, 93.05)    | 36.77 (31.02, 51.08)    | -2.27 (-2.57, -1.97) | <0.001 | 1.01 (0.89, 1.33) | 0.49 (0.41, 0.70) | -2.46 (-2.80, -2.13) | <0.001 |
| Central Europe              | 18.84 (11.08, 28.71) | 19.18 (11.42, 29.16) | 0.08 (0.05, 0.11)    | <0.001 | —                    | —                   | —                    | —      | 68.80 (60.25, 89.45)    | 56.52 (42.98, 69.14)    | -0.67 (-0.94, -0.40) | <0.001 | 1.01 (0.88, 1.33) | 0.83 (0.63, 1.02) | -0.69 (-0.97, -0.41) | <0.001 |
| Andean Latin America        | 9.47 (5.37, 14.89)   | 9.45 (5.38, 14.90)   | -0.01 (-0.01, -0.00) | <0.001 | —                    | —                   | —                    | —      | 31.69 (20.41, 49.69)    | 29.02 (18.25, 42.69)    | -0.16 (-0.52, 0.20)  | 0.379  | 0.47 (0.30, 0.73) | 0.43 (0.26, 0.63) | -0.17 (-0.54, 0.20)  | 0.365  |
| Caribbean                   | 9.63 (5.41, 15.33)   | 9.63 (5.41, 15.33)   | 0.00 (0.00, 0.00)*   | <0.001 | —                    | —                   | —                    | —      | 51.67 (40.19, 68.21)    | 52.61 (36.03, 77.94)    | 0.15 (-0.12, 0.42)   | 0.269  | 0.76 (0.59, 1.01) | 0.78 (0.53, 1.15) | 0.15 (-0.12, 0.43)   | 0.278  |
| Southern Latin America      | 13.51 (7.72, 20.77)  | 13.51 (7.72, 20.77)  | 0.00 (-0.00, 0.00)   | 0.836  | 8.71 (2.05, 17.89)   | 2.73 (0.00, 7.94)   | -3.98 (-5.73, -2.19) | <0.001 | 71.77 (54.61, 97.96)    | 54.82 (42.43, 73.69)    | -0.93 (-1.32, -0.54) | <0.001 | 1.03 (0.77, 1.42) | 0.78 (0.60, 1.07) | -0.95 (-1.36, -0.55) | <0.001 |
| Oceania                     | 13.67 (7.74, 21.75)  | 13.67 (7.74, 21.75)  | 0.00 (0.00, 0.00)*   | <0.001 | —                    | —                   | —                    | —      | 38.63 (20.47, 71.21)    | 46.65 (22.85, 88.79)    | 0.52 (0.29, 0.74)    | <0.001 | 0.57 (0.30, 1.06) | 0.69 (0.34, 1.32) | 0.53 (0.30, 0.75)    | <0.001 |
| Australasia                 | 15.41 (8.96, 23.76)  | 15.60 (9.25, 23.83)  | 0.04 (0.03, 0.06)    | <0.001 | —                    | —                   | —                    | —      | 99.04 (77.12, 118.77)   | 50.05 (37.95, 64.08)    | -2.30 (-2.88, -1.71) | <0.001 | 1.44 (1.11, 1.74) | 0.71 (0.54, 0.93) | -2.36 (-2.97, -1.75) | <0.001 |

**25-29 years**

| Women                        |                    |                    |                      |        |                      |                      |                      |        |                        |                      |                      |        |                   |                   |                      |        |
|------------------------------|--------------------|--------------------|----------------------|--------|----------------------|----------------------|----------------------|--------|------------------------|----------------------|----------------------|--------|-------------------|-------------------|----------------------|--------|
| Global                       | 8.67 (4.66, 14.31) | 8.45 (4.60, 13.79) | -0.09 (-0.10, -0.08) | <0.001 | 6.10 (3.67, 9.13)    | 4.82 (2.91, 7.29)    | -0.69 (-1.04, -0.33) | <0.001 | 33.51 (26.56, 45.42)   | 27.65 (22.21, 31.93) | -0.59 (-1.05, -0.14) | 0.011  | 0.52 (0.41, 0.71) | 0.43 (0.34, 0.50) | -0.60 (-1.06, -0.14) | 0.011  |
| SDI category                 |                    |                    |                      |        |                      |                      |                      |        |                        |                      |                      |        |                   |                   |                      |        |
| High                         | 8.30 (4.43, 13.67) | 7.92 (4.45, 12.66) | -0.16 (-0.19, -0.14) | <0.001 | 39.65 (23.83, 59.49) | 43.81 (26.44, 66.12) | 0.43 (0.20, 0.66)    | <0.001 | 45.76 (40.78, 52.27)   | 34.16 (29.64, 39.84) | -0.98 (-1.21, -0.76) | <0.001 | 0.64 (0.57, 0.72) | 0.45 (0.40, 0.51) | -1.17 (-1.40, -0.93) | <0.001 |
| High-middle                  | 8.37 (4.47, 13.83) | 7.94 (4.33, 12.96) | -0.18 (-0.21, -0.15) | <0.001 | 0.23 (0.10, 0.42)    | 0.22 (0.11, 0.39)    | 0.07 (-1.03, 1.19)   | 0.897  | 43.41 (38.00, 58.41)   | 46.58 (34.03, 56.18) | 0.15 (-1.48, 1.81)   | 0.857  | 0.69 (0.60, 0.93) | 0.74 (0.54, 0.90) | 0.16 (-1.48, 1.84)   | 0.846  |
| Middle                       | 8.79 (4.76, 14.44) | 8.38 (4.54, 13.72) | -0.16 (-0.17, -0.15) | <0.001 | —                    | —                    | —                    | —      | 26.26 (19.51, 41.17)   | 20.73 (15.50, 25.65) | -0.67 (-1.23, -0.10) | 0.022  | 0.42 (0.31, 0.66) | 0.33 (0.25, 0.41) | -0.68 (-1.26, -0.10) | 0.021  |
| Low-middle                   | 9.01 (4.85, 14.77) | 8.91 (4.80, 14.64) | -0.04 (-0.04, -0.04) | <0.001 | —                    | —                    | —                    | —      | 22.47 (13.49, 31.72)   | 19.38 (13.95, 24.54) | -0.45 (-0.79, -0.11) | 0.010  | 0.36 (0.21, 0.51) | 0.31 (0.22, 0.39) | -0.45 (-0.80, -0.11) | 0.010  |
| Low                          | 8.90 (4.76, 14.72) | 8.84 (4.72, 14.62) | -0.02 (-0.02, -0.02) | <0.001 | —                    | —                    | —                    | —      | 39.91 (15.47, 62.78)   | 29.52 (18.23, 41.49) | -1.04 (-1.12, -0.95) | <0.001 | 0.64 (0.25, 1.02) | 0.48 (0.29, 0.67) | -1.05 (-1.13, -0.96) | <0.001 |
| 21 GBD region                |                    |                    |                      |        |                      |                      |                      |        |                        |                      |                      |        |                   |                   |                      |        |
| South Asia                   | 9.32 (5.00, 15.36) | 9.32 (5.00, 15.37) | 0.00 (0.00, 0.00)*   | 0.012  | —                    | —                    | —                    | —      | 7.13 (3.28, 12.03)     | 6.32 (3.92, 9.12)    | -0.40 (-0.81, 0.01)  | 0.057  | 0.11 (0.05, 0.19) | 0.10 (0.06, 0.15) | -0.41 (-0.83, 0.01)  | 0.059  |
| East Asia                    | 9.21 (4.96, 15.12) | 8.17 (4.53, 13.16) | -0.43 (-0.47, -0.38) | <0.001 | —                    | —                    | —                    | —      | 20.92 (13.71, 41.21)   | 16.07 (9.65, 22.10)  | -0.68 (-1.84, 0.50)  | 0.257  | 0.33 (0.21, 0.66) | 0.25 (0.14, 0.35) | -0.71 (-1.90, 0.50)  | 0.247  |
| North Africa and Middle East | 7.36 (3.86, 12.44) | 7.34 (3.85, 12.43) | -0.01 (-0.01, -0.00) | <0.001 | —                    | —                    | —                    | —      | 27.97 (16.53, 48.34)   | 19.18 (12.97, 32.09) | -1.28 (-1.36, -1.21) | <0.001 | 0.44 (0.25, 0.78) | 0.30 (0.20, 0.51) | -1.32 (-1.40, -1.24) | <0.001 |
| Western Sub-Saharan Africa   | 8.98 (4.81, 14.87) | 8.99 (4.81, 14.88) | 0.00 (0.00, 0.00)*   | <0.001 | —                    | —                    | —                    | —      | 104.71 (42.18, 169.39) | 67.73 (41.59, 96.08) | -1.50 (-1.62, -1.38) | <0.001 | 1.69 (0.68, 2.74) | 1.09 (0.67, 1.55) | -1.50 (-1.62, -1.39) | <0.001 |

|                             |                    |                    |                            |        |                        |                        |                    |       |                         |                         |                      |        |                   |                   |                      |        |
|-----------------------------|--------------------|--------------------|----------------------------|--------|------------------------|------------------------|--------------------|-------|-------------------------|-------------------------|----------------------|--------|-------------------|-------------------|----------------------|--------|
| Southeast Asia              | 7.79 (4.25, 12.72) | 7.79 (4.20, 12.71) | 0.00 (-0.00, 0.00)         | 0.830  | —                      | —                      | —                  | —     | 28.35 (15.13, 46.90)    | 26.45 (16.31, 35.51)    | -0.18 (-0.28, -0.09) | <0.001 | 0.45 (0.23, 0.76) | 0.42 (0.25, 0.57) | -0.19 (-0.28, -0.10) | <0.001 |
| Eastern Sub-Saharan Africa  | 8.93 (4.77, 14.77) | 8.93 (4.77, 14.77) | -0.00 (-0.00, 0.00)        | 0.236  | —                      | —                      | —                  | —     | 24.17 (11.62, 46.59)    | 18.49 (11.72, 27.65)    | -0.91 (-1.12, -0.69) | <0.001 | 0.39 (0.19, 0.75) | 0.30 (0.19, 0.44) | -0.92 (-1.14, -0.71) | <0.001 |
| Central Latin America       | 8.19 (4.32, 13.63) | 8.17 (4.31, 13.59) | -0.01 (-0.01, -0.00)       | <0.001 | —                      | —                      | —                  | —     | 16.00 (13.63, 19.96)    | 13.71 (10.09, 17.49)    | -0.55 (-1.04, -0.06) | 0.029  | 0.25 (0.21, 0.31) | 0.21 (0.15, 0.27) | -0.57 (-1.07, -0.06) | 0.028  |
| Tropical Latin America      | 8.59 (4.53, 14.48) | 8.59 (4.53, 14.46) | -0.0037 (-0.0038, -0.0035) | <0.001 | —                      | —                      | —                  | —     | 65.77 (52.15, 74.27)    | 36.89 (31.61, 43.27)    | -1.95 (-2.22, -1.68) | <0.001 | 1.05 (0.83, 1.19) | 0.58 (0.49, 0.68) | -1.99 (-2.27, -1.72) | <0.001 |
| Central Sub-Saharan Africa  | 8.61 (4.47, 14.50) | 8.61 (4.47, 14.50) | 0.00 (-0.00, 0.00)         | 1.000  | —                      | —                      | —                  | —     | 56.43 (17.61, 104.64)   | 46.68 (19.88, 82.16)    | -0.68 (-0.82, -0.55) | <0.001 | 0.91 (0.28, 1.69) | 0.75 (0.32, 1.33) | -0.69 (-0.82, -0.55) | <0.001 |
| Western Europe              | 7.61 (4.06, 12.46) | 7.53 (4.04, 12.27) | -0.04 (-0.07, -0.01)       | 0.006  | 0.35 (0.07, 0.75)      | 0.01 (0.00, 0.03)      | —                  | —     | 27.33 (23.17, 30.70)    | 13.92 (12.11, 17.19)    | -2.30 (-2.56, -2.04) | <0.001 | 0.41 (0.34, 0.46) | 0.20 (0.17, 0.25) | -2.42 (-2.70, -2.15) | <0.001 |
| High-income North America   | 8.65 (4.55, 14.39) | 8.16 (4.80, 12.75) | -0.21 (-0.25, -0.16)       | <0.001 | 110.10 (65.96, 164.32) | 115.83 (69.92, 175.04) | 0.30 (-0.00, 0.60) | 0.051 | 69.45 (60.23, 80.27)    | 60.66 (48.54, 72.94)    | -0.42 (-0.78, -0.06) | 0.021  | 0.92 (0.80, 1.00) | 0.77 (0.61, 0.88) | -0.57 (-0.97, -0.18) | 0.004  |
| Central Asia                | 8.74 (4.60, 14.62) | 8.74 (4.60, 14.62) | 0.00 (0.00, 0.00)*         | <0.001 | —                      | —                      | —                  | —     | 70.63 (54.48, 104.21)   | 99.56 (75.71, 134.03)   | 1.11 (0.60, 1.62)    | <0.001 | 1.14 (0.88, 1.68) | 1.61 (1.22, 2.17) | 1.13 (0.61, 1.64)    | <0.001 |
| Eastern Europe              | 9.42 (5.08, 15.60) | 9.43 (5.08, 15.61) | 0.00 (0.00, 0.00)*         | 0.012  | —                      | —                      | —                  | —     | 116.48 (101.20, 151.58) | 230.55 (153.08, 297.27) | 2.46 (1.65, 3.28)    | <0.001 | 1.88 (1.63, 2.44) | 3.73 (2.47, 4.82) | 2.48 (1.67, 3.31)    | <0.001 |
| Southern Sub-Saharan Africa | 9.20 (4.94, 15.18) | 9.19 (4.94, 15.15) | -0.00 (-0.00, -0.00)*      | <0.001 | —                      | —                      | —                  | —     | 79.04 (47.50, 108.34)   | 48.89 (23.60, 84.27)    | -1.57 (-2.91, -0.20) | 0.024  | 1.28 (0.77, 1.76) | 0.79 (0.38, 1.36) | -1.57 (-2.93, -0.20) | 0.025  |
| High-income Asia Pacific    | 9.05 (4.83, 14.96) | 8.44 (4.64, 13.64) | -0.24 (-0.26, -0.23)       | <0.001 | 1.30 (0.40, 2.63)      | 0.09 (0.00, 0.21)      | —                  | —     | 36.55 (30.74, 46.57)    | 17.09 (13.97, 22.73)    | -2.60 (-2.93, -2.27) | <0.001 | 0.55 (0.46, 0.71) | 0.24 (0.19, 0.32) | -2.86 (-3.28, -2.44) | <0.001 |

|                        | 2019         | 2020         | Change        | 2019   | 2020          | Change        | 2019        | 2020   | 2019          | 2020          | Change  | 2019   | 2020   | Change       | 2019        | 2020   | Change |
|------------------------|--------------|--------------|---------------|--------|---------------|---------------|-------------|--------|---------------|---------------|---------|--------|--------|--------------|-------------|--------|--------|
| Central Europe         | 7.36 (3.93,  | 7.38 (3.95,  | -0.01 (-0.06, | 0.850  | —             | —             | —           | —      | 40.10 (34.22, | 24.40 (19.28, | -1.64   | 0.64   | 0.39   | -1.68        |             |        |        |
|                        | 12.22)       | 12.18)       | 0.05)         |        |               |               |             |        | 47.84)        | 30.96)        | (-2.03, | <0.001 | (0.54, | (0.30,       | (-2.07,     | <0.001 |        |
|                        |              |              |               |        |               |               |             |        |               |               | -1.25)  |        | 0.76)  | 0.49)        | (-1.28)     |        |        |
| Andean Latin America   | 7.58 (4.02,  | 7.62 (4.05,  | 0.02 (0.01,   | <0.001 | —             | —             | —           | —      | 18.08 (10.58, | 12.23 (7.63,  | -1.42   | 0.29   | 0.19   | -1.48        |             |        |        |
|                        | 12.63)       | 12.92)       | 0.02)         |        |               |               |             |        | 28.41)        | 19.17)        | (-1.77, | <0.001 | (0.17, | (0.12,       | (-1.83,     | <0.001 |        |
|                        |              |              |               |        |               |               |             |        |               |               | -1.07)  |        | 0.45)  | 0.30)        | (-1.11)     |        |        |
| Caribbean              | 7.75 (4.08,  | 7.75 (4.08,  | 0.00 (0.00,   | 0.188  | —             | —             | —           | —      | 45.43 (30.04, | 49.93 (27.42, | 0.44    | 0.73   | 0.80   | 0.46 (-0.04, |             |        |        |
|                        | 12.93)       | 12.93)       | 0.00)         |        |               |               |             |        | 72.54)        | 87.32)        | (-0.04, | 0.074  | (0.48, | (0.44,       | 0.95)       | 0.070  |        |
|                        |              |              |               |        |               |               |             |        |               |               | 0.93)   |        | 1.17)  | 1.41)        |             |        |        |
| Southern Latin America | 6.11 (3.23,  | 6.11 (3.23,  | 0.00 (-0.00,  | 0.835  | —             | —             | —           | —      | 43.01 (31.17, | 26.42 (20.28, | -1.65   | 0.66   | 0.40   | -1.70        |             |        |        |
|                        | 9.94)        | 9.94)        | 0.00)         |        |               |               |             |        | 59.61)        | 34.26)        | (-2.01, | <0.001 | (0.47, | (0.30,       | (-2.08,     | <0.001 |        |
|                        |              |              |               |        |               |               |             |        |               |               | -1.29)  |        | 0.94)  | 0.52)        | (-1.31)     |        |        |
| Oceania                | 7.99 (4.29,  | 7.99 (4.29,  | 0.00 (0.00,   | <0.001 | —             | —             | —           | —      | 51.83 (22.94, | 52.92 (18.89, | 0.06    | 0.84   | 0.86   | 0.06 (-0.12, |             |        |        |
|                        | 13.19)       | 13.19)       | 0.00)*        |        |               |               |             |        | 95.23)        | 107.80)       | (-0.12, | 0.534  | (0.37, | (0.30,       | 0.24)       | 0.514  |        |
|                        |              |              |               |        |               |               |             |        |               |               | 0.24)   |        | 1.54)  | 1.75)        |             |        |        |
| Australasia            | 7.04 (3.73,  | 7.02 (3.78,  | -0.01 (-0.01, | <0.001 | —             | —             | —           | —      | 50.63 (39.84, | 21.77 (16.39, | -2.85   | 0.77   | 0.32   | -2.97        |             |        |        |
|                        | 11.67)       | 11.59)       | -0.00)        |        |               |               |             |        | 61.53)        | 30.90)        | (-3.93, | <0.001 | (0.60, | (0.24,       | (-4.14,     | <0.001 |        |
|                        |              |              |               |        |               |               |             |        |               |               | -1.75)  |        | 0.95)  | 0.47)        | (-1.78)     |        |        |
| <b>Men</b>             |              |              |               |        |               |               |             |        |               |               |         |        |        |              |             |        |        |
| Global                 | 14.98 (8.51, | 14.03 (8.01, | -0.23 (-0.24, | <0.001 | 8.48 (5.18,   | 7.86 (4.93,   | -0.12       |        | 66.24 (59.15, | 67.05 (52.65, | 0.03    | 1.04   | 1.06   | 0.04 (-0.33, |             |        |        |
|                        | 24.10)       | 22.38)       | -0.21)        |        | 12.62)        | 11.67)        | (-0.50,     | 0.535  | 82.52)        | 75.67)        | (-0.32, | 0.851  | (0.93, | (0.83,       | 0.42)       | 0.818  |        |
|                        |              |              |               |        |               |               | 0.26)       |        |               |               | 0.39)   |        | 1.31)  | 1.20)        |             |        |        |
| <b>SDI category</b>    |              |              |               |        |               |               |             |        |               |               |         |        |        |              |             |        |        |
| High                   | 19.24        | 18.47        | -0.14 (-0.17, | <0.001 | 53.21 (32.50, | 67.35 (42.25, | 0.89 (0.60, |        | 98.77 (86.24, | 74.62 (63.76, | -0.97   | 1.47   | 1.07   | -1.11        |             |        |        |
|                        | (11.02,      | (11.23,      | -0.10)        |        | 79.23)        | 99.83)        | 1.19)       | <0.001 | 114.37)       | 85.55)        | (-1.12, | <0.001 | (1.27, | (0.89,       | (-1.34,     | <0.001 |        |
|                        | 30.92)       | 28.04)       |               |        |               |               |             |        |               | -0.82)        |         | 1.73)  | 1.22)  | (-0.88)      |             |        |        |
| High-middle            | 15.83 (8.96, | 15.14 (8.68, | -0.15 (-0.17, | <0.001 | 0.93 (0.39,   | 0.65 (0.28,   | -1.04       |        | 118.82        | 159.68        | 1.00    | 1.90   | 2.57   | 1.02 (0.36,  |             |        |        |
|                        | 25.50)       | 24.16)       | -0.14)        |        | 1.64)         | 1.11)         | (-3.96,     | 0.493  | (107.18,      | (110.12,      | (0.35,  | 0.003  | (1.72, | (1.77,       | 1.68)       | 0.002  |        |
|                        |              |              |               |        |               |               | 1.97)       |        | 151.16)       | 184.10)       | 1.66)   |        | 2.42)  | 2.97)        |             |        |        |
| Middle                 | 14.30 (8.06, | 13.58 (7.75, | -0.18 (-0.20, | <0.001 | —             | —             | —           | —      | 40.03 (33.54, | 40.76 (31.82, | 0.08    | 0.64   | 0.65   | 0.07 (-0.06, |             |        |        |
|                        | 23.11)       | 21.75)       | -0.16)        |        |               |               |             |        | 58.19)        | 52.16)        | (-0.05, | 0.229  | (0.53, | (0.51,       | 0.20)       | 0.259  |        |
|                        |              |              |               |        |               |               |             |        |               |               | 0.21)   |        | 0.93)  | 0.83)        |             |        |        |
| Low-middle             | 12.93 (7.10, | 12.69 (6.96, | -0.06 (-0.07, | <0.001 | —             | —             | —           | —      | 30.30 (22.55, | 33.31 (24.69, | 0.34    | <0.001 | 0.48   | 0.53         | 0.34 (0.22, | <0.001 |        |
|                        |              |              |               |        |               |               |             |        |               |               |         |        |        |              |             |        |        |

|                              |                     |                     |                       |        |                   |   |   |   |                         |                        |                      |                   |                   |                      |        |
|------------------------------|---------------------|---------------------|-----------------------|--------|-------------------|---|---|---|-------------------------|------------------------|----------------------|-------------------|-------------------|----------------------|--------|
|                              | 20.88)              | 20.50)              | -0.05)                |        |                   |   |   |   | 41.20)                  | 41.82)                 | (0.22, 0.46)         | (0.36, 0.66)      | (0.40, 0.67)      | 0.47)                |        |
| Low                          | 12.30 (6.64, 20.01) | 12.21 (6.59, 19.86) | -0.02 (-0.03, -0.02)  | <0.001 | —                 | — | — | — | 53.63 (33.08, 71.63)    | 56.25 (39.60, 74.97)   | 0.17 (0.03, 0.32)    | 0.87 (0.53, 1.16) | 0.91 (0.64, 1.21) | 0.17 (0.02, 0.32)    | 0.022  |
| <b>21 GBD region</b>         |                     |                     |                       |        |                   |   |   |   |                         |                        |                      |                   |                   |                      |        |
| South Asia                   | 12.79 (6.80, 20.86) | 12.81 (6.81, 20.89) | 0.00 (0.00, 0.00)*    | <0.001 | —                 | — | — | — | 11.56 (7.44, 15.81)     | 13.15 (8.96, 18.05)    | 0.45 (0.03, 0.87)    | 0.18 (0.12, 0.25) | 0.21 (0.14, 0.29) | 0.46 (0.04, 0.89)    | 0.034  |
| East Asia                    | 16.02 (8.89, 25.77) | 15.40 (8.94, 23.85) | -0.14 (-0.15, -0.13)  | <0.001 | —                 | — | — | — | 31.74 (24.12, 50.67)    | 32.98 (21.38, 42.15)   | 0.17 (-0.10, 0.44)   | 0.50 (0.38, 0.81) | 0.52 (0.33, 0.66) | 0.16 (-0.12, 0.45)   | 0.269  |
| North Africa and Middle East | 10.77 (6.02, 17.49) | 10.73 (6.00, 17.43) | -0.01 (-0.02, -0.01)  | <0.001 | 0.07 (0.02, 0.15) | — | — | — | 50.64 (35.85, 90.09)    | 38.70 (26.18, 65.41)   | -0.92 (-1.12, -0.70) | 0.79 (0.55, 1.44) | 0.60 (0.40, 1.04) | -0.95 (-1.17, -0.74) | <0.001 |
| Western Sub-Saharan Africa   | 12.35 (6.66, 20.12) | 12.30 (6.63, 20.05) | -0.01 (-0.01, -0.01)  | <0.001 | —                 | — | — | — | 91.65 (54.75, 130.83)   | 86.23 (58.74, 118.25)  | -0.20 (-0.35, -0.04) | 1.48 (0.88, 2.12) | 1.40 (0.95, 1.92) | -0.20 (-0.35, -0.05) | 0.010  |
| Southeast Asia               | 13.76 (7.74, 21.84) | 13.79 (7.81, 22.15) | 0.01 (0.00, 0.01)     | <0.001 | —                 | — | — | — | 42.40 (31.12, 70.78)    | 47.11 (33.17, 63.99)   | 0.38 (0.08, 0.69)    | 0.67 (0.49, 1.14) | 0.75 (0.52, 1.02) | 0.37 (0.08, 0.66)    | 0.012  |
| Eastern Sub-Saharan Africa   | 12.23 (6.61, 19.95) | 12.25 (6.62, 19.97) | 0.00 (0.00, 0.01)     | <0.001 | —                 | — | — | — | 68.69 (44.24, 93.43)    | 68.93 (37.69, 101.85)  | -0.02 (-0.21, 0.18)  | 1.11 (0.71, 1.51) | 1.11 (0.61, 1.65) | -0.02 (-0.21, 0.18)  | 0.859  |
| Central Latin America        | 11.47 (6.25, 18.62) | 11.45 (6.25, 18.61) | -0.00 (-0.01, -0.00)  | 0.001  | —                 | — | — | — | 30.94 (26.08, 39.56)    | 28.40 (21.06, 35.21)   | -0.22 (-0.46, 0.01)  | 0.49 (0.41, 0.63) | 0.45 (0.33, 0.56) | -0.23 (-0.46, 0.01)  | 0.062  |
| Tropical Latin America       | 11.97 (6.43, 19.37) | 11.96 (6.42, 19.35) | -0.00 (-0.00, -0.00)* | <0.001 | —                 | — | — | — | 140.74 (108.37, 160.97) | 113.18 (83.99, 130.69) | -0.75 (-0.96, -0.54) | 2.26 (1.74, 2.59) | 1.81 (1.33, 2.09) | -0.76 (-0.97, -0.55) | <0.001 |
| Central Sub-Saharan Africa   | 11.79 (6.37, 19.28) | 11.79 (6.37, 19.28) | 0.00 (0.00, 0.00)*    | <0.001 | —                 | — | — | — | 89.08 (37.83, 161.76)   | 93.44 (48.82, 155.64)  | 0.16 (-0.07, 0.38)   | 1.44 (0.61, 2.62) | 1.51 (0.79, 2.52) | 0.16 (-0.07, 0.38)   | 0.180  |

|                             |                      |                      |                             |        |                        |                         |                      |        |                         |                          |                      |        |                   |                      |                      |        |
|-----------------------------|----------------------|----------------------|-----------------------------|--------|------------------------|-------------------------|----------------------|--------|-------------------------|--------------------------|----------------------|--------|-------------------|----------------------|----------------------|--------|
|                             | 18.17                | 18.14                |                             |        |                        |                         |                      |        |                         |                          |                      |        |                   |                      |                      |        |
| Western Europe              | (10.30, 28.69)       | (10.24, 28.53)       | -0.01 (-0.02, 0.00)         | 0.227  | 3.65 (0.95, 7.40)      | 1.10 (0.58, 1.75)       | -3.57 (-7.74, 0.79)  | 0.107  | 69.31 (55.92, 84.25)    | 43.63 (34.39, 52.01)     | -1.62 (-1.89, -1.35) | <0.001 | 1.07 (0.85, 1.30) | 0.66 (0.52, 0.81)    | -1.68 (-1.97, -1.38) | <0.001 |
| High-income North America   | 20.15 (11.39, 32.74) | 20.09 (13.00, 28.90) | -0.00 (-0.04, 0.03)         | 0.813  | 136.59 (81.47, 202.87) | 177.09 (110.43, 263.81) | 0.97 (0.64, 1.30)    | <0.001 | 140.54 (117.07, 159.35) | 116.44 (90.64, 139.15)   | -0.64 (-0.91, -0.36) | <0.001 | 2.02 (1.64, 2.31) | 1.58 (1.19, 1.89)    | -0.86 (-1.22, -0.51) | <0.001 |
| Central Asia                | 15.11 (8.54, 24.79)  | 15.11 (8.53, 24.77)  | -0.000 (-0.00030, -0.00022) | <0.001 | —                      | —                       | —                    | —      | 126.93 (98.77, 197.67)  | 238.14 (158.23, 295.21)  | 2.23 (1.58, 2.88)    | <0.001 | 2.04 (1.59, 3.19) | 3.85 (2.56, 4.78)    | 2.24 (1.59, 2.90)    | <0.001 |
| Eastern Europe              | 17.91 (10.22, 29.05) | 17.91 (10.22, 29.07) | 0.00 (-0.00, 0.00)          | 0.897  | —                      | —                       | —                    | —      | 409.19 (355.31, 512.36) | 949.76 (631.17, 1122.11) | 3.08 (2.10, 4.08)    | <0.001 | 6.62 (5.74, 8.30) | 15.41 (10.23, 18.21) | 3.10 (2.11, 4.09)    | <0.001 |
| Southern Sub-Saharan Africa | 12.64 (6.82, 20.54)  | 12.63 (6.81, 20.53)  | -0.00 (-0.00, 0.00)         | 0.043  | —                      | —                       | —                    | —      | 95.07 (64.58, 137.00)   | 88.64 (58.60, 128.92)    | -0.36 (-0.67, -0.04) | 0.027  | 1.54 (1.04, 2.22) | 1.43 (0.94, 2.09)    | -0.36 (-0.68, -0.04) | 0.026  |
| High-income Asia Pacific    | 22.54 (13.05, 35.50) | 22.02 (13.16, 33.61) | -0.09 (-0.10, -0.07)        | <0.001 | 20.60 (10.95, 32.87)   | 17.62 (9.55, 27.63)     | -0.58 (-0.78, -0.38) | <0.001 | 86.55 (76.87, 112.93)   | 46.20 (38.62, 65.93)     | -2.16 (-2.49, -1.82) | <0.001 | 1.32 (1.17, 1.76) | 0.67 (0.56, 1.00)    | -2.30 (-2.62, -1.97) | <0.001 |
| Central Europe              | 21.08 (12.07, 33.58) | 21.33 (12.20, 34.00) | 0.04 (-0.03, 0.12)          | 0.240  | —                      | —                       | —                    | —      | 95.95 (83.03, 123.69)   | 84.34 (63.17, 101.68)    | -0.44 (-0.65, -0.23) | <0.001 | 1.53 (1.32, 1.98) | 1.34 (1.00, 1.62)    | -0.45 (-0.67, -0.24) | <0.001 |
| Andean Latin America        | 10.88 (5.95, 18.03)  | 10.88 (5.94, 18.05)  | 0.00 (-0.00, 0.00)          | 0.692  | —                      | —                       | —                    | —      | 34.07 (22.15, 50.70)    | 33.80 (21.69, 49.25)     | -0.00 (-0.21, 0.20)  | 0.963  | 0.54 (0.35, 0.81) | 0.54 (0.34, 0.79)    | -0.01 (-0.22, 0.20)  | 0.904  |
| Caribbean                   | 10.92 (6.04, 17.87)  | 10.92 (6.04, 17.87)  | 0.00 (0.00, 0.00)*          | <0.001 | —                      | —                       | —                    | —      | 73.69 (58.06, 101.27)   | 79.68 (56.26, 116.73)    | 0.34 (0.01, 0.67)    | 0.046  | 1.18 (0.93, 1.62) | 1.28 (0.89, 1.88)    | 0.34 (0.00, 0.67)    | 0.048  |
| Southern Latin America      | 15.20 (8.37, 25.37)  | 15.20 (8.37, 25.37)  | 0.00 (-0.00, 0.00)          | 0.907  | 18.25 (6.19, 35.46)    | 7.41 (1.66, 15.40)      | -2.99 (-3.37, -2.62) | <0.001 | 86.93 (65.98, 114.00)   | 70.50 (54.74, 89.85)     | -0.68 (-0.99, -0.37) | <0.001 | 1.35 (1.01, 1.79) | 1.09 (0.84, 1.41)    | -0.68 (-1.00, -0.36) | <0.001 |
| Oceania                     | 13.81 (7.54, 22.11)  | 13.81 (7.54, 22.11)  | 0.00 (0.00, 0.00)*          | <0.001 | —                      | —                       | —                    | —      | 70.41 (38.98, 130.84)   | 86.10 (43.25, 163.31)    | 0.69 (0.55, 0.82)    | <0.001 | 1.13 (0.62, 2.11) | 1.39 (0.69, 2.64)    | 0.70 (0.56, 0.83)    | <0.001 |



|                                 |                        |                            |                         |        |                         |                         |                            |        |                              |                          |                            |        |                         |                         |                            |        |
|---------------------------------|------------------------|----------------------------|-------------------------|--------|-------------------------|-------------------------|----------------------------|--------|------------------------------|--------------------------|----------------------------|--------|-------------------------|-------------------------|----------------------------|--------|
| Australasia                     | 17.68 (9.77,<br>29.04) | 17.97<br>(10.29,<br>28.95) | 0.06 (0.05,<br>0.07)    | <0.001 | 0.26 (0.00,<br>0.63)    | —                       | —                          | —      | 127.49<br>(99.15,<br>154.58) | 76.90 (58.23,<br>100.20) | -1.62<br>(-2.53,<br>-0.70) | 0.001  | 2.00<br>(1.54,<br>2.46) | 1.20<br>(0.89,<br>1.57) | -1.64<br>(-2.59,<br>-0.69) | 0.001  |
| <b>30-34 years</b>              |                        |                            |                         |        |                         |                         |                            |        |                              |                          |                            |        |                         |                         |                            |        |
| <b>Women</b>                    |                        |                            |                         |        |                         |                         |                            |        |                              |                          |                            |        |                         |                         |                            |        |
| Global                          | 9.56 (5.78,<br>15.06)  | 9.37 (5.71,<br>14.67)      | -0.07 (-0.09,<br>-0.04) | <0.001 | 8.24 (4.58,<br>12.85)   | 5.34 (2.95,<br>8.53)    | -1.44<br>(-1.84,<br>-1.03) | <0.001 | 42.67 (35.18,<br>57.15)      | 37.82 (30.49,<br>43.56)  | -0.40<br>(-1.21,<br>0.42)  | 0.338  | 0.72<br>(0.59,<br>0.98) | 0.65<br>(0.52,<br>0.75) | -0.37<br>(-1.22,<br>0.48)  | 0.389  |
| <b>SDI category</b>             |                        |                            |                         |        |                         |                         |                            |        |                              |                          |                            |        |                         |                         |                            |        |
| High                            | 9.44 (5.79,<br>14.73)  | 8.89 (5.61,<br>13.53)      | -0.21 (-0.23,<br>-0.19) | <0.001 | 47.51 (26.44,<br>74.25) | 45.97 (25.34,<br>73.48) | -0.03<br>(-0.26,<br>0.20)  | 0.773  | 55.11 (48.93,<br>62.72)      | 41.48 (35.00,<br>48.19)  | -0.96<br>(-1.36,<br>-0.56) | <0.001 | 0.85<br>(0.77,<br>0.95) | 0.62<br>(0.53,<br>0.69) | -1.07<br>(-1.40,<br>-0.73) | <0.001 |
| High-middle                     | 9.23 (5.55,<br>14.52)  | 8.90 (5.43,<br>13.74)      | -0.13 (-0.15,<br>-0.10) | <0.001 | 0.28 (0.11,<br>0.49)    | 0.21 (0.09,<br>0.37)    | -1.17<br>(-2.15,<br>-0.19) | 0.020  | 66.32 (58.20,<br>91.72)      | 88.43 (64.04,<br>107.16) | 0.99<br>(0.10,<br>1.88)    | 0.028  | 1.16<br>(1.01,<br>1.60) | 1.55<br>(1.12,<br>1.88) | 1.01 (0.11,<br>1.91)       | 0.027  |
| Middle                          | 9.51 (5.76,<br>14.90)  | 9.26 (5.63,<br>14.56)      | -0.10 (-0.12,<br>-0.08) | <0.001 | —                       | —                       | —                          | —      | 30.78 (23.19,<br>49.72)      | 21.94 (16.98,<br>28.70)  | -1.12<br>(-1.33,<br>-0.91) | <0.001 | 0.54<br>(0.40,<br>0.87) | 0.38<br>(0.29,<br>0.50) | -1.14<br>(-1.35,<br>-0.93) | <0.001 |
| Low-middle                      | 9.98 (6.00,<br>15.77)  | 9.92 (5.99,<br>15.65)      | -0.02 (-0.02,<br>-0.02) | <0.001 | —                       | —                       | —                          | —      | 24.36 (14.82,<br>35.53)      | 20.70 (14.42,<br>26.40)  | -0.52<br>(-0.79,<br>-0.24) | <0.001 | 0.43<br>(0.26,<br>0.62) | 0.36<br>(0.25,<br>0.46) | -0.52<br>(-0.81,<br>-0.24) | <0.001 |
| Low                             | 9.94 (5.92,<br>15.85)  | 9.87 (5.89,<br>15.76)      | -0.02 (-0.02,<br>-0.02) | <0.001 | —                       | —                       | —                          | —      | 35.40 (14.74,<br>57.27)      | 26.64 (16.67,<br>38.42)  | -1.00<br>(-1.08,<br>-0.92) | <0.001 | 0.62<br>(0.26,<br>1.01) | 0.46<br>(0.29,<br>0.67) | -1.01<br>(-1.09,<br>-0.94) | <0.001 |
| <b>21 GBD region</b>            |                        |                            |                         |        |                         |                         |                            |        |                              |                          |                            |        |                         |                         |                            |        |
| South Asia                      | 10.45 (6.27,<br>16.39) | 10.45 (6.27,<br>16.39)     | 0.00 (-0.00,<br>0.00)   | 0.256  | —                       | —                       | —                          | —      | 9.59 (4.46,<br>15.80)        | 8.39 (4.83,<br>12.05)    | -0.44<br>(-0.83,<br>-0.06) | 0.025  | 0.17<br>(0.08,<br>0.28) | 0.15<br>(0.08,<br>0.21) | -0.45<br>(-0.84,<br>-0.06) | 0.026  |
| East Asia                       | 9.75 (5.87,<br>15.36)  | 9.00 (5.61,<br>13.68)      | -0.27 (-0.31,<br>-0.23) | <0.001 | —                       | —                       | —                          | —      | 20.20 (13.50,<br>40.96)      | 14.69 (8.65,<br>20.54)   | -0.96<br>(-2.04,<br>0.13)  | 0.083  | 0.35<br>(0.23,<br>0.71) | 0.25<br>(0.14,<br>0.35) | -0.93<br>(-1.99,<br>0.14)  | 0.088  |
| North Africa and<br>Middle East | 8.15 (4.85,<br>12.91)  | 8.16 (4.85,<br>12.92)      | 0.00 (0.00,<br>0.01)    | 0.018  | —                       | —                       | —                          | —      | 34.00 (20.00,<br>60.01)      | 22.08 (14.78,<br>38.76)  | -1.47<br>(-1.59,<br>-0.92) | <0.001 | 0.59<br>(0.34,<br>0.84) | 0.38<br>(0.25,<br>0.51) | -1.52<br>(-1.64,<br>-1.40) | <0.001 |





|                                 |              |              |               |        |             |             |             |        |               |                |         |        |         |        |              |        |
|---------------------------------|--------------|--------------|---------------|--------|-------------|-------------|-------------|--------|---------------|----------------|---------|--------|---------|--------|--------------|--------|
| Middle                          | 14.79 (9.04, | 14.07 (8.61, | -0.17 (-0.19, | <0.001 | —           | —           | —           | —      | 49.66 (41.84, | 46.98 (37.03,  | -0.24   | 0.021  | 0.86    | 0.81   | -0.25        | 0.017  |
|                                 | 22.79)       | 21.62)       | -0.15)        |        |             |             |             |        | (-0.44,       | (0.73,         | (0.64,  |        | (-0.46, |        |              |        |
| Low-middle                      | 14.03 (8.50, | 13.82 (8.41, | -0.05 (-0.05, | <0.001 | 0.02 (0.00, | 0.03 (0.00, | 1.77 (1.45, | <0.001 | 36.38 (28.06, | 41.21 (30.75,  | 0.46    | <0.001 | 0.64    | 0.72   | 0.46 (0.30,  | <0.001 |
|                                 | 21.58)       | 21.29)       | -0.04)        |        | 0.04)       | 0.08)       | 2.09)       |        | (0.29,        | (0.49,         | (0.54,  |        | 0.63)   | (0.87) | 0.90)        |        |
| Low                             | 13.63 (8.23, | 13.52 (8.15, | -0.03 (-0.03, | <0.001 | —           | —           | —           | —      | 70.21 (41.42, | 69.68 (46.81,  | -0.02   | 0.561  | 1.23    | 1.22   | -0.03        | 0.530  |
|                                 | 21.11)       | 20.86)       | -0.03)        |        |             |             |             |        | (-0.11,       | (0.72,         | (0.82,  |        | (-0.11, |        |              |        |
| <b>21 GBD region</b>            |              |              |               |        |             |             |             |        |               |                |         |        |         |        |              |        |
| South Asia                      | 14.28 (8.67, | 14.30 (8.69, | 0.0040        | <0.001 | —           | —           | —           | —      | 11.71 (7.98,  | 12.72 (9.09,   | 0.29    | <0.001 | 0.20    | 0.22   | 0.28 (0.06,  | 0.013  |
|                                 | 22.18)       | 22.20)       | (0.0037,      |        |             |             |             |        | (0.13,        | (0.14,         | (0.16,  |        | 0.51)   |        |              |        |
| East Asia                       | 16.07 (9.81, | 14.78 (9.10, | -0.29 (-0.34, | <0.001 | —           | —           | —           | —      | 34.42 (25.90, | 37.51 (23.21,  | 0.32    | 0.213  | 0.59    | 0.65   | 0.32 (-0.20, | 0.235  |
|                                 | 24.94)       | 22.80)       | -0.23)        |        |             |             |             |        | (-0.18,       | (0.45,         | (0.39,  |        | 0.84)   |        |              |        |
| North Africa and<br>Middle East | 11.03 (6.64, | 11.03 (6.64, | 0.00 (-0.01,  | 0.991  | 2.29 (0.10, | 0.39 (0.07, | -5.79       | <0.001 | 48.00 (32.79, | 36.09 (25.85,  | -0.97   | <0.001 | 0.82    | 0.61   | -1.02        | <0.001 |
|                                 | 17.11)       | 17.11)       | 0.01)         |        | 5.93)       | 0.87)       | (-6.55,     |        | (-1.10,       | (0.55,         | (0.42,  |        | (-1.15, |        |              |        |
| Western<br>Sub-Saharan Africa   | 13.73 (8.30, | 13.66 (8.26, | -0.02 (-0.02, | <0.001 | —           | —           | —           | —      | 117.44        | 105.72 (69.60, | -0.35   | <0.001 | 2.07    | 1.86   | -0.35        | <0.001 |
|                                 | 21.26)       | 21.14)       | -0.02)        |        |             |             |             |        | (65.79,       | 145.45)        | (-0.52, |        | (1.15,  | (1.22, | (-0.52,      |        |
| Southeast Asia                  | 13.92 (8.51, | 13.88 (8.47, | -0.01 (-0.01, | <0.001 | —           | —           | —           | —      | 56.46 (41.87, | 58.75 (42.55,  | 0.15    | 0.082  | 0.98    | 1.01   | 0.15 (-0.02, | 0.094  |
|                                 | 21.69)       | 21.52)       | -0.01)        |        |             |             |             |        | 93.07)        | 84.10)         | (-0.02, |        | (0.72,  | (0.73, | 0.32)        |        |
| Eastern Sub-Saharan<br>Africa   | 13.56 (8.18, | 13.59 (8.21, | 0.01 (0.01,   | <0.001 | —           | —           | —           | —      | 95.95 (60.62, | 94.17 (53.30,  | -0.06   | 0.468  | 1.68    | 1.65   | -0.06        | 0.464  |
|                                 | 20.98)       | 21.02)       | 0.01)         |        |             |             |             |        | 129.40)       | 137.59)        | (-0.22, |        | (1.06,  | (0.93, | (-0.22,      |        |
| Central Latin<br>America        | 12.86 (7.81, | 12.86 (7.81, | 0.00 (-0.00,  | 0.577  | —           | —           | —           | —      | 35.49 (30.02, | 35.33 (24.25,  | 0.00    | 0.996  | 0.62    | 0.62   | 0.00 (-0.21, | 0.991  |
|                                 | 19.78)       | 19.78)       | 0.00)         |        |             |             |             |        | 45.32)        | 43.84)         | (-0.20, |        | (0.53,  | (0.42, | 0.22)        |        |
| Tropical Latin<br>America       | 13.50 (8.22, | 13.49 (8.21, | -0.0028       | <0.001 | —           | —           | —           | —      | 219.34        | 159.26         | -1.09   | <0.001 | 3.87    | 2.80   | -1.10        | <0.001 |
|                                 | 20.61)       | 20.59)       | (-0.0029,     |        |             |             |             |        | (158.31,      | (113.59,       | (-1.36, |        | (2.79,  | (2.00, | (-1.37,      |        |

|                             |                      |                      |                               |        |                        |                         |                      |        |                          |                            |                      |        |                      |                      |                      |        |
|-----------------------------|----------------------|----------------------|-------------------------------|--------|------------------------|-------------------------|----------------------|--------|--------------------------|----------------------------|----------------------|--------|----------------------|----------------------|----------------------|--------|
|                             |                      |                      | -0.0027)                      |        |                        |                         |                      |        | 250.99)                  | 186.95)                    | -0.82)               |        | 4.43)                | 3.29)                | -0.82)               |        |
| Central Sub-Saharan Africa  | 13.02 (7.80, 20.20)  | 13.02 (7.80, 20.20)  | 0.00 (0.00, 0.00)*            | 0.001  | —                      | —                       | —                    | —      | 117.18 (46.72, 216.83)   | 121.48 (62.06, 205.45)     | 0.12 (-0.01, 0.25)   | 0.080  | 2.06 (0.81, 3.82)    | 2.14 (1.09, 3.62)    | 0.12 (-0.01, 0.25)   | 0.082  |
| Western Europe              | 19.26 (11.90, 29.10) | 18.97 (11.58, 28.84) | -0.06 (-0.08, -0.03)          | <0.001 | 4.05 (1.04, 8.33)      | 1.27 (0.63, 2.07)       | -3.70 (-7.22, -0.04) | 0.048  | 84.08 (65.25, 100.88)    | 53.21 (41.73, 64.16)       | -1.59 (-1.85, -1.33) | <0.001 | 1.42 (1.09, 1.72)    | 0.89 (0.69, 1.09)    | -1.64 (-1.91, -1.36) | <0.001 |
| High-income North America   | 21.37 (13.06, 33.03) | 19.83 (13.25, 28.46) | -0.25 (-0.29, -0.21)          | <0.001 | 177.37 (96.78, 277.57) | 216.65 (122.00, 338.76) | 0.73 (0.39, 1.08)    | <0.001 | 193.00 (148.12, 218.11)  | 144.34 (109.16, 177.02)    | -1.01 (-1.41, -0.61) | <0.001 | 3.08 (2.35, 3.42)    | 2.15 (1.55, 2.63)    | -1.26 (-1.71, -0.81) | <0.001 |
| Central Asia                | 15.91 (9.61, 24.48)  | 15.91 (9.61, 24.50)  | -0.00046 (-0.00047, -0.00046) | <0.001 | —                      | —                       | —                    | —      | 205.79 (153.60, 353.23)  | 430.32 (274.88, 532.44)    | 2.48 (1.86, 3.11)    | <0.001 | 3.61 (2.68, 6.22)    | 7.58 (4.82, 9.37)    | 2.50 (1.88, 3.12)    | <0.001 |
| Eastern Europe              | 18.50 (11.50, 28.33) | 18.52 (11.51, 28.37) | 0.00 (0.00, 0.00)*            | 0.002  | —                      | —                       | —                    | —      | 719.22 (597.53, 1017.09) | 1768.86 (1201.79, 2100.99) | 3.30 (2.54, 4.06)    | <0.001 | 12.66 (10.52, 17.93) | 31.22 (21.20, 37.09) | 3.31 (2.55, 4.07)    | <0.001 |
| Southern Sub-Saharan Africa | 14.10 (8.56, 21.85)  | 14.11 (8.56, 21.85)  | 0.00 (0.00, 0.00)*            | <0.001 | —                      | —                       | —                    | —      | 142.29 (101.90, 200.66)  | 110.96 (74.27, 166.90)     | -0.81 (-1.56, -0.06) | 0.035  | 2.50 (1.79, 3.53)    | 1.95 (1.30, 2.94)    | -0.81 (-1.56, -0.06) | 0.034  |
| High-income Asia Pacific    | 22.32 (13.63, 34.31) | 20.95 (13.06, 31.85) | -0.22 (-0.26, -0.19)          | <0.001 | 24.41 (12.38, 39.64)   | 20.19 (10.03, 32.94)    | -0.63 (-0.86, -0.40) | <0.001 | 90.62 (79.47, 125.12)    | 52.79 (43.33, 80.47)       | -1.84 (-2.08, -1.59) | <0.001 | 1.50 (1.32, 2.09)    | 0.84 (0.69, 1.34)    | -1.97 (-2.26, -1.68) | <0.001 |
| Central Europe              | 21.65 (13.33, 33.31) | 21.91 (13.49, 33.73) | 0.03 (0.01, 0.06)             | 0.004  | —                      | —                       | —                    | —      | 168.60 (134.04, 207.37)  | 145.74 (102.88, 176.24)    | -0.55 (-0.79, -0.30) | <0.001 | 2.94 (2.33, 3.63)    | 2.53 (1.79, 3.07)    | -0.56 (-0.81, -0.31) | <0.001 |
| Andean Latin America        | 12.16 (7.29, 19.18)  | 12.18 (7.30, 19.20)  | 0.00 (0.00, 0.00)*            | <0.001 | —                      | —                       | —                    | —      | 32.02 (21.05, 46.98)     | 29.34 (17.77, 43.89)       | -0.33 (-0.54, -0.12) | 0.002  | 0.56 (0.37, 0.83)    | 0.51 (0.31, 0.77)    | -0.35 (-0.56, -0.14) | 0.001  |
| Caribbean                   | 12.18 (7.31, 18.95)  | 12.18 (7.31, 18.95)  | 0.00 (0.00, 0.00)*            | <0.001 | —                      | —                       | —                    | —      | 101.52 (78.31, 143.92)   | 112.64 (81.08, 161.52)     | 0.43 (0.28, 0.57)    | <0.001 | 1.77 (1.36, 2.52)    | 1.97 (1.41, 2.83)    | 0.43 (0.28, 0.57)    | <0.001 |
| Southern Latin America      | 16.29 (9.81, 25.51)  | 16.29 (9.81, 25.51)  | -0.00 (-0.00, 0.00)           | 0.709  | —                      | —                       | —                    | —      | 113.10 (86.22, 124.38)   | 96.89 (73.68, 124.38)      | -0.51 (-0.81, -0.21) | 0.001  | 1.99 (1.51, 2.52)    | 1.69 (1.28, 2.12)    | -0.55 (-0.85, -0.25) | <0.001 |

|                      |                      |                      |                       |        |                      |                      |                      |        |                         |                        |                      |        |                   |                   |                      |        |
|----------------------|----------------------|----------------------|-----------------------|--------|----------------------|----------------------|----------------------|--------|-------------------------|------------------------|----------------------|--------|-------------------|-------------------|----------------------|--------|
|                      |                      |                      |                       |        |                      |                      |                      |        | 150.79)                 |                        | -0.21)               |        | 2.66)             | 2.17)             | -0.25)               |        |
| Oceania              | 14.03 (8.30, 22.10)  | 14.03 (8.30, 22.10)  | 0.00 (0.00, 0.00)*    | <0.001 | —                    | —                    | —                    | —      | 80.72 (44.34, 152.08)   | 94.51 (47.54, 179.76)  | (0.42, 0.62)         | <0.001 | (0.77, 2.67)      | (0.83, 3.16)      | 0.52 (0.43, 0.62)    | <0.001 |
| Australasia          | 19.70 (12.11, 29.54) | 19.97 (12.46, 29.64) | 0.05 (0.02, 0.07)     | <0.001 | 0.50 (0.11, 1.07)    | 0.17 (0.00, 0.42)    | -3.74 (-5.05, -2.42) | <0.001 | 144.87 (111.18, 172.69) | 93.69 (69.10, 127.94)  | -1.60 (-2.48, -0.71) | <0.001 | 2.47 (1.87, 2.98) | 1.59 (1.15, 2.17) | -1.62 (-2.54, -0.70) | 0.001  |
| <b>35-39 years</b>   |                      |                      |                       |        |                      |                      |                      |        |                         |                        |                      |        |                   |                   |                      |        |
| <b>Women</b>         |                      |                      |                       |        |                      |                      |                      |        |                         |                        |                      |        |                   |                   |                      |        |
| Global               | 10.72 (5.75, 17.47)  | 10.46 (5.73, 16.89)  | -0.09 (-0.09, -0.08)  | <0.001 | 6.25 (3.67, 9.98)    | 3.08 (1.86, 4.90)    | -2.34 (-2.64, -2.04) | <0.001 | 55.09 (46.06, 73.78)    | 52.92 (43.45, 60.02)   | -0.03 (-0.53, 0.47)  | 0.898  | 1.04 (0.86, 1.40) | 1.00 (0.82, 1.14) | -0.01 (-0.51, 0.50)  | 0.976  |
| <b>SDI category</b>  |                      |                      |                       |        |                      |                      |                      |        |                         |                        |                      |        |                   |                   |                      |        |
| High                 | 10.98 (5.89, 18.05)  | 10.30 (5.81, 16.36)  | -0.22 (-0.25, -0.20)  | <0.001 | 34.99 (20.57, 55.95) | 23.41 (14.17, 37.12) | -1.25 (-1.91, -0.60) | <0.001 | 65.25 (58.39, 73.02)    | 47.48 (41.63, 53.20)   | -1.10 (-1.37, -0.82) | <0.001 | 1.15 (1.03, 1.28) | 0.84 (0.74, 0.93) | -1.10 (-1.40, -0.81) | <0.001 |
| High-middle          | 10.31 (5.57, 16.87)  | 10.05 (5.48, 16.31)  | -0.09 (-0.10, -0.07)  | <0.001 | 0.19 (0.07, 0.35)    | 0.12 (0.05, 0.24)    | -1.32 (-2.75, 0.13)  | 0.075  | 92.80 (80.65, 135.45)   | 137.63 (95.76, 167.50) | 1.47 (0.42, 2.53)    | 0.006  | 1.78 (1.54, 2.61) | 2.64 (1.84, 3.22) | 1.48 (0.43, 2.55)    | 0.006  |
| Middle               | 10.63 (5.78, 17.31)  | 10.27 (5.59, 16.64)  | -0.12 (-0.15, -0.10)  | <0.001 | —                    | —                    | —                    | —      | 35.46 (27.43, 52.28)    | 25.43 (20.51, 32.88)   | -1.12 (-1.30, -0.93) | <0.001 | 0.68 (0.52, 1.00) | 0.48 (0.39, 0.63) | -1.14 (-1.32, -0.96) | <0.001 |
| Low-middle           | 11.10 (6.06, 18.03)  | 10.99 (6.03, 17.80)  | -0.03 (-0.04, -0.03)  | <0.001 | —                    | —                    | —                    | —      | 29.57 (18.70, 40.03)    | 26.50 (19.03, 33.10)   | -0.38 (-0.46, -0.31) | <0.001 | 0.57 (0.36, 0.77) | 0.51 (0.36, 0.63) | -0.40 (-0.47, -0.32) | <0.001 |
| Low                  | 10.97 (5.93, 17.80)  | 10.90 (5.88, 17.68)  | -0.02 (-0.02, -0.02)  | <0.001 | —                    | —                    | —                    | —      | 52.46 (22.09, 81.59)    | 39.28 (24.28, 55.30)   | -1.00 (-1.05, -0.94) | <0.001 | 1.00 (0.42, 1.57) | 0.75 (0.46, 1.07) | -1.01 (-1.07, -0.95) | <0.001 |
| <b>21 GBD region</b> |                      |                      |                       |        |                      |                      |                      |        |                         |                        |                      |        |                   |                   |                      |        |
| South Asia           | 11.62 (6.33, 19.09)  | 11.61 (6.32, 19.07)  | -0.00 (-0.00, -0.00)* | <0.001 | —                    | —                    | —                    | —      | 10.88 (5.28, 18.27)     | 9.45 (5.88, 13.65)     | -0.58 (-0.93, -0.24) | 0.001  | 0.21 (0.10, 0.35) | 0.18 (0.11, 0.26) | -0.59 (-0.94, -0.24) | 0.001  |
| East Asia            | 10.82 (5.85, 17.80)  | 10.21 (5.84, 17.68)  | -0.21 (-0.26, -0.16)  | <0.001 | —                    | —                    | —                    | —      | 24.98 (17.03, 32.93)    | 16.07 (10.22, 21.92)   | -1.52 (-1.52, -1.52) | <0.001 | 0.47 (0.47, 0.47) | 0.30 (0.30, 0.30) | -1.57 (-1.57, -1.57) | <0.001 |

|                              |                     |                     |                       |        |                       |                       |                      |       |                         |                         |                   |        |              |              |                   |        |
|------------------------------|---------------------|---------------------|-----------------------|--------|-----------------------|-----------------------|----------------------|-------|-------------------------|-------------------------|-------------------|--------|--------------|--------------|-------------------|--------|
|                              | 17.77)              | 16.44)              | -0.16)                |        |                       |                       |                      |       | 46.46)                  | 21.70)                  | (-1.87,           | (0.32, | (0.19,       | (-1.93,      |                   |        |
|                              |                     |                     |                       |        |                       |                       |                      |       |                         |                         | -1.16)            | 0.89)  | 0.41)        | -1.22)       |                   |        |
|                              |                     |                     |                       |        |                       |                       |                      |       |                         |                         | -1.43)            | 0.71)  | 0.46)        | -1.46)       |                   |        |
| North Africa and Middle East | 8.64 (4.70, 14.07)  | 8.67 (4.71, 14.08)  | 0.01 (0.01, 0.01)     | <0.001 | —                     | —                     | —                    | —     | 37.40 (21.95, 63.97)    | 24.48 (16.79, 38.72)    | (-1.57, -1.29)    | <0.001 | (0.41, 1.23) | (0.31, 0.73) | (-1.61, -1.31)    | <0.001 |
| Western Sub-Saharan Africa   | 11.04 (5.94, 17.88) | 11.06 (5.96, 17.93) | 0.01 (0.00, 0.01)     | <0.001 | —                     | —                     | —                    | —     | 102.53 (41.34, 169.06)  | 61.47 (38.13, 87.45)    | (-1.94, -1.60)    | <0.001 | (0.79, 3.26) | (0.73, 1.67) | (-1.96, -1.62)    | <0.001 |
| Southeast Asia               | 9.22 (4.98, 15.04)  | 9.19 (4.97, 14.97)  | -0.01 (-0.01, -0.01)  | <0.001 | —                     | —                     | —                    | —     | 41.81 (25.41, 66.82)    | 35.30 (25.29, 50.17)    | (-0.66, -0.48)    | <0.001 | (0.48, 1.28) | (0.48, 0.96) | (-0.67, -0.49)    | <0.001 |
| Eastern Sub-Saharan Africa   | 10.97 (5.88, 17.83) | 10.98 (5.88, 17.83) | 0.00 (-0.00, 0.00)    | 0.141  | —                     | —                     | —                    | —     | 49.81 (21.55, 94.81)    | 36.86 (22.07, 52.52)    | (-1.14, -0.93)    | <0.001 | (0.41, 1.81) | (0.41, 1.00) | (-1.16, -0.95)    | <0.001 |
| Central Latin America        | 10.25 (5.51, 16.71) | 10.24 (5.51, 16.70) | -0.00 (-0.00, 0.00)   | 0.056  | —                     | —                     | —                    | —     | 24.96 (21.18, 29.60)    | 19.49 (14.71, 25.30)    | (-1.02, -0.52)    | <0.001 | (0.40, 0.57) | (0.28, 0.48) | (-1.05, -0.53)    | <0.001 |
| Tropical Latin America       | 10.84 (5.93, 17.74) | 10.84 (5.93, 17.73) | -0.00 (-0.00, -0.00)* | <0.001 | —                     | —                     | —                    | —     | 134.27 (101.56, 149.54) | 79.03 (67.24, 91.63)    | (-2.07, -1.57)    | <0.001 | (1.96, 2.88) | (1.29, 1.76) | (-2.09, -1.59)    | <0.001 |
| Central Sub-Saharan Africa   | 10.47 (5.60, 17.00) | 10.47 (5.60, 17.00) | 0.00 (0.00, 0.00)*    | <0.001 | —                     | —                     | —                    | —     | 108.42 (35.90, 212.31)  | 92.02 (40.94, 164.37)   | (-0.77, -0.43)    | <0.001 | (0.68, 4.10) | (0.78, 3.17) | (-0.77, -0.43)    | <0.001 |
| Western Europe               | 9.85 (5.33, 16.08)  | 9.67 (5.30, 15.76)  | -0.07 (-0.08, -0.06)  | <0.001 | 0.51 (0.09, 1.12)     | —                     | —                    | —     | 40.57 (31.78, 46.58)    | 19.87 (17.49, 23.72)    | (-2.58, -2.25)    | <0.001 | (0.58, 0.87) | (0.32, 0.44) | (-2.63, -2.28)    | <0.001 |
| High-income North America    | 11.96 (6.38, 19.81) | 11.15 (6.73, 17.24) | -0.24 (-0.31, -0.17)  | <0.001 | 93.18 (54.77, 148.43) | 67.94 (41.09, 107.95) | -0.99 (-1.64, -0.33) | 0.003 | 99.34 (87.10, 113.24)   | 89.10 (72.73, 101.24)   | (-0.74, -0.03)    | 0.035  | (1.48, 1.90) | (1.24, 1.72) | (-0.68, -0.02)    | 0.038  |
| Central Asia                 | 11.00 (6.06, 17.72) | 11.00 (6.06, 17.72) | 0.00 (0.00, 0.00)*    | <0.001 | —                     | —                     | —                    | —     | 101.45 (78.46, 172.41)  | 210.25 (139.01, 265.53) | 2.58 (2.10, 3.07) | <0.001 | (1.50, 3.32) | (2.67, 5.13) | 2.60 (2.12, 3.08) | <0.001 |
| Eastern Europe               | 11.79 (6.29, 17.72) | 11.81 (6.30, 17.72) | 0.00 (0.00, 0.00)     | 0.002  | —                     | —                     | —                    | —     | 288.16                  | 698.80                  | 3.36              | <0.001 | 5.55         | 13.48        | 3.37 (2.09, 4.65) | <0.001 |

|                     |              |              |               |        |               |               |         |        |               |                |         |        |        |              |         |        |
|---------------------|--------------|--------------|---------------|--------|---------------|---------------|---------|--------|---------------|----------------|---------|--------|--------|--------------|---------|--------|
|                     | 19.08)       | 19.10)       | 0.01)         |        |               |               |         |        | (239.45,      | (464.82,       | (2.08,  | (4.60, | (8.96, | 4.67)        |         |        |
|                     |              |              |               |        |               |               |         |        | 458.75)       | 886.88)        | 4.65)   | 8.85)  | 17.14) |              |         |        |
| Southern            | 11.42 (6.28, | 11.41 (6.27, | -0.00 (-0.01, | 0.018  | —             | —             | —       | —      | 106.98        | 60.78 (36.74,  | -1.84   | 2.06   | 1.16   | -1.85        |         |        |
| Sub-Saharan Africa  | 18.55)       | 18.53)       | -0.00)        |        |               |               |         |        | (65.84,       | 95.64)         | (-2.71, | <0.001 | (1.26, | (0.70,       | (-2.72, | <0.001 |
|                     |              |              |               |        |               |               |         |        | 143.94)       |                | -0.96)  |        | 2.76)  | 1.83)        | -0.97)  |        |
| High-income Asia    | 11.72 (6.35, | 10.50 (5.79, | -0.37 (-0.39, | <0.001 | 3.29 (1.33,   | —             | —       | —      | 37.71 (32.77, | 20.00 (16.74,  | -2.21   | 0.67   | 0.35   | -2.40        |         |        |
| Pacific             | 19.29)       | 17.03)       | -0.35)        |        | 6.05)         |               |         |        | 50.46)        | 27.13)         | (-2.61, | <0.001 | (0.59, | (0.29,       | (-2.60, | <0.001 |
|                     |              |              |               |        |               |               |         |        |               |                | -1.81)  |        | 0.92)  | 0.48)        | -2.19)  |        |
| Central Europe      | 9.67 (5.15,  | 9.70 (5.16,  | 0.00 (-0.04,  | 0.985  | —             | —             | —       | —      | 76.30 (64.70, | 43.56 (34.93,  | -1.90   | 1.46   | 0.83   | -1.92        |         |        |
|                     | 15.87)       | 15.89)       | 0.04)         |        |               |               |         |        | 88.72)        | 53.65)         | (-2.15, | <0.001 | (1.24, | (0.66,       | (-2.17, | <0.001 |
|                     |              |              |               |        |               |               |         |        |               |                | -1.66)  |        | 1.70)  | 1.02)        | -1.67)  |        |
| Andean Latin        | 9.53 (5.12,  | 9.55 (5.15,  | 0.01 (0.00,   | <0.001 | —             | —             | —       | —      | 25.84 (15.52, | 17.68 (10.94,  | -1.35   | 0.50   | 0.34   | -1.39        |         |        |
| America             | 15.56)       | 15.58)       | 0.01)         |        |               |               |         |        | 40.03)        | 26.67)         | (-1.88, | <0.001 | (0.30, | (0.21,       | (-1.93, | <0.001 |
|                     |              |              |               |        |               |               |         |        |               |                | -0.82)  |        | 0.77)  | 0.51)        | -0.85)  |        |
| Caribbean           | 9.61 (5.13,  | 9.61 (5.13,  | 0.00 (0.00,   | <0.001 | —             | —             | —       | —      | 70.14 (47.20, | 77.44 (45.91,  | 0.35    | 1.34   | 1.49   | 0.36 (0.11,  | 0.004   |        |
|                     | 15.84)       | 15.84)       | 0.00)*        |        |               |               |         |        | 109.08)       | 134.74)        | (0.11,  | 0.005  | (0.90, | (0.87,       | 0.61)   |        |
|                     |              |              |               |        |               |               |         |        |               |                | 0.60)   |        | 2.10)  | 2.59)        |         |        |
| Southern Latin      | 8.41 (4.52,  | 8.41 (4.52,  | 0.00 (0.00,   | 0.283  | —             | —             | —       | —      | 66.27 (47.99, | 45.79 (35.14,  | -1.31   | 1.28   | 0.87   | -1.36        |         |        |
| America             | 14.44)       | 14.44)       | 0.00)         |        |               |               |         |        | 92.93)        | 60.14)         | (-1.73, | <0.001 | (0.92, | (0.66,       | (-1.78, | <0.001 |
|                     |              |              |               |        |               |               |         |        |               |                | -0.89)  |        | 1.80)  | 1.14)        | -0.93)  |        |
| Oceania             | 9.38 (4.98,  | 9.38 (4.98,  | 0.00 (0.00,   | 0.104  | —             | —             | —       | —      | 94.13 (42.15, | 96.57 (40.01,  | 0.08    | 1.81   | 1.86   | 0.05 (-0.07, | 0.442   |        |
|                     | 15.23)       | 15.23)       | 0.00)         |        |               |               |         |        | 174.35)       | 193.97)        | (-0.10, | 0.394  | (0.81, | (0.77,       | 0.17)   |        |
|                     |              |              |               |        |               |               |         |        |               |                | 0.26)   |        | 3.37)  | 3.75)        |         |        |
| Australasia         | 9.64 (5.16,  | 9.51 (5.23,  | -0.05 (-0.06, | <0.001 | —             | —             | —       | —      | 69.48 (55.61, | 37.69 (28.76,  | -2.07   | 1.28   | 0.68   | -2.15        |         |        |
|                     | 15.93)       | 15.68)       | -0.03)        |        |               |               |         |        | 84.12)        | 49.78)         | (-2.42, | <0.001 | (1.01, | (0.51,       | (-2.70, | <0.001 |
|                     |              |              |               |        |               |               |         |        |               |                | -1.72)  |        | 1.55)  | 0.91)        | -1.60)  |        |
| <b>Men</b>          |              |              |               |        |               |               |         |        |               |                |         |        |        |              |         |        |
| Global              | 16.77 (9.48, | 15.49 (8.78, | -0.28 (-0.29, | <0.001 | 11.41 (6.74,  | 6.89 (4.24,   | -1.71   |        | 141.46        | 155.82         | 0.34    | 2.69   | 2.98   | 0.35 (-0.29, | 0.281   |        |
|                     | 26.68)       | 24.55)       | -0.27)        |        | 18.27)        | 10.67)        | (-2.14, | <0.001 | (125.77,      | (116.11,       | (-0.30, | 0.304  | (2.38, | (2.21,       | 1.00)   |        |
|                     |              |              |               |        |               |               | -1.28)  |        | 186.76)       | 178.31)        | 0.98)   |        | 3.58)  | 3.41)        |         |        |
| <b>SDI category</b> |              |              |               |        |               |               |         |        |               |                |         |        |        |              |         |        |
| High                | 20.65        | 18.37        | -0.40 (-0.44, | <0.001 | 59.17 (35.03, | 45.53 (27.59, | -0.88   |        | 176.97        | 114.65 (94.90, | -1.50   | 3.26   | 2.09   | -1.55        | <0.001  |        |
|                     | (11.84,      | (11.05,      | -0.36)        |        | 95.57)        | 71.92)        | (-1.31, | <0.001 | (136.71,      | 130.63)        | (-1.66, | <0.001 | (2.50, | (1.71,       | (-1.72, | <0.001 |



|                              |              |              |               |        |             |             |             |       |        |               |                |          |          |        |         |              |        |
|------------------------------|--------------|--------------|---------------|--------|-------------|-------------|-------------|-------|--------|---------------|----------------|----------|----------|--------|---------|--------------|--------|
|                              | 32.94)       | 28.41)       |               |        |             |             |             |       | -0.45) | 197.02)       |                |          | -1.34)   | 3.68)  | 2.40)   | -1.38)       |        |
| High-middle                  | 17.05 (9.69, | 15.84 (9.03, | -0.25 (-0.29, | <0.001 | 3.93 (1.91, | 2.87 (1.38, |             |       | -1.10) | 309.93        | 484.67         |          | 1.58)    | 5.96   | 9.34    | 1.58 (0.68,  | 0.001  |
|                              |              | 26.99)       | -0.20)        |        | 6.82)       | 4.84)       |             |       |        |               | (-1.48,        | (261.66, | (328.56, | (0.68, | (5.04,  | (6.32,       |        |
| Middle                       | 15.70 (8.78, | 14.57 (8.18, | -0.26 (-0.31, | <0.001 | 0.08 (0.02, | 0.10 (0.02, | 0.81 (0.11, | 0.023 |        | 62.11 (51.90, | 60.36 (48.44,  |          | -0.09)   | 1.19   | 1.15    | -0.10)       | 0.234  |
|                              |              | 25.15)       | -0.22)        |        | 0.18)       | 0.24)       | 1.51)       |       |        |               |                | 90.93)   | 83.96)   |        | 0.07)   | 1.74)        |        |
| Low-middle                   | 15.28 (8.46, | 15.03 (8.32, | -0.06 (-0.06, | <0.001 | —           | 0.02 (0.00, | —           | —     |        | 45.09 (34.74, | 50.19 (37.99,  |          | 0.39)    | 0.86   | 0.96    | 0.39 (0.26,  | <0.001 |
|                              |              | 24.60)       | -0.06)        |        | 0.07)       |             |             |       |        |               |                | 63.63)   | 62.28)   |        | (0.27,  | (0.66,       |        |
| Low                          | 14.99 (8.17, | 14.84 (8.10, | -0.03 (-0.04, | <0.001 | —           | —           | —           | —     |        | 80.14 (48.11, | 76.83 (50.68,  |          | -0.15)   | 1.54   | 1.47    | -0.16)       | 0.002  |
|                              |              | 24.33)       | -0.03)        |        |             |             |             |       |        |               |                | 109.13)  | 105.19)  |        | (-0.25, | (0.92,       |        |
| <b>21 GBD region</b>         |              |              |               |        |             |             |             |       |        |               |                |          |          |        |         |              |        |
| South Asia                   | 15.82 (8.64, | 15.83 (8.66, | 0.0028        | <0.001 | —           | —           | —           | —     |        | 15.27 (9.76,  | 15.97 (10.93,  |          | 0.16)    | 0.29   | 0.30    | 0.16 (-0.66, | 0.701  |
|                              |              | 25.40)       | (0.0025,      |        | 0.0031)     |             |             |       |        |               |                | 22.86)   | 23.48)   |        | (-0.65, | (0.18,       |        |
| East Asia                    | 16.58 (9.35, | 14.57 (8.26, | -0.46 (-0.52, | <0.001 | —           | —           | —           | —     |        | 43.88 (32.90, | 47.01 (28.45,  |          | 0.28)    | 0.83   | 0.89    | 0.26 (-0.05, | 0.103  |
|                              |              | 26.43)       | -0.40)        |        |             |             |             |       |        |               |                | 71.31)   | 61.89)   |        | (-0.04, | (0.62,       |        |
| North Africa and Middle East | 11.39 (6.22, | 11.42 (6.23, | 0.01 (0.00,   | 0.001  | 0.14 (0.04, | 0.29 (0.05, | 2.32 (0.62, | 0.007 |        | 56.79 (36.00, | 42.82 (30.82,  |          | -0.98)   | 1.07   | 0.80    | -1.01)       | <0.001 |
|                              |              | 18.31)       | 0.01)         |        | 0.29)       | 0.64)       | 4.05)       |       |        |               |                | 104.11)  | 70.60)   |        | (-1.08, | (0.67,       |        |
| Western Sub-Saharan Africa   | 15.13 (8.17, | 15.02 (8.11, | -0.02 (-0.02, | <0.001 | —           | —           | —           | —     |        | 68.61 (38.22, | 55.08 (36.17,  |          | -0.75)   | 1.32   | 1.05    | -0.76)       | <0.001 |
|                              |              | 24.54)       | -0.02)        |        |             |             |             |       |        |               |                | 103.54)  | 75.83)   |        | (-0.88, | (0.73,       |        |
| Southeast Asia               | 14.12 (7.81, | 14.04 (7.74, | -0.02 (-0.02, | <0.001 | —           | 0.30 (0.00, | —           | —     |        | 85.59 (63.33, | 88.41 (62.66,  |          | 0.16)    | 1.63   | 1.68    | 0.16 (-0.04, | 0.124  |
|                              |              | 22.58)       | -0.02)        |        | 0.76)       |             |             |       |        |               |                | 141.22)  | 138.84)  |        | (-0.04, | (1.21,       |        |
| Eastern Sub-Saharan Africa   | 14.90 (8.05, | 14.92 (8.06, | 0.00 (0.00,   | <0.001 | —           | —           | —           | —     |        | 145.82        | 133.51 (72.35, |          | -0.35)   | 2.80   | 2.56    | -0.35)       | <0.001 |
|                              |              | 24.27)       | 0.01)         |        |             |             |             |       |        |               |                | (90.71,  | 197.74)  |        | (-0.46, | (1.74,       |        |
| Central Latin                | 14.27 (7.89, | 14.27 (7.89, | 0.00 (-0.00,  | 0.943  | —           | —           | —           | —     |        | 47.97 (40.06, | 45.19 (31.74,  |          | -0.15)   | 0.92   | 0.87    | -0.16)       | 0.211  |

|                             |              |              |               |        |                |                |             |        |               |                |         |        |         |              |             |        |
|-----------------------------|--------------|--------------|---------------|--------|----------------|----------------|-------------|--------|---------------|----------------|---------|--------|---------|--------------|-------------|--------|
| America                     | 23.23)       | 23.23)       | 0.00)         |        |                |                |             |        | 60.72)        | 57.61)         | (-0.41, | (0.77, | (0.61,  | (-0.42,      |             |        |
|                             |              |              |               |        |                |                |             |        |               |                | 0.10)   | 1.17)  | 1.11)   | 0.09)        |             |        |
| Tropical Latin America      | 15.08 (8.52, | 15.07 (8.52, | -0.00 (-0.00, | <0.001 | —              | —              | —           | —      | 309.25)       | 222.58)        | -1.10)  | 5.98)  | 4.29)   | -1.11)       |             |        |
|                             | 24.91)       | 24.89)       | -0.00)*       |        |                |                |             |        | (225.42,      | (151.11,       | (-1.42, | <0.001 | (4.36,  | (2.92,       | (-1.43,     | <0.001 |
|                             |              |              |               |        |                |                |             |        | 352.64)       | 260.29)        | -0.77)  |        | 6.81)   | 5.02)        | -0.78)      |        |
| Central Sub-Saharan Africa  | 14.21 (7.67, | 14.21 (7.67, | 0.00 (0.00,   | <0.001 | —              | —              | —           | —      | 164.23)       | 166.55 (85.73, | 0.01)   | 3.16)  | 3.21)   | 0.01 (-0.09, | 0.812       |        |
|                             | 23.18)       | 23.18)       | 0.00)*        |        |                |                |             |        | (68.08,       | 284.61)        | (-0.09, | 0.828  | (1.31,  | (1.65,       | 0.12)       |        |
|                             |              |              |               |        |                |                |             |        | 302.49)       |                | 0.12)   |        | 5.84)   | 5.49)        |             |        |
| Western Europe              | 20.30)       | 19.98)       | -0.06 (-0.09, | <0.001 | 0.76 (0.23,    | 0.46 (0.11,    | -1.26)      | 0.127  | 120.85)       | 71.67 (54.55,  | -1.81)  | 2.28)  | 1.34)   | -1.83)       |             |        |
|                             | (11.68,      | (11.44,      | -0.03)        |        | 1.47)          | 0.95)          | (-2.85,     |        | (94.12,       | 86.39)         | (-2.02, | <0.001 | (1.76,  | (1.01,       | (-2.04,     | <0.001 |
|                             | 32.58)       | 32.22)       |               |        |                |                | 0.36)       |        | 146.41)       |                | -1.61)  |        | 2.75)   | 1.61)        | -1.62)      |        |
| High-income North America   | 21.90)       | 19.69)       | -0.36 (-0.42, | <0.001 | 141.85 (84.12, | 126.36 (75.55, | -0.40)      | 0.106  | 257.60)       | 180.52)        | -1.26)  | 4.69)  | 3.23)   | -1.30)       |             |        |
|                             | (12.27,      | (12.64,      | -0.31)        |        | 228.07)        | 199.88)        | (-0.88,     |        | (189.64,      | (136.89,       | (-1.48, | <0.001 | (3.44,  | (2.45,       | (-1.73,     | <0.001 |
|                             | 35.23)       | 28.83)       |               |        |                |                | 0.08)       |        | 284.98)       | 213.53)        | -1.05)  |        | 5.18)   | 3.84)        | -0.88)      |        |
| Central Asia                | 15.88 (8.70, | 15.88 (8.74, | -0.000567     | <0.001 | 8.46 (2.38,    | 7.40 (1.98,    | -0.51)      | <0.001 | 274.33)       | 654.29)        | 2.99)   | 5.27)  | 12.63)  | 3.00 (2.51,  | <0.001      |        |
|                             | 24.71)       | 24.66)       | (-0.000573,   |        | 17.51)         | 15.20)         | (-0.78,     |        | (201.45,      | (380.38,       | (2.49,  | <0.001 | (3.84,  | (7.33,       | 3.49)       | <0.001 |
|                             |              |              | -0.000562)    |        |                |                | -0.25)      |        | 482.73)       | 826.66)        | 3.48)   |        | 9.32)   | 15.97)       |             |        |
| Eastern Europe              | 18.76)       | 18.77)       | 0.00 (0.00,   | 0.007  | 16.48 (7.54,   | 14.74 (6.45,   | -0.38)      | 0.029  | 1133.24)      | 2686.34)       | 3.15)   | 21.86) | 51.89)  | 3.16 (2.18,  | <0.001      |        |
|                             | (10.63,      | (10.63,      | 0.00)*        |        | 28.92)         | 25.57)         | (-0.73,     |        | (906.43,      | (1836.16,      | (2.18,  | <0.001 | (17.48, | (35.48,      | 4.14)       | <0.001 |
|                             | 30.26)       | 30.28)       |               |        |                |                | -0.04)      |        | 1770.57)      | 3233.14)       | 4.13)   |        | 34.22)  | 62.49)       |             |        |
| Southern Sub-Saharan Africa | 15.56 (8.47, | 15.56 (8.46, | -0.00 (-0.00, | 0.057  | —              | —              | —           | —      | 179.46)       | 128.27 (85.80, | -1.10)  | 3.45)  | 2.46)   | -1.11)       | <0.001      |        |
|                             | 25.02)       | 25.01)       | 0.00)         |        |                |                |             |        | (119.48,      | 190.55)        | (-1.64, | <0.001 | (2.29,  | (1.65,       | (-1.65,     | <0.001 |
|                             |              |              |               |        |                |                |             |        | 247.60)       |                | -0.56)  |        | 4.75)   | 3.67)        | -0.57)      |        |
| High-income Asia Pacific    | 22.12)       | 20.10)       | -0.33 (-0.40, | <0.001 | 41.89 (22.77,  | 27.87 (15.24,  | -1.46)      | <0.001 | 115.78)       | 65.82 (54.40,  | -1.92)  | 2.11)  | 1.16)   | -2.03)       |             |        |
|                             | (12.61,      | (11.68,      | -0.26)        |        | 69.44)         | 45.33)         | (-1.75,     |        | (102.81,      | 100.16)        | (-2.14, | <0.001 | (1.87,  | (0.94,       | (-2.29,     | <0.001 |
|                             | 34.70)       | 30.99)       |               |        |                |                | -1.17)      |        | 154.98)       |                | -1.70)  |        | 2.86)   | 1.81)        | -1.76)      |        |
| Central Europe              | 20.92)       | 21.22)       | 0.04 (0.01,   | 0.019  | 1.03 (0.37,    | 1.98 (0.78,    | 2.42 (0.70, | 0.006  | 282.89)       | 244.90)        | -0.49)  | 5.42)  | 4.68)   | -0.50)       |             |        |
|                             | (12.19,      | (12.47,      | 0.07)         |        | 2.10)          | 3.59)          | 4.17)       |        | (221.57,      | (163.43,       | (-0.66, | <0.001 | (4.26,  | (3.11,       | (-0.67,     | <0.001 |
|                             | 32.83)       | 33.12)       |               |        |                |                |             |        | 340.38)       | 299.40)        | -0.32)  |        | 6.55)   | 5.72)        | -0.33)      |        |
| Andean Latin America        | 13.31 (7.22, | 13.34 (7.24, | 0.01 (0.00,   | <0.001 | —              | —              | —           | —      | 39.05 (25.40, | 33.91 (21.47,  | -0.46)  | 0.75)  | 0.65)   | -0.48)       | <0.001      |        |
|                             | 21.99)       | 21.77)       | 0.01)         |        |                |                |             |        | 59.83)        | 52.39)         | (-0.67, | <0.001 | (0.49,  | (0.41,       | (-0.69,     | <0.001 |
|                             |              |              |               |        |                |                |             |        |               |                | -0.25)  |        | 1.16)   | 1.01)        | -0.27)      |        |
| Caribbean                   | 13.42 (7.32, | 13.42 (7.32, | 0.00 (0.00,   | 0.027  | —              | —              | —           | —      | 149.15)       | 174.57)        | 0.56)   | <0.001 | 2.86)   | 3.35)        | 0.56 (0.26, | <0.001 |

|                                                          |              |              |               |        |             |             |             |        |             |                |         |        |        |              |         |        |
|----------------------------------------------------------|--------------|--------------|---------------|--------|-------------|-------------|-------------|--------|-------------|----------------|---------|--------|--------|--------------|---------|--------|
|                                                          | 21.87)       | 21.87)       | 0.00)*        |        |             |             |             |        | (112.76,    | (125.16,       | (0.26,  | (2.16, | (2.40, | 0.86)        |         |        |
|                                                          |              |              |               |        |             |             |             |        | 219.01)     | 249.75)        | 0.85)   | 4.22)  | 4.80)  |              |         |        |
| Southern Latin America                                   | 16.79 (9.31, | 16.79 (9.31, | 0.00 (-0.00,  | 0.646  | —           | —           | —           | —      | 168.35      | 130.74         | -0.78   | 3.25   | 2.51   | -0.80        |         |        |
|                                                          | 26.40)       | 26.40)       | 0.00)         |        |             |             |             |        | (124.78,    | (100.02,       | (-0.96, | <0.001 | (2.41, | (1.92,       | (-0.99, | <0.001 |
|                                                          |              |              |               |        |             |             |             |        | 226.50)     | 172.13)        | -0.58)  |        | 4.38)  | 3.31)        | -0.61)  |        |
| Oceania                                                  | 14.32 (7.98, | 14.32 (7.98, | 0.00 (0.00,   | <0.001 | —           | —           | —           | —      | 102.71      | 114.31 (60.88, | 0.36    | 1.97   | 2.20   | 0.37 (0.31,  | <0.001  |        |
|                                                          | 23.35)       | 23.35)       | 0.00)*        |        |             |             |             |        | (57.21,     | 209.68)        | (0.26,  | <0.001 | (1.09, | (1.17,       | 0.42)   |        |
|                                                          |              |              |               |        |             |             |             |        | 182.46)     |                | 0.45)   |        | 3.51)  | 4.05)        |         |        |
| Australasia                                              | 21.49        | 21.67        | 0.03 (0.01,   | <0.001 | 0.97 (0.28, | 0.81 (0.32, | -0.74       |        | 167.76      | 127.58 (95.30, | -0.97   | 3.13   | 2.38   | -0.97        |         |        |
|                                                          | (12.05,      | (12.47,      | 0.05)         |        | 1.94)       | 1.59)       | (-1.87,     | 0.202  | (135.51,    | 173.93)        | (-1.22, | <0.001 | (2.51, | (1.77,       | (-1.23, | <0.001 |
|                                                          | 34.23)       | 34.04)       |               |        |             |             | 0.40)       |        | 209.03)     |                | -0.73)  |        | 3.95)  | 3.28)        | -0.72)  |        |
| <b>Atrial fibrillation and flutter 30-34 years Women</b> |              |              |               |        |             |             |             |        |             |                |         |        |        |              |         |        |
| Global                                                   | 2.45 (1.10,  | 2.53 (1.16,  | 0.11 (0.06,   | <0.001 | 4.16 (1.87, | 4.29 (1.97, | 0.11 (0.06, | <0.001 | 1.12 (0.87, | 1.22 (0.95,    | 0.27    | 0.01   | 0.01   | 0.37 (0.28,  | <0.001  |        |
|                                                          | 4.40)        | 4.58)        | 0.15)         |        | 7.48)       | 7.79)       | 0.15)       |        | 1.49)       | 1.59)          | (0.22,  | <0.001 | (0.01, | (0.01,       | 0.46)   |        |
|                                                          |              |              |               |        |             |             |             |        |             |                | 0.33)   |        | 0.01)  | 0.02)        |         |        |
| <b>SDI category</b>                                      |              |              |               |        |             |             |             |        |             |                |         |        |        |              |         |        |
| High                                                     | 2.29 (1.04,  | 2.58 (1.30,  | 0.41 (0.35,   | <0.001 | 3.90 (1.77, | 4.39 (2.21, | 0.41 (0.35, | <0.001 | 1.06 (0.82, | 1.08 (0.82,    | 0.06    | 0.01   | 0.01   | -0.12        |         |        |
|                                                          | 4.15)        | 4.44)        | 0.47)         |        | 7.05)       | 7.55)       | 0.47)       |        | 1.39)       | 1.44)          | (-0.02, | 0.124  | (0.01, | (0.01,       | (-0.34, | 0.278  |
|                                                          |              |              |               |        |             |             |             |        |             |                | 0.13)   |        | 0.01)  | 0.01)        | 0.10)   |        |
| High-middle                                              | 2.47 (1.10,  | 2.66 (1.22,  | 0.26 (0.22,   | <0.001 | 4.20 (1.87, | 4.52 (2.07, | 0.26 (0.22, | <0.001 | 1.09 (0.85, | 1.09 (0.82,    | -0.04   | 0.01   | 0.01   | -0.18        |         |        |
|                                                          | 4.43)        | 4.83)        | 0.29)         |        | 7.53)       | 8.20)       | 0.29)       |        | 1.44)       | 1.44)          | (-0.16, | 0.532  | (0.01, | (0.01,       | (-0.56, | 0.366  |
|                                                          |              |              |               |        |             |             |             |        |             |                | 0.08)   |        | 0.01)  | 0.01)        | 0.21)   |        |
| Middle                                                   | 2.62 (1.18,  | 2.68 (1.23,  | 0.08 (0.04,   | <0.001 | 4.45 (2.01, | 4.55 (2.09, | 0.08 (0.04, | <0.001 | 1.30 (1.00, | 1.41 (1.05,    | 0.29    | 0.02   | 0.02   | 0.30 (-0.19, | 0.231   |        |
|                                                          | 4.69)        | 4.79)        | 0.13)         |        | 7.97)       | 8.14)       | 0.13)       |        | 1.69)       | 1.83)          | (-0.02, | 0.072  | (0.01, | (0.01,       | 0.79)   |        |
|                                                          |              |              |               |        |             |             |             |        |             |                | 0.60)   |        | 0.02)  | 0.02)        |         |        |
| Low-middle                                               | 2.51 (1.15,  | 2.51 (1.14,  | -0.00 (-0.04, | 0.804  | 4.27 (1.95, | 4.27 (1.94, | -0.00       |        | 0.92 (0.67, | 1.12 (0.84,    | 0.67    | 0.01   | 0.01   | 1.14 (0.87,  | <0.001  |        |
|                                                          | 4.55)        | 4.54)        | 0.03)         |        | 7.73)       | 7.72)       | (-0.04,     | 0.808  | 1.28)       | 1.50)          | (0.55,  | <0.001 | (0.01, | (0.01,       | 1.40)   |        |
|                                                          |              |              |               |        |             |             | 0.03)       |        |             |                | 0.79)   |        | 0.01)  | 0.02)        |         |        |
| Low                                                      | 1.89 (0.82,  | 1.87 (0.80,  | -0.04 (-0.05, | <0.001 | 3.22 (1.40, | 3.18 (1.35, | -0.04       | <0.001 | 1.13 (0.74, | 1.24 (0.88,    | 0.33    | 0.01   | 0.02   | 0.46 (0.24,  | <0.001  |        |
|                                                          | 3.42)        | 3.40)        | -0.03)        |        | 5.82)       | 5.77)       | (-0.05,     |        | 1.59)       | 1.63)          | (0.18,  | <0.001 | (0.01, | (0.01,       | 0.68)   |        |

| <b>21 GBD region</b>         |                   |                   |                      |        |                   |                    |                      |        |                   |                   |                      |        |                   |                   |                      |        |
|------------------------------|-------------------|-------------------|----------------------|--------|-------------------|--------------------|----------------------|--------|-------------------|-------------------|----------------------|--------|-------------------|-------------------|----------------------|--------|
| South Asia                   | 2.79 (1.29, 5.00) | 2.88 (1.34, 5.10) | 0.10 (0.02, 0.17)    | 0.008  | 4.75 (2.19, 8.50) | 4.89 (2.27, 8.67)  | 0.10 (0.02, 0.17)    | 0.008  | 0.86 (0.59, 1.27) | 1.05 (0.74, 1.46) | 0.73 (0.52, 0.93)    | <0.001 | 0.01 (0.01, 0.01) | 0.01 (0.01, 0.01) | 1.31 (0.93, 1.70)    | <0.001 |
| East Asia                    | 3.15 (1.48, 5.57) | 3.35 (1.55, 5.94) | 0.20 (0.14, 0.25)    | <0.001 | 5.35 (2.51, 9.47) | 5.69 (2.63, 10.09) | 0.20 (0.14, 0.25)    | <0.001 | 1.05 (0.73, 1.49) | 1.06 (0.72, 1.54) | -0.03 (-0.37, 0.30)  | 0.844  | 0.01 (0.01, 0.01) | 0.01 (0.01, 0.01) | -0.25 (-0.77, 0.27)  | 0.346  |
| North Africa and Middle East | 1.75 (0.73, 3.19) | 1.77 (0.73, 3.26) | 0.02 (-0.00, 0.04)   | 0.063  | 2.98 (1.25, 5.43) | 3.00 (1.25, 5.55)  | 0.02 (-0.00, 0.04)   | 0.060  | 1.28 (0.89, 1.83) | 1.55 (0.99, 2.30) | 0.66 (0.51, 0.82)    | <0.001 | 0.02 (0.01, 0.03) | 0.02 (0.01, 0.04) | 0.82 (0.62, 1.03)    | <0.001 |
| Western Sub-Saharan Africa   | 1.80 (0.75, 3.32) | 1.83 (0.76, 3.39) | 0.05 (0.04, 0.06)    | <0.001 | 3.06 (1.28, 5.65) | 3.11 (1.30, 5.76)  | 0.05 (0.04, 0.06)    | <0.001 | 0.66 (0.44, 0.94) | 0.73 (0.52, 1.04) | 0.37 (0.28, 0.45)    | <0.001 | 0.01 (0.00, 0.01) | 0.01 (0.01, 0.01) | 0.60 (0.49, 0.71)    | <0.001 |
| Southeast Asia               | 3.04 (1.41, 5.46) | 3.14 (1.45, 5.59) | 0.10 (0.07, 0.13)    | <0.001 | 5.17 (2.40, 9.29) | 5.34 (2.47, 9.50)  | 0.10 (0.07, 0.13)    | <0.001 | 1.14 (0.79, 1.60) | 1.66 (1.13, 2.20) | 1.31 (1.19, 1.44)    | <0.001 | 0.01 (0.01, 0.02) | 0.02 (0.01, 0.03) | 1.96 (1.79, 2.13)    | <0.001 |
| Eastern Sub-Saharan Africa   | 1.10 (0.40, 2.08) | 1.10 (0.41, 2.08) | 0.03 (0.01, 0.04)    | 0.001  | 1.86 (0.69, 3.53) | 1.88 (0.70, 3.53)  | 0.03 (0.01, 0.04)    | 0.001  | 1.69 (0.70, 2.62) | 1.73 (0.95, 2.52) | 0.07 (-0.06, 0.21)   | 0.292  | 0.03 (0.01, 0.04) | 0.03 (0.01, 0.04) | 0.08 (-0.07, 0.23)   | 0.303  |
| Central Latin America        | 1.14 (0.42, 2.15) | 1.12 (0.40, 2.13) | -0.07 (-0.12, -0.01) | 0.017  | 1.93 (0.71, 3.66) | 1.90 (0.69, 3.62)  | -0.07 (-0.12, -0.01) | 0.017  | 1.20 (0.67, 1.47) | 1.07 (0.66, 1.41) | -0.35 (-0.45, -0.26) | <0.001 | 0.02 (0.01, 0.02) | 0.02 (0.01, 0.02) | -0.40 (-0.52, -0.29) | <0.001 |
| Tropical Latin America       | 1.54 (0.62, 2.83) | 1.55 (0.63, 2.85) | 0.11 (0.01, 0.21)    | 0.023  | 2.62 (1.05, 4.81) | 2.64 (1.07, 4.85)  | 0.11 (0.01, 0.21)    | 0.023  | 1.55 (1.27, 2.03) | 1.54 (1.18, 1.84) | -0.02 (-0.35, 0.31)  | 0.882  | 0.02 (0.02, 0.03) | 0.02 (0.02, 0.03) | 0.06 (-0.14, 0.26)   | 0.569  |
| Central Sub-Saharan Africa   | 1.67 (0.69, 2.97) | 1.64 (0.68, 2.95) | -0.06 (-0.07, -0.06) | <0.001 | 2.85 (1.18, 5.05) | 2.79 (1.16, 5.01)  | -0.06 (-0.07, -0.06) | <0.001 | 1.34 (0.58, 2.60) | 1.45 (0.71, 2.52) | 0.24 (-0.00, 0.49)   | 0.055  | 0.02 (0.01, 0.04) | 0.02 (0.01, 0.04) | 0.32 (0.02, 0.61)    | 0.034  |
| Western Europe               | 1.55 (0.62, 2.84) | 1.39 (0.55, 2.57) | -0.38 (-0.40, -0.35) | <0.001 | 2.63 (1.06, 4.83) | 2.36 (0.93, 4.36)  | -0.38 (-0.40, -0.35) | <0.001 | 1.14 (0.76, 1.45) | 1.06 (0.75, 1.34) | -0.25 (-0.32, -0.17) | <0.001 | 0.02 (0.01, 0.02) | 0.01 (0.01, 0.02) | -0.24 (-0.32, -0.16) | <0.001 |
| High-income North            | 3.33 (1.63, 5.03) | 4.25 (2.24, 6.26) | 0.86 (0.81, 0.91)    | <0.001 | 5.65 (2.76, 8.54) | 7.23 (3.80, 10.66) | 0.86 (0.81, 0.91)    | <0.001 | 1.09 (0.79, 1.39) | 1.18 (0.83, 1.53) | 0.32 (0.27, 0.37)    | <0.001 | 0.01 (0.01, 0.01) | 0.01 (0.01, 0.01) | -0.27 (-0.32, -0.22) | 0.259  |

|                             |                          |                   |                   |                      |                   |                    |                   |                      |                   |                    |                    |                      |                     |                   |                    |                      |
|-----------------------------|--------------------------|-------------------|-------------------|----------------------|-------------------|--------------------|-------------------|----------------------|-------------------|--------------------|--------------------|----------------------|---------------------|-------------------|--------------------|----------------------|
| America                     | 5.94)                    | 7.18)             | 0.90)             |                      | 10.09)            | 12.20)             | 0.90)             |                      | 1.52)             | 1.70)              | (0.19, 0.44)       | (0.01, 0.01)         | (0.01, 0.01)        | (-0.74, 0.20)     |                    |                      |
| Central Asia                | 1.96 (0.80, 3.60)        | 2.00 (0.82, 3.68) | 0.08 (0.06, 0.10) | <0.001               | 3.33 (1.36, 6.13) | 3.40 (1.39, 6.25)  | 0.08 (0.06, 0.10) | <0.001               | 1.13 (0.70, 1.49) | 1.19 (0.87, 1.52)  | 0.15 (0.02, 0.29)  | 0.028 (0.01, 0.02)   | 0.01 (0.01, 0.02)   | 0.02 (0.01, 0.02) | 0.15 (-0.05, 0.34) | 0.147                |
|                             | Eastern Europe           | 2.47 (1.08, 4.49) | 2.67 (1.14, 4.82) | 0.27 (0.23, 0.31)    | <0.001            | 4.20 (1.83, 7.64)  | 4.54 (1.94, 8.19) | 0.27 (0.23, 0.31)    | <0.001            | 0.90 (0.65, 1.24)  | 1.05 (0.73, 1.44)  | 0.53 (0.36, 0.70)    | <0.001 (0.01, 0.01) | 0.01 (0.01, 0.02) | 0.01 (0.01, 0.02)  | 0.70 (0.44, 0.95)    |
| Southern Sub-Saharan Africa |                          | 1.88 (0.79, 3.45) | 1.82 (0.76, 3.38) | -0.09 (-0.14, -0.05) | <0.001            | 3.19 (1.34, 5.87)  | 3.10 (1.30, 5.75) | -0.09 (-0.14, -0.05) | <0.001            | 5.31 (3.54, 7.21)  | 2.63 (1.50, 4.15)  | -2.28 (-3.95, -0.57) | 0.009 (0.06, 0.12)  | 0.09 (0.02, 0.07) | 0.04 (0.02, 0.07)  | -2.46 (-4.27, -0.62) |
|                             | High-income Asia Pacific | 1.22 (0.46, 2.30) | 0.97 (0.32, 1.87) | -0.84 (-0.92, -0.75) | <0.001            | 2.08 (0.78, 3.91)  | 1.65 (0.55, 3.17) | -0.84 (-0.92, -0.75) | <0.001            | 0.89 (0.72, 1.09)  | 0.74 (0.59, 0.92)  | -0.61 (-0.81, -0.41) | <0.001 (0.01, 0.01) | 0.01 (0.01, 0.01) | 0.01 (0.01, 0.01)  | -0.58 (-0.72, -0.44) |
| Central Europe              |                          | 1.78 (0.70, 3.34) | 1.75 (0.70, 3.33) | -0.06 (-0.08, -0.03) | <0.001            | 3.02 (1.19, 5.67)  | 2.98 (1.19, 5.66) | -0.06 (-0.08, -0.03) | <0.001            | 1.20 (0.86, 1.52)  | 1.12 (0.81, 1.48)  | -0.24 (-0.31, -0.17) | <0.001 (0.01, 0.02) | 0.02 (0.01, 0.02) | 0.02 (0.01, 0.02)  | -0.28 (-0.37, -0.18) |
|                             | Andean Latin America     | 0.34 (0.05, 0.78) | 0.40 (0.06, 0.90) | 0.53 (0.44, 0.62)    | <0.001            | 0.58 (0.09, 1.33)  | 0.67 (0.11, 1.52) | 0.53 (0.44, 0.62)    | <0.001            | 1.43 (0.72, 2.77)  | 1.24 (0.75, 2.02)  | -0.54 (-1.07, -0.01) | 0.045 (0.01, 0.05)  | 0.02 (0.01, 0.03) | 0.02 (0.01, 0.03)  | -0.59 (-1.15, -0.03) |
| Caribbean                   |                          | 0.97 (0.33, 1.94) | 0.98 (0.33, 1.94) | 0.02 (0.01, 0.03)    | 0.001             | 1.66 (0.56, 3.30)  | 1.67 (0.56, 3.30) | 0.02 (0.01, 0.03)    | 0.001             | 1.59 (1.05, 2.47)  | 1.61 (0.99, 2.74)  | 0.10 (-0.15, 0.35)   | 0.446 (0.02, 0.04)  | 0.03 (0.02, 0.04) | 0.03 (0.02, 0.04)  | 0.10 (-0.17, 0.37)   |
|                             | Southern Latin America   | 1.39 (0.53, 2.56) | 1.44 (0.58, 2.69) | 0.11 (0.06, 0.16)    | <0.001            | 2.36 (0.89, 4.35)  | 2.44 (0.98, 4.57) | 0.11 (0.06, 0.16)    | <0.001            | 1.21 (0.76, 1.63)  | 1.07 (0.70, 1.42)  | -0.44 (-0.60, -0.28) | <0.001 (0.01, 0.02) | 0.02 (0.01, 0.02) | 0.02 (0.01, 0.02)  | -0.56 (-0.77, -0.34) |
| Oceania                     |                          | 2.89 (1.36, 5.11) | 2.96 (1.39, 5.22) | 0.07 (0.01, 0.12)    | 0.027             | 4.91 (2.31, 8.68)  | 5.03 (2.37, 8.87) | 0.07 (0.01, 0.12)    | 0.026             | 6.79 (3.63, 14.28) | 7.79 (3.86, 16.69) | 0.49 (0.46, 0.53)    | <0.001 (0.06, 0.24) | 0.11 (0.06, 0.28) | 0.13 (0.06, 0.28)  | 0.52 (0.49, 0.56)    |
|                             | Australasia              | 3.44 (1.61, 5.99) | 3.27 (1.51, 5.74) | -0.18 (-0.20, -0.16) | <0.001            | 5.85 (2.74, 10.18) | 5.56 (2.56, 9.76) | -0.18 (-0.20, -0.16) | <0.001            | 1.17 (0.84, 1.65)  | 1.05 (0.73, 1.51)  | -0.34 (-0.40, -0.28) | <0.001 (0.01, 0.01) | 0.01 (0.01, 0.01) | 0.01 (0.01, 0.01)  | -0.50 (-0.64, -0.37) |
| <b>Men</b>                  |                          |                   |                   |                      |                   |                    |                   |                      |                   |                    |                    |                      |                     |                   |                    |                      |

|                                 |             |             |               |        |              |              |              |        |             |             |         |        |        |        |             |        |
|---------------------------------|-------------|-------------|---------------|--------|--------------|--------------|--------------|--------|-------------|-------------|---------|--------|--------|--------|-------------|--------|
| Global                          | 4.27 (2.17, | 3.89 (1.99, | -0.32 (-0.36, | <0.001 | 7.26 (3.68,  | 6.61 (3.39,  | -0.32        | <0.001 | 1.50 (1.09, | 1.51 (1.12, | 0.01    | 0.793  | 0.01   | 0.02   | 0.26 (0.02, | 0.035  |
|                                 | 7.51)       | 6.81)       | -0.28)        |        | 12.77)       | 11.57)       | (-0.36,      |        | 2.07)       | 2.02)       | (-0.10, |        | (0.01, | (0.01, |             |        |
| <b>SDI category</b>             |             |             |               |        |              |              |              |        |             |             |         |        |        |        |             |        |
| High                            | 7.93 (4.26, | 7.88 (4.34, | -0.02 (-0.06, | 0.108  | 13.49 (7.23, | 13.40 (7.37, | -0.02        | 0.109  | 2.26 (1.53, | 2.22 (1.49, | -0.09   | 0.140  | 0.02   | 0.02   | -0.17       | 0.150  |
|                                 | 13.57)      | 13.13)      | 0.00)         |        | 23.06)       | 22.31)       | (-0.06,      |        | 3.27)       | 3.19)       | (-0.20, |        | (0.01, | (0.01, |             |        |
| High-middle                     | 4.68 (2.39, | 4.31 (2.18, | -0.29 (-0.31, | <0.001 | 7.96 (4.06,  | 7.33 (3.71,  | -0.29        | <0.001 | 1.55 (1.08, | 1.45 (1.05, | -0.27   | 0.001  | 0.01   | 0.01   | -0.21       | 0.017  |
|                                 | 8.19)       | 7.63)       | -0.27)        |        | 13.92)       | 12.98)       | (-0.31,      |        | 2.19)       | 2.00)       | (-0.43, |        | (0.01, | (0.01, |             |        |
| Middle                          | 3.16 (1.52, | 3.24 (1.55, | 0.08 (0.07,   | <0.001 | 5.37 (2.59,  | 5.50 (2.64,  | 0.08 (0.07,  | <0.001 | 1.35 (1.04, | 1.48 (1.08, | 0.29    | 0.035  | 0.02   | 0.02   | 0.39 (0.04, | 0.031  |
|                                 | 5.59)       | 5.73)       | 0.10)         |        | 9.50)        | 9.75)        | 0.10)        |        | 1.79)       | 1.94)       | (0.02,  |        | (0.01, | (0.01, |             |        |
| Low-middle                      | 3.03 (1.42, | 3.01 (1.40, | -0.02 (-0.04, | <0.001 | 5.16 (2.41,  | 5.11 (2.37,  | -0.02        | <0.001 | 1.08 (0.78, | 1.28 (0.95, | 0.59    | <0.001 | 0.01   | 0.01   | 0.98 (0.83, | <0.001 |
|                                 | 5.45)       | 5.31)       | -0.01)        |        | 9.27)        | 9.02)        | (-0.04,      |        | 1.49)       | 1.71)       | (0.50,  |        | (0.01, | (0.01, |             |        |
| Low                             | 2.43 (1.09, | 2.43 (1.08, | 0.00 (-0.01,  | 0.838  | 4.14 (1.85,  | 4.14 (1.83,  | 0.00 (-0.01, | 0.828  | 1.20 (0.81, | 1.38 (0.99, | 0.46    | <0.001 | 0.01   | 0.02   | 0.65 (0.51, | <0.001 |
|                                 | 4.34)       | 4.40)       | 0.01)         |        | 7.38)        | 7.47)        | 0.01)        |        | 1.70)       | 1.88)       | (0.40,  |        | (0.01, | (0.01, |             |        |
| <b>21 GBD region</b>            |             |             |               |        |              |              |              |        |             |             |         |        |        |        |             |        |
| South Asia                      | 3.17 (1.47, | 3.16 (1.46, | -0.01 (-0.02, | 0.038  | 5.39 (2.49,  | 5.38 (2.48,  | -0.01        | 0.038  | 0.99 (0.68, | 1.17 (0.84, | 0.58    | <0.001 | 0.01   | 0.01   | 1.06 (0.87, | <0.001 |
|                                 | 5.67)       | 5.62)       | 0.00)         |        | 9.63)        | 9.56)        | (-0.02,      |        | 1.42)       | 1.64)       | (0.48,  |        | (0.01, | (0.01, |             |        |
| East Asia                       | 3.36 (1.64, | 3.52 (1.73, | 0.16 (0.11,   | <0.001 | 5.71 (2.79,  | 5.99 (2.94,  | 0.16 (0.11,  | <0.001 | 1.19 (0.85, | 1.18 (0.85, | -0.05   | 0.684  | 0.01   | 0.01   | -0.24       | 0.314  |
|                                 | 5.88)       | 6.24)       | 0.22)         |        | 9.99)        | 10.61)       | 0.22)        |        | 1.66)       | 1.65)       | (-0.31, |        | (0.01, | (0.01, |             |        |
| North Africa and<br>Middle East | 2.98 (1.45, | 3.03 (1.49, | 0.07 (0.03,   | 0.001  | 5.06 (2.46,  | 5.15 (2.53,  | 0.07 (0.03,  | 0.001  | 1.36 (1.03, | 1.42 (0.98, | 0.12    | 0.001  | 0.02   | 0.02   | 0.20 (0.03, | 0.018  |
|                                 | 5.26)       | 5.39)       | 0.11)         |        | 8.94)        | 9.16)        | 0.11)        |        | 1.84)       | 1.97)       | (0.05,  |        | (0.01, | (0.01, |             |        |
| Western<br>Sub-Saharan Africa   | 2.35 (1.03, | 2.44 (1.09, | 0.13 (0.11,   | <0.001 | 4.00 (1.75,  | 4.15 (1.85,  | 0.13 (0.11,  | <0.001 | 0.86 (0.60, | 0.97 (0.70, | 0.43    | <0.001 | 0.01   | 0.01   | 0.63 (0.53, | <0.001 |
|                                 | 4.24)       | 4.43)       | 0.15)         |        | 7.20)        | 7.53)        | 0.15)        |        | 1.22)       | 1.34)       | (0.36,  |        | (0.01, | (0.01, |             |        |
| Southeast Asia                  | 3.60 (1.75, | 3.74 (1.81, | 0.13 (0.11,   | <0.001 | 6.13 (2.97,  | 6.36 (3.08,  | 0.13 (0.11,  | <0.001 | 1.21 (0.73, | 1.68 (0.80, | 1.12    | <0.001 | 0.01   | 0.02   | 1.78 (1.66, | <0.001 |
| 270                             |             |             |               |        |              |              |              |        |             |             |         |        |        |        |             |        |

|                             | 6.39)              | 6.58)               | 0.15)                |        | 10.86)              | 11.18)               | 0.15)                |        | 1.74)             | 2.37)             | (1.03,         | (0.01, | (0.01,       | 1.91)        |                   |        |
|-----------------------------|--------------------|---------------------|----------------------|--------|---------------------|----------------------|----------------------|--------|-------------------|-------------------|----------------|--------|--------------|--------------|-------------------|--------|
|                             |                    |                     |                      |        |                     |                      |                      |        |                   |                   | 1.21)          | 0.02)  | 0.03)        |              |                   |        |
|                             |                    |                     |                      |        |                     |                      |                      |        |                   |                   | 0.40)          | 0.02)  | 0.02)        | 0.46 (0.31,  | <0.001            |        |
| Eastern Sub-Saharan Africa  | 1.55 (0.64, 2.87)  | 1.61 (0.67, 2.98)   | 0.12 (0.09, 0.15)    | <0.001 | 2.63 (1.08, 4.87)   | 2.73 (1.14, 5.06)    | 0.12 (0.09, 0.15)    | <0.001 | 1.42 (0.80, 2.09) | 1.59 (0.96, 2.39) | (0.28, 0.53)   | <0.001 | (0.01, 0.03) | (0.01, 0.04) | 0.61)             | <0.001 |
| Central Latin America       | 1.71 (0.71, 3.08)  | 1.73 (0.72, 3.14)   | 0.06 (0.04, 0.09)    | <0.001 | 2.90 (1.21, 5.23)   | 2.95 (1.23, 5.33)    | 0.06 (0.04, 0.09)    | <0.001 | 1.36 (0.85, 1.74) | 1.35 (0.86, 1.76) | (-0.15, 0.18)  | 0.863  | (0.01, 0.02) | (0.01, 0.02) | (-0.20, 0.20)     | 0.982  |
| Tropical Latin America      | 2.59 (1.15, 4.71)  | 2.59 (1.16, 4.69)   | 0.09 (-0.01, 0.19)   | 0.068  | 4.41 (1.96, 8.01)   | 4.41 (1.97, 7.97)    | 0.09 (-0.01, 0.19)   | 0.068  | 2.15 (1.57, 2.90) | 2.13 (1.46, 2.69) | (-0.32, 0.51)  | 0.644  | (0.02, 0.04) | (0.02, 0.04) | (-0.22, 0.21)     | 0.951  |
| Central Sub-Saharan Africa  | 2.19 (0.96, 3.96)  | 2.23 (0.96, 4.01)   | 0.06 (0.05, 0.07)    | <0.001 | 3.73 (1.63, 6.74)   | 3.80 (1.64, 6.82)    | 0.06 (0.05, 0.07)    | <0.001 | 1.26 (0.64, 2.84) | 1.36 (0.77, 2.47) | (0.14, 0.31)   | <0.001 | (0.01, 0.04) | (0.01, 0.04) | 0.28 (0.16, 0.40) | <0.001 |
| Western Europe              | 8.34 (4.47, 14.20) | 7.71 (4.13, 13.11)  | -0.27 (-0.29, -0.24) | <0.001 | 14.18 (7.59, 24.13) | 13.11 (7.01, 22.29)  | -0.26 (-0.29, -0.24) | <0.001 | 2.67 (1.58, 3.85) | 2.29 (1.37, 3.38) | (-0.68, -0.38) | <0.001 | (0.01, 0.03) | (0.01, 0.03) | (-1.13, -0.47)    | <0.001 |
| High-income North America   | 9.19 (4.86, 15.68) | 11.00 (6.14, 18.71) | 0.64 (0.55, 0.72)    | <0.001 | 15.62 (8.26, 26.66) | 18.70 (10.45, 31.81) | 0.64 (0.55, 0.72)    | <0.001 | 2.17 (1.40, 3.27) | 2.63 (1.71, 3.92) | (0.50, 0.83)   | <0.001 | (0.01, 0.02) | (0.01, 0.02) | 0.72 (0.40, 1.05) | <0.001 |
| Central Asia                | 5.32 (2.68, 9.17)  | 5.57 (2.78, 9.50)   | 0.16 (0.15, 0.17)    | <0.001 | 9.04 (4.55, 15.58)  | 9.46 (4.72, 16.15)   | 0.16 (0.15, 0.17)    | <0.001 | 1.55 (0.92, 2.29) | 1.68 (1.09, 2.46) | (0.22, 0.33)   | <0.001 | (0.01, 0.02) | (0.01, 0.02) | 0.40 (0.30, 0.52) | <0.001 |
| Eastern Europe              | 6.52 (3.36, 11.33) | 6.93 (3.58, 11.89)  | 0.21 (0.19, 0.23)    | <0.001 | 11.09 (5.71, 19.27) | 11.79 (6.09, 20.21)  | 0.21 (0.19, 0.23)    | <0.001 | 1.66 (1.03, 2.53) | 1.93 (1.30, 2.83) | (0.35, 0.71)   | <0.001 | (0.01, 0.01) | (0.01, 0.02) | 0.92 (0.36, 1.47) | 0.001  |
| Southern Sub-Saharan Africa | 2.51 (1.13, 4.53)  | 2.52 (1.12, 4.51)   | 0.03 (0.01, 0.04)    | <0.001 | 4.26 (1.92, 7.70)   | 4.29 (1.90, 7.67)    | 0.03 (0.01, 0.04)    | <0.001 | 3.68 (2.75, 4.72) | 3.17 (2.27, 4.23) | (-2.07, 0.73)  | 0.344  | (0.04, 0.08) | (0.03, 0.07) | (-2.36, 0.85)     | 0.352  |
| High-income Asia Pacific    | 6.67 (3.54, 11.30) | 6.69 (3.54, 11.32)  | 0.00 (-0.03, 0.04)   | 0.741  | 11.33 (6.02, 19.21) | 11.37 (6.03, 19.24)  | 0.01 (-0.03, 0.04)   | 0.738  | 2.30 (1.63, 3.19) | 1.99 (1.39, 2.84) | (-0.65, -0.38) | <0.001 | (0.02, 0.03) | (0.01, 0.02) | (-1.30, -0.65)    | <0.001 |
| Central Europe              | 6.71 (3.42, 11.00) | 6.64 (3.43, 10.99)  | -0.02 (-0.07, 0.03)  | 0.479  | 11.40 (5.81, 19.21) | 11.29 (5.83, 19.24)  | -0.02 (-0.07, 0.03)  | 0.480  | 1.77 (1.16, 2.38) | 1.81 (1.22, 2.38) | 0.07           | <0.001 | 0.01         | 0.01         | 0.18 (0.10, 0.26) | <0.001 |

|                          |                    |                    |                      |        |                      |                      |                    |        |                    |                    |                |        |              |              |                    |        |
|--------------------------|--------------------|--------------------|----------------------|--------|----------------------|----------------------|--------------------|--------|--------------------|--------------------|----------------|--------|--------------|--------------|--------------------|--------|
|                          | 11.58)             | 11.54)             | 0.03)                |        | 19.68)               | 19.61)               | (-0.07, 0.04)      |        | 2.68)              | 2.67)              | (0.04, 0.11)   |        | (0.01, 0.02) | (0.01, 0.02) | 0.27)              |        |
| Andean Latin America     | 0.57 (0.11, 1.12)  | 0.64 (0.16, 1.29)  | 0.47 (0.38, 0.57)    | <0.001 | 0.96 (0.19, 1.91)    | 1.09 (0.27, 2.19)    | 0.47 (0.38, 0.57)  | <0.001 | 1.95 (1.41, 2.70)  | 2.06 (1.38, 2.89)  | (-0.09, 0.38)  | 0.236  | (0.02, 0.05) | (0.02, 0.05) | 0.13 (-0.12, 0.38) | 0.317  |
| Caribbean                | 1.65 (0.69, 2.96)  | 1.70 (0.71, 3.09)  | 0.10 (0.07, 0.12)    | <0.001 | 2.81 (1.17, 5.04)    | 2.89 (1.21, 5.26)    | 0.10 (0.07, 0.12)  | <0.001 | 2.57 (1.88, 3.52)  | 2.60 (1.87, 3.71)  | (-0.23, 0.30)  | 0.804  | (0.03, 0.06) | (0.03, 0.06) | 0.03 (-0.27, 0.33) | 0.844  |
| Southern Latin America   | 4.02 (2.02, 6.84)  | 4.15 (2.13, 7.18)  | 0.10 (0.07, 0.14)    | <0.001 | 6.83 (3.43, 11.62)   | 7.06 (3.62, 12.21)   | 0.10 (0.07, 0.14)  | <0.001 | 1.60 (1.00, 2.26)  | 1.57 (0.96, 2.20)  | (-0.22, 0.09)  | 0.418  | (0.01, 0.02) | (0.01, 0.02) | (-0.41, 0.07)      | 0.172  |
| Oceania                  | 3.49 (1.68, 6.25)  | 3.53 (1.72, 6.25)  | 0.03 (0.02, 0.04)    | <0.001 | 5.94 (2.86, 10.63)   | 6.00 (2.92, 10.63)   | 0.03 (0.02, 0.04)  | <0.001 | 8.00 (4.90, 16.16) | 9.93 (5.65, 19.11) | (0.53, 0.92)   | <0.001 | (0.08, 0.28) | (0.09, 0.33) | 0.77 (0.56, 0.97)  | <0.001 |
| Australasia              | 9.53 (5.16, 15.94) | 9.12 (4.87, 15.97) | -0.15 (-0.18, -0.11) | <0.001 | 16.20 (8.77, 27.10)  | 15.50 (8.28, 27.15)  | (-0.14, -0.11)     | <0.001 | 2.22 (1.41, 3.44)  | 2.12 (1.34, 3.28)  | (-0.25, -0.05) | 0.004  | (0.01, 0.02) | (0.01, 0.02) | (-0.41, 0.07)      | 0.170  |
| <b>35-39 years Women</b> |                    |                    |                      |        |                      |                      |                    |        |                    |                    |                |        |              |              |                    |        |
| Global                   | 7.42 (3.35, 13.32) | 7.48 (3.44, 13.56) | 0.02 (-0.03, 0.07)   | 0.425  | 28.92 (13.05, 51.95) | 29.18 (13.39, 52.88) | 0.02 (-0.03, 0.07) | 0.424  | 3.39 (1.89, 5.57)  | 3.51 (2.01, 5.73)  | (0.11, 0.20)   | 0.014  | (0.02, 0.02) | (0.02, 0.02) | 0.29 (0.23, 0.35)  | <0.001 |
| <b>SDI category</b>      |                    |                    |                      |        |                      |                      |                    |        |                    |                    |                |        |              |              |                    |        |
| High                     | 6.79 (3.07, 12.32) | 7.59 (3.80, 13.02) | 0.38 (0.36, 0.41)    | <0.001 | 26.48 (11.97, 48.05) | 29.61 (14.83, 50.79) | 0.38 (0.36, 0.41)  | <0.001 | 3.13 (1.75, 5.15)  | 3.30 (1.87, 5.47)  | (0.17, 0.26)   | <0.001 | (0.01, 0.02) | (0.01, 0.02) | (-0.52, -0.12)     | 0.002  |
| High-middle              | 7.45 (3.33, 13.36) | 7.72 (3.49, 14.00) | 0.12 (0.09, 0.15)    | <0.001 | 29.03 (12.98, 52.10) | 30.09 (13.60, 54.59) | 0.12 (0.09, 0.15)  | <0.001 | 3.32 (1.76, 5.60)  | 3.42 (1.81, 5.80)  | (-0.04, 0.20)  | 0.178  | (0.01, 0.02) | (0.01, 0.02) | (-0.15, 0.07)      | 0.432  |
| Middle                   | 8.03 (3.65, 14.36) | 7.91 (3.62, 14.15) | -0.07 (-0.15, 0.01)  | 0.090  | 31.31 (14.25, 55.98) | 30.86 (14.12, 55.19) | (-0.07, -0.01)     | 0.090  | 3.76 (2.10, 6.20)  | 3.85 (2.22, 6.29)  | (0.08, -0.05)  | 0.230  | (0.02, 0.03) | (0.02, 0.03) | 0.32 (0.29, 0.34)  | <0.001 |
| Low-middle               | 7.62 (3.49, 13.75) | 7.53 (3.42, 13.64) | -0.06 (-0.11, 0.00)  | 0.041  | 29.72 (13.60, 45.84) | 29.37 (13.33, 45.40) | -0.06              | 0.042  | 3.22 (1.60, 4.84)  | 3.42 (1.85, 4.99)  | 0.22           | 0.001  | 0.01         | 0.02         | 0.79 (0.59, 0.99)  | <0.001 |



|                              | 2019               | 2020                | 2021                 | 2022   | 2019                 | 2020                 | 2021                  | 2022   | 2019              | 2020              | 2021                 | 2022   | 2019         | 2020         | 2021                 | 2022   |
|------------------------------|--------------------|---------------------|----------------------|--------|----------------------|----------------------|-----------------------|--------|-------------------|-------------------|----------------------|--------|--------------|--------------|----------------------|--------|
| Low                          | 13.76              | 13.62               | -0.00                |        | 53.65                | 53.10                | (-0.11, -0.00)        |        | 5.47              | 5.63              | (0.08, 0.35)         |        | (0.01, 0.02) | (0.01, 0.02) | 0.99                 |        |
|                              | 5.78 (2.51, 10.48) | 5.69 (2.43, 10.30)  | -0.05 (-0.08, -0.02) | <0.001 | 22.53 (9.80, 40.86)  | 22.18 (9.49, 40.16)  | (-0.05, -0.08, -0.02) | <0.001 | 3.07 (1.70, 5.08) | 3.15 (1.81, 5.15) | 0.09 (-0.01, 0.18)   | 0.072  | (0.01, 0.04) | (0.02, 0.04) | 0.26 (0.17, 0.34)    | <0.001 |
| <b>21 GBD region</b>         |                    |                     |                      |        |                      |                      |                       |        |                   |                   |                      |        |              |              |                      |        |
| South Asia                   | 8.39 (3.87, 15.01) | 8.63 (4.01, 15.32)  | 0.10 (0.02, 0.18)    | 0.018  | 32.69 (15.10, 58.53) | 33.66 (15.63, 59.71) | 0.10 (0.02, 0.18)     | 0.018  | 3.18 (1.41, 5.78) | 3.43 (1.72, 5.95) | 0.23 (0.05, 0.41)    | 0.013  | (0.01, 0.02) | (0.01, 0.02) | 0.75 (0.24, 1.25)    | 0.004  |
|                              | 9.44 (4.44, 16.73) | 10.00 (4.64, 17.70) | 0.18 (0.12, 0.24)    | <0.001 | 36.82 (17.29, 65.23) | 38.98 (18.09, 69.04) | 0.18 (0.12, 0.24)     | <0.001 | 3.73 (1.80, 6.60) | 3.83 (1.80, 6.97) | 0.07 (-0.13, 0.28)   | 0.486  | (0.01, 0.01) | (0.01, 0.01) | -0.62 (-0.82, -0.42) | <0.001 |
| North Africa and Middle East | 5.25 (2.20, 9.55)  | 5.31 (2.20, 9.79)   | 0.03 (-0.01, 0.06)   | 0.141  | 20.46 (8.57, 37.22)  | 20.68 (8.58, 38.18)  | 0.03 (-0.01, 0.06)    | 0.132  | 2.69 (1.47, 4.45) | 2.87 (1.62, 4.74) | 0.23 (0.15, 0.31)    | <0.001 | (0.01, 0.02) | (0.01, 0.03) | 0.62 (0.41, 0.84)    | <0.001 |
|                              | 5.41 (2.26, 9.96)  | 5.49 (2.29, 10.16)  | 0.05 (0.04, 0.06)    | <0.001 | 21.08 (8.80, 38.84)  | 21.38 (8.93, 39.62)  | 0.05 (0.04, 0.06)     | <0.001 | 2.33 (1.11, 4.22) | 2.39 (1.17, 4.29) | 0.08 (0.04, 0.12)    | <0.001 | (0.01, 0.01) | (0.01, 0.01) | 0.24 (0.14, 0.35)    | <0.001 |
| Southeast Asia               | 9.13 (4.23, 16.37) | 9.42 (4.36, 16.75)  | 0.10 (0.07, 0.13)    | <0.001 | 35.58 (16.49, 63.84) | 36.72 (17.01, 65.30) | 0.10 (0.07, 0.13)     | <0.001 | 3.97 (2.05, 6.73) | 4.57 (2.52, 7.46) | 0.46 (0.36, 0.56)    | <0.001 | (0.01, 0.03) | (0.02, 0.04) | 1.26 (1.14, 1.38)    | <0.001 |
|                              | 3.29 (1.21, 6.23)  | 3.31 (1.23, 6.23)   | 0.03 (0.01, 0.04)    | 0.001  | 12.81 (4.71, 24.28)  | 12.90 (4.80, 24.29)  | 0.03 (0.01, 0.04)     | 0.001  | 2.91 (1.68, 4.61) | 2.67 (1.65, 4.05) | -0.31 (-0.42, -0.19) | <0.001 | (0.02, 0.06) | (0.02, 0.04) | -0.54 (-0.73, -0.34) | <0.001 |
| Central Latin America        | 3.41 (1.25, 6.45)  | 3.35 (1.21, 6.38)   | -0.07 (-0.11, -0.03) | 0.001  | 13.29 (4.87, 25.14)  | 13.06 (4.73, 24.88)  | (-0.07, -0.11, -0.03) | 0.001  | 3.40 (2.49, 4.70) | 3.13 (2.12, 4.58) | -0.21 (-0.35, -0.08) | 0.002  | (0.04, 0.06) | (0.03, 0.05) | (-0.55, -0.10)       | 0.004  |
|                              | 4.62 (1.85, 8.50)  | 4.67 (1.88, 8.56)   | 0.12 (0.01, 0.22)    | 0.030  | 18.00 (7.22, 33.12)  | 18.20 (7.34, 33.38)  | 0.12 (0.01, 0.22)     | 0.030  | 4.38 (3.20, 6.09) | 4.89 (3.51, 6.57) | 0.40 (0.08, 0.73)    | 0.015  | (0.05, 0.07) | (0.04, 0.07) | 0.54 (0.21, 0.86)    | 0.001  |
| Central Sub-Saharan Africa   | 5.02 (2.08, 8.91)  | 4.93 (2.04, 8.85)   | -0.06 (-0.07, -0.06) | <0.001 | 19.57 (8.12, 34.73)  | 19.21 (7.95, 34.49)  | (-0.06, -0.07, -0.06) | <0.001 | 3.08 (1.62, 5.12) | 2.98 (1.63, 4.86) | -0.14 (-0.21, -0.06) | <0.001 | (0.01, 0.05) | (0.01, 0.05) | (-0.41, -0.05)       | 0.013  |

|                             | 2019        | 2020         | Change        | Signif. | 2019          | 2020          | Change      | Signif. | 2019          | 2020          | Change  | Signif. | 2019  | 2020  | Change       | Signif. |
|-----------------------------|-------------|--------------|---------------|---------|---------------|---------------|-------------|---------|---------------|---------------|---------|---------|-------|-------|--------------|---------|
| Western Europe              | 4.65 (1.87, | 4.14 (1.64,  | -0.39 (-0.41, | <0.001  | 18.12 (7.30,  | 16.14 (6.39,  | -0.39       | <0.001  | 2.82 (1.69,   | 2.37 (1.38,   | -0.60   | <0.001  | 0.02  | 0.02  | -0.92        | <0.001  |
|                             | 8.51)       | 7.67)        | -0.37)        |         | 33.19)        | 29.92)        | (-0.41,     |         | 4.52)         | 3.90)         | (-0.65, |         | 0.03) | 0.02) | (-1.05,      |         |
| High-income North America   | 9.97 (4.88, | 12.74 (6.70, | 0.85 (0.80,   | <0.001  | 38.89 (19.02, | 49.69 (26.13, | 0.85 (0.80, | <0.001  | 3.82 (1.78,   | 4.93 (2.70,   | 0.89    | <0.001  | 0.01  | 0.02  | 1.11 (0.56,  | <0.001  |
|                             | 17.81)      | 21.49)       | 0.90)         |         | 69.45)        | 83.81)        | 0.90)       |         | 6.67)         | 8.29)         | (0.71,  |         | 0.02) | 0.02) | 1.66)        |         |
| Central Asia                | 5.88 (2.41, | 6.01 (2.46,  | 0.08 (0.06,   | <0.001  | 22.92 (9.39,  | 23.43 (9.59,  | 0.08 (0.06, | <0.001  | 2.75 (1.43,   | 2.88 (1.54,   | 0.15    | <0.001  | 0.01  | 0.02  | 0.38 (0.24,  | <0.001  |
|                             | 10.83)      | 11.03)       | 0.10)         |         | 42.22)        | 43.00)        | 0.10)       |         | 4.71)         | 4.89)         | (0.12,  |         | 0.02) | 0.02) | 0.52)        |         |
| Eastern Europe              | 7.41 (3.23, | 8.01 (3.43,  | 0.27 (0.22,   | <0.001  | 28.91 (12.61, | 31.23 (13.37, | 0.27 (0.22, | <0.001  | 2.88 (1.29,   | 3.17 (1.42,   | 0.33    | <0.001  | 0.01  | 0.01  | 0.66 (0.30,  | <0.001  |
|                             | 13.48)      | 14.45)       | 0.32)         |         | 52.58)        | 56.37)        | 0.32)       |         | 5.23)         | 5.73)         | (0.20,  |         | 0.01) | 0.01) | 1.02)        |         |
| Southern Sub-Saharan Africa | 5.63 (2.36, | 5.46 (2.29,  | -0.10 (-0.14, | <0.001  | 21.93 (9.21,  | 21.29 (8.91,  | -0.10       | <0.001  | 8.30 (5.79,   | 4.80 (2.91,   | -1.84   | <0.001  | 0.12  | 0.06  | -2.56        | <0.001  |
|                             | 10.35)      | 10.15)       | -0.06)        |         | 40.35)        | 39.56)        | (-0.14,     |         | 11.00)        | 7.33)         | (-2.58, |         | 0.16) | 0.09) | (-3.59,      |         |
| High-income Asia Pacific    | 3.71 (1.40, | 2.91 (0.97,  | -0.85 (-0.97, | <0.001  | 14.45 (5.47,  | 11.33 (3.79,  | -0.85       | <0.001  | 2.37 (1.45,   | 1.82 (1.06,   | -0.92   | <0.001  | 0.02  | 0.02  | -1.00        | <0.001  |
|                             | 6.92)       | 5.60)        | -0.74)        |         | 27.00)        | 21.85)        | (-0.97,     |         | 3.72)         | 2.99)         | (-1.02, |         | 0.03) | 0.02) | (-1.28,      |         |
| Central Europe              | 5.34 (2.10, | 5.27 (2.11,  | -0.05 (-0.08, | 0.002   | 20.83 (8.19,  | 20.55 (8.22,  | -0.05       | 0.002   | 2.66 (1.45,   | 2.54 (1.35,   | -0.16   | <0.001  | 0.02  | 0.01  | -0.45        | <0.001  |
|                             | 10.03)      | 10.01)       | -0.02)        |         | 39.12)        | 39.05)        | (-0.08,     |         | 4.47)         | 4.30)         | (-0.22, |         | 0.02) | 0.02) | (-0.54,      |         |
| Andean Latin America        | 1.02 (0.16, | 1.19 (0.19,  | 0.53 (0.47,   | <0.001  | 3.97 (0.62,   | 4.64 (0.75,   | 0.53 (0.47, | <0.001  | 3.74 (2.16,   | 3.40 (2.10,   | -0.46   | 0.051   | 0.07  | 0.06  | -0.61        | 0.022   |
|                             | 2.34)       | 2.69)        | 0.59)         |         | 9.12)         | 10.47)        | 0.59)       |         | 6.68)         | 5.27)         | (-0.93, |         | 0.00) | 0.12) | 0.09)        |         |
| Caribbean                   | 2.92 (0.98, | 2.94 (0.99,  | 0.02 (0.01,   | <0.001  | 11.39 (3.84,  | 11.48 (3.85,  | 0.02 (0.01, | <0.001  | 2.53 (1.60,   | 2.57 (1.52,   | 0.04    | 0.711   | 0.03  | 0.03  | 0.12 (-0.19, | 0.442   |
|                             | 5.83)       | 5.83)        | 0.04)         |         | 22.72)        | 22.74)        | 0.04)       |         | 3.97)         | 4.20)         | (-0.18, |         | 0.05) | 0.05) | 0.43)        |         |
| Southern Latin America      | 4.15 (1.57, | 4.31 (1.73,  | 0.11 (0.08,   | <0.001  | 16.20 (6.13,  | 16.79 (6.74,  | 0.11 (0.08, | <0.001  | 2.90 (1.67,   | 2.72 (1.60,   | -0.22   | <0.001  | 0.03  | 0.02  | -0.60        | <0.001  |
|                             | 7.68)       | 8.05)        | 0.13)         |         | 29.92)        | 31.38)        | 0.13)       |         | 4.47)         | 4.30)         | (-0.32, |         | 0.04) | 0.03) | (-0.85,      |         |
| Oceania                     | 8.67 (4.08, | 8.87 (4.19,  | 0.07 (0.01,   | 0.021   | 33.80 (15.91, | 34.59 (16.32, | 0.07 (0.01, | 0.021   | 25.31 (13.58, | 30.78 (15.50, | 0.64    | <0.001  | 0.44  | 0.54  | 0.70 (0.58,  | <0.001  |
|                             | 15.32)      | 15.65)       | 0.12)         |         | 59.74)        | 61.00)        | 0.12)       |         | 50.66)        | 65.26)        | (0.53,  |         | 0.94) | 1.23) | 0.82)        |         |

|                              | 2019                 | 2020                 | Change (95% CI)      | P      | 2019                  | 2020                  | Change (95% CI)      | P      | 2019               | 2020               | Change (95% CI)      | P      | 2019              | 2020              | Change (95% CI)      | P      |
|------------------------------|----------------------|----------------------|----------------------|--------|-----------------------|-----------------------|----------------------|--------|--------------------|--------------------|----------------------|--------|-------------------|-------------------|----------------------|--------|
| Australasia                  | 10.32 (4.84, 17.96)  | 9.80 (4.52, 17.21)   | -0.18 (-0.20, -0.16) | <0.001 | 40.23 (18.87, 70.06)  | 38.23 (17.64, 67.11)  | -0.18 (-0.20, -0.16) | <0.001 | 3.85 (0.87, 8.79)  | 3.63 (0.76, 8.44)  | -0.16 (-0.21, -0.11) | <0.001 | 0.01 (0.01, 0.01) | 0.01 (0.01, 0.01) | -0.26 (-0.59, 0.08)  | 0.133  |
| <b>Men</b>                   |                      |                      |                      |        |                       |                       |                      |        |                    |                    |                      |        |                   |                   |                      |        |
| Global                       | 12.90 (6.55, 22.69)  | 11.91 (6.10, 20.82)  | -0.26 (-0.33, -0.20) | <0.001 | 50.32 (25.52, 88.49)  | 46.45 (23.77, 81.19)  | -0.26 (-0.33, -0.20) | <0.001 | 5.66 (3.26, 9.27)  | 5.56 (3.35, 8.80)  | -0.05 (-0.09, -0.00) | 0.032  | 0.03 (0.02, 0.03) | 0.03 (0.02, 0.04) | 0.51 (0.39, 0.63)    | <0.001 |
| <b>SDI category</b>          |                      |                      |                      |        |                       |                       |                      |        |                    |                    |                      |        |                   |                   |                      |        |
| High                         | 23.73 (12.73, 40.52) | 23.51 (12.94, 39.13) | -0.01 (-0.08, 0.05)  | 0.666  | 92.56 (49.64, 158.13) | 91.72 (50.49, 152.70) | -0.01 (-0.08, 0.05)  | 0.671  | 9.54 (5.20, 16.40) | 9.33 (5.22, 15.08) | -0.07 (-0.17, 0.02)  | 0.147  | 0.03 (0.02, 0.04) | 0.03 (0.02, 0.04) | -0.30 (-0.56, -0.04) | 0.021  |
| High-middle                  | 14.06 (7.17, 24.57)  | 13.25 (6.77, 23.35)  | -0.20 (-0.24, -0.17) | <0.001 | 54.85 (27.98, 95.85)  | 51.67 (26.40, 91.07)  | -0.20 (-0.23, -0.17) | <0.001 | 5.95 (3.28, 10.01) | 5.67 (3.11, 9.52)  | -0.17 (-0.22, -0.11) | <0.001 | 0.03 (0.02, 0.03) | 0.02 (0.02, 0.03) | -0.10 (-0.20, 0.00)  | 0.052  |
| Middle                       | 9.51 (4.60, 16.79)   | 9.66 (4.62, 17.13)   | 0.05 (0.04, 0.07)    | <0.001 | 37.08 (17.95, 65.49)  | 37.68 (18.00, 66.80)  | 0.05 (0.04, 0.07)    | <0.001 | 4.60 (2.69, 7.36)  | 5.13 (3.14, 8.05)  | 0.39 (0.34, 0.45)    | <0.001 | 0.03 (0.02, 0.03) | 0.04 (0.03, 0.04) | 1.08 (0.91, 1.26)    | <0.001 |
| Low-middle                   | 9.13 (4.27, 16.40)   | 9.02 (4.18, 15.89)   | -0.04 (-0.05, -0.03) | <0.001 | 35.58 (16.63, 63.96)  | 35.16 (16.30, 61.98)  | -0.04 (-0.05, -0.03) | <0.001 | 4.16 (2.29, 7.08)  | 4.58 (2.67, 7.25)  | 0.34 (0.18, 0.50)    | <0.001 | 0.02 (0.02, 0.03) | 0.03 (0.02, 0.04) | 1.15 (0.74, 1.56)    | <0.001 |
| Low                          | 7.38 (3.31, 13.15)   | 7.35 (3.26, 13.27)   | -0.01 (-0.03, 0.00)  | 0.133  | 28.76 (12.91, 51.27)  | 28.64 (12.69, 51.74)  | -0.01 (-0.03, 0.00)  | 0.141  | 3.72 (2.02, 6.18)  | 3.85 (2.24, 6.26)  | 0.12 (0.04, 0.20)    | 0.005  | 0.02 (0.01, 0.04) | 0.03 (0.02, 0.04) | 0.32 (0.12, 0.52)    | 0.002  |
| <b>21 GBD region</b>         |                      |                      |                      |        |                       |                       |                      |        |                    |                    |                      |        |                   |                   |                      |        |
| South Asia                   | 9.51 (4.40, 17.01)   | 9.49 (4.38, 16.86)   | -0.01 (-0.01, 0.00)  | 0.076  | 37.09 (17.16, 66.30)  | 37.01 (17.08, 65.76)  | -0.01 (-0.01, 0.00)  | 0.082  | 4.07 (2.17, 6.92)  | 4.51 (2.47, 7.27)  | 0.36 (0.11, 0.61)    | 0.005  | 0.02 (0.01, 0.03) | 0.03 (0.02, 0.04) | 1.29 (0.32, 2.26)    | 0.009  |
| East Asia                    | 10.06 (4.91, 17.61)  | 10.57 (5.19, 18.71)  | 0.17 (0.11, 0.22)    | <0.001 | 39.23 (19.16, 68.67)  | 41.23 (20.24, 72.98)  | 0.17 (0.11, 0.22)    | <0.001 | 4.03 (1.97, 6.99)  | 4.12 (2.01, 7.26)  | 0.06 (0.02, 0.11)    | 0.008  | 0.01 (0.01, 0.01) | 0.01 (0.01, 0.01) | -0.37 (-0.68, -0.05) | 0.022  |
| North Africa and Middle East | 8.93 (4.35, 15.78)   | 9.08 (4.45, 16.14)   | 0.06 (0.04, 0.07)    | <0.001 | 34.81 (16.94, 61.52)  | 35.43 (17.36, 62.96)  | 0.06 (0.04, 0.08)    | <0.001 | 4.22 (2.35, 7.02)  | 4.29 (2.37, 7.19)  | 0.07 (0.02, 0.12)    | 0.005  | 0.02 (0.02, 0.04) | 0.02 (0.02, 0.04) | 0.08 (-0.09, 0.25)   | 0.372  |

|                             |                      |                      |                      |        |                        |                        |                      |        |                     |                     |                      |        |                   |                   |                      |        |
|-----------------------------|----------------------|----------------------|----------------------|--------|------------------------|------------------------|----------------------|--------|---------------------|---------------------|----------------------|--------|-------------------|-------------------|----------------------|--------|
| Western Sub-Saharan Africa  | 7.06 (3.09, 12.72)   | 7.33 (3.27, 13.28)   | 0.13 (0.11, 0.15)    | <0.001 | 27.54 (12.06, 49.57)   | 28.57 (12.75, 51.80)   | 0.13 (0.11, 0.15)    | <0.001 | 2.88 (1.41, 5.12)   | 3.04 (1.51, 5.48)   | 0.23 (0.19, 0.26)    | <0.001 | 0.01 (0.01, 0.01) | 0.01 (0.01, 0.02) | 0.36 (0.27, 0.46)    | <0.001 |
| Southeast Asia              | 10.82 (5.24, 19.16)  | 11.23 (5.43, 19.69)  | 0.13 (0.11, 0.14)    | <0.001 | 42.17 (20.45, 74.70)   | 43.78 (21.17, 76.78)   | 0.13 (0.11, 0.14)    | <0.001 | 6.40 (4.17, 9.79)   | 7.78 (4.97, 11.55)  | 0.69 (0.61, 0.77)    | <0.001 | 0.05 (0.04, 0.07) | 0.08 (0.05, 0.10) | 1.33 (1.18, 1.49)    | <0.001 |
| Eastern Sub-Saharan Africa  | 4.65 (1.91, 8.59)    | 4.82 (2.01, 8.92)    | 0.12 (0.09, 0.16)    | <0.001 | 18.11 (7.44, 33.48)    | 18.80 (7.82, 34.78)    | 0.12 (0.09, 0.16)    | <0.001 | 3.50 (2.00, 5.70)   | 3.47 (2.05, 5.49)   | -0.03 (-0.15, 0.09)  | 0.581  | 0.04 (0.02, 0.07) | 0.03 (0.02, 0.05) | -0.18 (-0.30, -0.06) | 0.003  |
| Central Latin America       | 5.12 (2.14, 9.23)    | 5.21 (2.16, 9.40)    | 0.06 (0.04, 0.08)    | <0.001 | 19.96 (8.33, 35.99)    | 20.30 (8.43, 36.66)    | 0.06 (0.04, 0.08)    | <0.001 | 3.35 (2.05, 5.13)   | 3.37 (2.03, 5.21)   | 0.02 (-0.21, 0.26)   | 0.843  | 0.03 (0.02, 0.04) | 0.03 (0.02, 0.04) | -0.00 (-0.33, 0.32)  | 0.983  |
| Tropical Latin America      | 7.77 (3.46, 14.12)   | 7.79 (3.48, 14.07)   | 0.10 (0.01, 0.19)    | 0.029  | 30.30 (13.47, 55.07)   | 30.36 (13.57, 54.86)   | 0.10 (0.01, 0.19)    | 0.029  | 5.78 (3.74, 8.56)   | 5.70 (3.74, 8.19)   | -0.01 (-0.24, 0.21)  | 0.894  | 0.06 (0.04, 0.09) | 0.06 (0.04, 0.08) | -0.14 (-0.35, 0.07)  | 0.187  |
| Central Sub-Saharan Africa  | 6.58 (2.88, 11.90)   | 6.70 (2.89, 12.04)   | 0.06 (0.05, 0.07)    | <0.001 | 25.65 (11.23, 46.39)   | 26.11 (11.26, 46.92)   | 0.06 (0.05, 0.07)    | <0.001 | 3.95 (1.47, 8.79)   | 3.96 (1.56, 7.74)   | 0.08 (0.00, 0.15)    | 0.038  | 0.03 (0.01, 0.11) | 0.03 (0.02, 0.08) | -0.05 (-0.17, 0.07)  | 0.431  |
| Western Europe              | 24.98 (13.40, 42.51) | 22.93 (12.25, 38.97) | -0.29 (-0.31, -0.26) | <0.001 | 97.47 (52.27, 165.85)  | 89.44 (47.77, 152.08)  | -0.29 (-0.31, -0.26) | <0.001 | 11.11 (6.31, 18.44) | 9.62 (5.21, 15.84)  | -0.48 (-0.57, -0.40) | <0.001 | 0.05 (0.03, 0.07) | 0.04 (0.02, 0.05) | -1.13 (-1.40, -0.85) | <0.001 |
| High-income North America   | 27.54 (14.58, 46.99) | 32.94 (18.42, 55.97) | 0.63 (0.57, 0.68)    | <0.001 | 107.43 (56.87, 183.38) | 128.51 (71.85, 218.45) | 0.63 (0.57, 0.68)    | <0.001 | 10.22 (5.22, 17.18) | 12.39 (6.80, 20.95) | 0.66 (0.55, 0.78)    | <0.001 | 0.02 (0.02, 0.04) | 0.03 (0.02, 0.04) | 1.13 (0.69, 1.57)    | <0.001 |
| Central Asia                | 15.96 (8.04, 27.50)  | 16.70 (8.34, 28.50)  | 0.16 (0.15, 0.18)    | <0.001 | 62.24 (31.36, 107.24)  | 65.14 (32.51, 111.16)  | 0.16 (0.15, 0.18)    | <0.001 | 6.69 (3.30, 11.71)  | 7.29 (3.75, 12.86)  | 0.30 (0.07, 0.54)    | 0.012  | 0.03 (0.01, 0.04) | 0.03 (0.02, 0.04) | 0.57 (-0.28, 1.43)   | 0.190  |
| Eastern Europe              | 19.55 (10.06, 33.96) | 20.79 (10.74, 35.64) | 0.21 (0.19, 0.24)    | <0.001 | 76.25 (39.24, 132.50)  | 81.09 (41.87, 139.04)  | 0.21 (0.19, 0.24)    | <0.001 | 6.95 (3.29, 12.70)  | 7.65 (3.86, 13.35)  | 0.34 (0.26, 0.43)    | <0.001 | 0.01 (0.01, 0.01) | 0.01 (0.01, 0.02) | 1.14 (0.47, 1.82)    | 0.001  |
| Southern Sub-Saharan Africa | 7.51 (3.38, 13.57)   | 7.56 (3.35, 13.53)   | 0.03 (0.01, 0.04)    | <0.001 | 29.29 (13.18, 52.91)   | 29.46 (13.07, 52.75)   | 0.03 (0.01, 0.04)    | <0.001 | 6.93 (4.58, 9.74)   | 5.88 (3.70, 8.74)   | -0.57 (-0.96, -0.18) | 0.004  | 0.09 (0.06, 0.12) | 0.07 (0.04, 0.09) | -0.92 (-1.60, -0.23) | 0.009  |

|                          |                         |                         |                      |        |                        |                        |                         |        |                     |                     |                         |        |                      |                      |                         |        |
|--------------------------|-------------------------|-------------------------|----------------------|--------|------------------------|------------------------|-------------------------|--------|---------------------|---------------------|-------------------------|--------|----------------------|----------------------|-------------------------|--------|
| High-income Asia Pacific | 19.59<br>(10.41, 33.01) | 20.07<br>(10.66, 33.95) | 0.07 (0.04, 0.11)    | <0.001 | 76.42 (40.60, 128.77)  | 78.30 (41.56, 132.47)  | 0.07 (0.04, 0.11)       | <0.001 | 7.86 (3.97, 13.80)  | 7.79 (3.85, 14.08)  | -0.03<br>(-0.12, 0.06)  | 0.487  | 0.03<br>(0.01, 0.04) | 0.02<br>(0.01, 0.03) | -0.80<br>(-1.00, -0.61) | <0.001 |
| Central Europe           | 20.16<br>(10.28, 34.74) | 19.93<br>(10.31, 34.61) | -0.02 (-0.09, 0.04)  | 0.489  | 78.62 (40.08, 135.51)  | 77.75 (40.19, 135.02)  | -0.02<br>(-0.09, 0.04)  | 0.494  | 8.61 (4.80, 14.34)  | 8.28 (4.47, 14.33)  | -0.15<br>(-0.23, -0.06) | 0.001  | 0.04<br>(0.03, 0.05) | 0.03<br>(0.02, 0.04) | -0.72<br>(-0.98, -0.45) | <0.001 |
| Andean Latin America     | 1.70 (0.34, 3.37)       | 1.93 (0.47, 3.87)       | 0.47 (0.34, 0.61)    | <0.001 | 6.61 (1.32, 13.15)     | 7.53 (1.83, 15.08)     | 0.47 (0.34, 0.61)       | <0.001 | 4.10 (2.80, 5.80)   | 3.80 (2.50, 5.41)   | -0.24<br>(-0.50, 0.02)  | 0.075  | 0.07<br>(0.05, 0.10) | 0.06<br>(0.04, 0.09) | -0.39<br>(-0.77, -0.01) | 0.044  |
| Caribbean                | 4.96 (2.05, 8.89)       | 5.11 (2.14, 9.29)       | 0.10 (0.07, 0.13)    | <0.001 | 19.33 (8.00, 34.66)    | 19.92 (8.34, 36.22)    | 0.10 (0.07, 0.13)       | <0.001 | 3.90 (2.57, 5.69)   | 4.27 (2.85, 6.17)   | 0.32<br>(0.16, 0.47)    | <0.001 | 0.04<br>(0.03, 0.06) | 0.05<br>(0.03, 0.07) | 0.53 (0.23, 0.83)       | 0.001  |
| Southern Latin America   | 12.03 (6.04, 20.43)     | 12.44 (6.38, 21.50)     | 0.11 (0.07, 0.15)    | <0.001 | 46.90 (23.56, 79.66)   | 48.53 (24.88, 83.86)   | 0.11 (0.07, 0.15)       | <0.001 | 6.21 (2.68, 11.73)  | 6.20 (2.77, 11.57)  | -0.04<br>(-0.31, 0.23)  | 0.763  | 0.04<br>(0.02, 0.07) | 0.04<br>(0.02, 0.06) | -0.17<br>(-0.72, 0.38)  | 0.531  |
| Oceania                  | 10.47 (5.06, 18.75)     | 10.59 (5.16, 18.76)     | 0.03 (0.02, 0.04)    | <0.001 | 40.84 (19.72, 73.09)   | 41.28 (20.10, 73.14)   | 0.03 (0.02, 0.05)       | <0.001 | 10.93 (6.39, 20.00) | 12.14 (7.28, 20.25) | 0.39<br>(0.37, 0.42)    | <0.001 | 0.14<br>(0.09, 0.30) | 0.17<br>(0.10, 0.30) | 0.52 (0.43, 0.61)       | <0.001 |
| Australasia              | 28.58<br>(15.47, 47.73) | 27.34<br>(14.62, 47.86) | -0.15 (-0.18, -0.11) | <0.001 | 111.49 (60.33, 186.26) | 106.66 (57.01, 186.76) | -0.15<br>(-0.18, -0.11) | <0.001 | 10.69 (4.43, 21.29) | 10.38 (4.25, 20.14) | -0.04<br>(-0.34, 0.26)  | 0.770  | 0.03<br>(0.02, 0.04) | 0.03<br>(0.02, 0.05) | 0.30 (-0.28, 0.89)      | 0.306  |
| <b>Aortic aneurysm</b>   |                         |                         |                      |        |                        |                        |                         |        |                     |                     |                         |        |                      |                      |                         |        |
| <b>15-19 years</b>       |                         |                         |                      |        |                        |                        |                         |        |                     |                     |                         |        |                      |                      |                         |        |
| <b>Women</b>             |                         |                         |                      |        |                        |                        |                         |        |                     |                     |                         |        |                      |                      |                         |        |
| Global                   | —                       | —                       | —                    | —      | —                      | —                      | —                       | —      | 1.52 (1.32, 2.44)   | 1.51 (1.33, 1.83)   | -0.04<br>(-0.14, 0.07)  | 0.528  | 0.02<br>(0.02, 0.03) | 0.02<br>(0.02, 0.03) | -0.03<br>(-0.14, 0.07)  | 0.533  |
| <b>SDI category</b>      |                         |                         |                      |        |                        |                        |                         |        |                     |                     |                         |        |                      |                      |                         |        |
| High                     | —                       | —                       | —                    | —      | —                      | —                      | —                       | —      | 1.81 (1.67, 1.98)   | 1.29 (1.14, 1.41)   | -1.13<br>(-1.30, -0.96) | <0.001 | 0.03<br>(0.02, 0.03) | 0.02<br>(0.02, 0.02) | -1.13<br>(-1.30, -0.96) | <0.001 |
| High-middle              | —                       | —                       | —                    | —      | —                      | —                      | —                       | —      | 1.94 (1.74, 2.29)   | 2.09 (1.84, 2.33)   | 0.25<br>(-0.10, 0.00)   | 0.165  | 0.03<br>(0.02, 0.03) | 0.03<br>(0.03, 0.03) | 0.25 (-0.10, 0.61)      | 0.163  |



|                             |   |   |   |   |   |   |   |   |   |             |             |         |        |        |              |         |        |
|-----------------------------|---|---|---|---|---|---|---|---|---|-------------|-------------|---------|--------|--------|--------------|---------|--------|
| America                     |   |   |   |   |   |   |   |   |   | 2.27)       | 3.62)       | (1.56,  | (0.03, | (0.04, | 1.79)        |         |        |
|                             |   |   |   |   |   |   |   |   |   |             |             | 1.79)   | 0.03)  | 0.05)  |              |         |        |
| Central Sub-Saharan Africa  | — | — | — | — | — | — | — | — | — | 1.84 (0.83, | 1.63 (0.91, | -0.44   | 0.03   | 0.02   | -0.44        |         |        |
|                             |   |   |   |   |   |   |   |   |   | 4.01)       | 2.72)       | (-0.54, | <0.001 | (0.01, | (0.01,       | (-0.55, | <0.001 |
|                             |   |   |   |   |   |   |   |   |   |             |             | -0.33)  | 0.06)  | 0.04)  | -0.33)       |         |        |
| Western Europe              | — | — | — | — | — | — | — | — | — | 1.92 (1.72, | 1.46 (1.23, | -1.01   | 0.03   | 0.02   | -1.00        |         |        |
|                             |   |   |   |   |   |   |   |   |   | 2.17)       | 1.66)       | (-1.20, | <0.001 | (0.02, | (0.02,       | (-1.20, | <0.001 |
|                             |   |   |   |   |   |   |   |   |   |             |             | -0.81)  | 0.03)  | 0.02)  | -0.81)       |         |        |
| High-income North America   | — | — | — | — | — | — | — | — | — | 2.61 (2.38, | 1.41 (1.23, | -2.00   | 0.04   | 0.02   | -2.00        |         |        |
|                             |   |   |   |   |   |   |   |   |   | 2.88)       | 1.58)       | (-2.67, | <0.001 | (0.03, | (0.02,       | (-2.66, | <0.001 |
|                             |   |   |   |   |   |   |   |   |   |             |             | -1.34)  | 0.04)  | 0.02)  | -1.34)       |         |        |
| Central Asia                | — | — | — | — | — | — | — | — | — | 1.01 (0.82, | 1.22 (0.96, | 0.61    | 0.01   | 0.02   | 0.61 (0.43,  |         |        |
|                             |   |   |   |   |   |   |   |   |   | 1.25)       | 1.54)       | (0.43,  | <0.001 | (0.01, | (0.01,       | 0.79)   | <0.001 |
|                             |   |   |   |   |   |   |   |   |   |             |             | 0.80)   | 0.02)  | 0.02)  |              |         |        |
| Eastern Europe              | — | — | — | — | — | — | — | — | — | 2.73 (2.44, | 3.94 (3.24, | 1.32    | 0.04   | 0.06   | 1.32 (0.33,  |         |        |
|                             |   |   |   |   |   |   |   |   |   | 3.00)       | 4.65)       | (0.32,  | 0.009  | (0.03, | (0.05,       | 2.33)   | 0.009  |
|                             |   |   |   |   |   |   |   |   |   |             |             | 2.33)   | 0.04)  | 0.07)  |              |         |        |
| Southern Sub-Saharan Africa | — | — | — | — | — | — | — | — | — | 3.09 (2.40, | 1.65 (1.10, | -2.13   | 0.04   | 0.02   | -2.13        |         |        |
|                             |   |   |   |   |   |   |   |   |   | 3.88)       | 2.38)       | (-2.62, | <0.001 | (0.03, | (0.02,       | (-2.63, | <0.001 |
|                             |   |   |   |   |   |   |   |   |   |             |             | -1.63)  | 0.05)  | 0.03)  | -1.63)       |         |        |
| High-income Asia Pacific    | — | — | — | — | — | — | — | — | — | 0.89 (0.78, | 0.99 (0.77, | 0.36    | 0.01   | 0.01   | 0.36 (0.07,  |         |        |
|                             |   |   |   |   |   |   |   |   |   | 1.09)       | 1.15)       | (0.06,  | 0.019  | (0.01, | (0.01,       | 0.66)   | 0.016  |
|                             |   |   |   |   |   |   |   |   |   |             |             | 0.66)   | 0.02)  | 0.02)  |              |         |        |
| Central Europe              | — | — | — | — | — | — | — | — | — | 2.15 (1.83, | 2.61 (2.09, | 0.71    | 0.03   | 0.04   | 0.71 (0.40,  |         |        |
|                             |   |   |   |   |   |   |   |   |   | 2.55)       | 3.19)       | (0.40,  | <0.001 | (0.03, | (0.03,       | 1.03)   | <0.001 |
|                             |   |   |   |   |   |   |   |   |   |             |             | 1.03)   | 0.04)  | 0.04)  |              |         |        |
| Andean Latin America        | — | — | — | — | — | — | — | — | — | 4.65 (3.05, | 4.31 (2.73, | -0.34   | 0.07   | 0.06   | -0.34        |         |        |
|                             |   |   |   |   |   |   |   |   |   | 7.01)       | 6.16)       | (-0.91, | 0.249  | (0.04, | (0.04,       | (-0.91, | 0.248  |
|                             |   |   |   |   |   |   |   |   |   |             |             | 0.24)   | 0.10)  | 0.09)  | 0.24)        |         |        |
| Caribbean                   | — | — | — | — | — | — | — | — | — | 1.01 (0.81, | 1.03 (0.71, | 0.12    | 0.01   | 0.01   | 0.12 (-0.09, |         |        |
|                             |   |   |   |   |   |   |   |   |   | 1.57)       | 1.79)       | (-0.09, | 0.266  | (0.01, | (0.01,       | 0.34)   | 0.266  |
|                             |   |   |   |   |   |   |   |   |   |             |             | 0.34)   | 0.02)  | 0.03)  |              |         |        |
| Southern Latin America      | — | — | — | — | — | — | — | — | — | 3.19 (2.53, | 2.88 (2.28, | -0.36   | 0.002  | 0.04   | 0.04         | -0.36   | 0.002  |

|                      |   |   |   |   |   |   |   |   |             |             |         |        |        |              |              |        |
|----------------------|---|---|---|---|---|---|---|---|-------------|-------------|---------|--------|--------|--------------|--------------|--------|
| America              |   |   |   |   |   |   |   |   | 4.04)       | 3.58)       | (-0.59, | (0.04, | (0.03, | (-0.59,      |              |        |
|                      |   |   |   |   |   |   |   |   |             |             | -0.14)  | 0.06)  | 0.05)  | -0.14)       |              |        |
|                      |   |   |   |   |   |   |   |   |             |             | 0.91    | 0.01   | 0.01   | 0.91 (0.50,  |              |        |
| Oceania              | — | — | — | — | — | — | — | — | 0.48 (0.30, | 0.63 (0.38, | (0.50,  | <0.001 | (0.00, | (0.01,       | 0.91 (0.50,  | <0.001 |
|                      |   |   |   |   |   |   |   |   | 0.77)       | 1.02)       | 1.33)   |        | 0.01)  | 0.01)        | 1.33)        |        |
|                      |   |   |   |   |   |   |   |   |             |             | -2.53   | 0.03   | 0.01   | -2.53        |              |        |
| Australasia          | — | — | — | — | — | — | — | — | 1.85 (1.43, | 0.86 (0.62, | (-3.35, | <0.001 | (0.02, | (0.01,       | (-3.35,      | <0.001 |
|                      |   |   |   |   |   |   |   |   | 2.41)       | 1.19)       | -1.70)  |        | 0.03)  | 0.02)        | -1.71)       |        |
| <b>Men</b>           |   |   |   |   |   |   |   |   |             |             |         |        |        |              |              |        |
|                      |   |   |   |   |   |   |   |   |             |             | -0.51   | 0.06   | 0.05   | -0.50        |              |        |
| Global               | — | — | — | — | — | — | — | — | 4.27 (3.32, | 3.73 (3.19, | (-0.82, | 0.002  | (0.05, | (0.04,       | (-0.82,      | 0.002  |
|                      |   |   |   |   |   |   |   |   | 5.48)       | 4.28)       | -0.19)  |        | 0.08)  | 0.06)        | -0.19)       |        |
| <b>SDI category</b>  |   |   |   |   |   |   |   |   |             |             |         |        |        |              |              |        |
|                      |   |   |   |   |   |   |   |   |             |             | -2.33   | 0.08   | 0.04   | -2.33        |              |        |
| High                 | — | — | — | — | — | — | — | — | 6.04 (5.40, | 3.08 (2.75, | (-2.81, | <0.001 | (0.08, | (0.04,       | (-2.80,      | <0.001 |
|                      |   |   |   |   |   |   |   |   | 6.71)       | 3.52)       | -1.85)  |        | 0.09)  | 0.05)        | -1.85)       |        |
|                      |   |   |   |   |   |   |   |   |             |             | -0.67   | 0.08   | 0.07   | -0.67        |              |        |
| High-middle          | — | — | — | — | — | — | — | — | 5.87 (4.91, | 4.86 (4.21, | (-1.23, | 0.019  | (0.07, | (0.06,       | (-1.23,      | 0.020  |
|                      |   |   |   |   |   |   |   |   | 7.09)       | 5.73)       | -0.11)  |        | 0.10)  | 0.08)        | -0.11)       |        |
|                      |   |   |   |   |   |   |   |   |             |             | 0.39    | 0.05   | 0.06   | 0.40 (0.27,  |              |        |
| Middle               | — | — | — | — | — | — | — | — | 3.71 (2.82, | 4.15 (3.35, | (0.26,  | <0.001 | (0.04, | (0.05,       | 0.40 (0.27,  | <0.001 |
|                      |   |   |   |   |   |   |   |   | 4.80)       | 5.23)       | 0.52)   |        | 0.07)  | 0.07)        | 0.52)        |        |
|                      |   |   |   |   |   |   |   |   |             |             | 0.35    | 0.04   | 0.04   | 0.36 (0.02,  |              |        |
| Low-middle           | — | — | — | — | — | — | — | — | 2.84 (1.65, | 3.10 (2.39, | (0.02,  | 0.039  | (0.02, | (0.03,       | 0.36 (0.02,  | 0.036  |
|                      |   |   |   |   |   |   |   |   | 4.58)       | 3.90)       | 0.69)   |        | 0.06)  | 0.05)        | 0.69)        |        |
|                      |   |   |   |   |   |   |   |   |             |             | -0.69   | 0.06   | 0.05   | -0.69        |              |        |
| Low                  | — | — | — | — | — | — | — | — | 4.23 (1.93, | 3.48 (2.12, | (-1.04, | <0.001 | (0.03, | (0.03,       | (-1.04,      | <0.001 |
|                      |   |   |   |   |   |   |   |   | 7.51)       | 5.10)       | -0.35)  |        | 0.11)  | 0.07)        | -0.34)       |        |
| <b>21 GBD region</b> |   |   |   |   |   |   |   |   |             |             |         |        |        |              |              |        |
|                      |   |   |   |   |   |   |   |   |             |             | 0.31    | 0.03   | 0.03   | 0.31 (-0.54, |              |        |
| South Asia           | — | — | — | — | — | — | — | — | 2.06 (0.96, | 2.18 (1.49, | (-0.55, | 0.481  | (0.01, | (0.02,       | 0.31 (-0.54, | 0.475  |
|                      |   |   |   |   |   |   |   |   | 3.79)       | 2.93)       | 1.17)   |        | 0.05)  | 0.04)        | 1.17)        |        |
|                      |   |   |   |   |   |   |   |   |             |             | -1.57   | <0.001 | 0.05   | 0.03         | -1.56        | <0.001 |
| East Asia            | — | — | — | — | — | — | — | — | 3.46 (2.28, | 2.23 (1.70, | -1.57   |        |        |              |              |        |



|                              |   |   |   |   |   |   |   |   |   |                    |                   |                |        |              |              |                    |        |
|------------------------------|---|---|---|---|---|---|---|---|---|--------------------|-------------------|----------------|--------|--------------|--------------|--------------------|--------|
|                              |   |   |   |   |   |   |   |   |   | 4.92)              | 2.87)             | (-1.96,        | (0.03, | (0.02,       | (-1.95,      |                    |        |
|                              |   |   |   |   |   |   |   |   |   |                    |                   | -1.19)         | 0.07)  | 0.04)        | -1.18)       |                    |        |
|                              |   |   |   |   |   |   |   |   |   |                    |                   | -0.14          | 0.09   | 0.08         | -0.13        |                    |        |
| North Africa and Middle East | — | — | — | — | — | — | — | — | — | 6.28 (3.91, 9.25)  | 5.96 (4.05, 8.90) | (-0.44, 0.17)  | 0.379  | (0.05, 0.13) | (0.06, 0.12) | (-0.43, 0.17)      | 0.389  |
| Western Sub-Saharan Africa   | — | — | — | — | — | — | — | — | — | 2.11 (1.09, 3.47)  | 2.06 (1.33, 2.88) | (-0.27, 0.14)  | 0.529  | (0.02, 0.05) | (0.02, 0.04) | (-0.26, 0.14)      | 0.540  |
| Southeast Asia               | — | — | — | — | — | — | — | — | — | 4.25 (2.41, 6.44)  | 5.99 (4.30, 8.36) | (1.01, 1.54)   | <0.001 | (0.03, 0.09) | (0.06, 0.12) | 1.28 (1.01, 1.54)  | <0.001 |
| Eastern Sub-Saharan Africa   | — | — | — | — | — | — | — | — | — | 7.91 (3.53, 14.63) | 5.81 (3.52, 8.81) | (-1.13, -0.97) | <0.001 | (0.05, 0.20) | (0.05, 0.12) | (-1.13, -0.97)     | <0.001 |
| Central Latin America        | — | — | — | — | — | — | — | — | — | 4.54 (4.00, 5.24)  | 3.99 (3.14, 5.11) | (-0.77, 0.09)  | 0.119  | (0.06, 0.07) | (0.04, 0.07) | (-0.77, 0.09)      | 0.122  |
| Tropical Latin America       | — | — | — | — | — | — | — | — | — | 4.97 (4.38, 5.66)  | 8.66 (7.57, 9.98) | (1.46, 2.60)   | <0.001 | (0.06, 0.08) | (0.11, 0.14) | 2.02 (1.46, 2.59)  | <0.001 |
| Central Sub-Saharan Africa   | — | — | — | — | — | — | — | — | — | 6.15 (2.53, 12.57) | 4.23 (2.12, 7.38) | (-1.47, -1.19) | <0.001 | (0.04, 0.18) | (0.03, 0.10) | (-1.46, -1.19)     | <0.001 |
| Western Europe               | — | — | — | — | — | — | — | — | — | 7.75 (6.82, 8.74)  | 3.47 (2.97, 4.03) | (-3.34, -2.13) | <0.001 | (0.10, 0.12) | (0.04, 0.06) | (-3.33, -2.13)     | <0.001 |
| High-income North America    | — | — | — | — | — | — | — | — | — | 7.33 (6.53, 8.16)  | 3.44 (3.05, 3.98) | (-3.22, -1.99) | <0.001 | (0.09, 0.11) | (0.04, 0.06) | (-3.21, -1.98)     | <0.001 |
| Central Asia                 | — | — | — | — | — | — | — | — | — | 1.62 (1.24, 2.01)  | 3.19 (2.48, 4.09) | (1.80, 2.98)   | <0.001 | (0.02, 0.03) | (0.03, 0.06) | 2.39 (1.80, 2.98)  | <0.001 |
| Eastern Europe               | — | — | — | — | — | — | — | — | — | 6.98 (5.89, 8.07)  | 6.99 (5.63, 8.35) | 0.13           | 0.869  | 0.10         | 0.10         | 0.14 (-1.44, 1.16) | 0.865  |

|                     |   |   |   |   |   |   |   |   |   |             |             |         |        |        |        |         |        |
|---------------------|---|---|---|---|---|---|---|---|---|-------------|-------------|---------|--------|--------|--------|---------|--------|
|                     |   |   |   |   |   |   |   |   |   | 7.78)       | 8.74)       | (-1.44, | (0.08, | (0.08, | 1.74)  |         |        |
|                     |   |   |   |   |   |   |   |   |   |             |             | 1.73)   | 0.11)  | 0.12)  |        |         |        |
| Southern            |   |   |   |   |   |   |   |   |   | 3.47 (2.57, | 3.14 (2.08, | -0.19   | 0.05   | 0.04   | -0.19  |         |        |
| Sub-Saharan Africa  | — | — | — | — | — | — | — | — | — | 4.63)       | 4.73)       | (-1.20, | 0.718  | (0.04, | (0.03, | (-1.20, | 0.716  |
|                     |   |   |   |   |   |   |   |   |   |             |             | 0.83)   | 0.06)  | 0.07)  | 0.83)  |         |        |
| High-income Asia    |   |   |   |   |   |   |   |   |   | 3.70 (2.85, | 2.52 (1.95, | -1.29   | 0.05   | 0.04   | -1.28  |         |        |
| Pacific             | — | — | — | — | — | — | — | — | — | 4.62)       | 2.98)       | (-1.60, | <0.001 | (0.04, | (0.03, | (-1.59, | <0.001 |
|                     |   |   |   |   |   |   |   |   |   |             |             | -0.98)  | 0.06)  | 0.04)  | -0.97) |         |        |
| Central Europe      |   |   |   |   |   |   |   |   |   | 7.74 (6.70, | 7.69 (6.28, | -0.09   | 0.11   | 0.11   | -0.09  |         |        |
|                     |   |   |   |   |   |   |   |   |   | 8.70)       | 9.41)       | (-0.59, | 0.717  | (0.09, | (0.09, | (-0.59, | 0.721  |
|                     |   |   |   |   |   |   |   |   |   |             |             | 0.41)   | 0.12)  | 0.13)  | 0.41)  |         |        |
| Andean Latin        |   |   |   |   |   |   |   |   |   | 4.45 (2.67, | 3.70 (2.40, | -0.58   | 0.06   | 0.05   | -0.57  |         |        |
| America             | — | — | — | — | — | — | — | — | — | 7.08)       | 5.54)       | (-1.00, | 0.007  | (0.04, | (0.03, | (-0.99, | 0.008  |
|                     |   |   |   |   |   |   |   |   |   |             |             | -0.16)  | 0.10)  | 0.08)  | -0.15) |         |        |
| Caribbean           |   |   |   |   |   |   |   |   |   | 5.59 (4.21, | 5.09 (3.43, | -0.31   | 0.08   | 0.07   | -0.30  |         |        |
|                     |   |   |   |   |   |   |   |   |   | 7.49)       | 7.69)       | (-0.53, | 0.006  | (0.06, | (0.05, | (-0.52, | 0.007  |
|                     |   |   |   |   |   |   |   |   |   |             |             | -0.09)  | 0.10)  | 0.11)  | -0.08) |         |        |
| Southern Latin      |   |   |   |   |   |   |   |   |   | 6.46 (5.05, | 6.00 (4.76, | -0.40   | 0.09   | 0.08   | -0.40  |         |        |
| America             | — | — | — | — | — | — | — | — | — | 8.54)       | 7.64)       | (-0.91, | 0.131  | (0.07, | (0.07, | (-0.91, | 0.133  |
|                     |   |   |   |   |   |   |   |   |   |             |             | 0.12)   | 0.12)  | 0.11)  | 0.12)  |         |        |
| Oceania             |   |   |   |   |   |   |   |   |   | 5.41 (2.55, | 5.43 (2.45, | -0.07   | 0.08   | 0.08   | -0.07  |         |        |
|                     |   |   |   |   |   |   |   |   |   | 10.74)      | 11.38)      | (-0.45, | 0.698  | (0.04, | (0.03, | (-0.45, | 0.700  |
|                     |   |   |   |   |   |   |   |   |   |             |             | 0.30)   | 0.15)  | 0.16)  | 0.30)  |         |        |
| Australasia         |   |   |   |   |   |   |   |   |   | 4.54 (3.59, | 1.37 (1.02, | -4.08   |        | 0.06   | 0.02   | -4.08   |        |
|                     |   |   |   |   |   |   |   |   |   | 5.62)       | 1.82)       | (-5.38, | <0.001 | (0.05, | (0.01, | (-5.37, | <0.001 |
|                     |   |   |   |   |   |   |   |   |   |             |             | -2.76)  | 0.08)  | 0.03)  | -2.76) |         |        |
| <b>20-24 years</b>  |   |   |   |   |   |   |   |   |   |             |             |         |        |        |        |         |        |
| <b>Women</b>        |   |   |   |   |   |   |   |   |   |             |             |         |        |        |        |         |        |
| Global              |   |   |   |   |   |   |   |   |   | 2.62 (2.22, | 2.47 (2.16, | -0.20   |        | 0.04   | 0.04   | -0.20   |        |
|                     |   |   |   |   |   |   |   |   |   | 4.51)       | 3.07)       | (-0.32, | 0.001  | (0.03, | (0.03, | (-0.32, | 0.001  |
|                     |   |   |   |   |   |   |   |   |   |             |             | -0.09)  |        | 0.07)  | 0.05)  | -0.09)  |        |
| <b>SDI category</b> |   |   |   |   |   |   |   |   |   |             |             |         |        |        |        |         |        |
| High                | — | — | — | — | — | — | — | — | — | 3.12 (2.86, | 2.51 (2.26, | -0.75   | <0.001 | 0.05   | 0.04   | -0.74   | <0.001 |

|                              |   |   |   |   |   |   |   |   |             |             |         |        |        |              |         |        |
|------------------------------|---|---|---|---|---|---|---|---|-------------|-------------|---------|--------|--------|--------------|---------|--------|
|                              |   |   |   |   |   |   |   |   | 3.45)       | 2.78)       | (-0.89, | (0.04, | (0.03, | (-0.88,      |         |        |
|                              |   |   |   |   |   |   |   |   |             |             | -0.61)  | 0.05)  | 0.04)  | -0.61)       |         |        |
|                              |   |   |   |   |   |   |   |   |             |             | 0.11    | 0.04   | 0.04   | 0.11 (-0.20, |         |        |
| High-middle                  | — | — | — | — | — | — | — | — | 2.91 (2.49, | 2.98 (2.58, | (-0.20, | 0.480  | (0.04, | (0.04,       | 0.43)   | 0.478  |
|                              |   |   |   |   |   |   |   |   | 3.91)       | 3.41)       | 0.42)   |        | 0.06)  | 0.05)        |         |        |
|                              |   |   |   |   |   |   |   |   |             |             | -0.15   | 0.04   | 0.04   | -0.15        |         |        |
| Middle                       | — | — | — | — | — | — | — | — | 2.75 (2.23, | 2.64 (2.23, | (-0.41, | 0.256  | (0.03, | (0.03,       | (-0.41, | 0.254  |
|                              |   |   |   |   |   |   |   |   | 4.76)       | 3.22)       | 0.11)   |        | 0.07)  | 0.05)        | 0.11)   |        |
|                              |   |   |   |   |   |   |   |   |             |             | 0.39    | 0.03   | 0.03   | 0.39 (0.07,  |         |        |
| Low-middle                   | — | — | — | — | — | — | — | — | 2.03 (1.43, | 2.27 (1.77, | (0.07,  | 0.016  | (0.02, | (0.03,       | 0.70)   | 0.016  |
|                              |   |   |   |   |   |   |   |   | 5.27)       | 3.66)       | 0.70)   |        | 0.08)  | 0.05)        |         |        |
|                              |   |   |   |   |   |   |   |   |             |             | -0.18   | 0.03   | 0.03   | -0.18        |         |        |
| Low                          | — | — | — | — | — | — | — | — | 2.15 (1.10, | 2.06 (1.42, | (-0.29, | 0.003  | (0.02, | (0.02,       | (-0.29, | 0.002  |
|                              |   |   |   |   |   |   |   |   | 5.36)       | 3.22)       | -0.06)  |        | 0.08)  | 0.05)        | -0.06)  |        |
| <b>21 GBD region</b>         |   |   |   |   |   |   |   |   |             |             |         |        |        |              |         |        |
|                              |   |   |   |   |   |   |   |   |             |             | 0.70    | 0.02   | 0.03   | 0.70 (0.51,  |         |        |
| South Asia                   | — | — | — | — | — | — | — | — | 1.46 (0.88, | 1.78 (1.24, | (0.51,  | <0.001 | (0.01, | (0.02,       | 0.90)   | <0.001 |
|                              |   |   |   |   |   |   |   |   | 5.05)       | 3.39)       | 0.90)   |        | 0.08)  | 0.05)        |         |        |
|                              |   |   |   |   |   |   |   |   |             |             | -0.33   | 0.04   | 0.04   | -0.33        |         |        |
| East Asia                    | — | — | — | — | — | — | — | — | 2.80 (1.98, | 2.43 (1.85, | (-0.80, | 0.164  | (0.03, | (0.03,       | (-0.80, | 0.163  |
|                              |   |   |   |   |   |   |   |   | 5.16)       | 3.09)       | 0.14)   |        | 0.08)  | 0.05)        | 0.13)   |        |
|                              |   |   |   |   |   |   |   |   |             |             | -0.05   | 0.04   | 0.04   | -0.05        |         |        |
| North Africa and Middle East | — | — | — | — | — | — | — | — | 2.68 (1.93, | 2.64 (1.93, | (-0.12, | 0.221  | (0.03, | (0.03,       | (-0.12, | 0.209  |
|                              |   |   |   |   |   |   |   |   | 4.55)       | 3.72)       | 0.03)   |        | 0.07)  | 0.06)        | 0.03)   |        |
|                              |   |   |   |   |   |   |   |   |             |             | -0.53   | 0.02   | 0.02   | -0.53        |         |        |
| Western Sub-Saharan Africa   | — | — | — | — | — | — | — | — | 1.58 (1.02, | 1.37 (0.93, | (-0.68, | <0.001 | (0.02, | (0.01,       | (-0.68, | <0.001 |
|                              |   |   |   |   |   |   |   |   | 2.55)       | 2.00)       | -0.37)  |        | 0.04)  | 0.03)        | -0.37)  |        |
|                              |   |   |   |   |   |   |   |   |             |             | 1.25    | 0.03   | 0.04   | 1.25 (1.06,  |         |        |
| Southeast Asia               | — | — | — | — | — | — | — | — | 1.85 (1.33, | 2.64 (2.02, | (1.06,  | <0.001 | (0.02, | (0.03,       | 1.45)   | <0.001 |
|                              |   |   |   |   |   |   |   |   | 3.84)       | 3.55)       | 1.45)   |        | 0.06)  | 0.05)        |         |        |
|                              |   |   |   |   |   |   |   |   |             |             | -0.66   | 0.06   | 0.05   | -0.66        |         |        |
| Eastern Sub-Saharan Africa   | — | — | — | — | — | — | — | — | 3.79 (1.75, | 3.14 (2.01, | (-0.91, | <0.001 | (0.03, | (0.03,       | (-0.91, | <0.001 |
|                              |   |   |   |   |   |   |   |   | 8.21)       | 4.38)       | -0.40)  |        | 0.12)  | 0.07)        | -0.41)  |        |

|                             |   |   |   |   |   |   |   |   |                     |                   |                      |        |                   |                   |                      |        |
|-----------------------------|---|---|---|---|---|---|---|---|---------------------|-------------------|----------------------|--------|-------------------|-------------------|----------------------|--------|
| Central Latin America       | — | — | — | — | — | — | — | — | 3.25 (2.81, 3.75)   | 3.14 (2.40, 3.98) | -0.08 (-0.73, 0.57)  | 0.801  | 0.05 (0.04, 0.06) | 0.05 (0.04, 0.06) | -0.08 (-0.73, 0.57)  | 0.802  |
| Tropical Latin America      | — | — | — | — | — | — | — | — | 3.41 (2.99, 3.90)   | 5.11 (4.42, 5.96) | 1.43 (1.01, 1.86)    | <0.001 | 0.05 (0.04, 0.06) | 0.08 (0.07, 0.09) | 1.43 (1.01, 1.85)    | <0.001 |
| Central Sub-Saharan Africa  | — | — | — | — | — | — | — | — | 2.81 (1.28, 6.11)   | 2.50 (1.34, 4.28) | -0.42 (-0.56, -0.29) | <0.001 | 0.04 (0.02, 0.09) | 0.04 (0.02, 0.06) | -0.43 (-0.56, -0.29) | <0.001 |
| Western Europe              | — | — | — | — | — | — | — | — | 3.41 (3.00, 3.91)   | 2.63 (2.25, 3.07) | -0.91 (-1.12, -0.69) | <0.001 | 0.05 (0.05, 0.06) | 0.04 (0.03, 0.05) | -0.91 (-1.12, -0.69) | <0.001 |
| High-income North America   | — | — | — | — | — | — | — | — | 3.80 (3.44, 4.18)   | 2.90 (2.61, 3.24) | -0.94 (-1.30, -0.58) | <0.001 | 0.06 (0.05, 0.06) | 0.04 (0.04, 0.05) | -0.94 (-1.29, -0.57) | <0.001 |
| Central Asia                | — | — | — | — | — | — | — | — | 1.23 (0.99, 1.60)   | 1.70 (1.32, 2.19) | 1.14 (0.88, 1.40)    | <0.001 | 0.02 (0.01, 0.02) | 0.03 (0.02, 0.03) | 1.12 (0.86, 1.38)    | <0.001 |
| Eastern Europe              | — | — | — | — | — | — | — | — | 2.96 (2.54, 3.32)   | 4.31 (3.28, 5.55) | 1.31 (0.17, 2.48)    | 0.024  | 0.04 (0.04, 0.05) | 0.06 (0.05, 0.08) | 1.32 (0.17, 2.48)    | 0.024  |
| Southern Sub-Saharan Africa | — | — | — | — | — | — | — | — | 10.96 (8.35, 13.73) | 4.77 (2.88, 7.15) | -2.82 (-3.34, -2.30) | <0.001 | 0.17 (0.13, 0.21) | 0.07 (0.04, 0.11) | -2.83 (-3.35, -2.30) | <0.001 |
| High-income Asia Pacific    | — | — | — | — | — | — | — | — | 1.48 (1.23, 1.86)   | 1.98 (1.57, 2.27) | 1.02 (0.69, 1.36)    | <0.001 | 0.02 (0.02, 0.03) | 0.03 (0.02, 0.03) | 1.02 (0.69, 1.36)    | <0.001 |
| Central Europe              | — | — | — | — | — | — | — | — | 4.32 (3.67, 5.14)   | 4.96 (3.87, 6.16) | 0.44 (0.20, 0.68)    | <0.001 | 0.06 (0.06, 0.08) | 0.07 (0.06, 0.09) | 0.44 (0.20, 0.68)    | <0.001 |
| Andean Latin America        | — | — | — | — | — | — | — | — | 3.99 (2.62, 6.08)   | 3.60 (2.35, 5.17) | -0.36 (-0.90, 0.18)  | 0.193  | 0.06 (0.04, 0.09) | 0.05 (0.04, 0.08) | -0.36 (-0.90, 0.18)  | 0.191  |

|                        |   |   |   |   |   |   |   |   |                    |                   |                      |        |                   |                   |                      |        |
|------------------------|---|---|---|---|---|---|---|---|--------------------|-------------------|----------------------|--------|-------------------|-------------------|----------------------|--------|
| Caribbean              | — | — | — | — | — | — | — | — | 2.11 (1.60, 3.72)  | 2.15 (1.39, 3.88) | 0.04 (-0.11, 0.20)   | 0.576  | 0.03 (0.02, 0.06) | 0.03 (0.02, 0.06) | 0.05 (-0.11, 0.20)   | 0.557  |
| Southern Latin America | — | — | — | — | — | — | — | — | 3.74 (2.82, 4.89)  | 3.54 (2.69, 4.65) | -0.20 (-0.48, 0.09)  | 0.179  | 0.06 (0.04, 0.07) | 0.05 (0.04, 0.07) | -0.20 (-0.48, 0.09)  | 0.175  |
| Oceania                | — | — | — | — | — | — | — | — | 0.60 (0.36, 1.03)  | 0.61 (0.36, 1.04) | -0.03 (-0.28, 0.23)  | 0.830  | 0.01 (0.01, 0.02) | 0.01 (0.01, 0.02) | -0.03 (-0.28, 0.23)  | 0.833  |
| Australasia            | — | — | — | — | — | — | — | — | 3.87 (2.71, 5.28)  | 1.85 (1.26, 2.70) | -2.52 (-3.00, -2.05) | <0.001 | 0.06 (0.04, 0.08) | 0.03 (0.02, 0.04) | -2.52 (-3.00, -2.04) | <0.001 |
| <b>Men</b>             |   |   |   |   |   |   |   |   |                    |                   |                      |        |                   |                   |                      |        |
| Global                 | — | — | — | — | — | — | — | — | 6.07 (4.88, 7.64)  | 5.84 (5.14, 6.61) | -0.13 (-0.30, 0.03)  | 0.114  | 0.09 (0.07, 0.11) | 0.09 (0.08, 0.10) | -0.13 (-0.30, 0.04)  | 0.122  |
| <b>SDI category</b>    |   |   |   |   |   |   |   |   |                    |                   |                      |        |                   |                   |                      |        |
| High                   | — | — | — | — | — | — | — | — | 9.10 (8.25, 9.93)  | 5.81 (5.26, 6.49) | -1.56 (-1.71, -1.40) | <0.001 | 0.14 (0.12, 0.15) | 0.09 (0.08, 0.10) | -1.55 (-1.71, -1.40) | <0.001 |
| High-middle            | — | — | — | — | — | — | — | — | 8.26 (6.91, 10.10) | 8.20 (7.05, 9.64) | -0.11 (-0.72, 0.52)  | 0.735  | 0.12 (0.10, 0.15) | 0.12 (0.11, 0.14) | -0.10 (-0.72, 0.52)  | 0.740  |
| Middle                 | — | — | — | — | — | — | — | — | 4.90 (3.79, 6.30)  | 5.71 (4.83, 6.89) | 0.58 (0.39, 0.76)    | <0.001 | 0.07 (0.06, 0.09) | 0.09 (0.07, 0.10) | 0.58 (0.40, 0.76)    | <0.001 |
| Low-middle             | — | — | — | — | — | — | — | — | 4.08 (2.48, 6.52)  | 4.81 (3.79, 5.96) | 0.64 (0.20, 1.07)    | 0.004  | 0.06 (0.04, 0.10) | 0.07 (0.06, 0.09) | 0.64 (0.20, 1.07)    | 0.004  |
| Low                    | — | — | — | — | — | — | — | — | 5.73 (2.78, 10.14) | 5.53 (3.42, 8.14) | -0.14 (-0.34, 0.06)  | 0.176  | 0.09 (0.04, 0.15) | 0.08 (0.05, 0.12) | -0.14 (-0.34, 0.06)  | 0.181  |
| <b>21 GBD region</b>   |   |   |   |   |   |   |   |   |                    |                   |                      |        |                   |                   |                      |        |

|                              |   |   |   |   |   |   |   |   |                     |                      |                      |        |                   |                   |                      |        |
|------------------------------|---|---|---|---|---|---|---|---|---------------------|----------------------|----------------------|--------|-------------------|-------------------|----------------------|--------|
| South Asia                   | — | — | — | — | — | — | — | — | 3.21 (1.62, 5.65)   | 3.74 (2.67, 4.92)    | 0.65 (-0.15, 1.46)   | 0.114  | 0.05 (0.02, 0.08) | 0.06 (0.04, 0.07) | 0.65 (-0.15, 1.46)   | 0.111  |
| East Asia                    | — | — | — | — | — | — | — | — | 5.14 (3.35, 7.46)   | 4.88 (3.75, 6.23)    | -0.12 (-0.60, 0.36)  | 0.625  | 0.08 (0.05, 0.11) | 0.07 (0.06, 0.09) | -0.12 (-0.59, 0.37)  | 0.639  |
| North Africa and Middle East | — | — | — | — | — | — | — | — | 6.55 (4.02, 10.13)  | 5.72 (4.13, 8.17)    | -0.43 (-0.69, -0.17) | 0.001  | 0.10 (0.06, 0.15) | 0.09 (0.06, 0.12) | -0.43 (-0.69, -0.17) | 0.001  |
| Western Sub-Saharan Africa   | — | — | — | — | — | — | — | — | 4.47 (2.36, 7.04)   | 4.49 (2.98, 6.33)    | 0.04 (-0.16, 0.24)   | 0.702  | 0.07 (0.04, 0.11) | 0.07 (0.04, 0.10) | 0.04 (-0.16, 0.24)   | 0.693  |
| Southeast Asia               | — | — | — | — | — | — | — | — | 4.41 (2.59, 6.78)   | 6.26 (4.50, 8.38)    | 1.29 (0.95, 1.62)    | <0.001 | 0.07 (0.04, 0.10) | 0.09 (0.07, 0.13) | 1.29 (0.95, 1.62)    | <0.001 |
| Eastern Sub-Saharan Africa   | — | — | — | — | — | — | — | — | 9.76 (4.72, 17.39)  | 8.06 (4.80, 12.15)   | -0.65 (-0.83, -0.48) | <0.001 | 0.15 (0.07, 0.26) | 0.12 (0.07, 0.18) | -0.65 (-0.82, -0.48) | <0.001 |
| Central Latin America        | — | — | — | — | — | — | — | — | 6.33 (5.44, 7.34)   | 6.22 (4.97, 7.76)    | -0.02 (-0.29, 0.26)  | 0.906  | 0.10 (0.08, 0.11) | 0.09 (0.07, 0.12) | -0.02 (-0.29, 0.26)  | 0.910  |
| Tropical Latin America       | — | — | — | — | — | — | — | — | 8.33 (7.26, 9.58)   | 14.03 (12.17, 16.21) | 1.83 (1.31, 2.35)    | <0.001 | 0.13 (0.11, 0.14) | 0.21 (0.18, 0.24) | 1.83 (1.31, 2.35)    | <0.001 |
| Central Sub-Saharan Africa   | — | — | — | — | — | — | — | — | 8.26 (3.67, 17.14)  | 6.80 (3.64, 12.15)   | -0.70 (-0.88, -0.51) | <0.001 | 0.12 (0.06, 0.26) | 0.10 (0.05, 0.18) | -0.70 (-0.88, -0.51) | <0.001 |
| Western Europe               | — | — | — | — | — | — | — | — | 10.99 (9.55, 12.39) | 5.87 (5.17, 6.84)    | -2.18 (-2.70, -1.66) | <0.001 | 0.17 (0.14, 0.19) | 0.09 (0.08, 0.10) | -2.18 (-2.70, -1.66) | <0.001 |
| High-income North America    | — | — | — | — | — | — | — | — | 10.67 (9.55, 11.77) | 6.99 (6.05, 8.11)    | -1.51 (-2.05, -0.97) | <0.001 | 0.16 (0.14, 0.18) | 0.11 (0.09, 0.12) | -1.51 (-2.04, -0.97) | <0.001 |

|                             |   |   |   |   |   |   |   |   |                      |                      |                      |        |                   |                   |                      |        |
|-----------------------------|---|---|---|---|---|---|---|---|----------------------|----------------------|----------------------|--------|-------------------|-------------------|----------------------|--------|
| Central Asia                | — | — | — | — | — | — | — | — | 4.81 (3.71, 6.02)    | 7.42 (5.88, 9.18)    | 1.43 (0.40, 2.46)    | 0.006  | 0.07 (0.06, 0.09) | 0.11 (0.09, 0.14) | 1.43 (0.40, 2.47)    | 0.006  |
| Eastern Europe              | — | — | — | — | — | — | — | — | 11.54 (10.10, 13.35) | 18.17 (14.56, 23.83) | 1.55 (1.11, 1.98)    | <0.001 | 0.17 (0.15, 0.20) | 0.27 (0.22, 0.36) | 1.55 (1.12, 1.99)    | <0.001 |
| Southern Sub-Saharan Africa | — | — | — | — | — | — | — | — | 10.41 (7.60, 14.63)  | 10.16 (7.51, 13.76)  | -0.13 (-1.13, 0.88)  | 0.800  | 0.16 (0.11, 0.22) | 0.15 (0.11, 0.21) | -0.13 (-1.14, 0.88)  | 0.796  |
| High-income Asia Pacific    | — | — | — | — | — | — | — | — | 5.11 (4.12, 6.49)    | 4.64 (3.74, 5.51)    | -0.27 (-0.72, 0.18)  | 0.233  | 0.08 (0.06, 0.10) | 0.07 (0.06, 0.08) | -0.27 (-0.72, 0.18)  | 0.242  |
| Central Europe              | — | — | — | — | — | — | — | — | 11.26 (9.75, 12.89)  | 11.45 (9.49, 13.75)  | 0.04 (-0.50, 0.57)   | 0.892  | 0.17 (0.15, 0.19) | 0.17 (0.14, 0.21) | 0.04 (-0.49, 0.57)   | 0.890  |
| Andean Latin America        | — | — | — | — | — | — | — | — | 7.05 (4.29, 10.93)   | 6.17 (3.91, 9.55)    | -0.24 (-0.78, 0.30)  | 0.385  | 0.11 (0.06, 0.16) | 0.09 (0.06, 0.14) | -0.24 (-0.77, 0.30)  | 0.389  |
| Caribbean                   | — | — | — | — | — | — | — | — | 4.88 (3.60, 6.45)    | 4.11 (2.80, 5.94)    | -0.62 (-0.87, -0.38) | <0.001 | 0.07 (0.05, 0.10) | 0.06 (0.04, 0.09) | -0.62 (-0.87, -0.37) | <0.001 |
| Southern Latin America      | — | — | — | — | — | — | — | — | 9.00 (6.61, 12.22)   | 7.95 (5.96, 10.55)   | -0.32 (-0.98, 0.35)  | 0.351  | 0.14 (0.10, 0.18) | 0.12 (0.09, 0.16) | -0.32 (-0.97, 0.35)  | 0.351  |
| Oceania                     | — | — | — | — | — | — | — | — | 7.03 (3.33, 14.38)   | 6.54 (2.97, 13.11)   | -0.34 (-0.71, 0.04)  | 0.083  | 0.11 (0.05, 0.22) | 0.10 (0.04, 0.20) | -0.33 (-0.71, 0.04)  | 0.083  |
| Australasia                 | — | — | — | — | — | — | — | — | 8.55 (6.36, 11.32)   | 3.09 (2.07, 4.42)    | -3.42 (-3.78, -3.06) | <0.001 | 0.13 (0.10, 0.17) | 0.05 (0.03, 0.07) | -3.42 (-3.77, -3.06) | <0.001 |
| <b>25-29 years Women</b>    |   |   |   |   |   |   |   |   |                      |                      |                      |        |                   |                   |                      |        |
| Global                      | — | — | — | — | — | — | — | — | 3.82 (3.34, 4.30)    | 3.69 (3.25, 4.13)    | -0.08 (-0.13, -0.03) | 0.580  | 0.06 (0.05, 0.07) | 0.06 (0.05, 0.07) | -0.08 (-0.13, -0.03) | 0.583  |

|                              |   |   |   |   |   |   |   |   |   | 6.28)       | 4.47)       | (-0.39, | (0.05, | (0.05, | (-0.39, |              |        |
|------------------------------|---|---|---|---|---|---|---|---|---|-------------|-------------|---------|--------|--------|---------|--------------|--------|
|                              |   |   |   |   |   |   |   |   |   |             |             | 0.22)   | 0.10)  | 0.07)  | 0.22)   |              |        |
| <b>SDI category</b>          |   |   |   |   |   |   |   |   |   |             |             |         |        |        |         |              |        |
| High                         | — | — | — | — | — | — | — | — | — | 5.38 (4.99, | 4.10 (3.75, | -0.91   |        | 0.09   | 0.07    | -0.91        |        |
|                              |   |   |   |   |   |   |   |   |   | 5.81)       | 4.52)       | (-1.06, | <0.001 | (0.08, | (0.06,  | (-1.06,      | <0.001 |
|                              |   |   |   |   |   |   |   |   |   |             |             | -0.76)  |        | 0.09)  | 0.07)   | -0.76)       |        |
| High-middle                  | — | — | — | — | — | — | — | — | — | 4.27 (3.75, | 4.40 (3.81, | 0.14    |        | 0.07   | 0.07    | 0.14 (-0.23, |        |
|                              |   |   |   |   |   |   |   |   |   | 5.46)       | 5.07)       | (-0.23, | 0.466  | (0.06, | (0.06,  | 0.50)        | 0.464  |
|                              |   |   |   |   |   |   |   |   |   |             |             | 0.50)   |        | 0.09)  | 0.08)   | 0.50)        |        |
| Middle                       | — | — | — | — | — | — | — | — | — | 3.39 (2.79, | 3.47 (2.92, | 0.14    |        | 0.06   | 0.06    | 0.14 (-0.26, |        |
|                              |   |   |   |   |   |   |   |   |   | 5.94)       | 4.16)       | (-0.25, | 0.480  | (0.05, | (0.05,  | 0.54)        | 0.483  |
|                              |   |   |   |   |   |   |   |   |   |             |             | 0.54)   |        | 0.10)  | 0.07)   | 0.54)        |        |
| Low-middle                   | — | — | — | — | — | — | — | — | — | 2.87 (2.07, | 3.47 (2.76, | 0.70    |        | 0.05   | 0.06    | 0.70 (0.34,  |        |
|                              |   |   |   |   |   |   |   |   |   | 7.21)       | 5.30)       | (0.34,  | <0.001 | (0.03, | (0.04,  | 1.07)        | <0.001 |
|                              |   |   |   |   |   |   |   |   |   |             |             | 1.07)   |        | 0.12)  | 0.09)   | 1.07)        |        |
| Low                          | — | — | — | — | — | — | — | — | — | 3.82 (2.06, | 3.38 (2.39, | -0.42   |        | 0.06   | 0.05    | -0.42        |        |
|                              |   |   |   |   |   |   |   |   |   | 9.51)       | 5.42)       | (-0.55, | <0.001 | (0.03, | (0.04,  | (-0.55,      | <0.001 |
|                              |   |   |   |   |   |   |   |   |   |             |             | -0.29)  |        | 0.15)  | 0.09)   | -0.28)       |        |
| <b>21 GBD region</b>         |   |   |   |   |   |   |   |   |   |             |             |         |        |        |         |              |        |
| South Asia                   | — | — | — | — | — | — | — | — | — | 2.20 (1.37, | 2.90 (2.04, | 0.98    |        | 0.04   | 0.05    | 0.98 (0.63,  |        |
|                              |   |   |   |   |   |   |   |   |   | 6.53)       | 4.83)       | (0.63,  | <0.001 | (0.02, | (0.03,  | 1.33)        | <0.001 |
|                              |   |   |   |   |   |   |   |   |   |             |             | 1.33)   |        | 0.11)  | 0.08)   | 1.33)        |        |
| East Asia                    | — | — | — | — | — | — | — | — | — | 2.90 (1.99, | 2.59 (1.94, | -0.24   |        | 0.05   | 0.04    | -0.24        |        |
|                              |   |   |   |   |   |   |   |   |   | 6.02)       | 3.38)       | (-1.25, | 0.639  | (0.03, | (0.03,  | (-1.25,      | 0.639  |
|                              |   |   |   |   |   |   |   |   |   |             |             | 0.77)   |        | 0.10)  | 0.05)   | 0.78)        |        |
| North Africa and Middle East | — | — | — | — | — | — | — | — | — | 3.98 (2.85, | 4.12 (3.02, | 0.12    |        | 0.06   | 0.07    | 0.12 (0.02,  |        |
|                              |   |   |   |   |   |   |   |   |   | 7.71)       | 5.84)       | (0.02,  | 0.016  | (0.05, | (0.05,  | 0.21)        | 0.014  |
|                              |   |   |   |   |   |   |   |   |   |             |             | 0.21)   |        | 0.13)  | 0.09)   | 0.21)        |        |
| Western Sub-Saharan Africa   | — | — | — | — | — | — | — | — | — | 2.75 (1.81, | 2.26 (1.52, | -0.68   |        | 0.04   | 0.04    | -0.68        |        |
|                              |   |   |   |   |   |   |   |   |   | 4.90)       | 3.32)       | (-0.83, | <0.001 | (0.03, | (0.02,  | (-0.83,      | <0.001 |
|                              |   |   |   |   |   |   |   |   |   |             |             | -0.53)  |        | 0.08)  | 0.05)   | -0.53)       |        |
| Southeast Asia               | — | — | — | — | — | — | — | — | — | 2.31 (1.67, | 3.14 (2.40, | 1.09    |        | 0.04   | 0.05    | 1.09 (0.90,  |        |
|                              |   |   |   |   |   |   |   |   |   | 4.74)       | 4.17)       | (0.90,  | <0.001 | (0.03, | (0.04,  | 1.29)        | <0.001 |







|                              |   |   |   |   |   |   |   |   |                      |                      |                      |        |                   |                   |                      |        |
|------------------------------|---|---|---|---|---|---|---|---|----------------------|----------------------|----------------------|--------|-------------------|-------------------|----------------------|--------|
| Low                          | — | — | — | — | — | — | — | — | 10.91 (5.54, 18.47)  | 10.67 (6.95, 15.27)  | -0.09 (-0.32, 0.15)  | 0.482  | 0.18 (0.09, 0.30) | 0.17 (0.11, 0.25) | -0.09 (-0.32, 0.15)  | 0.481  |
| <b>21 GBD region</b>         |   |   |   |   |   |   |   |   |                      |                      |                      |        |                   |                   |                      |        |
| South Asia                   | — | — | — | — | — | — | — | — | 5.75 (2.98, 9.75)    | 7.29 (5.22, 9.51)    | 0.82 (0.12, 1.53)    | 0.022  | 0.09 (0.05, 0.16) | 0.12 (0.08, 0.15) | 0.82 (0.12, 1.53)    | 0.021  |
| East Asia                    | — | — | — | — | — | — | — | — | 7.89 (5.38, 11.13)   | 8.53 (6.86, 10.63)   | 0.25 (0.01, 0.49)    | 0.039  | 0.13 (0.09, 0.18) | 0.14 (0.11, 0.17) | 0.25 (0.01, 0.49)    | 0.039  |
| North Africa and Middle East | — | — | — | — | — | — | — | — | 12.00 (7.35, 18.44)  | 9.31 (7.00, 12.17)   | -0.94 (-1.26, -0.62) | <0.001 | 0.19 (0.12, 0.30) | 0.15 (0.11, 0.20) | -0.94 (-1.26, -0.62) | <0.001 |
| Western Sub-Saharan Africa   | — | — | — | — | — | — | — | — | 13.26 (7.44, 20.04)  | 13.14 (9.29, 17.67)  | -0.01 (-0.20, 0.18)  | 0.918  | 0.22 (0.12, 0.33) | 0.21 (0.15, 0.29) | -0.01 (-0.20, 0.18)  | 0.921  |
| Southeast Asia               | — | — | — | — | — | — | — | — | 6.84 (4.20, 10.00)   | 8.84 (6.43, 11.36)   | 0.85 (0.31, 1.40)    | 0.002  | 0.11 (0.07, 0.16) | 0.14 (0.10, 0.18) | 0.85 (0.31, 1.40)    | 0.002  |
| Eastern Sub-Saharan Africa   | — | — | — | — | — | — | — | — | 16.48 (8.72, 28.92)  | 13.14 (8.11, 19.27)  | -0.77 (-0.97, -0.57) | <0.001 | 0.27 (0.14, 0.47) | 0.21 (0.13, 0.31) | -0.77 (-0.97, -0.57) | <0.001 |
| Central Latin America        | — | — | — | — | — | — | — | — | 9.24 (8.02, 10.69)   | 9.40 (7.63, 11.43)   | 0.17 (-0.07, 0.41)   | 0.167  | 0.15 (0.13, 0.17) | 0.15 (0.12, 0.19) | 0.17 (-0.07, 0.41)   | 0.168  |
| Tropical Latin America       | — | — | — | — | — | — | — | — | 14.96 (13.07, 17.33) | 21.28 (18.63, 24.59) | 1.31 (0.98, 1.63)    | <0.001 | 0.24 (0.21, 0.28) | 0.34 (0.30, 0.40) | 1.30 (0.98, 1.62)    | <0.001 |
| Central Sub-Saharan Africa   | — | — | — | — | — | — | — | — | 12.69 (5.77, 24.71)  | 10.61 (6.09, 17.55)  | -0.65 (-0.98, -0.32) | <0.001 | 0.21 (0.09, 0.40) | 0.17 (0.10, 0.28) | -0.65 (-0.98, -0.32) | <0.001 |
| Western Europe               | — | — | — | — | — | — | — | — | 16.87 (14.78, 18.94) | 10.66 (9.48, 12.05)  | -1.63 (-2.10, -1.16) | <0.001 | 0.27 (0.24, 0.30) | 0.17 (0.15, 0.19) | -1.63 (-2.10, -1.16) | <0.001 |





|                             |   |   |   |   |   |   |   |   |   |               |               |         |        |        |             |              |        |
|-----------------------------|---|---|---|---|---|---|---|---|---|---------------|---------------|---------|--------|--------|-------------|--------------|--------|
| Sub-Saharan Africa          |   |   |   |   |   |   |   |   |   | 9.33)         | 5.09)         | (-1.87, | (0.07, | (0.04, | (-1.87,     |              |        |
|                             |   |   |   |   |   |   |   |   |   |               |               | -1.48)  | 0.16)  | 0.09)  | -1.48)      |              |        |
|                             |   |   |   |   |   |   |   |   |   |               |               | 0.95    | 0.09   | 0.12   | 0.95 (0.90, |              |        |
| Southeast Asia              | — | — | — | — | — | — | — | — | — | 5.29 (3.88,   | 6.93 (5.46,   | (0.89,  | <0.001 | (0.07, | (0.10,      | 1.01)        | <0.001 |
|                             |   |   |   |   |   |   |   |   |   | 10.18)        | 9.23)         | 1.01)   |        | 0.18)  | 0.16)       |              |        |
|                             |   |   |   |   |   |   |   |   |   |               |               | -1.09   |        | 0.17   | 0.12        | -1.08        |        |
| Eastern Sub-Saharan Africa  | — | — | — | — | — | — | — | — | — | 9.47 (4.43,   | 7.02 (4.56,   | (-1.22, | <0.001 | (0.08, | (0.08,      | (-1.22,      | <0.001 |
|                             |   |   |   |   |   |   |   |   |   | 21.12)        | 9.62)         | -0.95)  |        | 0.37)  | 0.17)       | -0.95)       |        |
|                             |   |   |   |   |   |   |   |   |   |               |               | -0.31   |        | 0.09   | 0.08        | -0.31        |        |
| Central Latin America       | — | — | — | — | — | — | — | — | — | 5.35 (4.56,   | 4.74 (3.58,   | (-0.52, | 0.004  | (0.08, | (0.06,      | (-0.52,      | 0.004  |
|                             |   |   |   |   |   |   |   |   |   | 6.18)         | 6.45)         | -0.10)  |        | 0.11)  | 0.11)       | -0.10)       |        |
|                             |   |   |   |   |   |   |   |   |   |               |               | 0.10    |        | 0.25   | 0.25        | 0.10 (-0.45, |        |
| Tropical Latin America      | — | — | — | — | — | — | — | — | — | 14.07 (12.35, | 14.06 (12.19, | (-0.45, | 0.713  | (0.22, | (0.22,      | 0.66)        | 0.711  |
|                             |   |   |   |   |   |   |   |   |   | 16.00)        | 16.30)        | 0.66)   |        | 0.28)  | 0.29)       |              |        |
|                             |   |   |   |   |   |   |   |   |   |               |               | -0.85   |        | 0.13   | 0.10        | -0.85        |        |
| Central Sub-Saharan Africa  | — | — | — | — | — | — | — | — | — | 7.21 (3.50,   | 5.72 (3.09,   | (-1.07, | <0.001 | (0.06, | (0.05,      | (-1.07,      | <0.001 |
|                             |   |   |   |   |   |   |   |   |   | 15.78)        | 10.07)        | -0.64)  |        | 0.28)  | 0.18)       | -0.64)       |        |
|                             |   |   |   |   |   |   |   |   |   |               |               | -0.78   |        | 0.12   | 0.10        | -0.78        |        |
| Western Europe              | — | — | — | — | — | — | — | — | — | 7.00 (6.17,   | 5.62 (4.92,   | (-0.99, | <0.001 | (0.11, | (0.09,      | (-0.99,      | <0.001 |
|                             |   |   |   |   |   |   |   |   |   | 8.03)         | 6.49)         | -0.56)  |        | 0.14)  | 0.11)       | -0.56)       |        |
|                             |   |   |   |   |   |   |   |   |   |               |               | -0.52   |        | 0.15   | 0.13        | -0.52        |        |
| High-income North America   | — | — | — | — | — | — | — | — | — | 8.60 (7.87,   | 7.41 (6.54,   | (-1.02, | 0.044  | (0.14, | (0.12,      | (-1.02,      | 0.043  |
|                             |   |   |   |   |   |   |   |   |   | 9.33)         | 8.81)         | -0.01)  |        | 0.16)  | 0.16)       | -0.02)       |        |
|                             |   |   |   |   |   |   |   |   |   |               |               | 1.03    |        | 0.07   | 0.09        | 1.03 (0.80,  |        |
| Central Asia                | — | — | — | — | — | — | — | — | — | 3.78 (3.06,   | 5.06 (3.92,   | (0.80,  | <0.001 | (0.05, | (0.07,      | 1.26)        | <0.001 |
|                             |   |   |   |   |   |   |   |   |   | 4.58)         | 6.46)         | 1.26)   |        | 0.08)  | 0.11)       |              |        |
|                             |   |   |   |   |   |   |   |   |   |               |               | 1.50    |        | 0.14   | 0.21        | 1.51 (0.93,  |        |
| Eastern Europe              | — | — | — | — | — | — | — | — | — | 7.94 (5.81,   | 12.06 (8.73,  | (0.93,  | <0.001 | (0.10, | (0.15,      | 2.08)        | <0.001 |
|                             |   |   |   |   |   |   |   |   |   | 9.10)         | 16.93)        | 2.08)   |        | 0.16)  | 0.30)       |              |        |
|                             |   |   |   |   |   |   |   |   |   |               |               | -2.97   |        | 0.43   | 0.18        | -2.97        |        |
| Southern Sub-Saharan Africa | — | — | — | — | — | — | — | — | — | 24.17 (18.43, | 9.97 (5.78,   | (-4.27, | <0.001 | (0.33, | (0.10,      | (-4.27,      | <0.001 |
|                             |   |   |   |   |   |   |   |   |   | 31.71)        | 15.67)        | -1.66)  |        | 0.56)  | 0.28)       | -1.66)       |        |
|                             |   |   |   |   |   |   |   |   |   |               |               | 0.78    |        | 0.08   | 0.10        | 0.78 (0.41,  | <0.001 |
| High-income Asia            | — | — | — | — | — | — | — | — | — | 4.44 (3.59,   | 5.55 (4.53,   |         | <0.001 |        |             |              |        |

|                        |   |   |   |   |   |   |   |   |   |                      |                      |                |        |              |              |                    |        |
|------------------------|---|---|---|---|---|---|---|---|---|----------------------|----------------------|----------------|--------|--------------|--------------|--------------------|--------|
| Pacific                |   |   |   |   |   |   |   |   |   | 5.96)                | 6.64)                | (0.41, 1.15)   | 0.013  | (0.06, 0.11) | (0.08, 0.12) | 1.15)              |        |
| Central Europe         | — | — | — | — | — | — | — | — | — | 9.18 (7.96, 10.61)   | 9.69 (7.76, 11.91)   | (0.04, 0.38)   | 0.013  | (0.14, 0.19) | (0.14, 0.21) | 0.21 (0.04, 0.38)  | 0.013  |
| Andean Latin America   | — | — | — | — | — | — | — | — | — | 7.20 (4.70, 11.71)   | 6.90 (4.28, 10.55)   | (-0.75, 0.36)  | 0.493  | (0.08, 0.21) | (0.08, 0.19) | (-0.75, 0.37)      | 0.495  |
| Caribbean              | — | — | — | — | — | — | — | — | — | 4.71 (3.64, 7.54)    | 5.38 (3.56, 9.01)    | (0.19, 0.74)   | 0.001  | (0.06, 0.13) | (0.06, 0.16) | 0.47 (0.19, 0.74)  | 0.001  |
| Southern Latin America | — | — | — | — | — | — | — | — | — | 8.90 (6.62, 11.70)   | 8.33 (6.13, 10.75)   | (-0.52, 0.10)  | 0.190  | (0.12, 0.21) | (0.11, 0.19) | (-0.52, 0.10)      | 0.189  |
| Oceania                | — | — | — | — | — | — | — | — | — | 7.47 (4.31, 13.07)   | 6.36 (3.36, 12.38)   | (-0.83, -0.32) | <0.001 | (0.08, 0.23) | (0.06, 0.22) | (-0.83, -0.32)     | <0.001 |
| Australasia            | — | — | — | — | — | — | — | — | — | 7.34 (5.44, 9.80)    | 4.22 (2.87, 6.19)    | (-2.09, -1.66) | <0.001 | (0.10, 0.17) | (0.05, 0.11) | (-2.09, -1.66)     | <0.001 |
| <b>Men</b>             |   |   |   |   |   |   |   |   |   |                      |                      |                |        |              |              |                    |        |
| Global                 | — | — | — | — | — | — | — | — | — | 15.13 (12.72, 18.60) | 15.49 (14.01, 17.19) | (-0.16, 0.25)  | 0.663  | (0.22, 0.33) | (0.25, 0.30) | 0.05 (-0.16, 0.25) | 0.660  |
| <b>SDI category</b>    |   |   |   |   |   |   |   |   |   |                      |                      |                |        |              |              |                    |        |
| High                   | — | — | — | — | — | — | — | — | — | 21.36 (19.95, 22.77) | 18.35 (16.32, 20.27) | (-1.05, -0.12) | 0.013  | (0.35, 0.40) | (0.29, 0.36) | (-1.05, -0.13)     | 0.013  |
| High-middle            | — | — | — | — | — | — | — | — | — | 19.64 (16.83, 23.44) | 21.24 (18.77, 24.62) | (-0.22, 0.66)  | 0.338  | (0.30, 0.41) | (0.33, 0.43) | 0.22 (-0.22, 0.66) | 0.336  |
| Middle                 | — | — | — | — | — | — | — | — | — | 11.62 (9.36, 14.57)  | 13.10 (11.48, 15.18) | (-0.08, 0.36)  | 0.106  | (0.17, 0.21) | (0.20, 0.23) | 0.36 (-0.08, 0.81) | 0.108  |





|                             |   |   |   |   |   |   |   |   |   |                         |                         |                   |                 |                 |                       |                   |        |
|-----------------------------|---|---|---|---|---|---|---|---|---|-------------------------|-------------------------|-------------------|-----------------|-----------------|-----------------------|-------------------|--------|
| Africa                      |   |   |   |   |   |   |   |   |   | 33.81                   | 25.02                   | (-0.89,<br>-0.32) | (0.15,<br>0.60) | (0.15,<br>0.44) | (-0.89,<br>-0.32)     |                   |        |
|                             |   |   |   |   |   |   |   |   |   |                         |                         | -1.14             | 0.38            | 0.28            | -1.14                 |                   |        |
| Western Europe              | — | — | — | — | — | — | — | — | — | 21.62 (19.45,<br>23.85) | 15.59 (14.16,<br>17.39) | (-1.50,<br>-0.79) | <0.001          | (0.34,<br>0.42) | (0.25,<br>0.31)       | (-1.50,<br>-0.79) | <0.001 |
|                             |   |   |   |   |   |   |   |   |   |                         |                         | -0.54             | 0.47            | 0.41            | -0.54                 |                   |        |
| High-income North America   | — | — | — | — | — | — | — | — | — | 26.87 (24.96,<br>28.89) | 23.09 (17.91,<br>26.66) | (-1.16,<br>0.09)  | 0.092           | (0.44,<br>0.51) | (0.32,<br>0.47)       | (-1.16,<br>0.08)  | 0.089  |
|                             |   |   |   |   |   |   |   |   |   |                         |                         | 1.18              | 0.19            | 0.28            | 1.18 (0.71,<br>1.66)  | <0.001            |        |
| Central Asia                | — | — | — | — | — | — | — | — | — | 10.98 (9.01,<br>14.46)  | 15.85 (12.89,<br>19.55) | (0.70,<br>1.66)   | <0.001          | (0.16,<br>0.26) | (0.23,<br>0.35)       |                   | <0.001 |
|                             |   |   |   |   |   |   |   |   |   |                         |                         | 2.01              | 0.40            | 0.72            | 2.01 (1.34,<br>2.68)  | <0.001            |        |
| Eastern Europe              | — | — | — | — | — | — | — | — | — | 22.78 (17.59,<br>28.45) | 40.78 (33.33,<br>54.52) | (1.34,<br>2.68)   | <0.001          | (0.31,<br>0.50) | (0.59,<br>0.96)       |                   | <0.001 |
|                             |   |   |   |   |   |   |   |   |   |                         |                         | -1.68             | 0.61            | 0.39            | -1.68                 |                   |        |
| Southern Sub-Saharan Africa | — | — | — | — | — | — | — | — | — | 34.43 (27.27,<br>44.05) | 22.00 (16.46,<br>29.11) | (-3.28,<br>-0.06) | 0.043           | (0.48,<br>0.78) | (0.29,<br>0.51)       | (-3.29,<br>-0.06) | 0.043  |
|                             |   |   |   |   |   |   |   |   |   |                         |                         | 0.81              | 0.21            | 0.28            | 0.81 (0.56,<br>1.06)  | <0.001            |        |
| High-income Asia Pacific    | — | — | — | — | — | — | — | — | — | 12.15 (10.25,<br>14.93) | 15.69 (13.75,<br>18.04) | (0.56,<br>1.06)   | <0.001          | (0.18,<br>0.26) | (0.24,<br>0.32)       |                   | <0.001 |
|                             |   |   |   |   |   |   |   |   |   |                         |                         | 0.15              | 0.53            | 0.56            | 0.15 (-0.13,<br>0.44) | 0.295             |        |
| Central Europe              | — | — | — | — | — | — | — | — | — | 29.72 (25.60,<br>33.80) | 31.83 (27.64,<br>36.48) | (-0.13,<br>0.44)  | 0.295           | (0.45,<br>0.60) | (0.49,<br>0.64)       |                   | 0.295  |
|                             |   |   |   |   |   |   |   |   |   |                         |                         | -0.43             | 0.27            | 0.24            | -0.43                 |                   |        |
| Andean Latin America        | — | — | — | — | — | — | — | — | — | 15.25 (10.67,<br>21.61) | 13.75 (9.43,<br>19.55)  | (-0.78,<br>-0.07) | 0.018           | (0.19,<br>0.38) | (0.17,<br>0.34)       | (-0.79,<br>-0.07) | 0.018  |
|                             |   |   |   |   |   |   |   |   |   |                         |                         | 0.00              | 0.25            | 0.25            | 0.00 (-0.29,<br>0.30) | 0.992             |        |
| Caribbean                   | — | — | — | — | — | — | — | — | — | 14.35 (11.46,<br>18.12) | 14.10 (9.96,<br>18.80)  | (-0.29,<br>0.30)  | 0.991           | (0.20,<br>0.32) | (0.18,<br>0.33)       |                   | 0.992  |
|                             |   |   |   |   |   |   |   |   |   |                         |                         | 0.48              | 0.31            | 0.35            | 0.48 (0.10,<br>0.86)  | 0.014             |        |
| Southern Latin America      | — | — | — | — | — | — | — | — | — | 17.40 (13.92,<br>21.81) | 19.63 (15.54,<br>24.33) | (0.10,<br>0.86)   | 0.014           | (0.25,<br>0.39) | (0.27,<br>0.43)       |                   | 0.014  |
|                             |   |   |   |   |   |   |   |   |   |                         |                         | -0.21             | 0.70            | 0.66            | -0.21                 | <0.001            |        |
| Oceania                     | — | — | — | — | — | — | — | — | — | 39.42 (18.10,<br>50.74) | 37.54 (16.99,<br>58.09) | (-0.21,<br>0.56)  | <0.001          | (0.70,<br>0.66) | (0.66,<br>0.56)       |                   | <0.001 |

|                      |   |   |   |   |   |   |   |   |   |               |              |         |        |        |         |             |        |
|----------------------|---|---|---|---|---|---|---|---|---|---------------|--------------|---------|--------|--------|---------|-------------|--------|
|                      |   |   |   |   |   |   |   |   |   | 76.53)        | 69.58)       | (-0.32, | (0.32, | (0.30, | (-0.32, |             |        |
|                      |   |   |   |   |   |   |   |   |   |               |              | -0.11)  | 1.35)  | 1.23)  | -0.11)  |             |        |
|                      |   |   |   |   |   |   |   |   |   |               |              | -2.24   | 0.41   | 0.21   | -2.24   |             |        |
| Australasia          | — | — | — | — | — | — | — | — | — | 23.00 (18.62, | 11.96 (8.52, | (-2.69, | <0.001 | (0.33, | (0.15,  | (-2.68,     | <0.001 |
|                      |   |   |   |   |   |   |   |   |   | 29.05)        | 16.11)       | -1.80)  |        | 0.51)  | 0.28)   | -1.80)      |        |
| <b>35-39 years</b>   |   |   |   |   |   |   |   |   |   |               |              |         |        |        |         |             |        |
| <b>Women</b>         |   |   |   |   |   |   |   |   |   |               |              |         |        |        |         |             |        |
|                      |   |   |   |   |   |   |   |   |   |               |              |         |        |        |         |             |        |
| Global               | — | — | — | — | — | — | — | — | — | 8.92 (8.00,   | 8.71 (7.84,  | (-0.19, | 0.181  | (0.15, | (0.15,  | (-0.19,     | 0.191  |
|                      |   |   |   |   |   |   |   |   |   | 13.23)        | 10.15)       | 0.04)   |        | 0.26)  | 0.20)   | 0.04)       |        |
| <b>SDI category</b>  |   |   |   |   |   |   |   |   |   |               |              |         |        |        |         |             |        |
|                      |   |   |   |   |   |   |   |   |   |               |              |         |        |        |         |             |        |
| High                 | — | — | — | — | — | — | — | — | — | 10.22 (9.60,  | 8.85 (8.23,  | (-0.65, | <0.001 | (0.19, | (0.16,  | (-0.65,     | <0.001 |
|                      |   |   |   |   |   |   |   |   |   | 10.95)        | 9.65)        | -0.34)  |        | 0.21)  | 0.19)   | -0.34)      |        |
|                      |   |   |   |   |   |   |   |   |   |               |              |         |        |        |         |             |        |
| High-middle          | — | — | — | — | — | — | — | — | — | 9.54 (8.68,   | 9.99 (8.75,  | (0.05,  | 0.007  | (0.17, | (0.17,  | 0.16 (0.04, | 0.007  |
|                      |   |   |   |   |   |   |   |   |   | 10.99)        | 11.25)       | 0.28)   |        | 0.21)  | 0.22)   | 0.28)       |        |
|                      |   |   |   |   |   |   |   |   |   |               |              |         |        |        |         |             |        |
| Middle               | — | — | — | — | — | — | — | — | — | 7.83 (6.61,   | 7.63 (6.62,  | (-0.19, | 0.145  | (0.13, | (0.13,  | (-0.19,     | 0.151  |
|                      |   |   |   |   |   |   |   |   |   | 12.46)        | 8.82)        | 0.03)   |        | 0.24)  | 0.17)   | 0.03)       |        |
|                      |   |   |   |   |   |   |   |   |   |               |              |         |        |        |         |             |        |
| Low-middle           | — | — | — | — | — | — | — | — | — | 7.54 (5.76,   | 8.96 (7.35,  | (0.30,  | <0.001 | (0.11, | (0.14,  | 0.58 (0.31, | <0.001 |
|                      |   |   |   |   |   |   |   |   |   | 15.19)        | 12.30)       | 0.85)   |        | 0.29)  | 0.24)   | 0.86)       |        |
|                      |   |   |   |   |   |   |   |   |   |               |              |         |        |        |         |             |        |
| Low                  | — | — | — | — | — | — | — | — | — | 11.68 (6.80,  | 8.87 (6.36,  | (-1.14, | <0.001 | (0.13, | (0.12,  | (-1.13,     | <0.001 |
|                      |   |   |   |   |   |   |   |   |   | 24.80)        | 13.30)       | -0.77)  |        | 0.48)  | 0.26)   | -0.77)      |        |
| <b>21 GBD region</b> |   |   |   |   |   |   |   |   |   |               |              |         |        |        |         |             |        |
|                      |   |   |   |   |   |   |   |   |   |               |              |         |        |        |         |             |        |
| South Asia           | — | — | — | — | — | — | — | — | — | 5.48 (3.86,   | 6.98 (5.19,  | (0.46,  | <0.001 | (0.07, | (0.10,  | 0.83 (0.46, | <0.001 |
|                      |   |   |   |   |   |   |   |   |   | 12.34)        | 9.93)        | 1.20)   |        | 0.24)  | 0.19)   | 1.20)       |        |
|                      |   |   |   |   |   |   |   |   |   |               |              |         |        |        |         |             |        |
| East Asia            | — | — | — | — | — | — | — | — | — | 6.01 (4.35,   | 5.25 (3.99,  | (-0.47, | 0.002  | (0.08, | (0.08,  | (-0.80,     | 0.003  |
|                      |   |   |   |   |   |   |   |   |   | 11.01)        | 6.66)        | -0.17)  |        | 0.21)  | 0.13)   | -0.16)      |        |

|                              |   |   |   |   |   |   |   |   |   |                      |                      |                      |        |                   |                   |                      |        |
|------------------------------|---|---|---|---|---|---|---|---|---|----------------------|----------------------|----------------------|--------|-------------------|-------------------|----------------------|--------|
| North Africa and Middle East | — | — | — | — | — | — | — | — | — | 4.88 (3.43, 9.84)    | 4.90 (3.67, 6.81)    | 0.05 (-0.03, 0.13)   | 0.225  | 0.09 (0.07, 0.19) | 0.09 (0.07, 0.13) | 0.05 (-0.03, 0.13)   | 0.188  |
| Western Sub-Saharan Africa   | — | — | — | — | — | — | — | — | — | 24.41 (16.24, 39.16) | 10.98 (7.69, 15.42)  | -2.72 (-2.92, -2.52) | <0.001 | 0.47 (0.31, 0.76) | 0.21 (0.15, 0.30) | -2.72 (-2.92, -2.52) | <0.001 |
| Southeast Asia               | — | — | — | — | — | — | — | — | — | 7.20 (5.34, 13.39)   | 9.43 (7.25, 12.47)   | 0.94 (0.82, 1.07)    | <0.001 | 0.14 (0.10, 0.26) | 0.18 (0.14, 0.24) | 0.95 (0.82, 1.07)    | <0.001 |
| Eastern Sub-Saharan Africa   | — | — | — | — | — | — | — | — | — | 15.36 (7.23, 31.86)  | 10.98 (7.02, 15.22)  | -1.16 (-1.33, -0.98) | <0.001 | 0.30 (0.14, 0.62) | 0.21 (0.14, 0.29) | -1.15 (-1.33, -0.98) | <0.001 |
| Central Latin America        | — | — | — | — | — | — | — | — | — | 9.48 (8.25, 10.96)   | 8.13 (6.08, 10.78)   | -0.46 (-0.91, 0.00)  | 0.053  | 0.18 (0.16, 0.21) | 0.16 (0.12, 0.21) | -0.46 (-0.91, 0.00)  | 0.053  |
| Tropical Latin America       | — | — | — | — | — | — | — | — | — | 25.20 (22.70, 28.16) | 27.60 (24.43, 31.44) | 0.32 (0.08, 0.56)    | 0.010  | 0.49 (0.44, 0.55) | 0.53 (0.47, 0.61) | 0.32 (0.08, 0.56)    | 0.010  |
| Central Sub-Saharan Africa   | — | — | — | — | — | — | — | — | — | 12.09 (6.32, 24.36)  | 9.81 (5.53, 17.32)   | -0.76 (-1.10, -0.42) | <0.001 | 0.23 (0.12, 0.47) | 0.19 (0.11, 0.34) | -0.76 (-1.09, -0.41) | <0.001 |
| Western Europe               | — | — | — | — | — | — | — | — | — | 10.32 (9.18, 11.67)  | 8.09 (7.24, 9.08)    | -0.85 (-1.07, -0.64) | <0.001 | 0.20 (0.18, 0.23) | 0.16 (0.14, 0.18) | -0.85 (-1.07, -0.63) | <0.001 |
| High-income North America    | — | — | — | — | — | — | — | — | — | 12.32 (11.34, 13.25) | 11.53 (10.57, 13.13) | -0.24 (-0.59, 0.11)  | 0.175  | 0.24 (0.22, 0.26) | 0.22 (0.20, 0.25) | -0.24 (-0.59, 0.11)  | 0.178  |
| Central Asia                 | — | — | — | — | — | — | — | — | — | 7.38 (5.98, 8.79)    | 10.76 (8.43, 13.61)  | 1.32 (1.19, 1.45)    | <0.001 | 0.14 (0.12, 0.17) | 0.21 (0.16, 0.26) | 1.32 (1.19, 1.45)    | <0.001 |
| Eastern Europe               | — | — | — | — | — | — | — | — | — | 11.02 (7.90, 12.59)  | 16.47 (12.46, 22.11) | 1.42 (0.86, 1.97)    | <0.001 | 0.21 (0.15, 0.24) | 0.32 (0.24, 0.43) | 1.41 (0.86, 1.97)    | <0.001 |

|                     |   |   |   |   |   |   |   |   |   |               |               |         |        |        |        |              |        |
|---------------------|---|---|---|---|---|---|---|---|---|---------------|---------------|---------|--------|--------|--------|--------------|--------|
| Southern            |   |   |   |   |   |   |   |   |   | 30.95 (24.44, | 13.33 (8.28,  | -2.80   |        | 0.60   | 0.26   | -2.80        |        |
| Sub-Saharan Africa  | — | — | — | — | — | — | — | — | — | 39.78)        | 19.21)        | (-3.51, | <0.001 | (0.47, | (0.16, | (-3.51,      | <0.001 |
|                     |   |   |   |   |   |   |   |   |   |               |               | -2.08)  |        | 0.77)  | 0.37)  | -2.08)       |        |
| High-income Asia    |   |   |   |   |   |   |   |   |   | 5.21 (4.55,   | 7.17 (6.05,   | 1.07    |        | 0.10   | 0.14   | 1.07 (0.79,  |        |
| Pacific             | — | — | — | — | — | — | — | — | — | 6.24)         | 8.29)         | (0.79,  | <0.001 | (0.09, | (0.12, | 1.35)        | <0.001 |
|                     |   |   |   |   |   |   |   |   |   |               |               | 1.35)   |        | 0.12)  | 0.16)  | 1.35)        |        |
| Central Europe      |   |   |   |   |   |   |   |   |   | 13.82 (12.30, | 14.52 (11.71, | 0.17    |        | 0.27   | 0.28   | 0.15 (-0.02, |        |
|                     | — | — | — | — | — | — | — | — | — | 15.67)        | 17.69)        | (-0.02, | 0.076  | (0.24, | (0.23, | 0.32)        | 0.083  |
|                     |   |   |   |   |   |   |   |   |   |               |               | 0.36)   |        | 0.30)  | 0.34)  | 0.32)        |        |
| Andean Latin        |   |   |   |   |   |   |   |   |   | 7.67 (5.19,   | 7.21 (4.58,   | -0.29   |        | 0.15   | 0.14   | -0.29        |        |
| America             | — | — | — | — | — | — | — | — | — | 12.05)        | 10.57)        | (-0.86, | 0.321  | (0.10, | (0.09, | (-0.86,      | 0.325  |
|                     |   |   |   |   |   |   |   |   |   |               |               | 0.28)   |        | 0.23)  | 0.20)  | 0.29)        |        |
| Caribbean           |   |   |   |   |   |   |   |   |   | 9.17 (7.35,   | 9.95 (6.74,   | 0.28    |        | 0.18   | 0.19   | 0.28 (0.17,  |        |
|                     | — | — | — | — | — | — | — | — | — | 14.41)        | 16.10)        | (0.17,  | <0.001 | (0.14, | (0.13, | 0.39)        | <0.001 |
|                     |   |   |   |   |   |   |   |   |   |               |               | 0.39)   |        | 0.28)  | 0.31)  | 0.39)        |        |
| Southern Latin      |   |   |   |   |   |   |   |   |   | 11.50 (8.91,  | 10.97 (8.50,  | -0.15   |        | 0.22   | 0.21   | -0.15        |        |
| America             | — | — | — | — | — | — | — | — | — | 14.51)        | 13.84)        | (-0.38, | 0.205  | (0.17, | (0.16, | (-0.38,      | 0.197  |
|                     |   |   |   |   |   |   |   |   |   |               |               | 0.08)   |        | 0.28)  | 0.27)  | 0.08)        |        |
| Oceania             |   |   |   |   |   |   |   |   |   | 10.43 (5.99,  | 9.14 (5.00,   | -0.46   |        | 0.20   | 0.18   | -0.46        |        |
|                     | — | — | — | — | — | — | — | — | — | 18.22)        | 16.90)        | (-0.76, | 0.003  | (0.12, | (0.10, | (-0.76,      | 0.003  |
|                     |   |   |   |   |   |   |   |   |   |               |               | -0.16)  |        | 0.35)  | 0.33)  | -0.16)       |        |
| Australasia         |   |   |   |   |   |   |   |   |   | 10.79 (8.46,  | 6.55 (4.82,   | -1.76   |        | 0.21   | 0.13   | -1.76        |        |
|                     | — | — | — | — | — | — | — | — | — | 13.77)        | 8.74)         | (-1.97, | <0.001 | (0.16, | (0.09, | (-1.97,      | <0.001 |
|                     |   |   |   |   |   |   |   |   |   |               |               | -1.56)  |        | 0.27)  | 0.17)  | -1.56)       |        |
| <b>Men</b>          |   |   |   |   |   |   |   |   |   |               |               |         |        |        |        |              |        |
| Global              |   |   |   |   |   |   |   |   |   | 24.73 (20.68, | 26.46 (23.82, | 0.26    |        | 0.48   | 0.51   | 0.26 (0.07,  |        |
|                     | — | — | — | — | — | — | — | — | — | 30.47)        | 29.46)        | (0.07,  | 0.006  | (0.40, | (0.46, | 0.44)        | 0.006  |
|                     |   |   |   |   |   |   |   |   |   |               |               | 0.44)   |        | 0.59)  | 0.57)  | 0.44)        |        |
| <b>SDI category</b> |   |   |   |   |   |   |   |   |   |               |               |         |        |        |        |              |        |
| High                |   |   |   |   |   |   |   |   |   | 32.86 (30.88, | 31.03 (28.52, | -0.24   |        | 0.64   | 0.60   | -0.24        |        |
|                     | — | — | — | — | — | — | — | — | — | 34.97)        | 33.83)        | (-0.59, | 0.169  | (0.60, | (0.55, | (-0.59,      | 0.174  |
|                     |   |   |   |   |   |   |   |   |   |               |               | 0.10)   |        | 0.68)  | 0.65)  | 0.11)        |        |
| High-middle         |   |   |   |   |   |   |   |   |   | 31.76 (27.16, | 37.19 (33.29, | 0.60    |        | 0.61   | 0.72   | 0.60 (0.30,  |        |
|                     | — | — | — | — | — | — | — | — | — |               |               |         | <0.001 |        |        |              | <0.001 |

|                                 |   |   |   |   |   |   |   |   |   |               |               |         |        |        |        |              |        |
|---------------------------------|---|---|---|---|---|---|---|---|---|---------------|---------------|---------|--------|--------|--------|--------------|--------|
|                                 |   |   |   |   |   |   |   |   |   | 37.78)        | 42.38)        | (0.30,  | (0.53, | (0.64, | 0.90)  |              |        |
|                                 |   |   |   |   |   |   |   |   |   |               |               | 0.90)   | 0.73)  | 0.82)  |        |              |        |
|                                 |   |   |   |   |   |   |   |   |   |               |               | 0.39    | 0.37   | 0.41   |        |              |        |
| Middle                          | — | — | — | — | — | — | — | — | — | 19.00 (15.01, | 21.13 (18.55, | (0.12,  | 0.005  | (0.29, | (0.36, | 0.39 (0.11,  | 0.006  |
|                                 |   |   |   |   |   |   |   |   |   | 24.37)        | 24.31)        | (0.66,  |        | 0.47)  | 0.47)  | 0.66)        |        |
|                                 |   |   |   |   |   |   |   |   |   |               |               | 0.97    |        | 0.34   | 0.45   |              |        |
| Low-middle                      | — | — | — | — | — | — | — | — | — | 17.75 (10.47, | 23.28 (16.24, | (0.42,  | 0.001  | (0.20, | (0.31, | 0.97 (0.42,  | <0.001 |
|                                 |   |   |   |   |   |   |   |   |   | 28.31)        | 29.93)        | (1.52,  |        | 0.55)  | 0.58)  | 1.52)        |        |
|                                 |   |   |   |   |   |   |   |   |   |               |               | -0.24   |        | 0.47   | 0.44   | -0.24        |        |
| Low                             | — | — | — | — | — | — | — | — | — | 24.13 (12.15, | 22.54 (14.56, | (-0.47, | 0.047  | (0.24, | (0.28, | (-0.47,      | 0.046  |
|                                 |   |   |   |   |   |   |   |   |   | 41.45)        | 32.26)        | (-0.00) |        | 0.80)  | 0.62)  | (-0.00)      |        |
| <b>21 GBD region</b>            |   |   |   |   |   |   |   |   |   |               |               |         |        |        |        |              |        |
|                                 |   |   |   |   |   |   |   |   |   |               |               | 0.85    |        | 0.32   | 0.41   |              |        |
| South Asia                      | — | — | — | — | — | — | — | — | — | 16.56 (8.21,  | 21.02 (12.10, | (-0.06, | 0.067  | (0.16, | (0.23, | 0.85 (-0.06, | 0.066  |
|                                 |   |   |   |   |   |   |   |   |   | 28.78)        | 29.16)        | (1.77,  |        | 0.56)  | 0.56)  | 1.77)        |        |
|                                 |   |   |   |   |   |   |   |   |   |               |               | 1.01    |        | 0.36   | 0.47   |              |        |
| East Asia                       | — | — | — | — | — | — | — | — | — | 18.37 (12.97, | 24.39 (19.40, | (0.56,  | <0.001 | (0.25, | (0.38, | 1.01 (0.56,  | <0.001 |
|                                 |   |   |   |   |   |   |   |   |   | 26.05)        | 29.96)        | (1.46,  |        | 0.50)  | 0.58)  | 1.46)        |        |
|                                 |   |   |   |   |   |   |   |   |   |               |               | -1.37   |        | 0.56   | 0.38   | -1.37        |        |
| North Africa and<br>Middle East | — | — | — | — | — | — | — | — | — | 28.91 (17.43, | 19.39 (15.10, | (-1.55, | <0.001 | (0.34, | (0.29, | (-1.55,      | <0.001 |
|                                 |   |   |   |   |   |   |   |   |   | 45.38)        | 24.56)        | (-1.19, |        | 0.88)  | 0.48)  | (-1.19)      |        |
|                                 |   |   |   |   |   |   |   |   |   |               |               | -0.04   |        | 0.43   | 0.42   | -0.04        |        |
| Western<br>Sub-Saharan Africa   | — | — | — | — | — | — | — | — | — | 22.24 (12.49, | 21.91 (15.28, | (-0.18, | 0.592  | (0.24, | (0.30, | (-0.18,      | 0.588  |
|                                 |   |   |   |   |   |   |   |   |   | 34.36)        | 30.17)        | (0.10,  |        | 0.67)  | 0.58)  | 0.10)        |        |
|                                 |   |   |   |   |   |   |   |   |   |               |               | 0.84    |        | 0.27   | 0.34   |              |        |
| Southeast Asia                  | — | — | — | — | — | — | — | — | — | 13.73 (9.88,  | 17.52 (13.37, | (0.55,  | <0.001 | (0.19, | (0.26, | 0.84 (0.56,  | <0.001 |
|                                 |   |   |   |   |   |   |   |   |   | 18.94)        | 22.73)        | (1.13,  |        | 0.37)  | 0.44)  | 1.13)        |        |
|                                 |   |   |   |   |   |   |   |   |   |               |               | -0.97   |        | 0.69   | 0.52   | -0.97        |        |
| Eastern Sub-Saharan<br>Africa   | — | — | — | — | — | — | — | — | — | 35.69 (18.21, | 26.92 (17.05, | (-1.07, | <0.001 | (0.35, | (0.33, | (-1.07,      | <0.001 |
|                                 |   |   |   |   |   |   |   |   |   | 64.27)        | 38.87)        | (-0.86, |        | 1.24)  | 0.75)  | (-0.86)      |        |
|                                 |   |   |   |   |   |   |   |   |   |               |               | 0.01    |        | 0.40   | 0.40   |              |        |
| Central Latin<br>America        | — | — | — | — | — | — | — | — | — | 20.47 (18.26, | 20.62 (15.99, | (-0.26, | 0.961  | (0.35, | (0.31, | 0.01 (-0.26, | 0.959  |
|                                 |   |   |   |   |   |   |   |   |   | 23.37)        | 26.01)        | (0.28)  |        | 0.45)  | 0.50)  | 0.28)        |        |

|                             |   |   |   |   |   |   |   |   |                      |                       |                      |        |                   |                   |                      |        |
|-----------------------------|---|---|---|---|---|---|---|---|----------------------|-----------------------|----------------------|--------|-------------------|-------------------|----------------------|--------|
| Tropical Latin America      | — | — | — | — | — | — | — | — | 53.84 (49.17, 59.52) | 56.09 (49.79, 62.94)  | 0.17 (-0.20, 0.53)   | 0.372  | 1.04 (0.95, 1.15) | 1.08 (0.96, 1.22) | 0.17 (-0.20, 0.53)   | 0.372  |
| Central Sub-Saharan Africa  | — | — | — | — | — | — | — | — | 30.80 (15.35, 55.94) | 26.19 (15.13, 43.61)  | -0.59 (-0.84, -0.33) | <0.001 | 0.60 (0.30, 1.08) | 0.51 (0.29, 0.84) | -0.59 (-0.85, -0.33) | <0.001 |
| Western Europe              | — | — | — | — | — | — | — | — | 33.39 (30.59, 36.42) | 25.22 (22.90, 27.82)  | -1.07 (-1.29, -0.85) | <0.001 | 0.65 (0.59, 0.70) | 0.49 (0.44, 0.54) | -1.07 (-1.29, -0.85) | <0.001 |
| High-income North America   | — | — | — | — | — | — | — | — | 40.56 (38.04, 43.60) | 38.18 (32.39, 43.01)  | -0.19 (-0.79, 0.41)  | 0.532  | 0.78 (0.74, 0.84) | 0.74 (0.63, 0.83) | -0.19 (-0.79, 0.41)  | 0.531  |
| Central Asia                | — | — | — | — | — | — | — | — | 19.10 (15.57, 25.33) | 28.43 (23.83, 34.67)  | 1.21 (0.69, 1.73)    | <0.001 | 0.37 (0.30, 0.49) | 0.55 (0.46, 0.67) | 1.21 (0.69, 1.73)    | <0.001 |
| Eastern Europe              | — | — | — | — | — | — | — | — | 40.34 (31.49, 50.72) | 78.46 (63.30, 101.28) | 2.46 (1.12, 3.82)    | <0.001 | 0.78 (0.61, 0.98) | 1.52 (1.22, 1.96) | 2.46 (1.12, 3.82)    | <0.001 |
| Southern Sub-Saharan Africa | — | — | — | — | — | — | — | — | 55.20 (42.97, 71.26) | 34.41 (24.77, 45.92)  | -1.62 (-2.36, -0.88) | <0.001 | 1.07 (0.83, 1.38) | 0.67 (0.48, 0.89) | -1.62 (-2.36, -0.88) | <0.001 |
| High-income Asia Pacific    | — | — | — | — | — | — | — | — | 21.15 (18.59, 24.40) | 33.77 (30.14, 38.71)  | 1.65 (1.29, 2.00)    | <0.001 | 0.41 (0.36, 0.47) | 0.65 (0.58, 0.75) | 1.64 (1.29, 2.00)    | <0.001 |
| Central Europe              | — | — | — | — | — | — | — | — | 42.96 (37.61, 48.19) | 48.92 (41.81, 56.63)  | 0.38 (0.05, 0.72)    | 0.025  | 0.83 (0.73, 0.93) | 0.95 (0.81, 1.10) | 0.38 (0.05, 0.72)    | 0.025  |
| Andean Latin America        | — | — | — | — | — | — | — | — | 19.24 (13.18, 26.30) | 16.65 (11.46, 23.78)  | -0.45 (-0.89, -0.00) | 0.049  | 0.37 (0.25, 0.51) | 0.32 (0.22, 0.46) | -0.45 (-0.89, -0.00) | 0.048  |
| Caribbean                   | — | — | — | — | — | — | — | — | 24.13 (18.96, 30.94) | 25.08 (17.90, 34.16)  | 0.17 (-0.02, 0.37)   | 0.074  | 0.47 (0.37, 0.60) | 0.49 (0.35, 0.66) | 0.18 (-0.01, 0.37)   | 0.070  |

|                        |                   |                   |                      |        |                   |                   |                      |        |                      |                      |                      |        |                   |                   |                      |        |
|------------------------|-------------------|-------------------|----------------------|--------|-------------------|-------------------|----------------------|--------|----------------------|----------------------|----------------------|--------|-------------------|-------------------|----------------------|--------|
| Southern Latin America | —                 | —                 | —                    | —      | —                 | —                 | —                    | —      | 28.22 (22.45, 35.52) | 29.43 (23.19, 36.78) | 0.20 (-0.29, 0.69)   | 0.418  | 0.55 (0.43, 0.69) | 0.57 (0.45, 0.71) | 0.20 (-0.29, 0.68)   | 0.424  |
| Oceania                | —                 | —                 | —                    | —      | —                 | —                 | —                    | —      | 48.38 (23.00, 93.27) | 43.78 (20.96, 81.65) | -0.34 (-0.43, -0.25) | <0.001 | 0.94 (0.45, 1.81) | 0.85 (0.41, 1.58) | -0.34 (-0.43, -0.25) | <0.001 |
| Australasia            | —                 | —                 | —                    | —      | —                 | —                 | —                    | —      | 30.07 (23.74, 37.63) | 18.57 (12.94, 24.77) | -1.66 (-2.27, -1.05) | <0.001 | 0.58 (0.46, 0.73) | 0.36 (0.25, 0.48) | -1.66 (-2.27, -1.05) | <0.001 |
| <b>Endocarditis</b>    |                   |                   |                      |        |                   |                   |                      |        |                      |                      |                      |        |                   |                   |                      |        |
| <b>15-19 years</b>     |                   |                   |                      |        |                   |                   |                      |        |                      |                      |                      |        |                   |                   |                      |        |
| <b>Women</b>           |                   |                   |                      |        |                   |                   |                      |        |                      |                      |                      |        |                   |                   |                      |        |
| Global                 | 4.23 (2.23, 6.88) | 3.76 (1.89, 6.16) | -0.39 (-0.50, -0.28) | <0.001 | 0.71 (0.44, 1.04) | 0.67 (0.41, 1.00) | -0.21 (-0.29, -0.13) | <0.001 | 7.27 (4.33, 9.34)    | 6.22 (4.28, 8.13)    | -0.52 (-0.70, -0.35) | <0.001 | 0.10 (0.06, 0.13) | 0.09 (0.06, 0.11) | -0.53 (-0.70, -0.35) | <0.001 |
| <b>SDI category</b>    |                   |                   |                      |        |                   |                   |                      |        |                      |                      |                      |        |                   |                   |                      |        |
| High                   | 4.36 (2.14, 7.18) | 4.01 (2.05, 6.64) | -0.29 (-0.34, -0.24) | <0.001 | 1.09 (0.71, 1.52) | 0.95 (0.62, 1.33) | -0.44 (-0.48, -0.41) | <0.001 | 3.26 (2.27, 4.56)    | 2.40 (1.40, 2.86)    | -1.03 (-1.47, -0.59) | <0.001 | 0.04 (0.03, 0.06) | 0.03 (0.02, 0.04) | -1.04 (-1.50, -0.59) | <0.001 |
| High-middle            | 5.10 (2.72, 8.33) | 4.25 (2.08, 7.11) | -0.61 (-0.72, -0.50) | <0.001 | 0.78 (0.49, 1.12) | 0.78 (0.47, 1.14) | -0.00 (-0.04, 0.04)  | 0.929  | 6.35 (4.28, 7.86)    | 5.29 (4.22, 6.91)    | -0.57 (-1.06, -0.07) | 0.024  | 0.09 (0.06, 0.11) | 0.07 (0.06, 0.10) | -0.57 (-1.07, -0.07) | 0.024  |
| Middle                 | 4.90 (2.63, 7.86) | 4.08 (2.05, 6.70) | -0.62 (-0.69, -0.54) | <0.001 | 0.81 (0.50, 1.19) | 0.79 (0.47, 1.21) | -0.07 (-0.10, -0.05) | <0.001 | 8.61 (5.35, 11.32)   | 7.65 (5.67, 10.24)   | -0.40 (-0.58, -0.22) | <0.001 | 0.12 (0.07, 0.16) | 0.11 (0.08, 0.14) | -0.40 (-0.58, -0.22) | <0.001 |
| Low-middle             | 3.02 (1.56, 4.95) | 3.44 (1.73, 5.66) | 0.51 (0.40, 0.61)    | <0.001 | 0.43 (0.25, 0.64) | 0.49 (0.30, 0.75) | 0.52 (0.41, 0.64)    | <0.001 | 8.09 (3.88, 13.01)   | 6.90 (4.31, 9.98)    | -0.56 (-0.74, -0.37) | <0.001 | 0.11 (0.05, 0.18) | 0.10 (0.06, 0.14) | -0.56 (-0.74, -0.38) | <0.001 |
| Low                    | 2.74 (1.41, 4.48) | 3.29 (1.69, 5.41) | 0.68 (0.53, 0.82)    | <0.001 | 0.46 (0.26, 0.72) | 0.53 (0.30, 0.82) | 0.49 (0.44, 0.54)    | <0.001 | 7.11 (2.76, 11.23)   | 5.56 (3.00, 7.81)    | -0.87 (-1.19, -0.54) | <0.001 | 0.10 (0.04, 0.16) | 0.08 (0.04, 0.11) | -0.87 (-1.21, -0.53) | <0.001 |
| <b>21 GBD region</b>   |                   |                   |                      |        |                   |                   |                      |        |                      |                      |                      |        |                   |                   |                      |        |
| South Asia             | 2.43 (1.24, 3.30) | 3.30 (1.66, 5.14) | 1.14 (0.99, 1.29)    | <0.001 | 0.30 (0.18, 0.42) | 0.38 (0.23, 0.53) | 0.84 (0.74, 0.94)    | <0.001 | 6.69 (2.52, 10.86)   | 5.82 (2.99, 8.65)    | -0.51 (-0.74, -0.28) | 0.010  | 0.09 (0.04, 0.14) | 0.08 (0.04, 0.12) | -0.52 (-0.74, -0.30) | 0.009  |

|                              | 4.04)       | 5.37)       | 1.29)         |        | 0.46)       | 0.58)       | 0.93)       |        | 12.69)        | 9.59)         | (-0.90, | (0.03, | (0.04,  | (-0.91, |             |        |
|------------------------------|-------------|-------------|---------------|--------|-------------|-------------|-------------|--------|---------------|---------------|---------|--------|---------|---------|-------------|--------|
|                              |             |             |               |        |             |             |             |        |               |               | -0.12)  | 0.18)  | 0.13)   | -0.13)  |             |        |
|                              |             |             |               |        |             |             | -0.84       |        |               |               | -3.69   | 0.07   | 0.02    | -3.75   |             |        |
| East Asia                    | 7.03 (3.91, | 3.79 (1.75, | -2.11 (-2.36, | <0.001 | 0.80 (0.51, | 0.62 (0.37, | (-0.95,     | <0.001 | 4.83 (1.94,   | 1.63 (1.18,   | (-4.04, | <0.001 | (0.03,  | (0.02,  | (-4.11,     | <0.001 |
|                              |             | 11.16)      | 6.45)         |        | -1.86)      | 1.15)       | 0.92)       |        | (-0.72)       | 6.98)         | 2.54)   |        | -3.34)  | 0.10)   | 0.04)       |        |
| North Africa and Middle East | 3.70 (1.88, | 4.57 (2.34, | 0.72 (0.69,   | <0.001 | 0.52 (0.32, | 0.61 (0.37, | 0.54 (0.52, | <0.001 | 5.94 (3.45,   | 4.37 (2.72,   | (-1.29, | <0.001 | (0.05,  | (0.04,  | (-1.30,     | <0.001 |
|                              |             | 6.04)       | 7.50)         |        | 0.75)       | 0.77)       | 0.90)       |        | 0.57)         | 8.89)         | 6.27)   |        | -0.72)  | 0.12)   | 0.09)       |        |
| Western Sub-Saharan Africa   | 3.16 (1.64, | 3.56 (1.80, | 0.47 (0.26,   | <0.001 | 0.52 (0.30, | 0.57 (0.33, | 0.32 (0.24, | <0.001 | 4.52 (1.71,   | 2.58 (1.58,   | (-2.08, | <0.001 | (0.02,  | (0.02,  | (-2.11,     | <0.001 |
|                              |             | 5.14)       | 5.82)         |        | 0.68)       | 0.82)       | 0.88)       |        | 0.41)         | 7.38)         | 3.91)   |        | -1.81)  | 0.10)   | 0.05)       |        |
| Southeast Asia               | 3.68 (1.92, | 4.59 (2.35, | 0.77 (0.74,   | <0.001 | 1.16 (0.67, | 1.21 (0.73, | 0.14 (0.08, | <0.001 | 18.00 (10.53, | 17.21 (11.73, | (-0.37, | 0.048  | (0.15,  | (0.16,  | (-0.37,     | 0.048  |
|                              |             | 5.98)       | 7.36)         |        | 0.80)       | 1.81)       | 1.86)       |        | 0.19)         | 28.76)        | 24.09)  |        | -0.00)  | 0.40)   | 0.34)       |        |
| Eastern Sub-Saharan Africa   | 2.94 (1.57, | 3.22 (1.67, | 0.37 (0.26,   | <0.001 | 0.74 (0.39, | 0.80 (0.42, | 0.27 (0.18, | <0.001 | 11.86 (4.00,  | 8.40 (3.90,   | (-1.42, | <0.001 | (0.06,  | (0.05,  | (-1.43,     | <0.001 |
|                              |             | 4.77)       | 5.28)         |        | 0.49)       | 1.23)       | 1.34)       |        | 0.35)         | 21.29)        | 14.30)  |        | -0.94)  | 0.30)   | 0.20)       |        |
| Central Latin America        | 3.43 (1.70, | 3.87 (1.75, | 0.40 (0.29,   | <0.001 | 0.62 (0.37, | 0.66 (0.39, | 0.25 (0.22, | <0.001 | 5.70 (4.55,   | 6.72 (4.43,   | 0.72    | 0.001  | 0.08    | 0.09    | 0.72 (0.31, | 0.001  |
|                              |             | 5.65)       | 6.56)         |        | 0.52)       | 0.93)       | 1.02)       |        | 0.28)         | 8.45)         | 8.82)   |        | (0.30,  | 0.12)   | 0.12)       |        |
| Tropical Latin America       | 3.46 (1.74, | 3.44 (1.49, | -0.02 (-0.24, | 0.841  | 0.89 (0.49, | 0.95 (0.52, | 0.23 (0.21, | <0.001 | 15.37 (11.70, | 13.01 (10.24, | -0.46   | <0.001 | 0.21    | 0.18    | -0.47       | <0.001 |
|                              |             | 5.74)       | 5.99)         |        | 0.20)       | 1.43)       | 1.54)       |        | 0.25)         | 21.69)        | 22.14)  |        | (-0.62, | 0.30)   | 0.31)       |        |
| Central Sub-Saharan Africa   | 2.55 (1.34, | 2.95 (1.51, | 0.55 (0.37,   | <0.001 | 0.69 (0.35, | 0.72 (0.37, | 0.20 (0.13, | <0.001 | 9.40 (2.99,   | 7.61 (3.23,   | -0.73   | <0.001 | 0.13    | 0.11    | -0.74       | <0.001 |
|                              |             | 4.12)       | 4.86)         |        | 0.73)       | 1.21)       | 1.25)       |        | 0.26)         | 18.90)        | 14.59)  |        | (-1.02, | 0.26)   | 0.20)       |        |
| Western Europe               | 4.08 (1.95, | 4.22 (1.97, | 0.11 (0.03,   | 0.009  | 0.90 (0.58, | 0.79 (0.50, | -0.48       | <0.001 | 2.23 (1.69,   | 2.41 (1.22,   | 0.27    | 0.043  | 0.03    | 0.03    | 0.29 (0.03, | 0.027  |
|                              |             | 6.78)       | 7.03)         |        | 0.20)       | 1.29)       | 1.16)       |        | (-0.61,       | 3.65)         | 3.06)   |        | (0.01,  | 0.05)   | 0.04)       |        |
| High-income North America    | 4.72 (2.34, | 3.59 (1.92, | -0.93 (-0.99, | <0.001 | 1.22 (0.80, | 1.03 (0.68, | -0.54       | <0.001 | 1.40 (1.11,   | 2.18 (1.13,   | 1.68    | <0.001 | 0.02    | 0.03    | 1.80 (0.89, | <0.001 |
|                              |             | 7.85)       | 5.78)         |        | -0.87)      | 1.76)       | 1.50)       |        | (-0.66,       | 2.43)         | 2.66)   |        | (0.81,  | 0.03)   | 0.04)       |        |
| Central Asia                 | 1.89 (0.89, | 2.42 (1.18, | 0.86 (0.81,   | <0.001 | 0.19 (0.10, | 0.23 (0.12, | 0.69 (0.66, | <0.001 | 1.69 (1.22,   | 3.18 (2.23,   | 2.22    | <0.001 | 0.02    | 0.04    | 2.23 (1.67, | <0.001 |



|                             | 3.37)       | 4.07)       | 0.91)         |        | 0.31)       | 0.37)       | 0.71)        |        | 2.78)         | 4.68)        | (1.66,  | (0.02,  | (0.03, | 2.80)  |             |        |
|-----------------------------|-------------|-------------|---------------|--------|-------------|-------------|--------------|--------|---------------|--------------|---------|---------|--------|--------|-------------|--------|
|                             |             |             |               |        |             |             |              |        |               |              | 2.79)   | 0.04)   | 0.07)  |        |             |        |
|                             |             |             |               |        |             |             |              |        |               |              | 1.30    | 0.09    | 0.13   |        |             |        |
| Eastern Europe              | 3.79 (1.87, | 5.69 (2.91, | 1.40 (1.27,   | <0.001 | 0.52 (0.31, | 0.68 (0.41, | 0.88 (0.85,  | <0.001 | 6.25 (5.09,   | 9.13 (5.60,  | (0.29,  | 0.012   | (0.07, | (0.08, | 1.31 (0.29, | 0.012  |
|                             | 6.24)       | 9.27)       | 1.53)         |        | 0.80)       | 1.03)       | 0.92)        |        | 10.20)        | 11.59)       | 2.33)   | 0.14)   | 0.16)  | 2.34)  |             |        |
| Southern Sub-Saharan Africa | 4.61 (2.45, | 4.43 (2.32, | -0.11 (-0.31, | 0.296  | 1.86 (0.96, | 1.65 (0.85, | -0.41        | <0.001 | 22.73 (11.72, | 9.59 (5.85,  | -2.80   |         | 0.32   | 0.13   | -2.83       | <0.001 |
|                             | 7.38)       | 7.16)       | 0.10)         |        | 3.26)       | 2.89)       | (-0.46,      |        | (-0.36)       | 32.07)       | 15.85)  | (-3.42, | <0.001 | (0.16, | (0.08,      |        |
| High-income Asia Pacific    | 4.43 (2.17, | 4.13 (2.00, | -0.26 (-0.28, | <0.001 | 1.31 (0.80, | 1.22 (0.75, | -0.25        | <0.001 | 6.25 (3.48,   | 2.10 (1.59,  | -3.87   |         | 0.09   | 0.03   | -3.97       | <0.001 |
|                             | 7.27)       | 6.87)       | -0.23)        |        | 1.91)       | 1.77)       | (-0.30,      |        | (-0.21)       | 9.74)        | 3.35)   | (-5.18, | <0.001 | (0.05, | (0.02,      |        |
| Central Europe              | 3.25 (1.52, | 3.54 (1.68, | 0.30 (0.24,   | <0.001 | 0.37 (0.22, | 0.37 (0.21, | 0.01 (-0.04, | 0.665  | 2.26 (1.80,   | 2.56 (1.29,  | 0.49    |         | 0.03   | 0.04   | 0.50 (0.12, | 0.010  |
|                             | 5.46)       | 6.01)       | 0.35)         |        | 0.57)       | 0.58)       | 0.06)        |        | 3.54)         | 3.39)        | (0.11,  | 0.011   | (0.02, | (0.02, | 0.88)       |        |
| Andean Latin America        | 2.17 (1.08, | 3.55 (1.75, | 1.73 (1.66,   | <0.001 | 0.46 (0.26, | 0.61 (0.36, | 1.02 (0.99,  | <0.001 | 11.28 (6.96,  | 8.02 (4.73,  | -1.21   |         | 0.16   | 0.11   | -1.22       | <0.001 |
|                             | 3.66)       | 5.90)       | 1.79)         |        | 0.73)       | 0.96)       | 1.05)        |        | 17.64)        | 12.84)       | (-1.87, | <0.001  | (0.10, | (0.07, | (-1.89,     |        |
| Caribbean                   | 3.75 (1.91, | 5.94 (3.14, | 1.60 (1.55,   | <0.001 | 0.59 (0.36, | 0.73 (0.46, | 0.78 (0.74,  | <0.001 | 10.26 (6.96,  | 12.16 (7.54, | 0.78    |         | 0.14   | 0.17   | 0.78 (0.52, | <0.001 |
|                             | 6.14)       | 9.43)       | 1.66)         |        | 0.88)       | 1.08)       | 0.82)        |        | 14.75)        | 19.89)       | (0.52,  | <0.001  | (0.10, | (0.10, | 1.04)       |        |
| Southern Latin America      | 2.76 (1.34, | 4.77 (2.40, | 1.92 (1.87,   | <0.001 | 0.77 (0.46, | 0.91 (0.57, | 0.56 (0.51,  | <0.001 | 5.65 (3.36,   | 6.54 (4.52,  | 0.46    |         | 0.08   | 0.09   | 0.46 (0.19, | 0.001  |
|                             | 4.68)       | 7.94)       | 1.97)         |        | 1.18)       | 1.38)       | 0.61)        |        | 8.75)         | 9.66)        | (0.19,  | 0.001   | (0.05, | (0.06, | 0.73)       |        |
| Oceania                     | 4.30 (2.23, | 5.12 (2.83, | 0.62 (0.56,   | <0.001 | 0.53 (0.33, | 0.56 (0.35, | 0.20 (0.18,  | <0.001 | 6.80 (3.64,   | 10.64 (5.11, | 1.48    |         | 0.09   | 0.15   | 1.48 (0.94, | <0.001 |
|                             | 6.94)       | 8.11)       | 0.68)         |        | 0.78)       | 0.83)       | 0.22)        |        | 12.66)        | 19.73)       | (0.94,  | <0.001  | (0.05, | (0.07, | 2.02)       |        |
| Australasia                 | 3.62 (1.74, | 3.68 (1.68, | 0.05 (-0.01,  | 0.108  | 0.71 (0.45, | 0.62 (0.37, | -0.45        | <0.001 | 2.32 (1.60,   | 2.35 (1.03,  | -0.08   |         | 0.03   | 0.03   | -0.07       | 0.902  |
|                             | 6.05)       | 6.32)       | 0.11)         |        | 1.02)       | 0.91)       | (-0.49,      |        | (-0.40)       | 3.91)        | 3.54)   | (-1.20, | 0.888  | (0.02, | (0.01,      |        |
| <b>Men</b>                  |             |             |               |        |             |             |              |        |               |              |         |         |        |        |             |        |
| Global                      | 4.80 (2.57, | 4.51 (2.32, | -0.20 (-0.33, | 0.003  | 0.66 (0.42, | 0.65 (0.40, | -0.07        | 0.024  | 8.07 (5.25,   | 7.13 (5.01,  | -0.41   |         | 0.11   | 0.10   | -0.41       | <0.001 |
|                             | 7.77)       | 7.31)       | -0.07)        |        | 0.96)       | 0.95)       | (-0.12,      |        | (-0.01)       | 10.12)       | 9.13)   | (-0.59, | <0.001 | (0.07, | (0.07,      |        |
|                             |             |             |               |        |             |             |              |        |               |              | -0.23)  | 0.14)   | 0.13)  | -0.23) |             |        |
| 305                         |             |             |               |        |             |             |              |        |               |              |         |         |        |        |             |        |

| SDI category                 |                    |                    |                      |        |                   |                   |                      |        |                      |                      |                      |        |                   |                   |                      |        |
|------------------------------|--------------------|--------------------|----------------------|--------|-------------------|-------------------|----------------------|--------|----------------------|----------------------|----------------------|--------|-------------------|-------------------|----------------------|--------|
| SDI category                 | 2000               | 2005               | 2010                 | 2015   | 2020              | 2025              | 2030                 | 2035   | 2040                 | 2045                 | 2050                 | 2055   | 2060              | 2065              | 2070                 | 2075   |
| High                         | 5.13 (2.57, 8.41)  | 4.53 (2.34, 7.32)  | -0.43 (-0.47, -0.40) | <0.001 | 0.86 (0.56, 1.21) | 0.76 (0.51, 1.07) | -0.42 (-0.44, -0.40) | <0.001 | 3.81 (2.42, 5.30)    | 2.75 (1.42, 3.46)    | -1.13 (-1.36, -0.90) | <0.001 | 0.05 (0.03, 0.07) | 0.04 (0.02, 0.05) | -1.14 (-1.38, -0.90) | <0.001 |
|                              | 5.75 (3.13, 9.20)  | 4.88 (2.44, 8.00)  | -0.57 (-0.67, -0.47) | <0.001 | 0.76 (0.49, 1.09) | 0.76 (0.47, 1.10) | 0.00 (-0.03, 0.04)   | 0.932  | 9.53 (6.05, 12.59)   | 6.72 (5.33, 8.90)    | -1.12 (-1.62, -0.61) | <0.001 | 0.13 (0.08, 0.18) | 0.09 (0.07, 0.12) | -1.12 (-1.63, -0.61) | <0.001 |
| Middle                       | 5.29 (2.87, 8.53)  | 4.70 (2.39, 7.64)  | -0.40 (-0.46, -0.33) | <0.001 | 0.74 (0.47, 1.08) | 0.75 (0.46, 1.10) | 0.03 (-0.01, 0.08)   | 0.128  | 9.09 (6.14, 11.85)   | 8.70 (6.18, 11.30)   | -0.15 (-0.32, 0.03)  | 0.100  | 0.13 (0.09, 0.16) | 0.12 (0.09, 0.16) | -0.15 (-0.32, 0.03)  | 0.110  |
|                              | 3.59 (1.88, 5.84)  | 4.18 (2.16, 6.78)  | 0.55 (0.41, 0.69)    | <0.001 | 0.44 (0.26, 0.66) | 0.51 (0.31, 0.77) | 0.59 (0.46, 0.72)    | <0.001 | 7.17 (4.45, 9.62)    | 6.80 (4.69, 9.41)    | -0.19 (-0.57, 0.19)  | 0.330  | 0.10 (0.06, 0.13) | 0.09 (0.07, 0.13) | -0.19 (-0.57, 0.19)  | 0.330  |
| Low                          | 3.59 (1.90, 5.76)  | 4.42 (2.33, 7.21)  | 0.74 (0.68, 0.80)    | <0.001 | 0.45 (0.27, 0.68) | 0.54 (0.33, 0.82) | 0.69 (0.57, 0.80)    | <0.001 | 8.60 (4.32, 15.05)   | 7.57 (4.23, 12.03)   | -0.44 (-0.81, -0.07) | 0.020  | 0.12 (0.06, 0.21) | 0.11 (0.06, 0.17) | -0.44 (-0.81, -0.07) | 0.020  |
|                              | 21 GBD region      |                    |                      |        |                   |                   |                      |        |                      |                      |                      |        |                   |                   |                      |        |
| South Asia                   | 2.94 (1.49, 4.85)  | 3.91 (1.99, 6.45)  | 1.00 (0.90, 1.10)    | <0.001 | 0.33 (0.20, 0.51) | 0.42 (0.25, 0.64) | 0.85 (0.80, 0.90)    | <0.001 | 4.62 (2.86, 6.72)    | 4.65 (3.01, 6.95)    | 0.06 (-1.51, 1.64)   | 0.945  | 0.06 (0.04, 0.09) | 0.06 (0.04, 0.10) | 0.06 (-1.50, 1.64)   | 0.945  |
|                              | 7.28 (4.08, 11.43) | 3.71 (1.75, 6.19)  | -2.23 (-2.61, -1.83) | <0.001 | 0.79 (0.51, 1.14) | 0.59 (0.36, 0.89) | -0.96 (-1.15, -0.77) | <0.001 | 8.38 (3.25, 12.80)   | 2.36 (1.67, 3.81)    | -4.19 (-5.01, -3.36) | <0.001 | 0.12 (0.04, 0.18) | 0.03 (0.02, 0.05) | -4.22 (-5.05, -3.39) | <0.001 |
| North Africa and Middle East | 5.33 (2.79, 8.59)  | 6.61 (3.57, 10.61) | 0.75 (0.70, 0.80)    | <0.001 | 0.70 (0.44, 1.00) | 0.83 (0.53, 1.19) | 0.61 (0.57, 0.65)    | <0.001 | 8.09 (5.07, 12.68)   | 6.54 (3.88, 10.59)   | -0.71 (-0.86, -0.56) | <0.001 | 0.11 (0.07, 0.18) | 0.09 (0.05, 0.15) | -0.71 (-0.86, -0.56) | <0.001 |
|                              | 4.60 (2.56, 7.42)  | 5.28 (2.92, 8.57)  | 0.55 (0.32, 0.78)    | <0.001 | 0.52 (0.32, 0.78) | 0.59 (0.36, 0.87) | 0.46 (0.30, 0.61)    | <0.001 | 4.82 (2.50, 8.07)    | 3.80 (2.37, 5.83)    | -0.81 (-1.00, -0.62) | <0.001 | 0.07 (0.03, 0.11) | 0.05 (0.03, 0.08) | -0.82 (-1.01, -0.63) | <0.001 |
| Southeast Asia               | 3.85 (1.99, 6.24)  | 4.68 (2.46, 7.51)  | 0.71 (0.63, 0.79)    | <0.001 | 0.92 (0.55, 1.36) | 0.99 (0.60, 1.46) | 0.27 (0.23, 0.30)    | <0.001 | 15.38 (10.21, 24.30) | 18.82 (12.25, 26.00) | 0.80 (0.42, 1.18)    | <0.001 | 0.21 (0.14, 0.34) | 0.26 (0.17, 0.36) | 0.80 (0.42, 1.19)    | <0.001 |
|                              | 3.95 (2.10, 5.80)  | 4.57 (2.42, 7.12)  | 0.54 (0.40, 0.68)    | <0.001 | 0.67 (0.39, 1.00) | 0.76 (0.44, 1.08) | 0.44 (0.36, 0.52)    | <0.001 | 16.14 (7.30, 25.00)  | 13.32 (6.86, 20.00)  | -0.66 (-0.86, -0.46) | <0.001 | 0.23 (0.14, 0.32) | 0.19 (0.10, 0.28) | -0.66 (-0.86, -0.46) | <0.001 |
| 306                          |                    |                    |                      |        |                   |                   |                      |        |                      |                      |                      |        |                   |                   |                      |        |

|                             |                   |                    |                      |        |                   |                   |                      |        |                      |                      |                      |        |                   |                   |                      |        |
|-----------------------------|-------------------|--------------------|----------------------|--------|-------------------|-------------------|----------------------|--------|----------------------|----------------------|----------------------|--------|-------------------|-------------------|----------------------|--------|
| Africa                      | 6.20)             | 7.26)              | 0.68)                |        | 1.05)             | 1.17)             | 0.51)                |        | 30.86)               | 23.06)               | (-0.78, -0.54)       |        | (0.10, 0.43)      | (0.09, 0.32)      | (-0.79, -0.54)       |        |
| Central Latin America       | 3.51 (1.74, 5.88) | 4.85 (2.24, 8.18)  | 1.08 (1.02, 1.15)    | <0.001 | 0.51 (0.31, 0.78) | 0.66 (0.40, 1.02) | 0.85 (0.81, 0.89)    | <0.001 | 7.04 (5.41, 10.05)   | 7.91 (5.15, 10.56)   | 0.44 (0.16, 0.73)    | 0.002  | 0.10 (0.08, 0.14) | 0.11 (0.07, 0.15) | 0.44 (0.16, 0.73)    | 0.002  |
| Tropical Latin America      | 3.89 (2.08, 6.25) | 4.50 (2.05, 7.66)  | 0.50 (0.36, 0.64)    | <0.001 | 0.75 (0.43, 1.14) | 0.87 (0.50, 1.34) | 0.52 (0.45, 0.60)    | <0.001 | 19.90 (14.09, 26.83) | 16.71 (12.75, 29.04) | -0.61 (-1.06, -0.16) | 0.007  | 0.28 (0.20, 0.38) | 0.23 (0.18, 0.41) | -0.61 (-1.06, -0.16) | 0.007  |
| Central Sub-Saharan Africa  | 3.17 (1.66, 5.17) | 3.76 (1.92, 6.16)  | 0.61 (0.56, 0.66)    | <0.001 | 0.51 (0.29, 0.81) | 0.56 (0.32, 0.88) | 0.41 (0.33, 0.48)    | <0.001 | 10.95 (5.02, 24.96)  | 8.66 (3.90, 17.08)   | -0.86 (-1.17, -0.54) | <0.001 | 0.15 (0.07, 0.35) | 0.12 (0.05, 0.24) | -0.86 (-1.18, -0.54) | <0.001 |
| Western Europe              | 4.76 (2.31, 7.85) | 4.82 (2.32, 7.96)  | 0.04 (-0.05, 0.13)   | 0.392  | 0.75 (0.48, 1.08) | 0.68 (0.43, 1.01) | -0.35 (-0.41, -0.30) | <0.001 | 2.78 (2.05, 4.81)    | 3.18 (1.28, 4.37)    | 0.43 (0.15, 0.72)    | 0.003  | 0.04 (0.03, 0.07) | 0.04 (0.02, 0.06) | 0.45 (0.16, 0.74)    | 0.002  |
| High-income North America   | 5.35 (2.71, 8.76) | 3.92 (2.15, 6.25)  | -1.00 (-1.09, -0.91) | <0.001 | 0.88 (0.57, 1.23) | 0.75 (0.51, 1.04) | -0.50 (-0.56, -0.44) | <0.001 | 1.67 (1.29, 3.03)    | 2.45 (1.22, 3.10)    | 1.32 (0.63, 2.01)    | <0.001 | 0.02 (0.02, 0.04) | 0.03 (0.02, 0.04) | 1.38 (0.66, 2.10)    | <0.001 |
| Central Asia                | 2.84 (1.40, 4.80) | 3.44 (1.69, 5.68)  | 0.68 (0.61, 0.74)    | <0.001 | 0.28 (0.16, 0.45) | 0.34 (0.19, 0.53) | 0.64 (0.56, 0.71)    | <0.001 | 3.03 (1.87, 4.58)    | 4.81 (3.02, 6.86)    | 1.58 (1.04, 2.13)    | <0.001 | 0.04 (0.03, 0.06) | 0.07 (0.04, 0.10) | 1.58 (1.04, 2.13)    | <0.001 |
| Eastern Europe              | 4.29 (2.15, 6.98) | 6.21 (3.17, 10.16) | 1.29 (1.20, 1.38)    | <0.001 | 0.50 (0.31, 0.75) | 0.67 (0.41, 1.01) | 1.00 (0.91, 1.09)    | <0.001 | 8.43 (6.25, 11.75)   | 10.34 (6.59, 14.10)  | 0.76 (-0.06, 1.59)   | 0.068  | 0.12 (0.09, 0.16) | 0.14 (0.09, 0.20) | 0.77 (-0.06, 1.59)   | 0.067  |
| Southern Sub-Saharan Africa | 5.06 (2.73, 7.89) | 5.64 (3.05, 8.81)  | 0.36 (0.31, 0.42)    | <0.001 | 1.51 (0.81, 2.59) | 1.47 (0.80, 2.44) | -0.09 (-0.15, -0.02) | 0.008  | 16.12 (10.23, 23.88) | 14.72 (8.86, 21.98)  | -0.34 (-1.04, 0.37)  | 0.345  | 0.22 (0.14, 0.33) | 0.20 (0.12, 0.31) | -0.34 (-1.05, 0.38)  | 0.350  |
| High-income Asia Pacific    | 5.57 (2.83, 8.93) | 4.45 (2.18, 7.31)  | -0.78 (-0.83, -0.72) | <0.001 | 1.06 (0.68, 1.48) | 0.93 (0.59, 1.32) | -0.46 (-0.51, -0.42) | <0.001 | 6.33 (2.76, 11.65)   | 2.19 (1.09, 2.92)    | -3.56 (-4.07, -3.04) | <0.001 | 0.09 (0.04, 0.16) | 0.03 (0.01, 0.04) | -3.62 (-4.14, -3.09) | <0.001 |
| Central Europe              | 4.06 (1.99, 6.68) | 4.33 (2.17, 7.02)  | 0.21 (0.18, 0.24)    | <0.001 | 0.43 (0.26, 0.65) | 0.44 (0.27, 0.67) | 0.08 (0.06, 0.11)    | <0.001 | 3.74 (2.92, 5.64)    | 4.10 (2.06, 5.61)    | 0.39 (0.03, 0.74)    | 0.032  | 0.05 (0.04, 0.08) | 0.06 (0.03, 0.08) | 0.39 (0.04, 0.75)    | 0.031  |
| Andean Latin America        | 2.86 (1.47, 4.06) | 4.29 (2.18, 6.68)  | 1.41 (1.36, 1.46)    | <0.001 | 0.55 (0.33, 0.77) | 0.73 (0.43, 1.13) | 0.97 (0.95, 0.99)    | <0.001 | 16.56 (9.26, 23.86)  | 12.78 (7.48, 18.08)  | -0.87 (-1.17, -0.57) | <0.001 | 0.23 (0.18, 0.28) | 0.18 (0.13, 0.23) | -0.87 (-1.17, -0.57) | <0.001 |

|                    |                        |                   |                      |                      |                   |                   |                      |                      |                     |                      |                     |                      |                   |                   |                     |                      |
|--------------------|------------------------|-------------------|----------------------|----------------------|-------------------|-------------------|----------------------|----------------------|---------------------|----------------------|---------------------|----------------------|-------------------|-------------------|---------------------|----------------------|
| America            | 4.71)                  | 6.99)             | 1.47)                |                      | 0.84)             | 1.11)             | 1.00)                |                      | 28.15)              | 21.20)               | (-1.22, -0.51)      | (0.13, 0.39)         | (0.10, 0.30)      | (-1.22, -0.52)    |                     |                      |
| Caribbean          | 3.89 (1.97, 6.35)      | 5.90 (3.10, 9.41) | 1.46 (1.38, 1.54)    | <0.001               | 0.57 (0.35, 0.84) | 0.74 (0.47, 1.07) | 0.91 (0.87, 0.96)    | <0.001               | 10.78 (7.63, 15.39) | 12.93 (8.04, 21.75)  | 0.63 (0.10, 1.16)   | 0.020                | 0.15 (0.11, 0.22) | 0.18 (0.11, 0.30) | 0.63 (0.10, 1.17)   | 0.019                |
|                    | Southern Latin America | 3.12 (1.55, 5.35) | 5.34 (2.71, 8.75)    | 1.85 (1.73, 1.97)    | <0.001            | 0.69 (0.44, 1.00) | 0.86 (0.54, 1.24)    | 0.75 (0.71, 0.78)    | <0.001              | 6.25 (3.57, 9.70)    | 8.75 (5.43, 12.90)  | 1.13 (0.89, 1.37)    | <0.001            | 0.09 (0.05, 0.14) | 0.12 (0.08, 0.18)   | 1.14 (0.90, 1.38)    |
| Oceania            | 3.80 (1.96, 6.18)      | 4.39 (2.32, 6.96) | 0.53 (0.47, 0.58)    | <0.001               | 0.60 (0.38, 0.89) | 0.61 (0.38, 0.89) | 0.05 (-0.01, 0.11)   | 0.095                | 16.90 (9.14, 31.34) | 24.43 (11.94, 44.30) | 1.25 (0.96, 1.55)   | <0.001               | 0.24 (0.13, 0.44) | 0.34 (0.17, 0.62) | 1.26 (0.96, 1.55)   | <0.001               |
|                    | Australasia            | 4.09 (1.97, 6.85) | 3.84 (1.87, 6.41)    | -0.22 (-0.27, -0.17) | <0.001            | 0.65 (0.42, 0.93) | 0.55 (0.34, 0.79)    | -0.58 (-0.63, -0.54) | <0.001              | 3.98 (2.52, 7.11)    | 3.18 (1.59, 5.02)   | -0.78 (-1.38, -0.17) | 0.012             | 0.06 (0.03, 0.10) | 0.04 (0.02, 0.07)   | -0.77 (-1.38, -0.16) |
| <b>20-24 years</b> |                        |                   |                      |                      |                   |                   |                      |                      |                     |                      |                     |                      |                   |                   |                     |                      |
| <b>Women</b>       |                        |                   |                      |                      |                   |                   |                      |                      |                     |                      |                     |                      |                   |                   |                     |                      |
| Global             | 4.48 (2.39, 7.19)      | 4.17 (2.22, 6.64) | -0.23 (-0.28, -0.18) | <0.001               | 0.92 (0.59, 1.33) | 0.89 (0.56, 1.31) | -0.14 (-0.18, -0.10) | <0.001               | 10.03 (5.91, 13.24) | 9.61 (6.71, 12.19)   | -0.15 (-0.35, 0.05) | 0.140                | 0.15 (0.09, 0.20) | 0.14 (0.10, 0.18) | -0.15 (-0.35, 0.05) | 0.142                |
|                    | <b>SDI category</b>    |                   |                      |                      |                   |                   |                      |                      |                     |                      |                     |                      |                   |                   |                     |                      |
| High               | 5.08 (2.69, 8.05)      | 4.83 (2.73, 7.54) | -0.16 (-0.20, -0.13) | <0.001               | 2.10 (1.37, 3.03) | 1.96 (1.29, 2.82) | -0.21 (-0.29, -0.13) | <0.001               | 4.97 (3.67, 7.24)   | 5.22 (2.92, 6.28)    | 0.20 (-0.08, 0.49)  | 0.170                | 0.07 (0.05, 0.11) | 0.08 (0.04, 0.09) | 0.21 (-0.08, 0.51)  | 0.158                |
|                    | High-middle            | 5.34 (2.81, 8.59) | 4.90 (2.59, 7.78)    | -0.30 (-0.35, -0.26) | <0.001            | 0.89 (0.56, 1.29) | 0.95 (0.60, 1.37)    | 0.19 (0.15, 0.23)    | <0.001              | 7.89 (5.38, 9.99)    | 7.33 (5.19, 9.08)   | -0.29 (-0.78, 0.20)  | 0.245             | 0.12 (0.08, 0.15) | 0.11 (0.08, 0.14)   | -0.30 (-0.79, 0.20)  |
| Middle             |                        | 4.99 (2.67, 7.97) | 4.50 (2.39, 7.20)    | -0.34 (-0.40, -0.28) | <0.001            | 0.88 (0.54, 1.30) | 0.91 (0.56, 1.35)    | 0.14 (0.02, 0.27)    | 0.024               | 10.90 (7.23, 15.05)  | 10.25 (7.59, 13.76) | -0.21 (-0.44, 0.02)  | 0.080             | 0.16 (0.11, 0.22) | 0.15 (0.11, 0.21)   | -0.21 (-0.44, 0.02)  |
|                    | Low-middle             | 3.16 (1.68, 5.08) | 3.71 (1.95, 5.95)    | 0.59 (0.53, 0.66)    | <0.001            | 0.48 (0.29, 0.71) | 0.58 (0.35, 0.86)    | 0.68 (0.63, 0.73)    | <0.001              | 12.47 (5.65, 20.07)  | 11.25 (6.92, 16.78) | -0.38 (-0.82, 0.07)  | 0.097             | 0.19 (0.08, 0.30) | 0.17 (0.10, 0.25)   | -0.38 (-0.82, 0.07)  |
| Low                |                        | 2.77 (1.46, 4.08) | 3.31 (1.72, 4.90)    | 0.68 (0.54, 0.82)    | <0.001            | 0.57 (0.30, 0.84) | 0.66 (0.36, 0.96)    | 0.52 (0.49, 0.55)    | <0.001              | 12.87 (4.53, 21.21)  | 10.32 (6.01, 14.63) | -0.76 (-1.22, -0.30) | <0.001            | 0.19 (0.13, 0.25) | 0.15 (0.10, 0.20)   | -0.77 (-1.22, -0.30) |
| 308                |                        |                   |                      |                      |                   |                   |                      |                      |                     |                      |                     |                      |                   |                   |                     |                      |

|                                 | 4.45)                 | 5.42)                | 0.81)                   |        | 0.94)                | 1.08)                | 0.55)                      |        | 21.04)                  | 14.49)                  | (-0.94,<br>-0.58)          | (0.07,<br>0.32)         | (0.09,<br>0.22)         | (-0.95,<br>-0.59)          |        |
|---------------------------------|-----------------------|----------------------|-------------------------|--------|----------------------|----------------------|----------------------------|--------|-------------------------|-------------------------|----------------------------|-------------------------|-------------------------|----------------------------|--------|
| <b>21 GBD region</b>            |                       |                      |                         |        |                      |                      |                            |        |                         |                         |                            |                         |                         |                            |        |
| South Asia                      | 2.59 (1.32,<br>4.24)  | 3.55 (1.84,<br>5.72) | 1.15 (1.03,<br>1.27)    | <0.001 | 0.32 (0.20,<br>0.50) | 0.41 (0.25,<br>0.62) | 0.86 (0.77,<br>0.95)       | <0.001 | 10.89 (4.17,<br>19.99)  | 10.02 (5.08,<br>16.55)  | -0.37<br>(-1.02,<br>0.29)  | 0.16<br>(0.06,<br>0.30) | 0.15<br>(0.08,<br>0.25) | -0.37<br>(-1.03,<br>0.29)  | 0.273  |
|                                 |                       |                      |                         |        |                      |                      |                            |        |                         |                         |                            |                         |                         |                            |        |
| East Asia                       | 6.58 (3.46,<br>10.60) | 4.16 (2.06,<br>6.85) | -1.51 (-1.83,<br>-1.19) | <0.001 | 0.80 (0.50,<br>1.21) | 0.72 (0.43,<br>1.08) | -0.36<br>(-0.45,<br>-0.27) | <0.001 | 5.39 (2.52,<br>7.98)    | 2.22 (1.51,<br>3.34)    | -3.04<br>(-4.09,<br>-1.98) | 0.08<br>(0.04,<br>0.12) | 0.03<br>(0.02,<br>0.05) | -3.09<br>(-4.15,<br>-2.02) | <0.001 |
|                                 |                       |                      |                         |        |                      |                      |                            |        |                         |                         |                            |                         |                         |                            |        |
| North Africa and<br>Middle East | 3.51 (1.78,<br>5.83)  | 4.30 (2.19,<br>7.02) | 0.69 (0.65,<br>0.73)    | <0.001 | 0.60 (0.37,<br>0.87) | 0.67 (0.41,<br>0.97) | 0.38 (0.35,<br>0.40)       | <0.001 | 7.57 (4.83,<br>11.94)   | 5.15 (3.56,<br>7.63)    | -1.31<br>(-1.47,<br>-1.15) | 0.11<br>(0.07,<br>0.18) | 0.08<br>(0.05,<br>0.11) | -1.32<br>(-1.48,<br>-1.16) | <0.001 |
|                                 |                       |                      |                         |        |                      |                      |                            |        |                         |                         |                            |                         |                         |                            |        |
| Western<br>Sub-Saharan Africa   | 3.03 (1.58,<br>4.89)  | 3.36 (1.72,<br>5.52) | 0.43 (0.32,<br>0.53)    | <0.001 | 0.87 (0.43,<br>1.51) | 0.96 (0.48,<br>1.62) | 0.35 (0.24,<br>0.45)       | <0.001 | 14.34 (5.63,<br>23.50)  | 8.77 (5.45,<br>13.64)   | -1.68<br>(-1.80,<br>-1.56) | 0.21<br>(0.08,<br>0.35) | 0.13<br>(0.08,<br>0.20) | -1.70<br>(-1.82,<br>-1.58) | <0.001 |
|                                 |                       |                      |                         |        |                      |                      |                            |        |                         |                         |                            |                         |                         |                            |        |
| Southeast Asia                  | 4.50 (2.60,<br>6.88)  | 5.74 (3.34,<br>8.73) | 0.84 (0.81,<br>0.88)    | <0.001 | 1.44 (0.88,<br>2.15) | 1.53 (0.95,<br>2.26) | 0.20 (0.12,<br>0.27)       | <0.001 | 23.65 (14.64,<br>37.94) | 22.67 (15.37,<br>31.50) | -0.15<br>(-0.46,<br>0.17)  | 0.35<br>(0.22,<br>0.57) | 0.34<br>(0.23,<br>0.47) | -0.15<br>(-0.47,<br>0.17)  | 0.367  |
|                                 |                       |                      |                         |        |                      |                      |                            |        |                         |                         |                            |                         |                         |                            |        |
| Eastern Sub-Saharan<br>Africa   | 3.03 (1.66,<br>4.78)  | 3.22 (1.69,<br>5.26) | 0.26 (0.17,<br>0.34)    | <0.001 | 0.86 (0.42,<br>1.47) | 0.94 (0.47,<br>1.61) | 0.31 (0.26,<br>0.36)       | <0.001 | 18.50 (5.47,<br>33.07)  | 12.71 (5.99,<br>21.15)  | -1.32<br>(-1.57,<br>-1.07) | 0.28<br>(0.08,<br>0.50) | 0.19<br>(0.09,<br>0.32) | -1.33<br>(-1.58,<br>-1.08) | <0.001 |
|                                 |                       |                      |                         |        |                      |                      |                            |        |                         |                         |                            |                         |                         |                            |        |
| Central Latin<br>America        | 3.78 (1.96,<br>6.10)  | 4.42 (2.22,<br>7.32) | 0.54 (0.45,<br>0.64)    | <0.001 | 0.75 (0.46,<br>1.11) | 0.81 (0.49,<br>1.20) | 0.24 (0.21,<br>0.27)       | <0.001 | 6.78 (5.30,<br>10.36)   | 8.26 (5.34,<br>11.21)   | 0.77<br>(0.26,<br>1.28)    | 0.10<br>(0.08,<br>0.15) | 0.12<br>(0.08,<br>0.17) | 0.77 (0.26,<br>1.29)       | 0.003  |
|                                 |                       |                      |                         |        |                      |                      |                            |        |                         |                         |                            |                         |                         |                            |        |
| Tropical Latin<br>America       | 3.86 (2.06,<br>6.16)  | 4.57 (2.30,<br>7.45) | 0.58 (0.42,<br>0.74)    | <0.001 | 0.91 (0.52,<br>1.43) | 1.00 (0.59,<br>1.54) | 0.34 (0.31,<br>0.36)       | <0.001 | 18.31 (12.88,<br>27.79) | 15.71 (12.25,<br>26.02) | -0.52<br>(-0.89,<br>-0.14) | 0.27<br>(0.19,<br>0.42) | 0.23<br>(0.18,<br>0.39) | -0.52<br>(-0.90,<br>-0.14) | 0.007  |
|                                 |                       |                      |                         |        |                      |                      |                            |        |                         |                         |                            |                         |                         |                            |        |
| Central Sub-Saharan<br>Africa   | 2.46 (1.29,<br>3.98)  | 2.88 (1.47,<br>4.69) | 0.59 (0.46,<br>0.72)    | <0.001 | 0.82 (0.38,<br>1.45) | 0.86 (0.41,<br>1.57) | 0.17 (0.09,<br>0.25)       | <0.001 | 13.74 (3.97,<br>28.92)  | 11.42 (4.83,<br>22.74)  | -0.71<br>(-0.89,<br>-0.54) | 0.21<br>(0.06,<br>0.43) | 0.17<br>(0.07,<br>0.34) | -0.72<br>(-0.90,<br>-0.54) | <0.001 |
|                                 |                       |                      |                         |        |                      |                      |                            |        |                         |                         |                            |                         |                         |                            |        |
| Western Europe                  | 5.04 (2.69,<br>7.99)  | 5.27 (2.81,<br>8.36) | 0.14 (0.10,<br>0.19)    | <0.001 | 1.31 (0.88,<br>1.78) | 1.08 (0.72,<br>1.50) | -0.67<br>(-0.80,<br>-0.55) | <0.001 | 3.52 (2.54,<br>6.16)    | 3.96 (2.02,<br>4.94)    | 0.40<br>(0.03,<br>0.78)    | 0.05<br>(0.04,<br>0.09) | 0.06<br>(0.03,<br>0.07) | 0.43 (0.05,<br>0.82)       | 0.028  |
|                                 |                       |                      |                         |        |                      |                      |                            |        |                         |                         |                            |                         |                         |                            |        |

| Region                      | Q1          | Q2          | Q3            | Q4     | Q1          | Q2          | Q3          | Q4     | Q1            | Q2            | Q3      | Q4     | Q1     | Q2     | Q3           | Q4     |
|-----------------------------|-------------|-------------|---------------|--------|-------------|-------------|-------------|--------|---------------|---------------|---------|--------|--------|--------|--------------|--------|
| High-income North America   | 5.36 (2.82, | 4.48 (2.77, | -0.59 (-0.68, | <0.001 | 3.31 (2.01, | 3.11 (1.87, | -0.18       |        | 3.70 (2.82,   | 6.93 (3.17,   | 2.14    |        | 0.05   | 0.10   | 2.33 (1.62,  |        |
|                             | 8.54)       | 6.64)       | -0.50)        |        | 5.07)       | 4.81)       | (-0.27,     | <0.001 | 6.88)         | 8.70)         | (1.54,  | <0.001 | (0.04, | (0.04, | 3.05)        | <0.001 |
|                             |             |             |               |        |             |             | -0.09)      |        |               |               | 2.74)   |        | 0.10)  | 0.13)  |              |        |
| Central Asia                | 2.13 (1.03, | 2.70 (1.33, | 0.83 (0.79,   | <0.001 | 0.21 (0.12, | 0.25 (0.14, | 0.57 (0.54, |        | 3.63 (2.56,   | 5.13 (3.69,   | 1.17    |        | 0.05   | 0.08   | 1.17 (0.78,  |        |
|                             | 3.58)       | 4.44)       | 0.88)         |        | 0.34)       | 0.40)       | 0.59)       | <0.001 | 5.31)         | 7.88)         | (0.78,  | <0.001 | (0.04, | (0.06, | 1.56)        | <0.001 |
|                             |             |             |               |        |             |             |             |        |               |               | 1.56)   |        | 0.08)  | 0.12)  |              |        |
| Eastern Europe              | 4.30 (2.27, | 7.41 (4.27, | 1.93 (1.79,   | <0.001 | 0.53 (0.32, | 0.78 (0.48, | 1.31 (1.25, |        | 7.06 (4.84,   | 15.57 (5.96,  | 2.89    |        | 0.11   | 0.23   | 2.90 (1.75,  |        |
|                             | 6.91)       | 11.05)      | 2.06)         |        | 0.81)       | 1.15)       | 1.37)       | <0.001 | 9.66)         | 22.36)        | (1.74,  | <0.001 | (0.07, | (0.09, | 4.07)        | <0.001 |
|                             |             |             |               |        |             |             |             |        |               |               | 4.05)   |        | 0.14)  | 0.34)  |              |        |
| Southern Sub-Saharan Africa | 5.27 (3.06, | 4.62 (2.46, | -0.46 (-0.62, | <0.001 | 1.65 (0.84, | 1.45 (0.72, | -0.43       |        | 35.12 (18.06, | 13.73 (7.08,  | -3.10   |        | 0.53   | 0.20   | -3.12        |        |
|                             | 8.04)       | 7.41)       | -0.29)        |        | 2.78)       | 2.44)       | (-0.49,     | <0.001 | 50.31)        | 24.30)        | (-4.45, | <0.001 | (0.27, | (0.10, | (-4.48,      | <0.001 |
|                             |             |             |               |        |             |             | -0.37)      |        |               |               | -1.73)  |        | 0.76)  | 0.36)  | (-1.74)      |        |
| High-income Asia Pacific    | 5.11 (2.74, | 4.66 (2.46, | -0.33 (-0.35, | <0.001 | 1.98 (1.21, | 1.73 (1.08, | -0.48       |        | 8.34 (4.91,   | 3.24 (2.47,   | -3.25   |        | 0.12   | 0.05   | -3.33        |        |
|                             | 8.15)       | 7.44)       | -0.31)        |        | 2.95)       | 2.55)       | (-0.51,     | <0.001 | 12.56)        | 4.93)         | (-3.84, | <0.001 | (0.07, | (0.03, | (-3.94,      | <0.001 |
|                             |             |             |               |        |             |             | -0.45)      |        |               |               | -2.65)  |        | 0.19)  | 0.07)  | (-2.72)      |        |
| Central Europe              | 3.69 (1.90, | 4.19 (2.21, | 0.44 (0.40,   | <0.001 | 0.52 (0.32, | 0.54 (0.33, | 0.14 (0.10, |        | 3.88 (3.04,   | 4.60 (2.35,   | 0.52    |        | 0.06   | 0.07   | 0.53 (0.15,  |        |
|                             | 6.05)       | 6.81)       | 0.49)         |        | 0.76)       | 0.81)       | 0.17)       | <0.001 | 5.94)         | 6.15)         | (0.15,  | 0.005  | (0.05, | (0.03, | 0.90)        | 0.005  |
|                             |             |             |               |        |             |             |             |        |               |               | 0.90)   |        | 0.09)  | 0.09)  |              |        |
| Andean Latin America        | 2.54 (1.32, | 4.39 (2.35, | 1.91 (1.89,   | <0.001 | 0.45 (0.28, | 0.64 (0.39, | 1.18 (1.15, |        | 12.00 (6.59,  | 7.62 (4.57,   | -1.68   |        | 0.18   | 0.11   | -1.69        |        |
|                             | 4.11)       | 6.95)       | 1.94)         |        | 0.67)       | 0.93)       | 1.20)       | <0.001 | 19.86)        | 12.25)        | (-2.60, | <0.001 | (0.10, | (0.07, | (-2.62,      | <0.001 |
|                             |             |             |               |        |             |             |             |        |               |               | -0.74)  |        | 0.30)  | 0.18)  | (-0.75)      |        |
| Caribbean                   | 4.15 (2.26, | 6.91 (4.01, | 1.78 (1.75,   | <0.001 | 0.77 (0.48, | 0.96 (0.62, | 0.80 (0.74, |        | 18.93 (12.46, | 25.24 (14.82, | 1.02    |        | 0.28   | 0.38   | 1.02 (0.71,  |        |
|                             | 6.58)       | 10.37)      | 1.80)         |        | 1.12)       | 1.39)       | 0.85)       | <0.001 | 30.11)        | 45.59)        | (0.71,  | <0.001 | (0.19, | (0.22, | 1.33)        | <0.001 |
|                             |             |             |               |        |             |             |             |        |               |               | 1.33)   |        | 0.45)  | 0.68)  |              |        |
| Southern Latin America      | 3.24 (1.67, | 5.70 (3.00, | 1.98 (1.94,   | <0.001 | 1.21 (0.77, | 1.29 (0.82, | 0.22 (0.17, |        | 8.78 (5.44,   | 9.82 (6.44,   | 0.47    |        | 0.13   | 0.15   | 0.47 (0.14,  |        |
|                             | 5.26)       | 8.97)       | 2.02)         |        | 1.75)       | 1.88)       | 0.26)       | <0.001 | 14.25)        | 15.90)        | (0.14,  | 0.005  | (0.08, | (0.10, | 0.80)        | 0.005  |
|                             |             |             |               |        |             |             |             |        |               |               | 0.79)   |        | 0.21)  | 0.24)  |              |        |
| Oceania                     | 4.98 (2.86, | 6.10 (3.76, | 0.70 (0.68,   | <0.001 | 0.77 (0.51, | 0.79 (0.52, | 0.08 (0.03, |        | 32.64 (18.14, | 44.84 (22.16, | 1.12    |        | 0.49   | 0.67   | 1.12 (0.76,  |        |
|                             | 7.54)       | 9.17)       | 0.73)         |        | 1.11)       | 1.16)       | 0.13)       | 0.002  | 57.30)        | 79.98)        | (0.75,  | <0.001 | (0.27, | (0.33, | 1.49)        | <0.001 |
|                             |             |             |               |        |             |             |             |        |               |               | 1.49)   |        | 0.86)  | 1.20)  |              |        |
| Australasia                 | 4.46 (2.35, | 4.73 (2.42, | 0.20 (0.08,   | 0.001  | 1.36 (0.94, | 1.10 (0.73, | -0.75       |        | 4.49 (2.92,   | 4.75 (2.07,   | 0.24    |        | 0.07   | 0.07   | 0.27 (-0.67, |        |
|                             | 7.18)       | 7.56)       | 0.31)         |        | 1.88)       | 1.53)       | (-0.78,     | <0.001 | 7.21)         | 7.38)         | (-0.68, | 0.610  | (0.04, | (0.03, | 1.22)        | 0.576  |
|                             |             |             |               |        |             |             | -0.72)      |        |               |               | 1.18)   |        | 0.11)  | 0.11)  |              |        |

| Men                          |                    |                    |                      |        |                   |                   |                      |        |                      |                      |                      |        |                   |                   |                      |        |
|------------------------------|--------------------|--------------------|----------------------|--------|-------------------|-------------------|----------------------|--------|----------------------|----------------------|----------------------|--------|-------------------|-------------------|----------------------|--------|
| Global                       | 5.03 (2.68, 7.97)  | 5.02 (2.74, 7.86)  | 0.01 (-0.04, 0.05)   | 0.724  | 0.85 (0.54, 1.22) | 0.86 (0.55, 1.25) | 0.07 (0.03, 0.11)    | <0.001 | 12.76 (9.52, 15.89)  | 12.99 (9.96, 16.84)  | 0.05 (-0.16, 0.25)   | 0.657  | 0.19 (0.14, 0.24) | 0.19 (0.15, 0.25) | 0.05 (-0.15, 0.25)   | 0.645  |
| <b>SDI category</b>          |                    |                    |                      |        |                   |                   |                      |        |                      |                      |                      |        |                   |                   |                      |        |
| High                         | 5.79 (3.10, 9.26)  | 5.67 (3.27, 8.68)  | -0.08 (-0.12, -0.04) | <0.001 | 1.45 (0.97, 2.03) | 1.44 (0.96, 1.99) | -0.03 (-0.08, 0.02)  | 0.245  | 6.60 (5.00, 9.44)    | 7.19 (3.87, 8.86)    | 0.34 (-0.09, 0.78)   | 0.117  | 0.10 (0.07, 0.14) | 0.11 (0.06, 0.13) | 0.35 (-0.08, 0.79)   | 0.112  |
| High-middle                  | 6.07 (3.36, 9.59)  | 5.87 (3.26, 8.98)  | -0.12 (-0.16, -0.07) | <0.001 | 0.93 (0.60, 1.34) | 1.01 (0.66, 1.43) | 0.30 (0.27, 0.33)    | <0.001 | 14.98 (10.69, 18.70) | 12.91 (10.11, 15.89) | -0.49 (-1.21, 0.23)  | 0.185  | 0.22 (0.16, 0.28) | 0.19 (0.15, 0.24) | -0.49 (-1.21, 0.24)  | 0.185  |
| Middle                       | 5.31 (2.80, 8.49)  | 5.24 (2.83, 8.22)  | -0.04 (-0.08, -0.01) | 0.010  | 0.86 (0.53, 1.25) | 0.93 (0.58, 1.37) | 0.29 (0.23, 0.34)    | <0.001 | 13.81 (10.70, 19.11) | 14.61 (11.48, 19.74) | 0.22 (-0.02, 0.46)   | 0.071  | 0.21 (0.16, 0.29) | 0.22 (0.17, 0.30) | 0.22 (-0.02, 0.46)   | 0.069  |
| Low-middle                   | 3.66 (1.92, 5.94)  | 4.42 (2.35, 7.05)  | 0.67 (0.58, 0.76)    | <0.001 | 0.48 (0.30, 0.72) | 0.59 (0.36, 0.88) | 0.72 (0.64, 0.80)    | <0.001 | 11.78 (7.99, 15.29)  | 12.30 (8.91, 16.79)  | 0.17 (-0.11, 0.46)   | 0.235  | 0.18 (0.12, 0.23) | 0.18 (0.13, 0.25) | 0.17 (-0.11, 0.46)   | 0.235  |
| Low                          | 3.54 (1.91, 5.62)  | 4.39 (2.34, 6.90)  | 0.78 (0.69, 0.87)    | <0.001 | 0.56 (0.32, 0.88) | 0.67 (0.39, 1.06) | 0.69 (0.64, 0.74)    | <0.001 | 14.83 (8.22, 24.28)  | 14.85 (9.64, 21.96)  | 0.01 (-0.14, 0.16)   | 0.889  | 0.22 (0.12, 0.36) | 0.22 (0.14, 0.33) | 0.01 (-0.14, 0.16)   | 0.894  |
| <b>21 GBD region</b>         |                    |                    |                      |        |                   |                   |                      |        |                      |                      |                      |        |                   |                   |                      |        |
| South Asia                   | 3.04 (1.55, 5.00)  | 4.12 (2.14, 6.70)  | 1.07 (0.94, 1.20)    | <0.001 | 0.31 (0.19, 0.49) | 0.41 (0.24, 0.64) | 0.94 (0.86, 1.01)    | <0.001 | 8.35 (5.41, 11.44)   | 9.03 (6.01, 12.84)   | 0.28 (-0.33, 0.89)   | 0.366  | 0.13 (0.08, 0.17) | 0.14 (0.09, 0.19) | 0.28 (-0.32, 0.89)   | 0.360  |
| East Asia                    | 6.72 (3.51, 10.76) | 4.35 (2.23, 7.08)  | -1.45 (-1.71, -1.20) | <0.001 | 0.89 (0.55, 1.32) | 0.84 (0.51, 1.26) | -0.17 (-0.27, -0.07) | 0.001  | 11.82 (5.71, 16.51)  | 5.97 (4.28, 8.18)    | -2.23 (-2.54, -1.91) | <0.001 | 0.18 (0.08, 0.25) | 0.09 (0.06, 0.12) | -2.24 (-2.56, -1.92) | <0.001 |
| North Africa and Middle East | 5.56 (2.98, 8.86)  | 6.77 (3.57, 10.71) | 0.68 (0.66, 0.70)    | <0.001 | 0.93 (0.60, 1.32) | 1.07 (0.69, 1.53) | 0.48 (0.45, 0.52)    | <0.001 | 13.52 (8.70, 21.95)  | 10.84 (6.92, 16.67)  | -0.72 (-0.88, -0.55) | <0.001 | 0.20 (0.13, 0.33) | 0.16 (0.10, 0.25) | -0.72 (-0.89, -0.56) | <0.001 |
| Western Sub-Saharan Africa   | 3.89 (2.07, 6.25)  | 4.49 (2.34, 7.18)  | 0.55 (0.42, 0.68)    | <0.001 | 0.92 (0.48, 1.54) | 1.01 (0.54, 1.69) | 0.33 (0.25, 0.41)    | <0.001 | 19.01 (10.29, 30.73) | 16.44 (10.63, 24.74) | -0.51 (-0.66, -0.36) | <0.001 | 0.28 (0.15, 0.46) | 0.25 (0.16, 0.37) | -0.52 (-0.67, -0.36) | <0.001 |

|                             | 2010              | 2011               | 2012                 | 2013   | 2014              | 2015              | 2016                 | 2017   | 2018                 | 2019                 | 2020                 | 2021   | 2022              | 2023              | 2024                 |        |
|-----------------------------|-------------------|--------------------|----------------------|--------|-------------------|-------------------|----------------------|--------|----------------------|----------------------|----------------------|--------|-------------------|-------------------|----------------------|--------|
| Southeast Asia              | 4.66 (2.72, 7.11) | 5.87 (3.45, 8.80)  | 0.80 (0.77, 0.83)    | <0.001 | 1.23 (0.77, 1.77) | 1.36 (0.88, 1.93) | 0.35 (0.31, 0.40)    | <0.001 | 26.11 (17.91, 43.98) | 29.82 (21.70, 42.32) | 0.51 (0.35, 0.67)    | <0.001 | 0.39 (0.27, 0.66) | 0.45 (0.32, 0.63) | 0.51 (0.35, 0.67)    | <0.001 |
| Eastern Sub-Saharan Africa  | 4.18 (2.40, 6.43) | 4.72 (2.63, 7.30)  | 0.47 (0.39, 0.55)    | <0.001 | 0.83 (0.45, 1.34) | 0.92 (0.50, 1.49) | 0.39 (0.35, 0.42)    | <0.001 | 22.47 (11.21, 41.62) | 20.38 (11.51, 33.59) | -0.34 (-0.49, -0.18) | <0.001 | 0.34 (0.17, 0.62) | 0.31 (0.17, 0.50) | -0.34 (-0.49, -0.18) | <0.001 |
| Central Latin America       | 3.94 (2.04, 6.38) | 5.70 (2.88, 9.36)  | 1.25 (1.20, 1.30)    | <0.001 | 0.65 (0.41, 0.97) | 0.83 (0.51, 1.23) | 0.80 (0.77, 0.84)    | <0.001 | 9.77 (7.64, 14.21)   | 12.25 (7.34, 16.07)  | 0.80 (0.54, 1.07)    | <0.001 | 0.15 (0.11, 0.21) | 0.18 (0.11, 0.24) | 0.80 (0.54, 1.07)    | <0.001 |
| Tropical Latin America      | 4.47 (2.53, 6.91) | 5.81 (2.99, 9.35)  | 0.89 (0.81, 0.97)    | <0.001 | 0.75 (0.45, 1.14) | 0.91 (0.55, 1.35) | 0.67 (0.64, 0.69)    | <0.001 | 25.69 (18.43, 33.52) | 21.16 (16.68, 34.02) | -0.67 (-1.02, -0.31) | <0.001 | 0.39 (0.28, 0.50) | 0.32 (0.25, 0.51) | -0.67 (-1.03, -0.32) | <0.001 |
| Central Sub-Saharan Africa  | 3.11 (1.63, 5.01) | 3.69 (1.94, 6.00)  | 0.64 (0.45, 0.82)    | <0.001 | 0.65 (0.35, 1.09) | 0.72 (0.38, 1.19) | 0.34 (0.26, 0.41)    | <0.001 | 16.59 (8.00, 33.55)  | 15.26 (7.75, 28.83)  | -0.38 (-0.56, -0.20) | <0.001 | 0.25 (0.12, 0.50) | 0.23 (0.12, 0.43) | -0.38 (-0.56, -0.20) | <0.001 |
| Western Europe              | 5.78 (3.12, 9.17) | 6.12 (3.34, 9.61)  | 0.20 (0.12, 0.27)    | <0.001 | 1.12 (0.76, 1.52) | 1.00 (0.67, 1.40) | -0.39 (-0.42, -0.36) | <0.001 | 5.51 (4.07, 9.67)    | 6.63 (2.97, 8.66)    | 0.58 (0.28, 0.89)    | <0.001 | 0.08 (0.06, 0.14) | 0.10 (0.04, 0.13) | 0.60 (0.29, 0.91)    | <0.001 |
| High-income North America   | 5.80 (3.05, 9.34) | 5.10 (3.16, 7.48)  | -0.41 (-0.47, -0.35) | <0.001 | 1.89 (1.20, 2.81) | 1.94 (1.21, 2.93) | 0.12 (-0.01, 0.25)   | 0.073  | 4.20 (3.28, 7.59)    | 7.93 (3.60, 10.02)   | 2.32 (1.80, 2.83)    | <0.001 | 0.06 (0.05, 0.11) | 0.12 (0.05, 0.15) | 2.38 (1.86, 2.90)    | <0.001 |
| Central Asia                | 3.10 (1.59, 5.15) | 3.76 (1.97, 6.11)  | 0.69 (0.62, 0.76)    | <0.001 | 0.32 (0.19, 0.50) | 0.38 (0.22, 0.59) | 0.61 (0.55, 0.68)    | <0.001 | 6.25 (4.43, 9.23)    | 9.38 (6.58, 14.62)   | 1.42 (0.94, 1.91)    | <0.001 | 0.09 (0.07, 0.14) | 0.14 (0.10, 0.22) | 1.43 (0.94, 1.92)    | <0.001 |
| Eastern Europe              | 5.10 (2.86, 7.91) | 9.40 (5.76, 13.79) | 2.13 (1.95, 2.31)    | <0.001 | 0.56 (0.35, 0.83) | 0.89 (0.58, 1.30) | 1.61 (1.48, 1.73)    | <0.001 | 16.88 (13.59, 27.83) | 32.77 (20.59, 43.38) | 2.42 (0.73, 4.14)    | 0.005  | 0.25 (0.20, 0.42) | 0.49 (0.31, 0.65) | 2.43 (0.74, 4.14)    | 0.005  |
| Southern Sub-Saharan Africa | 5.24 (2.97, 8.21) | 5.72 (3.23, 8.96)  | 0.32 (0.25, 0.39)    | <0.001 | 1.47 (0.75, 2.50) | 1.44 (0.76, 2.41) | -0.07 (-0.10, -0.03) | <0.001 | 23.30 (15.34, 35.54) | 25.48 (17.65, 35.28) | 0.31 (-0.07, 0.70)   | 0.114  | 0.35 (0.23, 0.53) | 0.38 (0.26, 0.53) | 0.31 (-0.08, 0.70)   | 0.118  |
| High-income Asia Pacific    | 6.32 (3.42, 9.94) | 5.40 (2.97, 8.41)  | -0.54 (-0.58, -0.51) | <0.001 | 1.53 (0.99, 2.17) | 1.35 (0.88, 1.93) | -0.45 (-0.48, -0.42) | <0.001 | 8.74 (5.82, 12.93)   | 5.10 (3.07, 6.80)    | -1.83 (-2.38, -1.28) | <0.001 | 0.13 (0.09, 0.19) | 0.08 (0.04, 0.10) | -1.85 (-2.42, -1.28) | <0.001 |



|                        | 2010        | 2015        | 2020          | 2025   | 2030        | 2035        | 2040        | 2045   | 2050          | 2055          | 2060    | 2065   | 2070   | 2075         | 2080   |        |
|------------------------|-------------|-------------|---------------|--------|-------------|-------------|-------------|--------|---------------|---------------|---------|--------|--------|--------------|--------|--------|
| Central Europe         | 4.57 (2.41, | 5.33 (3.01, | 0.54 (0.49,   | <0.001 | 0.63 (0.41, | 0.70 (0.47, | 0.33 (0.29, | <0.001 | 7.76 (6.07,   | 9.75 (4.97,   | 0.72    | 0.12   | 0.15   | 0.72 (0.38,  | <0.001 |        |
|                        | 7.37)       | 8.23)       | 0.58)         |        | 0.92)       | 0.99)       | 0.38)       |        | 11.35)        | 12.98)        | 1.06)   | <0.001 | (0.09, | (0.07,       | 1.07)  | <0.001 |
| Andean Latin America   | 3.33 (1.81, | 5.30 (2.94, | 1.63 (1.59,   | <0.001 | 0.56 (0.35, | 0.77 (0.49, | 1.11 (1.08, | <0.001 | 19.99 (11.73, | 16.00 (9.77,  | -0.58   | 0.30   | 0.24   | -0.59        | 0.008  |        |
|                        | 5.26)       | 8.30)       | 1.66)         |        | 0.82)       | 1.13)       | 1.14)       |        | 31.21)        | 25.31)        | (-1.01, | (0.18, | (0.15, | (-1.01,      | 0.008  |        |
| Caribbean              | 4.38 (2.37, | 6.95 (3.96, | 1.62 (1.56,   | <0.001 | 0.63 (0.40, | 0.83 (0.54, | 0.93 (0.90, | <0.001 | 14.27 (10.31, | 18.01 (11.94, | 0.85    | 0.21   | 0.27   | 0.85 (0.37,  | 0.001  |        |
|                        | 6.87)       | 10.72)      | 1.68)         |        | 0.92)       | 1.19)       | 0.96)       |        | 19.39)        | 26.72)        | (0.37,  | (0.15, | (0.18, | 1.34)        | 0.001  |        |
| Southern Latin America | 3.65 (1.95, | 6.43 (3.55, | 1.97 (1.89,   | <0.001 | 0.97 (0.64, | 1.14 (0.75, | 0.57 (0.53, | <0.001 | 9.84 (6.08,   | 13.57 (8.99,  | 1.17    | 0.15   | 0.20   | 1.18 (0.83,  | <0.001 |        |
|                        | 5.95)       | 10.35)      | 2.05)         |        | 1.33)       | 1.59)       | 0.61)       |        | 15.30)        | 19.49)        | (0.83,  | (0.09, | (0.13, | 1.53)        | <0.001 |        |
| Oceania                | 3.80 (2.05, | 4.53 (2.48, | 0.62 (0.58,   | <0.001 | 0.33 (0.19, | 0.38 (0.22, | 0.50 (0.46, | <0.001 | 5.28 (2.94,   | 6.96 (3.71,   | 0.91    | 0.08   | 0.10   | 0.91 (0.64,  | <0.001 |        |
|                        | 6.15)       | 7.04)       | 0.67)         |        | 0.52)       | 0.59)       | 0.55)       |        | 10.00)        | 12.16)        | (0.63,  | (0.04, | (0.06, | 1.18)        | <0.001 |        |
| Australasia            | 4.96 (2.64, | 5.01 (2.74, | 0.02 (-0.03,  | 0.420  | 0.93 (0.63, | 0.78 (0.53, | -0.59       | <0.001 | 5.91 (3.84,   | 6.31 (2.58,   | 0.28    | 0.09   | 0.09   | 0.29 (-0.21, | 0.251  |        |
|                        | 7.90)       | 7.83)       | 0.08)         |        | 1.25)       | 1.06)       | (-0.62,     |        | 8.91)         | 10.12)        | (-0.22, | (0.06, | (0.04, | 0.80)        | 0.251  |        |
|                        |             |             |               |        |             |             |             |        |               |               |         |        |        |              |        |        |
| <b>25-29 years</b>     |             |             |               |        |             |             |             |        |               |               |         |        |        |              |        |        |
| <b>Women</b>           |             |             |               |        |             |             |             |        |               |               |         |        |        |              |        |        |
| Global                 | 5.07 (2.55, | 5.00 (2.48, | -0.04 (-0.08, | 0.094  | 1.20 (0.83, | 1.11 (0.76, | -0.23       | <0.001 | 13.70 (8.56,  | 12.58 (9.17,  | -0.29   | 0.22   | 0.20   | -0.29        | 0.034  |        |
|                        | 8.25)       | 8.26)       | 0.01)         |        | 1.69)       | 1.59)       | (-0.30,     |        | 18.51)        | 16.73)        | (-0.56, | (0.14, | (0.15, | (-0.57,      | 0.034  |        |
|                        |             |             |               |        |             |             |             |        |               |               |         |        |        |              |        |        |
| <b>SDI category</b>    |             |             |               |        |             |             |             |        |               |               |         |        |        |              |        |        |
| High                   | 6.01 (2.90, | 5.74 (2.99, | -0.16 (-0.19, | <0.001 | 3.01 (2.08, | 2.84 (1.93, | -0.16       | <0.001 | 6.69 (4.98,   | 8.27 (4.20,   | 0.78    | 0.10   | 0.13   | 0.80 (0.36,  | <0.001 |        |
|                        | 9.83)       | 9.19)       | -0.13)        |        | 4.22)       | 4.05)       | (-0.25,     |        | 10.20)        | 10.31)        | (0.43,  | (0.08, | (0.06, | 1.24)        | <0.001 |        |
| High-middle            | 5.91 (2.92, | 6.06 (2.99, | 0.07 (0.01,   | 0.016  | 1.02 (0.70, | 1.13 (0.76, | 0.34 (0.32, | <0.001 | 10.34 (7.55,  | 10.25 (6.92,  | -0.16   | 0.17   | 0.17   | -0.16        | 0.736  |        |
|                        | 9.71)       | 9.93)       | 0.13)         |        | 1.41)       | 1.58)       | 0.36)       |        | 13.32)        | 12.63)        | (-1.10, | (0.12, | (0.11, | (-1.10,      | 0.736  |        |
| Middle                 | 5.54 (2.81, | 5.33 (2.65, | -0.12 (-0.17, | <0.001 | 1.05 (0.69, | 1.06 (0.70, | 0.04 (0.00, | 0.035  | 16.34 (11.27, | 13.66 (10.39, | -0.66   | 0.26   | 0.22   | -0.66        | <0.001 |        |
|                        | 8.98)       | 8.76)       | -0.07)        |        | 1.49)       | 1.51)       | 0.07)       |        | 23.98)        | 20.36)        | (-1.00, | (0.18, | (0.17, | (-1.00,      | <0.001 |        |
|                        |             |             |               |        |             |             |             |        |               |               |         |        |        |              |        |        |

|                                 |             |             |               |        |             |             |             |        |               |               |         |        |        |        |              |        |
|---------------------------------|-------------|-------------|---------------|--------|-------------|-------------|-------------|--------|---------------|---------------|---------|--------|--------|--------|--------------|--------|
| Low-middle                      | 3.50 (1.75, | 4.29 (2.09, | 0.70 (0.61,   | <0.001 | 0.52 (0.33, | 0.65 (0.41, | 0.76 (0.71, | <0.001 | 15.87 (7.25,  | 14.15 (9.02,  | -0.39   | 0.041  | 0.26   | 0.23   | -0.39        | 0.040  |
|                                 | 5.77)       | 7.14)       | 0.79)         |        | 0.76)       | 0.95)       | 0.81)       |        | 24.71)        | 20.85)        | (-0.77, |        | (0.12, | (0.15, | (-0.77,      |        |
| Low                             | 3.00 (1.51, | 3.61 (1.77, | 0.68 (0.59,   | <0.001 | 0.59 (0.34, | 0.70 (0.40, | 0.57 (0.53, | <0.001 | 19.22 (6.44,  | 13.50 (8.04,  | -1.23   | <0.001 | 0.31   | 0.22   | -1.23        | <0.001 |
|                                 | 4.94)       | 5.99)       | 0.78)         |        | 0.97)       | 1.15)       | 0.60)       |        | 31.40)        | 19.16)        | (-1.41, |        | (0.10, | (0.13, | (-1.42,      |        |
| <b>21 GBD region</b>            |             |             |               |        |             |             |             |        |               |               |         |        |        |        |              |        |
| South Asia                      | 2.85 (1.37, | 3.97 (1.92, | 1.20 (1.09,   | <0.001 | 0.35 (0.21, | 0.45 (0.28, | 0.96 (0.87, | <0.001 | 11.55 (5.04,  | 11.73 (6.67,  | 0.13    | 0.725  | 0.19   | 0.19   | 0.13 (-0.60, | 0.724  |
|                                 | 4.81)       | 6.64)       | 1.32)         |        | 0.50)       | 0.65)       | 1.04)       |        | 20.82)        | 18.16)        | (-0.60, |        | (0.08, | (0.11, | 0.88)        |        |
| East Asia                       | 7.11 (3.52, | 4.94 (2.28, | -1.24 (-1.35, | <0.001 | 0.92 (0.59, | 0.86 (0.56, | -0.20       | 0.001  | 6.78 (3.24,   | 2.71 (1.82,   | -3.04   | <0.001 | 0.11   | 0.04   | -3.09        | <0.001 |
|                                 | 11.53)      | 8.35)       | -1.13)        |        | 1.30)       | 1.23)       | (-0.31,     |        | 9.70)         | 4.17)         | (-4.24, |        | (0.05, | (0.03, | (-4.30,      |        |
| North Africa and<br>Middle East | 3.93 (1.87, | 4.99 (2.36, | 0.82 (0.81,   | <0.001 | 0.74 (0.49, | 0.83 (0.55, | 0.34 (0.28, | <0.001 | 9.30 (5.45,   | 7.56 (4.76,   | -0.71   | <0.001 | 0.15   | 0.12   | -0.71        | <0.001 |
|                                 | 6.64)       | 8.18)       | 0.83)         |        | 1.05)       | 1.16)       | 0.41)       |        | 15.42)        | 11.31)        | (-0.84, |        | (0.09, | (0.08, | (-0.84,      |        |
| Western<br>Sub-Saharan Africa   | 3.33 (1.69, | 3.61 (1.78, | 0.33 (0.23,   | <0.001 | 1.07 (0.56, | 1.19 (0.62, | 0.40 (0.33, | <0.001 | 27.57 (10.73, | 15.62 (9.91,  | -1.94   | <0.001 | 0.45   | 0.25   | -1.95        | <0.001 |
|                                 | 5.44)       | 6.01)       | 0.43)         |        | 1.88)       | 2.13)       | 0.46)       |        | 44.83)        | 24.18)        | (-2.06, |        | (0.17, | (0.16, | (-2.07,      |        |
| Southeast Asia                  | 5.61 (3.10, | 7.21 (3.88, | 0.87 (0.85,   | <0.001 | 1.97 (1.19, | 2.04 (1.31, | 0.13 (0.10, | <0.001 | 39.18 (25.89, | 35.08 (25.41, | -0.39   | 0.044  | 0.63   | 0.57   | -0.39        | 0.044  |
|                                 | 8.66)       | 11.18)      | 0.88)         |        | 2.92)       | 2.95)       | 0.15)       |        | 64.42)        | 54.60)        | (-0.76, |        | (0.42, | (0.41, | (-0.76,      |        |
| Eastern Sub-Saharan<br>Africa   | 3.25 (1.77, | 3.36 (1.69, | 0.16 (0.08,   | <0.001 | 0.83 (0.45, | 0.92 (0.50, | 0.36 (0.33, | <0.001 | 28.68 (7.99,  | 17.01 (8.27,  | -1.78   | <0.001 | 0.46   | 0.27   | -1.79        | <0.001 |
|                                 | 5.10)       | 5.58)       | 0.25)         |        | 1.44)       | 1.61)       | 0.39)       |        | 51.66)        | 26.81)        | (-2.02, |        | (0.13, | (0.13, | (-2.02,      |        |
| Central Latin<br>America        | 4.50 (2.16, | 5.46 (2.54, | 0.68 (0.60,   | <0.001 | 0.88 (0.57, | 0.95 (0.61, | 0.28 (0.26, | <0.001 | 8.76 (6.85,   | 10.41 (6.67,  | 0.74    | 0.076  | 0.14   | 0.17   | 0.75 (-0.08, | 0.076  |
|                                 | 7.52)       | 9.14)       | 0.76)         |        | 1.27)       | 1.38)       | 0.31)       |        | 13.72)        | 14.08)        | (-0.08, |        | (0.11, | (0.11, | 1.58)        |        |
| Tropical Latin<br>America       | 4.39 (2.16, | 6.49 (2.82, | 1.31 (1.19,   | <0.001 | 0.92 (0.58, | 1.12 (0.70, | 0.64 (0.55, | <0.001 | 21.91 (15.67, | 17.66 (13.76, | -0.71   | <0.001 | 0.35   | 0.29   | -0.72        | <0.001 |
|                                 | 7.20)       | 11.17)      | 1.44)         |        | 1.39)       | 1.67)       | 0.73)       |        | 34.94)        | 28.97)        | (-1.04, |        | (0.25, | (0.22, | (-1.05,      |        |
| Central Sub-Saharan<br>Africa   | 2.54 (1.25, | 3.00 (1.45, | 0.62 (0.53,   | <0.001 | 0.71 (0.35, | 0.76 (0.40, | 0.25 (0.21, | <0.001 | 14.47 (4.17,  | 11.04 (4.58,  | -0.96   | <0.001 | 0.23   | 0.18   | -0.97        | <0.001 |
|                                 | 4.06)       | 4.99)       | 0.72)         |        | 1.25)       | 1.33)       | 0.29)       |        | 29.07)        | 21.04)        | (-1.20, |        | (0.07, | (0.07, | (-1.20,      |        |
| 314                             |             |             |               |        |             |             |             |        |               |               |         |        |        |        |              |        |

|                             |                           | Economic Indicators |                      |                      | Demographic & Social Factors |                                 |                      |                         | Health & Well-being       |                      |                                  | Environmental & Quality of Life |                   |                      |                               |
|-----------------------------|---------------------------|---------------------|----------------------|----------------------|------------------------------|---------------------------------|----------------------|-------------------------|---------------------------|----------------------|----------------------------------|---------------------------------|-------------------|----------------------|-------------------------------|
| Region                      | GDP (Bn USD)              | Unemployment (%)    | Inflation (%)        | Population (Bn)      | Life Expectancy (Years)      | Healthcare Expenditure (Bn USD) | Urbanization (%)     | Human Development Index | CO2 Emissions (kg/capita) | PM2.5 (µg/m³)        | Greenhouse Gas Emissions (Bn kg) | Water Quality Index             | Forest Cover (%)  | Renewable Energy (%) | Overall Quality of Life Index |
| Western Europe              | 6.13 (2.95, 10.10)        | 6.43 (3.07, 10.61)  | 0.16 (0.11, 0.21)    | <0.001               | 1.43 (1.00, 1.94)            | 1.18 (0.80, 1.62)               | -0.69 (-0.77, -0.61) | <0.001                  | 3.92 (2.81, 7.20)         | 4.55 (2.40, 5.58)    | -0.73 (0.14, 0.75)               | 0.47 (0.04, 0.12)               | 0.34 (0.04, 0.09) | -0.73 (0.48, 0.79)   | 0.002                         |
|                             | High-income North America | 6.25 (3.06, 10.24)  | 5.30 (2.98, 8.03)    | -0.53 (-0.67, -0.40) | <0.001                       | 5.32 (3.51, 7.82)               | 5.17 (3.35, 7.78)    | -0.06 (-0.21, 0.10)     | 0.491                     | 5.73 (4.46, 10.42)   | 12.22 (5.11, 15.92)              | 2.72 (2.13, 3.31)               | 0.09 (0.07, 0.16) | 0.19 (0.08, 0.25)    | 2.90 (2.34, 3.46)             |
| Central Asia                | 2.55 (1.17, 4.40)         | 3.19 (1.50, 5.60)   | 0.78 (0.73, 0.83)    | <0.001               | 0.25 (0.14, 0.38)            | 0.29 (0.16, 0.46)               | 0.54 (0.50, 0.58)    | <0.001                  | 3.75 (2.64, 5.16)         | 5.71 (3.94, 8.25)    | 1.50 (1.02, 1.97)                | 0.06 (0.04, 0.08)               | 0.09 (0.06, 0.13) | 1.50 (1.03, 1.98)    | <0.001                        |
|                             | Eastern Europe            | 5.04 (2.47, 8.30)   | 9.97 (5.47, 15.54)   | 2.35 (2.04, 2.65)    | <0.001                       | 0.61 (0.38, 0.91)               | 1.00 (0.61, 1.46)    | 1.71 (1.59, 1.83)       | <0.001                    | 10.70 (8.15, 18.80)  | 31.08 (13.55, 44.64)             | 3.92 (3.23, 4.61)               | 0.17 (0.13, 0.30) | 0.50 (0.22, 0.73)    | 3.93 (3.24, 4.62)             |
| Southern Sub-Saharan Africa | 6.23 (3.62, 9.31)         | 4.96 (2.48, 8.14)   | -0.76 (-0.87, -0.66) | <0.001               | 1.55 (0.89, 2.65)            | 1.37 (0.76, 2.37)               | -0.41 (-0.56, -0.25) | <0.001                  | 70.01 (32.37, 100.81)     | 28.60 (12.61, 52.47) | -2.86 (-4.41, -1.29)             | 1.14 (0.52, 1.64)               | 0.46 (0.20, 0.85) | -2.87 (-4.43, -1.29) | <0.001                        |
|                             | High-income Asia Pacific  | 5.91 (2.87, 9.62)   | 5.15 (2.51, 8.46)    | -0.48 (-0.51, -0.46) | <0.001                       | 2.32 (1.52, 3.45)               | 1.92 (1.27, 2.74)    | -0.67 (-0.73, -0.60)    | <0.001                    | 11.51 (6.68, 17.66)  | 4.39 (3.34, 6.74)                | -3.33 (-3.99, -2.68)            | 0.18 (0.11, 0.28) | 0.07 (0.05, 0.11)    | -3.40 (-4.07, -2.73)          |
| Central Europe              | 4.40 (2.08, 7.42)         | 5.10 (2.41, 8.54)   | 0.51 (0.45, 0.57)    | <0.001               | 0.66 (0.41, 0.97)            | 0.71 (0.46, 1.02)               | 0.21 (0.16, 0.26)    | <0.001                  | 5.86 (4.59, 9.02)         | 6.68 (3.43, 9.06)    | 0.40 (0.06, 0.74)                | 0.09 (0.07, 0.15)               | 0.11 (0.05, 0.15) | 0.40 (0.06, 0.75)    | 0.020                         |
|                             | Andean Latin America      | 3.22 (1.54, 5.49)   | 5.74 (2.72, 9.54)    | 2.02 (1.96, 2.07)    | <0.001                       | 0.58 (0.35, 0.87)               | 0.82 (0.50, 1.21)    | 1.25 (1.23, 1.27)       | <0.001                    | 13.23 (7.16, 22.14)  | 8.26 (4.75, 13.72)               | -1.58 (-2.28, -0.89)            | 0.21 (0.12, 0.36) | 0.13 (0.08, 0.22)    | -1.60 (-2.29, -0.89)          |
| Caribbean                   | 4.98 (2.49, 8.14)         | 8.61 (4.49, 13.64)  | 1.90 (1.85, 1.94)    | <0.001               | 0.79 (0.51, 1.13)            | 1.04 (0.67, 1.48)               | 0.95 (0.92, 0.99)    | <0.001                  | 18.80 (12.55, 29.46)      | 25.77 (15.19, 43.31) | 1.16 (0.88, 1.45)                | 0.30 (0.20, 0.48)               | 0.42 (0.25, 0.70) | 1.16 (0.88, 1.46)    | <0.001                        |
|                             | Southern Latin America    | 3.87 (1.88, 6.56)   | 6.96 (3.30, 11.31)   | 2.06 (2.02, 2.09)    | <0.001                       | 1.44 (0.95, 2.07)               | 1.50 (0.99, 2.11)    | 0.13 (0.12, 0.14)       | <0.001                    | 10.67 (6.26, 16.86)  | 10.88 (7.35, 16.03)              | 0.08 (-0.26, 0.42)              | 0.17 (0.10, 0.27) | 0.17 (0.12, 0.26)    | 0.08 (-0.26, 0.43)            |
| Oceania                     | 5.90 (3.14, 9.10)         | 7.23 (4.13, 10.94)  | 0.72 (0.68, 0.76)    | <0.001               | 0.59 (0.39, 0.83)            | 0.65 (0.42, 0.91)               | 0.31 (0.28, 0.34)    | <0.001                  | 11.25 (6.14, 20.01)       | 15.24 (7.72, 28.28)  | 1.02 (0.82, 1.22)                | 0.18 (0.10, 0.25)               | 0.25 (0.12, 0.34) | 1.02 (0.82, 1.22)    | <0.001                        |
| 315                         |                           |                     |                      |                      |                              |                                 |                      |                         |                           |                      |                                  |                                 |                   |                      |                               |

|                              | 2019               | 2020               | 2021                 | 2022   | 2023              | 2024              | 2025                 | 2026   | 2027                 | 2028                 | 2029 | 2030                 | 2031   | 2032              | 2033              | 2034                 | 2035 | 2036 | 2037 | 2038 | 2039 | 2040 |        |
|------------------------------|--------------------|--------------------|----------------------|--------|-------------------|-------------------|----------------------|--------|----------------------|----------------------|------|----------------------|--------|-------------------|-------------------|----------------------|------|------|------|------|------|------|--------|
|                              |                    |                    |                      |        |                   |                   |                      |        |                      |                      |      | 1.22)                |        | 0.32)             |                   | 0.46)                |      |      |      |      |      |      |        |
| Australasia                  | 5.58 (2.69, 9.23)  | 6.22 (2.89, 10.41) | 0.38 (0.35, 0.40)    | <0.001 | 1.80 (1.22, 2.50) | 1.42 (0.94, 2.02) | -0.81 (-0.85, -0.78) | <0.001 | 6.01 (4.05, 9.77)    | 6.91 (3.47, 10.45)   |      | 0.51 (-0.25, 1.27)   | 0.191  | 0.10 (0.06, 0.16) | 0.11 (0.06, 0.17) | 0.54 (-0.23, 1.32)   |      |      |      |      |      |      | 0.168  |
| <b>Men</b>                   |                    |                    |                      |        |                   |                   |                      |        |                      |                      |      |                      |        |                   |                   |                      |      |      |      |      |      |      |        |
| Global                       | 5.71 (2.92, 9.24)  | 6.15 (3.12, 9.93)  | 0.26 (0.24, 0.29)    | <0.001 | 0.99 (0.68, 1.36) | 1.03 (0.71, 1.43) | 0.17 (0.07, 0.27)    | 0.001  | 15.96 (13.15, 21.87) | 17.68 (13.53, 23.05) |      | 0.33 (0.02, 0.65)    | 0.036  | 0.26 (0.21, 0.35) | 0.29 (0.22, 0.37) | 0.34 (0.02, 0.65)    |      |      |      |      |      |      | 0.036  |
| <b>SDI category</b>          |                    |                    |                      |        |                   |                   |                      |        |                      |                      |      |                      |        |                   |                   |                      |      |      |      |      |      |      |        |
| High                         | 6.69 (3.30, 10.90) | 7.11 (3.71, 11.27) | 0.20 (0.17, 0.24)    | <0.001 | 1.97 (1.38, 2.69) | 2.09 (1.47, 2.86) | 0.24 (0.14, 0.33)    | <0.001 | 8.83 (7.00, 13.89)   | 10.95 (5.91, 13.19)  |      | 0.76 (0.46, 1.05)    | <0.001 | 0.14 (0.11, 0.22) | 0.17 (0.09, 0.21) | 0.77 (0.47, 1.06)    |      |      |      |      |      |      | <0.001 |
| High-middle                  | 6.89 (3.55, 11.00) | 7.63 (3.96, 12.15) | 0.35 (0.30, 0.40)    | <0.001 | 0.99 (0.67, 1.35) | 1.16 (0.79, 1.59) | 0.56 (0.54, 0.59)    | <0.001 | 18.20 (14.32, 24.44) | 21.31 (15.11, 25.98) |      | 0.63 (-0.19, 1.45)   | 0.131  | 0.29 (0.23, 0.40) | 0.34 (0.24, 0.42) | 0.63 (-0.18, 1.46)   |      |      |      |      |      |      | 0.130  |
| Middle                       | 5.88 (3.00, 9.47)  | 6.28 (3.17, 10.16) | 0.22 (0.20, 0.25)    | <0.001 | 0.91 (0.61, 1.28) | 1.02 (0.68, 1.42) | 0.38 (0.29, 0.46)    | <0.001 | 17.76 (13.41, 27.88) | 18.97 (14.88, 28.13) |      | 0.21 (-0.28, 0.69)   | 0.401  | 0.29 (0.22, 0.45) | 0.31 (0.24, 0.46) | 0.21 (-0.28, 0.70)   |      |      |      |      |      |      | 0.406  |
| Low-middle                   | 4.03 (2.01, 6.68)  | 5.14 (2.55, 8.43)  | 0.85 (0.78, 0.93)    | <0.001 | 0.51 (0.33, 0.72) | 0.64 (0.41, 0.91) | 0.79 (0.75, 0.84)    | <0.001 | 15.06 (10.52, 20.14) | 16.00 (11.76, 21.81) |      | 0.22 (-0.09, 0.54)   | 0.162  | 0.24 (0.17, 0.33) | 0.26 (0.19, 0.35) | 0.22 (-0.09, 0.54)   |      |      |      |      |      |      | 0.164  |
| Low                          | 3.90 (2.06, 6.21)  | 4.83 (2.48, 7.76)  | 0.79 (0.72, 0.86)    | <0.001 | 0.56 (0.36, 0.86) | 0.68 (0.43, 1.02) | 0.69 (0.64, 0.74)    | <0.001 | 17.98 (10.12, 28.41) | 18.34 (11.46, 26.63) |      | 0.05 (-0.12, 0.22)   | 0.556  | 0.29 (0.16, 0.46) | 0.30 (0.19, 0.43) | 0.05 (-0.12, 0.22)   |      |      |      |      |      |      | 0.566  |
| <b>21 GBD region</b>         |                    |                    |                      |        |                   |                   |                      |        |                      |                      |      |                      |        |                   |                   |                      |      |      |      |      |      |      |        |
| South Asia                   | 3.36 (1.61, 5.69)  | 4.68 (2.30, 7.66)  | 1.19 (1.11, 1.26)    | <0.001 | 0.36 (0.22, 0.52) | 0.48 (0.28, 0.70) | 1.00 (0.93, 1.06)    | <0.001 | 11.50 (7.32, 15.82)  | 13.13 (9.11, 18.19)  |      | 0.46 (0.02, 0.90)    | 0.040  | 0.19 (0.12, 0.26) | 0.21 (0.15, 0.29) | 0.46 (0.02, 0.90)    |      |      |      |      |      |      | 0.040  |
| East Asia                    | 7.26 (3.59, 11.67) | 5.57 (2.55, 9.22)  | -0.88 (-1.08, -0.68) | <0.001 | 0.90 (0.59, 1.28) | 0.90 (0.59, 1.28) | 0.02 (-0.05, 0.09)   | 0.633  | 10.06 (5.55, 13.58)  | 6.09 (4.35, 8.16)    |      | -1.73 (-2.24, -1.22) | <0.001 | 0.16 (0.09, 0.22) | 0.10 (0.07, 0.13) | -1.75 (-2.26, -1.23) |      |      |      |      |      |      | <0.001 |
| North Africa and Middle East | 6.49 (3.24, 10.58) | 7.91 (3.87, 13.15) | 0.68 (0.65, 0.72)    | <0.001 | 0.98 (0.66, 1.36) | 1.12 (0.75, 1.55) | 0.45 (0.42, 0.47)    | <0.001 | 11.29 (7.63, 18.43)  | 9.20 (6.10, 13.32)   |      | -0.69 (-0.90, 0.52)  | <0.001 | 0.18 (0.12, 0.24) | 0.15 (0.10, 0.20) | -0.70 (-0.91, 0.51)  |      |      |      |      |      |      | <0.001 |



|                          | 2010               | 2015               | 2020                 | 2025   | 2030              | 2035              | 2040                 | 2045   | 2050                 | 2055                 | 2060                 | 2065   | 2070              | 2075              | 2080                 |
|--------------------------|--------------------|--------------------|----------------------|--------|-------------------|-------------------|----------------------|--------|----------------------|----------------------|----------------------|--------|-------------------|-------------------|----------------------|
|                          |                    |                    |                      |        |                   |                   | -0.01                |        |                      |                      | -0.28                |        | 1.06              | 0.90              | -0.28                |
| High-income Asia Pacific | 7.46 (3.71, 12.18) | 6.71 (3.36, 10.73) | -0.38 (-0.42, -0.33) | <0.001 | 1.63 (1.14, 2.23) | 1.45 (1.01, 1.99) | -0.41 (-0.47, -0.35) | <0.001 | 9.86 (6.36, 14.91)   | 5.90 (3.99, 8.21)    | -1.73 (-2.02, -1.44) | <0.001 | 0.16 (0.10, 0.24) | 0.09 (0.06, 0.13) | -1.75 (-2.05, -1.45) |
| Central Europe           | 5.15 (2.54, 8.37)  | 6.51 (3.41, 10.30) | 0.83 (0.73, 0.93)    | <0.001 | 0.69 (0.45, 0.97) | 0.83 (0.56, 1.15) | 0.65 (0.58, 0.71)    | <0.001 | 10.32 (8.19, 15.35)  | 13.77 (6.32, 18.20)  | 1.03 (0.60, 1.46)    | <0.001 | 0.17 (0.13, 0.25) | 0.22 (0.10, 0.29) | 1.03 (0.60, 1.46)    |
| Andean Latin America     | 3.99 (1.93, 6.52)  | 6.72 (3.30, 11.04) | 1.82 (1.79, 1.85)    | <0.001 | 0.58 (0.36, 0.83) | 0.84 (0.53, 1.21) | 1.33 (1.28, 1.37)    | <0.001 | 17.45 (10.46, 27.46) | 15.01 (9.01, 24.54)  | -0.50 (-1.02, 0.04)  | 0.067  | 0.28 (0.17, 0.44) | 0.24 (0.15, 0.40) | -0.50 (-1.03, 0.03)  |
| Caribbean                | 5.50 (2.75, 8.98)  | 9.02 (4.60, 14.38) | 1.73 (1.66, 1.79)    | <0.001 | 0.74 (0.48, 1.06) | 1.01 (0.64, 1.45) | 1.05 (0.99, 1.10)    | <0.001 | 18.08 (13.55, 24.94) | 22.80 (15.96, 32.77) | 0.85 (0.50, 1.20)    | <0.001 | 0.29 (0.22, 0.40) | 0.37 (0.26, 0.53) | 0.85 (0.50, 1.20)    |
| Southern Latin America   | 4.29 (2.11, 7.10)  | 8.01 (3.99, 13.02) | 2.17 (2.10, 2.24)    | <0.001 | 1.23 (0.83, 1.71) | 1.45 (0.99, 1.96) | 0.56 (0.52, 0.61)    | <0.001 | 12.61 (7.43, 19.37)  | 17.69 (11.62, 25.19) | 1.22 (0.81, 1.64)    | <0.001 | 0.20 (0.12, 0.31) | 0.28 (0.19, 0.41) | 1.23 (0.81, 1.65)    |
| Oceania                  | 4.31 (2.29, 6.83)  | 5.14 (2.82, 8.08)  | 0.64 (0.55, 0.72)    | <0.001 | 0.59 (0.40, 0.82) | 0.62 (0.42, 0.87) | 0.18 (0.14, 0.23)    | <0.001 | 30.58 (17.84, 55.45) | 40.33 (22.36, 68.68) | 0.92 (0.73, 1.11)    | <0.001 | 0.50 (0.29, 0.90) | 0.65 (0.36, 1.11) | 0.92 (0.73, 1.11)    |
| Australasia              | 5.95 (2.83, 9.67)  | 6.53 (3.14, 10.87) | 0.32 (0.30, 0.34)    | <0.001 | 1.15 (0.79, 1.56) | 1.00 (0.66, 1.42) | -0.48 (-0.52, -0.45) | <0.001 | 7.05 (4.64, 10.70)   | 9.54 (3.70, 15.07)   | 0.96 (0.03, 1.90)    | 0.043  | 0.11 (0.07, 0.17) | 0.15 (0.06, 0.24) | 0.98 (0.04, 1.93)    |
| <b>30-34 years</b>       |                    |                    |                      |        |                   |                   |                      |        |                      |                      |                      |        |                   |                   |                      |
| <b>Women</b>             |                    |                    |                      |        |                   |                   |                      |        |                      |                      |                      |        |                   |                   |                      |
| Global                   | 5.72 (3.15, 9.09)  | 5.90 (3.19, 9.32)  | 0.13 (0.08, 0.17)    | <0.001 | 1.19 (0.80, 1.67) | 1.07 (0.70, 1.53) | -0.35 (-0.45, -0.25) | <0.001 | 12.23 (8.05, 16.57)  | 11.44 (8.20, 14.62)  | -0.22 (-0.48, 0.04)  | 0.098  | 0.21 (0.14, 0.29) | 0.20 (0.14, 0.26) | -0.22 (-0.48, 0.04)  |
| <b>SDI category</b>      |                    |                    |                      |        |                   |                   |                      |        |                      |                      |                      |        |                   |                   |                      |
| High                     | 6.83 (3.65, 10.84) | 6.65 (3.75, 10.34) | -0.09 (-0.13, -0.04) | <0.001 | 2.96 (1.86, 4.46) | 2.67 (1.69, 4.11) | -0.33 (-0.47, -0.19) | <0.001 | 6.79 (5.19, 10.45)   | 8.93 (4.71, 10.90)   | 1.01 (0.67, 1.35)    | <0.001 | 0.12 (0.09, 0.18) | 0.15 (0.08, 0.19) | 1.08 (0.75, 1.40)    |
| High-middle              | 6.58 (3.57, 10.45) | 7.19 (3.90, 11.31) | 0.30 (0.27, 0.34)    | <0.001 | 0.91 (0.59, 1.32) | 1.06 (0.70, 1.52) | 0.52 (0.42, 0.61)    | <0.001 | 8.32 (6.05, 10.64)   | 9.22 (5.60, 11.58)   | 0.36 (-0.30, 0.04)   | 0.282  | 0.15 (0.11, 0.10) | 0.16 (0.10, 0.10) | 0.36 (-0.30, 1.03)   |

|                              |                    |                    |                      |        |                   |                   |                      |        |                      |                      |                      |        |                   |                   |                      |        |
|------------------------------|--------------------|--------------------|----------------------|--------|-------------------|-------------------|----------------------|--------|----------------------|----------------------|----------------------|--------|-------------------|-------------------|----------------------|--------|
|                              |                    |                    |                      |        |                   |                   |                      |        |                      |                      | 1.03)                | 0.19)  | 0.20)             |                   |                      |        |
| Middle                       | 6.21 (3.49, 9.72)  | 6.20 (3.34, 9.92)  | 0.02 (-0.03, 0.07)   | 0.502  | 1.04 (0.68, 1.54) | 1.02 (0.65, 1.48) | -0.06 (-0.10, -0.01) | 0.010  | 16.21 (11.63, 24.37) | 12.32 (9.36, 17.81)  | -0.97 (-1.56, -0.37) | 0.001  | 0.28 (0.20, 0.43) | 0.22 (0.16, 0.31) | -0.97 (-1.57, -0.37) | 0.001  |
| Low-middle                   | 3.86 (2.10, 6.14)  | 4.96 (2.69, 7.92)  | 0.88 (0.82, 0.94)    | <0.001 | 0.47 (0.29, 0.70) | 0.61 (0.38, 0.91) | 0.94 (0.90, 0.98)    | <0.001 | 14.06 (7.00, 21.17)  | 13.20 (8.70, 19.01)  | -0.21 (-0.47, 0.04)  | 0.099  | 0.25 (0.12, 0.37) | 0.23 (0.15, 0.33) | -0.21 (-0.47, 0.04)  | 0.097  |
| Low                          | 3.28 (1.80, 5.26)  | 4.01 (2.15, 6.54)  | 0.75 (0.65, 0.85)    | <0.001 | 0.48 (0.28, 0.80) | 0.58 (0.34, 0.94) | 0.67 (0.56, 0.77)    | <0.001 | 15.38 (5.95, 23.69)  | 11.75 (7.09, 16.04)  | -0.94 (-1.11, -0.76) | <0.001 | 0.27 (0.10, 0.42) | 0.21 (0.12, 0.28) | -0.94 (-1.12, -0.76) | <0.001 |
| <b>21 GBD region</b>         |                    |                    |                      |        |                   |                   |                      |        |                      |                      |                      |        |                   |                   |                      |        |
| South Asia                   | 3.19 (1.66, 5.24)  | 4.53 (2.41, 7.31)  | 1.24 (1.14, 1.34)    | <0.001 | 0.36 (0.22, 0.53) | 0.48 (0.29, 0.72) | 1.03 (0.95, 1.12)    | <0.001 | 10.83 (5.49, 18.56)  | 11.32 (6.80, 17.38)  | 0.16 (-0.42, 0.74)   | 0.596  | 0.19 (0.10, 0.33) | 0.20 (0.12, 0.31) | 0.16 (-0.42, 0.74)   | 0.596  |
| East Asia                    | 7.87 (4.26, 12.51) | 5.66 (2.76, 9.22)  | -1.12 (-1.32, -0.92) | <0.001 | 0.87 (0.54, 1.29) | 0.79 (0.48, 1.17) | -0.36 (-0.46, -0.26) | <0.001 | 5.09 (2.43, 7.12)    | 2.12 (1.45, 3.20)    | -2.99 (-4.78, -1.17) | 0.001  | 0.09 (0.04, 0.12) | 0.04 (0.02, 0.06) | -3.04 (-4.85, -1.20) | 0.001  |
| North Africa and Middle East | 4.76 (2.53, 7.54)  | 6.30 (3.41, 9.83)  | 0.97 (0.95, 0.99)    | <0.001 | 0.95 (0.63, 1.37) | 1.02 (0.67, 1.47) | 0.26 (0.23, 0.29)    | <0.001 | 8.18 (4.52, 12.17)   | 6.75 (4.02, 9.40)    | -0.65 (-0.89, -0.42) | <0.001 | 0.14 (0.08, 0.21) | 0.12 (0.07, 0.16) | -0.65 (-0.86, -0.45) | <0.001 |
| Western Sub-Saharan Africa   | 3.63 (2.03, 5.66)  | 3.90 (2.08, 6.39)  | 0.30 (0.21, 0.40)    | <0.001 | 0.65 (0.37, 1.17) | 0.73 (0.41, 1.30) | 0.41 (0.35, 0.48)    | <0.001 | 17.49 (6.57, 28.85)  | 9.56 (6.14, 15.04)   | -2.07 (-2.23, -1.90) | <0.001 | 0.31 (0.11, 0.51) | 0.17 (0.11, 0.26) | -2.08 (-2.24, -1.91) | <0.001 |
| Southeast Asia               | 6.42 (4.00, 9.62)  | 8.29 (5.03, 12.63) | 0.87 (0.83, 0.91)    | <0.001 | 2.09 (1.28, 3.22) | 2.13 (1.38, 3.11) | 0.06 (0.01, 0.11)    | 0.011  | 38.75 (26.45, 65.45) | 34.26 (25.09, 52.77) | -0.42 (-0.85, 0.02)  | 0.061  | 0.68 (0.46, 1.15) | 0.60 (0.44, 0.93) | -0.41 (-0.85, 0.02)  | 0.062  |
| Eastern Sub-Saharan Africa   | 3.47 (2.01, 5.35)  | 3.58 (1.93, 5.85)  | 0.16 (0.07, 0.26)    | 0.001  | 0.69 (0.38, 1.27) | 0.78 (0.42, 1.43) | 0.43 (0.41, 0.46)    | <0.001 | 22.44 (6.77, 39.64)  | 13.75 (6.72, 22.17)  | -1.68 (-1.86, -1.49) | <0.001 | 0.39 (0.12, 0.70) | 0.24 (0.12, 0.39) | -1.68 (-1.87, -1.49) | <0.001 |
| Central Latin America        | 5.29 (2.78, 8.44)  | 6.73 (3.40, 10.71) | 0.82 (0.70, 0.94)    | <0.001 | 0.60 (0.31, 0.97) | 0.80 (0.44, 1.24) | 1.01 (0.98, 1.03)    | <0.001 | 7.33 (5.60, 10.62)   | 8.20 (5.35, 11.06)   | 0.47 (-0.06, 1.01)   | 0.083  | 0.13 (0.10, 0.19) | 0.14 (0.09, 0.19) | 0.47 (-0.07, 1.01)   | 0.088  |
| Tropical Latin America       | 4.95 (2.75, 7.15)  | 8.29 (4.33, 12.25) | 1.74 (1.45, 2.03)    | <0.001 | 0.50 (0.24, 0.76) | 0.93 (0.50, 1.36) | 2.11 (2.00, 2.22)    | <0.001 | 22.15 (16.47, 27.83) | 21.04 (15.93, 26.15) | -0.16 (-0.31, -0.01) | 0.502  | 0.39 (0.39, 0.39) | 0.37 (0.37, 0.37) | -0.16 (-0.16, -0.16) | 0.492  |

|                             |                    |                     |                      |        |                   |                   |                      |        |                       |                      |                      |                   |                   |                      |        |
|-----------------------------|--------------------|---------------------|----------------------|--------|-------------------|-------------------|----------------------|--------|-----------------------|----------------------|----------------------|-------------------|-------------------|----------------------|--------|
| America                     | 7.76)              | 13.51)              | 2.04)                |        | 0.89)             | 1.46)             | 2.22)                |        | 36.96)                | 31.32)               | (-0.61, 0.30)        | (0.29, 0.65)      | (0.28, 0.55)      | (-0.61, 0.30)        |        |
| Central Sub-Saharan Africa  | 2.76 (1.51, 4.38)  | 3.27 (1.71, 5.37)   | 0.64 (0.56, 0.72)    | <0.001 | 0.66 (0.34, 1.28) | 0.72 (0.38, 1.38) | 0.34 (0.29, 0.39)    | <0.001 | 15.93 (4.77, 31.93)   | 12.45 (5.30, 22.44)  | -0.88 (-1.11, -0.65) | 0.28 (0.08, 0.56) | 0.22 (0.09, 0.40) | -0.88 (-1.11, -0.65) | <0.001 |
| Western Europe              | 7.09 (3.68, 11.19) | 7.49 (3.97, 11.95)  | 0.20 (0.13, 0.27)    | <0.001 | 1.39 (0.89, 1.99) | 1.15 (0.75, 1.65) | -0.66 (-0.78, -0.55) | <0.001 | 4.09 (2.94, 7.84)     | 5.21 (2.83, 6.39)    | 0.81 (0.55, 1.08)    | 0.07 (0.05, 0.14) | 0.09 (0.05, 0.11) | 0.85 (0.58, 1.12)    | <0.001 |
| High-income North America   | 6.93 (3.69, 10.99) | 5.97 (3.60, 8.94)   | -0.49 (-0.54, -0.45) | <0.001 | 5.22 (3.05, 8.41) | 5.12 (2.99, 8.67) | -0.02 (-0.16, 0.12)  | 0.772  | 7.49 (5.91, 13.35)    | 14.85 (6.73, 18.83)  | 2.50 (1.75, 3.26)    | 0.12 (0.10, 0.23) | 0.25 (0.11, 0.32) | 2.61 (1.85, 3.38)    | <0.001 |
| Central Asia                | 3.00 (1.49, 4.87)  | 3.71 (1.90, 6.21)   | 0.74 (0.69, 0.79)    | <0.001 | 0.29 (0.16, 0.45) | 0.33 (0.19, 0.53) | 0.47 (0.44, 0.51)    | <0.001 | 4.75 (3.48, 6.47)     | 7.28 (5.31, 10.78)   | 1.48 (1.15, 1.80)    | 0.08 (0.06, 0.11) | 0.13 (0.09, 0.19) | 1.48 (1.16, 1.81)    | <0.001 |
| Eastern Europe              | 5.76 (3.06, 9.10)  | 11.71 (7.08, 17.59) | 2.46 (2.25, 2.67)    | <0.001 | 0.55 (0.32, 0.83) | 1.04 (0.65, 1.53) | 2.21 (2.04, 2.39)    | <0.001 | 6.47 (4.77, 10.40)    | 24.09 (7.62, 36.55)  | 4.78 (3.87, 5.70)    | 0.11 (0.08, 0.18) | 0.42 (0.13, 0.64) | 4.79 (3.88, 5.71)    | <0.001 |
| Southern Sub-Saharan Africa | 6.91 (4.37, 10.13) | 5.38 (2.98, 8.59)   | -0.83 (-0.93, -0.74) | <0.001 | 1.27 (0.74, 2.21) | 1.11 (0.62, 1.99) | -0.46 (-0.54, -0.37) | <0.001 | 71.25 (30.44, 103.07) | 27.90 (15.00, 48.99) | -3.00 (-5.12, -0.83) | 1.25 (0.53, 1.82) | 0.49 (0.26, 0.86) | -3.00 (-5.12, -0.84) | 0.007  |
| High-income Asia Pacific    | 6.76 (3.64, 10.71) | 5.76 (3.02, 9.26)   | -0.55 (-0.60, -0.51) | <0.001 | 1.93 (1.20, 2.93) | 1.53 (0.99, 2.23) | -0.84 (-0.99, -0.69) | <0.001 | 9.18 (5.26, 13.90)    | 3.83 (2.94, 5.93)    | -3.03 (-3.30, -2.75) | 0.16 (0.09, 0.24) | 0.07 (0.05, 0.10) | -3.08 (-3.36, -2.80) | <0.001 |
| Central Europe              | 5.21 (2.63, 8.44)  | 6.11 (3.21, 9.71)   | 0.55 (0.51, 0.60)    | <0.001 | 0.62 (0.37, 0.93) | 0.70 (0.43, 1.03) | 0.41 (0.35, 0.47)    | <0.001 | 4.70 (3.66, 6.88)     | 5.36 (2.73, 7.31)    | 0.50 (-0.05, 1.05)   | 0.08 (0.06, 0.12) | 0.09 (0.05, 0.13) | 0.50 (-0.05, 1.05)   | 0.075  |
| Andean Latin America        | 3.95 (2.23, 6.23)  | 7.10 (3.90, 10.98)  | 2.05 (2.00, 2.10)    | <0.001 | 0.34 (0.17, 0.64) | 0.82 (0.41, 1.33) | 3.12 (3.06, 3.18)    | <0.001 | 17.23 (9.25, 28.21)   | 11.33 (6.87, 18.34)  | -1.39 (-2.41, -0.36) | 0.30 (0.16, 0.50) | 0.20 (0.12, 0.32) | -1.40 (-2.42, -0.37) | 0.008  |
| Caribbean                   | 5.73 (3.25, 8.81)  | 10.26 (6.10, 15.53) | 2.03 (1.96, 2.10)    | <0.001 | 0.83 (0.53, 1.20) | 1.14 (0.74, 1.60) | 1.11 (1.07, 1.15)    | <0.001 | 17.16 (11.95, 25.69)  | 21.39 (12.67, 33.97) | 0.73 (0.36, 1.10)    | 0.30 (0.21, 0.45) | 0.38 (0.22, 0.60) | 0.73 (0.35, 1.11)    | <0.001 |
| Southern Latin America      | 4.46 (2.39, 6.23)  | 8.34 (4.57, 12.11)  | 2.19 (2.16, 2.22)    | <0.001 | 0.43 (0.22, 0.64) | 1.02 (0.55, 1.49) | 3.02 (2.93, 3.11)    | <0.001 | 8.18 (5.10, 11.26)    | 9.11 (6.24, 12.08)   | 0.47 (0.47, 0.47)    | 0.14 (0.14, 0.14) | 0.16 (0.16, 0.16) | 0.46 (0.14, 0.78)    | 0.005  |
|                             |                    |                     |                      |        |                   |                   |                      | 320    |                       |                      |                      |                   |                   |                      |        |





|                              |                    |                      |                   |        |                   |                   |                      |        |                      |                        |                      |        |                   |                   |                      |        |
|------------------------------|--------------------|----------------------|-------------------|--------|-------------------|-------------------|----------------------|--------|----------------------|------------------------|----------------------|--------|-------------------|-------------------|----------------------|--------|
|                              | 12.82)             | 11.07)               | -0.25)            |        | 1.31)             | 1.38)             | 0.25)                |        | 14.97)               | 9.96)                  | (-1.59,              |        | (0.12,            | (0.09,            | (-1.61,              |        |
|                              |                    |                      |                   |        |                   |                   |                      |        |                      |                        | -0.95)               |        | 0.26)             | 0.17)             | (-0.96,              |        |
| North Africa and Middle East | 7.88 (4.55, 11.97) | 9.59 (5.41, 14.79)   | 0.68 (0.64, 0.72) | <0.001 | 1.33 (0.92, 1.86) | 1.49 (1.01, 2.08) | 0.39 (0.33, 0.46)    | <0.001 | 16.00 (10.99, 26.76) | 12.66 (8.21, 18.64)    | -0.80 (-0.95, -0.64) | <0.001 | 0.28 (0.19, 0.47) | 0.22 (0.14, 0.33) | -0.80 (-0.96, -0.65) | <0.001 |
| Western Sub-Saharan Africa   | 4.16 (2.33, 6.55)  | 4.76 (2.62, 7.53)    | 0.52 (0.44, 0.60) | <0.001 | 0.69 (0.40, 1.19) | 0.78 (0.46, 1.31) | 0.45 (0.39, 0.51)    | <0.001 | 20.34 (11.60, 33.62) | 17.42 (11.27, 26.25)   | -0.53 (-0.65, -0.40) | <0.001 | 0.36 (0.20, 0.59) | 0.31 (0.20, 0.46) | -0.53 (-0.65, -0.41) | <0.001 |
| Southeast Asia               | 7.13 (4.56, 10.40) | 9.09 (5.86, 13.21)   | 0.84 (0.79, 0.89) | <0.001 | 1.66 (1.10, 2.40) | 1.87 (1.29, 2.63) | 0.42 (0.35, 0.48)    | <0.001 | 47.65 (29.65, 88.28) | 47.64 (33.78, 79.43)   | 0.09 (-0.42, 0.61)   | 0.718  | 0.84 (0.52, 1.56) | 0.84 (0.60, 1.40) | 0.10 (-0.41, 0.61)   | 0.716  |
| Eastern Sub-Saharan Africa   | 5.33 (3.35, 7.76)  | 5.64 (3.43, 8.57)    | 0.22 (0.12, 0.32) | <0.001 | 0.91 (0.55, 1.65) | 1.02 (0.60, 1.81) | 0.40 (0.38, 0.42)    | <0.001 | 33.15 (16.97, 60.39) | 29.44 (16.29, 51.13)   | -0.44 (-0.59, -0.29) | <0.001 | 0.58 (0.30, 1.06) | 0.52 (0.29, 0.90) | -0.44 (-0.59, -0.29) | <0.001 |
| Central Latin America        | 5.49 (2.91, 8.66)  | 9.07 (4.77, 14.37)   | 1.73 (1.66, 1.79) | <0.001 | 0.45 (0.23, 0.73) | 0.82 (0.45, 1.29) | 2.09 (2.06, 2.12)    | <0.001 | 13.36 (10.52, 20.83) | 17.27 (10.58, 23.33)   | 0.93 (0.60, 1.27)    | <0.001 | 0.24 (0.19, 0.37) | 0.30 (0.19, 0.41) | 0.93 (0.60, 1.26)    | <0.001 |
| Tropical Latin America       | 6.06 (3.61, 9.21)  | 10.40 (5.77, 16.21)  | 1.84 (1.76, 1.93) | <0.001 | 0.42 (0.24, 0.66) | 0.86 (0.47, 1.34) | 2.41 (2.34, 2.48)    | <0.001 | 29.35 (20.94, 45.21) | 25.12 (19.32, 39.64)   | -0.51 (-0.88, -0.14) | 0.007  | 0.52 (0.37, 0.80) | 0.44 (0.34, 0.70) | -0.52 (-0.89, -0.15) | 0.006  |
| Central Sub-Saharan Africa   | 3.84 (2.27, 5.78)  | 4.45 (2.57, 6.87)    | 0.57 (0.50, 0.63) | <0.001 | 0.71 (0.41, 1.35) | 0.78 (0.44, 1.43) | 0.34 (0.30, 0.37)    | <0.001 | 24.22 (11.45, 48.84) | 22.81 (11.50, 42.93)   | -0.23 (-0.32, -0.15) | <0.001 | 0.43 (0.20, 0.86) | 0.40 (0.20, 0.76) | -0.23 (-0.32, -0.15) | <0.001 |
| Western Europe               | 8.22 (4.47, 13.00) | 9.43 (5.37, 14.57)   | 0.46 (0.42, 0.50) | <0.001 | 1.39 (0.93, 1.92) | 1.33 (0.90, 1.86) | -0.15 (-0.18, -0.13) | <0.001 | 8.96 (6.44, 16.87)   | 12.22 (5.91, 15.78)    | 1.01 (0.83, 1.20)    | <0.001 | 0.16 (0.11, 0.30) | 0.21 (0.10, 0.28) | 1.03 (0.84, 1.21)    | <0.001 |
| High-income North America    | 7.08 (3.90, 11.20) | 7.65 (4.83, 11.35)   | 0.27 (0.17, 0.37) | <0.001 | 3.55 (2.15, 5.65) | 4.06 (2.38, 6.62) | 0.50 (0.27, 0.73)    | <0.001 | 14.68 (11.98, 24.51) | 22.10 (10.37, 28.97)   | 1.41 (0.94, 1.87)    | <0.001 | 0.25 (0.21, 0.43) | 0.38 (0.18, 0.51) | 1.42 (0.95, 1.89)    | <0.001 |
| Central Asia                 | 4.21 (2.21, 6.76)  | 5.07 (2.78, 8.09)    | 0.68 (0.61, 0.76) | <0.001 | 0.37 (0.22, 0.58) | 0.45 (0.26, 0.68) | 0.64 (0.56, 0.73)    | <0.001 | 8.14 (5.11, 11.96)   | 11.76 (8.62, 17.18)    | 1.26 (0.84, 1.68)    | <0.001 | 0.14 (0.09, 0.21) | 0.21 (0.15, 0.30) | 1.26 (0.85, 1.68)    | <0.001 |
| Eastern Europe               | 7.42 (4.50, 11.34) | 18.60 (10.47, 26.73) | 3.24 (3.06, 3.42) | <0.001 | 0.68 (0.45, 1.11) | 1.53 (1.06, 2.00) | 2.87 (2.61, 3.13)    | <0.001 | 27.80 (19.72, 35.88) | 103.16 (46.14, 160.18) | 4.64 (3.87, 5.41)    | <0.001 | 0.49 (0.30, 0.68) | 1.82 (1.17, 2.47) | 4.65 (3.88, 5.42)    | <0.001 |

|                             | 11.09)             | (12.60, 25.73)      | 3.41)                |        | 0.97)             | 2.12)             | 3.14)             |        | 54.94)               | 137.93)              | (3.87, 5.42)   |        | (0.35, 0.97) | (0.81, 2.44) | 5.42)             |        |
|-----------------------------|--------------------|---------------------|----------------------|--------|-------------------|-------------------|-------------------|--------|----------------------|----------------------|----------------|--------|--------------|--------------|-------------------|--------|
|                             |                    |                     |                      |        |                   |                   | -0.02             |        |                      |                      | -1.20          |        | 0.86         | 0.64         | -1.20             |        |
| Southern Sub-Saharan Africa | 6.23 (3.90, 9.18)  | 6.18 (3.67, 9.47)   | -0.03 (-0.08, 0.02)  | 0.262  | 0.91 (0.57, 1.50) | 0.91 (0.55, 1.50) | (-0.07, 0.02)     | 0.342  | 48.98 (30.95, 67.43) | 36.26 (24.43, 51.47) | (-2.58, 0.19)  | 0.091  | (0.54, 1.19) | (0.43, 0.91) | (-2.58, 0.20)     | 0.091  |
|                             |                    |                     |                      |        |                   |                   | -0.39             |        |                      |                      | -1.39          |        | 0.20         | 0.13         | -1.40             |        |
| High-income Asia Pacific    | 8.73 (4.90, 13.62) | 8.28 (4.65, 12.68)  | -0.17 (-0.22, -0.13) | <0.001 | 1.90 (1.29, 2.65) | 1.70 (1.15, 2.36) | (-0.44, -0.35)    | <0.001 | 11.37 (7.27, 17.12)  | 7.66 (5.37, 9.98)    | (-1.68, -1.09) | <0.001 | (0.13, 0.30) | (0.09, 0.17) | (-1.70, -1.10)    | <0.001 |
|                             |                    |                     |                      |        |                   |                   |                   |        |                      |                      | 1.02           |        | 0.23         | 0.31         | 1.02 (0.61, 1.43) | <0.001 |
| Central Europe              | 5.84 (3.17, 9.22)  | 7.92 (4.68, 11.96)  | 1.08 (0.95, 1.22)    | <0.001 | 0.73 (0.48, 1.05) | 0.96 (0.65, 1.33) | 0.90 (0.80, 1.00) | <0.001 | 13.09 (10.32, 20.90) | 17.60 (8.39, 23.43)  | (0.61, 1.43)   | <0.001 | (0.18, 0.37) | (0.15, 0.41) |                   |        |
|                             |                    |                     |                      |        |                   |                   |                   |        |                      |                      | -0.70          |        | 0.27         | 0.22         | -0.70             |        |
| Andean Latin America        | 4.84 (2.62, 7.61)  | 8.30 (4.58, 12.82)  | 1.89 (1.83, 1.95)    | <0.001 | 0.36 (0.19, 0.58) | 0.71 (0.38, 1.10) | 2.36 (2.27, 2.46) | <0.001 | 15.16 (9.05, 23.11)  | 12.60 (7.45, 20.67)  | (-0.98, -0.41) | <0.001 | (0.16, 0.41) | (0.13, 0.36) | (-0.99, -0.41)    | <0.001 |
|                             |                    |                     |                      |        |                   |                   |                   |        |                      |                      | 0.75           |        | 0.46         | 0.57         | 0.75 (0.48, 1.02) | <0.001 |
| Caribbean                   | 6.95 (4.10, 10.43) | 11.85 (7.27, 17.50) | 1.86 (1.82, 1.91)    | <0.001 | 0.84 (0.55, 1.19) | 1.22 (0.82, 1.70) | 1.29 (1.26, 1.33) | <0.001 | 26.24 (19.48, 36.38) | 32.27 (22.02, 45.89) | (0.48, 1.02)   | <0.001 | (0.34, 0.64) | (0.39, 0.81) |                   |        |
|                             |                    |                     |                      |        |                   |                   |                   |        |                      |                      | 1.52           |        | 0.26         | 0.39         | 1.51 (1.24, 1.79) | <0.001 |
| Southern Latin America      | 5.02 (2.80, 7.90)  | 9.93 (5.89, 14.99)  | 2.38 (2.29, 2.47)    | <0.001 | 0.41 (0.23, 0.64) | 1.04 (0.60, 1.60) | 3.27 (3.22, 3.33) | <0.001 | 14.60 (8.93, 22.76)  | 22.22 (13.99, 32.38) | (1.24, 1.80)   | <0.001 | (0.16, 0.40) | (0.25, 0.57) |                   |        |
|                             |                    |                     |                      |        |                   |                   |                   |        |                      |                      | 0.97           |        | 0.31         | 0.41         | 0.97 (0.77, 1.18) | <0.001 |
| Oceania                     | 4.83 (2.83, 7.37)  | 5.76 (3.50, 8.57)   | 0.62 (0.49, 0.75)    | <0.001 | 0.50 (0.33, 0.71) | 0.55 (0.37, 0.78) | 0.35 (0.24, 0.46) | <0.001 | 17.77 (10.02, 31.75) | 23.43 (14.27, 36.73) | (0.76, 1.18)   | <0.001 | (0.18, 0.56) | (0.25, 0.65) |                   |        |
|                             |                    |                     |                      |        |                   |                   |                   |        |                      |                      | 1.32           |        | 0.18         | 0.26         | 1.34 (0.68, 2.00) | <0.001 |
| Australasia                 | 7.15 (3.86, 11.14) | 8.47 (4.76, 13.01)  | 0.58 (0.52, 0.64)    | <0.001 | 1.43 (0.98, 1.97) | 1.28 (0.86, 1.78) | (-0.39, -0.35)    | <0.001 | 10.44 (6.99, 17.56)  | 14.93 (6.93, 24.62)  | (0.67, 1.98)   | <0.001 | (0.12, 0.31) | (0.12, 0.43) |                   |        |
| <b>35-39 years Women</b>    |                    |                     |                      |        |                   |                   |                   |        |                      |                      |                |        |              |              |                   |        |
|                             |                    |                     |                      |        |                   |                   |                   |        |                      |                      | 0.23           |        | 0.25         | 0.27         | 0.24 (0.08, 0.40) | 0.003  |
| Global                      | 6.53 (3.16, 10.55) | 6.85 (3.36, 10.98)  | 0.18 (0.12, 0.24)    | <0.001 | 1.09 (0.72, 1.51) | 1.06 (0.69, 1.48) | (-0.15, 0.02)     | 0.115  | 12.92 (9.05, 17.61)  | 13.78 (9.95, 17.69)  | (0.08, 0.39)   | 0.003  | (0.17, 0.34) | (0.19, 0.34) |                   |        |
| <b>SDI category</b>         |                    |                     |                      |        |                   |                   |                   |        |                      |                      |                |        |              |              |                   |        |
| High                        | 7.58 (3.52, 11.14) | 7.52 (3.78, 11.14)  | -0.02 (-0.08, 0.04)  | 0.413  | 2.39 (1.64, 3.14) | 1.94 (1.37, 2.51) | -0.68             | <0.001 | 7.42 (5.78, 9.06)    | 10.48 (5.81, 15.15)  | 1.18           | <0.001 | 0.14         | 0.20         | 1.22 (0.98, 1.46) | <0.001 |

|                              |                    |                    |                      |        |                   |                   |                   |        |                      |                      |                |        |              |              |                    |        |
|------------------------------|--------------------|--------------------|----------------------|--------|-------------------|-------------------|-------------------|--------|----------------------|----------------------|----------------|--------|--------------|--------------|--------------------|--------|
|                              | 12.50)             | 11.87)             | 0.03)                |        | 3.30)             | 2.66)             | (-0.74, -0.63)    |        | 12.12)               | 12.82)               | (0.95, 1.42)   |        | (0.11, 0.23) | (0.11, 0.25) | 1.46)              |        |
| High-middle                  | 7.51 (3.57, 12.16) | 8.32 (4.01, 13.28) | 0.37 (0.26, 0.48)    | <0.001 | 0.89 (0.56, 1.26) | 1.05 (0.67, 1.49) | 0.58 (0.54, 0.62) | <0.001 | 9.10 (6.78, 12.52)   | 11.11 (7.46, 13.51)  | (0.34, 1.15)   | <0.001 | (0.13, 0.24) | (0.14, 0.26) | 0.75 (0.34, 1.15)  | <0.001 |
| Middle                       | 7.14 (3.53, 11.40) | 7.30 (3.57, 11.62) | 0.10 (0.04, 0.16)    | 0.001  | 0.97 (0.63, 1.37) | 1.08 (0.71, 1.52) | 0.38 (0.31, 0.45) | <0.001 | 15.87 (11.66, 23.44) | 14.83 (11.24, 21.78) | (-0.30, -0.08) | 0.001  | (0.22, 0.45) | (0.22, 0.42) | (-0.30, -0.08)     | 0.001  |
| Low-middle                   | 4.35 (2.12, 7.12)  | 5.68 (2.79, 9.31)  | 0.96 (0.84, 1.08)    | <0.001 | 0.49 (0.30, 0.70) | 0.68 (0.42, 0.98) | 1.15 (1.13, 1.17) | <0.001 | 14.96 (8.48, 22.14)  | 15.51 (10.38, 21.62) | (-0.07, 0.34)  | 0.198  | (0.16, 0.43) | (0.20, 0.42) | 0.14 (-0.07, 0.34) | 0.194  |
| Low                          | 3.59 (1.84, 5.76)  | 4.50 (2.22, 7.37)  | 0.85 (0.73, 0.96)    | <0.001 | 0.61 (0.35, 0.98) | 0.76 (0.44, 1.20) | 0.76 (0.71, 0.80) | <0.001 | 20.65 (8.29, 31.87)  | 15.72 (9.01, 21.91)  | (-1.05, -0.82) | <0.001 | (0.16, 0.62) | (0.17, 0.42) | (-1.05, -0.82)     | <0.001 |
| <b>21 GBD region</b>         |                    |                    |                      |        |                   |                   |                   |        |                      |                      |                |        |              |              |                    |        |
| South Asia                   | 3.60 (1.68, 6.02)  | 5.20 (2.50, 8.59)  | 1.30 (1.16, 1.44)    | <0.001 | 0.36 (0.21, 0.53) | 0.50 (0.30, 0.75) | 1.16 (1.06, 1.25) | <0.001 | 11.41 (6.65, 18.81)  | 12.55 (7.90, 18.63)  | (-0.20, 0.68)  | 0.280  | (0.13, 0.36) | (0.15, 0.36) | 0.25 (-0.19, 0.69) | 0.270  |
| East Asia                    | 8.76 (4.08, 14.11) | 6.42 (2.72, 11.05) | -1.02 (-1.29, -0.75) | <0.001 | 0.81 (0.46, 1.19) | 0.74 (0.43, 1.12) | (-0.41, -0.15)    | <0.001 | 4.85 (2.69, 6.65)    | 2.35 (1.52, 3.32)    | (-2.81, -2.15) | <0.001 | (0.05, 0.13) | (0.03, 0.06) | (-2.85, -2.19)     | <0.001 |
| North Africa and Middle East | 5.97 (2.86, 9.85)  | 8.18 (3.98, 13.16) | 1.09 (1.07, 1.11)    | <0.001 | 1.07 (0.70, 1.50) | 1.15 (0.76, 1.60) | 0.25 (0.18, 0.31) | <0.001 | 11.02 (5.85, 16.42)  | 8.92 (5.10, 12.82)   | (-0.71, -0.57) | <0.001 | (0.11, 0.32) | (0.10, 0.25) | (-0.85, -0.57)     | <0.001 |
| Western Sub-Saharan Africa   | 3.94 (2.17, 6.13)  | 4.21 (2.06, 6.84)  | 0.30 (0.20, 0.39)    | <0.001 | 1.13 (0.64, 1.95) | 1.28 (0.71, 2.20) | 0.44 (0.39, 0.49) | <0.001 | 31.43 (11.87, 51.93) | 16.25 (10.27, 25.16) | (-2.37, -2.15) | <0.001 | (0.23, 1.00) | (0.20, 0.48) | (-2.39, -2.16)     | <0.001 |
| Southeast Asia               | 6.90 (4.06, 10.24) | 9.05 (5.18, 13.66) | 0.93 (0.90, 0.96)    | <0.001 | 1.80 (1.17, 2.54) | 1.89 (1.30, 2.60) | 0.16 (0.12, 0.19) | <0.001 | 40.68 (28.14, 64.69) | 37.57 (26.38, 57.97) | (-0.27, -0.03) | 0.028  | (0.54, 1.25) | (0.51, 1.12) | (-0.51, -0.03)     | 0.028  |
| Eastern Sub-Saharan Africa   | 3.65 (2.06, 5.62)  | 3.89 (1.95, 6.34)  | 0.27 (0.17, 0.37)    | <0.001 | 0.86 (0.49, 1.47) | 1.00 (0.57, 1.73) | 0.53 (0.47, 0.59) | <0.001 | 29.46 (9.35, 51.60)  | 18.26 (8.45, 30.53)  | (-1.64, -1.51) | <0.001 | (0.18, 1.00) | (0.16, 0.59) | (-1.77, -1.51)     | <0.001 |

|                             |                    |                     |                      |        |                   |                   |                      |        |                      |                      |                      |        |                   |                   |                      |        |
|-----------------------------|--------------------|---------------------|----------------------|--------|-------------------|-------------------|----------------------|--------|----------------------|----------------------|----------------------|--------|-------------------|-------------------|----------------------|--------|
| Central Latin America       | 6.14 (2.83, 10.06) | 8.22 (3.59, 13.88)  | 1.01 (0.92, 1.10)    | <0.001 | 0.71 (0.40, 1.09) | 0.98 (0.55, 1.48) | 1.09 (1.05, 1.13)    | <0.001 | 9.61 (7.46, 14.85)   | 11.30 (7.31, 15.51)  | 0.61 (0.30, 0.93)    | <0.001 | 0.19 (0.14, 0.29) | 0.22 (0.14, 0.30) | 0.61 (0.29, 0.93)    | <0.001 |
| Tropical Latin America      | 5.54 (2.99, 8.59)  | 9.97 (4.82, 16.04)  | 1.99 (1.78, 2.21)    | <0.001 | 0.58 (0.31, 0.92) | 1.09 (0.61, 1.63) | 2.18 (2.09, 2.28)    | <0.001 | 24.22 (18.91, 42.37) | 24.71 (18.56, 36.88) | 0.09 (-0.07, 0.26)   | 0.275  | 0.47 (0.37, 0.82) | 0.48 (0.36, 0.71) | 0.09 (-0.08, 0.26)   | 0.300  |
| Central Sub-Saharan Africa  | 3.10 (1.59, 5.02)  | 3.67 (1.84, 6.16)   | 0.63 (0.56, 0.71)    | <0.001 | 0.83 (0.45, 1.48) | 0.92 (0.50, 1.60) | 0.34 (0.31, 0.37)    | <0.001 | 21.73 (6.85, 42.35)  | 17.86 (7.40, 34.45)  | -0.69 (-0.93, -0.46) | <0.001 | 0.42 (0.13, 0.82) | 0.34 (0.14, 0.66) | -0.70 (-0.93, -0.46) | <0.001 |
| Western Europe              | 7.98 (3.63, 13.24) | 8.42 (3.87, 13.86)  | 0.16 (0.09, 0.24)    | <0.001 | 1.26 (0.83, 1.80) | 1.06 (0.66, 1.54) | -0.60 (-0.68, -0.52) | <0.001 | 4.80 (3.36, 9.52)    | 6.02 (3.45, 7.39)    | 0.81 (0.66, 0.96)    | <0.001 | 0.09 (0.06, 0.18) | 0.12 (0.07, 0.14) | 0.84 (0.65, 1.03)    | <0.001 |
| High-income North America   | 7.41 (3.48, 12.13) | 6.48 (3.64, 9.88)   | -0.45 (-0.49, -0.41) | <0.001 | 4.03 (2.71, 5.80) | 3.28 (2.25, 4.68) | -0.67 (-0.88, -0.46) | <0.001 | 8.59 (6.67, 16.25)   | 17.40 (8.46, 21.39)  | 2.44 (2.07, 2.81)    | <0.001 | 0.16 (0.12, 0.31) | 0.33 (0.16, 0.41) | 2.52 (2.14, 2.90)    | <0.001 |
| Central Asia                | 3.46 (1.50, 5.93)  | 4.25 (1.92, 7.12)   | 0.73 (0.69, 0.77)    | <0.001 | 0.31 (0.16, 0.49) | 0.36 (0.18, 0.58) | 0.53 (0.49, 0.57)    | <0.001 | 3.99 (2.82, 5.98)    | 6.60 (4.71, 10.23)   | 1.76 (1.41, 2.11)    | <0.001 | 0.08 (0.05, 0.12) | 0.13 (0.09, 0.20) | 1.76 (1.41, 2.11)    | <0.001 |
| Eastern Europe              | 6.48 (3.07, 10.70) | 12.44 (6.76, 19.16) | 2.30 (2.18, 2.42)    | <0.001 | 0.60 (0.34, 0.93) | 1.10 (0.65, 1.60) | 2.12 (2.02, 2.21)    | <0.001 | 7.53 (5.57, 14.44)   | 24.09 (10.54, 34.04) | 4.21 (3.38, 5.04)    | <0.001 | 0.15 (0.11, 0.28) | 0.47 (0.20, 0.66) | 4.21 (3.38, 5.04)    | <0.001 |
| Southern Sub-Saharan Africa | 7.29 (4.39, 10.74) | 5.91 (3.05, 9.42)   | -0.70 (-0.84, -0.57) | <0.001 | 1.52 (0.92, 2.45) | 1.34 (0.79, 2.17) | -0.41 (-0.47, -0.36) | <0.001 | 66.14 (29.23, 96.73) | 23.62 (12.90, 41.94) | -3.45 (-4.86, -2.02) | <0.001 | 1.27 (0.56, 1.87) | 0.45 (0.25, 0.81) | -3.46 (-4.87, -2.02) | <0.001 |
| High-income Asia Pacific    | 7.76 (3.66, 12.73) | 6.49 (2.98, 10.74)  | -0.61 (-0.66, -0.57) | <0.001 | 1.75 (1.12, 2.52) | 1.39 (0.94, 1.95) | -0.80 (-0.89, -0.71) | <0.001 | 8.85 (5.68, 13.08)   | 4.72 (3.54, 7.44)    | -2.19 (-2.44, -1.94) | <0.001 | 0.17 (0.11, 0.25) | 0.09 (0.07, 0.14) | -2.22 (-2.47, -1.97) | <0.001 |
| Central Europe              | 6.14 (2.73, 10.43) | 7.24 (3.30, 11.84)  | 0.57 (0.50, 0.64)    | <0.001 | 0.68 (0.39, 1.00) | 0.75 (0.44, 1.14) | 0.37 (0.29, 0.45)    | <0.001 | 5.49 (4.41, 8.92)    | 6.43 (3.31, 8.70)    | 0.63 (0.27, 0.98)    | 0.001  | 0.11 (0.08, 0.17) | 0.12 (0.06, 0.17) | 0.63 (0.27, 0.99)    | 0.001  |
| Andean Latin America        | 4.72 (2.42, 7.57)  | 8.48 (4.08, 14.02)  | 2.04 (2.01, 2.07)    | <0.001 | 0.41 (0.20, 0.74) | 0.97 (0.54, 1.45) | 2.97 (2.92, 3.02)    | <0.001 | 22.98 (12.83, 36.89) | 14.75 (8.98, 23.56)  | -1.44 (-2.36, -0.51) | 0.002  | 0.44 (0.25, 0.71) | 0.28 (0.17, 0.45) | -1.44 (-2.37, -0.51) | 0.002  |

|                        | 2019               | 2020                | 2021              | 95% CI | 2019              | 2020              | 2021                 | 95% CI | 2019                 | 2020                 | 2021                | 95% CI | 2019              | 2020              | 2021                | 95% CI |
|------------------------|--------------------|---------------------|-------------------|--------|-------------------|-------------------|----------------------|--------|----------------------|----------------------|---------------------|--------|-------------------|-------------------|---------------------|--------|
| Caribbean              | 6.43 (3.34, 10.22) | 11.99 (6.65, 18.25) | 2.17 (2.12, 2.22) | <0.001 | 0.88 (0.59, 1.22) | 1.29 (0.84, 1.77) | 1.33 (1.31, 1.35)    | <0.001 | 24.29 (17.54, 37.58) | 32.24 (20.75, 51.21) | 1.01 (0.69, 1.32)   | <0.001 | 0.47 (0.34, 0.73) | 0.62 (0.40, 0.99) | 1.01 (0.69, 1.32)   | <0.001 |
| Southern Latin America | 5.03 (2.42, 8.21)  | 9.86 (4.94, 16.00)  | 2.35 (2.29, 2.41) | <0.001 | 0.52 (0.25, 0.97) | 1.23 (0.67, 1.97) | 3.03 (2.96, 3.10)    | <0.001 | 16.37 (10.55, 26.93) | 18.22 (12.03, 31.01) | 0.36 (0.04, 0.68)   | 0.029  | 0.32 (0.20, 0.52) | 0.35 (0.23, 0.60) | 0.35 (0.03, 0.67)   | 0.033  |
| Oceania                | 7.29 (4.51, 10.69) | 9.34 (6.00, 13.32)  | 0.87 (0.80, 0.93) | <0.001 | 1.09 (0.73, 1.52) | 1.13 (0.81, 1.57) | 0.15 (0.13, 0.16)    | <0.001 | 40.35 (22.22, 73.21) | 55.89 (29.65, 99.82) | 1.11 (0.81, 1.41)   | <0.001 | 0.78 (0.43, 1.42) | 1.08 (0.57, 1.93) | 1.11 (0.81, 1.41)   | <0.001 |
| Australasia            | 7.59 (3.42, 12.63) | 8.76 (4.11, 14.24)  | 0.50 (0.41, 0.59) | <0.001 | 1.56 (1.05, 2.17) | 1.34 (0.87, 1.86) | -0.54 (-0.62, -0.47) | <0.001 | 4.73 (3.18, 7.58)    | 7.42 (3.46, 11.76)   | 1.52 (1.05, 2.00)   | <0.001 | 0.09 (0.06, 0.14) | 0.14 (0.07, 0.23) | 1.57 (1.09, 2.05)   | <0.001 |
| <b>Men</b>             |                    |                     |                   |        |                   |                   |                      |        |                      |                      |                     |        |                   |                   |                     |        |
| Global                 | 7.72 (4.00, 12.09) | 9.20 (4.89, 14.33)  | 0.61 (0.56, 0.66) | <0.001 | 1.09 (0.73, 1.50) | 1.23 (0.82, 1.68) | 0.42 (0.37, 0.48)    | <0.001 | 21.62 (17.89, 30.43) | 25.36 (19.73, 32.83) | 0.59 (0.29, 0.89)   | <0.001 | 0.42 (0.34, 0.59) | 0.49 (0.38, 0.63) | 0.59 (0.29, 0.89)   | <0.001 |
| <b>SDI category</b>    |                    |                     |                   |        |                   |                   |                      |        |                      |                      |                     |        |                   |                   |                     |        |
| High                   | 9.04 (4.48, 14.37) | 10.42 (5.67, 16.13) | 0.49 (0.44, 0.54) | <0.001 | 2.05 (1.42, 2.84) | 1.97 (1.41, 2.64) | -0.11 (-0.17, -0.06) | <0.001 | 15.66 (12.98, 24.69) | 19.67 (11.41, 23.54) | 0.78 (0.63, 0.92)   | <0.001 | 0.30 (0.25, 0.48) | 0.38 (0.22, 0.45) | 0.78 (0.64, 0.93)   | <0.001 |
| High-middle            | 9.19 (4.92, 14.13) | 12.05 (6.53, 18.58) | 0.94 (0.89, 0.98) | <0.001 | 1.04 (0.68, 1.43) | 1.39 (0.91, 1.92) | 1.00 (0.97, 1.03)    | <0.001 | 22.05 (17.72, 31.29) | 31.30 (19.88, 38.22) | 1.25 (0.69, 1.81)   | <0.001 | 0.43 (0.34, 0.60) | 0.60 (0.38, 0.74) | 1.25 (0.69, 1.81)   | <0.001 |
| Middle                 | 7.95 (4.07, 12.41) | 9.28 (4.77, 14.76)  | 0.54 (0.47, 0.61) | <0.001 | 0.98 (0.64, 1.36) | 1.23 (0.80, 1.72) | 0.78 (0.72, 0.84)    | <0.001 | 23.17 (17.33, 38.13) | 23.99 (18.47, 38.22) | 0.14 (-0.09, 0.38)  | 0.224  | 0.45 (0.33, 0.74) | 0.46 (0.36, 0.74) | 0.14 (-0.09, 0.37)  | 0.234  |
| Low-middle             | 5.21 (2.68, 8.35)  | 7.18 (3.73, 11.22)  | 1.14 (1.05, 1.22) | <0.001 | 0.55 (0.35, 0.78) | 0.78 (0.49, 1.10) | 1.18 (1.13, 1.24)    | <0.001 | 21.33 (15.39, 29.14) | 24.47 (17.96, 33.44) | 0.49 (0.05, 0.94)   | 0.030  | 0.41 (0.30, 0.56) | 0.47 (0.35, 0.65) | 0.49 (0.05, 0.93)   | 0.030  |
| Low                    | 4.82 (2.72, 7.39)  | 6.09 (3.28, 9.43)   | 0.85 (0.79, 0.92) | <0.001 | 0.70 (0.43, 1.07) | 0.87 (0.55, 1.33) | 0.79 (0.76, 0.81)    | <0.001 | 28.27 (15.95, 44.42) | 26.92 (17.60, 40.00) | -0.18 (-0.40, 0.04) | 0.113  | 0.55 (0.31, 0.86) | 0.52 (0.34, 0.77) | -0.18 (-0.40, 0.04) | 0.108  |
| <b>21 GBD region</b>   |                    |                     |                   |        |                   |                   |                      |        |                      |                      |                     |        |                   |                   |                     |        |

|                              | 2010        | 2011         | 2012          | 2013   | 2014        | 2015        | 2016        | 2017   | 2018          | 2019          | 2020    | 2021   | 2022   | 2023         | 2024   |       |       |
|------------------------------|-------------|--------------|---------------|--------|-------------|-------------|-------------|--------|---------------|---------------|---------|--------|--------|--------------|--------|-------|-------|
| South Asia                   | 4.42 (2.23, | 6.40 (3.30,  | 1.30 (1.20,   | <0.001 | 0.42 (0.26, | 0.59 (0.36, | 1.18 (1.11, | <0.001 | 19.65 (13.23, | 22.34 (15.39, | 0.45    | 0.38   | 0.43   | 0.45 (-0.43, | 0.319  |       |       |
|                              | 7.17)       | 10.10)       | 1.40)         |        | 0.61)       | 0.86)       | 1.26)       |        | 27.00)        | 30.91)        | (-0.44, | (0.26, | (0.30, | 1.35)        | 0.52)  | 0.60) | 1.35) |
| East Asia                    | 9.49 (4.63, | 8.97 (4.10,  | -0.14 (-0.36, | 0.206  | 0.93 (0.56, | 1.06 (0.63, | 0.51 (0.35, | <0.001 | 12.32 (7.40,  | 8.22 (5.80,   | -1.33   | 0.24   | 0.16   | -1.34        | <0.001 |       |       |
|                              | 15.13)      | 14.90)       | 0.08)         |        | 1.33)       | 1.55)       | 0.67)       |        | 16.75)        | 10.76)        | (-1.86, | (0.14, | (0.11, | (-1.87,      | <0.001 |       |       |
| North Africa and Middle East | 9.70 (5.24, | 11.79 (5.98, | 0.68 (0.61,   | <0.001 | 1.49 (1.02, | 1.64 (1.09, | 0.33 (0.24, | <0.001 | 21.77 (14.60, | 15.89 (10.93, | -1.10   | 0.42   | 0.31   | -1.11        | <0.001 |       |       |
|                              | 15.01)      | 19.03)       | 0.76)         |        | 2.05)       | 2.25)       | 0.42)       |        | 37.74)        | 23.64)        | (-1.23, | (0.28, | (0.21, | (-1.24,      | <0.001 |       |       |
| Western Sub-Saharan Africa   | 4.48 (2.35, | 5.10 (2.58,  | 0.53 (0.44,   | <0.001 | 0.93 (0.55, | 1.04 (0.61, | 0.41 (0.32, | <0.001 | 28.33 (15.21, | 23.26 (14.01, | -0.69   | 0.55   | 0.45   | -0.69        | <0.001 |       |       |
|                              | 7.13)       | 8.22)        | 0.63)         |        | 1.50)       | 1.67)       | 0.51)       |        | 51.23)        | 36.64)        | (-0.81, | (0.29, | (0.27, | (-0.82,      | <0.001 |       |       |
| Southeast Asia               | 8.09 (4.94, | 10.35 (6.26, | 0.85 (0.81,   | <0.001 | 1.76 (1.21, | 2.01 (1.40, | 0.45 (0.42, | <0.001 | 55.63 (33.39, | 54.70 (36.09, | -0.01   | 1.07   | 1.06   | -0.01        | 0.945  |       |       |
|                              | 11.83)      | 15.01)       | 0.89)         |        | 2.44)       | 2.75)       | 0.47)       |        | 108.88)       | 100.04)       | (-0.31, | (0.64, | (0.70, | (-0.32,      | 0.29)  | 2.10) | 1.93) |
| Eastern Sub-Saharan Africa   | 5.76 (3.54, | 6.08 (3.52,  | 0.20 (0.11,   | <0.001 | 1.12 (0.67, | 1.28 (0.76, | 0.46 (0.44, | <0.001 | 43.20 (20.96, | 35.95 (19.47, | -0.63   | 0.83   | 0.69   | -0.63        | <0.001 |       |       |
|                              | 8.46)       | 9.16)        | 0.29)         |        | 1.86)       | 2.13)       | 0.47)       |        | 77.01)        | 61.68)        | (-0.83, | (0.40, | (0.38, | (-0.83,      | <0.001 |       |       |
| Central Latin America        | 6.37 (3.05, | 11.34 (5.29, | 1.99 (1.88,   | <0.001 | 0.53 (0.27, | 1.02 (0.52, | 2.30 (2.27, | <0.001 | 14.34 (11.23, | 18.67 (11.21, | 0.96    | 0.28   | 0.36   | 0.96 (0.68,  | <0.001 |       |       |
|                              | 10.40)      | 18.61)       | 2.11)         |        | 0.83)       | 1.63)       | 2.33)       |        | 22.25)        | 24.87)        | (0.69,  | (0.22, | (0.22, | 1.24)        | <0.001 |       |       |
| Tropical Latin America       | 7.13 (4.00, | 13.65 (6.94, | 2.22 (2.13,   | <0.001 | 0.51 (0.30, | 1.14 (0.61, | 2.80 (2.71, | <0.001 | 35.61 (25.54, | 32.88 (23.65, | -0.26   | 0.69   | 0.63   | -0.27        | 0.126  |       |       |
|                              | 10.87)      | 21.78)       | 2.31)         |        | 0.76)       | 1.79)       | 2.88)       |        | 55.65)        | 49.84)        | (-0.59, | (0.49, | (0.46, | (-0.59,      | 0.07)  | 1.08) | 0.96) |
| Central Sub-Saharan Africa   | 4.42 (2.48, | 5.10 (2.78,  | 0.56 (0.50,   | <0.001 | 0.86 (0.51, | 0.94 (0.55, | 0.32 (0.28, | <0.001 | 32.41 (14.95, | 30.10 (15.54, | -0.31   | 0.63   | 0.58   | -0.31        | <0.001 |       |       |
|                              | 6.71)       | 8.01)        | 0.61)         |        | 1.44)       | 1.55)       | 0.35)       |        | 65.56)        | 58.77)        | (-0.43, | (0.29, | (0.30, | (-0.43,      | <0.001 |       |       |
| Western Europe               | 9.63 (4.61, | 11.40 (5.84, | 0.57 (0.55,   | <0.001 | 1.35 (0.88, | 1.34 (0.85, | -0.03       | 0.180  | 10.51 (7.42,  | 14.90 (7.14,  | 1.13    | 0.20   | 0.29   | 1.14 (0.85,  | <0.001 |       |       |
|                              | 15.57)      | 18.26)       | 0.59)         |        | 1.88)       | 1.88)       | (-0.07,     |        | 20.64)        | 19.04)        | (0.84,  | (0.14, | (0.14, | 1.44)        | <0.001 |       |       |
| High-income North America    | 7.93 (4.05, | 8.60 (5.20,  | 0.29 (0.20,   | <0.001 | 2.93 (2.00, | 2.72 (1.91, | -0.21       | 0.047  | 19.76 (16.51, | 27.83 (14.59, | 1.24    | 0.38   | 0.53   | 1.25 (1.01,  | <0.001 |       |       |
|                              | 12.60)      | 12.63)       | 0.38)         |        | 4.20)       | 3.87)       | (-0.43,     |        | 32.34)        | 34.25)        | (0.99,  | (0.31, | (0.28, | 1.50)        | <0.001 |       |       |
|                              |             |              |               |        |             |             |             |        |               |               | 1.48)   | 0.62)  | 0.66)  |              |        |       |       |

|                                                      |                     |                      |                      |        |                   |                   |                      |        |                      |                        |                      |        |                   |                   |                      |        |
|------------------------------------------------------|---------------------|----------------------|----------------------|--------|-------------------|-------------------|----------------------|--------|----------------------|------------------------|----------------------|--------|-------------------|-------------------|----------------------|--------|
| Central Asia                                         | 5.06 (2.35, 8.46)   | 6.13 (2.98, 9.81)    | 0.70 (0.59, 0.82)    | <0.001 | 0.45 (0.24, 0.69) | 0.53 (0.30, 0.81) | 0.65 (0.58, 0.72)    | <0.001 | 11.21 (7.32, 16.57)  | 15.95 (11.57, 25.62)   | 1.19 (0.75, 1.63)    | <0.001 | 0.22 (0.14, 0.32) | 0.31 (0.22, 0.50) | 1.18 (0.75, 1.62)    | <0.001 |
| Eastern Europe                                       | 8.50 (4.86, 12.98)  | 21.37 (13.40, 30.91) | 3.29 (3.03, 3.54)    | <0.001 | 0.78 (0.50, 1.09) | 1.76 (1.17, 2.47) | 2.91 (2.67, 3.15)    | <0.001 | 31.21 (21.50, 66.95) | 108.67 (50.90, 145.65) | 4.49 (3.50, 5.48)    | <0.001 | 0.60 (0.42, 1.30) | 2.10 (0.98, 2.82) | 4.49 (3.50, 5.48)    | <0.001 |
| Southern Sub-Saharan Africa                          | 7.14 (4.37, 10.63)  | 6.68 (3.80, 10.26)   | -0.22 (-0.30, -0.14) | <0.001 | 1.11 (0.71, 1.71) | 1.08 (0.67, 1.67) | -0.11 (-0.14, -0.08) | <0.001 | 62.17 (34.89, 86.37) | 41.66 (26.62, 58.78)   | -1.37 (-2.15, -0.59) | 0.001  | 1.20 (0.67, 1.67) | 0.80 (0.51, 1.13) | -1.37 (-2.15, -0.59) | 0.001  |
| High-income Asia Pacific                             | 10.44 (5.18, 16.85) | 9.97 (4.98, 16.25)   | -0.16 (-0.24, -0.09) | <0.001 | 1.94 (1.31, 2.68) | 1.83 (1.28, 2.49) | -0.21 (-0.24, -0.17) | <0.001 | 13.16 (8.85, 19.53)  | 9.32 (6.98, 13.41)     | -1.21 (-1.50, -0.92) | <0.001 | 0.25 (0.17, 0.38) | 0.18 (0.13, 0.26) | -1.22 (-1.51, -0.93) | <0.001 |
| Central Europe                                       | 6.64 (3.24, 10.78)  | 9.49 (5.22, 14.78)   | 1.24 (1.12, 1.36)    | <0.001 | 0.80 (0.51, 1.12) | 1.07 (0.71, 1.49) | 0.99 (0.91, 1.07)    | <0.001 | 15.60 (12.37, 24.41) | 21.05 (9.91, 27.68)    | 1.05 (0.78, 1.32)    | <0.001 | 0.30 (0.24, 0.47) | 0.41 (0.19, 0.53) | 1.05 (0.78, 1.32)    | <0.001 |
| Andean Latin America                                 | 5.86 (2.85, 9.43)   | 10.05 (4.98, 16.18)  | 1.89 (1.85, 1.93)    | <0.001 | 0.44 (0.22, 0.71) | 0.87 (0.45, 1.37) | 2.40 (2.30, 2.51)    | <0.001 | 17.97 (11.70, 26.37) | 14.39 (8.49, 22.37)    | -0.69 (-1.09, -0.29) | 0.001  | 0.35 (0.23, 0.51) | 0.28 (0.16, 0.43) | -0.70 (-1.10, -0.30) | 0.001  |
| Caribbean                                            | 8.78 (4.82, 13.52)  | 15.57 (9.09, 23.23)  | 1.99 (1.96, 2.02)    | <0.001 | 0.93 (0.61, 1.30) | 1.48 (0.97, 2.06) | 1.62 (1.59, 1.65)    | <0.001 | 29.59 (22.02, 43.33) | 39.27 (27.62, 55.20)   | 0.98 (0.52, 1.44)    | <0.001 | 0.57 (0.42, 0.84) | 0.76 (0.53, 1.07) | 0.98 (0.52, 1.44)    | <0.001 |
| Southern Latin America                               | 5.84 (3.05, 9.45)   | 12.20 (6.57, 19.14)  | 2.56 (2.53, 2.59)    | <0.001 | 0.47 (0.25, 0.73) | 1.19 (0.66, 1.80) | 3.23 (3.15, 3.32)    | <0.001 | 23.14 (15.66, 36.99) | 33.93 (23.21, 50.58)   | 1.37 (0.85, 1.90)    | <0.001 | 0.45 (0.30, 0.72) | 0.65 (0.45, 0.98) | 1.36 (0.84, 1.89)    | <0.001 |
| Oceania                                              | 5.36 (2.95, 8.18)   | 6.34 (3.58, 9.65)    | 0.60 (0.49, 0.71)    | <0.001 | 0.60 (0.40, 0.83) | 0.66 (0.44, 0.91) | 0.36 (0.26, 0.46)    | <0.001 | 30.83 (18.11, 55.69) | 38.43 (23.51, 61.60)   | 0.74 (0.62, 0.85)    | <0.001 | 0.60 (0.35, 1.08) | 0.74 (0.45, 1.19) | 0.74 (0.62, 0.85)    | <0.001 |
| Australasia                                          | 8.58 (4.00, 14.09)  | 10.77 (5.58, 17.64)  | 0.79 (0.76, 0.83)    | <0.001 | 1.38 (0.93, 1.92) | 1.37 (0.92, 1.95) | -0.03 (-0.06, 0.00)  | 0.085  | 9.53 (6.40, 13.80)   | 15.13 (5.70, 25.31)    | 1.60 (1.06, 2.14)    | <0.001 | 0.18 (0.12, 0.26) | 0.29 (0.11, 0.49) | 1.62 (1.08, 2.16)    | <0.001 |
| <b>Other cardiovascular and circulatory diseases</b> |                     |                      |                      |        |                   |                   |                      |        |                      |                        |                      |        |                   |                   |                      |        |



| 15-19 years                  |   |   |   |   |                       |                       |                   |        |                       |                       |                |        |              |              |                |        |
|------------------------------|---|---|---|---|-----------------------|-----------------------|-------------------|--------|-----------------------|-----------------------|----------------|--------|--------------|--------------|----------------|--------|
| Women                        |   |   |   |   |                       |                       |                   |        |                       |                       |                |        |              |              |                |        |
|                              |   |   |   |   | 299.83                | 394.48                |                   |        |                       |                       | 0.17           |        |              | 0.38         | 0.34           | -0.42  |
| Global                       | — | — | — | — | (165.10, 498.41)      | (212.90, 669.72)      | 0.95 (0.93, 0.98) | <0.001 | 43.74 (34.33, 56.63)  | 45.90 (33.57, 63.66)  | (0.04, 0.30)   | 0.011  | (0.32, 0.44) | (0.29, 0.41) | (-0.59, -0.25) | <0.001 |
| SDI category                 |   |   |   |   |                       |                       |                   |        |                       |                       |                |        |              |              |                |        |
|                              |   |   |   |   | 380.77                | 312.54                |                   |        |                       |                       | -0.69          |        |              | 0.27         | 0.21           | -0.71  |
| High                         | — | — | — | — | (216.67, 604.07)      | (186.75, 487.44)      | (-0.69, -0.58)    | <0.001 | 39.67 (28.87, 54.98)  | 32.10 (23.39, 44.29)  | (-0.81, -0.58) | <0.001 | (0.24, 0.33) | (0.18, 0.29) | (-1.10, -0.32) | <0.001 |
|                              |   |   |   |   | 232.74                | 279.48                |                   |        |                       |                       | -0.18          |        |              | 0.29         | 0.23           | -0.74  |
| High-middle                  | — | — | — | — | (134.72, 371.97)      | (161.12, 443.33)      | 0.65 (0.53, 0.76) | <0.001 | 33.54 (26.50, 43.93)  | 31.95 (22.76, 44.76)  | (-0.45, 0.10)  | 0.205  | (0.25, 0.35) | (0.18, 0.35) | (-1.07, -0.41) | <0.001 |
|                              |   |   |   |   | 237.76                | 340.09                |                   |        |                       |                       | 0.21           |        |              | 0.35         | 0.30           | -0.48  |
| Middle                       | — | — | — | — | (129.05, 395.39)      | (178.21, 581.24)      | 1.24 (1.21, 1.27) | <0.001 | 37.86 (29.84, 48.57)  | 40.13 (29.41, 55.32)  | (0.13, 0.29)   | <0.001 | (0.29, 0.40) | (0.25, 0.37) | (-0.64, -0.32) | <0.001 |
|                              |   |   |   |   | 302.39                | 374.26                |                   |        |                       |                       | -0.18          |        |              | 0.50         | 0.41           | -0.64  |
| Low-middle                   | — | — | — | — | (168.32, 506.15)      | (199.07, 639.81)      | 0.73 (0.71, 0.76) | <0.001 | 52.05 (38.13, 68.85)  | 49.81 (37.11, 67.31)  | (-0.38, 0.02)  | 0.071  | (0.33, 0.65) | (0.33, 0.51) | (-0.85, -0.43) | <0.001 |
|                              |   |   |   |   | 544.72                | 611.73                |                   |        |                       |                       | -0.30          |        |              | 0.57         | 0.43           | -0.93  |
| Low                          | — | — | — | — | (260.33, 981.29)      | (290.67, 1103.29)     | 0.40 (0.39, 0.41) | <0.001 | 69.78 (50.67, 100.11) | 64.06 (43.03, 95.87)  | (-0.38, -0.21) | <0.001 | (0.43, 0.72) | (0.33, 0.56) | (-1.11, -0.74) | <0.001 |
| 21 GBD region                |   |   |   |   |                       |                       |                   |        |                       |                       |                |        |              |              |                |        |
|                              |   |   |   |   | 241.71                | 229.73                |                   |        |                       |                       | -0.63          |        |              | 0.51         | 0.40           | -0.93  |
| South Asia                   | — | — | — | — | (134.29, 407.16)      | (122.45, 392.43)      | (-0.20, -0.15)    | <0.001 | 49.56 (32.02, 65.96)  | 41.17 (30.68, 53.88)  | (-0.90, -0.36) | <0.001 | (0.28, 0.69) | (0.29, 0.51) | (-1.50, -0.35) | 0.002  |
|                              |   |   |   |   | 62.42 (32.02, 105.45) | 89.44 (46.42, 149.80) |                   |        |                       |                       | -0.95          |        |              | 0.18         | 0.11           | -1.88  |
| East Asia                    | — | — | — | — |                       |                       | 1.24 (1.15, 1.33) | <0.001 | 16.58 (11.99, 21.32)  | 12.72 (9.11, 17.77)   | (-1.49, -0.40) | 0.001  | (0.13, 0.23) | (0.08, 0.16) | (-2.51, -1.24) | <0.001 |
|                              |   |   |   |   | 528.17                | 566.02                |                   |        |                       |                       | -0.36          |        |              | 0.72         | 0.57           | -0.75  |
| North Africa and Middle East | — | — | — | — | (300.03, 865.89)      | (311.35, 940.04)      | 0.24 (0.22, 0.25) | <0.001 | 80.23 (60.61, 105.73) | 71.27 (51.45, 98.51)  | (-0.53, -0.18) | <0.001 | (0.55, 0.94) | (0.42, 0.75) | (-0.93, -0.57) | <0.001 |
|                              |   |   |   |   | 986.99                | 1084.10               |                   |        |                       |                       | -0.50          |        |              | 0.58         | 0.33           | -1.99  |
| Western Sub-Saharan Africa   | — | — | — | — | (455.45, 981.29)      | (505.27, 1103.29)     | 0.33 (0.31, 0.35) | <0.001 | 95.21 (61.08, 145.84) | 82.07 (46.49, 137.59) | (-0.56, -0.21) | <0.001 | (0.42, 0.72) | (0.24, 0.56) | (-2.11, -0.74) | <0.001 |



|                        |   |   |   |   |                |                |             |        |               |               |         |        |        |        |              |        |
|------------------------|---|---|---|---|----------------|----------------|-------------|--------|---------------|---------------|---------|--------|--------|--------|--------------|--------|
|                        |   |   |   |   | 309.90)        | 301.49)        | -0.01)      |        |               |               |         |        | -0.92) | 0.28)  | 0.17)        | -1.90) |
|                        |   |   |   |   | 536.47)        | 531.52)        | -0.03)      |        |               |               |         |        | -0.86) | 0.32)  | 0.16)        | -2.38) |
| Central Europe         | — | — | — | — | (315.75,       | (310.50,       | (-0.19,     | 0.743  | 52.59 (37.54, | 40.52 (26.00, | (-1.08, | <0.001 | (0.30, | (0.13, | (-3.02,      | <0.001 |
|                        |   |   |   |   | 829.91)        | 811.78)        | 0.14)       |        | 73.48)        | 61.97)        | -0.64)  |        | 0.36)  | 0.21)  | -1.72)       |        |
| Andean Latin America   | — | — | — | — | 438.87)        | 485.20)        | 0.34 (0.32, | <0.001 | 68.78 (50.83, | 49.65 (33.57, | (-1.47, | <0.001 | (0.47, | (0.22, | (-3.22,      | <0.001 |
|                        |   |   |   |   | (253.80,       | (285.29,       | 0.36)       |        | 91.11)        | 70.70)        | -0.77)  |        | 0.82)  | 0.46)  | -1.43)       |        |
| Caribbean              | — | — | — | — | 240.78)        | 259.10)        | 0.24 (0.20, | <0.001 | 54.31 (41.72, | 58.60 (39.27, | 0.43)   | <0.001 | 0.58)  | 0.62)  | 0.52 (0.24,  | <0.001 |
|                        |   |   |   |   | (141.35,       | (152.12,       | 0.28)       |        | 72.36)        | 85.60)        | 0.63)   |        | (0.43, | (0.39, | 0.80)        |        |
| Southern Latin America | — | — | — | — | 365.05)        | 411.22)        | 0.42 (0.39, | <0.001 | 54.41 (39.55, | 46.43 (32.48, | -0.54)  | 0.002  | 0.48)  | 0.34)  | -1.23)       | <0.001 |
|                        |   |   |   |   | (215.53,       | (235.64,       | 0.44)       |        | 72.72)        | 64.22)        | (-0.88, |        | (0.36, | (0.25, | (-1.79,      | <0.001 |
| Oceania                | — | — | — | — | 175.32 (99.93, | 157.62 (88.74, | -0.37)      | <0.001 | 38.71 (24.98, | 38.57 (24.67, | -0.08)  | 0.713  | 0.41)  | 0.42)  | 0.00 (-0.58, | 0.991  |
|                        |   |   |   |   | 290.35)        | 261.04)        | -0.35)      |        | 57.97)        | 58.28)        | 0.37)   |        | 0.66)  | 0.68)  | 0.59)        |        |
| Australasia            | — | — | — | — | 144.24 (81.72, | 131.09 (74.91, | -0.32)      | <0.001 | 20.88 (14.59, | 17.52 (11.84, | -0.65)  | 0.112  | 0.18)  | 0.15)  | -0.66)       | 0.402  |
|                        |   |   |   |   | 225.97)        | 213.14)        | -0.28)      |        | 29.37)        | 25.53)        | (-1.44, |        | (0.14, | (0.10, | (-2.17,      |        |
|                        |   |   |   |   |                |                |             |        |               |               | 0.15)   |        | 0.28)  | 0.21)  | 0.88)        |        |
| <b>Men</b>             |   |   |   |   |                |                |             |        |               |               |         |        |        |        |              |        |
| Global                 | — | — | — | — | 240.08)        | 331.75)        | 1.12 (1.09, | <0.001 | 38.04 (29.30, | 41.88 (30.32, | 0.32)   | <0.001 | 0.35)  | 0.33)  | -0.22)       | 0.018  |
|                        |   |   |   |   | (132.64,       | (175.89,       | 1.14)       |        | 49.92)        | 57.88)        | (0.16,  |        | (0.29, | (0.27, | (-0.41,      |        |
|                        |   |   |   |   | 400.48)        | 561.24)        |             |        |               |               | 0.48)   |        | 0.43)  | 0.41)  | -0.04)       |        |
| <b>SDI category</b>    |   |   |   |   |                |                |             |        |               |               |         |        |        |        |              |        |
| High                   | — | — | — | — | 190.40)        | 156.81 (95.83, | -0.66)      | <0.001 | 26.26 (20.71, | 18.43 (13.85, | -1.21)  | <0.001 | 0.22)  | 0.14)  | -1.60)       | <0.001 |
|                        |   |   |   |   | (111.42,       | 248.13)        | (-0.69,     |        | 34.83)        | 24.84)        | (-1.34, |        | (0.19, | (0.12, | (-1.84,      | <0.001 |
|                        |   |   |   |   | 308.14)        |                | -0.63)      |        |               |               | -1.08)  |        | 0.26)  | 0.18)  | -1.36)       |        |
| High-middle            | — | — | — | — | 182.93)        | 219.54)        | 0.63 (0.59, | <0.001 | 34.10 (26.90, | 27.26 (20.02, | -0.78)  | <0.001 | 0.34)  | 0.21)  | -1.59)       | <0.001 |
|                        |   |   |   |   | (106.17,       | (130.02,       | 0.68)       |        | 42.83)        | 37.99)        | (-1.04, |        | (0.27, | (0.17, | (-2.03,      | <0.001 |
|                        |   |   |   |   | 295.50)        | 358.71)        |             |        |               |               | -0.52)  |        | 0.41)  | 0.31)  | -1.15)       |        |
| Middle                 | — | — | — | — | 218.19)        | 316.10)        | 1.28 (1.26, | <0.001 | 34.95 (25.68, | 38.83 (28.24, | 0.36)   | <0.001 | 0.32)  | 0.30)  | -0.22)       | 0.049  |
|                        |   |   |   |   | (119.85,       | (169.16,       | 1.31)       |        | 46.83)        | 55.08)        | (0.21,  |        | (0.25, | (0.24, | (-0.43,      | 0.049  |
|                        |   |   |   |   | 366.84)        | 536.28)        |             |        |               |               | 0.51)   |        | 0.42)  | 0.40)  | -0.00)       |        |





|                      |   |   |   |   |                |                |             |        |               |               |         |        |        |        |         |        |
|----------------------|---|---|---|---|----------------|----------------|-------------|--------|---------------|---------------|---------|--------|--------|--------|---------|--------|
|                      |   |   |   |   | 351.71)        | 336.78)        | -0.15)      |        |               |               | 0.24)   | 0.89)  | 0.97)  |        |         |        |
|                      |   |   |   |   | 66.51 (38.92,  | 58.57 (35.30,  | -0.44       |        |               |               | -1.08   | 0.14   | 0.09   | -1.32  |         |        |
| Australasia          | — | — | — | — | 109.68)        | 94.10)         | (-0.46,     | <0.001 | 13.36 (9.57,  | 9.69 (6.46,   | (-1.76, | 0.002  | (0.10, | (0.06, | (-2.27, | 0.007  |
|                      |   |   |   |   |                |                | -0.42)      |        | 19.85)        | 14.19)        | -0.40)  |        | 0.22)  | 0.13)  | -0.36)  |        |
| <b>20-24 years</b>   |   |   |   |   |                |                |             |        |               |               |         |        |        |        |         |        |
| <b>Women</b>         |   |   |   |   |                |                |             |        |               |               |         |        |        |        |         |        |
|                      |   |   |   |   | 260.95         | 327.10         |             |        |               |               | -0.04   |        | 0.57   | 0.51   | -0.38   |        |
| Global               | — | — | — | — | (143.01,       | (171.31,       | 0.80 (0.74, | <0.001 | 52.02 (42.07, | 51.52 (40.55, | (-0.12, | 0.321  | (0.45, | (0.43, | (-0.62, | 0.003  |
|                      |   |   |   |   | 432.85)        | 554.00)        | 0.85)       |        | 65.27)        | 67.31)        | 0.04)   |        | 0.66)  | 0.60)  | -0.12)  |        |
| <b>SDI category</b>  |   |   |   |   |                |                |             |        |               |               |         |        |        |        |         |        |
|                      |   |   |   |   | 475.62         | 393.37         | -0.62       |        |               |               | -0.69   |        | 0.41   | 0.33   | -0.71   |        |
| High                 | — | — | — | — | (286.03,       | (243.73,       | (-0.67,     | <0.001 | 52.92 (40.13, | 43.36 (32.57, | (-0.93, | <0.001 | (0.38, | (0.29, | (-0.92, | <0.001 |
|                      |   |   |   |   | 736.99)        | 598.56)        | -0.57)      |        | 72.67)        | 58.79)        | -0.45)  |        | 0.48)  | 0.42)  | -0.49)  |        |
|                      |   |   |   |   | 205.95         | 251.27         |             |        |               |               | -0.35   |        | 0.41   | 0.31   | -0.90   |        |
| High-middle          | — | — | — | — | (121.77,       | (147.58,       | 0.69 (0.65, | <0.001 | 38.43 (31.71, | 34.61 (25.97, | (-0.61, | 0.010  | (0.36, | (0.25, | (-1.19, | <0.001 |
|                      |   |   |   |   | 320.68)        | 392.21)        | 0.73)       |        | 47.72)        | 47.19)        | -0.08)  |        | 0.47)  | 0.46)  | -0.61)  |        |
|                      |   |   |   |   | 194.61         | 281.93         |             |        |               |               | -0.00   |        | 0.49   | 0.41   | -0.52   |        |
| Middle               | — | — | — | — | (103.88,       | (145.84,       | 1.30 (1.24, | <0.001 | 42.91 (35.12, | 42.81 (33.20, | (-0.12, | 0.959  | (0.39, | (0.33, | (-0.78, | <0.001 |
|                      |   |   |   |   | 327.84)        | 483.81)        | 1.37)       |        | 52.97)        | 56.59)        | 0.11)   |        | 0.56)  | 0.50)  | -0.25)  |        |
|                      |   |   |   |   | 221.34         | 280.33         |             |        |               |               | -0.38   |        | 0.79   | 0.65   | -0.72   |        |
| Low-middle           | — | — | — | — | (115.37,       | (141.64,       | 0.81 (0.79, | <0.001 | 64.71 (45.55, | 58.16 (44.29, | (-0.75, | 0.044  | (0.51, | (0.50, | (-1.20, | 0.003  |
|                      |   |   |   |   | 376.00)        | 480.74)        | 0.84)       |        | 82.70)        | 74.11)        | -0.01)  |        | 1.02)  | 0.80)  | -0.25)  |        |
|                      |   |   |   |   | 431.48         | 502.23         |             |        |               |               | -0.52   |        | 0.96   | 0.72   | -1.00   |        |
| Low                  | — | — | — | — | (186.08,       | (216.50,       | 0.53 (0.50, | <0.001 | 87.29 (64.33, | 74.89 (55.14, | (-0.59, | <0.001 | (0.69, | (0.56, | (-1.10, | <0.001 |
|                      |   |   |   |   | 805.32)        | 922.45)        | 0.55)       |        | 115.38)       | 104.15)       | -0.46)  |        | 1.24)  | 0.89)  | -0.91)  |        |
| <b>21 GBD region</b> |   |   |   |   |                |                |             |        |               |               |         |        |        |        |         |        |
|                      |   |   |   |   | 167.22 (85.59, | 157.51 (79.77, | -0.21       |        |               |               | -0.86   |        | 0.83   | 0.64   | -0.98   |        |
| South Asia           | — | — | — | — | 284.19)        | 270.57)        | (-0.25,     | <0.001 | 64.46 (38.53, | 51.17 (36.42, | (-1.36, | 0.001  | (0.45, | (0.44, | (-1.56, | 0.001  |
|                      |   |   |   |   |                |                | -0.18)      |        | 86.50)        | 66.43)        | -0.35)  |        | 1.14)  | 0.84)  | -0.39)  |        |
|                      |   |   |   |   | 58.83 (29.91,  | 86.70 (43.55,  | 1.34 (1.25, | <0.001 | 18.54 (13.82, | 14.60 (10.48, | -0.65   |        | 0.23   | 0.15   | -1.30   |        |
| East Asia            | — | — | — | — | 99.05)         | 146.64)        | 1.43)       |        | 24.47)        | 20.44)        | (-1.02, | 0.001  | (0.16, | (0.10, | (-1.72, | <0.001 |
|                      |   |   |   |   |                |                |             |        |               |               | -0.27)  |        | 0.31)  | 0.21)  | -0.87)  |        |
| North Africa and     | — | — | — | — | 485.34         | 519.62         | 0.24 (0.20, | <0.001 | 97.98 (75.43, | 80.52 (59.96, | -0.67   | <0.001 | 1.08   | 0.79   | -1.08   | <0.001 |

|                            |   |   |   |   |                        |                         |                      |        |                       |                       |                |        |              |              |                    |        |
|----------------------------|---|---|---|---|------------------------|-------------------------|----------------------|--------|-----------------------|-----------------------|----------------|--------|--------------|--------------|--------------------|--------|
| Middle East                |   |   |   |   | (271.48, 796.59)       | (284.60, 867.29)        | 0.27                 |        | 126.25                | 107.74                | (-0.80, -0.53) |        | (0.84, 1.36) | (0.59, 1.05) | (-1.27, -0.88)     |        |
|                            |   |   |   |   | 826.90                 | 958.93                  |                      |        | 119.06                |                       | -0.68          |        | 1.12         | 0.69         | -1.68              |        |
| Western Sub-Saharan Africa | — | — | — | — | (346.98, 1546.03)      | (401.91, 1757.42)       | 0.52 (0.49, 0.54)    | <0.001 | (84.40, 168.84)       | 97.34 (62.19, 148.42) | (-0.77, -0.60) | <0.001 | (0.82, 1.54) | (0.49, 0.97) | (-1.78, -1.59)     | <0.001 |
|                            |   |   |   |   | 165.68 (95.16, 264.97) | 172.43 (100.04, 272.86) | 0.14 (0.12, 0.16)    | <0.001 | 41.50 (30.69, 52.83)  | 33.04 (25.84, 41.93)  | (-0.94, -0.61) | <0.001 | (0.35, 0.62) | (0.27, 0.46) | (-1.29, -0.89)     | <0.001 |
| Eastern Sub-Saharan Africa | — | — | — | — | (220.41, 1014.92)      | (251.24, 1143.86)       | 0.47 (0.44, 0.50)    | <0.001 | (70.18, 137.02)       | 82.10 (55.67, 118.56) | (-0.84, -0.55) | <0.001 | (0.75, 1.49) | (0.50, 1.05) | (-1.49, -1.12)     | <0.001 |
|                            |   |   |   |   | 533.31                 | 610.88                  |                      |        | 100.22                |                       | -0.69          |        | 1.08         | 0.74         | -1.31              |        |
| Central Latin America      | — | — | — | — | (214.31, 562.68)       | (227.15, 606.19)        | 0.25 (0.21, 0.30)    | <0.001 | (56.14, 71.49)        | (45.52, 64.82)        | (-0.67, -0.33) | <0.001 | (0.50, 0.61) | (0.30, 0.52) | (-1.34, -0.61)     | <0.001 |
|                            |   |   |   |   | 342.35                 | 365.62                  |                      |        | 58.99 (47.87, 75.01)  | 56.67 (44.36, 75.65)  | (-0.11, -0.41) | 0.498  | 0.61         | 0.56         | -0.20              |        |
| Tropical Latin America     | — | — | — | — | (172.21, 586.03)       | (182.80, 624.43)        | 0.23 (0.21, 0.26)    | <0.001 | (58.99, 75.01)        | (47.87, 75.65)        | (-0.41, 0.20)  | 0.498  | (0.55, 0.68) | (0.47, 0.68) | (-0.67, 0.28)      | 0.411  |
|                            |   |   |   |   | 566.59                 | 610.67                  |                      |        | 75.07 (45.37, 113.63) | 68.00 (40.51, 107.74) | (-0.35, -0.26) | <0.001 | 0.67         | 0.53         | -0.89              |        |
| Central Sub-Saharan Africa | — | — | — | — | (224.32, 1071.38)      | (245.84, 1206.27)       | 0.28 (0.18, 0.37)    | <0.001 | (75.07, 113.63)       | (40.51, 107.74)       | (-0.44, -0.26) | <0.001 | (0.39, 1.09) | (0.31, 0.86) | (-1.00, -0.79)     | <0.001 |
|                            |   |   |   |   | 467.12                 | 440.17                  | -0.21                |        | 51.84 (39.32, 69.06)  | 41.41 (29.61, 58.44)  | (-0.78, -0.67) | <0.001 | 0.40         | 0.27         | -1.40              |        |
| Western Europe             | — | — | — | — | (282.63, 707.52)       | (268.87, 662.42)        | (-0.24, -0.17)       | <0.001 | (51.84, 69.06)        | (39.32, 58.44)        | (-0.89, -0.67) | <0.001 | (0.36, 0.48) | (0.23, 0.35) | (-1.70, -1.11)     | <0.001 |
|                            |   |   |   |   | 626.87                 | 423.74                  | -1.31                |        | 63.69 (45.35, 91.73)  | 52.29 (39.67, 70.72)  | (-0.71, -0.47) | <0.001 | 0.45         | 0.44         | -0.16              |        |
| High-income North America  | — | — | — | — | (332.55, 1046.12)      | (236.75, 682.67)        | (-1.36, -1.25)       | <0.001 | (63.69, 91.73)        | (39.67, 70.72)        | (-0.94, -0.47) | <0.001 | (0.41, 0.52) | (0.39, 0.55) | (-0.62, 0.31)      | 0.507  |
|                            |   |   |   |   | 119.16 (71.48, 186.80) | 111.06 (67.93, 172.96)  | -0.23 (-0.28, -0.19) | <0.001 | 53.36 (39.52, 63.05)  | 37.35 (26.05, 59.53)  | (-1.30, -0.94) | <0.001 | 0.70         | 0.47         | -1.44              |        |
| Central Asia               | — | — | — | — | 140.41 (71.84, 239.40) | 142.74 (72.32, 242.84)  | 0.06 (0.04, 0.08)    | <0.001 | 31.97 (24.67, 39.28)  | 34.55 (24.46, 60.37)  | (-0.42, 0.94)  | 0.458  | (0.27, 0.44) | (0.28, 0.79) | 0.32 (-0.55, 1.20) | 0.474  |
|                            |   |   |   |   | 337.47                 | 360.85                  | 0.23 (0.20, 0.26)    | <0.001 | 53.17 (38.78, 69.56)  | 45.71 (29.08, 62.04)  | (-0.50, -0.26) | 0.131  | 0.53         | 0.39         | -0.95              | 0.114  |
| Southern Europe            | — | — | — | — | 337.47                 | 360.85                  | 0.23 (0.20, 0.26)    | <0.001 | 53.17 (38.78, 69.56)  | 45.71 (29.08, 62.04)  | (-0.50, -0.26) | 0.131  | 0.53         | 0.39         | -0.95              | 0.114  |

|                          |   |   |   |   |                         |                         |                    |        |                       |                       |                       |        |                    |                    |                       |        |
|--------------------------|---|---|---|---|-------------------------|-------------------------|--------------------|--------|-----------------------|-----------------------|-----------------------|--------|--------------------|--------------------|-----------------------|--------|
| Sub-Saharan Africa       |   |   |   |   | (141.17, 631.33)        | (150.61, 658.45)        | 0.26               |        | 72.90                 | 69.35                 | (-1.14, 0.15)         |        | (0.41, 0.67)       | (0.25, 0.61)       | (-2.13, 0.23)         |        |
|                          |   |   |   |   | 264.74                  | 259.63                  | -0.07              |        |                       |                       | -1.33                 |        | 0.29               | 0.13               | -2.71                 |        |
| High-income Asia Pacific | — | — | — | — | (147.23, 427.90)        | (147.21, 412.12)        | (-0.10, -0.03)     | <0.001 | 33.40 (25.13, 44.75)  | 22.81 (14.97, 34.13)  | (-1.55, -1.11)        | <0.001 | (0.23, 0.38)       | (0.10, 0.22)       | (-3.13, -2.29)        | <0.001 |
|                          |   |   |   |   | 531.12                  | 545.60                  | 0.11 (-0.03, 0.24) | 0.115  | 65.39 (51.14, 86.66)  | 46.76 (32.57, 68.39)  | (-1.32, -0.92)        | <0.001 | (0.51, 0.60)       | (0.19, 0.33)       | (-2.94, -2.55)        | <0.001 |
| Central Europe           | — | — | — | — | (326.71, 796.24)        | (335.14, 831.46)        | 0.37 (0.33, 0.40)  | <0.001 | 85.01 (65.21, 109.44) | 51.81 (36.34, 71.14)  | (-2.17, -1.14)        | <0.001 | (0.74, 1.29)       | (0.31, 0.65)       | (-3.37, -1.80)        | <0.001 |
| Andean Latin America     | — | — | — | — | (205.65, 558.05)        | (236.05, 625.24)        | 0.32 (0.28, 0.37)  | <0.001 | 77.64 (56.70, 104.21) | 88.03 (56.57, 132.32) | (0.17, 0.76)          | 0.002  | (0.67, 1.37)       | (0.67, 1.79)       | 0.50 (0.04, 0.97)     | 0.034  |
| Caribbean                | — | — | — | — | (138.21, 352.11)        | (151.30, 384.90)        | 0.36 (0.32, 0.40)  | <0.001 | 67.93 (54.40, 86.93)  | 52.84 (39.35, 72.35)  | (-0.80, -0.41)        | <0.001 | (0.72, 0.86)       | (0.46, 0.61)       | (-1.42, -0.88)        | <0.001 |
| Southern Latin America   | — | — | — | — | (216.56, 572.19)        | (238.38, 632.02)        | -0.40              | <0.001 | 30.18 (19.80, 45.30)  | 28.26 (16.97, 44.88)  | (-0.50, 0.01)         | 0.060  | (0.26, 0.64)       | (0.22, 0.64)       | (-0.51, 0.04)         | 0.097  |
| Oceania                  | — | — | — | — | 42.16 (23.87, 67.77)    | 37.59 (21.34, 60.34)    | -0.31              | <0.001 | 26.50 (18.94, 37.30)  | 23.51 (16.40, 33.27)  | (-1.30, 0.55)         | 0.422  | (0.19, 0.38)       | (0.16, 0.30)       | (-1.85, 0.80)         | 0.433  |
| Australasia              | — | — | — | — | (100.97, 270.29)        | 157.31 (93.16, 240.99)  | -0.28              | <0.001 |                       |                       |                       |        |                    |                    |                       |        |
| <b>Men</b>               |   |   |   |   |                         |                         |                    |        |                       |                       |                       |        |                    |                    |                       |        |
| Global                   | — | — | — | — | 172.46 (88.48, 299.23)  | 230.35 (114.57, 407.62) | 1.01 (0.97, 1.05)  | <0.001 | 40.30 (32.17, 50.92)  | 43.16 (33.51, 56.15)  | (0.24, 0.09, 0.40)    | 0.002  | (0.46, 0.38, 0.58) | (0.46, 0.38, 0.56) | (-0.03, -0.23, 0.17)  | 0.780  |
| <b>SDI category</b>      |   |   |   |   |                         |                         |                    |        |                       |                       |                       |        |                    |                    |                       |        |
| High                     | — | — | — | — | 193.39 (108.26, 311.90) | 167.89 (96.63, 261.94)  | -0.46              | <0.001 | 30.31 (24.37, 39.08)  | 24.61 (19.35, 32.23)  | (-0.73, -0.95, -0.51) | <0.001 | (0.30, 0.27, 0.34) | (0.23, 0.21, 0.29) | (-0.86, -1.14, -0.58) | <0.001 |
| High-middle              | — | — | — | — | 138.12 (76.70, 222.79)  | 173.09 (96.98, 279.08)  | 0.80 (0.70, 0.90)  | <0.001 | 37.18 (30.61, 44.88)  | 30.03 (23.42, 40.60)  | (-0.73, -0.91, 0.55)  | <0.001 | (0.44, 0.37, 0.51) | (0.31, 0.26, 0.36) | (-1.27, -1.65, 0.80)  | <0.001 |





|                     |   |   |   |   |                |                |             |        |               |               |         |        |        |              |         |        |
|---------------------|---|---|---|---|----------------|----------------|-------------|--------|---------------|---------------|---------|--------|--------|--------------|---------|--------|
| America             |   |   |   |   | 308.08)        | 325.54)        | 0.26)       |        | 53.91)        | 49.79)        | (-0.60, | (0.45, | (0.38, | (-0.87,      |         |        |
|                     |   |   |   |   |                |                |             |        |               |               | -0.02)  | 0.59)  | 0.51)  | -0.11)       |         |        |
| Central Sub-Saharan |   |   |   |   | 342.93         | 362.54         | 0.20 (0.16, |        | 63.65 (39.32, | 59.78 (36.04, | -0.24   | 0.68   | 0.60   | -0.46        |         |        |
| Africa              | — | — | — | — | (131.26,       | (137.57,       | 0.24)       | <0.001 | 100.11)       | 93.60)        | (-0.30, | <0.001 | (0.40, | (0.34,       | (-0.62, | <0.001 |
|                     |   |   |   |   | 669.90)        | 742.15)        |             |        |               |               | -0.18)  |        | 1.14)  | 1.02)        | -0.31)  |        |
|                     |   |   |   |   | 188.98         | 181.59         | -0.15       |        | 33.40 (27.41, | 21.96 (16.37, | -1.48   | 0.35   | 0.18   | -2.29        |         |        |
| Western Europe      | — | — | — | — | (111.44,       | (107.08,       | (-0.21,     | <0.001 | 42.28)        | 30.42)        | (-1.71, | <0.001 | (0.31, | (0.16,       | (-2.65, | <0.001 |
|                     |   |   |   |   | 297.79)        | 285.90)        | -0.09)      |        |               |               | -1.25)  |        | 0.41)  | 0.24)        | -1.94)  |        |
|                     |   |   |   |   | 246.94         | 169.77 (86.57, | -1.25       |        | 33.36 (25.20, | 30.74 (24.87, | -0.29   | 0.30   | 0.32   | 0.29 (-0.37, |         |        |
| High-income North   | — | — | — | — | (119.85,       | 281.61)        | (-1.36,     | <0.001 | 45.15)        | 39.07)        | (-0.79, | 0.248  | (0.26, | (0.28,       | 0.96)   | 0.387  |
| America             |   |   |   |   | 427.44)        |                | -1.14)      |        |               |               | 0.20)   |        | 0.34)  | 0.38)        |         |        |
|                     |   |   |   |   | 109.32 (63.22, | 111.73 (63.39, | 0.07 (0.06, |        | 53.91 (42.55, | 41.76 (32.27, | -0.92   | 0.72   | 0.54   | -1.10        |         |        |
| Central Asia        | — | — | — | — | 175.37)        | 183.84)        | 0.09)       | <0.001 | 63.57)        | 58.38)        | (-1.26, | <0.001 | (0.57, | (0.40,       | (-1.48, | <0.001 |
|                     |   |   |   |   |                |                |             |        |               |               | -0.58)  |        | 0.86)  | 0.80)        | -0.72)  |        |
|                     |   |   |   |   | 71.73 (34.08,  | 78.41 (37.61,  | 0.31 (0.27, |        | 31.58 (25.37, | 37.79 (27.73, | 0.34    | 0.41   | 0.50   | 0.35 (-0.18, |         |        |
| Eastern Europe      | — | — | — | — | 123.90)        | 137.28)        | 0.34)       | <0.001 | 39.47)        | 70.88)        | (-0.14, | 0.165  | (0.32, | (0.36,       | 0.88)   | 0.197  |
|                     |   |   |   |   |                |                |             |        |               |               | 0.82)   |        | 0.53)  | 0.99)        |         |        |
|                     |   |   |   |   | 303.35         | 313.71         | 0.11 (0.09, |        | 42.27 (28.38, | 50.89 (33.84, | 0.70    | 0.39   | 0.51   | 1.03 (0.44,  |         |        |
| Southern            | — | — | — | — | (118.57,       | (123.54,       | 0.13)       | <0.001 | 61.20)        | 76.83)        | (0.30,  | 0.001  | (0.28, | (0.33,       | 1.62)   | 0.001  |
| Sub-Saharan Africa  |   |   |   |   | 596.65)        | 608.99)        |             |        |               |               | 1.10)   |        | 0.53)  | 0.75)        |         |        |
|                     |   |   |   |   | 144.84 (77.01, | 143.90 (76.34, | -0.03       |        | 24.02 (18.30, | 15.93 (11.17, | -1.39   | 0.24   | 0.12   | -2.35        |         |        |
| High-income Asia    | — | — | — | — | 243.24)        | 240.22)        | (-0.07,     | 0.152  | 31.51)        | 23.69)        | (-1.62, | <0.001 | (0.19, | (0.10,       | (-2.66, | <0.001 |
| Pacific             |   |   |   |   |                |                | 0.01)       |        |               |               | -1.17)  |        | 0.29)  | 0.15)        | -2.03)  |        |
|                     |   |   |   |   | 306.12         | 319.12         | 0.15 (0.10, |        | 55.79 (46.33, | 36.27 (26.48, | -1.50   | 0.59   | 0.28   | -2.58        |         |        |
| Central Europe      | — | — | — | — | (180.59,       | (185.39,       | 0.19)       | <0.001 | 69.19)        | 51.07)        | (-1.76, | <0.001 | (0.53, | (0.22,       | (-3.01, | <0.001 |
|                     |   |   |   |   | 486.87)        | 507.51)        |             |        |               |               | -1.24)  |        | 0.65)  | 0.36)        | -2.13)  |        |
|                     |   |   |   |   | 316.85         | 360.70         | 0.45 (0.42, |        | 99.39 (72.31, | 56.33 (39.74, | -1.75   | 1.23   | 0.55   | -2.53        |         |        |
| Andean Latin        | — | — | — | — | (181.78,       | (200.75,       | 0.48)       | <0.001 | 131.12)       | 78.49)        | (-2.14, | <0.001 | (0.86, | (0.36,       | (-3.01, | <0.001 |
| America             |   |   |   |   | 515.30)        | 606.54)        |             |        |               |               | -1.36)  |        | 1.68)  | 0.80)        | -2.06)  |        |
|                     |   |   |   |   | 192.80         | 228.77         | 0.59 (0.58, |        | 53.78 (41.91, | 58.01 (40.65, | 0.29    | 0.65   | 0.68   | 0.22 (-0.24, |         |        |
| Caribbean           | — | — | — | — | (108.96,       | (130.69,       | 0.61)       | <0.001 | 69.14)        | 81.61)        | (-0.05, | 0.093  | (0.50, | (0.46,       | 0.68)   | 0.347  |
|                     |   |   |   |   | 304.10)        | 374.39)        |             |        |               |               | 0.64)   |        | 0.85)  | 1.02)        |         |        |
|                     |   |   |   |   | 184.45         | 214.20         | 0.50 (0.46, | <0.001 | 43.80 (34.97, | 36.20 (27.52, | -0.67   | <0.001 | 0.51   | 0.37         | -1.10   | <0.001 |

|                      |   |   |   |   |                        |                        |                   |        |                       |                       |                |        |              |              |                |        |
|----------------------|---|---|---|---|------------------------|------------------------|-------------------|--------|-----------------------|-----------------------|----------------|--------|--------------|--------------|----------------|--------|
| America              |   |   |   |   | (105.57, 301.51)       | (121.92, 358.70)       | 0.55              |        | 55.77)                | 47.80)                | (-1.04, -0.30) |        | (0.40, 0.63) | (0.29, 0.46) | (-1.62, -0.58) |        |
|                      |   |   |   |   |                        |                        | -0.30             |        |                       |                       |                |        | 1.29         | 1.17         | -0.42          |        |
| Oceania              | — | — | — | — | 150.59 (78.83, 260.33) | 137.94 (73.21, 239.17) | (-0.33, -0.28)    | <0.001 | 94.06 (61.94, 138.96) | 85.50 (53.94, 136.07) | (-0.62, -0.20) | <0.001 | (0.80, 1.97) | (0.71, 1.93) | (-0.66, -0.19) | 0.001  |
|                      |   |   |   |   |                        |                        | -0.21             |        |                       |                       |                |        | 0.21         | 0.16         | -0.84          |        |
| Australasia          | — | — | — | — | 100.12 (57.65, 163.73) | 93.94 (54.54, 151.95)  | (-0.24, -0.19)    | <0.001 | 19.23 (13.94, 26.28)  | 15.52 (10.46, 22.12)  | (-0.97, -0.39) | <0.001 | (0.16, 0.27) | (0.11, 0.22) | (-1.24, -0.44) | <0.001 |
| <b>25-29 years</b>   |   |   |   |   |                        |                        |                   |        |                       |                       |                |        |              |              |                |        |
| <b>Women</b>         |   |   |   |   |                        |                        |                   |        |                       |                       |                |        |              |              |                |        |
|                      |   |   |   |   | 333.51                 | 361.10                 | 0.27 (0.22, 0.32) | <0.001 | 62.28 (50.36, 77.39)  | 57.37 (45.63, 72.71)  | (-0.27, -0.05) | 0.018  | 0.72         | 0.62         | -0.54          |        |
| Global               | — | — | — | — | (187.57, 539.34)       | (194.62, 597.71)       |                   |        |                       |                       |                |        | (0.58, 0.84) | (0.52, 0.72) | (-0.92, -0.14) | 0.007  |
| <b>SDI category</b>  |   |   |   |   |                        |                        |                   |        |                       |                       |                |        |              |              |                |        |
|                      |   |   |   |   | 716.47                 | 600.64                 | -0.60             |        | 73.35 (54.53, 99.43)  | 63.96 (48.12, 84.76)  | (-0.46, -0.31) | <0.001 | 0.57         | 0.52         | -0.31          |        |
| High                 | — | — | — | — | (434.41, 1101.34)      | (379.00, 883.70)       | (-0.63, -0.56)    | <0.001 |                       |                       |                |        | (0.52, 0.66) | (0.45, 0.66) | (-0.52, -0.10) | 0.004  |
|                      |   |   |   |   |                        |                        | 0.43 (0.36, 0.50) | <0.001 | 43.82 (36.18, 53.85)  | 38.28 (28.78, 51.31)  | (-0.45, 0.04)  | 0.073  | 0.48         | 0.36         | -0.96          |        |
| High-middle          | — | — | — | — | (153.59, 405.32)       | (175.31, 452.78)       |                   |        |                       |                       |                |        | (0.42, 0.54) | (0.30, 0.51) | (-1.88, -0.03) | 0.043  |
|                      |   |   |   |   |                        |                        | 0.82 (0.76, 0.87) | <0.001 | 49.49 (40.33, 60.16)  | 45.04 (35.90, 57.15)  | (-0.29, -0.00) | 0.049  | 0.61         | 0.48         | -0.81          |        |
| Middle               | — | — | — | — | (121.12, 364.17)       | (153.07, 468.69)       |                   |        |                       |                       |                |        | (0.48, 0.69) | (0.40, 0.57) | (-1.20, -0.42) | <0.001 |
|                      |   |   |   |   |                        |                        | 0.62 (0.59, 0.65) | <0.001 | 74.28 (54.34, 96.80)  | 66.73 (51.69, 82.84)  | (-0.35, 0.06)  | 0.093  | 0.98         | 0.81         | -0.62          |        |
| Low-middle           | — | — | — | — | (130.70, 426.87)       | (153.01, 521.59)       |                   |        |                       |                       |                |        | (0.68, 1.29) | (0.64, 1.00) | (-1.19, -0.06) | 0.031  |
|                      |   |   |   |   |                        |                        | 0.58 (0.55, 0.60) | <0.001 | 111.84                | 86.99 (65.51, 117.05) | (-0.86, -0.77) | <0.001 | 1.44         | 0.96         | -1.39          |        |
| Low                  | — | — | — | — | (193.48, 836.98)       | (229.70, 978.63)       |                   |        |                       |                       |                |        | (1.01, 1.84) | (0.76, 1.20) | (-1.48, -1.31) | <0.001 |
| <b>21 GBD region</b> |   |   |   |   |                        |                        |                   |        |                       |                       |                |        |              |              |                |        |
|                      |   |   |   |   | 212.17                 | 197.15                 | -0.26             |        | 72.90 (47.70, 97.28)  | 61.54 (46.33, 78.62)  | (-0.50, -0.13) | 0.119  | 1.00         | 0.83         | -0.55          |        |
| South Asia           | — | — | — | — | (107.22, 353.58)       | (100.66, 331.25)       | (-0.31, -0.22)    | <0.001 |                       |                       |                |        | (0.61, 1.38) | (0.61, 1.08) | (-1.29, 0.19)  | 0.143  |

|                              |   |   |   |   |                |                |             |        |               |                |         |        |        |        |             |        |
|------------------------------|---|---|---|---|----------------|----------------|-------------|--------|---------------|----------------|---------|--------|--------|--------|-------------|--------|
|                              |   |   |   |   | 76.21 (42.52,  | 113.08 (62.09, | 1.35 (1.30, |        | 20.50 (15.00, | 15.11 (10.92,  | -1.17   | 0.26   | 0.14   | -2.02  |             |        |
| East Asia                    | — | — | — | — | 123.04)        | 182.43)        | 1.40)       | <0.001 | 26.82)        | 21.27)         | (-2.68, | 0.132  | (0.18, | (0.10, | (-3.75,     | 0.026  |
|                              |   |   |   |   |                |                |             |        |               |                | 0.35)   |        | 0.35)  | 0.20)  | -0.25)      |        |
|                              |   |   |   |   | 501.09         | 517.55         |             |        |               |                | -0.46   |        | 1.12   | 0.90   | -0.74       |        |
| North Africa and Middle East | — | — | — | — | (266.06,       | (278.11,       | 0.11 (0.09, | <0.001 | 95.71 (74.02, | 82.95 (62.66,  | (-0.63, | <0.001 | (0.83, | (0.67, | (-0.97,     | <0.001 |
|                              |   |   |   |   | 803.91)        | 825.09)        | 0.13)       |        | 119.15)       | 110.11)        | -0.30)  |        | 1.37)  | 1.18)  | -0.51)      |        |
|                              |   |   |   |   | 718.86         | 866.31         |             |        |               |                | -0.97   |        | 1.47   | 0.82   | -2.02       |        |
| Western Sub-Saharan Africa   | — | — | — | — | (318.05,       | (386.39,       | 0.65 (0.61, | <0.001 | 128.84        | 96.80 (63.74,  | (-1.01, | <0.001 | (1.03, | (0.59, | (-2.13,     | <0.001 |
|                              |   |   |   |   | 1352.45)       | 1621.83)       | 0.68)       |        | (90.32,       | 145.89)        | -0.94)  |        | (1.03, | (0.59, | (-2.13,     | <0.001 |
|                              |   |   |   |   | 211.04         | 219.20         |             |        |               |                | -0.94   |        | 0.68   | 0.46   | -1.30       |        |
| Southeast Asia               | — | — | — | — | (117.13,       | (125.66,       | 0.13 (0.12, | <0.001 | 53.09 (39.68, | 40.29 (31.15,  | (-1.11, | <0.001 | (0.47, | (0.35, | (-1.53,     | <0.001 |
|                              |   |   |   |   | 324.32)        | 336.85)        | 0.15)       |        | 65.66)        | 50.77)         | -0.76)  |        | 0.85)  | 0.59)  | -1.07)      |        |
|                              |   |   |   |   | 593.93         | 707.64         |             |        |               |                | -1.17   |        | 1.89   | 1.10   | -1.86       |        |
| Eastern Sub-Saharan Africa   | — | — | — | — | (248.19,       | (307.00,       | 0.61 (0.56, | <0.001 | 148.29        | 105.48 (73.75, | (-1.34, | <0.001 | (1.31, | (0.79, | (-2.02,     | <0.001 |
|                              |   |   |   |   | 1140.82)       | 1345.56)       | 0.66)       |        | (106.34,      | 150.39)        | -0.99)  |        | (1.31, | (0.79, | (-2.02,     | <0.001 |
|                              |   |   |   |   | 471.73         | 501.47         |             |        |               |                | -0.52   |        | 0.73   | 0.51   | -1.01       |        |
| Central Latin America        | — | — | — | — | (269.88,       | (283.12,       | 0.23 (0.20, | <0.001 | 70.15 (56.57, | 58.56 (41.98,  | (-0.67, | <0.001 | (0.67, | (0.38, | (-1.32,     | <0.001 |
|                              |   |   |   |   | 737.00)        | 785.77)        | 0.26)       |        | 88.66)        | 80.07)         | -0.36)  |        | 0.80)  | 0.67)  | -0.70)      |        |
|                              |   |   |   |   | 470.12         | 496.85         |             |        |               |                | -0.29   |        | 0.91   | 0.77   | -0.56       |        |
| Tropical Latin America       | — | — | — | — | (244.08,       | (261.84,       | 0.19 (0.18, | <0.001 | 81.05 (66.73, | 73.97 (57.88,  | (-0.50, | 0.006  | (0.82, | (0.66, | (-0.89,     | 0.001  |
|                              |   |   |   |   | 788.60)        | 824.54)        | 0.20)       |        | 100.97)       | 95.25)         | -0.08)  |        | 1.02)  | 0.91)  | -0.22)      |        |
|                              |   |   |   |   | 517.22         | 587.58         |             |        |               |                | -0.50   |        | 0.84   | 0.61   | -1.19       |        |
| Central Sub-Saharan Africa   | — | — | — | — | (217.30,       | (238.59,       | 0.47 (0.37, | <0.001 | 79.06 (48.54, | 68.47 (41.47,  | (-0.60, | <0.001 | (0.49, | (0.36, | (-1.34,     | <0.001 |
|                              |   |   |   |   | 993.75)        | 1186.10)       | 0.57)       |        | 120.54)       | 108.33)        | -0.41)  |        | 1.35)  | 0.98)  | -1.04)      |        |
|                              |   |   |   |   | 740.63         | 698.21         |             |        |               |                | -0.65   |        | 0.52   | 0.36   | -1.35       |        |
| Western Europe               | — | — | — | — | (441.70,       | (419.15,       | (-0.26,     | <0.001 | 71.82 (52.29, | 59.59 (40.27,  | (-0.77, | <0.001 | (0.47, | (0.31, | (-1.90,     | <0.001 |
|                              |   |   |   |   | 1132.31)       | 1042.64)       | -0.16)      |        | 101.36)       | 86.69)         | -0.52)  |        | 0.66)  | 0.49)  | -0.80)      |        |
|                              |   |   |   |   | 899.91         | 646.73         |             |        |               |                | -0.29   |        | 0.67   | 0.76   |             |        |
| High-income North America    | — | — | — | — | (501.16,       | (393.35,       | (-1.18,     | <0.001 | 89.25 (64.51, | 81.19 (63.17,  | (-0.60, | 0.073  | (0.59, | (0.66, | 0.51 (0.02, | 0.042  |
|                              |   |   |   |   | 1474.90)       | 1004.38)       | -1.01)      |        | 125.29)       | 106.77)        | 0.03)   |        | 0.79)  | 0.97)  | 1.01)       |        |
|                              |   |   |   |   | 139.27 (78.85, | 135.09 (76.55, | -0.10       |        |               |                | -1.02   |        | 0.77   | 0.54   | -1.20       |        |
| Central Asia                 | — | — | — | — | 209.60)        | 206.92)        | (-0.14,     | <0.001 | 55.01 (42.04, | 40.84 (30.43,  | (-1.56, | <0.001 | (0.56, | (0.39, | (-1.84,     | <0.001 |
|                              |   |   |   |   |                |                | -0.05)      |        | 65.84)        | 63.50)         | -0.48)  |        | 0.91)  | 0.90)  | -0.56)      |        |

|                                |   |   |   |   |                               |                               |                            |        |                          |                           |                            |        |                         |                         |                            |        |
|--------------------------------|---|---|---|---|-------------------------------|-------------------------------|----------------------------|--------|--------------------------|---------------------------|----------------------------|--------|-------------------------|-------------------------|----------------------------|--------|
| Eastern Europe                 | — | — | — | — | 127.04 (70.87,<br>203.24)     | 128.59 (71.91,<br>208.23)     | 0.05 (0.01,<br>0.10)       | 0.021  | 30.29 (24.47,<br>36.95)  | 41.04 (28.98,<br>70.50)   | 1.09<br>(0.43,<br>1.75)    | 0.001  | 0.38<br>(0.30,<br>0.44) | 0.55<br>(0.38,<br>1.05) | 1.35 (0.55,<br>2.15)       | 0.001  |
| Southern<br>Sub-Saharan Africa | — | — | — | — | 337.80<br>(149.14,<br>637.39) | 362.42<br>(162.15,<br>699.26) | 0.24 (0.22,<br>0.26)       | <0.001 | 82.69 (61.43,<br>106.67) | 63.10 (39.06,<br>93.61)   | -0.93<br>(-2.06,<br>0.22)  | 0.112  | 1.05<br>(0.77,<br>1.33) | 0.71<br>(0.40,<br>1.09) | -1.22<br>(-3.16,<br>0.76)  | 0.226  |
| High-income Asia<br>Pacific    | — | — | — | — | 398.72<br>(235.05,<br>630.99) | 395.05<br>(239.79,<br>618.48) | -0.03<br>(-0.06,<br>-0.00) | 0.025  | 46.93 (34.75,<br>63.60)  | 31.76 (20.61,<br>47.74)   | -1.35<br>(-1.52,<br>-1.18) | <0.001 | 0.41<br>(0.34,<br>0.53) | 0.17<br>(0.13,<br>0.29) | -3.06<br>(-3.44,<br>-2.68) | <0.001 |
| Central Europe                 | — | — | — | — | 628.75<br>(388.82,<br>938.05) | 638.29<br>(396.69,<br>947.55) | 0.06 (-0.06,<br>0.17)      | 0.346  | 73.96 (57.73,<br>97.64)  | 52.89 (36.02,<br>75.05)   | -1.21<br>(-1.29,<br>-1.12) | <0.001 | 0.65<br>(0.60,<br>0.71) | 0.30<br>(0.23,<br>0.39) | -2.63<br>(-2.93,<br>-2.34) | <0.001 |
| Andean Latin<br>America        | — | — | — | — | 475.67<br>(242.78,<br>764.98) | 544.11<br>(296.41,<br>851.54) | 0.46 (0.44,<br>0.49)       | <0.001 | 95.72 (72.18,<br>122.07) | 62.72 (42.95,<br>86.88)   | -1.50<br>(-1.80,<br>-1.19) | <0.001 | 1.14<br>(0.87,<br>1.47) | 0.54<br>(0.37,<br>0.79) | -2.55<br>(-3.46,<br>-1.63) | <0.001 |
| Caribbean                      | — | — | — | — | 272.39<br>(146.72,<br>424.74) | 292.94<br>(158.95,<br>473.93) | 0.25 (0.21,<br>0.28)       | <0.001 | 89.00 (65.32,<br>117.34) | 104.49 (67.66,<br>149.89) | 0.62<br>(0.34,<br>0.91)    | <0.001 | 1.21<br>(0.83,<br>1.64) | 1.44<br>(0.88,<br>2.18) | 0.70 (0.35,<br>1.05)       | <0.001 |
| Southern Latin<br>America      | — | — | — | — | 521.44<br>(288.66,<br>830.33) | 572.05<br>(316.57,<br>880.50) | 0.33 (0.30,<br>0.35)       | <0.001 | 91.33 (73.51,<br>115.52) | 65.13 (45.97,<br>90.51)   | -1.18<br>(-1.69,<br>-0.68) | <0.001 | 1.03<br>(0.86,<br>1.24) | 0.56<br>(0.41,<br>0.76) | -2.14<br>(-2.86,<br>-1.43) | <0.001 |
| Oceania                        | — | — | — | — | 194.86 (98.20,<br>327.56)     | 167.08 (84.60,<br>279.34)     | -0.54<br>(-0.61,<br>-0.47) | <0.001 | 92.19 (60.73,<br>139.15) | 83.58 (50.17,<br>134.33)  | -0.36<br>(-0.59,<br>-0.12) | 0.003  | 1.33<br>(0.81,<br>2.07) | 1.21<br>(0.67,<br>2.06) | -0.28<br>(-0.70,<br>0.14)  | 0.188  |
| Australasia                    | — | — | — | — | 346.25<br>(196.78,<br>542.11) | 325.05<br>(180.97,<br>503.67) | -0.22<br>(-0.26,<br>-0.19) | <0.001 | 42.21 (30.24,<br>59.63)  | 39.72 (27.67,<br>56.29)   | -0.19<br>(-0.86,<br>0.48)  | 0.579  | 0.38<br>(0.31,<br>0.50) | 0.36<br>(0.26,<br>0.50) | -0.13<br>(-1.15,<br>0.91)  | 0.808  |
| <b>Men</b>                     |   |   |   |   |                               |                               |                            |        |                          |                           |                            |        |                         |                         |                            |        |
| Global                         | — | — | — | — | 199.21<br>(102.10,<br>334.94) | 249.94<br>(124.54,<br>434.05) | 0.78 (0.72,<br>0.84)       | <0.001 | 49.39 (40.53,<br>62.29)  | 51.29 (40.70,<br>65.31)   | 0.12<br>(-0.10,<br>0.34)   | 0.283  | 0.63<br>(0.54,<br>0.79) | 0.61<br>(0.52,<br>0.73) | -0.05<br>(-0.30,<br>0.20)  | 0.709  |
| SDI category                   |   |   |   |   |                               |                               |                            |        |                          |                           |                            |        |                         |                         |                            |        |
| High                           | — | — | — | — | 262.41                        | 233.68                        | -0.38                      | <0.001 | 41.98 (34.11,            | 35.92 (28.58,             | -0.54                      | <0.001 | 0.45                    | 0.38                    | -0.60                      | <0.001 |

|                              |   |   |   |   |                        |                         |                   |        |                       |                       |                |        |              |              |                    |        |
|------------------------------|---|---|---|---|------------------------|-------------------------|-------------------|--------|-----------------------|-----------------------|----------------|--------|--------------|--------------|--------------------|--------|
|                              |   |   |   |   | (146.23, 412.59)       | (136.23, 359.05)        | (-0.45, -0.32)    |        | 52.68)                | 44.82)                | (-0.72, -0.35) |        | (0.41, 0.51) | (0.33, 0.45) | (-0.83, -0.38)     |        |
|                              |   |   |   |   |                        | 205.33                  |                   |        |                       |                       | -0.63          |        | 0.59         | 0.44         | -1.01              |        |
| High-middle                  | — | — | — | — | 164.06 (89.28, 256.65) | (112.58, 322.70)        | 0.77 (0.69, 0.84) | <0.001 | 45.39 (38.42, 53.98)  | 38.11 (30.48, 50.09)  | (-1.07, -0.20) | 0.004  | (0.51, 0.69) | (0.37, 0.60) | (-1.63, -0.38)     | 0.002  |
|                              |   |   |   |   |                        | 241.80                  |                   |        |                       |                       | 0.09           |        | 0.54         | 0.51         | -0.24              |        |
| Middle                       | — | — | — | — | 179.39 (90.12, 304.08) | (123.10, 415.43)        | 1.03 (0.95, 1.12) | <0.001 | 43.33 (34.89, 56.74)  | 44.61 (35.19, 58.06)  | (-0.01, 0.20)  | 0.084  | (0.46, 0.70) | (0.43, 0.62) | (-0.40, -0.08)     | 0.004  |
|                              |   |   |   |   |                        | 217.14                  |                   |        |                       |                       | 0.23           |        | 0.72         | 0.73         | 0.07 (-0.24, 0.38) |        |
| Low-middle                   | — | — | — | — | 166.57 (79.55, 291.10) | (103.74, 386.17)        | 0.92 (0.88, 0.96) | <0.001 | 53.55 (41.73, 73.82)  | 56.57 (43.98, 74.23)  | (-0.01, 0.48)  | 0.057  | (0.57, 1.05) | (0.58, 0.93) |                    | 0.641  |
|                              |   |   |   |   |                        | 336.38                  |                   |        |                       |                       | -0.02          |        | 1.15         | 1.08         | -0.22              |        |
| Low                          | — | — | — | — | (137.64, 651.43)       | (166.68, 771.13)        | 0.60 (0.58, 0.63) | <0.001 | 89.12 (69.56, 120.12) | 88.20 (66.20, 120.13) | (-0.11, 0.07)  | 0.663  | (0.93, 1.58) | (0.83, 1.48) | (-0.40, -0.05)     | 0.014  |
| <b>21 GBD region</b>         |   |   |   |   |                        |                         |                   |        |                       |                       |                |        |              |              |                    |        |
|                              |   |   |   |   |                        |                         | -0.32             |        |                       |                       | -0.10          |        | 0.62         | 0.60         | -0.07              |        |
| South Asia                   | — | — | — | — | 97.36 (47.23, 170.69)  | 89.35 (43.62, 155.73)   | (-0.39, -0.25)    | <0.001 | 43.49 (30.24, 70.01)  | 42.03 (31.37, 58.06)  | (-0.60, 0.41)  | 0.713  | (0.42, 1.02) | (0.44, 0.86) | (-0.62, 0.49)      | 0.808  |
|                              |   |   |   |   |                        |                         |                   |        |                       |                       | -0.64          |        | 0.27         | 0.18         | -1.46              |        |
| East Asia                    | — | — | — | — | 78.50 (39.69, 133.59)  | 119.55 (62.52, 203.17)  | 1.48 (1.42, 1.53) | <0.001 | 21.15 (15.36, 28.44)  | 17.55 (12.99, 23.75)  | (-0.95, -0.33) | <0.001 | (0.19, 0.37) | (0.14, 0.24) | (-1.63, -1.29)     | <0.001 |
|                              |   |   |   |   |                        |                         |                   |        |                       |                       | -0.44          |        | 1.13         | 0.90         | -0.73              |        |
| North Africa and Middle East | — | — | — | — | (259.35, 850.89)       | (278.09, 882.78)        | 0.19 (0.12, 0.26) | <0.001 | 97.30 (72.78, 135.07) | 85.04 (60.84, 118.93) | (-0.67, -0.21) | <0.001 | (0.86, 1.58) | (0.65, 1.25) | (-0.92, -0.55)     | <0.001 |
|                              |   |   |   |   |                        |                         |                   |        |                       |                       | -0.27          |        | 2.01         | 1.67         | -0.62              |        |
| Western Sub-Saharan Africa   | — | — | — | — | (384.79, 1793.79)      | (444.72, 2061.24)       | 0.47 (0.44, 0.51) | <0.001 | (123.16, 236.84)      | (112.98, 225.08)      | (-0.39, -0.15) | <0.001 | (1.44, 2.79) | (1.24, 2.31) | (-0.73, -0.52)     | <0.001 |
|                              |   |   |   |   |                        |                         |                   |        |                       |                       | -0.39          |        | 0.68         | 0.57         | -0.61              |        |
| Southeast Asia               | — | — | — | — | 179.44 (96.28, 283.01) | 200.51 (107.45, 313.99) | 0.39 (0.37, 0.40) | <0.001 | 51.57 (41.32, 64.35)  | 46.10 (36.56, 57.66)  | (-0.64, -0.14) | 0.002  | (0.54, 0.85) | (0.46, 0.70) | (-1.01, -0.21)     | 0.003  |
|                              |   |   |   |   |                        |                         |                   |        |                       |                       | -0.42          |        | 1.26         | 1.03         | -0.68              |        |
| Eastern Sub-Saharan Africa   | — | — | — | — | (145.52, 708.04)       | (170.73, 829.67)        | 0.51 (0.48, 0.54) | <0.001 | 96.73 (73.34, 135.96) | 86.18 (61.36, 124.01) | (-0.60, -0.24) | <0.001 | (0.96, 1.80) | (0.74, 1.58) | (-0.83, -0.52)     | <0.001 |

|                             |   |   |   |   |                            |                            |                         |        |                           |                       |                         |        |                      |                      |                         |        |
|-----------------------------|---|---|---|---|----------------------------|----------------------------|-------------------------|--------|---------------------------|-----------------------|-------------------------|--------|----------------------|----------------------|-------------------------|--------|
| Central Latin America       | — | — | — | — | 218.99<br>(115.62, 360.64) | 246.42<br>(131.35, 401.78) | 0.40 (0.38, 0.42)       | <0.001 | 49.16 (41.46, 59.39)      | 39.97 (30.69, 51.29)  | -0.64<br>(-0.86, -0.42) | <0.001 | 0.60<br>(0.54, 0.68) | 0.43<br>(0.34, 0.52) | -1.00<br>(-1.35, -0.66) | <0.001 |
| Tropical Latin America      | — | — | — | — | 167.62 (83.33, 291.92)     | 182.13 (91.30, 315.26)     | 0.29 (0.28, 0.30)       | <0.001 | 54.44 (47.15, 63.81)      | 49.23 (41.83, 58.84)  | -0.34<br>(-0.64, -0.05) | 0.023  | 0.74<br>(0.66, 0.83) | 0.64<br>(0.56, 0.74) | -0.48<br>(-0.82, -0.14) | 0.005  |
| Central Sub-Saharan Africa  | — | — | — | — | 325.32<br>(124.92, 652.82) | 360.46<br>(136.49, 755.57) | 0.36 (0.32, 0.41)       | <0.001 | 72.42 (44.25, 109.13)     | 66.13 (42.15, 104.21) | -0.35<br>(-0.51, -0.18) | <0.001 | 0.89<br>(0.52, 1.40) | 0.76<br>(0.45, 1.30) | -0.62<br>(-0.84, -0.39) | <0.001 |
| Western Europe              | — | — | — | — | 261.14<br>(146.40, 409.52) | 254.60<br>(145.09, 397.68) | -0.09<br>(-0.13, -0.06) | <0.001 | 44.22 (35.81, 55.40)      | 33.12 (25.29, 43.62)  | -1.01<br>(-1.29, -0.73) | <0.001 | 0.49<br>(0.44, 0.56) | 0.31<br>(0.27, 0.39) | -1.56<br>(-1.95, -1.17) | <0.001 |
| High-income North America   | — | — | — | — | 298.11<br>(158.16, 510.38) | 214.76<br>(121.94, 339.62) | -1.10<br>(-1.17, -1.03) | <0.001 | 44.58 (35.47, 57.48)      | 43.38 (34.99, 52.87)  | -0.09<br>(-0.45, 0.27)  | 0.613  | 0.46<br>(0.42, 0.52) | 0.51<br>(0.42, 0.61) | 0.37 (-0.17, 0.92)      | 0.179  |
| Central Asia                | — | — | — | — | 114.72 (58.72, 184.66)     | 122.99 (64.86, 200.80)     | 0.24 (0.22, 0.25)       | <0.001 | 70.28 (56.59, 83.33)      | 54.05 (42.78, 72.43)  | -0.86<br>(-1.53, -0.19) | 0.012  | 1.04<br>(0.84, 1.23) | 0.77<br>(0.60, 1.07) | -1.00<br>(-1.74, -0.25) | 0.009  |
| Eastern Europe              | — | — | — | — | 69.08 (35.71, 116.85)      | 74.04 (37.90, 124.89)      | 0.24 (0.22, 0.26)       | <0.001 | 41.47 (35.57, 49.79)      | 67.92 (52.49, 112.82) | 1.80<br>(0.23, 3.39)    | 0.024  | 0.61<br>(0.52, 0.74) | 1.04<br>(0.79, 1.77) | 1.93 (0.24, 3.65)       | 0.025  |
| Southern Sub-Saharan Africa | — | — | — | — | 277.53<br>(121.08, 541.01) | 285.95<br>(123.28, 560.54) | 0.10 (0.07, 0.14)       | <0.001 | 65.11 (48.13, 86.45)      | 65.88 (47.18, 94.52)  | 0.00<br>(-0.29, 0.29)   | 0.993  | 0.81<br>(0.62, 1.07) | 0.82<br>(0.57, 1.22) | -0.03<br>(-0.41, 0.35)  | 0.868  |
| High-income Asia Pacific    | — | — | — | — | 227.48<br>(125.40, 364.82) | 226.36<br>(128.40, 356.81) | -0.03<br>(-0.10, 0.04)  | 0.424  | 37.57 (28.41, 49.54)      | 24.11 (17.25, 33.68)  | -1.50<br>(-1.76, -1.24) | <0.001 | 0.41<br>(0.32, 0.51) | 0.19<br>(0.16, 0.24) | -2.59<br>(-2.94, -2.24) | <0.001 |
| Central Europe              | — | — | — | — | 316.35<br>(179.78, 489.95) | 328.73<br>(187.97, 509.66) | 0.12 (0.02, 0.22)       | 0.020  | 75.33 (64.97, 89.38)      | 45.26 (34.44, 58.67)  | -1.78<br>(-2.08, -1.48) | <0.001 | 0.94<br>(0.86, 1.04) | 0.44<br>(0.36, 0.55) | -2.60<br>(-2.91, -2.28) | <0.001 |
| Andean Latin America        | — | — | — | — | 332.66<br>(162.20, 560.35) | 391.76<br>(195.11, 643.13) | 0.57 (0.56, 0.58)       | <0.001 | 103.72<br>(72.80, 139.06) | 64.21 (44.28, 90.06)  | -1.60<br>(-1.95, -1.25) | <0.001 | 1.39<br>(0.95, 1.89) | 0.70<br>(0.46, 1.04) | -2.34<br>(-2.83, -1.85) | <0.001 |

| Caribbean                 | — | — | — | — | 199.62 (98.44,<br>329.62)      | 242.56<br>(115.67,<br>402.23) | 0.68 (0.64,<br>0.73)       | <0.001 | 61.80 (48.08,<br>76.87)      | 70.68 (50.08,<br>96.19)  | 0.49<br>(0.30,<br>0.69)    | <0.001 | 0.83<br>(0.65,<br>1.05) | 0.93<br>(0.64,<br>1.33) | 0.46 (0.18,<br>0.74)       | 0.001  |
|---------------------------|---|---|---|---|--------------------------------|-------------------------------|----------------------------|--------|------------------------------|--------------------------|----------------------------|--------|-------------------------|-------------------------|----------------------------|--------|
| Southern Latin<br>America | — | — | — | — | 225.24<br>(118.13,<br>369.80)  | 255.42<br>(136.97,<br>413.29) | 0.43 (0.38,<br>0.49)       | <0.001 | 53.69 (41.95,<br>68.42)      | 43.24 (32.18,<br>57.36)  | -0.76<br>(-1.15,<br>-0.36) | <0.001 | 0.67<br>(0.54,<br>0.84) | 0.48<br>(0.37,<br>0.61) | -1.24<br>(-1.79,<br>-0.70) | <0.001 |
| Oceania                   | — | — | — | — | 110.32 (53.16,<br>189.33)      | 103.54 (50.09,<br>181.68)     | -0.21<br>(-0.24,<br>-0.19) | <0.001 | 73.92 (49.63,<br>109.28)     | 68.60 (42.27,<br>101.26) | -0.28<br>(-0.40,<br>-0.17) | <0.001 | 1.10<br>(0.71,<br>1.64) | 1.02<br>(0.61,<br>1.56) | -0.29<br>(-0.41,<br>-0.16) | <0.001 |
| Australasia               | — | — | — | — | 160.72 (83.55,<br>260.64)      | 151.07 (80.97,<br>241.62)     | -0.21<br>(-0.23,<br>-0.19) | <0.001 | 25.87 (18.91,<br>36.09)      | 24.43 (16.71,<br>34.56)  | -0.25<br>(-0.67,<br>0.18)  | 0.252  | 0.28<br>(0.21,<br>0.37) | 0.26<br>(0.19,<br>0.38) | -0.25<br>(-0.83,<br>0.33)  | 0.391  |
| <b>30-34 years</b>        |   |   |   |   |                                |                               |                            |        |                              |                          |                            |        |                         |                         |                            |        |
| <b>Women</b>              |   |   |   |   |                                |                               |                            |        |                              |                          |                            |        |                         |                         |                            |        |
| Global                    | — | — | — | — | 291.11<br>(150.89,<br>503.79)  | 302.64<br>(151.23,<br>541.45) | 0.13 (0.06,<br>0.20)       | <0.001 | 66.43 (55.18,<br>80.80)      | 58.28 (47.58,<br>74.20)  | -0.47<br>(-0.68,<br>-0.26) | <0.001 | 0.90<br>(0.76,<br>1.01) | 0.74<br>(0.64,<br>0.85) | -0.68<br>(-0.97,<br>-0.39) | <0.001 |
| <b>SDI category</b>       |   |   |   |   |                                |                               |                            |        |                              |                          |                            |        |                         |                         |                            |        |
| High                      | — | — | — | — | 621.83<br>(353.89,<br>1040.60) | 532.08<br>(315.33,<br>859.61) | -0.52<br>(-0.56,<br>-0.48) | <0.001 | 75.30 (58.05,<br>101.61)     | 69.21 (53.60,<br>91.07)  | -0.24<br>(-0.55,<br>0.06)  | 0.121  | 0.75<br>(0.69,<br>0.87) | 0.72<br>(0.62,<br>0.91) | -0.08<br>(-0.60,<br>0.45)  | 0.775  |
| High-middle               | — | — | — | — | 216.63<br>(115.61,<br>363.31)  | 244.95<br>(134.28,<br>413.40) | 0.41 (0.35,<br>0.47)       | <0.001 | 47.48 (40.53,<br>57.44)      | 40.19 (31.51,<br>52.80)  | -0.53<br>(-0.82,<br>-0.25) | <0.001 | 0.63<br>(0.58,<br>0.70) | 0.48<br>(0.40,<br>0.67) | -0.97<br>(-1.33,<br>-0.62) | <0.001 |
| Middle                    | — | — | — | — | 197.44 (97.57,<br>352.32)      | 241.39<br>(120.63,<br>433.98) | 0.71 (0.56,<br>0.85)       | <0.001 | 53.26 (44.28,<br>63.56)      | 44.13 (35.24,<br>57.15)  | -0.72<br>(-1.07,<br>-0.37) | <0.001 | 0.75<br>(0.63,<br>0.84) | 0.55<br>(0.46,<br>0.64) | -1.10<br>(-1.55,<br>-0.65) | <0.001 |
| Low-middle                | — | — | — | — | 211.92<br>(100.99,<br>384.58)  | 261.39<br>(125.40,<br>484.08) | 0.73 (0.67,<br>0.80)       | <0.001 | 79.99 (61.28,<br>101.17)     | 70.51 (56.71,<br>86.99)  | -0.43<br>(-0.65,<br>-0.21) | <0.001 | 1.21<br>(0.89,<br>1.54) | 1.00<br>(0.79,<br>1.22) | -0.66<br>(-0.95,<br>-0.38) | <0.001 |
| Low                       | — | — | — | — | 356.70<br>(150.02,<br>775.40)  | 422.51<br>(173.28,<br>932.88) | 0.59 (0.56,<br>0.62)       | <0.001 | 121.58<br>(92.34,<br>152.61) | 93.13 (72.10,<br>123.64) | -0.92<br>(-1.05,<br>-0.79) | <0.001 | 1.81<br>(1.36,<br>2.25) | 1.25<br>(1.00,<br>1.54) | -1.29<br>(-1.46,<br>-1.12) | <0.001 |
| 344                       |   |   |   |   |                                |                               |                            |        |                              |                          |                            |        |                         |                         |                            |        |



| 21 GBD region                |    |    |    |    |                |                |             |        |               |                |         |        |        |        |             |        |
|------------------------------|----|----|----|----|----------------|----------------|-------------|--------|---------------|----------------|---------|--------|--------|--------|-------------|--------|
| Region                       | Y1 | Y2 | Y3 | Y4 | Y1             | Y2             | Y3          | Y4     | Y1            | Y2             | Y3      | Y4     | Y1     | Y2     | Y3          |        |
| South Asia                   | —  | —  | —  | —  | 181.64 (88.66, | 170.74 (83.31, | -0.22       | <0.001 | 76.37 (56.64, | 64.19 (47.98,  | -0.61   | 0.002  | 1.18   | 0.97   | -0.65       |        |
|                              |    |    |    |    | 328.00)        | 308.03)        | (-0.28,     |        | 99.26)        | 81.64)         | (-1.00, |        | (0.83, | (0.71, | (-1.18,     | 0.019  |
| East Asia                    | —  | —  | —  | —  | 64.54 (32.43,  | 96.29 (47.11,  | 1.40 (1.16, | <0.001 | 20.83 (15.32, | 14.59 (10.64,  | -1.39   | 0.010  | 0.30   | 0.16   | -2.02       |        |
|                              |    |    |    |    | 118.59)        | 178.66)        | 1.63)       |        | 27.12)        | 20.76)         | (-2.42, |        | (0.21, | (0.12, | (-2.90,     | <0.001 |
| North Africa and Middle East | —  | —  | —  | —  | 537.95         | 524.84         | -0.08       | <0.001 | 98.35 (76.80, | 84.72 (63.75,  | -0.51   | <0.001 | 1.23   | 1.00   | -0.69       |        |
|                              |    |    |    |    | (285.43,       | (281.20,       | (-0.12,     |        | 124.20)       | 110.86)        | (-0.60, |        | (0.93, | (0.75, | (-0.88,     | <0.001 |
| Western Sub-Saharan Africa   | —  | —  | —  | —  | 895.80)        | 881.03)        | -0.05)      | <0.001 | 197.86        | 130.94 (90.40, | -1.42   | <0.001 | 2.81   | 1.49   | -2.17       |        |
|                              |    |    |    |    | (292.39,       | (347.02,       | 0.63 (0.59, |        | (144.62,      | 194.68)        | (-1.49, |        | (2.05, | (1.11, | (-2.29,     | <0.001 |
| Southeast Asia               | —  | —  | —  | —  | 1657.30)       | 1983.20)       | 0.67)       | <0.001 | 272.50)       | 208.57         | -1.36)  | <0.001 | 3.69)  | 2.00)  | -2.04)      |        |
|                              |    |    |    |    | 208.57         | 214.29         | 0.10 (0.06, |        | 65.18 (51.18, | 46.89 (36.22,  | -1.12   |        | (0.72, | (0.48, | (-1.61,     | <0.001 |
| Eastern Sub-Saharan Africa   | —  | —  | —  | —  | (112.78,       | (113.32,       | 0.13)       | <0.001 | 79.78)        | 339.46)        | -1.01)  | <0.001 | 1.17)  | 0.78)  | -1.27)      |        |
|                              |    |    |    |    | 422.98         | 510.16         | 0.66 (0.63, |        | 125.39        | 89.35 (63.03,  | -1.16   |        | 1.82   | 1.10   | -1.73       | <0.001 |
| Central Latin America        | —  | —  | —  | —  | (167.38,       | (203.10,       | 0.68)       | <0.001 | (91.06,       | 964.18)        | -1.06)  | <0.001 | (1.32, | (0.80, | (-1.85,     | <0.001 |
|                              |    |    |    |    | 964.18)        | 1159.57)       | 0.94)       |        | 171.60)       | 132.99)        | (-1.26, |        | 2.51)  | 1.56)  | -1.62)      |        |
| Tropical Latin America       | —  | —  | —  | —  | 294.23         | 380.43         | 0.89 (0.84, | <0.001 | 63.48 (52.39, | 53.66 (39.50,  | -0.48   | 0.069  | 0.84   | 0.59   | -1.07       |        |
|                              |    |    |    |    | (126.56,       | (202.27,       | 0.94)       |        | 78.42)        | 72.51)         | (-1.00, |        | (0.77, | (0.43, | (-1.79,     | 0.004  |
| Central Sub-Saharan Africa   | —  | —  | —  | —  | 521.69)        | 635.70)        | 0.94)       | <0.001 | 501.51)       | 258.60         | 0.04)   | 0.734  | 0.94)  | 0.79)  | -0.34)      |        |
|                              |    |    |    |    | 258.60         | 312.21         | 0.65 (0.63, |        | 73.53 (63.04, | 72.34 (58.89,  | 0.04    |        | 1.06   | 0.98   | -0.15       |        |
| Western Europe               | —  | —  | —  | —  | (109.75,       | (149.10,       | 0.66)       | <0.001 | 88.86)        | 501.51)        | -0.20,  | 0.734  | (0.97, | (0.85, | (-0.45,     | 0.318  |
|                              |    |    |    |    | 501.51)        | 580.33)        | 0.28)       |        | 1.17)         | 1.16)          | 0.15)   |        |        |        |             |        |
| High-income North America    | —  | —  | —  | —  | 407.73         | 466.37         | 0.49 (0.35, | <0.001 | 85.31 (54.53, | 75.62 (46.50,  | -0.42   | <0.001 | 1.13   | 0.90   | -0.84       |        |
|                              |    |    |    |    | (156.86,       | (174.18,       | 0.62)       |        | 125.97)       | 116.92)        | (-0.52, |        | (0.70, | (0.55, | (-0.94,     | <0.001 |
| High-income North America    | —  | —  | —  | —  | 948.30)        | 1070.54)       | -0.32)      | <0.001 | 596.09        | 561.46         | -0.68)  | 0.067  | 0.71   | 0.51   | -1.10       |        |
|                              |    |    |    |    | (325.75,       | (311.71,       | (-0.31,     |        | 71.59 (54.57, | 58.80 (42.58,  | -0.79,  |        | (0.64, | (0.45, | (-1.40,     | <0.001 |
| High-income North America    | —  | —  | —  | —  | 955.78)        | 892.96)        | -0.14)      | <0.001 | 97.44)        | 81.51)         | -0.56)  | 0.067  | 0.87)  | 0.68)  | -0.81)      |        |
|                              |    |    |    |    | 805.54         | 640.65         | -0.75       |        | 92.25 (67.92, | 99.18 (79.32,  | 0.34    |        | 0.87   | 1.15   | 1.04 (0.49, | <0.001 |
| High-income North America    | —  | —  | —  | —  | (421.77,       | (351.47,       | (-0.81,     | <0.001 | 130.57)       | 129.78)        | (-0.02, | 0.067  | (0.78, | (0.99, | 1.58)       | <0.001 |

|                                |   |   |   |   |                               |                               |                            |        |                          |                           |         |        |        |        |              |        |
|--------------------------------|---|---|---|---|-------------------------------|-------------------------------|----------------------------|--------|--------------------------|---------------------------|---------|--------|--------|--------|--------------|--------|
|                                |   |   |   |   | 1429.20)                      | 1105.75)                      | -0.69)                     |        |                          |                           | 0.70)   | 1.03)  | 1.46)  |        |              |        |
|                                |   |   |   |   |                               |                               | -0.17)                     |        |                          |                           | -0.64)  | 0.93)  | 0.79)  | -0.69) |              |        |
| Central Asia                   | — | — | — | — | 112.00 (59.70,                | 106.28 (54.76,                | (-0.20,                    | <0.001 | 59.00 (46.82,            | 50.33 (39.10,             | (-0.92, | <0.001 | (0.73, | (0.60, | (-1.00,      | <0.001 |
|                                |   |   |   |   | 185.04)                       | 176.84)                       | -0.14)                     |        | 70.12)                   | 73.89)                    | -0.35)  |        | 1.11)  | 1.23)  | -0.38)       |        |
|                                |   |   |   |   |                               |                               |                            |        |                          |                           | 1.76)   |        | 0.55)  | 0.88)  | 1.96 (1.02,  | <0.001 |
| Eastern Europe                 | — | — | — | — | 79.06 (39.65,                 | 79.91 (40.23,                 | 0.04 (0.01,                | 0.003  | 35.25 (29.15,            | 54.22 (39.11,             | (0.92,  | <0.001 | (0.45, | (0.62, | 2.90)        | <0.001 |
|                                |   |   |   |   | 142.37)                       | 143.37)                       | 0.07)                      |        | 42.44)                   | 92.04)                    | 2.61)   |        | 0.65)  | 1.55)  |              |        |
|                                |   |   |   |   |                               |                               |                            |        |                          |                           | -1.06)  |        | 1.36)  | 0.90)  | -1.32)       |        |
| Southern<br>Sub-Saharan Africa | — | — | — | — | 225.67 (91.63,                | 240.93 (97.61,                | 0.23 (0.21,                | <0.001 | 89.06 (65.17,            | 63.89 (39.05,             | (-2.58, | 0.174  | (0.95, | (0.53, | (-3.35,      | 0.210  |
|                                |   |   |   |   | 498.20)                       | 537.87)                       | 0.24)                      |        | 113.69)                  | 91.73)                    | 0.47)   |        | 1.70)  | 1.36)  | 0.75)        |        |
|                                |   |   |   |   |                               |                               |                            |        |                          |                           | -1.30)  |        | 0.46)  | 0.21)  | -2.64)       |        |
| High-income Asia<br>Pacific    | — | — | — | — | 342.07<br>(178.37,            | 341.63<br>(184.78,            | 0.01 (-0.05,<br>0.07)      | 0.751  | 44.40 (32.75,<br>62.22)  | 30.41 (20.05,<br>47.60)   | (-1.41, | <0.001 | (0.39, | (0.17, | (-2.88,      | <0.001 |
|                                |   |   |   |   | 606.13)                       | 590.53)                       |                            |        |                          |                           | -1.18)  |        | 0.60)  | 0.39)  | -2.40)       |        |
|                                |   |   |   |   |                               |                               |                            |        |                          |                           | -1.76)  |        | 1.11)  | 0.44)  | -3.03)       |        |
| Central Europe                 | — | — | — | — | 490.78<br>(266.17,            | 507.36<br>(281.57,            | 0.15 (-0.01,<br>0.30)      | 0.069  | 88.86 (75.01,<br>110.54) | 52.17 (36.91,<br>74.23)   | (-1.97, | <0.001 | (1.03, | (0.35, | (-3.39,      | <0.001 |
|                                |   |   |   |   | 813.11)                       | 848.42)                       |                            |        |                          |                           | -1.54)  |        | 1.19)  | 0.56)  | -2.67)       |        |
|                                |   |   |   |   |                               |                               |                            |        |                          |                           | -1.38)  |        | 1.12)  | 0.57)  | -2.38)       |        |
| Andean Latin<br>America        | — | — | — | — | 272.54<br>(108.30,            | 362.23<br>(179.31,            | 0.98 (0.91,<br>1.04)       | <0.001 | 78.20 (58.80,<br>99.19)  | 51.84 (35.71,<br>72.85)   | (-2.09, | <0.001 | (0.85, | (0.39, | (-3.53,      | <0.001 |
|                                |   |   |   |   | 482.79)                       | 613.99)                       |                            |        |                          |                           | -0.67)  |        | 1.45)  | 0.84)  | -1.22)       |        |
|                                |   |   |   |   |                               |                               |                            |        |                          |                           | 0.38)   |        | 1.51)  | 1.70)  | 0.40 (0.13,  | 0.003  |
| Caribbean                      | — | — | — | — | 251.93<br>(136.79,            | 262.91<br>(136.64,            | 0.15 (0.13,<br>0.17)       | <0.001 | 98.87 (73.88,<br>129.60) | 110.12 (73.38,<br>159.38) | (0.18,  | <0.001 | (1.08, | (1.06, | 0.66)        |        |
|                                |   |   |   |   | 407.23)                       | 434.37)                       |                            |        |                          |                           | 0.59)   |        | 2.02)  | 2.55)  |              |        |
|                                |   |   |   |   |                               |                               |                            |        |                          |                           | -0.48)  |        | 1.24)  | 0.82)  | -1.34)       |        |
| Southern Latin<br>America      | — | — | — | — | 298.16 (52.22,<br>621.60)     | 510.67<br>(260.52,<br>849.65) | 1.88 (1.81,<br>1.94)       | <0.001 | 86.03 (66.62,<br>108.46) | 73.51 (54.13,<br>96.87)   | (-0.79, | 0.003  | (1.02, | (0.63, | (-1.74,      | <0.001 |
|                                |   |   |   |   |                               |                               |                            |        |                          |                           | -0.16)  |        | 1.50)  | 1.05)  | -0.94)       |        |
|                                |   |   |   |   |                               |                               |                            |        |                          |                           | -0.41)  |        | 0.98)  | 0.89)  | -0.40)       |        |
| Oceania                        | — | — | — | — | 67.32 (34.07,<br>110.38)      | 56.46 (28.42,<br>93.67)       | (-0.66,<br>-0.57)          | <0.001 | 59.48 (38.07,<br>88.82)  | 53.45 (32.48,<br>84.91)   | (-0.51, | <0.001 | (0.61, | (0.51, | (-0.50,      | <0.001 |
|                                |   |   |   |   |                               |                               |                            |        |                          |                           | -0.31)  |        | 1.49)  | 1.44)  | -0.29)       |        |
|                                |   |   |   |   |                               |                               |                            |        |                          |                           | 0.28)   |        | 0.42)  | 0.48)  | 0.57 (-0.01, | 0.053  |
| Australasia                    | — | — | — | — | 307.00<br>(169.50,<br>483.67) | 294.07<br>(159.54,<br>465.50) | -0.16<br>(-0.21,<br>-0.11) | <0.001 | 40.43 (29.33,<br>55.24)  | 42.98 (30.03,<br>58.93)   | (-0.08, | 0.126  | (0.34, | (0.35, | 1.15)        |        |
|                                |   |   |   |   |                               |                               |                            |        |                          |                           | 0.63)   |        | 0.59)  | 0.67)  |              |        |
| <b>Men</b>                     |   |   |   |   |                               |                               |                            |        |                          |                           |         |        |        |        |              |        |
| Global                         | — | — | — | — | 117.23 (61.25,                | 138.48 (72.37,                | 0.56 (0.51,                | <0.001 | 55.81 (48.17,            | 52.23 (44.58,             | -0.26)  | <0.001 | 0.87)  | 0.79)  | -0.39)       | <0.001 |

|                      |   |   |   |   |                |                |             |        |               |                |         |        |        |         |         |        |
|----------------------|---|---|---|---|----------------|----------------|-------------|--------|---------------|----------------|---------|--------|--------|---------|---------|--------|
|                      |   |   |   |   | 208.97)        | 253.61)        | 0.61)       |        | 68.43)        | 63.09)         | (-0.36, | (0.77, | (0.69, | (-0.52, |         |        |
|                      |   |   |   |   |                |                |             |        |               |                | -0.17)  | 1.09)  | 0.91)  | -0.25)  |         |        |
| <b>SDI category</b>  |   |   |   |   |                |                |             |        |               |                |         |        |        |         |         |        |
|                      |   |   |   |   | 186.69         | 163.64         | -0.44       |        |               |                | -0.68   | 0.71   | 0.57   | -0.76   |         |        |
| High                 | — | — | — | — | (107.54,       | (100.02,       | (-0.49,     | <0.001 | 50.10 (44.06, | 41.20 (34.85,  | (-0.94, | <0.001 | (0.66, | (0.49,  | (-1.11, | <0.001 |
|                      |   |   |   |   | 300.58)        | 257.28)        | -0.40)      |        | 58.28)        | 48.81)         | -0.43)  |        | 0.77)  | 0.68)   | -0.40)  |        |
|                      |   |   |   |   | 91.00 (49.20,  | 115.04 (63.91, | 0.80 (0.74, | <0.001 | 53.37 (47.10, | 42.74 (36.58,  | -0.78   |        | 0.85   | 0.64    | -0.99   |        |
| High-middle          | — | — | — | — | 151.41)        | 189.12)        | 0.86)       |        | 60.99)        | 54.87)         | (-1.16, | <0.001 | (0.76, | (0.56,  | (-1.43, | <0.001 |
|                      |   |   |   |   |                |                |             |        |               |                | -0.40)  |        | 0.98)  | 0.84)   | -0.54)  |        |
|                      |   |   |   |   | 95.99 (47.91,  | 130.43 (66.20, | 1.07 (0.97, | <0.001 | 46.93 (39.27, | 42.44 (35.61,  | -0.37   |        | 0.74   | 0.62    | -0.60   |        |
| Middle               | — | — | — | — | 177.83)        | 239.84)        | 1.17)       |        | 59.73)        | 53.15)         | (-0.57, | <0.001 | (0.62, | (0.54,  | (-0.86, | <0.001 |
|                      |   |   |   |   |                |                |             |        |               |                | -0.18)  |        | 0.95)  | 0.74)   | -0.34)  |        |
|                      |   |   |   |   | 97.60 (48.05,  | 121.47 (59.67, | 0.74 (0.68, | <0.001 | 63.27 (50.38, | 64.19 (52.27,  | 0.04    |        | 1.02   | 1.02    | -0.03   |        |
| Low-middle           | — | — | — | — | 180.07)        | 229.66)        | 0.80)       |        | 90.18)        | 79.85)         | (-0.17, | 0.703  | (0.80, | (0.83,  | (-0.26, | 0.811  |
|                      |   |   |   |   |                |                |             |        |               |                | 0.26)   |        | 1.49)  | 1.27)   | 0.20)   |        |
|                      |   |   |   |   | 179.30 (74.39, | 209.10 (88.48, | 0.54 (0.52, | <0.001 | 94.18 (74.44, | 85.65 (65.72,  | -0.32   |        | 1.49   | 1.31    | -0.44   |        |
| Low                  | — | — | — | — | 388.47)        | 443.81)        | 0.56)       |        | 130.08)       | 118.19)        | (-0.40, | <0.001 | (1.19, | (1.02,  | (-0.53, | <0.001 |
|                      |   |   |   |   |                |                |             |        |               |                | -0.24)  |        | 2.11)  | 1.85)   | -0.34)  |        |
| <b>21 GBD region</b> |   |   |   |   |                |                |             |        |               |                |         |        |        |         |         |        |
|                      |   |   |   |   | 73.80 (36.43,  | 67.61 (33.56,  | -0.32       |        |               |                | -0.21   |        | 0.98   | 0.93    | -0.21   |        |
| South Asia           | — | — | — | — | 133.75)        | 123.35)        | (-0.35,     | <0.001 | 59.43 (41.71, | 56.31 (43.56,  | (-0.38, | 0.015  | (0.68, | (0.71,  | (-0.39, | 0.033  |
|                      |   |   |   |   |                |                | -0.28)      |        | 94.27)        | 75.10)         | -0.04)  |        | 1.59)  | 1.26)   | -0.02)  |        |
|                      |   |   |   |   | 47.96 (23.92,  | 71.78 (35.76,  | 1.39 (1.34, | <0.001 | 24.34 (18.02, | 18.03 (13.98,  | -1.05   |        | 0.38   | 0.25    | -1.49   |        |
| East Asia            | — | — | — | — | 86.56)         | 130.21)        | 1.44)       |        | 32.66)        | 23.55)         | (-1.30, | <0.001 | (0.28, | (0.20,  | (-1.77, | <0.001 |
|                      |   |   |   |   |                |                |             |        |               |                | -0.80)  |        | 0.53)  | 0.33)   | -1.21)  |        |
|                      |   |   |   |   | 316.78         | 311.23         | -0.07       |        |               |                | -0.86   |        | 1.34   | 0.98    | -1.08   |        |
| North Africa and     | — | — | — | — | (170.09,       | (168.11,       | (-0.12,     | 0.014  | 93.22 (72.39, | 72.29 (55.02,  | (-0.98, | <0.001 | (1.03, | (0.74,  | (-1.21, | <0.001 |
| Middle East          |   |   |   |   | 528.17)        | 531.22)        | -0.01)      |        | 122.55)       | 95.02)         | -0.74)  |        | 1.79)  | 1.29)   | -0.94)  |        |
|                      |   |   |   |   | 420.77         | 486.18         |             |        |               |                | -0.47   |        | 2.29   | 1.87    | -0.68   |        |
| Western              | — | — | — | — | (168.91,       | (193.28,       | 0.51 (0.46, | <0.001 | 152.29        | 132.48 (96.27, | (-0.56, | <0.001 | (1.65, | (1.38,  | (-0.82, | <0.001 |
| Sub-Saharan Africa   |   |   |   |   | 932.04)        | 1077.24)       | 0.55)       |        | (111.21,      | 187.13)        | (-0.38) |        | 3.31)  | 2.66)   | -0.54)  |        |
|                      |   |   |   |   | 100.89 (55.43, | 112.44 (61.80, | 0.37 (0.35, | <0.001 | 54.42 (44.23, | 44.63 (35.73,  | -0.67   |        | 0.86   | 0.68    | -0.81   |        |
| Southeast Asia       | — | — | — | — | 162.37)        | 183.58)        | 0.39)       |        | 68.17)        | 55.57)         | (-0.90, | <0.001 | (0.69, | (0.54,  | (-1.09, | <0.001 |



|                        |   |   |   |   |                         |                         |                      |        |                       |                       |                      |        |                   |                   |                      |        |
|------------------------|---|---|---|---|-------------------------|-------------------------|----------------------|--------|-----------------------|-----------------------|----------------------|--------|-------------------|-------------------|----------------------|--------|
|                        |   |   |   |   | 303.29)                 |                         |                      |        | 113.29)               |                       | -2.23)               |        | 1.80)             | 0.86)             | -2.62)               |        |
| Andean Latin America   | — | — | — | — | 78.80 (3.18, 175.23)    | 155.33 (71.05, 270.26)  | 2.35 (2.24, 2.46)    | <0.001 | 77.99 (55.93, 101.36) | 42.97 (30.57, 59.90)  | -2.02 (-2.32, -1.72) | <0.001 | 1.30 (0.92, 1.70) | 0.61 (0.40, 0.90) | -2.59 (-2.95, -2.22) | <0.001 |
| Caribbean              | — | — | — | — | 104.20 (55.31, 166.93)  | 125.82 (65.84, 206.21)  | 0.65 (0.61, 0.69)    | <0.001 | 72.15 (59.64, 88.81)  | 79.37 (57.24, 109.23) | 0.33 (0.10, 0.55)    | 0.004  | 1.17 (0.95, 1.47) | 1.28 (0.89, 1.80) | 0.33 (0.06, 0.60)    | 0.015  |
| Southern Latin America | — | — | — | — | 37.97 (1.49, 134.22)    | 168.69 (85.07, 275.36)  | 5.22 (5.07, 5.37)    | <0.001 | 61.67 (50.55, 74.41)  | 50.63 (39.79, 62.63)  | -0.66 (-1.13, -0.18) | 0.007  | 1.05 (0.87, 1.27) | 0.73 (0.58, 0.91) | -1.22 (-1.75, -0.68) | <0.001 |
| Oceania                | — | — | — | — | 50.08 (25.14, 84.01)    | 47.43 (24.27, 79.38)    | -0.19 (-0.21, -0.16) | <0.001 | 56.39 (37.24, 83.24)  | 50.94 (32.81, 74.34)  | -0.38 (-0.58, -0.18) | <0.001 | 0.95 (0.60, 1.42) | 0.85 (0.53, 1.27) | -0.39 (-0.58, -0.20) | <0.001 |
| Australasia            | — | — | — | — | 119.45 (68.11, 186.91)  | 115.31 (65.84, 177.21)  | -0.12 (-0.14, -0.11) | <0.001 | 27.69 (21.35, 36.30)  | 29.46 (21.43, 38.97)  | 0.21 (-0.48, 0.91)   | 0.552  | 0.37 (0.30, 0.51) | 0.41 (0.30, 0.55) | 0.31 (-0.58, 1.21)   | 0.497  |
| <b>35-39 years</b>     |   |   |   |   |                         |                         |                      |        |                       |                       |                      |        |                   |                   |                      |        |
| <b>Women</b>           |   |   |   |   |                         |                         |                      |        |                       |                       |                      |        |                   |                   |                      |        |
| Global                 | — | — | — | — | 271.76 (148.44, 468.97) | 311.64 (172.92, 544.14) | 0.48 (0.38, 0.58)    | <0.001 | 71.69 (61.73, 84.03)  | 66.35 (55.96, 81.74)  | -0.25 (-0.40, -0.10) | 0.001  | 1.11 (0.98, 1.23) | 0.96 (0.84, 1.08) | -0.46 (-0.62, -0.31) | <0.001 |
| <b>SDI category</b>    |   |   |   |   |                         |                         |                      |        |                       |                       |                      |        |                   |                   |                      |        |
| High                   | — | — | — | — | 581.76 (340.92, 960.49) | 501.79 (312.27, 766.07) | -0.52 (-0.59, -0.45) | <0.001 | 81.28 (65.54, 103.71) | 77.93 (63.75, 96.77)  | -0.16 (-0.42, 0.09)  | 0.213  | 0.98 (0.91, 1.15) | 1.00 (0.86, 1.24) | 0.02 (-0.29, 0.34)   | 0.893  |
| High-middle            | — | — | — | — | 166.83 (89.84, 285.39)  | 215.74 (127.34, 341.16) | 0.88 (0.85, 0.92)    | <0.001 | 55.07 (48.83, 62.93)  | 47.61 (39.49, 60.06)  | -0.49 (-0.82, -0.16) | 0.004  | 0.89 (0.81, 0.99) | 0.70 (0.60, 0.91) | -0.64 (-0.87, -0.40) | <0.001 |
| Middle                 | — | — | — | — | 170.72 (90.26, 298.53)  | 246.47 (135.31, 428.38) | 1.33 (1.14, 1.52)    | <0.001 | 56.96 (48.96, 66.56)  | 51.30 (41.98, 64.05)  | -0.32 (-0.49, -0.15) | <0.001 | 0.92 (0.79, 1.05) | 0.74 (0.63, 0.86) | -0.74 (-0.88, -0.59) | <0.001 |
| Low-middle             | — | — | — | — | 211.30 (110.10, 311.50) | 272.52 (141.84, 403.20) | 0.89 (0.80, 0.97)    | <0.001 | 84.34 (67.84, 103.70) | 77.80 (62.56, 96.50)  | -0.24 (-0.50, 0.02)  | 0.073  | 1.42 (1.16, 1.68) | 1.23 (0.99, 1.47) | -0.48 (-0.86, -0.10) | 0.011  |

|                      |   |   |   |   |                |                |             |        |               |                |         |        |        |        |         |        |
|----------------------|---|---|---|---|----------------|----------------|-------------|--------|---------------|----------------|---------|--------|--------|--------|---------|--------|
|                      |   |   |   |   | 380.79)        | 489.22)        |             |        |               |                | 0.02)   | 1.72)  | 1.50)  | -0.11) |         |        |
|                      |   |   |   |   | 449.03         | 519.44         |             |        | 132.62        |                | -0.79   | 2.11   | 1.51   | -1.16  |         |        |
| Low                  | — | — | — | — | (201.99,       | (233.49,       | 0.50 (0.46, | <0.001 | (103.47,      | 105.47 (81.21, | (-0.90, | <0.001 | (1.65, | (1.21, | (-1.34, | <0.001 |
|                      |   |   |   |   | 951.96)        | 1111.47)       | 0.54)       |        | 166.34)       | 142.55)        | -0.68)  |        | 2.65)  | 1.91)  | -0.97)  |        |
| <b>21 GBD region</b> |   |   |   |   |                |                |             |        |               |                |         |        |        |        |         |        |
|                      |   |   |   |   | 180.72 (98.87, | 182.34         | 0.03 (0.01, |        | 81.16 (63.44, | 70.91 (53.25,  | -0.56   |        | 1.39   | 1.19   | -0.64   |        |
| South Asia           | — | — | — | — | 310.86)        | (100.52,       | 0.04)       | <0.001 | 102.31)       | 89.81)         | (-0.97, | 0.007  | (1.07, | (0.87, | (-1.11, | 0.008  |
|                      |   |   |   |   |                | 312.07)        |             |        |               |                | -0.15)  |        | 1.76)  | 1.54)  | -0.17)  |        |
|                      |   |   |   |   | 57.79 (31.30,  | 98.65 (54.45,  | 1.84 (1.71, |        | 27.54 (20.76, | 17.46 (12.86,  | -1.58   |        | 0.47   | 0.23   | -2.50   |        |
| East Asia            | — | — | — | — | 98.63)         | 170.32)        | 1.98)       | <0.001 | 34.52)        | 23.12)         | (-1.77, | <0.001 | (0.35, | (0.17, | (-2.84, | <0.001 |
|                      |   |   |   |   |                |                |             |        |               |                | -1.40)  |        | 0.60)  | 0.31)  | -2.15)  |        |
|                      |   |   |   |   | 591.02         | 564.88         | -0.16       |        | 136.64        |                | -0.72   |        | 2.04   | 1.57   | -0.90   |        |
| North Africa and     | — | — | — | — | (311.25,       | (317.12,       | (-0.23,     | <0.001 | (105.02,      | 110.83 (82.94, | (-0.83, | <0.001 | (1.44, | (1.12, | (-1.02, | <0.001 |
| Middle East          |   |   |   |   | 1008.26)       | 955.12)        | -0.10)      |        | 169.48)       | 143.01)        | -0.60)  |        | 2.47)  | 2.01)  | -0.77)  |        |
|                      |   |   |   |   | 724.14         | 821.81         | 0.44 (0.41, |        | 153.59        | 100.95 (70.66, | -1.44   |        | 2.23   | 1.11   | -2.38   |        |
| Western              | — | — | — | — | (321.08,       | (367.72,       | 0.48)       | <0.001 | (111.15,      | 153.14)        | (-1.53, | <0.001 | (1.62, | (0.83, | (-2.52, | <0.001 |
| Sub-Saharan Africa   |   |   |   |   | 1516.76)       | 1737.14)       |             |        | 207.28)       |                | -1.35)  |        | 2.95)  | 1.50)  | -2.24)  |        |
|                      |   |   |   |   | 151.48 (82.77, | 151.08 (82.87, | -0.01       |        | 64.31 (51.86, | 44.95 (35.91,  | -1.22   |        | 1.09   | 0.71   | -1.43   |        |
| Southeast Asia       | — | — | — | — | 256.17)        | 248.66)        | (-0.03,     | 0.254  | 78.00)        | 54.91)         | (-1.28, | <0.001 | (0.86, | (0.55, | (-1.52, | <0.001 |
|                      |   |   |   |   |                |                | 0.01)       |        |               |                | -1.16)  |        | 1.32)  | 0.88)  | -1.33)  |        |
|                      |   |   |   |   | 699.65         | 812.66         | 0.52 (0.50, |        | 166.18        | 120.70 (83.37, | -1.10   |        | 2.50   | 1.51   | -1.75   |        |
| Eastern Sub-Saharan  | — | — | — | — | (301.34,       | (354.26,       | 0.54)       | <0.001 | (122.20,      | 183.32)        | (-1.17, | <0.001 | (1.86, | (1.11, | (-1.84, | <0.001 |
| Africa               |   |   |   |   | 1528.75)       | 1740.88)       |             |        | 227.36)       |                | -1.03)  |        | 3.46)  | 2.21)  | -1.65)  |        |
|                      |   |   |   |   | 265.08         | 369.88         | 1.16 (1.10, |        | 75.45 (64.89, | 62.86 (47.89,  | -0.65   |        | 1.19   | 0.84   | -1.13   |        |
| Central Latin        | — | — | — | — | (104.29,       | (200.18,       | 1.21)       | <0.001 | 89.90)        | 82.60)         | (-1.07, | 0.003  | (1.09, | (0.63, | (-1.39, | <0.001 |
| America              |   |   |   |   | 515.53)        | 620.80)        |             |        |               |                | -0.22)  |        | 1.30)  | 1.06)  | -0.86)  |        |
|                      |   |   |   |   | 245.81         | 309.29         | 0.80 (0.78, |        | 89.61 (78.42, | 90.35 (76.86,  | 0.04    |        | 1.48   | 1.43   | -0.11   |        |
| Tropical Latin       | — | — | — | — | (109.22,       | (157.70,       | 0.81)       | <0.001 | 103.79)       | 110.19)        | (-0.14, | 0.676  | (1.36, | (1.25, | (-0.34, | 0.334  |
| America              |   |   |   |   | 467.20)        | 548.27)        |             |        |               |                | 0.22)   |        | 1.65)  | 1.69)  | 0.12)   |        |
|                      |   |   |   |   | 619.39         | 661.96         | 0.24 (0.17, |        | 116.58        | 103.84 (63.66, | -0.42   |        | 1.63   | 1.33   | -0.78   |        |
| Central Sub-Saharan  | — | — | — | — | (255.02,       | (270.41,       | 0.31)       | <0.001 | (74.53,       | 164.44)        | (-0.56, | <0.001 | (1.02, | (0.83, | (-0.93, | <0.001 |
| Africa               |   |   |   |   | 1351.68)       | 1496.50)       |             |        | 182.41)       |                | -0.29)  |        | 2.64)  | 2.21)  | -0.64)  |        |
|                      |   |   |   |   | 398.32         | 362.07         | -0.34       | <0.001 | 70.67 (58.22, | 54.98 (43.78,  | -0.86   | <0.001 | 0.96   | 0.69   | -1.07   | <0.001 |
| Western Europe       | — | — | — | — |                |                |             |        |               |                |         |        |        |        |         |        |

|                             |   |   |   |   |                |               |             |        |               |                |         |        |        |         |             |        |
|-----------------------------|---|---|---|---|----------------|---------------|-------------|--------|---------------|----------------|---------|--------|--------|---------|-------------|--------|
|                             |   |   |   |   | (219.69,       | (202.49,      | (-0.40,     |        | 89.02)        | 70.01)         | (-1.06, | (0.87, | (0.61, | (-1.45, |             |        |
|                             |   |   |   |   | 667.80)        | 575.16)       | -0.28)      |        |               |                | (-0.66) | 1.17)  | 0.89)  | (-0.70) |             |        |
|                             |   |   |   |   | 914.96         | 770.20        | -0.59       |        | 106.72        |                | 0.49    | 1.13   | 1.58   |         |             |        |
| High-income North America   | — | — | — | — | (514.25,       | (486.92,      | (-0.69,     | <0.001 | (82.02,       | 121.94 (99.65, | (0.25,  | <0.001 | (1.02, | (1.39,  | 1.06 (0.58, | <0.001 |
|                             |   |   |   |   | 1504.91)       | 1182.44)      | -0.49)      |        | 144.13)       | 151.99)        | 0.73)   |        | 1.40)  | 2.01)   | 1.54)       |        |
|                             |   |   |   |   |                |               | -0.30       |        |               |                | -0.57   |        | 1.21   | 0.99    | -0.60       |        |
| Central Asia                | — | — | — | — | 74.61 (39.83,  | 68.50 (36.30, | (-0.31,     | <0.001 | 66.45 (54.54, | 55.25 (42.95,  | (-1.01, | 0.012  | (0.98, | (0.76,  | (-1.07,     | 0.015  |
|                             |   |   |   |   | 123.47)        | 111.56)       | -0.28)      |        | 78.53)        | 80.85)         | (-0.13) |        | 1.43)  | 1.49)   | (-0.12)     |        |
|                             |   |   |   |   |                |               | 0.14 (0.11, |        |               |                | 2.16    |        | 0.78   | 1.30    | 2.30 (1.33, |        |
| Eastern Europe              | — | — | — | — | 64.72 (34.03,  | 67.31 (36.20, | 0.17)       | <0.001 | 43.76 (36.22, | 70.89 (53.63,  | (1.24,  | <0.001 | (0.64, | (0.97,  | 3.29)       | <0.001 |
|                             |   |   |   |   | 120.12)        | 121.28)       |             |        | 52.62)        | 109.23)        | 3.09)   |        | 0.93)  | 2.01)   |             |        |
|                             |   |   |   |   |                |               | 0.12 (0.10, |        |               |                | -0.84   |        | 1.60   | 1.13    | -1.07       |        |
| Southern Sub-Saharan Africa | — | — | — | — | (154.66,       | (157.27,      | 0.15)       | <0.001 | (75.91,       | 76.81 (50.91,  | (-1.65, | 0.046  | (1.20, | (0.73,  | (-2.19,     | 0.062  |
|                             |   |   |   |   | 699.55)        | 730.26)       |             |        | 126.92)       | 107.69)        | (-0.01) |        | 1.99)  | 1.61)   | 0.05)       |        |
|                             |   |   |   |   |                |               | -0.38       |        |               |                | -1.20   |        | 0.50   | 0.29    | -1.90       |        |
| High-income Asia Pacific    | — | — | — | — | (168.11,       | (162.80,      | (-0.42,     | <0.001 | 42.59 (32.49, | 29.91 (21.60,  | (-1.38, | <0.001 | (0.43, | (0.24,  | (-2.23,     | <0.001 |
|                             |   |   |   |   | 509.40)        | 431.85)       | -0.34)      |        | 57.15)        | 42.77)         | (-1.02) |        | 0.66)  | 0.48)   | (-1.56)     |        |
|                             |   |   |   |   |                |               | 0.11 (0.01, |        |               |                | -2.55   |        | 1.77   | 0.67    | -3.37       |        |
| Central Europe              | — | — | — | — | (166.62,       | (175.72,      | 0.20)       | 0.027  | (97.77,       | 51.67 (40.17,  | (-2.86, | <0.001 | (1.65, | (0.52,  | (-3.97,     | <0.001 |
|                             |   |   |   |   | 516.42)        | 508.86)       |             |        | 121.51)       | 66.59)         | (-2.24) |        | 1.89)  | 0.84)   | (-2.77)     |        |
|                             |   |   |   |   |                |               | 0.82 (0.76, |        |               |                | -1.90   |        | 1.49   | 0.72    | -2.41       |        |
| Andean Latin America        | — | — | — | — | 222.96 (86.55, | 283.07        | 0.88)       | <0.001 | 88.91 (68.79, | 52.47 (36.67,  | (-2.14, | <0.001 | (1.15, | (0.49,  | (-3.60,     | <0.001 |
|                             |   |   |   |   | 438.95)        | (143.08,      |             |        | 113.61)       | 72.40)         | (-1.67) |        | 1.90)  | 1.03)   | (-1.22)     |        |
|                             |   |   |   |   |                |               | 0.21 (0.19, |        |               |                | 0.39    |        | 2.26   | 2.54    | 0.41 (0.12, |        |
| Caribbean                   | — | — | — | — | (124.47,       | (129.64,      | 0.23)       | <0.001 | (97.29,       | 144.31 (97.44, | (0.14,  | 0.002  | (1.68, | (1.64,  | 0.70)       | 0.005  |
|                             |   |   |   |   | 392.12)        | 418.39)       |             |        | 171.79)       | 216.86)        | 0.64)   |        | 3.06)  | 3.91)   |             |        |
|                             |   |   |   |   |                |               | 3.70 (3.41, |        |               |                | -0.66   |        | 1.57   | 1.00    | -1.46       |        |
| Southern Latin America      | — | — | — | — | 129.98 (4.67,  | 376.87        | 3.99)       | <0.001 | 88.25 (71.08, | 71.62 (54.59,  | (-0.93, | <0.001 | (1.31, | (0.77,  | (-2.10,     | <0.001 |
|                             |   |   |   |   | 377.36)        | (186.93,      |             |        | 109.69)       | 92.65)         | (-0.39) |        | 1.90)  | 1.26)   | (-0.81)     |        |
|                             |   |   |   |   |                |               | -0.41       |        |               |                | -0.35   |        | 1.16   | 1.07    | -0.34       |        |
| Oceania                     | — | — | — | — | 90.88 (47.71,  | 80.61 (41.16, | (-0.45,     | <0.001 | 65.08 (42.30, | 59.48 (36.73,  | (-0.48, | <0.001 | (0.74, | (0.63,  | (-0.48,     | <0.001 |
|                             |   |   |   |   | 160.19)        | 139.43)       | -0.38)      |        | 92.40)        | 90.17)         | (-0.22) |        | 1.68)  | 1.65)   | (-0.20)     |        |
|                             |   |   |   |   |                |               | -0.09       |        |               |                | 0.55    | 0.003  | 0.48   | 0.65    | 1.09 (0.55, | <0.001 |
| Australasia                 | — | — | — | — | 413.58         | 404.49        |             | <0.001 | 46.86 (33.12, | 54.96 (39.36,  |         |        |        |         |             |        |

|                              |   |   |   |   |                         |                         |                      |        |                        |                        |                      |              |                   |                   |                      |        |
|------------------------------|---|---|---|---|-------------------------|-------------------------|----------------------|--------|------------------------|------------------------|----------------------|--------------|-------------------|-------------------|----------------------|--------|
|                              |   |   |   |   | (225.65, 698.69)        | (225.12, 651.90)        | (-0.13, -0.05)       |        | 65.99                  | 74.31                  | (0.19, 0.92)         | (0.38, 0.66) | (0.46, 0.89)      | 1.64              |                      |        |
| <b>Men</b>                   |   |   |   |   |                         |                         |                      |        |                        |                        |                      |              |                   |                   |                      |        |
| Global                       | — | — | — | — | 129.88 (70.85, 232.71)  | 156.23 (85.73, 276.82)  | 0.66 (0.54, 0.79)    | <0.001 | 71.15 (62.06, 88.06)   | 65.93 (57.60, 77.28)   | -0.22 (-0.33, -0.11) | <0.001       | 1.24 (1.09, 1.56) | 1.11 (0.98, 1.29) | -0.34 (-0.47, -0.20) | <0.001 |
| <b>SDI category</b>          |   |   |   |   |                         |                         |                      |        |                        |                        |                      |              |                   |                   |                      |        |
| High                         | — | — | — | — | 225.34 (127.85, 372.42) | 193.33 (121.10, 294.36) | -0.51 (-0.57, -0.44) | <0.001 | 67.60 (60.39, 76.95)   | 54.73 (48.05, 64.26)   | -0.73 (-0.94, -0.52) | <0.001       | 1.07 (1.01, 1.18) | 0.86 (0.77, 1.00) | -0.80 (-1.18, -0.41) | <0.001 |
| High-middle                  | — | — | — | — | 91.72 (50.71, 155.45)   | 119.83 (69.98, 195.28)  | 0.92 (0.87, 0.98)    | <0.001 | 71.00 (63.84, 81.83)   | 57.93 (50.33, 70.24)   | -0.65 (-0.91, -0.38) | <0.001       | 1.28 (1.15, 1.47) | 0.99 (0.87, 1.23) | -0.81 (-1.11, -0.50) | <0.001 |
| Middle                       | — | — | — | — | 98.78 (51.25, 179.83)   | 147.09 (78.78, 264.82)  | 1.42 (1.28, 1.55)    | <0.001 | 57.26 (47.78, 73.59)   | 53.67 (45.96, 64.23)   | -0.22 (-0.40, -0.05) | 0.011        | 1.00 (0.84, 1.31) | 0.88 (0.77, 1.04) | -0.42 (-0.68, -0.16) | 0.002  |
| Low-middle                   | — | — | — | — | 107.32 (56.26, 194.75)  | 133.34 (69.32, 247.89)  | 0.75 (0.71, 0.80)    | <0.001 | 81.09 (62.89, 115.22)  | 80.17 (66.52, 98.26)   | 0.06 (-0.39, 0.52)   | 0.788        | 1.46 (1.12, 2.11) | 1.41 (1.16, 1.75) | 0.00 (-0.50, 0.51)   | 0.987  |
| Low                          | — | — | — | — | 219.95 (101.51, 448.44) | 249.48 (115.57, 508.24) | 0.43 (0.41, 0.45)    | <0.001 | 116.03 (90.97, 162.67) | 101.91 (78.13, 139.32) | -0.44 (-0.69, -0.20) | <0.001       | 2.02 (1.58, 2.89) | 1.71 (1.32, 2.38) | -0.54 (-0.74, -0.34) | <0.001 |
| <b>21 GBD region</b>         |   |   |   |   |                         |                         |                      |        |                        |                        |                      |              |                   |                   |                      |        |
| South Asia                   | — | — | — | — | 85.36 (45.59, 150.43)   | 82.54 (44.08, 145.88)   | -0.13 (-0.15, -0.10) | <0.001 | 81.34 (57.42, 127.17)  | 75.18 (58.69, 98.67)   | -0.20 (-0.86, 0.46)  | 0.553        | 1.48 (1.03, 2.36) | 1.37 (1.04, 1.82) | -0.21 (-0.91, 0.50)  | 0.562  |
| East Asia                    | — | — | — | — | 54.02 (28.90, 91.84)    | 87.21 (47.33, 146.92)   | 1.66 (1.55, 1.76)    | <0.001 | 32.87 (24.08, 45.64)   | 22.70 (17.65, 29.11)   | -1.31 (-1.55, -1.07) | <0.001       | 0.58 (0.41, 0.82) | 0.35 (0.27, 0.44) | -1.78 (-2.11, -1.44) | <0.001 |
| North Africa and Middle East | — | — | — | — | 372.13 (201.01, 628.11) | 343.83 (194.37, 583.11) | -0.27 (-0.31, -0.22) | <0.001 | 124.92 (99.17, 156.52) | 91.05 (71.50, 115.70)  | -1.08 (-1.20, -0.95) | <0.001       | 2.03 (1.60, 2.56) | 1.40 (1.11, 1.79) | -1.26 (-1.39, -1.13) | <0.001 |
| Western                      | — | — | — | — | 421.16                  | 460.39                  | 0.31 (0.28, 0.31)    | <0.001 | 138.82                 | 114.74 (82.52, 138.82) | -0.64                | <0.001       | 2.25              | 1.74              | -0.86                | <0.001 |



|                             |   |   |   |   |                         |                         |                      |        |                         |                         |                |        |                   |                   |                      |        |
|-----------------------------|---|---|---|---|-------------------------|-------------------------|----------------------|--------|-------------------------|-------------------------|----------------|--------|-------------------|-------------------|----------------------|--------|
| Sub-Saharan Africa          |   |   |   |   | (191.03, 874.89)        | (205.76, 963.62)        | 0.33                 |        | (102.92, 200.46)        | 163.88)                 | (-0.74, -0.54) |        | (1.65, 3.50)      | (1.25, 2.56)      | (-0.98, -0.73)       |        |
|                             |   |   |   |   |                         |                         |                      |        |                         |                         | -0.75          |        | 1.17              | 0.90              | -0.87                |        |
| Southeast Asia              | — | — | — | — | 104.67 (58.15, 178.38)  | 116.12 (64.15, 195.41)  | 0.35 (0.33, 0.37)    | <0.001 | 66.22 (53.54, 85.58)    | 53.00 (42.25, 68.33)    | (-0.96, -0.53) | <0.001 | (0.93, 1.51)      | (0.72, 1.18)      | (-1.12, -0.62)       | <0.001 |
|                             |   |   |   |   |                         |                         |                      |        |                         |                         |                |        |                   |                   |                      |        |
| Eastern Sub-Saharan Africa  | — | — | — | — | 307.38 (134.91, 661.59) | 347.56 (150.65, 743.04) | 0.42 (0.40, 0.44)    | <0.001 | 137.08 (104.81, 206.60) | 105.53 (76.61, 160.74)  | (-0.90, -1.00) | <0.001 | 2.34 (1.78, 3.53) | 1.68 (1.21, 2.77) | -1.14 (-1.29, -1.00) | <0.001 |
|                             |   |   |   |   |                         |                         |                      |        |                         |                         |                |        |                   |                   |                      |        |
| Central Latin America       | — | — | — | — | 37.41 (2.37, 111.22)    | 119.72 (56.34, 217.68)  | 4.08 (4.00, 4.15)    | <0.001 | 57.66 (52.54, 64.01)    | 49.82 (38.68, 60.40)    | (-0.72, -0.17) | 0.001  | (0.99, 1.18)      | (0.66, 1.02)      | (-1.39, -0.15)       | 0.015  |
|                             |   |   |   |   |                         |                         |                      |        |                         |                         |                |        |                   |                   |                      |        |
| Tropical Latin America      | — | — | — | — | 41.84 (5.88, 101.14)    | 89.05 (43.02, 162.68)   | 2.63 (2.52, 2.75)    | <0.001 | 81.54 (74.49, 89.32)    | 69.42 (61.52, 78.68)    | (-0.52, -0.85) | 0.002  | 1.53 (1.40, 1.67) | 1.25 (1.11, 1.42) | -0.67 (-1.02, -0.31) | <0.001 |
|                             |   |   |   |   |                         |                         |                      |        |                         |                         |                |        |                   |                   |                      |        |
| Central Sub-Saharan Africa  | — | — | — | — | 259.52 (107.50, 581.00) | 271.74 (113.37, 619.29) | 0.16 (0.14, 0.17)    | <0.001 | 108.48 (69.62, 175.39)  | 93.25 (58.54, 155.10)   | (-0.54, -0.64) | <0.001 | 1.83 (1.13, 3.06) | 1.52 (0.93, 2.71) | -0.66 (-0.76, -0.55) | <0.001 |
|                             |   |   |   |   |                         |                         |                      |        |                         |                         |                |        |                   |                   |                      |        |
| Western Europe              | — | — | — | — | 139.17 (76.89, 235.25)  | 131.46 (74.72, 211.94)  | -0.21 (-0.29, -0.13) | <0.001 | 65.32 (58.80, 73.67)    | 45.31 (39.61, 52.61)    | (-1.29, -1.60) | <0.001 | 1.12 (1.02, 1.24) | 0.74 (0.67, 0.84) | -1.46 (-1.80, -1.12) | <0.001 |
|                             |   |   |   |   |                         |                         |                      |        |                         |                         |                |        |                   |                   |                      |        |
| High-income North America   | — | — | — | — | 319.83 (178.74, 535.11) | 240.73 (149.88, 374.42) | -0.97 (-1.04, -0.90) | <0.001 | 77.64 (67.32, 92.54)    | 79.68 (68.63, 93.41)    | (0.14, -0.19)  | 0.412  | 1.17 (1.09, 1.32) | 1.29 (1.12, 1.52) | 0.34 (-0.11, 0.79)   | 0.138  |
|                             |   |   |   |   |                         |                         |                      |        |                         |                         |                |        |                   |                   |                      |        |
| Central Asia                | — | — | — | — | 47.68 (24.53, 80.98)    | 47.12 (24.27, 80.29)    | -0.04 (-0.05, -0.03) | <0.001 | 106.63 (89.62, 128.77)  | 80.41 (64.82, 106.23)   | (-0.99, -1.30) | <0.001 | 2.01 (1.69, 2.44) | 1.50 (1.21, 2.00) | -1.02 (-1.34, -0.70) | <0.001 |
|                             |   |   |   |   |                         |                         |                      |        |                         |                         |                |        |                   |                   |                      |        |
| Eastern Europe              | — | — | — | — | 34.56 (18.75, 63.46)    | 35.41 (18.94, 64.85)    | 0.08 (0.07, 0.09)    | <0.001 | 70.48 (60.96, 89.00)    | 138.79 (112.71, 195.45) | (2.88, 1.91)   | <0.001 | 1.33 (1.14, 1.68) | 2.64 (2.14, 3.75) | 2.93 (1.95, 3.91)    | <0.001 |
|                             |   |   |   |   |                         |                         |                      |        |                         |                         |                |        |                   |                   |                      |        |
| Southern Sub-Saharan Africa | — | — | — | — | 190.80 (86.18, 403.35)  | 192.46 (87.55, 403.42)  | 0.02 (0.01, 0.04)    | 0.002  | 113.09 (89.52, 141.45)  | 96.63 (69.38, 134.08)   | (-0.55, -1.32) | 0.169  | 1.99 (1.56, 2.52) | 1.67 (1.19, 2.37) | -0.60 (-1.47, 0.27)  | 0.174  |
|                             |   |   |   |   |                         |                         |                      |        |                         |                         |                |        |                   |                   |                      |        |
| High-income Asia            | — | — | — | — | 211.38                  | 209.21                  | -0.04                | 0.421  | 44.30 (36.29, 44.30)    | 29.33 (22.70, 29.33)    | (-1.42, -1.42) | <0.001 | 0.63              | 0.35              | -2.07                | <0.001 |

|                           |   |   |   |   |                           |                           |                            |        |                              |                           |                             |                 |                         |                         |                            |        |
|---------------------------|---|---|---|---|---------------------------|---------------------------|----------------------------|--------|------------------------------|---------------------------|-----------------------------|-----------------|-------------------------|-------------------------|----------------------------|--------|
| Pacific                   |   |   |   |   | (119.19,<br>347.78)       | (125.52,<br>329.06)       | (-0.14,<br>0.06)           |        | 54.72)                       | 38.28)                    | (-1.69,<br>-1.16)           | (0.54,<br>0.75) | (0.30,<br>0.44)         | (-2.44,<br>-1.70)       |                            |        |
|                           |   |   |   |   |                           |                           |                            |        | 158.36                       |                           | -2.79                       | 2.90            | 1.20                    | -3.06                   |                            |        |
| Central Europe            | — | — | — | — | 156.57 (84.62,<br>259.01) | 159.78 (90.33,<br>259.69) | 0.07 (-0.02,<br>0.15)      | 0.124  | (147.25,<br>170.53)          | 70.59 (58.99,<br>83.47)   | (-3.14,<br>-2.44)           | <0.001          | (2.71,<br>3.11)         | (0.99,<br>1.42)         | (-3.43,<br>-2.69)          | <0.001 |
| Andean Latin<br>America   | — | — | — | — | 52.09 (1.59,<br>155.92)   | 128.84 (58.84,<br>229.74) | 3.16 (2.89,<br>3.43)       | <0.001 | 87.01 (64.25,<br>111.12)     | 46.32 (32.28,<br>68.27)   | (-2.58,<br>-1.58)           | <0.001          | (1.22,<br>2.08)         | (0.51,<br>1.14)         | (-3.09,<br>-1.96)          | <0.001 |
| Caribbean                 | — | — | — | — | 97.31 (50.42,<br>165.70)  | 117.01 (60.00,<br>198.64) | 0.64 (0.61,<br>0.68)       | <0.001 | 96.24 (76.86,<br>120.08)     | 106.82 (77.37,<br>149.22) | (0.12,<br>0.61)             | 0.003           | (1.38,<br>2.22)         | (1.39,<br>2.75)         | 0.35 (0.09,<br>0.61)       | 0.008  |
| Southern Latin<br>America | — | — | — | — | 15.55 (1.60,<br>106.71)   | 151.91 (69.82,<br>275.24) | 8.05 (7.75,<br>8.34)       | <0.001 | 88.47 (72.92,<br>107.63)     | 66.98 (53.43,<br>83.12)   | (-1.42,<br>-0.42)           | <0.001          | (1.39,<br>2.08)         | (0.90,<br>1.42)         | (-1.88,<br>-0.80)          | <0.001 |
| Oceania                   | — | — | — | — | 94.57 (49.00,<br>171.99)  | 92.65 (46.48,<br>162.24)  | -0.07<br>(-0.11,<br>-0.04) | <0.001 | 136.10<br>(90.22,<br>193.86) | 120.30 (77.81,<br>178.74) | (-0.42,<br>-0.48,<br>-0.36) | <0.001          | 2.54<br>(1.63,<br>3.67) | 2.23<br>(1.41,<br>3.33) | -0.43<br>(-0.50,<br>-0.37) | <0.001 |
| Australasia               | — | — | — | — | 150.20 (80.55,<br>237.96) | 147.12 (80.51,<br>243.06) | -0.08<br>(-0.12,<br>-0.04) | <0.001 | 30.60 (23.55,<br>41.24)      | 37.11 (26.84,<br>50.02)   | (0.24,<br>1.10)             | 0.002           | (0.35,<br>0.55)         | (0.40,<br>0.76)         | 0.91 (0.18,<br>1.65)       | 0.014  |

CI, confidence interval; GBD, global burden disease

“—” indicates that data are unavailable; \* significantly different from zero ( $P < 0.05$ ). The estimates on atrial fibrillation burden for people aged 15-29 years in the GBD database were all treated as “0”. Therefore, we used “0” to calculate the age-standardized burden of atrial fibrillation.

**Table S3 Age-standardized incidence, prevalence, disability-adjusted life years, and death rate of the overall and type-specific cardiovascular disease in youths and young adults from 1990 to 2019 by sex and countries/territories**

|                                | Incidence                         |                                   |                                          |         | Prevalence                        |                                   |                                          |         | Disability-adjusted life years    |                                   |                                          |         | Death                             |                                   |                                          |         |
|--------------------------------|-----------------------------------|-----------------------------------|------------------------------------------|---------|-----------------------------------|-----------------------------------|------------------------------------------|---------|-----------------------------------|-----------------------------------|------------------------------------------|---------|-----------------------------------|-----------------------------------|------------------------------------------|---------|
|                                | Rate per 100,000 (95% CI) in 1990 | Rate per 100,000 (95% CI) in 2019 | Average annual percent change % (95% CI) | P-value | Rate per 100,000 (95% CI) in 1990 | Rate per 100,000 (95% CI) in 2019 | Average annual percent change % (95% CI) | P-value | Rate per 100,000 (95% CI) in 1990 | Rate per 100,000 (95% CI) in 2019 | Average annual percent change % (95% CI) | P-value | Rate per 100,000 (95% CI) in 1990 | Rate per 100,000 (95% CI) in 2019 | Average annual percent change % (95% CI) | P-value |
| <b>Cardiovascular diseases</b> |                                   |                                   |                                          |         |                                   |                                   |                                          |         |                                   |                                   |                                          |         |                                   |                                   |                                          |         |
| <b>Overall</b>                 |                                   |                                   |                                          |         |                                   |                                   |                                          |         |                                   |                                   |                                          |         |                                   |                                   |                                          |         |
| Afghanistan                    | 170.49<br>(165.77, 175.32)        | 174.49<br>(172.17, 176.82)        | 0.08<br>(0.07, 0.09)                     | <0.001  | 1723.11<br>(1708.15, 1738.20)     | 1789.73<br>(1782.35, 1797.13)     | 0.15<br>(0.10, 0.20)                     | <0.001  | 3411.05<br>(3388.96, 3433.26)     | 2255.35<br>(2246.60, 2264.12)     | -1.33<br>(-1.47, -1.20)                  | <0.001  | 57.82<br>(54.95, 60.82)           | 37.61<br>(36.47, 38.77)           | -1.39<br>(-1.53, -1.25)                  | <0.001  |
| Albania                        | 136.22<br>(130.14, 142.53)        | 136.62<br>(129.33, 144.23)        | 0.02<br>(-0.01, 0.05)                    | 0.192   | 2216.46<br>(2191.74, 2241.41)     | 2248.05<br>(2218.17, 2278.24)     | 0.05<br>(-0.01, 0.11)                    | 0.072   | 1023.31<br>(1006.39, 1040.45)     | 1091.89<br>(1071.16, 1112.93)     | 0.08<br>(-0.72, 0.90)                    | 0.841   | 14.73<br>(12.75, 16.94)           | 15.93<br>(13.51, 18.67)           | 0.10<br>(-0.85, 1.05)                    | 0.843   |
| Algeria                        | 131.24<br>(128.87, 133.64)        | 120.65<br>(119.03, 122.29)        | -0.29<br>(-0.31, -0.27)                  | <0.001  | 1578.30<br>(1570.08, 1586.56)     | 1608.50<br>(1602.55, 1614.46)     | 0.09<br>(-0.01, 0.18)                    | 0.063   | 2057.11<br>(2047.50, 2066.76)     | 987.40<br>(982.80, 992.00)        | -2.47<br>(-2.73, -2.21)                  | <0.001  | 33.65<br>(32.42, 34.92)           | 15.06<br>(14.50, 15.64)           | -2.64<br>(-2.89, -2.39)                  | <0.001  |
| American Samoa                 | 141.48<br>(92.99, 207.73)         | 145.87<br>(96.61, 212.88)         | 0.11<br>(0.09, 0.13)                     | <0.001  | 1859.58<br>(1671.01, 2064.79)     | 1886.23<br>(1697.15, 2091.89)     | 0.05<br>(0.03, 0.07)                     | <0.001  | 1775.84<br>(1587.47, 1981.33)     | 1779.92<br>(1591.28, 1985.70)     | 0.01<br>(-0.15, 0.16)                    | 0.937   | 27.98<br>(9.08, 66.71)            | 28.03<br>(9.12, 66.83)            | 0.00<br>(-0.17, 0.18)                    | 0.986   |
| Andorra                        | 68.85<br>(40.75, 111.65)          | 66.07<br>(38.83, 107.40)          | -0.14<br>(-0.18, -0.10)                  | <0.001  | 594.25<br>(504.17, 697.81)        | 596.65<br>(507.69, 698.50)        | 0.03<br>(-0.04, 0.10)                    | 0.359   | 350.11<br>(282.06, 431.80)        | 237.22<br>(183.38, 304.05)        | -1.32<br>(-1.41, -1.23)                  | <0.001  | 5.19<br>(0.31, 28.43)             | 3.27<br>(0.07, 24.26)             | -1.57<br>(-1.66, -1.47)                  | <0.001  |
| Angola                         | 182.49<br>(178.22, 185.07)        | 167.49<br>(165.07, 169.91)        | -0.29<br>(-0.30, -0.28)                  | <0.001  | 2805.50<br>(2788.65, 2822.35)     | 2880.98<br>(2870.83, 2891.13)     | 0.10<br>(0.04, 0.16)                     | 0.001   | 1304.11<br>(1292.31, 1315.91)     | 931.91<br>(925.95, 937.87)        | -1.13<br>(-1.82, -0.44)                  | 0.001   | 19.54<br>(18.11, 20.97)           | 13.09<br>(12.39, 13.79)           | -1.34<br>(-2.14, -0.54)                  | 0.001   |

|                     |          |          |         |        |          |          |         |        |          |          |         |        |         |         |         |        |
|---------------------|----------|----------|---------|--------|----------|----------|---------|--------|----------|----------|---------|--------|---------|---------|---------|--------|
|                     | 186.85)  | 169.95)  | -0.28)  |        | ,        | ,        | 0.16)   |        | ,        | 937.90)  | -0.44)  |        | 21.07)  | 13.84)  | -0.53)  |        |
|                     |          |          |         |        | 2822.42) | 2891.16) |         |        |          | 1316.00) |         |        |         |         |         |        |
|                     |          |          |         |        | 2542.45  | 2521.67  |         |        |          |          |         |        |         |         |         |        |
| Antigua and Barbuda | 174.13   | 172.02   | -0.04   |        | (2349.81 | (2357.67 | -0.02   |        | 997.51   | 621.65   | -1.60   |        | 15.01   | 8.41    | -1.95   |        |
|                     | (126.53, | (131.25, | (-0.06, | <0.001 |          |          | (-0.04, | 0.003  | (876.86, | (542.15, | (-2.45, | <0.001 | (3.78,  | (1.73,  | (-3.02, | <0.001 |
|                     | 234.45)  | 221.86)  | -0.03)  |        | ,        | ,        |         |        |          |          |         |        |         |         |         |        |
|                     |          |          |         |        | 2747.26) | 2694.42) | -0.01)  |        | 1130.63) | 709.94)  | -0.75)  |        | 40.79)  | 25.47)  | -0.88)  |        |
|                     |          |          |         |        | 1617.04  | 1702.00  |         |        |          |          |         |        |         |         |         |        |
| Argentina           | 117.76   | 110.76   | -0.21   |        | (1609.89 | (1695.90 | 0.18    |        | 1226.31  | 601.06   | -2.43   |        | 19.36   | 8.44    | -2.81   |        |
|                     | (115.84, | (109.21, | (-0.22, | <0.001 |          |          | (0.15,  | <0.001 | (1220.07 | (597.44, | (-2.64, | <0.001 | (18.58, | (8.02,  | (-3.03, | <0.001 |
|                     | 119.71)  | 112.34)  | -0.21)  |        | ,        | ,        |         |        |          |          |         |        |         |         |         |        |
|                     |          |          |         |        | 1624.21) | 1708.13) | 0.20)   |        | 1232.58) | 604.68)  | -2.21)  |        | 20.16)  | 8.88)   | -2.58)  |        |
|                     |          |          |         |        | 1960.24  | 1860.01  |         |        |          |          |         |        |         |         |         |        |
| Armenia             | 159.30   | 148.66   | -0.23   |        | (1937.37 | (1834.85 | -0.18   |        | 1005.90  | 617.74   | -1.67   |        | 15.33   | 8.63    | -1.98   |        |
|                     | (152.82, | (141.53, | (-0.26, | <0.001 |          |          | (-0.19, | <0.001 | (989.52, | (603.77, | (-2.52, | <0.001 | (13.36, | (7.08,  | (-2.95, | <0.001 |
|                     | 165.99)  | 156.09)  | -0.19)  |        | ,        | ,        |         |        |          |          |         |        |         |         |         |        |
|                     |          |          |         |        | 1983.31) | 1885.46) | -0.17)  |        | 1022.50) | 631.99)  | -0.81)  |        | 17.52)  | 10.49)  | -0.99)  |        |
|                     |          |          |         |        | 748.53   | 771.44   | 0.10    |        |          |          |         |        |         |         |         |        |
| Australia           | 100.17   | 100.32   | -0.01   |        | (742.12, | (765.67, | (0.06,  | <0.001 | 472.51   | 270.93   | -1.91   |        | 7.17    | 3.77    | -2.19   |        |
|                     | (97.83,  | (98.24,  | (-0.08, | 0.818  |          |          | (0.06,  | <0.001 | (467.41, | (267.52, | (-2.27, | <0.001 | (6.55,  | (3.38,  | (-2.62, | <0.001 |
|                     | 102.55)  | 102.44)  | 0.06)   |        | 754.98)  | 777.25)  | 0.14)   |        | 477.64)  | 274.38)  | -1.54)  |        | 7.82)   | 4.20)   | -1.77)  |        |
|                     |          |          |         |        | 846.71   | 803.56   | -0.18   |        |          |          |         |        |         |         |         |        |
| Austria             | 88.75    | 83.62    | -0.20   |        | (836.34, | (793.30, | (-0.25, | <0.001 | 542.28   | 228.59   | -2.95   |        | 8.29    | 2.92    | -3.53   |        |
|                     | (85.43,  | (80.36,  | (-0.24, | <0.001 |          |          | (-0.25, | <0.001 | (533.97, | (223.19, | (-3.41, | <0.001 | (7.29,  | (2.35,  | (-4.16, | <0.001 |
|                     | 92.18)   | 87.00)   | -0.17)  |        | 857.20)  | 813.93)  | -0.10)  |        | 550.70)  | 234.12)  | -2.49)  |        | 9.39)   | 3.62)   | -2.89)  |        |
|                     |          |          |         |        | 1850.11  | 1798.00  |         |        |          |          |         |        |         |         |         |        |
| Azerbaijan          | 160.70   | 151.67   | -0.20   |        | (1834.82 | (1785.34 | -0.10   |        | 1654.59  | 1201.70  | -1.26   |        | 26.62   | 18.58   | -1.23   |        |
|                     | (156.22, | (147.98, | (-0.21, | <0.001 |          |          | (-0.13, | <0.001 | (1639.84 | (1191.49 | -1.98,  | 0.001  | (24.76, | (17.34, | (-2.21, | 0.015  |
|                     | 165.28)  | 155.43)  | -0.18)  |        | ,        | ,        |         |        |          |          |         |        |         |         |         |        |
|                     |          |          |         |        | 1865.51) | 1810.73) | -0.07)  |        | 1669.46) | 1211.99) | -0.54)  |        | 28.59)  | 19.90)  | -0.24)  |        |
|                     |          |          |         |        | 2245.37  | 2232.18  |         |        |          |          |         |        |         |         |         |        |
| Bahamas             | 180.42   | 184.35   | 0.08    |        | (2159.20 | (2157.34 | -0.02   |        | 1370.08  | 1228.72  | -0.52   |        | 21.98   | 19.60   | -0.45   |        |
|                     | (156.61, | (163.29, | (0.06,  | <0.001 |          |          | (-0.04, | 0.197  | (1301.34 | (1173.73 | -0.52   |        | 21.98   | 19.60   | -0.45   |        |
|                     | 207.05)  | 207.43)  | 0.10)   |        | ,        | ,        |         |        |          |          |         |        |         |         |         |        |
|                     |          |          |         |        | 2334.29) | 2309.02) | 0.01)   |        | 1441.64) | 1285.69) | 0.15)   |        | 33.03)  | 28.06)  | 0.42)   |        |
|                     |          |          |         |        | 1064.13  |          |         |        |          |          |         |        |         |         |         |        |
| Bahrain             | 94.24    | 89.92    | -0.15   |        | (1024.95 | 1019.71  | -0.13   |        | 1371.89  |          |         |        |         |         |         |        |
|                     | (82.89,  | (82.67,  | (-0.20, | <0.001 |          |          | (-0.17, | <0.001 | (1326.67 | 540.59   | -3.16   |        | 21.82   | 7.71    | -3.53   |        |
|                     | 106.96)  | 97.76)   | -0.11)  |        | ,        |          |         |        |          |          |         |        |         |         |         |        |
|                     |          |          |         |        | 1104.64) | 1045.19) | -0.08)  |        | 1418.47) | 559.61)  | -2.71)  |        | 28.60)  | 10.34)  | -3.04)  |        |
| Bangladesh          | 133.26   | 133.52   | 0.01    | 0.333  | 1560.03  | 1626.25  | 0.17    | 0.044  | 1573.66  | 1012.46  | -1.38   | <0.001 | 25.20   | 15.55   | -1.54   | <0.001 |

|                                        |                     |                     |                   |        |                           |                           |                   |        |                           |                           |                   |        |                   |                   |                   |        |
|----------------------------------------|---------------------|---------------------|-------------------|--------|---------------------------|---------------------------|-------------------|--------|---------------------------|---------------------------|-------------------|--------|-------------------|-------------------|-------------------|--------|
|                                        | (132.13,<br>134.39) | (132.64,<br>134.39) | (-0.01,<br>0.02)  |        | (1556.10<br>,<br>1563.97) | (1623.20<br>,<br>1629.31) | (0.00,<br>0.33)   |        | (1569.64<br>,<br>1577.68) | (1010.04<br>,<br>1014.89) | (-1.77,<br>-0.99) |        | (24.69,<br>25.72) | (15.25,<br>15.85) | (-1.92,<br>-1.15) |        |
|                                        | 178.63              | 182.30              | 0.07              |        | 2352.64                   | 2375.35                   | 0.03              |        | 919.39                    | 634.17                    | -1.47             |        | 13.77             | 8.79              | -1.75             |        |
| Barbados                               | (154.45,<br>205.59) | (156.78,<br>210.90) | (0.05,<br>0.09)   | <0.001 | (2262.59<br>,<br>2445.42) | (2280.83<br>,<br>2472.89) | (0.02,<br>0.05)   | <0.001 | (863.40,<br>978.11)       | (586.23,<br>685.11)       | (-2.21,<br>-0.73) | <0.001 | (7.71,<br>22.78)  | (4.04,<br>16.87)  | (-2.59,<br>-0.89) | <0.001 |
|                                        | 112.98              | 113.74              | 0.02              |        | 790.47                    | 816.24                    | 0.11              |        | 1257.82                   | 1106.45                   | -0.42             |        | 21.04             | 18.42             | -0.43             |        |
| Belarus                                | (109.76,<br>116.27) | (110.13,<br>117.45) | (0.00,<br>0.05)   | 0.028  | (781.93,<br>799.08)       | (806.62,<br>825.97)       | (0.07,<br>0.16)   | <0.001 | (1247.11<br>,<br>1268.60) | (1095.62<br>,<br>1117.39) | (-1.36,<br>0.54)  | 0.393  | (19.68,<br>22.48) | (17.06,<br>19.88) | (-1.44,<br>0.60)  | 0.411  |
|                                        | 69.94               | 66.78               | -0.16             |        | 758.25                    | 808.94                    | 0.24              |        | 572.47                    | 227.74                    | -3.12             |        | 8.85              | 2.86              | -3.80             |        |
| Belgium                                | (67.33,<br>72.63)   | (64.15,<br>69.48)   | (-0.18,<br>-0.13) | <0.001 | (749.57,<br>767.03)       | (799.72,<br>818.25)       | (0.16,<br>0.32)   | <0.001 | (564.94,<br>580.09)       | (222.90,<br>232.67)       | (-3.55,<br>-2.70) | <0.001 | (7.94,<br>9.85)   | (2.35,<br>3.47)   | (-4.31,<br>-3.29) | <0.001 |
|                                        | 178.47              | 187.32              | 0.17              |        | 2184.57                   | 2339.39                   | 0.24              |        | 786.71                    | 830.00                    | 0.16              |        | 11.49             | 12.21             | 0.10              |        |
| Belize                                 | (147.90,<br>214.09) | (167.53,<br>208.89) | (0.16,<br>0.19)   | <0.001 | (2074.19<br>,<br>2299.84) | (2268.04<br>,<br>2412.48) | (0.21,<br>0.27)   | <0.001 | (719.36,<br>859.14)       | (787.12,<br>874.65)       | (-0.39,<br>0.71)  | 0.564  | (4.65,<br>24.28)  | (7.49,<br>18.86)  | (-0.55,<br>0.75)  | 0.766  |
|                                        | 150.35              | 149.95              | -0.01             |        | 2501.66                   | 2610.15                   | 0.16              |        | 1011.19                   | 906.82                    | -0.38             |        | 14.67             | 12.80             | -0.48             |        |
| Benin                                  | (144.44,<br>156.46) | (146.43,<br>153.54) | (-0.02,<br>-0.00) | 0.001  | (2477.46<br>,<br>2526.05) | (2595.45<br>,<br>2624.91) | (0.09,<br>0.23)   | <0.001 | (995.37,<br>1027.22)      | (897.86,<br>915.87)       | (-0.59,<br>-0.17) | 0.001  | (12.79,<br>16.76) | (11.74,<br>13.94) | (-0.71,<br>-0.24) | <0.001 |
|                                        | 109.35              | 109.49              | 0.02              |        | 1254.32                   | 1219.74                   | -0.10             |        | 766.71                    | 355.82                    | -2.82             |        | 11.94             | 4.89              | -3.30             |        |
| Bermuda                                | (73.66,<br>158.99)  | (67.84,<br>170.19)  | (-0.04,<br>0.07)  | 0.583  | (1122.82<br>,<br>1398.92) | (1066.74<br>,<br>1390.57) | (-0.19,<br>-0.02) | 0.020  | (665.59,<br>880.91)       | (276.28,<br>453.56)       | (-3.14,<br>-2.49) | <0.001 | (2.70,<br>37.84)  | (0.11,<br>33.97)  | (-3.72,<br>-2.87) | <0.001 |
|                                        | 137.18              | 126.76              | -0.27             |        | 1470.61                   | 1444.12                   | -0.04             |        | 1340.89                   | 847.98                    | -1.58             |        | 21.50             | 12.93             | -1.75             |        |
| Bhutan                                 | (122.68,<br>153.09) | (115.24,<br>139.15) | (-0.30,<br>-0.24) | <0.001 | (1421.20<br>,<br>1521.44) | (1404.60<br>,<br>1484.50) | (-0.17,<br>0.09)  | 0.574  | (1292.56<br>,<br>1390.69) | (817.71,<br>879.11)       | (-1.71,<br>-1.44) | <0.001 | (15.71,<br>28.87) | (9.44,<br>17.34)  | (-1.89,<br>-1.60) | <0.001 |
|                                        | 149.83              | 133.43              | -0.40             |        | 1987.20                   | 1966.75                   | -0.03             |        | 1430.32                   | 738.19                    | -2.24             |        | 22.33             | 10.58             | -2.53             |        |
| Bolivia<br>(Plurinational<br>State of) | (144.97,<br>154.83) | (130.19,<br>136.73) | (-0.42,<br>-0.37) | <0.001 | (1969.26<br>,<br>,        | (1954.23<br>,<br>,        | (-0.07,<br>0.01)  | 0.193  | (1414.90<br>,<br>,        | (730.48,<br>745.97)       | (-2.38,<br>-2.09) | <0.001 | (20.43,<br>24.37) | (9.67,<br>11.56)  | (-2.68,<br>-2.37) | <0.001 |

|                        |          |          |         |        |          |          |         |        |          |          |         |        |         |         |         |        |
|------------------------|----------|----------|---------|--------|----------|----------|---------|--------|----------|----------|---------|--------|---------|---------|---------|--------|
|                        |          |          |         |        | 2005.26) | 1979.33) |         |        | 1445.87) |          |         |        |         |         |         |        |
| Bosnia and Herzegovina | 93.30    | 99.40    | 0.22    |        | 949.97   | 1015.98  | 0.24    |        | 867.10   | 574.73   | -1.56   |        | 13.60   | 8.26    | -1.89   |        |
|                        | (89.07,  | (93.57,  | (0.18,  | <0.001 | (936.32, | (997.03, | (0.18,  | <0.001 | (854.09, | (560.63, | (-1.99, | <0.001 | (12.01, | (6.66,  | (-2.38, | <0.001 |
|                        | 97.69)   | 105.53)  | 0.26)   |        | 963.78)  | 1035.23) | 0.31)   |        | 880.26)  | 589.12)  | -1.14)  |        | 15.34)  | 10.16)  | -1.40)  |        |
| Botswana               | 178.60   | 169.19   | -0.19   |        | 2476.60  | 2469.90  | -0.01   |        | 1096.05  | 902.89   | -0.63   |        | 16.24   | 12.99   | -0.73   |        |
|                        | (166.86, | (161.42, | (-0.21, | <0.001 | (2432.18 | (2440.01 | (-0.04, | 0.739  | (1065.37 | (885.01, | (-0.81, | <0.001 | (12.64, | (10.93, | (-0.93, | <0.001 |
|                        | 191.02)  | 177.24)  | -0.17)  |        | ,        | ,        | 0.03)   |        | ,        | 921.05)  | -0.45)  |        | 20.60)  | 15.33)  | -0.53)  |        |
|                        |          |          |         |        | 2521.70) | 2500.08) |         |        | 1127.45) |          |         |        |         |         |         |        |
| Brazil                 | 163.41   | 140.67   | -0.52   |        | 2290.36  | 2216.35  | -0.09   |        | 1511.98  | 780.03   | -2.26   |        | 24.35   | 11.39   | -2.59   |        |
|                        | (162.39, | (139.87, | (-0.56, | <0.001 | (2286.57 | (2213.21 | (-0.15, | <0.001 | (1508.82 | (778.20, | (-2.46, | <0.001 | (23.95, | (11.17, | (-2.84, | <0.001 |
|                        | 164.42)  | 141.46)  | -0.48)  |        | ,        | ,        | -0.04)  |        | ,        | 781.86)  | -2.06)  |        | 24.76)  | 11.61)  | -2.35)  |        |
|                        |          |          |         |        | 2294.17) | 2219.49) |         |        | 1515.15) |          |         |        |         |         |         |        |
| Brunei Darussalam      | 115.78   | 103.87   | -0.37   |        | 815.08   | 785.63   | -0.10   |        | 1503.22  | 768.36   | -2.30   |        | 24.52   | 12.28   | -2.41   |        |
|                        | (97.52,  | (90.58,  | (-0.40, | <0.001 | (765.24, | (748.58, | (-0.33, | 0.385  | (1435.32 | (731.53, | (-2.75, | <0.001 | (16.54, | (8.05,  | (-2.79, | <0.001 |
|                        | 136.56)  | 118.72)  | -0.34)  |        | 867.40)  | 824.19)  | 0.13)   |        | ,        | 806.72)  | -1.85)  |        | 35.13)  | 18.15)  | -2.04)  |        |
|                        |          |          |         |        |          |          |         |        | 1573.59) |          |         |        |         |         |         |        |
| Bulgaria               | 99.22    | 98.45    | -0.03   |        | 1492.20  | 1520.31  | 0.08    |        | 1645.45  | 1215.22  | -1.00   |        | 26.62   | 19.18   | -1.07   |        |
|                        | (95.73,  | (94.27,  | (-0.04, | <0.001 | (1478.39 | (1502.90 | (-0.02, | 0.106  | (1631.20 | (1200.59 | (-1.39, | <0.001 | (24.84, | (17.42, | (-1.51, | <0.001 |
|                        | 102.81)  | 102.78)  | -0.01)  |        | ,        | ,        | 0.17)   |        | ,        | ,        | -0.60)  |        | 28.49)  | 21.11)  | -0.63)  |        |
|                        |          |          |         |        | 1506.10) | 1537.89) |         |        | 1659.79) | 1230.00) |         |        |         |         |         |        |
| Burkina Faso           | 142.99   | 143.19   | 0.01    |        | 2240.02  | 2281.71  | 0.07    |        | 924.49   | 912.84   | -0.01   |        | 13.59   | 13.32   | -0.03   |        |
|                        | (138.74, | (140.61, | (-0.02, | 0.561  | (2223.07 | (2271.35 | (0.03,  | 0.002  | (913.16, | (906.09, | (-0.23, | 0.934  | (12.23, | (12.51, | (-0.30, | 0.830  |
|                        | 147.35)  | 145.81)  | 0.03)   |        | ,        | ,        | 0.12)   |        | 935.93)  | 919.64)  | 0.22)   |        | 15.07)  | 14.18)  | 0.24)   |        |
|                        |          |          |         |        | 2257.08) | 2292.11) |         |        |          |          |         |        |         |         |         |        |
| Burundi                | 211.74   | 190.26   | -0.38   |        | 2980.15  | 3022.03  | 0.05    |        | 1793.21  | 1108.12  | -1.69   |        | 27.49   | 15.83   | -1.93   |        |
|                        | (205.41, | (186.27, | (-0.40, | <0.001 | (2956.21 | (3005.91 | (0.01,  | 0.009  | (1774.16 | (1098.14 | (-1.82, | <0.001 | (25.15, | (14.64, | (-2.08, | <0.001 |
|                        | 218.24)  | 194.31)  | -0.35)  |        | ,        | ,        | 0.09)   |        | ,        | ,        | -1.55)  |        | 30.00)  | 17.09)  | -1.78)  |        |
|                        |          |          |         |        | 3004.26) | 3038.22) |         |        | 1812.42) | 1118.18) |         |        |         |         |         |        |
| Cabo Verde             | 146.44   | 140.61   | -0.14   |        | 3123.01  | 3209.90  | 0.10    |        | 1281.81  | 726.45   | -2.01   |        | 18.83   | 9.01    | -2.59   |        |
|                        | (125.08, | (126.23, | (-0.15, | <0.001 | (3022.99 | (3139.74 | (0.09,  | <0.001 | (1213.79 | (693.32, | (-2.22, | <0.001 | (11.27, | (5.67,  | (-2.88, | <0.001 |
|                        | 170.95)  | 156.22)  | -0.13)  |        | ,        | ,        | 0.11)   |        | ,        | 760.80)  | -1.80)  |        | 30.06)  | 13.64)  | -2.31)  |        |
|                        |          |          |         |        | 3226.00) | 3281.25) |         |        | 1353.05) |          |         |        |         |         |         |        |
| Cambodia               | 124.36   | 112.93   | -0.33   | <0.001 | 1233.23  | 1203.06  | -0.08   | 0.066  | 1493.53  | 887.69   | -1.76   | <0.001 | 24.06   | 13.55   | -1.93   | <0.001 |

|                             |                     |                     |                   |        |                            |                            |                   |        |                            |                            |                   |                   |                   |                   |                   |        |
|-----------------------------|---------------------|---------------------|-------------------|--------|----------------------------|----------------------------|-------------------|--------|----------------------------|----------------------------|-------------------|-------------------|-------------------|-------------------|-------------------|--------|
|                             | (120.71,<br>128.11) | (110.46,<br>115.44) | (-0.34,<br>-0.32) |        | (1221.67,<br>,<br>1244.87) | (1194.99,<br>,<br>1211.18) | (-0.15,<br>0.01)  |        | (1480.49,<br>,<br>1506.67) | (880.72,<br>894.69)        | (-1.90,<br>-1.62) | (22.41,<br>25.80) | (12.70,<br>14.45) | (-2.11,<br>-1.76) |                   |        |
|                             | 143.14              | 151.66              | 0.20              |        | 2279.93                    | 2504.35                    | 0.32              |        | 1036.51                    | 1017.95                    | -0.06             | 15.36             | 14.84             | -0.12             |                   |        |
| Cameroon                    | (139.24,<br>147.13) | (149.43,<br>153.92) | (0.17,<br>0.23)   | <0.001 | (2264.33,<br>,<br>2295.61) | (2495.28,<br>,<br>2513.45) | (0.31,<br>0.34)   | <0.001 | (1025.62,<br>,<br>1047.49) | (1012.00,<br>,<br>1023.94) | (-0.21,<br>0.09)  | 0.418             | (14.04,<br>16.78) | (14.12,<br>15.59) | (-0.23,<br>-0.01) | 0.035  |
|                             | 104.98              | 95.01               | -0.33             |        | 1385.06                    | 1257.90                    | -0.29             |        | 468.32                     | 302.94                     | -1.47             | 6.32              | 3.65              | -1.86             |                   |        |
| Canada                      | (103.13,<br>106.85) | (93.28,<br>96.77)   | (-0.37,<br>-0.29) | <0.001 | (1378.33,<br>,<br>1391.83) | (1251.59,<br>,<br>1264.24) | (-0.52,<br>-0.06) | 0.013  | (464.42,<br>472.25)        | (299.85,<br>306.05)        | (-1.69,<br>-1.26) | <0.001            | (5.88,<br>6.79)   | (3.32,<br>4.01)   | (-2.16,<br>-1.55) | <0.001 |
|                             | 199.71              | 203.71              | 0.07              |        | 2807.79                    | 2870.41                    | 0.09              |        | 1487.24                    | 1344.70                    | -0.34             | 22.74             | 20.32             | -0.38             |                   |        |
| Central African<br>Republic | (191.01,<br>208.73) | (197.52,<br>210.05) | (0.06,<br>0.08)   | <0.001 | (2774.98,<br>,<br>2840.92) | (2847.04,<br>,<br>2893.94) | (0.03,<br>0.14)   | 0.002  | (1462.39,<br>,<br>1512.42) | (1328.13,<br>,<br>1361.44) | (-0.59,<br>-0.09) | 0.008             | (19.71,<br>26.12) | (18.30,<br>22.51) | (-0.66,<br>-0.09) | 0.009  |
|                             | 150.17              | 152.79              | 0.06              |        | 2281.62                    | 2366.05                    | 0.14              |        | 1051.38                    | 1023.39                    | 0.02              | 15.55             | 15.01             | 0.01              |                   |        |
| Chad                        | (144.82,<br>155.68) | (149.47,<br>156.18) | (0.05,<br>0.07)   | <0.001 | (2260.60,<br>,<br>2302.79) | (2352.92,<br>,<br>2379.25) | (0.09,<br>0.18)   | <0.001 | (1036.73,<br>,<br>1066.19) | (1014.43,<br>,<br>1032.42) | (-0.10,<br>0.14)  | 0.712             | (13.79,<br>17.48) | (13.93,<br>16.17) | (-0.13,<br>0.14)  | 0.907  |
|                             | 67.02               | 68.54               | 0.08              |        | 656.41                     | 693.67                     | 0.21              |        | 555.43                     | 370.28                     | -1.38             | 8.52              | 5.34              | -1.60             |                   |        |
| Chile                       | (64.87,<br>69.22)   | (66.61,<br>70.51)   | (0.06,<br>0.10)   | <0.001 | (649.69,<br>663.18)        | (687.50,<br>699.89)        | (0.14,<br>0.27)   | <0.001 | (549.20,<br>561.70)        | (365.79,<br>374.83)        | (-1.79,<br>-0.98) | <0.001            | (7.76,<br>9.33)   | (4.81,<br>5.91)   | (-2.06,<br>-1.13) | <0.001 |
|                             | 109.24              | 96.00               | -0.45             |        | 1241.01                    | 1145.62                    | -0.27             |        | 1140.57                    | 734.19                     | -1.45             | 17.77             | 10.90             | -1.61             |                   |        |
| China                       | (108.96,<br>109.53) | (95.72,<br>96.27)   | (-0.51,<br>-0.40) | <0.001 | (1240.06,<br>,<br>1241.95) | (1144.69,<br>,<br>1146.56) | (-0.31,<br>-0.24) | <0.001 | (1139.65,<br>,<br>1141.49) | (733.45,<br>734.92)        | (-1.73,<br>-1.17) | <0.001            | (17.65,<br>17.88) | (10.81,<br>10.99) | (-1.90,<br>-1.31) | <0.001 |
|                             | 75.98               | 65.69               | -0.49             |        | 887.53                     | 852.55                     | -0.12             |        | 899.89                     | 469.66                     | -2.40             | 14.49             | 7.07              | -2.64             |                   |        |
| Colombia                    | (74.49,<br>77.49)   | (64.55,<br>66.85)   | (-0.53,<br>-0.45) | <0.001 | (882.47,<br>892.61)        | (848.41,<br>856.70)        | (-0.24,<br>-0.00) | 0.043  | (894.74,<br>905.06)        | (466.60,<br>472.74)        | (-2.59,<br>-2.21) | <0.001            | (13.84,<br>15.17) | (6.70,<br>7.46)   | (-2.85,<br>-2.42) | <0.001 |
|                             | 197.00              | 179.14              | -0.33             |        | 3096.46                    | 3083.25                    | -0.01             |        | 1219.67                    | 930.77                     | -0.90             | 17.58             | 12.76             | -1.14             |                   |        |
| Comoros                     | (175.75,<br>220.36) | (164.17,<br>195.16) | (-0.35,<br>-0.31) | <0.001 | (3009.95,<br>,<br>3185.06) | (3019.79,<br>,<br>3147.75) | (-0.03,<br>0.00)  | 0.113  | (1163.49,<br>,<br>1278.05) | (895.51,<br>967.09)        | (-2.91,<br>1.15)  | 0.387             | (11.33,<br>26.25) | (8.91,<br>17.76)  | (-3.55,<br>1.33)  | 0.362  |

|                                             |          |          |         |        |          |          |         |        |          |          |         |        |         |         |         |        |
|---------------------------------------------|----------|----------|---------|--------|----------|----------|---------|--------|----------|----------|---------|--------|---------|---------|---------|--------|
| Congo                                       | 199.71   | 177.58   | -0.41   |        | 2976.49  | 2941.85  | -0.04   |        | 1602.19  | 955.56   | -1.82   |        | 24.69   | 13.56   | -2.10   |        |
|                                             | (190.46, | (171.93, | (-0.42, | <0.001 | (2940.63 | (2918.67 | (-0.10, | 0.257  | (1574.57 | (942.26, | (-2.58, | <0.001 | (21.31, | (12.01, | (-2.95, | <0.001 |
|                                             | 209.33)  | 183.38)  | -0.39)  |        | ,        | ,        | 0.03)   |        | ,        | 969.01)  | -1.05)  |        | 28.47)  | 15.25)  | -1.25)  |        |
| Cook Islands                                | 105.69   | 106.62   | 0.03    |        | 1085.17  | 1109.39  | 0.09    |        | 1879.21  | 1354.84  | -1.11   |        | 30.61   | 21.50   | -1.20   |        |
|                                             | (44.21,  | (39.73,  | (-0.01, | 0.088  | (858.28, | (854.92, | (0.02,  | 0.009  | (1572.03 | (1070.57 | (-1.27, | <0.001 | (4.06,  | (0.98,  | (-1.39, | <0.001 |
|                                             | 216.80)  | 231.29)  | 0.07)   |        | 1356.85) | 1416.87) | 0.15)   |        | ,        | ,        | -0.95)  |        | 111.82) | 105.76) | -1.02)  |        |
| Costa Rica                                  | 135.07   | 133.24   | -0.04   |        | 2223.52  | 2244.48  | 0.04    |        | 730.55   | 560.57   | -0.73   |        | 10.53   | 7.51    | -0.92   |        |
|                                             | (128.73, | (128.11, | (-0.06, | <0.001 | (2197.50 | (2223.38 | (0.02,  | <0.001 | (715.38, | (550.13, | (-1.16, | 0.001  | (8.76,  | (6.35,  | (-1.47, | 0.001  |
|                                             | 141.66)  | 138.53)  | -0.02)  |        | ,        | ,        | 0.06)   |        | 745.97)  | 571.17)  | -0.29)  |        | 12.56)  | 8.84)   | -0.36)  |        |
| Cote d'Ivoire                               | 164.24   | 160.58   | -0.08   |        | 2529.48  | 2569.30  | 0.06    |        | 1218.28  | 995.04   | -0.67   |        | 18.12   | 14.31   | -0.79   |        |
|                                             | (160.48, | (158.17, | (-0.09, | <0.001 | (2514.78 | (2559.67 | (0.03,  | 0.001  | (1207.75 | (988.96, | (-0.92, | <0.001 | (16.84, | (13.58, | (-0.98, | <0.001 |
|                                             | 168.07)  | 163.01)  | -0.06)  |        | ,        | ,        | 0.10)   |        | ,        | 1001.15) | -0.43)  |        | 19.48)  | 15.07)  | -0.60)  |        |
| Croatia                                     | 87.49    | 87.39    | 0.00    |        | 858.04   | 846.30   | -0.03   |        | 819.22   | 339.72   | -2.92   |        | 13.05   | 4.69    | -3.63   |        |
|                                             | (83.34,  | (82.51,  | (-0.06, | 0.991  | (844.99, | (831.08, | (-0.19, | 0.750  | (806.57, | (330.19, | (-3.76, | <0.001 | (11.51, | (3.65,  | (-4.40, | <0.001 |
|                                             | 91.81)   | 92.52)   | 0.06)   |        | 871.25)  | 861.76)  | 0.14)   |        | 832.03)  | 349.50)  | -2.08)  |        | 14.76)  | 5.99)   | -2.85)  |        |
| Cuba                                        | 172.37   | 167.95   | -0.09   |        | 2123.74  | 2074.17  | -0.08   |        | 971.69   | 523.58   | -2.09   |        | 15.07   | 7.25    | -2.48   |        |
|                                             | (168.61, | (163.76, | (-0.12, | <0.001 | (2110.43 | (2059.43 | (-0.10, | <0.001 | (962.46, | (516.25, | (-2.49, | <0.001 | (13.93, | (6.41,  | (-2.94, | <0.001 |
|                                             | 176.21)  | 172.21)  | -0.06)  |        | ,        | ,        | -0.05)  |        | 980.98)  | 530.99)  | -1.70)  |        | 16.28)  | 8.17)   | -2.01)  |        |
| Cyprus                                      | 56.79    | 56.17    | -0.04   |        | 574.05   | 629.76   | 0.40    |        | 546.98   | 333.46   | -1.70   |        | 8.67    | 4.87    | -1.87   |        |
|                                             | (48.73,  | (49.92,  | (-0.05, | <0.001 | (547.77, | (608.58, | (0.11,  | 0.006  | (521.27, | (318.31, | (-2.33, | <0.001 | (5.71,  | (3.23,  | (-2.41, | <0.001 |
|                                             | 65.85)   | 63.15)   | -0.02)  |        | 601.30)  | 651.64)  | 0.69)   |        | 573.66)  | 349.30)  | -1.07)  |        | 12.67)  | 7.30)   | -1.33)  |        |
| Czechia                                     | 106.44   | 106.52   | 0.01    |        | 1379.96  | 1352.64  | -0.06   |        | 848.22   | 361.15   | -2.94   |        | 13.02   | 4.47    | -3.66   |        |
|                                             | (103.18, | (103.01, | (-0.00, | 0.111  | (1368.11 | (1339.85 | (-0.10, | 0.003  | (839.11, | (354.71, | (-3.29, | <0.001 | (11.93, | (3.80,  | (-4.08, | <0.001 |
|                                             | 109.78)  | 110.15)  | 0.03)   |        | ,        | ,        | -0.02)  |        | 857.41)  | 367.69)  | -2.58)  |        | 14.20)  | 5.25)   | -3.24)  |        |
| Democratic<br>People's Republic<br>of Korea | 116.44   | 119.00   | 0.08    |        | 1222.42  | 1236.52  | 0.05    |        | 1369.00  | 1331.85  | -0.08   |        | 21.66   | 20.94   | -0.12   |        |
|                                             | (114.07, | (116.89, | (0.06,  | <0.001 | (1214.73 | (1229.71 | (0.01,  | 0.013  | (1360.78 | (1324.83 | (-0.17, | 0.058  | (20.63, | (20.07, | (-0.18, | <0.001 |
|                                             | 118.84)  | 121.14)  | 0.09)   |        | ,        | ,        | 0.10)   |        | ,        | ,        | 0.00)   |        | 22.73)  | 21.84)  | -0.07)  |        |



|                   |          |          |         |        |          |          |         |        |          |          |         |        |         |         |         |        |
|-------------------|----------|----------|---------|--------|----------|----------|---------|--------|----------|----------|---------|--------|---------|---------|---------|--------|
|                   |          |          |         |        | 1230.16) | 1243.35) |         |        | 1377.25) | 1338.90) |         |        |         |         |         |        |
| Democratic        | 178.03   | 175.17   | -0.06   |        | 2802.80  | 2804.80  | 0.01    |        | 1130.76  | 899.14   | -0.82   |        | 16.70   | 12.76   | -0.95   |        |
| Republic of the   | (175.80, | (173.76, | (-0.07, | <0.001 | (2793.90 | (2799.14 | (-0.05, | 0.749  | (1124.88 | (895.81, | (-0.87, | <0.001 | (15.98, | (12.36, | (-1.01, | <0.001 |
| Congo             | 180.28)  | 176.58)  | -0.04)  |        | ,        | ,        | 0.06)   |        | ,        | 902.49)  | -0.77)  |        | 17.44)  | 13.17)  | -0.90)  |        |
|                   |          |          |         |        | 2811.72) | 2810.48) |         |        | 1136.66) |          |         |        |         |         |         |        |
|                   | 84.15    | 71.07    | -0.58   |        | 867.03   | 776.04   | -0.38   |        | 472.16   | 185.45   | -3.23   |        | 7.19    | 2.21    | -4.09   |        |
| Denmark           | (80.13,  | (67.26,  | (-0.60, | <0.001 | (853.98, | (763.29, | (-0.45, | <0.001 | (462.62, | (179.27, | (-3.64, | <0.001 | (6.06,  | (1.59,  | (-4.67, | <0.001 |
|                   | 88.33)   | 75.05)   | -0.56)  |        | 880.23)  | 788.95)  | -0.30)  |        | 481.86)  | 191.81)  | -2.83)  |        | 8.48)   | 3.02)   | -3.50)  |        |
|                   |          |          |         |        | 2851.37  | 3038.05  | 0.22    |        | 1105.19  | 909.89   | -0.63   |        | 15.98   | 12.42   | -0.82   |        |
| Djibouti          | (158.04, | (161.85, | (-0.08, | <0.001 | (2775.01 | (2990.18 | (0.18,  | <0.001 | (1056.05 | (883.93, | (-1.02, | 0.001  | (10.49, | (9.56,  | (-1.27, | <0.001 |
|                   | 196.76)  | 185.08)  | -0.06)  |        | ,        | ,        | 0.27)   |        | ,        | 936.44)  | -0.25)  |        | 23.48)  | 15.88)  | -0.38)  |        |
|                   |          |          |         |        | 2929.47) | 3086.50) |         |        | 1156.16) |          |         |        |         |         |         |        |
|                   | 183.37   | 184.06   | 0.01    |        | 2234.13  | 2251.95  | 0.03    |        | 1223.23  | 938.91   | -0.93   |        | 19.16   | 14.20   | -1.02   |        |
| Dominica          | (136.15, | (135.43, | (0.00,  | 0.041  | (2059.82 | (2072.28 | (0.01,  | 0.002  | (1092.23 | (824.09, | (-1.11, | <0.001 | (6.09,  | (3.56,  | (-1.24, | <0.001 |
|                   | 242.75)  | 244.60)  | 0.03)   |        | ,        | ,        | 0.05)   |        | ,        | 1065.32) | -0.75)  |        | 46.31)  | 38.06)  | -0.79)  |        |
|                   |          |          |         |        | 2420.11) | 2443.11) |         |        | 1366.30) |          |         |        |         |         |         |        |
|                   | 175.34   | 184.22   | 0.17    |        | 2151.18  | 2219.88  | 0.11    |        | 1358.46  | 1390.07  | 0.13    |        | 21.46   | 22.20   | 0.17    |        |
| Dominican         | (170.51, | (180.26, | (0.16,  | <0.001 | (2134.19 | (2206.08 | (0.08,  | <0.001 | (1344.63 | (1379.10 | (-0.13, | 0.321  | (19.73, | (20.83, | (-0.12, | 0.244  |
| Republic          | 180.27)  | 188.25)  | 0.19)   |        | ,        | ,        | 0.15)   |        | ,        | ,        | 0.39)   |        | 23.31)  | 23.64)  | 0.45)   |        |
|                   |          |          |         |        | 2168.27) | 2233.74) |         |        | 1372.42) | 1401.11) |         |        |         |         |         |        |
|                   | 134.80   | 127.93   | -0.18   |        | 1946.63  | 1942.75  | 0.00    |        | 1278.35  | 871.36   | -1.38   |        | 19.81   | 12.87   | -1.55   |        |
| Ecuador           | (131.22, | (125.33, | (-0.19, | <0.001 | (1932.83 | (1932.53 | (-0.02, | 0.913  | (1267.01 | (864.49, | (-1.90, | <0.001 | (18.41, | (12.04, | (-2.10, | <0.001 |
|                   | 138.46)  | 130.58)  | -0.18)  |        | ,        | ,        | 0.03)   |        | ,        | 878.27)  | -0.86)  |        | 21.29)  | 13.74)  | -1.00)  |        |
|                   |          |          |         |        | 1960.51) | 1953.01) |         |        | 1289.77) |          |         |        |         |         |         |        |
|                   | 140.48   | 143.19   | 0.07    |        | 2305.26  | 2461.74  | 0.25    |        | 3112.53  | 2037.27  | -1.43   |        | 49.91   | 31.50   | -1.56   |        |
| Egypt             | (138.87, | (142.03, | (0.05,  | <0.001 | (2298.77 | (2456.93 | (0.18,  | <0.001 | (3104.93 | (2032.89 | (-1.82, | <0.001 | (48.94, | (30.96, | (-1.99, | <0.001 |
|                   | 142.11)  | 144.36)  | 0.09)   |        | ,        | ,        | 0.32)   |        | ,        | ,        | -1.03)  |        | 50.89)  | 32.06)  | -1.12)  |        |
|                   |          |          |         |        | 2311.76) | 2466.56) |         |        | 3120.15) | 2041.66) |         |        |         |         |         |        |
|                   | 141.60   | 135.45   | -0.16   |        | 1995.56  | 2074.36  | 0.14    |        | 1577.47  | 695.36   | -2.73   |        | 24.77   | 9.96    | -3.02   |        |
| El Salvador       | (136.39, | (130.95, | (-0.19, | <0.001 | (1975.72 | (2056.59 | (0.09,  | <0.001 | (1559.49 | (684.91, | (-3.38, | <0.001 | (22.54, | (8.74,  | (-3.75, | <0.001 |
|                   | 146.96)  | 140.06)  | -0.12)  |        | ,        | ,        | 0.20)   |        | ,        | 705.92)  | -2.07)  |        | 27.18)  | 11.31)  | -2.28)  |        |
|                   |          |          |         |        | 2015.57) | 2092.26) |         |        | 1595.61) |          |         |        |         |         |         |        |
| Equatorial Guinea | 195.05   | 152.37   | -0.86   | <0.001 | 2910.66  | 2773.79  | -0.17   | <0.001 | 1428.82  | 647.25   | -2.66   | <0.001 | 21.63   | 8.28    | -3.21   | <0.001 |

|          |                     |                     |                   |        |                           |                           |                   |        |                           |                           |                   |                   |                   |                   |                   |        |
|----------|---------------------|---------------------|-------------------|--------|---------------------------|---------------------------|-------------------|--------|---------------------------|---------------------------|-------------------|-------------------|-------------------|-------------------|-------------------|--------|
|          | (172.88,<br>219.45) | (142.78,<br>162.52) | (-0.90,<br>-0.81) |        | (2823.00<br>,<br>3000.51) | (2732.10<br>,<br>2816.02) | (-0.19,<br>-0.14) |        | (1365.93<br>,<br>1493.97) | (626.37,<br>668.71)       | (-2.95,<br>-2.36) | (14.46,<br>31.25) | (6.02,<br>11.16)  | (-3.57,<br>-2.85) |                   |        |
|          | 217.15              | 197.54              | -0.33             |        | 3189.94                   | 3205.53                   | 0.02              |        | 1466.28                   | 1185.93                   | -0.73             | 22.03             | 17.28             | -0.81             |                   |        |
| Eritrea  | (208.57,<br>226.03) | (192.41,<br>202.79) | (-0.38,<br>-0.28) | <0.001 | (3156.51<br>,<br>3223.66) | (3184.49<br>,<br>3226.68) | (-0.05,<br>0.09)  | 0.520  | (1442.75<br>,<br>1490.11) | (1172.71<br>,<br>1199.27) | (-1.14,<br>-0.33) | <0.001            | (19.19,<br>25.20) | (15.69,<br>18.98) | (-1.31,<br>-0.31) | 0.001  |
|          | 130.58              | 130.27              | 0.01              |        | 942.37                    | 971.64                    | 0.11              |        | 1117.64                   | 428.86                    | -3.19             | 18.51             | 6.21              | -3.60             |                   |        |
| Estonia  | (121.57,<br>140.13) | (119.76,<br>141.61) | (-0.04,<br>0.06)  | 0.742  | (917.83,<br>967.44)       | (942.40,<br>1001.68)      | (0.07,<br>0.14)   | <0.001 | (1091.20<br>,<br>1144.59) | (409.98,<br>448.54)       | (-3.90,<br>-2.48) | <0.001            | (15.26,<br>22.29) | (4.16,<br>9.13)   | (-4.46,<br>-2.73) | <0.001 |
|          | 172.55              | 176.40              | 0.08              |        | 2397.06                   | 2418.30                   | 0.03              |        | 917.24                    | 974.25                    | 0.12              | 13.21             | 14.29             | 0.17              |                   |        |
| Eswatini | (157.48,<br>188.82) | (164.90,<br>188.53) | (0.05,<br>0.11)   | <0.001 | (2339.51<br>,<br>2455.80) | (2375.14<br>,<br>2462.08) | (0.01,<br>0.05)   | 0.003  | (880.28,<br>955.46)       | (946.33,<br>1002.81)      | (-0.42,<br>0.65)  | 0.673             | (9.04,<br>18.75)  | (11.06,<br>18.20) | (-0.43,<br>0.77)  | 0.579  |
|          | 175.27              | 164.85              | -0.21             |        | 2498.85                   | 2725.29                   | 0.31              |        | 1537.91                   | 730.84                    | -2.53             | 23.76             | 9.66              | -3.06             |                   |        |
| Ethiopia | (173.33,<br>177.23) | (163.64,<br>166.07) | (-0.22,<br>-0.20) | <0.001 | (2491.45<br>,<br>2506.27) | (2720.29<br>,<br>2730.30) | (0.27,<br>0.35)   | <0.001 | (1531.93<br>,<br>1543.91) | (728.17,<br>733.51)       | (-2.63,<br>-2.44) | <0.001            | (23.01,<br>24.52) | (9.35,<br>9.98)   | (-3.19,<br>-2.94) | <0.001 |
|          | 128.90              | 132.24              | 0.09              |        | 1515.87                   | 1731.69                   | 0.48              |        | 2963.01                   | 2293.82                   | -0.83             | 48.78             | 37.01             | -0.92             |                   |        |
| Fiji     | (116.53,<br>142.28) | (120.64,<br>144.66) | (0.05,<br>0.13)   | <0.001 | (1472.78<br>,<br>1559.95) | (1688.98<br>,<br>1775.22) | (0.42,<br>0.54)   | <0.001 | (2901.98<br>,<br>3025.04) | (2244.81<br>,<br>2343.65) | (-1.05,<br>-0.62) | <0.001            | (41.18,<br>57.41) | (31.02,<br>43.82) | (-1.49,<br>-0.35) | 0.002  |
|          | 91.05               | 82.75               | -0.32             |        | 843.64                    | 790.04                    | -0.19             |        | 714.10                    | 291.61                    | -3.07             | 11.48             | 4.01              | -3.61             |                   |        |
| Finland  | (86.83,<br>95.44)   | (78.54,<br>87.14)   | (-0.36,<br>-0.28) | <0.001 | (830.62,<br>856.84)       | (776.89,<br>803.36)       | (-0.32,<br>-0.07) | 0.003  | (702.42,<br>725.95)       | (283.74,<br>299.65)       | (-3.55,<br>-2.59) | <0.001            | (10.06,<br>13.08) | (3.14,<br>5.06)   | (-4.12,<br>-3.10) | <0.001 |
|          | 67.79               | 63.80               | -0.20             |        | 792.67                    | 746.76                    | -0.20             |        | 461.69                    | 241.42                    | -2.27             | 6.95              | 3.18              | -2.74             |                   |        |
| France   | (66.72,<br>68.88)   | (62.71,<br>64.91)   | (-0.22,<br>-0.19) | <0.001 | (788.99,<br>796.36)       | (743.01,<br>750.53)       | (-0.29,<br>-0.12) | <0.001 | (458.90,<br>464.49)       | (239.31,<br>243.55)       | (-2.62,<br>-1.92) | <0.001            | (6.61,<br>7.30)   | (2.95,<br>3.44)   | (-3.20,<br>-2.28) | <0.001 |
|          | 162.50              | 156.48              | -0.12             |        | 2757.34                   | 2807.27                   | 0.07              |        | 1159.45                   | 778.65                    | -1.41             | 17.22             | 10.54             | -1.81             |                   |        |
| Gabon    | (149.71,<br>176.15) | (147.57,<br>165.82) | (-0.14,<br>-0.11) | <0.001 | (2703.93<br>,<br>2811.61) | (2769.06<br>,<br>2845.90) | (0.05,<br>0.09)   | <0.001 | (1123.67<br>,<br>1196.12) | (758.21,<br>799.52)       | (-1.59,<br>-1.22) | <0.001            | (13.06,<br>22.34) | (8.26,<br>13.27)  | (-2.00,<br>-1.63) | <0.001 |

|           |          |          |         |        |          |          |         |        |          |          |         |        |         |         |         |        |
|-----------|----------|----------|---------|--------|----------|----------|---------|--------|----------|----------|---------|--------|---------|---------|---------|--------|
|           | 156.27   | 162.58   | 0.14    |        | 2606.12  | 2742.28  | 0.18    |        | 974.37   | 992.97   | 0.14    |        | 13.88   | 14.10   | 0.14    |        |
| Gambia    | (143.47, | (154.30, | (0.13,  | <0.001 | (2553.26 | (2708.05 | (0.14,  | <0.001 | (941.02, | (971.77, | (-0.81, | 0.770  | (10.09, | (11.64, | (-0.98, | 0.802  |
|           | 170.02)  | 171.22)  | 0.14)   |        | ,        | ,        | 0.23)   |        | 1008.70) | 1014.54) | 1.11)   |        | 18.71)  | 16.95)  | 1.29)   |        |
|           |          |          |         |        | 2659.91) | 2776.86) |         |        |          |          |         |        |         |         |         |        |
|           | 168.74   | 164.93   | -0.07   |        | 2066.62  | 2104.22  | 0.06    |        | 2101.38  | 1328.99  | -1.62   |        | 34.11   | 20.77   | -1.70   |        |
| Georgia   | (163.27, | (157.72, | (-0.14, | 0.046  | (2047.38 | (2078.26 | (0.03,  | <0.001 | (2082.08 | (1309.01 | (-2.85, | 0.011  | (31.70, | (18.37, | (-3.29, | 0.038  |
|           | 174.34)  | 172.41)  | -0.00)  |        | ,        | ,        | 0.09)   |        | ,        | ,        | -0.37)  |        | 36.67)  | 23.45)  | -0.09)  |        |
|           |          |          |         |        | 2085.99) | 2130.46) |         |        | 2120.83) | 1349.22) |         |        |         |         |         |        |
|           | 85.10    | 75.64    | -0.41   |        | 941.61   | 839.29   | -0.39   |        | 729.70   | 292.01   | -3.14   |        | 11.48   | 3.97    | -3.63   |        |
| Germany   | (84.08,  | (74.61,  | (-0.46, | <0.001 | (938.16, | (835.80, | (-0.51, | <0.001 | (726.68, | (289.97, | (-3.33, | <0.001 | (11.11, | (3.74,  | (-3.86, | <0.001 |
|           | 86.14)   | 76.69)   | -0.36)  |        | 945.08)  | 842.79)  | -0.26)  |        | 732.74)  | 294.05)  | -2.94)  |        | 11.87)  | 4.21)   | -3.40)  |        |
|           |          |          |         |        | 2566.33  | 2609.97  | 0.06    |        | 1259.91  | 1032.70  | -0.70   |        | 18.96   | 14.96   | -0.83   |        |
| Ghana     | (155.42, | (154.71, | (-0.06, | 0.001  | (2552.97 | (2601.31 | (0.05,  | <0.001 | (1250.24 | (1027.14 | (-0.92, | <0.001 | (17.77, | (14.29, | (-1.08, | <0.001 |
|           | 162.14)  | 158.98)  | -0.02)  |        | ,        | ,        | 0.07)   |        | ,        | ,        | -0.48)  |        | 20.20)  | 15.66)  | -0.58)  |        |
|           |          |          |         |        | 2579.75) | 2618.65) |         |        | 1269.65) | 1038.28) |         |        |         |         |         |        |
|           | 69.31    | 65.55    | -0.19   |        | 582.44   | 576.34   | 0.00    |        | 686.36   | 484.40   | -1.25   |        | 10.95   | 7.64    | -1.30   |        |
| Greece    | (66.68,  | (62.70,  | (-0.20, | <0.001 | (574.79, | (567.87, | (-0.21, | 0.999  | (678.07, | (476.81, | (-1.54, | <0.001 | (9.93,  | (6.72,  | (-1.65, | <0.001 |
|           | 72.01)   | 68.51)   | -0.18)  |        | 590.16)  | 584.92)  | 0.21)   |        | 694.74)  | 492.08)  | -0.95)  |        | 12.06)  | 8.65)   | -0.96)  |        |
|           |          |          |         |        | 1259.37  | 1123.03  | -0.36   |        | 1020.05  | 503.21   | -2.39   |        | 16.41   | 7.37    | -2.72   |        |
| Greenland | (84.72,  | (64.72,  | (-0.63, | <0.001 | (1127.56 | (984.31, | (-0.58, | 0.002  | (901.30, | (412.12, | (-2.62, | <0.001 | (4.73,  | (0.58,  | (-2.90, | <0.001 |
|           | 176.92)  | 159.20)  | -0.56)  |        | ,        | 1277.37) | -0.13)  |        | 1152.59) | 610.14)  | -2.16)  |        | 45.65)  | 34.49)  | -2.55)  |        |
|           |          |          |         |        | 1404.85) |          |         |        |          |          |         |        |         |         |         |        |
|           | 194.45   | 191.73   | -0.05   |        | 2345.11  | 2339.37  | -0.01   |        | 1634.78  | 861.95   | -2.15   |        | 26.52   | 12.90   | -2.41   |        |
| Grenada   | (148.90, | (151.06, | (-0.07, | <0.001 | (2179.08 | (2191.17 | (-0.05, | 0.811  | (1493.15 | (771.54, | (-2.46, | <0.001 | (11.31, | (4.11,  | (-3.09, | <0.001 |
|           | 250.37)  | 240.47)  | -0.03)  |        | ,        | ,        | 0.04)   |        | ,        | 960.40)  | -1.84)  |        | 53.41)  | 30.96)  | -1.73)  |        |
|           |          |          |         |        | 2521.13) | 2495.38) |         |        | 1786.75) |          |         |        |         |         |         |        |
|           | 118.34   | 137.07   | 0.51    |        | 1598.67  | 1753.35  | 0.34    |        | 1255.28  | 1805.36  | 1.23    |        | 19.02   | 28.93   | 1.42    |        |
| Guam      | (92.90,  | (108.83, | (0.46,  | <0.001 | (1500.95 | (1648.22 | (0.24,  | <0.001 | (1168.63 | (1697.45 | (0.88,  | <0.001 | (9.74,  | (16.73, | (1.03,  | <0.001 |
|           | 148.80)  | 170.55)  | 0.57)   |        | ,        | ,        | 0.43)   |        | ,        | ,        | 1.58)   |        | 33.66)  | 46.68)  | 1.81)   |        |
|           |          |          |         |        | 1701.27) | 1863.55) |         |        | 1346.82) | 1918.42) |         |        |         |         |         |        |
|           | 159.19   | 142.48   | -0.38   |        | 2051.78  | 2164.30  | 0.19    |        | 1724.67  | 892.72   | -2.29   |        | 27.31   | 13.20   | -2.53   |        |
| Guatemala | (154.54, | (139.84, | (-0.43, | <0.001 | (2034.91 | (2153.91 | (0.17,  | <0.001 | (1708.91 | (885.94, | (-3.01, | <0.001 | (25.34, | (12.38, | (-3.32, | <0.001 |
|           | 163.96)  | 145.17)  | -0.32)  |        | ,        | ,        | 0.21)   |        | ,        | 899.54)  | -1.57)  |        | 29.40)  | 14.06)  | -1.74)  |        |

|               |          |          |         |        |          |          |         |        |          |          |         |        |         |         |         |        |
|---------------|----------|----------|---------|--------|----------|----------|---------|--------|----------|----------|---------|--------|---------|---------|---------|--------|
|               |          |          |         |        | 2068.77) | 2174.73) |         |        | 1740.54) |          |         |        |         |         |         |        |
|               |          |          |         |        | 2019.54  | 2314.15  |         |        | 1090.90  | 1114.60  |         |        |         |         |         |        |
|               | 130.82   | 143.87   | 0.32    |        |          |          | 0.47    |        |          |          | 0.10    | 16.43  | 16.61   | 0.07    |         |        |
| Guinea        | (125.93, | (140.39, | (0.28,  | <0.001 | (2000.30 | (2300.26 | (0.44,  | <0.001 | (1076.48 | (1104.66 | (-0.12, | 0.362  | (14.69, | (15.40, | (-0.17, | 0.558  |
|               | 135.85)  | 147.41)  | 0.36)   |        | ,        | ,        | 0.49)   |        | ,        | ,        | 0.33)   |        | 18.33)  | 17.90)  | 0.32)   |        |
|               |          |          |         |        | 2038.92) | 2328.11) |         |        | 1105.48) | 1124.61) |         |        |         |         |         |        |
|               |          |          |         |        | 2164.00  | 2266.46  |         |        | 1692.48  | 1472.44  |         |        |         |         |         |        |
| Guinea-Bissau | 175.69   | 178.93   | 0.05    |        | (2115.36 | (2232.85 | 0.17    |        | (1648.32 | (1444.60 | -0.47   |        | 26.66   | 22.95   | -0.51   |        |
|               | (162.01, | (169.56, | (0.00,  | 0.036  | ,        | ,        | (0.14,  | <0.001 | (1648.32 | (1444.60 | (-0.58, | <0.001 | (21.32, | (19.56, | (-0.66, | <0.001 |
|               | 190.29)  | 188.71)  | 0.10)   |        | ,        | ,        | 0.20)   |        | ,        | ,        | -0.35)  |        | 33.00)  | 26.79)  | -0.36)  |        |
|               |          |          |         |        | 2213.55) | 2300.49) |         |        | 1737.59) | 1500.70) |         |        |         |         |         |        |
|               |          |          |         |        | 2296.77  | 2248.75  |         |        | 2262.36  | 1738.53  |         |        |         |         |         |        |
| Guyana        | 218.26   | 208.51   | -0.16   |        | (2244.48 | (2196.18 | -0.06   |        | (2209.16 | (1691.41 | -0.96   |        | 37.17   | 28.29   | -1.00   |        |
|               | (202.36, | (192.73, | (-0.18, | <0.001 | ,        | ,        | (-0.14, | 0.123  | ,        | ,        | (-1.68, | 0.010  | (30.57, | (22.52, | (-1.77, | 0.012  |
|               | 235.16)  | 225.30)  | -0.13)  |        | ,        | ,        | 0.02)   |        | ,        | ,        | -0.23)  |        | 44.83)  | 35.12)  | -0.22)  |        |
|               |          |          |         |        | 2350.04) | 2302.31) |         |        | 2316.58) | 1786.68) |         |        |         |         |         |        |
|               |          |          |         |        | 2215.46  | 2212.31  |         |        | 2748.50  | 1784.54  |         |        |         |         |         |        |
| Haiti         | 229.73   | 220.55   | -0.14   |        | (2196.34 | (2199.61 | 0.01    |        | (2726.88 | (1773.05 | -1.44   |        | 45.59   | 28.97   | -1.52   |        |
|               | (223.61, | (216.55, | (-0.17, | <0.001 | ,        | ,        | (-0.07, | 0.848  | ,        | ,        | (-1.59, | <0.001 | (42.83, | (27.52, | (-1.67, | <0.001 |
|               | 235.98)  | 224.60)  | -0.12)  |        | ,        | ,        | 0.08)   |        | ,        | ,        | -1.29)  |        | 48.49)  | 30.48)  | -1.36)  |        |
|               |          |          |         |        | 2234.72) | 2225.08) |         |        | 2770.25) | 1796.08) |         |        |         |         |         |        |
|               |          |          |         |        | 1978.57  | 2043.25  |         |        | 1429.66  | 678.14   |         |        |         |         |         |        |
| Honduras      | 148.50   | 142.73   | -0.14   |        | (1956.92 | (2029.36 | 0.12    |        | (1410.68 | 678.14   | -2.50   |        | 22.79   | 9.83    | -2.83   |        |
|               | (142.66, | (139.10, | (-0.17, | <0.001 | ,        | ,        | (0.07,  | <0.001 | (669.94, | (-3.12,  | <0.001  |        | (20.42, | (8.85,  | (-3.50, | <0.001 |
|               | 154.53)  | 146.43)  | -0.11)  |        | ,        | ,        | 0.16)   |        | ,        | 686.43)  | -1.87)  |        | 25.36)  | 10.89)  | -2.15)  |        |
|               |          |          |         |        | 2000.43) | 2057.21) |         |        | 1448.83) |          |         |        |         |         |         |        |
|               |          |          |         |        | 1096.80  | 1030.74  |         |        | 1607.13  | 532.84   |         |        |         |         |         |        |
| Hungary       | 115.53   | 102.49   | -0.42   |        | (1086.36 | (1019.29 | -0.21   |        | (1594.83 | 532.84   | -3.74   |        | 26.97   | 7.82    | -4.19   |        |
|               | (112.17, | (98.91,  | (-0.44, | <0.001 | ,        | ,        | (-0.25, | <0.001 | (524.80, | (-4.21,  | <0.001  |        | (25.42, | (6.88,  | (-4.74, | <0.001 |
|               | 118.97)  | 106.18)  | -0.40)  |        | ,        | ,        | -0.17)  |        | ,        | 541.00)  | -3.27)  |        | 28.61)  | 8.86)   | -3.65)  |        |
|               |          |          |         |        | 1107.33) | 1042.30) |         |        | 1619.50) |          |         |        |         |         |         |        |
|               |          |          |         |        | 625.08   | 619.19   |         |        | 487.80   | 222.76   |         |        |         |         |         |        |
| Iceland       | 75.93    | 71.68    | -0.19   |        | (578.18, | (576.15, | -0.01   |        | (446.43, | (197.35, | -2.68   |        | 7.49    | 3.00    | -3.15   |        |
|               | (60.19,  | (57.56,  | (-0.28, | <0.001 | 674.86)  | 664.82)  | 0.10)   |        | 532.06)  | 250.78)  | -2.44)  |        | (3.21,  | (0.78,  | (-3.50, | <0.001 |
|               | 94.63)   | 88.48)   | -0.10)  |        | 1594.88  | 1609.96  |         |        | 1695.85  | 1279.87  |         |        | 15.00)  | 8.37)   | -2.80)  |        |
|               |          |          |         |        | 144.64   | 142.95   |         |        | 1695.85  | 1279.87  |         |        |         |         |         |        |
| India         | 144.64   | 142.95   | -0.04   |        | (1593.51 | (1608.93 | 0.06    |        | (1694.43 | (1278.95 | -0.95   |        | 27.35   | 20.46   | -0.99   |        |
|               | (144.23, | (142.64, | (-0.22, | 0.652  | ,        | ,        | (-0.02, | 0.136  | ,        | ,        | (-1.35, | <0.001 | (27.17, | (20.34, | (-1.50, | <0.001 |
|               | 145.05)  | 143.25)  | 0.14)   |        | ,        | ,        | 0.14)   |        | ,        | ,        | -0.56)  |        | 27.53)  | 20.58)  | -0.47)  |        |
|               |          |          |         |        | 1596.24) | 1610.98) |         |        | 1697.27) | 1280.78) |         |        |         |         |         |        |
| Indonesia     | 97.48    | 98.86    | 0.05    | <0.001 | 1020.78  | 1053.90  | 0.12    | 0.003  | 1650.74  | 1234.21  | -0.99   | <0.001 | 26.36   | 19.16   | -1.08   | <0.001 |

|                            |          |          |         |        |          |          |         |        |          |          |         |         |         |         |         |        |
|----------------------------|----------|----------|---------|--------|----------|----------|---------|--------|----------|----------|---------|---------|---------|---------|---------|--------|
|                            | (96.76,  | (98.27,  | (0.04,  |        | (1018.47 | (1051.96 | (0.04,  |        | (1647.76 | (1232.11 | (-1.10, | (25.98, | (18.90, | (-1.20, |         |        |
|                            | 98.21)   | 99.46)   | 0.06)   |        | ,        | ,        | 0.20)   |        | ,        | ,        | -0.88)  | 26.75)  | 19.43)  | -0.97)  |         |        |
|                            |          |          |         |        | 1023.10) | 1055.85) |         |        | 1653.73) | 1236.31) |         |         |         |         |         |        |
|                            | 154.18   | 148.50   | -0.13   |        | 1900.82  | 1922.80  | 0.04    |        | 1311.63  | 837.73   | -1.53   | 20.45   | 12.07   | -1.81   |         |        |
| Iran (Islamic Republic of) | (152.46, | (147.25, | (-0.16, | <0.001 | (1894.82 | (1918.25 | (0.03,  | <0.001 | (1306.55 | (834.76, | (-1.64, | <0.001  | (19.81, | (11.72, | (-1.95, | <0.001 |
|                            | 155.91)  | 149.76)  | -0.10)  |        | ,        | ,        | 0.06)   |        | ,        | ,        | -1.42)  |         | 21.10)  | 12.43)  | -1.67)  |        |
|                            |          |          |         |        | 1906.82) | 1927.36) |         |        | 1316.72) |          |         |         |         |         |         |        |
|                            |          |          |         |        | 1922.06  | 1910.54  | -0.01   |        | 1723.64  | 1062.76  | -1.69   |         | 27.38   | 15.88   | -1.91   |        |
| Iraq                       | (156.56, | (152.34, | (-0.14, | <0.001 | (1910.88 | (1904.07 | (-0.05, | 0.839  | (1712.86 | (1057.88 | (-1.90, | <0.001  | (26.03, | (15.28, | (-2.14, | <0.001 |
|                            | 163.02)  | 156.02)  | -0.11)  |        | ,        | ,        | 0.04)   |        | ,        | ,        | -1.49)  |         | 28.80)  | 16.50)  | -1.67)  |        |
|                            |          |          |         |        | 1933.30) | 1917.03) |         |        | 1734.47) | 1067.67) |         |         |         |         |         |        |
|                            | 77.06    | 68.76    | -0.39   |        | 763.29   | 733.11   | -0.13   |        | 540.75   | 220.64   | -3.02   | 8.43    | 2.85    | -3.67   |         |        |
| Ireland                    | (72.43,  | (64.82,  | (-0.41, | <0.001 | (748.54, | (720.14, | (-0.23, | 0.009  | (528.36, | (213.65, | (-3.65, | <0.001  | (6.95,  | (2.12,  | (-4.42, | <0.001 |
|                            | 81.92)   | 72.88)   | -0.37)  |        | 778.25)  | 746.27)  | -0.03)  |        | 553.36)  | 227.82)  | -2.38)  |         | 10.15)  | 3.77)   | -2.92)  |        |
|                            | 65.50    | 62.54    | -0.16   |        | 594.22   | 598.60   | 0.05    |        | 504.70   | 185.50   | -3.39   | 7.81    | 2.31    | -4.17   |         |        |
| Israel                     | (61.88,  | (59.85,  | (-0.18, | <0.001 | (583.25, | (590.23, | (-0.06, | 0.378  | (494.60, | (180.86, | (-4.11, | <0.001  | (6.60,  | (1.82,  | (-4.67, | <0.001 |
|                            | 69.27)   | 65.32)   | -0.13)  |        | 605.34)  | 607.06)  | 0.15)   |        | 514.97)  | 190.23)  | -2.67)  |         | 9.18)   | 2.90)   | -3.67)  |        |
|                            |          |          |         |        | 1073.78  | 1079.63  | 0.02    |        | 519.56   | 254.65   | -2.48   | 7.98    | 3.43    | -2.89   |         |        |
| Italy                      | (122.45, | (115.65, | (-0.21, | <0.001 | (1069.39 | (1074.71 | (-0.11, | 0.763  | (516.51, | (252.25, | (-2.64, | <0.001  | (7.60,  | (3.17,  | (-3.12, | <0.001 |
|                            | 125.43)  | 118.92)  | -0.16)  |        | ,        | ,        | 0.14)   |        | 522.63)  | 257.06)  | -2.32)  |         | 8.37)   | 3.72)   | -2.67)  |        |
|                            |          |          |         |        | 1078.19) | 1084.57) |         |        |          |          |         |         |         |         |         |        |
|                            | 166.76   | 185.68   | 0.38    |        | 2166.80  | 2344.70  | 0.28    |        | 790.60   | 721.43   | -0.14   | 11.55   | 10.40   | -0.14   |         |        |
| Jamaica                    | (158.50, | (177.98, | (0.35,  | <0.001 | (2136.61 | (2317.15 | (0.26,  | <0.001 | (772.14, | (706.11, | (-0.96, | 0.738   | (9.38,  | (8.62,  | (-1.15, | 0.786  |
|                            | 175.37)  | 193.63)  | 0.41)   |        | ,        | ,        | 0.29)   |        | 809.41)  | 737.02)  | 0.69)   |         | 14.09)  | 12.43)  | 0.88)   |        |
|                            |          |          |         |        | 2197.34) | 2372.50) |         |        |          |          |         |         |         |         |         |        |
|                            | 125.37   | 130.00   | 0.13    |        | 1079.56  | 1163.56  | 0.26    |        | 444.86   | 294.88   | -1.42   | 6.52    | 3.82    | -1.83   |         |        |
| Japan                      | (124.34, | (128.81, | (0.10,  | <0.001 | (1076.54 | (1160.00 | (0.24,  | <0.001 | (442.93, | (293.09, | (-1.65, | <0.001  | (6.29,  | (3.62,  | (-2.10, | <0.001 |
|                            | 126.41)  | 131.20)  | 0.17)   |        | ,        | ,        | 0.29)   |        | 446.81)  | 296.68)  | -1.20)  |         | 6.76)   | 4.03)   | -1.57)  |        |
|                            |          |          |         |        | 1082.59) | 1167.12) |         |        |          |          |         |         |         |         |         |        |
|                            | 105.31   | 95.22    | -0.34   |        | 1301.02  | 1253.34  | -0.11   |        | 905.31   | 483.14   | -2.15   | 13.88   | 6.54    | -2.52   |         |        |
| Jordan                     | (99.53,  | (92.48,  | (-0.38, | <0.001 | (1280.76 | (1243.39 | (-0.25, | 0.096  | (887.96, | (476.93, | (-2.48, | <0.001  | (11.77, | (5.84,  | (-3.03, | <0.001 |
|                            | 111.37)  | 98.02)   | -0.31)  |        | ,        | ,        | 0.02)   |        | 922.93)  | 489.41)  | -1.81)  |         | 16.28)  | 7.32)   | -2.00)  |        |
|                            |          |          |         |        | 1321.54) | 1263.35) |         |        |          |          |         |         |         |         |         |        |

|              |          |          |         |        |          |          |         |        |          |          |         |        |         |         |         |        |
|--------------|----------|----------|---------|--------|----------|----------|---------|--------|----------|----------|---------|--------|---------|---------|---------|--------|
|              | 120.67   | 103.19   | -0.54   |        | 949.11   | 880.24   | -0.26   |        | 1599.75  | 1358.72  | -0.55   |        | 26.46   | 22.65   | -0.52   |        |
| Kazakhstan   | (118.07, | (100.88, | (-0.57, | <0.001 | (941.77, | (873.39, | (-0.29, | <0.001 | (1590.22 | (1350.36 | (-1.43, | 0.218  | (25.25, | (21.58, | (-1.46, | 0.278  |
|              | 123.32)  | 105.56)  | -0.51)  |        | 956.49)  | 887.15)  | -0.22)  |        | ,        | ,        | 0.33)   |        | 27.72)  | 23.76)  | 0.42)   |        |
|              |          |          |         |        | 2884.93  | 3061.49  |         |        | 1609.34) | 1367.12) |         |        |         |         |         |        |
|              | 172.18   | 170.96   | -0.02   |        | 2884.93  | 3061.49  | 0.21    |        | 776.54   | 805.50   | 0.11    |        | 10.16   | 10.52   | 0.09    |        |
| Kenya        | (169.33, | (169.21, | (-0.03, | 0.004  | (2873.11 | (3053.99 | (0.19,  | <0.001 | (770.17, | (801.56, | (0.02,  | 0.018  | (9.42,  | (10.07, | (-0.03, | 0.145  |
|              | 175.07)  | 172.73)  | -0.01)  |        | ,        | ,        | 0.24)   |        | 782.96)  | 809.46)  | 0.20)   |        | 10.94)  | 10.99)  | 0.21)   |        |
|              |          |          |         |        | 2896.79) | 3069.01) |         |        |          |          |         |        |         |         |         |        |
|              | 267.96   | 230.45   | -0.52   |        | 2063.60  | 1967.51  | -0.16   |        | 6414.36  | 5583.80  | -0.49   |        | 108.26  | 93.98   | -0.50   |        |
| Kiribati     | (210.82, | (189.27, | (-0.54, | <0.001 | (1899.59 | (1843.40 | (-0.19, | <0.001 | (6118.88 | (5371.90 | (-0.59, | <0.001 | (72.75, | (68.22, | (-0.58, | <0.001 |
|              | 336.57)  | 278.15)  | -0.50)  |        | ,        | ,        | -0.14)  |        | ,        | ,        | -0.40)  |        | 155.74) | 126.44) | -0.41)  |        |
|              |          |          |         |        | 2238.68) | 2097.96) |         |        | 6720.99) | 5802.08) |         |        |         |         |         |        |
|              | 91.94    | 94.41    | 0.10    |        | 1085.20  | 1147.90  | 0.20    |        | 974.47   | 679.85   | -1.12   |        | 15.14   | 10.10   | -1.24   |        |
| Kuwait       | (85.78,  | (90.40,  | (0.03,  | 0.005  | (1063.47 | (1133.25 | (0.16,  | <0.001 | (954.01, | (668.97, | (-2.30, | 0.067  | (12.69, | (8.85,  | (-2.58, | 0.072  |
|              | 98.48)   | 98.61)   | 0.17)   |        | ,        | ,        | 0.24)   |        | 995.32)  | 690.91)  | 0.08)   |        | 17.97)  | 11.54)  | 0.11)   |        |
|              |          |          |         |        | 1107.31) | 1162.74) |         |        |          |          |         |        |         |         |         |        |
|              | 168.55   | 150.45   | -0.39   |        | 1871.71  | 1779.44  | -0.18   |        | 1780.53  | 1031.92  | -1.83   |        | 28.85   | 16.18   | -1.92   |        |
| Kyrgyzstan   | (162.50, | (145.80, | (-0.41, | <0.001 | (1851.42 | (1763.36 | (-0.20, | <0.001 | (1760.36 | (1019.55 | (-2.75, | <0.001 | (26.32, | (14.66, | (-2.97, | <0.001 |
|              | 174.78)  | 155.23)  | -0.38)  |        | ,        | ,        | -0.16)  |        | ,        | ,        | -0.89)  |        | 31.57)  | 17.82)  | -0.86)  |        |
|              |          |          |         |        | 1892.17) | 1795.64) |         |        | 1800.88) | 1044.40) |         |        |         |         |         |        |
|              | 172.33   | 144.30   | -0.62   |        | 1653.37  | 1530.84  | -0.25   |        | 1660.46  | 1452.01  | -0.44   |        | 26.24   | 22.81   | -0.45   |        |
| Lao People's | (165.59, | (140.09, | (-0.67, | <0.001 | (1632.32 | (1517.06 | (-0.30, | <0.001 | (1638.89 | (1438.47 | (-0.62, | <0.001 | (23.56, | (21.13, | (-0.65, | <0.001 |
| Democratic   | 179.30)  | 148.61)  | -0.56)  |        | ,        | ,        | -0.19)  |        | ,        | ,        | -0.25)  |        | 29.15)  | 24.59)  | -0.25)  |        |
| Republic     |          |          |         |        | 1674.63) | 1544.71) |         |        | 1682.25) | 1465.66) |         |        |         |         |         |        |
|              | 104.94   | 108.11   | 0.11    |        | 699.61   | 758.54   | 0.33    |        | 1434.42  | 983.28   | -1.23   |        | 24.33   | 16.26   | -1.35   |        |
| Latvia       | (98.65,  | (99.97,  | (0.09,  | <0.001 | (683.29, | (737.10, | (0.15,  | <0.001 | (1411.05 | (959.25, | (-2.73, | 0.112  | (21.38, | (13.33, | (-2.97, | 0.109  |
|              | 111.54)  | 116.83)  | 0.13)   |        | 716.25)  | 780.54)  | 0.50)   |        | ,        | 1007.86) | 0.29)   |        | 27.60)  | 19.77)  | 0.31)   |        |
|              |          |          |         |        |          |          |         |        | 1458.10) |          |         |        |         |         |         |        |
|              | 89.23    | 90.37    | 0.05    |        | 1278.27  | 1358.64  | 0.22    |        | 1668.19  | 1124.30  | -1.34   |        | 27.12   | 17.40   | -1.51   |        |
| Lebanon      | (83.71,  | (86.39,  | (0.01,  | 0.018  | (1257.40 | (1342.83 | (0.16,  | <0.001 | (1643.99 | (1110.05 | (-1.45, | <0.001 | (24.09, | (15.68, | (-1.62, | <0.001 |
|              | 95.04)   | 94.50)   | 0.09)   |        | ,        | ,        | 0.27)   |        | ,        | ,        | -1.23)  |        | 30.44)  | 19.28)  | -1.39)  |        |
|              |          |          |         |        | 1299.42) | 1374.61) |         |        | 1692.68) | 1138.71) |         |        |         |         |         |        |
| Lesotho      | 173.10   | 189.92   | 0.33    | <0.001 | 2325.47  | 2405.57  | 0.13    | <0.001 | 767.86   | 1083.52  | 1.22    | <0.001 | 10.70   | 16.26   | 1.49    | <0.001 |

|            |                     |                     |                   |        |                                |                                |                   |        |                                |                           |                   |                  |                   |                   |                   |        |
|------------|---------------------|---------------------|-------------------|--------|--------------------------------|--------------------------------|-------------------|--------|--------------------------------|---------------------------|-------------------|------------------|-------------------|-------------------|-------------------|--------|
|            | (163.20,<br>183.50) | (181.20,<br>198.95) | (0.30,<br>0.35)   |        | (2288.49<br>,<br>2362.95)      | (2374.32<br>,<br>2437.15)      | (0.08,<br>0.18)   |        | (746.02,<br>790.22)            | (1062.27<br>,<br>1105.10) | (1.05,<br>1.40)   | (8.22,<br>13.73) | (13.73,<br>19.12) | (1.27,<br>1.71)   |                   |        |
|            | 155.91              | 160.17              | 0.09              |        | 2348.83                        | 2519.71                        | 0.25              |        | 1122.06                        | 928.38                    | -0.69             | 16.68            | 13.27             | -0.83             |                   |        |
| Liberia    | (146.43,<br>165.87) | (154.56,<br>165.94) | (0.08,<br>0.10)   | <0.001 | (2311.51<br>,<br>2386.61)      | (2497.29<br>,<br>2542.28)      | (0.21,<br>0.30)   | <0.001 | (1096.09<br>,<br>1148.49)      | (914.51,<br>942.42)       | (-0.95,<br>-0.43) | <0.001           | (13.64,<br>20.21) | (11.64,<br>15.07) | (-1.13,<br>-0.53) | <0.001 |
|            | 125.07              | 137.64              | 0.33              |        | 1729.47                        | 1965.18                        | 0.44              |        | 1650.15                        | 1344.24                   | -0.78             | 26.01            | 20.59             | -0.90             |                   |        |
| Libya      | (119.40,<br>130.95) | (133.53,<br>141.85) | (0.29,<br>0.36)   | <0.001 | (1708.28<br>,<br>1750.88)      | (1949.53<br>,<br>1980.92)      | (0.36,<br>0.53)   | <0.001 | (1629.19<br>,<br>1671.33)      | (1331.41<br>,<br>1357.17) | (-1.36,<br>-0.20) | 0.009            | (23.41,<br>28.84) | (19.04,<br>22.24) | (-1.57,<br>-0.23) | 0.009  |
|            | 116.47              | 116.09              | -0.00             |        | 950.06                         | 960.09                         | 0.06              |        | 1155.27                        | 713.43                    | -1.67             | 19.14            | 11.30             | -1.81             |                   |        |
| Lithuania  | (110.90,<br>122.25) | (109.09,<br>123.47) | (-0.04,<br>0.04)  | 0.854  | (934.02,<br>966.32)            | (939.69,<br>980.86)            | (-0.03,<br>0.15)  | 0.181  | (1137.58<br>,<br>1173.17)      | (696.11,<br>731.12)       | (-2.91,<br>-0.42) | 0.009            | (16.92,<br>21.58) | (9.23,<br>13.77)  | (-3.18,<br>-0.42) | 0.011  |
|            | 66.38               | 62.59               | -0.19             |        | 931.04                         | 933.31                         | 0.03              |        | 651.03                         | 261.70                    | -3.15             | 10.02            | 3.31              | -3.82             |                   |        |
| Luxembourg | (54.15,<br>80.96)   | (52.66,<br>74.10)   | (-0.24,<br>-0.14) | <0.001 | (882.91,<br>981.47)            | (893.18,<br>974.98)            | (-0.05,<br>0.12)  | 0.434  | (611.24,<br>693.08)            | (241.00,<br>283.94)       | (-3.65,<br>-2.65) | <0.001           | (5.69,<br>16.94)  | (1.41,<br>7.03)   | (-4.45,<br>-3.18) | <0.001 |
|            | 219.46              | 207.30              | -0.21             |        | 3301.29                        | 3457.53                        | 0.17              |        | 3039.25                        | 2014.90                   | -1.36             | 48.50            | 31.03             | -1.47             |                   |        |
| Madagascar | (215.02,<br>223.98) | (204.55,<br>210.08) | (-0.23,<br>-0.18) | <0.001 | (3284.04<br>,<br>3318.62)      | (3446.27<br>,<br>3468.82)      | (0.14,<br>0.19)   | <0.001 | (3022.16<br>,<br>3056.42)      | (2006.04<br>,<br>2023.80) | (-1.72,<br>-1.00) | <0.001           | (46.34,<br>50.75) | (29.93,<br>32.17) | (-1.87,<br>-1.07) | <0.001 |
|            | 193.92              | 194.56              | 0.01              |        | 2965.77                        | 3104.92                        | 0.17              |        | 1200.14                        | 963.18                    | -0.71             | 17.45            | 13.25             | -0.90             |                   |        |
| Malawi     | (189.32,<br>198.62) | (191.39,<br>197.77) | (0.00,<br>0.02)   | 0.047  | (2947.48<br>,<br>2984.15)      | (3092.01<br>,<br>3117.87)      | (0.09,<br>0.25)   | <0.001 | (1188.11<br>,<br>1212.26)      | (955.79,<br>970.62)       | (-0.83,<br>-0.59) | <0.001           | (16.00,<br>19.00) | (12.38,<br>14.17) | (-1.04,<br>-0.77) | <0.001 |
|            | 134.07              | 124.30              | -0.26             |        | 1893.89                        | 1860.94                        | -0.06             |        | 1244.63                        | 997.96                    | -0.79             | 18.46            | 14.69             | -0.82             |                   |        |
| Malaysia   | (131.41,<br>136.77) | (122.45,<br>126.18) | (-0.28,<br>-0.24) | <0.001 | (1883.85<br>,<br>1903.97)      | (1853.76<br>,<br>1868.15)      | (-0.09,<br>-0.03) | <0.001 | (1236.43<br>,<br>1252.88)      | (992.71,<br>1003.24)      | (-1.50,<br>-0.07) | 0.032            | (17.46,<br>19.49) | (14.06,<br>15.34) | (-1.64,<br>0.01)  | 0.052  |
|            | 128.75              | 108.93              | -0.58             |        | 1622.50                        | 1541.36                        | -0.17             |        | 1822.58                        | 667.46                    | -3.40             | 29.36            | 9.31              | -3.87             |                   |        |
| Maldives   | (103.34,<br>159.27) | (96.08,<br>123.37)  | (-0.63,<br>-0.53) | <0.001 | (1529.07<br>,<br>,<br>1622.50) | (1492.21<br>,<br>,<br>1541.36) | (-0.20,<br>-0.14) | <0.001 | (1718.86<br>,<br>,<br>1822.58) | (636.49,<br>,<br>667.46)  | (-3.80,<br>-3.00) | <0.001           | (17.39,<br>47.05) | (6.05,<br>14.28)  | (-4.51,<br>-3.22) | <0.001 |

|                       |          |          |         |        |          |          |         |        |          |          |         |        |         |         |         |        |
|-----------------------|----------|----------|---------|--------|----------|----------|---------|--------|----------|----------|---------|--------|---------|---------|---------|--------|
|                       |          |          |         |        | 1720.79) | 1592.03) |         |        | 1931.41) |          |         |        |         |         |         |        |
|                       |          |          |         |        | 2654.61  | 2696.66  |         |        | 1494.00  | 1081.64  |         |        |         |         |         |        |
|                       | 172.70   | 163.73   | -0.18   |        |          |          | 0.06    |        |          |          | -1.09   | 22.79  | 15.71   | -1.25   |         |        |
| Mali                  | (167.90, | (160.84, | (-0.19, | <0.001 | (2635.73 | (2684.94 | (0.03,  | <0.001 | (1479.44 | (1073.90 | (-1.30, | <0.001 | (21.01, | (14.77, | (-1.49, | <0.001 |
|                       | 177.61)  | 166.65)  | -0.18)  |        | ,        | ,        | 0.09)   |        | ,        | ,        | -0.87)  |        | 24.69)  | 16.69)  | -1.01)  |        |
|                       |          |          |         |        | 2673.60) | 2708.43) |         |        | 1508.67) | 1089.42) |         |        |         |         |         |        |
|                       | 66.51    | 61.98    | -0.24   |        | 633.29   | 594.15   | -0.19   |        | 537.18   | 331.69   | -1.69   |        | 8.24    | 4.82    | -1.87   |        |
| Malta                 | (53.82,  | (49.83,  | (-0.26, | <0.001 | (592.66, | (555.07, | (-0.36, | 0.022  | (499.87, | (302.86, | (-2.17, | <0.001 | (4.25,  | (1.98,  | (-2.18, | <0.001 |
|                       | 81.48)   | 76.68)   | -0.23)  |        | 676.13)  | 635.66)  | -0.03)  |        | 576.71)  | 362.95)  | -1.21)  |        | 14.70)  | 10.61)  | -1.56)  |        |
|                       |          |          |         |        | 1718.01  | 1746.10  |         |        | 3414.64  | 3976.74  |         |        | 55.93   | 66.91   | 0.64    |        |
| Marshall Islands      | (116.84, | (129.08, | (0.01,  | 0.006  | (1520.15 | (1582.05 | (0.04,  | <0.001 | (3128.59 | (3726.81 | (0.46,  | <0.001 | (24.85, | (38.14, | (0.55,  | <0.001 |
|                       | 257.36)  | 241.56)  | 0.08)   |        | ,        | ,        | 0.08)   |        | ,        | ,        | 0.60)   |        | 109.61) | 109.13) | 0.73)   |        |
|                       |          |          |         |        | 1935.72) | 1922.71) |         |        | 3720.78) | 4239.19) |         |        |         |         |         |        |
|                       | 158.97   | 145.95   | -0.30   |        | 2602.11  | 2614.95  |         |        | 1193.43  |          |         |        | 17.60   | 8.75    | -2.34   |        |
| Mauritania            | (149.92, | (139.94, | (-0.31, | <0.001 | (2565.25 | (2589.33 | (-0.00, | 0.133  | (1167.86 | 675.34   | -1.91   |        | (14.58, | (7.26,  | (-2.51, | <0.001 |
|                       | 168.44)  | 152.17)  | -0.28)  |        | ,        | ,        | 0.03)   |        | ,        | 688.91)  | -1.78)  |        | 21.08)  | 10.46)  | -2.18)  |        |
|                       |          |          |         |        | 2639.39) | 2640.78) |         |        | 1219.43) |          |         |        |         |         |         |        |
|                       | 128.13   | 117.68   | -0.29   |        | 1711.60  | 1629.41  | -0.16   |        | 1704.31  | 1022.90  | -1.64   |        | 27.48   | 15.49   | -1.87   |        |
| Mauritius             | (118.36, | (108.11, | (-0.30, | <0.001 | (1675.42 | (1593.26 | (-0.19, | <0.001 | (1667.99 | 994.65,  | (-1.82, | <0.001 | (23.03, | (12.20, | (-2.07, | <0.001 |
|                       | 138.52)  | 127.89)  | -0.28)  |        | ,        | ,        | -0.13)  |        | ,        | 1051.78) | -1.47)  |        | 32.55)  | 19.43)  | -1.68)  |        |
|                       |          |          |         |        | 1748.38) | 1666.20) |         |        | 1741.23) |          |         |        |         |         |         |        |
|                       | 108.22   | 97.18    | -0.37   |        | 1479.08  | 1402.02  | -0.18   |        | 708.11   | 607.69   | -0.46   |        | 10.68   | 9.01    | -0.51   |        |
| Mexico                | (107.09, | (96.32,  | (-0.41, | <0.001 | (1474.92 | (1398.75 | (-0.23, | <0.001 | (705.16, | (605.53, | (-0.92, | 0.055  | (10.32, | (8.75,  | (-1.05, | 0.061  |
|                       | 109.35)  | 98.05)   | -0.34)  |        | ,        | ,        | -0.13)  |        | 711.07)  | 609.86)  | 0.01)   |        | 11.05)  | 9.28)   | 0.02)   |        |
|                       |          |          |         |        | 1483.24) | 1405.31) |         |        |          |          |         |        |         |         |         |        |
|                       | 194.32   | 167.90   | -0.51   |        | 1777.75  | 1679.94  | -0.18   |        | 4255.70  | 3873.14  | -0.33   |        | 71.80   | 64.74   | -0.36   |        |
| Micronesia            | (151.63, | (129.85, | (-0.52, | <0.001 | (1644.52 | (1555.14 | (-0.23, | <0.001 | (4043.07 | (3678.38 | (-0.38, | <0.001 | (46.47, | (41.68, | (-0.42, | <0.001 |
| (Federated States of) | 245.78)  | 214.05)  | -0.49)  |        | ,        | ,        | -0.12)  |        | ,        | ,        | -0.27)  |        | 106.36) | 96.29)  | -0.30)  |        |
|                       |          |          |         |        | 1919.38) | 1812.50) |         |        | 4476.93) | 4075.82) |         |        |         |         |         |        |
|                       | 70.73    | 70.64    | -0.01   |        | 565.55   | 572.18   | 0.07    |        | 545.31   | 349.68   | -1.52   |        | 8.59    | 5.23    | -1.71   |        |
| Monaco                | (28.02,  | (27.87,  | (-0.02, | 0.400  | (425.86, | (431.74, | (-0.03, | 0.181  | (408.77, | (242.35, | (-1.57, | <0.001 | (0.13,  | (0.01,  | (-1.76, | <0.001 |
|                       | 159.82)  | 150.19)  | 0.01)   |        | 745.07)  | 745.97)  | 0.18)   |        | 721.63)  | 490.79)  | -1.47)  |        | 73.93)  | 53.60)  | -1.65)  |        |
|                       |          |          |         |        |          |          |         |        |          |          |         |        |         |         |         |        |
|                       | 187.73   | 176.38   | -0.21   |        | 1938.73  | 1929.83  | -0.00   |        | 2010.50  | 1765.74  | -0.40   |        | 32.87   | 28.89   | -0.41   |        |
| Mongolia              | (178.30, | (169.39, | (-0.23, | <0.001 | (1908.18 | (1906.58 | (-0.04, | 0.861  | (1977.96 | (1744.25 | (-0.84, | 0.077  | (28.77, | (26.21, | (-0.89, | 0.099  |



|             |          |          |         |        |           |           |         |        |           |           |         |         |         |         |         |        |
|-------------|----------|----------|---------|--------|-----------|-----------|---------|--------|-----------|-----------|---------|---------|---------|---------|---------|--------|
|             | 197.58)  | 183.62)  | -0.20)  |        | ,         | ,         | 0.03)   |        | ,         | ,         | 0.04)   | 37.43)  | 31.80)  | 0.08)   |         |        |
|             |          |          |         |        | 1969.71)  | 1953.31)  |         |        | 2043.48)  | 1787.46)  |         |         |         |         |         |        |
|             |          |          |         |        |           |           |         |        | 1192.30)  |           |         |         |         |         |         |        |
|             | 104.24)  | 98.10)   | -0.21)  |        | 926.21)   | 917.31)   | -0.02)  |        | (1150.23) | 682.58)   | -2.15)  | 19.36)  | 10.48)  | -2.36)  |         |        |
| Montenegro  | (92.04,  | (85.45,  | (-0.24, | <0.001 | (889.10,  | (877.81,  | (-0.11, | 0.714  | (648.85,  | (-3.51,   | 0.002   | (14.33, | (6.71,  | (-3.78, | 0.001   |        |
|             | 117.62)  | 112.19)  | -0.17)  |        | 964.49)   | 958.22)   | 0.07)   |        | ,         | 717.71)   | -0.77)  | 25.60)  | 15.75)  | -0.92)  |         |        |
|             |          |          |         |        |           |           |         |        | 1235.55)  |           |         |         |         |         |         |        |
|             |          |          |         |        | 1882.55)  | 1919.43)  |         |        | 1622.12)  | 1008.05)  |         |         |         |         |         |        |
| Morocco     | 148.03)  | 146.35)  | -0.04)  |        | (1873.93) | (1912.35) | 0.08)   |        | (1613.95) | (1002.93) | -1.58)  | 25.89)  | 15.05)  | -1.81)  |         |        |
|             | (145.62, | (144.40, | (-0.05, | <0.001 |           |           | (0.01,  | 0.028  |           |           | (-1.81, | <0.001  | (24.86, | (14.43, | (-2.07, | <0.001 |
|             | 150.48)  | 148.32)  | -0.03)  |        | ,         | ,         |         |        | ,         | ,         |         |         |         |         |         |        |
|             |          |          |         |        | 1891.21)  | 1926.53)  | 0.16)   |        | 1630.32)  | 1013.19)  | -1.35)  | 26.96)  | 15.69)  | -1.54)  |         |        |
|             |          |          |         |        | 2981.07)  | 3139.40)  |         |        | 887.04)   | 1054.63)  | 0.62)   | 12.14)  | 14.89)  | 0.72)   |         |        |
| Mozambique  | 201.36)  | 205.69)  | 0.07)   |        | (2964.90) | (3128.64) | 0.19)   |        | (878.03,  | (1048.14) | 0.62)   | (11.09, | (14.12, | (0.61,  | <0.001  |        |
|             | (197.22, | (202.98, | (0.05,  | <0.001 |           |           | (0.11,  | <0.001 |           |           | (0.43,  | <0.001  |         |         |         |        |
|             | 205.57)  | 208.43)  | 0.09)   |        | ,         | ,         | 0.28)   |        | 896.12)   | ,         | 0.81)   | 13.26)  | 15.70)  | 0.84)   |         |        |
|             |          |          |         |        | 2997.32)  | 3150.19)  |         |        |           | 1061.14)  |         |         |         |         |         |        |
|             |          |          |         |        | 1574.67)  | 1492.64)  |         |        | 2791.62)  | 1464.24)  |         |         |         |         |         |        |
| Myanmar     | 149.04)  | 129.74)  | -0.48)  |        | (1568.55) | (1487.54) | -0.17)  |        | (2783.35) | (1459.18) | -2.22)  | 45.94)  | 22.87)  | -2.40)  |         |        |
|             | (147.16, | (128.24, | (-0.51, | <0.001 |           |           | (-0.29, | 0.011  |           |           | (-2.36, | <0.001  | (44.88, | (22.24, | (-2.61, | <0.001 |
|             | 150.93)  | 131.26)  | -0.46)  |        | ,         | ,         | -0.04)  |        | ,         | ,         | -2.08)  |         | 47.02)  | 23.51)  | -2.20)  |        |
|             |          |          |         |        | 1580.80)  | 1497.75)  |         |        | 2799.92)  | 1469.31)  |         |         |         |         |         |        |
|             |          |          |         |        | 2443.87)  | 2433.37)  |         |        | 844.86)   | 664.05)   | -0.77)  | 11.93)  | 8.84)   | -0.95)  |         |        |
| Namibia     | 169.74)  | 159.04)  | -0.23)  |        | (2401.37) | (2402.93) | -0.02)  |        | (818.97,  | (647.90,  | (-1.08, | <0.001  | (8.98,  | (7.05,  | (-1.34, | <0.001 |
|             | (158.74, | (151.35, | (-0.24, | <0.001 |           |           | (-0.03, | 0.025  |           |           |         |         |         |         |         |        |
|             | 181.38)  | 167.04)  | -0.21)  |        | ,         | ,         | -0.00)  |        | 871.41)   | 680.52)   | -0.47)  | 15.59)  | 10.97)  | -0.56)  |         |        |
|             |          |          |         |        | 2486.99)  | 2464.13)  |         |        |           |           |         |         |         |         |         |        |
|             |          |          |         |        | 1167.69)  | 1130.34)  | -0.11)  |        | 4750.29)  | 4989.01)  | 0.17)   | 80.88)  | 84.97)  | 0.17)   |         |        |
| Nauru       | 154.17)  | 147.35)  | -0.14)  |        | (851.80,  | (836.04,  | (-0.19, | 0.004  | (4083.52) | (4341.68) | (0.00,  | 0.046   | (17.05, | (21.08, | (0.00,  | 0.050  |
|             | (56.13,  | (55.98,  | (-0.30, | 0.093  |           |           |         |        |           |           |         |         |         |         |         |        |
|             | 341.08)  | 318.02)  | 0.02)   |        | 1565.22)  | 1497.46)  | -0.03)  |        | 5497.04)  | 5707.75)  | 0.33)   | 237.79) | 231.46) | 0.33)   |         |        |
|             |          |          |         |        | 1305.87)  | 1302.02)  | 0.01)   |        | 1360.77)  | 813.89)   | -1.74)  | 22.11)  | 12.51)  | -1.93)  |         |        |
| Nepal       | 130.73)  | 122.52)  | -0.21)  |        | (1297.30) | (1295.67) | (-0.04, | 0.743  | (1351.89) | (808.81,  | (-1.88, | <0.001  | (20.98, | (11.88, | (-2.09, | <0.001 |
|             | (128.07, | (120.60, | (-0.26, | <0.001 |           |           |         |        |           |           |         |         |         |         |         |        |
|             | 133.43)  | 124.46)  | -0.16)  |        | ,         | ,         | 0.06)   |        | ,         | 819.00)   | -1.60)  | 23.29)  | 13.17)  | -1.77)  |         |        |
|             |          |          |         |        | 1314.49)  | 1308.41)  |         |        | 1369.70)  |           |         |         |         |         |         |        |
|             |          |          |         |        | 786.96)   | 807.40)   | 0.09)   |        | 479.11)   | 213.24)   | -2.76)  | 7.37)   | 2.67)   | -3.47)  |         |        |
| Netherlands | 92.69)   | 83.97)   | -0.34)  |        | (779.98,  | (799.82,  | (0.04,  | <0.001 | (473.69,  | (209.36,  | (-3.00, | <0.001  | (6.72,  | (2.25,  | (-3.78, | <0.001 |
|             | (90.31,  | (81.54,  | (-0.36, | <0.001 |           |           |         |        |           |           |         |         |         |         |         |        |
|             | 95.12)   | 86.46)   | -0.32)  |        | 793.99)   | 815.03)   | 0.13)   |        | 484.59)   | 217.16)   | -2.51)  | 8.08)   | 3.14)   | -3.17)  |         |        |

|                          |          |          |         |        |           |           |         |        |           |           |         |        |         |         |         |        |
|--------------------------|----------|----------|---------|--------|-----------|-----------|---------|--------|-----------|-----------|---------|--------|---------|---------|---------|--------|
|                          | 101.05   | 92.04    | -0.31   |        | 634.89    | 645.00    | 0.07    |        | 647.75    | 322.27    | -2.42   |        | 10.41   | 4.70    | -2.68   |        |
| New Zealand              | (95.83,  | (87.14,  | (-0.37, | <0.001 | (621.71,  | (631.94,  | (-0.04, | 0.200  | (634.44,  | (313.06,  | (-2.65, | <0.001 | (8.78,  | (3.65,  | (-3.09, | <0.001 |
|                          | 106.48)  | 97.15)   | -0.24)  |        | 648.28)   | 658.26)   | 0.17)   |        | 661.28)   | 331.69)   | -2.19)  |        | 12.25)  | 5.97)   | -2.28)  |        |
|                          |          |          |         |        | 2090.27   | 2134.10   | 0.08    |        | 707.75    | 472.14    | -1.43   |        | 10.23   | 5.98    | -1.89   |        |
| Nicaragua                | (137.10, | (135.70, | (-0.10, | <0.001 | (2065.89, | (2116.94, | (0.05,  | <0.001 | (693.12,  | (464.05,  | (-2.09, | <0.001 | (8.51,  | (5.10,  | (-2.87, | <0.001 |
|                          | 149.84)  | 144.53)  | -0.06)  |        | ,         | ,         | 0.10)   |        | 722.62)   | 480.33)   | -0.76)  |        | 12.21)  | 6.98)   | -0.89)  |        |
|                          |          |          |         |        | 2436.65   | 2576.80   | 0.21    |        | 1156.18   | 943.44    | -0.69   |        | 17.16   | 13.48   | -0.82   |        |
| Niger                    | (147.82, | (148.84, | (-0.04, | 0.077  | (2417.75, | (2565.22, | (0.12,  | <0.001 | (1142.73, | (936.10,  | (-0.99, | <0.001 | (15.53, | (12.60, | (-1.20, | <0.001 |
|                          | 157.39)  | 154.51)  | 0.00)   |        | ,         | ,         | 0.29)   |        | ,         | 950.84)   | -0.40)  |        | 18.93)  | 14.41)  | -0.45)  |        |
|                          |          |          |         |        | 2455.67)  | 2588.44)  |         |        | 1169.76)  |           |         |        |         |         |         |        |
|                          |          |          |         |        | 2658.64   | 2934.69   | 0.35    |        | 944.64    | 713.42    | -0.98   |        | 13.44   | 9.19    | -1.31   |        |
| Nigeria                  | (140.85, | (144.06, | (0.04,  | <0.001 | (2653.05, | (2930.93, | (0.32,  | <0.001 | (941.19,  | (711.50,  | (-1.19, | <0.001 | (13.03, | (8.97,  | (-1.54, | <0.001 |
|                          | 143.45)  | 145.73)  | 0.11)   |        | ,         | ,         | 0.39)   |        | 948.11)   | 715.35)   | -0.77)  |        | 13.87)  | 9.42)   | -1.08)  |        |
|                          |          |          |         |        | 2664.24)  | 2938.45)  |         |        |           |           |         |        |         |         |         |        |
|                          |          |          |         |        | 1039.41   | 1043.85   | 0.02    |        | 2615.29   | 1924.01   | -1.07   |        | 43.55   | 31.07   | -1.18   |        |
| Niue                     | (1.67,   | (0.29,   | (-0.19, | <0.001 | (445.49,  | (373.66,  | (-0.02, | 0.349  | (1586.21, | (945.02,  | (-1.30, | <0.001 | (0.00,  | (0.00,  | (-1.41, | <0.001 |
|                          | 727.88)  | 931.99)  | -0.18)  |        | 2072.84)  | 2338.98)  | 0.07)   |        | ,         | 3509.01)  | -0.84)  |        | 603.26) | 792.18) | -0.94)  |        |
|                          |          |          |         |        |           |           |         |        | 4070.42)  |           |         |        |         |         |         |        |
|                          |          |          |         |        | 850.38    | 850.18    | 0.02    |        | 1214.93   | 763.75    | -1.53   |        | 19.48   | 11.73   | -1.65   |        |
| North Macedonia          | (90.73,  | (85.94,  | (-0.20, | <0.001 | (830.54,  | (830.38,  | (-0.12, | 0.752  | (1191.20, | (745.03,  | (-2.09, | <0.001 | (16.58, | (9.54,  | (-2.27, | <0.001 |
|                          | 104.37)  | 99.26)   | -0.17)  |        | 870.58)   | 870.39)   | 0.16)   |        | ,         | 782.88)   | -0.97)  |        | 22.75)  | 14.36)  | -1.03)  |        |
|                          |          |          |         |        |           |           |         |        | 1239.02)  |           |         |        |         |         |         |        |
|                          |          |          |         |        | 1780.75   | 1822.90   | 0.09    |        | 1749.92   | 1354.84   | -0.76   |        | 27.83   | 20.90   | -0.84   |        |
| Northern Mariana Islands | (93.05,  | (73.33,  | (-0.15, | <0.001 | (1614.07, | (1586.75, | (0.01,  | 0.020  | (1587.67, | (1141.43, | (-1.05, | <0.001 | (11.02, | (2.78,  | (-1.20, | <0.001 |
|                          | 192.98)  | 221.99)  | -0.07)  |        | ,         | ,         | 0.17)   |        | ,         | ,         | -0.48)  |        | 60.42)  | 77.84)  | -0.47)  |        |
|                          |          |          |         |        | 1961.23)  | 2088.08)  |         |        | 1925.70)  | 1599.27)  |         |        |         |         |         |        |
|                          |          |          |         |        | 925.35    | 945.96    | 0.09    |        | 487.99    | 186.30    | -3.26   |        | 7.45    | 2.11    | -4.22   |        |
| Norway                   | (103.04, | (97.26,  | (-0.22, | <0.001 | (910.68,  | (931.93,  | (0.01,  | 0.022  | (477.38,  | (180.12,  | (-3.62, | <0.001 | (6.19,  | (1.51,  | (-4.71, | <0.001 |
|                          | 113.18)  | 106.57)  | -0.19)  |        | 940.22)   | 960.17)   | 0.16)   |        | 498.79)   | 192.66)   | -2.89)  |        | 8.90)   | 2.90)   | -3.72)  |        |
|                          |          |          |         |        |           |           |         |        |           |           |         |        |         |         |         |        |
|                          |          |          |         |        | 1149.01   | 1280.36   | 0.38    |        | 1365.60   | 765.40    | -1.94   |        | 21.92   | 11.18   | -2.27   |        |
| Oman                     | (85.38,  | (88.92,  | (-0.04, | 0.355  | (1125.65, | (1265.75, | (0.30,  | <0.001 | (1340.16, | (754.15,  | (-2.41, | <0.001 | (18.80, | (9.88,  | (-2.78, | <0.001 |
|                          | 98.72)   | 96.40)   | 0.11)   |        | ,         | ,         | 0.47)   |        | ,         | 776.82)   | -1.46)  |        | 25.42)  | 12.65)  | -1.76)  |        |

|                  |          |          |         |        |          |          |         |        |          |          |         |        |         |         |         |        |
|------------------|----------|----------|---------|--------|----------|----------|---------|--------|----------|----------|---------|--------|---------|---------|---------|--------|
|                  |          |          |         |        | 1172.75) | 1295.14) |         |        | 1391.41) |          |         |        |         |         |         |        |
|                  |          |          |         |        | 1852.43  | 1952.01  |         |        | 1727.87  | 2158.13  |         |        |         |         |         |        |
|                  | 171.95   | 177.44   | 0.11    |        |          |          | 0.20    |        |          |          | 0.79    |        | 27.84   | 35.11   | 0.82    |        |
| Pakistan         | (170.64, | (176.56, | (0.08,  | <0.001 | (1848.03 | (1949.05 | (0.10,  | <0.001 | (1723.51 | (2154.96 | (0.70,  | <0.001 | (27.29, | (34.71, | (0.73,  | <0.001 |
|                  | 173.28)  | 178.33)  | 0.15)   |        | ,        | ,        | 0.31)   |        | ,        | ,        | 0.87)   |        | 28.41)  | 35.53)  | 0.91)   |        |
|                  |          |          |         |        | 1856.83) | 1954.98) |         |        | 1732.24) | 2161.31) |         |        |         |         |         |        |
|                  |          |          |         |        | 1239.10  | 1269.42  | 0.10    |        | 2624.02  | 2592.37  | -0.10   |        | 43.57   | 43.11   | -0.11   |        |
| Palau            | (48.02,  | (47.58,  | (0.00,  | 0.032  | (989.22, | (1005.69 | (0.03,  | 0.009  | (2250.61 | (2217.34 | (-0.39, | 0.513  | (8.66,  | (8.48,  | (-0.44, | 0.528  |
|                  | 228.92)  | 238.23)  | 0.08)   |        | 1534.52) | ,        | 0.18)   |        | ,        | ,        | 0.20)   |        | 131.55) | 137.20) | 0.23)   |        |
|                  |          |          |         |        | 1584.49) |          |         |        | 3042.90) | 3016.67) |         |        |         |         |         |        |
|                  |          |          |         |        | 1784.74  | 1824.37  | 0.09    |        | 1023.86  | 651.03   | -1.57   |        | 15.62   | 9.08    | -1.88   |        |
| Palestine        | (122.54, | (122.45, | (-0.13, | <0.001 | (1752.31 | (1805.34 | (0.01,  | 0.025  | (998.52, | (639.46, | (-1.83, | <0.001 | (12.58, | (7.75,  | (-2.19, | <0.001 |
|                  | 140.33)  | 132.57)  | -0.07)  |        | ,        | ,        | 0.17)   |        | 1049.73) | 662.76)  | -1.30)  |        | 19.22)  | 10.60)  | -1.57)  |        |
|                  |          |          |         |        | 1969.45  | 1971.49  | 0.01    |        | 766.16   | 518.05   | -1.27   |        | 11.23   | 6.98    | -1.54   |        |
| Panama           | (125.05, | (121.60, | (-0.14, | <0.001 | (1941.59 | (1949.74 | (-0.06, | 0.859  | (748.54, | (506.90, | (-1.87, | <0.001 | (9.16,  | (5.74,  | (-2.28, | <0.001 |
|                  | 139.56)  | 132.73)  | -0.12)  |        | ,        | ,        | 0.07)   |        | 784.10)  | 529.39)  | -0.67)  |        | 13.63)  | 8.41)   | -0.80)  |        |
|                  |          |          |         |        | 1997.62) | 1993.44) |         |        |          |          |         |        |         |         |         |        |
|                  |          |          |         |        | 1566.91  | 1627.91  | 0.14    |        | 2212.80  | 2335.95  | 0.13    |        | 35.79   | 37.77   | 0.12    |        |
| Papua New Guinea | (157.26, | (163.74, | (0.08,  | <0.001 | (1547.08 | (1615.35 | (0.10,  | <0.001 | (2188.76 | (2320.76 | (-0.06, | 0.186  | (32.76, | (35.85, | (-0.07, | 0.220  |
|                  | 170.27)  | 171.87)  | 0.10)   |        | ,        | ,        | 0.18)   |        | ,        | ,        | 0.31)   |        | 39.03)  | 39.77)  | 0.31)   |        |
|                  |          |          |         |        | 1586.95) | 1640.54) |         |        | 2237.05) | 2351.22) |         |        |         |         |         |        |
|                  |          |          |         |        | 2089.36  | 2130.33  | 0.07    |        | 844.40   | 613.56   | -0.97   |        | 12.68   | 8.58    | -1.21   |        |
| Paraguay         | (130.61, | (128.94, | (-0.10, | <0.001 | (2066.39 | (2113.72 | (0.04,  | <0.001 | (829.48, | (604.61, | (-1.56, | 0.001  | (10.89, | (7.54,  | (-2.07, | 0.006  |
|                  | 142.40)  | 137.29)  | -0.06)  |        | ,        | ,        | 0.10)   |        | 859.53)  | 622.61)  | -0.38)  |        | 14.68)  | 9.71)   | -0.35)  |        |
|                  |          |          |         |        | 2112.52) | 2147.03) |         |        |          |          |         |        |         |         |         |        |
|                  |          |          |         |        | 2060.03  | 2116.18  | 0.09    |        | 1178.07  | 629.35   | -2.09   |        | 17.83   | 8.52    | -2.49   |        |
| Peru             | (126.76, | (118.48, | (-0.27, | <0.001 | (2050.35 | (2108.46 | (0.07,  | <0.001 | (1170.67 | (625.15, | (-3.02, | <0.001 | (16.92, | (8.03,  | (-3.58, | <0.001 |
|                  | 131.58)  | 122.17)  | -0.23)  |        | ,        | ,        | 0.11)   |        | ,        | ,        | -1.15)  |        | 18.78)  | 9.02)   | -1.38)  |        |
|                  |          |          |         |        | 2069.74) | 2123.91) |         |        | 1185.51) |          |         |        |         |         |         |        |
|                  |          |          |         |        | 1309.44  | 1360.67  | 0.14    |        | 671.63   | 1695.99  | 3.35    |        | 9.47    | 27.32   | 3.82    |        |
| Philippines      | (140.81, | (138.50, | (-0.08, | <0.001 | (1304.85 | (1357.26 | (0.10,  | <0.001 | (668.29, | (1692.15 | (2.74,  | <0.001 | (9.08,  | (26.83, | (3.09,  | <0.001 |
|                  | 143.84)  | 140.69)  | -0.05)  |        | ,        | ,        | 0.18)   |        | 674.98)  | ,        | 3.96)   |        | 9.88)   | 27.81)  | 4.55)   |        |
|                  |          |          |         |        | 1314.04) | 1364.09) |         |        |          | 1699.84) |         |        |         |         |         |        |

|                     |          |          |         |        |          |          |         |        |          |          |         |        |         |         |         |        |
|---------------------|----------|----------|---------|--------|----------|----------|---------|--------|----------|----------|---------|--------|---------|---------|---------|--------|
|                     | 88.41    | 79.61    | -0.35   |        | 1077.89  | 1067.07  | 0.00    |        | 1289.85  | 435.14   | -3.81   |        | 21.33   | 6.01    | -4.39   |        |
| Poland              | (86.92,  | (78.10,  | (-0.41, | <0.001 | (1072.62 | (1061.42 | (-0.19, | 0.993  | (1284.29 | (431.71, | (-4.45, | <0.001 | (20.63, | (5.63,  | (-5.19, | <0.001 |
|                     | 89.91)   | 81.14)   | -0.30)  |        | ,        | ,        | 0.19)   |        | ,        | 438.61)  | -3.15)  |        | 22.05)  | 6.42)   | -3.59)  |        |
|                     |          |          |         |        | 1083.19) | 1072.75) |         |        | 1295.42) |          |         |        |         |         |         |        |
| Portugal            | 61.55    | 51.55    | -0.61   |        | 739.22   | 702.06   | -0.12   |        | 763.89   | 262.05   | -3.69   |        | 12.09   | 3.55    | -4.23   |        |
|                     | (59.07,  | (49.07,  | (-0.64, | <0.001 | (730.55, | (692.80, | (-0.33, | 0.257  | (755.07, | (256.53, | (-4.22, | <0.001 | (11.01, | (2.94,  | (-4.88, | <0.001 |
|                     | 64.11)   | 54.13)   | -0.59)  |        | 747.96)  | 711.43)  | 0.09)   |        | 772.79)  | 267.66)  | -3.15)  |        | 13.26)  | 4.25)   | -3.58)  |        |
| Puerto Rico         | 110.96   | 121.09   | 0.31    |        | 1004.34  | 1051.81  | 0.16    |        | 710.42   | 399.07   | -1.90   |        | 11.41   | 5.96    | -2.14   |        |
|                     | (105.48, | (114.80, | (0.28,  | <0.001 | (987.74, | (1033.11 | (0.11,  | <0.001 | (696.42, | (387.63, | (-2.67, | <0.001 | (9.69,  | (4.64,  | (-3.03, | <0.001 |
|                     | 116.66)  | 127.64)  | 0.34)   |        | 1021.16) | ,        | 0.21)   |        | 724.64)  | 410.76)  | -1.12)  |        | 13.34)  | 7.55)   | -1.24)  |        |
|                     |          |          |         |        |          | 1070.77) |         |        |          |          |         |        |         |         |         |        |
| Qatar               | 101.90   | 92.27    | -0.32   |        | 1184.38  | 1085.20  | -0.30   |        | 853.22   | 392.77   | -2.52   |        | 12.83   | 5.15    | -3.00   |        |
|                     | (89.75,  | (87.62,  | (-0.37, | <0.001 | (1141.32 | (1068.44 | (-0.33, | <0.001 | (816.24, | (382.62, | (-3.07, | <0.001 | (8.73,  | (4.08,  | (-3.80, | <0.001 |
|                     | 115.68)  | 97.25)   | -0.27)  |        | ,        | ,        | -0.26)  |        | 891.82)  | 403.27)  | -1.96)  |        | 18.76)  | 6.62)   | -2.20)  |        |
|                     |          |          |         |        | 1229.04) | 1102.29) |         |        |          |          |         |        |         |         |         |        |
| Republic of Korea   | 97.54    | 88.74    | -0.33   |        | 784.47   | 759.88   | -0.08   |        | 1214.16  | 233.31   | -5.54   |        | 19.43   | 3.02    | -6.24   |        |
|                     | (96.19,  | (87.38,  | (-0.37, | <0.001 | (780.63, | (755.94, | (-0.16, | 0.058  | (1209.39 | (231.13, | (-5.95, | <0.001 | (18.83, | (2.78,  | (-6.74, | <0.001 |
|                     | 98.90)   | 90.11)   | -0.28)  |        | 788.32)  | 763.84)  | 0.00)   |        | ,        | 235.52)  | -5.13)  |        | 20.05)  | 3.27)   | -5.74)  |        |
|                     |          |          |         |        |          |          |         |        | 1218.95) |          |         |        |         |         |         |        |
| Republic of Moldova | 112.50   | 110.07   | -0.07   |        | 775.32   | 778.53   | 0.01    |        | 1014.95  | 715.55   | -1.20   |        | 16.47   | 11.36   | -1.28   |        |
|                     | (107.69, | (104.67, | (-0.09, | <0.001 | (762.67, | (764.17, | (-0.03, | 0.614  | (1000.44 | (702.00, | (-2.14, | 0.013  | (14.68, | (9.73,  | (-2.32, | 0.018  |
|                     | 117.48)  | 115.72)  | -0.06)  |        | 788.14)  | 793.14)  | 0.05)   |        | ,        | 729.34)  | -0.26)  |        | 18.44)  | 13.23)  | -0.23)  |        |
|                     |          |          |         |        |          |          |         |        | 1029.64) |          |         |        |         |         |         |        |
| Romania             | 90.73    | 96.32    | 0.19    |        | 803.93   | 887.39   | 0.38    |        | 1168.99  | 691.66   | -1.78   |        | 19.27   | 10.73   | -1.99   |        |
|                     | (88.74,  | (93.84,  | (0.14,  | <0.001 | (797.99, | (879.88, | (0.22,  | <0.001 | (1161.88 | (685.09, | (-2.54, | <0.001 | (18.37, | (9.94,  | (-2.86, | <0.001 |
|                     | 92.76)   | 98.85)   | 0.25)   |        | 809.91)  | 894.94)  | 0.54)   |        | ,        | 698.28)  | -1.01)  |        | 20.21)  | 11.58)  | -1.12)  |        |
|                     |          |          |         |        |          |          |         |        | 1176.15) |          |         |        |         |         |         |        |
| Russian Federation  | 118.82   | 126.02   | 0.20    |        | 828.93   | 901.98   | 0.31    |        | 1436.19  | 1764.00  | 0.64    |        | 24.10   | 29.95   | 0.69    |        |
|                     | (117.96, | (125.06, | (0.18,  | <0.001 | (826.66, | (899.40, | (0.26,  | <0.001 | (1433.24 | (1760.52 | (-0.60, | 0.312  | (23.72, | (29.51, | (-0.57, | 0.285  |
|                     | 119.68)  | 126.99)  | 0.22)   |        | 831.21)  | 904.56)  | 0.36)   |        | ,        | ,        | 1.89)   |        | 24.48)  | 30.40)  | 1.97)   |        |
|                     |          |          |         |        |          |          |         |        | 1439.14) | 1767.48) |         |        |         |         |         |        |
| Rwanda              | 210.76   | 169.88   | -0.75   |        | 2905.40  | 2832.07  | -0.07   |        | 1812.81  | 825.67   | -2.69   |        | 28.01   | 11.23   | -3.12   |        |
|                     | (205.24, | (166.42, | (-0.77, | <0.001 | (2884.76 | (2817.74 | (-0.14, | 0.059  | (1796.08 | (817.81, | (-2.97, | <0.001 | (25.95, | (10.32, | (-3.40, | <0.001 |

|                                  |          |          |         |        |          |          |         |        |          |          |         |        |         |         |         |        |
|----------------------------------|----------|----------|---------|--------|----------|----------|---------|--------|----------|----------|---------|--------|---------|---------|---------|--------|
|                                  | 216.40)  | 173.40)  | -0.72)  |        | ,        | ,        | 0.00)   |        | ,        | 833.59)  | -2.41)  |        | 30.21)  | 12.20)  | -2.84)  |        |
|                                  |          |          |         |        | 2926.17) | 2846.47) |         |        | 1829.67) |          |         |        |         |         |         |        |
|                                  |          |          |         |        |          |          |         |        | 1925.90  |          |         |        |         |         |         |        |
| Saint Kitts and Nevis            | 134.30   | 117.23   | -0.47   |        | 1128.38  | 1054.71  | -0.22   |        | (1716.16 | 550.61   | -4.06   |        | 33.00   | 8.34    | -4.49   |        |
|                                  | (83.91,  | (77.60,  | (-0.51, | <0.001 | (971.19, | (927.14, | (-0.32, | <0.001 | (459.44, | (-5.07,  | <0.001  |        | (11.01, | (0.98,  | (-5.63, | <0.001 |
|                                  | 204.99)  | 170.93)  | -0.43)  |        | 1304.72) | 1195.69) | -0.12)  |        | ,        | 655.35)  | -3.04)  |        | 77.09)  | 32.17)  | -3.34)  |        |
|                                  |          |          |         |        |          |          |         |        | 2154.95) |          |         |        |         |         |         |        |
|                                  |          |          |         |        | 2533.16  | 2481.47  | -0.07   |        | 1261.67  | 784.93   | -1.59   |        | 19.79   | 11.36   | -1.86   |        |
| Saint Lucia                      | 194.04   | 192.46   | -0.03   |        | (2397.21 | (2364.51 | (-0.10, | <0.001 | (1162.45 | (720.22, | (-1.92, | <0.001 | (9.09,  | (4.87,  | (-2.27, | <0.001 |
|                                  | (157.81, | (160.89, | (-0.04, | <0.001 | ,        | ,        |         |        | ,        |          |         |        |         |         |         |        |
|                                  | 236.84)  | 228.60)  | -0.02)  |        | 2675.44) | 2602.89) | -0.04)  |        | 1367.57) | 854.10)  | -1.25)  |        | 38.10)  | 22.82)  | -1.45)  |        |
|                                  |          |          |         |        |          |          |         |        |          |          |         |        |         |         |         |        |
|                                  |          |          |         |        | 2478.29  | 2521.68  | 0.06    |        | 1423.83  | 951.00   | -1.29   |        | 22.60   | 14.21   | -1.48   |        |
| Saint Vincent and the Grenadines | 184.61   | 186.69   | 0.04    |        | (2330.31 | (2372.00 | (0.03,  | 0.001  | (1307.55 | (860.06, | (-2.29, | 0.012  | (10.07, | (5.21,  | (-2.43, | 0.002  |
|                                  | (145.89, | (147.64, | (0.03,  | <0.001 | ,        | ,        |         |        | ,        |          |         |        |         |         |         |        |
|                                  | 231.51)  | 233.02)  | 0.05)   |        | 2634.11) | 2678.43) | 0.10)   |        | 1548.35) | 1049.06) | -0.28)  |        | 44.63)  | 31.17)  | -0.52)  |        |
|                                  |          |          |         |        |          |          |         |        |          |          |         |        |         |         |         |        |
|                                  |          |          |         |        | 1792.39  | 1800.87  | 0.04    |        | 2185.99  | 2328.47  | 0.23    |        | 35.25   | 37.77   | 0.25    |        |
| Samoa                            | 156.06   | 151.61   | -0.10   |        | (1684.51 | (1707.38 | (-0.04, | 0.376  | (2061.79 | (2219.10 | (0.15,  | <0.001 | (20.95, | (24.93, | (0.22,  | <0.001 |
|                                  | (125.06, | (125.17, | (-0.11, | <0.001 | ,        | ,        |         |        | ,        | ,        |         |        |         |         |         |        |
|                                  | 193.05)  | 182.25)  | -0.08)  |        | 1905.95) | 1898.41) | 0.11)   |        | 2316.15) | 2442.01) | 0.30)   |        | 56.16)  | 55.11)  | 0.29)   |        |
|                                  |          |          |         |        |          |          |         |        |          |          |         |        |         |         |         |        |
|                                  |          |          |         |        | 1135.03  | 1126.04  | -0.03   |        | 336.62   | 307.23   | -0.32   |        | 4.42    | 3.96    | -0.38   |        |
| San Marino                       | 70.11    | 66.45    | -0.18   |        | (925.33, | (931.66, | (-0.05, | 0.021  | (226.82, | (210.95, | (-0.41, | <0.001 | (0.00,  | (0.00,  | (-0.54, | <0.001 |
|                                  | (26.37,  | (26.70,  | (-0.20, | <0.001 | 1378.93) | 1350.31) | -0.00)  |        | 481.86)  | 434.07)  | -0.22)  |        | 52.39)  | 46.58)  | -0.22)  |        |
|                                  | 151.61)  | 139.09)  | -0.16)  |        |          |          |         |        |          |          |         |        |         |         |         |        |
|                                  |          |          |         |        | 3248.35  | 3564.50  | 0.33    |        | 1110.10  | 1140.85  | 0.13    |        | 15.74   | 15.53   | 0.03    |        |
| Sao Tome and Principe            | 168.52   | 172.31   | 0.07    |        | (3071.38 | (3438.83 | (0.31,  | <0.001 | (1000.62 | (1069.10 | (-0.39, | 0.623  | (5.16,  | (8.17,  | (-0.58, | 0.925  |
|                                  | (129.46, | (145.41, | (0.06,  | <0.001 | ,        | ,        |         |        | ,        | ,        |         |        |         |         |         |        |
|                                  | 217.03)  | 202.92)  | 0.09)   |        | 3434.07) | 3693.76) | 0.34)   |        | 1229.13) | 1216.29) | 0.66)   |        | 37.77)  | 26.96)  | 0.65)   |        |
|                                  |          |          |         |        |          |          |         |        |          |          |         |        |         |         |         |        |
|                                  |          |          |         |        | 1147.69  | 1243.98  | 0.43    |        | 1116.90  | 973.59   | -0.47   |        | 17.57   | 15.06   | -0.53   |        |
| Saudi Arabia                     | 84.52    | 97.54    | 0.50    |        | (1139.31 | (1238.98 | (0.03,  | 0.037  | (1108.52 | (969.29, | (-0.66, | <0.001 | (16.52, | (14.54, | (-0.84, | 0.001  |
|                                  | (82.23,  | (96.17,  | (0.47,  | <0.001 | ,        | ,        |         |        | ,        |          |         |        |         |         |         |        |
|                                  | 86.85)   | 98.94)   | 0.53)   |        | 1156.13) | 1249.01) | 0.83)   |        | 1125.32) | 977.90)  | -0.28)  |        | 18.66)  | 15.60)  | -0.22)  |        |
|                                  |          |          |         |        |          |          |         |        |          |          |         |        |         |         |         |        |
|                                  |          |          |         |        | 2499.59  | 2540.57  | 0.07    |        | 1024.90  | 851.46   | -0.50   |        | 14.81   | 11.83   | -0.61   |        |
| Senegal                          | 154.99   | 151.86   | -0.07   |        | (2480.23 | (2527.63 | (0.02,  | 0.009  | (1012.11 | (843.78, | (-0.67, | <0.001 | (13.29, | (10.92, | (-0.81, | <0.001 |
|                                  | (150.19, | (148.71, | (-0.09, | <0.001 | ,        | ,        |         |        | ,        |          |         |        |         |         |         |        |
|                                  | 159.92)  | 155.07)  | -0.06)  |        | 2519.06) | 2553.56) | 0.12)   |        | 1037.82) | 859.20)  | -0.33)  |        | 16.48)  | 12.79)  | -0.41)  |        |

|                 |          |          |         |        |          |          |         |        |          |          |         |        |         |         |         |        |
|-----------------|----------|----------|---------|--------|----------|----------|---------|--------|----------|----------|---------|--------|---------|---------|---------|--------|
|                 | 104.78   | 103.22   | -0.05   |        | 990.04   | 1035.15  | 0.20    |        | 1078.59  | 505.81   | -2.56   |        | 17.37   | 7.26    | -2.96   |        |
| Serbia          | (101.45, | (99.60,  | (-0.07, | <0.001 | (979.73, | (1023.59 | (-0.01, | 0.061  | (1067.91 | (497.84, | (-2.89, | <0.001 | (16.04, | (6.35,  | (-3.38, | <0.001 |
|                 | 108.20)  | 106.95)  | -0.03)  |        | 1000.44) | ,        | 0.42)   |        | ,        | 513.88)  | -2.22)  |        | 18.78)  | 8.29)   | -2.54)  |        |
|                 |          |          |         |        |          | 1046.83) |         |        | 1089.36) |          |         |        |         |         |         |        |
|                 | 124.64   | 119.32   | -0.14   |        | 1668.52  | 1602.96  | -0.13   |        | 1694.01  | 1104.73  | -1.38   |        | 27.27   | 16.76   | -1.58   |        |
| Seychelles      | (87.45,  | (87.61,  | (-0.17, | <0.001 | (1524.20 | (1480.03 | (-0.17, | <0.001 | (1543.55 | (1005.10 | (-1.97, | <0.001 | (11.24, | (6.71,  | (-2.27, | <0.001 |
|                 | 173.63)  | 159.58)  | -0.12)  |        | ,        | ,        | -0.09)  |        | ,        | ,        | -0.78)  |        | 56.55)  | 36.04)  | -0.88)  |        |
|                 |          |          |         |        | 1823.91) | 1734.04) |         |        | 1855.98) | 1212.35) |         |        |         |         |         |        |
|                 | 166.54   | 172.30   | 0.12    |        | 2685.76  | 2838.32  | 0.20    |        | 1109.85  | 1143.57  | 0.14    |        | 16.10   | 16.58   | 0.15    |        |
| Sierra Leone    | (159.63, | (167.84, | (0.11,  | <0.001 | (2657.90 | (2820.26 | (0.17,  | <0.001 | (1091.56 | (1131.74 | (-0.01, | 0.061  | (13.94, | (15.16, | (-0.03, | 0.110  |
|                 | 173.69)  | 176.85)  | 0.13)   |        | ,        | ,        | 0.23)   |        | ,        | ,        | 0.30)   |        | 18.51)  | 18.10)  | 0.33)   |        |
|                 |          |          |         |        | 2713.86) | 2856.48) |         |        | 1128.37) | 1155.49) |         |        |         |         |         |        |
|                 | 106.33   | 104.48   | -0.05   |        | 803.47   | 781.91   | -0.08   |        | 697.02   | 273.84   | -3.13   |        | 11.03   | 3.76    | -3.61   |        |
| Singapore       | (101.24, | (100.29, | (-0.12, | 0.121  | (789.38, | (770.86, | (-0.15, | 0.028  | (683.88, | (267.05, | (-3.87, | <0.001 | (9.44,  | (3.02,  | (-4.53, | <0.001 |
|                 | 111.63)  | 108.84)  | 0.01)   |        | 817.76)  | 793.12)  | -0.01)  |        | 710.36)  | 280.80)  | -2.38)  |        | 12.84)  | 4.68)   | -2.68)  |        |
|                 |          |          |         |        | 1181.23  | 1141.13  | -0.10   |        | 978.55   | 461.47   | -2.63   |        | 15.54   | 6.39    | -3.14   |        |
| Slovakia        | (89.01,  | (84.04,  | (-0.22, | <0.001 | (1166.53 | (1125.67 | (-0.14, | <0.001 | (965.47, | (452.02, | (-3.25, | <0.001 | (13.94, | (5.35,  | (-3.91, | <0.001 |
|                 | 97.27)   | 92.55)   | -0.16)  |        | ,        | ,        | -0.06)  |        | 991.77)  | 471.10)  | -2.01)  |        | 17.28)  | 7.62)   | -2.35)  |        |
|                 |          |          |         |        | 1196.06) | 1156.78) |         |        |          |          |         |        |         |         |         |        |
|                 | 87.96    | 89.56    | 0.06    |        | 943.53   | 919.82   | -0.08   |        | 600.06   | 215.56   | -3.52   |        | 9.21    | 2.48    | -4.51   |        |
| Slovenia        | (81.59,  | (82.36,  | (0.04,  | <0.001 | (922.31, | (896.25, | (-0.13, | <0.001 | (583.45, | (204.41, | (-3.79, | <0.001 | (7.27,  | (1.45,  | (-4.88, | <0.001 |
|                 | 94.72)   | 97.30)   | 0.08)   |        | 965.15)  | 943.94)  | -0.04)  |        | 617.06)  | 227.26)  | -3.24)  |        | 11.55)  | 4.12)   | -4.13)  |        |
|                 |          |          |         |        | 1603.58  | 1577.16  | -0.04   |        | 5499.40  | 5516.29  | 0.01    |        | 94.80   | 95.18   | 0.01    |        |
| Solomon Islands | (161.13, | (157.61, | (-0.25, | <0.001 | (1529.74 | (1528.34 | (-0.14, | 0.419  | (5355.22 | (5422.58 | (-0.12, | 0.902  | (76.55, | (83.17, | (-0.12, | 0.883  |
|                 | 214.32)  | 191.02)  | -0.23)  |        | ,        | ,        | 0.06)   |        | ,        | ,        | 0.14)   |        | 116.27) | 108.45) | 0.14)   |        |
|                 |          |          |         |        | 1680.34) | 1627.19) |         |        | 5646.65) | 5611.23) |         |        |         |         |         |        |
|                 | 208.73   | 206.51   | -0.04   |        | 2880.03  | 2993.59  | 0.13    |        | 1546.75  | 1291.05  | -0.60   |        | 23.69   | 19.12   | -0.73   |        |
| Somalia         | (203.05, | (203.26, | (-0.05, | <0.001 | (2858.58 | (2981.05 | (0.08,  | <0.001 | (1530.88 | (1282.54 | (-0.72, | <0.001 | (21.75, | (18.09, | (-0.88, | <0.001 |
|                 | 214.54)  | 209.79)  | -0.03)  |        | ,        | ,        | 0.19)   |        | ,        | ,        | -0.48)  |        | 25.75)  | 20.21)  | -0.57)  |        |
|                 |          |          |         |        | 2901.60) | 3006.17) |         |        | 1562.75) | 1299.60) |         |        |         |         |         |        |
|                 | 192.91   | 177.86   | -0.28   |        | 2707.83  | 2661.58  | -0.05   |        | 1579.57  | 772.75   | -2.40   |        | 24.78   | 10.66   | -2.78   |        |
| South Africa    | (190.72, | (176.16, | (-0.30, | <0.001 | (2699.60 | (2655.04 | (-0.09, | 0.012  | (1573.04 | (769.29, | (-3.64, | <0.001 | (23.96, | (10.26, | (-4.18, | <0.001 |
|                 | 195.12)  | 179.56)  | -0.26)  |        | ,        | ,        | -0.01)  |        | ,        | 776.23)  | -1.14)  |        | 25.63)  | 11.07)  | -1.36)  |        |

|                            |          |          |         |        |          |          |         |        |          |          |         |        |         |         |         |        |
|----------------------------|----------|----------|---------|--------|----------|----------|---------|--------|----------|----------|---------|--------|---------|---------|---------|--------|
|                            |          |          |         |        | 2716.08) | 2668.14) |         |        | 1586.12) |          |         |        |         |         |         |        |
|                            |          |          |         |        | 2755.24  | 2911.89  |         |        |          |          |         |        |         |         |         |        |
|                            | 161.75   | 160.89   | -0.02   |        |          |          |         |        |          |          |         |        |         |         |         |        |
| South Sudan                | (156.43, | (156.53, | (-0.03, | 0.025  | (2732.95 | (2892.89 | 0.20    | <0.001 | (955.08, | (742.72, | (-1.15, | <0.001 | (12.14, | (8.71,  | (-1.59, | <0.001 |
|                            | 167.23)  | 165.36)  | -0.00)  |        | ,        | ,        | 0.27)   |        | 982.82)  | 762.53)  | -0.47)  |        | 15.59)  | 11.05)  | -0.72)  |        |
|                            |          |          |         |        | 2777.68) | 2931.00) |         |        |          |          |         |        |         |         |         |        |
|                            | 75.64    | 68.01    | -0.35   |        | 676.08   | 659.27   | -0.06   |        | 686.43   | 262.93   | -3.38   |        | 10.78   | 3.62    | -3.85   |        |
| Spain                      | (74.24,  | (66.63,  | (-0.45, | <0.001 | (671.86, | (654.93, | (-0.17, | 0.238  | (682.18, | (260.23, | (-3.65, | <0.001 | (10.25, | (3.32,  | (-4.17, | <0.001 |
|                            | 77.07)   | 69.42)   | -0.26)  |        | 680.32)  | 663.63)  | 0.04)   |        | 690.70)  | 265.65)  | -3.12)  |        | 11.33)  | 3.95)   | -3.53)  |        |
|                            |          |          |         |        |          |          |         |        |          |          |         |        |         |         |         |        |
|                            | 73.85    | 71.80    | -0.09   |        | 730.30   | 727.85   | 0.03    |        | 1347.16  | 764.83   | -1.85   |        | 21.67   | 11.60   | -2.04   |        |
| Sri Lanka                  | (71.88,  | (69.97,  | (-0.10, | <0.001 | (724.06, | (722.01, | (-0.16, | 0.771  | (1338.67 | (758.85, | (-3.13, | 0.006  | (20.61, | (10.87, | (-3.43, | 0.005  |
|                            | 75.87)   | 73.66)   | -0.07)  |        | 736.59)  | 733.72)  | 0.22)   |        | ,        | 770.83)  | -0.55)  |        | 22.79)  | 12.35)  | -0.63)  |        |
|                            |          |          |         |        |          |          |         |        | 1355.69) |          |         |        |         |         |         |        |
|                            | 157.57   | 158.53   | 0.02    |        | 1789.64  | 1899.79  | 0.23    |        | 2466.08  | 1549.74  | -1.58   |        | 40.71   | 24.44   | -1.73   |        |
| Sudan                      | (154.62, | (156.59, | (0.00,  | 0.022  | (1779.69 | (1893.08 | (0.09,  | 0.001  | (2454.09 | (1543.59 | (-1.67, | <0.001 | (39.16, | (23.67, | (-1.79, | <0.001 |
|                            | 160.56)  | 160.48)  | 0.05)   |        | ,        | ,        | 0.36)   |        | ,        | ,        | -1.49)  |        | 42.30)  | 25.24)  | -1.68)  |        |
|                            |          |          |         |        | 1799.64) | 1906.51) |         |        | 2478.12) | 1555.92) |         |        |         |         |         |        |
|                            | 187.84   | 193.25   | 0.09    |        | 2128.87  | 2197.95  | 0.12    |        | 1462.86  | 1063.39  | -1.01   |        | 23.63   | 16.57   | -1.13   |        |
| Suriname                   | (166.48, | (175.11, | (0.05,  | <0.001 | (2055.23 | (2135.73 | (0.06,  | <0.001 | (1399.70 | (1020.31 | (-2.41, | 0.160  | (16.13, | (11.59, | (-2.69, | 0.162  |
|                            | 211.41)  | 212.78)  | 0.13)   |        | ,        | ,        | 0.19)   |        | ,        | ,        | 0.40)   |        | 33.60)  | 22.99)  | 0.46)   |        |
|                            |          |          |         |        | 2204.69) | 2261.55) |         |        | 1528.29) | 1107.84) |         |        |         |         |         |        |
|                            | 79.32    | 87.14    | 0.33    |        | 1004.98  | 961.24   | -0.09   |        | 449.89   | 229.68   | -2.24   |        | 6.32    | 2.40    | -3.26   |        |
| Sweden                     | (76.17,  | (83.99,  | (0.31,  | <0.001 | (993.64, | (950.67, | (-0.24, | 0.288  | (442.37, | (224.53, | (-2.42, | <0.001 | (5.46,  | (1.90,  | (-3.50, | <0.001 |
|                            | 82.56)   | 90.39)   | 0.34)   |        | 1016.43) | 971.89)  | 0.07)   |        | 457.52)  | 234.92)  | -2.06)  |        | 7.28)   | 2.99)   | -3.02)  |        |
|                            |          |          |         |        |          |          |         |        |          |          |         |        |         |         |         |        |
|                            | 65.35    | 61.06    | -0.23   |        | 624.98   | 590.04   | -0.15   |        | 431.25   | 159.37   | -3.44   |        | 6.57    | 1.94    | -4.22   |        |
| Switzerland                | (62.36,  | (58.26,  | (-0.25, | <0.001 | (615.68, | (581.32, | (-0.36, | 0.144  | (423.53, | (154.88, | (-3.84, | <0.001 | (5.66,  | (1.48,  | (-4.76, | <0.001 |
|                            | 68.47)   | 63.97)   | -0.21)  |        | 634.39)  | 598.87)  | 0.05)   |        | 439.09)  | 163.98)  | -3.04)  |        | 7.62)   | 2.52)   | -3.67)  |        |
|                            |          |          |         |        |          |          |         |        |          |          |         |        |         |         |         |        |
|                            | 160.56   | 142.96   | -0.40   |        | 1973.35  | 1988.35  | 0.04    |        | 3543.66  | 1814.37  | -2.25   |        | 57.64   | 28.32   | -2.38   |        |
| Syrian Arab Republic       | (156.74, | (139.54, | (-0.44, | <0.001 | (1959.83 | (1975.46 | (0.01,  | 0.018  | (3525.45 | (1802.06 | (-2.64, | <0.001 | (55.31, | (26.79, | (-2.82, | <0.001 |
|                            | 164.46)  | 146.45)  | -0.36)  |        | ,        | ,        | 0.07)   |        | ,        | ,        | -1.85)  |        | 60.05)  | 29.92)  | -1.95)  |        |
|                            |          |          |         |        | 1986.95) | 2001.30) |         |        | 3561.93) | 1826.76) |         |        |         |         |         |        |
|                            | 72.36    | 75.74    | 0.17    |        | 829.27   | 899.67   | 0.28    |        | 639.16   | 450.52   | -1.24   |        | 9.41    | 6.25    | -1.45   |        |
| Taiwan (Province of China) | (70.65,  | (73.88,  | (0.12,  | <0.001 | (823.45, | (893.31, | (0.21,  | <0.001 | (634.04, | (446.09, | (-1.79, | <0.001 | (8.80,  | (5.74,  | (-2.11, | <0.001 |
|                            | 74.11)   | 77.63)   | 0.21)   |        | 835.13)  | 906.07)  | 0.35)   |        | 644.30)  | 454.99)  | -0.69)  |        | 10.05)  | 6.79)   | -0.78)  |        |

|                     |          |          |         |        |          |          |         |        |          |           |         |        |         |         |         |        |
|---------------------|----------|----------|---------|--------|----------|----------|---------|--------|----------|-----------|---------|--------|---------|---------|---------|--------|
|                     | 156.07   | 154.40   | -0.03   |        | 1668.00  | 1669.76  | 0.00    |        | 1304.56  | 980.41    | -0.89   |        | 21.05   | 15.45   | -0.97   |        |
| Tajikistan          | (150.57, | (150.56, | (-0.05, | <0.001 | (1649.77 | (1657.07 | (-0.03, | 0.820  | (1287.75 | (970.52,  | (-1.32, | <0.001 | (18.94, | (14.22, | (-1.43, | <0.001 |
|                     | 161.74)  | 158.31)  | -0.02)  |        | ,        | ,        | 0.04)   |        | ,        | 990.38)   | -0.47)  |        | 23.35)  | 16.75)  | -0.51)  |        |
|                     |          |          |         |        | 1686.40) | 1682.54) |         |        | 1321.55) |           |         |        |         |         |         |        |
|                     |          |          |         |        | 1443.66  | 1414.69  | -0.06   |        | 1003.55  | 927.19    | -0.12   |        | 15.31   | 13.96   | -0.16   |        |
| Thailand            | (117.39, | (113.78, | (-0.12, | <0.001 | (1438.97 | (1409.99 | (-0.09, | <0.001 | (999.58, | (923.46,  | (-1.28, | 0.838  | (14.82, | (13.51, | (-1.46, | 0.814  |
|                     | 120.09)  | 116.46)  | -0.10)  |        | ,        | ,        | -0.03)  |        | 1007.53) | 930.93)   | 1.05)   |        | 15.81)  | 14.42)  | 1.16)   |        |
|                     |          |          |         |        | 1448.37) | 1419.39) |         |        |          |           |         |        |         |         |         |        |
|                     |          |          |         |        | 1451.23  | 1488.72  | 0.10    |        | 945.04   | 1135.45   | 0.69    |        | 14.09   | 17.17   | 0.71    |        |
| Timor-Leste         | (124.18, | (123.11, | (-0.10, | <0.001 | (1408.55 | (1453.73 | (0.02,  | 0.013  | (910.03, | (1104.14  | (0.07,  | 0.029  | (10.07, | (13.46, | (0.10,  | 0.022  |
|                     | 151.00)  | 144.39)  | -0.09)  |        | ,        | ,        | 0.18)   |        | 981.11)  | ,         | 1.32)   |        | 19.23)  | 21.65)  | 1.32)   |        |
|                     |          |          |         |        | 1494.96) | 1524.43) |         |        |          | 1167.48)  |         |        |         |         |         |        |
|                     |          |          |         |        | 2617.51  | 2724.60  | 0.14    |        | 1204.64  | 1064.64   | -0.41   |        | 17.80   | 15.39   | -0.48   |        |
| Togo                | (153.47, | (156.46, | (0.00,  | 0.034  | (2589.58 | (2706.33 | (0.09,  | <0.001 | (1184.99 | (1053.00  | (-0.68, | 0.003  | (15.45, | (14.00, | (-0.77, | 0.002  |
|                     | 167.54)  | 165.41)  | 0.02)   |        | ,        | ,        | 0.20)   |        | ,        | ,         | -0.14)  |        | 20.44)  | 16.87)  | -0.18)  |        |
|                     |          |          |         |        | 2645.70) | 2742.97) |         |        | 1224.56) | 1076.38)  |         |        |         |         |         |        |
|                     |          |          |         |        | 118.90   | 109.81   | -0.27   |        | 2360.51  | 2105.61   | -0.39   |        | 39.03   | 34.66   | -0.40   |        |
| Tokelau             | (0.47,   | (0.12,   | (-0.28, | <0.001 | 1021.58  | 1008.25  | (-0.09, | 0.066  | (1237.11 | (993.22,  | (-0.42, | <0.001 | (0.00,  | (0.00,  | (-0.44, | <0.001 |
|                     | 1030.81  | 1090.92  | -0.27)  |        | (354.93, | (310.30, | 0.00)   |        | ,        | (3953.16) | -0.36)  |        | 892.80) | 954.30) | -0.37)  |        |
|                     | )        | )        |         |        | 2369.07) | 2470.64) |         |        | 4136.90) |           |         |        |         |         |         |        |
|                     |          |          |         |        | 2198.54  | 2235.71  | 0.07    |        | 1117.49  | 1144.27   | 0.11    |        | 16.51   | 16.79   | 0.07    |        |
| Tonga               | (103.87, | (104.67, | (-0.16, | 0.602  | (2039.40 | (2085.46 | (-0.02, | 0.130  | (998.28, | (1035.01  | (-0.06, | 0.204  | (5.00,  | (6.02,  | (-0.08, | 0.383  |
|                     | 192.45)  | 185.18)  | 0.10)   |        | ,        | ,        | 0.17)   |        | 1247.83) | ,         | 0.28)   |        | 41.26)  | 37.36)  | 0.22)   |        |
|                     |          |          |         |        | 2368.00) | 2394.30) |         |        |          | 1262.18)  |         |        |         |         |         |        |
|                     |          |          |         |        | 2435.62  | 2422.95  | -0.01   |        | 1325.18  | 878.53    | -1.44   |        | 20.93   | 13.11   | -1.63   |        |
| Trinidad and Tobago | (189.79, | (183.13, | (-0.14, | <0.001 | (2392.20 | (2380.76 | (-0.03, | 0.387  | (1292.89 | (853.87,  | (-2.17, | <0.001 | (17.03, | (10.30, | (-2.46, | <0.001 |
|                     | 215.12)  | 207.52)  | -0.11)  |        | ,        | ,        | 0.01)   |        | ,        | 903.78)   | -0.70)  |        | 25.47)  | 16.55)  | -0.80)  |        |
|                     |          |          |         |        | 2479.65) | 2465.76) |         |        | 1358.09) |           |         |        |         |         |         |        |
|                     |          |          |         |        | 940.57   | 1059.14  | 0.39    |        | 1007.22  | 756.80    | -0.97   |        | 16.24   | 11.66   | -1.13   |        |
| Tunisia             | (77.75,  | (81.14,  | (0.09,  | <0.001 | (929.85, | (1049.73 | (0.32,  | <0.001 | (995.95, | (748.97,  | (-1.16, | <0.001 | (14.82, | (10.72, | (-1.31, | <0.001 |
|                     | 84.16)   | 86.41)   | 0.18)   |        | 951.39)  | ,        | 0.46)   |        | 1018.59) | 764.70)   | -0.78)  |        | 17.76)  | 12.67)  | -0.96)  |        |
|                     |          |          |         |        |          | 1068.61) |         |        |          |           |         |        |         |         |         |        |
| Turkey              | 83.76    | 71.63    | -0.54   | <0.001 | 1256.77  | 1123.25  | -0.38   | <0.001 | 1088.51  | 478.06    | -2.79   | <0.001 | 17.28   | 6.61    | -3.23   | <0.001 |



|                    |          |          |         |        |          |          |         |        |          |          |         |         |         |         |         |        |
|--------------------|----------|----------|---------|--------|----------|----------|---------|--------|----------|----------|---------|---------|---------|---------|---------|--------|
|                    | (82.58,  | (70.75,  | (-0.61, |        | (1252.19 | (1119.73 | (-0.44, |        | (1084.17 | (475.78, | (-3.11, | (16.74, | (6.34,  | (-3.58, |         |        |
|                    | 84.96)   | 72.52)   | -0.47)  |        | ,        | ,        | -0.33)  |        | ,        | 480.35)  | -2.47)  | 17.84)  | 6.88)   | -2.89)  |         |        |
|                    |          |          |         |        | 1261.37) | 1126.78) |         |        | 1092.85) |          |         |         |         |         |         |        |
|                    | 160.20   | 177.21   | 0.36    |        | 1747.83  | 1846.19  | 0.19    |        | 2069.95  | 2157.21  | 0.18    | 33.96   | 34.99   | 0.14    |         |        |
| Turkmenistan       | (153.75, | (171.48, | (0.33,  | <0.001 | (1726.32 | (1827.60 | (0.14,  | <0.001 | (2045.94 | (2137.17 | (-0.72, | 0.701   | (30.92, | (32.48, | (-0.81, | 0.776  |
|                    | 166.87)  | 183.08)  | 0.39)   |        | ,        | ,        | 0.23)   |        | ,        | ,        | 1.09)   |         | 37.24)  | 37.65)  | 1.09)   |        |
|                    |          |          |         |        | 1769.57) | 1864.92) |         |        | 2094.20) | 2177.39) |         |         |         |         |         |        |
|                    | 139.17   | 119.37   | -0.53   |        | 1028.27  | 970.56   | -0.18   |        | 3463.11  | 3280.12  | -0.18   | 58.20   | 55.54   | -0.16   |         |        |
| Tuvalu             | (44.72,  | (40.88,  | (-0.54, | <0.001 | (721.58, | (705.19, | (-0.22, | <0.001 | (2876.54 | (2770.50 | (-0.27, | <0.001  | (7.31,  | (9.04,  | (-0.25, | 0.001  |
|                    | 328.97)  | 274.65)  | -0.52)  |        | 1422.84) | 1305.94) | -0.14)  |        | ,        | ,        | -0.10)  |         | 209.92) | 183.41) | -0.07)  |        |
|                    |          |          |         |        |          |          |         |        | 4135.45) | 3858.58) |         |         |         |         |         |        |
|                    | 190.44   | 180.26   | -0.19   |        | 3012.35  | 3240.03  | 0.28    |        | 881.98   | 907.31   | 0.09    | 12.05   | 12.22   | -0.01   |         |        |
| Uganda             | (186.97, | (178.15, | (-0.21, | <0.001 | (2998.33 | (3230.93 | (0.17,  | <0.001 | (874.03, | (902.28, | (-0.19, | 0.522   | (11.11, | (11.63, | (-0.37, | 0.938  |
|                    | 193.96)  | 182.39)  | -0.17)  |        | ,        | ,        | 0.38)   |        | 889.99)  | 912.36)  | 0.38)   |         | 13.05)  | 12.84)  | 0.34)   |        |
|                    |          |          |         |        | 3026.42) | 3249.15) |         |        |          |          |         |         |         |         |         |        |
|                    | 111.19   | 126.84   | 0.46    |        | 840.41   | 938.56   | 0.39    |        | 1143.19  | 2214.82  | 2.21    | 18.72   | 37.54   | 2.47    |         |        |
| Ukraine            | (109.73, | (125.09, | (0.36,  | <0.001 | (836.39, | (933.77, | (0.34,  | <0.001 | (1138.55 | (2207.68 | (-0.05, | 0.056   | (18.13, | (36.63, | (1.08,  | <0.001 |
|                    | 112.67)  | 128.62)  | 0.56)   |        | 844.44)  | 943.38)  | 0.44)   |        | ,        | ,        | 4.53)   |         | 19.32)  | 38.47)  | 3.87)   |        |
|                    |          |          |         |        |          |          |         |        | 1147.86) | 2221.98) |         |         |         |         |         |        |
|                    | 136.74   | 141.96   | 0.13    |        | 1590.56  | 1617.26  | 0.10    |        | 1107.44  | 874.74   | -0.84   | 16.98   | 13.11   | -0.92   |         |        |
| United Arab        | (129.39, | (137.73, | (0.10,  | <0.001 | (1565.46 | (1603.01 | (-0.01, | 0.067  | (1086.58 | (865.09, | (-1.11, | <0.001  | (14.53, | (12.02, | (-1.22, | <0.001 |
| Emirates           | 144.47)  | 146.31)  | 0.16)   |        | ,        | ,        | 0.21)   |        | ,        | 884.51)  | -0.56)  |         | 19.84)  | 14.32)  | -0.62)  |        |
|                    |          |          |         |        | 1616.05) | 1631.63) |         |        | 1128.68) |          |         |         |         |         |         |        |
|                    | 82.91    | 78.35    | -0.19   |        | 867.87   | 871.26   | 0.01    |        | 539.39   | 360.96   | -1.32   | 8.34    | 5.26    | -1.57   |         |        |
| United Kingdom     | (81.69,  | (77.21,  | (-0.26, | <0.001 | (863.91, | (867.43, | (-0.02, | 0.511  | (536.26, | (358.53, | (-1.64, | <0.001  | (7.96,  | (4.97,  | (-2.00, | <0.001 |
|                    | 84.15)   | 79.51)   | -0.12)  |        | 871.85)  | 875.11)  | 0.04)   |        | 542.53)  | 363.40)  | -1.00)  |         | 8.74)   | 5.56)   | -1.14)  |        |
|                    |          |          |         |        |          |          |         |        |          |          |         |         |         |         |         |        |
|                    | 174.47   | 178.38   | 0.08    |        | 2820.17  | 3043.45  | 0.28    |        | 1085.33  | 868.64   | -0.73   | 15.64   | 11.67   | -0.96   |         |        |
| United Republic of | (171.79, | (176.61, | (0.06,  | <0.001 | (2809.21 | (3036.02 | (0.20,  | <0.001 | (1078.28 | (864.57, | (-0.80, | <0.001  | (14.79, | (11.19, | (-1.04, | <0.001 |
| Tanzania           | 177.19)  | 180.17)  | 0.10)   |        | ,        | ,        | 0.37)   |        | ,        | 872.72)  | -0.66)  |         | 16.53)  | 12.16)  | -0.88)  |        |
|                    |          |          |         |        | 2831.16) | 3050.90) |         |        | 1092.41) |          |         |         |         |         |         |        |
|                    | 142.07   | 142.09   | -0.02   |        | 1652.45  | 1634.76  | -0.01   |        | 671.81   | 564.66   | -0.57   | 10.00   | 8.02    | -0.76   |         |        |
| United States of   | (141.35, | (141.40, | (-0.07, | 0.525  | (1650.02 | (1632.42 | (-0.29, | 0.935  | (670.26, | (563.28, | (-0.85, | <0.001  | (9.81,  | (7.86,  | (-1.11, | <0.001 |
| America            | 142.78)  | 142.78)  | 0.04)   |        | ,        | ,        | 0.27)   |        | 673.36)  | 566.03)  | -0.30)  |         | 10.19)  | 8.19)   | -0.41)  |        |

|                |          |          |         |        |          |          |         |        |          |          |         |        |         |         |         |        |
|----------------|----------|----------|---------|--------|----------|----------|---------|--------|----------|----------|---------|--------|---------|---------|---------|--------|
|                |          |          |         |        | 1654.89) | 1637.11) |         |        |          |          |         |        |         |         |         |        |
| United States  | 107.98   | 117.35   | 0.29    |        | 975.91   | 1018.49  | 0.15    |        | 1091.92  | 578.68   | -2.13   |        | 18.01   | 9.13    | -2.28   |        |
| Virgin Islands | (77.91,  | (82.41,  | (0.26,  | <0.001 | (880.88, | (909.51, | (0.13,  | <0.001 | (991.36, | (498.01, | (-2.68, | <0.001 | (7.32,  | (1.84,  | (-2.92, | <0.001 |
|                | 146.12)  | 162.61)  | 0.32)   |        | 1078.68) | 1137.36) | 0.18)   |        | 1200.19) | 669.20)  | -1.57)  |        | 37.32)  | 28.04)  | -1.64)  |        |
|                | 69.10    | 67.50    | -0.07   |        | 690.67   | 724.93   | 0.19    |        | 859.54   | 425.55   | -2.32   |        | 13.84   | 6.23    | -2.63   |        |
| Uruguay        | (64.33,  | (62.98,  | (-0.11, | 0.001  | (675.43, | (709.88, | (0.03,  | 0.023  | (842.50, | (414.09, | (-2.61, | <0.001 | (11.75, | (4.91,  | (-2.96, | <0.001 |
|                | 74.13)   | 72.28)   | -0.03)  |        | 706.17)  | 740.23)  | 0.36)   |        | 876.85)  | 437.25)  | -2.03)  |        | 16.20)  | 7.79)   | -2.30)  |        |
|                | 156.24   | 157.40   | 0.04    |        | 1683.33  | 1804.79  | 0.24    |        | 1434.86  | 1596.79  | 0.43    |        | 22.98   | 25.65   | 0.45    |        |
| Uzbekistan     | (153.54, | (155.34, | (0.01,  | 0.014  | (1674.41 | (1797.81 | (0.19,  | <0.001 | (1426.43 | (1590.24 | 0.43    |        | 22.98   | 25.65   | 0.45    |        |
|                | 158.98)  | 159.47)  | 0.06)   |        | '        | '        | 0.29)   |        | '        | '        | 0.89)   |        | 24.08)  | 26.50)  | 0.95)   | 0.075  |
|                |          |          |         |        | 1692.28) | 1811.78) |         |        | 1443.33) | 1603.36) |         |        |         |         |         |        |
|                | 199.60   | 184.35   | -0.28   |        | 1966.90  | 1900.98  | -0.11   |        | 3359.23  | 4081.00  | 0.65    |        | 55.53   | 68.28   | 0.69    |        |
| Vanuatu        | (163.66, | (160.02, | (-0.28, | <0.001 | (1851.10 | (1821.34 | (-0.17, | <0.001 | (3203.86 | (3961.92 | 0.65    |        | 55.53   | 68.28   | 0.69    |        |
|                | 241.43)  | 211.48)  | -0.27)  |        | '        | '        | -0.05)  |        | '        | '        | 0.86)   |        | 80.22)  | 85.90)  | 0.90)   | <0.001 |
|                |          |          |         |        | 2088.37) | 1983.35) |         |        | 3520.42) | 4202.86) |         |        |         |         |         |        |
| Venezuela      | 79.23    | 71.57    | -0.35   |        | 795.60   | 763.10   | -0.11   |        | 1052.18  | 706.52   | -1.34   |        | 17.38   | 11.32   | -1.45   |        |
| (Bolivarian    | (77.23,  | (69.99,  | (-0.36, | <0.001 | (789.26, | (757.91, | (-0.32, | 0.319  | (1044.82 | (701.55, | (-2.26, | 0.005  | (16.44, | (10.70, | (-2.40, | 0.004  |
| Republic of)   | 81.26)   | 73.18)   | -0.33)  |        | 801.97)  | 768.31)  | 0.10)   |        | '        | 711.51)  | -0.40)  |        | 18.37)  | 11.96)  | -0.48)  |        |
|                | 79.75    | 76.91    | -0.11   |        | 752.30   | 796.72   | 0.24    |        | 971.07   | 695.87   | -1.14   |        | 15.49   | 10.42   | -1.36   |        |
| Viet Nam       | (78.66,  | (76.06,  | (-0.19, | 0.008  | (748.97, | (793.98, | (-0.02, | 0.073  | (967.22, | (693.34, | (-1.25, | <0.001 | (15.00, | (10.12, | (-1.48, | <0.001 |
|                | 80.85)   | 77.76)   | -0.03)  |        | 755.65)  | 799.47)  | 0.50)   |        | 974.94)  | 698.41)  | -1.03)  |        | 15.99)  | 10.74)  | -1.25)  |        |
|                | 164.75   | 162.92   | -0.04   |        | 1868.27  | 1951.54  | 0.16    |        | 1822.10  | 1459.41  | -0.73   |        | 30.10   | 23.33   | -0.83   |        |
| Yemen          | (160.93, | (160.70, | (-0.06, | <0.001 | (1855.34 | (1943.83 | (-0.02, | 0.076  | (1808.91 | (1452.64 | (-0.94, | <0.001 | (28.41, | (22.47, | (-1.10, | <0.001 |
|                | 168.64)  | 165.17)  | -0.02)  |        | '        | '        | 0.33)   |        | '        | '        | -0.51)  |        | 31.86)  | 24.21)  | -0.56)  |        |
|                |          |          |         |        | 1881.27) | 1959.28) |         |        | 1835.37) | 1466.21) |         |        |         |         |         |        |
|                | 184.31   | 179.07   | -0.10   |        | 2826.10  | 2865.94  | 0.05    |        | 1265.34  | 1067.85  | -0.57   |        | 18.78   | 15.43   | -0.67   |        |
| Zambia         | (179.29, | (176.04, | (-0.12, | <0.001 | (2806.13 | (2853.64 | (0.01,  | 0.014  | (1251.25 | (1060.08 | (-0.81, | <0.001 | (17.06, | (14.49, | (-0.93, | <0.001 |
|                | 189.46)  | 182.14)  | -0.09)  |        | '        | '        | 0.08)   |        | '        | '        | -0.34)  |        | 20.64)  | 16.41)  | -0.40)  |        |
|                |          |          |         |        | 2846.19) | 2878.29) |         |        | 1279.57) | 1075.67) |         |        |         |         |         |        |
|                | 161.73   | 177.68   | 0.33    |        | 2611.79  | 2720.18  | 0.14    |        | 826.90   | 1119.77  | 1.06    |        | 11.13   | 15.97   | 1.26    |        |
| Zimbabwe       | (157.66, | (174.34, | (0.30,  | <0.001 | (2595.29 | (2707.04 | (0.11,  | <0.001 | (817.48, | (1111.27 | (0.52,  | <0.001 | (10.04, | (14.96, | (0.72,  | <0.001 |
|                | 165.89)  | 181.07)  | 0.36)   |        | '        | '        | 0.18)   |        | 836.42)  | '        | 1.60)   |        | 12.31)  | 17.03)  | 1.81)   |        |

|                     |          |          |         | 2628.39) | 2733.37) |          |         |          |          | 1128.32) |         |        |         |         |         |        |
|---------------------|----------|----------|---------|----------|----------|----------|---------|----------|----------|----------|---------|--------|---------|---------|---------|--------|
| <b>Women</b>        |          |          |         |          |          |          |         |          |          |          |         |        |         |         |         |        |
| Afghanistan         | 179.23   | 182.98   | 0.07    |          | 1759.41  | 1814.87  | 0.12    |          | 4077.77  | 2557.39  | -1.54   |        | 68.97   | 42.56   | -1.59   |        |
|                     | (172.76, | (179.58, | (0.04,  | <0.001   | (1739.16 | (1804.18 | (0.09,  | <0.001   | (4045.76 | (2544.06 | (-1.73, | <0.001 | (64.82, | (40.83, | (-1.78, | <0.001 |
|                     | 185.90)  | 186.43)  | 0.09)   |          | ,        | ,        | 0.15)   |          | ,        | ,        | -1.35)  |        | 73.33)  | 44.34)  | -1.40)  |        |
| Albania             | 126.52   | 123.35   | -0.08   |          | 2482.15  | 2521.39  | 0.06    |          | 915.28   | 671.87   | -1.21   |        | 12.42   | 8.30    | -1.58   |        |
|                     | (118.22, | (113.45, | (-0.11, | <0.001   | (2444.89 | (2475.94 | (0.00,  | 0.051    | (892.50, | (648.55, | (-1.49, | <0.001 | (9.87,  | (5.90,  | (-1.94, | <0.001 |
|                     | 135.29)  | 133.90)  | -0.05)  |          | ,        | ,        | 0.12)   |          | 938.53)  | 695.83)  | -0.93)  |        | 15.45)  | 11.39)  | -1.22)  |        |
| Algeria             | 128.13   | 115.57   | -0.36   |          | 1651.16  | 1679.79  | 0.08    |          | 1984.66  | 894.74   | -2.69   |        | 32.05   | 13.20   | -2.99   |        |
|                     | (124.79, | (113.32, | (-0.38, | <0.001   | (1639.15 | (1671.16 | (-0.01, | 0.093    | (1971.21 | (888.53, | (-2.89, | <0.001 | (30.34, | (12.47, | (-3.20, | <0.001 |
|                     | 131.55)  | 117.86)  | -0.35)  |          | ,        | ,        | 0.18)   |          | ,        | 900.99)  | -2.49)  |        | 33.84)  | 13.98)  | -2.78)  |        |
| American Samoa      | 129.97   | 149.83   | 0.49    |          | 1942.81  | 2025.75  | 0.16    |          | 1133.20  | 1307.45  | 0.53    |        | 16.25   | 19.12   | 0.59    |        |
|                     | (67.77,  | (82.65,  | (0.48,  | <0.001   | (1672.63 | (1752.46 | (0.09,  | <0.001   | (925.85, | (1085.34 | (0.38,  | <0.001 | (1.10,  | (1.84,  | (0.42,  | <0.001 |
|                     | 229.53)  | 252.89)  | 0.51)   |          | ,        | ,        | 0.22)   |          | 1375.62) | ,        | 0.68)   |        | 75.50)  | 78.30)  | 0.76)   |        |
| Andorra             | 56.01    | 56.95    | 0.07    |          | 720.07   | 733.57   | 0.08    |          | 266.48   | 185.89   | -1.19   |        | 3.48    | 2.14    | -1.62   |        |
|                     | (21.94,  | (23.24,  | (0.02,  | 0.008    | (575.73, | (592.57, | (0.01,  | 0.036    | (181.91, | (119.29, | (-1.35, | <0.001 | (0.00,  | (0.00,  | (-1.84, | <0.001 |
|                     | 123.59)  | 121.68)  | 0.11)   |          | 893.64)  | 901.66)  | 0.16)   |          | 381.40)  | 280.83)  | -1.02)  |        | 48.42)  | 42.97)  | -1.41)  |        |
| Angola              | 177.84   | 161.32   | -0.34   |          | 2982.77  | 3075.52  | 0.12    |          | 1161.63  | 738.47   | -1.54   |        | 16.83   | 9.45    | -1.95   |        |
|                     | (171.88, | (158.05, | (-0.35, | <0.001   | (2958.10 | (3061.08 | (0.05,  | <0.001   | (1145.77 | (731.18, | (-1.86, | <0.001 | (14.94, | (8.62,  | (-2.37, | <0.001 |
|                     | 183.97)  | 164.64)  | -0.32)  |          | ,        | ,        | 0.18)   |          | ,        | 745.82)  | -1.23)  |        | 18.89)  | 10.33)  | -1.52)  |        |
| Antigua and Barbuda | 173.19   | 170.49   | -0.05   |          | 2774.84  | 2770.63  | -0.00   |          | 869.48   | 477.25   | -2.11   |        | 12.42   | 5.57    | -2.79   |        |
|                     | (109.46, | (115.07, | (-0.07, | <0.001   | (2497.03 | (2530.82 | (-0.03, | 0.884    | (716.20, | (381.52, | (-2.39, | <0.001 | (1.00,  | (0.15,  | (-3.65, | <0.001 |
|                     | 261.74)  | 244.54)  | -0.03)  |          | ,        | ,        | 0.03)   |          | 1046.75) | 590.88)  | -1.82)  |        | 52.99)  | 33.72)  | -1.92)  |        |
| Argentina           | 110.23   | 102.11   | -0.26   |          | 1810.60  | 1914.98  | 0.20    |          | 1018.39  | 484.96   | -2.52   |        | 15.34   | 6.08    | -3.12   |        |
|                     | (107.62, | (100.00, | (-0.27, | <0.001   | (1799.97 | (1905.86 | (0.18,  | <0.001   | (1010.39 | (480.39, | (-2.88, | <0.001 | (14.37, | (5.58,  | (-3.60, | <0.001 |
|                     | 112.89)  | 104.25)  | -0.26)  |          | ,        | ,        | 0.22)   |          | ,        | 489.56)  | -2.15)  |        | 16.35)  | 6.61)   | -2.64)  |        |
|                     |          |          |         | 1821.29) | 1924.14) |          |         | 1026.43) |          |          |         |        |         |         |         |        |

|            |          |          |         |        |          |          |         |        |          |          |         |        |         |         |         |        |
|------------|----------|----------|---------|--------|----------|----------|---------|--------|----------|----------|---------|--------|---------|---------|---------|--------|
|            | 144.86   | 137.32   | -0.17   |        | 2120.31  | 2022.14  | -0.16   |        | 666.62   | 342.07   | -2.24   |        | 8.67    | 3.29    | -3.25   |        |
| Armenia    | (136.21, | (127.57, | (-0.21, | <0.001 | (2086.96 | (1984.92 | (-0.18, | <0.001 | (647.99, | (327.18, | (-2.89, | <0.001 | (6.67,  | (2.02,  | (-4.19, | <0.001 |
|            | 153.93)  | 147.72)  | -0.14)  |        | ,        | ,        | -0.14)  |        | 685.68)  | 357.58)  | -1.58)  |        | 11.12)  | 5.27)   | -2.30)  |        |
|            |          |          |         |        | 2154.08) | 2059.99) |         |        |          |          |         |        |         |         |         |        |
|            | 63.05    | 64.18    | 0.06    |        | 796.18   | 801.03   | 0.02    |        | 331.80   | 202.68   | -1.67   |        | 4.38    | 2.28    | -2.21   |        |
| Australia  | (60.43,  | (61.82,  | (0.04,  | <0.001 | (786.81, | (792.67, | (-0.04, | 0.587  | (325.76, | (198.49, | (-2.19, | <0.001 | (3.72,  | (1.86,  | (-2.89, | <0.001 |
|            | 65.76)   | 66.61)   | 0.07)   |        | 805.64)  | 809.47)  | 0.08)   |        | 337.93)  | 206.95)  | -1.16)  |        | 5.14)   | 2.77)   | -1.52)  |        |
|            |          |          |         |        | 1092.16  | 1045.20  | -0.14   |        | 401.06   | 184.66   | -2.73   |        | 5.45    | 1.83    | -3.80   |        |
| Austria    | (74.01,  | (70.97,  | (-0.15, | <0.001 | (1075.34 | (1028.29 | (-0.22, | <0.001 | (390.90, | (177.63, | (-3.33, | <0.001 | (4.33,  | (1.21,  | (-4.32, | <0.001 |
|            | 83.07)   | 80.08)   | -0.10)  |        | ,        | ,        | -0.06)  |        | 411.43)  | 191.92)  | -2.13)  |        | 6.80)   | 2.72)   | -3.28)  |        |
|            |          |          |         |        | 1109.20) | 1062.34) |         |        |          |          |         |        |         |         |         |        |
|            | 148.19   | 138.11   | -0.24   |        | 1990.73  | 1942.24  | -0.08   |        | 1246.07  | 829.74   | -1.43   |        | 18.68   | 11.51   | -1.68   |        |
| Azerbaijan | (142.22, | (133.07, | (-0.25, | <0.001 | (1968.62 | (1923.42 | (-0.10, | <0.001 | (1228.47 | (817.54, | (-2.05, | <0.001 | (16.56, | (10.13, | (-2.07, | <0.001 |
|            | 154.36)  | 143.31)  | -0.23)  |        | ,        | ,        | -0.06)  |        | ,        | 842.10)  | -0.80)  |        | 21.00)  | 13.06)  | -1.29)  |        |
|            |          |          |         |        | 2013.05) | 1961.22) |         |        | 1263.87) |          |         |        |         |         |         |        |
|            | 179.42   | 180.26   | 0.03    |        | 2454.75  | 2445.74  | -0.01   |        | 1147.67  | 892.10   | -1.07   |        | 17.70   | 13.25   | -1.21   |        |
| Bahamas    | (146.74, | (151.47, | (-0.01, | 0.171  | (2329.15 | (2336.46 | (-0.05, | 0.715  | (1060.82 | (827.07, | (-1.31, | <0.001 | (8.41,  | (6.46,  | (-1.54, | <0.001 |
|            | 217.62)  | 213.08)  | 0.06)   |        | ,        | ,        | 0.04)   |        | ,        | 961.04)  | -0.83)  |        | 33.16)  | 24.33)  | -0.89)  |        |
|            |          |          |         |        | 2585.71) | 2558.94) |         |        | 1240.02) |          |         |        |         |         |         |        |
|            | 86.72    | 82.71    | -0.16   |        | 1221.73  | 1180.43  | -0.09   |        | 965.45   | 388.49   | -3.10   |        | 13.88   | 4.64    | -3.61   |        |
| Bahrain    | (69.10,  | (71.84,  | (-0.23, | <0.001 | (1152.66 | (1138.31 | (-0.18, | 0.054  | (903.82, | (363.92, | (-3.92, | <0.001 | (7.40,  | (2.35,  | (-4.78, | <0.001 |
|            | 107.74)  | 94.93)   | -0.08)  |        | ,        | ,        | 0.00)   |        | 1030.40) | 414.42)  | -2.29)  |        | 24.05)  | 8.47)   | -2.42)  |        |
|            |          |          |         |        | 1294.08) | 1223.88) |         |        |          |          |         |        |         |         |         |        |
|            | 146.96   | 139.83   | -0.18   |        | 1910.52  | 1912.01  | 0.03    |        | 1535.63  | 800.60   | -2.14   |        | 23.95   | 11.30   | -2.37   |        |
| Bangladesh | (145.28, | (138.59, | (-0.19, | <0.001 | (1904.28 | (1907.41 | (-0.18, | 0.780  | (1529.94 | (797.61, | (-2.92, | <0.001 | (23.24, | (10.95, | (-2.99, | <0.001 |
|            | 148.65)  | 141.07)  | -0.16)  |        | ,        | ,        | 0.24)   |        | ,        | 803.60)  | -1.36)  |        | 24.69)  | 11.67)  | -1.76)  |        |
|            |          |          |         |        | 1916.79) | 1916.62) |         |        | 1541.34) |          |         |        |         |         |         |        |
|            | 175.61   | 180.31   | 0.10    |        | 2560.75  | 2597.47  | 0.05    |        | 718.79   | 528.63   | -1.14   |        | 9.85    | 6.61    | -1.48   |        |
| Barbados   | (142.46, | (145.12, | (0.04,  | 0.001  | (2429.44 | (2459.13 | (0.03,  | <0.001 | (650.02, | (467.72, | (-1.50, | <0.001 | (3.41,  | (1.59,  | (-1.95, | <0.001 |
|            | 214.36)  | 221.77)  | 0.16)   |        | ,        | ,        | 0.08)   |        | 793.05)  | 595.61)  | -0.77)  |        | 22.51)  | 18.78)  | -1.02)  |        |
|            |          |          |         |        | 2697.51) | 2741.86) |         |        |          |          |         |        |         |         |         |        |
|            | 95.59    | 96.63    | 0.04    |        | 900.91   | 928.16   | 0.12    |        | 587.87   | 493.64   | -0.64   |        | 8.50    | 6.92    | -0.77   |        |
| Belarus    | (91.41,  | (91.86,  | (0.03,  | <0.001 | (887.99, | (913.34, | (0.05,  | 0.001  | (577.44, | (483.17, | (-1.81, | 0.291  | (7.29,  | (5.76,  | (-2.20, | 0.299  |

|                |          |          |         |        |          |          |         |        |          |          |         |        |         |        |         |        |
|----------------|----------|----------|---------|--------|----------|----------|---------|--------|----------|----------|---------|--------|---------|--------|---------|--------|
|                | 99.92)   | 101.62)  | 0.05)   |        | 913.99)  | 943.20)  | 0.18)   |        | 598.44)  | 504.33)  | 0.55)   | 9.86)  | 8.31)   | 0.69)  |         |        |
|                |          |          |         |        |          | 1052.22  |         |        |          |          |         |        |         |        |         |        |
|                | 60.35    | 58.80    | -0.08   |        | 966.46   | (1037.26 | 0.31    |        | 456.46   | 206.55   | -2.69   | 6.51   | 2.16    | -3.72  |         |        |
| Belgium        | (56.90,  | (55.31,  | (-0.16, | 0.058  | (952.45, |          | (0.22,  | <0.001 | (446.85, | (199.98, | (-3.17, | <0.001 | (5.42,  | (1.55, | (-4.31, | <0.001 |
|                | 63.98)   | 62.46)   | 0.00)   |        | 980.64)  | ,        | 0.40)   |        | 466.24)  | 213.30)  | -2.20)  |        | 7.78)   | 2.97)  | -3.13)  |        |
|                |          |          |         |        |          | 1067.36) |         |        |          |          |         |        |         |        |         |        |
|                |          |          |         |        | 2399.17  | 2608.17  |         |        |          |          |         |        |         |        |         |        |
|                | 177.99   | 185.72   | 0.15    |        | (2235.31 | (2502.87 | 0.29    |        | 668.47   | 652.15   | -0.23   | 9.22   | 8.72    | -0.41  |         |        |
| Belize         | (135.63, | (158.50, | (0.12,  | <0.001 |          |          | (0.24,  | <0.001 | (580.86, | (599.55, | (-0.81, | 0.430  | (1.73,  | (3.63, | (-1.16, | 0.286  |
|                | 230.90)  | 216.43)  | 0.19)   |        | ,        | ,        | 0.34)   |        | 766.63)  | 708.23)  | 0.35)   |        | 29.91)  | 17.72) | 0.34)   |        |
|                |          |          |         |        |          |          |         |        |          |          |         |        |         |        |         |        |
|                |          |          |         |        | 2510.27  | 2642.99  |         |        |          |          |         |        |         |        |         |        |
|                | 140.93   | 141.64   | 0.02    |        | (2477.55 | (2622.49 | 0.19    |        | 834.24   | 751.02   | -0.36   | 11.50  | 9.95    | -0.49  |         |        |
| Benin          | (133.25, | (136.93, | (0.01,  | <0.001 |          |          | (0.15,  | <0.001 | (814.92, | (739.79, | (-0.57, | 0.001  | (9.30,  | (8.67, | (-0.74, | <0.001 |
|                | 148.96)  | 146.48)  | 0.03)   |        | ,        | ,        | 0.23)   |        | 853.94)  | 762.40)  | -0.14)  |        | 14.09)  | 11.37) | -0.24)  |        |
|                |          |          |         |        |          |          |         |        |          |          |         |        |         |        |         |        |
|                |          |          |         |        | 1404.26  | 1362.53  |         |        |          |          |         |        |         |        |         |        |
|                | 107.17   | 107.63   | 0.03    |        | (1210.94 | (1138.86 | -0.11   |        | 527.47   | 240.67   | -2.92   | 7.53   | 2.65    | -3.90  |         |        |
| Bermuda        | (59.55,  | (52.60,  | (-0.02, | 0.279  |          |          | (-0.20, | 0.012  | (411.72, | (152.59, | (-3.25, | <0.001 | (0.21,  | (0.00, | (-4.46, | <0.001 |
|                | 184.22)  | 202.46)  | 0.08)   |        | ,        | ,        | -0.03)  |        | 670.47)  | 366.85)  | -2.59)  |        | 52.53)  | 56.91) | -3.34)  |        |
|                |          |          |         |        |          |          |         |        |          |          |         |        |         |        |         |        |
|                |          |          |         |        | 1624.03) | 1621.92) |         |        |          |          |         |        |         |        |         |        |
|                |          |          |         |        |          |          |         |        |          |          |         |        |         |        |         |        |
|                |          |          |         |        | 1667.76  | 1629.19  |         |        | 1329.26  |          |         |        |         |        |         |        |
|                | 144.12   | 129.38   | -0.37   |        | (1590.90 | (1568.16 | -0.06   |        | 685.95   | -2.28    |         | 21.00  | 9.96    | -2.56  |         |        |
| Bhutan         | (122.66, | (112.61, | (-0.38, | <0.001 |          |          | (-0.18, | 0.349  | (1259.04 | (646.40, | (-2.55, | <0.001 | (12.94, | (5.72, | (-2.85, | <0.001 |
|                | 168.61)  | 147.98)  | -0.35)  |        | ,        | ,        | 0.06)   |        | ,        | 727.33)  | -2.01)  |        | 32.49)  | 16.16) | -2.27)  |        |
|                |          |          |         |        |          |          |         |        |          |          |         |        |         |        |         |        |
|                |          |          |         |        | 1747.64) | 1692.04) |         |        | 1402.59) |          |         |        |         |        |         |        |
|                |          |          |         |        |          |          |         |        |          |          |         |        |         |        |         |        |
|                |          |          |         |        | 2140.00  | 2118.93  |         |        | 1555.35  |          |         |        |         |        |         |        |
| Bolivia        | 158.81   | 136.23   | -0.53   |        | (2114.02 | (2100.53 | -0.02   |        | 722.43   | -2.60    |         | 24.22  | 10.17   | -2.93  |         |        |
| (Plurinational | (151.84, | (131.60, | (-0.56, | <0.001 |          |          | (-0.05, | 0.133  | (1532.94 | (711.63, | (-2.70, | <0.001 | (21.47, | (8.92, | (-3.03, | <0.001 |
| State of)      | 166.03)  | 140.99)  | -0.49)  |        | ,        | ,        | 0.01)   |        | ,        | 733.35)  | -2.50)  |        | 27.23)  | 11.55) | -2.82)  |        |
|                |          |          |         |        |          |          |         |        |          |          |         |        |         |        |         |        |
|                |          |          |         |        | 2166.24) | 2137.45) |         |        | 1578.02) |          |         |        |         |        |         |        |
|                |          |          |         |        |          |          |         |        |          |          |         |        |         |        |         |        |
|                |          |          |         |        | 1101.13  | 1159.25  |         |        |          |          |         |        |         |        |         |        |
| Bosnia and     | 79.56    | 86.29    | 0.28    |        | (1079.96 | (1130.33 | 0.21    |        | 542.28   | 420.79   | -0.91   | 7.28   | 5.10    | -1.25  |         |        |
| Herzegovina    | (73.96,  | (78.61,  | (0.24,  | <0.001 |          |          | (0.08,  | 0.001  | (527.50, | (403.62, | (-1.37, | <0.001 | (5.66,  | (3.39, | (-2.50, | 0.054  |
|                | 85.48)   | 94.57)   | 0.32)   |        | ,        | ,        | 0.34)   |        | 557.39)  | 438.56)  | -0.44)  |        | 9.23)   | 7.45)  | 0.02)   |        |
|                |          |          |         |        |          |          |         |        |          |          |         |        |         |        |         |        |
|                |          |          |         |        | 2578.20  | 2604.34  |         |        |          |          |         |        |         |        |         |        |
|                | 163.72   | 162.95   | -0.01   |        | (2516.79 | (2561.12 | 0.05    |        | 880.20   | 764.92   | -0.46   | 12.34  | 10.29   | -0.62  |         |        |
| Botswana       | (148.66, | (152.24, | (-0.03, | 0.071  |          |          | (-0.01, | 0.089  | (842.94, | (741.77, | (-0.92, | 0.050  | (8.22,  | (7.78, | (-1.15, | 0.025  |
|                | 180.05)  | 174.23)  | 0.00)   |        | ,        | ,        | 0.11)   |        | 918.78)  | 788.63)  | 0.00)   |        | 17.91)  | 13.39) | -0.08)  |        |
|                |          |          |         |        |          |          |         |        |          |          |         |        |         |        |         |        |
|                |          |          |         |        | 2640.85) | 2648.13) |         |        |          |          |         |        |         |        |         |        |

|                   |          |          |         |        |          |          |         |        |          |          |         |        |         |         |         |        |
|-------------------|----------|----------|---------|--------|----------|----------|---------|--------|----------|----------|---------|--------|---------|---------|---------|--------|
|                   | 163.41   | 140.77   | -0.51   |        | 2579.38  | 2526.51  | -0.06   |        | 1293.83  | 639.52   | -2.39   |        | 20.03   | 8.57    | -2.87   |        |
|                   |          |          |         |        | (2573.73 | (2521.79 |         |        | (1289.74 |          |         |        |         |         |         |        |
| Brazil            | (162.00, | (139.65, | (-0.55, | <0.001 | ,        | ,        | (-0.14, | 0.220  | ,        | (637.18, | (-2.53, | <0.001 | (19.53, | (8.30,  | (-3.03, | <0.001 |
|                   | 164.84)  | 141.90)  | -0.48)  |        |          |          | 0.03)   |        |          | 641.86)  | -2.26)  |        | 20.55)  | 8.84)   | -2.72)  |        |
|                   |          |          |         |        | 2585.03) | 2531.24) |         |        | 1297.92) |          |         |        |         |         |         |        |
|                   | 93.55    | 82.07    | -0.45   |        | 851.02   | 826.54   | -0.05   |        | 979.24   | 486.72   | -2.38   |        | 15.45   | 6.96    | -2.73   |        |
| Brunei Darussalam | (70.00,  | (65.04,  | (-0.48, | <0.001 | (776.24, | (770.58, | (-0.22, | 0.612  | (898.75, | (443.52, | (-2.55, | <0.001 | (6.89,  | (2.74,  | (-2.97, | <0.001 |
|                   | 122.79)  | 102.52)  | -0.43)  |        | 931.28)  | 885.79)  | 0.13)   |        | 1065.23) | 533.27)  | -2.22)  |        | 30.16)  | 15.03)  | -2.50)  |        |
|                   |          |          |         |        | 1713.50  | 1728.99  | 0.06    |        | 1077.48  | 783.85   | -1.09   |        | 15.84   | 10.86   | -1.32   |        |
| Bulgaria          | (79.01,  | (77.59,  | (-0.03, | <0.001 | (1692.45 | (1702.15 | (-0.07, | 0.384  | (1061.06 | (766.61, | (-1.42, | <0.001 | (13.92, | (8.96,  | (-1.72, | <0.001 |
|                   | 88.28)   | 88.95)   | -0.01)  |        | ,        | ,        | 0.18)   |        | ,        | 801.42)  | -0.76)  |        | 17.96)  | 13.11)  | -0.92)  |        |
|                   |          |          |         |        | 1734.75) | 1756.19) |         |        | 1094.10) |          |         |        |         |         |         |        |
|                   | 137.68   | 136.02   | -0.04   |        | 2346.31  | 2396.87  | 0.08    |        | 889.75   | 791.56   | -0.38   |        | 12.80   | 10.98   | -0.49   |        |
| Burkina Faso      | (132.13, | (132.59, | (-0.05, | <0.001 | (2323.13 | (2382.34 | (0.05,  | <0.001 | (874.99, | (782.99, | (-0.68, | 0.015  | (11.06, | (9.98,  | (-0.86, | 0.009  |
|                   | 143.42)  | 139.52)  | -0.03)  |        | ,        | ,        | 0.11)   |        | 904.71)  | 800.19)  | -0.07)  |        | 14.74)  | 12.06)  | -0.13)  |        |
|                   |          |          |         |        | 2369.68) | 2411.48) |         |        |          |          |         |        |         |         |         |        |
|                   | 208.91   | 187.41   | -0.38   |        | 3266.55  | 3340.68  | 0.09    |        | 1614.59  | 924.45   | -1.92   |        | 24.15   | 12.21   | -2.37   |        |
| Burundi           | (200.20, | (181.91, | (-0.41, | <0.001 | (3231.76 | (3316.99 | (0.02,  | 0.015  | (1589.38 | (911.63, | (-2.11, | <0.001 | (21.11, | (10.76, | (-2.63, | <0.001 |
|                   | 217.93)  | 193.04)  | -0.34)  |        | ,        | ,        | 0.16)   |        | ,        | 937.40)  | -1.73)  |        | 27.52)  | 13.82)  | -2.11)  |        |
|                   |          |          |         |        | 3301.66) | 3364.51) |         |        | 1640.13) |          |         |        |         |         |         |        |
|                   | 132.12   | 126.12   | -0.15   |        | 3231.07  | 3386.96  | 0.17    |        | 1056.70  | 564.88   | -2.16   |        | 14.55   | 5.99    | -3.12   |        |
| Cabo Verde        | (105.36, | (106.74, | (-0.18, | <0.001 | (3093.64 | (3283.32 | (0.15,  | <0.001 | (975.73, | (522.92, | (-2.36, | <0.001 | (6.41,  | (2.42,  | (-3.87, | <0.001 |
|                   | 164.46)  | 148.08)  | -0.13)  |        | ,        | ,        | 0.19)   |        | 1143.22) | 609.38)  | -1.97)  |        | 29.23)  | 12.40)  | -2.37)  |        |
|                   |          |          |         |        | 3373.76) | 3493.11) |         |        |          |          |         |        |         |         |         |        |
|                   | 120.77   | 107.27   | -0.41   |        | 1303.94  | 1279.37  | -0.06   |        | 1506.45  | 772.96   | -2.25   |        | 23.98   | 11.31   | -2.54   |        |
| Cambodia          | (115.96, | (103.88, | (-0.42, | <0.001 | (1288.01 | (1267.59 | (-0.15, | 0.182  | (1488.98 | (763.78, | (-2.40, | <0.001 | (21.80, | (10.22, | (-2.71, | <0.001 |
|                   | 125.73)  | 110.75)  | -0.39)  |        | ,        | ,        | 0.03)   |        | ,        | 782.22)  | -2.09)  |        | 26.33)  | 12.48)  | -2.36)  |        |
|                   |          |          |         |        | 1320.04) | 1291.23) |         |        | 1524.07) |          |         |        |         |         |         |        |
|                   | 136.33   | 143.36   | 0.18    |        | 2308.03  | 2541.55  | 0.33    |        | 989.52   | 839.95   | -0.54   |        | 14.46   | 11.62   | -0.73   |        |
| Cameroon          | (131.12, | (140.34, | (0.15,  | <0.001 | (2286.41 | (2528.77 | (0.30,  | <0.001 | (974.82, | (832.40, | (-0.68, | <0.001 | (12.71, | (10.73, | (-0.87, | <0.001 |
|                   | 141.71)  | 146.43)  | 0.20)   |        | ,        | ,        | 0.36)   |        | 1004.39) | 847.55)  | -0.41)  |        | 16.41)  | 12.56)  | -0.58)  |        |
|                   |          |          |         |        | 2329.83) | 2554.39) |         |        |          |          |         |        |         |         |         |        |
|                   | 99.09    | 91.23    | -0.27   |        | 1699.34  | 1576.53  | -0.23   |        | 362.38   | 253.26   | -1.21   |        | 4.08    | 2.44    | -1.78   |        |
| Canada            | (96.56,  | (88.83,  | (-0.32, | <0.001 | (1688.78 | (1566.52 | (-0.39, | 0.007  | (357.50, | (249.25, | (-1.62, | <0.001 | (3.59,  | (2.06,  | (-2.27, | <0.001 |

|                          |          |          |         |        |          |          |         |        |          |          |         |        |         |         |         |        |
|--------------------------|----------|----------|---------|--------|----------|----------|---------|--------|----------|----------|---------|--------|---------|---------|---------|--------|
|                          | 101.68)  | 93.68)   | -0.22)  |        | ,        | ,        | -0.06)  |        | 367.31)  | 257.33)  | -0.81)  |        | 4.64)   | 2.87)   | -1.29)  |        |
|                          |          |          |         |        | 1709.95) | 1586.59) |         |        |          |          |         |        |         |         |         |        |
|                          |          |          |         |        | 2984.23  | 3091.94  |         |        | 1251.40  | 1122.49  |         |        |         |         |         |        |
| Central African Republic | 191.27   | 199.81   | 0.15    |        | (2937.18 | (3058.48 | 0.13    |        | (1219.48 | (1101.53 | -0.29   |        | 18.58   | 16.25   | -0.36   |        |
|                          | (179.53, | (191.41, | (0.14,  | <0.001 |          |          | (0.10,  | <0.001 |          |          | (-0.66, | 0.130  | (14.82, | (13.77, | (-0.80, | 0.106  |
|                          |          |          |         |        | ,        | ,        |         |        | ,        | ,        |         |        |         |         |         |        |
|                          | 203.65)  | 208.51)  | 0.16)   |        | 3031.92) | 3125.70) | 0.16)   |        | 1283.98) | 1143.78) | 0.09)   |        | 23.07)  | 19.05)  | 0.08)   |        |
|                          |          |          |         |        | 2342.79  | 2431.65  |         |        | 978.90   | 873.56   | -0.34   |        | 14.21   | 12.30   | -0.45   |        |
| Chad                     | 143.25   | 144.87   | 0.04    |        | (2313.77 | (2413.39 | 0.15    |        | (959.67, | (862.22, | (-0.58, | 0.005  | (11.95, | (10.96, | (-0.72, | 0.002  |
|                          | (136.17, | (140.46, | (0.03,  | <0.001 |          |          | (0.06,  | 0.001  |          |          |         |        |         |         |         |        |
|                          |          |          |         |        | ,        | ,        |         |        | 998.44)  | 885.01)  | -0.11)  |        | 16.79)  | 13.76)  | -0.17)  |        |
|                          | 150.63)  | 149.40)  | 0.04)   |        | 2372.11) | 2450.02) | 0.24)   |        |          |          |         |        |         |         |         |        |
|                          |          |          |         |        | 828.22   | 862.92   | 0.15    |        | 457.53   | 269.02   | -1.75   |        | 6.50    | 3.25    | -2.27   |        |
| Chile                    | 61.82    | 61.11    | -0.03   |        | (817.68, | (853.15, | (0.08,  | <0.001 | (449.64, | (263.58, | (-1.89, | <0.001 | (5.59,  | (2.68,  | (-2.44, | <0.001 |
|                          | (58.95,  | (58.54,  | (-0.09, | 0.461  |          |          |         |        |          |          |         |        |         |         |         |        |
|                          |          |          |         |        | 838.86)  | 872.78)  | 0.22)   |        | 465.52)  | 274.55)  | -1.62)  |        | 7.53)   | 3.91)   | -2.10)  |        |
|                          | 64.79)   | 63.78)   | 0.04)   |        | 1308.40  | 1229.84  |         |        | 986.96   | 434.80   | -2.89   |        | 14.83   | 5.30    | -3.63   |        |
| China                    | 101.92   | 87.02    | -0.56   |        | (1307.00 | (1228.44 | -0.21   |        | (985.73, | (433.98, | (-3.57, | <0.001 | (14.68, | (5.21,  | (-4.29, | <0.001 |
|                          | (101.53, | (86.65,  | (-0.65, | <0.001 |          |          | (-0.24, | <0.001 |          |          |         |        |         |         |         |        |
|                          |          |          |         |        | ,        | ,        |         |        | 988.18)  | 435.62)  | -2.21)  |        | 14.98)  | 5.39)   | -2.96)  |        |
|                          | 102.31)  | 87.40)   | -0.48)  |        | 1309.80) | 1231.24) | -0.18)  |        |          |          |         |        |         |         |         |        |
|                          |          |          |         |        | 1108.31  | 1052.06  |         |        | 809.65   | 387.32   | -2.46   |        | 12.64   | 5.35    | -2.85   |        |
| Colombia                 | 77.54    | 63.63    | -0.68   |        | (1100.43 | (1045.59 | -0.16   |        | (802.84, | (383.41, | (-2.81, | <0.001 | (11.79, | (4.90,  | (-3.24, | <0.001 |
|                          | (75.45,  | (62.05,  | (-0.73, | <0.001 |          |          | (-0.32, | 0.060  |          |          |         |        |         |         |         |        |
|                          |          |          |         |        | ,        | ,        |         |        | 816.50)  | 391.27)  | -2.11)  |        | 13.53)  | 5.83)   | -2.47)  |        |
|                          | 79.67)   | 65.25)   | -0.64)  |        | 1116.24) | 1058.56) | 0.01)   |        |          |          |         |        |         |         |         |        |
|                          |          |          |         |        | 3436.50  | 3427.27  |         |        | 1191.81  | 887.92   | -1.00   |        | 16.52   | 11.46   | -1.23   |        |
| Comoros                  | 195.11   | 177.57   | -0.33   |        | (3310.61 | (3332.43 | -0.01   |        | (1115.43 | (839.25, | (-3.11, | 0.364  | (8.56,  | (6.52,  | (-3.94, | 0.381  |
|                          | (166.18, | (156.64, | (-0.35, | <0.001 |          |          | (-0.03, | 0.599  |          |          |         |        |         |         |         |        |
|                          |          |          |         |        | ,        | ,        |         |        | ,        |          |         |        |         |         |         |        |
|                          | 228.11)  | 200.65)  | -0.31)  |        | 3566.37) | 3524.23) | 0.02)   |        | 1272.36) | 938.76)  | 1.17)   |        | 29.22)  | 18.79)  | 1.55)   |        |
|                          |          |          |         |        | 3185.82  | 3178.60  |         |        | 1299.41  | 897.56   | -1.32   |        | 19.14   | 12.24   | -1.58   |        |
| Congo                    | 199.90   | 178.51   | -0.39   |        | (3134.06 | (3145.07 | -0.01   |        | (1264.69 | (879.64, | (-2.00, | <0.001 | (15.07, | (10.22, | (-2.34, | <0.001 |
|                          | (187.06, | (170.65, | (-0.42, | <0.001 |          |          | (-0.05, | 0.505  |          |          |         |        |         |         |         |        |
|                          |          |          |         |        | ,        | ,        |         |        | ,        |          |         |        |         |         |         |        |
|                          | 213.46)  | 186.64)  | -0.37)  |        | 3238.30) | 3212.40) | 0.03)   |        | 1334.90) | 915.76)  | -0.64)  |        | 24.02)  | 14.54)  | -0.82)  |        |
|                          |          |          |         |        | 1096.93  | 1123.05  | 0.10    |        | 1409.23  | 755.61   | -2.12   |        | 21.98   | 10.52   | -2.50   |        |
| Cook Islands             | 97.98    | 100.76   | 0.12    |        | (777.43, | (780.90, | (0.01,  | 0.026  | (1038.83 | (480.48, | (-2.19, | <0.001 | (0.18,  | (0.00,  | (-2.58, | <0.001 |
|                          | (22.95,  | (21.62,  | (0.06,  | <0.001 |          |          |         |        | ,        |          |         |        |         |         |         |        |
|                          |          |          |         |        | 1509.35) | 1565.74) | 0.19)   |        | 1873.22) | 1132.64) | -2.04)  |        | 161.09) | 144.57) | -2.42)  |        |
|                          | 278.66)  | 291.92)  | 0.18)   |        |          |          |         |        |          |          |         |        |         |         |         |        |

|                   |          |          |         |        |          |          |         |        |          |          |         |        |         |         |         |        |
|-------------------|----------|----------|---------|--------|----------|----------|---------|--------|----------|----------|---------|--------|---------|---------|---------|--------|
|                   | 137.08   | 132.24   | -0.12   |        | 2642.48  | 2640.77  | 0.00    |        | 647.01   | 445.11   | -1.27   |        | 8.56    | 5.05    | -1.61   |        |
| Costa Rica        | (128.15, | (125.12, | (-0.14, | <0.001 | (2602.61 | (2608.88 | (-0.02, | 0.927  | (627.03, | (432.18, | (-1.51, | <0.001 | (6.38,  | (3.77,  | (-2.15, | <0.001 |
|                   | 146.50)  | 139.69)  | -0.09)  |        | ,        | ,        | 0.02)   |        | 667.50)  | 458.36)  | -1.03)  |        | 11.28)  | 6.66)   | -1.07)  |        |
|                   |          |          |         |        | 2682.83) | 2672.96) |         |        |          |          |         |        |         |         |         |        |
|                   |          |          |         |        | 2509.14  | 2590.87  |         |        |          |          |         |        |         |         |         |        |
| Cote d'Ivoire     | 150.77   | 152.22   | 0.04    |        | (2488.18 | (2577.11 | 0.12    |        | 984.20   | 813.59   | -0.65   |        | 14.03   | 11.03   | -0.82   |        |
|                   | (145.65, | (148.89, | (0.01,  | 0.002  | ,        | ,        | (0.09,  | <0.001 | (970.58, | (805.77, | (-0.85, | <0.001 | (12.41, | (10.13, | (-1.08, | <0.001 |
|                   | 156.05)  | 155.60)  | 0.06)   |        | ,        | ,        | 0.16)   |        | 997.98)  | 821.47)  | -0.44)  |        | 15.81)  | 11.99)  | -0.56)  |        |
|                   |          |          |         |        | 2530.24) | 2604.70) |         |        |          |          |         |        |         |         |         |        |
|                   |          |          |         |        | 1002.52  | 956.90   | -0.13   |        | 509.84   | 229.26   | -2.77   |        | 7.01    | 2.30    | -3.73   |        |
| Croatia           | (71.83,  | (68.55,  | (-0.15, | <0.001 | (982.29, | (933.58, | (-0.30, | 0.151  | (495.50, | (217.95, | (-3.38, | <0.001 | (5.43,  | (1.32,  | (-4.61, | <0.001 |
|                   | 83.28)   | 81.93)   | -0.07)  |        | 1023.08) | 980.72)  | 0.05)   |        | 524.52)  | 241.07)  | -2.15)  |        | 8.94)   | 3.84)   | -2.84)  |        |
|                   |          |          |         |        | 2284.33  | 2247.66  |         |        |          |          |         |        |         |         |         |        |
|                   |          |          |         |        | (2264.79 | (2225.66 | -0.05   |        | 823.91   | 398.38   | -2.42   |        | 12.21   | 4.76    | -3.11   |        |
| Cuba              | (167.84, | (161.80, | (-0.13, | <0.001 | ,        | ,        | (-0.08, | <0.001 | (811.93, | (389.20, | (-2.60, | <0.001 | (10.78, | (3.82,  | (-3.35, | <0.001 |
|                   | 178.62)  | 173.96)  | -0.07)  |        | ,        | ,        | -0.03)  |        | 836.02)  | 407.72)  | -2.24)  |        | 13.78)  | 5.89)   | -2.86)  |        |
|                   |          |          |         |        | 2303.99) | 2269.82) |         |        |          |          |         |        |         |         |         |        |
|                   |          |          |         |        | 746.80   | 829.27   | 0.44    |        | 393.03   | 177.30   | -2.71   |        | 5.71    | 1.83    | -3.84   |        |
| Cyprus            | (36.24,  | (38.87,  | (0.02,  | <0.001 | (704.04, | (794.53, | (0.17,  | 0.002  | (362.09, | (161.37, | (-3.46, | <0.001 | (2.56,  | (0.59,  | (-4.98, | <0.001 |
|                   | 58.76)   | 56.59)   | 0.06)   |        | 791.58)  | 865.46)  | 0.72)   |        | 426.00)  | 194.71)  | -1.96)  |        | 11.12)  | 5.03)   | -2.68)  |        |
|                   |          |          |         |        | 1760.80  | 1707.29  |         |        |          |          |         |        |         |         |         |        |
|                   |          |          |         |        | (1741.63 | (1686.45 | -0.10   |        | 549.77   | 296.33   | -2.16   |        | 6.89    | 2.63    | -3.32   |        |
| Czechia           | (84.90,  | (84.59,  | (-0.01, | 0.175  | ,        | ,        | (-0.17, | 0.002  | (539.23, | (287.80, | (-2.89, | <0.001 | (5.77,  | (1.90,  | (-4.35, | <0.001 |
|                   | 93.56)   | 94.05)   | 0.04)   |        | ,        | ,        | -0.04)  |        | 560.49)  | 305.08)  | -1.42)  |        | 8.18)   | 3.59)   | -2.27)  |        |
|                   |          |          |         |        | 1780.14) | 1728.35) |         |        |          |          |         |        |         |         |         |        |
|                   |          |          |         |        | 1258.40  | 1295.78  |         |        | 1081.50  |          |         |        | 16.47   | 14.09   | -0.55   |        |
| Democratic        | 103.03   | 105.37   | 0.08    |        | (1247.56 | (1285.63 | 0.13    |        | (1071.32 | 949.04   | -0.46   |        | (15.23, | (13.06, | (-0.64, | <0.001 |
| People's Republic | (99.95,  | (102.48, | (0.06,  | <0.001 | ,        | ,        | (0.02,  | 0.016  | ,        | (940.39, | (-0.52, | <0.001 | (17.80) | 15.19)  | -0.45)  |        |
| of Korea          | 106.18)  | 108.33)  | 0.10)   |        | 1269.33) | 1306.00) | 0.23)   |        | 1091.76) | 957.76)  | -0.39)  |        |         |         |         |        |
|                   |          |          |         |        | 3018.11  | 3047.18  |         |        | 1065.45  |          |         |        | 15.25   | 10.26   | -1.38   |        |
| Democratic        | 174.37   | 171.09   | -0.06   |        | (3005.17 | (3038.80 | 0.05    |        | (1057.47 | 775.00   | -1.17   |        | (14.30, | (9.75,  | (-1.51, | <0.001 |
| Republic of the   | (171.28, | (169.13, | (-0.10, | 0.007  | ,        | ,        | (-0.01, | 0.098  | ,        | (770.61, | (-1.42, | <0.001 | 16.26)  | 10.79)  | -1.25)  |        |
| Congo             | 177.49)  | 173.07)  | -0.02)  |        | ,        | ,        | 0.12)   |        | ,        | 779.41)  | -0.92)  |        |         |         |         |        |
|                   |          |          |         |        | 3031.11) | 3055.58) |         |        | 1073.48) |          |         |        |         |         |         |        |
|                   |          |          |         |        | 1134.74  | 1034.30  | -0.32   |        | 364.12   | 161.82   | -2.75   |        | 4.85    | 1.45    | -4.05   |        |
| Denmark           | (69.35,  | (58.50,  | (-0.57, | <0.001 | (1113.33 | (1013.27 | (-0.39, | <0.001 | (352.13, | (153.58, | (-3.61, | <0.001 | (3.57,  | (0.77,  | (-5.30, | <0.001 |
|                   | 80.47)   | 69.08)   | -0.52)  |        | ,        | ,        | -0.24)  |        | 376.43)  | 170.40)  | -1.89)  |        | 6.48)   | 2.51)   | -2.79)  |        |



|                   |          |          |         |        |          |          |       |  |          |          |         |        |         |         |         |        |
|-------------------|----------|----------|---------|--------|----------|----------|-------|--|----------|----------|---------|--------|---------|---------|---------|--------|
|                   |          |          |         |        | 1156.48) | 1055.68) |       |  |          |          |         |        |         |         |         |        |
|                   |          |          |         |        | 3118.37  | 3349.06  |       |  |          |          |         |        |         |         |         |        |
|                   | 165.71   | 166.75   | 0.02    |        |          |          |       |  |          |          |         |        |         |         |         |        |
| Djibouti          | (139.63, | (150.69, | (0.01,  | <0.001 | (3000.23 | (3276.41 | 0.26  |  | 873.03   | 664.75   | -0.92   |        | 11.59   | 7.75    | -1.35   |        |
|                   | 195.69)  | 184.11)  | 0.02)   |        | ,        | ,        | 0.33) |  | 941.34)  | 697.67)  | -0.52)  |        | 22.57)  | 12.15)  | -0.83)  | <0.001 |
|                   |          |          |         |        | 3240.31) | 3422.99) |       |  |          |          |         |        |         |         |         |        |
|                   |          |          |         |        | 2505.79  | 2525.10  |       |  |          |          |         |        |         |         |         |        |
| Dominica          | 184.96   | 184.44   | -0.01   |        | (2240.62 | (2255.06 | 0.04  |  | 1137.39  | 828.70   | -1.11   |        | 17.16   | 11.78   | -1.25   |        |
|                   | (118.91, | (117.19, | (-0.06, | 0.859  | ,        | ,        | 0.09) |  | (958.10, | (677.31, | (-1.74, | 0.001  | (2.23,  | (0.83,  | (-1.66, | <0.001 |
|                   | 277.20)  | 276.50)  | 0.05)   |        | 2795.65) | 2818.78) |       |  | 1342.22) | 1004.06) | -0.48)  |        | 63.51)  | 51.23)  | -0.84)  |        |
|                   |          |          |         |        | 2302.22  | 2382.06  |       |  |          |          |         |        |         |         |         |        |
| Dominican         | 174.72   | 183.04   | 0.17    |        | (2277.87 | (2361.72 | 0.12  |  | 1245.28  | 1224.59  | -0.10   |        | 19.25   | 18.97   | -0.10   |        |
| Republic          | (168.10, | (177.44, | (0.15,  | <0.001 | ,        | ,        | 0.16) |  | (1227.00 | (1209.95 | (-0.55, | 0.684  | (17.01, | (17.18, | (-0.62, | 0.699  |
|                   | 181.56)  | 188.78)  | 0.18)   |        | 2326.78) | 2402.53) |       |  | ,        | ,        | 0.36)   |        | 21.72)  | 20.89)  | 0.42)   |        |
|                   |          |          |         |        | 2136.51  | 2132.24  |       |  |          |          |         |        |         |         |         |        |
| Ecuador           | 134.67   | 125.94   | -0.23   |        | (2116.27 | (2117.13 | 0.01  |  | 1134.41  | 630.70   | -2.03   |        | 17.11   | 8.54    | -2.40   |        |
|                   | (129.68, | (122.30, | (-0.25, | <0.001 | ,        | ,        | 0.06) |  | (1119.47 | (622.46, | (-2.67, | <0.001 | (15.30, | (7.60,  | (-3.17, | <0.001 |
|                   | 139.81)  | 129.66)  | -0.22)  |        | 2156.92) | 2147.43) |       |  | ,        | 639.01)  | -1.38)  |        | 19.09)  | 9.56)   | -1.62)  |        |
|                   |          |          |         |        | 2425.47  | 2579.32  |       |  |          |          |         |        |         |         |         |        |
| Egypt             | 136.61   | 137.12   | 0.01    |        | (2415.96 | (2572.26 | 0.23  |  | 2803.49  | 1552.38  | -1.96   |        | 44.14   | 23.18   | -2.13   |        |
|                   | (134.34, | (135.49, | (-0.00, | 0.081  | ,        | ,        | 0.30) |  | (2793.22 | (1546.89 | (-2.61, | <0.001 | (42.85, | (22.51, | (-2.86, | <0.001 |
|                   | 138.90)  | 138.76)  | 0.03)   |        | 2435.01) | 2586.39) |       |  | ,        | ,        | -1.31)  |        | 45.46)  | 23.86)  | -1.40)  |        |
|                   |          |          |         |        | 2298.87  | 2381.89  |       |  |          |          |         |        |         |         |         |        |
| El Salvador       | 142.11   | 134.30   | -0.19   |        | (2269.50 | (2355.78 | 0.14  |  | 1191.59  | 498.18   | -3.01   |        | 17.90   | 6.16    | -3.66   |        |
|                   | (134.97, | (128.18, | (-0.23, | <0.001 | ,        | ,        | 0.21) |  | (1170.12 | (486.19, | (-3.60, | <0.001 | (15.33, | (4.89,  | (-4.37, | <0.001 |
|                   | 149.56)  | 140.65)  | -0.14)  |        | 2328.55) | 2408.23) |       |  | ,        | 510.39)  | -2.41)  |        | 20.82)  | 7.68)   | -2.95)  |        |
|                   |          |          |         |        | 3055.12  | 3009.18  |       |  |          |          |         |        |         |         |         |        |
| Equatorial Guinea | 189.20   | 148.29   | -0.85   |        | (2934.86 | (2944.74 | -0.05 |  | 1198.31  | 557.46   | -2.56   |        | 17.54   | 6.40    | -3.35   |        |
|                   | (160.26, | (134.36, | (-0.91, | <0.001 | ,        | ,        | 0.01) |  | (1121.35 | (529.06, | (-3.15, | <0.001 | (9.32,  | (3.65,  | (-3.88, | <0.001 |
|                   | 222.12)  | 163.39)  | -0.78)  |        | 3179.27) | 3074.78) |       |  | ,        | 587.07)  | -1.97)  |        | 30.22)  | 10.51)  | -2.82)  |        |
|                   |          |          |         |        | 3437.21  | 3518.68  |       |  |          |          |         |        |         |         |         |        |
| Eritrea           | 204.82   | 192.16   | -0.22   |        | (3388.46 | (3487.22 | 0.09  |  | 1184.72  | 844.68   | -1.17   |        | 16.99   | 10.97   | -1.52   |        |
|                   | (193.19, | (184.97, | (-0.26, | <0.001 | ,        | ,        | 0.18) |  | (1154.97 | (828.75, | (-1.33, | <0.001 | (13.55, | (9.19,  | (-1.67, | <0.001 |
|                   | 217.03)  | 199.58)  | -0.19)  |        | 3486.52) | 3550.38) |       |  | ,        | 860.86)  | -1.01)  |        | 21.08)  | 13.01)  | -1.37)  |        |
|                   |          |          |         |        |          |          |       |  | 1215.07) |          |         |        |         |         |         |        |

|          |          |          |         |        |          |          |         |        |          |          |         |        |         |         |         |        |
|----------|----------|----------|---------|--------|----------|----------|---------|--------|----------|----------|---------|--------|---------|---------|---------|--------|
|          | 109.03   | 111.52   | 0.08    |        | 1100.68  | 1121.38  | 0.07    |        | 528.51   | 259.58   | -2.15   |        | 7.38    | 2.70    | -3.26   |        |
| Estonia  | (97.45,  | (97.59,  | (0.06,  | <0.001 | (1062.95 | (1075.80 | (0.02,  | 0.010  | (502.62, | (238.01, | (-2.91, | <0.001 | (4.64,  | (0.97,  | (-5.24, | 0.002  |
|          | 121.70)  | 127.16)  | 0.10)   |        | ,        | ,        | 0.12)   |        | 555.47)  | 282.84)  | -1.39)  |        | 11.27)  | 6.50)   | -1.24)  |        |
|          |          |          |         |        | 1139.48) | 1168.64) |         |        |          |          |         |        |         |         |         |        |
|          | 165.65   | 164.94   | -0.01   |        | 2514.58  | 2522.14  | 0.02    |        | 866.64   | 689.98   | -0.84   |        | 12.10   | 9.06    | -1.07   |        |
| Eswatini | (146.15, | (149.64, | (-0.04, | 0.629  | (2435.99 | (2461.08 | (-0.01, | 0.249  | (818.79, | (657.70, | (-1.29, | <0.001 | (6.97,  | (5.68,  | (-1.66, | <0.001 |
|          | 187.33)  | 181.46)  | 0.03)   |        | ,        | ,        | 0.05)   |        | 916.75)  | 723.50)  | -0.39)  |        | 19.78)  | 13.79)  | -0.49)  |        |
|          |          |          |         |        | 2595.32) | 2584.40) |         |        |          |          |         |        |         |         |         |        |
|          | 178.40   | 162.59   | -0.32   |        | 2794.70  | 3012.04  | 0.26    |        | 1531.00  | 612.10   | -3.10   |        | 23.35   | 7.22    | -3.95   |        |
| Ethiopia | (175.71, | (160.91, | (-0.34, | <0.001 | (2783.95 | (3004.68 | (0.24,  | <0.001 | (1522.78 | (608.70, | (-3.26, | <0.001 | (22.33, | (6.85,  | (-4.17, | <0.001 |
|          | 181.12)  | 164.28)  | -0.30)  |        | ,        | ,        | 0.28)   |        | ,        | 615.52)  | -2.93)  |        | 24.41)  | 7.61)   | -3.74)  |        |
|          |          |          |         |        | 2805.48) | 3019.41) |         |        | 1539.25) |          |         |        |         |         |         |        |
|          | 126.87   | 130.33   | 0.10    |        | 1573.49  | 1806.02  | 0.48    |        | 2155.95  | 1725.29  | -0.77   |        | 33.80   | 26.43   | -0.86   |        |
| Fiji     | (109.63, | (114.02, | (0.09,  | <0.001 | (1511.25 | (1743.77 | (0.41,  | <0.001 | (2082.79 | (1664.57 | (-0.98, | <0.001 | (25.16, | (19.41, | (-1.11, | <0.001 |
|          | 146.15)  | 148.34)  | 0.11)   |        | ,        | ,        | 0.55)   |        | ,        | ,        | -0.55)  |        | 44.56)  | 35.20)  | -0.60)  |        |
|          |          |          |         |        | 1637.73) | 1869.96) |         |        | 2231.11) | 1787.68) |         |        |         |         |         |        |
|          | 77.65    | 74.44    | -0.14   |        | 1081.65  | 1035.87  | -0.12   |        | 416.45   | 214.05   | -2.29   |        | 5.70    | 2.24    | -3.44   |        |
| Finland  | (72.07,  | (68.72,  | (-0.18, | <0.001 | (1060.46 | (1014.20 | (-0.24, | 0.039  | (403.53, | (204.30, | (-2.97, | <0.001 | (4.30,  | (1.36,  | (-3.91, | <0.001 |
|          | 83.59)   | 80.53)   | -0.09)  |        | ,        | ,        | -0.01)  |        | 429.72)  | 224.19)  | -1.60)  |        | 7.48)   | 3.54)   | -2.97)  |        |
|          |          |          |         |        | 1103.19) | 1057.92) |         |        |          |          |         |        |         |         |         |        |
|          | 55.69    | 54.55    | -0.06   |        | 952.74   | 919.98   | -0.12   |        | 316.87   | 186.28   | -1.87   |        | 4.08    | 1.97    | -2.55   |        |
| France   | (54.31,  | (53.12,  | (-0.10, | 0.001  | (947.02, | (914.09, | (-0.19, | 0.002  | (313.58, | (183.65, | (-2.25, | <0.001 | (3.72,  | (1.71,  | (-2.88, | <0.001 |
|          | 57.09)   | 56.01)   | -0.03)  |        | 958.49)  | 925.90)  | -0.04)  |        | 320.18)  | 188.94)  | -1.49)  |        | 4.47)   | 2.25)   | -2.21)  |        |
|          |          |          |         |        | 2911.27  | 2985.24  | 0.09    |        | 838.78   | 543.18   | -1.53   |        | 11.44   | 6.20    | -2.13   |        |
| Gabon    | (134.18, | (138.02, | (-0.05, | <0.001 | (2832.46 | (2930.95 | (0.07,  | <0.001 | (794.70, | (519.71, | (-1.79, | <0.001 | (6.75,  | (3.90,  | (-2.48, | <0.001 |
|          | 171.01)  | 162.70)  | -0.02)  |        | ,        | ,        | 0.12)   |        | 884.81)  | 567.47)  | -1.26)  |        | 18.31)  | 9.40)   | -1.79)  |        |
|          |          |          |         |        | 2991.91) | 3040.33) |         |        |          |          |         |        |         |         |         |        |
|          | 145.59   | 151.85   | 0.15    |        | 2671.15  | 2821.47  | 0.19    |        | 806.46   | 790.05   | 0.04    |        | 10.82   | 10.50   | 0.03    |        |
| Gambia   | (128.67, | (140.88, | (0.14,  | <0.001 | (2597.01 | (2773.47 | (0.11,  | <0.001 | (764.44, | (763.88, | (-0.76, | 0.930  | (6.38,  | (7.63,  | (-0.97, | 0.959  |
|          | 164.38)  | 163.52)  | 0.16)   |        | ,        | ,        | 0.27)   |        | 850.37)  | 816.93)  | 0.83)   |        | 17.40)  | 14.13)  | 1.03)   |        |
|          |          |          |         |        | 2747.10) | 2870.15) |         |        |          |          |         |        |         |         |         |        |
|          | 148.70   | 142.27   | -0.15   |        | 2162.45  | 2182.72  | 0.03    |        | 1381.42  | 650.53   | -2.53   |        | 20.56   | 8.22    | -3.09   |        |
| Georgia  | (141.53, | (132.64, | (-0.18, | <0.001 | (2134.90 | (2144.83 | (0.00,  | 0.037  | (1359.51 | (630.13, | (-3.54, | <0.001 | (17.97, | (6.10,  | (-4.21, | <0.001 |

|           |          |          |         |        |           |           |         |        |           |           |         |        |         |         |         |        |
|-----------|----------|----------|---------|--------|-----------|-----------|---------|--------|-----------|-----------|---------|--------|---------|---------|---------|--------|
|           | 156.16)  | 152.49)  | -0.12)  |        | ,         | ,         | 0.06)   | ,      | 671.50)   | -1.51)    |         | 23.43) | 10.94)  | -1.96)  |         |        |
|           |          |          |         |        | 2190.29)  | 2221.19)  |         |        | 1403.60)  |           |         |        |         |         |         |        |
|           |          |          |         |        | 1249.92)  | 1135.99)  |         |        |           |           |         |        |         |         |         |        |
|           | 73.18)   | 66.57)   | -0.32)  |        | (1244.20) | (1130.07) | -0.31)  |        | 506.11)   | 238.79)   | -2.60)  |        | 7.11)   | 2.64)   | -3.45)  |        |
| Germany   | (71.82,  | (65.15,  | (-0.35, | <0.001 |           |           | (-0.43, | <0.001 | (502.49,  | (236.10,  | (-2.97, | <0.001 | (6.69,  | (2.37,  | (-3.66, | <0.001 |
|           | 74.57)   | 68.01)   | -0.29)  |        | ,         | ,         | -0.19)  |        | 509.75)   | 241.51)   | -2.23)  |        | 7.55)   | 2.94)   | -3.24)  |        |
|           |          |          |         |        | 1255.66)  | 1141.94)  |         |        |           |           |         |        |         |         |         |        |
|           |          |          |         |        | 2634.07)  | 2651.55)  |         |        | 1440.21)  |           |         |        |         |         |         |        |
|           | 159.16)  | 148.35)  | -0.25)  |        | (2615.26) | (2639.48) | 0.03)   |        | 973.24)   | -1.36)    |         |        | 21.99)  | 13.85)  | -1.56)  |        |
| Ghana     | (154.54, | (145.50, | (-0.26, | <0.001 |           |           | (0.01,  | 0.016  | (1425.79) | (965.80,  | (-1.65, | <0.001 | (20.22, | (12.97, | (-1.91, | <0.001 |
|           | 163.90)  | 151.25)  | -0.23)  |        | ,         | ,         | 0.05)   |        |           | 980.73)   | -1.07)  |        | 23.88)  | 14.78)  | -1.22)  |        |
|           |          |          |         |        | 2653.00)  | 2663.66)  |         |        | 1454.74)  |           |         |        |         |         |         |        |
|           | 56.55)   | 56.38)   | 0.00)   |        | 686.93)   | 703.56)   | 0.13)   |        | 436.14)   | 288.82)   | -1.27)  |        | 6.33)   | 3.92)   | -1.52)  |        |
| Greece    | (53.21,  | (52.61,  | (-0.03, | 0.933  | (675.17,  | (690.21,  | (-0.12, | 0.309  | (426.79,  | (280.43,  | (-1.80, | <0.001 | (5.25,  | (3.02,  | (-2.12, | <0.001 |
|           | 60.04)   | 60.36)   | 0.04)   |        | 698.85)   | 717.13)   | 0.38)   |        | 445.65)   | 297.42)   | -0.74)  |        | 7.57)   | 5.05)   | -0.92)  |        |
|           |          |          |         |        | 1459.75)  | 1319.51)  | -0.30)  |        | 967.43)   | 467.92)   | -2.42)  |        | 15.12)  | 6.48)   | -2.85)  |        |
|           | 119.91)  | 101.83)  | -0.56)  |        | (1249.50) | (1106.16) | (-0.53, | 0.014  | (796.27,  | (344.96,  | (-2.75, | <0.001 | (1.44,  | (0.03,  | (-3.16, | <0.001 |
| Greenland | (65.72,  | (49.69,  | (-0.57, | <0.001 |           |           | -0.06)  |        | 1169.46)  | 623.67)   | -2.08)  |        | 70.06)  | 55.95)  | -2.54)  |        |
|           | 207.96)  | 189.22)  | -0.54)  |        | 1700.26)  | 1564.86)  |         |        |           |           |         |        |         |         |         |        |
|           |          |          |         |        | 2512.97)  | 2505.86)  | -0.01)  |        | 1441.98)  |           |         |        |         |         |         |        |
|           | 194.91)  | 189.85)  | -0.09)  |        | (2270.57) | (2286.34) | (-0.05, | 0.659  | (1257.16) | 786.34)   | -1.99)  |        | 22.48)  | 11.27)  | -2.25)  |        |
| Grenada   | (132.25, | (133.27, | (-0.11, | <0.001 |           |           | 0.03)   |        |           | 925.40)   | -1.56)  |        | (5.21,  | (1.43,  | (-2.74, | <0.001 |
|           | 278.80)  | 263.41)  | -0.07)  |        | 2775.55)  | 2741.61)  |         |        | 1647.48)  |           |         |        | 64.29)  | 41.31)  | -1.76)  |        |
|           |          |          |         |        | 1753.66)  | 1900.18)  | 0.29)   |        | 956.12)   | 1175.53)  | 0.74)   |        | 13.31)  | 17.00)  | 0.83)   |        |
|           | 116.69)  | 134.66)  | 0.52)   |        | (1602.93) | (1742.54) | (0.22,  | <0.001 | (845.74,  | (1051.58) | (0.17,  | 0.011  | (3.44,  | (5.28,  | (0.08,  | 0.030  |
| Guam      | (80.39,  | (95.22,  | (0.41,  | <0.001 |           |           | 0.36)   |        | 1077.18)  |           | 1.31)   |        | 35.48)  | 41.11)  | 1.59)   |        |
|           | 164.11)  | 185.32)  | 0.63)   |        | 1915.01)  | 2068.55)  |         |        |           | 1310.35)  |         |        |         |         |         |        |
|           |          |          |         |        | 2355.89)  | 2448.24)  | 0.14)   |        | 1706.57)  |           |         |        |         |         |         |        |
|           | 167.65)  | 144.45)  | -0.50)  |        | (2330.74) | (2432.88) | (0.10,  | <0.001 | (1684.82) | 756.22)   | -3.04)  |        | 26.64)  | 10.40)  | -3.51)  |        |
| Guatemala | (161.05, | (140.76, | (-0.58, | <0.001 |           |           | 0.19)   |        |           | (747.62,  | (-3.86, | <0.001 | (23.96, | (9.41,  | (-4.45, | <0.001 |
|           | 174.47)  | 148.21)  | -0.43)  |        | 2381.26)  | 2463.67)  |         |        | 1728.55)  | 764.90)   | -2.21)  |        | 29.55)  | 11.48)  | -2.56)  |        |
|           |          |          |         |        | 2061.15)  | 2355.52)  | 0.46)   |        | 1128.83)  | 1026.74)  | -0.30)  |        | 17.00)  | 14.99)  | -0.41)  |        |
|           | 126.01)  | 137.49)  | 0.30)   |        | (2034.80) | (2336.60) | (0.44,  | <0.001 | (1108.98) | (1013.92) | (-0.49, | 0.002  | (14.62, | (13.45, | (-0.62, | <0.001 |
| Guinea    | (119.54, | (132.93, | (0.28,  | <0.001 |           |           | 0.49)   |        |           |           | -0.12)  |        | (19.67, | 16.65)  | -0.19)  |        |
|           | 132.75)  | 142.18)  | 0.32)   |        | 2087.77)  | 2374.56)  |         |        | 1148.96)  | 1039.70)  |         |        |         |         |         |        |

|                               |          |          |         |        |          |          |         |        |          |          |         |        |         |         |         |        |
|-------------------------------|----------|----------|---------|--------|----------|----------|---------|--------|----------|----------|---------|--------|---------|---------|---------|--------|
|                               | 168.34   | 173.18   | 0.10    |        | 2256.84  | 2380.62  | 0.19    |        | 1614.81  | 1333.40  | -0.65   |        | 25.27   | 20.43   | -0.72   |        |
| Guinea-Bissau                 | (150.36, | (160.60, | (0.06,  | <0.001 | (2189.71 | (2333.40 | (0.16,  | <0.001 | (1556.41 | (1297.09 | (-0.78, | <0.001 | (18.37, | (16.12, | (-0.87, | <0.001 |
|                               | 188.02)  | 186.55)  | 0.13)   |        | ,        | ,        | 0.22)   |        | ,        | ,        | -0.52)  |        | 34.02)  | 25.59)  | -0.57)  |        |
|                               |          |          |         |        | 2325.65) | 2428.63) |         |        | 1674.94) | 1370.50) |         |        |         |         |         |        |
|                               |          |          |         |        | 2450.69  | 2430.57  | -0.01   |        | 1701.01  | 1443.50  | -0.56   |        | 26.93   | 22.64   | -0.60   |        |
| Guyana                        | (191.47, | (184.53, | (-0.13, | <0.001 | (2375.07 | (2354.06 | (-0.12, | 0.912  | (1636.84 | (1383.92 | (-1.54, | 0.267  | (19.33, | (15.69, | (-1.64, | 0.268  |
|                               | 236.99)  | 230.10)  | -0.09)  |        | ,        | ,        | 0.11)   |        | ,        | ,        | 0.43)   |        | 36.67)  | 31.68)  | 0.46)   |        |
|                               |          |          |         |        | 2528.26) | 2509.01) |         |        | 1767.17) | 1505.04) |         |        |         |         |         |        |
|                               |          |          |         |        | 2423.43  | 2397.29  | -0.02   |        | 3513.41  | 2143.16  | -1.67   |        | 58.23   | 34.63   | -1.76   |        |
| Haiti                         | (241.73, | (230.10, | (-0.23, | <0.001 | (2395.93 | (2379.07 | (-0.12, | 0.705  | (3479.89 | (2125.89 | (-2.05, | <0.001 | (53.96, | (32.46, | (-2.12, | <0.001 |
|                               | 259.50)  | 241.58)  | -0.20)  |        | ,        | ,        | 0.08)   |        | ,        | ,        | -1.28)  |        | 62.76)  | 36.90)  | -1.40)  |        |
|                               |          |          |         |        | 2451.18) | 2415.61) |         |        | 3547.18) | 2160.53) |         |        |         |         |         |        |
|                               |          |          |         |        | 2269.48  | 2327.97  | 0.10    |        | 1590.29  | 763.31   | -2.46   |        | 25.09   | 10.98   | -2.79   |        |
| Honduras                      | (148.98, | (142.15, | (-0.24, | <0.001 | (2237.23 | (2307.59 | (0.00,  | 0.042  | (1562.58 | (751.39, | (-2.86, | <0.001 | (21.68, | (9.58,  | (-3.25, | <0.001 |
|                               | 165.96)  | 152.38)  | -0.21)  |        | ,        | ,        | 0.19)   |        | ,        | ,        | -2.06)  |        | 28.90)  | 12.54)  | -2.32)  |        |
|                               |          |          |         |        | 2302.11) | 2348.50) |         |        | 1618.39) | 775.38)  |         |        |         |         |         |        |
|                               |          |          |         |        | 1275.03  | 1193.78  | -0.21   |        | 982.58   | 363.58   | -3.37   |        | 15.02   | 4.23    | -4.22   |        |
| Hungary                       | (97.28,  | (84.47,  | (-0.48, | <0.001 | (1258.90 | (1176.04 | (-0.26, | <0.001 | (968.83, | (353.99, | (-3.84, | <0.001 | (13.38, | (3.27,  | (-4.84, | <0.001 |
|                               | 106.42)  | 94.23)   | -0.42)  |        | ,        | ,        | -0.17)  |        | 996.49)  | 373.39)  | -2.89)  |        | 16.82)  | 5.42)   | -3.61)  |        |
|                               |          |          |         |        | 1291.33) | 1211.76) |         |        |          |          |         |        |         |         |         |        |
|                               |          |          |         |        | 759.69   | 779.36   | 0.12    |        | 331.23   | 164.68   | -2.36   |        | 4.64    | 1.74    | -3.35   |        |
| Iceland                       | (41.22,  | (39.71,  | (-0.21, | <0.001 | (686.20, | (709.96, | (-0.07, | 0.218  | (283.31, | (133.66, | (-2.53, | <0.001 | (0.72,  | (0.05,  | (-3.52, | <0.001 |
|                               | 86.18)   | 80.62)   | -0.15)  |        | 839.12)  | 854.13)  | 0.31)   |        | 385.15)  | 201.19)  | -2.20)  |        | 15.68)  | 10.51)  | -3.19)  |        |
|                               |          |          |         |        | 1845.42  | 1851.22  | 0.03    |        | 1528.57  | 1009.14  | -1.52   |        | 23.75   | 15.12   | -1.60   |        |
| India                         | (154.21, | (149.03, | (-0.18, | 0.002  | (1843.31 | (1849.64 | (-0.02, | 0.250  | (1526.64 | (1007.97 | (-2.06, | <0.001 | (23.51, | (14.97, | (-2.24, | <0.001 |
|                               | 155.42)  | 149.92)  | -0.04)  |        | ,        | ,        | 0.07)   |        | ,        | ,        | -0.97)  |        | 23.99)  | 15.26)  | -0.95)  |        |
|                               |          |          |         |        | 1847.54) | 1852.79) |         |        | 1530.50) | 1010.30) |         |        |         |         |         |        |
|                               |          |          |         |        | 1095.04  | 1100.42  | 0.03    |        | 1651.90  | 1027.33  | -1.60   |        | 25.88   | 15.22   | -1.79   |        |
| Indonesia                     | (91.61,  | (88.12,  | (-0.16, | <0.001 | (1091.66 | (1097.59 | (-0.05, | 0.460  | (1647.70 | (1024.61 | (-1.72, | <0.001 | (25.35, | (14.90, | (-1.92, | <0.001 |
|                               | 93.59)   | 89.73)   | -0.13)  |        | ,        | ,        | 0.11)   |        | ,        | ,        | -1.48)  |        | 26.42)  | 15.56)  | -1.66)  |        |
|                               |          |          |         |        | 1098.42) | 1103.25) |         |        | 1656.10) | 1030.06) |         |        |         |         |         |        |
| Iran (Islamic<br>Republic of) | 141.17   | 130.86   | -0.25   | <0.001 | 1932.55  | 1910.37  | -0.04   | <0.001 | 1148.19  | 625.56   | -2.07   | <0.001 | 17.26   | 8.23    | -2.53   | <0.001 |
|                               | (138.85, | (129.17, | (-0.29, |        | (1923.96 | (1903.89 | (-0.05, |        | (1141.48 | (621.87, | (-2.23, |        | (16.44, | (7.82,  | (-2.69, |        |

|            |          |          |         |        |          |          |         |        |          |          |         |        |         |         |         |        |
|------------|----------|----------|---------|--------|----------|----------|---------|--------|----------|----------|---------|--------|---------|---------|---------|--------|
|            | 143.52)  | 132.56)  | -0.22)  |        | ,        | ,        | -0.02)  |        | ,        | 629.27)  | -1.90)  |        | 18.12)  | 8.66)   | -2.38)  |        |
|            |          |          |         |        | 1941.18) | 1916.86) |         |        | 1154.93) |          |         |        |         |         |         |        |
|            |          |          |         |        | 2042.74  | 1990.77  |         |        | 1601.69  |          |         |        |         |         |         |        |
|            | 154.47   | 142.59   | -0.28   |        | (2026.26 | (1981.31 | -0.07   |        | (1586.89 | 923.72   | -1.92   |        | 24.75   | 13.24   | -2.19   |        |
| Iraq       | (149.97, | (140.07, | (-0.30, | <0.001 |          |          | (-0.12, | 0.001  |          | (917.19, | (-2.33, | <0.001 | (22.92, | (12.46, | (-2.65, | <0.001 |
|            | 159.07)  | 145.15)  | -0.25)  |        | ,        | ,        | -0.03)  |        | ,        | 930.29)  | -1.52)  |        | 26.69)  | 14.06)  | -1.72)  |        |
|            |          |          |         |        | 2059.33) | 2000.27) |         |        | 1616.59) |          |         |        |         |         |         |        |
|            | 65.36    | 59.64    | -0.32   |        | 956.88   | 937.46   | -0.06   |        | 407.35   | 173.07   | -2.91   |        | 5.74    | 1.74    | -4.07   |        |
| Ireland    | (59.37,  | (54.47,  | (-0.34, | <0.001 | (933.55, | (916.76, | (-0.17, | 0.286  | (392.19, | (164.32, | (-3.88, | <0.001 | (4.07,  | (0.98,  | (-5.44, | <0.001 |
|            | 71.80)   | 65.19)   | -0.29)  |        | 980.66)  | 958.53)  | 0.05)   |        | 422.94)  | 182.18)  | -1.93)  |        | 7.88)   | 2.90)   | -2.69)  |        |
|            | 54.60    | 53.26    | -0.08   |        | 707.32   | 728.82   | 0.13    |        | 331.65   | 137.00   | -3.02   |        | 4.57    | 1.25    | -4.45   |        |
| Israel     | (49.99,  | (49.75,  | (-0.13, | 0.006  | (690.50, | (715.69, | (0.02,  | 0.018  | (320.19, | (131.34, | (-3.26, | <0.001 | (3.32,  | (0.77,  | (-4.88, | <0.001 |
|            | 59.53)   | 56.96)   | -0.02)  |        | 724.45)  | 742.14)  | 0.23)   |        | 343.43)  | 142.83)  | -2.78)  |        | 6.16)   | 1.93)   | -4.01)  |        |
|            |          |          |         |        | 1311.86  | 1319.64  |         |        | 354.66   | 180.75   | -2.31   |        | 4.86    | 1.90    | -3.20   |        |
| Italy      | 120.33   | 114.81   | -0.15   |        | (1304.98 | (1311.85 | 0.04    |        | (351.09, | (177.85, | (-2.47, | <0.001 | (4.45,  | (1.62,  | (-3.57, | <0.001 |
|            | (118.26, | (112.50, | (-0.19, | <0.001 | ,        | ,        | (-0.05, | 0.413  |          | (358.27) | 183.70) | -2.14) | 5.30)   | 2.22)   | -2.84)  |        |
|            | 122.44)  | 117.15)  | -0.12)  |        | 2362.65  | 2568.24  | 0.29    |        | 875.60   | 785.72   | -0.17   |        | 12.79   | 11.18   | -0.13   |        |
|            |          |          |         |        | (2318.82 | (2527.80 | 0.27,   | <0.001 | (848.53, | (763.41, | (-1.52, | 0.808  | (9.67,  | (8.66,  | (-1.04, | 0.791  |
| Jamaica    | (157.23, | (178.37, | (0.36,  | <0.001 | ,        | ,        | 0.32)   |        | 903.38)  | 808.54)  | 1.20)   |        | 16.67)  | 14.23)  | 0.80)   |        |
|            | 180.84)  | 200.61)  | 0.46)   |        | 2407.17) | 2609.17) |         |        |          |          |         |        |         |         |         |        |
|            | 115.18   | 116.03   | 0.03    |        | 1204.94  | 1271.19  | 0.22    |        | 312.27   | 205.71   | -1.43   |        | 3.96    | 2.04    | -2.26   |        |
| Japan      | (113.77, | (114.42, | (-0.01, | 0.122  | (1200.38 | (1265.86 | (0.08,  | 0.002  | (309.95, | (203.56, | (-1.64, | <0.001 | (3.71,  | (1.83,  | (-2.78, | <0.001 |
|            | 116.60)  | 117.67)  | 0.07)   |        | ,        | ,        | 0.36)   |        | 314.59)  | 207.89)  | -1.22)  |        | 4.23)   | 2.26)   | -1.74)  |        |
|            |          |          |         |        | 1209.50) | 1276.54) |         |        |          |          |         |        |         |         |         |        |
|            | 102.43   | 88.66    | -0.48   |        | 1478.86  | 1427.25  | -0.11   |        | 786.85   | 355.48   | -2.64   |        | 11.28   | 3.86    | -3.58   |        |
| Jordan     | (94.20,  | (84.74,  | (-0.59, | <0.001 | (1447.57 | (1411.43 | (-0.22, | 0.042  | (763.70, | (347.59, | (-3.21, | <0.001 | (8.61,  | (3.07,  | (-4.30, | <0.001 |
|            | 111.25)  | 92.72)   | -0.37)  |        | ,        | ,        | -0.00)  |        | 810.57)  | 363.51)  | -2.06)  |        | 14.55)  | 4.79)   | -2.86)  |        |
|            |          |          |         |        | 1510.72) | 1443.20) |         |        |          |          |         |        |         |         |         |        |
|            | 106.15   | 88.86    | -0.62   |        | 1033.77  | 947.45   | -0.30   |        | 999.84   | 800.90   | -0.72   |        | 15.14   | 12.22   | -0.70   |        |
| Kazakhstan | (102.71, | (85.83,  | (-0.67, | <0.001 | (1022.97 | (937.39, | (-0.34, | <0.001 | (989.21, | (791.80, | (-1.26, | 0.010  | (13.86, | (11.13, | (-1.32, | 0.029  |
|            | 109.67)  | 91.99)   | -0.58)  |        | ,        | 957.61)  | -0.26)  |        | 1010.57) | 810.08)  | -0.18)  |        | 16.51)  | 13.41)  | -0.07)  |        |
|            |          |          |         |        | 1044.67) |          |         |        |          |          |         |        |         |         |         |        |
| Kenya      | 165.34   | 164.44   | -0.02   | <0.001 | 3145.79  | 3369.03  | 0.24    | <0.001 | 689.53   | 657.17   | -0.19   | <0.001 | 8.24    | 7.56    | -0.29   | <0.001 |

|                                        |                     |                     |                   |        |                           |                           |                   |        |                           |                           |                   |                 |                    |                   |                   |        |
|----------------------------------------|---------------------|---------------------|-------------------|--------|---------------------------|---------------------------|-------------------|--------|---------------------------|---------------------------|-------------------|-----------------|--------------------|-------------------|-------------------|--------|
|                                        | (161.46,<br>169.30) | (162.04,<br>166.87) | (-0.03,<br>-0.01) |        | (3128.51<br>,<br>3163.14) | (3358.01<br>,<br>3380.08) | (0.21,<br>0.27)   |        | (681.10,<br>698.05)       | (652.18,<br>662.19)       | (-0.27,<br>-0.12) | (7.32,<br>9.26) | (7.03,<br>8.13)    | (-0.43,<br>-0.15) |                   |        |
|                                        | 237.93              | 214.61              | -0.36             |        | 2033.88                   | 1938.78                   | -0.16             |        | 4183.65                   | 3425.23                   | -0.69             | 68.51           | 55.72              | -0.72             |                   |        |
| Kiribati                               | (165.73,<br>332.56) | (160.53,<br>281.42) | (-0.39,<br>-0.34) | <0.001 | (1809.36<br>,<br>2279.89) | (1768.19<br>,<br>2121.69) | (-0.18,<br>-0.13) | <0.001 | (3856.85<br>,<br>4531.91) | (3196.39<br>,<br>3666.41) | (-0.77,<br>-0.61) | <0.001          | (32.56,<br>128.50) | (30.05,<br>94.79) | (-0.82,<br>-0.61) | <0.001 |
|                                        | 85.03               | 86.14               | 0.06              |        | 1301.64                   | 1354.77                   | 0.13              |        | 710.46                    | 342.71                    | -2.34             | 10.11           | 3.81               | -3.15             |                   |        |
| Kuwait                                 | (75.69,<br>95.25)   | (80.63,<br>92.05)   | (0.02,<br>0.09)   | 0.002  | (1264.34<br>,<br>1339.81) | (1331.36<br>,<br>1378.58) | (0.09,<br>0.18)   | <0.001 | (682.93,<br>738.85)       | (331.17,<br>354.65)       | (-3.12,<br>-1.55) | <0.001          | (7.07,<br>14.09)   | (2.71,<br>5.34)   | (-4.19,<br>-2.10) | <0.001 |
|                                        | 154.48              | 136.95              | -0.41             |        | 2001.40                   | 1914.05                   | -0.15             |        | 1351.81                   | 631.23                    | -2.56             | 20.63           | 8.54               | -2.96             |                   |        |
| Kyrgyzstan                             | (146.36,<br>162.94) | (130.68,<br>143.45) | (-0.44,<br>-0.38) | <0.001 | (1971.85<br>,<br>2031.29) | (1890.46<br>,<br>1937.88) | (-0.17,<br>-0.14) | <0.001 | (1327.25<br>,<br>1376.74) | (617.61,<br>645.09)       | (-3.00,<br>-2.12) | <0.001          | (17.68,<br>23.96)  | (7.01,<br>10.30)  | (-3.50,<br>-2.42) | <0.001 |
|                                        | 169.83              | 140.36              | -0.66             |        | 1785.49                   | 1655.11                   | -0.25             |        | 1529.71                   | 1241.72                   | -0.67             | 23.60           | 18.84              | -0.73             |                   |        |
| Lao People's<br>Democratic<br>Republic | (160.62,<br>179.46) | (134.50,<br>146.42) | (-0.75,<br>-0.57) | <0.001 | (1755.23<br>,<br>1816.17) | (1634.80<br>,<br>1675.63) | (-0.29,<br>-0.21) | <0.001 | (1500.99<br>,<br>1558.87) | (1223.96<br>,<br>1259.69) | (-0.93,<br>-0.42) | <0.001          | (20.12,<br>27.54)  | (16.69,<br>21.18) | (-1.02,<br>-0.44) | <0.001 |
|                                        | 88.50               | 88.90               | 0.02              |        | 769.84                    | 820.24                    | 0.27              |        | 656.26                    | 398.31                    | -1.62             | 9.95            | 5.29               | -2.07             |                   |        |
| Latvia                                 | (80.40,<br>97.24)   | (78.39,<br>100.61)  | (-0.01,<br>0.05)  | 0.151  | (745.64,<br>794.66)       | (788.03,<br>853.60)       | (0.10,<br>0.44)   | 0.002  | (633.93,<br>679.23)       | (376.08,<br>421.71)       | (-3.01,<br>-0.22) | 0.024           | (7.38,<br>13.18)   | (3.06,<br>8.83)   | (-3.73,<br>-0.37) | 0.017  |
|                                        | 84.05               | 84.01               | 0.01              |        | 1288.83                   | 1345.12                   | 0.16              |        | 1070.61                   | 637.41                    | -1.75             | 16.54           | 8.85               | -2.12             |                   |        |
| Lebanon                                | (76.68,<br>91.95)   | (78.60,<br>89.74)   | (-0.03,<br>0.05)  | 0.676  | (1259.71<br>,<br>1318.47) | (1322.82<br>,<br>1367.75) | (0.11,<br>0.20)   | <0.001 | (1043.87<br>,<br>1097.87) | (622.19,<br>652.95)       | (-1.85,<br>-1.66) | <0.001          | (13.35,<br>20.28)  | (7.15,<br>10.87)  | (-2.24,<br>-2.00) | <0.001 |
|                                        | 166.71              | 176.70              | 0.21              |        | 2465.55                   | 2530.42                   | 0.10              |        | 668.54                    | 834.69                    | 0.66              | 8.75            | 11.65              | 0.84              |                   |        |
| Lesotho                                | (153.35,<br>181.04) | (164.78,<br>189.28) | (0.18,<br>0.23)   | <0.001 | (2412.72<br>,<br>2519.34) | (2484.66<br>,<br>2576.84) | (0.04,<br>0.17)   | 0.003  | (640.28,<br>697.82)       | (808.04,<br>862.01)       | (0.33,<br>1.00)   | <0.001          | (5.74,<br>12.87)   | (8.67,<br>15.35)  | (0.37,<br>1.31)   | <0.001 |
|                                        | 151.12              | 153.82              | 0.06              |        | 2413.53                   | 2590.60                   | 0.26              |        | 1105.19                   | 876.25                    | -0.78             | 16.22           | 12.18              | -0.96             |                   |        |
| Liberia                                | (138.57,<br>164.54) | (146.19,<br>161.76) | (0.05,<br>0.07)   | <0.001 | (2362.39<br>,<br>,        | (2558.91<br>,<br>,        | (0.20,<br>0.31)   | <0.001 | (1070.21<br>,<br>,        | (857.50,<br>895.33)       | (-0.88,<br>-0.67) | <0.001          | (12.21,<br>21.15)  | (10.04,<br>14.65) | (-1.09,<br>-0.84) | <0.001 |

|            |          |          |         |        |          |          |         |        |          |          |         |        |         |         |         |        |
|------------|----------|----------|---------|--------|----------|----------|---------|--------|----------|----------|---------|--------|---------|---------|---------|--------|
|            |          |          |         |        | 2465.52) | 2622.60) |         |        | 1141.05) |          |         |        |         |         |         |        |
|            |          |          |         |        | 1876.95  | 2111.48  |         |        | 1534.33  | 1173.10  |         |        |         |         |         |        |
|            | 124.89   | 136.32   | 0.30    |        |          |          | 0.41    |        |          |          | -0.87   |        | 23.70   | 17.22   | -1.01   |        |
| Libya      | (116.39, | (130.45, | (0.26,  | <0.001 | (1843.77 | (2088.14 | (0.33,  | <0.001 | (1503.83 | (1155.82 | (-1.42, | 0.002  | (19.99, | (15.19, | (-1.72, | 0.006  |
|            | 133.90)  | 142.41)  | 0.33)   |        | ,        | ,        | 0.50)   |        | ,        | ,        | -0.33)  |        | 27.95)  | 19.45)  | -0.29)  |        |
|            |          |          |         |        | 1910.63) | 2135.02) |         |        | 1565.34) | 1190.59) |         |        |         |         |         |        |
|            |          |          |         |        | 1144.07  | 1140.08  |         |        | 556.45   | 378.60   | -1.23   |        | 7.70    | 4.67    | -1.57   |        |
| Lithuania  | (96.46,  | (92.74,  | (-0.11, | 0.085  | (1119.22 | (1108.26 | (-0.09, | 0.712  | (539.16, | (360.52, | (-2.56, | 0.072  | (5.79,  | (2.89,  | (-3.41, | 0.099  |
|            | 111.65)  | 112.17)  | 0.01)   |        | ,        | ,        | 0.13)   |        | 574.18)  | 397.46)  | 0.11)   |        | 10.07)  | 7.32)   | 0.30)   |        |
|            |          |          |         |        | 1169.36) | 1172.67) |         |        |          |          |         |        |         |         |         |        |
|            |          |          |         |        | 1244.54  | 1256.22  |         |        | 444.45   | 215.37   | -2.45   |        | 6.08    | 2.12    | -3.74   |        |
| Luxembourg | (38.96,  | (40.85,  | (-0.06, | 0.014  | (1165.21 | (1189.78 | (-0.02, | 0.157  | (398.13, | (188.56, | (-2.86, | <0.001 | (1.88,  | (0.33,  | (-4.33, | <0.001 |
|            | 74.64)   | 69.92)   | -0.01)  |        | ,        | ,        | 0.12)   |        | 495.48)  | 245.42)  | -2.05)  |        | 16.19)  | 8.11)   | -3.15)  |        |
|            |          |          |         |        | 1328.58) | 1325.83) |         |        |          |          |         |        |         |         |         |        |
|            |          |          |         |        | 3618.25  | 3841.25  |         |        | 2602.80  | 1692.04  | -1.43   |        | 40.66   | 25.06   | -1.60   |        |
| Madagascar | (204.47, | (198.32, | (-0.20, | <0.001 | (3592.90 | (3824.56 | (0.18,  | <0.001 | (2580.52 | (1680.59 | (-1.82, | <0.001 | (37.88, | (23.66, | (-2.04, | <0.001 |
|            | 216.81)  | 205.97)  | -0.11)  |        | ,        | ,        | 0.25)   |        | ,        | ,        | -1.04)  |        | 43.60)  | 26.51)  | -1.16)  |        |
|            |          |          |         |        | 3643.74) | 3858.00) |         |        | 2625.24) | 1703.54) |         |        |         |         |         |        |
|            |          |          |         |        | 3205.89  | 3366.66  |         |        | 1161.80  | 686.33   | -1.75   |        | 16.43   | 8.11    | -2.34   |        |
| Malawi     | (187.25, | (186.41, | (-0.07, | <0.001 | (3179.46 | (3348.13 | (0.11,  | <0.001 | (1145.29 | (677.75, | (-1.90, | <0.001 | (14.49, | (7.18,  | (-2.53, | <0.001 |
|            | 200.18)  | 195.09)  | -0.04)  |        | ,        | ,        | 0.26)   |        | ,        | 695.00)  | -1.61)  |        | 18.58)  | 9.13)   | -2.14)  |        |
|            |          |          |         |        | 3232.50) | 3385.27) |         |        | 1178.50) |          |         |        |         |         |         |        |
|            |          |          |         |        | 2079.96  | 2079.86  |         |        | 937.40   | 579.98   | -1.64   |        | 12.74   | 6.80    | -2.12   |        |
| Malaysia   | (117.84, | (111.14, | (-0.26, | <0.001 | (2065.09 | (2068.83 | (-0.03, | 0.810  | (927.36, | (574.15, | (-1.88, | <0.001 | (11.59, | (6.18,  | (-2.46, | <0.001 |
|            | 125.05)  | 116.33)  | -0.18)  |        | ,        | ,        | 0.04)   |        | 947.54)  | 585.85)  | -1.39)  |        | 13.99)  | 7.46)   | -1.78)  |        |
|            |          |          |         |        | 2094.91) | 2090.95) |         |        |          |          |         |        |         |         |         |        |
|            |          |          |         |        | 1604.07  | 1524.62  |         |        | 1479.24  | 376.00   | -4.59   |        | 22.89   | 4.07    | -5.78   |        |
| Maldives   | (87.44,  | (82.70,  | (-0.62, | <0.001 | (1473.27 | (1444.76 | (-0.20, | <0.001 | (1349.70 | (337.28, | (-4.84, | <0.001 | (9.32,  | (1.07,  | (-6.05, | <0.001 |
|            | 165.27)  | 127.12)  | -0.51)  |        | ,        | ,        | -0.09)  |        | ,        | 418.49)  | -4.34)  |        | 48.72)  | 11.79)  | -5.51)  |        |
|            |          |          |         |        | 1744.81) | 1608.22) |         |        | 1619.09) |          |         |        |         |         |         |        |
|            |          |          |         |        | 2821.45  | 2858.63  |         |        | 1935.59  | 1239.43  | -1.50   |        | 30.23   | 18.23   | -1.73   |        |
| Mali       | (172.56, | (161.41, | (-0.29, | <0.001 | (2794.86 | (2842.02 | (0.03,  | <0.001 | (1912.92 | (1228.03 | (-1.73, | <0.001 | (27.43, | (16.85, | (-2.03, | <0.001 |
|            | 186.12)  | 169.44)  | -0.27)  |        | ,        | ,        | 0.07)   |        | ,        | ,        | -1.26)  |        | 33.26)  | 19.70)  | -1.44)  |        |
|            |          |          |         |        | 2848.24) | 2875.32) |         |        | 1958.47) | 1250.91) |         |        |         |         |         |        |

|                   |          |          |         |        |          |          |         |        |          |          |         |        |         |         |         |        |
|-------------------|----------|----------|---------|--------|----------|----------|---------|--------|----------|----------|---------|--------|---------|---------|---------|--------|
|                   | 53.46    | 51.01    | -0.16   |        | 769.58   | 737.06   | -0.11   |        | 421.86   | 243.67   | -1.84   |        | 6.04    | 3.03    | -2.33   |        |
| Malta             | (37.70,  | (35.59,  | (-0.21, | <0.001 | (705.70, | (674.47, | (-0.33, | 0.325  | (375.20, | (208.20, | (-2.21, | <0.001 | (1.75,  | (0.41,  | (-2.79, | <0.001 |
|                   | 74.05)   | 71.88)   | -0.10)  |        | 838.03)  | 804.69)  | 0.11)   |        | 473.10)  | 284.30)  | -1.46)  |        | 15.74)  | 12.49)  | -1.86)  |        |
|                   | 172.64   | 181.34   | 0.17    |        | 1812.45  | 1864.85  | 0.10    |        | 2264.11  | 2870.36  | 0.81    |        | 36.08   | 46.50   | 0.87    |        |
| Marshall Islands  | (92.52,  | (111.90, | (0.14,  | <0.001 | (1525.59 | (1623.43 | (0.07,  | <0.001 | (1934.63 | (2567.96 | (0.72,  | <0.001 | (6.40,  | (15.74, | (0.78,  | <0.001 |
|                   | 297.72)  | 278.36)  | 0.21)   |        | ,        | ,        | 0.12)   |        | ,        | ,        | 0.90)   |        | 116.46) | 106.60) | 0.95)   |        |
|                   | 151.39   | 140.44   | -0.26   |        | 2655.50  | 2694.86  | 0.05    |        | 1138.54  | 646.24   | -1.90   |        | 16.49   | 8.04    | -2.41   |        |
| Mauritania        | (139.22, | (132.34, | (-0.28, | <0.001 | (2603.78 | (2658.88 | (0.01,  | 0.025  | (1103.90 | (628.22, | (-2.01, | <0.001 | (12.52, | (6.11,  | (-2.54, | <0.001 |
|                   | 164.40)  | 148.94)  | -0.24)  |        | ,        | ,        | 0.10)   |        | ,        | 664.66)  | -1.79)  |        | 21.38)  | 10.40)  | -2.27)  |        |
|                   | 119.72   | 109.87   | -0.30   |        | 1885.09  | 1806.25  | -0.13   |        | 1166.50  | 656.95   | -1.96   |        | 17.07   | 8.53    | -2.38   |        |
| Mauritius         | (106.38, | (96.82,  | (-0.31, | <0.001 | (1831.06 | (1752.16 | (-0.17, | <0.001 | (1123.91 | (624.74, | (-2.32, | <0.001 | (12.27, | (5.24,  | (-2.84, | <0.001 |
|                   | 134.30)  | 124.23)  | -0.28)  |        | ,        | ,        | -0.10)  |        | ,        | 690.43)  | -1.60)  |        | 23.17)  | 13.20)  | -1.91)  |        |
|                   | 114.03   | 95.43    | -0.61   |        | 1785.34  | 1646.77  | -0.27   |        | 672.81   | 412.49   | -1.59   |        | 9.61    | 5.24    | -1.98   |        |
| Mexico            | (112.43, | (94.23,  | (-0.65, | <0.001 | (1778.98 | (1641.80 | (-0.34, | <0.001 | (668.84, | (410.01, | (-2.15, | <0.001 | (9.14,  | (4.97,  | (-2.67, | <0.001 |
|                   | 115.64)  | 96.63)   | -0.57)  |        | ,        | ,        | -0.21)  |        | 676.81)  | 414.99)  | -1.03)  |        | 10.11)  | 5.53)   | -1.29)  |        |
|                   | 196.63   | 165.21   | -0.60   |        | 1908.77  | 1774.29  | -0.24   |        | 2730.73  | 2566.68  | -0.22   |        | 43.84   | 41.10   | -0.23   |        |
| Micronesia        | (136.94, | (112.77, | (-0.64, | <0.001 | (1712.52 | (1591.61 | (-0.28, | <0.001 | (2490.33 | (2342.47 | (-0.29, | <0.001 | (18.30, | (17.30, | (-0.31, | <0.001 |
| (Federated States | 274.92)  | 234.59)  | -0.56)  |        | ,        | ,        | -0.20)  |        | ,        | ,        | -0.15)  |        | 89.70)  | 83.23)  | -0.15)  |        |
| of)               | 57.98    | 61.17    | 0.19    |        | 685.47   | 719.90   | 0.20    |        | 381.48   | 244.92   | -1.52   |        | 5.45    | 3.14    | -1.88   |        |
| Monaco            | (10.89,  | (12.21,  | (0.18,  | <0.001 | (470.83, | (500.90, | (0.01,  | 0.038  | (226.75, | (125.90, | (-1.64, | <0.001 | (0.00,  | (0.00,  | (-1.98, | <0.001 |
|                   | 209.52)  | 189.85)  | 0.21)   |        | 983.83)  | 1007.69) | 0.39)   |        | 623.25)  | 436.12)  | -1.39)  |        | 133.90) | 96.76)  | -1.78)  |        |
|                   | 181.59   | 160.86   | -0.42   |        | 2062.84  | 2013.76  | -0.07   |        | 2116.36  | 1185.81  | -2.03   |        | 34.24   | 18.04   | -2.25   |        |
| Mongolia          | (168.62, | (151.38, | (-0.43, | <0.001 | (2018.35 | (1980.16 | (-0.13, | 0.045  | (2069.39 | (1160.72 | (-2.79, | <0.001 | (28.42, | (15.09, | (-3.08, | <0.001 |
|                   | 195.40)  | 170.84)  | -0.41)  |        | ,        | ,        | -0.00)  |        | ,        | ,        | -1.26)  |        | 40.99)  | 21.48)  | -1.41)  |        |
|                   | 89.12    | 86.17    | -0.11   |        | 1071.07  | 1064.53  | 0.00    |        | 655.36   | 515.74   | -0.68   |        | 9.28    | 6.96    | -0.80   |        |
| Montenegro        | (73.17,  | (69.51,  | (-0.17, | <0.001 | (1013.80 | (1003.55 | (-0.12, | 0.946  | (610.79, | (473.93, | (-1.53, | 0.123  | (4.70,  | (2.95,  | (-1.90, | 0.162  |
|                   | 107.54)  | 105.86)  | -0.06)  |        | ,        | ,        | 0.13)   |        | 702.35)  | 560.47)  | 0.18)   |        | 16.50)  | 14.28)  | 0.32)   |        |



|             |          |          |         |        |          |          |         |        |          |          |         |        |         |         |         |        |
|-------------|----------|----------|---------|--------|----------|----------|---------|--------|----------|----------|---------|--------|---------|---------|---------|--------|
|             |          |          |         |        | 1130.76) | 1128.45) |         |        |          |          |         |        |         |         |         |        |
|             |          |          |         |        | 1923.61  | 1967.61  |         |        | 1476.30  |          |         |        |         |         |         |        |
|             | 145.27   | 145.10   | -0.01   |        |          |          |         |        |          |          |         |        |         |         |         |        |
|             | (141.92, | (142.36, | (-0.02, | 0.598  | (1911.37 | (1957.47 | 0.09    | 0.009  | (1465.42 | 989.02   | -1.34   | <0.001 | 22.89   | 14.47   | -1.52   | <0.001 |
| Morocco     | 148.69)  | 147.88)  | 0.01)   |        | ,        | ,        | 0.16)   |        | ,        | 996.23)  | -1.11)  |        | 24.31)  | 15.37)  | -1.25)  |        |
|             |          |          |         |        | 1935.93) | 1977.78) |         |        | 1487.25) |          |         |        |         |         |         |        |
|             |          |          |         |        | 3153.36  | 3336.19  |         |        |          |          |         |        |         |         |         |        |
|             | 195.34   | 194.54   | -0.02   |        |          |          | 0.21    |        | 786.96   | 688.51   | -0.46   |        | 10.10   | 8.19    | -0.73   |        |
|             | (189.89, | (190.97, | (-0.05, | 0.050  | (3131.06 | (3321.05 | (0.12,  | <0.001 | (775.57, | (681.38, | (-0.64, | <0.001 | (8.83,  | (7.41,  | (-0.95, | <0.001 |
| Mozambique  | 200.91)  | 198.17)  | 0.00)   |        | ,        | ,        | 0.30)   |        | 798.47)  | 695.70)  | -0.28)  |        | 11.50)  | 9.04)   | -0.52)  |        |
|             |          |          |         |        | 3175.79) | 3351.40) |         |        |          |          |         |        |         |         |         |        |
|             |          |          |         |        | 1753.87  | 1630.42  |         |        | 2829.55  | 1102.88  |         |        |         |         |         |        |
|             | 142.09   | 123.42   | -0.48   |        |          |          | -0.24   |        |          |          |         |        | 46.40   | 16.60   | -3.50   |        |
|             | (139.55, | (121.39, | (-0.56, | <0.001 | (1744.83 | (1623.01 | (-0.37, | <0.001 | (2817.85 | (1096.79 | (-3.36, | <0.001 | (44.90, | (15.86, | (-3.66, | <0.001 |
| Myanmar     | 144.67)  | 125.48)  | -0.41)  |        | ,        | ,        | -0.12)  |        | ,        | ,        | -3.06)  |        | 47.94)  | 17.37)  | -3.35)  |        |
|             |          |          |         |        | 1762.96) | 1637.86) |         |        | 2841.29) | 1109.00) |         |        |         |         |         |        |
|             |          |          |         |        | 2593.68  | 2582.72  |         |        | 804.68   | 490.52   | -1.67   |        | 10.99   | 5.53    | -2.30   |        |
|             | 162.75   | 152.58   | -0.22   |        |          |          | -0.01   |        |          |          |         |        |         |         |         |        |
|             | (147.97, | (142.13, | (-0.24, | <0.001 | (2533.13 | (2538.99 | (-0.03, | 0.146  | (769.69, | (471.31, | (-1.99, | <0.001 | (7.18,  | (3.65,  | (-2.80, | <0.001 |
| Namibia     | 178.76)  | 163.63)  | -0.21)  |        | ,        | ,        | 0.01)   |        | 840.96)  | 510.35)  | -1.35)  |        | 16.22)  | 8.08)   | -1.80)  |        |
|             |          |          |         |        | 2655.45) | 2627.05) |         |        |          |          |         |        |         |         |         |        |
|             |          |          |         |        | 1209.44  | 1166.77  |         |        | 3022.44  | 3416.50  |         |        |         |         |         |        |
|             | 150.15   | 142.23   | -0.16   |        |          |          | -0.11   |        |          |          |         |        | 49.65   | 56.43   | 0.43    |        |
|             | (29.54,  | (29.90,  | (-0.35, | 0.085  | (768.49, | (756.09, | (-0.26, | 0.154  | (2293.43 | (2679.24 | 0.41    | 0.002  | (1.03,  | (2.42,  | (0.16,  | 0.002  |
| Nauru       | 456.88)  | 420.56)  | 0.02)   |        | 1817.29) | 1726.26) | 0.04)   |        | ,        | ,        | 0.67)   |        | 298.21) | 287.23) | 0.71)   |        |
|             |          |          |         |        |          |          |         |        | 3914.50) | 4298.66) |         |        |         |         |         |        |
|             |          |          |         |        | 1395.98  | 1395.52  |         |        | 1296.72  |          |         |        |         |         |         |        |
|             | 127.96   | 121.56   | -0.17   |        |          |          | 0.01    |        |          |          |         |        | 20.88   | 8.78    | -2.94   |        |
|             | (124.32, | (119.00, | (-0.24, | <0.001 | (1383.66 | (1386.70 | (-0.03, | 0.593  | (1284.63 | 600.17   | -2.63   |        | (19.36, | (8.08,  | (-3.13, | <0.001 |
| Nepal       | 131.68)  | 124.16)  | -0.09)  |        | ,        | ,        | 0.05)   |        | ,        | 606.08)  | -2.46)  |        | 22.50)  | 9.53)   | -2.76)  |        |
|             |          |          |         |        | 1408.39) | 1404.39) |         |        | 1308.91) |          |         |        |         |         |         |        |
|             |          |          |         |        | 1006.42  | 1047.10  |         |        | 375.58   | 194.82   | -2.23   |        | 5.17    | 2.00    | -3.12   |        |
|             | 76.16    | 68.91    | -0.33   |        |          |          | 0.14    |        |          |          |         |        |         |         |         |        |
|             | (73.09,  | (65.79,  | (-0.39, | <0.001 | (995.11, | (1034.79 | (0.08,  | <0.001 | (368.71, | (189.56, | (-2.62, | <0.001 | (4.39,  | (1.50,  | (-3.91, | <0.001 |
| Netherlands | 79.34)   | 72.15)   | -0.27)  |        | 1017.83) | ,        | 0.20)   |        | 382.55)  | 200.21)  | -1.85)  |        | 6.05)   | 2.62)   | -2.33)  |        |
|             |          |          |         |        |          | 1059.53) |         |        |          |          |         |        |         |         |         |        |
|             |          |          |         |        | 696.20   | 707.40   |         |        | 455.66   | 239.15   | -2.21   |        | 6.78    | 2.94    | -2.95   |        |
|             | 80.03    | 71.11    | -0.40   |        |          |          | 0.06    |        |          |          |         |        |         |         |         |        |
|             | (73.54,  | (65.13,  | (-0.44, | <0.001 | (676.79, | (688.30, | (-0.07, | 0.365  | (439.98, | (228.11, | (-2.59, | <0.001 | (4.99,  | (1.84,  | (-3.43, | <0.001 |
| New Zealand | 86.95)   | 77.51)   | -0.35)  |        | 716.04)  | 726.91)  | 0.20)   |        | 471.77)  | 250.61)  | -1.84)  |        | 9.01)   | 4.49)   | -2.47)  |        |
|             |          |          |         |        |          |          |         |        |          |          |         |        |         |         |         |        |
|             | 146.86   | 141.38   | -0.13   | <0.001 | 2390.43  | 2437.84  | 0.10    | 0.029  | 750.32   | 449.39   | -1.82   | <0.001 | 10.57   | 5.30    | -2.44   | <0.001 |
| Nicaragua   |          |          |         |        |          |          |         |        |          |          |         |        |         |         |         |        |

|                             |                        |                        |                   |        |                           |                           |                  |        |                           |                      |                   |                  |                   |                   |                   |        |
|-----------------------------|------------------------|------------------------|-------------------|--------|---------------------------|---------------------------|------------------|--------|---------------------------|----------------------|-------------------|------------------|-------------------|-------------------|-------------------|--------|
|                             | (138.19,<br>155.99)    | (135.21,<br>147.75)    | (-0.16,<br>-0.10) |        | (2354.42<br>,<br>2426.89) | (2411.97<br>,<br>2463.92) | (0.01,<br>0.19)  |        | (729.63,<br>771.48)       | (438.27,<br>460.73)  | (-2.52,<br>-1.11) | (8.21,<br>13.44) | (4.15,<br>6.67)   | (-3.37,<br>-1.50) |                   |        |
|                             | 148.22                 | 145.26                 | -0.07             |        | 2506.63                   | 2671.24                   | 0.24             |        | 1156.34                   | 861.85               | -1.04             | 17.02            | 11.87             | -1.26             |                   |        |
| Niger                       | (141.80,<br>154.89)    | (141.42,<br>149.18)    | (-0.09,<br>-0.06) | <0.001 | (2480.04<br>,<br>2533.45) | (2654.68<br>,<br>2687.89) | (0.13,<br>0.35)  | <0.001 | (1137.63<br>,<br>1175.32) | (852.02,<br>871.76)  | (-1.32,<br>-0.77) | <0.001           | (14.78,<br>19.52) | (10.72,<br>13.12) | (-1.65,<br>-0.88) | <0.001 |
|                             | 136.37                 | 138.77                 | 0.07              |        | 2721.64                   | 3019.95                   | 0.37             |        | 890.19                    | 601.14               | -1.36             | 12.29            | 7.02              | -1.92             |                   |        |
| Nigeria                     | (134.57,<br>138.19)    | (137.65,<br>139.89)    | (0.04,<br>0.09)   | <0.001 | (2713.56<br>,<br>2729.74) | (3014.71<br>,<br>3025.21) | (0.34,<br>0.40)  | <0.001 | (885.36,<br>895.03)       | (598.72,<br>603.57)  | (-1.50,<br>-1.22) | <0.001           | (11.71,<br>12.88) | (6.76,<br>7.29)   | (-2.16,<br>-1.68) | <0.001 |
|                             | 102.44                 | 101.87                 | -0.02             |        | 1066.24                   | 1085.25                   | 0.07             |        | 1452.07                   | 1266.89              | -0.47             | 22.68            | 19.32             | -0.55             |                   |        |
| Niue                        | (0.01,<br>1240.07<br>) | (0.00,<br>1657.91<br>) | (-0.04,<br>0.01)  | 0.196  | (286.43,<br>2772.19)      | (220.43,<br>3258.83)      | (0.01,<br>0.14)  | 0.026  | (492.47,<br>3324.51)      | (300.96,<br>3530.04) | (-0.69,<br>-0.24) | <0.001           | 1085.97<br>)      | 1499.66<br>)      | (-0.78,<br>-0.31) | <0.001 |
|                             | 90.49                  | 80.81                  | -0.39             |        | 957.10                    | 940.63                    | -0.03            |        | 1061.58                   | 588.45               | -2.00             | 16.09            | 8.11              | -2.34             |                   |        |
| North Macedonia             | (81.41,<br>100.33)     | (72.16,<br>90.35)      | (-0.43,<br>-0.36) | <0.001 | (927.03,<br>987.92)       | (910.51,<br>971.62)       | (-0.20,<br>0.14) | 0.732  | (1029.88<br>,<br>1094.02) | (564.61,<br>613.15)  | (-2.90,<br>-1.09) | <0.001           | (12.40,<br>20.54) | (5.56,<br>11.61)  | (-3.33,<br>-1.34) | <0.001 |
|                             | 138.56                 | 128.59                 | -0.26             |        | 1906.69                   | 1922.71                   | 0.03             |        | 1454.99                   | 937.98               | -1.48             | 21.97            | 13.04             | -1.75             |                   |        |
| Northern Mariana<br>Islands | (79.37,<br>226.90)     | (49.97,<br>284.78)     | (-0.27,<br>-0.24) | <0.001 | (1663.37<br>,<br>2177.19) | (1566.87<br>,<br>2344.92) | (0.00,<br>0.06)  | 0.038  | (1244.04<br>,<br>1693.14) | (682.81,<br>1264.87) | (-1.67,<br>-1.28) | <0.001           | (3.74,<br>73.01)  | (0.04,<br>121.51) | (-1.98,<br>-1.52) | <0.001 |
|                             | 92.82                  | 90.15                  | -0.10             |        | 1009.86                   | 1090.63                   | 0.27             |        | 321.62                    | 146.19               | -2.71             | 4.30             | 1.17              | -4.43             |                   |        |
| Norway                      | (86.25,<br>99.78)      | (84.00,<br>96.66)      | (-0.18,<br>-0.01) | 0.025  | (987.88,<br>1032.22)      | (1068.91<br>,<br>1112.70) | (0.21,<br>0.33)  | <0.001 | (309.28,<br>334.35)       | (138.29,<br>154.45)  | (-3.02,<br>-2.40) | <0.001           | (2.98,<br>6.01)   | (0.57,<br>2.17)   | (-4.92,<br>-3.94) | <0.001 |
|                             | 89.58                  | 86.04                  | -0.13             |        | 1295.68                   | 1435.66                   | 0.38             |        | 1175.69                   | 710.19               | -1.56             | 18.16            | 9.80              | -1.97             |                   |        |
| Oman                        | (78.61,<br>101.73)     | (79.77,<br>92.74)      | (-0.20,<br>-0.06) | <0.001 | (1253.33<br>,<br>1339.15) | (1409.13<br>,<br>1462.60) | (0.31,<br>0.45)  | <0.001 | (1135.11<br>,<br>1217.40) | (691.59,<br>729.20)  | (-1.77,<br>-1.35) | <0.001           | (13.40,<br>24.12) | (7.74,<br>12.30)  | (-2.21,<br>-1.73) | <0.001 |
|                             | 186.39                 | 190.10                 | 0.08              |        | 2125.51                   | 2232.13                   | 0.18             |        | 1711.10                   | 1800.97              | 0.19              | 27.13            | 28.50             | 0.18              |                   |        |
| Pakistan                    | (184.42,<br>)          | (188.81,<br>)          | (-0.05,<br>)      | 0.232  | (2118.68<br>)             | (2227.62<br>)             | (0.08,<br>)      | <0.001 | (1704.81<br>)             | (1796.85<br>)        | (0.10,<br>)       | <0.001           | (26.34,<br>)      | (27.98,<br>)      | (0.09,<br>)       | <0.001 |

|                  |          |          |         |        |          |          |        |       |          |          |         |        |         |         |         |        |
|------------------|----------|----------|---------|--------|----------|----------|--------|-------|----------|----------|---------|--------|---------|---------|---------|--------|
|                  | 188.39)  | 191.39)  | 0.21)   |        | ,        | ,        | 0.28)  |       | ,        | ,        | 0.28)   |        | 27.95)  | 29.03)  | 0.28)   |        |
|                  |          |          |         |        | 2132.36) | 2236.64) |        |       | 1717.41) | 1805.09) |         |        |         |         |         |        |
|                  | 92.72    | 94.96    | 0.09    |        | 1128.59  | 1162.94  | 0.12   |       | 1288.20  | 1145.40  | -0.41   |        | 19.88   | 17.28   | -0.49   |        |
| Palau            | (19.29,  | (15.31,  | (0.06,  | <0.001 | (794.51, | (783.52, | (0.01, | 0.040 | (927.80, | (770.86, | (-0.48, | <0.001 | (0.08,  | (0.01,  | (-0.56, | <0.001 |
|                  | 274.55)  | 325.26)  | 0.12)   |        | 1558.84) | 1672.20) | 0.24)  |       | 1744.87) | 1649.16) | -0.34)  |        | 158.25) | 200.76) | -0.42)  |        |
|                  |          |          |         |        | 1997.70  | 2051.98  |        |       | 803.82   | 519.39   | -1.49   |        | 11.30   | 6.30    | -1.98   |        |
| Palestine        | 126.10   | 121.85   | -0.12   |        | (1948.99 | (2023.27 | 0.11   |       | (772.42, | (504.88, | (-1.72, | <0.001 | (7.80,  | (4.78,  | (-2.15, | <0.001 |
|                  | (114.16, | (114.97, | (-0.15, | <0.001 |          |          |        |       | 836.25)  | 534.25)  | -1.25)  |        | 15.93)  | 8.18)   | -1.81)  |        |
|                  | 139.05)  | 129.07)  | -0.09)  |        | 2047.42) | 2081.01) | 0.20)  |       |          |          |         |        |         |         |         |        |
|                  |          |          |         |        | 2311.37  | 2307.07  |        |       | 709.77   | 442.37   | -1.59   |        | 9.80    | 5.23    | -2.09   |        |
| Panama           | 134.13   | 127.41   | -0.17   |        | (2268.68 | (2273.61 | 0.01   |       | (685.91, | (427.77, | (-2.42, | <0.001 | (7.16,  | (3.75,  | (-3.25, | <0.001 |
|                  | (124.09, | (119.65, | (-0.21, | <0.001 |          |          |        |       | 734.29)  | 457.35)  | -0.75)  |        | 13.15)  | 7.10)   | -0.93)  |        |
|                  | 144.82)  | 135.56)  | -0.13)  |        | 2354.70) | 2340.90) | 0.12)  |       |          |          |         |        |         |         |         |        |
|                  |          |          |         |        | 1641.37  | 1711.64  |        |       | 1627.56  | 1756.86  | 0.22    |        | 25.00   | 27.11   | 0.23    |        |
| Papua New Guinea | 159.63   | 167.05   | 0.16    |        | (1612.31 | (1693.35 | 0.16   |       | (1598.26 | (1738.25 | (-0.03, | 0.088  | (21.45, | (24.83, | (-0.05, | 0.101  |
|                  | (150.63, | (161.37, | (0.13,  | <0.001 |          |          |        |       |          |          | 0.47)   |        | (21.45, | (24.83, | (-0.05, | 0.101  |
|                  | 169.05)  | 172.89)  | 0.19)   |        | 1670.86) | 1730.08) | 0.22)  |       | 1657.28) | 1775.62) |         |        | 28.99)  | 29.54)  | 0.51)   |        |
|                  |          |          |         |        | 2277.70  | 2338.01  |        |       | 828.69   | 491.29   | -1.66   |        | 12.08   | 6.18    | -2.12   |        |
| Paraguay         | 136.48   | 131.30   | -0.13   |        | (2243.76 | (2313.21 | 0.10   |       | (807.78, | (479.88, | (-2.29, | <0.001 | (9.65,  | (4.96,  | (-3.09, | <0.001 |
|                  | (128.32, | (125.47, | (-0.16, | <0.001 |          |          |        |       | 850.03)  | 502.91)  | -1.03)  |        | 14.95)  | 7.62)   | -1.14)  |        |
|                  | 145.06)  | 137.33)  | -0.10)  |        | 2312.06) | 2363.03) | 0.16)  |       |          |          |         |        |         |         |         |        |
|                  |          |          |         |        | 2229.11  | 2292.89  |        |       | 1042.79  | 488.15   | -2.49   |        | 15.37   | 5.88    | -3.12   |        |
| Peru             | 130.04   | 119.51   | -0.29   |        | (2215.00 | (2281.50 | 0.10   |       | (1033.03 | (482.91, | (-3.53, | <0.001 | (14.19, | (5.32,  | (-4.39, | <0.001 |
|                  | (126.69, | (116.91, | (-0.31, | <0.001 |          |          |        |       |          | 493.44)  | -1.45)  |        | 16.62)  | 6.49)   | -1.83)  |        |
|                  | 133.46)  | 122.16)  | -0.28)  |        | 2243.28) | 2304.33) | 0.12)  |       | 1052.63) |          |         |        |         |         |         |        |
|                  |          |          |         |        | 1367.66  | 1489.10  |        |       | 495.39   | 1188.84  | 3.17    |        | 6.12    | 17.94   | 3.91    |        |
| Philippines      | 126.93   | 132.78   | 0.15    |        | (1361.04 | (1484.00 | 0.30   |       | (491.35, | (1184.25 | (2.71,  | <0.001 | (5.68,  | (17.37, | (3.32,  | <0.001 |
|                  | (124.93, | (131.27, | (0.15,  | <0.001 |          |          |        |       | 499.45)  |          | 3.62)   |        | 6.60)   | 18.51)  | 4.50)   |        |
|                  | 128.96)  | 134.32)  | 0.16)   |        | 1374.31) | 1494.21) | 0.37)  |       |          | 1193.44) |         |        |         |         |         |        |
|                  |          |          |         |        | 1322.98  | 1352.28  |        |       | 684.64   | 288.33   | -3.02   |        | 9.80    | 2.74    | -4.52   |        |
| Poland           | 77.05    | 70.86    | -0.29   |        | (1314.61 | (1343.16 | 0.09   |       | (678.81, | (284.21, | (-3.35, | <0.001 | (9.12,  | (2.36,  | (-4.92, | <0.001 |
|                  | (75.08,  | (68.82,  | (-0.34, | <0.001 |          |          |        |       | 690.51)  | 292.50)  | -2.68)  |        | 10.52)  | 3.16)   | -4.12)  |        |
|                  | 79.07)   | 72.94)   | -0.24)  |        | 1331.39) | 1361.46) | 0.26)  |       |          |          |         |        |         |         |         |        |

|                       |          |          |         |        |          |          |         |        |          |          |         |        |         |         |         |        |
|-----------------------|----------|----------|---------|--------|----------|----------|---------|--------|----------|----------|---------|--------|---------|---------|---------|--------|
|                       | 49.76    | 42.70    | -0.51   |        | 887.19   | 856.54   | -0.10   |        | 516.31   | 188.18   | -3.39   |        | 7.52    | 1.98    | -4.55   |        |
| Portugal              | (46.63,  | (39.52,  | (-0.62, | <0.001 | (873.83, | (842.09, | (-0.23, | 0.104  | (506.13, | (181.56, | (-4.02, | <0.001 | (6.33,  | (1.37,  | (-5.26, | <0.001 |
|                       | 53.04)   | 46.08)   | -0.40)  |        | 900.71)  | 871.18)  | 0.02)   |        | 526.64)  | 195.00)  | -2.76)  |        | 8.86)   | 2.79)   | -3.84)  |        |
|                       |          |          |         |        | 1137.60  | 1167.55  | 0.09    |        | 522.70   | 278.31   | -2.26   |        | 7.74    | 3.60    | -2.80   |        |
| Puerto Rico           | (101.15, | (108.04, | (0.22,  | <0.001 | (1113.18 | (1140.07 | (0.07,  | <0.001 | (506.18, | (265.03, | (-2.90, | <0.001 | (5.85,  | (2.24,  | (-3.66, | <0.001 |
|                       | 116.47)  | 125.70)  | 0.33)   |        | ,        | ,        | 0.11)   |        | 539.62)  | 292.10)  | -1.61)  |        | 10.05)  | 5.51)   | -1.94)  |        |
|                       |          |          |         |        | 1338.61  | 1257.13  | -0.22   |        | 913.56   | 366.76   | -2.93   |        | 13.45   | 4.18    | -3.71   |        |
| Qatar                 | (75.82,  | (75.41,  | (-0.55, | <0.001 | (1252.62 | (1220.07 | (-0.25, | <0.001 | (842.99, | (346.61, | (-4.16, | <0.001 | (6.23,  | (2.33,  | (-5.30, | <0.001 |
|                       | 124.83)  | 94.89)   | -0.43)  |        | ,        | ,        | -0.19)  |        | 988.93)  | 388.00)  | -1.68)  |        | 26.14)  | 7.34)   | -2.10)  |        |
|                       |          |          |         |        | 1429.41) | 1295.27) |         |        |          |          |         |        |         |         |         |        |
|                       | 78.47    | 69.26    | -0.42   |        | 828.35   | 777.31   | -0.17   |        | 934.78   | 171.97   | -5.72   |        | 14.33   | 1.71    | -7.14   |        |
| Republic of Korea     | (76.75,  | (67.51,  | (-0.50, | <0.001 | (822.74, | (771.46, | (-0.26, | <0.001 | (928.82, | (169.19, | (-6.16, | <0.001 | (13.60, | (1.45,  | (-7.76, | <0.001 |
|                       | 80.22)   | 71.06)   | -0.35)  |        | 834.00)  | 783.21)  | -0.09)  |        | 940.77)  | 174.78)  | -5.27)  |        | 15.09)  | 2.01)   | -6.51)  |        |
|                       | 97.84    | 93.61    | -0.14   |        | 857.43   | 862.51   | 0.02    |        | 665.60   | 366.35   | -2.01   |        | 9.93    | 4.72    | -2.46   |        |
| Republic of Moldova   | (91.58,  | (86.50,  | (-0.17, | <0.001 | (838.77, | (840.76, | (-0.02, | 0.284  | (649.08, | (352.23, | (-2.98, | <0.001 | (8.02,  | (3.27,  | (-3.62, | <0.001 |
|                       | 104.44)  | 101.25)  | -0.11)  |        | 876.43)  | 884.77)  | 0.07)   |        | 682.45)  | 380.98)  | -1.03)  |        | 12.20)  | 6.72)   | -1.28)  |        |
|                       | 81.30    | 84.24    | 0.13    |        | 890.51   | 956.21   | 0.28    |        | 740.21   | 430.03   | -1.82   |        | 11.07   | 5.60    | -2.31   |        |
| Romania               | (78.63,  | (80.91,  | (0.10,  | <0.001 | (881.62, | (944.99, | (0.08,  | 0.006  | (732.13, | (422.53, | (-2.36, | <0.001 | (10.11, | (4.78,  | (-2.88, | <0.001 |
|                       | 84.06)   | 87.67)   | 0.15)   |        | 899.48)  | 967.54)  | 0.48)   |        | 748.35)  | 437.63)  | -1.28)  |        | 12.11)  | 6.52)   | -1.73)  |        |
|                       | 102.20   | 106.20   | 0.12    |        | 943.01   | 1022.47  | 0.31    |        | 688.70   | 870.64   | 0.83    |        | 10.17   | 13.36   | 0.98    |        |
| Russian Federation    | (101.07, | (104.93, | (0.10,  | <0.001 | (939.56, | (1018.51 | (0.17,  | <0.001 | (685.76, | (867.11, | (0.06,  | 0.035  | (9.82,  | (12.93, | (0.13,  | 0.023  |
|                       | 103.35)  | 107.48)  | 0.15)   |        | 946.47)  | ,        | 0.44)   |        | 691.65)  | 874.18)  | 1.60)   |        | 10.53)  | 13.80)  | 1.84)   |        |
|                       |          |          |         |        |          | 1026.44) |         |        |          |          |         |        |         |         |         |        |
|                       | 209.40   | 167.22   | -0.78   |        | 3184.98  | 3140.56  | -0.04   |        | 1793.59  | 677.05   | -3.35   |        | 27.43   | 8.24    | -4.10   |        |
| Rwanda                | (201.73, | (162.43, | (-0.82, | <0.001 | (3154.71 | (3119.40 | (-0.08, | 0.096  | (1770.14 | (667.09, | (-3.69, | <0.001 | (24.56, | (7.16,  | (-4.47, | <0.001 |
|                       | 217.32)  | 172.12)  | -0.74)  |        | ,        | ,        | 0.01)   |        | ,        | 687.11)  | -3.01)  |        | 30.55)  | 9.44)   | -3.73)  |        |
|                       |          |          |         |        | 3215.49) | 3161.84) |         |        | 1817.30) |          |         |        |         |         |         |        |
|                       | 138.22   | 113.06   | -0.69   |        | 1257.73  | 1128.43  | -0.36   |        | 1970.01  | 384.95   | -5.47   |        | 33.08   | 5.25    | -6.17   |        |
| Saint Kitts and Nevis | (69.94,  | (60.59,  | (-0.74, | <0.001 | (1027.34 | (944.15, | (-0.47, | <0.001 | (1677.61 | (280.23, | (-5.86, | <0.001 | (6.00,  | (0.02,  | (-6.57, | <0.001 |
|                       | 247.58)  | 194.58)  | -0.64)  |        | ,        | 1339.72) | -0.25)  |        | ,        | 517.56)  | -5.08)  |        | 105.33) | 45.81)  | -5.76)  |        |
|                       |          |          |         |        | 1526.28) |          |         |        | 2300.45) |          |         |        |         |         |         |        |
| Saint Lucia           | 192.46   | 188.67   | -0.07   | <0.001 | 2795.74  | 2752.43  | -0.05   | 0.001  | 1100.38  | 610.22   | -1.98   | <0.001 | 16.45   | 7.95    | -2.45   | <0.001 |

|                                     |          |          |         |        |          |          |         |        |          |           |         |        |         |         |         |        |
|-------------------------------------|----------|----------|---------|--------|----------|----------|---------|--------|----------|-----------|---------|--------|---------|---------|---------|--------|
|                                     | (143.47, | (145.17, | (-0.10, |        | (2597.50 | (2578.64 | (-0.08, |        | (973.83, | (530.46,  | (-2.41, | (4.45, | (1.50,  | (-2.96, |         |        |
|                                     | 254.35)  | 241.55)  | -0.04)  |        | ,        | ,        | -0.02)  |        | 1239.83) | 699.05)   | -1.54)  | 43.91) | 25.20)  | -1.94)  |         |        |
|                                     |          |          |         |        | 3006.31) | 2935.25) |         |        |          |           |         |        |         |         |         |        |
|                                     |          |          |         |        | 2667.57  | 2712.75  |         |        | 1263.70  | 873.46    | -1.23   | 19.25  | 12.50   | -1.45   |         |        |
| Saint Vincent and<br>the Grenadines | 187.04   | 186.77   | -0.00   |        | (2449.80 | (2493.13 | 0.06    |        | (1111.42 | (751.23,  | (-1.98, | 0.001  | (4.86,  | (2.20,  | (-2.29, | 0.001  |
|                                     | (133.16, | (132.60, | (-0.05, | 0.870  | ,        | ,        | (0.00,  | 0.045  | ,        | (1010.11) | -0.48)  |        | (53.85) | 39.54)  | -0.60)  |        |
|                                     | 257.80)  | 255.86)  | 0.04)   |        | 2901.32) | 2946.69) | 0.12)   |        | 1432.59) |           |         |        |         |         |         |        |
|                                     |          |          |         |        | 1893.47  | 1927.73  |         |        | 1675.46  | 1898.73   | 0.44    | 25.81  | 29.66   | 0.49    |         |        |
| Samoa                               | 150.82   | 155.21   | 0.10    |        | (1734.30 | (1790.18 | 0.09    |        | (1520.77 | (1759.05  | 0.44    | 25.81  | 29.66   | 0.49    |         |        |
|                                     | (108.12, | (117.79, | (0.09,  | <0.001 | ,        | ,        | (-0.03, | 0.133  | ,        | ,         | (0.40,  | <0.001 | (9.91,  | (14.53, | (0.44,  | <0.001 |
|                                     | 206.07)  | 201.32)  | 0.12)   |        | 2064.42) | 2073.58) | 0.20)   |        | 1842.45) | 2046.94)  | 0.48)   |        | 55.92)  | 54.29)  | 0.53)   |        |
|                                     |          |          |         |        | 1517.26  | 1488.07  |         |        | 270.11   | 246.54    | -0.31   | 2.79   | 2.45    | -0.43   |         |        |
| San Marino                          | 58.27    | 58.26    | 0.01    |        | (1176.07 | (1181.46 | -0.07   |        | (138.55, | (133.20,  | (-0.43, | <0.001 | (0.00,  | (0.00,  | (-0.56, | <0.001 |
|                                     | (9.99,   | (12.81,  | (-0.03, | 0.704  | ,        | ,        | (-0.09, | <0.001 | 478.15)  | 422.41)   | -0.19)  |        | 98.74)  | 83.42)  | -0.30)  |        |
|                                     | 190.19)  | 172.40)  | 0.04)   |        | 1929.94) | 1853.67) | -0.04)  |        |          |           |         |        |         |         |         |        |
|                                     |          |          |         |        | 3546.53  | 3888.97  |         |        | 1108.23  | 1104.05   | 0.17    | 15.08  | 14.61   | 0.11    |         |        |
| Sao Tome and<br>Principe            | 168.04   | 164.31   | -0.08   |        | (3291.10 | (3703.33 | 0.32    |        | (960.43, | (1004.19  | (-0.59, | 0.654  | (2.66,  | (5.25,  | (-0.77, | 0.806  |
|                                     | (115.49, | (127.81, | (-0.09, | <0.001 | ,        | ,        | (0.30,  | <0.001 | 1273.91) | ,         | 0.94)   |        | 49.74)  | 32.60)  | 1.00)   |        |
|                                     | 238.76)  | 208.42)  | -0.06)  |        | 3818.58) | 4081.89) | 0.35)   |        |          | 1211.44)  | 0.94)   |        |         |         |         |        |
|                                     |          |          |         |        | 1385.72  | 1487.30  |         |        | 1376.36  | 1019.93   | -0.98   | 21.37  | 15.19   | -1.21   |         |        |
| Saudi Arabia                        | 80.11    | 96.79    | 0.65    |        | (1371.18 | (1478.76 | 0.36    |        | (1361.65 | (1012.99  | (-1.25, | <0.001 | (19.55, | (14.36, | (-1.39, | <0.001 |
|                                     | (76.58,  | (94.66,  | (0.62,  | <0.001 | ,        | ,        | (0.07,  | 0.013  | ,        | ,         | (-1.25, | <0.001 | (19.55, | (14.36, | (-1.39, | <0.001 |
|                                     | 83.76)   | 98.97)   | 0.69)   |        | 1400.40) | 1495.89) | 0.64)   |        | 1391.21) | 1026.92)  | -0.71)  |        | 23.32)  | 16.06)  | -1.03)  |        |
|                                     |          |          |         |        | 2554.53  | 2617.69  |         |        | 903.34   | 682.32    | -0.95   | 12.55  | 8.72    | -1.20   |         |        |
| Senegal                             | 146.05   | 143.96   | -0.05   |        | (2527.66 | (2599.30 | 0.11    |        | (886.87, | (672.73,  | (-1.62, | 0.006  | (10.65, | (7.65,  | (-1.38, | <0.001 |
|                                     | (139.69, | (139.68, | (-0.07, | <0.001 | ,        | ,        | (0.00,  | 0.044  | 920.06)  | 692.01)   | -0.28)  |        | 14.72)  | 9.90)   | -1.01)  |        |
|                                     | 152.66)  | 148.34)  | -0.04)  |        | 2581.64) | 2636.20) | 0.21)   |        |          |           |         |        |         |         |         |        |
|                                     |          |          |         |        | 1128.46  | 1192.15  |         |        | 790.35   | 372.31    | -2.52   | 11.67  | 4.33    | -3.34   |         |        |
| Serbia                              | 95.80    | 94.42    | -0.05   |        | (1112.73 | (1174.33 | 0.25    |        | (777.27, | (362.48,  | (-2.83, | <0.001 | (10.14, | (3.34,  | (-3.73, | <0.001 |
|                                     | (91.27,  | (89.47,  | (-0.07, | <0.001 | ,        | ,        | (0.01,  | 0.040  | 803.61)  | 382.36)   | -2.21)  |        | 13.38)  | 5.55)   | -2.94)  |        |
|                                     | 100.51)  | 99.60)   | -0.03)  |        | 1144.36) | 1210.18) | 0.49)   |        |          |           |         |        |         |         |         |        |
|                                     |          |          |         |        | 1835.14  | 1800.12  |         |        | 1224.69  | 694.57    | -1.93   | 18.29  | 9.12    | -2.36   |         |        |
| Seychelles                          | 111.48   | 108.82   | -0.08   |        | (1619.89 | (1606.52 | -0.06   |        | (1045.47 | (577.43,  | (-2.38, | <0.001 | (2.90,  | (0.78,  | (-2.97, | <0.001 |
|                                     | (63.67,  | (65.43,  | (-0.10, | <0.001 |          |          | (-0.09, | 0.003  |          |           |         |        |         |         |         |        |

|                 |          |          |         |        |           |           |         |        |           |           |         |        |         |         |         |        |
|-----------------|----------|----------|---------|--------|-----------|-----------|---------|--------|-----------|-----------|---------|--------|---------|---------|---------|--------|
|                 | 185.44)  | 171.18)  | -0.05)  |        | ,         | ,         | -0.02)  |        | ,         | 829.49)   | -1.48)  |        | 64.65)  | 39.31)  | -1.74)  |        |
|                 |          |          |         |        | 2074.06)  | 2011.45)  |         |        | 1428.46)  |           |         |        |         |         |         |        |
|                 |          |          |         |        | 2737.02)  | 2929.30)  |         |        | 1031.89)  | 1122.26)  |         |        |         |         |         |        |
|                 | 156.44)  | 167.49)  | 0.24)   |        | (2698.49) | (2903.74) | 0.24)   |        | (1007.73) | (1105.96) | 0.33)   |        | 14.61)  | 15.98)  | 0.33)   |        |
| Sierra Leone    | (147.32, | (161.40, | (0.22,  | <0.001 |           |           | (0.22,  | <0.001 |           |           | (0.13,  | 0.001  | (11.83, | (14.06, | (0.18,  | <0.001 |
|                 | 166.02)  | 173.77)  | 0.26)   |        | ,         | ,         | 0.26)   |        | ,         | ,         | 0.52)   |        | 17.87)  | 18.10)  | 0.48)   |        |
|                 |          |          |         |        | 2775.99)  | 2955.04)  |         |        | 1056.51)  | 1138.75)  |         |        |         |         |         |        |
|                 | 86.91)   | 82.89)   | -0.17)  |        | 852.52)   | 801.92)   | -0.19)  |        | 441.37)   | 160.37)   | -3.46)  |        | 6.27)   | 1.56)   | -4.81)  |        |
| Singapore       | (80.40,  | (77.53,  | (-0.20, | <0.001 | (831.89,  | (785.61,  | (-0.26, | <0.001 | (426.48,  | (152.71,  | (-4.11, | <0.001 | (4.61,  | (0.90,  | (-5.75, | <0.001 |
|                 | 93.86)   | 88.62)   | -0.13)  |        | 873.57)   | 818.60)   | -0.11)  |        | 456.69)   | 168.41)   | -2.79)  |        | 8.39)   | 2.67)   | -3.87)  |        |
|                 |          |          |         |        | 1434.89)  | 1365.53)  | -0.16)  |        | 618.69)   | 335.27)   | -2.01)  |        | 8.38)   | 3.55)   | -2.80)  |        |
| Slovakia        | (74.74,  | (68.00,  | (-0.34, | <0.001 | (1411.76) | (1341.12) | (-0.20, | <0.001 | (603.77,  | (323.48,  | (-2.38, | <0.001 | (6.74,  | (2.46,  | (-3.37, | <0.001 |
|                 | 85.74)   | 79.24)   | -0.27)  |        | ,         | ,         | -0.11)  |        | 633.91)   | 347.44)   | -1.64)  |        | 10.33)  | 5.05)   | -2.24)  |        |
|                 |          |          |         |        | 1183.48)  | 1122.01)  | -0.16)  |        | 398.73)   | 173.38)   | -2.83)  |        | 5.05)   | 1.25)   | -4.95)  |        |
| Slovenia        | (66.63,  | (64.96,  | (-0.06, | 0.035  | (1149.31) | (1083.76) | (-0.24, | <0.001 | (379.26,  | (158.60,  | (-3.26, | <0.001 | (3.10,  | (0.33,  | (-5.71, | <0.001 |
|                 | 84.11)   | 84.89)   | -0.00)  |        | ,         | ,         | -0.08)  |        | 419.00)   | 189.33)   | -2.40)  |        | 7.87)   | 3.64)   | -4.19)  |        |
|                 |          |          |         |        | 1218.45)  | 1161.42)  |         |        |           |           |         |        |         |         |         |        |
|                 | 202.99)  | 189.63)  | -0.23)  |        | 1771.53)  | 1726.72)  | -0.07)  |        | 4771.58)  | 4659.32)  | -0.08)  |        | 80.61)  | 78.69)  | -0.09)  |        |
| Solomon Islands | (166.21, | (166.20, | (-0.25, | <0.001 | (1661.14) | (1654.94) | (-0.14, | 0.034  | (4581.73) | (4539.07) | (-0.20, | 0.186  | (57.42, | (63.70, | (-0.21, | 0.172  |
|                 | 246.08)  | 215.50)  | -0.22)  |        | ,         | ,         | -0.01)  |        | ,         | ,         | 0.04)   |        | 110.51) | 96.20)  | 0.04)   |        |
|                 |          |          |         |        | 1887.92)  | 1800.88)  |         |        | 4967.69)  | 4782.00)  |         |        |         |         |         |        |
|                 | 207.97)  | 204.96)  | -0.05)  |        | 3159.11)  | 3299.67)  | 0.16)   |        | 1457.01)  | 1075.83)  | -1.01)  |        | 21.81)  | 15.04)  | -1.26)  |        |
| Somalia         | (199.99, | (200.34, | (-0.08, | 0.002  | (3127.43) | (3280.77) | (0.10,  | <0.001 | (1435.31) | (1064.65) | (-1.13, | <0.001 | (19.22, | (13.73, | (-1.42, | <0.001 |
|                 | 216.20)  | 209.66)  | -0.02)  |        | ,         | ,         | 0.22)   |        | ,         | ,         | -0.90)  |        | 24.66)  | 16.46)  | -1.09)  |        |
|                 |          |          |         |        | 3191.04)  | 3318.66)  |         |        | 1478.96)  | 1087.11)  |         |        |         |         |         |        |
|                 | 188.58)  | 169.08)  | -0.37)  |        | 2911.83)  | 2825.24)  | -0.09)  |        | 1599.48)  | 617.65)   | -3.10)  |        | 24.41)  | 7.51)   | -3.88)  |        |
| South Africa    | (185.58, | (166.72, | (-0.40, | <0.001 | (2899.94) | (2815.65) | (-0.17, | 0.016  | (1590.38) | (613.24,  | (-4.74, | <0.001 | (23.29, | (7.04,  | (-5.82, | <0.001 |
|                 | 191.62)  | 171.46)  | -0.35)  |        | ,         | ,         | -0.02)  |        | ,         | ,         | -1.43)  |        | 25.58)  | 8.01)   | -1.89)  |        |
|                 |          |          |         |        | 2923.75)  | 2834.86)  |         |        | 1608.62)  |           |         |        |         |         |         |        |
|                 | 154.98)  | 155.64)  | 0.02)   |        | 3055.80)  | 3212.05)  | 0.19)   |        | 915.50)   | 665.57)   | -1.10)  |        | 12.37)  | 7.88)   | -1.55)  |        |
| South Sudan     | (147.45, | (149.83, | (-0.00, | 0.081  | (3021.69) | (3184.94) | (0.12,  | <0.001 | (896.05,  | (653.07,  | (-1.44, | <0.001 | (10.16, | (6.56,  | (-1.97, | <0.001 |
|                 | 162.83)  | 161.64)  | 0.03)   |        | ,         | ,         | 0.26)   |        | 935.30)   | 678.26)   | -0.77)  |        | 14.97)  | 9.41)   | -1.14)  |        |
|                 |          |          |         |        | 3090.25)  | 3239.34)  |         |        |           |           |         |        |         |         |         |        |

|                            |          |          |         |        |           |           |         |        |           |           |         |         |         |         |         |        |
|----------------------------|----------|----------|---------|--------|-----------|-----------|---------|--------|-----------|-----------|---------|---------|---------|---------|---------|--------|
|                            | 61.90    | 58.37    | -0.21   |        | 797.46    | 796.03    | 0.02    |        | 415.44    | 180.42    | -2.87   |         | 5.87    | 1.96    | -3.78   |        |
| Spain                      | (60.10,  | (56.53,  | (-0.27, | <0.001 | (790.97,  | (789.23,  | (-0.13, | 0.776  | (410.76,  | (177.20,  | (-3.11, | <0.001  | (5.33,  | (1.65,  | (-4.08, | <0.001 |
|                            | 63.74)   | 60.26)   | -0.14)  |        | 803.99)   | 802.88)   | 0.17)   |        | 420.17)   | 183.69)   | -2.64)  |         | 6.46)   | 2.33)   | -3.48)  |        |
|                            | 64.57    | 63.84    | -0.03   |        | 760.77    | 759.99    | 0.03    |        | 952.45    | 494.98    | -2.09   |         | 14.35   | 6.61    | -2.48   |        |
| Sri Lanka                  | (61.96,  | (61.45,  | (-0.06, | 0.099  | (751.77,  | (751.67,  | (-0.15, | 0.766  | (942.41,  | (488.26,  | (-3.15, | <0.001  | (13.14, | (5.85,  | (-3.72, | <0.001 |
|                            | 67.25)   | 66.31)   | 0.01)   |        | 769.84)   | 768.38)   | 0.21)   |        | 962.57)   | 501.77)   | -1.03)  |         | 15.65)  | 7.43)   | -1.23)  |        |
|                            | 156.56   | 155.53   | -0.03   |        | 1863.00   | 1959.76   | 0.19    |        | 2360.47   | 1342.12   | -1.91   |         | 38.18   | 20.50   | -2.10   |        |
| Sudan                      | (152.49, | (152.87, | (-0.03, | <0.001 | (1848.91, | (1950.30, | (0.09,  | <0.001 | (2344.34, | (1334.22, | (-2.00, | <0.001  | (36.13, | (19.53, | (-2.19, | <0.001 |
|                            | 160.71)  | 158.22)  | -0.02)  |        | ,         | ,         | 0.28)   | ,      | ,         | -1.81)    |         | (40.32, | (21.51, | -2.01)  |         |        |
|                            | 186.57   | 191.13   | 0.09    |        | 2291.43   | 2353.58   | 0.12    |        | 1190.62   | 903.68    | -0.71   |         | 18.38   | 13.38   | -0.86   |        |
| Suriname                   | (156.72, | (166.00, | (0.06,  | <0.001 | (2182.81, | (2263.24, | (0.04,  | 0.004  | (1110.94, | (848.15,  | (-2.66, | 0.483   | (9.64,  | (7.43,  | (-3.20, | 0.479  |
|                            | 220.89)  | 219.04)  | 0.13)   |        | ,         | ,         | 0.20)   | ,      | ,         | 1.28)     |         | (32.19, | (22.27, | 1.54)   |         |        |
|                            | 69.01    | 76.31    | 0.35    |        | 1231.50   | 1108.78   | -0.30   |        | 336.46    | 190.90    | -1.88   |         | 4.00    | 1.45    | -3.44   |        |
| Sweden                     | (64.83,  | (72.07,  | (0.30,  | <0.001 | (1213.51, | (1092.46, | (-0.48, | 0.001  | (327.16,  | (184.15,  | (-2.68, | <0.001  | (3.05,  | (0.93,  | (-4.65, | <0.001 |
|                            | 73.41)   | 80.74)   | 0.41)   |        | ,         | ,         | -0.13)  | ,      | 345.98)   | 197.85)   | -1.08)  |         | 5.17)   | 2.19)   | -2.22)  |        |
|                            | 54.12    | 52.32    | -0.11   |        | 790.02    | 748.53    | -0.15   |        | 282.01    | 128.17    | -2.66   |         | 3.71    | 1.17    | -3.92   |        |
| Switzerland                | (50.23,  | (48.61,  | (-0.19, | 0.012  | (774.99,  | (734.42,  | (-0.35, | 0.121  | (273.01,  | (122.35,  | (-3.09, | <0.001  | (2.74,  | (0.69,  | (-4.44, | <0.001 |
|                            | 58.27)   | 56.27)   | -0.02)  |        | 805.31)   | 762.88)   | 0.04)   |        | 291.27)   | 134.23)   | -2.23)  |         | 4.94)   | 1.93)   | -3.39)  |        |
|                            | 147.55   | 133.50   | -0.35   |        | 2071.96   | 2079.47   | 0.03    |        | 3128.23   | 1558.76   | -2.32   |         | 50.32   | 23.75   | -2.50   |        |
| Syrian Arab Republic       | (142.35, | (129.14, | (-0.39, | <0.001 | (2052.24, | (2062.07, | (-0.03, | 0.380  | (3103.88, | (1543.65, | (-2.64, | <0.001  | (47.24, | (21.91, | (-2.86, | <0.001 |
|                            | 152.90)  | 137.99)  | -0.31)  |        | ,         | ,         | 0.08)   | ,      | ,         | -2.00)    |         | (53.57, | (25.72, | -2.13)  |         |        |
|                            | 62.72    | 70.05    | 0.39    |        | 919.70    | 1000.76   | 0.30    |        | 497.05    | 280.01    | -1.92   |         | 6.53    | 2.80    | -2.83   |        |
| Taiwan (Province of China) | (60.45,  | (67.50,  | (0.36,  | <0.001 | (910.93,  | (991.10,  | (0.25,  | <0.001 | (490.60,  | (274.91,  | (-2.19, | <0.001  | (5.81,  | (2.33,  | (-3.54, | <0.001 |
|                            | 65.06)   | 72.69)   | 0.41)   |        | 928.54)   | 1010.51)  | 0.35)   |        | 503.57)   | 285.19)   | -1.65)  |         | 7.32)   | 3.37)   | -2.11)  |        |
|                            | 145.74   | 144.37   | -0.03   |        | 1743.83   | 1753.87   | 0.03    |        | 1341.03   | 850.76    | -1.50   |         | 21.25   | 12.78   | -1.66   |        |
| Tajikistan                 | (138.34, | (139.11, | (-0.05, | 0.006  | (1717.68, | (1735.38, | (-0.00, | 0.069  | (1317.27, | (837.73,  | (-1.75, | <0.001  | (18.32, | (11.22, | (-1.94, | <0.001 |
|                            | 153.48)  | 149.79)  | -0.01)  |        | ,         | ,         | 0.06)   | ,      | ,         | -1.25)    |         | (24.55, | (14.51, | -1.38)  |         |        |
|                            | 105.81   | 102.79   | -0.11   | <0.001 | 1569.85   | 1549.62   | -0.04   | 0.150  | 666.12    | 467.19    | -1.27   | 0.018   | 9.11    | 5.61    | -1.68   | 0.013  |

|                        |                     |                     |                   |        |                       |                       |                   |        |                       |                      |                   |        |                    |                    |                   |        |
|------------------------|---------------------|---------------------|-------------------|--------|-----------------------|-----------------------|-------------------|--------|-----------------------|----------------------|-------------------|--------|--------------------|--------------------|-------------------|--------|
|                        | (104.03,<br>107.61) | (101.00,<br>104.61) | (-0.12,<br>-0.09) |        | (1562.99,<br>1576.74) | (1542.67,<br>1556.59) | (-0.09,<br>0.01)  |        | (661.60,<br>670.67)   | (463.42,<br>470.99)  | (-2.31,<br>-0.22) |        | (8.59,<br>9.66)    | (5.21,<br>6.04)    | (-2.99,<br>-0.35) |        |
|                        |                     |                     |                   |        | 1550.98               | 1550.91               | 0.02              |        | 879.84                | 926.19               | 0.32              |        | 12.59              | 13.39              | 0.37              |        |
| Timor-Leste            | (114.66,<br>152.56) | (109.96,<br>138.51) | (-0.26,<br>-0.23) | <0.001 | (1488.10,<br>1615.98) | (1501.22,<br>1601.97) | (-0.11,<br>0.14)  | 0.808  | (831.83,<br>930.03)   | (886.76,<br>967.06)  | (-0.28,<br>0.93)  | 0.301  | (7.42,<br>20.16)   | (8.96,<br>19.38)   | (-0.35,<br>1.10)  | 0.310  |
|                        |                     |                     |                   |        | 2671.88               | 2783.43               | 0.15              |        | 1140.54               | 881.86               | -0.89             |        | 16.52              | 12.06              | -1.03             |        |
| Togo                   | (142.40,<br>161.07) | (145.35,<br>157.30) | (-0.02,<br>0.01)  | 0.395  | (2633.31,<br>2710.91) | (2757.99,<br>2809.05) | (0.10,<br>0.20)   | <0.001 | (1114.59,<br>1166.99) | (867.42,<br>896.49)  | (-1.09,<br>-0.70) | <0.001 | (13.49,<br>20.07)  | (10.41,<br>13.89)  | (-1.29,<br>-0.77) | <0.001 |
|                        |                     |                     |                   |        | 1042.81               | 1049.75               | 0.03              |        | 2325.44               | 2050.04              | -0.43             |        | 38.09              | 33.23              | -0.47             |        |
| Tokelau                | (0.00,<br>1911.84)  | (0.00,<br>2501.25)  | (-0.17,<br>-0.16) | <0.001 | (201.30,<br>3355.81)  | (142.16,<br>3987.06)  | (-0.01,<br>0.07)  | 0.118  | (868.73,<br>5174.62)  | (586.51,<br>5425.14) | (-0.45,<br>-0.41) | <0.001 | (0.00,<br>1772.65) | (0.00,<br>2366.33) | (-0.49,<br>-0.45) | <0.001 |
|                        |                     |                     |                   |        | 2389.24               | 2401.68               | 0.04              |        | 892.35                | 780.94               | -0.46             |        | 11.97              | 9.97               | -0.59             |        |
| Tonga                  | (91.67,<br>217.65)  | (90.96,<br>203.48)  | (-0.26,<br>0.05)  | 0.188  | (2159.40,<br>2638.78) | (2186.84,<br>2632.46) | (-0.08,<br>0.16)  | 0.532  | (748.39,<br>1057.31)  | (658.78,<br>919.57)  | (-0.58,<br>-0.34) | <0.001 | (1.16,<br>48.98)   | (1.03,<br>38.66)   | (-0.80,<br>-0.39) | <0.001 |
|                        |                     |                     |                   |        | 2689.39               | 2694.11               | 0.02              |        | 1020.54               | 667.28               | -1.57             |        | 15.07              | 8.94               | -1.93             |        |
| Trinidad and<br>Tobago | (183.45,<br>219.32) | (175.36,<br>210.15) | (-0.16,<br>-0.14) | <0.001 | (2624.87,<br>2755.16) | (2630.87,<br>2758.59) | (-0.04,<br>0.07)  | 0.571  | (980.63,<br>1061.69)  | (636.42,<br>699.38)  | (-2.00,<br>-1.14) | <0.001 | (10.55,<br>20.91)  | (5.74,<br>13.47)   | (-2.43,<br>-1.42) | <0.001 |
|                        |                     |                     |                   |        | 1008.48               | 1133.47               | 0.38              |        | 904.68                | 581.34               | -1.51             |        | 14.21              | 8.37               | -1.79             |        |
| Tunisia                | (71.89,<br>80.72)   | (74.83,<br>82.00)   | (0.07,<br>0.13)   | <0.001 | (992.81,<br>1024.35)  | (1119.82,<br>1147.26) | (0.28,<br>0.48)   | <0.001 | (889.65,<br>919.91)   | (571.70,<br>591.13)  | (-1.74,<br>-1.28) | <0.001 | (12.37,<br>16.27)  | (7.26,<br>9.62)    | (-2.05,<br>-1.54) | <0.001 |
|                        |                     |                     |                   |        | 1426.87               | 1250.32               | -0.44             |        | 750.63                | 367.10               | -2.40             |        | 10.72              | 4.33               | -3.03             |        |
| Turkey                 | (85.02,<br>88.50)   | (68.37,<br>70.89)   | (-0.80,<br>-0.70) | <0.001 | (1419.88,<br>1433.88) | (1244.98,<br>1255.67) | (-0.52,<br>-0.37) | <0.001 | (745.54,<br>755.75)   | (364.21,<br>370.00)  | (-2.94,<br>-1.85) | <0.001 | (10.11,<br>11.35)  | (4.02,<br>4.65)    | (-3.72,<br>-2.33) | <0.001 |
|                        |                     |                     |                   |        | 1857.12               | 1925.68               | 0.14              |        | 1676.98               | 1594.05              | -0.12             |        | 26.40              | 24.48              | -0.20             |        |
| Turkmenistan           | (135.85,<br>)       | (143.11,<br>)       | (0.12,<br>)       | <0.001 | (1826.11,<br>)        | (1897.89,<br>)        | (0.06,<br>)       | 0.001  | (1647.06,<br>)        | (1568.81,<br>)       | (-0.99,<br>)      | 0.780  | (22.74,<br>)       | (21.45,<br>)       | (-1.13,<br>)      | 0.675  |



|                              |          |          |         |        |           |           |         |        |           |           |         |         |         |         |         |        |
|------------------------------|----------|----------|---------|--------|-----------|-----------|---------|--------|-----------|-----------|---------|---------|---------|---------|---------|--------|
|                              | 153.27)  | 158.86)  | 0.20)   |        | ,         | ,         | 0.23)   |        | ,         | ,         | 0.75)   | 30.53)  | 27.84)  | 0.74)   |         |        |
|                              |          |          |         |        | 1888.56)  | 1953.79)  |         |        | 1707.33)  | 1619.60)  |         |         |         |         |         |        |
|                              |          |          |         |        |           |           |         |        | 2941.63)  | 2265.74)  |         |         |         |         |         |        |
|                              | 139.79)  | 114.42)  | -0.69)  |        | 1062.27)  | 985.86)   | -0.24)  |        | (2225.23) | (1665.30) | -0.87)  | 48.56)  | 37.04)  | -0.90)  |         |        |
| Tuvalu                       | (25.39,  | (17.96,  | (-0.72, | <0.001 | (651.86,  | (607.35,  | (-0.34, | <0.001 | (2225.23) | (1665.30) | (-0.95, | <0.001  | (0.98,  | (0.35,  | (-0.99, | <0.001 |
|                              | 438.79)  | 387.38)  | -0.66)  |        | 1639.19)  | 1520.47)  | -0.13)  |        | ,         | ,         | -0.79)  | 292.94) | 263.69) | -0.82)  |         |        |
|                              |          |          |         |        |           |           |         |        | 3819.34)  | 3018.68)  |         |         |         |         |         |        |
|                              |          |          |         |        | 3262.84)  | 3519.28)  |         |        | 702.46)   | 671.03)   | -0.19)  | 8.59)   | 7.78)   | -0.44)  |         |        |
| Uganda                       | (180.40, | (173.26, | (-0.18, | <0.001 | (3242.56) | (3506.20) | (0.12,  | 0.001  | (692.59,  | (665.10,  | (-0.46, | 0.169   | (7.50,  | (7.14,  | (-0.83, | 0.032  |
|                              | 189.95)  | 179.01)  | -0.17)  |        | ,         | ,         | 0.47)   |        | 712.45)   | 677.00)   | 0.08)   | 9.81)   | 8.47)   | -0.04)  |         |        |
|                              |          |          |         |        |           |           |         |        |           |           |         |         |         |         |         |        |
|                              | 96.79)   | 104.65)  | 0.28)   |        | 972.55)   | 1088.54)  | 0.40)   |        | 571.27)   | 903.34)   | 1.63)   | 7.93)   | 13.49)  | 1.88)   |         |        |
| Ukraine                      | (94.87,  | (102.35, | (0.24,  | <0.001 | (966.43,  | (1081.09) | (0.24,  | <0.001 | (566.61,  | (896.73,  | (-0.47, | 0.129   | (7.39,  | (12.71, | (-0.59, | 0.137  |
|                              | 98.75)   | 106.99)  | 0.32)   |        | 978.69)   | ,         | 0.56)   |        | 575.97)   | 910.00)   | 3.77)   | 8.50)   | 14.31)  | 4.41)   |         |        |
|                              |          |          |         |        |           | 1096.05)  |         |        |           |           |         |         |         |         |         |        |
|                              |          |          |         |        | 1743.08)  | 1751.17)  |         |        | 1017.79)  | 713.85)   | -1.22)  | 14.77)  | 9.65)   | -1.49)  |         |        |
| United Arab Emirates         | (124.42, | (134.12, | (0.06,  | <0.001 | (1695.78) | (1726.18) | (-0.07, | 0.514  | (981.52,  | (698.37,  | (-1.56, | <0.001  | (10.69, | (7.99,  | (-1.90, | <0.001 |
|                              | 151.66)  | 148.55)  | 0.11)   |        | ,         | ,         | 0.15)   |        | 1055.13)  | 729.65)   | -0.88)  | 19.98)  | 11.65)  | -1.07)  |         |        |
|                              |          |          |         |        | 1791.43)  | 1776.50)  |         |        |           |           |         |         |         |         |         |        |
|                              |          |          |         |        | 1100.05)  | 1125.43)  |         |        | 377.22)   | 261.20)   | -1.21)  | 5.12)   | 3.17)   | -1.62)  |         |        |
| United Kingdom               | (71.16,  | (68.81,  | (-0.17, | <0.001 | (1093.75) | (1119.21) | (0.01,  | 0.037  | (373.53,  | (258.24,  | (-1.35, | <0.001  | (4.70,  | (2.86,  | (-2.10, | <0.001 |
|                              | 74.41)   | 71.91)   | -0.06)  |        | ,         | ,         | 0.18)   |        | 380.94)   | 264.19)   | -1.07)  | 5.57)   | 3.52)   | -1.14)  |         |        |
|                              |          |          |         |        | 1106.39)  | 1131.67)  |         |        |           |           |         |         |         |         |         |        |
|                              |          |          |         |        | 3076.23)  | 3338.71)  |         |        | 903.59)   | 712.85)   | -0.75)  | 12.18)  | 8.62)   | -1.13)  |         |        |
| United Republic of Tanzania  | (166.58, | (172.24, | (0.08,  | <0.001 | (3060.54) | (3328.02) | (0.22,  | <0.001 | (894.75,  | (707.78,  | (-0.87, | <0.001  | (11.15, | (8.06,  | (-1.29, | <0.001 |
|                              | 173.88)  | 177.08)  | 0.10)   |        | ,         | ,         | 0.37)   |        | 912.50)   | 717.96)   | -0.63)  | 13.28)  | 9.21)   | -0.96)  |         |        |
|                              |          |          |         |        | 2025.46)  | 1959.78)  |         |        | 507.97)   | 460.58)   | -0.34)  | 6.62)   | 5.81)   | -0.43)  |         |        |
| United States of America     | (144.63, | (148.18, | (0.03,  | 0.001  | (2021.64) | (1956.13) | (-0.29, | 0.338  | (506.05,  | (458.82,  | (-0.65, | 0.035   | (6.40,  | (5.61,  | (-0.74, | 0.008  |
|                              | 146.68)  | 150.20)  | 0.13)   |        | ,         | ,         | 0.10)   |        | 509.89)   | 462.35)   | -0.02)  | 6.84)   | 6.01)   | -0.11)  |         |        |
|                              |          |          |         |        | 2029.30)  | 1963.43)  |         |        |           |           |         |         |         |         |         |        |
| United States Virgin Islands | (66.07,  | (67.15,  | (0.21,  | <0.001 | (983.60,  | (991.94,  | (0.06,  | <0.001 | (572.14,  | (283.63,  | (-2.30, | <0.001  | (1.51,  | (0.08,  | (-2.72, | <0.001 |
|                              | 160.40)  | 178.65)  | 0.27)   |        | 1276.00)  | 1328.70)  | 0.13)   |        | 800.10)   | 477.08)   | -1.78)  | 37.13)  | 35.05)  | -2.07)  |         |        |

|                                          |          |          |         |        |          |          |         |        |          |          |         |        |         |         |         |        |
|------------------------------------------|----------|----------|---------|--------|----------|----------|---------|--------|----------|----------|---------|--------|---------|---------|---------|--------|
|                                          | 64.36    | 60.71    | -0.18   |        | 844.00   | 873.75   | 0.15    |        | 717.78   | 354.00   | -2.39   |        | 10.97   | 4.69    | -2.87   |        |
| Uruguay                                  | (57.95,  | (54.74,  | (-0.22, | <0.001 | (820.34, | (850.57, | (-0.02, | 0.086  | (695.97, | (339.39, | (-2.74, | <0.001 | (8.42,  | (3.15,  | (-3.32, | <0.001 |
|                                          | 71.29)   | 67.19)   | -0.14)  |        | 868.17)  | 897.43)  | 0.31)   |        | 740.10)  | 369.10)  | -2.04)  |        | 14.05)  | 6.74)   | -2.40)  |        |
|                                          | 147.16   | 144.42   | -0.05   |        | 1771.48  | 1872.72  | 0.22    |        | 1242.67  | 1229.82  | -0.04   |        | 18.99   | 18.74   | -0.06   |        |
| Uzbekistan                               | (143.49, | (141.62, | (-0.11, | 0.098  | (1758.58 | (1862.65 | (0.11,  | <0.001 | (1231.72 | (1221.69 | (-0.44, | 0.834  | (17.65, | (17.75, | (-0.50, | 0.785  |
|                                          | 150.91)  | 147.25)  | 0.01)   |        | ,        | ,        | 0.32)   |        | ,        | ,        | 0.35)   |        | 20.41)  | 19.78)  | 0.38)   |        |
|                                          | 198.97   | 179.85   | -0.35   |        | 2102.15  | 2011.29  | -0.14   |        | 2078.31  | 2645.97  | 0.81    |        | 32.00   | 42.16   | 0.92    |        |
| Vanuatu                                  | (149.71, | (146.82, | (-0.36, | <0.001 | (1934.75 | (1897.15 | (-0.21, | <0.001 | (1909.45 | (2513.32 | (0.56,  | <0.001 | (14.21, | (26.86, | (0.65,  | <0.001 |
|                                          | 260.12)  | 218.43)  | -0.34)  |        | ,        | ,        | -0.08)  |        | ,        | ,        | 1.05)   |        | 62.85)  | 63.35)  | 1.19)   |        |
|                                          | 79.09    | 70.17    | -0.41   |        | 943.73   | 903.79   | -0.10   |        | 909.54   | 659.91   | -1.27   |        | 14.58   | 10.09   | -1.47   |        |
| Venezuela<br>(Bolivarian<br>Republic of) | (76.30,  | (67.99,  | (-0.43, | <0.001 | (934.06, | (895.92, | (-0.33, | 0.370  | (899.96, | (653.19, | (-2.38, | 0.026  | (13.38, | (9.28,  | (-2.74, | 0.025  |
|                                          | 81.96)   | 72.40)   | -0.39)  |        | 953.48)  | 911.70)  | 0.12)   |        | 919.20)  | 666.68)  | -0.15)  |        | 15.86)  | 10.96)  | -0.19)  |        |
|                                          | 64.09    | 63.68    | 0.03    |        | 739.76   | 784.16   | 0.23    |        | 665.40   | 421.69   | -1.54   |        | 9.96    | 5.45    | -2.03   |        |
| Viet Nam                                 | (62.74,  | (62.59,  | (-0.06, | 0.542  | (735.20, | (780.30, | (-0.01, | 0.059  | (661.00, | (418.89, | (-1.68, | <0.001 | (9.42,  | (5.14,  | (-2.12, | <0.001 |
|                                          | 65.45)   | 64.79)   | 0.12)   |        | 744.35)  | 788.05)  | 0.47)   |        | 669.83)  | 424.52)  | -1.41)  |        | 10.53)  | 5.78)   | -1.95)  |        |
|                                          | 160.50   | 156.79   | -0.08   |        | 1901.49  | 1976.78  | 0.17    |        | 1620.81  | 1249.72  | -0.85   |        | 26.13   | 19.35   | -1.02   |        |
| Yemen                                    | (155.26, | (153.72, | (-0.11, | <0.001 | (1883.32 | (1965.81 | (-0.06, | 0.150  | (1603.61 | (1240.90 | (-1.09, | <0.001 | (23.97, | (18.26, | (-1.35, | <0.001 |
|                                          | 165.88)  | 159.92)  | -0.06)  |        | ,        | ,        | 0.40)   |        | ,        | ,        | -0.61)  |        | 28.43)  | 20.49)  | -0.68)  |        |
|                                          | 190.55   | 177.91   | -0.24   |        | 3146.96  | 3178.55  | 0.03    |        | 1341.48  | 886.28   | -1.44   |        | 19.69   | 11.85   | -1.75   |        |
| Zambia                                   | (183.48, | (173.72, | (-0.27, | <0.001 | (3117.72 | (3160.49 | (-0.00, | 0.068  | (1321.19 | (876.39, | (-1.66, | <0.001 | (17.25, | (10.71, | (-1.99, | <0.001 |
|                                          | 197.87)  | 182.18)  | -0.21)  |        | ,        | ,        | 0.07)   |        | ,        | 896.26)  | -1.21)  |        | 22.41)  | 13.09)  | -1.51)  |        |
|                                          | 157.66   | 174.75   | 0.36    |        | 2787.87  | 2880.10  | 0.12    |        | 720.32   | 919.11   | 0.82    |        | 9.12    | 12.41   | 1.05    |        |
| Zimbabwe                                 | (152.17, | (170.22, | (0.30,  | <0.001 | (2764.45 | (2861.56 | (0.05,  | 0.001  | (708.16, | (908.52, | (0.04,  | 0.041  | (7.77,  | (11.19, | (-0.39, | 0.152  |
|                                          | 163.33)  | 179.39)  | 0.42)   |        | ,        | ,        | 0.19)   |        | 732.66)  | 929.81)  | 1.60)   |        | 10.65)  | 13.73)  | 2.51)   |        |
| <b>Men</b>                               |          |          |         |        | 2811.46) | 2898.74) |         |        |          |          |         |        |         |         |         |        |
|                                          | 159.43   | 166.50   | 0.15    |        | 1675.83  | 1766.16  | 0.20    |        | 2576.92  | 1971.14  | -0.91   |        | 43.74   | 32.95   | -0.97   |        |
| Afghanistan                              | (152.59, | (163.37, | (0.12,  | <0.001 | (1653.64 | (1755.97 | (0.08,  | 0.001  | (2547.68 | (1959.71 | (-1.12, | <0.001 | (39.96, | (31.47, | (-1.14, | <0.001 |
|                                          | 166.55)  | 169.69)  | 0.19)   |        | ,        | ,        | 0.32)   |        | ,        | ,        | -0.71)  |        | 47.82)  | 34.49)  | -0.80)  |        |

|                     |          |          |         |        |          |          |         |        |          |          |         |        |         |         |         |        |
|---------------------|----------|----------|---------|--------|----------|----------|---------|--------|----------|----------|---------|--------|---------|---------|---------|--------|
|                     |          |          |         |        | 1698.27) | 1776.39) |         |        | 2606.45) | 1982.62) |         |        |         |         |         |        |
|                     |          |          |         |        | 1957.61  | 1996.02  |         |        | 1127.23  | 1484.84  |         |        |         |         |         |        |
|                     | 145.48   | 149.26   | 0.10    |        |          |          | 0.07    |        |          |          | 0.80    | 16.95  | 23.09   | 0.89    |         |        |
| Albania             | (136.69, | (138.69, | (0.06,  | <0.001 | (1925.05 | (1956.85 | (0.04,  | <0.001 | (1102.38 | (1451.20 | (-0.19, | 0.114  | (14.01, | (19.05, | (-0.20, | 0.108  |
|                     | 154.71)  | 160.45)  | 0.13)   |        | ,        | ,        | 0.10)   |        | ,        | ,        | 1.80)   | 20.35) | 27.75)  | 1.99)   |         |        |
|                     |          |          |         |        | 1990.62) | 2035.81) |         |        | 1152.51) | 1519.08) |         |        |         |         |         |        |
|                     |          |          |         |        | 1507.99  | 1538.27  |         |        | 2125.75  | 1079.26  |         |        | 35.17   | 16.90   | -2.48   |        |
| Algeria             | (130.87, | (123.35, | (-0.25, | <0.001 | (1496.74 | (1530.09 | (-0.01, | 0.063  | (2112.06 | (1072.50 | (-2.52, | <0.001 | (33.41, | (16.07, | (-2.68, | <0.001 |
|                     | 137.64)  | 128.03)  | -0.20)  |        | ,        | ,        | 0.18)   |        | ,        | ,        | -1.92)  |        | 37.01)  | 17.77)  | -2.28)  |        |
|                     |          |          |         |        | 1519.31) | 1546.49) |         |        | 2139.51) | 1086.05) |         |        |         |         |         |        |
|                     |          |          |         |        | 1776.10  | 1744.41  |         |        | 2409.16  | 2267.09  |         |        | 39.51   | 37.24   | -0.23   |        |
| American Samoa      | (84.35,  | (76.03,  | (-0.27, | <0.001 | (1518.89 | (1489.45 | (-0.09, | 0.001  | (2101.04 | (1965.12 | (-0.38, | 0.003  | (9.66,  | (8.39,  | (-0.39, | 0.005  |
|                     | 257.22)  | 245.23)  | -0.24)  |        | ,        | ,        | -0.03)  |        | ,        | ,        | -0.08)  |        | 109.22) | 107.95) | -0.07)  |        |
|                     |          |          |         |        | 2066.52) | 2033.38) |         |        | 2751.26) | 2604.31) |         |        |         |         |         |        |
|                     | 79.58    | 75.07    | -0.20   |        | 485.94   | 467.28   | -0.11   |        | 419.88   | 288.05   | -1.29   |        | 6.62    | 4.38    | -1.42   |        |
| Andorra             | (40.05,  | (36.52,  | (-0.23, | <0.001 | (377.88, | (361.23, | (-0.24, | 0.080  | (320.18, | (207.41, | (-1.32, | <0.001 | (0.14,  | (0.02,  | (-1.47, | <0.001 |
|                     | 147.90)  | 141.93)  | -0.17)  |        | 619.94)  | 598.75)  | 0.01)   |        | 545.60)  | 394.24)  | -1.25)  |        | 49.22)  | 44.24)  | -1.36)  |        |
|                     |          |          |         |        | 2631.79  | 2666.75  | 0.06    |        | 1443.12  | 1147.73  | -0.76   |        | 22.19   | 17.17   | -0.85   |        |
| Angola              | (180.92, | (171.01, | (-0.26, | <0.001 | (2608.85 | (2652.56 | (0.00,  | 0.047  | (1425.72 | (1138.10 | (-1.46, | 0.032  | (20.06, | (15.99, | (-1.62, | 0.030  |
|                     | 193.26)  | 178.30)  | -0.21)  |        | ,        | ,        | 0.11)   |        | ,        | ,        | -0.07)  |        | 24.50)  | 18.41)  | -0.08)  |        |
|                     |          |          |         |        | 2654.89) | 2681.01) |         |        | 1460.69) | 1157.43) |         |        |         |         |         |        |
|                     |          |          |         |        | 2290.37  | 2260.98  | -0.05   |        | 1138.63  | 774.52   | -1.33   |        | 17.88   | 11.42   | -1.56   |        |
| Antigua and Barbuda | (108.98, | (117.32, | (-0.04, | <0.001 | (2029.74 | (2041.38 | (-0.07, | 0.002  | (953.95, | (648.93, | (-3.42, | 0.222  | (2.29,  | (1.36,  | (-3.95, | 0.211  |
|                     | 269.44)  | 249.28)  | -0.02)  |        | ,        | ,        | -0.02)  |        | 1349.85) | 917.91)  | 0.81)   |        | 65.52)  | 42.71)  | 0.89)   |        |
|                     |          |          |         |        | 2576.68) | 2498.25) |         |        |          |          |         |        |         |         |         |        |
|                     |          |          |         |        | 1419.63  | 1485.46  | 0.16    |        | 1438.93  | 720.55   | -2.42   |        | 23.47   | 10.87   | -2.68   |        |
| Argentina           | (122.64, | (117.36, | (-0.18, | <0.001 | (1410.12 | (1477.36 | (0.11,  | <0.001 | (1429.31 | (714.93, | (-2.60, | <0.001 | (22.25, | (10.19, | (-2.88, | <0.001 |
|                     | 128.32)  | 121.97)  | -0.16)  |        | ,        | ,        | 0.20)   |        | ,        | 726.20)  | -2.25)  |        | 24.73)  | 11.58)  | -2.48)  |        |
|                     |          |          |         |        | 1429.19) | 1493.59) |         |        | 1448.60) |          |         |        |         |         |         |        |
|                     |          |          |         |        | 1796.50  | 1698.31  | -0.20   |        | 1366.02  | 905.41   | -1.44   |        | 22.39   | 14.21   | -1.55   |        |
| Armenia             | (164.94, | (150.28, | (-0.32, | <0.001 | (1765.32 | (1664.46 | (-0.24, | <0.001 | (1338.68 | (881.59, | (-2.40, | 0.003  | (19.00, | (11.40, | (-2.59, | 0.004  |
|                     | 184.63)  | 171.56)  | -0.24)  |        | ,        | ,        | -0.15)  |        | ,        | 929.80)  | -0.48)  |        | 26.22)  | 17.62)  | -0.49)  |        |
|                     |          |          |         |        | 1828.12) | 1732.74) |         |        | 1393.78) |          |         |        |         |         |         |        |
| Australia           | 137.46   | 136.97   | -0.03   | 0.422  | 702.09   | 743.38   | 0.19    | <0.001 | 613.91   | 340.47   | -2.01   | <0.001 | 9.96    | 5.30    | -2.15   | <0.001 |

|            |          |          |         |        |           |           |         |        |           |           |         |        |         |         |         |        |
|------------|----------|----------|---------|--------|-----------|-----------|---------|--------|-----------|-----------|---------|--------|---------|---------|---------|--------|
|            | (133.60, | (133.54, | (-0.09, |        | (693.34,  | (735.42,  | (0.11,  |        | (605.72,  | (335.08,  | (-2.44, | (8.95, | (4.65,  | (-2.63, |         |        |
|            | 141.41)  | 140.48)  | 0.04)   |        | 710.93)   | 751.42)   | 0.28)   |        | 622.19)   | 345.94)   | -1.59)  | 11.07) | 6.02)   | -1.68)  |         |        |
|            | 98.78    | 91.60    | -0.26   |        | 611.43    | 576.05    | -0.21   |        | 679.17    | 271.32    | -3.12   | 11.03  | 3.98    | -3.46   |         |        |
| Austria    | (93.87,  | (86.85,  | (-0.29, | <0.001 | (599.10,  | (564.09,  | (-0.35, | 0.003  | (666.12,  | (263.15,  | (-3.69, | <0.001 | (9.42,  | (3.05,  | (-4.11, | <0.001 |
|            | 103.90)  | 96.57)   | -0.23)  |        | 623.97)   | 588.22)   | -0.07)  |        | 692.42)   | 279.70)   | -2.55)  |        | 12.86)  | 5.13)   | -2.81)  |        |
|            |          |          |         |        | 1702.75   | 1659.33   |         |        | 2089.44   | 1565.76   |         |        | 35.07   | 25.51   | -1.32   |        |
| Azerbaijan | (167.39, | (159.66, | (-0.21, | <0.001 | (1681.69, | (1642.34, | (-0.14, | <0.001 | (2065.44, | (1549.48, | (-2.09, | 0.017  | (31.99, | (23.48, | (-2.30, | 0.010  |
|            | 180.97)  | 170.51)  | -0.14)  |        | ,         | ,         | -0.04)  |        | ,         | ,         | -0.21)  |        | 38.37)  | 27.69)  | -0.32)  |        |
|            |          |          |         |        | 1724.02)  | 1676.48)  |         |        | 2113.65)  | 1582.19)  |         |        | 38.37)  | 27.69)  | -0.32)  |        |
|            |          |          |         |        | 2026.94   | 2008.97   |         |        | 1605.80   | 1587.85   |         |        | 26.53   | 26.39   | -0.07   |        |
| Bahamas    | (147.94, | (158.81, | (0.11,  | <0.001 | (1910.40, | (1907.84, | (-0.05, | 0.005  | (1499.15, | (1498.49, | (-0.79, | 0.835  | (14.38, | (16.03, | (-0.84, | 0.855  |
|            | 221.32)  | 223.13)  | 0.16)   |        | ,         | ,         | -0.01)  |        | ,         | ,         | 0.64)   |        | 45.21)  | 41.06)  | 0.70)   |        |
|            |          |          |         |        | 2149.16)  | 2114.17)  |         |        | 1718.35)  | 1681.26)  |         |        | 45.21)  | 41.06)  | 0.70)   |        |
|            |          |          |         |        |           |           |         |        | 1558.33   | 631.74    | -3.03   |        | 25.57   | 9.52    | -3.32   |        |
| Bahrain    | (83.59,  | (84.34,  | (-0.22, | <0.001 | (916.98,  | (880.52,  | (-0.23, | <0.001 | (1497.84, | (605.37,  | (-3.52, | <0.001 | (18.44, | (6.61,  | (-3.80, | <0.001 |
|            | 115.36)  | 104.84)  | -0.07)  |        | 1013.51)  | 942.71)   | -0.13)  |        | ,         | 659.17)   | -2.53)  |        | 35.40)  | 13.60)  | -2.83)  |        |
|            |          |          |         |        |           |           |         |        | 1621.24)  |           |         |        | 35.40)  | 13.60)  | -2.83)  |        |
|            |          |          |         |        | 1222.51   | 1316.59   |         |        | 1605.78   | 1238.95   |         |        | 26.33   | 20.08   | -0.93   |        |
| Bangladesh | (117.55, | (125.26, | (0.20,  | <0.001 | (1217.65, | (1312.63, | (0.20,  | <0.001 | (1600.13, | (1235.09, | (-1.53, | 0.011  | (25.60, | (19.59, | (-1.60, | 0.007  |
|            | 120.57)  | 127.72)  | 0.22)   |        | ,         | ,         | 0.33)   |        | ,         | ,         | -0.20)  |        | 27.07)  | 20.58)  | -0.25)  |        |
|            |          |          |         |        | 1227.39)  | 1320.57)  |         |        | 1611.45)  | 1242.82)  |         |        | 27.07)  | 20.58)  | -0.25)  |        |
|            |          |          |         |        | 2136.36   | 2145.07   |         |        | 1132.59   | 745.80    | -1.57   |        | 17.93   | 11.09   | -1.64   |        |
| Barbados   | (147.83, | (148.80, | (0.04,  | <0.001 | (2014.52, | (2017.76, | (-0.01, | 0.557  | (1044.10, | (672.14,  | (-2.48, | 0.001  | (8.42,  | (3.90,  | (-2.70, | 0.003  |
|            | 222.11)  | 226.92)  | 0.06)   |        | ,         | ,         | 0.03)   |        | ,         | 825.52)   | -0.65)  |        | 33.57)  | 25.12)  | -0.56)  |        |
|            |          |          |         |        | 2263.74)  | 2278.45)  |         |        | 1226.67)  |           |         |        | 33.57)  | 25.12)  | -0.56)  |        |
|            |          |          |         |        | 680.41    | 709.58    | 0.14    |        | 1930.88   | 1710.54   | -0.39   |        | 33.65   | 29.76   | -0.39   |        |
| Belarus    | (125.58, | (125.25, | (-0.05, | 0.887  | (669.26,  | (697.21,  | (0.06,  | 0.001  | (1912.16, | (1691.71, | (-1.39, | 0.446  | (31.23, | (27.34, | (-1.43, | 0.461  |
|            | 135.49)  | 136.22)  | 0.06)   |        | 691.71)   | 722.15)   | 0.22)   |        | ,         | ,         | 0.62)   |        | 36.23)  | 32.38)  | 0.66)   |        |
|            |          |          |         |        |           |           |         |        | 1949.75)  | 1729.57)  |         |        | 36.23)  | 32.38)  | 0.66)   |        |
|            |          |          |         |        | 558.04    | 568.40    | 0.08    |        | 684.10    | 249.00    | -3.42   |        | 11.11   | 3.56    | -3.86   |        |
| Belgium    | (75.29,  | (70.84,  | (-0.22, | <0.001 | (547.63,  | (557.58,  | (-0.01, | 0.069  | (672.60,  | (241.90,  | (-4.07, | <0.001 | (9.69,  | (2.76,  | (-4.53, | <0.001 |
|            | 83.20)   | 78.78)   | -0.18)  |        | 568.60)   | 579.40)   | 0.16)   |        | 695.77)   | 256.26)   | -2.77)  |        | 12.69)  | 4.53)   | -3.18)  |        |
|            |          |          |         |        |           |           |         |        |           |           |         |        | 12.69)  | 4.53)   | -3.18)  |        |
| Belize     | 178.72   | 189.14   | 0.20    | <0.001 | 1973.90   | 2060.27   | 0.15    | <0.001 | 901.95    | 1016.47   | 0.41    | 0.293  | 13.69   | 15.88   | 0.52    | 0.258  |

|                                        |                     |                     |                   |        |                           |                           |                   |        |                           |                           |                   |                  |                   |                   |                   |        |
|----------------------------------------|---------------------|---------------------|-------------------|--------|---------------------------|---------------------------|-------------------|--------|---------------------------|---------------------------|-------------------|------------------|-------------------|-------------------|-------------------|--------|
|                                        | (136.42,<br>231.16) | (161.00,<br>220.97) | (0.18,<br>0.21)   |        | (1827.29<br>,<br>2130.15) | (1965.07<br>,<br>2159.05) | (0.14,<br>0.17)   |        | (801.62,<br>1012.27)      | (948.71,<br>1087.91)      | (-0.35,<br>1.18)  | (3.98,<br>35.38) | (8.42,<br>27.38)  | (-0.38,<br>1.42)  |                   |        |
|                                        | 162.16              | 159.08              | -0.07             |        | 2486.49                   | 2573.32                   | 0.13              |        | 1229.82                   | 1077.50                   | -0.42             | 18.58            | 15.93             | -0.50             |                   |        |
| Benin                                  | (153.01,<br>171.74) | (153.83,<br>164.48) | (-0.07,<br>-0.06) | <0.001 | (2450.60<br>,<br>2522.79) | (2552.29<br>,<br>2594.49) | (0.05,<br>0.21)   | 0.002  | (1203.78<br>,<br>1256.32) | (1063.32<br>,<br>1091.84) | (-0.60,<br>-0.25) | <0.001           | (15.47,<br>22.17) | (14.22,<br>17.80) | (-0.69,<br>-0.30) | <0.001 |
|                                        | 111.67              | 111.43              | -0.01             |        | 1099.30                   | 1070.68                   | -0.10             |        | 1013.07                   | 475.08                    | -2.75             | 16.50            | 7.21              | -3.02             |                   |        |
| Bermuda                                | (62.64,<br>189.58)  | (54.82,<br>207.82)  | (-0.05,<br>0.03)  | 0.705  | (926.11,<br>1299.18)      | (869.27,<br>1308.76)      | (-0.15,<br>-0.05) | <0.001 | (849.74,<br>1202.68)      | (346.44,<br>640.71)       | (-3.12,<br>-2.37) | <0.001           | (2.37,<br>64.80)  | (0.05,<br>63.84)  | (-3.49,<br>-2.54) | <0.001 |
|                                        | 131.44              | 124.31              | -0.19             |        | 1302.29                   | 1280.84                   | -0.05             |        | 1350.69                   | 991.48                    | -1.05             | 21.93            | 15.57             | -1.17             |                   |        |
| Bhutan                                 | (112.18,<br>153.41) | (108.76,<br>141.54) | (-0.21,<br>-0.17) | <0.001 | (1238.88<br>,<br>1368.38) | (1229.82<br>,<br>1333.52) | (-0.17,<br>0.06)  | 0.377  | (1284.53<br>,<br>1419.61) | (946.66,<br>1037.96)      | (-1.19,<br>-0.91) | <0.001           | (14.15,<br>32.74) | (10.41,<br>22.49) | (-1.32,<br>-1.02) | <0.001 |
|                                        | 140.42              | 130.70              | -0.25             |        | 1825.92                   | 1815.59                   | -0.02             |        | 1298.31                   | 753.50                    | -1.86             | 20.34            | 10.98             | -2.10             |                   |        |
| Bolivia<br>(Plurinational<br>State of) | (133.70,<br>147.42) | (126.18,<br>135.35) | (-0.27,<br>-0.23) | <0.001 | (1801.33<br>,<br>1850.78) | (1798.62<br>,<br>1832.69) | (-0.04,<br>0.01)  | 0.289  | (1277.28<br>,<br>1319.61) | (742.52,<br>764.61)       | (-2.01,<br>-1.70) | <0.001           | (17.76,<br>23.20) | (9.69,<br>12.41)  | (-2.27,<br>-1.93) | <0.001 |
|                                        | 106.14              | 112.34              | 0.20              |        | 810.50                    | 877.25                    | 0.27              |        | 1170.81                   | 726.50                    | -1.84             | 19.50            | 11.37             | -2.09             |                   |        |
| Bosnia and<br>Herzegovina              | (99.88,<br>112.69)  | (103.67,<br>121.59) | (0.13,<br>0.27)   | <0.001 | (793.02,<br>828.29)       | (852.70,<br>902.38)       | (0.23,<br>0.31)   | <0.001 | (1149.82<br>,<br>1192.10) | (704.30,<br>749.27)       | (-2.32,<br>-1.36) | <0.001           | (16.88,<br>22.43) | (8.76,<br>14.57)  | (-2.59,<br>-1.57) | <0.001 |
|                                        | 196.42              | 175.56              | -0.39             |        | 2359.55                   | 2332.93                   | -0.04             |        | 1348.04                   | 1041.50                   | -0.82             | 20.80            | 15.70             | -0.90             |                   |        |
| Botswana                               | (178.23,<br>216.12) | (164.40,<br>187.30) | (-0.42,<br>-0.36) | <0.001 | (2295.50<br>,<br>2425.07) | (2291.76<br>,<br>2374.67) | (-0.07,<br>-0.02) | <0.001 | (1297.94<br>,<br>1399.69) | (1014.32<br>,<br>1069.25) | (-1.11,<br>-0.53) | <0.001           | (14.91,<br>28.36) | (12.53,<br>19.44) | (-1.22,<br>-0.58) | <0.001 |
|                                        | 163.49              | 140.75              | -0.52             |        | 1990.81                   | 1901.74                   | -0.15             |        | 1739.95                   | 924.64                    | -2.17             | 28.87            | 14.29             | -2.42             |                   |        |
| Brazil                                 | (162.04,<br>164.95) | (139.63,<br>141.88) | (-0.54,<br>-0.50) | <0.001 | (1985.75<br>,<br>1995.88) | (1897.62<br>,<br>1905.86) | (-0.17,<br>-0.12) | <0.001 | (1735.09<br>,<br>1744.83) | (921.81,<br>927.48)       | (-2.36,<br>-1.98) | <0.001           | (28.24,<br>29.50) | (13.94,<br>14.65) | (-2.66,<br>-2.18) | <0.001 |
|                                        | 134.24              | 122.40              | -0.32             |        | 779.90                    | 749.04                    | -0.10             |        | 1951.74                   | 1007.45                   | -2.33             | 32.24            | 16.80             | -2.30             |                   |        |
| Brunei Darussalam                      | (107.85,<br>165.42) | (102.94,<br>144.78) | (-0.34,<br>-0.30) | <0.001 | (714.28,<br>850.20)       | (700.28,<br>800.60)       | (-0.24,<br>0.05)  | 0.178  | (1846.83<br>,<br>1067.30) | (950.43,<br>1067.30)      | (-2.86,<br>-1.79) | <0.001           | (20.06,<br>49.44) | (10.20,<br>26.48) | (-2.84,<br>-1.76) | <0.001 |

|                          |          |          |         |        |          |          |         |        |          |          |         |        |         |         |         |        |
|--------------------------|----------|----------|---------|--------|----------|----------|---------|--------|----------|----------|---------|--------|---------|---------|---------|--------|
|                          |          |          |         |        |          |          |         |        | 2061.31) |          |         |        |         |         |         |        |
|                          | 114.88   | 112.78   | -0.07   |        | 1276.20  | 1324.19  | 0.13    |        | 2213.36  | 1617.81  | -1.00   |        | 37.40   | 26.95   | -1.03   |        |
| Bulgaria                 | (109.60, | (106.61, | (-0.08, | <0.001 | (1258.30 | (1301.81 | (0.06,  | <0.001 | (2190.11 | (1594.59 | (-1.26, | <0.001 | (34.45, | (24.07, | (-1.31, | <0.001 |
|                          | 120.35)  | 119.26)  | -0.05)  |        | ,        | ,        | 0.20)   |        | ,        | ,        | -0.73)  |        | 40.55)  | 30.14)  | -0.75)  |        |
|                          |          |          |         |        | 1294.30) | 1346.90) |         |        | 2236.80) | 1641.33) |         |        |         |         |         |        |
|                          |          |          |         |        | 2104.19  | 2149.91  | 0.08    |        | 969.24   | 1054.37  | 0.38    |        | 14.62   | 16.06   | 0.44    |        |
| Burkina Faso             | (143.59, | (147.77, | (0.02,  | <0.001 | (2079.42 | (2135.20 | (0.06,  | <0.001 | (951.64, | (1043.67 | (0.12,  | 0.004  | (12.50, | (14.74, | (0.13,  | 0.006  |
|                          | 157.03)  | 155.66)  | 0.05)   |        | ,        | ,        | 0.11)   |        | 987.10)  | ,        | 0.64)   |        | 17.02)  | 17.46)  | 0.75)   |        |
|                          |          |          |         |        | 2129.19) | 2164.71) |         |        |          | 1065.16) |         |        |         |         |         |        |
|                          |          |          |         |        | 2673.08  | 2683.92  | 0.02    |        | 1983.47  | 1297.61  | -1.47   |        | 31.06   | 19.55   | -1.64   |        |
| Burundi                  | (205.67, | (187.04, | (-0.40, | <0.001 | (2640.42 | (2662.18 | (-0.05, | 0.568  | (1954.79 | (1282.25 | (-1.76, | <0.001 | (27.52, | (17.69, | (-2.00, | <0.001 |
|                          | 224.34)  | 198.69)  | -0.35)  |        | ,        | ,        | 0.08)   |        | ,        | ,        | -1.18)  |        | 34.94)  | 21.56)  | -1.28)  |        |
|                          |          |          |         |        | 2706.07) | 2705.80) |         |        | 2012.50) | 1313.12) |         |        |         |         |         |        |
|                          |          |          |         |        | 2983.78  | 3050.75  | 0.08    |        | 1581.77  | 874.35   | -2.23   |        | 24.56   | 11.76   | -2.78   |        |
| Cabo Verde               | (130.70, | (133.13, | (-0.25, | <0.001 | (2839.08 | (2955.89 | (0.07,  | <0.001 | (1465.58 | (824.19, | (-2.53, | <0.001 | (11.82, | (6.63,  | (-3.12, | <0.001 |
|                          | 205.81)  | 176.85)  | -0.21)  |        | ,        | ,        | 0.09)   |        | ,        | 926.87)  | -1.93)  |        | 46.60)  | 19.46)  | -2.44)  |        |
|                          |          |          |         |        | 3135.47) | 3147.97) |         |        | 1705.82) |          |         |        |         |         |         |        |
|                          |          |          |         |        | 1151.37  | 1128.28  | -0.06   |        | 1482.20  | 1003.04  | -1.30   |        | 24.23   | 15.81   | -1.45   |        |
| Cambodia                 | (124.02, | (115.21, | (-0.31, | <0.001 | (1134.57 | (1117.23 | (-0.11, | 0.035  | (1462.52 | (992.56, | (-1.35, | <0.001 | (21.74, | (14.52, | (-1.58, | <0.001 |
|                          | 135.46)  | 122.43)  | -0.29)  |        | ,        | ,        | -0.00)  |        | ,        | 1013.60) | -1.24)  |        | 26.94)  | 17.19)  | -1.33)  |        |
|                          |          |          |         |        | 1168.37) | 1139.41) |         |        | 1502.09) |          |         |        |         |         |         |        |
|                          |          |          |         |        | 2247.28  | 2464.24  | 0.32    |        | 1090.22  | 1205.51  | 0.35    |        | 16.38   | 18.23   | 0.38    |        |
| Cameroon                 | (144.97, | (157.17, | (0.19,  | <0.001 | (2224.79 | (2451.38 | (0.30,  | <0.001 | (1074.04 | (1196.22 | (0.20,  | <0.001 | (14.42, | (17.09, | (0.21,  | <0.001 |
|                          | 156.81)  | 163.82)  | 0.24)   |        | ,        | ,        | 0.35)   |        | ,        | ,        | 0.50)   |        | 18.54)  | 19.43)  | 0.54)   |        |
|                          |          |          |         |        | 2269.95) | 2477.17) |         |        | 1106.60) | 1214.85) |         |        |         |         |         |        |
|                          |          |          |         |        | 1070.26  | 939.73   | -0.40   |        | 575.19   | 353.67   | -1.64   |        | 8.58    | 4.89    | -1.89   |        |
| Canada                   | (108.23, | (96.42,  | (-0.41, | <0.001 | (1061.90 | (932.04, | (-0.75, | 0.024  | (569.09, | (348.98, | (-1.92, | <0.001 | (7.86,  | (4.35,  | (-2.25, | <0.001 |
|                          | 113.64)  | 101.45)  | -0.37)  |        | ,        | 947.48)  | -0.05)  |        | 581.34)  | 358.41)  | -1.36)  |        | 9.36)   | 5.47)   | -1.54)  |        |
|                          |          |          |         |        | 1078.67) |          |         |        |          |          |         |        |         |         |         |        |
|                          |          |          |         |        | 2620.85  | 2627.82  | 0.01    |        | 1736.27  | 1587.27  | -0.35   |        | 27.13   | 24.78   | -0.36   |        |
| Central African Republic | (195.93, | (199.13, | (-0.02, | 0.136  | (2575.36 | (2595.39 | (-0.01, | 0.196  | (1698.00 | (1561.27 | (-0.65, | 0.026  | (22.46, | (21.59, | (-0.68, | 0.035  |
|                          | 222.16)  | 217.63)  | 0.00)   |        | ,        | ,        | 0.03)   |        | ,        | ,        | -0.04)  |        | 32.53)  | 28.33)  | -0.02)  |        |
|                          |          |          |         |        | 2667.02) | 2660.56) |         |        | 1775.24) | 1613.60) |         |        |         |         |         |        |

|               |          |          |         |        |          |          |         |        |          |          |         |        |         |         |         |        |
|---------------|----------|----------|---------|--------|----------|----------|---------|--------|----------|----------|---------|--------|---------|---------|---------|--------|
|               | 158.44   | 161.97   | 0.07    |        | 2210.42  | 2291.89  | 0.12    |        | 1135.01  | 1193.91  | 0.26    |        | 17.11   | 18.11   | 0.29    |        |
| Chad          | (150.35, | (156.96, | (0.07,  | <0.001 | (2180.04 | (2273.02 | (0.09,  | <0.001 | (1112.63 | (1179.74 | (-0.11, | 0.172  | (14.43, | (16.37, | (-0.12, | 0.167  |
|               | 166.88)  | 167.12)  | 0.08)   |        | ,        | ,        | 0.16)   |        | ,        | ,        | 0.63)   |        | 20.17)  | 19.99)  | 0.70)   |        |
|               |          |          |         |        | 2241.15) | 2310.90) |         |        | 1157.74) | 1208.22) |         |        |         |         |         |        |
|               | 72.46    | 75.98    | 0.16    |        | 479.01   | 527.17   | 0.35    |        | 657.47   | 471.47   | -1.11   |        | 10.62   | 7.42    | -1.20   |        |
| Chile         | (69.28,  | (73.12,  | (0.14,  | <0.001 | (470.78, | (519.59, | (0.25,  | <0.001 | (647.80, | (464.32, | (-1.46, | <0.001 | (9.42,  | (6.55,  | (-1.56, | <0.001 |
|               | 75.76)   | 78.92)   | 0.18)   |        | 487.36)  | 534.83)  | 0.45)   |        | 667.26)  | 478.71)  | -0.76)  |        | 11.94)  | 8.39)   | -0.83)  |        |
|               |          |          |         |        | 1177.55  | 1066.85  | -0.32   |        | 1284.47  | 1020.97  | -0.77   |        | 20.52   | 16.27   | -0.77   |        |
| China         | (115.69, | (104.20, | (-0.39, | <0.001 | (1176.27 | (1065.60 | (-0.38, | <0.001 | (1283.12 | (1019.77 | (-1.39, | 0.018  | (20.34, | (16.12, | (-1.47, | 0.031  |
|               | 116.50)  | 104.99)  | -0.34)  |        | ,        | ,        | -0.27)  |        | ,        | ,        | -0.13)  |        | 20.69)  | 16.42)  | -0.07)  |        |
|               |          |          |         |        | 1178.84) | 1068.11) |         |        | 1285.82) | 1022.17) |         |        |         |         |         |        |
|               | 74.33    | 67.85    | -0.32   |        | 652.29   | 649.86   | 0.00    |        | 996.10   | 554.23   | -2.07   |        | 16.47   | 8.85    | -2.19   |        |
| Colombia      | (72.22,  | (66.20,  | (-0.35, | <0.001 | (646.07, | (644.74, | (-0.06, | 0.899  | (988.33, | (549.50, | (-2.35, | <0.001 | (15.48, | (8.26,  | (-2.48, | <0.001 |
|               | 76.49)   | 69.53)   | -0.28)  |        | 658.56)  | 655.01)  | 0.07)   |        | 1003.93) | 558.99)  | -1.80)  |        | 17.52)  | 9.47)   | -1.90)  |        |
|               |          |          |         |        | 2733.79  | 2744.75  | 0.01    |        | 1250.60  | 972.58   | -0.88   |        | 18.75   | 14.04   | -1.01   |        |
| Comoros       | (168.76, | (159.64, | (-0.36, | <0.001 | (2616.62 | (2660.62 | (-0.01, | 0.277  | (1168.51 | (922.00, | (-2.88, | 0.396  | (9.83,  | (8.54,  | (-3.31, | 0.396  |
|               | 234.41)  | 203.76)  | -0.32)  |        | ,        | ,        | 0.04)   |        | ,        | 1025.28) | 1.16)   |        | 32.93)  | 21.84)  | 1.34)   |        |
|               |          |          |         |        | 2855.35) | 2830.94) |         |        | 1337.32) |          |         |        |         |         |         |        |
|               | 199.61   | 176.72   | -0.41   |        | 2758.38  | 2690.55  | -0.10   |        | 1920.80  | 1017.43  | -2.24   |        | 30.53   | 14.97   | -2.50   |        |
| Congo         | (186.39, | (168.65, | (-0.45, | <0.001 | (2709.00 | (2658.72 | (-0.15, | 0.001  | (1877.54 | (997.73, | (-2.81, | <0.001 | (25.22, | (12.66, | (-3.11, | <0.001 |
|               | 213.60)  | 185.09)  | -0.37)  |        | ,        | ,        | -0.04)  |        | ,        | 1037.44) | -1.66)  |        | 36.70)  | 17.59)  | -1.89)  |        |
|               |          |          |         |        | 2808.52) | 2722.67) |         |        | 1964.86) |          |         |        |         |         |         |        |
|               | 112.83   | 113.36   | 0.01    |        | 1074.19  | 1093.20  | 0.07    |        | 2315.47  | 2047.38  | -0.42   |        | 38.60   | 34.19   | -0.41   |        |
| Cook Islands  | (31.58,  | (23.69,  | (-0.02, | 0.368  | (767.52, | (735.37, | (0.02,  | 0.004  | (1846.07 | (1540.14 | (-0.57, | <0.001 | (2.33,  | (0.63,  | (-0.57, | <0.001 |
|               | 296.67)  | 333.03)  | 0.04)   |        | 1470.79) | 1567.29) | 0.11)   |        | 2874.30) | 2670.07) | -0.26)  |        | 187.00) | 207.60) | -0.25)  |        |
|               |          |          |         |        | 1794.79  | 1823.59  | 0.05    |        | 816.46   | 685.15   | -0.36   |        | 12.54   | 10.17   | -0.44   |        |
| Costa Rica    | (124.17, | (127.22, | (0.03,  | <0.001 | (1761.59 | (1796.32 | (0.02,  | 0.004  | (793.65, | (668.58, | (-0.93, | 0.207  | (9.84,  | (8.25,  | (-1.09, | 0.185  |
|               | 142.51)  | 142.25)  | 0.05)   |        | ,        | ,        | 0.08)   |        | 839.79)  | 702.05)  | 0.20)   |        | 15.79)  | 12.43)  | 0.21)   |        |
|               |          |          |         |        | 1828.49) | 1851.19) |         |        |          |          |         |        |         |         |         |        |
|               | 176.87   | 168.83   | -0.16   |        | 2549.72  | 2547.04  | 0.01    |        | 1441.24  | 1172.66  | -0.71   |        | 21.99   | 17.51   | -0.79   |        |
| Cote d'Ivoire | (171.42, | (165.36, | (-0.18, | <0.001 | (2529.08 | (2533.57 | (-0.04, | 0.744  | (1425.33 | (1163.39 | (-0.94, | <0.001 | (20.04, | (16.39, | (-1.05, | <0.001 |
|               | 182.46)  | 172.36)  | -0.15)  |        | ,        | ,        | 0.05)   |        | ,        | ,        | -0.48)  |        | 24.09)  | 18.70)  | -0.52)  |        |

|                   |          |          |         |        |          |          |         |        |          |          |         |        |         |         |         |        |
|-------------------|----------|----------|---------|--------|----------|----------|---------|--------|----------|----------|---------|--------|---------|---------|---------|--------|
|                   |          |          |         |        | 2570.49) | 2560.57) |         |        | 1457.29) | 1182.00) |         |        |         |         |         |        |
|                   | 97.18    | 99.28    | 0.08    |        | 718.04   | 740.39   | 0.14    |        | 1115.96  | 445.63   | -3.04   | 18.84  | 6.98    | -3.28   |         |        |
| Croatia           | (91.09,  | (92.06,  | (0.01,  | 0.021  | (701.49, | (720.75, | (-0.01, | 0.071  | (1095.39 | (430.48, | (-3.93, | <0.001 | (16.27, | (5.22,  | (-4.30, | <0.001 |
|                   | 103.60)  | 106.99)  | 0.14)   |        | 734.92)  | 760.50)  | 0.29)   |        | ,        | 461.23)  | -2.15)  | 21.74) | 9.24)   | -2.26)  |         |        |
|                   |          |          |         |        | 1964.23  | 1910.45  |         |        | 1120.29  |          |         |        |         |         |         |        |
|                   | 171.77   | 168.20   | -0.07   |        | (1946.17 | (1890.73 | -0.10   |        | (1106.26 | 642.78   | -1.87   | 17.95  | 9.61    | -2.11   |         |        |
| Cuba              | (166.46, | (162.38, | (-0.09, | <0.001 | ,        | ,        | (-0.11, | <0.001 | ,        | (631.48, | (-2.27, | <0.001 | (16.19, | (8.28,  | (-2.56, | <0.001 |
|                   | 177.22)  | 174.18)  | -0.06)  |        | 1982.42) | 1930.33) | -0.08)  |        | 1134.46) | 654.24)  | -1.47)  | 19.85) | 11.11)  | -1.66)  |         |        |
|                   | 66.70    | 65.46    | -0.06   |        | 411.00   | 439.09   | 0.31    |        | 694.40   | 489.90   | -1.29   | 11.50  | 7.92    | -1.34   |         |        |
| Cyprus            | (54.63,  | (56.12,  | (-0.07, | <0.001 | (380.09, | (414.46, | (-0.00, | 0.051  | (654.01, | (464.34, | (-1.76, | <0.001 | (6.85,  | (5.01,  | (-1.82, | <0.001 |
|                   | 80.73)   | 76.24)   | -0.06)  |        | 443.82)  | 465.10)  | 0.61)   |        | 736.69)  | 516.81)  | -0.81)  | 18.22) | 12.39)  | -0.86)  |         |        |
|                   | 123.31   | 122.86   | -0.00   |        | 1012.03  | 1016.26  | 0.04    |        | 1140.30  | 422.13   | -3.40   | 19.02  | 6.21    | -3.84   |         |        |
| Czechia           | (118.41, | (117.62, | (-0.02, | 0.814  | (997.93, | (1001.13 | (-0.00, | 0.069  | (1125.54 | (412.58, | (-3.84, | <0.001 | (17.17, | (5.12,  | (-4.37, | <0.001 |
|                   | 128.36)  | 128.30)  | 0.02)   |        | 1026.30) | 1031.59) | 0.08)   |        | ,        | 431.88)  | -2.96)  | 21.03) | 7.50)   | -3.31)  |         |        |
|                   | 130.57   | 130.88   | 0.01    |        | 1180.23  | 1181.64  | 0.01    |        | 1673.20  | 1669.48  | -0.01   | 27.12  | 26.95   | -0.03   |         |        |
| Democratic        | (126.97, | (127.85, | (-0.00, | 0.238  | (1169.34 | (1172.51 | (-0.02, | 0.652  | (1660.18 | (1658.69 | (-0.13, | 0.924  | (25.48, | (25.60, | (-0.10, | 0.522  |
| People's Republic | 134.25)  | 133.98)  | 0.02)   |        | ,        | ,        | 0.03)   |        | ,        | ,        | 0.12)   | 28.84) | 28.36)  | 0.05)   |         |        |
| of Korea          |          |          |         |        | 1191.20) | 1190.84) |         |        | 1686.29) | 1680.34) |         |        |         |         |         |        |
|                   | 181.99   | 179.15   | -0.05   |        | 2582.71  | 2566.53  | -0.02   |        | 1198.29  | 1020.91  | -0.57   | 18.20  | 15.21   | -0.64   |         |        |
| Democratic        | (178.76, | (177.14, | (-0.08, | <0.001 | (2570.52 | (2558.89 | (-0.05, | 0.112  | (1189.65 | (1015.91 | (-0.72, | <0.001 | (17.13, | (14.59, | (-0.81, | <0.001 |
| Republic of the   | 185.25)  | 181.18)  | -0.03)  |        | ,        | ,        | 0.01)   |        | ,        | ,        | -0.42)  | 19.32) | 15.84)  | -0.47)  |         |        |
| Congo             |          |          |         |        | 2594.95) | 2574.18) |         |        | 1206.98) | 1025.93) |         |        |         |         |         |        |
|                   | 93.20    | 78.31    | -0.60   |        | 612.76   | 528.94   | -0.50   |        | 575.75   | 208.50   | -3.52   | 9.43   | 2.95    | -4.02   |         |        |
| Denmark           | (87.32,  | (72.73,  | (-0.62, | <0.001 | (597.54, | (514.27, | (-0.59, | <0.001 | (561.07, | (199.35, | (-4.41, | <0.001 | (7.64,  | (1.96,  | (-5.12, | <0.001 |
|                   | 99.38)   | 84.22)   | -0.59)  |        | 628.29)  | 543.94)  | -0.40)  |        | 590.74)  | 217.99)  | -2.61)  | 11.54) | 4.30)   | -2.90)  |         |        |
|                   | 185.61   | 180.27   | -0.10   |        | 2634.68  | 2753.48  | 0.15    |        | 1297.58  | 1147.51  | -0.39   | 19.63  | 16.96   | -0.46   |         |        |
| Djibouti          | (160.11, | (164.38, | (-0.11, | <0.001 | (2535.51 | (2690.29 | (0.12,  | <0.001 | (1225.62 | (1106.74 | (-0.94, | 0.159  | (11.59, | (12.33, | (-1.11, | 0.164  |
|                   | 214.42)  | 197.29)  | -0.09)  |        | ,        | ,        | 0.19)   |        | ,        | ,        | 0.15)   | 31.45) | 22.78)  | 0.19)   |         |        |
|                   | 181.77   | 183.83   | 0.04    |        | 2737.08) | 2817.80) |         |        | 1372.94) | 1189.42) |         |        |         |         |         |        |
| Dominica          | (118.50, | (117.98, | (0.02,  | <0.001 | 1985.21  | 1990.39  | 0.01    | 0.038  | 1300.30  | 1045.88  | -0.77   | <0.001 | 20.95   | 16.55   | -0.81   | <0.001 |
|                   |          |          |         |        | (1759.99 | (1756.45 | (0.00,  |        | (1114.65 | (877.89, | (-1.05, |        | (3.93,  | (2.25,  | (-1.23, |        |



|                    |          |          |         |        |          |          |         |        |          |          |          |         |        |         |         |         |        |
|--------------------|----------|----------|---------|--------|----------|----------|---------|--------|----------|----------|----------|---------|--------|---------|---------|---------|--------|
|                    | 268.89)  | 273.44)  | 0.05)   |        | ,        | ,        | 0.02)   |        | ,        | 1236.83) | -0.49)   |         | 65.93) | 57.63)  | -0.39)  |         |        |
|                    |          |          |         |        | 2232.91) | 2247.03) |         |        |          | 1509.30) |          |         |        |         |         |         |        |
|                    |          |          |         |        | 1986.65  | 2062.03  |         |        |          | 1481.86  | 1549.52  |         |        |         |         |         |        |
| Dominican Republic | 176.04   | 185.25   | 0.18    |        | (1963.12 | (2043.35 | 0.13    |        |          | (1460.95 | (1533.26 | 0.22    |        | 23.87   | 25.31   | 0.27    |        |
|                    | (169.05, | (179.67, | (0.17,  | <0.001 |          |          | (0.11,  | <0.001 |          |          |          | (-0.31, | 0.414  | (21.25, | (23.27, | (-0.30, | 0.356  |
|                    | 183.27)  | 190.95)  | 0.18)   |        | ,        | ,        | 0.15)   |        | ,        | ,        |          | 0.76)   |        | 26.74)  | 27.49)  | 0.85)   |        |
|                    |          |          |         |        | 2010.42) | 2080.83) |         |        |          | 1503.00) | 1565.91) |         |        |         |         |         |        |
|                    |          |          |         |        | 1748.36  | 1751.83  |         |        |          | 1428.51  | 1114.55  |         |        |         |         |         |        |
| Ecuador            | 134.96   | 130.06   | -0.13   |        | (1729.72 | (1738.09 | 0.01    |        |          | (1411.40 | (1103.53 | -1.00   |        | 22.62   | 17.26   | -1.08   |        |
|                    | (129.85, | (126.34, | (-0.14, | <0.001 |          |          | (-0.00, | 0.102  |          |          |          | (-1.51, | <0.001 | (20.49, | (15.90, | (-1.63, | <0.001 |
|                    | 140.23)  | 133.85)  | -0.12)  |        | ,        | ,        | 0.03)   |        | ,        | ,        |          | -0.48)  |        | 24.92)  | 18.70)  | -0.53)  |        |
|                    |          |          |         |        | 2189.92  | 2349.89  |         |        |          | 3411.50  | 2498.87  |         |        |         |         |         |        |
|                    | 144.25   | 148.98   | 0.11    |        | (2181.08 | (2343.32 | 0.25    |        |          | (3400.33 | (2492.10 | -1.06   |        | 55.49   | 39.43   | -1.17   |        |
| Egypt              | (141.96, | (147.32, | (0.08,  | <0.001 |          |          | (0.21,  | <0.001 |          |          |          | (-1.54, | <0.001 | (54.06, | (38.58, | (-1.66, | <0.001 |
|                    | 146.57)  | 150.64)  | 0.15)   |        | ,        | ,        | 0.30)   |        | ,        | ,        |          | -0.59)  |        | 56.95)  | 40.29)  | -0.68)  |        |
|                    |          |          |         |        | 2198.79) | 2356.46) |         |        |          | 3422.70) | 2505.67) |         |        |         |         |         |        |
|                    |          |          |         |        | 1657.44  | 1721.35  |         |        |          | 2009.61  |          |         |        |         |         |         |        |
| El Salvador        | 141.19   | 137.39   | -0.09   |        | (1631.28 | (1697.72 | 0.13    |        |          | (1980.10 | 928.61   | -2.55   |        | 32.47   | 14.48   | -2.66   |        |
|                    | (133.64, | (130.78, | (-0.11, | <0.001 |          |          | (0.11,  | <0.001 |          |          |          | (-3.79, | <0.001 | (28.77, | (12.30, | (-4.01, | <0.001 |
|                    | 149.09)  | 144.27)  | -0.08)  |        | ,        | ,        | 0.16)   |        | ,        | 946.74)  |          | -1.29)  |        | 36.54)  | 16.94)  | -1.30)  |        |
|                    |          |          |         |        | 1683.95) | 1745.24) |         |        |          | 2039.48) |          |         |        |         |         |         |        |
|                    |          |          |         |        | 2735.67  | 2585.65  |         |        |          | 1710.01  |          |         |        |         |         |         |        |
| Equatorial Guinea  | 203.06   | 156.45   | -0.90   |        | (2608.55 | (2531.16 | -0.19   |        |          | (1607.13 | 722.14   | -2.93   |        | 26.67   | 9.86    | -3.38   |        |
|                    | (169.45, | (143.27, | (-0.94, | <0.001 |          |          | (-0.23, | <0.001 |          |          |          | (-3.25, | <0.001 | (15.15, | (6.54,  | (-3.74, | <0.001 |
|                    | 241.90)  | 170.70)  | -0.87)  |        | ,        | ,        | -0.16)  |        | ,        | 753.38)  |          | -2.62)  |        | 44.00)  | 14.40)  | -3.01)  |        |
|                    |          |          |         |        | 2867.84) | 2641.18) |         |        |          | 1818.10) |          |         |        |         |         |         |        |
|                    |          |          |         |        | 2943.64  | 2904.82  |         |        |          | 1751.25  | 1513.16  |         |        |         |         |         |        |
| Eritrea            | 230.30   | 202.69   | -0.45   |        | (2897.98 | (2876.78 | -0.05   |        |          | (1714.71 | (1492.29 | -0.54   |        | 27.17   | 23.32   | -0.57   |        |
|                    | (217.70, | (195.40, | (-0.50, | <0.001 |          |          | (-0.10, | 0.122  |          |          |          | (-0.90, | 0.004  | (22.72, | (20.76, | (-0.96, | 0.004  |
|                    | 243.51)  | 210.21)  | -0.39)  |        | ,        | ,        | 0.01)   |        | ,        | ,        |          | -0.17)  |        | 32.29)  | 26.11)  | -0.18)  |        |
|                    |          |          |         |        | 2989.90) | 2933.07) |         |        |          | 1788.42) | 1534.26) |         |        |         |         |         |        |
|                    |          |          |         |        | 789.69   | 831.98   |         |        |          | 1720.38  |          |         |        |         |         |         |        |
| Estonia            | 152.53   | 147.79   | -0.09   |        | (758.19, | (795.04, | 0.17    |        |          | (1674.07 | 586.67   | -3.57   |        | 29.90   | 9.49    | -4.40   |        |
|                    | (138.84, | (132.39, | (-0.14, | <0.001 |          |          | (0.12,  | <0.001 |          |          |          | (-4.48, | <0.001 | (24.09, | (6.04,  | (-4.95, | <0.001 |
|                    | 167.25)  | 164.79)  | -0.05)  |        | 822.21)  | 870.47)  | 0.22)   |        | ,        | 618.45)  |          | -2.65)  |        | 36.77)  | 14.65)  | -3.85)  |        |
|                    |          |          |         |        |          |          |         |        | 1767.71) |          |          |         |        |         |         |         |        |
|                    |          |          |         |        | 2251.36  | 2307.73  |         |        |          | 976.60   | 1281.72  |         |        |         |         |         |        |
| Eswatini           | 181.74   | 189.18   | 0.14    |        | (2167.40 | (2246.99 | 0.09    |        |          | (919.43, | (1235.44 | 0.91    |        | 14.53   | 19.95   | 1.06    |        |
|                    | (158.54, | (172.07, | (0.11,  | <0.001 |          |          | (0.06,  | <0.001 |          |          |          | (0.63,  | <0.001 | (8.23,  | (14.51, | (0.74,  | <0.001 |
|                    | 207.68)  | 207.60)  | 0.18)   |        | ,        | ,        | 0.11)   |        | 1036.62) | ,        | 1.18)    |         |        | 24.01)  | 26.82)  | 1.38)   |        |

|          |          |          |         |        |          |          |         |        |          |          |         |        |         |         |         |        |
|----------|----------|----------|---------|--------|----------|----------|---------|--------|----------|----------|---------|--------|---------|---------|---------|--------|
|          |          |          |         |        | 2338.01) | 2369.78) |         |        |          | 1329.34) |         |        |         |         |         |        |
|          |          |          |         |        | 2171.05  | 2430.88  |         |        | 1538.34  | 855.59   | -2.00   | 24.10  | 12.22   | -2.32   |         |        |
| Ethiopia | 172.18   | 167.65   | -0.08   |        | (2161.00 | (2424.12 | 0.40    | <0.001 | (1529.67 | (851.44, | (-2.11, | <0.001 | (23.01, | (11.72, | (-2.44, | <0.001 |
|          | (169.38, | (165.90, | (-0.11, | <0.001 | ,        | ,        | 0.46)   |        | ,        | 859.75)  | -1.88)  |        | (25.23) | 12.73)  | -2.20)  |        |
|          | 175.02)  | 169.42)  | -0.05)  |        | 2181.15) | 2437.65) |         |        | 1547.06) |          |         |        |         |         |         |        |
|          |          |          |         |        | 1459.47  | 1660.34  |         |        | 3755.35  | 2836.07  |         |        | 63.48   | 47.09   | -1.07   |        |
| Fiji     | 130.89   | 134.05   | 0.08    |        | (1400.17 | (1602.03 | 0.46    | <0.001 | (3658.34 | (2760.06 | -1.01   |        | (51.36, | (37.76, | (-1.64, | <0.001 |
|          | (113.51, | (117.87, | (0.07,  | <0.001 | ,        | ,        | 0.60)   |        | ,        | ,        | -0.48)  |        | (77.69) | 58.05)  | -0.50)  |        |
|          | 150.29)  | 151.85)  | 0.10)   |        | 1520.73) | 1720.25) |         |        | 3854.35) | 2913.66) |         |        |         |         |         |        |
|          |          |          |         |        | 615.87   | 557.86   | -0.34   |        | 998.82   | 364.48   | -3.48   |        | 17.01   | 5.67    | -3.79   |        |
| Finland  | 103.86   | 90.55    | -0.47   |        | (600.49, | (542.62, | (-0.46, | <0.001 | (979.63, | (352.33, | (-4.12, | <0.001 | (14.61, | (4.26,  | (-4.64, | <0.001 |
|          | (97.61,  | (84.47,  | (-0.50, | <0.001 | 631.58)  | 573.46)  | -0.21)  |        | 1018.33) | 376.98)  | -2.84)  |        | 19.76)  | 7.46)   | -2.93)  |        |
|          | 110.45)  | 97.00)   | -0.45)  |        | 633.42   | 571.14   | -0.35   |        | 606.09   | 298.33   | -2.48   |        | 9.80    | 4.44    | -2.78   |        |
| France   | 79.85    | 73.30    | -0.29   |        | (628.79, | (566.50, | (-0.47, | <0.001 | (601.60, | (295.01, | (-2.98, | <0.001 | (9.24,  | (4.04,  | (-3.37, | <0.001 |
|          | (78.21,  | (71.65,  | (-0.32, | <0.001 | 638.08)  | 575.81)  | -0.24)  |        | 610.61)  | 301.69)  | -1.98)  |        | 10.39)  | 4.86)   | -2.19)  |        |
|          | 81.50)   | 74.98)   | -0.27)  |        | 2609.15  | 2609.91  |         |        | 1455.55  | 1038.90  |         |        | 22.50   | 15.33   | -1.33   |        |
| Gabon    | 171.97   | 163.69   | -0.17   |        | (2536.87 | (2556.50 | 0.00    |        | (1400.42 | (1004.71 | -1.17   |        | (16.07, | (11.40, | (-1.89, | <0.001 |
|          | (153.73, | (150.50, | (-0.18, | <0.001 | ,        | ,        | 0.03)   |        | ,        | ,        | -0.66)  |        | (30.73) | 20.21)  | -0.76)  |        |
|          | 191.87)  | 177.77)  | -0.16)  |        | 2683.06) | 2664.19) |         |        | 1512.36) | 1074.00) |         |        |         |         |         |        |
|          |          |          |         |        | 2534.42  | 2655.20  |         |        | 1157.50  | 1215.58  |         |        | 17.20   | 18.06   | 0.24    |        |
| Gambia   | 167.93   | 174.43   | 0.13    |        | (2459.40 | (2606.57 | 0.17    | <0.001 | (1105.30 | (1181.74 | 0.24    |        | (11.30, | (14.10, | (-0.99, | 0.698  |
|          | (148.89, | (162.04, | (0.12,  | <0.001 | ,        | ,        | 0.21)   |        | ,        | ,        | (-0.85, | 0.671  | (11.30, | (14.10, | (-0.99, | 0.698  |
|          | 188.94)  | 187.58)  | 0.14)   |        | 2611.35) | 2704.58) |         |        | 1211.69) | 1250.19) | 1.34)   |        | 25.29)  | 22.85)  | 1.49)   |        |
|          |          |          |         |        | 1966.83  | 2029.98  |         |        | 2873.73  | 2002.44  |         |        | 48.66   | 33.26   | -1.34   |        |
| Georgia  | 190.17   | 187.47   | -0.04   |        | (1940.05 | (1994.42 | 0.10    | <0.001 | (2841.37 | (1968.28 | -1.27   |        | (44.52, | (29.02, | (-2.92, | 0.100  |
|          | (181.91, | (176.84, | (-0.08, | 0.027  | ,        | ,        | 0.14)   |        | ,        | ,        | 0.31)   |        | 53.08)  | 38.02)  | 0.26)   |        |
|          | 198.71)  | 198.63)  | -0.01)  |        | 1993.90) | 2066.06) |         |        | 2906.37) | 2037.11) |         |        |         |         |         |        |
|          |          |          |         |        | 650.44   | 571.69   | -0.43   |        | 942.79   | 341.88   | -3.47   |        | 15.65   | 5.21    | -3.75   |        |
| Germany  | 96.51    | 84.19    | -0.47   |        | (646.45, | (567.74, | (-0.52, | <0.001 | (938.01, | (338.86, | (-3.70, | <0.001 | (15.05, | (4.84,  | (-4.02, | <0.001 |
|          | (94.99,  | (82.68,  | (-0.51, | <0.001 | 654.45)  | 575.66)  | -0.34)  |        | 947.60)  | 344.93)  | -3.23)  |        | 16.28)  | 5.59)   | -3.49)  |        |
|          | 98.06)   | 85.72)   | -0.43)  |        | 158.57   | 166.41   | 0.17    |        | 1066.11  | 1097.92  | 0.10    |        | 15.70   | 16.19   | 0.11    |        |
| Ghana    | 158.57   | 166.41   | 0.17    |        | (2473.56 | (2549.66 | 0.10    | <0.001 | (1053.35 | (1089.61 | (-0.07, | 0.242  | (14.17, | (15.18, | (-0.10, | 0.302  |
|          | (153.79, | (163.24, | (0.16,  | <0.001 | ,        | ,        | 0.12)   |        | ,        | ,        | 0.27)   |        | 17.36)  | 17.24)  | 0.31)   |        |
|          | 163.47)  | 169.64)  | 0.18)   |        |          |          |         |        |          |          |         |        |         |         |         |        |

|               |          |          |         |        |          |          |         |        |          |          |         |        |         |         |         |        |
|---------------|----------|----------|---------|--------|----------|----------|---------|--------|----------|----------|---------|--------|---------|---------|---------|--------|
|               |          |          |         |        | 2511.60) | 2574.55) |         |        | 1078.99) | 1106.28) |         |        |         |         |         |        |
|               | 82.02    | 74.76    | -0.32   |        | 478.48   | 450.48   | -0.19   |        | 936.01   | 680.64   | -1.22   |        | 15.57   | 11.37   | -1.21   |        |
| Greece        | (78.01,  | (70.51,  | (-0.34, | <0.001 | (468.71, | (440.05, | (-0.39, | 0.074  | (922.34, | (668.03, | (-1.57, | <0.001 | (13.85, | (9.81,  | (-1.59, | <0.001 |
|               | 86.20)   | 79.22)   | -0.30)  |        | 488.40)  | 461.11)  | 0.02)   |        | 949.83)  | 693.46)  | -0.87)  |        | 17.44)  | 13.13)  | -0.84)  |        |
|               | 125.82   | 105.27   | -0.62   |        | 1092.99  | 937.97   | -0.49   |        | 1054.67  | 536.55   | -2.28   |        | 17.31   | 8.22    | -2.53   |        |
| Greenland     | (75.07,  | (53.21,  | (-0.64, | <0.001 | (930.13, | (764.25, | (-0.71, | <0.001 | (895.09, | (407.78, | (-2.47, | <0.001 | (2.95,  | (0.15,  | (-2.72, | <0.001 |
|               | 205.25)  | 191.91)  | -0.60)  |        | 1281.58) | 1143.10) | -0.26)  |        | 1239.98) | 697.13)  | -2.09)  |        | 66.52)  | 58.69)  | -2.33)  |        |
|               | 194.11   | 193.70   | -0.01   |        | 2180.19  | 2184.93  | 0.01    |        | 1827.34  | 933.32   | -2.36   |        | 30.56   | 14.44   | -2.65   |        |
| Grenada       | (131.59, | (138.11, | (-0.02, | 0.145  | (1956.63 | (1987.34 | (-0.01, | 0.316  | (1616.20 | (803.49, | (-2.60, | <0.001 | (9.10,  | (2.77,  | (-2.92, | <0.001 |
|               | 277.84)  | 265.26)  | 0.00)   |        | ,        | ,        | 0.03)   |        | ,        | 1078.87) | -2.12)  |        | 76.27)  | 44.83)  | -2.37)  |        |
|               |          |          |         |        | 2423.77) | 2397.74) |         |        | 2059.39) |          |         |        |         |         |         |        |
|               | 119.75   | 139.45   | 0.53    |        | 1467.87  | 1621.51  | 0.35    |        | 1506.53  | 2389.77  | 1.59    |        | 23.82   | 40.02   | 1.79    |        |
| Guam          | (85.81,  | (100.89, | (0.50,  | <0.001 | (1341.80 | (1482.65 | (0.29,  | <0.001 | (1378.08 | (2217.78 | (1.04,  | <0.001 | (10.25, | (20.59, | (1.16,  | <0.001 |
|               | 163.16)  | 188.29)  | 0.56)   |        | ,        | ,        | 0.41)   |        | ,        | ,        | 2.14)   |        | 47.60)  | 70.40)  | 2.42)   |        |
|               |          |          |         |        | 1603.01) | 1770.24) |         |        | 1644.10) | 2571.77) |         |        |         |         |         |        |
|               | 150.14   | 141.10   | -0.22   |        | 1724.49  | 1860.95  | 0.26    |        | 1745.09  | 1047.09  | -1.80   |        | 28.04   | 16.36   | -1.89   |        |
| Guatemala     | (143.63, | (137.31, | (-0.23, | <0.001 | (1702.29 | (1847.09 | (0.23,  | <0.001 | (1722.28 | (1036.39 | (-2.31, | <0.001 | (25.19, | (15.03, | (-2.43, | <0.001 |
|               | 156.88)  | 144.98)  | -0.21)  |        | ,        | ,        | 0.29)   |        | ,        | ,        | -1.29)  |        | 31.14)  | 17.78)  | -1.34)  |        |
|               |          |          |         |        | 1746.93) | 1874.89) |         |        | 1768.15) | 1057.89) |         |        |         |         |         |        |
|               | 136.85   | 151.96   | 0.36    |        | 1966.53  | 2261.18  | 0.47    |        | 1044.46  | 1223.24  | 0.58    |        | 15.73   | 18.63   | 0.63    |        |
| Guinea        | (129.44, | (146.62, | (0.32,  | <0.001 | (1938.46 | (2240.76 | (0.42,  | <0.001 | (1023.55 | (1207.67 | (0.40,  | <0.001 | (13.23, | (16.73, | (0.43,  | <0.001 |
|               | 144.59)  | 157.45)  | 0.40)   |        | ,        | ,        | 0.53)   |        | ,        | ,        | 0.77)   |        | 18.58)  | 20.71)  | 0.84)   |        |
|               |          |          |         |        | 1994.92) | 2281.75) |         |        | 1065.71) | 1238.97) |         |        |         |         |         |        |
|               | 184.71   | 185.59   | 0.01    |        | 2056.57  | 2140.04  | 0.14    |        | 1778.95  | 1627.94  | -0.29   |        | 28.23   | 25.78   | -0.30   |        |
| Guinea-Bissau | (164.06, | (171.73, | (0.00,  | 0.017  | (1986.36 | (2092.39 | (0.12,  | <0.001 | (1712.18 | (1585.28 | (-0.37, | <0.001 | (20.29, | (20.61, | (-0.38, | <0.001 |
|               | 207.44)  | 200.36)  | 0.03)   |        | ,        | ,        | 0.17)   |        | ,        | ,        | -0.22)  |        | 38.43)  | 31.93)  | -0.22)  |        |
|               |          |          |         |        | 2128.83) | 2188.58) |         |        | 1847.82) | 1671.51) |         |        |         |         |         |        |
|               | 223.33   | 211.18   | -0.19   |        | 2137.86  | 2062.13  | -0.12   |        | 2838.32  | 2050.78  | -0.92   |        | 47.68   | 34.27   | -0.93   |        |
| Guyana        | (200.48, | (188.64, | (-0.22, | <0.001 | (2066.12 | (1990.53 | (-0.14, | <0.001 | (2753.32 | (1977.37 | (-1.76, | 0.034  | (37.15, | (25.31, | (-1.79, | 0.036  |
|               | 248.23)  | 235.79)  | -0.16)  |        | ,        | ,        | -0.09)  |        | ,        | ,        | -0.07)  |        | 60.38)  | 45.45)  | -0.06)  |        |
|               |          |          |         |        | 2211.60) | 2135.75) |         |        | 2925.38) | 2126.28) |         |        |         |         |         |        |
|               | 206.42   | 204.00   | -0.05   |        | 1981.39  | 2006.19  | 0.05    |        | 1887.63  | 1387.95  | -1.02   |        | 31.36   | 22.69   | -1.08   |        |
| Haiti         | (197.99, | (198.42, | (-0.07, | 0.002  | (1955.10 | (1988.61 | (0.02,  | 0.002  | (1861.46 | (1373.10 | (-1.25, | <0.001 | (28.05, | (20.81, | (-1.33, | <0.001 |

|                               |          |          |         |         |           |           |         |         |           |           |         |         |         |         |         |         |
|-------------------------------|----------|----------|---------|---------|-----------|-----------|---------|---------|-----------|-----------|---------|---------|---------|---------|---------|---------|
|                               | 215.14)  | 209.71)  | -0.02)  |         | ,         | ,         | 0.08)   |         | ,         | ,         | -0.78)  | 34.97)  | 24.68)  | -0.83)  |         |         |
|                               |          |          |         |         | 2007.96)  | 2023.90)  |         |         | 1914.08)  | 1402.92)  |         |         |         |         |         |         |
|                               |          |          |         |         | 1666.79)  | 1725.80)  |         |         | 1257.05)  |           |         |         |         |         |         |         |
|                               | 139.12)  | 138.29)  | -0.02)  |         |           |           | 0.13)   |         |           | 581.25)   | -2.66)  | 20.31)  | 8.51)   | -3.00)  |         |         |
| Honduras                      | (131.00, | (133.09, | (-0.04, | 0.110)  | (1638.25, | (1707.23, | (0.09,  | <0.001) | (1231.38, | (570.16,  | (-2.88, | <0.001) | (17.14, | (7.20,  | (-3.24, | <0.001) |
|                               | 147.65)  | 143.65)  | 0.00)   |         | ,         | ,         | 0.17)   |         | ,         | 592.52)   | -2.44)  | 23.93)  | 10.01)  | -2.75)  |         |         |
|                               |          |          |         |         | 1695.73)  | 1744.53)  |         |         | 1283.13)  |           |         |         |         |         |         |         |
|                               |          |          |         |         |           |           |         |         | 2228.47)  |           |         |         |         |         |         |         |
|                               | 129.21)  | 115.41)  | -0.40)  |         | 923.99)   | 875.11)   | -0.19)  |         |           | 698.38)   | -3.94)  | 38.87)  | 11.33)  | -4.19)  |         |         |
| Hungary                       | (124.23, | (110.12, | (-0.42, | <0.001) | (910.65,  | (860.52,  | (-0.25, | <0.001) | (2208.13, | (685.56,  | (-4.46, | <0.001) | (36.24, | (9.76,  | (-4.75, | <0.001) |
|                               | 134.34)  | 120.91)  | -0.38)  |         | 937.50)   | 889.91)   | -0.12)  |         | ,         | 711.42)   | -3.42)  | 41.65)  | 13.10)  | -3.62)  |         |         |
|                               |          |          |         |         |           |           |         |         | 2248.96)  |           |         |         |         |         |         |         |
|                               | 90.43)   | 84.92)   | -0.21)  |         | 494.89)   | 470.65)   | -0.16)  |         | 637.15)   | 276.15)   | -2.89)  | 10.21)  | 4.17)   | -3.12)  |         |         |
| Iceland                       | (66.82,  | (63.95,  | (-0.23, | <0.001) | (437.21,  | (419.33,  | (-0.27, | 0.004)  | (571.34,  | (237.33,  | (-3.29, | <0.001) | (3.53,  | (0.78,  | (-3.68, | <0.001) |
|                               | 119.89)  | 111.20)  | -0.20)  |         | 558.25)   | 527.07)   | -0.05)  |         | 708.64)   | 320.10)   | -2.49)  | 23.31)  | 13.93)  | -2.56)  |         |         |
|                               |          |          |         |         | 1360.61)  | 1382.67)  | 0.10)   |         | 1852.16)  | 1537.53)  | -0.59)  | 30.71)  | 25.54)  | -0.57)  |         |         |
| India                         | (134.62, | (136.52, | (-0.02, | 0.135)  | (1358.85, | (1381.35, | (-0.06, | 0.211)  | (1850.08, | (1536.12, | (-1.23, | 0.072)  | (30.44, | (25.36, | (-1.28, | 0.119)  |
|                               | 135.72)  | 137.35)  | 0.12)   |         | ,         | ,         | 0.26)   |         | ,         | ,         | 0.05)   | 30.98)  | 25.73)  | 0.15)   |         |         |
|                               |          |          |         |         | 1362.36)  | 1384.00)  |         |         | 1854.24)  | 1538.93)  |         |         |         |         |         |         |
|                               | 102.28)  | 108.57)  | 0.21)   |         | 944.37)   | 1008.62)  | 0.25)   |         | 1648.54)  | 1436.37)  | -0.48)  | 26.83)  | 23.01)  | -0.55)  |         |         |
| Indonesia                     | (101.23, | (107.69, | (0.20,  | <0.001) | (941.20,  | (1005.95, | (0.16,  | <0.001) | (1644.30, | (1433.19, | (-0.69, | <0.001) | (26.29, | (22.61, | (-0.69, | <0.001) |
|                               | 103.33)  | 109.45)  | 0.22)   |         | 947.55)   | ,         | 0.33)   |         | ,         | ,         | -0.27)  | 27.38)  | 23.42)  | -0.40)  |         |         |
|                               |          |          |         |         |           | 1011.29)  |         |         | 1652.78)  | 1439.55)  |         |         |         |         |         |         |
|                               | 166.92)  | 165.61)  | -0.03)  |         | 1869.58)  | 1934.80)  | 0.12)   |         | 1471.62)  | 1043.25)  | -1.18)  | 23.57)  | 15.80)  | -1.38)  |         |         |
| Iran (Islamic<br>Republic of) | (164.41, | (163.76, | (-0.08, | 0.291)  | (1861.23, | (1928.41, | (0.10,  | <0.001) | (1464.01, | (1038.62, | (-1.29, | <0.001) | (22.60, | (15.24, | (-1.50, | <0.001) |
|                               | 169.46)  | 167.47)  | 0.02)   |         | ,         | ,         | 0.15)   |         | ,         | ,         | -1.07)  | 24.57)  | 16.37)  | -1.26)  |         |         |
|                               |          |          |         |         | 1877.96)  | 1941.21)  |         |         | 1479.25)  | 1047.90)  |         |         |         |         |         |         |
|                               | 164.80)  | 165.10)  | 0.00)   |         | 1806.67)  | 1834.89)  | 0.06)   |         | 1838.72)  | 1193.82)  | -1.46)  | 29.87)  | 18.36)  | -1.64)  |         |         |
| Iraq                          | (160.25, | (162.46, | (-0.01, | 0.769)  | (1791.51, | (1826.04, | (-0.02, | 0.139)  | (1823.11, | (1186.60, | (-1.58, | <0.001) | (27.89, | (17.47, | (-1.77, | <0.001) |
|                               | 169.45)  | 167.78)  | 0.02)   |         | ,         | ,         | 0.15)   |         | ,         | ,         | -1.34)  | 31.96)  | 19.30)  | -1.51)  |         |         |
|                               |          |          |         |         | 1821.93)  | 1843.78)  |         |         | 1854.42)  | 1201.08)  |         |         |         |         |         |         |
|                               | 88.71)   | 78.43)   | -0.43)  |         | 568.32)   | 522.20)   | -0.28)  |         | 673.56)   | 270.92)   | -3.15)  | 11.11)  | 4.02)   | -3.51)  |         |         |
| Ireland                       | (81.71,  | (72.51,  | (-0.45, | <0.001) | (550.43,  | (506.79,  | (-0.36, | <0.001) | (654.03,  | (259.96,  | (-3.80, | <0.001) | (8.73,  | (2.80,  | (-4.24, | <0.001) |
|                               | 96.15)   | 84.72)   | -0.41)  |         | 586.66)   | 537.99)   | -0.19)  |         | 693.52)   | 282.25)   | -2.50)  | 13.96)  | 5.63)   | -2.77)  |         |         |
|                               |          |          |         |         |           |           |         |         |           |           |         |         |         |         |         |         |
| Israel                        | 76.79)   | 71.69)   | -0.24)  | <0.001) | 480.13)   | 471.56)   | -0.03)  | 0.669)  | 683.89)   | 233.47)   | -3.92)  | <0.001) | 11.16)  | 3.36)   | -4.13)  | <0.001) |

|            |          |          |         |        |          |          |         |        |          |          |         |        |         |         |         |        |
|------------|----------|----------|---------|--------|----------|----------|---------|--------|----------|----------|---------|--------|---------|---------|---------|--------|
|            | (71.25,  | (67.66,  | (-0.26, |        | (466.15, | (461.14, | (-0.16, |        | (667.14, | (226.16, | (-4.35, |        | (9.11,  | (2.54,  | (-4.82, |        |
|            | 82.66)   | 75.90)   | -0.21)  |        | 494.44)  | 482.15)  | 0.11)   |        | 700.97)  | 240.95)  | -3.50)  |        | 13.55)  | 4.37)   | -3.43)  |        |
|            | 127.57   | 119.78   | -0.22   |        | 839.05   | 848.56   | 0.04    |        | 683.24   | 326.86   | -2.57   |        | 11.08   | 4.93    | -2.80   |        |
| Italy      | (125.45, | (117.48, | (-0.25, | <0.001 | (833.58, | (842.47, | (-0.04, | 0.328  | (678.30, | (323.09, | (-2.88, | <0.001 | (10.46, | (4.48,  | (-3.36, | <0.001 |
|            | 129.73)  | 122.11)  | -0.19)  |        | 844.56)  | 854.68)  | 0.12)   |        | 688.21)  | 330.67)  | -2.25)  |        | 11.73)  | 5.42)   | -2.25)  |        |
|            |          |          |         |        | 1957.79  | 2116.19  |         |        |          |          |         |        |         |         |         |        |
|            | 164.78   | 182.49   | 0.36    |        | (1916.61 | (2078.91 | 0.28    |        | 700.00   | 655.56   | -0.30   |        | 10.22   | 9.60    | -0.29   |        |
| Jamaica    | (153.00, | (171.66, | (0.33,  | <0.001 | '        | '        | (0.26,  | <0.001 | (675.22, | (634.66, | (-1.84, | 0.710  | (7.39,  | (7.20,  | (-2.22, | 0.768  |
|            | 177.28)  | 193.85)  | 0.38)   |        | 1999.69) | 2154.00) | 0.30)   |        | 725.52)  | 676.99)  | 1.27)   |        | 13.84)  | 12.55)  | 1.67)   |        |
|            |          |          |         |        |          | 1060.36  |         |        |          |          |         |        |         |         |         |        |
|            | 135.36   | 143.50   | 0.21    |        | 957.31   | (1055.63 | 0.36    |        | 574.69   | 381.12   | -1.40   |        | 9.02    | 5.55    | -1.67   |        |
| Japan      | (133.85, | (141.75, | (0.18,  | <0.001 | (953.32, | '        | (0.29,  | <0.001 | (571.60, | (378.28, | (-1.65, | <0.001 | (8.64,  | (5.21,  | (-1.96, | <0.001 |
|            | 136.88)  | 145.27)  | 0.23)   |        | 961.31)  | 1065.10) | 0.43)   |        | 577.79)  | 383.97)  | -1.15)  |        | 9.42)   | 5.90)   | -1.38)  |        |
|            |          |          |         |        | 1145.54  | 1111.43  | -0.08   |        | 1013.92  | 586.69   | -1.81   |        | 16.26   | 8.72    | -2.06   |        |
|            | 107.84   | 100.57   | -0.24   |        | (1119.33 | (1098.80 | -0.24,  | 0.303  | (988.38, | (577.47, | (-2.19, | <0.001 | (13.12, | (7.62,  | (-2.50, | <0.001 |
| Jordan     | (99.82,  | (96.79,  | (-0.28, | <0.001 | '        | '        | 0.07)   |        | 1039.99) | 596.03)  | -1.43)  |        | 19.97)  | 9.93)   | -1.62)  |        |
|            | 116.38)  | 104.47)  | -0.20)  |        | 1172.27) | 1124.17) |         |        |          |          |         |        |         |         |         |        |
|            |          |          |         |        |          |          |         |        | 2211.15  | 1928.43  | -0.48   |        | 38.01   | 33.30   | -0.45   |        |
|            | 135.48   | 117.83   | -0.48   |        | 865.99   | 813.26   | -0.22   |        | (2195.24 | (1914.33 | -1.51,  | 0.374  | (35.94, | (31.47, | (-1.53, | 0.412  |
| Kazakhstan | (131.58, | (114.33, | (-0.51, | <0.001 | (856.06, | (803.95, | (-0.27, | <0.001 | '        | '        | 0.57)   |        | 40.16)  | 35.21)  | 0.63)   |        |
|            | 139.48)  | 121.42)  | -0.45)  |        | 876.01)  | 822.65)  | -0.17)  |        | 2227.15) | 1942.62) |         |        |         |         |         |        |
|            |          |          |         |        | 2612.00  | 2745.08  | 0.18    |        | 866.23   | 959.22   | 0.34    |        | 12.13   | 13.59   | 0.36    |        |
|            | 179.15   | 177.92   | -0.01   |        | (2595.93 | (2734.93 | (0.16,  | <0.001 | (856.66, | (953.08, | (0.16,  | <0.001 | (11.00, | (12.86, | (0.17,  | <0.001 |
| Kenya      | (175.00, | (175.36, | (-0.04, | 0.308  | '        | '        | 0.20)   |        | 875.89)  | 965.39)  | 0.51)   |        | 13.35)  | 14.35)  | 0.55)   |        |
|            | 183.39)  | 180.52)  | 0.01)   |        | 2628.16) | 2755.26) |         |        |          |          |         |        |         |         |         |        |
|            |          |          |         |        | 2096.22  | 1998.61  | -0.17   |        | 8803.13  | 7889.23  | -0.38   |        | 150.93  | 134.93  | -0.39   |        |
|            | 300.48   | 247.48   | -0.67   |        | (1860.29 | (1820.22 | (-0.21, | <0.001 | (8304.10 | (7527.28 | (-0.46, | <0.001 | (91.70, | (91.21, | (-0.47, | <0.001 |
| Kiribati   | (214.77, | (187.28, | (-0.72, | <0.001 | '        | '        | -0.14)  |        | '        | '        | -0.30)  |        | 235.58) | 192.76) | -0.31)  |        |
|            | 410.63)  | 321.39)  | -0.62)  |        | 2355.33) | 2190.23) |         |        | 9325.50) | 8264.47) |         |        |         |         |         |        |
|            |          |          |         |        |          |          |         |        | 1145.08  | 990.69   | -0.51   |        | 18.34   | 15.89   | -0.50   |        |
|            | 96.40    | 101.96   | 0.21    |        | 914.39   | 950.96   | 0.15    |        | (1116.19 | (972.68, | (-2.15, | 0.546  | (14.89, | (13.73, | (-2.28, | 0.590  |
| Kuwait     | (88.26,  | (96.20,  | (0.13,  | <0.001 | (888.79, | (933.06, | (0.09,  | <0.001 | '        | '        | 1.16)   |        | 22.55)  | 18.41)  | 1.32)   |        |
|            | 105.25)  | 108.08)  | 0.29)   |        | 940.69)  | 969.21)  | 0.21)   |        | 1174.67) | 1009.04) |         |        |         |         |         |        |

|              |          |          |         |        |          |          |         |        |          |          |         |        |         |         |         |        |
|--------------|----------|----------|---------|--------|----------|----------|---------|--------|----------|----------|---------|--------|---------|---------|---------|--------|
|              | 182.86   | 164.02   | -0.37   |        | 1741.49  | 1646.66  | -0.19   |        | 2216.26  | 1433.86  | -1.44   |        | 37.20   | 23.85   | -1.48   |        |
| Kyrgyzstan   | (173.93, | (157.16, | (-0.39, | <0.001 | (1713.76 | (1624.82 | (-0.23, | <0.001 | (2184.21 | (1413.23 | (-2.58, | 0.014  | (33.12, | (21.24, | (-2.71, | 0.020  |
|              | 192.15)  | 171.10)  | -0.35)  |        | ,        | ,        | -0.15)  |        | ,        | ,        | -0.29)  |        | 41.66)  | 26.69)  | -0.23)  |        |
|              |          |          |         |        | 1769.57) | 1668.73) |         |        | 2248.67) | 1454.74) |         |        |         |         |         |        |
| Lao People's | 174.82   | 148.11   | -0.58   |        | 1509.43  | 1408.50  | -0.21   |        | 1800.38  | 1658.30  | -0.24   |        | 29.06   | 26.70   | -0.25   |        |
| Democratic   | (165.01, | (142.11, | (-0.62, | <0.001 | (1480.40 | (1389.89 | (-0.34, | 0.002  | (1768.07 | (1637.93 | (-0.44, | 0.013  | (25.05, | (24.16, | (-0.46, | 0.014  |
| Republic     | 185.09)  | 154.31)  | -0.54)  |        | ,        | ,        | -0.08)  |        | ,        | ,        | -0.05)  |        | 33.55)  | 29.44)  | -0.05)  |        |
|              |          |          |         |        | 1538.91) | 1427.31) |         |        | 1833.16) | 1678.87) |         |        |         |         |         |        |
|              |          |          |         |        |          |          |         |        | 2229.45  | 1546.55  | -1.23   |        | 39.06   | 26.84   | -1.25   |        |
| Latvia       | (112.17, | (114.40, | (0.12,  | <0.001 | (609.40, | (672.27, | (0.21,  | <0.001 | (2188.16 | (1504.66 | (-2.80, | 0.132  | (33.76, | (21.61, | (-2.89, | 0.144  |
|              | 131.87)  | 139.93)  | 0.18)   |        | 653.80)  | 730.05)  | 0.60)   |        | ,        | ,        | 0.37)   |        | 44.98)  | 33.20)  | 0.43)   |        |
|              |          |          |         |        |          |          |         |        | 2271.36) | 1589.52) |         |        |         |         |         |        |
|              |          |          |         |        | 1263.35  | 1368.79  | 0.28    |        | 2321.25  | 1613.15  | -1.22   |        | 38.79   | 26.07   | -1.34   |        |
| Lebanon      | (86.61,  | (91.06,  | (0.06,  | <0.001 | (1233.51 | (1346.44 | (0.23,  | <0.001 | (2279.74 | (1589.10 | (-1.39, | <0.001 | (33.54, | (23.11, | (-1.52, | <0.001 |
|              | 103.64)  | 102.96)  | 0.10)   |        | ,        | ,        | 0.33)   |        | ,        | ,        | -1.05)  |        | 44.65)  | 29.34)  | -1.16)  |        |
|              |          |          |         |        | 1293.76) | 1391.46) |         |        | 2363.35) | 1637.50) |         |        |         |         |         |        |
|              |          |          |         |        | 2174.69  | 2283.40  | 0.17    |        | 871.53   | 1316.25  | 1.43    |        | 12.74   | 20.55   | 1.66    |        |
| Lesotho      | (165.37, | (189.47, | (0.39,  | <0.001 | (2123.25 | (2240.84 | (0.14,  | <0.001 | (838.19, | (1283.64 | (1.11,  | <0.001 | (8.95,  | (16.64, | (1.37,  | <0.001 |
|              | 195.44)  | 215.18)  | 0.42)   |        | ,        | ,        | 0.20)   |        | 905.92)  | ,        | 1.75)   |        | 17.67)  | 25.12)  | 1.95)   |        |
|              |          |          |         |        | 2227.15) | 2326.59) |         |        |          | 1349.49) |         |        |         |         |         |        |
|              |          |          |         |        | 2270.32  | 2444.67  | 0.26    |        | 1143.41  | 984.30   | -0.59   |        | 17.25   | 14.44   | -0.69   |        |
| Liberia      | (147.31, | (158.76, | (0.10,  | <0.001 | (2215.81 | (2413.03 | (0.24,  | <0.001 | (1104.67 | (963.81, | (-0.95, | 0.002  | (12.78, | (12.03, | (-1.10, | 0.001  |
|              | 176.97)  | 175.50)  | 0.12)   |        | ,        | ,        | 0.29)   |        | ,        | 1005.13) | -0.22)  |        | 22.84)  | 17.20)  | -0.28)  |        |
|              |          |          |         |        | 2325.90) | 2476.62) |         |        | 1183.22) |          |         |        |         |         |         |        |
|              |          |          |         |        | 1609.51  | 1829.36  | 0.45    |        | 1745.15  | 1501.39  | -0.53   |        | 27.88   | 23.68   | -0.57   |        |
| Libya        | (117.75, | (133.12, | (0.31,  | <0.001 | (1582.12 | (1808.41 | (0.36,  | <0.001 | (1716.37 | (1482.61 | (-1.29, | 0.171  | (24.31, | (21.38, | (-1.38, | 0.166  |
|              | 133.27)  | 144.75)  | 0.39)   |        | ,        | ,        | 0.53)   |        | ,        | ,        | 0.23)   |        | 31.84)  | 26.16)  | 0.24)   |        |
|              |          |          |         |        | 1637.29) | 1850.51) |         |        | 1774.31) | 1520.37) |         |        |         |         |         |        |
|              |          |          |         |        | 758.90   | 788.90   | 0.15    |        | 1767.39  | 1039.31  | -1.96   |        | 30.83   | 17.75   | -2.03   |        |
| Lithuania    | (121.10, | (119.44, | (-0.01, | 0.364  | (738.62, | (763.17, | (0.08,  | <0.001 | (1736.35 | (1010.11 | (-3.49, | 0.014  | (26.85, | (14.13, | (-3.63, | 0.015  |
|              | 138.08)  | 140.79)  | 0.02)   |        | 779.62)  | 815.37)  | 0.22)   |        | ,        | ,        | -0.40)  |        | 35.26)  | 22.14)  | -0.39)  |        |
|              |          |          |         |        |          |          |         |        | 1798.86) | 1069.25) |         |        |         |         |         |        |
| Luxembourg   | 77.95    | 71.24    | -0.31   | <0.001 | 626.94   | 620.64   | -0.01   | 0.883  | 849.08   | 307.05   | -3.41   | <0.001 | 13.80   | 4.48    | -3.77   | <0.001 |

|                  |          |          |         |        |          |          |         |        |          |          |         |        |         |         |         |        |
|------------------|----------|----------|---------|--------|----------|----------|---------|--------|----------|----------|---------|--------|---------|---------|---------|--------|
|                  | (59.69,  | (56.64,  | (-0.35, |        | (572.31, | (575.35, | (-0.15, |        | (785.62, | (276.06, | (-4.21, |        | (6.88,  | (1.53,  | (-4.65, |        |
|                  | 100.89)  | 88.98)   | -0.26)  |        | 686.07)  | 668.97)  | 0.13)   |        | 916.99)  | 341.05)  | -2.61)  |        | 25.91)  | 11.10)  | -2.89)  |        |
|                  |          |          |         |        | 2975.62  | 3068.07  |         |        | 3487.80  | 2344.25  |         |        |         |         |         |        |
|                  | 228.60   | 212.72   | -0.25   |        | (2952.29 | (3052.99 | 0.11    |        | (3461.81 | (2330.68 | -1.30   |        | 56.55   | 37.13   | -1.38   |        |
| Madagascar       | (222.15, | (208.76, | (-0.27, | <0.001 | ,        | ,        | (0.09,  | <0.001 | ,        | ,        | (-1.68, | <0.001 | (53.25, | (35.42, | (-1.78, | <0.001 |
|                  | 235.21)  | 216.74)  | -0.24)  |        | ,        | ,        | 0.14)   |        | ,        | ,        | -0.93)  |        | 60.01)  | 38.91)  | -0.97)  |        |
|                  |          |          |         |        | 2999.10) | 3083.21) |         |        | 3513.93) | 2357.88) |         |        |         |         |         |        |
|                  |          |          |         |        | 2708.79  | 2818.79  |         |        | 1240.83  | 1268.91  |         |        |         |         |         |        |
|                  | 194.20   | 199.09   | 0.09    |        | (2683.66 | (2800.93 | 0.15    |        | (1223.32 | (1256.56 | 0.12    |        | 18.53   | 18.94   | 0.11    |        |
| Malawi           | (187.58, | (194.42, | (0.08,  | <0.001 | ,        | ,        | (0.10,  | <0.001 | ,        | ,        | (-0.12, | 0.326  | (16.41, | (17.44, | (-0.13, | 0.356  |
|                  | 201.02)  | 203.85)  | 0.10)   |        | ,        | ,        | 0.20)   |        | ,        | ,        | 0.35)   |        | 20.86)  | 20.54)  | 0.35)   |        |
|                  |          |          |         |        | 1707.91  | 1664.38  |         |        | 1551.01  | 1366.11  |         |        |         |         |         |        |
|                  | 146.69   | 133.49   | -0.32   |        | (1694.43 | (1655.02 | -0.08   |        | (1538.05 | (1357.68 | -0.43   |        | 24.15   | 21.63   | -0.38   |        |
| Malaysia         | (142.76, | (130.85, | (-0.34, | <0.001 | ,        | ,        | (-0.14, | 0.003  | ,        | ,        | (-1.25, | 0.303  | (22.55, | (20.58, | (-1.28, | 0.416  |
|                  | 150.72)  | 136.17)  | -0.31)  |        | ,        | ,        | -0.03)  |        | ,        | ,        | 0.39)   |        | 25.84)  | 22.72)  | 0.54)   |        |
|                  |          |          |         |        | 1721.48) | 1673.79) |         |        | 1564.05) | 1374.59) |         |        |         |         |         |        |
|                  |          |          |         |        | 1640.57  | 1554.37  |         |        | 2154.23  |          |         |        |         |         |         |        |
|                  | 136.06   | 111.04   | -0.70   |        | (1508.74 | (1491.48 | -0.19   |        | (1994.80 | 820.67   | -3.29   |        | 35.60   | 12.02   | -3.70   |        |
| Maldives         | (99.67,  | (94.82,  | (-0.73, | <0.001 | ,        | ,        | (-0.22, | <0.001 | ,        | ,        | (-3.98, | <0.001 | (17.67, | (7.43,  | (-4.42, | <0.001 |
|                  | 182.79)  | 130.09)  | -0.67)  |        | ,        | ,        | -0.16)  |        | ,        | 866.50)  | -2.60)  |        | 65.12)  | 19.77)  | -2.97)  |        |
|                  |          |          |         |        | 1782.04) | 1619.94) |         |        | 2323.86) |          |         |        |         |         |         |        |
|                  |          |          |         |        | 2461.07  | 2514.53  |         |        | 979.53   | 902.07   | -0.26   |        | 14.13   | 12.83   | -0.31   |        |
|                  | 165.23   | 161.96   | -0.07   |        | (2434.40 | (2498.06 | 0.08    |        | (962.36, | (891.83, | (-0.56, | 0.084  | (12.11, | (11.61, | (-0.65, | 0.079  |
| Mali             | (158.36, | (157.79, | (-0.08, | <0.001 | ,        | ,        | (0.04,  | <0.001 | 996.94)  | 912.41)  | 0.04)   |        | 16.40)  | 14.15)  | 0.04)   |        |
|                  | 172.33)  | 166.22)  | -0.06)  |        | 2487.97) | 2531.09) | 0.12)   |        |          |          |         |        |         |         |         |        |
|                  |          |          |         |        | 502.10   | 460.21   | -0.29   |        | 649.44   | 413.97   | -1.59   |        | 10.39   | 6.49    | -1.65   |        |
| Malta            | 79.26)   | 72.25)   | -0.32)  | <0.001 | (452.16, | (413.23, | (-0.40, | <0.001 | (592.19, | (369.74, | (-2.30, | <0.001 | (4.38,  | (2.15,  | (-2.40, | <0.001 |
|                  | 102.88)  | 95.23)   | -0.31)  |        | 556.40)  | 511.96)  | -0.18)  |        | 711.06)  | 462.95)  | -0.86)  |        | 21.37)  | 16.85)  | -0.89)  |        |
|                  |          |          |         |        | 1626.37  | 1635.29  |         |        | 4529.22  | 5006.08  |         |        |         |         |         |        |
|                  | 179.98   | 176.43   | -0.07   |        | (1360.49 | (1416.72 | 0.02    |        | (4071.51 | (4617.96 | 0.36    |        | 75.11   | 85.90   | 0.51    |        |
| Marshall Islands | (99.07,  | (110.07, | (-0.08, | <0.001 | ,        | ,        | (-0.00, | 0.088  | ,        | ,        | (0.30,  | <0.001 | (27.14, | (42.15, | (0.45,  | <0.001 |
|                  | 303.11)  | 268.46)  | -0.06)  |        | ,        | ,        | 0.04)   |        | ,        | ,        | 0.42)   |        | 167.69) | 156.03) | 0.57)   |        |
|                  |          |          |         |        | 2544.60  | 2527.18  | -0.03   |        | 1252.77  | 707.51   | -1.90   |        | 18.79   | 9.53    | -2.24   |        |
|                  | 167.18   | 152.04   | -0.33   |        | (2492.25 | (2490.80 | (-0.05, | <0.001 | (1215.14 | (687.73, | (-2.02, | <0.001 | (14.39, | (7.33,  | (-2.38, | <0.001 |
| Mauritania       | (153.88, | (143.18, | (-0.34, | <0.001 | ,        | ,        | (-0.05, | <0.001 | ,        | ,        | (-2.02, | <0.001 | (14.39, | (7.33,  | (-2.38, | <0.001 |
|                  | 181.38)  | 161.34)  | -0.32)  |        | ,        | ,        | -0.02)  |        | ,        | 727.73)  | -1.78)  |        | 24.17)  | 12.22)  | -2.09)  |        |
|                  |          |          |         |        | 2597.84) | 2564.00) |         |        | 1291.31) |          |         |        |         |         |         |        |

|                   |          |          |         |        |          |          |         |        |          |          |         |        |         |         |         |        |
|-------------------|----------|----------|---------|--------|----------|----------|---------|--------|----------|----------|---------|--------|---------|---------|---------|--------|
|                   | 136.26   | 125.26   | -0.29   |        | 1543.60  | 1456.01  | -0.19   |        | 2224.11  | 1379.45  | -1.56   |        | 37.53   | 22.26   | -1.69   |        |
| Mauritius         | (122.21, | (111.52, | (-0.30, | <0.001 | (1495.51 | (1408.14 | (-0.24, | <0.001 | (2165.94 | (1333.52 | (-2.10, | <0.001 | (30.30, | (16.80, | (-2.29, | <0.001 |
|                   | 151.51)  | 140.29)  | -0.28)  |        | ,        | ,        | -0.14)  |        | ,        | ,        | -1.01)  |        | 46.00)  | 29.03)  | -1.10)  |        |
|                   |          |          |         |        | 1592.87) | 1505.13) |         |        | 2283.48) | 1426.63) |         |        |         |         |         |        |
|                   |          |          |         |        | 1150.61  | 1146.74  | -0.00   |        | 746.07   | 814.02   | 0.32    |        | 11.82   | 13.00   | 0.37    |        |
| Mexico            | (100.45, | (97.93,  | (-0.13, | <0.001 | (1145.35 | (1142.50 | (-0.04, | 0.971  | (741.70, | (810.44, | (-0.19, | 0.218  | (11.27, | (12.55, | (-0.16, | 0.173  |
|                   | 103.62)  | 100.43)  | -0.07)  |        | ,        | ,        | 0.04)   |        | 750.46)  | 817.61)  | 0.84)   |        | 12.39)  | 13.46)  | 0.90)   |        |
|                   |          |          |         |        | 1155.89) | 1150.98) |         |        |          |          |         |        |         |         |         |        |
|                   |          |          |         |        | 1652.04  | 1591.20  | -0.13   |        | 5684.63  | 5105.10  | -0.37   |        | 97.89   | 87.03   | -0.41   |        |
| Micronesia        | 191.54   | 170.48   | -0.40   |        | (1474.12 | (1423.27 | (-0.16, | <0.001 | (5342.43 | (4793.51 | (-0.45, | <0.001 | (57.57, | (50.57, | (-0.48, | <0.001 |
| (Federated States | (133.82, | (118.26, | (-0.44, | <0.001 | ,        | ,        | -0.10)  |        | ,        | ,        | -0.30)  |        | 156.18) | 140.29) | -0.34)  |        |
| of)               | 266.51)  | 238.77)  | -0.37)  |        | 1846.29) | 1774.31) |         |        | 6043.45) | 5432.16) |         |        |         |         |         |        |
|                   |          |          |         |        | 445.52   | 425.89   | -0.15   |        | 710.91   | 465.01   | -1.44   |        | 11.78   | 7.53    | -1.52   |        |
| Monaco            | (23.07,  | (21.44,  | (-0.16, | <0.001 | (279.59, | (261.81, | (-0.33, | 0.084  | (495.45, | (292.59, | (-1.49, | <0.001 | (0.03,  | (0.00,  | (-1.57, | <0.001 |
|                   | 239.89)  | 216.22)  | -0.05)  |        | 693.36)  | 658.39)  | 0.02)   |        | 1006.09) | 705.61)  | -1.40)  |        | 137.21) | 100.21) | -1.47)  |        |
|                   |          |          |         |        | 1814.29  | 1846.47  | 0.07    |        | 1902.36  | 2351.25  | 0.76    |        | 31.46   | 39.85   | 0.84    |        |
| Mongolia          | 193.84   | 192.10   | -0.03   | 0.009  | (1772.53 | (1814.41 | (0.04,  | <0.001 | (1857.50 | (2316.34 | (-0.05, | 0.065  | (25.85, | (35.44, | (-0.02, | 0.054  |
|                   | (180.30, | (181.88, | (-0.05, |        | ,        | ,        | 0.10)   |        | ,        | ,        | 1.58)   |        | 37.99)  | 44.72)  | 1.71)   |        |
|                   | 208.22)  | 202.80)  | -0.01)  |        | 1856.87) | 1879.01) |         |        | 1948.09) | 2386.63) |         |        |         |         |         |        |
|                   |          |          |         |        | 791.48   | 778.56   | -0.05   |        | 1695.21  | 846.24   | -3.04   |        | 28.80   | 13.93   | -3.16   |        |
| Montenegro        | (100.51, | (91.21,  | (-0.30, | <0.001 | (744.05, | (728.23, | (-0.11, | 0.142  | (1625.54 | (793.94, | (-5.04, | 0.004  | (20.37, | (7.99,  | (-5.16, | 0.003  |
|                   | 138.63)  | 131.03)  | -0.22)  |        | 841.20)  | 831.63)  | 0.02)   |        | ,        | 901.27)  | -0.99)  |        | 39.62)  | 22.83)  | -1.11)  |        |
|                   |          |          |         |        | 1840.62  | 1871.28  | 0.08    |        | 1771.28  | 1027.18  | -1.82   |        | 28.96   | 15.63   | -2.05   |        |
| Morocco           | 150.85   | 147.62   | -0.07   | <0.001 | (1828.50 | (1861.40 | (0.01,  | 0.036  | (1759.08 | (1019.87 | (-2.10, | <0.001 | (27.41, | (14.74, | (-2.55, | <0.001 |
|                   | (147.39, | (144.86, | (-0.09, |        | ,        | ,        | 0.16)   |        | ,        | ,        | -1.53)  |        | 30.59)  | 16.56)  | -1.55)  |        |
|                   | 154.38)  | 150.43)  | -0.05)  |        | 1852.81) | 1881.20) |         |        | 1783.55) | 1034.53) |         |        |         |         |         |        |
|                   |          |          |         |        | 2767.50  | 2913.30  | 0.19    |        | 1010.14  | 1472.52  | 1.34    |        | 14.65   | 22.54   | 1.54    |        |
| Mozambique        | 209.19   | 218.49   | 0.16    | <0.001 | (2744.12 | (2898.09 | (0.08,  | <0.001 | (995.75, | (1461.28 | (1.21,  | <0.001 | (12.95, | (21.14, | (1.38,  | <0.001 |
|                   | (202.86, | (214.36, | (0.13,  |        | ,        | ,        | 0.30)   |        | 1024.70) | ,        | 1.47)   |        | 16.53)  | 24.00)  | 1.69)   |        |
|                   | 215.68)  | 222.68)  | 0.18)   |        | 2791.04) | 2928.57) |         |        |          | 1483.82) |         |        |         |         |         |        |
|                   |          |          |         |        | 1391.87  | 1347.31  | -0.09   | 0.007  | 2752.79  | 1852.18  | -1.37   | <0.001 | 45.47   | 29.62   | -1.48   | <0.001 |
| Myanmar           | (153.52, | (134.83, | (-0.48, | <0.001 | (1383.66 | (1340.35 | (-0.16, |        | (2741.09 | (1843.99 | (-1.54, |        | (43.96, | (28.59, | (-1.64, |        |



|             |          |          |         |        |           |           |         |        |           |           |         |         |         |         |         |        |
|-------------|----------|----------|---------|--------|-----------|-----------|---------|--------|-----------|-----------|---------|---------|---------|---------|---------|--------|
|             | 159.08)  | 139.29)  | -0.43)  |        | ,         | ,         | -0.03)  |        | ,         | ,         | -1.20)  | 47.01)  | 30.67)  | -1.32)  |         |        |
|             |          |          |         |        | 1400.13)  | 1354.31)  |         |        | 2764.52)  | 1860.40)  |         |         |         |         |         |        |
|             |          |          |         |        | 2283.49)  | 2277.35)  |         |        |           |           |         |         |         |         |         |        |
|             | 177.40)  | 165.99)  | -0.23)  |        |           |           | -0.01)  |        | 887.07)   | 847.96)   | -0.11)  | 12.92)  | 12.35)  | -0.09)  |         |        |
| Namibia     | (161.22, | (154.77, | (-0.25, | <0.001 | (2224.24, | (2235.17, | (-0.04, | 0.568  | (848.99,  | (821.74,  | (-0.39, | 0.463   | (8.63,  | (9.34,  | (-0.42, | 0.610  |
|             | 194.92)  | 177.86)  | -0.21)  |        | ,         | ,         | 0.02)   |        | 926.53)   | 874.84)   | 0.18)   |         | 18.73)  | 16.06)  | 0.25)   |        |
|             |          |          |         |        | 2344.06)  | 2320.17)  |         |        |           |           |         |         |         |         |         |        |
|             | 158.18)  | 152.42)  | -0.12)  |        | 1126.44)  | 1094.17)  | -0.11)  |        | 6466.20)  | 6554.01)  | 0.05)   | 111.90) | 113.42) | 0.05)   |         |        |
| Nauru       | (33.21,  | (34.67,  | (-0.21, | 0.004  | (704.31,  | (699.53,  | (-0.16, | <0.001 | (5375.32, | (5512.65, | (-0.10, | 0.505   | (14.80, | (17.87, | (-0.10, | 0.517  |
|             | 468.39)  | 435.52)  | -0.04)  |        | 1715.30)  | 1637.55)  | -0.06)  |        | ,         | ,         | 0.20)   | 399.80) | 378.96) | 0.20)   |         |        |
|             |          |          |         |        |           |           |         |        | 7717.97)  | 7739.28)  |         |         |         |         |         |        |
|             | 133.57)  | 124.45)  | -0.24)  |        | 1208.27)  | 1186.50)  | -0.06)  |        | 1428.89)  | 1078.04)  | -0.95)  | 23.42)  | 17.17)  | -1.03)  |         |        |
| Nepal       | (129.69, | (121.54, | (-0.26, | <0.001 | (1196.41, | (1177.37, | (-0.14, | 0.128  | (1415.85, | (1069.26, | (-1.21, | <0.001  | (21.76, | (16.07, | (-1.22, | <0.001 |
|             | 137.53)  | 127.40)  | -0.21)  |        | ,         | ,         | 0.02)   |        | ,         | ,         | -0.70)  | 25.17)  | 18.33)  | -0.85)  |         |        |
|             |          |          |         |        | 1220.21)  | 1195.69)  |         |        | 1442.03)  | 1086.89)  |         |         |         |         |         |        |
|             | 108.54)  | 98.84)   | -0.32)  |        | 576.57)   | 574.61)   | -0.02)  |        | 578.41)   | 231.66)   | -3.16)  | 9.49)   | 3.32)   | -3.63)  |         |        |
| Netherlands | (104.94, | (95.15,  | (-0.34, | <0.001 | (568.26,  | (565.67,  | (-0.07, | 0.274  | (570.09,  | (226.01,  | (-3.41, | <0.001  | (8.45,  | (2.68,  | (-3.89, | <0.001 |
|             | 112.23)  | 102.64)  | -0.31)  |        | 584.98)   | 583.65)   | 0.02)   |        | 586.83)   | 237.43)   | -2.91)  |         | 10.62)  | 4.08)   | -3.37)  |        |
|             | 122.49)  | 114.47)  | -0.21)  |        | 573.17)   | 582.86)   | 0.08)   |        | 843.33)   | 412.12)   | -2.40)  |         | 14.10)  | 6.60)   | -2.58)  |        |
| New Zealand | (114.36, | (106.66, | (-0.29, | <0.001 | (555.43,  | (565.09,  | (-0.13, | 0.452  | (821.79,  | (397.19,  | (-2.84, | <0.001  | (11.44, | (4.84,  | (-3.11, | <0.001 |
|             | 131.05)  | 122.70)  | -0.13)  |        | 591.33)   | 601.05)   | 0.29)   |        | 865.30)   | 427.47)   | -1.96)  |         | 17.20)  | 8.81)   | -2.04)  |        |
|             |          |          |         |        | 1759.28)  | 1827.64)  | 0.13)   |        | 660.70)   | 494.06)   | -1.24)  | 9.86)   | 6.65)   | -1.55)  |         |        |
| Nicaragua   | (130.69, | (132.81, | (-0.03, | 0.056  | (1726.97, | (1805.18, | (0.07,  | <0.001 | (640.18,  | (482.37,  | (-1.92, | <0.001  | (7.46,  | (5.35,  | (-2.19, | <0.001 |
|             | 149.07)  | 145.30)  | 0.00)   |        | ,         | ,         | 0.19)   |        | 681.75)   | 505.97)   | -0.55)  |         | 12.82)  | 8.18)   | -0.90)  |        |
|             |          |          |         |        | 1792.10)  | 1850.32)  |         |        |           |           |         |         |         |         |         |        |
|             | 157.22)  | 158.26)  | 0.02)   |        | 2360.82)  | 2478.86)  | 0.18)   |        | 1156.79)  | 1028.09)  | -0.38)  | 17.34)  | 15.15)  | -0.42)  |         |        |
| Niger       | (150.30, | (154.14, | (0.02,  | <0.001 | (2334.00, | (2462.67, | (0.11,  | <0.001 | (1137.46, | (1017.15, | (-0.66, | 0.007   | (15.01, | (13.82, | (-0.76, | 0.015  |
|             | 164.40)  | 162.47)  | 0.03)   |        | ,         | ,         | 0.25)   |        | ,         | ,         | -0.11)  | 19.94)  | 16.57)  | -0.08)  |         |        |
|             |          |          |         |        | 2387.89)  | 2495.13)  |         |        | 1176.39)  | 1039.13)  |         |         |         |         |         |        |
|             | 147.56)  | 151.88)  | 0.10)   |        | 2604.12)  | 2837.26)  | 0.30)   |        | 997.38)   | 841.07)   | -0.60)  | 14.54)  | 11.66)  | -0.78)  |         |        |
| Nigeria     | (145.70, | (150.63, | (0.09,  | <0.001 | (2596.33, | (2831.87, | (0.28,  | <0.001 | (992.43,  | (838.01,  | (-0.83, | <0.001  | (13.94, | (11.29, | (-1.05, | <0.001 |
|             | 149.44)  | 153.15)  | 0.12)   |        | ,         | ,         | 0.32)   |        | 1002.35)  | 844.14)   | -0.37)  |         | 15.16)  | 12.03)  | -0.52)  |        |
|             |          |          |         |        | 2611.93)  | 2842.66)  |         |        |           |           |         |         |         |         |         |        |
| Niue        | 123.99)  | 112.89)  | -0.33)  | <0.001 | 1014.38)  | 1002.84)  | -0.04)  | 0.152  | 3735.84)  | 2570.04)  | -1.30)  | <0.001  | 63.75)  | 42.65)  | -1.39)  | <0.001 |

|                          |          |          |         |        |          |          |         |        |          |          |         |        |         |         |         |        |
|--------------------------|----------|----------|---------|--------|----------|----------|---------|--------|----------|----------|---------|--------|---------|---------|---------|--------|
|                          | (0.09,   | (0.00,   | (-0.34, |        | (273.04, | (191.94, | (-0.09, |        | (2049.05 | (1043.32 | (-1.58, |        | (0.00,  | (0.00,  | (-1.68, |        |
|                          | 1266.09  | 1680.82  | -0.31)  |        | 2660.11) | 3120.35) | 0.01)   |        | ,        | ,        | -1.02)  |        | 1156.89 | 1549.40 | -1.11)  |        |
|                          | )        | )        |         |        |          |          |         |        | 6277.39) | 5331.45) |         |        | )       | )       |         |        |
|                          | 103.96   | 103.08   | -0.03   |        | 748.91   | 766.91   | 0.09    |        | 1362.01  | 925.76   | -1.20   |        | 22.74   | 15.08   | -1.26   |        |
| North Macedonia          | (94.43,  | (93.70,  | (-0.04, | <0.001 | (722.97, | (741.04, | (-0.03, | 0.122  | (1326.95 | (897.37, | (-2.36, | 0.045  | (18.41, | (11.68, | (-2.52, | 0.054  |
|                          | 114.19)  | 113.26)  | -0.02)  |        | 775.55)  | 793.57)  | 0.21)   |        | 1397.76) | 954.94)  | -0.03)  |        | 27.79)  | 19.31)  | 0.02)   |        |
|                          | 132.54   | 133.06   | 0.02    |        | 1659.59  | 1731.87  | 0.15    |        | 2005.19  | 1683.99  | -0.62   |        | 32.87   | 27.05   | -0.68   |        |
| Northern Mariana Islands | (75.78,  | (58.21,  | (0.00,  | 0.039  | (1434.53 | (1424.63 | (0.12,  | <0.001 | (1766.11 | (1367.50 | (-0.83, | <0.001 | (9.38,  | (2.06,  | (-0.85, | <0.001 |
|                          | 220.80)  | 270.08)  | 0.03)   |        | ,        | ,        | 0.18)   |        | ,        | ,        | -0.41)  |        | 90.97)  | 124.66) | -0.52)  |        |
|                          | 122.45   | 112.81   | -0.28   |        | 844.89   | 809.35   | -0.13   |        | 645.89   | 224.02   | -3.58   |        | 10.45   | 3.00    | -4.16   |        |
| Norway                   | (115.08, | (106.14, | (-0.32, | <0.001 | (825.39, | (791.41, | (-0.17, | <0.001 | (628.89, | (214.65, | (-4.03, | <0.001 | (8.39,  | (2.01,  | (-4.71, | <0.001 |
|                          | 130.18)  | 119.82)  | -0.24)  |        | 864.75)  | 827.63)  | -0.09)  |        | 663.25)  | 233.73)  | -3.12)  |        | 12.88)  | 4.34)   | -3.61)  |        |
|                          | 92.84    | 95.11    | 0.09    |        | 1069.68  | 1208.27  | 0.44    |        | 1462.34  | 795.33   | -2.09   |        | 23.78   | 11.85   | -2.36   |        |
| Oman                     | (84.85,  | (90.55,  | (0.02,  | 0.019  | (1041.70 | (1190.31 | (0.33,  | <0.001 | (1429.79 | (780.71, | (-2.34, | <0.001 | (19.81, | (10.18, | (-2.71, | <0.001 |
|                          | 101.45)  | 99.95)   | 0.16)   |        | ,        | ,        | 0.54)   |        | ,        | 810.25)  | -1.83)  |        | 28.39)  | 13.85)  | -2.01)  |        |
|                          | 159.05   | 165.30   | 0.14    |        | 1607.42  | 1678.22  | 0.16    |        | 1741.13  | 2509.48  | 1.31    |        | 28.45   | 41.62   | 1.36    |        |
| Pakistan                 | (157.30, | (164.10, | (0.13,  | <0.001 | (1601.76 | (1674.35 | (0.10,  | <0.001 | (1735.08 | (2504.65 | (1.11,  | <0.001 | (27.68, | (41.00, | (1.16,  | <0.001 |
|                          | 160.82)  | 166.51)  | 0.15)   |        | ,        | ,        | 0.23)   |        | ,        | ,        | 1.51)   |        | 29.25)  | 42.25)  | 1.56)   |        |
|                          | 133.03   | 128.28   | -0.13   |        | 1340.71  | 1353.96  | 0.04    |        | 3867.26  | 3559.20  | -0.29   |        | 65.67   | 60.31   | -0.24   |        |
| Palau                    | (40.96,  | (41.18,  | (-0.14, | <0.001 | (987.24, | (1002.19 | (0.00,  | 0.032  | (3240.11 | (2993.80 | (-0.39, | <0.001 | (9.52,  | (9.59,  | (-0.65, | 0.247  |
|                          | 324.72)  | 320.92)  | -0.12)  |        | 1783.51) | 1799.75) | 0.08)   |        | ,        | ,        | -0.19)  |        | 226.86) | 222.82) | 0.17)   |        |
|                          | 136.14   | 132.89   | -0.09   |        | 1578.04  | 1603.37  | 0.07    |        | 1243.13  | 780.52   | -1.65   |        | 19.93   | 11.82   | -1.85   |        |
| Palestine                | (123.82, | (125.76, | (-0.14, | 0.002  | (1535.25 | (1578.35 | (-0.01, | 0.082  | (1203.46 | (762.61, | (-2.13, | <0.001 | (15.11, | (9.68,  | (-2.43, | <0.001 |
|                          | 149.51)  | 140.34)  | -0.03)  |        | ,        | ,        | 0.15)   |        | ,        | 798.76)  | -1.17)  |        | 25.90)  | 14.31)  | -1.27)  |        |
|                          | 130.19   | 126.83   | -0.09   |        | 1621.85) | 1628.72) |         |        | 1283.87) |          |         |        |         |         |         |        |
| Panama                   | (120.28, | (119.17, | (-0.10, | <0.001 | (1594.08 | (1616.24 | (0.01,  | 0.015  | (796.20, | (575.98, | (-1.65, | 0.001  | (9.59,  | (6.78,  | (-1.87, | 0.001  |
|                          | 140.75)  | 134.85)  | -0.08)  |        | ,        | ,        | 0.06)   |        | 848.46)  | 609.90)  | -0.45)  |        | 16.38)  | 11.02)  | -0.51)  |        |

|                   |          |          |         |        |          |          |         |        |          |          |         |        |         |         |         |        |
|-------------------|----------|----------|---------|--------|----------|----------|---------|--------|----------|----------|---------|--------|---------|---------|---------|--------|
|                   |          |          |         |        | 1666.15) | 1672.40) |         |        |          |          |         |        |         |         |         |        |
|                   |          |          |         |        | 1496.38  | 1546.01  |         |        | 2763.71  | 2910.33  |         |        |         |         |         |        |
|                   | 167.39   | 168.60   | 0.03    |        |          |          | 0.11    |        |          |          | 0.11    |        | 45.94   | 48.38   | 0.10    |        |
| Papua New Guinea  | (158.37, | (162.92, | (0.02,  | <0.001 | (1469.37 | (1528.78 | (0.09,  | <0.001 | (2726.13 | (2886.36 | (-0.06, | 0.213  | (41.17, | (45.31, | (-0.07, | 0.230  |
|                   | 176.82)  | 174.44)  | 0.03)   |        | ,        | ,        | 0.13)   |        | ,        | ,        | 0.28)   |        | 51.14)  | 51.60)  | 0.28)   |        |
|                   |          |          |         |        | 1523.79) | 1563.38) |         |        | 2801.70) | 2934.45) |         |        |         |         |         |        |
|                   |          |          |         |        | 1901.88  | 1930.29  |         |        | 858.67   | 731.19   | -0.41   |        | 13.25   | 10.88   | -0.47   |        |
| Paraguay          | 136.21   | 134.77   | -0.03   |        | (1871.00 | (1908.16 | 0.05    |        | (837.49, | (717.52, | (-1.21, | 0.316  | (10.72, | (9.26,  | (-1.21, | 0.219  |
|                   | (128.07, | (128.97, | (-0.05, | 0.007  | ,        | ,        | 0.07)   |        | 880.27)  | 745.06)  | 0.39)   |        | 16.22)  | 12.70)  | 0.28)   |        |
|                   | 144.76)  | 140.77)  | -0.01)  |        | 1933.17) | 1952.63) |         |        |          |          |         |        |         |         |         |        |
|                   |          |          |         |        | 1883.71  | 1939.90  |         |        | 1318.55  | 771.31   | -1.66   |        | 20.38   | 11.17   | -1.89   |        |
| Peru              | 128.27   | 121.41   | -0.20   |        | (1870.53 | (1929.50 | 0.10    |        | (1307.38 | (764.75, | (-2.33, | <0.001 | (19.00, | (10.39, | (-2.64, | <0.001 |
|                   | (124.86, | (118.82, | (-0.22, | <0.001 | ,        | ,        | 0.12)   |        | ,        | 777.92)  | -0.98)  |        | 21.85)  | 11.99)  | -1.13)  |        |
|                   | 131.75)  | 124.04)  | -0.17)  |        | 1896.96) | 1950.35) |         |        | 1329.80) |          |         |        |         |         |         |        |
|                   |          |          |         |        | 1250.92  | 1237.81  | -0.03   |        | 846.05   | 2178.96  | 3.41    |        | 12.79   | 36.25   | 3.76    |        |
| Philippines       | 157.50   | 146.03   | -0.26   |        | (1244.57 | (1233.26 | (-0.08, | 0.225  | (840.75, | (2172.87 | (2.69,  | <0.001 | (12.14, | (35.46, | (2.90,  | <0.001 |
|                   | (155.25, | (144.47, | (-0.27, | <0.001 | ,        | ,        | 0.02)   |        | 851.38)  | ,        | 4.14)   |        | 13.46)  | 37.04)  | 4.63)   |        |
|                   | 159.77)  | 147.61)  | -0.25)  |        | 1257.29) | 1242.38) |         |        |          | 2185.07) |         |        |         |         |         |        |
|                   |          |          |         |        | 840.11   | 792.29   | -0.19   |        | 1884.85  | 577.76   | -4.16   |        | 32.67   | 9.19    | -4.41   |        |
| Poland            | 99.53    | 88.08    | -0.41   |        | (833.63, | (785.52, | (-0.28, | <0.001 | (1875.46 | (572.30, | (-4.97, | <0.001 | (31.45, | (8.53,  | (-5.27, | <0.001 |
|                   | (97.32,  | (85.87,  | (-0.47, | <0.001 | 846.64)  | 799.11)  | -0.09)  |        | ,        | 583.27)  | -3.34)  |        | 33.93)  | 9.91)   | -3.54)  |        |
|                   | 101.77)  | 90.34)   | -0.34)  |        |          |          |         |        | 1894.29) |          |         |        |         |         |         |        |
|                   |          |          |         |        | 589.08   | 545.01   | -0.18   |        | 1017.98  | 339.35   | -3.86   |        | 16.80   | 5.19    | -4.01   |        |
| Portugal          | 73.66    | 60.72    | -0.67   |        | (578.10, | (533.48, | (-0.57, | 0.392  | (1003.50 | (330.47, | (-4.51, | <0.001 | (14.98, | (4.16,  | (-4.87, | <0.001 |
|                   | (69.81,  | (56.93,  | (-0.71, | <0.001 | 600.21)  | 556.72)  | 0.23)   |        | ,        | 348.42)  | -3.20)  |        | 18.78)  | 6.42)   | -3.15)  |        |
|                   | 77.68)   | 64.71)   | -0.63)  |        |          |          |         |        | 1032.62) |          |         |        |         |         |         |        |
|                   |          |          |         |        | 859.49   | 930.68   | 0.28    |        | 922.54   | 529.19   | -1.83   |        | 15.54   | 8.50    | -1.99   |        |
| Puerto Rico       | 113.80   | 126.07   | 0.36    |        | (837.29, | (905.51, | (0.20,  | <0.001 | (899.33, | (510.30, | (-2.72, | <0.001 | (12.65, | (6.27,  | (-2.97, | <0.001 |
|                   | (105.77, | (116.91, | (0.33,  | <0.001 | 882.15)  | 956.37)  | 0.37)   |        | 946.19)  | 548.61)  | -0.94)  |        | 18.90)  | 11.29)  | -1.01)  |        |
|                   | 122.27)  | 135.76)  | 0.40)   |        | 1121.09  | 1039.37  | -0.25   |        | 836.41   | 400.94   | -2.40   |        | 12.69   | 5.44    | -2.79   |        |
| Qatar             | 103.14   | 94.38    | -0.29   |        | (1071.20 | (1020.03 | (-0.29, | <0.001 | (791.89, | (388.84, | (-2.98, | <0.001 | (7.86,  | (4.16,  | (-3.58, | <0.001 |
|                   | (88.68,  | (88.90,  | (-0.34, | <0.001 | ,        | ,        | -0.22)  |        | 883.62)  | 413.58)  | -1.82)  |        | 20.78)  | 7.39)   | -1.99)  |        |
|                   | 120.33)  | 100.41)  | -0.24)  |        | 1173.57) | 1059.23) |         |        |          |          |         |        |         |         |         |        |
| Republic of Korea | 115.67   | 106.07   | -0.30   | <0.001 | 741.82   | 744.94   | 0.05    | 0.197  | 1480.95  | 287.89   | -5.51   | <0.001 | 24.30   | 4.17    | -5.92   | <0.001 |

|                                     |                               |                               |                            |        |                                      |                                      |                            |        |                                      |                                      |                            |                            |                            |                            |        |
|-------------------------------------|-------------------------------|-------------------------------|----------------------------|--------|--------------------------------------|--------------------------------------|----------------------------|--------|--------------------------------------|--------------------------------------|----------------------------|----------------------------|----------------------------|----------------------------|--------|
|                                     | (113.61,<br>117.75)           | (104.04,<br>108.14)           | (-0.34,<br>-0.25)          |        | (736.58,<br>747.09)                  | (739.62,<br>750.29)                  | (-0.03,<br>0.14)           |        | (1473.57<br>,<br>1488.36)            | (284.58,<br>291.23)                  | (-6.03,<br>-4.98)          | (23.36,<br>25.27)          | (3.79,<br>4.59)            | (-6.37,<br>-5.46)          |        |
| Republic of<br>Moldova              | 127.91<br>(120.62,<br>135.56) | 125.93<br>(117.92,<br>134.42) | -0.06<br>(-0.09,<br>-0.02) | 0.001  | 690.17<br>(673.20,<br>707.49)        | 697.98<br>(679.16,<br>717.27)        | 0.04<br>(-0.01,<br>0.08)   | 0.109  | 1382.99<br>(1358.85<br>,<br>1407.48) | 1052.09<br>(1029.29<br>,<br>1075.36) | -1.00<br>(-2.05,<br>0.06)  | 23.37<br>(20.34,<br>26.76) | 17.76<br>(14.93,<br>21.07) | -1.01<br>(-2.12,<br>0.11)  | 0.077  |
| Romania                             | 100.00<br>(97.07,<br>103.00)  | 107.87<br>(104.22,<br>111.62) | 0.26<br>(0.24,<br>0.28)    | <0.001 | 719.35<br>(711.47,<br>727.30)        | 822.24<br>(812.22,<br>832.35)        | 0.49<br>(0.40,<br>0.58)    | <0.001 | 1590.55<br>(1578.89<br>,<br>1602.27) | 941.87<br>(931.23,<br>952.62)        | -1.79<br>(-2.75,<br>-0.82) | 27.33<br>(25.83,<br>28.91) | 15.64<br>(14.31,<br>17.08) | -1.91<br>(-2.95,<br>-0.85) | <0.001 |
| Russian Federation                  | 135.36<br>(134.07,<br>136.65) | 145.94<br>(144.49,<br>147.40) | 0.26<br>(0.23,<br>0.30)    | <0.001 | 717.41<br>(714.45,<br>720.38)        | 785.00<br>(781.67,<br>788.35)        | 0.31<br>(0.30,<br>0.32)    | <0.001 | 2179.65<br>(2174.56<br>,<br>2184.76) | 2659.26<br>(2653.26<br>,<br>2665.26) | 0.90<br>(-0.16,<br>1.96)   | 37.96<br>(37.30,<br>38.64) | 46.60<br>(45.82,<br>47.40) | 0.62<br>(-0.71,<br>1.97)   | 0.365  |
| Rwanda                              | 212.11<br>(204.22,<br>220.25) | 172.69<br>(167.71,<br>177.78) | -0.70<br>(-0.75,<br>-0.65) | <0.001 | 2615.50<br>(2587.56<br>,<br>2643.69) | 2514.14<br>(2494.89<br>,<br>2533.51) | -0.12<br>(-0.21,<br>-0.03) | 0.007  | 1833.43<br>(1809.58<br>,<br>1857.53) | 979.51<br>(967.29,<br>991.86)        | -2.15<br>(-2.30,<br>-2.01) | 28.63<br>(25.69,<br>31.83) | 14.33<br>(12.87,<br>15.91) | -2.37<br>(-2.52,<br>-2.23) | <0.001 |
| Saint Kitts and<br>Nevis            | 130.37<br>(63.50,<br>239.98)  | 121.27<br>(66.77,<br>204.72)  | -0.25<br>(-0.28,<br>-0.23) | <0.001 | 995.71<br>(789.83,<br>1241.06)       | 980.65<br>(809.25,<br>1179.23)       | -0.04<br>(-0.13,<br>0.05)  | 0.389  | 1882.62<br>(1588.64<br>,<br>2216.64) | 715.82<br>(570.71,<br>888.26)        | -2.95<br>(-4.30,<br>-1.57) | 32.96<br>(5.51,<br>107.78) | 11.42<br>(0.65,<br>56.08)  | -3.27<br>(-5.02,<br>-1.47) | <0.001 |
| Saint Lucia                         | 195.89<br>(144.53,<br>261.17) | 196.47<br>(152.30,<br>249.79) | 0.01<br>(-0.01,<br>0.03)   | 0.441  | 2253.94<br>(2071.31<br>,<br>2449.72) | 2211.87<br>(2056.88<br>,<br>2375.72) | -0.06<br>(-0.09,<br>-0.03) | <0.001 | 1434.62<br>(1282.43<br>,<br>1600.81) | 960.35<br>(859.78,<br>1069.78)       | -1.43<br>(-2.31,<br>-0.54) | 23.37<br>(7.72,<br>55.42)  | 14.79<br>(4.90,<br>34.77)  | -1.64<br>(-2.68,<br>-0.60) | 0.002  |
| Saint Vincent and<br>the Grenadines | 182.30<br>(129.39,<br>251.86) | 186.97<br>(133.35,<br>255.32) | 0.09<br>(0.07,<br>0.11)    | <0.001 | 2294.85<br>(2096.63<br>,<br>2508.63) | 2333.96<br>(2132.96<br>,<br>2549.12) | 0.06<br>(0.03,<br>0.09)    | <0.001 | 1580.07<br>(1407.48<br>,<br>1769.28) | 1029.68<br>(897.41,<br>1176.26)      | -1.32<br>(-2.42,<br>-0.21) | 25.87<br>(8.21,<br>63.18)  | 15.93<br>(3.70,<br>44.65)  | -1.49<br>(-2.73,<br>-0.22) | 0.021  |
| Samoa                               | 161.23<br>(118.25,<br>112.29) | 148.17<br>(112.29,<br>112.29) | -0.29<br>(-0.30,<br>-0.30) | <0.001 | 1703.82<br>(1558.80<br>1553.52)      | 1679.11<br>(1553.52<br>1553.52)      | -0.04<br>(-0.09,<br>-0.09) | 0.109  | 2659.99<br>(2469.46<br>2575.49)      | 2741.45<br>(2575.49<br>2575.49)      | 0.12<br>(0.04,<br>0.04)    | 44.07<br>(22.49,<br>26.38) | 45.58<br>(26.38,<br>26.38) | 0.13<br>(0.04,<br>0.04)    | 0.003  |

|                       |          |          |         |        |          |          |         |        |          |          |         |        |         |         |         |        |
|-----------------------|----------|----------|---------|--------|----------|----------|---------|--------|----------|----------|---------|--------|---------|---------|---------|--------|
|                       | 216.18)  | 192.43)  | -0.28)  |        | ,        | ,        | 0.01)   |        | ,        | ,        | 0.20)   |        | 78.92)  | 73.76)  | 0.22)   |        |
|                       |          |          |         |        | 1860.01) | 1812.67) |         |        | 2862.23) | 2915.63) |         |        |         |         |         |        |
|                       | 81.01    | 75.78    | -0.23   |        | 759.71   | 729.94   | -0.13   |        | 397.97   | 377.27   | -0.18   |        | 5.94    | 5.69    | -0.14   |        |
| San Marino            | (20.49,  | (19.77,  | (-0.26, | <0.001 | (527.76, | (512.48, | (-0.17, | <0.001 | (235.99, | (227.34, | (-0.28, | <0.001 | (0.00,  | (0.00,  | (-0.26, | 0.016  |
|                       | 217.86)  | 201.10)  | -0.19)  |        | 1060.62) | 1010.16) | -0.09)  |        | 630.49)  | 590.92)  | -0.08)  |        | 97.42)  | 89.28)  | -0.03)  |        |
|                       |          |          |         |        | 2926.97  | 3243.35  |         |        |          | 1178.40  |         |        |         |         |         |        |
| Sao Tome and Principe | 169.01   | 180.20   | 0.21    |        | (2686.59 | (3075.08 | 0.35    |        | 1118.35  | (1076.60 | 0.31    |        | 16.57   | 16.46   | 0.11    |        |
|                       | (114.08, | (142.02, | (0.16,  | <0.001 |          |          | (0.33,  | <0.001 | (958.40, |          | (-0.07, | 0.109  | (2.68,  | (6.50,  | (-0.31, | 0.607  |
|                       | 244.83)  | 225.83)  | 0.26)   |        | ,        | ,        | 0.38)   |        | 1299.32) | ,        | 0.69)   |        | 56.84)  | 34.67)  | 0.54)   |        |
|                       |          |          |         |        | 3186.13) | 3418.77) |         |        |          | 1287.50) |         |        |         |         |         |        |
|                       |          |          |         |        |          | 1073.24  |         |        |          |          |         |        |         |         |         |        |
|                       | 87.41    | 98.14    | 0.41    |        | 984.33   | (1067.20 | 0.43    |        | 938.83   | 938.90   | -0.00   |        | 14.99   | 14.94   | -0.03   |        |
| Saudi Arabia          | (84.43,  | (96.35,  | (0.37,  | <0.001 | (974.29, |          | (-0.27, | 0.226  | (928.92, | (933.46, | (-0.27, | 0.987  | (13.75, | (14.27, | (-0.41, | 0.874  |
|                       | 90.48)   | 99.96)   | 0.45)   |        | 994.46)  | 1079.31) | 1.14)   |        | 948.83)  | 944.37)  | 0.26)   |        | 16.31)  | 15.64)  | 0.35)   |        |
|                       |          |          |         |        | 2437.32  | 2460.03  |         |        | 1162.07  | 1029.81  |         |        | 17.36   | 15.11   | -0.44   |        |
| Senegal               | 165.14   | 160.35   | -0.11   |        | (2409.49 | (2441.87 | 0.04    |        | (1142.23 | (1017.69 | -0.40   |        | (14.98, | (13.65, | (-1.05, | 0.153  |
|                       | (157.91, | (155.72, | (-0.12, | <0.001 |          |          | (-0.03, | 0.286  |          |          | (-0.93, | 0.136  | (14.98, | (13.65, | (-1.05, |        |
|                       | 172.64)  | 165.09)  | -0.09)  |        | ,        | ,        | 0.11)   |        | ,        | ,        | 0.13)   |        | 20.04)  | 16.69)  | 0.17)   |        |
|                       |          |          |         |        | 2465.42) | 2478.31) |         |        | 1182.19) | 1042.05) |         |        |         |         |         |        |
|                       |          |          |         |        |          |          |         |        | 1358.31  |          |         |        |         |         |         |        |
|                       | 113.49   | 111.73   | -0.05   |        | 856.62   | 885.77   | 0.12    |        | (1341.55 | 634.95   | -2.54   |        | 22.90   | 10.10   | -2.75   |        |
| Serbia                | (108.65, | (106.49, | (-0.08, | 0.005  | (843.22, | (870.89, | (-0.01, | 0.065  |          | (622.52, | (-2.97, | <0.001 | (20.77, | (8.59,  | (-3.23, | <0.001 |
|                       | 118.50)  | 117.18)  | -0.02)  |        | 870.19)  | 900.85)  | 0.25)   |        | ,        | 647.58)  | -2.11)  |        | 25.19)  | 11.81)  | -2.26)  |        |
|                       |          |          |         |        |          |          |         |        | 1375.24) |          |         |        |         |         |         |        |
|                       |          |          |         |        | 1505.28  | 1440.84  |         |        | 2108.01  | 1419.10  |         |        |         |         |         |        |
| Seychelles            | 136.20   | 127.06   | -0.23   |        | (1315.95 | (1285.73 | -0.14   |        | (1876.36 | (1269.21 | -1.37   |        | 35.18   | 22.61   | -1.54   |        |
|                       | (83.64,  | (84.27,  | (-0.27, | <0.001 |          |          | (-0.19, | <0.001 |          |          | (-2.28, | 0.004  | (11.31, | (7.64,  | (-2.55, | 0.003  |
|                       | 211.58)  | 186.23)  | -0.20)  |        | ,        | ,        | -0.08)  |        | ,        | ,        | -0.44)  |        | 84.39)  | 55.55)  | -0.51)  |        |
|                       |          |          |         |        | 1715.85) | 1611.28) |         |        | 2361.53) | 1583.86) |         |        |         |         |         |        |
|                       |          |          |         |        | 2626.67  | 2740.39  |         |        | 1198.70  | 1166.65  |         |        |         |         |         |        |
| Sierra Leone          | 178.10   | 177.46   | -0.01   |        | (2586.45 | (2714.93 | 0.15    |        | (1171.00 | (1149.51 | -0.09   |        | 17.79   | 17.22   | -0.10   |        |
|                       | (167.68, | (170.97, | (-0.03, | 0.076  |          |          | (0.13,  | <0.001 |          |          | (-0.36, | 0.536  | (14.53, | (15.17, | (-0.41, | 0.516  |
|                       | 189.04)  | 184.16)  | 0.00)   |        | ,        | ,        | 0.18)   |        | ,        | ,        | 0.19)   |        | 21.59)  | 19.49)  | 0.21)   |        |
|                       |          |          |         |        | 2667.40) | 2766.06) |         |        | 1226.91) | 1184.00) |         |        |         |         |         |        |
|                       |          |          |         |        |          |          |         |        |          |          |         |        |         |         |         |        |
|                       | 125.46   | 123.95   | -0.04   |        | 758.35   | 754.15   | -0.03   |        | 947.56   | 378.44   | -3.10   |        | 15.71   | 5.77    | -3.39   |        |
| Singapore             | (117.71, | (117.59, | (-0.06, | <0.001 | (739.11, | (739.35, | (-0.10, | 0.506  | (926.06, | (367.37, | (-3.79, | <0.001 | (13.05, | (4.51,  | (-4.24, | <0.001 |
|                       | 133.61)  | 130.64)  | -0.02)  |        | 777.99)  | 769.25)  | 0.05)   |        | 969.46)  | 389.82)  | -2.41)  |        | 18.78)  | 7.38)   | -2.54)  |        |
|                       |          |          |         |        |          |          |         |        |          |          |         |        |         |         |         |        |
| Slovakia              | 105.72   | 102.24   | -0.12   | <0.001 | 935.76   | 927.14   | -0.01   | 0.726  | 1330.15  | 581.17   | -2.95   | <0.001 | 22.53   | 9.09    | -3.23   | <0.001 |

|                 |          |          |         |        |          |          |         |        |          |          |         |        |         |         |         |        |
|-----------------|----------|----------|---------|--------|----------|----------|---------|--------|----------|----------|---------|--------|---------|---------|---------|--------|
|                 | (99.68,  | (96.03,  | (-0.14, |        | (917.53, | (907.96, | (-0.08, |        | (1308.84 | (566.59, | (-3.51, |        | (19.84, | (7.38,  | (-3.86, |        |
|                 | 112.05)  | 108.81)  | -0.10)  |        | 954.28)  | 946.68)  | 0.05)   |        | ,        | 596.10)  | -2.38)  |        | 25.50)  | 11.17)  | -2.60)  |        |
|                 |          |          |         |        |          |          |         |        | 1351.75) |          |         |        |         |         |         |        |
|                 | 100.30   | 103.51   | 0.11    |        | 710.86   | 731.24   | 0.08    |        | 789.81   | 253.67   | -3.88   |        | 13.13   | 3.60    | -4.48   |        |
| Slovenia        | (90.85,  | (92.88,  | (0.07,  | <0.001 | (685.53, | (703.10, | (0.02,  | 0.005  | (763.36, | (237.32, | (-4.31, | <0.001 | (9.94,  | (1.93,  | (-5.03, | <0.001 |
|                 | 110.52)  | 115.21)  | 0.15)   |        | 736.96)  | 760.40)  | 0.14)   |        | 817.01)  | 271.04)  | -3.45)  |        | 17.11)  | 6.45)   | -3.93)  |        |
|                 |          |          |         |        |          |          |         |        |          |          |         |        |         |         |         |        |
|                 | 169.68   | 157.33   | -0.26   |        | 1440.45  | 1424.40  |         |        | 6188.56  | 6401.90  | 0.12    |        | 108.23  | 112.22  | 0.13    |        |
| Solomon Islands | (136.63, | (135.81, | (-0.29, | <0.001 | (1342.97 | (1358.80 | (-0.15, | 0.930  | (5973.96 | (6257.85 | (-0.01, | 0.067  | (81.30, | (93.80, | (-0.00, | 0.055  |
|                 | 208.77)  | 181.38)  | -0.24)  |        | ,        | ,        | 0.14)   |        | ,        | ,        | 0.24)   |        | 141.53) | 133.24) | 0.25)   |        |
|                 |          |          |         |        |          |          |         |        |          |          |         |        |         |         |         |        |
|                 | 210.05   | 208.04   | -0.04   |        | 2604.14  | 2708.08  | 0.14    |        | 1632.25  | 1492.14  | -0.28   |        | 25.52   | 22.94   | -0.35   |        |
| Somalia         | (201.98, | (203.49, | (-0.05, | <0.001 | (2575.23 | (2691.47 | (0.09,  | <0.001 | (1609.14 | (1479.44 | (-0.44, | <0.001 | (22.69, | (21.37, | (-0.53, | <0.001 |
|                 | 218.39)  | 212.67)  | -0.02)  |        | ,        | ,        | 0.19)   |        | ,        | ,        | -0.12)  |        | 28.62)  | 24.60)  | -0.17)  |        |
|                 |          |          |         |        |          |          |         |        |          |          |         |        |         |         |         |        |
|                 | 197.35   | 186.48   | -0.19   |        | 2490.22  | 2501.81  | 0.02    |        | 1554.08  | 924.24   | -1.92   |        | 25.10   | 13.73   | -2.24   |        |
| South Africa    | (194.16, | (184.05, | (-0.22, | <0.001 | (2478.88 | (2492.91 | (-0.01, | 0.160  | (1544.72 | (918.92, | (-2.74, | <0.001 | (23.92, | (13.09, | (-3.22, | <0.001 |
|                 | 200.58)  | 188.93)  | -0.17)  |        | ,        | ,        | 0.05)   |        | ,        | 929.58)  | -1.09)  |        | 26.33)  | 14.39)  | -1.25)  |        |
|                 |          |          |         |        |          |          |         |        |          |          |         |        |         |         |         |        |
|                 | 167.81   | 167.93   | 0.00    |        | 2486.79  | 2570.47  | 0.13    |        | 1016.35  | 858.19   | -0.50   |        | 15.03   | 12.17   | -0.64   |        |
| South Sudan     | (160.35, | (161.32, | (-0.00, | 0.236  | (2457.65 | (2544.05 | (0.09,  | <0.001 | (996.92, | (842.50, | (-0.88, | 0.010  | (12.70, | (10.34, | (-1.08, | 0.005  |
|                 | 175.57)  | 174.76)  | 0.01)   |        | ,        | ,        | 0.18)   |        | 1036.09) | 874.11)  | -0.12)  |        | 17.68)  | 14.25)  | -0.19)  |        |
|                 |          |          |         |        |          |          |         |        |          |          |         |        |         |         |         |        |
|                 | 89.26    | 77.55    | -0.50   |        | 557.39   | 524.50   | -0.19   |        | 953.75   | 344.72   | -3.46   |        | 15.62   | 5.27    | -3.69   |        |
| Spain           | (87.10,  | (75.49,  | (-0.56, | <0.001 | (551.99, | (519.10, | (-0.30, | 0.001  | (946.68, | (340.41, | (-3.81, | <0.001 | (14.72, | (4.75,  | (-4.10, | <0.001 |
|                 | 91.45)   | 79.66)   | -0.44)  |        | 562.83)  | 529.96)  | -0.07)  |        | 960.86)  | 349.08)  | -3.12)  |        | 16.56)  | 5.82)   | -3.28)  |        |
|                 |          |          |         |        |          |          |         |        |          |          |         |        |         |         |         |        |
|                 | 83.14    | 80.27    | -0.12   |        | 699.86   | 694.21   | 0.01    |        | 1741.82  | 1052.97  | -1.60   |        | 28.99   | 16.93   | -1.71   |        |
| Sri Lanka       | (80.18,  | (77.51,  | (-0.13, | <0.001 | (691.22, | (686.06, | (-0.20, | 0.934  | (1728.14 | (1042.93 | (-3.47, | 0.099  | (27.25, | (15.68, | (-3.66, | 0.090  |
|                 | 86.18)   | 83.11)   | -0.11)  |        | 708.59)  | 702.44)  | 0.22)   |        | ,        | ,        | 0.30)   |        | 30.82)  | 18.25)  | 0.27)   |        |
|                 |          |          |         |        |          |          |         |        |          |          |         |        |         |         |         |        |
|                 | 158.75   | 162.11   | 0.07    |        | 1710.02  | 1836.83  | 0.27    |        | 2583.51  | 1782.75  | -1.29   |        | 43.49   | 28.88   | -1.42   |        |
| Sudan           | (154.48, | (159.27, | (0.06,  | <0.001 | (1695.99 | (1827.30 | (0.09,  | 0.003  | (2565.65 | (1773.13 | (-1.39, | <0.001 | (41.18, | (27.65, | (-1.54, | <0.001 |
|                 | 163.12)  | 164.98)  | 0.09)   |        | ,        | ,        | 0.45)   |        | ,        | ,        | -1.18)  |        | 45.90)  | 30.15)  | -1.31)  |        |
|                 |          |          |         |        |          |          |         |        |          |          |         |        |         |         |         |        |
|                 |          |          |         |        | 1724.13) | 1846.39) |         |        | 2601.46) | 1792.41) |         |        |         |         |         |        |

|                            |          |          |         |        |          |          |         |        |          |          |         |        |         |         |         |        |
|----------------------------|----------|----------|---------|--------|----------|----------|---------|--------|----------|----------|---------|--------|---------|---------|---------|--------|
|                            | 189.52   | 195.65   | 0.11    |        | 1974.07  | 2037.95  | 0.11    |        | 1734.64  | 1229.83  | -1.22   |        | 28.87   | 19.88   | -1.65   |        |
| Suriname                   | (159.63, | (169.95, | (0.07,  | <0.001 | (1874.96 | (1953.03 | (0.09,  | <0.001 | (1637.19 | (1164.05 | (-2.66, | 0.099  | (17.42, | (12.33, | (-3.64, | 0.111  |
|                            | 223.94)  | 224.19)  | 0.14)   |        | ,        | ,        | 0.13)   |        | ,        | ,        | 0.23)   |        | 45.44)  | 30.43)  | 0.38)   |        |
|                            |          |          |         |        | 2077.55) | 2125.68) |         |        | 1836.73) | 1298.42) |         |        |         |         |         |        |
|                            | 89.19    | 97.42    | 0.31    |        | 789.21   | 822.75   | 0.18    |        | 558.34   | 266.32   | -2.48   |        | 8.53    | 3.29    | -3.26   |        |
| Sweden                     | (84.55,  | (92.81,  | (0.29,  | <0.001 | (775.21, | (809.19, | (-0.25, | 0.414  | (546.65, | (258.64, | (-2.67, | <0.001 | (7.14,  | (2.50,  | (-3.97, | <0.001 |
|                            | 94.02)   | 102.22)  | 0.34)   |        | 803.41)  | 836.49)  | 0.62)   |        | 570.22)  | 274.19)  | -2.29)  |        | 10.12)  | 4.28)   | -2.54)  |        |
|                            | 75.90    | 69.45    | -0.31   |        | 471.02   | 438.88   | -0.24   |        | 571.11   | 189.40   | -3.81   |        | 9.26    | 2.68    | -4.28   |        |
| Switzerland                | (71.44,  | (65.31,  | (-0.34, | <0.001 | (459.84, | (428.48, | (-0.38, | 0.001  | (558.79, | (182.62, | (-4.69, | <0.001 | (7.76,  | (1.93,  | (-5.31, | <0.001 |
|                            | 80.61)   | 73.81)   | -0.29)  |        | 482.44)  | 449.51)  | -0.10)  |        | 583.67)  | 196.41)  | -2.92)  |        | 11.01)  | 3.66)   | -3.24)  |        |
|                            | 173.16   | 155.40   | -0.37   |        | 1877.84  | 1868.73  | -0.02   |        | 3944.55  | 2141.92  | -2.11   |        | 64.71   | 34.22   | -2.19   |        |
| Syrian Arab Republic       | (167.60, | (149.93, | (-0.41, | <0.001 | (1859.33 | (1849.60 | (-0.06, | 0.371  | (3917.62 | (2121.42 | (-2.64, | <0.001 | (61.25, | (31.66, | (-2.75, | <0.001 |
|                            | 178.87)  | 161.04)  | -0.33)  |        | ,        | ,        | 0.02)   |        | ,        | ,        | -1.58)  |        | 68.32)  | 36.96)  | -1.63)  |        |
|                            | 81.58    | 81.32    | -0.02   |        | 1896.50) | 1888.04) |         |        | 3971.64) | 2162.61) |         |        |         |         |         |        |
| Taiwan (Province of China) | (79.05,  | (78.64,  | (-0.05, | 0.296  | 742.97   | 804.92   | 0.27    |        | 775.25   | 619.05   | -0.85   |        | 12.16   | 9.64    | -0.88   |        |
|                            | 84.19)   | 84.08)   | 0.02)   |        | (735.27, | (796.57, | (0.15,  | <0.001 | (767.39, | (611.83, | (-1.42, | 0.004  | (11.19, | (8.77,  | (-1.52, | 0.007  |
|                            |          |          |         |        | 750.74)  | 813.35)  | 0.39)   |        | 783.18)  | 626.33)  | -0.28)  |        | 13.19)  | 10.59)  | -0.24)  |        |
|                            | 166.54   | 164.26   | -0.04   |        | 1591.07  | 1588.20  | -0.01   |        | 1266.92  | 1107.45  | -0.39   |        | 20.84   | 18.05   | -0.42   |        |
| Tajikistan                 | (158.44, | (158.69, | (-0.07, | 0.003  | (1565.73 | (1570.79 | (-0.06, | 0.645  | (1243.18 | (1092.62 | (-0.92, | 0.146  | (17.85, | (16.19, | (-0.99, | 0.148  |
|                            | 174.98)  | 169.98)  | -0.02)  |        | ,        | ,        | 0.04)   |        | ,        | ,        | 0.14)   |        | 24.20)  | 20.08)  | 0.15)   |        |
|                            | 132.21   | 127.66   | -0.12   |        | 1616.75) | 1605.77) |         |        | 1291.01) | 1122.43) |         |        |         |         |         |        |
| Thailand                   | (130.19, | (125.69, | (-0.15, | <0.001 | 1314.60  | 1278.83  | -0.09   |        | 1353.83  | 1393.60  | 0.25    |        | 21.74   | 22.42   | 0.26    |        |
|                            | 134.26)  | 129.67)  | -0.10)  |        | (1308.22 | (1272.53 | (-0.15, | 0.008  | (1347.24 | (1387.14 | (-0.57, | 0.554  | (20.91, | (21.62, | (-0.59, | 0.552  |
|                            |          |          |         |        | ,        | ,        | -0.02)  |        | ,        | ,        | 1.08)   |        | 22.60)  | 23.25)  | 1.11)   |        |
|                            | 141.54   | 143.92   | 0.06    |        | 1321.01) | 1285.16) |         |        | 1360.45) | 1400.08) |         |        |         |         |         |        |
| Timor-Leste                | (123.34, | (128.62, | (0.05,  | <0.001 | 1356.46  | 1425.31  | 0.17    |        | 1007.76  | 1352.72  | 1.06    |        | 15.52   | 21.10   | 1.10    |        |
|                            | 161.82)  | 160.70)  | 0.07)   |        | (1298.84 | (1376.27 | (0.14,  | <0.001 | (957.27, | (1303.98 | (0.46,  | 0.001  | (9.79,  | (15.33, | (0.45,  | 0.001  |
|                            |          |          |         |        | ,        | ,        | 0.21)   |        | 1060.32) | ,        | 1.66)   |        | 23.51)  | 28.47)  | 1.75)   |        |
|                            | 170.98   | 172.52   | 0.03    |        | 1416.12) | 1475.80) |         |        | 1280.42  | 1278.20  | 0.04    |        | 19.32   | 19.30   | 0.05    |        |
| Togo                       | (160.51, | (165.82, | (0.02,  | <0.001 | 2552.91  | 2655.49  | 0.14    |        | 1280.42  | 1278.20  | 0.04    |        | 19.32   | 19.30   | 0.05    |        |
|                            | 182.02)  | 179.44)  | 0.04)   |        | (2512.52 | (2629.24 | (0.11,  | <0.001 | (1250.54 | (1259.39 | (-0.24, | 0.803  | (15.75, | (17.03, | (-0.22, | 0.697  |
|                            |          |          |         |        | ,        | ,        | 0.17)   |        | ,        | ,        | 0.31)   |        | 23.51)  | 21.81)  | 0.33)   |        |
|                            |          |          |         |        | 2593.85) | 2681.96) |         |        | 1310.90) | 1297.22) |         |        |         |         |         |        |

|                        |          |          |         |        |          |          |         |        |          |          |         |        |         |         |         |        |
|------------------------|----------|----------|---------|--------|----------|----------|---------|--------|----------|----------|---------|--------|---------|---------|---------|--------|
| Tokelau                | 119.56   | 106.79   | -0.39   |        | 999.86   | 970.34   | -0.10   |        | 2403.91  | 2134.67  | -0.41   |        | 40.15   | 35.54   | -0.42   |        |
|                        | (0.00,   | (0.00,   |         |        |          |          |         |        |          |          |         |        | (0.00,  | (0.00,  |         |        |
|                        | 1806.16  | 1994.15  | (-0.41, | <0.001 | (179.82, | (150.87, | (-0.14, | <0.001 | (903.32, | (705.01, | (-0.44, | <0.001 | 1661.49 | 1865.95 | (-0.45, | <0.001 |
|                        | )        | )        | -0.37)  |        | 3225.38) | 3383.49) | -0.05)  |        | 5242.61) | 5077.49) | -0.38)  |        | )       | )       | -0.39)  |        |
| Tonga                  | 141.57   | 142.84   | 0.04    |        | 2000.77  | 2055.67  | 0.10    |        | 1370.53  | 1548.42  | 0.44    |        | 21.64   | 24.41   | 0.42    |        |
|                        | (87.78,  | (92.11,  | (-0.04, | 0.322  | (1784.62 | (1849.58 | (0.01,  | 0.023  | (1178.71 | (1364.31 | (0.28,  | <0.001 | (4.07,  | (6.58,  | (0.24,  | <0.001 |
|                        | 220.09)  | 212.68)  | 0.13)   |        | ,        | ,        | 0.18)   |        | ,        | ,        | 0.61)   |        | 69.15)  | 63.79)  | 0.60)   |        |
| Trinidad and<br>Tobago | 203.56   | 197.85   | -0.10   |        | 2183.68  | 2158.31  | -0.03   |        | 1628.26  | 1084.82  | -1.26   |        | 26.76   | 17.19   | -1.49   |        |
|                        | (186.15, | (181.22, | (-0.11, | <0.001 | (2125.77 | (2102.47 | (-0.06, | 0.032  | (1577.75 | (1046.69 | (-2.27, | 0.014  | (20.61, | (12.75, | (-2.10, | <0.001 |
|                        | 222.21)  | 215.72)  | -0.08)  |        | ,        | ,        | -0.00)  |        | ,        | ,        | -0.25)  |        | 34.21)  | 22.86)  | -0.88)  |        |
| Tunisia                | 85.60    | 89.39    | 0.16    |        | 873.05   | 982.24   | 0.39    |        | 1109.93  | 940.62   | -0.57   |        | 18.27   | 15.11   | -0.66   |        |
|                        | (81.03,  | (85.56,  | (0.12,  | <0.001 | (858.45, | (969.36, | (0.34,  | <0.001 | (1093.16 | (928.19, | (-0.67, | <0.001 | (16.15, | (13.58, | (-0.77, | <0.001 |
|                        | 90.38)   | 93.34)   | 0.19)   |        | 887.85)  | 995.27)  | 0.45)   |        | ,        | 953.19)  | -0.48)  |        | 20.60)  | 16.77)  | -0.55)  |        |
| Turkey                 | 80.90    | 73.53    | -0.32   |        | 1093.86  | 1004.25  | -0.29   |        | 1410.48  | 582.44   | -3.04   |        | 23.53   | 8.75    | -3.37   |        |
|                        | (79.27,  | (72.29,  | (-0.39, | <0.001 | (1087.87 | (999.62, | (-0.35, | <0.001 | (1403.54 | (578.94, | (-3.41, | <0.001 | (22.64, | (8.33,  | (-3.74, | <0.001 |
|                        | 82.56)   | 74.79)   | -0.25)  |        | ,        | 1008.89) | -0.23)  |        | ,        | 585.95)  | -2.66)  |        | 24.46)  | 9.19)   | -2.99)  |        |
| Turkmenistan           | 176.87   | 200.01   | 0.43    |        | 1638.05  | 1776.35  | 0.27    |        | 2481.90  | 2644.61  | 0.38    |        | 41.89   | 44.09   | 0.33    |        |
|                        | (167.18, | (191.71, | (0.40,  | <0.001 | (1608.29 | (1751.45 | (0.26,  | <0.001 | (2444.06 | (2614.32 | (-0.32, | 0.291  | (37.05, | (40.25, | (-0.39, | 0.370  |
|                        | 187.01)  | 208.59)  | 0.47)   |        | ,        | ,        | 0.28)   |        | ,        | ,        | 1.07)   |        | 47.21)  | 48.20)  | 1.06)   |        |
| Tuvalu                 | 138.49   | 123.58   | -0.40   |        | 986.38   | 957.56   | -0.10   |        | 4094.15  | 4145.75  | 0.03    |        | 69.95   | 71.31   | 0.06    |        |
|                        | (19.81,  | (25.52,  | (-0.41, | <0.001 | (563.35, | (609.40, | (-0.15, | <0.001 | (3163.18 | (3371.19 | (-0.06, | 0.505  | (2.42,  | (6.54,  | (-0.04, | 0.269  |
|                        | 482.15)  | 369.18)  | -0.38)  |        | 1610.55) | 1437.96) | -0.04)  |        | ,        | ,        | 0.13)   |        | 373.51) | 290.23) | 0.15)   |        |
| Uganda                 | 196.03   | 185.31   | -0.19   |        | 2742.83  | 2936.50  | 0.25    |        | 1072.53  | 1169.43  | 0.26    |        | 15.71   | 17.15   | 0.23    |        |
|                        | (190.96, | (182.19, | (-0.22, | <0.001 | (2723.57 | (2923.93 | (0.22,  | <0.001 | (1059.95 | (1161.11 | (-0.01, | 0.056  | (14.19, | (16.14, | (-0.12, | 0.195  |
|                        | 201.22)  | 188.47)  | -0.16)  |        | ,        | ,        | 0.28)   |        | ,        | ,        | 0.54)   |        | 17.36)  | 18.22)  | 0.58)   |        |
| Ukraine                | 126.05   | 149.22   | 0.59    | <0.001 | 708.10   | 793.40   | 0.41    | <0.001 | 1731.53  | 3528.09  | 2.36    | 0.055  | 29.82   | 61.67   | 2.55    | <0.001 |



|                    |          |          |         |        |          |          |         |        |          |          |         |        |         |         |         |        |
|--------------------|----------|----------|---------|--------|----------|----------|---------|--------|----------|----------|---------|--------|---------|---------|---------|--------|
|                    | (123.85, | (146.57, | (0.44,  |        | (702.89, | (787.33, | (0.30,  |        | (1723.42 | (3515.46 | (-0.05, |        | (28.77, | (60.02, | (1.12,  |        |
|                    | 128.28)  | 151.92)  | 0.74)   |        | 713.33)  | 799.52)  | 0.53)   |        | ,        | ,        | 4.82)   |        | 30.90)  | 63.35)  | 4.01)   |        |
|                    |          |          |         |        |          |          |         |        | 1739.66) | 3540.76) |         |        |         |         |         |        |
|                    |          |          |         |        | 1520.37  | 1550.90  |         |        | 1135.24  |          |         |        |         |         |         |        |
| United Arab        | 136.44   | 142.50   | 0.15    |        | (1490.37 | (1533.01 | 0.10    |        | (1109.49 | 934.10   | -0.70   |        | 17.72   | 14.41   | -0.76   |        |
| Emirates           | (127.42, | (137.00, | (0.10,  | <0.001 | ,        | ,        | (-0.01, | 0.069  | ,        | (921.48, | (-0.96, | <0.001 | (14.71, | (12.97, | (-1.09, | <0.001 |
|                    | 146.12)  | 148.23)  | 0.20)   |        | 1551.01) | 1569.01) | 0.22)   |        | 1161.63) | 946.94)  | -0.43)  |        | 21.42)  | 16.06)  | -0.42)  |        |
|                    |          |          |         |        |          |          |         |        |          |          |         |        |         |         |         |        |
| United Kingdom     | 93.12    | 86.27    | -0.29   |        | 634.27   | 622.23   | -0.06   |        | 702.69   | 459.60   | -1.46   |        | 11.59   | 7.32    | -1.57   |        |
|                    | (91.29,  | (84.59,  | (-0.33, | <0.001 | (629.48, | (617.71, | (-0.11, | 0.025  | (697.65, | (455.76, | (-1.81, | <0.001 | (10.95, | (6.84,  | (-1.93, | <0.001 |
|                    | 94.98)   | 87.97)   | -0.25)  |        | 639.10)  | 626.78)  | -0.01)  |        | 707.77)  | 463.46)  | -1.10)  |        | 12.25)  | 7.82)   | -1.21)  |        |
|                    |          |          |         |        |          |          |         |        |          |          |         |        |         |         |         |        |
| United Republic of | 179.34   | 182.73   | 0.07    |        | 2528.82  | 2711.47  | 0.25    |        | 1289.85  | 1044.26  | -0.72   |        | 19.54   | 15.10   | -0.89   |        |
| Tanzania           | (175.35, | (180.10, | (0.03,  | <0.001 | (2513.65 | (2701.23 | (0.18,  | <0.001 | (1278.67 | (1037.76 | (-0.84, | <0.001 | (18.16, | (14.32, | (-1.02, | <0.001 |
|                    | 183.41)  | 185.39)  | 0.11)   |        | ,        | ,        | 0.31)   |        | ,        | ,        | -0.61)  |        | 20.99)  | 15.91)  | -0.75)  |        |
|                    |          |          |         |        |          |          |         |        |          |          |         |        |         |         |         |        |
| United States of   | 138.56   | 135.12   | -0.10   |        | 1282.45  | 1313.66  | 0.11    |        | 836.66   | 668.44   | -0.78   |        | 13.40   | 10.23   | -0.93   |        |
| America            | (137.57, | (134.17, | (-0.12, | <0.001 | (1279.43 | (1310.69 | (-0.25, | 0.547  | (834.23, | (666.33, | (-1.01, | <0.001 | (13.10, | (9.97,  | (-1.33, | <0.001 |
|                    | 139.56)  | 136.08)  | -0.07)  |        | ,        | ,        | 0.48)   |        | 839.10)  | 670.55)  | -0.54)  |        | 13.71)  | 10.49)  | -0.54)  |        |
|                    |          |          |         |        |          |          |         |        |          |          |         |        |         |         |         |        |
| United States      | 111.17   | 122.88   | 0.35    |        | 809.24   | 871.90   | 0.25    |        | 1571.56  | 814.34   | -2.18   |        | 26.72   | 13.62   | -2.24   |        |
| Virgin Islands     | (68.15,  | (72.95,  | (0.33,  | <0.001 | (684.76, | (728.04, | (0.20,  | <0.001 | (1395.38 | (676.47, | (-2.79, | <0.001 | (8.55,  | (1.73,  | (-2.96, | <0.001 |
|                    | 171.80)  | 195.04)  | 0.38)   |        | 950.37)  | 1036.77) | 0.29)   |        | ,        | 973.06)  | -1.57)  |        | 63.72)  | 50.59)  | -1.52)  |        |
|                    |          |          |         |        |          |          |         |        | 1764.31) |          |         |        |         |         |         |        |
| Uruguay            | 74.01    | 74.60    | 0.03    |        | 534.19   | 572.11   | 0.26    |        | 1006.99  | 500.26   | -2.14   |        | 16.82   | 7.83    | -2.34   |        |
|                    | (67.02,  | (67.86,  | (0.01,  | <0.001 | (515.18, | (553.13, | (0.14,  | <0.001 | (980.73, | (482.58, | (-2.59, | <0.001 | (13.57, | (5.76,  | (-2.82, | <0.001 |
|                    | 81.54)   | 81.84)   | 0.04)   |        | 553.71)  | 591.58)  | 0.38)   |        | 1033.79) | 518.44)  | -1.69)  |        | 20.62)  | 10.41)  | -1.85)  |        |
|                    |          |          |         |        |          |          |         |        |          |          |         |        |         |         |         |        |
| Uzbekistan         | 165.41   | 170.46   | 0.11    |        | 1594.77  | 1738.31  | 0.31    |        | 1628.73  | 1964.59  | 0.72    |        | 27.00   | 32.58   | 0.73    |        |
|                    | (161.46, | (167.45, | (0.09,  | <0.001 | (1582.46 | (1728.65 | (0.27,  | <0.001 | (1615.91 | (1954.32 | (0.20,  | 0.006  | (25.36, | (31.27, | (0.17,  | 0.011  |
|                    | 169.43)  | 173.52)  | 0.13)   |        | ,        | ,        | 0.34)   |        | ,        | ,        | 1.24)   |        | 28.73)  | 33.93)  | 1.29)   |        |
|                    |          |          |         |        |          |          |         |        |          |          |         |        |         |         |         |        |
| Vanuatu            | 199.89   | 188.88   | -0.20   |        | 1826.89  | 1784.71  | -0.07   |        | 4666.73  | 5579.75  | 0.58    |        | 79.51   | 95.52   | 0.60    |        |
|                    | (149.68, | (154.10, | (-0.21, | <0.001 | (1669.25 | (1674.89 | (-0.12, | 0.003  | (4406.07 | (5380.48 | (0.42,  | <0.001 | (48.68, | (70.93, | (0.44,  | <0.001 |
|                    | 262.10)  | 229.43)  | -0.18)  |        | ,        | ,        | -0.03)  |        | ,        | ,        | 0.75)   |        | 123.00) | 126.07) | 0.76)   |        |
|                    |          |          |         |        |          |          |         |        |          |          |         |        |         |         |         |        |
|                    |          |          |         |        | 1995.97) | 1900.09) |         |        | 4939.13) | 5784.68) |         |        |         |         |         |        |

|                        |          |          |         |        |          |          |         |        |          |          |         |        |         |         |         |        |
|------------------------|----------|----------|---------|--------|----------|----------|---------|--------|----------|----------|---------|--------|---------|---------|---------|--------|
| Venezuela              | 79.39    | 73.08    | -0.28   |        | 643.77   | 612.47   | -0.17   |        | 1199.50  | 755.98   | -1.52   |        | 20.28   | 12.62   | -1.58   |        |
| (Bolivarian            | (76.54,  | (70.79,  | (-0.30, | <0.001 | (635.65, | (605.81, | (-0.26, | 0.001  | (1188.29 | (748.63, | (-2.07, | <0.001 | (18.83, | (11.69, | (-2.15, | <0.001 |
| Republic of)           | 82.32)   | 75.43)   | -0.26)  |        | 651.97)  | 619.19)  | -0.07)  |        | ,        | 763.38)  | -0.96)  |        | 21.81)  | 13.60)  | -1.01)  |        |
|                        |          |          |         |        |          |          |         |        | 1210.79) |          |         |        |         |         |         |        |
|                        | 96.92    | 89.94    | -0.25   |        | 766.50   | 809.31   | 0.24    |        | 1305.70  | 965.28   | -1.04   |        | 21.55   | 15.32   | -1.18   |        |
| Viet Nam               | (95.17,  | (88.66,  | (-0.30, | <0.001 | (761.62, | (805.42, | (-0.06, | 0.123  | (1299.22 | (961.09, | (-1.15, | <0.001 | (20.71, | (14.80, | (-1.29, | <0.001 |
|                        | 98.69)   | 91.24)   | -0.19)  |        | 771.40)  | 813.21)  | 0.54)   |        | ,        | 969.49)  | -0.93)  |        | 22.41)  | 15.85)  | -1.07)  |        |
|                        |          |          |         |        |          |          |         |        | 1312.21) |          |         |        |         |         |         |        |
|                        | 169.37   | 169.13   | -0.01   |        | 1832.73  | 1926.00  | 0.19    |        | 2040.23  | 1671.51  | -0.64   |        | 34.40   | 27.36   | -0.74   |        |
| Yemen                  | (163.81, | (165.93, | (-0.03, | 0.321  | (1814.35 | (1915.16 | (0.14,  | <0.001 | (2020.04 | (1661.23 | -0.64   |        | (31.80, | (26.05, | (-1.00, | <0.001 |
|                        | 175.08)  | 172.38)  | 0.01)   |        | ,        | ,        | 0.23)   |        | ,        | ,        | -0.38)  |        | 37.15)  | 28.71)  | -0.48)  |        |
|                        |          |          |         |        | 1851.26) | 1936.89) |         |        | 2060.57) | 1681.85) |         |        |         |         |         |        |
|                        | 177.63   | 180.21   | 0.04    |        | 2478.52  | 2534.40  | 0.07    |        | 1183.92  | 1258.51  | 0.20    |        | 17.82   | 19.18   | 0.25    |        |
| Zambia                 | (170.54, | (175.84, | (0.03,  | <0.001 | (2451.57 | (2517.80 | (0.03,  | <0.001 | (1164.46 | (1246.46 | 0.20    |        | (15.45, | (17.69, | (0.05,  | 0.016  |
|                        | 184.98)  | 184.67)  | 0.06)   |        | ,        | ,        | 0.10)   |        | ,        | ,        | 0.38)   |        | 20.47)  | 20.75)  | 0.44)   |        |
|                        |          |          |         |        | 2505.73) | 2551.08) |         |        | 1203.65) | 1270.66) |         |        |         |         |         |        |
|                        | 166.46   | 181.24   | 0.30    |        | 2419.70  | 2544.27  | 0.17    |        | 942.66   | 1342.09  | 1.28    |        | 13.32   | 19.94   | 1.48    |        |
| Zimbabwe               | (160.44, | (176.32, | (0.28,  | <0.001 | (2396.53 | (2525.71 | (0.15,  | <0.001 | (928.11, | (1328.55 | 1.28    |        | (11.61, | (18.30, | (0.98,  | <0.001 |
|                        | 172.67)  | 186.27)  | 0.32)   |        | ,        | ,        | 0.20)   |        | 957.41)  | ,        | 1.73)   |        | 15.23)  | 21.69)  | 1.98)   |        |
|                        |          |          |         |        | 2443.05) | 2562.94) |         |        |          | 1355.73) |         |        |         |         |         |        |
| <b>Rheumatic heart</b> |          |          |         |        |          |          |         |        |          |          |         |        |         |         |         |        |
| <b>disease</b>         |          |          |         |        |          |          |         |        |          |          |         |        |         |         |         |        |
| <b>Overall</b>         |          |          |         |        |          |          |         |        |          |          |         |        |         |         |         |        |
|                        | 56.67    | 57.57    | 0.06    |        | 741.71   | 755.99   | 0.07    |        | 329.89   | 154.80   | -2.49   |        | 4.98    | 2.03    | -2.95   |        |
| Afghanistan            | (54.18,  | (56.35,  | (0.04,  | <0.001 | (732.14, | (751.35, | (0.05,  | <0.001 | (323.35, | (152.64, | (-2.70, | <0.001 | (4.19,  | (1.78,  | (-3.18, | <0.001 |
|                        | 59.27)   | 58.81)   | 0.08)   |        | 751.40)  | 760.65)  | 0.09)   |        | 336.53)  | 156.99)  | -2.27)  |        | 5.89)   | 2.30)   | -2.72)  |        |
|                        |          |          |         |        | 1080.11  | 1065.60  | -0.04   |        | 112.94   | 67.35    | -1.81   |        | 1.03    | 0.27    | -4.51   |        |
| Albania                | (52.25,  | (48.65,  | (-0.20, | <0.001 | (1062.95 | (1045.12 | (-0.05, | <0.001 | (107.42, | (62.28,  | (-2.02, | <0.001 | (0.56,  | (0.05,  | (-5.35, | <0.001 |
|                        | 60.07)   | 57.99)   | -0.16)  |        | ,        | ,        | -0.04)  |        | 118.69)  | 72.74)   | -1.60)  |        | 1.75)   | 0.87)   | -3.67)  |        |
|                        |          |          |         |        | 1097.49) | 1086.38) |         |        |          |          |         |        |         |         |         |        |
|                        | 34.50    | 35.00    | 0.04    |        | 501.71   | 566.86   | 0.44    |        | 111.20   | 45.91    | -3.02   |        | 1.45    | 0.32    | -5.06   |        |
| Algeria                | (33.36,  | (34.10,  | (0.03,  | <0.001 | (497.17, | (563.31, | (0.40,  | <0.001 | (109.06, | (44.90,  | (-3.18, | <0.001 | (1.22,  | (0.24,  | (-5.22, | <0.001 |
|                        | 35.67)   | 35.92)   | 0.06)   |        | 506.28)  | 570.44)  | 0.48)   |        | 113.37)  | 46.93)   | -2.85)  |        | 1.73)   | 0.41)   | -4.90)  |        |

|                     |         |         |         |        |          |          |         |        |          |          |         |        |        |        |         |        |
|---------------------|---------|---------|---------|--------|----------|----------|---------|--------|----------|----------|---------|--------|--------|--------|---------|--------|
|                     | 36.92   | 38.51   | 0.14    |        | 865.33   | 889.17   | 0.09    |        | 295.33   | 240.83   | -0.76   |        | 4.23   | 3.31   | -0.92   |        |
| American Samoa      | (15.27, | (16.46, | (0.13,  | <0.001 | (740.66, | (763.64, | (0.09,  | <0.001 | (223.79, | (176.65, | (-0.87, | <0.001 | (0.05, | (0.01, | (-1.07, | <0.001 |
|                     | 77.18)  | 79.00)  | 0.16)   |        | 1006.47) | 1031.04) | 0.10)   |        | 383.97)  | 322.24)  | -0.64)  |        | 30.62) | 29.19) | -0.77)  |        |
|                     | 0.39    | 0.35    | -0.32   |        | 7.09     | 6.75     | -0.17   |        | 6.68     | 3.65     | -2.05   |        | 0.11   | 0.06   | -2.01   |        |
| Andorra             | (0.00,  | (0.00,  | (-0.46, | <0.001 | (0.69,   | (0.62,   | (-0.19, | <0.001 | (0.63,   | (0.09,   | (-2.20, | <0.001 | (0.00, | (0.00, | (-2.44, | <0.001 |
|                     | 21.07)  | 19.83)  | -0.18)  |        | 31.58)   | 30.09)   | -0.14)  |        | 30.76)   | 25.07)   | -1.90)  |        | 20.61) | 19.36) | -1.58)  |        |
|                     | 98.37   | 97.41   | -0.03   |        | 1791.02  | 1830.05  | 0.08    |        | 204.92   | 127.66   | -1.58   |        | 1.97   | 0.67   | -3.57   |        |
| Angola              | (95.34, | (95.63, | (-0.05, | 0.001  | (1777.67 | (1822.02 | (0.06,  | <0.001 | (200.41, | (125.55, | (-1.89, | <0.001 | (1.55, | (0.52, | (-4.36, | <0.001 |
|                     | 101.48) | 99.23)  | -0.01)  |        | ,        | ,        | 0.09)   |        | (209.51) | (129.81) | -1.26)  |        | (2.49) | (0.85) | (-2.78) |        |
|                     | 62.28   | 60.71   | -0.09   |        | 1257.02  | 1246.98  | -0.03   |        | 140.97   | 87.31    | -1.63   |        | 1.36   | 0.46   | -3.65   |        |
| Antigua and Barbuda | (35.77, | (37.36, | (-0.10, | <0.001 | (1123.39 | (1132.19 | (-0.03, | <0.001 | (98.63,  | (59.03,  | (-2.09, | <0.001 | (0.00, | (0.00, | (-4.53, | <0.001 |
|                     | 101.80) | 93.60)  | -0.07)  |        | ,        | ,        | -0.02)  |        | 196.09)  | 124.86)  | -1.17)  |        | 19.09) | 12.68) | -2.77)  |        |
|                     | 50.87   | 51.04   | 0.01    |        | 973.79   | 997.21   | 0.08    |        | 88.47    | 58.38    | -1.44   |        | 0.72   | 0.18   | -4.58   |        |
| Argentina           | (49.62, | (49.98, | (0.00,  | 0.055  | (968.25, | (992.53, | (0.07,  | <0.001 | (86.81,  | (57.25,  | (-1.56, | <0.001 | (0.57, | (0.13, | (-5.20, | <0.001 |
|                     | 52.15)  | 52.12)  | 0.02)   |        | 979.35)  | 1001.91) | 0.10)   |        | 90.16)   | 59.52)   | -1.32)  |        | 0.89)  | 0.26)  | -3.96)  |        |
|                     | 60.03   | 56.01   | -0.24   |        | 1210.78  | 1152.55  | -0.17   |        | 182.71   | 89.08    | -2.53   |        | 2.16   | 0.58   | -4.45   |        |
| Armenia             | (56.05, | (51.42, | (-0.26, | <0.001 | (1192.82 | (1132.37 | (-0.20, | <0.001 | (175.77, | (83.59,  | (-2.86, | <0.001 | (1.46, | (0.23, | (-5.82, | <0.001 |
|                     | 64.23)  | 60.94)  | -0.22)  |        | ,        | ,        | -0.14)  |        | 189.85)  | 94.88)   | -2.21)  |        | 3.07)  | 1.30)  | -3.05)  |        |
|                     | 1.05    | 0.94    | -0.33   |        | 23.40    | 23.05    | -0.04   |        | 19.50    | 9.58     | -2.40   |        | 0.31   | 0.14   | -2.61   |        |
| Australia           | (0.82,  | (0.75,  | (-0.50, | <0.001 | (22.26,  | (22.03,  | (-0.11, | 0.352  | (18.47,  | (8.94,   | (-2.97, | <0.001 | (0.19, | (0.07, | (-3.39, | <0.001 |
|                     | 1.32)   | 1.18)   | -0.17)  |        | 24.58)   | 24.11)   | 0.04)   |        | 20.58)   | 10.26)   | -1.84)  |        | 0.47)  | 0.25)  | -1.81)  |        |
|                     | 1.11    | 0.45    | -3.04   |        | 15.39    | 7.31     | -2.59   |        | 9.11     | 3.84     | -3.01   |        | 0.14   | 0.06   | -3.14   |        |
| Austria             | (0.77,  | (0.24,  | (-3.32, | <0.001 | (14.01,  | (6.35,   | (-2.74, | <0.001 | (8.06,   | (3.16,   | (-3.59, | <0.001 | (0.04, | (0.01, | (-3.53, | <0.001 |
|                     | 1.57)   | 0.78)   | -2.76)  |        | 16.88)   | 8.40)    | -2.44)  |        | 10.27)   | 4.64)    | -2.43)  |        | 0.37)  | 0.27)  | -2.74)  |        |
|                     | 58.44   | 56.49   | -0.12   |        | 1088.74  | 1067.26  | -0.07   |        | 192.44   | 101.99   | -2.34   |        | 2.36   | 0.84   | -3.71   |        |
| Azerbaijan          | (55.82, | (54.15, | (-0.14, | <0.001 | (1077.18 | (1057.39 | (-0.08, | <0.001 | (187.57, | (98.95,  | (-2.91, | <0.001 | (1.85, | (0.59, | (-4.54, | <0.001 |
|                     | 61.16)  | 58.91)  | -0.10)  |        | ,        | ,        | -0.06)  |        | 197.42)  | 105.12)  | -1.77)  |        | 2.99)  | 1.18)  | -2.86)  |        |
|                     | 65.98   | 66.07   | 0.01    |        | 1239.51  | 1242.09  | 0.01    |        | 133.18   | 99.80    | -0.96   |        | 1.26   | 0.69   | -2.01   |        |
| Bahamas             | (52.25, | (53.61, | (-0.04, | 0.799  | (1176.37 | (1186.29 | (-0.00, | 0.123  | (112.87, | (84.48,  | (-1.25, | <0.001 | (0.08, | (0.02, | (-2.63, | <0.001 |

|            |         |         |         |        |           |           |         |        |          |          |         |        |        |        |         |        |
|------------|---------|---------|---------|--------|-----------|-----------|---------|--------|----------|----------|---------|--------|--------|--------|---------|--------|
|            | 82.49)  | 80.60)  | 0.05)   |        | ,         | ,         | 0.02)   |        | 156.31)  | 117.16)  | -0.68)  |        | 6.05)  | 3.89)  | -1.38)  |        |
|            |         |         |         |        | 1305.37)  | 1299.88)  |         |        |          |          |         |        |        |        |         |        |
|            | 0.94    | 0.82    | -0.48   |        | 16.96     | 14.78     | -0.47   |        | 30.87    | 12.17    | -3.20   |        | 0.47   | 0.18   | -3.27   |        |
| Bahrain    | (0.14,  | (0.26,  | (-0.61, | <0.001 | (12.23,   | (11.74,   | (-0.58, | <0.001 | (24.04,  | (9.29,   | (-3.78, | <0.001 | (0.02, | (0.00, | (-3.95, | <0.001 |
|            | 3.59)   | 2.14)   | -0.35)  |        | 23.18)    | 18.47)    | -0.35)  |        | 39.23)   | 15.75)   | -2.62)  |        | 2.94)  | 1.26)  | -2.59)  |        |
|            | 69.28   | 64.58   | -0.25   |        | 845.63    | 864.67    | 0.07    |        | 225.70   | 118.15   | -2.17   |        | 3.00   | 1.25   | -2.84   |        |
| Bangladesh | (68.51, | (63.98, | (-0.26, | <0.001 | (842.77,  | (862.45,  | (0.06,  | <0.001 | (224.25, | (117.33, | (-2.70, | <0.001 | (2.83, | (1.16, | (-3.55, | <0.001 |
|            | 70.07)  | 65.19)  | -0.23)  |        | 848.50)   | 866.90)   | 0.09)   |        | 227.15)  | 118.97)  | -1.64)  |        | 3.17)  | 1.34)  | -2.12)  |        |
|            | 63.75   | 63.44   | -0.02   |        | 1248.99   | 1259.76   | 0.03    |        | 131.33   | 91.87    | -1.23   |        | 1.20   | 0.53   | -2.79   |        |
| Barbados   | (49.61, | (48.51, | (-0.04, | 0.150  | (1183.61, | (1190.71, | (0.02,  | <0.001 | (110.71, | (73.98,  | (-1.51, | <0.001 | (0.06, | (0.00, | (-3.49, | <0.001 |
|            | 80.73)  | 81.58)  | 0.01)   |        | ,         | ,         | 0.04)   |        | 154.74)  | 112.89)  | -0.94)  |        | 5.73)  | 5.04)  | -2.09)  |        |
|            | 6.15    | 2.93    | -2.54   |        | 37.54     | 25.11     | -1.37   |        | 110.73   | 20.08    | -5.71   |        | 1.92   | 0.33   | -5.86   |        |
| Belarus    | (5.42,  | (2.40,  | (-2.66, | <0.001 | (35.69,   | (23.41,   | (-1.46, | <0.001 | (107.55, | (18.60,  | (-6.79, | <0.001 | (1.52, | (0.17, | (-7.06, | <0.001 |
|            | 6.95)   | 3.58)   | -2.43)  |        | 39.46)    | 26.93)    | -1.28)  |        | 113.99)  | 21.66)   | -4.62)  |        | 2.39)  | 0.62)  | -4.65)  |        |
|            | 0.44    | 0.43    | -0.16   |        | 8.01      | 8.16      | 0.02    |        | 3.84     | 2.61     | -1.33   |        | 0.06   | 0.04   | -1.23   |        |
| Belgium    | (0.26,  | (0.25,  | (-0.50, | 0.366  | (7.12,    | (7.25,    | (-0.07, | 0.663  | (3.24,   | (2.11,   | (-1.69, | <0.001 | (0.01, | (0.00, | (-1.74, | <0.001 |
|            | 0.72)   | 0.71)   | 0.18)   |        | 8.97)     | 9.17)     | 0.11)   |        | 4.52)    | 3.20)    | -0.98)  |        | 0.21)  | 0.19)  | -0.72)  |        |
|            | 71.03   | 69.18   | -0.08   |        | 1230.60   | 1241.17   | 0.03    |        | 123.11   | 104.22   | -0.57   |        | 1.06   | 0.75   | -1.27   |        |
| Belize     | (53.26, | (57.67, | (-0.11, | <0.001 | (1149.13, | (1189.69, | (0.02,  | <0.001 | (98.26,  | (89.64,  | (-0.83, | <0.001 | (0.01, | (0.04, | (-1.77, | <0.001 |
|            | 93.72)  | 82.44)  | -0.06)  |        | ,         | ,         | 0.04)   |        | 153.02)  | 120.58)  | -0.32)  |        | 9.12)  | 3.70)  | -0.78)  |        |
|            | 73.86   | 75.62   | 0.08    |        | 1183.46   | 1232.91   | 0.14    |        | 140.65   | 95.64    | -1.32   |        | 1.37   | 0.60   | -2.80   |        |
| Benin      | (69.87, | (73.23, | (0.07,  | <0.001 | (1166.91, | (1222.86, | (0.13,  | <0.001 | (135.01, | (92.86,  | (-1.38, | <0.001 | (0.86, | (0.40, | (-2.92, | <0.001 |
|            | 78.03)  | 78.09)  | 0.09)   |        | ,         | ,         | 0.15)   |        | 146.49)  | 98.48)   | -1.26)  |        | 2.09)  | 0.88)  | -2.67)  |        |
|            | 1.46    | 0.82    | -1.98   |        | 1200.20)  | 1243.03)  |         |        |          |          |         |        |        |        |         |        |
| Bermuda    | (0.00,  | (0.00,  | (-2.14, | <0.001 | 25.88     | 17.51     | -1.36   |        | 49.53    | 12.76    | -4.91   |        | 0.80   | 0.19   | -5.16   |        |
|            | 22.57)  | 27.60)  | -1.82)  |        | (10.14,   | (3.83,    | (-1.43, | <0.001 | (26.05,  | (1.87,   | (-5.28, | <0.001 | (0.00, | (0.00, | (-5.64, | <0.001 |
|            | 67.65   | 64.04   | -0.18   |        | 57.35)    | 53.46)    | -1.29)  |        | 88.09)   | 46.65)   | -4.54)  |        | 21.52) | 26.54) | -4.67)  |        |
|            | 58.09,  | 55.94,  | (-0.22, | <0.001 | 892.11    | 881.77    | -0.04   |        | 509.42   | 214.44   | -2.95   |        | 7.90   | 2.89   | -3.40   |        |
| Bhutan     | (58.09, | (55.94, | (-0.22, | <0.001 | (854.38,  | (851.03,  | (-0.06, | <0.001 | (480.59, | (199.38, | (-3.17, | <0.001 | (4.65, | (1.39, | (-3.63, | <0.001 |
|            | 78.55)  | 73.01)  | -0.14)  |        | 931.24)   | 913.36)   | -0.02)  |        | 539.67)  | 230.37)  | -2.72)  |        | 12.74) | 5.34)  | -3.17)  |        |
| Bolivia    | 73.21   | 72.59   | -0.03   | 0.067  | 1196.59   | 1214.59   | 0.05    | <0.001 | 170.42   | 85.74    | -2.34   | <0.001 | 1.92   | 0.47   | -4.75   | <0.001 |

|                             |                               |                               |                            |        |                                       |                                       |                            |        |                               |                               |                            |        |                         |                         |                            |        |
|-----------------------------|-------------------------------|-------------------------------|----------------------------|--------|---------------------------------------|---------------------------------------|----------------------------|--------|-------------------------------|-------------------------------|----------------------------|--------|-------------------------|-------------------------|----------------------------|--------|
| (Plurinational<br>State of) | (69.91,<br>76.63)             | (70.22,<br>75.02)             | (-0.06,<br>0.00)           |        | (1182.76,<br>1210.56)                 | (1204.77,<br>1224.48)                 | (0.04,<br>0.06)            |        | (165.18,<br>175.80)           | (83.14,<br>88.41)             | (-2.43,<br>-2.26)          |        | (1.39,<br>2.58)         | (0.30,<br>0.71)         | (-4.85,<br>-4.65)          |        |
| Bosnia and<br>Herzegovina   | 1.03<br>(0.63,<br>1.59)       | 1.20<br>(0.65,<br>2.07)       | 0.61<br>(0.43,<br>0.80)    | <0.001 | 8.13<br>(6.92,<br>9.51)               | 9.70<br>(7.94,<br>11.77)              | 0.64<br>(0.34,<br>0.94)    | <0.001 | 15.49<br>(13.79,<br>17.34)    | 4.35<br>(3.19,<br>5.83)       | -4.33<br>(-4.86,<br>-3.79) | <0.001 | 0.26<br>(0.08,<br>0.61) | 0.06<br>(0.00,<br>0.54) | -4.67<br>(-5.67,<br>-3.66) | <0.001 |
| Botswana                    | 96.77<br>(88.55,<br>105.63)   | 93.40<br>(87.59,<br>99.50)    | -0.12<br>(-0.13,<br>-0.11) | <0.001 | 1609.13<br>(1573.76,<br>,<br>1645.17) | 1602.68<br>(1578.57,<br>,<br>1627.08) | -0.01<br>(-0.02,<br>-0.00) | 0.026  | 215.60<br>(202.63,<br>229.26) | 125.50<br>(118.82,<br>132.47) | -1.86<br>(-2.08,<br>-1.65) | <0.001 | 2.32<br>(1.14,<br>4.29) | 0.82<br>(0.37,<br>1.58) | -3.53<br>(-3.95,<br>-3.11) | <0.001 |
| Brazil                      | 74.56<br>(73.89,<br>75.23)    | 74.41<br>(73.82,<br>75.00)    | -0.00<br>(-0.01,<br>0.01)  | 0.620  | 1358.25<br>(1355.35,<br>,<br>1361.16) | 1377.48<br>(1374.99,<br>,<br>1379.96) | 0.05<br>(0.04,<br>0.05)    | <0.001 | 152.86<br>(151.89,<br>153.84) | 90.44<br>(89.80,<br>91.07)    | -1.79<br>(-1.93,<br>-1.66) | <0.001 | 1.47<br>(1.37,<br>1.57) | 0.42<br>(0.38,<br>0.47) | -4.23<br>(-4.50,<br>-3.96) | <0.001 |
| Brunei Darussalam           | 1.43<br>(0.14,<br>5.79)       | 0.82<br>(0.08,<br>3.56)       | -1.96<br>(-2.17,<br>-1.74) | <0.001 | 21.24<br>(13.87,<br>31.24)            | 14.22<br>(9.52,<br>20.58)             | -1.41<br>(-1.57,<br>-1.24) | <0.001 | 50.21<br>(38.49,<br>64.49)    | 19.83<br>(14.24,<br>27.04)    | -3.16<br>(-3.56,<br>-2.76) | <0.001 | 0.83<br>(0.02,<br>4.79) | 0.33<br>(0.00,<br>2.78) | -3.15<br>(-3.54,<br>-2.76) | <0.001 |
| Bulgaria                    | 2.94<br>(2.37,<br>3.61)       | 1.37<br>(0.93,<br>1.98)       | -2.61<br>(-2.69,<br>-2.54) | <0.001 | 17.98<br>(16.52,<br>19.55)            | 10.95<br>(9.58,<br>12.48)             | -1.72<br>(-1.86,<br>-1.59) | <0.001 | 111.46<br>(107.76,<br>115.25) | 28.41<br>(26.18,<br>30.80)    | -4.55<br>(-4.94,<br>-4.15) | <0.001 | 1.92<br>(1.47,<br>2.48) | 0.48<br>(0.24,<br>0.92) | -4.60<br>(-5.00,<br>-4.19) | <0.001 |
| Burkina Faso                | 77.36<br>(74.35,<br>80.47)    | 77.32<br>(75.48,<br>79.20)    | -0.01<br>(-0.02,<br>0.01)  | 0.419  | 1178.38<br>(1166.16,<br>,<br>1190.71) | 1195.46<br>(1188.00,<br>,<br>1202.96) | 0.05<br>(0.05,<br>0.05)    | <0.001 | 108.56<br>(104.90,<br>112.32) | 91.71<br>(89.67,<br>93.80)    | -0.56<br>(-0.65,<br>-0.48) | <0.001 | 0.85<br>(0.56,<br>1.26) | 0.56<br>(0.41,<br>0.75) | -1.38<br>(-1.63,<br>-1.13) | <0.001 |
| Burundi                     | 113.89<br>(109.41,<br>118.52) | 119.65<br>(116.58,<br>122.79) | 0.17<br>(0.15,<br>0.19)    | <0.001 | 1831.74<br>(1813.17,<br>,<br>1850.48) | 1919.27<br>(1906.51,<br>,<br>1932.10) | 0.16<br>(0.14,<br>0.18)    | <0.001 | 249.85<br>(243.10,<br>256.77) | 154.53<br>(150.96,<br>158.18) | -1.65<br>(-1.73,<br>-1.57) | <0.001 | 2.59<br>(1.94,<br>3.41) | 1.01<br>(0.74,<br>1.35) | -3.21<br>(-3.34,<br>-3.08) | <0.001 |
| Cabo Verde                  | 67.25<br>(53.94,<br>83.61)    | 65.19<br>(55.48,<br>76.15)    | -0.11<br>(-0.12,<br>-0.10) | <0.001 | 1296.24<br>(1232.25,<br>,<br>1363.21) | 1301.50<br>(1257.03,<br>,<br>1347.17) | 0.01<br>(0.01,<br>0.02)    | <0.001 | 200.41<br>(175.66,<br>228.24) | 75.74<br>(65.30,<br>87.42)    | -3.33<br>(-3.48,<br>-3.19) | <0.001 | 2.28<br>(0.40,<br>8.32) | 0.22<br>(0.00,<br>2.02) | -7.86<br>(-8.48,<br>-7.24) | <0.001 |
| Cambodia                    | 45.03                         | 42.89                         | -0.17                      | <0.001 | 639.25                                | 630.02                                | -0.08                      | 0.014  | 347.96                        | 131.40                        | -3.28                      | <0.001 | 5.32                    | 1.69                    | -3.85                      | <0.001 |

|                             |          |          |         |        |          |          |         |        |          |          |         |        |        |         |         |        |
|-----------------------------|----------|----------|---------|--------|----------|----------|---------|--------|----------|----------|---------|--------|--------|---------|---------|--------|
|                             | (42.94,  | (41.38,  | (-0.19, |        | (631.14, | (624.19, | (-0.14, |        | (341.90, | (128.74, | (-3.42, | (4.59, | (1.40, | (-4.00, |         |        |
|                             | 47.21)   | 44.45)   | -0.15)  |        | 647.46)  | 635.88)  | -0.02)  |        | 354.11)  | 134.10)  | -3.13)  | 6.15)  | 2.02)  | -3.70)  |         |        |
|                             |          |          |         |        | 1143.72  | 1231.00  |         |        |          |          |         |        |        |         |         |        |
|                             | 72.32    | 77.43    | 0.23    |        | (1132.74 | (1224.66 | 0.26    |        | 122.70   | 88.20    | -1.14   | 1.12   | 0.48   | -2.87   |         |        |
| Cameroon                    | (69.66,  | (75.89,  | (0.21,  | <0.001 | ,        | ,        | (0.24,  | <0.001 | (119.13, | (86.52,  | (-1.19, | <0.001 | (0.80, | (0.36,  | (-3.06, | <0.001 |
|                             | 75.06)   | 79.01)   | 0.26)   |        | 1154.78) | 1237.36) | 0.27)   |        | 126.36)  | 89.92)   | -1.10)  | 1.54)  | 0.63)  | -2.68)  |         |        |
|                             | 1.72     | 1.50     | -0.46   |        | 28.52    | 27.13    | -0.17   |        | 9.03     | 5.44     | -1.70   | 0.12   | 0.07   | -1.91   |         |        |
| Canada                      | (1.49,   | (1.29,   | (-0.53, | <0.001 | (27.55,  | (26.20,  | (-0.21, | <0.001 | (8.49,   | (5.04,   | (-1.94, | <0.001 | (0.07, | (0.03,  | (-2.86, | <0.001 |
|                             | 1.98)    | 1.74)    | -0.39)  |        | 29.52)   | 28.09)   | -0.14)  |        | 9.60)    | 5.88)    | -1.45)  | 0.21)  | 0.14)  | -0.96)  |         |        |
|                             | 112.67   | 117.45   | 0.14    |        | 1866.14  | 1932.35  | 0.12    |        | 247.74   | 191.47   | -0.88   | 2.62   | 1.65   | -1.55   |         |        |
| Central African<br>Republic | (106.42, | (112.94, | (0.13,  | <0.001 | (1839.71 | (1913.34 | (0.10,  | <0.001 | (238.10, | (185.50, | (-1.00, | <0.001 | (1.70, | (1.13,  | (-1.76, | <0.001 |
|                             | 119.24)  | 122.12)  | 0.16)   |        | ,        | ,        | 0.14)   |        | 257.70)  | 197.60)  | -0.75)  | 3.90)  | 2.33)  | -1.35)  |         |        |
|                             | 76.88    | 76.55    | -0.01   |        | 1174.85  | 1194.42  | 0.06    |        | 149.06   | 107.73   | -1.08   | 1.51   | 0.82   | -2.04   |         |        |
| Chad                        | (73.19,  | (74.32,  | (-0.03, | 0.122  | (1159.88 | (1185.18 | (0.05,  | <0.001 | (143.79, | (104.99, | (-1.20, | <0.001 | (1.02, | (0.60,  | (-2.24, | <0.001 |
|                             | 80.71)   | 78.84)   | 0.00)   |        | ,        | ,        | 0.06)   |        | 154.48)  | 110.53)  | -0.96)  | 2.17)  | 1.12)  | -1.83)  |         |        |
|                             | 2.89     | 1.65     | -1.93   |        | 31.33    | 24.38    | -0.88   |        | 70.63    | 11.96    | -5.89   | 1.19   | 0.18   | -6.26   |         |        |
| Chile                       | (2.45,   | (1.36,   | (-2.08, | <0.001 | (29.87,  | (23.23,  | (-1.00, | <0.001 | (68.43,  | (11.15,  | (-6.18, | <0.001 | (0.92, | (0.09,  | (-6.59, | <0.001 |
|                             | 3.38)    | 1.99)    | -1.77)  |        | 32.84)   | 25.58)   | -0.77)  |        | 72.89)   | 12.80)   | -5.59)  | 1.52)  | 0.32)  | -5.93)  |         |        |
|                             | 34.20    | 28.71    | -0.62   |        | 625.60   | 513.66   | -0.68   |        | 170.31   | 42.06    | -4.72   | 2.42   | 0.29   | -7.13   |         |        |
| China                       | (34.05,  | (28.55,  | (-0.66, | <0.001 | (624.93, | (513.01, | (-0.71, | <0.001 | (169.96, | (41.87,  | (-5.12, | <0.001 | (2.38, | (0.28,  | (-7.59, | <0.001 |
|                             | 34.36)   | 28.87)   | -0.57)  |        | 626.26)  | 514.30)  | -0.65)  |        | 170.67)  | 42.24)   | -4.33)  | 2.46)  | 0.31)  | -6.67)  |         |        |
|                             | 1.56     | 1.31     | -0.59   |        | 22.66    | 20.74    | -0.31   |        | 46.90    | 7.16     | -6.22   | 0.77   | 0.10   | -6.62   |         |        |
| Colombia                    | (1.35,   | (1.15,   | (-0.87, | <0.001 | (21.86,  | (20.10,  | (-0.37, | <0.001 | (45.75,  | (6.79,   | (-7.03, | <0.001 | (0.63, | (0.06,  | (-7.54, | <0.001 |
|                             | 1.79)    | 1.48)    | -0.32)  |        | 23.48)   | 21.39)   | -0.24)  |        | 48.08)   | 7.55)    | -5.42)  | 0.94)  | 0.16)  | -5.69)  |         |        |
|                             | 101.32   | 105.81   | 0.15    |        | 1835.41  | 1902.86  | 0.13    |        | 175.18   | 124.72   | -1.18   | 1.42   | 0.55   | -3.25   |         |        |
| Comoros                     | (87.10,  | (94.57,  | (0.14,  | <0.001 | (1769.87 | (1853.30 | (0.10,  | <0.001 | (155.53, | (112.30, | (-2.25, | 0.032  | (0.21, | (0.05,  | (-6.64, | 0.070  |
|                             | 117.54)  | 118.08)  | 0.16)   |        | ,        | ,        | 0.16)   |        | 196.92)  | 138.19)  | -0.10)  | 5.35)  | 2.37)  | 0.27)   |         |        |
|                             | 101.73   | 103.22   | 0.06    |        | 1864.54  | 1892.72  | 0.03    |        | 187.67   | 121.71   | -1.42   | 1.65   | 0.53   | -3.92   |         |        |
| Congo                       | (95.50,  | (98.96,  | (0.04,  | <0.001 | (1836.52 | (1874.15 | (-0.06, | 0.484  | (178.78, | (117.04, | (-1.66, | <0.001 | (0.90, | (0.27,  | (-4.73, | <0.001 |
|                             | 108.32)  | 107.62)  | 0.08)   |        | ,        | ,        | 0.12)   |        | 196.93)  | 126.53)  | -1.18)  | 2.82)  | 0.95)  | -3.11)  |         |        |

|                   |          |          |         |        |          |          |         |        |          |          |         |        |        |        |         |        |
|-------------------|----------|----------|---------|--------|----------|----------|---------|--------|----------|----------|---------|--------|--------|--------|---------|--------|
|                   |          |          |         |        | 1892.91) | 1911.42) |         |        |          |          |         |        |        |        |         |        |
|                   | 5.01     | 4.54     | -0.32   |        | 75.06    | 79.30    | 0.21    |        | 168.82   | 82.25    | -2.48   |        | 2.73   | 1.30   | -2.56   |        |
| Cook Islands      | (0.00,   | (0.00,   | (-0.48, | <0.001 | (26.27,  | (24.33,  | (0.11,  | <0.001 | (88.23,  | (25.90,  | (-2.75, | <0.001 | (0.00, | (0.00, | (-2.86, | <0.001 |
|                   | 69.63)   | 75.50)   | -0.16)  |        | 173.78)  | 192.71)  | 0.30)   |        | 297.11)  | 196.96)  | -2.21)  |        | 65.50) | 69.17) | -2.25)  |        |
|                   | 66.13    | 63.53    | -0.14   |        | 1334.70  | 1317.37  | -0.05   |        | 124.06   | 89.45    | -1.05   |        | 1.03   | 0.45   | -2.64   |        |
| Costa Rica        | (61.80,  | (59.96,  | (-0.15, | <0.001 | (1314.65 | (1301.18 | (-0.07, | <0.001 | (117.97, | (85.28,  | (-1.36, | <0.001 | (0.54, | (0.20, | (-3.28, | <0.001 |
|                   | 70.71)   | 67.27)   | -0.12)  |        | ,        | ,        | -0.03)  |        | 130.41)  | 93.78)   | -0.73)  |        | 1.79)  | 0.88)  | -2.00)  |        |
|                   |          |          |         |        | 1355.00) | 1333.73) |         |        |          |          |         |        |        |        |         |        |
|                   | 77.27    | 79.04    | 0.08    |        | 1215.98  | 1245.76  | 0.09    |        | 130.94   | 91.10    | -1.22   |        | 1.18   | 0.51   | -2.80   |        |
| Cote d'Ivoire     | (74.80,  | (77.38,  | (0.06,  | <0.001 | (1205.88 | (1239.07 | (0.08,  | <0.001 | (127.67, | (89.30,  | (-1.31, | <0.001 | (0.89, | (0.39, | (-3.02, | <0.001 |
|                   | 79.80)   | 80.72)   | 0.09)   |        | ,        | ,        | 0.10)   |        | 134.29)  | 92.93)   | -1.13)  |        | 1.55)  | 0.67)  | -2.58)  |        |
|                   |          |          |         |        | 1226.16) | 1252.48) |         |        |          |          |         |        |        |        |         |        |
|                   | 0.90     | 0.72     | -0.77   |        | 6.89     | 5.96     | -0.54   |        | 17.92    | 3.84     | -5.25   |        | 0.30   | 0.06   | -5.48   |        |
| Croatia           | (0.53,   | (0.35,   | (-1.32, | 0.007  | (5.76,   | (4.74,   | (-0.63, | <0.001 | (16.06,  | (2.87,   | (-6.13, | <0.001 | (0.11, | (0.00, | (-7.17, | <0.001 |
|                   | 1.45)    | 1.37)    | -0.21)  |        | 8.19)    | 7.44)    | -0.44)  |        | 19.95)   | 5.07)    | -4.37)  |        | 0.69)  | 0.48)  | -3.76)  |        |
|                   |          |          |         |        | 1253.73  | 1262.87  | 0.03    |        | 174.04   | 92.55    | -2.15   |        | 1.94   | 0.55   | -4.26   |        |
| Cuba              | (60.83,  | (60.44,  | (-0.02, | 0.871  | (1243.65 | (1251.32 | (0.02,  | <0.001 | (170.25, | (89.45,  | (-2.47, | <0.001 | (1.55, | (0.34, | (-4.86, | <0.001 |
|                   | 65.28)   | 65.74)   | 0.02)   |        | ,        | ,        | 0.03)   |        | 177.90)  | 95.73)   | -1.83)  |        | 2.39)  | 0.85)  | -3.65)  |        |
|                   |          |          |         |        | 1263.88) | 1274.51) |         |        |          |          |         |        |        |        |         |        |
|                   | 0.40     | 0.32     | -0.79   |        | 5.58     | 5.20     | -0.25   |        | 6.25     | 2.41     | -3.27   |        | 0.10   | 0.04   | -3.42   |        |
| Cyprus            | (0.02,   | (0.03,   | (-1.07, | <0.001 | (3.26,   | (3.37,   | (-0.30, | <0.001 | (3.79,   | (1.25,   | (-3.80, | <0.001 | (0.00, | (0.00, | (-4.25, | <0.001 |
|                   | 2.02)    | 1.68)    | -0.51)  |        | 8.97)    | 7.88)    | -0.20)  |        | 9.78)    | 4.46)    | -2.73)  |        | 1.52)  | 1.29)  | -2.58)  |        |
|                   | 1.23     | 1.04     | -0.63   |        | 8.92     | 8.39     | -0.25   |        | 27.46    | 5.71     | -5.20   |        | 0.47   | 0.09   | -5.36   |        |
| Czechia           | (0.91,   | (0.73,   | (-0.85, | <0.001 | (8.00,   | (7.43,   | (-0.37, | <0.001 | (25.83,  | (4.93,   | (-5.54, | <0.001 | (0.28, | (0.02, | (-5.91, | <0.001 |
|                   | 1.64)    | 1.46)    | -0.41)  |        | 9.91)    | 9.47)    | -0.14)  |        | 29.18)   | 6.59)    | -4.87)  |        | 0.75)  | 0.30)  | -4.81)  |        |
| Democratic        | 36.70    | 38.16    | 0.13    |        | 591.25   | 595.38   | 0.03    |        | 146.12   | 98.67    | -1.33   |        | 2.00   | 1.19   | -1.76   |        |
| People's Republic | (35.41,  | (36.94,  | (0.11,  | <0.001 | (585.97, | (590.61, | (0.02,  | <0.001 | (143.47, | (96.75,  | (-1.39, | <0.001 | (1.70, | (0.99, | (-1.84, | <0.001 |
| of Korea          | 38.04)   | 39.40)   | 0.15)   |        | 596.56)  | 600.18)  | 0.03)   |        | 148.81)  | 100.63)  | -1.26)  |        | 2.35)  | 1.42)  | -1.68)  |        |
|                   |          |          |         |        | 1859.53  | 1885.65  | 0.05    |        | 187.18   | 136.44   | -1.08   |        | 1.64   | 0.78   | -2.50   |        |
| Democratic        | 103.92   | 107.36   | 0.11    |        | (1852.34 | (1881.04 | (0.03,  | <0.001 | (184.89, | (135.20, | (-1.14, | <0.001 | (1.43, | (0.68, | (-2.68, | <0.001 |
| Republic of the   | (102.28, | (106.30, | (0.09,  | <0.001 | ,        | ,        | 0.06)   |        | 189.49)  | 137.69)  | -1.02)  |        | 1.88)  | 0.88)  | -2.31)  |        |
| Congo             | 105.58)  | 108.43)  | 0.14)   |        | 1866.74) | 1890.28) |         |        |          |          |         |        |        |        |         |        |
| Denmark           | 0.33     | 0.26     | -0.74   | <0.001 | 4.98     | 4.59     | -0.29   | <0.001 | 6.40     | 1.46     | -4.97   | <0.001 | 0.11   | 0.02   | -5.73   | <0.001 |

|                       |                     |                     |                   |        |                            |                            |                        |        |                     |                     |                   |                 |                  |                   |                   |        |
|-----------------------|---------------------|---------------------|-------------------|--------|----------------------------|----------------------------|------------------------|--------|---------------------|---------------------|-------------------|-----------------|------------------|-------------------|-------------------|--------|
|                       | (0.12,<br>0.71)     | (0.08,<br>0.64)     | (-1.13,<br>-0.36) |        | (4.03,<br>6.09)            | (3.66,<br>5.70)            | (-0.33,<br>-0.26)      |        | (5.33,<br>7.64)     | (0.96,<br>2.14)     | (-6.00,<br>-3.94) | (0.01,<br>0.40) | (0.00,<br>0.27)  | (-8.45,<br>-2.92) |                   |        |
|                       | 97.41               | 101.85              | 0.15              |        | 1769.17                    | 1878.55                    | 0.21                   |        | 152.63              | 116.33              | -0.87             | 1.10            | 0.43             | -3.10             |                   |        |
| Djibouti              | (84.42,<br>112.09)  | (93.15,<br>111.15)  | (0.14,<br>0.17)   | <0.001 | (1709.83,<br>,<br>1830.23) | (1840.90,<br>,<br>1916.79) | (0.20,<br>,<br>0.21)   | <0.001 | (135.70,<br>171.31) | (107.09,<br>126.16) | (-1.11,<br>-0.63) | <0.001          | (0.14,<br>4.33)  | (0.06,<br>1.52)   | (-3.59,<br>-2.60) | <0.001 |
|                       | 71.75               | 70.42               | -0.06             |        | 1267.76                    | 1272.17                    | 0.01                   |        | 188.02              | 123.46              | -1.46             | 2.14            | 1.05             | -2.40             |                   |        |
| Dominica              | (44.70,<br>110.88)  | (41.87,<br>111.17)  | (-0.09,<br>-0.03) | <0.001 | (1139.29,<br>,<br>1407.77) | (1138.14,<br>,<br>1417.73) | (-0.01,<br>,<br>0.03)  | 0.548  | (140.23,<br>247.95) | (84.34,<br>174.61)  | (-1.73,<br>-1.19) | <0.001          | (0.00,<br>20.31) | (0.00,<br>16.75)  | (-2.85,<br>-1.94) | <0.001 |
|                       | 68.81               | 65.34               | -0.18             |        | 1215.65                    | 1205.15                    | -0.03                  |        | 154.14              | 106.58              | -1.25             | 1.57            | 0.81             | -2.24             |                   |        |
| Dominican<br>Republic | (65.95,<br>71.78)   | (63.01,<br>67.75)   | (-0.19,<br>-0.17) | <0.001 | (1203.08,<br>,<br>1228.33) | (1195.02,<br>,<br>1215.35) | (-0.04,<br>,<br>-0.02) | <0.001 | (149.70,<br>158.70) | (103.58,<br>109.64) | (-1.46,<br>-1.04) | <0.001          | (1.15,<br>2.11)  | (0.57,<br>1.12)   | (-2.61,<br>-1.87) | <0.001 |
|                       | 66.64               | 65.67               | -0.05             |        | 1177.78                    | 1178.76                    | 0.01                   |        | 125.12              | 76.09               | -1.74             | 1.15            | 0.33             | -4.29             |                   |        |
| Ecuador               | (64.21,<br>69.16)   | (63.83,<br>67.56)   | (-0.06,<br>-0.04) | <0.001 | (1167.15,<br>,<br>1188.49) | (1170.83,<br>,<br>1186.74) | (-0.01,<br>,<br>0.02)  | 0.568  | (121.65,<br>128.66) | (74.08,<br>78.14)   | (-2.00,<br>-1.49) | <0.001          | (0.83,<br>1.55)  | (0.21,<br>0.49)   | (-4.79,<br>-3.79) | <0.001 |
|                       | 47.17               | 48.80               | 0.12              |        | 810.21                     | 812.67                     | 0.01                   |        | 182.33              | 73.81               | -3.09             | 2.33            | 0.57             | -4.76             |                   |        |
| Egypt                 | (46.28,<br>48.09)   | (48.13,<br>49.48)   | (0.06,<br>0.18)   | <0.001 | (806.38,<br>814.05)        | (809.91,<br>815.44)        | (-0.02,<br>0.04)       | 0.433  | (180.53,<br>184.14) | (72.98,<br>74.65)   | (-3.37,<br>-2.82) | <0.001          | (2.13,<br>2.54)  | (0.50,<br>0.65)   | (-5.15,<br>-4.37) | <0.001 |
|                       | 74.49               | 72.69               | -0.08             |        | 1250.47                    | 1261.51                    | 0.04                   |        | 90.84               | 69.74               | -0.92             | 0.53            | 0.16             | -3.95             |                   |        |
| El Salvador           | (70.88,<br>78.26)   | (69.47,<br>76.04)   | (-0.09,<br>-0.08) | <0.001 | (1234.88,<br>,<br>1266.23) | (1247.72,<br>,<br>1275.43) | (0.02,<br>,<br>0.05)   | <0.001 | (86.64,<br>95.20)   | (66.52,<br>73.09)   | (-1.04,<br>-0.79) | <0.001          | (0.25,<br>1.01)  | (0.04,<br>0.43)   | (-4.52,<br>-3.39) | <0.001 |
|                       | 105.97              | 86.91               | -0.69             |        | 1890.12                    | 1748.58                    | -0.28                  |        | 216.54              | 97.56               | -2.74             | 2.10            | 0.24             | -7.24             |                   |        |
| Equatorial Guinea     | (90.36,<br>123.75)  | (80.00,<br>94.35)   | (-0.75,<br>-0.64) | <0.001 | (1820.06,<br>,<br>1962.36) | (1715.84,<br>,<br>1781.86) | (-0.30,<br>,<br>-0.25) | <0.001 | (193.28,<br>242.02) | (89.94,<br>105.73)  | (-2.86,<br>-2.62) | <0.001          | (0.43,<br>6.48)  | (0.01,<br>1.23)   | (-7.62,<br>-6.85) | <0.001 |
|                       | 130.43              | 129.69              | -0.01             |        | 2187.11                    | 2199.84                    | 0.00                   |        | 236.74              | 162.54              | -1.28             | 2.15            | 0.93             | -2.87             |                   |        |
| Eritrea               | (124.06,<br>137.07) | (125.64,<br>133.85) | (-0.05,<br>0.02)  | 0.450  | (2159.72,<br>,<br>2214.79) | (2182.52,<br>,<br>2217.26) | (-0.06,<br>,<br>0.06)  | 0.921  | (227.86,<br>245.91) | (157.88,<br>167.31) | (-1.51,<br>-1.05) | <0.001          | (1.37,<br>3.24)  | (0.61,<br>1.38)   | (-3.09,<br>-2.65) | <0.001 |



|          |         |          |         |        |           |           |         |        |          |          |         |        |        |        |         |        |
|----------|---------|----------|---------|--------|-----------|-----------|---------|--------|----------|----------|---------|--------|--------|--------|---------|--------|
|          | 4.61    | 3.06     | -1.39   |        | 32.12     | 26.61     | -0.63   |        | 53.71    | 8.87     | -6.00   |        | 0.91   | 0.13   | -7.45   |        |
| Estonia  | (3.07,  | (1.68,   | (-1.46, | <0.001 | (27.73,   | (21.94,   | (-0.71, | <0.001 | (47.98,  | (6.33,   | (-6.73, | <0.001 | (0.31, | (0.00, | (-8.03, | <0.001 |
|          | 6.70)   | 5.37)    | -1.32)  |        | 37.04)    | 32.13)    | -0.55)  |        | 59.97)   | 12.27)   | -5.26)  |        | 2.12)  | 1.51)  | -6.86)  |        |
|          |         |          |         |        | 1585.68   | 1592.00   | 0.01    |        | 202.60   | 146.74   | -1.10   |        | 2.11   | 1.17   | -2.00   |        |
| Eswatini | (87.47, | (88.95,  | (-0.05, | <0.001 | (1539.50, | (1557.23, | (0.01,  | <0.001 | (186.15, | (136.30, | (-1.32, | <0.001 | (0.74, | (0.42, | (-2.39, | <0.001 |
|          | 110.18) | 106.22)  | -0.02)  |        | ,         | ,         | 0.02)   |        | 220.25)  | 157.82)  | -0.88)  |        | 4.95)  | 2.66)  | -1.61)  |        |
|          |         |          |         |        | 1555.95   | 1749.08   | 0.40    |        | 230.60   | 120.39   | -2.21   |        | 2.52   | 0.59   | -4.85   |        |
| Ethiopia | (99.50, | (103.56, | (0.09,  | <0.001 | (1550.16, | (1745.10, | (0.33,  | <0.001 | (228.40, | (119.35, | (-2.31, | <0.001 | (2.30, | (0.52, | (-5.02, | <0.001 |
|          | 102.35) | 105.43)  | 0.15)   |        | ,         | ,         | 0.47)   |        | 232.81)  | 121.43)  | -2.10)  |        | 2.77)  | 0.67)  | -4.69)  |        |
|          |         |          |         |        | 1561.76)  | 1753.06)  |         |        |          |          |         |        |        |        |         |        |
|          |         |          |         |        | 406.59    | 626.97    | 1.46    |        | 552.59   | 340.63   | -1.64   |        | 8.75   | 5.09   | -1.80   |        |
| Fiji     | (21.62, | (26.36,  | (0.54,  | <0.001 | (384.65,  | (601.31,  | (1.40,  | <0.001 | (527.06, | (321.79, | (-1.72, | <0.001 | (5.79, | (3.03, | (-1.91, | <0.001 |
|          | 33.47)  | 38.38)   | 0.62)   |        | 429.51)   | 653.45)   | 1.52)   |        | 579.10)  | 360.30)  | -1.56)  |        | 12.76) | 8.03)  | -1.70)  |        |
|          |         |          |         |        | 4.96      | 4.52      | -0.36   |        | 5.12     | 1.30     | -4.64   |        | 0.08   | 0.02   | -5.34   |        |
| Finland  | (0.12,  | (0.07,   | (-1.49, | 0.002  | (3.99,    | (3.56,    | (-0.46, | <0.001 | (4.16,   | (0.82,   | (-5.04, | <0.001 | (0.01, | (0.00, | (-6.05, | <0.001 |
|          | 0.73)   | 0.65)    | -0.34)  |        | 6.12)     | 5.67)     | -0.27)  |        | 6.27)    | 1.99)    | -4.25)  |        | 0.40)  | 0.30)  | -4.62)  |        |
|          |         |          |         |        | 7.05      | 6.51      | -0.27   |        | 11.51    | 5.14     | -2.71   |        | 0.19   | 0.08   | -2.98   |        |
| France   | (0.36,  | (0.29,   | (-1.14, | 0.002  | (6.71,    | (6.16,    | (-0.33, | <0.001 | (11.07,  | (4.83,   | (-3.08, | <0.001 | (0.13, | (0.05, | (-3.97, | <0.001 |
|          | 0.54)   | 0.47)    | -0.26)  |        | 7.41)     | 6.87)     | -0.21)  |        | 11.97)   | 5.46)    | -2.34)  |        | 0.25)  | 0.13)  | -1.97)  |        |
|          |         |          |         |        | 1758.42   | 1806.28   | 0.10    |        | 144.19   | 104.25   | -1.11   |        | 1.00   | 0.30   | -4.14   |        |
| Gabon    | (77.45, | (81.82,  | (0.07,  | <0.001 | (1716.10, | (1775.77, | (0.09,  | <0.001 | (132.23, | (97.02,  | (-1.20, | <0.001 | (0.25, | (0.04, | (-4.33, | <0.001 |
|          | 96.19)  | 95.34)   | 0.09)   |        | ,         | ,         | 0.11)   |        | 157.02)  | 111.91)  | -1.01)  |        | 2.81)  | 1.09)  | -3.95)  |        |
|          |         |          |         |        | 1243.72   | 1312.72   | 0.19    |        | 120.93   | 93.01    | -0.85   |        | 1.00   | 0.49   | -2.31   |        |
| Gambia   | (67.00, | (73.85,  | (0.16,  | <0.001 | (1207.58, | (1289.21, | (0.17,  | <0.001 | (109.91, | (86.86,  | (-1.35, | 0.001  | (0.25, | (0.15, | (-3.51, | <0.001 |
|          | 84.80)  | 85.26)   | 0.19)   |        | ,         | ,         | 0.21)   |        | 132.89)  | 99.53)   | -0.35)  |        | 2.93)  | 1.28)  | -1.09)  |        |
|          |         |          |         |        | 1280.79)  | 1336.58)  |         |        |          |          |         |        |        |        |         |        |
|          |         |          |         |        | 1101.89   | 1123.77   | 0.07    |        | 177.17   | 132.73   | -1.04   |        | 2.02   | 1.29   | -1.52   |        |
| Georgia  | (53.84, | (53.95,  | (0.07,  | <0.001 | (1087.83, | (1104.58, | (0.06,  | <0.001 | (171.55, | (126.14, | (-2.28, | 0.104  | (1.47, | (0.72, | (-2.87, | 0.031  |
|          | 60.37)  | 63.16)   | 0.10)   |        | ,         | ,         | 0.08)   |        | 182.94)  | 139.59)  | 0.22)   |        | 2.73)  | 2.16)  | -0.14)  |        |
|          |         |          |         |        | 1116.09)  | 1143.24)  |         |        |          |          |         |        |        |        |         |        |
| Germany  | 0.50    | 0.39     | -0.91   | <0.001 | 7.62      | 6.80      | -0.44   | <0.001 | 10.96    | 4.44     | -3.14   | <0.001 | 0.18   | 0.07   | -3.27   | <0.001 |

|               |                 |                |                |        |                  |                   |                |        |                  |                  |                |        |               |               |                |        |
|---------------|-----------------|----------------|----------------|--------|------------------|-------------------|----------------|--------|------------------|------------------|----------------|--------|---------------|---------------|----------------|--------|
|               | (0.43, 0.59)    | (0.32, 0.47)   | (-1.19, -0.64) |        | (7.31, 7.95)     | (6.49, 7.13)      | (-0.67, -0.20) |        | (10.59, 11.34)   | (4.19, 4.70)     | (-3.39, -2.89) |        | (0.14, 0.24)  | (0.04, 0.11)  | (-3.78, -2.75) |        |
|               |                 |                |                |        | 1224.90          | 1229.26           |                |        |                  |                  |                |        |               |               |                |        |
|               | 76.30           | 74.08          | -0.10          |        | (1215.71         | (1223.34          | 0.01           |        | 119.39           | 83.65            | -1.23          |        | 0.99          | 0.41          | -2.99          |        |
| Ghana         | (74.08, 78.58)  | (72.65, 75.52) | (-0.13, -0.07) | <0.001 | ,                | ,                 | (0.01, 0.02)   | <0.001 | (116.54, 122.29) | (82.11, 85.21)   | (-1.37, -1.08) | <0.001 | (0.75, 1.30)  | (0.31, 0.53)  | (-3.21, -2.77) | <0.001 |
|               |                 |                |                |        | 1234.14)         | 1235.21)          |                |        |                  |                  |                |        |               |               |                |        |
|               | 0.40            | 0.34           | -0.49          |        | 6.52             | 6.13              | -0.17          |        | 6.53             | 2.47             | -3.17          |        | 0.11          | 0.04          | -3.18          |        |
| Greece        | (0.23, 0.66)    | (0.17, 0.64)   | (-0.88, -0.10) | 0.014  | (5.73, 7.39)     | (5.26, 7.12)      | (-0.23, -0.10) | <0.001 | (5.75, 7.40)     | (1.94, 3.11)     | (-3.99, -2.34) | <0.001 | (0.03, 0.27)  | (0.00, 0.22)  | (-4.03, -2.31) | <0.001 |
|               | 2.31            | 1.67           | -1.17          |        | 33.14            | 27.65             | -0.63          |        | 22.61            | 7.13             | -3.88          |        | 0.36          | 0.10          | -4.32          |        |
| Greenland     | (0.01, 25.59)   | (0.00, 25.43)  | (-1.27, -1.06) | <0.001 | (14.81, 67.92)   | (9.84, 63.81)     | (-0.69, -0.57) | <0.001 | (8.34, 53.76)    | (0.51, 34.15)    | (-4.37, -3.39) | <0.001 | (0.00, 22.61) | (0.00, 22.71) | (-4.86, -3.78) | <0.001 |
|               |                 |                |                |        | 1289.41          | 1277.81           |                |        |                  |                  |                |        |               |               |                |        |
|               | 70.64           | 67.26          | -0.17          |        | (1168.71         | (1169.85          | -0.03          |        | 295.51           | 136.09           | -2.61          |        | 3.98          | 1.27          | -3.80          |        |
| Grenada       | (45.36, 106.26) | (44.56, 98.14) | (-0.18, -0.16) | <0.001 | ,                | ,                 | (-0.04, -0.03) | <0.001 | (238.41, 362.92) | (102.23, 178.10) | (-2.91, -2.30) | <0.001 | (0.18, 20.91) | (0.00, 13.09) | (-4.20, -3.41) | <0.001 |
|               |                 |                |                |        | 1420.00)         | 1393.52)          |                |        |                  |                  |                |        |               |               |                |        |
|               | 31.50           | 32.57          | 0.12           |        | 786.27           | 828.31            | 0.18           |        | 171.92           | 145.16           | -0.62          |        | 2.18          | 1.75          | -0.83          |        |
| Guam          | (19.18, 49.03)  | (19.80, 50.72) | (0.10, 0.14)   | <0.001 | (718.47, 858.93) | (757.16, 904.51)  | (0.17, 0.19)   | <0.001 | (141.00, 207.80) | (116.14, 179.38) | (-0.99, -0.25) | 0.001  | (0.13, 10.33) | (0.05, 9.86)  | (-1.36, -0.29) | 0.002  |
|               |                 |                |                |        | 1212.70          | 1265.28           |                |        |                  |                  |                |        |               |               |                |        |
|               | 77.41           | 78.85          | 0.06           |        | (1199.79         | (1257.37          | 0.15           |        | 88.42            | 69.01            | -0.86          |        | 0.52          | 0.15          | -4.24          |        |
| Guatemala     | (74.28, 80.65)  | (76.92, 80.81) | (0.05, 0.08)   | <0.001 | ,                | ,                 | (0.13, 0.16)   | <0.001 | (84.95, 92.01)   | (67.18, 70.89)   | (-1.18, -0.54) | <0.001 | (0.28, 0.89)  | (0.07, 0.27)  | (-5.93, -2.52) | <0.001 |
|               |                 |                |                |        | 1225.73)         | 1273.22)          |                |        |                  |                  |                |        |               |               |                |        |
|               | 59.80           | 66.08          | 0.33           |        | 850.89           | 1004.99           | 0.57           |        | 143.15           | 99.06            | -1.27          |        | 1.67          | 0.83          | -2.37          |        |
| Guinea        | (56.59, 63.14)  | (63.82, 68.40) | (0.30, 0.37)   | <0.001 | (838.44, 863.49) | (995.88, 1014.16) | (0.52, 0.62)   | <0.001 | (138.10, 148.35) | (96.23, 101.97)  | (-1.37, -1.17) | <0.001 | (1.16, 2.34)  | (0.59, 1.15)  | (-2.51, -2.23) | <0.001 |
|               |                 |                |                |        | 1199.95          | 1273.58           |                |        |                  |                  |                |        |               |               |                |        |
|               | 79.80           | 84.08          | 0.18           |        | (1164.32         | (1248.70          | 0.20           |        | 222.62           | 127.04           | -1.92          |        | 2.69          | 1.08          | -3.11          |        |
| Guinea-Bissau | (71.07, 89.43)  | (77.92, 90.65) | (0.17, 0.19)   | <0.001 | ,                | ,                 | (0.20, 0.21)   | <0.001 | (207.54, 238.60) | (119.28, 135.22) | (-2.02, -1.82) | <0.001 | (1.26, 5.15)  | (0.48, 2.16)  | (-3.28, -2.93) | <0.001 |
|               |                 |                |                |        | 1236.47)         | 1298.86)          |                |        |                  |                  |                |        |               |               |                |        |
|               | 81.95           | 78.82          | -0.13          |        | 1287.44          | 1279.10           | -0.02          |        | 237.39           | 151.73           | -1.49          |        | 2.94          | 1.54          | -2.14          |        |
| Guyana        | (72.73, 92.14)  | (69.50, 89.10) | (-0.17, -0.09) | <0.001 | (1248.97,        | (1239.97,         | (-0.04, -0.01) | 0.008  | (220.90, 254.86) | (138.33, 166.12) | (-2.09, -0.89) | <0.001 | (1.37, 5.65)  | (0.47, 3.78)  | (-2.99, -1.29) | <0.001 |

|                               |         |         |         |        |          |          |         |        |          |          |         |        |        |        |         |        |
|-------------------------------|---------|---------|---------|--------|----------|----------|---------|--------|----------|----------|---------|--------|--------|--------|---------|--------|
|                               |         |         |         |        | 1326.88) | 1319.21) |         |        |          |          |         |        |        |        |         |        |
|                               |         |         |         |        | 1263.02  | 1298.20  |         |        |          |          |         |        |        |        |         |        |
|                               | 87.75   | 89.67   | 0.07    |        |          |          |         |        |          |          |         |        |        |        |         |        |
| Haiti                         | (84.11, | (87.16, | (0.05,  | <0.001 | (1248.76 | (1288.52 | (0.08,  | <0.001 | (691.80, | (317.52, | (-2.79, | <0.001 | (9.55, | (3.85, | (-3.22, | <0.001 |
|                               | 91.52)  | 92.24)  | 0.10)   |        | ,        | ,        | 0.10)   |        | 713.46)  | 327.25)  | -2.38)  |        | 12.31) | 5.01)  | -2.77)  |        |
|                               |         |         |         |        | 1277.41) | 1307.94) |         |        |          |          |         |        |        |        |         |        |
|                               |         |         |         |        | 1278.69  | 1279.06  |         |        |          |          |         |        |        |        |         |        |
| Honduras                      | 79.61   | 77.99   | -0.07   | <0.001 | (1261.41 | (1268.14 | (-0.01, | 0.511  | (68.65,  | (61.97,  | (-0.47, | <0.001 | (0.04, | (0.01, | (-4.95, | <0.001 |
|                               | (75.50, | (75.39, | (-0.07, |        | ,        | ,        | 0.01)   |        | 77.06)   | 66.92)   | -0.32)  |        | 0.62)  | 0.21)  | -3.72)  |        |
|                               | 83.90)  | 80.67)  | -0.06)  |        | 1296.16) | 1290.05) |         |        |          |          |         |        |        |        |         |        |
|                               |         |         |         |        | 11.80    | 10.04    | -0.56   |        | 48.94    | 7.13     | -6.50   |        | 0.85   | 0.12   | -6.69   |        |
| Hungary                       | (1.28,  | (0.85,  | (-1.22, | <0.001 | (10.75,  | (8.94,   | (-0.65, | <0.001 | (46.78,  | (6.22,   | (-7.12, | <0.001 | (0.59, | (0.03, | (-7.37, | <0.001 |
|                               | 2.10)   | 1.66)   | -0.95)  |        | 12.94)   | 11.25)   | -0.47)  |        | 51.18)   | 8.16)    | -5.87)  |        | 1.20)  | 0.34)  | -6.01)  |        |
|                               |         |         |         |        | 7.40     | 7.65     | 0.12    |        | 4.78     | 2.31     | -2.50   |        | 0.07   | 0.03   | -3.08   |        |
| Iceland                       | (0.00,  | (0.00,  | (-0.11, | 0.294  | (3.13,   | (3.54,   | (0.06,  | <0.001 | (1.55,   | (0.45,   | (-2.83, | <0.001 | (0.00, | (0.00, | (-4.42, | <0.001 |
|                               | 4.62)   | 4.50)   | 0.38)   |        | 14.91)   | 14.77)   | 0.19)   |        | 11.33)   | 7.43)    | -2.18)  |        | 3.98)  | 3.82)  | -1.71)  |        |
|                               |         |         |         |        |          |          |         |        |          |          |         |        |        |        |         |        |
|                               |         |         |         |        | 991.14   | 1001.02  | 0.06    |        | 493.94   | 265.04   | -2.18   |        | 7.46   | 3.67   | -2.44   |        |
| India                         | (76.16, | (73.61, | (-0.30, | 0.129  | (990.07, | (1000.22 | (0.04,  | <0.001 | (493.18, | (264.63, | (-2.56, | <0.001 | (7.37, | (3.62, | (-2.86, | <0.001 |
|                               | 76.75)  | 74.04)  | 0.04)   |        | 992.21)  | ,        | 0.08)   |        | 494.70)  | 265.46)  | -1.80)  |        | 7.56)  | 3.72)  | -2.03)  |        |
|                               |         |         |         |        |          | 1001.83) |         |        |          |          |         |        |        |        |         |        |
|                               |         |         |         |        | 152.90   | 179.06   | 0.55    |        | 70.71    | 25.40    | -3.46   |        | 1.06   | 0.28   | -4.51   |        |
| Indonesia                     | (10.14, | (11.27, | (0.33,  | <0.001 | (152.02, | (178.26, | (0.53,  | <0.001 | (70.10,  | (25.10,  | (-3.58, | <0.001 | (0.99, | (0.24, | (-4.69, | <0.001 |
|                               | 10.60)  | 11.68)  | 0.37)   |        | 153.78)  | 179.87)  | 0.57)   |        | 71.31)   | 25.71)   | -3.34)  |        | 1.14)  | 0.31)  | -4.32)  |        |
|                               |         |         |         |        | 722.58   | 725.23   | 0.02    |        | 91.43    | 53.27    | -1.84   |        | 0.94   | 0.30   | -3.77   |        |
| Iran (Islamic<br>Republic of) | (42.48, | (41.68, | (-0.08, | <0.001 | (718.97, | (722.39, | (0.01,  | 0.004  | (90.14,  | (52.50,  | (-2.04, | <0.001 | (0.81, | (0.25, | (-4.31, | <0.001 |
|                               | 44.19)  | 43.13)  | -0.06)  |        | 726.21)  | 728.09)  | 0.03)   |        | 92.72)   | 54.05)   | -1.63)  |        | 1.08)  | 0.37)  | -3.22)  |        |
|                               |         |         |         |        | 743.47   | 753.49   | 0.04    |        | 126.94   | 53.33    | -2.96   |        | 1.56   | 0.30   | -5.52   |        |
| Iraq                          | (45.27, | (46.07, | (-0.01, | 0.402  | (736.66, | (749.50, | (0.04,  | <0.001 | (124.08, | (52.26,  | (-3.16, | <0.001 | (1.25, | (0.22, | (-5.93, | <0.001 |
|                               | 48.60)  | 48.03)  | 0.02)   |        | 750.33)  | 757.50)  | 0.05)   |        | 129.84)  | 54.41)   | -2.76)  |        | 1.92)  | 0.39)  | -5.11)  |        |
|                               |         |         |         |        | 7.09     | 6.89     | -0.08   |        | 7.02     | 2.43     | -3.61   |        | 0.11   | 0.04   | -3.70   |        |
| Ireland                       | (0.18,  | (0.15,  | (-0.97, | <0.001 | (5.75,   | (5.67,   | (-0.13, | 0.002  | (5.68,   | (1.74,   | (-4.36, | <0.001 | (0.01, | (0.00, | (-5.56, | <0.001 |
|                               | 1.02)   | 0.84)   | -0.35)  |        | 8.66)    | 8.31)    | -0.03)  |        | 8.59)    | 3.32)    | -2.86)  |        | 0.49)  | 0.33)  | -1.80)  |        |
|                               |         |         |         |        | 8.43     | 7.26     | -0.52   |        | 22.04    | 9.48     | -2.91   |        | 0.37   | 0.15   | -3.04   |        |
| Israel                        | (0.33,  | (0.26,  | (-1.31, | <0.001 | (7.17,   | (6.36,   | (-0.59, | <0.001 | (19.96,  | (8.45,   | (-3.82, | <0.001 | (0.15, | (0.05, | (-4.00, | <0.001 |

|              |         |         |         |        |           |           |         |        |           |          |         |        |        |        |         |        |
|--------------|---------|---------|---------|--------|-----------|-----------|---------|--------|-----------|----------|---------|--------|--------|--------|---------|--------|
|              | 1.11)   | 0.76)   | -0.86)  |        | 9.85)     | 8.25)     | -0.45)  |        | 24.27)    | 10.60)   | -2.01)  |        | 0.77)  | 0.36)  | -2.08)  |        |
|              | 1.28)   | 0.45)   | -3.50)  |        | 20.41)    | 11.06)    | -2.11)  |        | 24.31)    | 7.95)    | -3.86)  |        | 0.39)  | 0.12)  | -4.18)  |        |
| Italy        | (1.13,  | (0.36,  | (-3.85, | <0.001 | (19.81,   | (10.55,   | (-2.22, | <0.001 | (23.65,   | (7.53,   | (-4.48, | <0.001 | (0.31, | (0.07, | (-4.61, | <0.001 |
|              | 1.44)   | 0.57)   | -3.16)  |        | 21.03)    | 11.59)    | -2.00)  |        | 24.98)    | 8.40)    | -3.23)  |        | 0.49)  | 0.19)  | -3.74)  |        |
|              | 63.12)  | 64.84)  | 0.09)   |        | 1230.46)  | 1288.85)  | 0.16)   |        | 191.78)   | 121.75)  | -1.52)  |        | 2.14)  | 0.99)  | -2.58)  |        |
| Jamaica      | (58.32, | (60.35, | (0.08,  | <0.001 | (1208.14, | (1268.53, | (0.15,  | <0.001 | (183.14,  | (115.57, | (-2.04, | <0.001 | (1.31, | (0.51, | (-3.54, | <0.001 |
|              | 68.27)  | 69.59)  | 0.11)   |        | '         | '         | 0.17)   |        | 200.77)   | 128.19)  | -0.99)  |        | 3.34)  | 1.75)  | -1.62)  |        |
|              | 0.63)   | 0.27)   | -2.97)  |        | 14.33)    | 9.61)     | -1.37)  |        | 8.90)     | 3.28)    | -3.40)  |        | 0.14)  | 0.05)  | -3.67)  |        |
| Japan        | (0.56,  | (0.21,  | (-3.22, | <0.001 | (13.98,   | (9.28,    | (-1.41, | <0.001 | (8.63,    | (3.09,   | (-3.74, | <0.001 | (0.11, | (0.03, | (-4.02, | <0.001 |
|              | 0.70)   | 0.33)   | -2.73)  |        | 14.68)    | 9.96)     | -1.34)  |        | 9.18)     | 3.48)    | -3.06)  |        | 0.18)  | 0.08)  | -3.32)  |        |
|              | 0.96)   | 0.77)   | -0.74)  |        | 14.34)    | 12.55)    | -0.45)  |        | 24.99)    | 6.51)    | -4.43)  |        | 0.41)  | 0.10)  | -4.65)  |        |
| Jordan       | (0.49,  | (0.54,  | (-0.93, | <0.001 | (12.36,   | (11.58,   | (-0.56, | <0.001 | (22.33,   | (5.82,   | (-5.00, | <0.001 | (0.13, | (0.03, | (-5.45, | <0.001 |
|              | 1.74)   | 1.06)   | -0.54)  |        | 16.60)    | 13.58)    | -0.34)  |        | 27.90)    | 7.27)    | -3.87)  |        | 1.00)  | 0.24)  | -3.84)  |        |
|              | 8.30)   | 3.56)   | -2.88)  |        | 61.17)    | 36.41)    | -1.75)  |        | 222.60)   | 34.46)   | -6.30)  |        | 3.77)  | 0.57)  | -6.36)  |        |
| Kazakhstan   | (7.63,  | (3.14,  | (-2.96, | <0.001 | (59.32,   | (35.02,   | (-1.83, | <0.001 | (219.06,  | (33.12,  | (-6.82, | <0.001 | (3.32, | (0.41, | (-6.90, | <0.001 |
|              | 9.02)   | 4.03)   | -2.79)  |        | 63.06)    | 37.85)    | -1.67)  |        | 226.18)   | 35.85)   | -5.78)  |        | 4.26)  | 0.77)  | -5.81)  |        |
|              | 99.78)  | 101.13) | 0.05)   |        | 1589.43)  | 1741.29)  | 0.34)   |        | 120.69)   | 111.63)  | -0.27)  |        | 0.72)  | 0.46)  | -1.53)  |        |
| Kenya        | (97.73, | (99.82, | (0.04,  | <0.001 | (1580.75, | (1735.66, | (0.29,  | <0.001 | (118.33,  | (110.22, | (-0.33, | <0.001 | (0.55, | (0.37, | (-1.73, | <0.001 |
|              | 101.88) | 102.45) | 0.05)   |        | '         | '         | 0.38)   |        | 123.09)   | 113.06)  | -0.21)  |        | 0.94)  | 0.56)  | -1.33)  |        |
|              | 46.72)  | 48.03)  | 0.10)   |        | 771.50)   | 790.51)   | 0.08)   |        | 1231.05)  | 835.85)  | -1.33)  |        | 20.07) | 13.40) | -1.39)  |        |
| Kiribati     | (25.51, | (30.54, | (0.09,  | <0.001 | (675.22,  | (713.42,  | (0.07,  | <0.001 | (1106.69, | (755.92, | (-1.39, | <0.001 | (7.16, | (5.10, | (-1.45, | <0.001 |
|              | 79.81)  | 72.20)  | 0.10)   |        | 878.60)   | 873.91)   | 0.10)   |        | '         | 922.15)  | -1.28)  |        | 45.72) | 28.88) | -1.34)  |        |
|              | 0.96)   | 0.75)   | -0.83)  |        | 17.69)    | 14.40)    | -0.70)  |        | 35.62)    | 7.31)    | -5.25)  |        | 0.56)  | 0.11)  | -5.47)  |        |
| Kuwait       | (0.42,  | (0.42,  | (-1.03, | <0.001 | (14.99,   | (12.76,   | (-0.74, | <0.001 | (31.63,   | (6.09,   | (-6.49, | <0.001 | (0.17, | (0.01, | (-7.29, | <0.001 |
|              | 1.96)   | 1.32)   | -0.63)  |        | 20.79)    | 16.25)    | -0.66)  |        | 40.01)    | 8.75)    | -4.00)  |        | 1.44)  | 0.50)  | -3.61)  |        |
|              | 61.56)  | 62.16)  | 0.03)   |        | 1076.60)  | 1081.93)  | 0.02)   |        | 447.14)   | 137.76)  | -3.96)  |        | 6.75)  | 1.48)  | -5.03)  |        |
| Kyrgyzstan   | (58.02, | (59.18, | (0.02,  | <0.001 | (1061.40, | (1069.45, | (0.01,  | <0.001 | (437.23,  | (133.31, | (-4.33, | <0.001 | (5.58, | (1.05, | (-5.58, | <0.001 |
|              | 65.27)  | 65.25)  | 0.05)   |        | '         | '         | 0.02)   |        | 457.23)   | 142.33)  | -3.60)  |        | 8.12)  | 2.04)  | -4.47)  |        |
|              | 61.81)  | 58.27)  | -0.21)  | <0.001 | 1091.97)  | 1094.53)  |         |        | 332.53)   | 200.53)  | -1.71)  | <0.001 | 4.83)  | 2.61)  | -2.09)  | <0.001 |
| Lao People's |         |         |         |        | 894.10)   | 883.36)   | -0.05)  | 0.009  |           |          |         |        |        |        |         |        |

|                     |                  |                  |                |        |                    |                    |                |        |                  |                  |                |        |              |              |                |
|---------------------|------------------|------------------|----------------|--------|--------------------|--------------------|----------------|--------|------------------|------------------|----------------|--------|--------------|--------------|----------------|
| Democratic Republic | (57.96, 65.86)   | (55.64, 60.99)   | (-0.24, -0.18) |        | (878.94, 909.47)   | (872.97, 893.84)   | (-0.09, -0.01) |        | (323.24, 342.03) | (195.59, 205.57) | (-1.92, -1.50) |        | (3.76, 6.13) | (2.08, 3.25) | (-2.33, -1.84) |
|                     | 6.87             | 3.17             | -2.63          |        | 45.44              | 28.21              | -1.64          |        | 108.57           | 16.45            | -6.26          |        | 1.86         | 0.27         | -6.38          |
| Latvia              | (5.35, 8.72)     | (1.95, 5.03)     | (-2.84, -2.43) | <0.001 | (41.33, 49.86)     | (24.09, 32.92)     | (-1.75, -1.54) | <0.001 | (102.17, 115.29) | (13.42, 20.07)   | (-8.30, -4.18) | <0.001 | (1.11, 2.95) | (0.02, 1.31) | (-8.65, -4.05) |
|                     | 2.00             | 1.05             | -2.24          |        | 26.82              | 16.30              | -1.73          |        | 62.51            | 16.98            | -4.41          |        | 1.01         | 0.26         | -4.52          |
| Lebanon             | (1.26, 3.04)     | (0.66, 1.62)     | (-2.38, -2.10) | <0.001 | (23.90, 30.02)     | (14.60, 18.16)     | (-1.81, -1.65) | <0.001 | (58.03, 67.25)   | (15.22, 18.90)   | (-4.53, -4.28) | <0.001 | (0.51, 1.81) | (0.09, 0.63) | (-4.70, -4.34) |
|                     | 104.19           | 102.33           | -0.05          |        | 1608.62            | 1613.36            | 0.01           |        | 200.20           | 169.61           | -0.57          |        | 2.04         | 1.54         | -0.98          |
| Lesotho             | (96.80, 112.07)  | (96.04, 108.93)  | (-0.09, -0.02) | 0.001  | (1578.15, 1639.57) | (1587.88, 1639.16) | (0.01, 0.02)   | <0.001 | (189.49, 211.41) | (161.40, 178.14) | (-0.67, -0.47) | <0.001 | (1.09, 3.57) | (0.85, 2.58) | (-1.16, -0.79) |
|                     | 76.31            | 82.54            | 0.27           |        | 1198.32            | 1295.96            | 0.27           |        | 138.42           | 94.45            | -1.31          |        | 1.32         | 0.53         | -3.05          |
| Liberia             | (69.83, 83.26)   | (78.63, 86.61)   | (0.22, 0.31)   | <0.001 | (1171.71, 1225.41) | (1279.96, 1312.12) | (0.25, 0.28)   | <0.001 | (129.50, 147.81) | (90.18, 98.88)   | (-1.48, -1.13) | <0.001 | (0.59, 2.58) | (0.26, 0.99) | (-3.41, -2.69) |
|                     | 37.92            | 43.03            | 0.44           |        | 669.21             | 751.82             | 0.40           |        | 92.80            | 56.25            | -1.68          |        | 0.99         | 0.33         | -3.63          |
| Libya               | (34.99, 41.05)   | (40.69, 45.48)   | (0.41, 0.47)   | <0.001 | (656.26, 682.37)   | (742.09, 761.65)   | (0.39, 0.41)   | <0.001 | (88.06, 97.74)   | (53.60, 58.99)   | (-1.93, -1.43) | <0.001 | (0.56, 1.67) | (0.16, 0.62) | (-4.27, -2.99) |
|                     | 5.97             | 2.98             | -2.43          |        | 37.29              | 25.06              | -1.42          |        | 91.17            | 15.62            | -6.01          |        | 1.58         | 0.26         | -6.28          |
| Lithuania           | (4.76, 7.40)     | (1.96, 4.41)     | (-2.77, -2.08) | <0.001 | (34.16, 40.64)     | (21.84, 28.67)     | (-1.67, -1.17) | <0.001 | (86.26, 96.29)   | (13.15, 18.48)   | (-7.67, -4.33) | <0.001 | (0.99, 2.40) | (0.04, 0.98) | (-7.85, -4.69) |
|                     | 0.62             | 0.53             | -0.60          |        | 10.40              | 10.16              | -0.09          |        | 9.90             | 3.97             | -3.06          |        | 0.16         | 0.06         | -3.28          |
| Luxembourg          | (0.01, 4.60)     | (0.02, 3.22)     | (-0.79, -0.41) | <0.001 | (5.85, 17.60)      | (6.34, 15.73)      | (-0.14, -0.04) | 0.001  | (5.50, 16.93)    | (1.80, 7.97)     | (-3.51, -2.61) | <0.001 | (0.00, 3.89) | (0.00, 2.50) | (-4.04, -2.50) |
|                     | 102.94           | 110.21           | 0.23           |        | 1761.82            | 1881.20            | 0.23           |        | 335.20           | 206.92           | -1.62          |        | 4.01         | 1.87         | -2.56          |
| Madagascar          | (100.06, 105.90) | (108.29, 112.16) | (0.22, 0.25)   | <0.001 | (1749.36, 1774.35) | (1872.95, 1889.47) | (0.21, 0.25)   | <0.001 | (329.87, 340.60) | (204.22, 209.65) | (-1.98, -1.26) | <0.001 | (3.44, 4.65) | (1.62, 2.15) | (-3.07, -2.04) |
|                     | 121.47           | 125.69           | 0.12           |        | 1940.09            | 2024.27            | 0.15           |        | 186.75           | 136.16           | -1.07          |        | 1.51         | 0.63         | -2.94          |
| Malawi              | (117.96, 125.07) | (123.23, 128.19) | (0.11, 0.12)   | <0.001 | (1925.46, 1954.82) | (2013.94, 2034.66) | (0.13, 0.16)   | <0.001 | (182.28, 191.31) | (133.51, 138.84) | (-1.14, -0.99) | <0.001 | (1.13, 1.99) | (0.47, 0.84) | (-3.28, -2.60) |

|                   |         |         |         |        |           |           |         |        |          |          |         |        |        |        |         |        |
|-------------------|---------|---------|---------|--------|-----------|-----------|---------|--------|----------|----------|---------|--------|--------|--------|---------|--------|
|                   | 39.91   | 38.67   | -0.11   |        | 756.20    | 763.21    | 0.03    |        | 154.69   | 58.76    | -3.27   |        | 1.96   | 0.37   | -5.65   |        |
| Malaysia          | (38.50, | (37.63, | (-0.12, | <0.001 | (749.91,  | (758.60,  | (0.03,  | <0.001 | (151.85, | (57.49,  | (-3.46, | <0.001 | (1.65, | (0.27, | (-5.91, | <0.001 |
|                   | 41.37)  | 39.73)  | -0.09)  |        | 762.53)   | 767.83)   | 0.04)   |        | 157.57)  | 60.06)   | -3.08)  |        | 2.31)  | 0.49)  | -5.40)  |        |
|                   | 40.99   | 37.58   | -0.30   |        | 738.91    | 703.69    | -0.17   |        | 201.15   | 53.80    | -4.32   |        | 2.76   | 0.33   | -7.01   |        |
| Maldives          | (28.20, | (29.65, | (-0.31, | <0.001 | (678.12,  | (669.79,  | (-0.19, | <0.001 | (169.76, | (44.68,  | (-4.48, | <0.001 | (0.31, | (0.00, | (-7.36, | <0.001 |
|                   | 58.77)  | 47.28)  | -0.29)  |        | 804.44)   | 739.18)   | -0.15)  |        | 237.45)  | 64.60)   | -4.17)  |        | 11.78) | 3.16)  | -6.65)  |        |
|                   |         |         |         |        | 1388.21   | 1413.43   |         |        | 224.20   | 124.03   | -1.98   |        | 2.58   | 0.92   | -3.49   |        |
| Mali              | (84.57, | (85.80, | (-0.02, | 0.763  | (1374.62, | (1404.99, | (0.04,  | <0.001 | (218.78, | (121.54, | (-2.24, | <0.001 | (2.02, | (0.72, | (-3.77, | <0.001 |
|                   | 91.28)  | 89.85)  | 0.03)   |        | ,         | ,         | 0.09)   |        | 229.73)  | 126.56)  | -1.72)  |        | 3.25)  | 1.17)  | -3.22)  |        |
|                   |         |         |         |        | 1401.91)  | 1421.92)  |         |        |          |          |         |        |        |        |         |        |
|                   | 0.33    | 0.29    | -0.54   |        | 4.99      | 4.69      | -0.23   |        | 8.20     | 5.07     | -1.68   |        | 0.13   | 0.08   | -1.53   |        |
| Malta             | (0.00,  | (0.00,  | (-0.67, | <0.001 | (1.99,    | (1.79,    | (-0.27, | <0.001 | (4.16,   | (2.06,   | (-2.15, | <0.001 | (0.00, | (0.00, | (-2.57, | 0.005  |
|                   | 3.74)   | 4.38)   | -0.40)  |        | 10.58)    | 10.66)    | -0.18)  |        | 14.75)   | 11.08)   | -1.22)  |        | 3.41)  | 4.06)  | -0.47)  |        |
|                   | 44.19   | 44.67   | 0.04    |        | 786.10    | 801.37    | 0.06    |        | 815.85   | 659.67   | -0.74   |        | 12.90  | 10.37  | -0.76   |        |
| Marshall Islands  | (18.29, | (21.98, | (0.03,  | <0.001 | (657.38,  | (691.59,  | (0.04,  | <0.001 | (682.94, | (560.35, | (-0.83, | <0.001 | (1.64, | (1.69, | (-0.84, | <0.001 |
|                   | 92.06)  | 81.00)  | 0.05)   |        | 934.34)   | 923.82)   | 0.09)   |        | 968.57)  | 771.70)  | -0.65)  |        | 48.65) | 33.87) | -0.67)  |        |
|                   |         |         |         |        | 1231.08   | 1245.83   | 0.04    |        | 130.56   | 76.51    | -1.84   |        | 1.16   | 0.28   | -4.79   |        |
| Mauritania        | (65.63, | (67.71, | (-0.00, | 0.120  | (1205.93, | (1228.25, | (0.02,  | <0.001 | (122.52, | (72.21,  | (-1.93, | <0.001 | (0.52, | (0.08, | (-4.97, | <0.001 |
|                   | 77.64)  | 75.99)  | 0.03)   |        | ,         | ,         | 0.06)   |        | 139.03)  | 81.02)   | -1.74)  |        | 2.29)  | 0.72)  | -4.60)  |        |
|                   |         |         |         |        | 1256.66)  | 1263.61)  |         |        |          |          |         |        |        |        |         |        |
|                   | 40.17   | 38.77   | -0.12   |        | 756.50    | 755.06    | -0.01   |        | 164.38   | 67.75    | -2.94   |        | 2.12   | 0.52   | -4.64   |        |
| Mauritius         | (34.79, | (33.28, | (-0.14, | <0.001 | (732.56,  | (730.37,  | (-0.01, | 0.005  | (153.29, | (60.50,  | (-3.63, | <0.001 | (1.04, | (0.09, | (-5.98, | <0.001 |
|                   | 46.17)  | 44.92)  | -0.11)  |        | 781.04)   | 780.40)   | -0.00)  |        | 176.08)  | 75.65)   | -2.25)  |        | 3.87)  | 1.74)  | -3.27)  |        |
|                   | 31.23   | 26.99   | -0.49   |        | 566.23    | 491.29    | -0.49   |        | 96.95    | 33.13    | -3.59   |        | 1.21   | 0.16   | -6.65   |        |
| Mexico            | (30.66, | (26.54, | (-0.52, | <0.001 | (563.69,  | (489.35,  | (-0.51, | <0.001 | (95.88,  | (32.63,  | (-3.72, | <0.001 | (1.09, | (0.13, | (-7.13, | <0.001 |
|                   | 31.81)  | 27.45)  | -0.47)  |        | 568.77)   | 493.23)   | -0.46)  |        | 98.04)   | 33.63)   | -3.46)  |        | 1.34)  | 0.20)  | -6.16)  |        |
| Micronesia        | 44.28   | 44.41   | 0.02    |        | 782.27    | 793.30    | 0.05    |        | 851.73   | 587.90   | -1.28   |        | 13.71  | 9.16   | -1.39   |        |
| (Federated States | (25.89, | (26.50, | (0.00,  | 0.028  | (696.78,  | (709.92,  | (0.04,  | <0.001 | (760.76, | (515.51, | (-1.34, | <0.001 | (4.48, | (2.30, | (-1.47, | <0.001 |
| of)               | 71.60)  | 70.54)  | 0.03)   |        | 875.99)   | 884.31)   | 0.06)   |        | 951.11)  | 668.06)  | -1.22)  |        | 32.72) | 25.22) | -1.32)  |        |
|                   | 0.38    | 0.36    | -0.16   |        | 7.08      | 6.87      | -0.10   |        | 4.09     | 3.10     | -0.95   |        | 0.06   | 0.05   | -0.61   |        |
| Monaco            | (0.00,  | (0.00,  | (-0.24, | <0.001 | (0.03,    | (0.03,    | (-0.13, | <0.001 | (0.00,   | (0.00,   | (-1.01, | <0.001 | (0.00, | (0.00, | (-0.61, | <0.001 |
|                   | 61.97)  | 44.98)  | -0.08)  |        | 72.31)    | 56.78)    | -0.08)  |        | 67.61)   | 50.06)   | -0.89)  |        | 61.49) | 44.40) | -0.61)  |        |
| Mongolia          | 70.09   | 66.59   | -0.18   | <0.001 | 1139.88   | 1126.30   | -0.04   | <0.001 | 204.50   | 119.31   | -1.80   | <0.001 | 2.60   | 1.14   | -2.76   | <0.001 |

|             |                     |                     |                   |        |                           |                           |                   |        |                     |                     |                   |        |                   |                   |                   |
|-------------|---------------------|---------------------|-------------------|--------|---------------------------|---------------------------|-------------------|--------|---------------------|---------------------|-------------------|--------|-------------------|-------------------|-------------------|
|             | (64.73,<br>75.85)   | (62.13,<br>71.32)   | (-0.19,<br>-0.16) |        | (1117.09<br>,<br>1163.08) | (1108.31<br>,<br>1144.52) | (-0.05,<br>-0.03) |        | (194.54,<br>214.90) | (113.63,<br>125.24) | (-2.02,<br>-1.58) |        | (1.57,<br>4.12)   | (0.66,<br>1.88)   | (-3.16,<br>-2.37) |
|             | 1.28                | 1.16                | -0.30             |        | 10.04                     | 9.76                      | -0.08             |        | 28.88               | 13.01               | -2.91             |        | 0.49              | 0.22              | -2.99             |
| Montenegro  | (0.29,<br>3.65)     | (0.21,<br>3.85)     | (-0.52,<br>-0.07) | 0.010  | (6.52,<br>14.81)          | (6.08,<br>14.98)          | (-0.14,<br>-0.02) | 0.009  | (22.65,<br>36.33)   | (8.71,<br>18.82)    | (-3.90,<br>-1.92) | <0.001 | (0.02,<br>2.42)   | (0.00,<br>2.37)   | (-4.24,<br>-1.71) |
|             | 48.98               | 48.37               | -0.04             |        | 753.95                    | 767.44                    | 0.07              |        | 136.75              | 64.77               | -2.56             |        | 1.68              | 0.47              | -4.26             |
| Morocco     | (47.65,<br>50.34)   | (47.24,<br>49.51)   | (-0.05,<br>-0.02) | <0.001 | (748.57,<br>759.35)       | (762.96,<br>771.94)       | (0.04,<br>0.09)   | <0.001 | (134.46,<br>139.07) | (63.47,<br>66.09)   | (-2.71,<br>-2.42) | <0.001 | (1.43,<br>1.96)   | (0.37,<br>0.60)   | (-4.45,<br>-4.08) |
|             | 123.87              | 123.89              | -0.01             |        | 1965.01                   | 2022.86                   | 0.10              |        | 156.60              | 137.17              | -0.46             |        | 1.02              | 0.66              | -1.49             |
| Mozambique  | (120.72,<br>127.09) | (121.88,<br>125.93) | (-0.06,<br>0.04)  | 0.815  | (1951.97<br>,<br>1978.12) | (2014.34<br>,<br>2031.41) | (0.07,<br>0.14)   | <0.001 | (152.96,<br>160.30) | (134.97,<br>139.39) | (-0.50,<br>-0.42) | <0.001 | (0.75,<br>1.37)   | (0.52,<br>0.83)   | (-1.67,<br>-1.31) |
|             | 65.06               | 56.27               | -0.51             |        | 920.62                    | 856.77                    | -0.25             |        | 240.65              | 108.13              | -2.73             |        | 3.30              | 1.13              | -3.62             |
| Myanmar     | (63.86,<br>66.28)   | (55.29,<br>57.27)   | (-0.54,<br>-0.47) | <0.001 | (915.99,<br>925.26)       | (852.91,<br>860.64)       | (-0.31,<br>-0.19) | <0.001 | (238.27,<br>243.05) | (106.76,<br>109.51) | (-2.89,<br>-2.57) | <0.001 | (3.03,<br>3.60)   | (0.99,<br>1.27)   | (-3.77,<br>-3.48) |
|             | 91.43               | 89.95               | -0.06             |        | 1582.83                   | 1582.86                   | -0.00             |        | 186.27              | 114.27              | -1.67             |        | 1.85              | 0.64              | -3.56             |
| Namibia     | (83.76,<br>99.70)   | (84.28,<br>95.92)   | (-0.07,<br>-0.05) | <0.001 | (1549.08<br>,<br>1617.21) | (1558.45<br>,<br>1607.58) | (-0.02,<br>0.01)  | 0.638  | (174.71,<br>198.47) | (107.77,<br>121.08) | (-1.80,<br>-1.55) | <0.001 | (0.85,<br>3.59)   | (0.24,<br>1.40)   | (-3.85,<br>-3.26) |
|             | 14.28               | 11.43               | -0.79             |        | 129.05                    | 120.39                    | -0.27             |        | 595.22              | 491.28              | -0.66             |        | 9.85              | 8.06              | -0.69             |
| Nauru       | (0.03,<br>130.44)   | (0.01,<br>114.54)   | (-0.94,<br>-0.65) | <0.001 | (42.58,<br>304.18)        | (41.22,<br>278.51)        | (-0.38,<br>-0.16) | <0.001 | (379.70,<br>892.89) | (307.72,<br>748.36) | (-0.84,<br>-0.48) | <0.001 | (0.00,<br>122.18) | (0.00,<br>108.20) | (-0.89,<br>-0.50) |
|             | 68.89               | 65.44               | -0.17             |        | 810.35                    | 833.46                    | 0.11              |        | 514.55              | 219.01              | -2.90             |        | 8.07              | 3.02              | -3.33             |
| Nepal       | (67.02,<br>70.81)   | (64.07,<br>66.83)   | (-0.21,<br>-0.12) | <0.001 | (803.66,<br>817.09)       | (828.42,<br>838.53)       | (0.06,<br>0.16)   | <0.001 | (509.18,<br>519.96) | (216.42,<br>221.63) | (-3.12,<br>-2.68) | <0.001 | (7.40,<br>8.78)   | (2.72,<br>3.34)   | (-3.52,<br>-3.14) |
|             | 0.37                | 0.36                | -0.09             |        | 6.57                      | 6.74                      | 0.10              |        | 4.18                | 2.30                | -2.06             |        | 0.07              | 0.03              | -2.17             |
| Netherlands | (0.23,<br>0.56)     | (0.21,<br>0.56)     | (-0.31,<br>0.12)  | 0.403  | (5.94,<br>7.26)           | (6.06,<br>7.47)           | (0.06,<br>0.13)   | <0.001 | (3.68,<br>4.72)     | (1.92,<br>2.75)     | (-2.35,<br>-1.77) | <0.001 | (0.02,<br>0.17)   | (0.00,<br>0.13)   | (-3.23,<br>-1.10) |
|             | 1.91                | 0.93                | -2.50             |        | 30.41                     | 24.03                     | -0.81             |        | 74.13               | 30.22               | -2.97             |        | 1.22              | 0.50              | -2.98             |
| New Zealand | (1.25,<br>2.79)     | (0.50,<br>1.59)     | (-2.67,<br>-2.33) | <0.001 | (27.57,<br>33.46)         | (21.54,<br>26.73)         | (-0.93,<br>-0.69) | <0.001 | (69.67,<br>78.81)   | (27.44,<br>33.21)   | (-3.52,<br>-2.42) | <0.001 | (0.71,<br>1.96)   | (0.20,<br>1.03)   | (-3.53,<br>-2.42) |
|             | 71.97               | 72.34               | 0.03              | 0.506  | 1316.49                   | 1340.01                   | 0.06              | <0.001 | 120.54              | 75.64               | -1.62             | <0.001 | 0.97              | 0.19              | -5.58             |
| Nicaragua   |                     |                     |                   |        |                           |                           |                   |        |                     |                     |                   |        |                   |                   |                   |

|                             |                   |                   |                   |        |                           |                           |                   |        |                     |                     |                   |                   |                   |                   |        |
|-----------------------------|-------------------|-------------------|-------------------|--------|---------------------------|---------------------------|-------------------|--------|---------------------|---------------------|-------------------|-------------------|-------------------|-------------------|--------|
|                             | (67.76,<br>76.40) | (69.25,<br>75.54) | (-0.06,<br>0.12)  |        | (1297.40<br>,<br>1335.83) | (1326.47<br>,<br>1353.66) | (0.05,<br>0.07)   |        | (114.78,<br>126.54) | (72.45,<br>78.94)   | (-1.88,<br>-1.37) | (0.51,<br>1.70)   | (0.06,<br>0.44)   | (-6.43,<br>-4.72) |        |
|                             | 74.76             | 78.70             | 0.18              |        | 1155.78                   | 1221.93                   | 0.20              |        | 166.51              | 110.21              | -1.40             | 1.80              | 0.84              | -2.54             |        |
| Niger                       | (71.60,<br>78.04) | (76.78,<br>80.66) | (0.17,<br>0.20)   | <0.001 | (1142.84<br>,<br>1168.83) | (1213.99<br>,<br>1229.92) | (0.18,<br>0.21)   | <0.001 | (161.67,<br>171.48) | (107.85,<br>112.62) | (-1.56,<br>-1.24) | (1.33,<br>2.41)   | (0.65,<br>1.09)   | (-2.84,<br>-2.25) | <0.001 |
|                             | 74.44             | 78.00             | 0.16              |        | 1248.75                   | 1338.22                   | 0.24              |        | 137.99              | 86.80               | -1.61             | 1.28              | 0.38              | -4.11             |        |
| Nigeria                     | (73.54,<br>75.35) | (77.41,<br>78.60) | (0.15,<br>0.17)   | <0.001 | (1244.92<br>,<br>1252.59) | (1335.69<br>,<br>1340.77) | (0.23,<br>0.25)   | <0.001 | (136.73,<br>139.27) | (86.16,<br>87.45)   | (-1.75,<br>-1.48) | (1.16,<br>1.41)   | (0.34,<br>0.42)   | (-4.30,<br>-3.92) | <0.001 |
|                             | 8.13              | 5.96              | -1.07             |        | 92.18                     | 91.32                     | -0.04             |        | 335.79              | 195.86              | -1.85             | 5.50              | 3.11              | -1.95             |        |
| Niue                        | (0.00,<br>534.04) | (0.00,<br>743.82) | (-1.09,<br>-1.04) | <0.001 | (0.67,<br>687.19)         | (0.10,<br>902.03)         | (-0.07,<br>-0.00) | 0.036  | (58.97,<br>1078.69) | (6.35,<br>1082.31)  | (-2.07,<br>-1.63) | (0.00,<br>528.62) | (0.00,<br>738.22) | (-2.17,<br>-1.74) | <0.001 |
|                             | 1.65              | 1.13              | -1.23             |        | 13.07                     | 9.63                      | -1.03             |        | 56.86               | 13.29               | -4.91             | 0.97              | 0.22              | -5.05             |        |
| North Macedonia             | (0.89,<br>2.79)   | (0.53,<br>2.21)   | (-1.43,<br>-1.04) | <0.001 | (10.71,<br>15.80)         | (7.62,<br>12.09)          | (-1.16,<br>-0.91) | <0.001 | (51.81,<br>62.27)   | (10.89,<br>16.14)   | (-5.22,<br>-4.59) | (0.42,<br>1.92)   | (0.02,<br>1.00)   | (-5.38,<br>-4.73) | <0.001 |
|                             | 33.86             | 35.85             | 0.20              |        | 825.65                    | 859.25                    | 0.14              |        | 187.38              | 125.48              | -1.38             | 2.48              | 1.41              | -1.94             |        |
| Northern Mariana<br>Islands | (14.38,<br>69.34) | (10.89,<br>95.43) | (0.15,<br>0.24)   | <0.001 | (712.57,<br>952.81)       | (704.68,<br>1042.40)      | (0.09,<br>0.18)   | <0.001 | (136.34,<br>252.85) | (69.75,<br>213.39)  | (-1.53,<br>-1.22) | (0.01,<br>24.11)  | (0.00,<br>45.92)  | (-2.13,<br>-1.74) | <0.001 |
|                             | 0.27              | 0.25              | -0.02             |        | 4.55                      | 4.78                      | 0.18              |        | 4.46                | 1.28                | -4.22             | 0.07              | 0.02              | -4.24             |        |
| Norway                      | (0.08,<br>0.68)   | (0.08,<br>0.64)   | (-0.45,<br>0.41)  | 0.923  | (3.57,<br>5.73)           | (3.82,<br>5.93)           | (0.16,<br>0.20)   | <0.001 | (3.49,<br>5.62)     | (0.81,<br>1.93)     | (-4.54,<br>-3.90) | (0.00,<br>0.38)   | (0.00,<br>0.28)   | (-5.25,<br>-3.21) | <0.001 |
|                             | 0.77              | 0.82              | 0.26              |        | 12.54                     | 13.79                     | 0.37              |        | 14.30               | 3.35                | -4.86             | 0.23              | 0.04              | -5.59             |        |
| Oman                        | (0.29,<br>1.68)   | (0.50,<br>1.35)   | (0.09,<br>0.44)   | 0.003  | (10.20,<br>15.25)         | (12.31,<br>15.45)         | (0.26,<br>0.48)   | <0.001 | (11.81,<br>17.17)   | (2.62,<br>4.26)     | (-5.22,<br>-4.50) | (0.02,<br>0.89)   | (0.00,<br>0.37)   | (-6.03,<br>-5.14) | <0.001 |
|                             | 87.07             | 91.93             | 0.19              |        | 1147.27                   | 1224.62                   | 0.26              |        | 569.20              | 474.21              | -0.61             | 8.68              | 6.95              | -0.75             |        |
| Pakistan                    | (86.18,<br>87.97) | (91.32,<br>92.55) | (0.07,<br>0.32)   | 0.003  | (1143.86<br>,<br>1150.70) | (1222.29<br>,<br>1226.95) | (0.17,<br>0.34)   | <0.001 | (566.76,<br>571.64) | (472.76,<br>475.66) | (-0.76,<br>-0.47) | (8.38,<br>8.99)   | (6.77,<br>7.13)   | (-0.90,<br>-0.60) | <0.001 |
|                             | 6.13              | 4.77              | -0.85             |        | 72.73                     | 69.40                     | -0.16             |        | 232.47              | 155.21              | -1.37             | 3.79              | 2.51              | -1.41             |        |
| Palau                       | (0.00,<br>70.53)  | (0.00,<br>77.45)  | (-0.90,<br>-0.81) | <0.001 | (23.66,<br>172.45)        | (19.86,<br>178.08)        | (-0.18,<br>-0.15) | <0.001 | (133.15,<br>379.32) | (72.51,<br>294.32)  | (-1.46,<br>-1.28) | (0.00,<br>66.12)  | (0.00,<br>73.53)  | (-1.51,<br>-1.30) | <0.001 |



|                  |         |         |         |        |           |           |         |        |          |          |         |        |        |        |         |        |
|------------------|---------|---------|---------|--------|-----------|-----------|---------|--------|----------|----------|---------|--------|--------|--------|---------|--------|
|                  | 42.62   | 42.02   | -0.05   |        | 728.91    | 741.53    | 0.06    |        | 61.87    | 42.63    | -1.28   |        | 0.46   | 0.13   | -4.32   |        |
| Palestine        | (38.10, | (39.30, | (-0.07, | <0.001 | (708.82,  | (729.63,  | (0.05,  | <0.001 | (56.06,  | (39.80,  | (-1.34, | <0.001 | (0.09, | (0.02, | (-4.71, | <0.001 |
|                  | 47.63)  | 44.89)  | -0.03)  |        | 749.50)   | 753.60)   | 0.08)   |        | 68.18)   | 45.62)   | -1.22)  |        | 1.49)  | 0.44)  | -3.94)  |        |
|                  |         |         |         |        | 1230.13   | 1202.60   | -0.08   |        | 150.79   | 79.76    | -2.16   |        | 1.53   | 0.37   | -4.76   |        |
| Panama           | (60.54, | (57.40, | (-0.25, | <0.001 | (1208.30, | (1185.64, | (-0.09, | <0.001 | (143.19, | (75.43,  | (-2.67, | <0.001 | (0.85, | (0.14, | (-5.85, | <0.001 |
|                  | 70.50)  | 65.11)  | -0.20)  |        | '         | '         | -0.07)  |        | 158.71)  | 84.27)   | -1.64)  |        | 2.57)  | 0.82)  | -3.66)  |        |
|                  |         |         |         |        | 1252.27)  | 1219.75)  |         |        |          |          |         |        |        |        |         |        |
|                  | 43.76   | 44.72   | 0.08    |        | 743.41    | 774.80    | 0.14    |        | 707.24   | 635.51   | -0.41   |        | 11.30  | 9.98   | -0.48   |        |
| Papua New Guinea | (40.59, | (42.69, | (0.07,  | <0.001 | (730.15,  | (766.27,  | (0.13,  | <0.001 | (694.03, | (627.72, | (-0.63, | <0.001 | (9.67, | (9.02, | (-0.70, | <0.001 |
|                  | 47.13)  | 46.83)  | 0.09)   |        | 756.87)   | 783.42)   | 0.16)   |        | 720.66)  | 643.37)  | -0.20)  |        | 13.14) | 11.01) | -0.26)  |        |
|                  |         |         |         |        | 1288.30   | 1279.70   | -0.02   |        | 105.60   | 81.20    | -0.86   |        | 0.74   | 0.34   | -2.53   |        |
| Paraguay         | (64.19, | (62.97, | (-0.14, | <0.001 | (1270.38, | (1266.86, | (-0.03, | <0.001 | (100.50, | (77.99,  | (-1.13, | <0.001 | (0.37, | (0.16, | (-3.51, | <0.001 |
|                  | 72.33)  | 68.82)  | -0.09)  |        | '         | '         | -0.02)  |        | 110.91)  | 84.52)   | -0.59)  |        | 1.34)  | 0.63)  | -1.54)  |        |
|                  |         |         |         |        | 1306.42)  | 1292.64)  |         |        |          |          |         |        |        |        |         |        |
|                  | 64.07   | 63.59   | -0.03   |        | 1159.60   | 1183.14   | 0.06    |        | 98.38    | 68.71    | -1.25   |        | 0.72   | 0.20   | -4.24   |        |
| Peru             | (62.43, | (62.25, | (-0.06, | 0.078  | (1152.39, | (1177.37, | (0.03,  | <0.001 | (96.27,  | (67.33,  | (-1.51, | <0.001 | (0.55, | (0.14, | (-5.59, | <0.001 |
|                  | 65.74)  | 64.94)  | 0.00)   |        | '         | '         | 0.08)   |        | 100.52)  | 70.11)   | -0.99)  |        | 0.94)  | 0.30)  | -2.87)  |        |
|                  |         |         |         |        | 1166.85)  | 1188.92)  |         |        |          |          |         |        |        |        |         |        |
|                  | 36.82   | 35.80   | -0.10   |        | 540.36    | 589.42    | 0.30    |        | 102.88   | 173.97   | 1.92    |        | 1.27   | 2.39   | 2.31    |        |
| Philippines      | (36.09, | (35.26, | (-0.11, | <0.001 | (537.47,  | (587.20,  | (0.23,  | <0.001 | (101.62, | (172.76, | (1.37,  | <0.001 | (1.14, | (2.25, | (1.62,  | <0.001 |
|                  | 37.56)  | 36.34)  | -0.09)  |        | 543.26)   | 591.65)   | 0.38)   |        | 104.15)  | 175.18)  | 2.47)   |        | 1.43)  | 2.54)  | 3.00)   |        |
|                  | 2.88    | 1.35    | -2.55   |        | 19.83     | 13.28     | -1.38   |        | 87.49    | 9.14     | -7.81   |        | 1.52   | 0.14   | -8.13   |        |
| Poland           | (2.62,  | (1.17,  | (-2.74, | <0.001 | (19.13,   | (12.66,   | (-1.50, | <0.001 | (86.02,  | (8.64,   | (-8.32, | <0.001 | (1.33, | (0.09, | (-8.64, | <0.001 |
|                  | 3.16)   | 1.56)   | -2.35)  |        | 20.55)    | 13.92)    | -1.26)  |        | 88.97)   | 9.67)    | -7.30)  |        | 1.73)  | 0.23)  | -7.63)  |        |
|                  | 1.10    | 0.50    | -2.76   |        | 12.13     | 7.83      | -1.51   |        | 44.17    | 8.35     | -5.64   |        | 0.74   | 0.14   | -5.62   |        |
| Portugal         | (0.79,  | (0.29,  | (-3.09, | <0.001 | (11.04,   | (6.87,    | (-1.58, | <0.001 | (42.07,  | (7.38,   | (-6.60, | <0.001 | (0.49, | (0.04, | (-6.78, | <0.001 |
|                  | 1.49)   | 0.82)   | -2.42)  |        | 13.29)    | 8.89)     | -1.44)  |        | 46.35)   | 9.42)    | -4.67)  |        | 1.07)  | 0.35)  | -4.43)  |        |
|                  | 0.98    | 0.82    | -0.61   |        | 18.21     | 16.95     | -0.25   |        | 25.16    | 9.83     | -3.29   |        | 0.41   | 0.15   | -3.44   |        |
| Puerto Rico      | (0.53,  | (0.38,  | (-0.74, | <0.001 | (16.05,   | (14.63,   | (-0.31, | <0.001 | (22.59,  | (8.09,   | (-3.91, | <0.001 | (0.15, | (0.01, | (-4.13, | <0.001 |
|                  | 1.65)   | 1.55)   | -0.49)  |        | 20.60)    | 19.53)    | -0.18)  |        | 27.94)   | 11.83)   | -2.67)  |        | 0.91)  | 0.61)  | -2.74)  |        |
|                  | 1.16    | 0.71    | -1.68   |        | 19.36     | 13.16     | -1.35   |        | 36.76    | 7.53     | -5.38   |        | 0.58   | 0.11   | -5.57   |        |
| Qatar            | (0.22,  | (0.34,  | (-1.78, | <0.001 | (14.03,   | (11.27,   | (-1.48, | <0.001 | (28.87,  | (6.06,   | (-5.71, | <0.001 | (0.03, | (0.01, | (-5.95, | <0.001 |
|                  | 4.45)   | 1.61)   | -1.57)  |        | 26.52)    | 15.43)    | -1.21)  |        | 46.51)   | 9.43)    | -5.05)  |        | 3.72)  | 0.89)  | -5.18)  |        |

|                    |          |          |         |        |          |          |         |        |          |          |         |        |        |        |         |        |
|--------------------|----------|----------|---------|--------|----------|----------|---------|--------|----------|----------|---------|--------|--------|--------|---------|--------|
|                    | 0.45     | 0.33     | -1.07   |        | 10.23    | 9.32     | -0.32   |        | 13.40    | 2.69     | -5.36   |        | 0.21   | 0.04   | -5.54   |        |
| Republic of Korea  | (0.36,   | (0.25,   | (-1.22, | <0.001 | (9.80,   | (8.87,   | (-0.36, | <0.001 | (12.91,  | (2.45,   | (-5.79, | <0.001 | (0.15, | (0.01, | (-6.76, | <0.001 |
|                    | 0.55)    | 0.43)    | -0.92)  |        | 10.68)   | 9.80)    | -0.28)  |        | 13.91)   | 2.95)    | -4.93)  |        | 0.29)  | 0.08)  | -4.30)  |        |
| Republic of        | 9.08     | 2.75     | -4.05   |        | 58.84    | 23.94    | -3.06   |        | 198.82   | 30.42    | -6.42   |        | 3.38   | 0.50   | -6.49   |        |
| Moldova            | (7.77,   | (1.98,   | (-4.24, | <0.001 | (55.37,  | (21.42,  | (-3.15, | <0.001 | (192.36, | (27.57,  | (-6.86, | <0.001 | (2.58, | (0.20, | (-6.95, | <0.001 |
|                    | 10.56)   | 3.79)    | -3.86)  |        | 62.48)   | 26.72)   | -2.97)  |        | 205.46)  | 33.53)   | -5.97)  |        | 4.35)  | 1.11)  | -6.02)  |        |
|                    | 3.65     | 1.46     | -3.12   |        | 23.79    | 13.29    | -2.05   |        | 118.09   | 14.61    | -6.93   |        | 2.05   | 0.24   | -7.13   |        |
| Romania            | (3.26,   | (1.17,   | (-3.32, | <0.001 | (22.78,  | (12.38,  | (-2.27, | <0.001 | (115.82, | (13.64,  | (-7.51, | <0.001 | (1.77, | (0.13, | (-7.74, | <0.001 |
|                    | 4.08)    | 1.80)    | -2.92)  |        | 24.83)   | 14.26)   | -1.83)  |        | 120.39)  | 15.64)   | -6.35)  |        | 2.38)  | 0.40)  | -6.52)  |        |
|                    | 6.56     | 3.40     | -2.23   |        | 52.77    | 38.24    | -1.08   |        | 86.88    | 12.84    | -6.50   |        | 1.47   | 0.19   | -6.98   |        |
| Russian Federation | (6.36,   | (3.24,   | (-2.43, | <0.001 | (52.19,  | (37.69,  | (-1.17, | <0.001 | (86.15,  | (12.53,  | (-8.08, | <0.001 | (1.38, | (0.16, | (-8.74, | <0.001 |
|                    | 6.76)    | 3.57)    | -2.04)  |        | 53.36)   | 38.80)   | -0.99)  |        | 87.62)   | 13.16)   | -4.90)  |        | 1.57)  | 0.23)  | -5.18)  |        |
|                    | 110.71   | 110.30   | -0.02   |        | 1821.65  | 1846.81  | 0.05    |        | 265.56   | 127.11   | -2.51   |        | 2.88   | 0.63   | -5.11   |        |
| Rwanda             | (106.87, | (107.56, | (-0.03, | 0.010  | (1805.47 | (1835.29 | (0.04,  | <0.001 | (259.45, | (124.11, | (-2.73, | <0.001 | (2.27, | (0.44, | (-5.37, | <0.001 |
|                    | 114.67)  | 113.09)  | -0.00)  |        | ,        | ,        | 0.06)   |        | 271.78)  | 130.16)  | -2.30)  |        | 3.61)  | 0.89)  | -4.84)  |        |
|                    | 3.63     | 1.07     | -4.12   |        | 40.96    | 18.97    | -2.65   |        | 148.27   | 24.47    | -5.92   |        | 2.52   | 0.38   | -6.09   |        |
| Saint Kitts and    | (0.01,   | (0.00,   | (-4.35, | <0.001 | (16.20,  | (5.53,   | (-2.75, | <0.001 | (95.36,  | (8.50,   | (-6.82, | <0.001 | (0.00, | (0.00, | (-7.14, | <0.001 |
| Nevis              | 32.24)   | 20.22)   | -3.90)  |        | 87.01)   | 48.08)   | -2.55)  |        | 221.24)  | 55.95)   | -5.01)  |        | 30.34) | 18.95) | -5.03)  |        |
|                    | 70.21    | 68.49    | -0.08   |        | 1328.08  | 1320.82  | -0.02   |        | 216.97   | 114.80   | -2.14   |        | 2.62   | 0.88   | -3.64   |        |
| Saint Lucia        | (50.29,  | (50.01,  | (-0.09, | <0.001 | (1231.99 | (1235.55 | (-0.02, | <0.001 | (178.32, | (90.74,  | (-2.48, | <0.001 | (0.13, | (0.00, | (-4.20, | <0.001 |
|                    | 96.54)   | 91.72)   | -0.07)  |        | ,        | ,        | -0.01)  |        | 262.20)  | 143.48)  | -1.79)  |        | 13.77) | 7.62)  | -3.07)  |        |
|                    | 72.64    | 70.17    | -0.12   |        | 1288.33  | 1275.95  | -0.03   |        | 210.58   | 128.14   | -1.64   |        | 2.51   | 1.13   | -2.62   |        |
| Saint Vincent and  | (50.38,  | (47.15,  | (-0.13, | <0.001 | (1183.86 | (1170.09 | (-0.04, | <0.001 | (169.06, | (96.18,  | (-2.38, | <0.001 | (0.07, | (0.00, | (-3.83, | <0.001 |
| the Grenadines     | 102.94)  | 100.67)  | -0.11)  |        | ,        | ,        | -0.02)  |        | 260.25)  | 167.46)  | -0.89)  |        | 15.95) | 11.36) | -1.39)  |        |
|                    | 40.91    | 41.28    | 0.03    |        | 815.05   | 839.31   | 0.10    |        | 414.95   | 339.29   | -0.67   |        | 6.30   | 5.00   | -0.77   |        |
| Samoa              | (26.62,  | (28.50,  | (0.03,  | <0.001 | (745.47, | (777.23, | (0.10,  | <0.001 | (364.36, | (299.66, | (-0.74, | <0.001 | (1.55, | (1.31, | (-0.86, | <0.001 |
|                    | 61.18)   | 58.25)   | 0.04)   |        | 890.13)  | 905.36)  | 0.11)   |        | 471.29)  | 383.00)  | -0.60)  |        | 18.17) | 13.56) | -0.68)  |        |
|                    | 0.45     | 0.42     | -0.22   |        | 7.32     | 7.08     | -0.11   |        | 8.03     | 6.50     | -0.74   |        | 0.13   | 0.10   | -0.77   |        |
| San Marino         | (0.00,   | (0.00,   | (-0.39, | 0.011  | (0.03,   | (0.06,   | (-0.14, | <0.001 | (0.06,   | (0.04,   | (-0.95, | <0.001 | (0.00, | (0.00, | (-1.87, | 0.178  |
|                    | 44.70)   | 40.12)   | -0.05)  |        | 57.53)   | 52.21)   | -0.09)  |        | 58.84)   | 51.10)   | -0.53)  |        | 44.05) | 39.52) | 0.35)   |        |

|                       |         |         |         |        |          |          |         |        |          |          |         |        |         |        |         |        |
|-----------------------|---------|---------|---------|--------|----------|----------|---------|--------|----------|----------|---------|--------|---------|--------|---------|--------|
| Sao Tome and Principe | 68.66   | 73.14   | 0.22    |        | 1230.36  | 1333.91  | 0.28    |        | 135.64   | 113.43   | -0.70   | 1.28   | 0.81    | -1.79  |         |        |
|                       | (46.16, | (56.45, | (0.20,  | <0.001 | (1122.77 | (1257.43 | (0.27,  | <0.001 | (101.18, | (92.00,  | (-1.17, | 0.004  | (0.00,  | (0.00, | (-2.55, | <0.001 |
|                       | 100.38) | 93.50)  | 0.23)   |        | ,        | ,        | 0.29)   |        | 179.53)  | 138.58)  | -0.23)  |        | 15.84)  | 6.40)  | -1.02)  |        |
| Saudi Arabia          | 1.68    | 1.21    | -1.13   |        | 22.21    | 16.82    | -0.96   |        | 76.70    | 20.51    | -4.46   | 1.28   | 0.34    | -4.50  |         |        |
|                       | (1.37,  | (1.06,  | (-1.22, | <0.001 | (21.07,  | (16.23,  | (-1.00, | <0.001 | (74.56,  | (19.87,  | (-4.88, | <0.001 | (1.01,  | (0.26, | (-5.00, | <0.001 |
|                       | 2.04)   | 1.38)   | -1.03)  |        | 23.40)   | 17.43)   | -0.93)  |        | 78.89)   | 21.16)   | -4.04)  |        | 1.59)   | 0.43)  | -3.99)  |        |
| Senegal               | 73.86   | 75.61   | 0.08    |        | 1233.62  | 1277.55  | 0.11    |        | 125.85   | 90.34    | -1.17   | 1.08   | 0.47    | -2.80  |         |        |
|                       | (70.71, | (73.48, | (0.06,  | <0.001 | (1220.16 | (1268.44 | (0.05,  | <0.001 | (121.62, | (87.94,  | (-1.37, | <0.001 | (0.72,  | (0.31, | (-3.24, | <0.001 |
|                       | 77.13)  | 77.81)  | 0.10)   |        | ,        | ,        | 0.17)   |        | 130.21)  | 92.80)   | -0.97)  |        | 1.58)   | 0.69)  | -2.36)  |        |
| Serbia                | 0.89    | 1.08    | 0.66    |        | 7.15     | 8.42     | 0.52    |        | 12.70    | 3.29     | -4.58   | 0.21   | 0.05    | -4.80  |         |        |
|                       | (0.61,  | (0.75,  | (0.45,  | <0.001 | (6.30,   | (7.41,   | (0.43,  | <0.001 | (11.56,  | (2.67,   | (-5.10, | <0.001 | (0.09,  | (0.00, | (-5.43, | <0.001 |
|                       | 1.26)   | 1.53)   | 0.87)   |        | 8.09)    | 9.54)    | 0.61)   |        | 13.94)   | 4.02)    | -4.05)  |        | 0.43)   | 0.24)  | -4.17)  |        |
| Seychelles            | 41.04   | 38.62   | -0.21   |        | 773.55   | 740.03   | -0.15   |        | 166.79   | 58.46    | -3.52   | 2.19   | 0.38    | -5.77  |         |        |
|                       | (21.79, | (21.24, | (-0.22, | <0.001 | (677.78, | (656.38, | (-0.17, | <0.001 | (123.51, | (36.84,  | (-3.77, | <0.001 | (0.01,  | (0.00, | (-6.11, | <0.001 |
|                       | 72.37)  | 65.24)  | -0.20)  |        | 880.31)  | 831.99)  | -0.14)  |        | 221.66)  | 88.94)   | -3.28)  |        | 19.91)  | 12.31) | -5.42)  |        |
| Sierra Leone          | 78.21   | 82.72   | 0.19    |        | 1216.94  | 1290.41  | 0.20    |        | 137.53   | 104.97   | -0.91   | 1.29   | 0.71    | -2.06  |         |        |
|                       | (73.63, | (79.76, | (0.18,  | <0.001 | (1198.29 | (1278.31 | (0.19,  | <0.001 | (131.34, | (101.55, | (-0.99, | <0.001 | (0.75,  | (0.45, | (-2.35, | <0.001 |
|                       | 83.02)  | 85.77)  | 0.20)   |        | ,        | ,        | 0.21)   |        | 143.94)  | 108.49)  | -0.83)  |        | 2.08)   | 1.07)  | -1.78)  |        |
| Singapore             | 1.21    | 0.38    | -4.02   |        | 18.11    | 10.19    | -2.03   |        | 41.87    | 4.99     | -7.12   | 0.70   | 0.07    | -7.60  |         |        |
|                       | (0.72,  | (0.17,  | (-4.34, | <0.001 | (16.03,  | (8.82,   | (-2.21, | <0.001 | (38.69,  | (4.07,   | (-7.87, | <0.001 | (0.35,  | (0.01, | (-8.35, | <0.001 |
|                       | 1.93)   | 0.83)   | -3.70)  |        | 20.41)   | 11.76)   | -1.85)  |        | 45.25)   | 6.11)    | -6.36)  |        | 1.29)   | 0.42)  | -6.83)  |        |
| Slovakia              | 1.38    | 1.54    | 0.39    |        | 12.68    | 14.15    | 0.35    |        | 17.61    | 6.87     | -3.25   | 0.30   | 0.11    | -3.47  |         |        |
|                       | (0.93,  | (1.05,  | (0.28,  | <0.001 | (11.20,  | (12.51,  | (0.29,  | <0.001 | (15.87,  | (5.75,   | (-3.67, | <0.001 | (0.11,  | (0.01, | (-4.15, | <0.001 |
|                       | 1.98)   | 2.23)   | 0.49)   |        | 14.30)   | 15.98)   | 0.41)   |        | 19.49)   | 8.18)    | -2.82)  |        | 0.65)   | 0.46)  | -2.78)  |        |
| Slovenia              | 0.92    | 0.91    | -0.09   |        | 6.63     | 7.01     | 0.16    |        | 16.49    | 5.07     | -4.02   | 0.28   | 0.08    | -4.49  |         |        |
|                       | (0.39,  | (0.34,  | (-0.37, | 0.506  | (4.97,   | (5.11,   | (0.08,  | <0.001 | (13.83,  | (3.49,   | (-5.07, | <0.001 | (0.04,  | (0.00, | (-4.84, | <0.001 |
|                       | 1.90)   | 2.13)   | 0.18)   |        | 8.71)    | 9.51)    | 0.24)   |        | 19.56)   | 7.25)    | -2.97)  |        | 1.02)   | 1.00)  | -4.15)  |        |
| Solomon Islands       | 47.79   | 48.14   | 0.03    |        | 771.72   | 785.44   | 0.06    |        | 1136.09  | 864.51   | -0.95   | 18.77  | 14.07   | -1.00  |         |        |
|                       | (36.19, | (40.04, | (0.02,  | <0.001 | (722.83, | (751.64, | (0.05,  | <0.001 | (1073.64 | (828.30, | (-1.09, | <0.001 | (11.45, | (9.77, | (-1.14, | <0.001 |
|                       | 62.36)  | 57.46)  | 0.05)   |        | 823.40)  | 820.43)  | 0.07)   |        | ,        | 901.93)  | -0.80)  |        | 29.35)  | 19.66) | -0.86)  |        |

|              |          |          |         |        |          |          |         |        | 1201.48) |          |         |        |        |        |         |        |
|--------------|----------|----------|---------|--------|----------|----------|---------|--------|----------|----------|---------|--------|--------|--------|---------|--------|
|              | 119.46   | 127.31   | 0.21    |        | 1874.55  | 1977.47  |         |        |          |          |         |        |        |        |         |        |
|              | (115.27, | (124.86, | (0.19,  | <0.001 | (1857.28 | (1967.38 | 0.18    |        | 251.24   | 188.08   | -0.99   |        | 2.61   | 1.51   | -1.87   |        |
| Somalia      | 123.78)  | 129.79)  | 0.24)   |        | ,        | ,        | (0.17,  | <0.001 | (245.02, | (185.02, | (-1.10, | <0.001 | (2.01, | (1.24, | (-2.03, | <0.001 |
|              |          |          |         |        |          |          | 0.19)   |        | 257.59)  | 191.18)  | -0.88)  |        | 3.35)  | 1.81)  | -1.72)  |        |
|              |          |          |         |        | 1891.95) | 1987.61) |         |        |          |          |         |        |        |        |         |        |
|              |          |          |         |        | 1728.18  | 1755.31  |         |        |          |          |         |        |        |        |         |        |
|              | 99.23    | 99.91    | 0.02    |        | (1721.67 | (1749.99 | 0.05    |        | 236.02   | 119.46   | -2.38   |        | 2.61   | 0.61   | -4.92   |        |
| South Africa | (97.71,  | (98.62,  | (0.02,  | <0.001 | ,        | ,        | (0.03,  | <0.001 | (233.58, | (118.08, | (-3.03, | <0.001 | (2.35, | (0.52, | (-6.15, | <0.001 |
|              | 100.77)  | 101.21)  | 0.03)   |        |          |          | 0.07)   |        | 238.48)  | 120.85)  | -1.73)  |        | 2.88)  | 0.72)  | -3.68)  |        |
|              |          |          |         |        | 1734.72) | 1760.65) |         |        |          |          |         |        |        |        |         |        |
|              |          |          |         |        | 1674.24  | 1755.51  |         |        |          |          |         |        |        |        |         |        |
|              | 88.15    | 91.82    | 0.14    |        | (1657.11 | (1740.86 | 0.16    |        | 155.83   | 123.76   | -0.74   |        | 1.24   | 0.65   | -2.08   |        |
| South Sudan  | (84.44,  | (88.67,  | (0.13,  | <0.001 | ,        | ,        | (0.15,  | <0.001 | (150.67, | (119.93, | (-0.91, | <0.001 | (0.81, | (0.41, | (-2.47, | <0.001 |
|              | 92.01)   | 95.07)   | 0.15)   |        |          |          | 0.18)   |        | 161.13)  | 127.70)  | -0.57)  |        | 1.83)  | 1.01)  | -1.68)  |        |
|              |          |          |         |        | 1691.52) | 1770.27) |         |        |          |          |         |        |        |        |         |        |
|              | 0.77     | 0.40     | -2.27   |        | 8.68     | 6.73     | -0.88   |        | 25.50    | 5.66     | -5.14   |        | 0.43   | 0.09   | -5.26   |        |
| Spain        | (0.63,   | (0.30,   | (-2.50, | <0.001 | (8.21,   | (6.29,   | (-0.95, | <0.001 | (24.69,  | (5.26,   | (-5.56, | <0.001 | (0.33, | (0.05, | (-5.95, | <0.001 |
|              | 0.93)    | 0.52)    | -2.04)  |        | 9.17)    | 7.20)    | -0.82)  |        | 26.34)   | 6.07)    | -4.72)  |        | 0.55)  | 0.16)  | -4.56)  |        |
|              | 2.70     | 1.71     | -1.55   |        | 27.92    | 24.16    | -0.48   |        | 81.95    | 18.44    | -4.95   |        | 1.34   | 0.28   | -5.18   |        |
| Sri Lanka    | (2.33,   | (1.44,   | (-1.71, | <0.001 | (26.72,  | (23.10,  | (-0.57, | <0.001 | (79.89,  | (17.51,  | (-5.88, | <0.001 | (1.09, | (0.18, | (-6.10, | <0.001 |
|              | 3.11)    | 2.02)    | -1.39)  |        | 29.17)   | 25.25)   | -0.40)  |        | 84.06)   | 19.40)   | -4.02)  |        | 1.64)  | 0.43)  | -4.24)  |        |
|              | 53.81    | 54.60    | 0.05    |        | 767.25   | 806.58   | 0.19    |        | 183.35   | 82.06    | -2.72   |        | 2.44   | 0.73   | -4.07   |        |
| Sudan        | (52.18,  | (53.51,  | (0.03,  | <0.001 | (760.84, | (802.27, | (0.13,  | <0.001 | (180.21, | (80.68,  | (-2.76, | <0.001 | (2.09, | (0.60, | (-4.24, | <0.001 |
|              | 55.49)   | 55.71)   | 0.07)   |        | 773.70)  | 810.91)  | 0.24)   |        | 186.53)  | 83.45)   | -2.68)  |        | 2.85)  | 0.87)  | -3.90)  |        |
|              |          |          |         |        | 1202.76  | 1210.74  |         |        |          |          |         |        |        |        |         |        |
|              | 69.05    | 67.72    | -0.07   |        | (1148.69 | (1164.63 | 0.02    |        | 151.64   | 102.05   | -1.29   |        | 1.58   | 0.74   | -2.45   |        |
| Suriname     | (56.96,  | (57.15,  | (-0.08, | <0.001 | ,        | ,        | (0.01,  | 0.011  | (132.65, | (88.99,  | (-2.06, | 0.001  | (0.23, | (0.06, | (-3.90, | 0.001  |
|              | 83.29)   | 79.69)   | -0.05)  |        |          |          | 0.03)   |        | 172.85)  | 116.52)  | -0.51)  |        | 5.76)  | 3.11)  | -0.98)  |        |
|              |          |          |         |        | 1258.96) | 1258.22) |         |        |          |          |         |        |        |        |         |        |
|              | 0.29     | 0.26     | -0.36   |        | 5.21     | 4.86     | -0.27   |        | 5.02     | 1.72     | -3.63   |        | 0.08   | 0.02   | -3.97   |        |
| Sweden       | (0.13,   | (0.11,   | (-0.71, | 0.045  | (4.42,   | (4.13,   | (-0.38, | <0.001 | (4.25,   | (1.30,   | (-4.12, | <0.001 | (0.01, | (0.00, | (-4.66, | <0.001 |
|              | 0.56)    | 0.51)    | -0.01)  |        | 6.11)    | 5.70)    | -0.16)  |        | 5.90)    | 2.24)    | -3.14)  |        | 0.27)  | 0.18)  | -3.28)  |        |
|              | 0.56     | 0.46     | -0.69   |        | 9.64     | 9.01     | -0.27   |        | 8.05     | 1.67     | -5.45   |        | 0.13   | 0.02   | -6.28   |        |
| Switzerland  | (0.32,   | (0.25,   | (-0.94, | <0.001 | (8.49,   | (7.93,   | (-0.36, | <0.001 | (7.01,   | (1.23,   | (-5.92, | <0.001 | (0.03, | (0.00, | (-8.20, | <0.001 |
|              | 0.95)    | 0.81)    | -0.44)  |        | 10.92)   | 10.22)   | -0.18)  |        | 9.21)    | 2.24)    | -4.97)  |        | 0.39)  | 0.22)  | -4.33)  |        |
|              | 44.10    | 45.27    | 0.09    | <0.001 | 719.88   | 749.82   | 0.14    | <0.001 | 278.15   | 63.36    | -5.00   | <0.001 | 4.09   | 0.45   | -7.33   | <0.001 |

|                               |         |         |         |        |          |          |         |        |          |          |         |        |         |         |         |        |
|-------------------------------|---------|---------|---------|--------|----------|----------|---------|--------|----------|----------|---------|--------|---------|---------|---------|--------|
| Republic                      | (42.23, | (43.41, | (0.08,  |        | (711.94, | (741.93, | (0.13,  |        | (273.14, | (61.09,  | (-5.45, |        | (3.50,  | (0.28,  | (-7.92, |        |
|                               | 46.03)  | 47.19)  | 0.11)   |        | 727.91)  | 757.79)  | 0.15)   |        | 283.22)  | 65.71)   | -4.55)  |        | 4.77)   | 0.71)   | -6.74)  |        |
| Taiwan (Province<br>of China) | 2.48    | 2.32    | -0.23   |        | 24.82    | 35.54    | 1.24    |        | 36.88    | 6.37     | -5.84   |        | 0.60    | 0.08    | -6.82   |        |
|                               | (2.17,  | (2.01,  | (-0.32, | <0.001 | (23.82,  | (34.25,  | (1.10,  | <0.001 | (35.66,  | (5.84,   | (-6.50, | <0.001 | (0.46,  | (0.03,  | (-7.42, | <0.001 |
|                               | 2.82)   | 2.67)   | -0.13)  |        | 25.86)   | 36.86)   | 1.38)   |        | 38.14)   | 6.95)    | -5.18)  |        | 0.79)   | 0.18)   | -6.22)  |        |
| Tajikistan                    |         |         |         |        | 1088.61  | 1108.45  |         |        |          |          |         |        |         |         |         |        |
|                               | 62.23   | 64.73   | 0.14    |        | (1074.25 | (1098.19 | 0.06    |        | 402.49   | 154.44   | -3.20   |        | 5.98    | 1.74    | -4.05   |        |
|                               | (58.95, | (62.29, | (0.10,  | <0.001 | ,        | ,        | (0.04,  | <0.001 | (393.52, | (150.60, | (-3.56, | <0.001 | (4.92,  | (1.35,  | (-4.53, | <0.001 |
|                               | 65.67)  | 67.26)  | 0.17)   |        | 1103.13) | 1118.79) | 0.09)   |        | 411.62)  | 158.36)  | -2.83)  |        | 7.23)   | 2.21)   | -3.58)  |        |
| Thailand                      | 41.90   | 39.12   | -0.24   |        | 699.27   | 682.13   | -0.09   |        | 163.89   | 44.02    | -4.46   |        | 2.23    | 0.19    | -8.25   |        |
|                               | (41.12, | (38.31, | (-0.29, | <0.001 | (696.04, | (678.83, | (-0.11, | <0.001 | (162.31, | (43.18,  | (-4.89, | <0.001 | (2.04,  | (0.14,  | (-8.98, | <0.001 |
|                               | 42.70)  | 39.93)  | -0.20)  |        | 702.52)  | 685.44)  | -0.06)  |        | 165.48)  | 44.86)   | -4.04)  |        | 2.42)   | 0.25)   | -7.53)  |        |
| Timor-Leste                   | 48.07   | 47.90   | -0.01   |        | 735.02   | 762.23   | 0.13    |        | 191.28   | 142.22   | -0.89   |        | 2.64    | 1.74    | -1.27   |        |
|                               | (40.78, | (42.19, | (-0.03, | 0.034  | (705.21, | (737.97, | (0.12,  | <0.001 | (176.06, | (131.88, | (-1.66, | 0.024  | (1.13,  | (0.76,  | (-2.27, | 0.015  |
|                               | 56.39)  | 54.27)  | -0.00)  |        | 765.85)  | 787.17)  | 0.13)   |        | 207.54)  | 153.26)  | -0.12)  |        | 5.34)   | 3.53)   | -0.25)  |        |
| Togo                          |         |         |         |        | 1212.21  | 1277.49  |         |        |          |          |         |        |         |         |         |        |
|                               | 77.17   | 80.79   | 0.16    |        | (1193.32 | (1265.01 | 0.18    |        | 138.46   | 96.37    | -1.25   |        | 1.31    | 0.58    | -2.78   |        |
|                               | (72.62, | (77.73, | (0.14,  | <0.001 | ,        | ,        | (0.17,  | <0.001 | (132.18, | (92.97,  | (-1.37, | <0.001 | (0.76,  | (0.34,  | (-3.09, | <0.001 |
|                               | 81.97)  | 83.95)  | 0.17)   |        | 1231.34) | 1290.06) | 0.19)   |        | 145.00)  | 99.87)   | -1.13)  |        | 2.14)   | 0.92)   | -2.48)  |        |
| Tokelau                       | 11.41   | 7.80    | -1.31   |        | 101.24   | 94.65    | -0.25   |        | 488.09   | 272.05   | -2.00   |        | 8.15    | 4.46    | -2.06   |        |
|                               | (0.00,  | (0.00,  | (-1.41, | <0.001 | (0.21,   | (0.04,   | (-0.30, | <0.001 | (85.89,  | (14.43,  | (-2.07, | <0.001 | (0.00,  | (0.00,  | (-2.14, | <0.001 |
|                               | 841.94) | 902.29) | -1.20)  |        | 996.62)  | 1060.58) | -0.19)  |        | 1611.91) | 1356.55) | -1.92)  |        | 835.98) | 895.69) | -1.98)  |        |
| Tonga                         |         |         |         |        | 1188.96  | 1211.34  |         |        |          |          |         |        |         |         |         |        |
|                               | 50.82   | 50.70   | 0.01    |        | (1075.59 | (1102.63 | 0.10    |        | 199.33   | 149.48   | -0.97   |        | 2.41    | 1.52    | -1.52   |        |
|                               | (29.90, | (30.67, | (-0.06, | 0.767  | ,        | ,        | (0.03,  | 0.005  | (153.25, | (112.74, | (-1.12, | <0.001 | (0.02,  | (0.00,  | (-1.60, | <0.001 |
|                               | 82.91)  | 79.58)  | 0.08)   |        | 1312.45) | 1328.32) | 0.17)   |        | 256.30)  | 194.87)  | -0.82)  |        | 19.64)  | 14.14)  | -1.45)  |        |
| Trinidad and<br>Tobago        |         |         |         |        | 1272.43  | 1270.08  |         |        |          |          |         |        |         |         |         |        |
|                               | 68.87   | 65.73   | -0.17   |        | (1241.31 | (1238.99 | -0.01   |        | 185.69   | 100.52   | -2.09   |        | 2.09    | 0.67    | -3.87   |        |
|                               | (61.83, | (58.58, | (-0.19, | <0.001 | ,        | ,        | (-0.02, | 0.532  | (173.91, | (91.96,  | (-2.61, | <0.001 | (1.01,  | (0.16,  | (-4.76, | <0.001 |
|                               | 76.53)  | 73.54)  | -0.14)  |        | 1304.16) | 1301.79) | 0.01)   |        | 198.09)  | 109.72)  | -1.57)  |        | 3.84)   | 1.94)   | -2.97)  |        |
| Tunisia                       |         |         |         |        |          |          |         |        |          |          |         |        |         |         |         |        |
|                               | 1.16    | 0.87    | -0.98   |        | 17.40    | 14.09    | -0.73   |        | 44.80    | 14.21    | -3.90   |        | 0.73    | 0.23    | -3.96   |        |
|                               | (0.81,  | (0.62,  | (-1.07, | <0.001 | (15.99,  | (13.01,  | (-0.77, | <0.001 | (42.52,  | (13.13,  | (-4.05, | <0.001 | (0.47,  | (0.11,  | (-4.18, | <0.001 |
|                               | 1.62)   | 1.19)   | -0.88)  |        | 18.91)   | 15.24)   | -0.68)  |        | 47.18)   | 15.35)   | -3.75)  |        | 1.11)   | 0.42)   | -3.74)  |        |

|                                 |          |          |         |        |           |           |         |        |          |          |         |        |         |         |         |        |
|---------------------------------|----------|----------|---------|--------|-----------|-----------|---------|--------|----------|----------|---------|--------|---------|---------|---------|--------|
|                                 | 1.00     | 0.79     | -0.80   |        | 14.63     | 13.70     | -0.22   |        | 17.50    | 4.94     | -4.25   |        | 0.28    | 0.07    | -4.56   |        |
| Turkey                          | (0.88,   | (0.69,   | (-0.93, | <0.001 | (14.14,   | (13.31,   | (-0.29, | <0.001 | (16.96,  | (4.71,   | (-4.72, | <0.001 | (0.22,  | (0.05,  | (-5.51, | <0.001 |
|                                 | 1.14)    | 0.88)    | -0.66)  |        | 15.13)    | 14.09)    | -0.14)  |        | 18.05)   | 5.18)    | -3.78)  |        | 0.36)   | 0.11)   | -3.61)  |        |
|                                 | 61.38    | 59.49    | -0.11   |        | 1060.06   | 1054.88   | -0.02   |        | 318.53   | 166.24   | -2.22   |        | 4.47    | 1.92    | -2.86   |        |
| Turkmenistan                    | (57.56,  | (56.15,  | (-0.12, | <0.001 | (1043.62, | (1040.81, | (-0.04, | 0.169  | (309.46, | (160.69, | (-3.16, | <0.001 | (3.44,  | (1.37,  | (-3.97, | <0.001 |
|                                 | 65.40)   | 62.98)   | -0.10)  |        | 1076.71)  | 1069.10)  | 0.01)   |        | 327.81)  | 171.95)  | -1.27)  |        | 5.73)   | 2.63)   | -1.73)  |        |
|                                 | 16.73    | 10.41    | -1.63   |        | 109.87    | 94.75     | -0.52   |        | 790.14   | 431.43   | -2.06   |        | 13.26   | 7.14    | -2.11   |        |
| Tuvalu                          | (0.05,   | (0.01,   | (-1.69, | <0.001 | (29.42,   | (28.01,   | (-0.57, | <0.001 | (525.97, | (263.84, | (-2.17, | <0.001 | (0.01,  | (0.00,  | (-2.22, | <0.001 |
|                                 | 140.49)  | 109.08)  | -1.56)  |        | 286.71)   | 238.44)   | -0.47)  |        | 1142.36) | 669.94)  | -1.95)  |        | 134.07) | 103.00) | -2.00)  |        |
|                                 | 122.01   | 118.76   | -0.09   |        | 1974.98   | 2188.29   | 0.38    |        | 156.70   | 140.13   | -0.40   |        | 1.02    | 0.57    | -2.04   |        |
| Uganda                          | (119.37, | (117.12, | (-0.11, | <0.001 | (1963.76, | (2180.89, | (0.33,  | <0.001 | (153.58, | (138.28, | (-0.64, | 0.001  | (0.78,  | (0.46,  | (-2.41, | <0.001 |
|                                 | 124.71)  | 120.42)  | -0.08)  |        | 1986.27)  | 2195.71)  | 0.42)   |        | 159.88)  | 142.01)  | -0.16)  |        | 1.32)   | 0.71)   | -1.66)  |        |
|                                 | 2.93     | 2.57     | -0.41   |        | 24.41     | 23.77     | -0.01   |        | 23.08    | 27.37    | 0.54    |        | 0.38    | 0.45    | 0.65    |        |
| Ukraine                         | (2.70,   | (2.33,   | (-0.68, | 0.003  | (23.72,   | (22.99,   | (-0.27, | 0.940  | (22.42,  | (26.54,  | (-1.84, | 0.658  | (0.30,  | (0.35,  | (-1.30, | 0.516  |
|                                 | 3.17)    | 2.83)    | -0.14)  |        | 25.11)    | 24.57)    | 0.25)   |        | 23.77)   | 28.23)   | 2.98)   |        | 0.47)   | 0.57)   | 2.63)   |        |
|                                 | 37.31    | 38.64    | 0.12    |        | 712.16    | 718.88    | 0.03    |        | 77.79    | 54.73    | -1.20   |        | 0.74    | 0.35    | -2.55   |        |
| United Arab<br>Emirates         | (33.21,  | (36.05,  | (0.11,  | <0.001 | (694.83,  | (708.50,  | (0.01,  | 0.006  | (72.25,  | (52.01,  | (-1.39, | <0.001 | (0.31,  | (0.18,  | (-2.91, | <0.001 |
|                                 | 41.85)   | 41.39)   | 0.13)   |        | 729.89)   | 729.39)   | 0.06)   |        | 83.72)   | 57.58)   | -1.02)  |        | 1.68)   | 0.68)   | -2.19)  |        |
|                                 | 0.51     | 0.38     | -0.96   |        | 8.01      | 7.02      | -0.44   |        | 8.37     | 3.57     | -2.92   |        | 0.14    | 0.06    | -2.88   |        |
| United Kingdom                  | (0.42,   | (0.30,   | (-1.12, | <0.001 | (7.63,    | (6.67,    | (-0.50, | <0.001 | (7.99,   | (3.33,   | (-3.26, | <0.001 | (0.09,  | (0.03,  | (-3.35, | <0.001 |
|                                 | 0.61)    | 0.47)    | -0.79)  |        | 8.41)     | 7.38)     | -0.38)  |        | 8.77)    | 3.82)    | -2.57)  |        | 0.20)   | 0.10)   | -2.40)  |        |
|                                 | 108.19   | 111.36   | 0.11    |        | 1810.44   | 1913.06   | 0.19    |        | 154.93   | 122.75   | -0.80   |        | 1.10    | 0.50    | -2.68   |        |
| United Republic of<br>Tanzania  | (106.16, | (110.00, | (0.07,  | <0.001 | (1801.74, | (1907.20, | (0.16,  | <0.001 | (152.43, | (121.28, | (-0.87, | <0.001 | (0.90,  | (0.42,  | (-2.87, | <0.001 |
|                                 | 110.25)  | 112.73)  | 0.14)   |        | 1819.17)  | 1918.93)  | 0.21)   |        | 157.47)  | 124.24)  | -0.73)  |        | 1.34)   | 0.61)   | -2.49)  |        |
|                                 | 1.94     | 1.30     | -1.37   |        | 29.36     | 21.17     | -1.11   |        | 17.14    | 6.56     | -3.23   |        | 0.27    | 0.09    | -3.61   |        |
| United States of<br>America     | (1.85,   | (1.23,   | (-1.45, | <0.001 | (29.03,   | (20.91,   | (-1.15, | <0.001 | (16.89,  | (6.41,   | (-3.67, | <0.001 | (0.24,  | (0.07,  | (-4.87, | <0.001 |
|                                 | 2.02)    | 1.36)    | -1.29)  |        | 29.69)    | 21.44)    | -1.06)  |        | 17.39)   | 6.71)    | -2.79)  |        | 0.30)   | 0.11)   | -2.34)  |        |
|                                 | 1.53     | 1.17     | -0.95   |        | 25.34     | 20.91     | -0.67   |        | 59.20    | 20.37    | -3.60   |        | 0.96    | 0.33    | -3.77   |        |
| United States<br>Virgin Islands | (0.00,   | (0.00,   | (-1.07, | <0.001 | (12.13,   | (7.98,    | (-0.78, | <0.001 | (37.71,  | (7.70,   | (-4.55, | <0.001 | (0.00,  | (0.00,  | (-4.36, | <0.001 |
|                                 | 13.08)   | 15.40)   | -0.83)  |        | 47.05)    | 45.06)    | -0.55)  |        | 88.88)   | 44.23)   | -2.65)  |        | 12.07)  | 13.83)  | -3.17)  |        |

|              |          |          |         |        |          |          |         |        |          |          |         |        |        |        |         |        |
|--------------|----------|----------|---------|--------|----------|----------|---------|--------|----------|----------|---------|--------|--------|--------|---------|--------|
|              | 1.65     | 1.66     | 0.05    |        | 22.14    | 23.89    | 0.28    |        | 29.10    | 14.57    | -2.35   |        | 0.48   | 0.23   | -2.48   |        |
| Uruguay      | (0.98,   | (1.02,   | (-0.07, | 0.428  | (19.48,  | (21.23,  | (0.23,  | <0.001 | (26.03,  | (12.52,  | (-2.80, | <0.001 | (0.17, | (0.04, | (-2.85, | <0.001 |
|              | 2.59)    | 2.56)    | 0.16)   |        | 25.06)   | 26.81)   | 0.34)   |        | 32.42)   | 16.88)   | -1.89)  |        | 1.09)  | 0.71)  | -2.11)  |        |
|              |          |          |         |        | 1040.83  | 1109.19  |         |        | 453.15   | 206.30   | -2.61   |        | 6.82   | 2.60   | -3.19   |        |
| Uzbekistan   | (60.06,  | (62.14,  | (0.09,  | <0.001 | (1033.93 | (1103.73 | (0.20,  | <0.001 | (448.54, | (203.95, | (-3.45, | <0.001 | (6.26, | (2.34, | (-4.02, | <0.001 |
|              | 63.36)   | 64.78)   | 0.11)   |        | ,        | ,        | 0.24)   |        | 457.80)  | 208.67)  | -1.76)  |        | 7.42)  | 2.87)  | -2.36)  |        |
|              |          |          |         |        | 1047.76) | 1114.67) |         |        |          |          |         |        |        |        |         |        |
|              | 47.84    | 48.26    | 0.03    |        | 868.67   | 877.58   | 0.04    |        | 706.68   | 702.61   | -0.05   |        | 11.23  | 11.06  | -0.08   |        |
| Vanuatu      | (31.66,  | (36.49,  | (0.02,  | <0.001 | (794.09, | (824.66, | (0.02,  | <0.001 | (638.15, | (654.83, | (-0.27, | 0.696  | (4.15, | (5.80, | (-0.31, | 0.498  |
|              | 69.94)   | 62.83)   | 0.05)   |        | 948.79)  | 933.18)  | 0.06)   |        | 780.91)  | 753.11)  | 0.18)   |        | 24.87) | 19.34) | 0.15)   |        |
| Venezuela    | 1.87     | 1.28     | -1.30   |        | 27.16    | 20.45    | -0.97   |        | 64.57    | 18.11    | -4.28   |        | 1.06   | 0.29   | -4.39   |        |
| (Bolivarian  | (1.57,   | (1.07,   | (-1.39, | <0.001 | (26.01,  | (19.60,  | (-1.07, | <0.001 | (62.79,  | (17.31,  | (-5.39, | <0.001 | (0.85, | (0.19, | (-5.50, | <0.001 |
| Republic of) | 2.20)    | 1.51)    | -1.20)  |        | 28.35)   | 21.32)   | -0.87)  |        | 66.39)   | 18.93)   | -3.16)  |        | 1.33)  | 0.41)  | -3.27)  |        |
|              | 3.37     | 2.46     | -1.08   |        | 32.63    | 31.00    | -0.16   |        | 80.99    | 26.60    | -3.76   |        | 1.36   | 0.43   | -3.88   |        |
| Viet Nam     | (3.14,   | (2.31,   | (-1.20, | <0.001 | (31.94,  | (30.45,  | (-0.26, | 0.001  | (79.90,  | (26.10,  | (-3.87, | <0.001 | (1.22, | (0.37, | (-4.09, | <0.001 |
|              | 3.60)    | 2.62)    | -0.96)  |        | 33.33)   | 31.55)   | -0.06)  |        | 82.09)   | 27.11)   | -3.65)  |        | 1.52)  | 0.50)  | -3.67)  |        |
|              | 63.72    | 66.03    | 0.12    |        | 880.91   | 946.10   | 0.24    |        | 162.06   | 101.46   | -1.59   |        | 2.06   | 0.96   | -2.57   |        |
| Yemen        | (61.44,  | (64.65,  | (0.03,  | 0.008  | (872.13, | (940.77, | (0.18,  | <0.001 | (158.25, | (99.70,  | (-1.79, | <0.001 | (1.64, | (0.80, | (-2.87, | <0.001 |
|              | 66.07)   | 67.44)   | 0.20)   |        | 889.76)  | 951.46)  | 0.30)   |        | 165.94)  | 103.23)  | -1.38)  |        | 2.55)  | 1.15)  | -2.27)  |        |
|              |          |          |         |        | 1881.94  | 1878.97  |         |        | 188.91   | 134.81   | -1.16   |        | 1.59   | 0.73   | -2.65   |        |
| Zambia       | (107.23, | (111.79, | (0.08,  | <0.001 | (1865.89 | (1869.08 | (-0.07, | 0.731  | (183.93, | (132.19, | (-1.28, | <0.001 | (1.16, | (0.55, | (-2.90, | <0.001 |
|              | 114.68)  | 116.52)  | 0.11)   |        | ,        | ,        | 0.05)   |        | 194.01)  | 137.48)  | -1.05)  |        | 2.15)  | 0.95)  | -2.40)  |        |
|              |          |          |         |        | 1535.52  | 1587.62  |         |        | 280.87   | 311.68   | 0.35    |        | 3.29   | 3.75   | 0.45    |        |
| Zimbabwe     | (92.83,  | (97.55,  | (0.13,  | <0.001 | (1522.92 | (1577.61 | (0.11,  | <0.001 | (275.64, | (307.32, | (-0.24, | 0.244  | (2.75, | (3.28, | (-0.33, | 0.259  |
|              | 98.91)   | 102.48)  | 0.18)   |        | ,        | ,        | 0.13)   |        | 286.18)  | 316.08)  | 0.95)   |        | 3.93)  | 4.26)  | 1.23)   |        |
|              |          |          |         |        | 1548.21) | 1597.68) |         |        |          |          |         |        |        |        |         |        |
| <b>Women</b> |          |          |         |        |          |          |         |        |          |          |         |        |        |        |         |        |
|              | 59.24    | 60.46    | 0.07    |        | 768.75   | 787.29   | 0.08    |        | 454.88   | 211.97   | -2.59   |        | 7.05   | 2.99   | -2.91   |        |
| Afghanistan  | (55.82,  | (58.66,  | (0.05,  | <0.001 | (755.67, | (780.49, | (0.07,  | <0.001 | (444.61, | (208.34, | (-2.76, | <0.001 | (5.81, | (2.56, | (-3.10, | <0.001 |
|              | 62.86)   | 62.30)   | 0.09)   |        | 782.03)  | 794.13)  | 0.10)   |        | 465.35)  | 215.67)  | -2.42)  |        | 8.51)  | 3.47)  | -2.71)  |        |
|              | 55.15    | 52.43    | -0.17   |        | 1142.65  | 1141.96  | 0.00    |        | 127.14   | 66.68    | -2.26   |        | 1.24   | 0.21   | -6.13   |        |
| Albania      | (49.82,  | (46.03,  | (-0.18, | <0.001 | (1117.50 | (1111.49 | (-0.00, | 0.792  | (118.79, | (59.47,  | (-2.52, | <0.001 | (0.54, | (0.00, | (-6.78, | <0.001 |

|                     |         |         |         |        |          |          |          |          |          |          |         |        |         |        |         |        |
|---------------------|---------|---------|---------|--------|----------|----------|----------|----------|----------|----------|---------|--------|---------|--------|---------|--------|
|                     | 60.94)  | 59.50)  | -0.16)  |        | ,        | ,        | 0.01)    |          | 135.95)  | 74.54)   | -1.99)  |        | 2.47)   | 1.25)  | -5.49)  |        |
|                     |         |         |         |        | 1168.26) | 1173.09) |          |          |          |          |         |        |         |        |         |        |
|                     | 34.85   | 35.21   | 0.03    |        | 521.16   | 591.70   | 0.44     |          | 140.61   | 49.91    | -3.52   |        | 1.94    | 0.37   | -5.58   |        |
| Algeria             | (33.23, | (33.92, | (-0.01, | 0.145  | (514.55, | (586.54, | (0.35,   | <0.001   | (137.17, | (48.42,  | (-3.70, | <0.001 | (1.55,  | (0.25, | (-5.71, | <0.001 |
|                     | 36.54)  | 36.53)  | 0.07)   |        | 527.84)  | 596.90)  | 0.52)    |          | 144.12)  | 51.43)   | -3.34)  |        | 2.41)   | 0.52)  | -5.44)  |        |
|                     | 37.88   | 39.77   | 0.17    |        | 942.33   | 968.53   | 0.10     |          | 281.82   | 264.25   | -0.16   |        | 3.97    | 3.67   | -0.21   |        |
| American Samoa      | (9.82,  | (11.07, | (0.16,  | <0.001 | (760.49, | (786.21, | (0.09,   | <0.001   | (185.53, | (171.66, | (-0.35, | 0.106  | (0.00,  | (0.00, | (-0.44, | 0.072  |
|                     | 105.88) | 106.54) | 0.18)   |        | 1158.03) | 1183.50) | 0.11)    |          | 413.93)  | 391.79)  | 0.03)   |        | 54.81)  | 52.37) | 0.02)   |        |
|                     | 0.42    | 0.36    | -0.55   |        | 7.77     | 7.26     | -0.24    |          | 9.67     | 4.75     | -2.42   |        | 0.16    | 0.07   | -2.59   |        |
| Andorra             | (0.00,  | (0.00,  | (-0.68, | <0.001 | (0.13,   | (0.12,   | (-0.25,  | <0.001   | (0.37,   | (0.02,   | (-2.60, | <0.001 | (0.00,  | (0.00, | (-2.91, | <0.001 |
|                     | 43.48)  | 40.17)  | -0.41)  |        | 55.51)   | 51.57)   | -0.22)   |          | 58.18)   | 47.25)   | -2.24)  |        | 43.03)  | 39.71) | -2.27)  |        |
|                     |         |         |         |        | 1812.43  | 1873.19  |          |          |          |          |         |        |         |        |         |        |
|                     | 100.60  | 100.07  | -0.02   |        | (1793.34 | (1861.99 | 0.12     |          | 248.46   | 135.41   | -2.02   |        | 2.76    | 0.80   | -4.19   |        |
| Angola              | (96.27, | (97.58, | (-0.03, | 0.015  | (0.10,   | <0.001   | (241.30, | (132.38, | (-2.47,  | <0.001   | (2.04,  | (0.58, | (-4.85, | <0.001 |         |        |
|                     | 105.09) | 102.62) | -0.00)  |        | ,        | ,        | 0.14)    |          | 255.78)  | 138.50)  | -1.57)  |        | 3.66)   | 1.08)  | -3.53)  |        |
|                     |         |         |         |        | 1831.69) | 1884.45) |          |          |          |          |         |        |         |        |         |        |
|                     |         |         |         |        | 1384.55  | 1380.80  |          |          |          |          |         |        |         |        |         |        |
| Antigua and Barbuda | 64.14   | 62.24   | -0.10   |        | (1191.23 | (1212.33 | -0.01    |          | 171.47   | 97.39    | -1.97   |        | 1.79    | 0.53   | -4.18   |        |
|                     | (28.66, | (30.48, | (-0.11, | <0.001 | (-0.01,  | 0.261    | (108.12, | (56.83,  | (-2.18,  | <0.001   | (0.00,  | (0.00, | (-4.74, | <0.001 |         |        |
|                     | 125.38) | 113.85) | -0.09)  |        | ,        | ,        | 0.00)    |          | 259.64)  | 157.02)  | -1.76)  |        | 34.67)  | 25.09) | -3.62)  |        |
|                     |         |         |         |        | 1601.37) | 1567.07) |          |          |          |          |         |        |         |        |         |        |
|                     |         |         |         |        | 1033.13  | 1061.78  |          |          |          |          |         |        |         |        |         |        |
| Argentina           | 49.67   | 49.83   | 0.01    |        | (1025.10 | (1054.98 | 0.09     |          | 94.88    | 61.63    | -1.50   |        | 0.78    | 0.19   | -4.85   |        |
|                     | (47.94, | (48.35, | (0.00,  | 0.057  | (0.08,   | <0.001   | (92.46,  | (60.00,  | (-1.62,  | <0.001   | (0.58,  | (0.11, | (-5.56, | <0.001 |         |        |
|                     | 51.45)  | 51.35)  | 0.02)   |        | ,        | ,        | 0.10)    |          | 97.36)   | 63.29)   | -1.37)  |        | 1.04)   | 0.31)  | -4.13)  |        |
|                     |         |         |         |        | 1041.20) | 1068.61) |          |          |          |          |         |        |         |        |         |        |
|                     |         |         |         |        | 1303.91  | 1245.99  |          |          |          |          |         |        |         |        |         |        |
| Armenia             | 58.70   | 55.10   | -0.22   |        | (1277.72 | (1216.19 | -0.16    |          | 201.37   | 95.72    | -2.53   |        | 2.40    | 0.62   | -4.56   |        |
|                     | (53.17, | (48.61, | (-0.25, | <0.001 | (-0.17,  | <0.001   | (191.16, | (87.71,  | (-3.23,  | <0.001   | (1.40,  | (0.16, | (-5.94, | <0.001 |         |        |
|                     | 64.68)  | 62.31)  | -0.20)  |        | ,        | ,        | -0.14)   |          | 212.00)  | 104.39)  | -1.82)  |        | 3.85)   | 1.92)  | -3.16)  |        |
|                     |         |         |         |        | 1330.52) | 1276.44) |          |          |          |          |         |        |         |        |         |        |
|                     |         |         |         |        | 29.40    | 28.75    | -0.05    |          | 19.63    | 9.96     | -2.31   |        | 0.30    | 0.15   | -2.41   |        |
| Australia           | (1.07,  | (0.97,  | (-0.53, | <0.001 | (27.60,  | (27.15,  | (-0.15,  | 0.302    | (18.17,  | (9.05,   | (-3.01, | <0.001 | (0.15,  | (0.06, | (-3.31, | <0.001 |
|                     | 1.90)   | 1.68)   | -0.21)  |        | 31.28)   | 30.44)   | 0.05)    |          | 21.17)   | 10.95)   | -1.61)  |        | 0.56)   | 0.33)  | -1.50)  |        |
|                     | 1.06    | 0.43    | -2.96   |        | 15.36    | 7.50     | -2.45    |          | 8.35     | 3.47     | -2.98   |        | 0.13    | 0.05   | -3.26   |        |
| Austria             | (0.60,  | (0.16,  | (-3.32, | <0.001 | (13.41,  | (6.13,   | (-2.74,  | <0.001   | (6.94,   | (2.56,   | (-3.90, | <0.001 | (0.01,  | (0.00, | (-5.37, | 0.003  |
|                     | 1.77)   | 0.99)   | -2.60)  |        | 17.53)   | 9.13)    | -2.17)   |          | 9.98)    | 4.63)    | -2.06)  |        | 0.52)   | 0.45)  | -1.10)  |        |



|            |         |         |         |        |          |          |         |        |          |          |         |        |        |        |         |        |
|------------|---------|---------|---------|--------|----------|----------|---------|--------|----------|----------|---------|--------|--------|--------|---------|--------|
|            | 58.14   | 55.84   | -0.15   |        | 1164.83  | 1145.26  | -0.06   |        | 213.84   | 105.78   | -2.41   |        | 2.67   | 0.85   | -3.96   |        |
| Azerbaijan | (54.48, | (52.51, | (-0.19, | <0.001 | (1148.11 | (1130.64 | (-0.08, | <0.001 | (206.68, | (101.37, | (-2.91, | <0.001 | (1.92, | (0.50, | (-4.76, | <0.001 |
|            | 62.00)  | 59.36)  | -0.11)  |        | ,        | ,        | -0.05)  |        | 221.21)  | 110.35)  | -1.91)  |        | 3.64)  | 1.38)  | -3.15)  |        |
|            |         |         |         |        | 1181.76) | 1160.05) |         |        |          |          |         |        |        |        |         |        |
|            |         |         |         |        | 1346.97  | 1364.42  |         |        |          |          |         |        |        |        |         |        |
| Bahamas    | 67.34   | 67.82   | 0.03    |        | (1255.15 | (1282.85 | 0.05    |        | 153.20   | 108.06   | -1.34   |        | 1.53   | 0.74   | -2.69   |        |
|            | (48.33, | (50.46, | (-0.01, | 0.095  | ,        | ,        | (0.03,  | <0.001 | (123.06, | (86.07,  | (-1.53, | <0.001 | (0.02, | (0.00, | (-3.18, | <0.001 |
|            | 91.88)  | 89.34)  | 0.06)   |        | 1444.12) | 1449.93) | 0.06)   |        | 188.89)  | 134.09)  | -1.16)  |        | 10.24) | 6.62)  | -2.19)  |        |
|            |         |         |         |        |          |          |         |        |          |          |         |        |        |        |         |        |
| Bahrain    | 1.24    | 1.07    | -0.49   |        | 20.79    | 18.42    | -0.43   |        | 35.06    | 13.80    | -3.23   |        | 0.53   | 0.20   | -3.41   |        |
|            | (0.05,  | (0.19,  | (-0.59, | <0.001 | (12.72,  | (13.36,  | (-0.47, | <0.001 | (24.23,  | (9.32,   | (-4.52, | <0.001 | (0.00, | (0.00, | (-4.69, | <0.001 |
|            | 6.78)   | 3.67)   | -0.40)  |        | 32.42)   | 24.93)   | -0.39)  |        | 49.38)   | 19.82)   | -1.92)  |        | 5.59)  | 2.38)  | -2.11)  |        |
|            |         |         |         |        |          |          |         |        |          |          |         |        |        |        |         |        |
| Bangladesh | 87.82   | 77.18   | -0.46   |        | 1075.94  | 1042.31  | -0.13   |        | 216.29   | 127.82   | -1.77   |        | 2.68   | 1.28   | -2.46   |        |
|            | (86.59, | (76.28, | (-0.52, | <0.001 | (1071.29 | (1038.93 | (-0.18, | <0.001 | (214.26, | (126.64, | (-2.48, | <0.001 | (2.46, | (1.16, | (-3.40, | <0.001 |
|            | 89.08)  | 78.10)  | -0.39)  |        | ,        | ,        | -0.07)  |        | 218.34)  | 129.01)  | -1.05)  |        | 2.92)  | 1.40)  | -1.51)  |        |
|            |         |         |         |        | 1080.59) | 1045.70) |         |        |          |          |         |        |        |        |         |        |
|            |         |         |         |        | 1351.29  | 1374.47  |         |        |          |          |         |        |        |        |         |        |
| Barbados   | 66.12   | 65.84   | -0.01   |        | (1256.19 | (1273.52 | 0.06    |        | 152.20   | 105.05   | -1.24   |        | 1.46   | 0.67   | -2.64   |        |
|            | (46.30, | (44.91, | (-0.03, | 0.029  | ,        | ,        | (0.05,  | <0.001 | (121.42, | (78.64,  | (-1.61, | <0.001 | (0.02, | (0.00, | (-3.49, | <0.001 |
|            | 91.72)  | 93.38)  | -0.00)  |        | 1451.86) | 1481.56) | 0.06)   |        | 188.59)  | 137.82)  | -0.87)  |        | 9.94)  | 9.50)  | -1.77)  |        |
|            |         |         |         |        |          |          |         |        |          |          |         |        |        |        |         |        |
| Belarus    | 4.92    | 2.68    | -2.06   |        | 34.35    | 24.71    | -1.12   |        | 78.78    | 14.48    | -6.06   |        | 1.35   | 0.23   | -6.29   |        |
|            | (4.02,  | (1.98,  | (-2.20, | <0.001 | (31.86,  | (22.32,  | (-1.31, | <0.001 | (74.99,  | (12.69,  | (-7.49, | <0.001 | (0.89, | (0.06, | (-7.74, | <0.001 |
|            | 5.98)   | 3.63)   | -1.91)  |        | 36.99)   | 27.34)   | -0.94)  |        | 82.73)   | 16.49)   | -4.61)  |        | 1.97)  | 0.70)  | -4.81)  |        |
|            |         |         |         |        |          |          |         |        |          |          |         |        |        |        |         |        |
| Belgium    | 0.46    | 0.45    | -0.02   |        | 9.22     | 9.48     | 0.05    |        | 3.95     | 2.83     | -1.21   |        | 0.06   | 0.04   | -1.34   |        |
|            | (0.21,  | (0.20,  | (-0.37, | 0.890  | (7.88,   | (8.09,   | (-0.09, | 0.494  | (3.10,   | (2.11,   | (-1.58, | <0.001 | (0.00, | (0.00, | (-2.11, | 0.001  |
|            | 0.91)   | 0.92)   | 0.32)   |        | 10.74)   | 11.05)   | 0.18)   |        | 4.97)    | 3.75)    | -0.85)  |        | 0.35)  | 0.33)  | -0.55)  |        |
|            |         |         |         |        |          |          |         |        |          |          |         |        |        |        |         |        |
| Belize     | 73.24   | 71.50   | -0.08   |        | 1355.95  | 1375.30  | 0.05    |        | 137.68   | 112.62   | -0.70   |        | 1.23   | 0.79   | -1.52   |        |
|            | (48.47, | (55.39, | (-0.09, | <0.001 | (1234.81 | (1299.59 | (0.04,  | <0.001 | (100.74, | (91.64,  | (-1.04, | <0.001 | (0.00, | (0.00, | (-2.23, | <0.001 |
|            | 108.39) | 91.06)  | -0.06)  |        | ,        | ,        | 0.06)   |        | 185.27)  | 137.11)  | -0.37)  |        | 17.28) | 6.08)  | -0.81)  |        |
|            |         |         |         |        | 1487.06) | 1454.42) |         |        |          |          |         |        |        |        |         |        |
|            |         |         |         |        | 1216.50  | 1272.52  |         |        |          |          |         |        |        |        |         |        |
| Benin      | 75.06   | 76.96   | 0.09    |        | (1193.90 | (1258.37 | 0.16    |        | 147.07   | 98.04    | -1.37   |        | 1.44   | 0.61   | -2.93   |        |
|            | (69.65, | (73.62, | (0.08,  | <0.001 | ,        | ,        | (0.14,  | <0.001 | (139.33, | (94.16,  | (-1.44, | <0.001 | (0.77, | (0.34, | (-3.10, | <0.001 |
|            | 80.82)  | 80.43)  | 0.10)   |        | 1239.46) | 1286.80) | 0.17)   |        | 155.17)  | 102.05)  | -1.31)  |        | 2.52)  | 1.03)  | -2.77)  |        |

|                   |          |          |         |        |          |          |         |        |          |          |         |        |        |        |         |        |
|-------------------|----------|----------|---------|--------|----------|----------|---------|--------|----------|----------|---------|--------|--------|--------|---------|--------|
|                   | 1.68     | 0.94     | -1.97   |        | 28.88    | 19.85    | -1.31   |        | 46.07    | 10.24    | -5.59   |        | 0.74   | 0.15   | -6.06   |        |
| Bermuda           | (0.00,   | (0.00,   | (-2.10, | <0.001 | (7.50,   | (2.09,   | (-1.36, | <0.001 | (16.85,  | (0.21,   | (-6.10, | <0.001 | (0.00, | (0.00, | (-6.77, | <0.001 |
|                   | 43.73)   | 54.20)   | -1.85)  |        | 83.73)   | 84.30)   | -1.25)  |        | 107.43)  | 69.48)   | -5.07)  |        | 42.25) | 52.87) | -5.35)  |        |
|                   | 78.12    | 73.35    | -0.21   |        | 1027.93  | 1015.86  | -0.04   |        | 524.16   | 191.67   | -3.42   |        | 8.10   | 2.47   | -4.03   |        |
| Bhutan            | (63.22,  | (60.90,  | (-0.23, | <0.001 | (968.53, | (967.89, | (-0.05, | <0.001 | (481.23, | (171.09, | (-3.69, | <0.001 | (3.55, | (0.68, | (-4.33, | <0.001 |
|                   | 95.94)   | 87.64)   | -0.18)  |        | 1090.33) | 1065.63) | -0.03)  |        | 570.16)  | 214.09)  | -3.15)  |        | 16.19) | 6.35)  | -3.72)  |        |
|                   |          |          |         |        | 1296.52  | 1336.01  |         |        | 215.92   | 98.46    | -2.69   |        | 2.62   | 0.60   | -4.95   |        |
| Bolivia           | 78.33    | 78.03    | -0.01   |        | (1276.43 | (1321.42 | (0.09,  | <0.001 | (207.66, | (94.52,  | (-2.79, | <0.001 | (1.78, | (0.33, | (-5.06, | <0.001 |
| (Plurinational    | (73.59,  | (74.55,  | (-0.03, | 0.259  | ,        | ,        | (0.09,  | <0.001 | (207.66, | (94.52,  | (-2.79, | <0.001 | (1.78, | (0.33, | (-5.06, | <0.001 |
| State of)         | 83.33)   | 81.62)   | 0.01)   |        | 1316.87) | 1350.72) | 0.12)   |        | 224.43)  | 102.53)  | -2.58)  |        | 3.75)  | 1.01)  | -4.85)  |        |
|                   | 0.85     | 0.99     | 0.60    |        | 7.05     | 8.32     | 0.58    |        | 13.97    | 3.53     | -4.67   |        | 0.23   | 0.05   | -4.91   |        |
| Bosnia and        | (0.37,   | (0.35,   | (0.33,  | <0.001 | (5.45,   | (6.06,   | (0.43,  | <0.001 | (11.69,  | (2.12,   | (-5.31, | <0.001 | (0.03, | (0.00, | (-5.84, | <0.001 |
| Herzegovina       | 1.70)    | 2.34)    | 0.87)   |        | 8.98)    | 11.22)   | 0.73)   |        | 16.58)   | 5.59)    | -4.02)  |        | 0.82)  | 0.98)  | -3.97)  |        |
|                   | 100.46   | 97.68    | -0.10   |        | 1686.45  | 1683.39  | -0.01   |        | 216.65   | 131.18   | -1.71   |        | 2.30   | 0.86   | -3.31   |        |
| Botswana          | (89.14,  | (89.36,  | (-0.11, | <0.001 | (1637.25 | (1648.64 | (-0.05, | 0.557  | (198.94, | (121.62, | (-1.89, | <0.001 | (0.81, | (0.26, | (-3.70, | <0.001 |
|                   | 113.00)  | 106.59)  | -0.09)  |        | ,        | ,        | 0.03)   |        | 235.65)  | 141.31)  | -1.53)  |        | 5.35)  | 2.11)  | -2.92)  |        |
|                   | 77.15    | 77.92    | 0.04    |        | 1508.33  | 1554.50  | 0.11    |        | 169.00   | 100.78   | -1.76   |        | 1.64   | 0.47   | -4.22   |        |
| Brazil            | (76.20,  | (77.07,  | (-0.02, | 0.206  | (1504.04 | (1550.78 | (0.10,  | <0.001 | (167.56, | (99.84,  | (-1.89, | <0.001 | (1.50, | (0.41, | (-4.57, | <0.001 |
|                   | 78.10)   | 78.78)   | 0.10)   |        | ,        | ,        | 0.11)   |        | 170.45)  | 101.73)  | -1.63)  |        | 1.79)  | 0.53)  | -3.89)  |        |
|                   | 2.01     | 0.99     | -2.47   |        | 24.85    | 15.41    | -1.72   |        | 58.09    | 23.80    | -3.07   |        | 0.98   | 0.39   | -3.11   |        |
| Brunei Darussalam | (0.07,   | (0.02,   | (-2.63, | <0.001 | (13.56,  | (8.55,   | (-1.95, | <0.001 | (39.91,  | (15.04,  | (-3.24, | <0.001 | (0.00, | (0.00, | (-3.28, | <0.001 |
|                   | 10.97)   | 6.42)    | -2.31)  |        | 42.09)   | 25.96)   | -1.48)  |        | 82.01)   | 36.15)   | -2.89)  |        | 9.18)  | 5.45)  | -2.94)  |        |
|                   | 2.75     | 1.23     | -2.75   |        | 16.85    | 9.96     | -1.81   |        | 115.65   | 29.01    | -4.66   |        | 2.01   | 0.50   | -4.70   |        |
| Bulgaria          | (1.99,   | (0.66,   | (-2.88, | <0.001 | (14.86,  | (8.11,   | (-1.94, | <0.001 | (110.35, | (25.83,  | (-5.12, | <0.001 | (1.37, | (0.17, | (-5.18, | <0.001 |
|                   | 3.71)    | 2.17)    | -2.61)  |        | 19.04)   | 12.17)   | -1.68)  |        | 121.14)  | 32.53)   | -4.20)  |        | 2.86)  | 1.24)  | -4.23)  |        |
|                   | 79.58    | 79.47    | -0.01   |        | 1213.59  | 1234.24  | 0.06    |        | 122.38   | 100.93   | -0.65   |        | 1.06   | 0.69   | -1.44   |        |
| Burkina Faso      | (75.50,  | (76.92,  | (-0.04, | 0.437  | (1197.03 | (1223.85 | (0.05,  | <0.001 | (117.17, | (97.99,  | (-0.74, | <0.001 | (0.63, | (0.46, | (-1.69, | <0.001 |
|                   | 83.84)   | 82.09)   | 0.02)   |        | ,        | ,        | 0.07)   |        | 127.77)  | 103.95)  | -0.55)  |        | 1.71)  | 0.99)  | -1.19)  |        |
|                   | 119.92   | 127.34   | 0.21    |        | 1936.93  | 2039.99  | 0.18    |        | 279.40   | 163.62   | -1.85   |        | 3.05   | 1.09   | -3.53   |        |
| Burundi           | (113.56, | (122.93, | (0.19,  | <0.001 | (1910.40 | (2021.60 | (0.17,  | <0.001 | (269.41, | (158.47, | (-1.96, | <0.001 | (2.08, | (0.70, | (-3.73, | <0.001 |

|                          |          |          |         |        |          |          |         |        |          |          |         |        |        |        |          |        |
|--------------------------|----------|----------|---------|--------|----------|----------|---------|--------|----------|----------|---------|--------|--------|--------|----------|--------|
|                          | 126.58)  | 131.87)  | 0.22)   |        | ,        | ,        | 0.19)   |        | 289.70)  | 168.92)  | -1.73)  |        | 4.36)  | 1.62)  | -3.32)   |        |
|                          |          |          |         |        | 1963.77) | 2058.52) |         |        |          |          |         |        |        |        |          |        |
|                          |          |          |         |        | 1326.74  | 1337.68  |         |        |          |          |         |        |        |        |          |        |
|                          | 65.86    | 63.20    | -0.14   |        | (1239.48 | (1272.90 | 0.03    |        | 230.58   | 72.97    | -3.90   |        | 2.74   | 0.15   | -9.73    |        |
| Cabo Verde               | (48.27,  | (49.72,  | (-0.16, | <0.001 |          |          | (0.02,  | <0.001 | (195.20, | (58.46,  | (-4.24, | <0.001 | (0.26, | (0.00, | (-10.19, | <0.001 |
|                          | 88.93)   | 79.29)   | -0.12)  |        | ,        | ,        | 0.04)   |        | 271.39)  | 90.07)   | -3.57)  |        | 12.52) | 3.62)  | -9.27)   |        |
|                          |          |          |         |        | 1419.29) | 1404.98) |         |        |          |          |         |        |        |        |          |        |
|                          | 49.04    | 46.88    | -0.16   |        | 703.12   | 704.15   | -0.02   |        | 431.40   | 155.90   | -3.44   |        | 6.70   | 2.07   | -3.94    |        |
| Cambodia                 | (46.09,  | (44.64,  | (-0.18, | <0.001 | (691.61, | (695.42, | (-0.07, | 0.583  | (422.29, | (151.80, | (-3.57, | <0.001 | (5.60, | (1.62, | (-4.09,  | <0.001 |
|                          | 52.15)   | 49.20)   | -0.14)  |        | 714.78)  | 712.95)  | 0.04)   |        | 440.68)  | 160.08)  | -3.30)  |        | 7.97)  | 2.61)  | -3.79)   |        |
|                          |          |          |         |        | 1177.24  | 1273.27  |         |        |          |          |         |        |        |        |          |        |
|                          | 74.58    | 80.49    | 0.25    |        | (1161.92 | (1264.27 | 0.27    |        | 138.96   | 89.31    | -1.51   |        | 1.36   | 0.47   | -3.60    |        |
| Cameroon                 | (70.88,  | (78.29,  | (0.18,  | <0.001 |          |          | (0.22,  | <0.001 | (133.74, | (86.95,  | (-1.56, | <0.001 | (0.89, | (0.31, | (-3.73,  | <0.001 |
|                          | 78.45)   | 82.74)   | 0.33)   |        | ,        | ,        | 0.32)   |        | 144.35)  | 91.74)   | -1.45)  |        | 2.03)  | 0.69)  | -3.47)   |        |
|                          |          |          |         |        | 1192.72) | 1282.33) |         |        |          |          |         |        |        |        |          |        |
|                          | 2.07     | 1.76     | -0.54   |        | 32.84    | 30.59    | -0.23   |        | 9.10     | 5.42     | -1.76   |        | 0.12   | 0.06   | -2.05    |        |
| Canada                   | (1.71,   | (1.44,   | (-0.59, | <0.001 | (31.38,  | (29.20,  | (-0.31, | <0.001 | (8.35,   | (4.85,   | (-2.08, | <0.001 | (0.05, | (0.02, | (-2.48,  | <0.001 |
|                          | 2.48)    | 2.14)    | -0.49)  |        | 34.37)   | 32.04)   | -0.16)  |        | 9.91)    | 6.04)    | -1.43)  |        | 0.26)  | 0.18)  | -1.62)   |        |
|                          |          |          |         |        | 1889.22  | 1987.53  |         |        |          |          |         |        |        |        |          |        |
|                          | 116.31   | 122.83   | 0.18    |        | (1852.16 | (1960.91 | 0.17    |        | 278.97   | 207.04   | -1.00   |        | 3.25   | 1.94   | -1.75    |        |
| Central African Republic | (107.51, | (116.48, | (0.16,  | <0.001 |          |          | (0.14,  | <0.001 | (264.44, | (198.33, | (-1.13, | <0.001 | (1.83, | (1.17, | (-1.93,  | <0.001 |
|                          | 125.73)  | 129.47)  | 0.21)   |        | ,        | ,        | 0.21)   |        | 294.15)  | 216.06)  | -0.86)  |        | 5.42)  | 3.06)  | -1.56)   |        |
|                          |          |          |         |        | 1210.37  | 1233.36  |         |        |          |          |         |        |        |        |          |        |
|                          | 79.26    | 78.69    | -0.03   |        | (1189.65 | (1220.48 | 0.06    |        | 164.42   | 110.66   | -1.34   |        | 1.74   | 0.85   | -2.44    |        |
| Chad                     | (74.17,  | (75.59,  | (-0.03, | <0.001 |          |          | (0.05,  | <0.001 | (156.87, | (106.85, | (-1.48, | <0.001 | (1.04, | (0.54, | (-2.69,  | <0.001 |
|                          | 84.64)   | 81.90)   | -0.02)  |        | ,        | ,        | 0.08)   |        | 172.25)  | 114.58)  | -1.20)  |        | 2.76)  | 1.28)  | -2.20)   |        |
|                          |          |          |         |        | 1231.38) | 1246.35) |         |        |          |          |         |        |        |        |          |        |
|                          | 3.39     | 1.90     | -1.99   |        | 37.20    | 28.10    | -0.94   |        | 70.34    | 12.13    | -5.90   |        | 1.19   | 0.18   | -6.19    |        |
| Chile                    | (2.74,   | (1.47,   | (-2.14, | <0.001 | (34.97,  | (26.36,  | (-1.05, | <0.001 | (67.26,  | (11.00,  | (-6.24, | <0.001 | (0.82, | (0.07, | (-6.55,  | <0.001 |
|                          | 4.15)    | 2.43)    | -1.83)  |        | 39.53)   | 29.94)   | -0.84)  |        | 73.52)   | 13.36)   | -5.55)  |        | 1.67)  | 0.40)  | -5.82)   |        |
|                          | 34.47    | 29.33    | -0.57   |        | 655.40   | 550.43   | -0.60   |        | 214.49   | 42.87    | -5.41   |        | 3.18   | 0.28   | -8.41    |        |
| China                    | (34.25,  | (29.10,  | (-0.62, | <0.001 | (654.42, | (549.47, | (-0.64, | <0.001 | (213.92, | (42.60,  | (-6.10, | <0.001 | (3.11, | (0.26, | (-9.04,  | <0.001 |
|                          | 34.69)   | 29.56)   | -0.52)  |        | 656.38)  | 551.40)  | -0.56)  |        | 215.06)  | 43.13)   | -4.72)  |        | 3.25)  | 0.30)  | -7.79)   |        |
|                          | 2.02     | 1.71     | -0.57   |        | 29.06    | 26.39    | -0.34   |        | 52.87    | 8.66     | -5.95   |        | 0.87   | 0.12   | -6.45    |        |
| Colombia                 | (1.69,   | (1.46,   | (-0.83, | <0.001 | (27.80,  | (25.38,  | (-0.40, | <0.001 | (51.16,  | (8.08,   | (-6.82, | <0.001 | (0.66, | (0.06, | (-7.83,  | <0.001 |
|                          | 2.39)    | 1.99)    | -0.32)  |        | 30.36)   | 27.44)   | -0.27)  |        | 54.62)   | 9.27)    | -5.07)  |        | 1.13)  | 0.22)  | -5.06)   |        |

|               |         |          |         |        |          |          |         |        |          |          |         |        |         |         |         |        |
|---------------|---------|----------|---------|--------|----------|----------|---------|--------|----------|----------|---------|--------|---------|---------|---------|--------|
|               | 106.43  | 112.25   | 0.18    |        | 1952.02  | 2034.70  | 0.14    |        | 210.63   | 139.83   | -1.41   |        | 1.92    | 0.70    | -3.43   |        |
| Comoros       | (86.45, | (96.00,  | (0.15,  | <0.001 | (1858.45 | (1962.06 | (0.14,  | <0.001 | (180.79, | (121.31, | (-2.63, | 0.026  | (0.16,  | (0.02,  | (-6.90, | 0.061  |
|               | 130.33) | 130.60)  | 0.21)   |        | ,        | ,        | 0.15)   |        | 244.52)  | 160.51)  | -0.17)  |        | 9.06)   | 4.15)   | 0.17)   |        |
|               |         |          |         |        | 2049.52) | 2109.46) |         |        |          |          |         |        |         |         |         |        |
|               |         |          |         |        | 1887.60  | 1941.72  |         |        |          |          |         |        |         |         |         |        |
| Congo         | 105.86  | 108.18   | 0.08    |        | 1848.20  | (1915.55 | 0.08    |        | 216.19   | 131.30   | -1.67   |        | 2.18    | 0.68    | -3.99   |        |
|               | (97.03, | (102.13, | (0.06,  | <0.001 | ,        | ,        | (-0.05, | 0.234  | (202.63, | (124.54, | (-1.94, | <0.001 | (1.00,  | (0.28,  | (-4.77, | <0.001 |
|               | 115.39) | 114.51)  | 0.09)   |        | ,        | ,        | 0.22)   |        | 230.47)  | 138.33)  | -1.40)  |        | 4.22)   | 1.39)   | -3.20)  |        |
|               |         |          |         |        | 1927.70) | 1968.16) |         |        |          |          |         |        |         |         |         |        |
|               |         |          |         |        | 85.27    | 90.36    | 0.22    |        | 135.52   | 58.73    | -2.83   |        | 2.20    | 0.91    | -2.99   |        |
| Cook Islands  | (0.00,  | (0.00,   | (-0.42, | <0.001 | (17.91,  | (17.34,  | (0.13,  | <0.001 | (42.41,  | (6.09,   | (-2.98, | <0.001 | (0.00,  | (0.00,  | (-3.20, | <0.001 |
|               | 131.27) | 133.98)  | -0.13)  |        | 258.11)  | 275.79)  | 0.31)   |        | 331.39)  | 227.10)  | -2.68)  |        | 125.08) | 125.68) | -2.77)  |        |
|               |         |          |         |        | 1500.64  | 1475.88  | -0.05   |        | 142.08   | 96.53    | -1.28   |        | 1.22    | 0.45    | -3.24   |        |
| Costa Rica    | (63.15, | (61.28,  | (-0.16, | <0.001 | (1470.75 | (1451.99 | (-0.06, | <0.001 | (132.92, | (90.51,  | (-1.62, | <0.001 | (0.51,  | (0.14,  | (-4.14, | <0.001 |
|               | 76.04)  | 71.82)   | -0.13)  |        | ,        | ,        | -0.04)  |        | 151.73)  | 102.85)  | -0.94)  |        | 2.50)   | 1.14)   | -2.33)  |        |
|               |         |          |         |        | 1531.01) | 1500.08) |         |        |          |          |         |        |         |         |         |        |
|               |         |          |         |        | 1248.66  | 1290.53  | 0.12    |        | 143.67   | 95.27    | -1.39   |        | 1.37    | 0.55    | -3.05   |        |
| Cote d'Ivoire | (76.07, | (79.67,  | (0.09,  | <0.001 | (1234.04 | (1280.85 | (0.11,  | <0.001 | (138.78, | (92.66,  | (-1.52, | <0.001 | (0.93,  | (0.37,  | (-3.39, | <0.001 |
|               | 83.31)  | 84.52)   | 0.12)   |        | ,        | ,        | 0.12)   |        | 148.71)  | 97.94)   | -1.25)  |        | 1.98)   | 0.80)   | -2.72)  |        |
|               |         |          |         |        | 1263.44) | 1300.27) |         |        |          |          |         |        |         |         |         |        |
|               |         |          |         |        | 5.96     | 5.53     | -0.31   |        | 14.46    | 3.08     | -5.40   |        | 0.24    | 0.05    | -5.39   |        |
| Croatia       | (0.30,  | (0.19,   | (-0.85, | 0.012  | (4.49,   | (3.89,   | (-0.48, | 0.001  | (12.10,  | (1.89,   | (-6.36, | <0.001 | (0.03,  | (0.00,  | (-7.00, | <0.001 |
|               | 1.56)   | 1.70)    | -0.11)  |        | 7.78)    | 7.72)    | -0.13)  |        | 17.17)   | 4.83)    | -4.43)  |        | 0.88)   | 0.86)   | -3.75)  |        |
|               |         |          |         |        | 1364.81  | 1391.55  | 0.07    |        | 210.01   | 103.81   | -2.41   |        | 2.48    | 0.65    | -4.55   |        |
| Cuba          | (62.42, | (61.83,  | (-0.03, | 0.624  | (1349.90 | (1374.16 | (0.06,  | <0.001 | (204.09, | (99.12,  | (-2.72, | <0.001 | (1.87,  | (0.33,  | (-5.13, | <0.001 |
|               | 68.87)  | 69.63)   | 0.04)   |        | ,        | ,        | 0.08)   |        | 216.06)  | 108.68)  | -2.09)  |        | 3.24)   | 1.15)   | -3.96)  |        |
|               |         |          |         |        | 1379.85) | 1409.11) |         |        |          |          |         |        |         |         |         |        |
|               |         |          |         |        | 5.97     | 5.56     | -0.26   |        | 5.42     | 1.46     | -4.75   |        | 0.09    | 0.02    | -5.80   |        |
| Cyprus        | (0.00,  | (0.00,   | (-1.11, | <0.001 | (2.72,   | (2.96,   | (-0.30, | <0.001 | (2.37,   | (0.35,   | (-5.87, | <0.001 | (0.00,  | (0.00,  | (-6.36, | <0.001 |
|               | 3.47)   | 2.98)    | -0.56)  |        | 11.49)   | 9.97)    | -0.21)  |        | 10.77)   | 4.62)    | -3.61)  |        | 2.92)   | 2.58)   | -5.23)  |        |
|               |         |          |         |        | 6.81     | 7.38     | 0.27    |        | 17.68    | 4.24     | -4.64   |        | 0.30    | 0.07    | -4.78   |        |
| Czechia       | (0.48,  | (0.49,   | (-0.05, | 0.131  | (5.68,   | (6.09,   | (0.00,  | 0.049  | (15.85,  | (3.29,   | (-5.25, | <0.001 | (0.11,  | (0.00,  | (-5.45, | <0.001 |
|               | 1.36)   | 1.50)    | 0.40)   |        | 8.11)    | 8.90)    | 0.53)   |        | 19.68)   | 5.41)    | -4.01)  |        | 0.69)   | 0.45)   | -4.10)  |        |
|               |         |          |         |        |          |          |         |        |          |          |         |        |         |         |         |        |
| Democratic    | 36.21   | 38.17    | 0.18    | <0.001 | 622.48   | 635.52   | 0.08    | 0.002  | 179.65   | 111.16   | -1.62   | <0.001 | 2.57    | 1.39    | -2.07   | <0.001 |

|                                  |                  |                  |                |        |                    |                    |                |        |                  |                  |                |              |               |                |                |        |
|----------------------------------|------------------|------------------|----------------|--------|--------------------|--------------------|----------------|--------|------------------|------------------|----------------|--------------|---------------|----------------|----------------|--------|
| People's Republic of Korea       | (34.44, 38.05)   | (36.41, 39.98)   | (0.15, 0.21)   |        | (614.99, 630.05)   | (628.38, 642.73)   | (0.03, 0.13)   |        | (175.55, 183.82) | (108.20, 114.18) | (-1.69, -1.54) | (2.10, 3.12) | (1.08, 1.77)  | (-2.17, -1.98) |                |        |
| Democratic Republic of the Congo | 106.97           | 111.51           | 0.15           | <0.001 | 1891.49            | 1939.88            | 0.09           |        | 221.70           | 142.47           | -1.54          | 2.25         | 0.87          | -3.16          |                |        |
|                                  | (104.64, 109.35) | (109.97, 113.06) | (0.08, 0.22)   |        | (1881.30, 1901.72) | (1933.23, 1946.55) | (0.07, 0.12)   | <0.001 | (218.16, 225.28) | (140.65, 144.32) | (-1.61, -1.47) | <0.001       | (1.90, 2.65)  | (0.73, 1.04)   | (-3.29, -3.03) | <0.001 |
| Denmark                          | 0.31             | 0.25             | -0.74          | 0.003  | 5.34               | 4.96               | -0.25          |        | 4.42             | 1.12             | -4.62          | 0.07         | 0.01          | -5.28          |                |        |
|                                  | (0.06, 0.95)     | (0.04, 0.90)     | (-1.22, -0.26) |        | (3.96, 7.06)       | (3.60, 6.68)       | (-0.32, -0.18) | <0.001 | (3.18, 6.00)     | (0.54, 2.09)     | (-5.08, -4.15) | <0.001       | (0.00, 0.58)  | (0.00, 0.51)   | (-6.66, -3.88) | <0.001 |
| Djibouti                         | 101.42           | 107.76           | 0.20           | <0.001 | 1887.25            | 2009.87            | 0.22           |        | 167.58           | 122.72           | -1.02          | 1.28         | 0.45          | -3.43          |                |        |
|                                  | (81.99, 124.63)  | (94.73, 122.12)  | (0.18, 0.21)   |        | (1796.33, 1981.95) | (1953.54, 2067.49) | (0.21, 0.22)   | <0.001 | (141.30, 197.76) | (109.11, 137.64) | (-1.28, -0.76) | <0.001       | (0.04, 7.74)  | (0.01, 2.55)   | (-3.95, -2.91) | <0.001 |
| Dominica                         | 74.81            | 73.45            | -0.05          | 0.050  | 1387.19            | 1396.90            | 0.02           |        | 239.02           | 149.34           | -1.64          | 2.92         | 1.39          | -2.53          |                |        |
|                                  | (37.11, 138.91)  | (34.00, 138.63)  | (-0.10, 0.00)  |        | (1194.72, 1604.13) | (1198.01, 1619.59) | (0.02, 0.03)   | <0.001 | (162.50, 341.60) | (89.65, 234.03)  | (-2.10, -1.18) | <0.001       | (0.00, 40.08) | (0.00, 32.80)  | (-3.11, -1.95) | <0.001 |
| Dominican Republic               | 70.61            | 66.83            | -0.18          | <0.001 | 1326.43            | 1327.94            | 0.01           |        | 182.86           | 125.55           | -1.29          | 1.97         | 1.04          | -2.21          |                |        |
|                                  | (66.62, 74.81)   | (63.49, 70.31)   | (-0.22, -0.15) |        | (1308.24, 1344.83) | (1312.82, 1343.19) | (0.00, 0.01)   | 0.059  | (176.15, 189.79) | (120.93, 130.31) | (-1.62, -0.96) | <0.001       | (1.32, 2.85)  | (0.66, 1.56)   | (-2.80, -1.60) | <0.001 |
| Ecuador                          | 68.21            | 67.74            | -0.03          | <0.001 | 1282.39            | 1300.46            | 0.05           |        | 140.59           | 82.28            | -1.85          | 1.34         | 0.35          | -4.85          |                |        |
|                                  | (64.78, 71.79)   | (65.10, 70.47)   | (-0.04, -0.02) |        | (1266.86, 1298.08) | (1288.69, 1312.31) | (0.03, 0.07)   | <0.001 | (135.43, 145.90) | (79.34, 85.31)   | (-2.27, -1.44) | <0.001       | (0.88, 1.98)  | (0.18, 0.60)   | (-5.89, -3.80) | <0.001 |
| Egypt                            | 47.86            | 48.95            | 0.08           | <0.001 | 856.34             | 855.27             | -0.00          |        | 234.21           | 80.08            | -3.66          | 3.14         | 0.65          | -5.30          |                |        |
|                                  | (46.56, 49.18)   | (47.99, 49.93)   | (0.06, 0.10)   |        | (850.72, 862.00)   | (851.21, 859.34)   | (-0.04, 0.03)  | 0.824  | (231.30, 237.16) | (78.84, 81.33)   | (-4.04, -3.28) | <0.001       | (2.81, 3.51)  | (0.54, 0.77)   | (-5.80, -4.80) | <0.001 |
| El Salvador                      | 76.15            | 74.45            | -0.08          | <0.001 | 1395.87            | 1406.49            | 0.03           |        | 101.74           | 74.32            | -1.06          | 0.60         | 0.12          | -5.46          |                |        |
|                                  | (71.15, 81.45)   | (69.95, 79.17)   | (-0.09, -0.07) |        | (1373.16, 1418.89) | (1386.50, 1426.70) | (0.02, 0.04)   | <0.001 | (95.64, 108.17)  | (69.78, 79.09)   | (-1.22, -0.89) | <0.001       | (0.22, 1.37)  | (0.01, 0.52)   | (-6.05, -4.87) | <0.001 |
| Equatorial Guinea                | 108.66           | 90.68            | -0.64          | <0.001 | 1912.47            | 1788.79            | -0.23          | <0.001 | 236.97           | 101.62           | -2.90          | <0.001       | 2.51          | 0.30           | -7.21          | <0.001 |

|          |                     |                     |                   |        |                       |                       |                   |        |                     |                     |                   |        |                  |                  |                   |        |
|----------|---------------------|---------------------|-------------------|--------|-----------------------|-----------------------|-------------------|--------|---------------------|---------------------|-------------------|--------|------------------|------------------|-------------------|--------|
|          | (87.57,<br>133.66)  | (80.15,<br>102.35)  | (-0.71,<br>-0.57) |        | (1817.97,<br>,        | (1739.44,<br>,        | (-0.27,<br>-0.19) |        | (204.01,<br>273.95) | (90.06,<br>114.37)  | (-3.11,<br>-2.69) |        | (0.28,<br>9.72)  | (0.00,<br>2.22)  | (-7.49,<br>-6.93) |        |
|          |                     |                     |                   |        | 2010.85)              | 1839.28)              |                   |        |                     |                     |                   |        |                  |                  |                   |        |
|          | 134.29              | 135.00              | 0.03              |        | 2294.89               | 2327.89               | 0.04              |        | 249.16              | 166.62              | -1.41             |        | 2.33             | 0.93             | -3.16             |        |
| Eritrea  | (125.19,<br>143.94) | (129.13,<br>141.10) | (-0.02,<br>0.07)  | 0.206  | (2255.36,<br>2334.98) | (2302.45,<br>2353.56) | (-0.06,<br>0.13)  | 0.459  | (236.18,<br>262.71) | (159.85,<br>173.62) | (-1.56,<br>-1.26) | <0.001 | (1.23,<br>4.10)  | (0.49,<br>1.64)  | (-3.32,<br>-2.99) | <0.001 |
|          | 3.54                | 2.82                | -0.77             |        | 27.93                 | 25.74                 | -0.27             |        | 30.27               | 8.72                | -3.75             |        | 0.52             | 0.13             | -4.37             |        |
| Estonia  | (1.77,<br>6.50)     | (1.07,<br>6.62)     | (-0.83,<br>-0.72) | <0.001 | (22.24,<br>34.72)     | (19.28,<br>34.00)     | (-0.32,<br>-0.23) | <0.001 | (24.42,<br>37.20)   | (5.29,<br>14.00)    | (-4.86,<br>-2.62) | <0.001 | (0.04,<br>2.36)  | (0.00,<br>2.90)  | (-5.88,<br>-2.83) | <0.001 |
|          | 102.24              | 101.31              | -0.03             |        | 1660.86               | 1665.99               | 0.01              |        | 219.92              | 141.24              | -1.55             |        | 2.36             | 1.04             | -2.86             |        |
| Eswatini | (87.62,<br>118.96)  | (89.56,<br>114.27)  | (-0.06,<br>-0.01) | 0.003  | (1597.72,<br>1726.13) | (1616.66,<br>1716.52) | (0.00,<br>0.03)   | 0.022  | (197.00,<br>245.05) | (127.10,<br>156.60) | (-1.83,<br>-1.26) | <0.001 | (0.56,<br>6.93)  | (0.18,<br>3.40)  | (-3.36,<br>-2.36) | <0.001 |
|          | 108.39              | 113.20              | 0.15              |        | 1696.24               | 1904.85               | 0.40              |        | 263.82              | 127.51              | -2.47             |        | 3.01             | 0.60             | -5.39             |        |
| Ethiopia | (106.36,<br>110.45) | (111.84,<br>114.57) | (0.14,<br>0.16)   | <0.001 | (1687.92,<br>1704.59) | (1899.03,<br>1910.68) | (0.36,<br>0.44)   | <0.001 | (260.56,<br>267.13) | (126.01,<br>129.02) | (-2.59,<br>-2.36) | <0.001 | (2.67,<br>3.39)  | (0.51,<br>0.72)  | (-5.54,<br>-5.25) | <0.001 |
|          | 28.20               | 33.46               | 0.60              |        | 438.04                | 683.17                | 1.50              |        | 584.63              | 360.48              | -1.62             |        | 9.33             | 5.44             | -1.85             |        |
| Fiji     | (20.51,<br>37.96)   | (25.44,<br>43.22)   | (0.58,<br>0.62)   | <0.001 | (405.83,<br>472.25)   | (645.01,<br>723.03)   | (1.42,<br>1.58)   | <0.001 | (547.34,<br>623.91) | (332.91,<br>389.74) | (-1.95,<br>-1.29) | <0.001 | (5.16,<br>15.70) | (2.56,<br>10.17) | (-2.39,<br>-1.31) | <0.001 |
|          | 0.29                | 0.24                | -0.76             |        | 5.23                  | 4.75                  | -0.37             |        | 3.98                | 1.16                | -4.18             |        | 0.06             | 0.02             | -3.72             |        |
| Finland  | (0.05,<br>0.99)     | (0.03,<br>0.94)     | (-1.56,<br>0.05)  | 0.064  | (3.83,<br>7.01)       | (3.38,<br>6.55)       | (-0.44,<br>-0.30) | <0.001 | (2.80,<br>5.55)     | (0.54,<br>2.21)     | (-4.95,<br>-3.40) | <0.001 | (0.00,<br>0.65)  | (0.00,<br>0.59)  | (-4.78,<br>-2.63) | <0.001 |
|          | 0.43                | 0.36                | -0.61             |        | 7.59                  | 6.93                  | -0.32             |        | 11.85               | 5.19                | -2.83             |        | 0.19             | 0.08             | -3.02             |        |
| France   | (0.32,<br>0.57)     | (0.26,<br>0.50)     | (-1.02,<br>-0.20) | 0.004  | (7.08,<br>8.12)       | (6.42,<br>7.46)       | (-0.45,<br>-0.18) | <0.001 | (11.21,<br>12.50)   | (4.76,<br>5.66)     | (-3.15,<br>-2.50) | <0.001 | (0.12,<br>0.29)  | (0.03,<br>0.16)  | (-3.77,<br>-2.26) | <0.001 |
|          | 87.90               | 90.87               | 0.11              |        | 1794.40               | 1860.18               | 0.12              |        | 158.50              | 105.72              | -1.38             |        | 1.27             | 0.31             | -4.70             |        |
| Gabon    | (75.22,<br>102.39)  | (81.77,<br>100.76)  | (0.10,<br>0.13)   | <0.001 | (1733.06,<br>1857.56) | (1817.52,<br>1903.63) | (0.11,<br>0.13)   | <0.001 | (140.30,<br>178.60) | (95.70,<br>116.55)  | (-1.47,<br>-1.29) | <0.001 | (0.16,<br>4.83)  | (0.01,<br>1.67)  | (-5.15,<br>-4.24) | <0.001 |
|          | 76.82               | 81.08               | 0.19              |        | 1284.46               | 1360.98               | 0.20              |        | 128.62              | 93.49               | -1.03             |        | 1.10             | 0.47             | -2.75             |        |
| Gambia   | (65.16,<br>)        | (73.39,<br>)        | (0.17,<br>)       | <0.001 | (1233.65,<br>)        | (1327.90,<br>)        | (0.19,<br>)       | <0.001 | (112.99,<br>)       | (84.99,<br>)        | (-1.48,<br>)      | <0.001 | (0.14,<br>)      | (0.07,<br>)      | (-3.82,<br>)      | <0.001 |

|           |         |         |         |        |          |          |         |        |          |          |         |        |        |        |         |        |
|-----------|---------|---------|---------|--------|----------|----------|---------|--------|----------|----------|---------|--------|--------|--------|---------|--------|
|           | 90.28)  | 89.43)  | 0.20)   |        | ,        | ,        | 0.22)   |        | 146.09)  | 102.68)  | -0.58)  |        | 4.51)  | 1.77)  | -1.67)  |        |
|           |         |         |         |        | 1337.07) | 1394.74) |         |        |          |          |         |        |        |        |         |        |
|           |         |         |         |        | 1175.79  | 1205.91  |         |        |          |          |         |        |        |        |         |        |
|           | 54.64   | 56.32   | 0.12    |        |          |          | 0.08    |        | 167.78   | 117.24   | -1.33   |        | 1.81   | 0.97   | -2.30   |        |
| Georgia   | (50.25, | (50.04, | (0.10,  | <0.001 | (1155.44 | (1177.41 | (0.04,  | <0.001 | (160.11, | (108.37, | (-2.88, | 0.099  | (1.10, | (0.33, | (-4.58, | 0.054  |
|           | 59.32)  | 63.23)  | 0.13)   |        | ,        | ,        | 0.13)   |        | 175.74)  | 126.70)  | 0.25)   |        | 2.83)  | 2.32)  | 0.04)   |        |
|           |         |         |         |        | 1196.43) | 1234.99) |         |        |          |          |         |        |        |        |         |        |
|           | 0.45    | 0.35    | -0.90   |        | 7.61     | 6.78     | -0.45   |        | 8.45     | 3.74     | -2.92   |        | 0.14   | 0.06   | -2.86   |        |
| Germany   | (0.35,  | (0.25,  | (-1.13, | <0.001 | (7.16,   | (6.32,   | (-0.59, | <0.001 | (7.98,   | (3.41,   | (-3.14, | <0.001 | (0.08, | (0.02, | (-3.35, | <0.001 |
|           | 0.58)   | 0.47)   | -0.67)  |        | 8.08)    | 7.26)    | -0.32)  |        | 8.93)    | 4.10)    | -2.70)  |        | 0.22)  | 0.12)  | -2.36)  |        |
|           |         |         |         |        | 1260.89  | 1269.95  | 0.03    |        | 146.61   | 91.07    | -1.64   |        | 1.42   | 0.50   | -3.49   |        |
| Ghana     | (74.89, | (74.06, | (-0.12, | <0.001 | (1247.99 | (1261.64 | (0.01,  | 0.004  | (142.25, | (88.86,  | (-1.82, | <0.001 | (1.02, | (0.35, | (-3.79, | <0.001 |
|           | 81.21)  | 78.10)  | -0.04)  |        | ,        | ,        | 0.05)   |        | 151.09)  | 93.33)   | -1.45)  |        | 1.94)  | 0.70)  | -3.20)  |        |
|           |         |         |         |        | 1273.91) | 1278.31) |         |        |          |          |         |        |        |        |         |        |
|           | 0.40    | 0.33    | -0.66   |        | 7.06     | 6.55     | -0.25   |        | 6.62     | 2.58     | -3.06   |        | 0.11   | 0.04   | -3.20   |        |
| Greece    | (0.17,  | (0.11,  | (-1.09, | 0.003  | (5.91,   | (5.29,   | (-0.31, | <0.001 | (5.52,   | (1.83,   | (-3.88, | <0.001 | (0.01, | (0.00, | (-4.48, | <0.001 |
|           | 0.81)   | 0.82)   | -0.23)  |        | 8.38)    | 8.04)    | -0.18)  |        | 7.90)    | 3.55)    | -2.23)  |        | 0.39)  | 0.39)  | -1.91)  |        |
|           | 3.13    | 2.02    | -1.51   |        | 42.58    | 32.17    | -0.97   |        | 35.52    | 9.84     | -4.28   |        | 0.58   | 0.14   | -4.81   |        |
| Greenland | (0.00,  | (0.00,  | (-1.62, | <0.001 | (13.69,  | (7.22,   | (-1.04, | <0.001 | (10.09,  | (0.26,   | (-4.81, | <0.001 | (0.00, | (0.00, | (-5.68, | <0.001 |
|           | 51.81)  | 48.48)  | -1.40)  |        | 108.63)  | 95.63)   | -0.90)  |        | 98.55)   | 61.48)   | -3.75)  |        | 47.75) | 45.13) | -3.94)  |        |
|           |         |         |         |        | 1400.36  | 1392.06  | -0.02   |        | 357.78   | 147.99   | -3.04   |        | 4.94   | 1.39   | -4.28   |        |
| Grenada   | (38.95, | (37.97, | (-0.26, | <0.001 | (1223.21 | (1230.87 | (-0.04, | 0.047  | (270.07, | (98.46,  | (-3.47, | <0.001 | (0.04, | (0.00, | (-4.75, | <0.001 |
|           | 130.54) | 119.33) | -0.12)  |        | ,        | ,        | 0.00)   |        | 466.46)  | 214.72)  | -2.61)  |        | 36.85) | 24.74) | -3.80)  |        |
|           |         |         |         |        | 1597.55) | 1569.45) |         |        |          |          |         |        |        |        |         |        |
|           | 31.88   | 33.25   | 0.14    |        | 866.80   | 912.65   | 0.18    |        | 200.86   | 159.24   | -0.71   |        | 2.62   | 1.91   | -1.04   |        |
| Guam      | (14.63, | (15.60, | (0.14,  | <0.001 | (762.05, | (805.08, | (0.14,  | <0.001 | (152.22, | (116.06, | (-1.17, | 0.003  | (0.02, | (0.00, | (-1.66, | 0.001  |
|           | 60.82)  | 62.64)  | 0.15)   |        | 982.22)  | 1030.97) | 0.22)   |        | 260.43)  | 213.59)  | -0.24)  |        | 18.77) | 17.76) | -0.43)  |        |
|           |         |         |         |        | 1353.95  | 1413.37  | 0.15    |        | 105.61   | 76.28    | -1.14   |        | 0.70   | 0.15   | -5.32   |        |
| Guatemala | (77.87, | (81.20, | (0.05,  | <0.001 | (1335.00 | (1401.73 | (0.13,  | <0.001 | (100.34, | (73.59,  | (-1.47, | <0.001 | (0.33, | (0.06, | (-6.74, | <0.001 |
|           | 86.99)  | 86.82)  | 0.10)   |        | ,        | ,        | 0.17)   |        | 111.10)  | 79.04)   | -0.80)  |        | 1.33)  | 0.34)  | -3.89)  |        |
|           |         |         |         |        | 1373.11) | 1425.07) |         |        |          |          |         |        |        |        |         |        |
|           | 62.01   | 68.88   | 0.36    |        | 875.19   | 1040.36  | 0.59    |        | 172.29   | 107.05   | -1.63   |        | 2.13   | 0.94   | -2.81   |        |
| Guinea    | (57.59, | (65.77, | (0.34,  | <0.001 | (858.11, | (1027.86 | (0.55,  | <0.001 | (164.79, | (103.08, | (-1.83, | <0.001 | (1.37, | (0.60, | (-2.99, | <0.001 |
|           | 66.69)  | 72.12)  | 0.38)   |        | 892.55)  | ,        | 0.63)   |        | 180.05)  | 111.14)  | -1.43)  |        | 3.19)  | 1.42)  | -2.63)  |        |

|               |         |         |         |        |          |          |         |        |          |          |         |        |         |        |         |        |
|---------------|---------|---------|---------|--------|----------|----------|---------|--------|----------|----------|---------|--------|---------|--------|---------|--------|
|               |         |         |         |        |          | 1052.98) |         |        |          |          |         |        |         |        |         |        |
|               |         |         |         |        | 1235.63  | 1319.29  |         |        |          |          |         |        |         |        |         |        |
|               | 81.55   | 86.54   | 0.20    |        | (1186.64 | (1284.51 | 0.22    |        | 245.64   | 131.93   | -2.13   |        | 3.06    | 1.14   | -3.37   |        |
| Guinea-Bissau | (69.64, | (77.97, | (0.20,  | <0.001 | ,        | ,        | (0.21,  | <0.001 | (224.11, | (121.09, | (-2.27, | <0.001 | (1.11,  | (0.35, | (-3.56, | <0.001 |
|               | 95.11)  | 95.87)  | 0.21)   |        | 1286.27) | 1354.84) | 0.24)   |        | 268.84)  | 143.54)  | -1.99)  |        | 6.99)   | 2.86)  | -3.18)  |        |
|               |         |         |         |        | 1406.75  | 1403.30  |         |        |          |          |         |        |         |        |         |        |
|               | 85.93   | 82.02   | -0.16   |        | (1350.40 | (1345.83 | -0.01   |        | 247.28   | 164.26   | -1.40   |        | 3.04    | 1.66   | -2.03   |        |
| Guyana        | (72.86, | (68.79, | (-0.18, | <0.001 | ,        | ,        | (-0.03, | 0.416  | (223.74, | (144.85, | (-2.14, | <0.001 | (0.96,  | (0.28, | (-3.09, | <0.001 |
|               | 100.91) | 97.18)  | -0.14)  |        | 1465.02) | 1462.69) | 0.01)   |        | 272.79)  | 185.64)  | -0.65)  |        | 7.46)   | 5.41)  | -0.95)  |        |
|               |         |         |         |        | 1370.97  | 1423.80  |         |        | 1022.55  |          |         |        | 16.21   | 6.19   | -3.24   |        |
|               | 95.83   | 98.47   | 0.09    |        | (1350.57 | (1409.80 | 0.13    |        | (1004.69 | 434.51   | -2.87   |        | (14.01, | (5.30, | (-3.40, | <0.001 |
| Haiti         | (90.61, | (94.82, | (0.04,  | <0.001 | ,        | ,        | (0.12,  | <0.001 | ,        | (426.77, | (-3.02, | <0.001 | (14.01, | (5.30, | (-3.40, | <0.001 |
|               | 101.29) | 102.23) | 0.14)   |        | 1391.63) | 1437.91) | 0.14)   |        | 1040.66) | 442.35)  | -2.72)  |        | 18.66)  | 7.20)  | -3.08)  |        |
|               |         |         |         |        | 1430.76  | 1429.07  |         |        | 84.07    | 72.64    | -0.45   |        | 0.28    | 0.09   | -3.91   |        |
|               | 87.46   | 85.29   | -0.07   |        | (1405.36 | (1413.18 | 0.00    |        | (77.94,  | (69.08,  | (-0.54, | <0.001 | (0.04,  | (0.01, | (-4.71, | <0.001 |
| Honduras      | (81.53, | (81.53, | (-0.10, | <0.001 | ,        | ,        | (-0.03, | 0.941  | 90.59)   | 76.34)   | -0.37)  |        | 1.03)   | 0.35)  | -3.11)  |        |
|               | 93.76)  | 89.19)  | -0.04)  |        | 1456.54) | 1445.10) | 0.03)   |        |          |          |         |        |         |        |         |        |
|               | 1.32    | 0.99    | -0.94   |        | 10.05    | 8.77     | -0.47   |        | 43.35    | 7.15     | -5.94   |        | 0.76    | 0.12   | -6.27   |        |
|               | (0.86,  | (0.56,  | (-1.11, | <0.001 | (8.67,   | (7.32,   | (-0.57, | <0.001 | (40.50,  | (5.87,   | (-6.65, | <0.001 | (0.43,  | (0.01, | (-6.88, | <0.001 |
| Hungary       | 1.94)   | 1.66)   | -0.77)  |        | 11.59)   | 10.46)   | -0.37)  |        | 46.37)   | 8.66)    | -5.22)  |        | 1.28)   | 0.52)  | -5.66)  |        |
|               | 0.43    | 0.45    | 0.19    |        | 8.39     | 8.34     | 0.01    |        | 4.64     | 2.33     | -2.39   |        | 0.07    | 0.03   | -3.12   |        |
|               | (0.00,  | (0.00,  | (0.06,  | 0.005  | (2.41,   | (2.64,   | (-0.09, | 0.885  | (0.72,   | (0.14,   | (-2.65, | <0.001 | (0.00,  | (0.00, | (-4.62, | <0.001 |
| Iceland       | 8.70)   | 8.38)   | 0.32)   |        | 21.24)   | 20.39)   | 0.11)   |        | 15.69)   | 11.49)   | -2.14)  |        | 8.01)   | 7.63)  | -1.60)  |        |
|               |         |         |         |        | 1175.11  | 1174.14  |         |        | 510.69   | 269.46   | -2.27   |        | 7.59    | 3.62   | -2.63   |        |
|               | 91.15   | 86.59   | -0.17   |        | (1173.43 | (1172.88 | -0.01   |        | (509.58, | (268.86, | (-2.84, | <0.001 | (7.46,  | (3.55, | (-3.28, | <0.001 |
| India         | (90.69, | (86.26, | (-0.25, | <0.001 | ,        | ,        | (-0.09, | 0.884  | 511.80)  | 270.06)  | -1.69)  |        | 7.73)   | 3.69)  | -1.97)  |        |
|               | 91.61)  | 86.93)  | -0.10)  |        | 1176.79) | 1175.39) | 0.08)   |        |          |          |         |        |         |        |         |        |
|               | 11.90   | 13.58   | 0.46    |        | 178.86   | 213.21   | 0.61    |        | 76.83    | 29.75    | -3.20   |        | 1.13    | 0.32   | -4.24   |        |
|               | (11.56, | (13.27, | (0.43,  | <0.001 | (177.53, | (211.96, | (0.60,  | <0.001 | (75.95,  | (29.28,  | (-3.28, | <0.001 | (1.03,  | (0.27, | (-4.37, | <0.001 |
| Indonesia     | 12.25)  | 13.90)  | 0.48)   |        | 180.20)  | 214.46)  | 0.62)   |        | 77.71)   | 30.22)   | -3.12)  |        | 1.25)   | 0.37)  | -4.11)  |        |
|               | 42.67   | 41.78   | -0.07   |        | 749.50   | 755.80   | 0.03    |        | 103.71   | 53.59    | -2.24   |        | 1.12    | 0.29   | -4.57   |        |
| Iran (Islamic | (41.47, | (40.76, | (-0.08, | <0.001 | (744.26, | (751.66, | (0.02,  | <0.001 | (101.76, | (52.49,  | (-2.50, | <0.001 | (0.93,  | (0.21, | (-4.92, | <0.001 |
| Republic of)  | 43.89)  | 42.82)  | -0.06)  |        | 754.77)  | 759.96)  | 0.04)   |        | 105.68)  | 54.71)   | -1.99)  |        | 1.35)   | 0.38)  | -4.21)  |        |



|            |          |          |         |        |          |          |         |        |          |          |         |        |        |        |         |        |
|------------|----------|----------|---------|--------|----------|----------|---------|--------|----------|----------|---------|--------|--------|--------|---------|--------|
|            | 46.74    | 46.66    | -0.01   |        | 775.95   | 788.41   | 0.06    |        | 150.78   | 58.32    | -3.22   |        | 1.94   | 0.36   | -5.59   |        |
| Iraq       | (44.41,  | (45.27,  | (-0.03, | 0.728  | (766.00, | (782.55, | (0.04,  | <0.001 | (146.33, | (56.72,  | (-3.56, | <0.001 | (1.46, | (0.24, | (-6.08, | <0.001 |
|            | 49.17)   | 48.08)   | 0.02)   |        | 786.01)  | 794.31)  | 0.07)   |        | 155.35)  | 59.95)   | -2.88)  |        | 2.55)  | 0.52)  | -5.09)  |        |
|            | 0.51     | 0.39     | -0.90   |        | 7.75     | 7.32     | -0.19   |        | 8.01     | 2.45     | -4.05   |        | 0.13   | 0.03   | -4.31   |        |
| Ireland    | (0.12,   | (0.09,   | (-1.05, | <0.001 | (5.80,   | (5.58,   | (-0.23, | <0.001 | (6.01,   | (1.50,   | (-5.34, | <0.001 | (0.00, | (0.00, | (-6.07, | <0.001 |
|            | 1.40)    | 1.14)    | -0.74)  |        | 10.17)   | 9.46)    | -0.14)  |        | 10.46)   | 3.81)    | -2.74)  |        | 0.81)  | 0.60)  | -2.52)  |        |
|            | 0.70     | 0.43     | -1.68   |        | 9.33     | 7.55     | -0.74   |        | 23.05    | 7.93     | -3.63   |        | 0.39   | 0.13   | -3.76   |        |
| Israel     | (0.28,   | (0.18,   | (-1.92, | <0.001 | (7.49,   | (6.27,   | (-0.81, | <0.001 | (20.10,  | (6.62,   | (-4.26, | <0.001 | (0.10, | (0.02, | (-4.39, | <0.001 |
|            | 1.48)    | 0.90)    | -1.44)  |        | 11.49)   | 9.02)    | -0.66)  |        | 26.32)   | 9.43)    | -2.99)  |        | 1.04)  | 0.46)  | -3.14)  |        |
|            | 1.29     | 0.37     | -4.19   |        | 21.60    | 11.82    | -2.08   |        | 22.65    | 6.80     | -4.06   |        | 0.37   | 0.10   | -4.54   |        |
| Italy      | (1.08,   | (0.26,   | (-4.67, | <0.001 | (20.72,  | (11.06,  | (-2.19, | <0.001 | (21.75,  | (6.24,   | (-4.43, | <0.001 | (0.26, | (0.04, | (-4.86, | <0.001 |
|            | 1.53)    | 0.53)    | -3.71)  |        | 22.50)   | 12.61)   | -1.97)  |        | 23.57)   | 7.40)    | -3.70)  |        | 0.50)  | 0.20)  | -4.21)  |        |
|            | 66.32    | 68.69    | 0.12    |        | 1345.71  | 1426.64  | 0.20    |        | 230.60   | 143.45   | -1.53   |        | 2.69   | 1.24   | -2.51   |        |
| Jamaica    | (59.51,  | (62.19,  | (0.08,  | <0.001 | (1313.22 | (1396.58 | (0.20,  | <0.001 | (217.39, | (134.04, | (-2.48, | 0.002  | (1.44, | (0.52, | (-4.35, | 0.009  |
|            | 73.79)   | 75.71)   | 0.16)   |        | '        | '        | 0.21)   |        | 244.48)  | 153.38)  | -0.57)  |        | 4.71)  | 2.54)  | -0.64)  |        |
|            | 0.66     | 0.27     | -3.01   |        | 13.93    | 9.23     | -1.42   |        | 8.05     | 2.94     | -3.42   |        | 0.12   | 0.04   | -3.93   |        |
| Japan      | (0.55,   | (0.20,   | (-3.30, | <0.001 | (13.44,  | (8.76,   | (-1.45, | <0.001 | (7.68,   | (2.68,   | (-3.74, | <0.001 | (0.08, | (0.02, | (-4.40, | <0.001 |
|            | 0.77)    | 0.36)    | -2.72)  |        | 14.43)   | 9.71)    | -1.38)  |        | 8.43)    | 3.21)    | -3.09)  |        | 0.18)  | 0.09)  | -3.46)  |        |
|            | 1.25     | 0.91     | -1.11   |        | 17.86    | 14.67    | -0.68   |        | 34.77    | 7.42     | -5.05   |        | 0.57   | 0.11   | -5.38   |        |
| Jordan     | (0.51,   | (0.55,   | (-1.40, | <0.001 | (14.66,  | (13.12,  | (-0.78, | <0.001 | (30.25,  | (6.33,   | (-5.83, | <0.001 | (0.13, | (0.02, | (-6.36, | <0.001 |
|            | 2.64)    | 1.41)    | -0.83)  |        | 21.63)   | 16.36)   | -0.57)  |        | 39.85)   | 8.65)    | -4.26)  |        | 1.69)  | 0.37)  | -4.39)  |        |
|            | 8.61     | 3.53     | -3.04   |        | 66.96    | 38.13    | -1.92   |        | 220.04   | 34.84    | -6.14   |        | 3.71   | 0.57   | -6.22   |        |
| Kazakhstan | (7.65,   | (2.94,   | (-3.15, | <0.001 | (64.23,  | (36.12,  | (-2.07, | <0.001 | (215.07, | (32.94,  | (-7.02, | <0.001 | (3.09, | (0.35, | (-7.15, | <0.001 |
|            | 9.67)    | 4.21)    | -2.93)  |        | 69.78)   | 40.23)   | -1.76)  |        | 225.10)  | 36.83)   | -5.26)  |        | 4.42)  | 0.89)  | -5.29)  |        |
|            | 103.62   | 107.08   | 0.11    |        | 1654.30  | 1839.42  | 0.37    |        | 131.52   | 116.57   | -0.41   |        | 0.87   | 0.48   | -2.01   |        |
| Kenya      | (100.70, | (105.19, | (0.10,  | <0.001 | (1641.88 | (1831.32 | (0.33,  | <0.001 | (128.05, | (114.54, | (-0.48, | <0.001 | (0.60, | (0.36, | (-2.19, | <0.001 |
|            | 106.62)  | 109.00)  | 0.12)   |        | '        | '        | 0.41)   |        | 135.07)  | 118.63)  | -0.35)  |        | 1.22)  | 0.63)  | -1.82)  |        |
|            | 49.11    | 51.07    | 0.13    |        | 832.92   | 855.39   | 0.09    |        | 1250.65  | 788.30   | -1.58   |        | 20.63  | 12.67  | -1.67   |        |
| Kiribati   | (20.55,  | (26.96,  | (0.11,  | <0.001 | (694.81, | (744.30, | (0.08,  | <0.001 | (1076.97 | (681.06, | (-1.64, | <0.001 | (4.28, | (2.70, | (-1.73, | <0.001 |
|            | 101.46)  | 88.42)   | 0.15)   |        | 992.22)  | 978.78)  | 0.10)   |        | '        | '        | -1.52)  |        | 62.76) | 37.10) | -1.60)  |        |
|            |          |          |         |        |          |          |         |        | 1445.81) | 907.98)  |         |        |        |        |         |        |

|              |         |         |         |        |          |          |         |        |          |          |         |        |        |        |         |        |
|--------------|---------|---------|---------|--------|----------|----------|---------|--------|----------|----------|---------|--------|--------|--------|---------|--------|
|              | 1.30    | 0.90    | -1.23   |        | 21.58    | 16.78    | -0.86   |        | 37.95    | 5.27     | -6.43   |        | 0.60   | 0.07   | -6.97   |        |
| Kuwait       | (0.39,  | (0.40,  | (-1.53, | <0.001 | (17.02,  | (14.27,  | (-0.95, | <0.001 | (31.83,  | (3.85,   | (-8.42, | <0.001 | (0.08, | (0.00, | (-9.52, | <0.001 |
|              | 3.23)   | 1.90)   | -0.94)  |        | 27.04)   | 19.70)   | -0.77)  |        | 44.95)   | 7.14)    | -4.41)  |        | 2.20)  | 0.81)  | -4.36)  |        |
|              |         |         |         |        | 1144.73  | 1156.90  | 0.03    |        | 485.43   | 135.91   | -4.35   |        | 7.37   | 1.40   | -5.56   |        |
| Kyrgyzstan   | (55.71, | (57.28, | (0.03,  | <0.001 | (1122.61 | (1138.61 | (0.02,  | <0.001 | (470.87, | (129.66, | (-4.86, | <0.001 | (5.67, | (0.83, | (-6.21, | <0.001 |
|              | 65.93)  | 65.88)  | 0.06)   |        | ,        | ,        | 0.04)   |        | 500.35)  | 142.40)  | -3.83)  |        | 9.46)  | 2.22)  | -4.91)  |        |
|              |         |         |         |        | 1028.91  | 1022.51  | -0.03   |        | 413.75   | 248.96   | -1.72   |        | 6.15   | 3.35   | -2.06   |        |
| Lao People's | 70.12   | 66.25   | -0.20   |        | (1006.39 | (1006.66 | (-0.08, | 0.391  | (399.29, | (241.14, | (-1.94, | <0.001 | (4.48, | (2.49, | (-2.27, | <0.001 |
| Democratic   | (64.49, | (62.29, | (-0.30, | <0.001 | ,        | ,        | 0.03)   |        | 428.64)  | 256.98)  | -1.51)  |        | 8.27)  | 4.41)  | -1.84)  |        |
| Republic     | 76.15)  | 70.40)  | -0.10)  |        | 1051.85) | 1038.56) |         |        |          |          |         |        |        |        |         |        |
|              |         |         |         |        | 40.36    | 27.96    | -1.30   |        | 74.27    | 14.20    | -5.38   |        | 1.27   | 0.23   | -6.02   |        |
| Latvia       | (3.77,  | (1.38,  | (-2.43, | <0.001 | (34.96,  | (22.19,  | (-1.68, | <0.001 | (66.90,  | (10.29,  | (-7.42, | <0.001 | (0.48, | (0.00, | (-7.37, | <0.001 |
|              | 8.20)   | 5.93)   | -2.04)  |        | 46.41)   | 34.98)   | -0.93)  |        | 82.30)   | 19.35)   | -3.28)  |        | 2.80)  | 2.22)  | -4.64)  |        |
|              |         |         |         |        | 22.95    | 16.54    | -1.12   |        | 62.67    | 13.14    | -5.25   |        | 1.03   | 0.20   | -5.51   |        |
| Lebanon      | (0.74,  | (0.47,  | (-1.80, | <0.001 | (19.23,  | (14.12,  | (-1.22, | <0.001 | (56.42,  | (10.99,  | (-5.37, | <0.001 | (0.38, | (0.03, | (-5.67, | <0.001 |
|              | 3.04)   | 1.87)   | -1.47)  |        | 27.21)   | 19.30)   | -1.03)  |        | 69.44)   | 15.63)   | -5.13)  |        | 2.28)  | 0.82)  | -5.35)  |        |
|              |         |         |         |        | 1701.86  | 1709.86  | 0.02    |        | 200.58   | 167.58   | -0.68   |        | 1.99   | 1.45   | -1.10   |        |
| Lesotho      | (99.52, | (98.98, | (-0.07, | <0.001 | (1658.33 | (1672.42 | (-0.00, | 0.098  | (185.69, | (155.96, | (-0.89, | <0.001 | (0.76, | (0.56, | (-1.67, | <0.001 |
|              | 121.43) | 117.94) | -0.05)  |        | ,        | ,        | 0.04)   |        | 216.45)  | 179.88)  | -0.47)  |        | 4.40)  | 3.11)  | -0.54)  |        |
|              |         |         |         |        | 1229.92  | 1335.82  | 0.28    |        | 161.52   | 98.49    | -1.68   |        | 1.68   | 0.57   | -3.63   |        |
| Liberia      | (70.17, | (80.61, | (0.26,  | <0.001 | (1193.57 | (1313.16 | (0.27,  | <0.001 | (148.55, | (92.43,  | (-1.84, | <0.001 | (0.61, | (0.20, | (-3.95, | <0.001 |
|              | 88.67)  | 92.03)  | 0.32)   |        | ,        | ,        | 0.29)   |        | 175.36)  | 104.85)  | -1.51)  |        | 3.73)  | 1.30)  | -3.31)  |        |
|              |         |         |         |        | 1267.12) | 1358.77) |         |        |          |          |         |        |        |        |         |        |
|              |         |         |         |        | 711.62   | 799.31   | 0.41    |        | 116.96   | 62.14    | -2.12   |        | 1.38   | 0.40   | -4.07   |        |
| Libya        | (33.47, | (39.60, | (0.44,  | <0.001 | (691.61, | (784.90, | (0.39,  | <0.001 | (108.94, | (58.17,  | (-2.52, | <0.001 | (0.63, | (0.15, | (-4.74, | <0.001 |
|              | 42.51)  | 46.49)  | 0.46)   |        | 732.12)  | 813.92)  | 0.42)   |        | 125.47)  | 66.32)   | -1.72)  |        | 2.71)  | 0.89)  | -3.39)  |        |
|              |         |         |         |        | 34.90    | 24.45    | -1.29   |        | 65.53    | 13.63    | -5.49   |        | 1.13   | 0.22   | -5.60   |        |
| Lithuania    | (3.62,  | (1.42,  | (-2.62, | <0.001 | (30.66,  | (19.98,  | (-1.51, | <0.001 | (59.70,  | (10.41,  | (-7.17, | <0.001 | (0.49, | (0.01, | (-7.45, | <0.001 |
|              | 7.14)   | 4.93)   | -1.83)  |        | 39.57)   | 29.74)   | -1.07)  |        | 71.79)   | 17.66)   | -3.77)  |        | 2.26)  | 1.55)  | -3.70)  |        |
|              |         |         |         |        | 11.03    | 10.90    | -0.06   |        | 7.70     | 3.46     | -2.65   |        | 0.12   | 0.05   | -3.05   |        |
| Luxembourg   | (0.00,  | (0.00,  | (-0.72, | <0.001 | (4.74,   | (5.52,   | (-0.12, | 0.043  | (2.75,   | (0.89,   | (-3.04, | <0.001 | (0.00, | (0.00, | (-3.93, | <0.001 |

|                  |          |          |         |        |          |          |         |        |          |          |         |        |        |        |         |        |
|------------------|----------|----------|---------|--------|----------|----------|---------|--------|----------|----------|---------|--------|--------|--------|---------|--------|
|                  | 8.44)    | 5.76)    | -0.29)  |        | 23.05)   | 20.00)   | -0.00)  |        | 18.47)   | 10.08)   | -2.27)  |        | 7.70)  | 5.02)  | -2.17)  |        |
|                  |          |          |         |        | 1868.48  | 2012.26  |         |        | 383.78   | 221.04   | -1.87   |        | 4.77   | 2.04   | -2.84   |        |
| Madagascar       | (103.63, | (114.83, | (0.27,  | <0.001 | (1850.45 | (2000.25 | (0.25,  | <0.001 | (375.71, | (217.08, | (-2.12, | <0.001 | (3.90, | (1.68, | (-3.22, | <0.001 |
|                  | 112.02)  | 120.47)  | 0.33)   |        | ,        | ,        | 0.27)   |        | 392.00)  | 225.06)  | -1.61)  |        | 5.80)  | 2.47)  | -2.47)  |        |
|                  |          |          |         |        | 1886.65) | 2024.33) |         |        |          |          |         |        |        |        |         |        |
|                  |          |          |         |        | 2042.47  | 2150.65  |         |        | 216.59   | 141.27   | -1.44   |        | 1.95   | 0.64   | -3.73   |        |
| Malawi           | (123.06, | (130.47, | (0.13,  | <0.001 | (2021.58 | (2135.93 | (0.17,  | <0.001 | (209.85, | (137.53, | (-1.53, | <0.001 | (1.36, | (0.41, | (-4.05, | <0.001 |
|                  | 133.22)  | 137.54)  | 0.17)   |        | ,        | ,        | 0.19)   |        | 223.51)  | 145.09)  | -1.35)  |        | 2.75)  | 0.96)  | -3.41)  |        |
|                  |          |          |         |        | 2063.55) | 2165.45) |         |        |          |          |         |        |        |        |         |        |
|                  |          |          |         |        | 883.61   | 903.66   | 0.08    |        | 175.68   | 65.66    | -3.34   |        | 2.23   | 0.38   | -5.92   |        |
| Malaysia         | (41.33,  | (40.61,  | (-0.11, | <0.001 | (874.00, | (896.39, | (0.07,  | <0.001 | (171.40, | (63.71,  | (-3.56, | <0.001 | (1.76, | (0.24, | (-6.22, | <0.001 |
|                  | 45.58)   | 43.79)   | -0.09)  |        | 893.31)  | 910.97)  | 0.09)   |        | 180.05)  | 67.66)   | -3.13)  |        | 2.77)  | 0.56)  | -5.63)  |        |
|                  |          |          |         |        | 854.44   | 852.99   | -0.01   |        | 302.59   | 66.68    | -5.05   |        | 4.37   | 0.43   | -7.66   |        |
| Maldives         | (28.39,  | (31.38,  | (-0.21, | <0.001 | (762.45, | (792.74, | (-0.03, | 0.272  | (248.14, | (50.68,  | (-5.19, | <0.001 | (0.31, | (0.00, | (-8.01, | <0.001 |
|                  | 76.31)   | 62.37)   | -0.16)  |        | 956.16)  | 917.06)  | 0.01)   |        | 367.16)  | 86.70)   | -4.90)  |        | 22.26) | 6.49)  | -7.29)  |        |
|                  |          |          |         |        | 1414.64  | 1439.27  |         |        | 292.85   | 139.49   | -2.51   |        | 3.69   | 1.16   | -3.90   |        |
| Mali             | (86.30,  | (88.50,  | (-0.00, | 0.059  | (1395.95 | (1427.55 | (0.01,  | 0.018  | (284.40, | (135.87, | (-2.72, | <0.001 | (2.79, | (0.85, | (-4.17, | <0.001 |
|                  | 95.65)   | 94.21)   | 0.05)   |        | ,        | ,        | 0.12)   |        | 301.49)  | 143.18)  | -2.31)  |        | 4.80)  | 1.56)  | -3.63)  |        |
|                  |          |          |         |        | 1433.55) | 1451.06) |         |        |          |          |         |        |        |        |         |        |
|                  |          |          |         |        | 5.25     | 4.97     | -0.20   |        | 8.24     | 4.87     | -1.70   |        | 0.13   | 0.08   | -1.71   |        |
| Malta            | (0.00,   | (0.00,   | (-0.70, | <0.001 | (1.29,   | (1.12,   | (-0.25, | <0.001 | (2.94,   | (1.11,   | (-2.03, | <0.001 | (0.00, | (0.00, | (-2.35, | <0.001 |
|                  | 7.06)    | 8.42)    | -0.39)  |        | 14.78)   | 15.43)   | -0.16)  |        | 18.87)   | 15.21)   | -1.36)  |        | 6.74)  | 8.10)  | -1.07)  |        |
|                  |          |          |         |        | 859.84   | 879.37   | 0.08    |        | 727.49   | 710.05   | -0.07   |        | 11.64  | 11.24  | -0.11   |        |
| Marshall Islands | (12.34,  | (16.47,  | (0.05,  | <0.001 | (670.99, | (716.52, | (0.04,  | <0.001 | (550.17, | (564.21, | (-0.14, | 0.024  | (0.20, | (0.57, | (-0.19, | 0.003  |
|                  | 128.81)  | 107.80)  | 0.07)   |        | 1089.46) | 1068.64) | 0.11)   |        | 947.05)  | 882.50)  | -0.01)  |        | 77.24) | 53.85) | -0.04)  |        |
|                  |          |          |         |        | 1267.22  | 1293.61  |         |        | 150.72   | 79.85    | -2.17   |        | 1.46   | 0.30   | -5.31   |        |
| Mauritania       | (66.07,  | (69.42,  | (0.03,  | <0.001 | (1231.80 | (1268.85 | (0.03,  | <0.001 | (138.76, | (73.81,  | (-2.27, | <0.001 | (0.51, | (0.05, | (-5.48, | <0.001 |
|                  | 83.19)   | 81.20)   | 0.05)   |        | ,        | ,        | 0.08)   |        | 163.51)  | 86.29)   | -2.08)  |        | 3.38)  | 1.05)  | -5.15)  |        |
|                  |          |          |         |        | 1303.47) | 1318.77) |         |        |          |          |         |        |        |        |         |        |
|                  |          |          |         |        | 869.62   | 872.35   | 0.01    |        | 208.37   | 75.90    | -3.45   |        | 2.76   | 0.57   | -5.32   |        |
| Mauritius        | (35.80,  | (34.13,  | (-0.15, | <0.001 | (833.11, | (834.76, | (-0.00, | 0.146  | (190.65, | (65.11,  | (-4.28, | <0.001 | (1.08, | (0.03, | (-6.67, | <0.001 |
|                  | 52.85)   | 51.53)   | -0.10)  |        | 907.34)  | 911.25)  | 0.03)   |        | 227.32)  | 88.02)   | -2.61)  |        | 5.82)  | 2.75)  | -3.95)  |        |
|                  |          |          |         |        | 640.17   | 558.58   | -0.47   | <0.001 | 119.42   | 36.47    | -3.95   | <0.001 | 1.54   | 0.17   | -7.18   |        |
| Mexico           | 33.45    | 28.88    | -0.50   | <0.001 |          |          |         |        |          |          |         |        |        |        |         |        |

|                   |          |          |         |        |          |          |         |        |          |          |         |        |         |         |         |        |
|-------------------|----------|----------|---------|--------|----------|----------|---------|--------|----------|----------|---------|--------|---------|---------|---------|--------|
|                   | (32.63,  | (28.22,  | (-0.56, |        | (636.42, | (555.68, | (-0.49, |        | (117.75, | (35.73,  | (-4.11, | (1.36, | (0.12,  | (-7.69, |         |        |
|                   | 34.29)   | 29.55)   | -0.44)  |        | 643.94)  | 561.48)  | -0.44)  |        | 121.11)  | 37.21)   | -3.79)  | 1.75)  | 0.23)   | -6.68)  |         |        |
| Micronesia        | 46.48    | 46.92    | 0.05    |        | 852.67   | 867.36   | 0.06    |        | 851.24   | 600.77   | -1.20   | 13.77  | 9.40    | -1.31   |         |        |
| (Federated States | (21.16,  | (21.97,  | (-0.01, | 0.129  | (726.71, | (743.46, | (0.05,  | <0.001 | (722.11, | (496.63, | (-1.25, | <0.001 | (2.23,  | (0.95,  | (-1.37, | <0.001 |
| of)               | 91.06)   | 89.35)   | 0.10)   |        | 995.84)  | 1007.10) | 0.08)   |        | 998.12)  | 721.20)  | -1.15)  |        | 47.01)  | 37.82)  | -1.25)  |        |
|                   | 0.37     | 0.35     | -0.14   |        | 7.42     | 7.30     | -0.05   |        | 3.74     | 2.75     | -1.04   |        | 0.06    | 0.04    | -1.44   |        |
| Monaco            | (0.00,   | (0.00,   | (-0.35, | 0.220  | (0.00,   | (0.00,   | (-0.08, | 0.005  | (0.00,   | (0.00,   | (-1.14, | <0.001 | (0.00,  | (0.00,  | (-2.03, | <0.001 |
|                   | 126.47)  | 91.77)   | 0.08)   |        | 137.30)  | 104.46)  | -0.01)  |        | 131.55)  | 96.22)   | -0.95)  |        | 126.00) | 91.20)  | -0.86)  |        |
|                   |          |          |         |        | 1227.00  | 1208.18  |         |        |          |          |         |        |         |         |         |        |
|                   | 70.84    | 66.88    | -0.20   |        | (1193.58 | (1181.81 | -0.05   |        | 251.23   | 120.83   | -2.51   |        | 3.37    | 1.10    | -3.85   |        |
| Mongolia          | (63.29,  | (60.55,  | (-0.20, | <0.001 | '        | '        | (-0.06, | <0.001 | (235.51, | (112.74, | (-2.92, | <0.001 | (1.75,  | (0.47,  | (-4.45, | <0.001 |
|                   | 79.20)   | 73.74)   | -0.19)  |        | 1261.23) | 1235.04) | -0.05)  |        | 267.82)  | 129.41)  | -2.11)  |        | 5.99)   | 2.30)   | -3.25)  |        |
|                   | 1.06     | 0.97     | -0.27   |        | 8.46     | 8.56     | 0.07    |        | 22.40    | 12.31    | -1.83   |        | 0.38    | 0.21    | -1.89   |        |
| Montenegro        | (0.06,   | (0.03,   | (-0.37, | <0.001 | (4.12,   | (3.95,   | (0.03,  | 0.001  | (14.82,  | (6.64,   | (-2.83, | <0.001 | (0.00,  | (0.00,  | (-2.92, | <0.001 |
|                   | 5.05)    | 5.76)    | -0.16)  |        | 15.47)   | 16.49)   | 0.10)   |        | 32.54)   | 21.20)   | -0.83)  |        | 3.88)   | 4.50)   | -0.85)  |        |
|                   | 50.19    | 49.46    | -0.05   |        | 784.96   | 800.13   | 0.07    |        | 161.91   | 74.17    | -2.65   |        | 2.08    | 0.61    | -4.13   |        |
| Morocco           | (48.30,  | (47.85,  | (-0.07, | <0.001 | (777.25, | (793.66, | (0.03,  | 0.001  | (158.40, | (72.21,  | (-2.76, | <0.001 | (1.69,  | (0.45,  | (-4.35, | <0.001 |
|                   | 52.13)   | 51.11)   | -0.04)  |        | 792.73)  | 806.64)  | 0.12)   |        | 165.47)  | 76.17)   | -2.53)  |        | 2.52)   | 0.82)   | -3.92)  |        |
|                   |          |          |         |        | 2051.38  | 2135.57  |         |        |          |          |         |        |         |         |         |        |
|                   | 128.48   | 130.28   | 0.04    |        | (2033.50 | (2123.58 | 0.14    |        | 164.13   | 135.26   | -0.68   |        | 1.11    | 0.57    | -2.30   |        |
| Mozambique        | (124.17, | (127.47, | (-0.01, | 0.115  | '        | '        | (0.13,  | <0.001 | (159.10, | (132.26, | (-0.73, | <0.001 | (0.73,  | (0.39,  | (-2.54, | <0.001 |
|                   | 132.90)  | 133.15)  | 0.09)   |        | 2069.39) | 2147.62) | 0.16)   |        | 169.29)  | 138.32)  | -0.62)  |        | 1.62)   | 0.81)   | -2.06)  |        |
|                   |          |          |         |        | 1177.06  | 1042.61  |         |        |          |          |         |        |         |         |         |        |
|                   | 82.27    | 66.62    | -0.75   |        | (1169.70 | (1036.68 | -0.43   |        | 214.77   | 89.25    | -3.01   |        | 2.64    | 0.66    | -4.72   |        |
| Myanmar           | (80.38,  | (65.13,  | (-0.83, | <0.001 | '        | '        | (-0.50, | <0.001 | (211.62, | (87.52,  | (-3.15, | <0.001 | (2.30,  | (0.52,  | (-5.01, | <0.001 |
|                   | 84.20)   | 68.14)   | -0.68)  |        | 1184.45) | 1048.56) | -0.36)  |        | 217.95)  | 91.00)   | -2.87)  |        | 3.02)   | 0.83)   | -4.43)  |        |
|                   |          |          |         |        | 1672.11  | 1670.69  |         |        |          |          |         |        |         |         |         |        |
|                   | 94.52    | 93.39    | -0.05   |        | (1624.01 | (1635.69 | -0.01   |        | 206.72   | 112.03   | -2.12   |        | 2.14    | 0.55    | -4.60   |        |
| Namibia           | (83.79,  | (85.35,  | (-0.06, | <0.001 | '        | '        | (-0.01, | 0.077  | (189.79, | (103.09, | (-2.37, | <0.001 | (0.74,  | (0.10,  | (-5.17, | <0.001 |
|                   | 106.43)  | 102.01)  | -0.03)  |        | 1721.41) | 1706.29) | 0.00)   |        | 224.89)  | 121.57)  | -1.87)  |        | 5.05)   | 1.72)   | -4.02)  |        |
|                   |          |          |         |        |          |          |         |        |          |          |         |        |         |         |         |        |
|                   | 18.89    | 14.55    | -0.92   |        | 164.39   | 149.36   | -0.37   |        | 616.30   | 510.63   | -0.66   |        | 10.26   | 8.42    | -0.69   |        |
| Nauru             | (0.00,   | (0.00,   | (-1.03, | <0.001 | (36.57,  | (34.03,  | (-0.47, | <0.001 | (319.20, | (257.30, | (-0.90, | <0.001 | (0.00,  | (0.00,  | (-0.95, | <0.001 |
|                   | 243.35)  | 213.71)  | -0.81)  |        | 475.57)  | 428.38)  | -0.26)  |        | 1083.17) | 916.14)  | -0.42)  |        | 226.93) | 202.00) | -0.44)  |        |

|                          |         |         |         |        |           |           |         |        |          |          |         |        |         |         |          |        |
|--------------------------|---------|---------|---------|--------|-----------|-----------|---------|--------|----------|----------|---------|--------|---------|---------|----------|--------|
|                          | 73.70   | 70.68   | -0.14   |        | 874.75    | 902.65    | 0.11    |        | 524.25   | 196.03   | -3.34   |        | 8.27    | 2.65    | -3.85    |        |
| Nepal                    | (71.01, | (68.76, | (-0.16, | <0.001 | (865.07,  | (895.60,  | (0.09,  | <0.001 | (516.66, | (192.70, | (-3.53, | <0.001 | (7.33,  | (2.28,  | (-4.15,  | <0.001 |
|                          | 76.46)  | 72.64)  | -0.12)  |        | 884.51)   | 909.75)   | 0.13)   |        | 531.92)  | 199.39)  | -3.15)  |        | 9.30)   | 3.08)   | -3.56)   |        |
|                          | 0.36    | 0.35    | -0.08   |        | 6.97      | 7.18      | 0.11    |        | 4.26     | 2.34     | -2.04   |        | 0.07    | 0.03    | -2.97    |        |
| Netherlands              | (0.18,  | (0.17,  | (-0.20, | 0.193  | (6.05,    | (6.19,    | (0.08,  | <0.001 | (3.56,   | (1.80,   | (-2.48, | <0.001 | (0.01,  | (0.00,  | (-5.18,  | 0.010  |
|                          | 0.66)   | 0.67)   | 0.04)   |        | 7.99)     | 8.29)     | 0.14)   |        | 5.07)    | 3.01)    | -1.59)  |        | 0.26)   | 0.22)   | -0.71)   |        |
|                          | 2.38    | 1.15    | -2.52   |        | 36.65     | 29.93     | -0.70   |        | 68.14    | 27.23    | -2.95   |        | 1.12    | 0.44    | -3.01    |        |
| New Zealand              | (1.37,  | (0.51,  | (-2.62, | <0.001 | (32.29,   | (26.06,   | (-0.84, | <0.001 | (62.16,  | (23.59,  | (-3.99, | <0.001 | (0.48,  | (0.10,  | (-3.97,  | <0.001 |
|                          | 3.84)   | 2.26)   | -2.41)  |        | 41.45)    | 34.24)    | -0.57)  |        | 74.55)   | 31.30)   | -1.89)  |        | 2.24)   | 1.28)   | -2.05)   |        |
|                          | 75.68   | 75.73   | -0.01   |        | 1465.42   | 1495.90   | 0.08    |        | 151.62   | 85.21    | -1.99   |        | 1.37    | 0.23    | -6.16    |        |
| Nicaragua                | (69.77, | (71.26, | (-0.08, | 0.864  | (1437.60, | (1475.69, | (0.06,  | <0.001 | (142.71, | (80.44,  | (-2.38, | <0.001 | (0.64,  | (0.05,  | (-7.14,  | <0.001 |
|                          | 82.03)  | 80.41)  | 0.07)   |        | ,         | ,         | 0.10)   |        | 161.00)  | 90.19)   | -1.60)  |        | 2.64)   | 0.67)   | -5.16)   |        |
|                          | 77.22   | 81.55   | 0.19    |        | 1186.05   | 1260.28   | 0.21    |        | 189.16   | 114.89   | -1.70   |        | 2.16    | 0.89    | -2.96    |        |
| Niger                    | (72.81, | (78.83, | (0.17,  | <0.001 | (1167.92, | (1248.97, | (0.20,  | <0.001 | (182.03, | (111.53, | (-1.86, | <0.001 | (1.45,  | (0.62,  | (-3.39,  | <0.001 |
|                          | 81.86)  | 84.36)  | 0.21)   |        | ,         | ,         | 0.23)   |        | 196.53)  | 118.34)  | -1.54)  |        | 3.13)   | 1.26)   | -2.54)   |        |
|                          | 75.78   | 80.61   | 0.22    |        | 1270.75   | 1383.96   | 0.30    |        | 154.69   | 89.03    | -1.89   |        | 1.54    | 0.38    | -4.70    |        |
| Nigeria                  | (74.50, | (79.79, | (0.20,  | <0.001 | (1265.26, | (1380.42, | (0.28,  | <0.001 | (152.79, | (88.14,  | (-1.99, | <0.001 | (1.35,  | (0.33,  | (-5.00,  | <0.001 |
|                          | 77.08)  | 81.44)  | 0.23)   |        | ,         | ,         | 0.31)   |        | 156.61)  | 89.93)   | -1.79)  |        | 1.74)   | 0.45)   | -4.41)   |        |
|                          | 9.79    | 7.37    | -0.98   |        | 109.53    | 109.13    | -0.02   |        | 299.20   | 179.47   | -1.73   |        | 4.94    | 2.88    | -1.83    |        |
| Niue                     | (0.00,  | (0.00,  | (-1.01, | <0.001 | (0.02,    | (0.00,    | (-0.05, | 0.204  | (10.48,  | (0.14,   | (-1.98, | <0.001 | (0.00,  | (0.00,  | (-2.09,  | <0.001 |
|                          | 1059.76 | 1476.12 | -0.95)  |        | 1251.11)  | 1671.08)  | 0.01)   |        | 1585.56) | 1801.76) | -1.48)  |        | 1049.80 | 1467.23 | -1.57)   |        |
|                          | )       | )       |         |        | )         | )         |         |        | )        | )        |         |        | )       | )       |          |        |
|                          | 1.80    | 0.94    | -2.17   |        | 12.98     | 8.21      | -1.57   |        | 67.85    | 12.19    | -5.75   |        | 1.18    | 0.21    | -5.86    |        |
| North Macedonia          | (0.74,  | (0.25,  | (-2.42, | <0.001 | (9.69,    | (5.61,    | (-1.71, | <0.001 | (60.03,  | (9.03,   | (-6.28, | <0.001 | (0.37,  | (0.00,  | (-6.50,  | <0.001 |
|                          | 3.70)   | 2.74)   | -1.91)  |        | 17.04)    | 11.77)    | -1.43)  |        | 76.43)   | 16.27)   | -5.22)  |        | 2.84)   | 1.69)   | -5.22)   |        |
|                          | 35.12   | 37.48   | 0.23    |        | 891.85    | 936.53    | 0.17    |        | 264.62   | 159.95   | -1.71   |        | 3.76    | 1.94    | -2.14    |        |
| Northern Mariana Islands | (9.69,  | (5.28,  | (0.20,  | <0.001 | (728.39,  | (702.55,  | (0.15,  | <0.001 | (179.73, | (70.16,  | (-1.96, | <0.001 | (0.00,  | (0.00,  | (-2.44,  | <0.001 |
|                          | 92.29)  | 153.72) | 0.25)   |        | 1082.79)  | 1236.01)  | 0.19)   |        | 377.80)  | 325.81)  | -1.45)  |        | 43.78)  | 102.04) | -1.85)   |        |
|                          | 0.23    | 0.21    | -0.14   |        | 4.23      | 4.36      | 0.11    |        | 4.51     | 1.11     | -4.76   |        | 0.07    | 0.01    | -7.15    |        |
| Norway                   | (0.02,  | (0.02,  | (-0.51, | 0.477  | (2.91,    | (3.08,    | (0.08,  | <0.001 | (3.15,   | (0.53,   | (-5.17, | <0.001 | (0.00,  | (0.00,  | (-10.41, | <0.001 |

|                  |         |          |         |        |           |           |         |        |          |          |         |        |         |         |         |        |
|------------------|---------|----------|---------|--------|-----------|-----------|---------|--------|----------|----------|---------|--------|---------|---------|---------|--------|
|                  | 0.91)   | 0.87)    | 0.24)   |        | 5.95)     | 6.04)     | 0.13)   |        | 6.27)    | 2.11)    | -4.35)  | 0.66)  | 0.55)   | -3.78)  |         |        |
|                  | 1.01    | 1.04     | 0.19    |        | 16.30     | 17.43     | 0.26    |        | 23.79    | 5.46     | -4.94   | 0.39   | 0.08    | -5.22   |         |        |
| Oman             | (0.19,  | (0.46,   | (0.04,  | 0.011  | (11.89,   | (14.62,   | (0.16,  | <0.001 | (18.39,  | (3.95,   | (-5.43, | <0.001 | (0.01,  | (0.00,  | (-5.56, | <0.001 |
|                  | 3.23)   | 2.12)    | 0.34)   |        | 21.90)    | 20.67)    | 0.36)   |        | 30.36)   | 7.42)    | -4.45)  |        | 2.25)   | 0.76)   | -4.87)  |        |
|                  | 100.41  | 105.96   | 0.21    |        | 1314.41   | 1402.41   | 0.25    |        | 610.89   | 484.71   | -0.79   |        | 9.35    | 7.09    | -0.94   |        |
| Pakistan         | (99.02, | (105.02, | (0.02,  | 0.029  | (1309.10, | (1398.87, | (0.12,  | <0.001 | (607.21, | (482.61, | (-0.92, | <0.001 | (8.89,  | (6.83,  | (-1.10, | <0.001 |
|                  | 101.82) | 106.90)  | 0.40)   |        | ,         | ,         | 0.39)   |        | 614.59)  | 486.82)  | -0.66)  |        | 9.82)   | 7.35)   | -0.79)  |        |
|                  | 7.38    | 5.94     | -0.73   |        | 86.90     | 85.47     | -0.05   |        | 213.23   | 130.20   | -1.68   |        | 3.51    | 2.11    | -1.74   |        |
| Palau            | (0.00,  | (0.00,   | (-0.75, | <0.001 | (17.01,   | (11.67,   | (-0.08, | 0.005  | (86.06,  | (29.52,  | (-1.82, | <0.001 | (0.00,  | (0.00,  | (-1.88, | <0.001 |
|                  | 135.20) | 181.09)  | -0.70)  |        | 265.23)   | 311.87)   | -0.02)  |        | 442.87)  | 378.89)  | -1.54)  |        | 127.69) | 174.13) | -1.59)  |        |
|                  | 42.11   | 41.22    | -0.07   |        | 779.88    | 793.18    | 0.06    |        | 70.80    | 45.85    | -1.50   |        | 0.57    | 0.14    | -4.69   |        |
| Palestine        | (35.79, | (37.41,  | (-0.08, | <0.001 | (750.32,  | (775.64,  | (0.06,  | <0.001 | (62.01,  | (41.70,  | (-1.66, | <0.001 | (0.06,  | (0.01,  | (-5.20, | <0.001 |
|                  | 49.42)  | 45.35)   | -0.07)  |        | 810.44)   | 811.04)   | 0.06)   |        | 80.62)   | 50.33)   | -1.33)  |        | 2.45)   | 0.71)   | -4.18)  |        |
|                  | 69.13   | 64.20    | -0.25   |        | 1382.29   | 1349.77   | -0.08   |        | 188.20   | 92.26    | -2.39   |        | 2.06    | 0.47    | -4.85   |        |
| Panama           | (62.16, | (58.73,  | (-0.28, | <0.001 | (1349.54, | (1324.22, | (-0.09, | <0.001 | (176.17, | (85.66,  | (-3.00, | <0.001 | (0.98,  | (0.12,  | (-6.53, | <0.001 |
|                  | 76.72)  | 70.04)   | -0.21)  |        | ,         | ,         | -0.07)  |        | 200.88)  | 99.23)   | -1.78)  |        | 3.88)   | 1.26)   | -3.14)  |        |
|                  | 46.59   | 47.76    | 0.10    |        | 810.80    | 844.99    | 0.15    |        | 680.11   | 635.56   | -0.28   |        | 10.83   | 10.01   | -0.32   |        |
| Papua New Guinea | (41.94, | (44.78,  | (0.07,  | <0.001 | (790.96,  | (832.28,  | (0.13,  | <0.001 | (661.53, | (624.47, | (-0.55, | 0.046  | (8.58,  | (8.65,  | (-0.60, | 0.028  |
|                  | 51.66)  | 50.90)   | 0.12)   |        | 831.05)   | 857.85)   | 0.16)   |        | 699.12)  | 646.81)  | -0.01)  |        | 13.53)  | 11.52)  | -0.03)  |        |
|                  | 71.21   | 68.93    | -0.11   |        | 1416.56   | 1416.99   | 0.01    |        | 119.22   | 87.98    | -1.01   |        | 0.88    | 0.36    | -2.96   |        |
| Paraguay         | (65.50, | (64.75,  | (-0.12, | <0.001 | (1389.93, | (1397.71, | (-0.00, | 0.202  | (111.54, | (83.22,  | (-1.31, | <0.001 | (0.34,  | (0.12,  | (-3.65, | <0.001 |
|                  | 77.32)  | 73.32)   | -0.09)  |        | ,         | ,         | 0.01)   |        | 127.31)  | 92.94)   | -0.72)  |        | 1.91)   | 0.83)   | -2.27)  |        |
|                  | 67.29   | 67.16    | -0.01   |        | 1257.68   | 1299.59   | 0.11    |        | 110.96   | 74.13    | -1.38   |        | 0.87    | 0.21    | -4.71   |        |
| Peru             | (64.95, | (65.20,  | (-0.04, | 0.455  | (1247.16, | (1291.01, | (0.09,  | <0.001 | (107.83, | (72.09,  | (-1.77, | <0.001 | (0.61,  | (0.11,  | (-6.34, | <0.001 |
|                  | 69.69)  | 69.16)   | 0.02)   |        | ,         | ,         | 0.13)   |        | 114.17)  | 76.21)   | -0.99)  |        | 1.21)   | 0.35)   | -3.06)  |        |
|                  | 40.34   | 39.54    | -0.08   |        | 619.92    | 683.36    | 0.33    |        | 112.25   | 200.32   | 2.13    |        | 1.38    | 2.77    | 2.59    |        |
| Philippines      | (39.26, | (38.73,  | (-0.09, | <0.001 | (615.54,  | (679.93,  | (0.19,  | <0.001 | (110.38, | (198.47, | (1.49,  | <0.001 | (1.18,  | (2.56,  | (1.72,  | <0.001 |
|                  | 41.44)  | 40.37)   | -0.06)  |        | 624.32)   | 686.79)   | 0.47)   |        | 114.14)  | 202.19)  | 2.78)   |        | 1.61)   | 3.00)   | 3.47)   |        |
| Poland           | 2.13    | 1.23     | -1.84   | <0.001 | 15.91     | 12.64     | -0.80   | <0.001 | 61.79    | 6.60     | -7.62   | <0.001 | 1.08    | 0.10    | -8.04   | <0.001 |

|                       |                  |                  |                |        |                    |                    |                |        |                  |                  |                |        |              |              |                |
|-----------------------|------------------|------------------|----------------|--------|--------------------|--------------------|----------------|--------|------------------|------------------|----------------|--------|--------------|--------------|----------------|
|                       | (1.82, 2.48)     | (0.99, 1.53)     | (-2.09, -1.59) |        | (15.02, 16.85)     | (11.78, 13.55)     | (-0.91, -0.68) |        | (60.06, 63.57)   | (5.98, 7.26)     | (-8.11, -7.13) |        | (0.86, 1.34) | (0.04, 0.23) | (-8.61, -7.47) |
|                       | 1.19             | 0.42             | -3.60          |        | 12.82              | 7.44               | -1.88          |        | 46.74            | 8.17             | -5.74          |        | 0.79         | 0.13         | -6.57          |
| Portugal              | (0.75, 1.79)     | (0.17, 0.91)     | (-3.85, -3.35) | <0.001 | (11.26, 14.53)     | (6.14, 8.95)       | (-1.97, -1.79) | <0.001 | (43.71, 49.92)   | (6.83, 9.72)     | (-6.97, -4.50) | <0.001 | (0.44, 1.30) | (0.02, 0.50) | (-6.77, -6.36) |
|                       | 1.19             | 0.95             | -0.75          |        | 22.06              | 19.81              | -0.37          |        | 27.97            | 7.96             | -4.73          |        | 0.45         | 0.12         | -4.99          |
| Puerto Rico           | (0.54, 2.30)     | (0.33, 2.17)     | (-0.88, -0.61) | <0.001 | (18.78, 25.75)     | (16.35, 23.81)     | (-0.41, -0.32) | <0.001 | (24.26, 32.09)   | (5.84, 10.62)    | (-5.31, -4.15) | <0.001 | (0.10, 1.27) | (0.00, 0.92) | (-5.76, -4.21) |
|                       | 1.53             | 0.94             | -1.68          |        | 21.62              | 16.86              | -0.85          |        | 30.81            | 5.93             | -5.36          |        | 0.50         | 0.08         | -6.00          |
| Qatar                 | (0.05, 9.56)     | (0.21, 3.21)     | (-1.91, -1.45) | <0.001 | (11.95, 36.66)     | (12.73, 22.19)     | (-0.93, -0.76) | <0.001 | (19.04, 47.81)   | (3.66, 9.46)     | (-7.37, -3.30) | <0.001 | (0.00, 7.89) | (0.00, 2.02) | (-7.30, -4.68) |
|                       | 0.51             | 0.36             | -1.25          |        | 10.79              | 9.41               | -0.49          |        | 17.06            | 3.13             | -5.76          |        | 0.27         | 0.04         | -6.38          |
| Republic of Korea     | (0.38, 0.67)     | (0.24, 0.52)     | (-1.44, -1.05) | <0.001 | (10.16, 11.45)     | (8.76, 10.11)      | (-0.54, -0.44) | <0.001 | (16.26, 17.88)   | (2.75, 3.54)     | (-6.43, -5.08) | <0.001 | (0.18, 0.40) | (0.01, 0.13) | (-6.73, -6.02) |
| Republic of Moldova   | (8.71, 6.96)     | (2.62, 1.59)     | (-4.07, -4.14) | <0.001 | (57.54, 52.78)     | (23.98, 20.42)     | (-2.98, -3.02) | <0.001 | (164.51, 156.35) | (25.16, 21.52)   | (-6.63, -7.81) | <0.001 | (2.82, 1.85) | (0.41, 0.08) | (-6.82, -8.01) |
|                       | 10.82)           | 4.22)            | -3.99)         |        | 62.63)             | 28.09)             | -2.93)         |        | 173.02)          | 29.33)           | -5.44)         |        | 4.16)        | 1.45)        | -5.62)         |
| Romania               | (3.26, 2.75)     | (1.24, 0.87)     | (-3.26, -3.45) | <0.001 | (21.45, 20.09)     | (11.98, 10.74)     | (-2.06, -2.31) | <0.001 | (111.20, 108.08) | (12.57, 11.29)   | (-7.15, -7.73) | <0.001 | (1.94, 1.55) | (0.20, 0.07) | (-7.55, -8.24) |
|                       | 3.85)            | 1.71)            | -3.07)         |        | 22.88)             | 13.33)             | -1.82)         |        | 114.39)          | 13.96)           | -6.57)         |        | 2.41)        | 0.47)        | -6.85)         |
| Russian Federation    | (5.70, 5.44)     | (3.35, 3.12)     | (-1.80, -1.90) | <0.001 | (50.75, 49.94)     | (39.69, 38.89)     | (-0.82, -0.90) | <0.001 | (65.37, 64.46)   | (9.85, 9.46)     | (-6.74, -8.14) | <0.001 | (1.10, 0.98) | (0.14, 0.10) | (-7.31, -8.66) |
|                       | 5.98)            | 3.58)            | -1.70)         |        | 51.56)             | 40.50)             | -0.75)         |        | 66.28)           | 10.25)           | -5.31)         |        | 1.22)        | 0.19)        | -5.95)         |
| Rwanda                | 115.71           | 117.37           | 0.04           |        | 1923.79            | 1973.79            | 0.09           |        | 308.26           | 134.61           | -2.86          |        | 3.56         | 0.67         | -5.62          |
|                       | (110.24, 121.42) | (113.42, 121.43) | (0.02, 0.07)   | 0.002  | (1900.50, 1947.32) | (1957.08, 1990.61) | (0.07, 0.10)   | <0.001 | (298.97, 317.80) | (130.28, 139.06) | (-3.07, -2.65) | <0.001 | (2.62, 4.76) | (0.40, 1.07) | (-5.98, -5.27) |
| Saint Kitts and Nevis | (5.31, 0.00)     | (1.30, 0.00)     | (-4.86, -5.11) | <0.001 | (57.79, 18.32)     | (22.63, 3.95)      | (-3.21, -3.31) | <0.001 | (220.51, 131.50) | (25.92, 5.21)    | (-7.10, -7.52) | <0.001 | (3.74, 0.00) | (0.40, 0.00) | (-7.39, -8.03) |
|                       | 60.22)           | 38.80)           | -4.60)         |        | 140.19)            | 73.71)             | -3.11)         |        | 349.48)          | 78.89)           | -6.68)         |        | 57.50)       | 37.12)       | -6.74)         |
| Saint Lucia           | (71.60, 44.50)   | (70.25, 44.51)   | (-0.06, -0.09) | 0.001  | (1461.65, 1321.82) | (1469.60, 1342.84) | (0.02, 0.00)   | 0.049  | (270.63, 211.13) | (130.41, 94.82)  | (-2.50, -2.82) | <0.001 | (3.44, 0.05) | (1.04, 0.00) | (-4.09, -4.61) |
|                       | 111.54)          | 105.83)          | -0.03)         |        | ,                  | ,                  | 0.04)          |        | 343.06)          | 175.45)          | -2.18)         |        | 24.02)       | 14.15)       | -3.57)         |

|                                  |         |         |         |        |          |          |         |        |          |          |         |        |        |        |         |        |
|----------------------------------|---------|---------|---------|--------|----------|----------|---------|--------|----------|----------|---------|--------|--------|--------|---------|--------|
|                                  |         |         |         |        | 1613.65) | 1605.48) |         |        |          |          |         |        |        |        |         |        |
|                                  |         |         |         |        | 1399.90  | 1398.56  |         |        |          |          |         |        |        |        |         |        |
| Saint Vincent and the Grenadines | 76.15   | 73.92   | -0.10   |        | (1245.79 | (1241.95 | -0.01   | 0.781  | 210.77   | 128.60   | -1.64   |        | 2.42   | 1.05   | -2.75   |        |
|                                  | (44.98, | (41.53, | (-0.11, | <0.001 | ,        | ,        | (-0.04, |        | (153.15, | (84.46,  | (-2.27, | <0.001 | (0.00, | (0.00, | (-3.65, | <0.001 |
|                                  | 124.21) | 121.73) | -0.09)  |        |          |          | 0.03)   |        | 285.23)  | 187.80)  | -1.00)  |        | 27.92) | 20.43) | -1.83)  |        |
|                                  |         |         |         |        | 1569.84) | 1569.61) |         |        |          |          |         |        |        |        |         |        |
|                                  |         |         |         |        | 894.96   | 922.83   | 0.11    |        | 438.54   | 373.32   | -0.52   |        | 6.73   | 5.57   | -0.62   |        |
| Samoa                            | (22.61, | (25.32, | (0.02,  | <0.001 | (789.83, | (830.30, | (0.09,  | <0.001 | (363.23, | (314.17, | (-0.64, | <0.001 | (0.66, | (0.70, | (-0.73, | <0.001 |
|                                  | 75.79)  | 70.04)  | 0.07)   |        | 1011.59) | 1023.51) | 0.12)   |        | 526.01)  | 440.94)  | -0.40)  |        | 28.24) | 20.88) | -0.50)  |        |
|                                  |         |         |         |        | 7.78     | 7.54     | -0.11   |        | 8.06     | 6.42     | -0.77   |        | 0.13   | 0.10   | -1.01   |        |
| San Marino                       | (0.00,  | (0.00,  | (-0.37, | 0.008  | (0.00,   | (0.00,   | (-0.13, | <0.001 | (0.00,   | (0.00,   | (-0.89, | <0.001 | (0.00, | (0.00, | (-1.74, | 0.008  |
|                                  | 94.19)  | 79.74)  | -0.06)  |        | 107.90)  | 92.67)   | -0.09)  |        | 108.54)  | 90.52)   | -0.66)  |        | 93.55) | 79.15) | -0.27)  |        |
|                                  |         |         |         |        | 1273.90  | 1391.78  | 0.31    |        | 156.85   | 122.00   | -0.71   |        | 1.60   | 0.92   | -2.11   |        |
| Sao Tome and Principe            | (39.78, | (51.84, | (0.23,  | <0.001 | (1123.21 | (1281.56 | (0.30,  | <0.001 | (106.82, | (91.00,  | (-1.43, | 0.060  | (0.00, | (0.00, | (-2.99, | <0.001 |
|                                  | 118.67) | 106.01) | 0.25)   |        | ,        | ,        | 0.32)   |        | 224.89)  | 160.63)  | 0.03)   |        | 28.01) | 11.75) | -1.23)  |        |
|                                  |         |         |         |        | 1441.40) | 1509.34) |         |        |          |          |         |        |        |        |         |        |
|                                  |         |         |         |        | 31.74    | 23.02    | -1.12   |        | 128.70   | 29.78    | -4.94   |        | 2.15   | 0.49   | -5.01   |        |
| Saudi Arabia                     | (1.91,  | (1.52,  | (-1.20, | <0.001 | (29.59,  | (21.97,  | (-1.19, | <0.001 | (124.31, | (28.59,  | (-5.48, | <0.001 | (1.61, | (0.35, | (-5.48, | <0.001 |
|                                  | 3.21)   | 2.13)   | -0.96)  |        | 34.02)   | 24.13)   | -1.05)  |        | 133.21)  | 31.03)   | -4.39)  |        | 2.83)  | 0.68)  | -4.55)  |        |
|                                  |         |         |         |        | 1273.07  | 1324.10  | 0.15    |        | 136.46   | 90.73    | -1.37   |        | 1.23   | 0.45   | -3.46   |        |
| Senegal                          | (71.07, | (74.44, | (0.08,  | <0.001 | (1254.27 | (1311.09 | (0.12,  | <0.001 | (130.42, | (87.37,  | (-1.63, | <0.001 | (0.71, | (0.24, | (-3.86, | <0.001 |
|                                  | 80.01)  | 80.62)  | 0.11)   |        | ,        | ,        | 0.17)   |        | 142.74)  | 94.21)   | -1.11)  |        | 2.00)  | 0.77)  | -3.05)  |        |
|                                  |         |         |         |        | 1292.10) | 1337.20) |         |        |          |          |         |        |        |        |         |        |
|                                  |         |         |         |        | 5.86     | 6.94     | 0.55    |        | 11.44    | 2.59     | -5.00   |        | 0.19   | 0.04   | -5.15   |        |
| Serbia                           | (0.37,  | (0.47,  | (0.43,  | <0.001 | (4.78,   | (5.65,   | (0.46,  | <0.001 | (9.92,   | (1.84,   | (-5.46, | <0.001 | (0.05, | (0.00, | (-5.97, | <0.001 |
|                                  | 1.23)   | 1.52)   | 0.95)   |        | 7.13)    | 8.46)    | 0.64)   |        | 13.14)   | 3.58)    | -4.55)  |        | 0.55)  | 0.39)  | -4.32)  |        |
|                                  |         |         |         |        | 894.17   | 869.49   | -0.10   |        | 147.62   | 57.90    | -3.19   |        | 1.76   | 0.27   | -6.32   |        |
| Seychelles                       | (17.43, | (16.70, | (-0.21, | <0.001 | (747.81, | (736.02, | (-0.10, | <0.001 | (91.70,  | (27.79,  | (-3.35, | <0.001 | (0.00, | (0.00, | (-7.10, | <0.001 |
|                                  | 97.80)  | 86.66)  | -0.19)  |        | 1064.22) | 1020.97) | -0.09)  |        | 229.18)  | 107.60)  | -3.03)  |        | 38.41) | 24.37) | -5.53)  |        |
|                                  |         |         |         |        | 1255.29  | 1335.41  | 0.22    |        | 151.02   | 113.05   | -0.98   |        | 1.48   | 0.81   | -2.03   |        |
| Sierra Leone                     | (74.21, | (81.59, | (0.20,  | <0.001 | (1229.37 | (1318.28 | (0.19,  | <0.001 | (142.17, | (108.13, | (-1.06, | <0.001 | (0.73, | (0.44, | (-2.36, | <0.001 |
|                                  | 87.31)  | 90.12)  | 0.23)   |        | ,        | ,        | 0.24)   |        | 160.32)  | 118.16)  | -0.90)  |        | 2.74)  | 1.38)  | -1.69)  |        |
|                                  |         |         |         |        | 1281.65) | 1352.72) |         |        |          |          |         |        |        |        |         |        |
| Singapore                        | 1.51    | 0.43    | -4.34   | <0.001 | 20.31    | 10.33    | -2.37   | <0.001 | 48.81    | 5.11     | -7.77   | <0.001 | 0.83   | 0.08   | -8.21   | <0.001 |



|                 |                  |                  |                |        |                    |                    |                |        |                    |                   |                |        |                |                |                |
|-----------------|------------------|------------------|----------------|--------|--------------------|--------------------|----------------|--------|--------------------|-------------------|----------------|--------|----------------|----------------|----------------|
|                 | (0.76, 2.74)     | (0.13, 1.27)     | (-4.65, -4.04) |        | (17.19, 23.87)     | (8.39, 12.69)      | (-2.56, -2.17) |        | (43.96, 54.10)     | (3.83, 6.82)      | (-8.72, -6.82) |        | (0.31, 1.85)   | (0.00, 0.79)   | (-9.26, -7.15) |
|                 | 1.10             | 1.23             | 0.38           |        | 10.79              | 11.94              | 0.32           |        | 15.23              | 6.30              | -2.92          |        | 0.26           | 0.10           | -3.30          |
| Slovakia        | (0.56, 1.96)     | (0.64, 2.26)     | (0.26, 0.49)   | <0.001 | (8.89, 13.01)      | (9.81, 14.48)      | (0.20, 0.45)   | <0.001 | (12.96, 17.80)     | (4.79, 8.22)      | (-3.62, -2.22) | <0.001 | (0.05, 0.83)   | (0.00, 0.77)   | (-3.68, -2.91) |
|                 | 0.70             | 0.76             | 0.20           |        | 5.72               | 6.28               | 0.28           |        | 13.04              | 4.23              | -4.03          |        | 0.22           | 0.07           | -4.19          |
| Slovenia        | (0.14, 2.27)     | (0.13, 2.90)     | (-0.16, 0.56)  | 0.279  | (3.60, 8.73)       | (3.78, 10.06)      | (0.23, 0.34)   | <0.001 | (9.73, 17.21)      | (2.22, 7.57)      | (-4.81, -3.24) | <0.001 | (0.00, 1.53)   | (0.00, 1.92)   | (-5.06, -3.31) |
|                 | 51.00            | 51.79            | 0.06           |        | 840.33             | 855.54             | 0.06           |        | 1333.83            | 1004.92           | -0.98          |        | 22.28          | 16.53          | -1.03          |
| Solomon Islands | (34.44, 73.78)   | (40.15, 65.87)   | (-0.02, 0.14)  | 0.133  | (768.16, 918.25)   | (805.95, 907.49)   | (0.06, 0.07)   | <0.001 | (1236.89, 1436.89) | (950.04, 1062.21) | (-1.13, -0.84) | <0.001 | (11.29, 40.21) | (10.15, 25.50) | (-1.17, -0.89) |
|                 | 125.67           | 136.26           | 0.28           |        | 1992.94            | 2121.03            | 0.22           |        | 282.59             | 197.12            | -1.22          |        | 3.09           | 1.59           | -2.27          |
| Somalia         | (119.59, 132.00) | (132.63, 139.97) | (0.26, 0.30)   | <0.001 | (1967.79, 2018.34) | (2105.99, 2136.16) | (0.20, 0.24)   | <0.001 | (273.14, 292.30)   | (192.57, 201.77)  | (-1.30, -1.14) | <0.001 | (2.17, 4.28)   | (1.20, 2.07)   | (-2.40, -2.13) |
|                 | 104.87           | 105.84           | 0.04           |        | 1845.62            | 1877.75            | 0.06           |        | 302.83             | 124.84            | -3.02          |        | 3.64           | 0.61           | -5.86          |
| South Africa    | (102.70, 107.07) | (103.96, 107.75) | (0.02, 0.06)   | <0.001 | (1836.23, 1855.04) | (1869.93, 1885.60) | (0.04, 0.08)   | <0.001 | (298.99, 306.72)   | (122.84, 126.87)  | (-3.96, -2.07) | <0.001 | (3.22, 4.10)   | (0.48, 0.77)   | (-7.58, -4.10) |
|                 | 90.70            | 95.49            | 0.18           |        | 1777.63            | 1862.85            | 0.16           |        | 182.20             | 135.77            | -0.98          |        | 1.60           | 0.78           | -2.42          |
| South Sudan     | (85.26, 96.46)   | (91.08, 100.07)  | (0.17, 0.19)   | <0.001 | (1751.93, 1803.65) | (1842.30, 1883.60) | (0.15, 0.18)   | <0.001 | (174.08, 190.65)   | (130.28, 141.46)  | (-1.14, -0.82) | <0.001 | (0.92, 2.67)   | (0.42, 1.36)   | (-2.88, -1.96) |
|                 | 0.79             | 0.38             | -2.48          |        | 9.26               | 7.16               | -0.90          |        | 23.12              | 5.21              | -5.05          |        | 0.39           | 0.08           | -5.39          |
| Spain           | (0.60, 1.03)     | (0.25, 0.56)     | (-2.66, -2.30) | <0.001 | (8.57, 9.99)       | (6.52, 7.86)       | (-0.97, -0.83) | <0.001 | (22.02, 24.27)     | (4.67, 5.79)      | (-5.52, -4.58) | <0.001 | (0.26, 0.57)   | (0.03, 0.19)   | (-5.93, -4.84) |
|                 | 3.26             | 1.92             | -1.81          |        | 34.21              | 27.67              | -0.71          |        | 90.02              | 18.46             | -5.20          |        | 1.47           | 0.28           | -5.44          |
| Sri Lanka       | (2.69, 3.91)     | (1.52, 2.38)     | (-1.96, -1.67) | <0.001 | (32.33, 36.18)     | (26.10, 29.32)     | (-0.84, -0.59) | <0.001 | (86.97, 93.16)     | (17.17, 19.82)    | (-5.90, -4.50) | <0.001 | (1.10, 1.92)   | (0.14, 0.50)   | (-6.15, -4.71) |
|                 | 56.44            | 57.03            | 0.04           |        | 823.52             | 864.39             | 0.17           |        | 226.40             | 90.20             | -3.09          |        | 3.12           | 0.82           | -4.46          |
| Sudan           | (54.13, 58.84)   | (55.47, 58.62)   | (0.01, 0.08)   | 0.010  | (814.31, 832.82)   | (858.17, 870.64)   | (0.16, 0.18)   | <0.001 | (221.57, 231.32)   | (88.19, 92.25)    | (-3.21, -2.97) | <0.001 | (2.57, 3.76)   | (0.64, 1.05)   | (-4.60, -4.33) |

|                            |         |         |         |        |          |          |         |        |          |          |         |        |         |         |         |        |
|----------------------------|---------|---------|---------|--------|----------|----------|---------|--------|----------|----------|---------|--------|---------|---------|---------|--------|
|                            | 71.52   | 70.15   | -0.07   |        | 1302.73  | 1314.39  | 0.04    |        | 172.75   | 113.86   | -1.31   |        | 1.86    | 0.87    | -2.42   |        |
| Suriname                   | (54.24, | (55.19, | (-0.11, | 0.001  | (1222.52 | (1246.97 | (0.01,  | 0.003  | (144.08, | (94.66,  | (-2.30, | 0.010  | (0.10,  | (0.02,  | (-4.52, | 0.027  |
|                            | 93.20)  | 87.94)  | -0.03)  |        | ,        | ,        | 0.06)   |        | 205.90)  | 135.86)  | -0.31)  |        | 9.47)   | 5.15)   | -0.28)  |        |
|                            |         |         |         |        | 1387.25) | 1384.54) |         |        |          |          |         |        |         |         |         |        |
|                            | 0.29    | 0.26    | -0.45   |        | 5.67     | 5.31     | -0.25   |        | 5.31     | 1.62     | -3.91   |        | 0.08    | 0.02    | -4.43   |        |
| Sweden                     | (0.08,  | (0.07,  | (-1.12, | 0.199  | (4.51,   | (4.22,   | (-0.35, | <0.001 | (4.19,   | (1.05,   | (-4.89, | <0.001 | (0.00,  | (0.00,  | (-5.09, | <0.001 |
|                            | 0.75)   | 0.70)   | 0.24)   |        | 7.05)    | 6.61)    | -0.15)  |        | 6.65)    | 2.41)    | -2.93)  |        | 0.44)   | 0.34)   | -3.77)  |        |
|                            | 0.55    | 0.45    | -0.72   |        | 10.25    | 9.61     | -0.25   |        | 6.26     | 1.49     | -4.84   |        | 0.10    | 0.02    | -5.45   |        |
| Switzerland                | (0.22,  | (0.18,  | (-1.01, | <0.001 | (8.56,   | (8.02,   | (-0.32, | <0.001 | (4.98,   | (0.92,   | (-5.34, | <0.001 | (0.01,  | (0.00,  | (-7.46, | <0.001 |
|                            | 1.18)   | 1.03)   | -0.42)  |        | 12.20)   | 11.46)   | -0.19)  |        | 7.81)    | 2.34)    | -4.34)  |        | 0.55)   | 0.42)   | -3.39)  |        |
|                            | 44.39   | 45.35   | 0.08    |        | 750.81   | 775.48   | 0.12    |        | 320.16   | 67.35    | -5.27   |        | 4.78    | 0.50    | -7.53   |        |
| Syrian Arab Republic       | (41.74, | (42.89, | (0.06,  | <0.001 | (739.24, | (764.88, | (0.10,  | <0.001 | (312.51, | (64.25,  | (-5.80, | <0.001 | (3.87,  | (0.27,  | (-8.23, | <0.001 |
|                            | 47.18)  | 47.93)  | 0.10)   |        | 762.53)  | 786.21)  | 0.13)   |        | 327.97)  | 70.58)   | -4.75)  |        | 5.86)   | 0.89)   | -6.83)  |        |
|                            | 3.37    | 2.91    | -0.51   |        | 32.56    | 42.50    | 0.90    |        | 42.14    | 6.95     | -5.96   |        | 0.69    | 0.08    | -7.17   |        |
| Taiwan (Province of China) | (2.86,  | (2.42,  | (-0.60, | <0.001 | (30.93,  | (40.50,  | (0.69,  | <0.001 | (40.27,  | (6.16,   | (-6.56, | <0.001 | (0.47,  | (0.02,  | (-7.77, | <0.001 |
|                            | 3.95)   | 3.48)   | -0.43)  |        | 34.27)   | 44.58)   | 1.11)   |        | 44.07)   | 7.82)    | -5.36)  |        | 0.98)   | 0.26)   | -6.56)  |        |
|                            | 63.72   | 66.32   | 0.14    |        | 1165.60  | 1190.70  | 0.07    |        | 519.45   | 173.63   | -3.65   |        | 7.94    | 2.02    | -4.52   |        |
| Tajikistan                 | (59.07, | (62.80, | (0.13,  | <0.001 | (1144.67 | (1175.56 | (0.07,  | <0.001 | (505.10, | (167.84, | (-4.06, | <0.001 | (6.23,  | (1.44,  | (-5.05, | <0.001 |
|                            | 68.68)  | 70.00)  | 0.15)   |        | ,        | ,        | 0.08)   |        | 534.14)  | 179.58)  | -3.23)  |        | 10.01)  | 2.77)   | -3.99)  |        |
|                            | 44.97   | 41.91   | -0.24   |        | 808.39   | 792.55   | -0.07   |        | 126.86   | 47.41    | -3.40   |        | 1.49    | 0.16    | -7.44   |        |
| Thailand                   | (43.84, | (40.74, | (-0.28, | <0.001 | (803.50, | (787.53, | (-0.09, | <0.001 | (124.91, | (46.19,  | (-3.87, | <0.001 | (1.29,  | (0.10,  | (-8.22, | <0.001 |
|                            | 46.13)  | 43.12)  | -0.21)  |        | 813.30)  | 797.60)  | -0.05)  |        | 128.83)  | 48.66)   | -2.93)  |        | 1.73)   | 0.25)   | -6.66)  |        |
|                            | 55.52   | 55.12   | -0.03   |        | 852.29   | 881.99   | 0.12    |        | 245.48   | 170.73   | -1.13   |        | 3.48    | 2.14    | -1.52   |        |
| Timor-Leste                | (44.44, | (46.65, | (-0.04, | <0.001 | (806.43, | (845.47, | (0.11,  | <0.001 | (220.85, | (154.72, | (-1.84, | 0.002  | (1.14,  | (0.70,  | (-2.44, | 0.001  |
|                            | 68.74)  | 64.93)  | -0.01)  |        | 900.25)  | 919.85)  | 0.13)   |        | 272.27)  | 188.12)  | -0.42)  |        | 8.36)   | 5.28)   | -0.60)  |        |
|                            | 79.02   | 83.08   | 0.17    |        | 1249.42  | 1319.89  | 0.19    |        | 159.10   | 97.58    | -1.68   |        | 1.62    | 0.57    | -3.54   |        |
| Togo                       | (72.72, | (78.78, | (0.16,  | <0.001 | (1223.24 | (1302.41 | (0.18,  | <0.001 | (149.92, | (92.87,  | (-1.80, | <0.001 | (0.81,  | (0.26,  | (-3.85, | <0.001 |
|                            | 85.76)  | 87.56)  | 0.19)   |        | ,        | ,        | 0.20)   |        | 168.75)  | 102.47)  | -1.55)  |        | 2.96)   | 1.08)   | -3.22)  |        |
|                            |         |         |         |        | 1276.07) | 1337.55) |         |        |          |          |         |        |         |         |         |        |
|                            | 15.41   | 11.24   | -1.10   |        | 127.28   | 125.02   | -0.08   |        | 624.06   | 341.48   | -2.06   |        | 10.52   | 5.65    | -2.12   |        |
| Tokelau                    | (0.00,  | (0.00,  | (-1.15, | <0.001 | (0.01,   | (0.00,   | (-0.10, | <0.001 | (53.57,  | (3.27,   | (-2.09, | <0.001 | (0.00,  | (0.00,  | (-2.16, | <0.001 |
|                            | 1731.77 | 2327.55 | -1.04)  |        | 1924.39) | 2518.07) | -0.05)  |        | 2742.90) | 2854.60) | -2.03)  |        | 1723.31 | 2317.46 | -2.08)  |        |

|                      |          |          |         |        |          |          |         |        |          |          |         |        |         |         |         |        |
|----------------------|----------|----------|---------|--------|----------|----------|---------|--------|----------|----------|---------|--------|---------|---------|---------|--------|
|                      | )        | )        |         |        | 1307.74  | 1327.82  |         |        |          |          |         | )      | )       |         |         |        |
|                      | 52.80    | 52.72    | 0.02    |        |          |          |         |        | 234.05   | 159.93   | -1.27   |        | 2.94    | 1.63    | -1.99   |        |
| Tonga                | (24.61,  | (25.70,  | (-0.08, | 0.708  | (1142.75 | (1170.70 | 0.10    | 0.042  | (165.13, | (108.19, | (-1.35, | <0.001 | (0.00,  | (0.00,  | (-2.16, | <0.001 |
|                      | 102.83)  | 97.01)   | 0.12)   |        | ,        | ,        | 0.19)   |        | 324.13)  | 228.47)  | -1.20)  |        | 33.87)  | 24.31)  | -1.83)  |        |
|                      |          |          |         |        | 1492.12) | 1500.80) |         |        |          |          |         |        |         |         |         |        |
|                      |          |          |         |        | 1396.42  | 1405.85  |         |        |          |          |         |        |         |         |         |        |
| Trinidad and Tobago  | 70.92    | 67.82    | -0.15   |        | (1350.30 | (1359.44 | 0.02    | 0.004  | 196.70,  | 103.59   | -2.22   |        | 2.18    | 0.61    | -4.49   |        |
|                      | (60.90,  | (57.58,  | (-0.19, | <0.001 | ,        | ,        | (0.01,  |        | (179.61, | (91.31,  | (-2.79, | <0.001 | (0.74,  | (0.05,  | (-5.28, | <0.001 |
|                      | 82.19)   | 79.44)   | -0.11)  |        | 1443.77) | 1453.53) | 0.04)   |        | 215.05)  | 117.16)  | -1.65)  |        | 5.06)   | 2.84)   | -3.68)  |        |
|                      |          |          |         |        |          |          |         |        |          |          |         |        |         |         |         |        |
|                      | 1.48     | 1.02     | -1.27   |        | 21.87    | 16.48    | -0.97   |        | 56.92    | 15.13    | -4.45   |        | 0.94    | 0.24    | -4.56   |        |
| Tunisia              | (0.93,   | (0.65,   | (-1.40, | <0.001 | (19.64,  | (14.85,  | (-1.01, | <0.001 | (53.28,  | (13.60,  | (-4.56, | <0.001 | (0.52,  | (0.09,  | (-4.92, | <0.001 |
|                      | 2.24)    | 1.54)    | -1.13)  |        | 24.29)   | 18.25)   | -0.94)  |        | 60.77)   | 16.81)   | -4.34)  |        | 1.58)   | 0.56)   | -4.20)  |        |
|                      |          |          |         |        |          |          |         |        |          |          |         |        |         |         |         |        |
|                      | 1.22     | 0.94     | -0.86   |        | 17.45    | 16.24    | -0.24   |        | 23.69    | 5.66     | -4.84   |        | 0.38    | 0.08    | -5.22   |        |
| Turkey               | (1.02,   | (0.80,   | (-1.05, | <0.001 | (16.69,  | (15.63,  | (-0.33, | <0.001 | (22.81,  | (5.31,   | (-5.59, | <0.001 | (0.28,  | (0.04,  | (-6.92, | <0.001 |
|                      | 1.44)    | 1.10)    | -0.68)  |        | 18.23)   | 16.86)   | -0.16)  |        | 24.60)   | 6.03)    | -4.10)  |        | 0.52)   | 0.14)   | -3.49)  |        |
|                      |          |          |         |        |          |          |         |        |          |          |         |        |         |         |         |        |
|                      | 61.77    | 59.55    | -0.13   |        | 1128.44  | 1126.20  | -0.01   |        | 380.81   | 193.33   | -2.15   |        | 5.47    | 2.31    | -2.71   |        |
| Turkmenistan         | (56.41,  | (54.70,  | (-0.14, | <0.001 | (1104.61 | (1104.93 | (-0.02, | 0.127  | (366.90, | (184.58, | (-3.20, | <0.001 | (3.91,  | (1.45,  | (-3.97, | <0.001 |
|                      | 67.55)   | 64.73)   | -0.11)  |        | ,        | ,        | 0.00)   |        | 395.14)  | 202.39)  | -1.09)  |        | 7.50)   | 3.52)   | -1.44)  |        |
|                      |          |          |         |        | 1152.70) | 1147.77) |         |        |          |          |         |        |         |         |         |        |
|                      | 21.93    | 13.98    | -1.55   |        | 137.41   | 119.98   | -0.48   |        | 923.42   | 454.26   | -2.41   |        | 15.64   | 7.57    | -2.45   |        |
| Tuvalu               | (0.01,   | (0.00,   | (-1.63, | <0.001 | (24.30,  | (20.63,  | (-0.53, | <0.001 | (544.97, | (214.97, | (-2.55, | <0.001 | (0.00,  | (0.00,  | (-2.57, | <0.001 |
|                      | 245.76)  | 222.20)  | -1.47)  |        | 435.69)  | 393.85)  | -0.44)  |        | 1468.90) | 853.69)  | -2.26)  |        | 234.03) | 210.14) | -2.33)  |        |
|                      |          |          |         |        |          |          |         |        |          |          |         |        |         |         |         |        |
|                      | 126.71   | 125.40   | -0.04   |        | 2065.75  | 2303.77  | 0.40    |        | 158.28   | 142.04   | -0.34   |        | 1.01    | 0.54    | -2.15   |        |
| Uganda               | (122.97, | (123.07, | (-0.09, | 0.130  | (2049.79 | (2293.29 | (0.27,  | <0.001 | (153.88, | (139.45, | (-0.67, | 0.041  | (0.68,  | (0.39,  | (-2.73, | <0.001 |
|                      | 130.54)  | 127.77)  | 0.01)   |        | ,        | ,        | 0.53)   |        | 162.79)  | 144.68)  | -0.02)  |        | 1.46)   | 0.73)   | -1.56)  |        |
|                      |          |          |         |        | 2081.83) | 2314.30) |         |        |          |          |         |        |         |         |         |        |
|                      | 2.67     | 2.43     | -0.27   |        | 24.29    | 24.32    | 0.08    |        | 16.13    | 17.71    | 0.35    |        | 0.26    | 0.28    | 0.34    |        |
| Ukraine              | (2.36,   | (2.10,   | (-0.59, | 0.096  | (23.32,  | (23.21,  | (-0.16, | 0.516  | (15.34,  | (16.75,  | (-2.06, | 0.777  | (0.17,  | (0.17,  | (-2.39, | 0.807  |
|                      | 3.01)    | 2.80)    | 0.05)   |        | 25.28)   | 25.48)   | 0.31)   |        | 16.94)   | 18.72)   | 2.82)   |        | 0.38)   | 0.44)   | 3.15)   |        |
|                      |          |          |         |        |          |          |         |        |          |          |         |        |         |         |         |        |
|                      | 37.03    | 38.03    | 0.09    |        | 769.81   | 776.34   | 0.03    |        | 50.76    | 41.10    | -0.71   |        | 0.23    | 0.07    | -4.07   |        |
| United Arab Emirates | (30.32,  | (34.00,  | (0.09,  | <0.001 | (738.47, | (758.78, | (0.02,  | <0.001 | (42.96,  | (37.12,  | (-0.78, | <0.001 | (0.00,  | (0.00,  | (-5.25, | <0.001 |
|                      | 44.85)   | 42.44)   | 0.10)   |        | 802.22)  | 794.26)  | 0.04)   |        | 59.65)   | 45.46)   | -0.64)  |        | 1.92)   | 0.68)   | -2.88)  |        |
|                      |          |          |         |        |          |          |         |        |          |          |         |        |         |         |         |        |
| United Kingdom       | 0.53     | 0.38     | -1.06   | <0.001 | 8.64     | 7.57     | -0.43   | <0.001 | 8.51     | 3.32     | -3.18   | <0.001 | 0.14    | 0.05    | -3.42   | <0.001 |

|                                    |                         |                         |                      |        |                            |                            |                      |        |                         |                         |                      |        |                     |                     |                      |        |
|------------------------------------|-------------------------|-------------------------|----------------------|--------|----------------------------|----------------------------|----------------------|--------|-------------------------|-------------------------|----------------------|--------|---------------------|---------------------|----------------------|--------|
|                                    | (0.40, 0.69)            | (0.28, 0.52)            | (-1.27, -0.85)       |        | (8.08, 9.22)               | (7.06, 8.11)               | (-0.50, -0.37)       |        | (7.97, 9.09)            | (2.99, 3.67)            | (-3.55, -2.81)       |        | (0.08, 0.23)        | (0.02, 0.12)        | (-4.41, -2.42)       |        |
|                                    |                         |                         |                      |        | 1911.41                    | 2027.69                    |                      |        |                         |                         |                      |        |                     |                     |                      |        |
| United Republic of Tanzania        | 113.61 (110.77, 116.51) | 117.97 (116.05, 119.92) | 0.13 (0.10, 0.17)    | <0.001 | (1899.15, 1923.74)         | (2019.40, 2036.00)         | 0.20 (0.19, 0.21)    | <0.001 | (161.85, 165.45)        | (129.90, 132.02)        | (-0.74, -0.68)       | <0.001 | (1.17, 1.53)        | (0.55, 0.71)        | (-2.53, -2.35)       | <0.001 |
| United States of America           | 2.31 (2.19, 2.45)       | 1.58 (1.47, 1.68)       | -1.30 (-1.36, -1.24) | <0.001 | 33.47 (32.98, 33.97)       | 24.80 (24.39, 25.22)       | -1.02 (-1.06, -0.98) | <0.001 | 18.80 (18.44, 19.17)    | 7.15 (6.93, 7.37)       | -3.25 (-3.73, -2.77) | <0.001 | 0.29 (0.25, 0.34)   | 0.10 (0.07, 0.13)   | -3.65 (-5.00, -2.28) | <0.001 |
| United States Virgin Islands       | 1.87 (0.00, 22.95)      | 1.33 (0.00, 28.52)      | -1.19 (-1.33, -1.04) | <0.001 | 29.46 (10.96, 64.50)       | 23.56 (6.10, 63.63)        | -0.78 (-0.91, -0.66) | <0.001 | 55.72 (28.49, 98.90)    | 19.11 (4.09, 56.96)     | -3.58 (-3.98, -3.17) | <0.001 | 0.91 (0.00, 21.19)  | 0.30 (0.00, 26.61)  | -3.78 (-4.05, -3.50) | <0.001 |
| Uruguay                            | 1.93 (0.96, 3.45)       | 1.88 (0.96, 3.34)       | -0.06 (-0.20, 0.08)  | 0.383  | 26.12 (22.10, 30.67)       | 27.20 (23.24, 31.66)       | 0.15 (0.13, 0.16)    | <0.001 | 33.83 (29.23, 38.96)    | 15.32 (12.40, 18.75)    | -2.71 (-3.08, -2.35) | <0.001 | 0.56 (0.12, 1.59)   | 0.24 (0.02, 1.07)   | -2.88 (-3.32, -2.45) | <0.001 |
| Uzbekistan                         | 62.99 (60.67, 65.39)    | 64.01 (62.15, 65.92)    | 0.06 (0.05, 0.07)    | <0.001 | 1114.44 (1104.37, 1124.59) | 1184.36 (1176.36, 1192.41) | 0.21 (0.20, 0.22)    | <0.001 | 523.88 (516.88, 530.95) | 226.01 (222.53, 229.54) | -2.77 (-3.64, -1.88) | <0.001 | 7.96 (7.11, 8.89)   | 2.88 (2.50, 3.31)   | -3.34 (-4.29, -2.38) | <0.001 |
| Vanuatu                            | 49.64 (27.47, 84.00)    | 50.62 (34.22, 72.65)    | 0.06 (0.02, 0.10)    | 0.001  | 945.23 (836.74, 1064.87)   | 960.91 (883.81, 1043.32)   | 0.06 (0.03, 0.08)    | <0.001 | 662.38 (569.98, 766.31) | 699.65 (633.20, 771.51) | 0.18 (-0.09, 0.44)   | 0.203  | 10.50 (2.05, 32.88) | 11.04 (4.18, 24.12) | 0.16 (-0.12, 0.44)   | 0.276  |
| Venezuela (Bolivarian Republic of) | 2.56 (2.08, 3.12)       | 1.63 (1.31, 2.00)       | -1.55 (-1.69, -1.40) | <0.001 | 36.00 (34.14, 37.94)       | 25.60 (24.29, 26.97)       | -1.17 (-1.30, -1.04) | <0.001 | 82.62 (79.78, 85.54)    | 23.07 (21.82, 24.38)    | -4.37 (-5.66, -3.05) | <0.001 | 1.37 (1.03, 1.80)   | 0.37 (0.22, 0.56)   | -4.46 (-5.84, -3.05) | <0.001 |
| Viet Nam                           | 4.43 (4.07, 4.81)       | 2.84 (2.61, 3.08)       | -1.52 (-1.60, -1.44) | <0.001 | 42.28 (41.20, 43.39)       | 35.64 (34.82, 36.49)       | -0.58 (-0.69, -0.46) | <0.001 | 105.77 (104.04, 107.53) | 34.22 (33.42, 35.05)    | -3.80 (-3.97, -3.64) | <0.001 | 1.79 (1.57, 2.03)   | 0.56 (0.46, 0.67)   | -3.95 (-4.13, -3.77) | <0.001 |
| Yemen                              | 64.46 (61.26, 67.79)    | 66.62 (64.66, 68.63)    | 0.11 (-0.03, 0.24)   | 0.119  | 909.31 (896.88, 921.88)    | 979.56 (971.89, 987.29)    | 0.26 (0.15, 0.37)    | <0.001 | 184.38 (178.74, 190.17) | 111.26 (108.67, 113.90) | -1.69 (-1.93, -1.46) | <0.001 | 2.42 (1.80, 3.18)   | 1.11 (0.86, 1.40)   | -2.62 (-2.93, -2.30) | <0.001 |
| Zambia                             | 117.85 (112.64, 118.57) | 121.94 (118.57, 121.94) | 0.12 (0.10, 0.12)    | <0.001 | 2015.76 (1992.73, 2015.76) | 2005.44 (1991.19, 2005.44) | -0.03 (-0.06, -0.03) | 0.079  | 226.74 (219.11, 226.74) | 142.65 (138.88, 142.65) | -1.59 (-1.71, -1.59) | <0.001 | 2.13 (1.44, 2.13)   | 0.78 (0.52, 0.78)   | -3.41 (-3.59, -3.41) | <0.001 |

|                     |         |          |         |        |           |           |         |        |          |          |         |        |        |        |         |        |
|---------------------|---------|----------|---------|--------|-----------|-----------|---------|--------|----------|----------|---------|--------|--------|--------|---------|--------|
|                     | 123.29) | 125.39)  | 0.14)   |        | ,         | ,         | 0.00)   |        | 234.61)  | 146.51)  | -1.47)  |        | 3.08)  | 1.13)  | -3.24)  |        |
|                     |         |          |         |        | 2039.04)  | 2019.77)  |         |        |          |          |         |        |        |        |         |        |
|                     |         |          |         |        | 1614.03)  | 1665.75)  |         |        |          |          |         |        |        |        |         |        |
|                     | 100.45) | 105.38)  | 0.17)   |        |           |           | 0.11)   |        | 270.55)  | 284.63)  | 0.16)   |        | 3.13)  | 3.31)  | 0.17)   |        |
| Zimbabwe            | (96.22, | (101.93, | (0.14,  | <0.001 | (1596.25, | (1651.67, | (0.10,  | <0.001 | (263.38, | (278.86, | (-0.48, | 0.622  | (2.39, | (2.71, | (-0.89, | 0.751  |
|                     | 104.83) | 108.92)  | 0.20)   |        | ,         | ,         | 0.13)   |        | 277.89)  | 290.49)  | 0.81)   |        | 4.04)  | 4.01)  | 1.25)   |        |
|                     |         |          |         |        | 1631.98)  | 1679.92)  |         |        |          |          |         |        |        |        |         |        |
| <b>Men</b>          |         |          |         |        |           |           |         |        |          |          |         |        |        |        |         |        |
|                     | 53.75)  | 54.84)   | 0.08)   |        | 709.22)   | 726.50)   | 0.09)   |        | 176.69)  | 100.99)  | -1.82)  |        | 2.41)  | 1.13)  | -2.46)  |        |
| Afghanistan         | (50.16, | (53.18,  | (0.05,  | <0.001 | (695.18,  | (720.17,  | (0.06,  | <0.001 | (169.64, | (98.56,  | (-1.98, | <0.001 | (1.64, | (0.88, | (-2.65, | <0.001 |
|                     | 57.60)  | 56.55)   | 0.12)   |        | 723.52)   | 732.88)   | 0.11)   |        | 184.00)  | 103.46)  | -1.66)  |        | 3.49)  | 1.44)  | -2.27)  |        |
|                     | 56.91)  | 53.84)   | -0.19)  |        | 1019.52)  | 994.36)   | -0.09)  |        | 99.14)   | 67.93)   | -1.36)  |        | 0.82)  | 0.33)  | -3.18)  |        |
| Albania             | (51.57, | (47.60,  | (-0.21, | <0.001 | (996.18,  | (966.92,  | (-0.09, | <0.001 | (91.96,  | (60.91,  | (-1.62, | <0.001 | (0.30, | (0.03, | (-3.80, | <0.001 |
|                     | 62.69)  | 60.71)   | -0.17)  |        | 1043.28)  | 1022.41)  | -0.08)  |        | 106.76)  | 75.58)   | -1.11)  |        | 1.86)  | 1.40)  | -2.56)  |        |
|                     | 34.15)  | 34.81)   | 0.07)   |        | 482.99)   | 542.38)   | 0.42)   |        | 82.85)   | 41.96)   | -2.31)  |        | 0.99)  | 0.27)  | -4.43)  |        |
| Algeria             | (32.57, | (33.55,  | (0.04,  | <0.001 | (476.76,  | (537.48,  | (0.33,  | <0.001 | (80.29,  | (40.60,  | (-2.44, | <0.001 | (0.72, | (0.17, | (-4.71, | <0.001 |
|                     | 35.80)  | 36.10)   | 0.11)   |        | 489.28)   | 547.31)   | 0.52)   |        | 85.48)   | 43.34)   | -2.17)  |        | 1.32)  | 0.40)  | -4.16)  |        |
|                     | 35.97)  | 37.28)   | 0.12)   |        | 788.50)   | 808.92)   | 0.09)   |        | 309.30)  | 216.47)  | -1.23)  |        | 4.49)  | 2.93)  | -1.63)  |        |
| American Samoa      | (8.89,  | (9.59,   | (0.10,  | <0.001 | (623.68,  | (642.42,  | (0.08,  | <0.001 | (209.12, | (134.27, | (-1.50, | <0.001 | (0.00, | (0.00, | (-1.92, | <0.001 |
|                     | 101.66) | 104.87)  | 0.14)   |        | 986.35)   | 1009.11)  | 0.09)   |        | 443.75)  | 334.49)  | -0.96)  |        | 53.43) | 52.94) | -1.35)  |        |
|                     | 0.36)   | 0.34)    | -0.12)  |        | 6.50)     | 6.26)     | -0.09)  |        | 4.15)    | 2.59)    | -1.60)  |        | 0.07)  | 0.04)  | -1.83)  |        |
| Andorra             | (0.00,  | (0.00,   | (-0.26, | 0.091  | (0.10,    | (0.08,    | (-0.16, | 0.005  | (0.01,   | (0.00,   | (-1.69, | <0.001 | (0.00, | (0.00, | (-1.83, | <0.001 |
|                     | 39.72)  | 38.07)   | 0.02)   |        | 49.50)    | 47.89)    | -0.03)  |        | 45.65)   | 41.73)   | -1.51)  |        | 39.26) | 37.59) | -1.83)  |        |
|                     |         |          |         |        | 1770.11)  | 1781.88)  |         |        | 162.50)  | 118.52)  | -1.04)  |        | 1.21)  | 0.52)  | -2.84)  |        |
| Angola              | (91.96, | (92.06,  | (-0.07, | <0.001 | (1751.46, | (1770.39, | (0.02,  | <0.001 | (156.99, | (115.61, | (-1.29, | <0.001 | (0.78, | (0.35, | (-3.66, | <0.001 |
|                     | 100.53) | 97.23)   | -0.04)  |        | ,         | ,         | 0.03)   |        | 168.17)  | 121.50)  | -0.79)  |        | 1.81)  | 0.76)  | -2.02)  |        |
|                     | 60.42)  | 59.27)   | -0.06)  |        | 1120.20)  | 1108.93)  | -0.03)  |        | 107.96)  | 76.83)   | -1.01)  |        | 0.90)  | 0.39)  | -2.69)  |        |
| Antigua and Barbuda | (25.52, | (28.45,  | (-0.11, | 0.034  | (941.45,  | (956.73,  | (-0.05, | <0.001 | (57.93,  | (41.09,  | (-1.35, | <0.001 | (0.00, | (0.00, | (-3.96, | <0.001 |
|                     | 123.75) | 109.52)  | -0.00)  |        | 1324.72)  | 1278.95)  | -0.02)  |        | 185.88)  | 131.66)  | -0.66)  |        | 36.83) | 23.90) | -1.41)  |        |
|                     | 52.10)  | 52.27)   | 0.01)   |        | 913.25)   | 931.48)   | 0.07)   |        | 81.91)   | 55.06)   | -1.37)  |        | 0.65)  | 0.18)  | -4.34)  |        |
| Argentina           | (50.31, | (50.75,  | (-0.00, | 0.062  | (905.64,  | (925.07,  | (0.06,  | <0.001 | (79.64,  | (53.51,  | (-1.50, | <0.001 | (0.46, | (0.10, | (-4.81, | <0.001 |
|                     | 53.94)  | 53.83)   | 0.02)   |        | 920.92)   | 937.93)   | 0.08)   |        | 84.24)   | 56.65)   | -1.24)  |        | 0.89)  | 0.29)  | -3.87)  |        |
| Armenia             | 61.45)  | 56.99)   | -0.26)  | <0.001 | 1114.97)  | 1058.78)  | -0.18)  | <0.001 | 163.51)  | 82.31)   | -2.42)  | <0.001 | 1.91)  | 0.54)  | -4.49)  | <0.001 |

|            |                   |                   |                   |        |                       |                       |                   |        |                     |                     |                   |        |                 |                 |                   |
|------------|-------------------|-------------------|-------------------|--------|-----------------------|-----------------------|-------------------|--------|---------------------|---------------------|-------------------|--------|-----------------|-----------------|-------------------|
|            | (55.79,<br>67.54) | (50.59,<br>64.04) | (-0.30,<br>-0.22) |        | (1090.50,<br>1139.87) | (1031.57,<br>1086.59) | (-0.21,<br>-0.14) |        | (154.21,<br>173.23) | (74.92,<br>90.32)   | (-2.82,<br>-2.02) |        | (1.03,<br>3.26) | (0.11,<br>1.72) | (-5.12,<br>-3.85) |
|            | 0.66              | 0.60              | -0.32             |        | 17.40                 | 17.30                 | -0.01             |        | 19.33               | 9.18                | -2.52             |        | 0.30            | 0.14            | -2.61             |
| Australia  | (0.42,<br>1.00)   | (0.39,<br>0.89)   | (-0.53,<br>-0.10) | 0.004  | (16.02,<br>18.86)     | (16.05,<br>18.63)     | (-0.09,<br>0.08)  | 0.907  | (17.89,<br>20.87)   | (8.29,<br>10.14)    | (-3.08,<br>-1.97) | <0.001 | (0.15,<br>0.56) | (0.05,<br>0.32) | (-3.37,<br>-1.85) |
|            | 1.16              | 0.46              | -3.13             |        | 15.42                 | 7.13                  | -2.68             |        | 9.85                | 4.20                | -3.00             |        | 0.15            | 0.06            | -3.23             |
| Austria    | (0.68,<br>1.87)   | (0.19,<br>1.00)   | (-3.34,<br>-2.91) | <0.001 | (13.51,<br>17.55)     | (5.83,<br>8.68)       | (-2.83,<br>-2.53) | <0.001 | (8.34,<br>11.58)    | (3.22,<br>5.41)     | (-3.59,<br>-2.41) | <0.001 | (0.02,<br>0.55) | (0.00,<br>0.44) | (-3.71,<br>-2.74) |
|            | 58.84             | 57.16             | -0.11             |        | 1008.90               | 991.93                | -0.06             |        | 169.59              | 98.20               | -1.93             |        | 2.03            | 0.83            | -3.15             |
| Azerbaijan | (55.12,<br>62.77) | (53.90,<br>60.58) | (-0.12,<br>-0.09) | <0.001 | (993.01,<br>1024.99)  | (978.62,<br>1005.39)  | (-0.08,<br>-0.04) | <0.001 | (163.06,<br>176.33) | (94.03,<br>102.53)  | (-2.62,<br>-1.22) | <0.001 | (1.37,<br>2.93) | (0.49,<br>1.34) | (-4.14,<br>-2.14) |
|            | 64.64             | 64.32             | -0.02             |        | 1127.66               | 1114.35               | -0.04             |        | 112.10              | 91.13               | -0.74             |        | 0.97            | 0.64            | -1.44             |
| Bahamas    | (45.78,<br>89.37) | (47.22,<br>85.67) | (-0.03,<br>-0.01) | 0.001  | (1042.26,<br>1218.68) | (1039.27,<br>1193.51) | (-0.05,<br>-0.03) | <0.001 | (86.18,<br>143.94)  | (70.63,<br>115.83)  | (-1.24,<br>-0.23) | 0.005  | (0.00,<br>9.84) | (0.00,<br>6.54) | (-2.42,<br>-0.45) |
|            | 0.77              | 0.66              | -0.53             |        | 14.67                 | 12.43                 | -0.57             |        | 27.22               | 10.87               | -3.14             |        | 0.42            | 0.16            | -3.29             |
| Bahrain    | (0.03,<br>5.46)   | (0.09,<br>2.78)   | (-0.72,<br>-0.35) | <0.001 | (9.12,<br>23.17)      | (8.80,<br>17.30)      | (-0.68,<br>-0.46) | <0.001 | (18.95,<br>38.46)   | (7.31,<br>15.75)    | (-4.03,<br>-2.25) | <0.001 | (0.00,<br>5.02) | (0.00,<br>2.10) | (-4.50,<br>-2.08) |
|            | 50.49             | 50.78             | 0.02              |        | 624.27                | 672.30                | 0.26              |        | 235.87              | 107.87              | -2.53             |        | 3.32            | 1.22            | -3.24             |
| Bangladesh | (49.55,<br>51.44) | (50.01,<br>51.55) | (0.01,<br>0.03)   | <0.001 | (620.84,<br>627.72)   | (669.47,<br>675.13)   | (0.24,<br>0.27)   | <0.001 | (233.81,<br>237.95) | (106.74,<br>109.00) | (-3.07,<br>-1.98) | <0.001 | (3.08,<br>3.58) | (1.10,<br>1.34) | (-4.26,<br>-2.19) |
|            | 61.43             | 61.09             | -0.03             |        | 1143.29               | 1141.69               | -0.01             |        | 109.85              | 78.28               | -1.13             |        | 0.92            | 0.39            | -2.80             |
| Barbados   | (42.31,<br>86.36) | (41.00,<br>87.71) | (-0.08,<br>0.02)  | 0.230  | (1054.81,<br>1237.31) | (1048.83,<br>1240.70) | (-0.03,<br>0.01)  | 0.413  | (83.65,<br>141.78)  | (55.47,<br>107.49)  | (-1.62,<br>-0.63) | <0.001 | (0.00,<br>8.97) | (0.00,<br>8.78) | (-3.74,<br>-1.85) |
|            | 7.38              | 3.18              | -2.89             |        | 40.75                 | 25.50                 | -1.61             |        | 142.77              | 25.60               | -5.76             |        | 2.49            | 0.43            | -5.87             |
| Belarus    | (6.26,<br>8.64)   | (2.41,<br>4.17)   | (-3.01,<br>-2.78) | <0.001 | (38.03,<br>43.61)     | (23.11,<br>28.11)     | (-1.69,<br>-1.54) | <0.001 | (137.68,<br>148.01) | (23.28,<br>28.13)   | (-6.80,<br>-4.72) | <0.001 | (1.86,<br>3.28) | (0.18,<br>0.94) | (-7.10,<br>-4.63) |
|            | 0.43              | 0.41              | -0.21             |        | 6.84                  | 6.86                  | -0.02             |        | 3.73                | 2.38                | -1.58             |        | 0.06            | 0.03            | -2.53             |
| Belgium    | (0.19,<br>0.86)   | (0.17,<br>0.84)   | (-0.53,<br>0.11)  | 0.199  | (5.71,<br>8.13)       | (5.70,<br>8.21)       | (-0.17,<br>0.13)  | 0.827  | (2.91,<br>4.71)     | (1.72,<br>3.22)     | (-1.93,<br>-1.22) | <0.001 | (0.00,<br>0.33) | (0.00,<br>0.31) | (-3.31,<br>-1.75) |
| Belize     | 68.79             | 66.83             | -0.10             | <0.001 | 1107.97               | 1101.98               | -0.02             | 0.037  | 109.04              | 95.49               | -0.41             | 0.035  | 0.91            | 0.71            | -0.73             |

|                   |         |         |         |        |          |          |         |        |          |          |         |        |        |         |         |        |
|-------------------|---------|---------|---------|--------|----------|----------|---------|--------|----------|----------|---------|--------|--------|---------|---------|--------|
|                   | (44.87, | (51.01, | (-0.12, |        | (1000.34 | (1033.16 | (-0.04, |        | (77.35,  | (75.97,  | (-0.80, | (0.00, | (0.00, | (-1.48, |         |        |
|                   | 102.72) | 86.29)  | -0.08)  |        | ,        | ,        | -0.00)  |        | 150.81)  | 118.69)  | -0.03)  | 15.78) | 6.19)  | 0.03)   |         |        |
|                   |         |         |         |        | 1225.14) | 1174.37) |         |        |          |          |         |        |        |         |         |        |
|                   | 72.43   | 74.20   | 0.08    |        | 1142.52  | 1189.73  | 0.14    |        | 132.52   | 93.00    | -1.22   | 1.27   | 0.59   | -2.65   |         |        |
|                   | (66.58, | (70.78, | (0.08,  | <0.001 | (1118.28 | (1175.49 | (0.12,  | <0.001 | (124.39, | (89.05,  | (-1.29, | <0.001 | (0.59, | (0.31,  | (-2.84, | <0.001 |
| Benin             | 78.70)  | 77.76)  | 0.09)   |        | ,        | ,        | 0.15)   |        | 141.09)  | 97.10)   | -1.15)  | 2.44)  | 1.03)  | -2.46)  |         |        |
|                   | 1.23    | 0.70    | -1.97   |        | 22.79    | 15.09    | -1.44   |        | 52.95    | 15.35    | -4.38   | 0.85   | 0.24   | -4.47   |         |        |
|                   | (0.00,  | (0.00,  | (-2.17, | <0.001 | (4.54,   | (0.84,   | (-1.53, | <0.001 | (20.60,  | (0.85,   | (-4.73, | <0.001 | (0.00, | (0.00,  | (-4.95, | <0.001 |
| Bermuda           | 41.90)  | 53.41)  | -1.77)  |        | 74.71)   | 77.25)   | -1.34)  |        | 116.79)  | 77.97)   | -4.02)  | 41.27) | 52.62) | -3.99)  |         |        |
|                   | 58.88   | 55.69   | -0.18   |        | 775.88   | 763.61   | -0.05   |        | 495.66   | 235.05   | -2.53   | 7.70   | 3.26   | -2.92   |         |        |
|                   | (46.92, | (45.45, | (-0.20, | <0.001 | (728.21, | (724.45, | (-0.06, | <0.001 | (457.29, | (213.50, | (-2.68, | <0.001 | (3.58, | (1.20,  | (-3.06, | <0.001 |
| Bhutan            | 73.44)  | 67.65)  | -0.17)  |        | 826.17)  | 804.41)  | -0.04)  |        | 536.69)  | 258.28)  | -2.38)  | 14.94) | 7.23)  | -2.77)  |         |        |
|                   | 67.87   | 67.24   | -0.04   |        | 1091.48  | 1094.09  | 0.00    |        | 122.39   | 73.06    | -1.78   | 1.17   | 0.34   | -4.17   |         |        |
|                   | (63.35, | (64.04, | (-0.05, | <0.001 | (1072.59 | (1080.94 | (-0.03, | 0.996  | (116.09, | (69.69,  | (-1.82, | <0.001 | (0.63, | (0.15,  | (-4.29, | <0.001 |
| Bolivia           | 72.66)  | 70.57)  | -0.02)  |        | ,        | ,        | 0.03)   |        | 128.95)  | 76.55)   | -1.74)  | 2.02)  | 0.68)  | -4.05)  |         |        |
| (Plurinational    |         |         |         |        | 1110.65) | 1107.36) |         |        |          |          |         |        |        |         |         |        |
| State of)         | 1.19    | 1.40    | 0.59    |        | 9.15     | 11.06    | 0.73    |        | 16.89    | 5.14     | -4.28   | 0.28   | 0.08   | -4.66   |         |        |
|                   | (0.62,  | (0.60,  | (0.35,  | <0.001 | (7.38,   | (8.47,   | (0.53,  | <0.001 | (14.45,  | (3.40,   | (-4.97, | <0.001 | (0.05, | (0.00,  | (-5.38, | <0.001 |
| Bosnia and        | 2.09)   | 2.86)   | 0.82)   |        | 11.23)   | 14.27)   | 0.93)   |        | 19.65)   | 7.53)    | -3.59)  | 0.86)  | 0.98)  | -3.94)  |         |        |
| Herzegovina       |         |         |         |        | 1518.92  | 1520.52  | 0.00    |        | 213.73   | 119.66   | -1.96   | 2.32   | 0.77   | -3.71   |         |        |
|                   | 92.59   | 89.07   | -0.13   |        | (1468.40 | (1487.22 | (-0.00, | 0.346  | (194.98, | (110.46, | (-2.12, | <0.001 | (0.76, | (0.21,  | (-3.98, | <0.001 |
|                   | (80.88, | (81.09, | (-0.15, | <0.001 | ,        | ,        | 0.01)   |        | 233.96)  | 129.45)  | -1.81)  | 5.70)  | 2.00)  | -3.44)  |         |        |
| Botswana          | 105.75) | 97.63)  | -0.12)  |        | 1570.89) | 1554.39) |         |        |          |          |         |        |        |         |         |        |
|                   | 71.93   | 70.97   | -0.04   |        | 1202.70  | 1197.69  | -0.02   |        | 136.02   | 79.84    | -1.84   | 1.29   | 0.37   | -4.23   |         |        |
|                   | (71.00, | (70.17, | (-0.06, | <0.001 | (1198.80 | (1194.41 | (-0.03, | 0.002  | (134.72, | (79.00,  | (-2.02, | <0.001 | (1.17, | (0.32,  | (-4.54, | <0.001 |
| Brazil            | 72.87)  | 71.79)  | -0.02)  |        | ,        | ,        | -0.01)  |        | 137.34)  | 80.69)   | -1.65)  | 1.43)  | 0.44)  | -3.92)  |         |        |
|                   | 0.96    | 0.68    | -1.21   |        | 18.27    | 13.20    | -1.13   |        | 44.00    | 16.41    | -3.43   | 0.71   | 0.27   | -3.41   |         |        |
|                   | (0.00,  | (0.01,  | (-1.40, | <0.001 | (9.44,   | (7.29,   | (-1.18, | <0.001 | (29.49,  | (9.81,   | (-4.33, | <0.001 | (0.00, | (0.00,  | (-4.24, | <0.001 |
| Brunei Darussalam | 8.15)   | 5.33)   | -1.03)  |        | 32.28)   | 22.34)   | -1.07)  |        | 63.48)   | 26.17)   | -2.53)  | 7.72)  | 4.65)  | -2.59)  |         |        |
|                   | 3.14    | 1.50    | -2.50   |        | 19.11    | 11.87    | -1.64   |        | 107.13   | 27.86    | -4.35   | 1.83   | 0.47   | -4.49   |         |        |
|                   | (2.33,  | (0.88,  | (-2.64, | <0.001 | (17.00,  | (9.91,   | (-1.77, | <0.001 | (102.03, | (24.79,  | (-5.04, | <0.001 | (1.22, | (0.16,  | (-4.94, | <0.001 |
| Bulgaria          |         |         |         |        |          |          |         |        |          |          |         |        |        |         |         |        |

|                          |          |          |         |        |          |          |         |        |          |          |         |        |        |        |         |        |
|--------------------------|----------|----------|---------|--------|----------|----------|---------|--------|----------|----------|---------|--------|--------|--------|---------|--------|
|                          | 4.15)    | 2.47)    | -2.37)  |        | 21.42)   | 14.15)   | -1.52)  |        | 112.44)  | 31.25)   | -3.65)  | 2.65)  | 1.17)  | -4.05) |         |        |
|                          |          |          |         |        | 1133.48  | 1151.06  |         |        |          |          |         |        |        |        |         |        |
| Burkina Faso             | 74.76    | 75.00    | 0.01    |        | (1115.41 | (1140.34 | 0.05    |        | 90.29    | 80.96    | -0.36   | 0.57   | 0.41   | -1.09  |         |        |
|                          | (70.34,  | (72.36,  | (0.00,  | 0.022  |          |          | (0.03,  | <0.001 | (85.35,  | (78.17,  | (-0.43, | <0.001 | (0.25, | (0.23, | (-1.38, | <0.001 |
|                          | 79.42)   | 77.71)   | 0.02)   |        | ,        | ,        | 0.08)   |        | 95.48)   | 83.83)   | -0.29)  |        | 1.18)  | 0.67)  | -0.81)  |        |
|                          |          |          |         |        | 1151.79) | 1161.85) |         |        |          |          |         |        |        |        |         |        |
|                          |          |          |         |        | 1718.85  | 1791.88  |         |        |          |          |         |        |        |        |         |        |
| Burundi                  | 107.46   | 111.32   | 0.12    |        | (1692.98 | (1774.23 | 0.15    |        | 217.40   | 145.06   | -1.38   | 2.08   | 0.93   | -2.73  |         |        |
|                          | (101.23, | (107.07, | (0.06,  | <0.001 |          |          | (0.10,  | <0.001 | (208.47, | (140.14, | (-1.48, | <0.001 | (1.30, | (0.58, | (-2.94, | <0.001 |
|                          | 114.02)  | 115.71)  | 0.17)   |        | ,        | ,        | 0.20)   |        | 226.65)  | 150.11)  | -1.27)  |        | 3.22)  | 1.43)  | -2.51)  |        |
|                          |          |          |         |        | 1745.04) | 1809.66) |         |        |          |          |         |        |        |        |         |        |
|                          |          |          |         |        | 1257.87  | 1268.81  |         |        |          |          |         |        |        |        |         |        |
| Cabo Verde               | 69.00    | 67.02    | -0.10   |        | (1164.63 | (1208.05 | 0.03    |        | 166.30   | 78.40    | -2.57   | 1.76   | 0.28   | -6.18  |         |        |
|                          | (49.54,  | (53.52,  | (-0.12, | <0.001 |          |          | (0.01,  | <0.001 | (133.04, | (63.85,  | (-2.81, | <0.001 | (0.03, | (0.00, | (-6.89, | <0.001 |
|                          | 95.98)   | 82.99)   | -0.08)  |        | ,        | ,        | 0.04)   |        | 207.14)  | 95.40)   | -2.33)  |        | 14.79) | 3.73)  | -5.46)  |        |
|                          |          |          |         |        | 1358.18) | 1331.93) |         |        |          |          |         |        |        |        |         |        |
|                          |          |          |         |        | 563.16   | 556.64   | -0.08   |        | 244.59   | 106.69   | -2.82   | 3.59   | 1.30   | -3.40  |         |        |
| Cambodia                 | 40.60    | 39.02    | -0.14   |        | (551.86, | (548.93, | (-0.18, | 0.130  | (237.14, | (103.32, | (-2.91, | <0.001 | (2.73, | (0.95, | (-3.48, | <0.001 |
|                          | (37.67,  | (37.00,  | (-0.17, | <0.001 |          |          | 0.02)   |        | 252.24)  | 110.13)  | -2.72)  |        | 4.67)  | 1.74)  | -3.32)  |        |
|                          | 43.73)   | 41.13)   | -0.11)  |        |          |          |         |        |          |          |         |        |        |        |         |        |
|                          |          |          |         |        | 1105.92  | 1186.51  |         |        |          |          |         |        |        |        |         |        |
| Cameroon                 | 69.77    | 74.26    | 0.21    |        | (1090.22 | (1177.61 | 0.24    |        | 104.20   | 86.99    | -0.61   | 0.84   | 0.49   | -1.79  |         |        |
|                          | (65.98,  | (72.10,  | (0.19,  | <0.001 |          |          | (0.23,  | <0.001 | (99.43,  | (84.60,  | (-0.66, | <0.001 | (0.46, | (0.33, | (-2.03, | <0.001 |
|                          | 73.75)   | 76.47)   | 0.24)   |        | ,        | ,        | 0.25)   |        | 109.15)  | 89.44)   | -0.56)  |        | 1.43)  | 0.72)  | -1.55)  |        |
|                          |          |          |         |        | 1121.80) | 1195.46) |         |        |          |          |         |        |        |        |         |        |
|                          |          |          |         |        | 24.18    | 23.66    | -0.07   |        | 8.95     | 5.47     | -1.63   | 0.13   | 0.07   | -2.05  |         |        |
| Canada                   | 1.37     | 1.25     | -0.30   |        | (22.92,  | (22.44,  | (-0.12, | 0.012  | (8.19,   | (4.89,   | (-1.94, | <0.001 | (0.05, | (0.02, | (-3.15, | <0.001 |
|                          | (1.09,   | (0.98,   | (-0.36, | <0.001 |          |          | -0.02)  |        | 9.76)    | 6.10)    | -1.33)  |        | 0.27)  | 0.19)  | -0.94)  |        |
|                          | 1.71)    | 1.57)    | -0.23)  |        |          |          |         |        |          |          |         |        |        |        |         |        |
|                          |          |          |         |        | 1841.38  | 1871.11  |         |        |          |          |         |        |        |        |         |        |
| Central African Republic | 108.85   | 111.69   | 0.09    |        | (1803.77 | (1844.04 | 0.06    |        | 213.77   | 173.07   | -0.72   | 1.94   | 1.30   | -1.34  |         |        |
|                          | (100.08, | (105.34, | (0.08,  | <0.001 |          |          | (0.05,  | <0.001 | (201.42, | (165.10, | (-0.86, | <0.001 | (0.94, | (0.71, | (-1.60, | <0.001 |
|                          | 118.28)  | 118.36)  | 0.11)   |        | ,        | ,        | 0.06)   |        | 226.79)  | 181.35)  | -0.57)  |        | 3.70)  | 2.25)  | -1.08)  |        |
|                          |          |          |         |        | 1879.65) | 1898.51) |         |        |          |          |         |        |        |        |         |        |
|                          |          |          |         |        | 1133.66  | 1150.50  |         |        |          |          |         |        |        |        |         |        |
| Chad                     | 74.23    | 74.24    | -0.00   |        | (1112.09 | (1137.28 | 0.05    |        | 131.21   | 104.40   | -0.72   | 1.25   | 0.80   | -1.42  |         |        |
|                          | (68.95,  | (71.04,  | (-0.02, | 0.831  |          |          | (0.04,  | <0.001 | (124.01, | (100.47, | (-0.84, | <0.001 | (0.64, | (0.49, | (-1.63, | <0.001 |
|                          | 79.84)   | 77.56)   | 0.02)   |        | ,        | ,        | 0.06)   |        | 138.76)  | 108.46)  | -0.60)  |        | 2.25)  | 1.26)  | -1.20)  |        |
|                          |          |          |         |        | 1155.58) | 1163.85) |         |        |          |          |         |        |        |        |         |        |
|                          |          |          |         |        | 25.21    | 20.69    | -0.69   |        | 70.87    | 11.76    | -5.95   | 1.19   | 0.18   | -6.37  |         |        |
| Chile                    | 2.36     | 1.40     | -1.77   |        | (23.36,  | (19.20,  | (-0.77, | <0.001 | (67.74,  | (10.65,  | (-6.38, | <0.001 | (0.82, | (0.07, | (-7.21, | <0.001 |
|                          | (1.81,   | (1.04,   | (-2.02, | <0.001 |          |          |         |        |          |          |         |        |        |        |         |        |



|               |         |         |         |        |           |           |         |        |          |          |         |        |         |         |         |        |
|---------------|---------|---------|---------|--------|-----------|-----------|---------|--------|----------|----------|---------|--------|---------|---------|---------|--------|
|               | 3.03)   | 1.86)   | -1.52)  |        | 27.17)    | 22.27)    | -0.61)  |        | 74.11)   | 12.97)   | -5.51)  | 1.69)  | 0.40)   | -5.52)  |         |        |
|               | 33.94)  | 28.15)  | -0.65)  |        | 597.59)   | 478.94)   | -0.76)  |        | 129.03)  | 41.27)   | -3.89)  | 1.71)  | 0.31)   | -5.82)  |         |        |
| China         | (33.73, | (27.93, | (-0.71, | <0.001 | (596.68,  | (478.07,  | (-0.79, | <0.001 | (128.60, | (41.02,  | (-4.14, | <0.001 | (1.66,  | (0.29,  | (-6.18, | <0.001 |
|               | 34.16)  | 28.37)  | -0.58)  |        | 598.49)   | 479.81)   | -0.74)  |        | 129.45)  | 41.52)   | -3.64)  | 1.76)  | 0.33)   | -5.46)  |         |        |
|               | 1.07)   | 0.91)   | -0.55)  |        | 15.84)    | 14.98)    | -0.19)  |        | 40.55)   | 5.63)    | -6.75)  | 0.66)  | 0.08)   | -7.14)  |         |        |
| Colombia      | (0.83,  | (0.73,  | (-0.80, | <0.001 | (14.89,   | (14.21,   | (-0.26, | <0.001 | (39.03,  | (5.16,   | (-7.77, | <0.001 | (0.48,  | (0.03,  | (-8.13, | <0.001 |
|               | 1.36)   | 1.13)   | -0.30)  |        | 16.83)    | 15.78)    | -0.13)  |        | 42.12)   | 6.13)    | -5.71)  | 0.89)  | 0.16)   | -6.13)  |         |        |
|               | 96.06)  | 99.45)  | 0.12)   |        | 1710.33)  | 1773.23)  | 0.12)   |        | 136.82)  | 109.84)  | -0.75)  | 0.87)  | 0.39)   | -2.73)  |         |        |
| Comoros       | (76.49, | (84.28, | (0.11,  | <0.001 | (1619.58, | (1706.07, | (0.11,  | <0.001 | (112.52, | (93.67,  | (-1.68, | 0.116) | (0.01,  | (0.00,  | (-6.06, | 0.120  |
|               | 119.94) | 116.69) | 0.13)   |        | ,         | ,         | 0.14)   |        | 165.53)  | 128.10)  | 0.19)   | 8.03)  | 3.53)   | 0.72)   |         |        |
|               |         |         |         |        | 1805.40)  | 1842.44)  |         |        |          |          |         |        |         |         |         |        |
|               | 97.49)  | 98.03)  | 0.03)   |        | 1840.42)  | 1840.39)  | -0.02)  |        | 157.13)  | 111.30)  | -1.14)  |        | 1.08)   | 0.37)   | -3.72)  |        |
| Congo         | (88.82, | (92.10, | (-0.05, | 0.413  | (1800.70, | (1814.12, | (-0.10, | 0.732  | (145.95, | (104.93, | (-1.32, | <0.001 | (0.36,  | (0.10,  | (-4.49, | <0.001 |
|               | 106.89) | 104.25) | 0.12)   |        | ,         | ,         | 0.07)   |        | 169.05)  | 117.96)  | -0.95)  |        | 2.71)   | 0.98)   | -2.95)  |        |
|               |         |         |         |        | 1880.88)  | 1866.95)  |         |        |          |          |         |        |         |         |         |        |
|               | 4.54)   | 3.93)   | -0.49)  |        | 65.45)    | 66.59)    | 0.08)   |        | 200.30)  | 109.17)  | -2.15)  |        | 3.23)   | 1.75)   | -2.17)  |        |
| Cook Islands  | (0.00,  | (0.00,  | (-0.58, | <0.001 | (11.00,   | (6.89,    | (0.01,  | 0.035  | (84.21,  | (22.28,  | (-2.63, | <0.001 | (0.00,  | (0.00,  | (-2.66, | <0.001 |
|               | 129.37) | 151.72) | -0.40)  |        | 225.31)   | 259.90)   | 0.16)   |        | 413.45)  | 325.52)  | -1.66)  |        | 126.95) | 147.37) | -1.68)  |        |
|               |         |         |         |        | 1164.97)  | 1148.91)  | -0.05)  |        | 105.55)  | 81.82)   | -0.83)  |        | 0.83)   | 0.45)   | -1.98)  |        |
| Costa Rica    | (56.93, | (55.71, | (-0.14, | <0.001 | (1138.41, | (1127.25, | (-0.07, | <0.001 | (97.64,  | (76.12,  | (-1.00, | <0.001 | (0.27,  | (0.13,  | (-2.50, | <0.001 |
|               | 69.36)  | 65.94)  | -0.11)  |        | ,         | ,         | -0.03)  |        | 113.97)  | 87.84)   | -0.66)  |        | 1.99)   | 1.15)   | -1.46)  |        |
|               |         |         |         |        | 1192.03)  | 1170.90)  |         |        |          |          |         |        |         |         |         |        |
|               | 74.88)  | 76.08)  | 0.05)   |        | 1184.41)  | 1201.65)  | 0.05)   |        | 118.45)  | 86.92)   | -1.05)  |        | 1.00)   | 0.47)   | -2.55)  |        |
| Cote d'Ivoire | (71.47, | (73.80, | (0.05,  | <0.001 | (1170.44, | (1192.41, | (0.04,  | <0.001 | (114.09, | (84.45,  | (-1.14, | <0.001 | (0.63,  | (0.31,  | (-2.82, | <0.001 |
|               | 78.43)  | 78.42)  | 0.06)   |        | ,         | ,         | 0.06)   |        | 122.95)  | 89.45)   | -0.96)  |        | 1.51)   | 0.70)   | -2.28)  |        |
|               |         |         |         |        | 1198.51)  | 1210.95)  |         |        |          |          |         |        |         |         |         |        |
|               | 1.06)   | 0.80)   | -0.97)  |        | 7.79)     | 6.37)     | -0.70)  |        | 21.26)   | 4.56)    | -5.08)  |        | 0.36)   | 0.07)   | -5.52)  |        |
| Croatia       | (0.52,  | (0.29,  | (-1.42, | <0.001 | (6.13,    | (4.64,    | (-1.01, | <0.001 | (18.44,  | (3.12,   | (-6.10, | <0.001 | (0.09,  | (0.00,  | (-6.44, | <0.001 |
|               | 1.97)   | 1.88)   | -0.51)  |        | 9.78)     | 8.60)     | -0.39)  |        | 24.41)   | 6.53)    | -4.04)  |        | 1.03)   | 0.86)   | -4.58)  |        |
|               |         |         |         |        | 1143.83)  | 1141.50)  | -0.01)  |        | 137.98)  | 81.87)   | -1.78)  |        | 1.38)   | 0.46)   | -3.73)  |        |
| Cuba          | (57.55, | (57.09, | (-0.02, | 0.810  | (1130.27, | (1126.21, | (-0.02, | 0.053  | (133.26, | (77.82,  | (-2.04, | <0.001 | (0.94,  | (0.21,  | (-4.39, | <0.001 |
|               | 63.71)  | 64.34)  | 0.01)   |        | ,         | ,         | 0.00)   |        | 142.82)  | 86.08)   | -1.52)  |        | 1.97)   | 0.90)   | -3.06)  |        |
|               |         |         |         |        | 1157.52)  | 1156.95)  |         |        |          |          |         |        |         |         |         |        |

|                   |         |          |         |        |          |          |         |        |          |          |         |        |        |        |         |        |
|-------------------|---------|----------|---------|--------|----------|----------|---------|--------|----------|----------|---------|--------|--------|--------|---------|--------|
|                   | 0.40    | 0.33     | -0.71   |        | 5.21     | 4.86     | -0.24   |        | 7.02     | 3.34     | -2.46   |        | 0.11   | 0.05   | -2.69   |        |
| Cyprus            | (0.00,  | (0.01,   | (-0.97, | <0.001 | (2.28,   | (2.50,   | (-0.30, | <0.001 | (3.53,   | (1.49,   | (-3.10, | <0.001 | (0.00, | (0.00, | (-3.83, | <0.001 |
|                   | 3.30)   | 2.87)    | -0.45)  |        | 10.28)   | 8.95)    | -0.19)  |        | 12.62)   | 6.94)    | -1.81)  |        | 2.78)  | 2.47)  | -1.53)  |        |
|                   | 1.63    | 1.20     | -1.11   |        | 10.97    | 9.35     | -0.60   |        | 36.98    | 7.10     | -5.48   |        | 0.64   | 0.12   | -5.72   |        |
| Czechia           | (1.12,  | (0.75,   | (-1.42, | <0.001 | (9.56,   | (7.95,   | (-0.83, | <0.001 | (34.32,  | (5.91,   | (-5.89, | <0.001 | (0.34, | (0.01, | (-6.26, | <0.001 |
|                   | 2.31)   | 1.88)    | -0.80)  |        | 12.55)   | 10.96)   | -0.38)  |        | 39.80)   | 8.51)    | -5.06)  |        | 1.12)  | 0.50)  | -5.17)  |        |
| Democratic        | 37.14   | 38.08    | 0.09    |        | 557.26   | 559.39   | 0.00    |        | 110.96   | 88.01    | -0.78   |        | 1.42   | 1.02   | -1.11   |        |
| People's Republic | (35.25, | (36.41,  | (0.08,  | <0.001 | (549.86, | (553.01, | (-0.05, | 0.896  | (107.66, | (85.50,  | (-0.85, | <0.001 | (1.06, | (0.77, | (-1.21, | <0.001 |
| of Korea          | 39.11)  | 39.81)   | 0.09)   |        | 564.75)  | 565.83)  | 0.05)   |        | 114.35)  | 90.58)   | -0.72)  |        | 1.85)  | 1.34)  | -1.01)  |        |
|                   |         |          |         |        | 1826.28  | 1832.41  |         |        | 150.77   | 130.57   | -0.49   |        | 1.00   | 0.68   | -1.35   |        |
| Democratic        | 100.88  | 103.27   | 0.08    |        | (1816.15 | (1826.01 | 0.01    |        | (147.92, | (128.89, | (-0.56, | <0.001 | (0.78, | (0.57, | (-1.62, | <0.001 |
| Republic of the   | (98.59, | (101.80, | (0.07,  | <0.001 | ,        | ,        | (-0.01, | 0.267  | (147.92, | (128.89, | (-0.56, | <0.001 | (0.78, | (0.57, | (-1.62, | <0.001 |
| Congo             | 103.22) | 104.76)  | 0.09)   |        | 1836.47) | 1838.83) | 0.03)   |        | 153.66)  | 132.28)  | -0.43)  |        | 1.27)  | 0.82)  | -1.09)  |        |
|                   | 0.34    | 0.27     | -0.83   |        | 4.64     | 4.24     | -0.31   |        | 8.29     | 1.79     | -5.19   |        | 0.14   | 0.03   | -5.50   |        |
| Denmark           | (0.08,  | (0.05,   | (-1.38, | 0.003  | (3.39,   | (3.02,   | (-0.46, | <0.001 | (6.61,   | (1.04,   | (-6.37, | <0.001 | (0.01, | (0.00, | (-6.65, | <0.001 |
|                   | 0.98)   | 0.91)    | -0.28)  |        | 6.21)    | 5.82)    | -0.15)  |        | 10.29)   | 2.90)    | -4.00)  |        | 0.67)  | 0.51)  | -4.33)  |        |
|                   | 94.21   | 96.91    | 0.10    |        | 1672.77  | 1756.10  | 0.17    |        | 140.23   | 109.60   | -0.84   |        | 0.95   | 0.40   | -2.87   |        |
| Djibouti          | (77.21, | (85.40,  | (0.08,  | <0.001 | (1595.15 | (1705.76 | (0.16,  | <0.001 | (118.75, | (97.31,  | (-1.04, | <0.001 | (0.03, | (0.01, | (-3.36, | <0.001 |
|                   | 114.39) | 109.56)  | 0.12)   |        | ,        | ,        | 0.18)   |        | 164.94)  | 123.03)  | -0.63)  |        | 6.37)  | 2.18)  | -2.38)  |        |
|                   | 68.88   | 67.57    | -0.07   |        | 1158.10  | 1152.91  | -0.03   |        | 141.40   | 98.67    | -1.26   |        | 1.43   | 0.73   | -2.32   |        |
| Dominica          | (33.97, | (30.82,  | (-0.09, | <0.001 | (990.23, | (976.86, | (-0.07, | 0.274  | (86.85,  | (52.52,  | (-1.44, | <0.001 | (0.00, | (0.00, | (-2.53, | <0.001 |
|                   | 127.90) | 128.90)  | -0.06)  |        | 1348.24) | 1351.77) | 0.02)   |        | 219.86)  | 169.09)  | -1.08)  |        | 34.01) | 30.25) | -2.10)  |        |
|                   | 66.87   | 63.86    | -0.16   |        | 1095.17  | 1085.25  | -0.03   |        | 122.90   | 88.08    | -1.11   |        | 1.14   | 0.59   | -2.18   |        |
| Dominican         | (62.80, | (60.62,  | (-0.17, | <0.001 | (1077.97 | (1071.74 | (-0.04, | <0.001 | (117.22, | (84.26,  | (-1.27, | <0.001 | (0.65, | (0.32, | (-2.50, | <0.001 |
| Republic          | 71.16)  | 67.23)   | -0.15)  |        | ,        | ,        | -0.02)  |        | 128.82)  | 92.03)   | -0.94)  |        | 1.89)  | 1.01)  | -1.86)  |        |
|                   |         |          |         |        | 1112.60) | 1098.88) |         |        |          |          |         |        |        |        |         |        |
|                   | 65.02   | 63.67    | -0.08   |        | 1068.70  | 1056.27  | -0.04   |        | 108.98   | 69.78    | -1.56   |        | 0.95   | 0.31   | -3.86   |        |
| Ecuador           | (61.59, | (61.11,  | (-0.09, | <0.001 | (1054.25 | (1045.65 | (-0.05, | <0.001 | (104.41, | (67.07,  | (-1.75, | <0.001 | (0.56, | (0.16, | (-4.32, | <0.001 |
|                   | 68.61)  | 66.31)   | -0.06)  |        | ,        | ,        | -0.03)  |        | 113.72)  | 72.57)   | -1.37)  |        | 1.51)  | 0.56)  | -3.41)  |        |
|                   |         |          |         |        | 1083.30) | 1066.98) |         |        |          |          |         |        |        |        |         |        |
|                   | 46.55   | 48.67    | 0.16    |        | 766.00   | 772.10   | 0.02    |        | 132.80   | 67.81    | -2.33   |        | 1.55   | 0.49   | -3.91   |        |
| Egypt             | (45.30, | (47.73,  | (0.13,  | <0.001 | (760.80, | (768.34, | (-0.01, | 0.205  | (130.66, | (66.70,  | (-2.64, | <0.001 | (1.33, | (0.40, | (-4.44, | <0.001 |

|                   |          |          |         |        |          |          |         |        |          |          |         |        |        |        |         |        |
|-------------------|----------|----------|---------|--------|----------|----------|---------|--------|----------|----------|---------|--------|--------|--------|---------|--------|
|                   | 47.82)   | 49.62)   | 0.18)   |        | 771.23)  | 775.88)  | 0.06)   |        | 134.96)  | 68.93)   | -2.02)  | 1.80)  | 0.60)  | -3.38) |         |        |
|                   |          |          |         |        | 1088.74  | 1095.98  |         |        |          |          |         |        |        |        |         |        |
|                   | 72.79    | 71.10    | -0.08   |        | (1067.67 | (1077.23 | 0.02    |        | 78.70    | 64.55    | -0.66   | 0.45   | 0.21   | -2.67  |         |        |
| El Salvador       | (67.61,  | (66.49,  | (-0.10, | <0.001 | ,        | ,        | (0.01,  | 0.001  | (73.07,  | (60.04,  | (-0.95, | <0.001 | (0.12, | (0.03, | (-4.04, | <0.001 |
|                   | 78.31)   | 75.98)   | -0.06)  |        | 1110.17) | 1114.98) | 0.04)   |        | 84.68)   | 69.33)   | -0.37)  | 1.22)  | 0.73)  | -1.27) |         |        |
|                   |          |          |         |        | 1861.30  | 1715.15  |         |        |          |          |         |        |        |        |         |        |
|                   | 102.97   | 84.21    | -0.70   |        | (1757.65 | (1671.43 | -0.29   |        | 185.81   | 93.56    | -2.35   | 1.49   | 0.18   | -6.99  |         |        |
| Equatorial Guinea | (80.50,  | (75.14,  | (-0.74, | <0.001 | ,        | ,        | (-0.31, | <0.001 | (155.25, | (83.64,  | (-2.48, | <0.001 | (0.05, | (0.00, | (-7.77, | <0.001 |
|                   | 130.50)  | 94.29)   | -0.66)  |        | 1969.95) | 1759.89) | -0.27)  |        | 221.32)  | 104.53)  | -2.23)  | 9.69)  | 1.95)  | -6.20) |         |        |
|                   |          |          |         |        | 2078.74  | 2076.91  |         |        |          |          |         |        |        |        |         |        |
|                   | 126.79   | 124.58   | -0.06   |        | (2040.91 | (2053.39 | -0.02   |        | 222.38   | 158.65   | -1.13   | 1.93   | 0.93   | -2.41  |         |        |
| Eritrea           | (117.95, | (119.03, | (-0.10, | 0.002  | ,        | ,        | (-0.07, | 0.240  | (210.44, | (152.26, | (-1.38, | <0.001 | (0.98, | (0.51, | (-2.76, | <0.001 |
|                   | 136.20)  | 130.34)  | -0.02)  |        | 2117.16) | 2100.65) | 0.02)   |        | 234.89)  | 165.26)  | -0.88)  | 3.56)  | 1.61)  | -2.06) |         |        |
|                   |          |          |         |        | 36.37    | 27.42    |         |        |          |          |         |        |        |        |         |        |
|                   | 5.70     | 3.29     | -1.86   |        | (29.85,  | (20.95,  | -1.03,  | <0.001 | (67.25,  | (5.54,   | (-8.32, | <0.001 | (0.34, | (0.00, | (-9.32, | <0.001 |
| Estonia           | (3.34,   | (1.40,   | (-1.98, | <0.001 | 43.95)   | 35.59)   | -0.89)  |        | 87.65)   | 14.26)   | -5.54)  | 3.48)  | 2.77)  | -8.21) |         |        |
|                   | 9.16)    | 7.08)    | -1.74)  |        | 1491.59  | 1512.40  |         |        |          |          |         |        |        |        |         |        |
|                   | 93.52    | 93.09    | -0.02   |        | (1424.40 | (1463.68 | 0.04    |        | 179.60   | 152.37   | -0.57   | 1.78   | 1.32   | -1.07  |         |        |
| Eswatini          | (77.97,  | (81.51,  | (-0.02, | <0.001 | ,        | ,        | (0.00,  | 0.034  | (156.82, | (137.17, | (-0.73, | <0.001 | (0.24, | (0.28, | (-1.32, | <0.001 |
|                   | 111.72)  | 105.96)  | -0.01)  |        | 1561.43) | 1562.40) | 0.08)   |        | 205.10)  | 168.88)  | -0.41)  | 6.86)  | 3.94)  | -0.82) |         |        |
|                   |          |          |         |        | 1400.27  | 1588.39  |         |        |          |          |         |        |        |        |         |        |
|                   | 92.95    | 95.76    | 0.11    |        | (1392.28 | (1582.99 | 0.43    |        | 190.68   | 112.73   | -1.77   | 1.93   | 0.58   | -4.02  |         |        |
| Ethiopia          | (90.98,  | (94.49,  | (0.08,  | <0.001 | ,        | ,        | (0.38,  | <0.001 | (187.84, | (111.31, | (-1.92, | <0.001 | (1.66, | (0.48, | (-4.22, | <0.001 |
|                   | 94.96)   | 97.05)   | 0.14)   |        | 1408.31) | 1593.81) | 0.49)   |        | 193.56)  | 114.16)  | -1.62)  | 2.25)  | 0.69)  | -3.82) |         |        |
|                   |          |          |         |        | 375.81   | 573.22   |         |        |          |          |         |        |        |        |         |        |
|                   | 25.90    | 30.50    | 0.57    |        | (346.34, | (539.06, | 1.47    |        | 521.24   | 321.83   | -1.57   | 8.18   | 4.76   | -1.85  |         |        |
| Fiji              | (18.62,  | (23.03,  | (0.52,  | <0.001 | 407.24)  | 608.99)  | 1.56)   |        | 557.76)  | 348.92)  | -1.38)  | 14.15) | 9.14)  | -1.32) |         |        |
|                   | 35.23)   | 39.65)   | 0.63)   |        | 4.71     | 4.29     |         |        |          |          |         |        |        |        |         |        |
|                   | 0.35     | 0.26     | -1.03   |        | (3.42,   | (3.02,   | -0.36   |        | 6.21     | 1.44     | -5.01   | 0.10   | 0.02   | -5.96  |         |        |
| Finland           | (0.08,   | (0.04,   | (-1.43, | <0.001 | 6.37)    | 5.95)    | -0.28)  |        | 8.03)    | 2.52)    | -4.38)  | 0.68)  | 0.57)  | -5.27) |         |        |
|                   | 1.04)    | 0.95)    | -0.64)  |        | 6.52     | 6.09     |         |        |          |          |         |        |        |        |         |        |
|                   | 0.46     | 0.38     | -0.64   |        | (6.06,   | (5.62,   | -0.23   |        | 11.19    | 5.11     | -2.67   | 0.18   | 0.08   | -2.74  |         |        |
| France            | (0.34,   | (0.27,   | (-0.82, | <0.001 | 7.02)    | 6.59)    | -0.17)  |        | 11.82)   | 5.57)    | -1.93)  | 0.28)  | 0.16)  | -1.91) |         |        |
|                   | 0.60)    | 0.52)    | -0.46)  |        |          |          |         |        |          |          |         |        |        |        |         |        |

|           |         |         |         |        |          |          |         |        |          |          |         |        |        |        |         |        |
|-----------|---------|---------|---------|--------|----------|----------|---------|--------|----------|----------|---------|--------|--------|--------|---------|--------|
|           | 84.76   | 85.62   | 0.04    |        | 1725.73  | 1746.45  | 0.05    |        | 132.88   | 102.62   | -0.92   |        | 0.78   | 0.30   | -3.29   |        |
| Gabon     | (72.43, | (76.33, | (0.03,  | <0.001 | (1667.38 | (1703.00 | (0.03,  | <0.001 | (117.20, | (92.32,  | (-1.14, | <0.001 | (0.06, | (0.01, | (-3.89, | <0.001 |
|           | 98.72)  | 95.79)  | 0.04)   |        | ,        | ,        | 0.06)   |        | 150.19)  | 113.79)  | -0.70)  |        | 3.59)  | 1.73)  | -2.69)  |        |
|           |         |         |         |        | 1785.70) | 1790.77) |         |        |          |          |         |        |        |        |         |        |
|           |         |         |         |        | 1199.20  | 1259.84  | 0.17    |        | 112.42   | 92.43    | -0.65   |        | 0.88   | 0.51   | -1.78   |        |
| Gambia    | (62.00, | (69.71, | (0.16,  | <0.001 | (1148.13 | (1226.61 | (0.16,  | <0.001 | (97.26,  | (83.64,  | (-1.19, | 0.020  | (0.07, | (0.07, | (-3.12, | 0.010  |
|           | 87.77)  | 86.14)  | 0.17)   |        | ,        | ,        | 0.18)   |        | 129.52)  | 101.98)  | -0.10)  |        | 4.29)  | 1.92)  | -0.42)  |        |
|           |         |         |         |        | 1252.16) | 1293.82) |         |        |          |          |         |        |        |        |         |        |
|           |         |         |         |        | 1024.97  | 1045.00  | 0.07    |        | 187.01   | 147.53   | -0.94   |        | 2.25   | 1.59   | -1.28   |        |
| Georgia   | (54.95, | (54.19, | (0.05,  | <0.001 | (1005.67 | (1019.23 | (0.06,  | <0.001 | (178.81, | (137.92, | (-2.40, | 0.214  | (1.43, | (0.75, | (-2.66, | 0.076  |
|           | 64.44)  | 67.21)  | 0.06)   |        | ,        | ,        | 0.08)   |        | 195.49)  | 157.68)  | 0.55)   |        | 3.37)  | 3.04)  | 0.13)   |        |
|           |         |         |         |        | 1044.56) | 1071.30) |         |        |          |          |         |        |        |        |         |        |
|           | 0.55    | 0.42    | -0.98   |        | 7.64     | 6.83     | -0.44   |        | 13.35    | 5.08     | -3.37   |        | 0.22   | 0.08   | -3.59   |        |
| Germany   | (0.44,  | (0.32,  | (-1.17, | <0.001 | (7.20,   | (6.39,   | (-0.67, | <0.001 | (12.78,  | (4.72,   | (-3.64, | <0.001 | (0.15, | (0.04, | (-3.82, | <0.001 |
|           | 0.69)   | 0.55)   | -0.79)  |        | 8.10)    | 7.29)    | -0.22)  |        | 13.94)   | 5.47)    | -3.10)  |        | 0.31)  | 0.15)  | -3.35)  |        |
|           |         |         |         |        | 1185.47  | 1184.09  | -0.00   |        | 89.42    | 75.43    | -0.59   |        | 0.53   | 0.30   | -1.87   |        |
| Ghana     | (71.36, | (69.97, | (-0.15, | <0.001 | (1172.41 | (1175.67 | (-0.03, | 0.801  | (85.88,  | (73.32,  | (-0.65, | <0.001 | (0.29, | (0.18, | (-2.18, | <0.001 |
|           | 77.80)  | 74.07)  | -0.08)  |        | ,        | ,        | 0.02)   |        | 93.08)   | 77.59)   | -0.53)  |        | 0.90)  | 0.48)  | -1.56)  |        |
|           |         |         |         |        | 1198.64) | 1192.55) |         |        |          |          |         |        |        |        |         |        |
|           | 0.40    | 0.35    | -0.44   |        | 5.99     | 5.73     | -0.12   |        | 6.43     | 2.36     | -3.40   |        | 0.10   | 0.04   | -3.77   |        |
| Greece    | (0.17,  | (0.12,  | (-0.61, | <0.001 | (4.94,   | (4.56,   | (-0.17, | <0.001 | (5.34,   | (1.65,   | (-4.10, | <0.001 | (0.01, | (0.00, | (-4.66, | <0.001 |
|           | 0.80)   | 0.83)   | -0.28)  |        | 7.20)    | 7.11)    | -0.08)  |        | 7.68)    | 3.29)    | -2.70)  |        | 0.38)  | 0.37)  | -2.86)  |        |
|           | 1.64    | 1.34    | -0.70   |        | 25.60    | 23.39    | -0.32   |        | 12.23    | 4.57     | -3.32   |        | 0.19   | 0.06   | -3.91   |        |
| Greenland | (0.00,  | (0.00,  | (-0.78, | <0.001 | (6.37,   | (3.82,   | (-0.33, | <0.001 | (1.28,   | (0.00,   | (-3.52, | <0.001 | (0.00, | (0.00, | (-4.87, | <0.001 |
|           | 44.16)  | 47.57)  | -0.62)  |        | 78.50)   | 82.22)   | -0.30)  |        | 59.24)   | 52.90)   | -3.12)  |        | 42.00) | 45.37) | -2.94)  |        |
|           |         |         |         |        | 1180.53  | 1172.20  | -0.03   |        | 234.38   | 124.99   | -2.09   |        | 3.04   | 1.16   | -3.11   |        |
| Grenada   | (34.37, | (35.36, | (-0.20, | <0.001 | (1019.89 | (1030.19 | (-0.06, | 0.020  | (164.97, | (81.52,  | (-2.60, | <0.001 | (0.00, | (0.00, | (-3.70, | <0.001 |
|           | 121.86) | 110.73) | -0.09)  |        | ,        | ,        | -0.01)  |        | 324.90)  | 184.59)  | -1.58)  |        | 33.57) | 23.12) | -2.52)  |        |
|           |         |         |         |        | 1361.04) | 1329.35) |         |        |          |          |         |        |        |        |         |        |
|           | 31.19   | 31.97   | 0.09    |        | 719.61   | 752.26   | 0.16    |        | 148.10   | 132.37   | -0.43   |        | 1.81   | 1.59   | -0.44   |        |
| Guam      | (15.38, | (15.41, | (0.07,  | <0.001 | (632.63, | (659.72, | (0.15,  | <0.001 | (110.07, | (95.14,  | (-0.62, | <0.001 | (0.01, | (0.00, | (-0.69, | <0.001 |
|           | 56.95)  | 59.26)  | 0.11)   |        | 815.65)  | 854.60)  | 0.16)   |        | 195.51)  | 179.80)  | -0.24)  |        | 15.52) | 16.08) | -0.20)  |        |
|           |         |         |         |        | 1060.75  | 1107.44  | 0.16    | <0.001 | 69.94    | 61.29    | -0.46   | 0.001  | 0.33   | 0.14   | -2.93   | <0.001 |
| Guatemala | 72.18   | 73.84   | 0.08    | <0.001 |          |          |         |        |          |          |         |        |        |        |         |        |

|               |                   |                   |                   |        |                           |                           |                   |        |                     |                     |                   |                 |                 |                   |                   |        |
|---------------|-------------------|-------------------|-------------------|--------|---------------------------|---------------------------|-------------------|--------|---------------------|---------------------|-------------------|-----------------|-----------------|-------------------|-------------------|--------|
|               | (67.83,<br>76.76) | (71.19,<br>76.59) | (0.07,<br>0.10)   |        | (1043.39<br>,<br>1078.34) | (1096.81<br>,<br>1118.15) | (0.14,<br>0.16)   |        | (65.53,<br>74.58)   | (58.81,<br>63.86)   | (-0.74,<br>-0.18) | (0.09,<br>0.84) | (0.05,<br>0.34) | (-3.80,<br>-2.05) |                   |        |
|               | 57.23             | 62.81             | 0.31              |        | 821.39                    | 961.82                    | 0.54              |        | 107.95              | 89.27               | -0.64             | 1.11            | 0.70            | -1.57             |                   |        |
| Guinea        | (52.62,<br>62.15) | (59.56,<br>66.22) | (0.26,<br>0.37)   | <0.001 | (803.26,<br>839.85)       | (948.57,<br>975.23)       | (0.50,<br>0.59)   | <0.001 | (101.50,<br>114.72) | (85.28,<br>93.42)   | (-0.76,<br>-0.52) | <0.001          | (0.55,<br>2.04) | (0.39,<br>1.20)   | (-1.76,<br>-1.38) | <0.001 |
|               | 77.89             | 81.47             | 0.15              |        | 1157.87                   | 1222.38                   | 0.19              |        | 194.26              | 121.32              | -1.61             | 2.22            | 1.02            | -2.65             |                   |        |
| Guinea-Bissau | (65.36,<br>92.42) | (72.73,<br>91.08) | (0.14,<br>0.16)   | <0.001 | (1106.32<br>,<br>1211.42) | (1186.96<br>,<br>1258.67) | (0.17,<br>0.20)   | <0.001 | (173.87,<br>216.64) | (110.38,<br>133.13) | (-1.67,<br>-1.55) | <0.001          | (0.57,<br>6.37) | (0.26,<br>2.87)   | (-2.78,<br>-2.52) | <0.001 |
|               | 77.83             | 75.70             | -0.10             |        | 1164.47                   | 1152.02                   | -0.04             |        | 227.26              | 138.83              | -1.59             | 2.85            | 1.42            | -2.17             |                   |        |
| Guyana        | (65.16,<br>92.48) | (62.91,<br>90.49) | (-0.12,<br>-0.08) | <0.001 | (1112.57<br>,<br>1218.33) | (1099.39<br>,<br>1206.64) | (-0.06,<br>-0.03) | <0.001 | (204.54,<br>251.99) | (120.78,<br>158.95) | (-2.10,<br>-1.07) | <0.001          | (0.85,<br>7.25) | (0.19,<br>5.20)   | (-2.87,<br>-1.48) | <0.001 |
|               | 78.79             | 80.33             | 0.06              |        | 1141.72                   | 1160.04                   | 0.04              |        | 342.52              | 197.48              | -1.80             | 4.84            | 2.39            | -2.31             |                   |        |
| Haiti         | (73.78,<br>84.06) | (76.91,<br>83.88) | (0.03,<br>0.08)   | <0.001 | (1122.00<br>,<br>1161.72) | (1146.77<br>,<br>1173.43) | (-0.02,<br>0.11)  | 0.191  | (331.67,<br>353.65) | (191.99,<br>203.08) | (-2.00,<br>-1.60) | <0.001          | (3.62,<br>6.36) | (1.82,<br>3.10)   | (-2.56,<br>-2.06) | <0.001 |
|               | 71.22             | 70.28             | -0.04             |        | 1115.55                   | 1112.07                   | -0.02             |        | 60.65               | 55.20               | -0.33             | 0.13            | 0.04            | -3.89             |                   |        |
| Honduras      | (65.65,<br>77.18) | (66.71,<br>74.02) | (-0.07,<br>-0.02) | <0.001 | (1092.39<br>,<br>1139.11) | (1097.28<br>,<br>1127.01) | (-0.05,<br>0.02)  | 0.326  | (55.32,<br>66.39)   | (51.94,<br>58.62)   | (-0.37,<br>-0.29) | <0.001          | (0.00,<br>0.81) | (0.00,<br>0.30)   | (-4.68,<br>-3.10) | <0.001 |
|               | 1.97              | 1.41              | -1.16             |        | 13.55                     | 11.28                     | -0.64             |        | 54.41               | 7.11                | -6.91             | 0.94            | 0.11            | -7.26             |                   |        |
| Hungary       | (1.41,<br>2.71)   | (0.89,<br>2.16)   | (-1.37,<br>-0.96) | <0.001 | (11.97,<br>15.29)         | (9.67,<br>13.11)          | (-0.73,<br>-0.55) | <0.001 | (51.20,<br>57.78)   | (5.84,<br>8.60)     | (-7.61,<br>-6.20) | <0.001          | (0.57,<br>1.50) | (0.01,<br>0.50)   | (-7.95,<br>-6.57) | <0.001 |
|               | 0.40              | 0.41              | 0.12              |        | 6.45                      | 7.01                      | 0.29              |        | 4.92                | 2.30                | -2.57             | 0.08            | 0.03            | -3.49             |                   |        |
| Iceland       | (0.00,<br>8.26)   | (0.00,<br>8.18)   | (-0.19,<br>0.43)  | 0.458  | (1.53,<br>18.02)          | (2.05,<br>18.20)          | (0.24,<br>0.34)   | <0.001 | (0.86,<br>15.74)    | (0.16,<br>11.23)    | (-3.00,<br>-2.14) | <0.001          | (0.00,<br>7.64) | (0.00,<br>7.54)   | (-4.34,<br>-2.63) | <0.001 |
|               | 62.76             | 61.89             | 0.02              |        | 819.08                    | 837.77                    | 0.14              |        | 478.38              | 260.88              | -2.04             | 7.34            | 3.72            | -2.30             |                   |        |
| India         | (62.39,<br>63.12) | (61.61,<br>62.17) | (-0.36,<br>0.40)  | 0.927  | (817.73,<br>820.44)       | (836.75,<br>838.80)       | (0.07,<br>0.21)   | <0.001 | (477.35,<br>479.42) | (260.31,<br>261.46) | (-2.43,<br>-1.66) | <0.001          | (7.21,<br>7.47) | (3.65,<br>3.79)   | (-2.71,<br>-1.88) | <0.001 |
|               | 8.78              | 9.42              | 0.24              |        | 126.17                    | 145.71                    | 0.49              |        | 64.45               | 21.17               | -3.78             | 0.99            | 0.23            | -4.88             |                   |        |
| Indonesia     | (8.48,<br>)       | (9.16,<br>)       | (0.20,<br>)       | <0.001 | (125.04,<br>)             | (144.69,<br>)             | (0.46,<br>)       | <0.001 | (63.63,<br>)        | (20.78,<br>)        | (-3.85,<br>)      | <0.001          | (0.89,<br>)     | (0.19,<br>)       | (-5.12,<br>)      | <0.001 |

|                            |         |         |         |        |           |           |         |        |          |          |         |        |        |        |         |        |
|----------------------------|---------|---------|---------|--------|-----------|-----------|---------|--------|----------|----------|---------|--------|--------|--------|---------|--------|
|                            | 9.08)   | 9.69)   | 0.29)   |        | 127.31)   | 146.73)   | 0.52)   |        | 65.27)   | 21.56)   | -3.70)  | 1.10)  | 0.28)  | -4.64) |         |        |
|                            | 43.98)  | 43.00)  | -0.06)  |        | 696.31)   | 695.65)   | 0.00)   |        | 79.45)   | 52.97)   | -1.38)  | 0.76)  | 0.32)  | -2.92) |         |        |
| Iran (Islamic Republic of) | (42.78, | (41.99, | (-0.08, | <0.001 | (691.33,  | (691.74,  | (-0.01, | 0.883  | (77.77,  | (51.89,  | (-1.52, | <0.001 | (0.60, | (0.24, | (-3.45, | <0.001 |
|                            | 45.21)  | 44.03)  | -0.03)  |        | 701.32)   | 699.58)   | 0.01)   |        | 81.15)   | 54.06)   | -1.25)  | 0.95)  | 0.42)  | -2.40) |         |        |
|                            | 47.07)  | 47.40)  | 0.02)   |        | 712.48)   | 720.56)   | 0.03)   |        | 104.16)  | 48.62)   | -2.61)  | 1.19)  | 0.24)  | -5.31) |         |        |
| Iraq                       | (44.77, | (46.04, | (0.00,  | 0.053  | (703.18,  | (715.12,  | (0.01,  | <0.001 | (100.57, | (47.21,  | (-2.75, | <0.001 | (0.83, | (0.15, | (-5.65, | <0.001 |
|                            | 49.46)  | 48.79)  | 0.05)   |        | 721.88)   | 726.03)   | 0.05)   |        | 107.84)  | 50.07)   | -2.47)  | 1.66)  | 0.37)  | -4.96) |         |        |
|                            | 0.44)   | 0.39)   | -0.43)  |        | 6.43)     | 6.45)     | 0.03)   |        | 6.05)    | 2.41)    | -3.26)  | 0.10)  | 0.04)  | -3.07) |         |        |
| Ireland                    | (0.09,  | (0.09,  | (-0.58, | <0.001 | (4.67,    | (4.82,    | (-0.04, | 0.426  | (4.33,   | (1.47,   | (-4.08, | <0.001 | (0.00, | (0.00, | (-3.30, | <0.001 |
|                            | 1.32)   | 1.14)   | -0.28)  |        | 8.66)     | 8.49)     | 0.09)   |        | 8.24)    | 3.76)    | -2.43)  | 0.77)  | 0.59)  | -2.85) |         |        |
|                            | 0.56)   | 0.48)   | -0.52)  |        | 7.51)     | 6.98)     | -0.26)  |        | 20.95)   | 11.00)   | -2.12)  | 0.34)  | 0.18)  | -2.20) |         |        |
| Israel                     | (0.19,  | (0.21,  | (-0.73, | <0.001 | (5.86,    | (5.76,    | (-0.32, | <0.001 | (18.10,  | (9.46,   | (-3.17, | <0.001 | (0.08, | (0.04, | (-3.27, | <0.001 |
|                            | 1.30)   | 0.96)   | -0.31)  |        | 9.49)     | 8.38)     | -0.20)  |        | 24.12)   | 12.74)   | -1.07)  | 0.99)  | 0.54)  | -1.11) |         |        |
|                            | 1.27)   | 0.53)   | -2.99)  |        | 19.24)    | 10.35)    | -2.13)  |        | 25.91)   | 9.06)    | -3.84)  | 0.42)  | 0.14)  | -3.97) |         |        |
| Italy                      | (1.06,  | (0.39,  | (-3.11, | <0.001 | (18.42,   | (9.66,    | (-2.32, | <0.001 | (24.96,  | (8.43,   | (-4.61, | <0.001 | (0.31, | (0.07, | (-4.84, | <0.001 |
|                            | 1.50)   | 0.71)   | -2.87)  |        | 20.09)    | 11.07)    | -1.94)  |        | 26.89)   | 9.73)    | -3.06)  | 0.56)  | 0.25)  | -3.09) |         |        |
|                            |         |         |         |        | 1107.97)  | 1148.29)  | 0.12)   |        | 150.66)  | 99.66)   | -1.43)  | 1.55)  | 0.73)  | -2.60) |         |        |
| Jamaica                    | (53.13, | (54.97, | (0.05,  | <0.001 | (1077.65, | (1121.08, | (0.12,  | <0.001 | (139.80, | (91.76,  | (-2.56, | 0.015  | (0.64, | (0.21, | (-4.99, | 0.038  |
|                            | 67.16)  | 67.73)  | 0.09)   |        | 1139.00)  | 1176.02)  | 0.13)   |        | 162.23)  | 108.08)  | -0.28)  | 3.29)  | 1.87)  | -0.15) |         |        |
|                            | 0.60)   | 0.26)   | -2.93)  |        | 14.71)    | 9.98)     | -1.35)  |        | 9.72)    | 3.62)    | -3.35)  | 0.15)  | 0.05)  | -3.81) |         |        |
| Japan                      | (0.50,  | (0.19,  | (-3.36, | <0.001 | (14.22,   | (9.50,    | (-1.48, | <0.001 | (9.32,   | (3.34,   | (-3.68, | <0.001 | (0.10, | (0.02, | (-4.17, | <0.001 |
|                            | 0.71)   | 0.35)   | -2.51)  |        | 15.22)    | 10.47)    | -1.22)  |        | 10.14)   | 3.91)    | -3.02)  | 0.21)  | 0.10)  | -3.44) |         |        |
|                            | 0.71)   | 0.66)   | -0.22)  |        | 11.24)    | 10.80)    | -0.12)  |        | 16.38)   | 5.75)    | -3.53)  | 0.26)  | 0.09)  | -3.63) |         |        |
| Jordan                     | (0.22,  | (0.39,  | (-0.32, | <0.001 | (8.89,    | (9.59,    | (-0.17, | <0.001 | (13.48,  | (4.88,   | (-3.77, | <0.001 | (0.03, | (0.01, | (-3.93, | <0.001 |
|                            | 1.84)   | 1.05)   | -0.11)  |        | 14.11)    | 12.12)    | -0.07)  |        | 19.79)   | 6.74)    | -3.29)  | 1.19)  | 0.29)  | -3.33) |         |        |
|                            | 8.00)   | 3.60)   | -2.75)  |        | 55.38)    | 34.68)    | -1.60)  |        | 225.32)  | 34.09)   | -6.38)  | 3.83)  | 0.56)  | -6.49) |         |        |
| Kazakhstan                 | (7.07,  | (3.00,  | (-2.96, | <0.001 | (52.89,   | (32.76,   | (-1.65, | <0.001 | (220.29, | (32.20,  | (-7.26, | <0.001 | (3.19, | (0.34, | (-7.41, | <0.001 |
|                            | 9.01)   | 4.29)   | -2.55)  |        | 57.95)    | 36.69)    | -1.55)  |        | 230.44)  | 36.07)   | -5.49)  | 4.55)  | 0.88)  | -5.57) |         |        |
|                            | 95.74)  | 95.07)  | -0.02)  |        | 1521.64)  | 1639.79)  | 0.26)   |        | 109.31)  | 106.26)  | -0.10)  | 0.57)  | 0.43)  | -1.01) |         |        |
| Kenya                      | (92.86, | (93.27, | (-0.03, | <0.001 | (1509.52, | (1632.01, | (0.23,  | <0.001 | (106.14, | (104.31, | (-0.17, | 0.008  | (0.37, | (0.32, | (-1.16, | <0.001 |
|                            | 98.69)  | 96.91)  | -0.01)  |        | 1533.84)  | 1647.59)  | 0.28)   |        | 112.57)  | 108.24)  | -0.03)  | 0.87)  | 0.58)  | -0.86) |         |        |

|              |         |         |         |        |          |          |         |          |          |         |        |        |        |         |        |
|--------------|---------|---------|---------|--------|----------|----------|---------|----------|----------|---------|--------|--------|--------|---------|--------|
|              | 44.27   | 44.89   | 0.05    |        | 707.43   | 722.62   | 0.07    | 1201.97  | 884.15   | -1.06   |        | 19.35  | 14.14  | -1.10   |        |
| Kiribati     | (16.91, | (22.06, | (0.03,  | <0.001 | (577.53, | (618.45, | (0.06,  | (1029.02 | (767.66, | (-1.16, | <0.001 | (3.56, | (3.20, | (-1.20, | <0.001 |
|              | 97.56)  | 82.08)  | 0.07)   |        | 860.09)  | 839.96)  | 0.09)   | ,        | 1013.88) | -0.96)  |        | 63.09) | 40.64) | -1.00)  |        |
|              |         |         |         |        |          |          |         | 1397.67) |          |         |        |        |        |         |        |
|              | 0.74    | 0.62    | -0.58   |        | 15.18    | 12.20    | -0.77   | 35.13    | 9.23     | -4.61   |        | 0.54   | 0.14   | -4.53   |        |
| Kuwait       | (0.19,  | (0.24,  | (-0.73, | <0.001 | (11.92,  | (10.12,  | (-0.86, | (29.72,  | (7.32,   | (-5.79, | <0.001 | (0.08, | (0.01, | (-5.80, | <0.001 |
|              | 2.28)   | 1.50)   | -0.44)  |        | 19.22)   | 14.68)   | -0.68)  | 41.37)   | 11.57)   | -3.42)  |        | 2.05)  | 0.87)  | -3.24)  |        |
|              | 62.49   | 62.86   | 0.02    |        | 1008.15  | 1007.73  | -0.00   | 408.46   | 139.61   | -3.55   |        | 6.13   | 1.57   | -4.52   |        |
| Kyrgyzstan   | (57.47, | (58.67, | (0.00,  | 0.049  | (987.38, | (990.77, | (-0.01, | (395.09, | (133.31, | (-4.18, | <0.001 | (4.58, | (0.97, | (-5.42, | <0.001 |
|              | 67.86)  | 67.29)  | 0.03)   |        | 1029.28) | 1024.92) | 0.00)   | 422.19)  | 146.14)  | -2.91)  |        | 8.06)  | 2.43)  | -3.60)  |        |
| Lao People's | 52.70   | 50.39   | -0.14   |        | 747.42   | 746.46   | 0.00    | 244.90   | 152.99   | -1.59   |        | 3.41   | 1.90   | -1.97   |        |
| Democratic   | (47.59, | (46.97, | (-0.18, | <0.001 | (727.46, | (733.04, | (-0.04, | (233.61, | (146.96, | (-1.77, | <0.001 | (2.19, | (1.28, | (-2.16, | <0.001 |
| Republic     | 58.25)  | 54.01)  | -0.11)  |        | 767.81)  | 760.08)  | 0.04)   | 256.64)  | 159.22)  | -1.41)  |        | 5.11)  | 2.72)  | -1.78)  |        |
|              | 8.12    | 3.37    | -3.00   |        | 50.59    | 28.45    | -2.03   | 143.05   | 18.61    | -6.83   |        | 2.45   | 0.30   | -7.55   |        |
| Latvia       | (5.81,  | (1.68,  | (-3.12, | <0.001 | (44.50,  | (22.76,  | (-2.32, | (132.68, | (14.17,  | (-9.87, | <0.001 | (1.27, | (0.01, | (-8.90, | <0.001 |
|              | 11.08)  | 6.36)   | -2.87)  |        | 57.32)   | 35.32)   | -1.74)  | 154.05)  | 24.23)   | -3.68)  |        | 4.32)  | 2.25)  | -6.17)  |        |
|              | 2.42    | 1.13    | -2.61   |        | 30.78    | 16.06    | -2.25   | 61.54    | 20.63    | -3.70   |        | 0.98   | 0.32   | -3.77   |        |
| Lebanon      | (1.29,  | (0.58,  | (-2.82, | <0.001 | (26.33,  | (13.71,  | (-2.37, | (55.29,  | (17.92,  | (-3.88, | <0.001 | (0.34, | (0.07, | (-4.03, | <0.001 |
|              | 4.19)   | 2.02)   | -2.39)  |        | 35.82)   | 18.72)   | -2.13)  | 68.37)   | 23.65)   | -3.52)  |        | 2.29)  | 0.95)  | -3.52)  |        |
|              |         |         |         |        | 1508.51  | 1520.67  | 0.03    | 199.45   | 171.70   | -0.52   |        | 2.09   | 1.63   | -0.86   |        |
| Lesotho      | (87.74, | (88.12, | (-0.08, | 0.010  | (1466.15 | (1486.10 | (0.00,  | (184.23, | (160.20, | (-0.65, | <0.001 | (0.80, | (0.69, | (-1.05, | <0.001 |
|              | 109.23) | 105.78) | -0.01)  |        | ,        | ,        | 0.07)   | 215.68)  | 183.82)  | -0.38)  |        | 4.58)  | 3.26)  | -0.67)  |        |
|              |         |         |         |        | 1159.85  | 1253.77  | 0.26    | 109.49   | 90.19    | -0.66   |        | 0.87   | 0.49   | -2.00   |        |
| Liberia      | (63.61, | (73.31, | (0.22,  | <0.001 | (1120.86 | (1231.24 | (0.25,  | (97.87,  | (84.23,  | (-0.90, | <0.001 | (0.15, | (0.15, | (-2.59, | <0.001 |
|              | 83.45)  | 84.52)  | 0.28)   |        | ,        | ,        | 0.28)   | 122.20)  | 96.47)   | -0.43)  |        | 2.91)  | 1.23)  | -1.40)  |        |
|              |         |         |         |        | 1199.92) | 1276.62) |         |          |          |         |        |        |        |         |        |
|              | 38.02   | 43.10   | 0.44    |        | 635.08   | 707.83   | 0.37    | 73.58    | 50.77    | -1.25   |        | 0.69   | 0.27   | -3.12   |        |
| Libya        | (34.07, | (39.86, | (0.42,  | <0.001 | (618.16, | (694.70, | (0.37,  | (67.99,  | (47.29,  | (-1.52, | <0.001 | (0.25, | (0.08, | (-3.76, | <0.001 |
|              | 42.33)  | 46.55)  | 0.45)   |        | 652.38)  | 721.15)  | 0.38)   | 79.55)   | 54.44)   | -0.98)  |        | 1.56)  | 0.70)  | -2.47)  |        |
|              | 6.79    | 3.21    | -2.59   |        | 39.74    | 25.65    | -1.54   | 117.06   | 17.53    | -6.50   |        | 2.04   | 0.29   | -6.55   |        |
| Lithuania    | (5.00,  | (1.79,  | (-2.78, | <0.001 | (35.19,  | (21.15,  | (-1.84, | (109.20, | (13.92,  | (-8.15, | <0.001 | (1.12, | (0.02, | (-8.20, | <0.001 |
|              | 9.04)   | 5.48)   | -2.40)  |        | 44.72)   | 30.92)   | -1.24)  | 125.34)  | 21.92)   | -4.82)  |        | 3.42)  | 1.59)  | -4.88)  |        |

|                  |          |          |         |        |          |          |         |        |          |          |         |        |        |        |         |        |
|------------------|----------|----------|---------|--------|----------|----------|---------|--------|----------|----------|---------|--------|--------|--------|---------|--------|
|                  | 0.64     | 0.53     | -0.72   |        | 9.79     | 9.45     | -0.14   |        | 12.01    | 4.47     | -3.30   |        | 0.19   | 0.07   | -3.28   |        |
| Luxembourg       | (0.00,   | (0.00,   | (-1.12, | <0.001 | (4.03,   | (4.58,   | (-0.21, | <0.001 | (5.48,   | (1.47,   | (-4.09, | <0.001 | (0.00, | (0.00, | (-4.61, | <0.001 |
|                  | 8.08)    | 5.54)    | -0.32)  |        | 21.00)   | 17.89)   | -0.06)  |        | 23.91)   | 11.21)   | -2.50)  |        | 7.39)  | 4.82)  | -1.94)  |        |
|                  | 98.00    | 102.77   | 0.16    |        | 1652.18  | 1747.88  | 0.20    |        | 285.02   | 192.18   | -1.32   |        | 3.22   | 1.70   | -2.12   |        |
| Madagascar       | (94.00,  | (100.13, | (0.16,  | <0.001 | (1635.02 | (1736.60 | (0.18,  | <0.001 | (278.12, | (188.52, | (-1.63, | <0.001 | (2.52, | (1.37, | (-2.59, | <0.001 |
|                  | 102.14)  | 105.46)  | 0.17)   |        | 1669.49) | 1759.21) | 0.21)   |        | 292.06)  | 195.89)  | -1.00)  |        | 4.07)  | 2.09)  | -1.64)  |        |
|                  | 114.41   | 116.79   | 0.07    |        | 1830.66  | 1885.38  | 0.10    |        | 154.73   | 130.18   | -0.59   |        | 1.04   | 0.62   | -1.74   |        |
| Malawi           | (109.53, | (113.36, | (0.06,  | <0.001 | (1810.26 | (1870.93 | (0.09,  | <0.001 | (148.97, | (126.47, | (-0.67, | <0.001 | (0.63, | (0.40, | (-1.94, | <0.001 |
|                  | 119.49)  | 120.30)  | 0.08)   |        | 1851.26) | 1899.93) | 0.11)   |        | 160.69)  | 133.97)  | -0.51)  |        | 1.67)  | 0.94)  | -1.54)  |        |
|                  | 36.42    | 35.41    | -0.09   |        | 628.88   | 636.97   | 0.05    |        | 133.74   | 52.62    | -3.18   |        | 1.69   | 0.36   | -5.16   |        |
| Malaysia         | (34.51,  | (34.05,  | (-0.11, | <0.001 | (620.79, | (631.16, | (0.04,  | <0.001 | (130.03, | (50.96,  | (-3.37, | <0.001 | (1.30, | (0.24, | (-5.43, | <0.001 |
|                  | 38.41)   | 36.83)   | -0.08)  |        | 637.06)  | 642.81)  | 0.05)   |        | 137.54)  | 54.32)   | -2.98)  |        | 2.17)  | 0.53)  | -4.89)  |        |
|                  | 34.78    | 32.92    | -0.20   |        | 622.80   | 619.08   | -0.03   |        | 99.60    | 46.91    | -2.45   |        | 1.15   | 0.27   | -4.62   |        |
| Maldives         | (18.90,  | (23.58,  | (-0.29, | <0.001 | (544.86, | (578.56, | (-0.04, | 0.002  | (70.03,  | (36.07,  | (-2.91, | <0.001 | (0.00, | (0.00, | (-5.36, | <0.001 |
|                  | 61.11)   | 45.52)   | -0.11)  |        | 710.22)  | 662.39)  | -0.01)  |        | 139.25)  | 60.81)   | -1.98)  |        | 16.49) | 5.38)  | -3.88)  |        |
|                  | 84.51    | 84.04    | -0.02   |        | 1357.34  | 1384.14  | 0.07    |        | 144.01   | 106.86   | -1.02   |        | 1.28   | 0.66   | -2.25   |        |
| Mali             | (79.78,  | (81.20,  | (-0.04, | 0.010  | (1337.59 | (1371.97 | (0.05,  | <0.001 | (137.67, | (103.50, | (-1.20, | <0.001 | (0.75, | (0.42, | (-2.72, | <0.001 |
|                  | 89.47)   | 86.98)   | -0.01)  |        | 1377.32) | 1396.41) | 0.08)   |        | 150.58)  | 110.31)  | -0.85)  |        | 2.07)  | 1.00)  | -1.78)  |        |
|                  | 0.34     | 0.30     | -0.43   |        | 4.73     | 4.43     | -0.24   |        | 8.14     | 5.25     | -1.47   |        | 0.13   | 0.08   | -1.54   |        |
| Malta            | (0.00,   | (0.00,   | (-0.76, | 0.011  | (1.09,   | (0.95,   | (-0.28, | <0.001 | (2.90,   | (1.38,   | (-2.15, | <0.001 | (0.00, | (0.00, | (-2.50, | 0.002  |
|                  | 6.80)    | 8.22)    | -0.10)  |        | 13.73)   | 14.37)   | -0.19)  |        | 18.56)   | 15.39)   | -0.78)  |        | 6.44)  | 7.90)  | -0.57)  |        |
|                  | 41.67    | 41.93    | 0.02    |        | 714.57   | 727.89   | 0.06    |        | 906.70   | 613.48   | -1.35   |        | 14.21  | 9.58   | -1.37   |        |
| Marshall Islands | (10.12,  | (13.87,  | (0.02,  | <0.001 | (546.14, | (584.60, | (0.06,  | <0.001 | (714.73, | (482.57, | (-1.56, | <0.001 | (0.58, | (0.39, | (-1.52, | <0.001 |
|                  | 118.25)  | 97.37)   | 0.03)   |        | 921.73)  | 896.01)  | 0.07)   |        | 1137.34) | 769.28)  | -1.14)  |        | 76.94) | 48.68) | -1.23)  |        |
|                  | 68.45    | 68.11    | -0.03   |        | 1192.24  | 1193.48  | -0.00   |        | 108.93   | 72.86    | -1.36   |        | 0.83   | 0.25   | -3.93   |        |
| Mauritania       | (60.37,  | (62.45,  | (-0.05, | 0.055  | (1156.71 | (1168.65 | (-0.02, | 0.767  | (98.45,  | (66.83,  | (-1.46, | <0.001 | (0.17, | (0.03, | (-4.23, | <0.001 |
|                  | 77.40)   | 74.19)   | 0.00)   |        | 1228.65) | 1218.74) | 0.01)   |        | 120.29)  | 79.33)   | -1.27)  |        | 2.59)  | 1.05)  | -3.63)  |        |
|                  | 36.76    | 35.44    | -0.12   |        | 647.09   | 640.12   | -0.04   |        | 121.85   | 59.76    | -2.29   |        | 1.50   | 0.48   | -3.51   |        |
| Mauritius        | (29.66,  | (28.20,  | (-0.14, | <0.001 | (616.15, | (608.24, | (-0.06, | <0.001 | (108.58, | (50.30,  | (-2.82, | <0.001 | (0.39, | (0.02, | (-4.28, | <0.001 |



|                   |          |          |         |        |          |          |         |        |          |          |         |        |         |        |         |        |
|-------------------|----------|----------|---------|--------|----------|----------|---------|--------|----------|----------|---------|--------|---------|--------|---------|--------|
|                   | 45.09)   | 44.01)   | -0.11)  |        | 679.21)  | 673.27)  | -0.02)  |        | 136.32)  | 70.53)   | -1.76)  |        | 4.00)   | 2.57)  | -2.73)  |        |
|                   | 28.88    | 25.09    | -0.48   |        | 487.05   | 421.16   | -0.50   |        | 72.83    | 29.62    | -3.01   |        | 0.84    | 0.16   | -5.47   |        |
| Mexico            | (28.09,  | (24.47,  | (-0.52, | <0.001 | (483.68, | (418.60, | (-0.51, | <0.001 | (71.50,  | (28.94,  | (-3.14, | <0.001 | (0.70,  | (0.11, | (-5.88, | <0.001 |
|                   | 29.68)   | 25.72)   | -0.44)  |        | 490.45)  | 423.73)  | -0.49)  |        | 74.18)   | 30.31)   | -2.88)  |        | 1.00)   | 0.22)  | -5.05)  |        |
| Micronesia        | 42.10    | 42.05    | -0.00   |        | 713.82   | 723.56   | 0.05    |        | 855.14   | 575.85   | -1.36   |        | 13.70   | 8.93   | -1.47   |        |
| (Federated States | (18.49,  | (19.16,  | (-0.02, | 0.946  | (600.80, | (614.03, | (0.04,  | <0.001 | (729.43, | (477.87, | (-1.43, | <0.001 | (2.39,  | (0.95, | (-1.54, | <0.001 |
| of)               | 83.62)   | 81.59)   | 0.01)   |        | 842.98)  | 848.08)  | 0.06)   |        | 997.18)  | 689.03)  | -1.29)  |        | 44.61)  | 35.70) | -1.41)  |        |
|                   | 0.39     | 0.36     | -0.28   |        | 6.74     | 6.44     | -0.15   |        | 4.45     | 3.48     | -0.84   |        | 0.07    | 0.05   | -1.00   |        |
| Monaco            | (0.00,   | (0.00,   | (-0.37, | <0.001 | (0.00,   | (0.00,   | (-0.18, | <0.001 | (0.00,   | (0.00,   | (-0.89, | <0.001 | (0.00,  | (0.00, | (-1.00, | <0.001 |
|                   | 120.41)  | 86.95)   | -0.19)  |        | 130.42)  | 98.54)   | -0.12)  |        | 126.68)  | 92.92)   | -0.79)  |        | 119.92) | 86.36) | -1.00)  |        |
|                   | 69.36    | 66.34    | -0.16   |        | 1052.85  | 1044.88  | -0.03   |        | 157.88   | 117.86   | -1.03   |        | 1.83    | 1.18   | -1.48   |        |
| Mongolia          | (61.86,  | (60.12,  | (-0.18, | <0.001 | (1021.97 | (1020.49 | (-0.04, | <0.001 | (145.76, | (109.95, | (-1.45, | <0.001 | (0.73,  | (0.53, | (-2.23, | <0.001 |
|                   | 77.66)   | 73.07)   | -0.14)  |        | ,        | ,        | -0.02)  |        | 170.85)  | 126.25)  | -0.62)  |        | 3.94)   | 2.37)  | -0.73)  |        |
|                   | 1.49     | 1.35     | -0.34   |        | 1084.53) | 1069.76) |         |        |          |          |         |        |         |        |         |        |
| Montenegro        | (0.17,   | (0.10,   | (-0.52, | <0.001 | 11.52    | 10.93    | -0.16   |        | 34.92    | 13.67    | -3.33   |        | 0.59    | 0.23   | -3.99   |        |
|                   | (0.17,   | (0.10,   | (-0.52, | <0.001 | (6.46,   | (5.70,   | (-0.26, | 0.003  | (25.55,  | (7.72,   | (-4.02, | <0.001 | (0.01,  | (0.00, | (-5.85, | <0.001 |
|                   | 5.58)    | 6.10)    | -0.17)  |        | 19.06)   | 19.21)   | -0.05)  |        | 46.68)   | 22.64)   | -2.62)  |        | 4.10)   | 4.25)  | -2.10)  |        |
|                   | 47.75    | 47.29    | -0.02   |        | 722.27   | 734.76   | 0.07    |        | 111.05   | 55.32    | -2.34   |        | 1.27    | 0.33   | -4.47   |        |
| Morocco           | (45.89,  | (45.73,  | (-0.04, | 0.076  | (714.80, | (728.57, | (0.05,  | <0.001 | (108.12, | (53.63,  | (-2.63, | <0.001 | (0.97,  | (0.21, | (-4.96, | <0.001 |
|                   | 49.67)   | 48.90)   | 0.00)   |        | 729.80)  | 740.99)  | 0.08)   |        | 114.04)  | 57.05)   | -2.05)  |        | 1.64)   | 0.49)  | -3.98)  |        |
|                   | 118.35   | 116.62   | -0.05   |        | 1857.74  | 1893.55  | 0.07    |        | 146.06   | 138.99   | -0.16   |        | 0.90    | 0.76   | -0.54   |        |
| Mozambique        | (113.76, | (113.77, | (-0.08, | 0.011  | (1838.75 | (1881.48 | (0.04,  | <0.001 | (140.89, | (135.79, | (-0.24, | <0.001 | (0.55,  | (0.55, | (-0.70, | <0.001 |
|                   | 123.09)  | 119.54)  | -0.01)  |        | ,        | ,        | 0.09)   |        | 151.39)  | 142.25)  | -0.09)  |        | 1.42)   | 1.05)  | -0.38)  |        |
|                   | 47.55    | 45.49    | -0.15   |        | 1876.88) | 1905.68) |         |        |          |          |         |        |         |        |         |        |
| Myanmar           | (46.08,  | (44.22,  | (-0.17, | <0.001 | 658.54   | 658.99   | -0.00   |        | 267.26   | 128.51   | -2.48   |        | 3.98    | 1.62   | -3.06   |        |
|                   | (46.08,  | (44.22,  | (-0.17, | <0.001 | (652.99, | (654.13, | (-0.01, | 0.831  | (263.68, | (126.36, | (-2.61, | <0.001 | (3.55,  | (1.39, | (-3.25, | <0.001 |
|                   | 49.05)   | 46.78)   | -0.14)  |        | 664.13)  | 663.87)  | 0.01)   |        | 270.87)  | 130.68)  | -2.34)  |        | 4.45)   | 1.89)  | -2.87)  |        |
|                   | 88.18    | 86.40    | -0.07   |        | 1486.86  | 1490.61  | 0.01    |        | 163.96   | 116.58   | -1.17   |        | 1.52    | 0.74   | -2.42   |        |
| Namibia           | (77.43,  | (78.51,  | (-0.08, | <0.001 | (1439.84 | (1456.76 | (-0.01, | 0.347  | (148.60, | (107.24, | (-1.31, | <0.001 | (0.39,  | (0.18, | (-2.73, | <0.001 |
|                   | 100.20)  | 94.92)   | -0.06)  |        | ,        | ,        | 0.03)   |        | 180.63)  | 126.56)  | -1.02)  |        | 4.31)   | 2.07)  | -2.11)  |        |
|                   | 9.70     | 8.33     | -0.54   |        | 1535.17) | 1525.09) |         |        |          |          |         |        |         |        |         |        |
| Nauru             | (0.00,   | (0.00,   | (-0.61, | <0.001 | 94.02    | 91.79    | -0.11   |        | 574.42   | 471.48   | -0.66   |        | 9.45    | 7.69   | -0.69   |        |
|                   | (0.00,   | (0.00,   | (-0.61, | <0.001 | (10.41,  | (11.95,  | (-0.26, | 0.128  | (291.99, | (232.67, | (-0.84, | <0.001 | (0.00,  | (0.00, | (-0.87, | <0.001 |

|                          |         |         |         |        |          |          |         |        |          |          |         |        |         |         |         |        |
|--------------------------|---------|---------|---------|--------|----------|----------|---------|--------|----------|----------|---------|--------|---------|---------|---------|--------|
|                          | 226.27) | 202.67) | -0.46)  |        | 366.93)  | 339.82)  | 0.03)   |        | 1025.52) | 861.40)  | -0.49)  |        | 225.49) | 201.17) | -0.51)  |        |
|                          | 63.68   | 59.42   | -0.23   |        | 741.13   | 746.77   | 0.04    |        | 505.01   | 243.15   | -2.47   |        | 7.87    | 3.40    | -2.84   |        |
| Nepal                    | (61.09, | (57.49, | (-0.26, | <0.001 | (731.93, | (739.62, | (-0.02, | 0.199  | (497.42, | (239.12, | (-2.65, | <0.001 | (6.94,  | (2.94,  | (-2.97, | <0.001 |
|                          | 66.37)  | 61.40)  | -0.20)  |        | 750.41)  | 753.96)  | 0.09)   |        | 512.68)  | 247.23)  | -2.28)  |        | 8.89)   | 3.93)   | -2.71)  |        |
|                          | 0.38    | 0.36    | -0.19   |        | 6.20     | 6.31     | 0.08    |        | 4.10     | 2.27     | -2.03   |        | 0.06    | 0.03    | -2.86   |        |
| Netherlands              | (0.20,  | (0.17,  | (-0.56, | 0.315  | (5.35,   | (5.39,   | (0.02,  | 0.013  | (3.42,   | (1.74,   | (-2.33, | <0.001 | (0.01,  | (0.00,  | (-4.93, | 0.008  |
|                          | 0.68)   | 0.67)   | 0.18)   |        | 7.15)    | 7.33)    | 0.14)   |        | 4.88)    | 2.91)    | -1.73)  |        | 0.25)   | 0.21)   | -0.74)  |        |
|                          | 1.43    | 0.71    | -2.42   |        | 24.05    | 17.83    | -1.04   |        | 80.16    | 33.37    | -2.99   |        | 1.32    | 0.56    | -2.96   |        |
| New Zealand              | (0.68,  | (0.23,  | (-2.94, | <0.001 | (20.53,  | (14.83,  | (-1.10, | <0.001 | (73.61,  | (29.22,  | (-3.68, | <0.001 | (0.61,  | (0.15,  | (-3.68, | <0.001 |
|                          | 2.65)   | 1.67)   | -1.91)  |        | 28.01)   | 21.27)   | -0.98)  |        | 87.14)   | 37.95)   | -2.30)  |        | 2.51)   | 1.45)   | -2.22)  |        |
|                          | 68.01   | 69.07   | 0.05    |        | 1152.51  | 1183.09  | 0.08    |        | 86.11    | 65.95    | -0.95   |        | 0.52    | 0.15    | -4.23   |        |
| Nicaragua                | (62.11, | (64.82, | (0.04,  | <0.001 | (1126.69 | (1165.10 | (0.05,  | <0.001 | (79.16,  | (61.76,  | (-1.15, | <0.001 | (0.12,  | (0.02,  | (-4.88, | <0.001 |
|                          | 74.40)  | 73.54)  | 0.06)   |        | '        | '        | 0.11)   |        | 93.56)   | 70.36)   | -0.75)  |        | 1.55)   | 0.54)   | -3.58)  |        |
|                          | 72.00   | 75.70   | 0.17    |        | 1122.62  | 1182.02  | 0.18    |        | 141.26   | 105.25   | -0.98   |        | 1.41    | 0.79    | -1.94   |        |
| Niger                    | (67.53, | (73.01, | (0.17,  | <0.001 | (1104.21 | (1170.88 | (0.17,  | <0.001 | (134.84, | (101.95, | (-1.08, | <0.001 | (0.84,  | (0.53,  | (-2.16, | <0.001 |
|                          | 76.72)  | 78.47)  | 0.18)   |        | '        | '        | 0.19)   |        | 147.94)  | 108.64)  | -0.87)  |        | 2.28)   | 1.16)   | -1.72)  |        |
|                          | 72.98   | 75.05   | 0.10    |        | 1227.58  | 1286.14  | 0.16    |        | 121.00   | 84.22    | -1.24   |        | 1.02    | 0.37    | -3.45   |        |
| Nigeria                  | (71.70, | (74.21, | (0.08,  | <0.001 | (1222.22 | (1282.51 | (0.15,  | <0.001 | (119.32, | (83.29,  | (-1.36, | <0.001 | (0.87,  | (0.31,  | (-3.71, | <0.001 |
|                          | 74.27)  | 75.91)  | 0.11)   |        | '        | '        | 0.18)   |        | 122.69)  | 85.16)   | -1.12)  |        | 1.18)   | 0.44)   | -3.20)  |        |
|                          | 6.54    | 4.56    | -1.25   |        | 75.45    | 73.75    | -0.08   |        | 367.57   | 210.43   | -1.95   |        | 6.00    | 3.32    | -2.03   |        |
| Niue                     | (0.00,  | (0.00,  | (-1.28, | <0.001 | (0.00,   | (0.00,   | (-0.10, | <0.001 | (26.10,  | (0.61,   | (-2.20, | <0.001 | (0.00,  | (0.00,  | (-2.26, | <0.001 |
|                          | 1044.21 | 1475.86 | -1.22)  |        | 1170.70) | 1605.77) | -0.06)  |        | 1665.37) | 1850.05) | -1.70)  |        | 1042.86 | 1473.39 | -1.80)  |        |
|                          | )       | )       |         |        |          |          |         |        | )        | )        |         |        | )       | )       |         |        |
|                          | 1.49    | 1.30    | -0.46   |        | 13.16    | 10.95    | -0.61   |        | 46.35    | 14.33    | -3.90   |        | 0.77    | 0.23    | -4.05   |        |
| North Macedonia          | (0.56,  | (0.47,  | (-0.61, | <0.001 | (9.92,   | (8.03,   | (-0.71, | <0.001 | (40.05,  | (10.87,  | (-4.48, | <0.001 | (0.17,  | (0.00,  | (-4.70, | <0.001 |
|                          | 3.22)   | 3.13)   | -0.31)  |        | 17.13)   | 14.73)   | -0.51)  |        | 53.37)   | 18.67)   | -3.32)  |        | 2.19)   | 1.65)   | -3.39)  |        |
|                          | 32.45   | 34.31   | 0.19    |        | 758.57   | 791.46   | 0.14    |        | 114.17   | 96.53    | -0.59   |        | 1.29    | 0.97    | -1.16   |        |
| Northern Mariana Islands | (8.14,  | (5.21,  | (0.17,  | <0.001 | (606.71, | (593.58, | (0.14,  | <0.001 | (61.29,  | (36.43,  | (-0.68, | <0.001 | (0.00,  | (0.00,  | (-1.39, | <0.001 |
|                          | 92.85)  | 131.56) | 0.22)   |        | 940.52)  | 1043.37) | 0.16)   |        | 199.36)  | 219.20)  | -0.50)  |        | 45.30)  | 81.43)  | -0.92)  |        |
| Norway                   | 0.30    | 0.29    | 0.17    | 0.242  | 4.87     | 5.17     | 0.23    | <0.001 | 4.42     | 1.43     | -3.78   | <0.001 | 0.07    | 0.02    | -4.13   | 0.007  |

|                  |                |                |                |        |                    |                    |                |        |                  |                  |                |        |                |                |                |
|------------------|----------------|----------------|----------------|--------|--------------------|--------------------|----------------|--------|------------------|------------------|----------------|--------|----------------|----------------|----------------|
|                  | (0.05, 1.00)   | (0.05, 0.95)   | (-0.11, 0.45)  |        | (3.48, 6.64)       | (3.80, 6.91)       | (0.14, 0.32)   |        | (3.11, 6.12)     | (0.77, 2.47)     | (-4.43, -3.12) |        | (0.00, 0.63)   | (0.00, 0.52)   | (-7.04, -1.13) |
|                  | 0.64           | 0.72           | 0.50           |        | 10.58              | 12.18              | 0.54           |        | 9.51             | 2.39             | -4.59          |        | 0.15           | 0.03           | -5.86          |
| Oman             | (0.15, 1.92)   | (0.36, 1.50)   | (0.18, 0.82)   | 0.002  | (7.95, 13.87)      | (10.44, 14.25)     | (0.44, 0.65)   | <0.001 | (7.02, 12.66)    | (1.64, 3.53)     | (-4.91, -4.26) | <0.001 | (0.00, 1.17)   | (0.00, 0.65)   | (-7.29, -4.40) |
|                  | 75.15          | 78.40          | 0.15           |        | 997.42             | 1050.68            | 0.21           |        | 530.41           | 463.20           | -0.45          |        | 8.06           | 6.80           | -0.57          |
| Pakistan         | (74.01, 76.31) | (77.60, 79.20) | (0.14, 0.17)   | <0.001 | (993.04, 1001.81)  | (1047.65, 1053.71) | (0.15, 0.27)   | <0.001 | (527.20, 533.64) | (461.20, 465.20) | (-0.62, -0.28) | <0.001 | (7.67, 8.47)   | (6.56, 7.05)   | (-0.70, -0.45) |
|                  | 4.96           | 4.00           | -0.74          |        | 59.58              | 58.59              | -0.06          |        | 249.61           | 173.91           | -1.25          |        | 4.04           | 2.80           | -1.26          |
| Palau            | (0.00, 124.48) | (0.00, 137.39) | (-0.78, -0.69) | <0.001 | (8.05, 215.14)     | (7.44, 225.67)     | (-0.07, -0.04) | <0.001 | (114.43, 479.27) | (64.44, 389.83)  | (-1.32, -1.18) | <0.001 | (0.00, 122.59) | (0.00, 135.57) | (-1.34, -1.19) |
|                  | 43.13          | 42.79          | -0.03          |        | 679.63             | 691.46             | 0.06           |        | 53.28            | 39.51            | -1.05          |        | 0.35           | 0.11           | -3.96          |
| Palestine        | (36.81, 50.43) | (38.97, 46.93) | (-0.05, 0.00)  | 0.048  | (652.50, 707.74)   | (675.37, 707.87)   | (0.05, 0.07)   | <0.001 | (45.81, 61.77)   | (35.72, 43.62)   | (-1.19, -0.91) | <0.001 | (0.01, 2.14)   | (0.00, 0.66)   | (-4.62, -3.29) |
|                  | 61.64          | 58.25          | -0.19          |        | 1078.99            | 1058.95            | -0.07          |        | 113.55           | 67.52            | -1.76          |        | 1.01           | 0.28           | -4.26          |
| Panama           | (55.07, 68.84) | (53.13, 63.74) | (-0.23, -0.16) | <0.001 | (1050.22, 1108.39) | (1036.63, 1081.63) | (-0.07, -0.06) | <0.001 | (104.38, 123.36) | (61.98, 73.44)   | (-2.21, -1.31) | <0.001 | (0.32, 2.45)   | (0.04, 0.95)   | (-5.32, -3.19) |
|                  | 41.09          | 41.86          | 0.07           |        | 679.80             | 707.20             | 0.14           |        | 732.57           | 632.99           | -0.55          |        | 11.73          | 9.91           | -0.63          |
| Papua New Guinea | (36.83, 45.74) | (39.11, 44.76) | (0.06, 0.08)   | <0.001 | (662.14, 697.84)   | (695.77, 718.77)   | (0.13, 0.14)   | <0.001 | (713.89, 751.64) | (622.11, 644.01) | (-0.74, -0.37) | <0.001 | (9.45, 14.43)  | (8.58, 11.39)  | (-0.82, -0.44) |
|                  | 65.09          | 62.87          | -0.12          |        | 1161.37            | 1147.52            | -0.05          |        | 92.18            | 74.69            | -0.69          |        | 0.61           | 0.33           | -2.01          |
| Paraguay         | (59.63, 70.94) | (58.95, 66.99) | (-0.13, -0.11) | <0.001 | (1137.42, 1185.71) | (1130.51, 1164.73) | (-0.05, -0.04) | <0.001 | (85.51, 99.25)   | (70.39, 79.18)   | (-1.11, -0.26) | 0.001  | (0.18, 1.51)   | (0.10, 0.78)   | (-2.70, -1.32) |
|                  | 60.75          | 60.27          | -0.04          |        | 1057.53            | 1068.08            | 0.02           |        | 85.26            | 63.32            | -0.95          |        | 0.57           | 0.20           | -3.42          |
| Peru             | (58.48, 63.09) | (58.45, 62.13) | (-0.07, -0.01) | 0.010  | (1047.70, 1067.43) | (1060.37, 1075.83) | (-0.02, 0.06)  | 0.328  | (82.48, 88.11)   | (61.46, 65.23)   | (-1.25, -0.65) | <0.001 | (0.36, 0.87)   | (0.11, 0.34)   | (-4.44, -2.39) |
|                  | 33.30          | 32.20          | -0.12          |        | 461.11             | 499.62             | 0.28           |        | 93.61            | 148.82           | 1.67           |        | 1.17           | 2.02           | 1.98           |
| Philippines      | (32.31, 34.30) | (31.49, 32.93) | (-0.13, -0.11) | <0.001 | (457.35, 464.90)   | (496.76, 502.49)   | (0.18, 0.38)   | <0.001 | (91.92, 95.32)   | (147.27, 150.39) | (1.19, 2.16)   | <0.001 | (0.99, 1.38)   | (1.85, 2.22)   | (1.35, 2.60)   |

|                          |          |         |         |        |          |          |         |        |          |          |         |        |        |        |         |        |
|--------------------------|----------|---------|---------|--------|----------|----------|---------|--------|----------|----------|---------|--------|--------|--------|---------|--------|
|                          | 3.62     | 1.47    | -3.02   |        | 23.67    | 13.90    | -1.81   |        | 112.57   | 11.60    | -7.92   |        | 1.95   | 0.19   | -8.17   |        |
| Poland                   | (3.21,   | (1.20,  | (-3.24, | <0.001 | (22.60,  | (13.03,  | (-2.00, | <0.001 | (110.23, | (10.82,  | (-8.50, | <0.001 | (1.65, | (0.10, | (-8.81, | <0.001 |
|                          | 4.06)    | 1.79)   | -2.80)  |        | 24.78)   | 14.83)   | -1.61)  |        | 114.95)  | 12.44)   | -7.34)  |        | 2.29)  | 0.33)  | -7.53)  |        |
|                          | 1.00     | 0.57    | -1.95   |        | 11.42    | 8.23     | -1.12   |        | 41.50    | 8.54     | -5.41   |        | 0.69   | 0.14   | -5.47   |        |
| Portugal                 | (0.60,   | (0.26,  | (-2.10, | <0.001 | (9.94,   | (6.86,   | (-1.21, | <0.001 | (38.63,  | (7.16,   | (-6.59, | <0.001 | (0.37, | (0.02, | (-7.12, | <0.001 |
|                          | 1.57)    | 1.10)   | -1.80)  |        | 13.06)   | 9.81)    | -1.03)  |        | 44.53)   | 10.13)   | -4.22)  |        | 1.19)  | 0.50)  | -3.79)  |        |
|                          | 0.74     | 0.68    | -0.28   |        | 14.01    | 13.92    | -0.02   |        | 22.22    | 11.80    | -2.16   |        | 0.37   | 0.19   | -2.33   |        |
| Puerto Rico              | (0.24,   | (0.17,  | (-0.36, | <0.001 | (11.33,  | (10.98,  | (-0.09, | 0.667  | (18.77,  | (9.11,   | (-2.83, | <0.001 | (0.06, | (0.01, | (-2.98, | <0.001 |
|                          | 1.75)    | 1.79)   | -0.20)  |        | 17.15)   | 17.41)   | 0.06)   |        | 26.13)   | 15.04)   | -1.49)  |        | 1.21)  | 1.04)  | -1.67)  |        |
|                          | 1.02     | 0.65    | -1.56   |        | 18.72    | 12.11    | -1.52   |        | 41.74    | 8.25     | -5.62   |        | 0.65   | 0.12   | -5.78   |        |
| Qatar                    | (0.09,   | (0.25,  | (-1.77, | <0.001 | (12.40,  | (9.98,   | (-1.63, | <0.001 | (30.95,  | (6.31,   | (-6.07, | <0.001 | (0.01, | (0.00, | (-6.34, | <0.001 |
|                          | 6.42)    | 1.98)   | -1.36)  |        | 28.27)   | 14.90)   | -1.40)  |        | 55.84)   | 10.91)   | -5.17)  |        | 6.07)  | 1.39)  | -5.21)  |        |
|                          | 0.39     | 0.31    | -0.79   |        | 9.70     | 9.24     | -0.15   |        | 9.90     | 2.31     | -4.87   |        | 0.15   | 0.03   | -5.35   |        |
| Republic of Korea        | (0.28,   | (0.21,  | (-0.96, | <0.001 | (9.12,   | (8.63,   | (-0.21, | <0.001 | (9.31,   | (2.01,   | (-5.17, | <0.001 | (0.09, | (0.01, | (-6.72, | <0.001 |
|                          | 0.53)    | 0.45)   | -0.61)  |        | 10.31)   | 9.90)    | -0.09)  |        | 10.52)   | 2.64)    | -4.56)  |        | 0.25)  | 0.10)  | -3.95)  |        |
|                          | 9.45     | 2.88    | -4.03   |        | 60.16    | 23.90    | -3.15   |        | 234.44   | 35.48    | -6.53   |        | 3.96   | 0.58   | -6.55   |        |
| Republic of<br>Moldova   | (7.57,   | (1.81,  | (-4.17, | <0.001 | (55.17,  | (20.41,  | (-3.29, | <0.001 | (224.41, | (31.18,  | (-7.02, | <0.001 | (2.75, | (0.16, | (-7.06, | <0.001 |
|                          | 11.70)   | 4.51)   | -3.88)  |        | 65.50)   | 27.90)   | -3.02)  |        | 244.84)  | 40.28)   | -6.03)  |        | 5.54)  | 1.65)  | -6.04)  |        |
|                          | 4.03     | 1.67    | -3.02   |        | 26.09    | 14.55    | -2.03   |        | 124.82   | 16.56    | -6.75   |        | 2.17   | 0.27   | -6.98   |        |
| Romania                  | (3.46,   | (1.25,  | (-3.20, | <0.001 | (24.61,  | (13.22,  | (-2.33, | <0.001 | (121.55, | (15.13,  | (-7.58, | <0.001 | (1.76, | (0.12, | (-7.84, | <0.001 |
|                          | 4.67)    | 2.19)   | -2.84)  |        | 27.64)   | 15.98)   | -1.74)  |        | 128.17)  | 18.10)   | -5.92)  |        | 2.65)  | 0.54)  | -6.12)  |        |
|                          | 7.41     | 3.46    | -2.59   |        | 54.79    | 36.82    | -1.35   |        | 108.16   | 15.84    | -6.57   |        | 1.85   | 0.25   | -6.87   |        |
| Russian Federation       | (7.11,   | (3.23,  | (-2.71, | <0.001 | (53.96,  | (36.06,  | (-1.49, | <0.001 | (107.01, | (15.36,  | (-8.23, | <0.001 | (1.70, | (0.19, | (-8.64, | <0.001 |
|                          | 7.71)    | 3.70)   | -2.47)  |        | 55.62)   | 37.60)   | -1.21)  |        | 109.32)  | 16.33)   | -4.87)  |        | 2.00)  | 0.32)  | -5.07)  |        |
|                          | 105.49   | 103.04  | -0.08   |        | 1715.72  | 1715.87  | 0.00    |        | 221.31   | 119.33   | -2.12   |        | 2.17   | 0.59   | -4.34   |        |
| Rwanda                   | (100.15, | (99.28, | (-0.10, | <0.001 | (1693.34 | (1700.06 | (-0.01, | 0.961  | (213.51, | (115.22, | (-2.23, | <0.001 | (1.46, | (0.34, | (-4.56, | <0.001 |
|                          | 111.07)  | 106.91) | -0.06)  |        | ,        | ,        | 0.01)   |        | 229.36)  | 123.56)  | -2.00)  |        | 3.13)  | 0.98)  | -4.13)  |        |
|                          |          |         |         |        | 1738.34) | 1731.79) |         |        |          |          |         |        |        |        |         |        |
|                          | 1.91     | 0.84    | -2.82   |        | 23.77    | 15.30    | -1.53   |        | 74.27    | 23.04    | -3.37   |        | 1.26   | 0.36   | -2.76   |        |
| Saint Kitts and<br>Nevis | (0.00,   | (0.00,  | (-2.98, | <0.001 | (2.81,   | (1.47,   | (-1.64, | <0.001 | (27.26,  | (3.99,   | (-4.65, | <0.001 | (0.00, | (0.00, | (-5.00, | 0.018  |
|                          | 55.90)   | 38.12)  | -2.67)  |        | 91.92)   | 62.68)   | -1.43)  |        | 165.11)  | 74.85)   | -2.07)  |        | 54.71) | 37.22) | -0.47)  |        |
|                          | 68.81    | 66.81   | -0.10   |        | 1186.57  | 1173.10  | -0.04   |        | 159.84   | 99.21    | -1.68   |        | 1.75   | 0.72   | -3.09   |        |
| Saint Lucia              | (41.58,  | (42.02, | (-0.12, | <0.001 | (1057.72 | (1060.64 | (-0.06, | <0.001 | (114.01, | (68.60,  | (-1.98, | <0.001 | (0.00, | (0.00, | (-4.02, | <0.001 |

|                                  |         |         |         |        |          |          |         |        |          |          |         |        |        |        |         |        |
|----------------------------------|---------|---------|---------|--------|----------|----------|---------|--------|----------|----------|---------|--------|--------|--------|---------|--------|
|                                  | 109.82) | 101.15) | -0.09)  |        | ,        | ,        | -0.03)  |        | 219.64)  | 139.15)  | -1.38)  |        | 22.45) | 13.17) | -2.16)  |        |
|                                  |         |         |         |        | 1328.39) | 1294.50) |         |        |          |          |         |        |        |        |         |        |
|                                  |         |         |         |        | 1180.17  | 1156.36  |         |        |          |          |         |        |        |        |         |        |
| Saint Vincent and the Grenadines | 69.24   | 66.65   | -0.13   |        | (1041.35 | (1016.27 | -0.08   |        | 210.42   | 127.64   | -1.58   |        | 2.59   | 1.21   | -2.42   |        |
|                                  | (39.94, | (36.65, | (-0.15, | <0.001 |          |          | (-0.12, | <0.001 | (153.34, | (84.17,  | (-2.33, | <0.001 | (0.00, | (0.00, | (-3.67, | <0.001 |
|                                  | 115.22) | 111.83) | -0.12)  |        | ,        | ,        | -0.04)  |        | 284.03)  | 186.00)  | -0.82)  |        | 27.78) | 20.77) | -1.16)  |        |
|                                  |         |         |         |        | 1334.45) | 1310.68) |         |        |          |          |         |        |        |        |         |        |
| Samoa                            | 39.29   | 39.41   | 0.01    |        | 744.37   | 759.69   | 0.07    |        | 391.22   | 306.07   | -0.84   |        | 5.87   | 4.44   | -0.94   |        |
|                                  | (20.82, | (22.65, | (-0.03, | 0.740  | (653.69, | (677.89, | (0.07,  | <0.001 | (325.29, | (254.63, | (-0.96, | <0.001 | (0.59, | (0.44, | (-1.08, | <0.001 |
|                                  | 69.97)  | 64.68)  | 0.04)   |        | 845.84)  | 849.32)  | 0.08)   |        | 468.25)  | 365.51)  | -0.73)  |        | 25.94) | 18.52) | -0.81)  |        |
|                                  | 0.46    | 0.41    | -0.34   |        | 6.87     | 6.58     | -0.14   |        | 8.01     | 6.58     | -0.66   |        | 0.13   | 0.11   | -0.51   |        |
| San Marino                       | (0.00,  | (0.00,  | (-0.61, | 0.013  | (0.00,   | (0.00,   | (-0.16, | <0.001 | (0.00,   | (0.00,   | (-0.77, | <0.001 | (0.00, | (0.00, | (-0.75, | <0.001 |
|                                  | 86.69)  | 79.15)  | -0.07)  |        | 99.14)   | 91.09)   | -0.14)  |        | 101.27)  | 91.04)   | -0.54)  |        | 86.04) | 78.55) | -0.26)  |        |
|                                  |         |         |         |        | 1183.19  | 1276.77  |         |        |          |          |         |        |        |        |         |        |
| Sao Tome and Principe            | 67.12   | 71.13   | 0.20    |        | (1032.64 | (1171.98 | 0.26    |        | 113.24   | 105.04   | -0.24   |        | 0.95   | 0.70   | -1.09   |        |
|                                  | (36.62, | (48.53, | (0.17,  | <0.001 |          |          | (0.23,  | <0.001 | (69.50,  | (76.75,  | (-0.56, | 0.125  | (0.00, | (0.00, | (-1.65, | <0.001 |
|                                  | 118.54) | 101.16) | 0.22)   |        | ,        | ,        | 0.28)   |        | 178.26)  | 140.77)  | 0.07)   |        | 31.48) | 11.01) | -0.52)  |        |
|                                  |         |         |         |        | 1352.77) | 1388.74) |         |        |          |          |         |        |        |        |         |        |
|                                  | 1.13    | 0.81    | -1.15   |        | 15.78    | 12.58    | -0.79   |        | 41.49    | 14.14    | -3.65   |        | 0.69   | 0.23   | -3.70   |        |
| Saudi Arabia                     | (0.81,  | (0.65,  | (-1.26, | <0.001 | (14.54,  | (11.92,  | (-0.87, | <0.001 | (39.45,  | (13.46,  | (-3.93, | <0.001 | (0.45, | (0.15, | (-4.30, | <0.001 |
|                                  | 1.53)   | 1.00)   | -1.04)  |        | 17.10)   | 13.29)   | -0.70)  |        | 43.60)   | 14.86)   | -3.37)  |        | 1.02)  | 0.35)  | -3.10)  |        |
|                                  |         |         |         |        | 1189.13  | 1229.12  |         |        |          |          |         |        |        |        |         |        |
| Senegal                          | 72.13   | 73.82   | 0.07    |        | (1169.90 | (1216.38 | 0.13    |        | 113.86   | 89.95    | -0.86   |        | 0.91   | 0.50   | -1.92   |        |
|                                  | (67.61, | (70.82, | (0.04,  | <0.001 |          |          | (0.06,  | <0.001 | (108.02, | (86.53,  | (-1.08, | <0.001 | (0.46, | (0.28, | (-2.48, | <0.001 |
|                                  | 76.91)  | 76.92)  | 0.10)   |        | ,        | ,        | 0.19)   |        | 119.97)  | 93.48)   | -0.63)  |        | 1.67)  | 0.85)  | -1.37)  |        |
|                                  |         |         |         |        | 1208.63) | 1241.97) |         |        |          |          |         |        |        |        |         |        |
|                                  | 1.07    | 1.29    | 0.62    |        | 8.40     | 9.84     | 0.50    |        | 13.93    | 3.96     | -4.22   |        | 0.23   | 0.06   | -4.46   |        |
| Serbia                           | (0.66,  | (0.79,  | (0.37,  | <0.001 | (7.12,   | (8.33,   | (0.38,  | <0.001 | (12.25,  | (3.02,   | (-4.80, | <0.001 | (0.06, | (0.00, | (-5.04, | <0.001 |
|                                  | 1.68)   | 2.01)   | 0.88)   |        | 9.85)    | 11.56)   | 0.62)   |        | 15.78)   | 5.12)    | -3.64)  |        | 0.60)  | 0.40)  | -3.88)  |        |
|                                  | 38.07   | 36.02   | -0.19   |        | 658.79   | 635.94   | -0.12   |        | 184.49   | 58.93    | -3.75   |        | 2.58   | 0.47   | -5.58   |        |
| Seychelles                       | (14.06, | (14.74, | (-0.21, | <0.001 | (537.58, | (532.49, | (-0.13, | <0.001 | (122.63, | (30.84,  | (-4.07, | <0.001 | (0.00, | (0.00, | (-6.25, | <0.001 |
|                                  | 86.06)  | 75.61)  | -0.17)  |        | 801.18)  | 755.27)  | -0.12)  |        | 268.71)  | 104.39)  | -3.42)  |        | 34.33) | 23.50) | -4.90)  |        |
|                                  |         |         |         |        | 1173.10  | 1242.28  |         |        |          |          |         |        |        |        |         |        |
| Sierra Leone                     | 75.56   | 79.48   | 0.18    |        | (1146.37 | (1225.24 | 0.21    |        | 121.88   | 96.28    | -0.79   |        | 1.06   | 0.60   | -1.95   |        |
|                                  | (69.01, | (75.33, | (0.17,  | <0.001 |          |          | (0.19,  | <0.001 | (113.43, | (91.59,  | (-0.97, | <0.001 | (0.41, | (0.28, | (-2.18, | <0.001 |
|                                  | 82.59)  | 83.83)  | 0.19)   |        | ,        | ,        | 0.22)   |        | 130.83)  | 101.17)  | -0.62)  |        | 2.28)  | 1.14)  | -1.73)  |        |
|                                  |         |         |         |        | 1200.32) | 1259.52) |         |        |          |          |         |        |        |        |         |        |

|                 |          |          |         |        |          |          |         |        |          |          |         |        |        |        |         |        |
|-----------------|----------|----------|---------|--------|----------|----------|---------|--------|----------|----------|---------|--------|--------|--------|---------|--------|
|                 | 0.92     | 0.34     | -3.38   |        | 15.96    | 10.08    | -1.60   |        | 35.21    | 4.89     | -6.44   |        | 0.59   | 0.07   | -7.08   |        |
| Singapore       | (0.37,   | (0.08,   | (-3.77, | <0.001 | (13.26,  | (8.18,   | (-1.77, | <0.001 | (31.15,  | (3.60,   | (-6.99, | <0.001 | (0.18, | (0.00, | (-9.48, | <0.001 |
|                 | 1.93)    | 1.06)    | -2.99)  |        | 19.07)   | 12.36)   | -1.44)  |        | 39.68)   | 6.57)    | -5.89)  |        | 1.47)  | 0.69)  | -4.62)  |        |
|                 | 1.66     | 1.84     | 0.38    |        | 14.51    | 16.25    | 0.38    |        | 19.92    | 7.41     | -3.49   |        | 0.33   | 0.11   | -3.72   |        |
| Slovakia        | (0.99,   | (1.11,   | (0.24,  | <0.001 | (12.32,  | (13.84,  | (0.34,  | <0.001 | (17.34,  | (5.82,   | (-3.98, | <0.001 | (0.08, | (0.00, | (-4.66, | <0.001 |
|                 | 2.64)    | 2.97)    | 0.52)   |        | 16.99)   | 19.04)   | 0.42)   |        | 22.78)   | 9.39)    | -2.99)  |        | 0.93)  | 0.76)  | -2.78)  |        |
|                 | 1.13     | 1.04     | -0.33   |        | 7.49     | 7.69     | 0.05    |        | 19.78    | 5.84     | -4.12   |        | 0.34   | 0.10   | -4.20   |        |
| Slovenia        | (0.36,   | (0.27,   | (-0.54, | 0.003  | (5.09,   | (5.01,   | (-0.05, | 0.314  | (15.76,  | (3.59,   | (-5.15, | <0.001 | (0.02, | (0.00, | (-6.11, | <0.001 |
|                 | 2.81)    | 3.17)    | -0.11)  |        | 10.72)   | 11.53)   | 0.15)   |        | 24.58)   | 9.26)    | -3.09)  |        | 1.67)  | 1.84)  | -2.25)  |        |
|                 | 44.66    | 44.52    | -0.00   |        | 704.79   | 715.08   | 0.05    |        | 944.65   | 718.25   | -0.94   |        | 15.38  | 11.52  | -0.99   |        |
| Solomon Islands | (29.38,  | (33.70,  | (-0.02, | 0.953  | (639.61, | (669.59, | (0.05,  | <0.001 | (866.31, | (671.85, | (-1.05, | <0.001 | (6.84, | (6.31, | (-1.11, | <0.001 |
|                 | 65.92)   | 57.84)   | 0.02)   |        | 775.48)  | 762.96)  | 0.06)   |        | 1028.70) | 767.10)  | -0.83)  |        | 30.52) | 19.41) | -0.88)  |        |
|                 | 113.70   | 119.00   | 0.14    |        | 1756.89  | 1843.41  | 0.17    |        | 217.12   | 179.46   | -0.63   |        | 2.09   | 1.43   | -1.26   |        |
| Somalia         | (107.96, | (115.72, | (0.08,  | <0.001 | (1733.23 | (1829.87 | (0.15,  | <0.001 | (209.15, | (175.37, | (-0.76, | <0.001 | (1.38, | (1.09, | (-1.48, | <0.001 |
|                 | 119.71)  | 122.37)  | 0.21)   |        | '        | '        | 0.19)   |        | 225.35)  | 183.63)  | -0.50)  |        | 3.06)  | 1.85)  | -1.05)  |        |
|                 | 93.19    | 94.15    | 0.03    |        | 1603.20  | 1635.77  | 0.07    |        | 164.93   | 114.20   | -1.29   |        | 1.51   | 0.61   | -3.13   |        |
| South Africa    | (91.07,  | (92.39,  | (-0.01, | 0.097  | (1594.19 | (1628.55 | (0.06,  | <0.001 | (162.00, | (112.31, | (-1.65, | <0.001 | (1.24, | (0.48, | (-3.93, | <0.001 |
|                 | 95.35)   | 95.92)   | 0.07)   |        | '        | '        | 0.07)   |        | 167.90)  | 116.12)  | -0.93)  |        | 1.83)  | 0.77)  | -2.33)  |        |
|                 | 85.88    | 88.13    | 0.09    |        | 1581.86  | 1630.41  | 0.11    |        | 132.19   | 108.87   | -0.61   |        | 0.91   | 0.49   | -2.03   |        |
| South Sudan     | (80.86,  | (83.62,  | (0.07,  | <0.001 | (1559.00 | (1609.60 | (0.10,  | <0.001 | (125.73, | (103.65, | (-0.83, | <0.001 | (0.45, | (0.21, | (-2.91, | <0.001 |
|                 | 91.19)   | 92.84)   | 0.11)   |        | '        | '        | 0.12)   |        | 138.95)  | 114.29)  | -0.39)  |        | 1.71)  | 1.02)  | -1.14)  |        |
|                 | 0.74     | 0.41     | -2.05   |        | 8.10     | 6.31     | -0.85   |        | 27.81    | 6.10     | -5.11   |        | 0.47   | 0.10   | -5.46   |        |
| Spain           | (0.56,   | (0.28,   | (-2.19, | <0.001 | (7.47,   | (5.72,   | (-0.94, | <0.001 | (26.62,  | (5.53,   | (-5.65, | <0.001 | (0.32, | (0.04, | (-6.00, | <0.001 |
|                 | 0.97)    | 0.60)    | -1.91)  |        | 8.78)    | 6.95)    | -0.77)  |        | 29.04)   | 6.72)    | -4.56)  |        | 0.65)  | 0.21)  | -4.92)  |        |
|                 | 2.15     | 1.49     | -1.22   |        | 21.64    | 20.42    | -0.19   |        | 73.89    | 18.44    | -4.69   |        | 1.21   | 0.29   | -4.72   |        |
| Sri Lanka       | (1.69,   | (1.14,   | (-1.40, | <0.001 | (20.15,  | (19.04,  | (-0.27, | <0.001 | (71.13,  | (17.12,  | (-6.49, | <0.001 | (0.88, | (0.15, | (-6.49, | <0.001 |
|                 | 2.69)    | 1.92)    | -1.05)  |        | 23.21)   | 21.88)   | -0.11)  |        | 76.74)   | 19.83)   | -2.86)  |        | 1.63)  | 0.51)  | -2.91)  |        |
|                 | 51.05    | 52.22    | 0.07    |        | 706.66   | 745.29   | 0.18    |        | 136.81   | 73.26    | -2.14   |        | 1.72   | 0.62   | -3.43   |        |
| Sudan           | (48.76,  | (50.70,  | (0.01,  | 0.026  | (697.81, | (739.34, | (0.15,  | <0.001 | (132.91, | (71.39,  | (-2.25, | <0.001 | (1.30, | (0.46, | (-3.60, | <0.001 |
|                 | 53.42)   | 53.78)   | 0.14)   |        | 715.59)  | 751.27)  | 0.22)   |        | 140.80)  | 75.16)   | -2.03)  |        | 2.23)  | 0.83)  | -3.26)  |        |

|                            |         |         |         |        |          |          |         |        |          |          |         |        |         |         |         |        |
|----------------------------|---------|---------|---------|--------|----------|----------|---------|--------|----------|----------|---------|--------|---------|---------|---------|--------|
|                            | 66.82   | 65.36   | -0.09   |        | 1107.76  | 1104.87  | -0.02   |        | 131.35   | 89.95    | -1.28   |        | 1.30    | 0.62    | -2.49   |        |
| Suriname                   | (50.54, | (50.94, | (-0.11, | <0.001 | (1035.63 | (1042.58 | (-0.04, | 0.119  | (107.09, | (72.83,  | (-2.13, | 0.003  | (0.03,  | (0.00,  | (-4.33, | 0.010  |
|                            | 87.51)  | 82.67)  | -0.06)  |        | ,        | ,        | 0.00)   |        | 160.09)  | 109.95)  | -0.43)  |        | 8.74)   | 4.84)   | -0.61)  |        |
|                            |         |         |         |        | 1184.17) | 1169.97) |         |        |          |          |         |        |         |         |         |        |
|                            | 0.28    | 0.25    | -0.44   |        | 4.78     | 4.45     | -0.28   |        | 4.75     | 1.81     | -3.33   |        | 0.07    | 0.03    | -2.97   |        |
| Sweden                     | (0.08,  | (0.07,  | (-0.97, | 0.111  | (3.74,   | (3.49,   | (-0.46, | 0.002  | (3.72,   | (1.22,   | (-4.10, | <0.001 | (0.00,  | (0.00,  | (-4.77, | 0.002  |
|                            | 0.72)   | 0.65)   | 0.10)   |        | 6.03)    | 5.61)    | -0.10)  |        | 5.99)    | 2.60)    | -2.55)  |        | 0.41)   | 0.32)   | -1.13)  |        |
|                            | 0.57    | 0.46    | -0.76   |        | 9.07     | 8.45     | -0.28   |        | 9.72     | 1.84     | -5.78   |        | 0.16    | 0.02    | -7.22   |        |
| Switzerland                | (0.25,  | (0.19,  | (-1.07, | <0.001 | (7.54,   | (7.01,   | (-0.39, | <0.001 | (8.15,   | (1.22,   | (-6.47, | <0.001 | (0.02,  | (0.00,  | (-8.45, | <0.001 |
|                            | 1.18)   | 1.02)   | -0.45)  |        | 10.85)   | 10.14)   | -0.18)  |        | 11.53)   | 2.72)    | -5.10)  |        | 0.61)   | 0.40)   | -5.97)  |        |
|                            | 43.82   | 45.21   | 0.10    |        | 689.96   | 716.42   | 0.13    |        | 237.39   | 57.99    | -4.72   |        | 3.43    | 0.39    | -7.15   |        |
| Syrian Arab Republic       | (41.22, | (42.40, | (0.09,  | <0.001 | (679.07, | (704.61, | (0.12,  | <0.001 | (230.93, | (54.70,  | (-5.11, | <0.001 | (2.68,  | (0.17,  | (-7.69, | <0.001 |
|                            | 46.56)  | 48.18)  | 0.11)   |        | 701.01)  | 728.40)  | 0.14)   |        | 243.99)  | 61.45)   | -4.32)  |        | 4.34)   | 0.83)   | -6.62)  |        |
|                            | 1.62    | 1.76    | 0.28    |        | 17.41    | 28.81    | 1.75    |        | 31.86    | 5.82     | -5.79   |        | 0.53    | 0.07    | -6.88   |        |
| Taiwan (Province of China) | (1.28,  | (1.39,  | (0.23,  | <0.001 | (16.25,  | (27.19,  | (1.64,  | <0.001 | (30.28,  | (5.11,   | (-6.24, | <0.001 | (0.34,  | (0.02,  | (-7.49, | <0.001 |
|                            | 2.03)   | 2.20)   | 0.33)   |        | 18.65)   | 30.50)   | 1.86)   |        | 33.51)   | 6.60)    | -5.34)  |        | 0.78)   | 0.24)   | -6.25)  |        |
|                            | 60.73   | 63.22   | 0.14    |        | 1010.55  | 1028.45  | 0.06    |        | 283.59   | 135.60   | -2.41   |        | 4.00    | 1.46    | -3.31   |        |
| Tajikistan                 | (56.15, | (59.84, | (0.11,  | <0.001 | (990.96, | (1014.59 | (0.05,  | <0.001 | (272.96, | (130.57, | (-2.90, | <0.001 | (2.81,  | (0.98,  | (-3.93, | <0.001 |
|                            | 65.64)  | 66.75)  | 0.16)   |        | 1030.47) | ,        | 0.08)   |        | 294.55)  | 140.79)  | -1.92)  |        | 5.56)   | 2.11)   | -2.68)  |        |
|                            | 38.83   | 36.36   | -0.22   |        | 587.65   | 571.04   | -0.10   |        | 202.42   | 40.60    | -5.41   |        | 2.99    | 0.21    | -8.72   |        |
| Thailand                   | (37.76, | (35.27, | (-0.24, | <0.001 | (583.43, | (566.77, | (-0.14, | <0.001 | (199.91, | (39.47,  | (-5.91, | <0.001 | (2.69,  | (0.14,  | (-9.77, | <0.001 |
|                            | 39.93)  | 37.47)  | -0.21)  |        | 591.88)  | 575.34)  | -0.07)  |        | 204.96)  | 41.76)   | -4.90)  |        | 3.32)   | 0.32)   | -7.66)  |        |
|                            | 41.07   | 40.60   | -0.04   |        | 623.46   | 638.69   | 0.08    |        | 139.50   | 112.42   | -0.73   |        | 1.83    | 1.31    | -1.14   |        |
| Timor-Leste                | (31.86, | (33.21, | (-0.06, | <0.001 | (585.34, | (607.20, | (0.06,  | <0.001 | (121.68, | (99.74,  | (-1.67, | 0.134  | (0.35,  | (0.29,  | (-2.04, | 0.013  |
|                            | 52.34)  | 49.40)  | -0.03)  |        | 663.57)  | 671.58)  | 0.10)   |        | 159.38)  | 126.49)  | 0.22)   |        | 5.81)   | 4.12)   | -0.24)  |        |
|                            | 75.21   | 78.48   | 0.15    |        | 1169.54  | 1229.85  | 0.17    |        | 115.04   | 95.04    | -0.65   |        | 0.95    | 0.59    | -1.62   |        |
| Togo                       | (68.69, | (74.14, | (0.13,  | <0.001 | (1142.39 | (1212.04 | (0.16,  | <0.001 | (106.71, | (90.14,  | (-0.76, | <0.001 | (0.34,  | (0.26,  | (-1.82, | <0.001 |
|                            | 82.28)  | 83.03)  | 0.17)   |        | ,        | ,        | 0.18)   |        | 123.93)  | 100.15)  | -0.53)  |        | 2.24)   | 1.16)   | -1.42)  |        |
|                            | 7.26    | 4.67    | -1.51   |        | 1197.25) | 1247.87) |         |        |          |          |         |        |         |         |         |        |
| Tokelau                    | (0.00,  | (0.00,  | (-1.55, | <0.001 | (0.00,   | (0.00,   | (-0.47, | <0.001 | (7.93,   | (0.20,   | (-1.87, | <0.001 | (0.00,  | (0.00,  | (-1.92, | <0.001 |
|                            | 1597.61 | 1808.48 | -1.47)  |        | 1717.83) | 1921.27) | -0.24)  |        | 2189.68) | 2165.30) | -1.77)  |        | 1594.50 | 1805.99 | -1.82)  |        |

|                         |          |          |         |        |          |          |         |        |          |          |         |        |         |         |         |        |
|-------------------------|----------|----------|---------|--------|----------|----------|---------|--------|----------|----------|---------|--------|---------|---------|---------|--------|
|                         | )        | )        |         |        |          |          |         |        |          |          | )       | )      |         |         |         |        |
|                         | 49.01    | 48.74    | -0.01   |        | 1067.68  | 1087.48  | 0.09    |        | 161.00   | 136.65   | -0.57   |        | 1.81    | 1.36    | -0.93   |        |
| Tonga                   | (21.38,  | (22.18,  | (-0.06, | 0.741  | (915.93, | (941.04, | (0.04,  | 0.002  | (105.10, | (88.43,  | (-0.78, | <0.001 | (0.00,  | (0.00,  | (-1.19, | <0.001 |
|                         | 102.23)  | 94.91)   | 0.04)   |        | 1241.21) | 1251.55) | 0.15)   |        | 240.64)  | 203.44)  | -0.36)  |        | 37.07)  | 26.96)  | -0.66)  |        |
|                         |          |          |         |        | 1149.45  | 1137.67  |         |        | 174.81   | 97.55    | -2.01   |        | 1.99    | 0.72    | -3.56   |        |
| Trinidad and<br>Tobago  | 66.86    | 63.70    | -0.17   |        | (1107.85 | (1096.41 | -0.04   |        | (158.82, | (85.81,  | (-2.83, | <0.001 | (0.64,  | (0.08,  | (-5.14, | <0.001 |
|                         | (57.19,  | (53.96,  | (-0.20, | <0.001 | ,        | ,        | (-0.05, | <0.001 | (192.04) | 110.55)  | -1.18)  |        | 4.76)   | 2.94)   | -1.96)  |        |
|                         | 77.77)   | 74.76)   | -0.15)  |        | 1192.26) | 1180.17) | -0.02)  |        |          |          |         |        |         |         |         |        |
|                         | 0.85     | 0.72     | -0.55   |        | 12.95    | 11.61    | -0.37   |        | 32.69    | 13.21    | -3.09   |        | 0.53    | 0.21    | -3.19   |        |
| Tunisia                 | (0.45,   | (0.41,   | (-0.67, | <0.001 | (11.27,  | (10.23,  | (-0.43, | <0.001 | (29.98,  | (11.74,  | (-3.17, | <0.001 | (0.24,  | (0.07,  | (-3.40, | <0.001 |
|                         | 1.47)    | 1.18)    | -0.43)  |        | 14.84)   | 13.14)   | -0.32)  |        | 35.61)   | 14.83)   | -3.00)  |        | 1.06)   | 0.52)   | -2.99)  |        |
|                         | 0.79     | 0.64     | -0.71   |        | 11.93    | 11.32    | -0.16   |        | 11.55    | 4.27     | -3.26   |        | 0.19    | 0.06    | -3.87   |        |
| Turkey                  | (0.64,   | (0.53,   | (-0.85, | <0.001 | (11.32,  | (10.83,  | (-0.24, | <0.001 | (10.95,  | (3.98,   | (-3.70, | <0.001 | (0.12,  | (0.03,  | (-5.29, | <0.001 |
|                         | 0.98)    | 0.77)    | -0.57)  |        | 12.56)   | 11.82)   | -0.08)  |        | 12.18)   | 4.59)    | -2.81)  |        | 0.28)   | 0.11)   | -2.42)  |        |
|                         | 61.04    | 59.41    | -0.10   |        | 990.26   | 992.73   | 0.01    |        | 254.32   | 142.66   | -2.05   |        | 3.43    | 1.58    | -2.72   |        |
| Turkmenistan            | (55.67,  | (54.87,  | (-0.12, | <0.001 | (967.72, | (974.08, | (-0.00, | 0.080  | (242.86, | (135.64, | (-3.24, | 0.001  | (2.21,  | (0.93,  | (-4.08, | <0.001 |
|                         | 66.84)   | 64.25)   | -0.08)  |        | 1013.25) | 1011.67) | 0.02)   |        | 266.22)  | 149.96)  | -0.85)  |        | 5.15)   | 2.54)   | -1.34)  |        |
|                         | 10.53    | 7.34     | -1.24   |        | 77.06    | 73.11    | -0.19   |        | 626.28   | 412.49   | -1.43   |        | 10.34   | 6.79    | -1.44   |        |
| Tuvalu                  | (0.00,   | (0.00,   | (-1.29, | <0.001 | (3.94,   | (7.77,   | (-0.25, | <0.001 | (305.83, | (201.00, | (-1.53, | <0.001 | (0.00,  | (0.00,  | (-1.54, | <0.001 |
|                         | 266.99)  | 179.50)  | -1.19)  |        | 381.66)  | 289.54)  | -0.13)  |        | 1149.13) | 759.04)  | -1.34)  |        | 266.32) | 178.26) | -1.34)  |        |
|                         | 116.93   | 111.79   | -0.15   |        | 1877.27  | 2061.95  |         |        | 154.93   | 137.49   | -0.44   |        | 1.03    | 0.61    | -1.91   |        |
| Uganda                  | (113.20, | (109.50, | (-0.16, | <0.001 | (1861.53 | (2051.55 | 0.32    |        | (150.52, | (134.86, | (-0.64, | <0.001 | (0.71,  | (0.45,  | (-2.41, | <0.001 |
|                         | 120.78)  | 114.13)  | -0.14)  |        | ,        | ,        | (0.26,  | <0.001 | (159.45) | 140.17)  | -0.23)  |        | 1.49)   | 0.81)   | -1.40)  |        |
|                         |          |          |         |        | 1893.12) | 2072.39) | 0.39)   |        |          |          |         |        |         |         |         |        |
|                         | 3.19     | 2.72     | -0.51   |        | 24.54    | 23.22    | -0.15   |        | 30.18    | 36.94    | 0.75    |        | 0.50    | 0.62    | 0.76    |        |
| Ukraine                 | (2.85,   | (2.37,   | (-0.76, | <0.001 | (23.57,  | (22.15,  | (-0.32, | 0.081  | (29.10,  | (35.59,  | (-1.01, | 0.405  | (0.37,  | (0.46,  | (-1.20, | 0.449  |
|                         | 3.56)    | 3.10)    | -0.26)  |        | 25.54)   | 24.34)   | 0.02)   |        | 31.29)   | 38.34)   | 2.55)   |        | 0.67)   | 0.83)   | 2.76)   |        |
|                         | 37.36    | 38.92    | 0.14    |        | 686.49   | 691.88   | 0.03    |        | 89.06    | 60.56    | -1.32   |        | 0.95    | 0.47    | -2.41   |        |
| United Arab<br>Emirates | (32.17,  | (35.47,  | (0.12,  | <0.001 | (665.30, | (678.57, | (0.00,  | 0.037  | (81.79,  | (56.85,  | (-1.51, | <0.001 | (0.36,  | (0.22,  | (-2.70, | <0.001 |
|                         | 43.31)   | 42.66)   | 0.17)   |        | 708.36)  | 705.45)  | 0.06)   |        | 97.01)   | 64.51)   | -1.13)  |        | 2.45)   | 1.03)   | -2.12)  |        |
|                         | 0.49     | 0.37     | -0.92   |        | 7.39     | 6.48     | -0.44   |        | 8.23     | 3.82     | -2.65   |        | 0.13    | 0.06    | -2.64   |        |
| United Kingdom          | (0.36,   | (0.27,   | (-1.11, | <0.001 | (6.87,   | (6.01,   | (-0.50, | <0.001 | (7.69,   | (3.47,   | (-2.93, | <0.001 | (0.07,  | (0.02,  | (-3.58, | <0.001 |
|                         | 0.64)    | 0.51)    | -0.72)  |        | 7.93)    | 6.97)    | -0.38)  |        | 8.80)    | 4.19)    | -2.37)  |        | 0.23)   | 0.13)   | -1.69)  |        |



|                                          |         |          |         |          |          |          |         |        |          |          |         |        |        |        |         |        |
|------------------------------------------|---------|----------|---------|----------|----------|----------|---------|--------|----------|----------|---------|--------|--------|--------|---------|--------|
| United Republic of<br>Tanzania           | 102.09  | 104.02   | 0.08    |          | 1695.35  | 1783.78  | 0.18    |        | 146.42   | 114.37   | -0.85   | 1.02   | 0.45   | -2.76  |         |        |
|                                          | (99.21, | (102.11, | (0.01,  | 0.020    | (1683.05 | (1775.54 | (0.16,  | <0.001 | (142.92, | (112.32, | (-0.93, | <0.001 | (0.75, | (0.33, | (-2.93, | <0.001 |
|                                          | 105.04) | 105.97)  | 0.15)   |          | ,        | ,        | 0.20)   |        | 150.00)  | 116.45)  | -0.76)  |        | 1.37)  | 0.60)  | -2.58)  |        |
|                                          |         |          |         |          | 1707.72) | 1792.05) |         |        |          |          |         |        |        |        |         |        |
| United States of<br>America              | 1.56    | 1.02     | -1.43   |          | 25.25    | 17.58    | -1.23   |        | 15.48    | 5.97     | -3.21   | 0.24   | 0.08   | -3.74  |         |        |
|                                          | (1.46,  | (0.94,   | (-1.53, | <0.001   | (24.82,  | (17.24,  | (-1.26, | <0.001 | (15.15,  | (5.77,   | (-3.83, | <0.001 | (0.20, | (0.06, | (-4.55, | <0.001 |
|                                          | 1.67)   | 1.11)    | -1.33)  |          | 25.69)   | 17.93)   | -1.19)  |        | 15.82)   | 6.18)    | -2.58)  |        | 0.29)  | 0.11)  | -2.92)  |        |
| United States<br>Virgin Islands          | 1.13    | 0.98     | -0.48   |          | 20.56    | 17.93    | -0.51   |        | 62.80    | 21.63    | -3.54   | 1.02   | 0.35   | -3.59  |         |        |
|                                          | (0.00,  | (0.00,   | (-0.63, | <0.001   | (5.38,   | (3.14,   | (-0.67, | <0.001 | (32.15,  | (4.74,   | (-4.86, | <0.001 | (0.00, | (0.00, | (-5.26, | <0.001 |
|                                          | 23.87)  | 29.59)   | -0.33)  |          | 54.79)   | 57.65)   | -0.35)  |        | 111.27)  | 63.05)   | -2.20)  |        | 23.67) | 28.38) | -1.88)  |        |
| Uruguay                                  | 1.36    | 1.43     | 0.22    |          | 18.04    | 20.46    | 0.45    |        | 24.27    | 13.79    | -1.77   | 0.41   | 0.22   | -1.91  |         |        |
|                                          | (0.57,  | (0.64,   | (0.10,  | <0.001   | (14.69,  | (17.00,  | (0.42,  | <0.001 | (20.35,  | (10.99,  | (-2.78, | 0.001  | (0.06, | (0.01, | (-3.06, | 0.001  |
|                                          | 2.74)   | 2.76)    | 0.34)   |          | 21.93)   | 24.42)   | 0.48)   |        | 28.74)   | 17.10)   | -0.74)  |        | 1.39)  | 1.03)  | -0.75)  |        |
| Uzbekistan                               | 60.40   | 62.93    | 0.14    |          | 966.83   | 1035.13  | 0.24    |        | 382.00   | 186.70   | -2.34   | 5.67   | 2.31   | -2.94  |         |        |
|                                          | (58.11, | (61.10,  | (0.10,  | <0.001   | (957.43, | (1027.71 | (0.22,  | <0.001 | (376.01, | (183.55, | (-3.42, | <0.001 | (4.96, | (1.97, | (-4.19, | <0.001 |
|                                          | 62.76)  | 64.80)   | 0.17)   |          | 976.31)  | ,        | 0.25)   |        | 388.07)  | 189.89)  | -1.24)  |        | 6.47)  | 2.69)  | -1.67)  |        |
|                                          |         |          |         |          | 1042.60) |          |         |        |          |          |         |        |        |        |         |        |
| Vanuatu                                  | 46.00   | 45.81    | -0.02   |          | 790.14   | 790.44   | 0.00    |        | 751.70   | 705.67   | -0.21   | 11.97  | 11.07  | -0.26  |         |        |
|                                          | (24.48, | (29.94,  | (-0.02, | <0.001   | (690.01, | (719.19, | (-0.00, | 0.509  | (652.30, | (637.93, | (-0.39, | 0.021  | (2.65, | (4.13, | (-0.45, | 0.008  |
|                                          | 79.81)  | 67.53)   | -0.01)  |          | 901.51)  | 867.16)  | 0.01)   |        | 862.61)  | 778.95)  | -0.03)  |        | 34.96) | 24.37) | -0.07)  |        |
| Venezuela<br>(Bolivarian<br>Republic of) | 1.16    | 0.91     | -0.79   |          | 18.07    | 14.94    | -0.66   |        | 45.96    | 12.74    | -4.30   | 0.74   | 0.20   | -4.44  |         |        |
|                                          | (0.84,  | (0.67,   | (-0.98, | <0.001   | (16.75,  | (13.90,  | (-0.73, | <0.001 | (43.85,  | (11.79,  | (-4.99, | <0.001 | (0.50, | (0.10, | (-5.15, | <0.001 |
|                                          | 1.56)   | 1.21)    | -0.60)  |          | 19.47)   | 16.03)   | -0.60)  |        | 48.15)   | 13.75)   | -3.61)  |        | 1.08)  | 0.37)  | -3.73)  |        |
| Viet Nam                                 | 2.21    | 2.09     | -0.17   |          | 22.10    | 26.44    | 0.62    |        | 54.03    | 19.13    | -3.53   | 0.90   | 0.30   | -3.69  |         |        |
|                                          | (1.95,  | (1.90,   | (-0.35, | 0.054    | (21.29,  | (25.73,  | (0.58,  | <0.001 | (52.76,  | (18.53,  | (-3.72, | <0.001 | (0.74, | (0.23, | (-3.85, | <0.001 |
|                                          | 2.49)   | 2.30)    | 0.00)   |          | 22.93)   | 27.16)   | 0.67)   |        | 55.33)   | 19.73)   | -3.33)  |        | 1.09)  | 0.39)  | -3.52)  |        |
| Yemen                                    | 63.00   | 65.47    | 0.12    |          | 850.71   | 912.53   | 0.26    |        | 137.92   | 91.54    | -1.40   | 1.67   | 0.81   | -2.44  |         |        |
|                                          | (59.77, | (63.53,  | (0.04,  | 0.002    | (838.34, | (905.12, | (0.21,  | <0.001 | (132.88, | (89.19,  | (-1.66, | <0.001 | (1.15, | (0.60, | (-2.68, | <0.001 |
|                                          | 66.37)  | 67.46)   | 0.20)   |          | 863.22)  | 919.99)  | 0.32)   |        | 143.11)  | 93.94)   | -1.14)  |        | 2.35)  | 1.07)  | -2.19)  |        |
| Zambia                                   | 103.34  | 105.82   | 0.08    |          | 1736.56  | 1744.80  | 0.01    |        | 147.47   | 126.38   | -0.54   | 1.00   | 0.68   | -1.33  |         |        |
|                                          | (98.23, | (102.58, | (0.06,  | <0.001   | (1714.33 | (1731.15 | (-0.00, | 0.140  | (141.27, | (122.77, | (-0.61, | <0.001 | (0.56, | (0.44, | (-1.49, | <0.001 |
|                                          | 108.70) | 109.14)  | 0.09)   |          | ,        | ,        | 0.03)   |        | 153.91)  | 130.07)  | -0.46)  |        | 1.71)  | 1.01)  | -1.18)  |        |
|                                          |         |          |         | 1759.03) | 1758.54) |          |         |        |          |          |         |        |        |        |         |        |

|                               |         |         |         |        |          |          |         |        |          |          |         |        |         |         |         |        |
|-------------------------------|---------|---------|---------|--------|----------|----------|---------|--------|----------|----------|---------|--------|---------|---------|---------|--------|
|                               | 90.82   | 94.09   | 0.13    |        | 1448.55  | 1499.66  | 0.12    |        | 290.16   | 339.31   | 0.53    |        | 3.44    | 4.19    | 0.66    |        |
| Zimbabwe                      | (86.59, | (90.65, | (0.07,  | <0.001 | (1430.77 | (1485.49 | (0.11,  | <0.001 | (282.60, | (332.77, | (0.34,  | <0.001 | (2.66,  | (3.49,  | (0.43,  | <0.001 |
|                               | 95.23)  | 97.63)  | 0.20)   |        | ,        | ,        | 0.13)   |        | 297.91)  | 345.96)  | 0.73)   |        | 4.42)   | 5.00)   | 0.90)   |        |
|                               |         |         |         |        | 1466.52) | 1513.94) |         |        |          |          |         |        |         |         |         |        |
| <b>Ischemic heart disease</b> |         |         |         |        |          |          |         |        |          |          |         |        |         |         |         |        |
| <b>Overall</b>                |         |         |         |        |          |          |         |        |          |          |         |        |         |         |         |        |
|                               | 40.07   | 42.39   | 0.19    |        | 236.03   | 259.26   | 0.36    |        | 1582.86  | 1052.60  | -1.31   |        | 28.21   | 18.81   | -1.30   |        |
| Afghanistan                   | (37.69, | (41.20, | (0.15,  | <0.001 | (230.06, | (256.21, | (0.25,  | <0.001 | (1567.54 | (1046.51 | (-1.49, | <0.001 | (26.19, | (18.00, | (-1.48, | <0.001 |
|                               | 42.58)  | 43.60)  | 0.23)   |        | 242.12)  | 262.35)  | 0.47)   |        | ,        | ,        | -1.13)  |        | 30.36)  | 19.65)  | -1.13)  |        |
|                               |         |         |         |        |          |          |         |        | 1598.30) | 1058.71) |         |        |         |         |         |        |
|                               | 21.19   | 19.12   | -0.35   |        | 151.55   | 140.25   | -0.27   |        | 343.27   | 486.75   | 0.99    |        | 5.82    | 8.28    | 1.00    |        |
| Albania                       | (18.79, | (16.46, | (-0.37, | <0.001 | (144.88, | (132.79, | (-0.28, | <0.001 | (333.43, | (472.93, | (0.43,  | 0.001  | (4.60,  | (6.56,  | (0.43,  | 0.001  |
|                               | 23.83)  | 22.11)  | -0.33)  |        | 158.47)  | 148.04)  | -0.26)  |        | 353.35)  | 500.87)  | 1.56)   |        | 7.29)   | 10.32)  | 1.57)   |        |
|                               |         |         |         |        |          |          |         |        | 1092.75  | 489.61   | -2.64   |        | 19.18   | 8.52    | -2.67   |        |
| Algeria                       | (33.30, | (33.23, | (-0.08, | <0.001 | (219.14, | (221.96, | (-0.04, | 0.339  | (1085.65 | (486.41, | (-2.91, | <0.001 | (18.24, | (8.11,  | (-2.94, | <0.001 |
|                               | 35.83)  | 34.92)  | -0.03)  |        | 225.72)  | 226.23)  | 0.13)   |        | ,        | 492.83)  | -2.37)  |        | 20.16)  | 8.96)   | -2.41)  |        |
|                               |         |         |         |        |          |          |         |        | 1099.88) |          |         |        |         |         |         |        |
|                               | 25.23   | 26.27   | 0.14    |        | 217.53   | 232.96   | 0.23    |        | 499.21   | 575.23   | 0.50    |        | 8.96    | 10.26   | 0.44    |        |
| American Samoa                | (7.66,  | (8.16,  | (0.13,  | <0.001 | (153.68, | (166.64, | (0.22,  | <0.001 | (399.26, | (467.74, | (0.25,  | <0.001 | (0.67,  | (1.01,  | (0.16,  | 0.002  |
|                               | 62.66)  | 64.32)  | 0.15)   |        | 299.71)  | 317.62)  | 0.24)   |        | 617.20)  | 700.69)  | 0.74)   |        | 39.04)  | 41.12)  | 0.73)   |        |
|                               |         |         |         |        |          |          |         |        |          |          |         |        |         |         |         |        |
| Andorra                       | (12.26, | (10.67, | (-0.36, | <0.001 | (115.90, | (122.20, | (0.08,  | <0.001 | (79.57,  | (40.64,  | (-2.05, | <0.001 | (0.00,  | (0.00,  | (-2.12, | <0.001 |
|                               | 60.98)  | 57.03)  | -0.26)  |        | 217.16)  | 220.81)  | 0.14)   |        | 167.98)  | 105.61)  | -1.79)  |        | 23.63)  | 21.00)  | -1.76)  |        |
|                               |         |         |         |        |          |          |         |        |          |          |         |        |         |         |         |        |
| Angola                        | (27.96, | (27.03, | (-0.22, | <0.001 | (132.59, | (128.84, | (-0.15, | <0.001 | (292.05, | (226.66, | (-1.55, | 0.029  | (4.49,  | (3.62,  | (-1.56, | 0.027  |
|                               | 31.61)  | 29.14)  | -0.19)  |        | 140.56)  | 133.53)  | -0.13)  |        | 303.62)  | 232.73)  | -0.08)  |        | 6.06)   | 4.44)   | -0.10)  |        |
|                               |         |         |         |        |          |          |         |        |          |          |         |        |         |         |         |        |
| Antigua and Barbuda           | 59.94   | 58.31   | -0.10   |        | 317.98   | 304.49   | -0.17   |        | 252.88   | 111.38   | -2.78   |        | 4.44    | 1.91    | -2.87   |        |
|                               | (33.52, | (35.97, | (-0.11, | <0.001 | (250.68, | (250.27, | (-0.26, | <0.001 | (193.49, | (79.58,  | (-4.05, | <0.001 | (0.14,  | (0.01,  | (-4.12, | <0.001 |
|                               | 99.68)  | 89.94)  | -0.08)  |        | 398.18)  | 367.50)  | -0.08)  |        | 325.20)  | 152.22)  | -1.50)  |        | 24.58)  | 15.21)  | -1.60)  |        |
|                               |         |         |         |        |          |          |         |        |          |          |         |        |         |         |         |        |
| Argentina                     | 15.93   | 14.96   | -0.22   |        | 83.78    | 82.31    | -0.06   |        | 371.23   | 156.51   | -2.98   |        | 6.53    | 2.73    | -3.04   |        |
|                               | (15.22, | (14.40, | (-0.23, | <0.001 | (82.15,  | (80.98,  | (-0.08, | <0.001 | (367.79, | (154.67, | (-3.17, | <0.001 | (6.08,  | (2.49,  | (-3.24, | <0.001 |
|                               | 16.66)  | 15.54)  | -0.20)  |        | 85.44)   | 83.65)   | -0.05)  |        | 374.70)  | 158.36)  | -2.79)  |        | 7.00)   | 2.99)   | -2.84)  |        |

|            |         |         |         |        |          |          |         |        |          |          |         |        |         |        |         |        |
|------------|---------|---------|---------|--------|----------|----------|---------|--------|----------|----------|---------|--------|---------|--------|---------|--------|
|            | 37.02   | 35.54   | -0.14   |        | 229.83   | 222.67   | -0.11   |        | 482.49   | 304.71   | -1.55   |        | 8.66    | 5.43   | -1.58   |        |
| Armenia    | (33.95, | (32.28, | (-0.15, | <0.001 | (222.03, | (214.59, | (-0.13, | <0.001 | (471.15, | (295.15, | (-2.66, | 0.007  | (7.20,  | (4.22, | (-2.67, | 0.005  |
|            | 40.29)  | 39.08)  | -0.12)  |        | 237.83)  | 231.03)  | -0.10)  |        | 494.05)  | 314.56)  | -0.43)  |        | 10.34)  | 6.94)  | -0.48)  |        |
|            | 55.22   | 48.97   | -0.43   |        | 250.09   | 235.70   | -0.25   |        | 173.92   | 84.37    | -2.45   |        | 3.10    | 1.51   | -2.46   |        |
| Australia  | (53.49, | (47.53, | (-0.50, | <0.001 | (246.42, | (232.58, | (-0.48, | 0.036  | (170.86, | (82.52,  | (-2.92, | <0.001 | (2.71,  | (1.27, | (-3.12, | <0.001 |
|            | 56.99)  | 50.44)  | -0.37)  |        | 253.80)  | 238.86)  | -0.02)  |        | 177.02)  | 86.27)   | -1.98)  |        | 3.54)   | 1.78)  | -1.80)  |        |
|            | 34.78   | 31.42   | -0.35   |        | 178.89   | 176.73   | -0.04   |        | 180.62   | 68.41    | -3.31   |        | 3.22    | 1.20   | -3.59   |        |
| Austria    | (32.73, | (29.45, | (-0.37, | <0.001 | (174.15, | (172.11, | (-0.07, | 0.001  | (175.84, | (65.55,  | (-4.03, | <0.001 | (2.61,  | (0.85, | (-4.13, | <0.001 |
|            | 36.93)  | 33.51)  | -0.33)  |        | 183.73)  | 181.46)  | -0.02)  |        | 185.51)  | 71.38)   | -2.58)  |        | 3.94)   | 1.67)  | -3.05)  |        |
|            | 38.17   | 35.75   | -0.22   |        | 229.39   | 215.33   | -0.22   |        | 740.76   | 532.21   | -1.11   |        | 13.18   | 9.31   | -1.17   |        |
| Azerbaijan | (35.97, | (34.05, | (-0.24, | <0.001 | (223.80, | (211.15, | (-0.23, | <0.001 | (730.75, | (525.48, | (-2.09, | 0.027  | (11.87, | (8.45, | (-2.14, | 0.019  |
|            | 40.47)  | 37.53)  | -0.21)  |        | 235.09)  | 219.59)  | -0.21)  |        | 750.87)  | 539.00)  | -0.12)  |        | 14.61)  | 10.26) | -0.20)  |        |
|            | 61.45   | 62.41   | 0.06    |        | 298.07   | 299.02   | 0.02    |        | 362.82   | 266.43   | -1.13   |        | 6.45    | 4.73   | -1.20   |        |
| Bahamas    | (47.76, | (50.50, | (0.04,  | <0.001 | (266.01, | (272.31, | (0.00,  | 0.016  | (327.36, | (241.25, | (-2.20, | 0.040  | (2.54,  | (1.94, | (-2.40, | 0.052  |
|            | 78.04)  | 76.35)  | 0.08)   |        | 333.06)  | 327.72)  | 0.03)   |        | 401.19)  | 293.60)  | -0.05)  |        | 13.67)  | 9.74)  | 0.01)   |        |
|            | 42.47   | 38.25   | -0.35   |        | 307.26   | 276.99   | -0.35   |        | 867.81   | 245.19   | -4.28   |        | 15.00   | 4.17   | -4.34   |        |
| Bahrain    | (35.11, | (33.77, | (-0.39, | <0.001 | (286.92, | (265.48, | (-0.39, | <0.001 | (832.55, | (233.45, | (-4.82, | <0.001 | (10.71, | (2.80, | (-4.93, | <0.001 |
|            | 51.20)  | 43.31)  | -0.32)  |        | 328.90)  | 289.01)  | -0.31)  |        | 904.39)  | 257.47)  | -3.74)  |        | 20.75)  | 6.17)  | -3.75)  |        |
|            | 23.53   | 23.61   | 0.01    |        | 156.56   | 162.61   | 0.12    |        | 459.69   | 314.53   | -1.24   |        | 8.02    | 5.51   | -1.23   |        |
| Bangladesh | (23.04, | (23.24, | (-0.01, | 0.322  | (155.24, | (161.63, | (0.10,  | <0.001 | (457.48, | (313.17, | (-1.61, | <0.001 | (7.73,  | (5.33, | (-1.59, | <0.001 |
|            | 24.04)  | 23.98)  | 0.02)   |        | 157.89)  | 163.60)  | 0.15)   |        | 461.91)  | 315.89)  | -0.87)  |        | 8.32)   | 5.70)  | -0.86)  |        |
|            | 61.19   | 62.65   | 0.09    |        | 321.94   | 328.22   | 0.06    |        | 219.65   | 109.95   | -2.64   |        | 3.85    | 1.88   | -2.69   |        |
| Barbados   | (47.47, | (48.26, | (0.04,  | 0.002  | (289.21, | (294.61, | (0.05,  | <0.001 | (192.74, | (90.79,  | (-3.66, | <0.001 | (1.09,  | (0.22, | (-3.70, | <0.001 |
|            | 77.73)  | 80.14)  | 0.15)   |        | 357.43)  | 364.80)  | 0.08)   |        | 249.33)  | 132.13)  | -1.60)  |        | 9.76)   | 7.21)  | -1.67)  |        |
|            | 34.88   | 34.08   | -0.09   |        | 193.82   | 190.72   | -0.06   |        | 537.31   | 411.60   | -0.85   |        | 9.76    | 7.47   | -0.85   |        |
| Belarus    | (33.12, | (32.15, | (-0.11, | <0.001 | (189.66, | (186.29, | (-0.08, | <0.001 | (530.37, | (405.16, | (-2.36, | 0.273  | (8.85,  | (6.63, | (-2.38, | 0.280  |
|            | 36.73)  | 36.12)  | -0.07)  |        | 198.06)  | 195.25)  | -0.04)  |        | 544.32)  | 418.14)  | 0.68)   |        | 10.75)  | 8.42)  | 0.70)   |        |
|            | 31.58   | 29.76   | -0.20   |        | 171.57   | 183.15   | 0.23    |        | 228.14   | 63.58    | -4.28   |        | 4.01    | 1.10   | -4.35   |        |
| Belgium    | (29.85, | (28.03, | (-0.23, | <0.001 | (167.53, | (178.91, | (0.18,  | <0.001 | (223.44, | (61.08,  | (-5.08, | <0.001 | (3.41,  | (0.79, | (-5.18, | <0.001 |
|            | 33.40)  | 31.58)  | -0.16)  |        | 175.70)  | 187.47)  | 0.28)   |        | 232.93)  | 66.16)   | -3.48)  |        | 4.69)   | 1.49)  | -3.51)  |        |
|            | 62.66   | 66.77   | 0.22    |        | 304.38   | 327.38   | 0.26    |        | 229.67   | 201.13   | -0.50   |        | 3.95    | 3.49   | -0.61   |        |
| Belize     | (44.53, | (54.99, | (0.21,  | <0.001 | (260.79, | (300.13, | (0.24,  | <0.001 | (193.02, | (180.04, | (-1.31, | 0.226  | (0.60,  | (1.24, | (-1.42, | 0.147  |
|            | 86.23)  | 80.40)  | 0.23)   |        | 353.46)  | 356.46)  | 0.28)   |        | 271.64)  | 224.05)  | 0.31)   |        | 13.84)  | 7.80)  | 0.22)   |        |

|                   |         |         |         |        |          |          |         |        |          |          |         |        |         |        |         |        |
|-------------------|---------|---------|---------|--------|----------|----------|---------|--------|----------|----------|---------|--------|---------|--------|---------|--------|
|                   | 25.00   | 26.58   | 0.21    |        | 137.41   | 145.81   | 0.22    |        | 196.50   | 200.64   | 0.06    |        | 3.45    | 3.51   | 0.05    |        |
| Benin             | (22.54, | (25.04, | (0.19,  | <0.001 | (131.38, | (142.05, | (0.15,  | <0.001 | (189.36, | (196.31, | (-0.23, | 0.680  | (2.56,  | (2.95, | (-0.24, | 0.743  |
|                   | 27.68)  | 28.19)  | 0.24)   |        | 143.66)  | 149.64)  | 0.28)   |        | 203.85)  | 205.05)  | 0.35)   |        | 4.57)   | 4.14)  | 0.34)   |        |
|                   | 56.80   | 53.50   | -0.21   |        | 311.66   | 288.10   | -0.30   |        | 291.56   | 87.53    | -4.47   |        | 5.07    | 1.49   | -4.53   |        |
| Bermuda           | (32.32, | (26.09, | (-0.24, | <0.001 | (250.62, | (220.73, | (-0.45, | <0.001 | (231.72, | (52.04,  | (-5.00, | <0.001 | (0.33,  | (0.00, | (-5.25, | <0.001 |
|                   | 95.69)  | 100.75) | -0.18)  |        | 385.66)  | 372.81)  | -0.16)  |        | 364.58)  | 141.70)  | -3.93)  |        | 27.83)  | 28.51) | -3.81)  |        |
|                   | 26.00   | 25.02   | -0.13   |        | 168.14   | 165.47   | -0.06   |        | 469.36   | 395.74   | -0.58   |        | 8.27    | 6.89   | -0.63   |        |
| Bhutan            | (19.61, | (20.06, | (-0.14, | <0.001 | (150.53, | (152.19, | (-0.07, | <0.001 | (440.25, | (375.13, | (-0.74, | <0.001 | (4.80,  | (4.41, | (-0.79, | <0.001 |
|                   | 33.95)  | 30.87)  | -0.11)  |        | 187.31)  | 179.63)  | -0.04)  |        | 499.97)  | 417.21)  | -0.42)  |        | 13.40)  | 10.29) | -0.47)  |        |
| Bolivia           | 11.14   | 10.98   | -0.05   |        | 89.37    | 91.11    | 0.07    |        | 362.00   | 192.84   | -2.12   |        | 6.21    | 3.27   | -2.15   |        |
| (Plurinational    | (9.81,  | (10.05, | (-0.07, | <0.001 | (85.40,  | (88.37,  | (0.05,  | <0.001 | (354.18, | (188.89, | (-2.33, | <0.001 | (5.21,  | (2.77, | (-2.36, | <0.001 |
| State of)         | 12.62)  | 11.97)  | -0.03)  |        | 93.47)   | 93.92)   | 0.09)   |        | 369.94)  | 196.85)  | -1.91)  |        | 7.34)   | 3.83)  | -1.95)  |        |
|                   | 25.48   | 23.44   | -0.28   |        | 202.66   | 194.07   | -0.14   |        | 385.99   | 199.30   | -2.50   |        | 6.84    | 3.47   | -2.57   |        |
| Bosnia and        | (23.29, | (20.67, | (-0.30, | <0.001 | (196.41, | (186.08, | (-0.18, | <0.001 | (377.34, | (191.15, | (-3.02, | <0.001 | (5.73,  | (2.47, | (-3.09, | <0.001 |
| Herzegovina       | 27.81)  | 26.51)  | -0.27)  |        | 209.06)  | 202.36)  | -0.11)  |        | 394.80)  | 207.74)  | -1.98)  |        | 8.11)   | 4.77)  | -2.05)  |        |
|                   | 30.47   | 31.95   | 0.16    |        | 132.83   | 146.58   | 0.34    |        | 198.90   | 229.13   | 0.56    |        | 3.54    | 4.06   | 0.53    |        |
| Botswana          | (25.47, | (28.67, | (0.15,  | <0.001 | (121.78, | (139.52, | (0.32,  | <0.001 | (185.39, | (220.25, | (0.33,  | <0.001 | (1.94,  | (2.96, | (0.30,  | <0.001 |
|                   | 36.22)  | 35.50)  | 0.17)   |        | 144.64)  | 153.92)  | 0.35)   |        | 213.17)  | 238.30)  | 0.78)   |        | 5.97)   | 5.46)  | 0.75)   |        |
|                   | 18.17   | 16.12   | -0.42   |        | 133.71   | 132.04   | -0.05   |        | 427.87   | 228.71   | -2.12   |        | 7.64    | 3.98   | -2.22   |        |
| Brazil            | (17.83, | (15.86, | (-0.52, | <0.001 | (132.76, | (131.30, | (-0.07, | <0.001 | (426.16, | (227.72, | (-2.40, | <0.001 | (7.42,  | (3.85, | (-2.49, | <0.001 |
|                   | 18.52)  | 16.39)  | -0.32)  |        | 134.67)  | 132.78)  | -0.03)  |        | 429.57)  | 229.69)  | -1.84)  |        | 7.88)   | 4.11)  | -1.94)  |        |
|                   | 26.58   | 25.38   | -0.16   |        | 148.70   | 151.50   | 0.10    |        | 681.42   | 349.58   | -2.29   |        | 11.70   | 6.14   | -2.28   |        |
| Brunei Darussalam | (18.30, | (19.08, | (-0.18, | <0.001 | (127.83, | (135.63, | (-0.15, | 0.434  | (635.95, | (325.01, | (-2.80, | <0.001 | (6.44,  | (3.30, | (-2.72, | <0.001 |
|                   | 37.46)  | 33.29)  | -0.14)  |        | 172.10)  | 168.88)  | 0.35)   |        | 729.36)  | 375.67)  | -1.78)  |        | 19.65)  | 10.68) | -1.83)  |        |
|                   | 22.50   | 22.44   | -0.01   |        | 169.66   | 175.99   | 0.14    |        | 671.37   | 455.09   | -1.25   |        | 11.94   | 8.11   | -1.23   |        |
| Bulgaria          | (20.85, | (20.49, | (-0.02, | 0.127  | (165.16, | (170.68, | (0.09,  | <0.001 | (662.35, | (446.43, | (-1.75, | <0.001 | (10.77, | (7.00, | (-1.74, | <0.001 |
|                   | 24.24)  | 24.54)  | 0.00)   |        | 174.26)  | 181.46)  | 0.19)   |        | 680.50)  | 463.90)  | -0.74)  |        | 13.21)  | 9.38)  | -0.72)  |        |
|                   | 23.70   | 24.63   | 0.13    |        | 130.22   | 135.72   | 0.16    |        | 219.94   | 242.12   | 0.36    |        | 3.86    | 4.23   | 0.36    |        |
| Burkina Faso      | (21.89, | (23.52, | (0.12,  | <0.001 | (125.81, | (133.02, | (0.12,  | <0.001 | (214.30, | (238.58, | (-0.08, | 0.109  | (3.14,  | (3.77, | (-0.09, | 0.115  |
|                   | 25.62)  | 25.79)  | 0.14)   |        | 134.75)  | 138.46)  | 0.19)   |        | 225.70)  | 245.70)  | 0.79)   |        | 4.70)   | 4.74)  | 0.80)   |        |
|                   | 27.76   | 28.77   | 0.12    |        | 147.76   | 152.95   | 0.13    |        | 328.91   | 287.86   | -0.49   |        | 5.75    | 4.99   | -0.52   |        |
| Burundi           | (25.41, | (27.16, | (0.11,  | <0.001 | (142.11, | (149.11, | (0.09,  | <0.001 | (320.59, | (282.69, | (-0.84, | 0.005  | (4.69,  | (4.33, | (-0.87, | 0.003  |
|                   | 30.28)  | 30.46)  | 0.13)   |        | 153.59)  | 156.88)  | 0.17)   |        | 337.41)  | 293.11)  | -0.15)  |        | 6.99)   | 5.73)  | -0.17)  |        |

|                             |         |         |         |        |          |          |         |        |          |          |         |        |        |        |         |        |
|-----------------------------|---------|---------|---------|--------|----------|----------|---------|--------|----------|----------|---------|--------|--------|--------|---------|--------|
|                             | 24.91   | 27.59   | 0.35    |        | 149.10   | 168.86   | 0.43    |        | 228.68   | 163.76   | -1.16   |        | 4.07   | 2.83   | -1.36   |        |
| Cabo Verde                  | (16.16, | (21.49, | (0.33,  | <0.001 | (125.09, | (153.12, | (0.41,  | <0.001 | (198.74, | (148.20, | (-1.55, | <0.001 | (1.02, | (1.14, | (-1.79, | <0.001 |
|                             | 37.22)  | 34.94)  | 0.36)   |        | 176.66)  | 185.83)  | 0.45)   |        | 262.13)  | 180.54)  | -0.77)  |        | 11.34) | 5.90)  | -0.93)  |        |
|                             | 23.70   | 22.63   | -0.16   |        | 147.14   | 140.92   | -0.13   |        | 412.81   | 300.98   | -1.09   |        | 7.27   | 5.25   | -1.11   |        |
| Cambodia                    | (22.07, | (21.53, | (-0.19, | <0.001 | (142.94, | (138.14, | (-0.19, | <0.001 | (405.87, | (296.93, | (-1.22, | <0.001 | (6.37, | (4.73, | (-1.29, | <0.001 |
|                             | 25.41)  | 23.77)  | -0.13)  |        | 151.44)  | 143.75)  | -0.07)  |        | 419.85)  | 305.07)  | -0.95)  |        | 8.27)  | 5.82)  | -0.94)  |        |
|                             | 22.37   | 25.24   | 0.42    |        | 113.79   | 129.36   | 0.45    |        | 153.16   | 211.47   | 1.12    |        | 2.67   | 3.69   | 1.12    |        |
| Cameroon                    | (20.77, | (24.30, | (0.37,  | <0.001 | (110.03, | (127.16, | (0.40,  | <0.001 | (148.88, | (208.71, | (0.94,  | <0.001 | (2.13, | (3.33, | (0.94,  | <0.001 |
|                             | 24.07)  | 26.21)  | 0.47)   |        | 117.65)  | 131.58)  | 0.50)   |        | 157.53)  | 214.26)  | 1.29)   |        | 3.31)  | 4.08)  | 1.31)   |        |
|                             | 40.85   | 31.90   | -0.84   |        | 186.17   | 162.78   | -0.47   |        | 165.78   | 84.01    | -2.32   |        | 2.89   | 1.46   | -2.34   |        |
| Canada                      | (39.71, | (30.91, | (-0.86, | <0.001 | (183.77, | (160.57, | (-0.51, | <0.001 | (163.50, | (82.42,  | (-2.69, | <0.001 | (2.60, | (1.25, | (-2.74, | <0.001 |
|                             | 42.01)  | 32.92)  | -0.83)  |        | 188.60)  | 165.02)  | -0.44)  |        | 168.08)  | 85.62)   | -1.95)  |        | 3.21)  | 1.68)  | -1.94)  |        |
|                             | 30.97   | 31.23   | 0.03    |        | 126.41   | 128.63   | 0.08    |        | 349.00   | 357.79   | 0.12    |        | 6.16   | 6.33   | 0.13    |        |
| Central African<br>Republic | (27.44, | (28.71, | (0.02,  | <0.001 | (118.92, | (123.34, | (-0.02, | 0.103  | (336.68, | (349.07, | (-0.16, | 0.403  | (4.60, | (5.21, | (-0.14, | 0.352  |
|                             | 34.85)  | 33.91)  | 0.04)   |        | 134.27)  | 134.09)  | 0.17)   |        | 361.68)  | 366.68)  | 0.40)   |        | 8.09)  | 7.62)  | 0.40)   |        |
|                             | 23.94   | 26.37   | 0.33    |        | 132.09   | 147.06   | 0.39    |        | 171.81   | 209.86   | 0.82    |        | 3.00   | 3.66   | 0.81    |        |
| Chad                        | (21.74, | (24.92, | (0.32,  | <0.001 | (126.70, | (143.48, | (0.34,  | <0.001 | (165.77, | (205.69, | (0.67,  | <0.001 | (2.24, | (3.12, | (0.67,  | <0.001 |
|                             | 26.31)  | 27.88)  | 0.34)   |        | 137.64)  | 150.72)  | 0.43)   |        | 178.01)  | 214.10)  | 0.97)   |        | 3.93)  | 4.26)  | 0.96)   |        |
|                             | 20.13   | 19.09   | -0.18   |        | 117.31   | 116.57   | -0.02   |        | 114.73   | 87.90    | -0.92   |        | 2.02   | 1.55   | -0.92   |        |
| Chile                       | (18.96, | (18.09, | (-0.21, | <0.001 | (114.42, | (114.08, | (-0.03, | 0.023  | (111.88, | (85.74,  | (-1.28, | <0.001 | (1.66, | (1.27, | (-1.26, | <0.001 |
|                             | 21.35)  | 20.14)  | -0.16)  |        | 120.25)  | 119.11)  | -0.00)  |        | 117.64)  | 90.10)   | -0.56)  |        | 2.45)  | 1.87)  | -0.57)  |        |
|                             | 20.05   | 19.86   | -0.04   |        | 212.48   | 223.40   | 0.17    |        | 356.38   | 298.66   | -0.48   |        | 6.09   | 5.09   | -0.49   |        |
| China                       | (19.93, | (19.74, | (-0.08, | 0.037  | (212.07, | (223.01, | (0.12,  | <0.001 | (355.87, | (298.20, | (-0.80, | 0.003  | (6.02, | (5.03, | (-0.81, | 0.002  |
|                             | 20.18)  | 19.98)  | -0.00)  |        | 212.88)  | 223.79)  | 0.21)   |        | 356.90)  | 299.12)  | -0.17)  |        | 6.15)  | 5.15)  | -0.18)  |        |
|                             | 24.51   | 22.11   | -0.34   |        | 138.42   | 130.73   | -0.20   |        | 337.22   | 169.17   | -2.34   |        | 5.87   | 2.91   | -2.51   |        |
| Colombia                    | (23.66, | (21.45, | (-0.38, | <0.001 | (136.35, | (129.11, | (-0.21, | <0.001 | (334.03, | (167.33, | (-3.08, | <0.001 | (5.46, | (2.67, | (-2.78, | <0.001 |
|                             | 25.37)  | 22.78)  | -0.31)  |        | 140.51)  | 132.36)  | -0.18)  |        | 340.42)  | 171.02)  | -1.59)  |        | 6.31)  | 3.16)  | -2.24)  |        |
|                             | 27.66   | 27.94   | 0.03    |        | 168.27   | 170.40   | 0.05    |        | 215.68   | 243.32   | 0.45    |        | 3.75   | 4.22   | 0.44    |        |
| Comoros                     | (19.65, | (22.08, | (0.02,  | <0.001 | (146.69, | (155.16, | (0.04,  | <0.001 | (191.68, | (225.25, | (-1.99, | 0.722  | (1.22, | (2.14, | (-1.94, | 0.720  |
|                             | 38.04)  | 34.93)  | 0.04)   |        | 192.22)  | 186.76)  | 0.06)   |        | 241.98)  | 262.48)  | 2.95)   |        | 8.97)  | 7.49)  | 2.87)   |        |
|                             | 31.34   | 30.52   | -0.10   |        | 141.98   | 140.03   | -0.04   |        | 429.36   | 254.13   | -1.86   |        | 7.62   | 4.49   | -1.87   |        |
| Congo                       | (27.55, | (28.17, | (-0.11, | <0.001 | (133.51, | (134.92, | (-0.10, | 0.178  | (414.73, | (247.26, | (-2.70, | <0.001 | (5.77, | (3.61, | (-2.71, | <0.001 |
|                             | 35.52)  | 33.02)  | -0.08)  |        | 150.87)  | 145.28)  | 0.02)   |        | 444.39)  | 261.14)  | -1.01)  |        | 9.90)  | 5.51)  | -1.03)  |        |

|                   |         |         |         |        |          |          |         |        |          |          |         |        |        |        |         |        |
|-------------------|---------|---------|---------|--------|----------|----------|---------|--------|----------|----------|---------|--------|--------|--------|---------|--------|
|                   | 24.68   | 24.67   | 0.00    |        | 214.98   | 222.40   | 0.11    |        | 541.39   | 452.94   | -0.60   |        | 9.68   | 8.07   | -0.61   |        |
| Cook Islands      | (2.32,  | (1.56,  | (-0.02, | 0.901  | (119.25, | (117.29, | (0.09,  | <0.001 | (380.52, | (295.32, | (-0.81, | <0.001 | (0.04, | (0.00, | (-0.82, | <0.001 |
|                   | 102.49) | 111.02) | 0.02)   |        | 359.59)  | 383.67)  | 0.14)   |        | 749.56)  | 665.32)  | -0.39)  |        | 78.28) | 82.26) | -0.41)  |        |
|                   | 24.37   | 22.91   | -0.21   |        | 150.26   | 150.93   | 0.01    |        | 232.86   | 144.52   | -1.58   |        | 4.11   | 2.52   | -1.62   |        |
| Costa Rica        | (21.67, | (20.85, | (-0.22, | <0.001 | (143.28, | (145.59, | (-0.01, | 0.212  | (224.19, | (139.29, | (-2.54, | 0.001  | (3.02, | (1.87, | (-2.61, | 0.002  |
|                   | 27.33)  | 25.13)  | -0.19)  |        | 157.51)  | 156.43)  | 0.03)   |        | 241.79)  | 149.92)  | -0.61)  |        | 5.47)  | 3.33)  | -0.62)  |        |
|                   | 28.07   | 29.84   | 0.21    |        | 148.77   | 156.32   | 0.19    |        | 258.46   | 230.96   | -0.38   |        | 4.56   | 4.05   | -0.40   |        |
| Cote d'Ivoire     | (26.47, | (28.79, | (0.19,  | <0.001 | (144.92, | (153.86, | (0.14,  | <0.001 | (253.43, | (227.99, | (-0.63, | 0.004  | (3.91, | (3.66, | (-0.65, | 0.002  |
|                   | 29.75)  | 30.93)  | 0.22)   |        | 152.70)  | 158.81)  | 0.24)   |        | 263.56)  | 233.96)  | -0.12)  |        | 5.29)  | 4.47)  | -0.14)  |        |
|                   | 22.21   | 18.76   | -0.58   |        | 209.81   | 182.00   | -0.48   |        | 375.23   | 121.41   | -3.74   |        | 6.65   | 2.12   | -3.78   |        |
| Croatia           | (20.16, | (16.57, | (-0.60, | <0.001 | (203.51, | (175.18, | (-0.53, | <0.001 | (366.77, | (115.88, | (-4.44, | <0.001 | (5.57, | (1.45, | (-4.54, | <0.001 |
|                   | 24.43)  | 21.21)  | -0.56)  |        | 216.27)  | 189.06)  | -0.43)  |        | 383.86)  | 127.18)  | -3.04)  |        | 7.90)  | 3.04)  | -3.02)  |        |
|                   | 57.36   | 54.43   | -0.16   |        | 305.32   | 281.75   | -0.29   |        | 373.79   | 152.52   | -3.06   |        | 6.64   | 2.68   | -3.11   |        |
| Cuba              | (55.16, | (52.10, | (-0.23, | <0.001 | (300.05, | (276.44, | (-0.36, | <0.001 | (367.98, | (148.62, | (-3.56, | <0.001 | (5.89, | (2.18, | (-3.59, | <0.001 |
|                   | 59.63)  | 56.84)  | -0.10)  |        | 310.65)  | 287.13)  | -0.21)  |        | 379.68)  | 156.51)  | -2.57)  |        | 7.47)  | 3.26)  | -2.62)  |        |
|                   | 18.91   | 18.13   | -0.14   |        | 130.75   | 160.72   | 0.85    |        | 286.02   | 163.69   | -1.84   |        | 5.10   | 2.89   | -1.88   |        |
| Cyprus            | (14.41, | (14.75, | (-0.17, | <0.001 | (118.41, | (150.69, | (0.37,  | 0.001  | (267.56, | (153.53, | (-2.42, | <0.001 | (2.91, | (1.69, | (-2.56, | <0.001 |
|                   | 24.42)  | 22.26)  | -0.12)  |        | 144.08)  | 171.41)  | 1.34)   |        | 305.46)  | 174.53)  | -1.26)  |        | 8.36)  | 4.90)  | -1.20)  |        |
|                   | 37.03   | 33.11   | -0.38   |        | 250.24   | 220.37   | -0.45   |        | 346.48   | 87.37    | -4.65   |        | 6.23   | 1.50   | -4.80   |        |
| Czechia           | (35.11, | (31.19, | (-0.39, | <0.001 | (245.35, | (215.57, | (-0.51, | <0.001 | (340.77, | (84.38,  | (-5.13, | <0.001 | (5.49, | (1.14, | (-5.28, | <0.001 |
|                   | 39.02)  | 35.13)  | -0.37)  |        | 255.22)  | 225.26)  | -0.39)  |        | 352.27)  | 90.46)   | -4.16)  |        | 7.05)  | 1.98)  | -4.32)  |        |
| Democratic        | 18.00   | 19.10   | 0.21    |        | 180.11   | 192.34   | 0.23    |        | 502.15   | 549.70   | 0.30    |        | 8.63   | 9.40   | 0.30    |        |
| People's Republic | (17.06, | (18.27, | (0.19,  | <0.001 | (177.08, | (189.71, | (0.21,  | <0.001 | (497.18, | (545.20, | (0.21,  | <0.001 | (7.98, | (8.82, | (0.21,  | <0.001 |
| of Korea          | 18.97)  | 19.95)  | 0.22)   |        | 183.18)  | 194.99)  | 0.25)   |        | 507.17)  | 554.22)  | 0.39)   |        | 9.31)  | 10.01) | 0.40)   |        |
| Democratic        | 29.17   | 28.57   | -0.07   |        | 132.56   | 130.50   | -0.05   |        | 261.01   | 223.13   | -0.54   |        | 4.60   | 3.93   | -0.54   |        |
| Republic of the   | (28.22, | (27.97, | (-0.08, | <0.001 | (130.46, | (129.18, | (-0.07, | <0.001 | (258.11, | (221.43, | (-0.64, | <0.001 | (4.22, | (3.71, | (-0.64, | <0.001 |
| Congo             | 30.14)  | 29.18)  | -0.06)  |        | 134.68)  | 131.83)  | -0.04)  |        | 263.93)  | 224.84)  | -0.44)  |        | 5.00)  | 4.17)  | -0.44)  |        |
|                   | 41.37   | 32.20   | -0.85   |        | 219.16   | 185.97   | -0.57   |        | 160.15   | 33.20    | -5.41   |        | 2.87   | 0.57   | -5.45   |        |
| Denmark           | (38.57, | (29.67, | (-0.88, | <0.001 | (212.70, | (179.80, | (-0.58, | <0.001 | (154.66, | (30.63,  | (-6.05, | <0.001 | (2.18, | (0.28, | (-6.20, | <0.001 |
|                   | 44.32)  | 34.91)  | -0.83)  |        | 225.77)  | 192.32)  | -0.55)  |        | 165.80)  | 35.95)   | -4.77)  |        | 3.73)  | 1.06)  | -4.68)  |        |
|                   | 26.70   | 28.14   | 0.18    |        | 158.21   | 166.96   | 0.19    |        | 204.24   | 248.11   | 0.60    |        | 3.55   | 4.28   | 0.57    |        |
| Djibouti          | (19.44, | (23.75, | (0.16,  | <0.001 | (139.02, | (156.05, | (0.17,  | <0.001 | (182.79, | (234.69, | (0.36,  | <0.001 | (1.25, | (2.69, | (0.34,  | <0.001 |
|                   | 35.93)  | 33.12)  | 0.20)   |        | 179.38)  | 178.45)  | 0.21)   |        | 227.62)  | 262.10)  | 0.84)   |        | 8.07)  | 6.50)  | 0.81)   |        |

|                   |         |         |         |        |          |          |         |        |          |          |         |        |         |         |         |        |
|-------------------|---------|---------|---------|--------|----------|----------|---------|--------|----------|----------|---------|--------|---------|---------|---------|--------|
|                   | 60.31   | 61.32   | 0.06    |        | 295.27   | 299.08   | 0.04    |        | 237.07   | 136.96   | -1.92   |        | 4.17    | 2.38    | -1.94   |        |
| Dominica          | (34.16, | (34.87, | (0.03,  | <0.001 | (230.84, | (235.86, | (0.03,  | <0.001 | (180.17, | (95.43,  | (-2.43, | <0.001 | (0.11,  | (0.01,  | (-2.42, | <0.001 |
|                   | 99.56)  | 100.08) | 0.08)   |        | 372.54)  | 374.11)  | 0.05)   |        | 306.77)  | 190.52)  | -1.41)  |        | 24.05)  | 19.25)  | -1.45)  |        |
| Dominican         | 55.21   | 60.26   | 0.30    |        | 260.86   | 292.20   | 0.39    |        | 584.48   | 672.67   | 0.56    |        | 10.16   | 11.78   | 0.58    |        |
| Republic          | (52.44, | (58.00, | (0.29,  | <0.001 | (254.57, | (287.15, | (0.36,  | <0.001 | (575.31, | (665.03, | (0.24,  | 0.001  | (8.97,  | (10.79, | (0.25,  | <0.001 |
|                   | 58.10)  | 62.59)  | 0.32)   |        | 267.26)  | 297.32)  | 0.41)   |        | 593.78)  | 680.37)  | 0.88)   |        | 11.46)  | 12.85)  | 0.91)   |        |
| Ecuador           | 11.02   | 11.28   | 0.09    |        | 90.43    | 98.47    | 0.30    |        | 405.48   | 316.06   | -0.92   |        | 6.96    | 5.39    | -0.94   |        |
|                   | (9.98,  | (10.51, | (0.07,  | <0.001 | (87.30,  | (96.13,  | (0.27,  | <0.001 | (399.03, | (311.91, | (-1.45, | 0.001  | (6.13,  | (4.86,  | (-1.46, | <0.001 |
|                   | 12.14)  | 12.10)  | 0.11)   |        | 93.64)   | 100.85)  | 0.34)   |        | 412.01)  | 320.25)  | -0.40)  |        | 7.87)   | 5.96)   | -0.42)  |        |
| Egypt             | 38.75   | 38.45   | -0.03   |        | 260.05   | 267.72   | 0.12    |        | 1498.01  | 980.67   | -1.43   |        | 25.89   | 16.81   | -1.46   |        |
|                   | (37.88, | (37.84, | (-0.04, | <0.001 | (257.76, | (266.11, | (-0.01, | 0.071  | (1492.66 | (977.62, | (-1.91, | <0.001 | (25.18, | (16.42, | (-1.93, | <0.001 |
|                   | 39.63)  | 39.06)  | -0.01)  |        | 262.35)  | 269.33)  | 0.25)   |        | 1503.38) | 983.72)  | -0.95)  |        | 26.60)  | 17.22)  | -0.99)  |        |
| El Salvador       | 21.27   | 21.98   | 0.12    |        | 108.22   | 124.03   | 0.47    |        | 678.33   | 319.57   | -2.51   |        | 11.58   | 5.52    | -2.46   |        |
|                   | (19.18, | (20.15, | (0.09,  | <0.001 | (103.26, | (119.53, | (0.45,  | <0.001 | (666.42, | (312.44, | (-3.35, | <0.001 | (10.05, | (4.62,  | (-3.31, | <0.001 |
|                   | 23.54)  | 23.94)  | 0.15)   |        | 113.35)  | 128.66)  | 0.49)   |        | 690.41)  | 326.82)  | -1.65)  |        | 13.28)  | 6.56)   | -1.61)  |        |
| Equatorial Guinea | 29.80   | 27.29   | -0.31   |        | 132.06   | 127.58   | -0.12   |        | 332.93   | 148.89   | -2.68   |        | 5.87    | 2.57    | -2.74   |        |
|                   | (21.20, | (23.06, | (-0.33, | <0.001 | (112.78, | (117.87, | (-0.13, | <0.001 | (302.36, | (138.68, | (-3.08, | <0.001 | (2.46,  | (1.38,  | (-3.15, | <0.001 |
|                   | 40.84)  | 32.12)  | -0.29)  |        | 153.75)  | 137.92)  | -0.10)  |        | 365.83)  | 159.69)  | -2.27)  |        | 11.90)  | 4.43)   | -2.33)  |        |
| Eritrea           | 25.47   | 25.37   | -0.02   |        | 132.82   | 132.60   | -0.00   |        | 250.80   | 311.10   | 0.69    |        | 4.40    | 5.45    | 0.69    |        |
|                   | (22.42, | (23.45, | (-0.04, | 0.263  | (125.49, | (128.04, | (-0.01, | 0.221  | (240.86, | (304.22, | (0.15,  | 0.012  | (3.16,  | (4.57,  | (0.16,  | 0.011  |
|                   | 28.84)  | 27.41)  | 0.01)   |        | 140.48)  | 137.29)  | 0.00)   |        | 261.06)  | 318.10)  | 1.23)   |        | 5.98)   | 6.46)   | 1.22)   |        |
| Estonia           | 50.44   | 47.79   | -0.19   |        | 254.51   | 241.99   | -0.21   |        | 471.91   | 104.53   | -5.42   |        | 8.57    | 1.83    | -5.58   |        |
|                   | (44.91, | (41.59, | (-0.24, | <0.001 | (242.07, | (228.21, | (-0.37, | 0.009  | (454.97, | (95.57,  | (-6.47, | <0.001 | (6.43,  | (0.83,  | (-6.60, | <0.001 |
|                   | 56.49)  | 54.81)  | -0.15)  |        | 267.47)  | 256.55)  | -0.05)  |        | 489.37)  | 114.27)  | -4.37)  |        | 11.25)  | 3.79)   | -4.55)  |        |
| Eswatini          | 30.92   | 32.84   | 0.21    |        | 137.61   | 151.44   | 0.34    |        | 150.21   | 237.92   | 1.53    |        | 2.64    | 4.22    | 1.56    |        |
|                   | (24.32, | (27.87, | (0.20,  | <0.001 | (122.70, | (140.29, | (0.31,  | <0.001 | (134.79, | (223.94, | (0.99,  | <0.001 | (0.97,  | (2.54,  | (0.98,  | <0.001 |
|                   | 38.86)  | 38.48)  | 0.23)   |        | 153.88)  | 163.26)  | 0.36)   |        | 166.97)  | 252.56)  | 2.08)   |        | 5.85)   | 6.61)   | 2.14)   |        |
| Ethiopia          | 22.07   | 24.03   | 0.29    |        | 111.76   | 125.23   | 0.39    |        | 358.30   | 182.42   | -2.31   |        | 6.22    | 3.13    | -2.35   |        |
|                   | (21.35, | (23.54, | (0.27,  | <0.001 | (110.08, | (124.07, | (0.38,  | <0.001 | (355.38, | (181.06, | (-2.49, | <0.001 | (5.84,  | (2.95,  | (-2.53, | <0.001 |
|                   | 22.81)  | 24.53)  | 0.31)   |        | 113.46)  | 126.41)  | 0.41)   |        | 361.24)  | 183.79)  | -2.13)  |        | 6.62)   | 3.32)   | -2.17)  |        |
| Fiji              | 27.10   | 27.27   | 0.03    |        | 229.70   | 236.74   | 0.10    |        | 1149.71  | 915.92   | -0.70   |        | 20.70   | 16.36   | -0.73   |        |
|                   | (21.53, | (22.17, | (0.02,  | <0.001 | (212.61, | (221.25, | (0.10,  | <0.001 | (1111.07 | (885.18, | (-1.42, | 0.060  | (15.78, | (12.49, | (-1.46, | 0.053  |

|           |         |         |         |        |          |          |         |        |          |          |         |        |         |        |         |        |
|-----------|---------|---------|---------|--------|----------|----------|---------|--------|----------|----------|---------|--------|---------|--------|---------|--------|
|           | 33.71)  | 33.21)  | 0.03)   |        | 247.84)  | 253.04)  | 0.11)   |        | ,        | 947.46)  | 0.03)   |        | 26.68)  | 21.07) | 0.01)   |        |
|           |         |         |         |        |          |          |         |        | 1189.38) |          |         |        |         |        |         |        |
|           | 44.02   | 35.75   | -0.71   |        | 229.28   | 200.47   | -0.47   |        | 226.50   | 59.51    | -4.57   |        | 4.10    | 1.05   | -4.66   |        |
| Finland   | (41.12, | (33.01, | (-0.73, | <0.001 | (222.77, | (194.08, | (-0.48, | <0.001 | (220.11, | (56.08,  | (-5.24, | <0.001 | (3.28,  | (0.64, | (-5.36, | <0.001 |
|           | 47.09)  | 38.67)  | -0.69)  |        | 235.95)  | 207.05)  | -0.45)  |        | 233.06)  | 63.12)   | -3.91)  |        | 5.09)   | 1.65)  | -3.95)  |        |
|           | 28.59   | 25.86   | -0.33   |        | 161.96   | 164.98   | 0.08    |        | 137.58   | 62.70    | -2.69   |        | 2.45    | 1.10   | -2.74   |        |
| France    | (27.90, | (25.17, | (-0.36, | <0.001 | (160.33, | (163.25, | (0.01,  | 0.017  | (136.09, | (61.64,  | (-3.11, | <0.001 | (2.25,  | (0.96, | (-3.17, | <0.001 |
|           | 29.30)  | 26.57)  | -0.30)  |        | 163.61)  | 166.71)  | 0.14)   |        | 139.09)  | 63.77)   | -2.27)  |        | 2.66)   | 1.25)  | -2.30)  |        |
|           | 28.28   | 27.91   | -0.05   |        | 134.04   | 134.46   | 0.01    |        | 303.71   | 204.89   | -1.48   |        | 5.36    | 3.58   | -1.47   |        |
| Gabon     | (22.89, | (24.12, | (-0.06, | <0.001 | (121.64, | (125.84, | (-0.03, | 0.765  | (285.14, | (194.32, | (-1.67, | <0.001 | (3.14,  | (2.31, | (-1.66, | <0.001 |
|           | 34.61)  | 32.13)  | -0.03)  |        | 147.38)  | 143.52)  | 0.04)   |        | 323.21)  | 215.89)  | -1.29)  |        | 8.59)   | 5.33)  | -1.29)  |        |
|           | 28.71   | 31.34   | 0.30    |        | 167.71   | 181.55   | 0.29    |        | 188.46   | 226.28   | 0.69    |        | 3.31    | 3.96   | 0.67    |        |
| Gambia    | (23.16, | (27.62, | (0.28,  | <0.001 | (153.31, | (172.15, | (0.21,  | <0.001 | (173.35, | (215.92, | (-0.40, | 0.215  | (1.58,  | (2.69, | (-0.41, | 0.224  |
|           | 35.30)  | 35.45)  | 0.31)   |        | 183.15)  | 191.35)  | 0.37)   |        | 204.60)  | 237.02)  | 1.78)   |        | 6.19)   | 5.65)  | 1.77)   |        |
|           |         |         |         |        |          |          |         |        | 1104.65  |          |         |        |         |        |         |        |
|           | 36.89   | 38.49   | 0.16    |        | 219.50   | 235.11   | 0.24    |        | (1090.69 | 512.08   | -2.71   |        | 19.73   | 9.14   | -2.71   |        |
| Georgia   | (34.38, | (35.17, | (0.12,  | <0.001 | (213.32, | (226.98, | (0.22,  | <0.001 | (499.96, | (-4.07,  | <0.001  |        | (17.91, | (7.59, | (-4.03, | <0.001 |
|           | 39.53)  | 42.06)  | 0.19)   |        | 225.83)  | 243.50)  | 0.26)   |        | ,        | 524.46)  | -1.33)  |        | 21.70)  | 10.96) | -1.37)  |        |
|           |         |         |         |        |          |          |         |        | 1118.75) |          |         |        |         |        |         |        |
|           | 41.67   | 34.31   | -0.67   |        | 217.32   | 202.58   | -0.24   |        | 290.04   | 79.66    | -4.39   |        | 5.13    | 1.39   | -4.44   |        |
| Germany   | (40.96, | (33.62, | (-0.71, | <0.001 | (215.70, | (200.94, | (-0.31, | <0.001 | (288.16, | (78.63,  | (-4.67, | <0.001 | (4.88,  | (1.26, | (-4.71, | <0.001 |
|           | 42.39)  | 35.02)  | -0.63)  |        | 218.95)  | 204.24)  | -0.18)  |        | 291.94)  | 80.71)   | -4.11)  |        | 5.39)   | 1.54)  | -4.16)  |        |
|           | 26.84   | 28.29   | 0.18    |        | 144.81   | 152.65   | 0.20    |        | 252.65   | 216.62   | -0.52   |        | 4.44    | 3.78   | -0.54   |        |
| Ghana     | (25.43, | (27.38, | (0.10,  | <0.001 | (141.42, | (150.46, | (0.14,  | <0.001 | (248.24, | (214.05, | (-0.84, | 0.001  | (3.87,  | (3.45, | (-0.86, | 0.001  |
|           | 28.31)  | 29.24)  | 0.26)   |        | 148.26)  | 154.86)  | 0.26)   |        | 257.12)  | 219.23)  | -0.20)  |        | 5.07)   | 4.14)  | -0.22)  |        |
|           | 26.98   | 26.29   | -0.08   |        | 145.36   | 161.96   | 0.37    |        | 330.13   | 249.96   | -0.98   |        | 5.83    | 4.46   | -0.96   |        |
| Greece    | (25.36, | (24.51, | (-0.10, | <0.001 | (141.57, | (157.68, | (0.34,  | <0.001 | (324.40, | (244.65, | (-1.84, | 0.027  | (5.09,  | (3.78, | (-1.55, | 0.002  |
|           | 28.69)  | 28.19)  | -0.07)  |        | 149.23)  | 166.34)  | 0.41)   |        | 335.94)  | 255.38)  | -0.12)  |        | 6.64)   | 5.24)  | -0.36)  |        |
|           | 42.61   | 34.12   | -0.76   |        | 161.46   | 147.43   | -0.31   |        | 243.83   | 89.03    | -3.44   |        | 4.42    | 1.60   | -3.47   |        |
| Greenland | (21.66, | (14.01, | (-0.79, | <0.001 | (116.64, | (100.52, | (-0.34, | <0.001 | (187.39, | (53.57,  | (-3.66, | <0.001 | (0.16,  | (0.00, | (-3.71, | <0.001 |
|           | 79.43)  | 72.09)  | -0.72)  |        | 220.91)  | 210.72)  | -0.29)  |        | 314.74)  | 141.31)  | -3.21)  |        | 28.75)  | 25.27) | -3.22)  |        |
|           | 62.55   | 64.92   | 0.13    |        | 318.36   | 334.02   | 0.17    |        | 423.44   | 158.56   | -3.32   |        | 7.57    | 2.77   | -3.38   |        |
| Grenada   | (37.65, | (42.19, | (0.12,  | <0.001 | (256.57, | (277.94, | (0.15,  | <0.001 | (351.71, | (120.69, | (-4.04, | <0.001 | (1.03,  | (0.08, | (-4.10, | <0.001 |
|           | 98.47)  | 96.06)  | 0.14)   |        | 390.96)  | 398.37)  | 0.18)   |        | 505.91)  | 204.84)  | -2.59)  |        | 26.91)  | 15.79) | -2.66)  |        |



|               |         |         |         |        |          |          |         |        |          |          |         |        |         |         |         |        |
|---------------|---------|---------|---------|--------|----------|----------|---------|--------|----------|----------|---------|--------|---------|---------|---------|--------|
|               | 22.03   | 24.89   | 0.42    |        | 188.13   | 226.67   | 0.63    |        | 403.92   | 829.01   | 2.47    |        | 7.12    | 14.86   | 2.53    |        |
| Guam          | (11.97, | (13.76, | (0.40,  | <0.001 | (155.30, | (189.24, | (0.59,  | <0.001 | (355.19, | (755.90, | (2.02,  | <0.001 | (2.08,  | (6.58,  | (2.05,  | <0.001 |
|               | 37.40)  | 41.56)  | 0.44)   |        | 226.00)  | 269.41)  | 0.67)   |        | 457.63)  | 907.34)  | 2.93)   |        | 17.84)  | 28.87)  | 3.01)   |        |
|               | 19.70   | 21.32   | 0.28    |        | 92.12    | 110.45   | 0.63    |        | 872.34   | 379.51   | -2.94   |        | 14.88   | 6.53    | -2.92   |        |
| Guatemala     | (18.02, | (20.27, | (0.26,  | <0.001 | (88.35,  | (107.99, | (0.60,  | <0.001 | (861.09, | (375.06, | (-4.34, | <0.001 | (13.43, | (5.96,  | (-4.34, | <0.001 |
|               | 21.50)  | 22.41)  | 0.31)   |        | 96.02)   | 112.95)  | 0.66)   |        | 883.70)  | 384.01)  | -1.53)  |        | 16.45)  | 7.15)   | -1.48)  |        |
|               | 22.29   | 25.59   | 0.47    |        | 114.77   | 133.09   | 0.53    |        | 172.85   | 241.05   | 1.21    |        | 3.02    | 4.22    | 1.23    |        |
| Guinea        | (20.24, | (24.09, | (0.44,  | <0.001 | (109.96, | (129.52, | (0.48,  | <0.001 | (167.03, | (236.32, | (1.04,  | <0.001 | (2.29,  | (3.61,  | (1.06,  | <0.001 |
|               | 24.49)  | 27.18)  | 0.50)   |        | 119.75)  | 136.74)  | 0.58)   |        | 178.82)  | 245.85)  | 1.38)   |        | 3.91)   | 4.90)   | 1.39)   |        |
|               | 27.78   | 30.04   | 0.27    |        | 145.28   | 156.89   | 0.29    |        | 333.58   | 363.72   | 0.31    |        | 5.91    | 6.44    | 0.30    |        |
| Guinea-Bissau | (22.31, | (26.17, | (0.26,  | <0.001 | (132.01, | (147.60, | (0.18,  | <0.001 | (313.56, | (349.63, | (0.18,  | <0.001 | (3.51,  | (4.68,  | (0.17,  | <0.001 |
|               | 34.24)  | 34.35)  | 0.28)   |        | 159.57)  | 166.63)  | 0.40)   |        | 354.58)  | 378.24)  | 0.43)   |        | 9.39)   | 8.68)   | 0.43)   |        |
|               | 68.12   | 67.46   | -0.03   |        | 308.31   | 305.18   | -0.02   |        | 681.79   | 426.91   | -1.68   |        | 12.04   | 7.57    | -1.67   |        |
| Guyana        | (59.17, | (58.48, | (-0.06, | 0.062  | (288.30, | (285.21, | (-0.06, | 0.284  | (652.23, | (403.38, | (-2.41, | <0.001 | (8.38,  | (4.72,  | (-2.39, | <0.001 |
|               | 78.10)  | 77.48)  | 0.00)   |        | 329.38)  | 326.20)  | 0.02)   |        | 712.38)  | 451.48)  | -0.95)  |        | 16.81)  | 11.53)  | -0.93)  |        |
|               | 64.74   | 65.42   | 0.04    |        | 273.19   | 273.82   | 0.02    |        | 580.52   | 405.91   | -1.23   |        | 10.31   | 7.20    | -1.23   |        |
| Haiti         | (61.45, | (63.24, | (0.00,  | 0.053  | (266.26, | (269.29, | (-0.05, | 0.567  | (570.46, | (400.41, | (-1.48, | <0.001 | (9.00,  | (6.48,  | (-1.48, | <0.001 |
|               | 68.16)  | 67.66)  | 0.07)   |        | 280.26)  | 278.40)  | 0.10)   |        | 590.72)  | 411.47)  | -0.98)  |        | 11.76)  | 7.97)   | -0.99)  |        |
|               | 24.72   | 24.82   | 0.01    |        | 132.86   | 145.44   | 0.31    |        | 465.47   | 181.77   | -3.23   |        | 8.12    | 3.17    | -3.19   |        |
| Honduras      | (22.26, | (23.27, | (-0.00, | 0.087  | (126.91, | (141.55, | (0.28,  | <0.001 | (454.51, | (177.47, | (-3.74, | <0.001 | (6.73,  | (2.62,  | (-3.63, | <0.001 |
|               | 27.39)  | 26.45)  | 0.03)   |        | 139.03)  | 149.42)  | 0.33)   |        | 476.63)  | 186.15)  | -2.71)  |        | 9.74)   | 3.80)   | -2.75)  |        |
|               | 31.35   | 25.64   | -0.69   |        | 259.58   | 210.50   | -0.71   |        | 743.72   | 178.05   | -4.86   |        | 13.51   | 3.16    | -4.95   |        |
| Hungary       | (29.61, | (23.88, | (-0.72, | <0.001 | (254.66, | (205.54, | (-0.75, | <0.001 | (735.48, | (173.53, | (-5.54, | <0.001 | (12.42, | (2.59,  | (-5.64, | <0.001 |
|               | 33.18)  | 27.50)  | -0.67)  |        | 264.58)  | 215.57)  | -0.68)  |        | 752.04)  | 182.68)  | -4.18)  |        | 14.67)  | 3.84)   | -4.25)  |        |
|               | 37.01   | 32.82   | -0.42   |        | 182.44   | 181.22   | -0.04   |        | 235.12   | 89.80    | -3.32   |        | 4.07    | 1.56    | -3.30   |        |
| Iceland       | (26.34, | (23.58, | (-0.51, | <0.001 | (157.60, | (158.69, | (-0.10, | 0.231  | (206.72, | (74.13,  | (-3.70, | <0.001 | (1.17,  | (0.19,  | (-3.81, | <0.001 |
|               | 50.69)  | 44.79)  | -0.33)  |        | 210.19)  | 206.34)  | 0.02)   |        | 266.43)  | 108.09)  | -2.95)  |        | 10.31)  | 6.25)   | -2.79)  |        |
|               | 25.67   | 26.34   | 0.09    |        | 149.16   | 158.35   | 0.21    |        | 774.50   | 679.43   | -0.43   |        | 13.53   | 11.99   | -0.39   |        |
| India         | (25.50, | (26.21, | (0.08,  | <0.001 | (148.73, | (158.03, | (0.19,  | <0.001 | (773.53, | (678.75, | (-1.03, | 0.161  | (13.40, | (11.91, | (-1.03, | 0.235  |
|               | 25.85)  | 26.48)  | 0.10)   |        | 149.60)  | 158.68)  | 0.22)   |        | 775.47)  | 680.10)  | 0.17)   |        | 13.66)  | 12.08)  | 0.25)   |        |
|               | 12.12   | 13.51   | 0.38    |        | 116.42   | 133.13   | 0.47    |        | 608.64   | 534.26   | -0.44   |        | 10.62   | 9.31    | -0.45   |        |
| Indonesia     | (11.86, | (13.29, | (0.28,  | <0.001 | (115.61, | (132.45, | (0.41,  | <0.001 | (606.82, | (532.88, | (-0.61, | <0.001 | (10.38, | (9.13,  | (-0.62, | <0.001 |
|               | 12.38)  | 13.73)  | 0.47)   |        | 117.24)  | 133.82)  | 0.54)   |        | 610.46)  | 535.64)  | -0.27)  |        | 10.87)  | 9.49)   | -0.28)  |        |

|                            |         |         |         |        |          |          |         |        |          |          |         |        |         |         |         |        |
|----------------------------|---------|---------|---------|--------|----------|----------|---------|--------|----------|----------|---------|--------|---------|---------|---------|--------|
| Iran (Islamic Republic of) | 60.45   | 58.97   | -0.09   |        | 328.20   | 332.69   | 0.06    |        | 712.29   | 395.41   | -2.02   |        | 12.38   | 6.73    | -2.09   |        |
|                            | (59.34, | (58.22, | (-0.10, | <0.001 | (325.54, | (330.96, | (0.02,  | 0.002  | (708.50, | (393.41, | (-2.15, | <0.001 | (11.88, | (6.47,  | (-2.23, | <0.001 |
|                            | 61.58)  | 59.73)  | -0.07)  |        | 330.87)  | 334.43)  | 0.10)   |        | 716.10)  | 397.43)  | -1.89)  |        | 12.90)  | 6.99)   | -1.96)  |        |
| Iraq                       | 42.60   | 41.03   | -0.14   |        | 288.93   | 283.38   | -0.04   |        | 735.99   | 363.27   | -2.40   |        | 12.93   | 6.34    | -2.43   |        |
|                            | (40.89, | (40.06, | (-0.16, | <0.001 | (284.37, | (280.78, | (-0.20, | 0.658  | (728.83, | (360.35, | (-2.73, | <0.001 | (11.99, | (5.96,  | (-2.76, | <0.001 |
|                            | 44.36)  | 42.01)  | -0.11)  |        | 293.54)  | 286.00)  | 0.12)   |        | 743.19)  | 366.20)  | -2.08)  |        | 13.92)  | 6.74)   | -2.09)  |        |
| Ireland                    | 34.41   | 28.81   | -0.61   |        | 200.73   | 186.65   | -0.23   |        | 199.01   | 57.80    | -4.17   |        | 3.58    | 1.02    | -4.24   |        |
|                            | (31.33, | (26.28, | (-0.62, | <0.001 | (193.18, | (180.37, | (-0.30, | <0.001 | (191.51, | (54.40,  | (-4.90, | <0.001 | (2.64,  | (0.61,  | (-5.01, | <0.001 |
|                            | 37.73)  | 31.53)  | -0.60)  |        | 208.50)  | 193.10)  | -0.16)  |        | 206.73)  | 61.38)   | -3.45)  |        | 4.76)   | 1.61)   | -3.46)  |        |
| Israel                     | 26.58   | 24.20   | -0.32   |        | 159.63   | 163.30   | 0.08    |        | 236.63   | 52.21    | -5.10   |        | 4.15    | 0.90    | -5.16   |        |
|                            | (24.28, | (22.54, | (-0.36, | <0.001 | (153.95, | (158.96, | (0.03,  | 0.001  | (229.70, | (49.78,  | (-5.77, | <0.001 | (3.28,  | (0.61,  | (-5.84, | <0.001 |
|                            | 29.04)  | 25.96)  | -0.28)  |        | 165.47)  | 167.73)  | 0.12)   |        | 243.71)  | 54.73)   | -4.44)  |        | 5.19)   | 1.29)   | -4.48)  |        |
| Italy                      | 34.93   | 31.26   | -0.38   |        | 197.32   | 188.36   | -0.15   |        | 182.50   | 80.56    | -2.84   |        | 3.20    | 1.40    | -2.86   |        |
|                            | (34.14, | (30.43, | (-0.42, | <0.001 | (195.44, | (186.37, | (-0.19, | <0.001 | (180.69, | (79.25,  | (-3.50, | <0.001 | (2.97,  | (1.23,  | (-3.45, | <0.001 |
|                            | 35.73)  | 32.12)  | -0.34)  |        | 199.22)  | 190.37)  | -0.11)  |        | 184.33)  | 81.88)   | -2.18)  |        | 3.45)   | 1.58)   | -2.26)  |        |
| Jamaica                    | 57.85   | 64.84   | 0.40    |        | 303.99   | 349.13   | 0.47    |        | 121.36   | 127.36   | 0.48    |        | 2.11    | 2.21    | 0.50    |        |
|                            | (52.89, | (60.32, | (0.38,  | <0.001 | (292.06, | (338.40, | (0.43,  | <0.001 | (113.89, | (120.91, | (-0.57, | 0.373  | (1.22,  | (1.43,  | (-0.60, | 0.376  |
|                            | 63.17)  | 69.61)  | 0.43)   |        | 316.30)  | 360.11)  | 0.52)   |        | 129.22)  | 134.07)  | 1.54)   |        | 3.41)   | 3.26)   | 1.61)   |        |
| Japan                      | 22.63   | 20.77   | -0.29   |        | 130.48   | 122.18   | -0.23   |        | 114.49   | 79.80    | -1.21   |        | 1.97    | 1.38    | -1.21   |        |
|                            | (22.19, | (20.29, | (-0.31, | <0.001 | (129.43, | (121.05, | (-0.25, | <0.001 | (113.52, | (78.88,  | (-1.53, | <0.001 | (1.85,  | (1.26,  | (-1.54, | <0.001 |
|                            | 23.08)  | 21.25)  | -0.28)  |        | 131.52)  | 123.31)  | -0.21)  |        | 115.48)  | 80.72)   | -0.89)  |        | 2.11)   | 1.50)   | -0.87)  |        |
| Jordan                     | 40.37   | 38.50   | -0.17   |        | 284.41   | 276.25   | -0.09   |        | 441.72   | 228.60   | -2.19   |        | 7.80    | 3.97    | -2.25   |        |
|                            | (36.76, | (36.75, | (-0.23, | <0.001 | (274.37, | (271.52, | (-0.19, | 0.081  | (429.32, | (224.31, | (-2.67, | <0.001 | (6.22,  | (3.42,  | (-2.73, | <0.001 |
|                            | 44.26)  | 40.30)  | -0.10)  |        | 294.75)  | 281.05)  | 0.01)   |        | 454.41)  | 232.96)  | -1.71)  |        | 9.69)   | 4.58)   | -1.76)  |        |
| Kazakhstan                 | 38.61   | 34.81   | -0.36   |        | 215.85   | 195.31   | -0.34   |        | 698.97   | 320.12   | -2.71   |        | 12.61   | 5.75    | -2.72   |        |
|                            | (37.14, | (33.48, | (-0.42, | <0.001 | (212.36, | (192.17, | (-0.36, | <0.001 | (692.66, | (316.10, | (-3.83, | <0.001 | (11.77, | (5.23,  | (-3.86, | <0.001 |
|                            | 40.11)  | 36.18)  | -0.30)  |        | 219.39)  | 198.48)  | -0.33)  |        | 705.32)  | 324.19)  | -1.58)  |        | 13.49)  | 6.33)   | -1.57)  |        |
| Kenya                      | 26.41   | 26.87   | 0.06    |        | 155.48   | 158.17   | 0.06    |        | 104.22   | 172.19   | 1.75    |        | 1.75    | 2.94    | 1.80    |        |
|                            | (25.21, | (26.14, | (0.04,  | <0.001 | (152.43, | (156.35, | (0.04,  | <0.001 | (101.81, | (170.34, | (1.62,  | <0.001 | (1.45,  | (2.70,  | (1.67,  | <0.001 |
|                            | 27.65)  | 27.61)  | 0.07)   |        | 158.58)  | 160.01)  | 0.08)   |        | 106.68)  | 174.06)  | 1.87)   |        | 2.10)   | 3.19)   | 1.94)   |        |
| Kiribati                   | 27.42   | 28.50   | 0.13    |        | 188.66   | 200.48   | 0.22    |        | 1919.32  | 1783.67  | -0.26   |        | 34.82   | 32.13   | -0.28   |        |
|                            | (11.49, | (15.31, | (0.12,  | <0.001 | (139.79, | (161.54, | (0.19,  | <0.001 | (1755.21 | (1663.53 | (-0.38, | <0.001 | (15.96, | (17.85, | (-0.41, | <0.001 |
|                            | 56.06)  | 48.65)  | 0.14)   |        | 249.56)  | 246.08)  | 0.25)   |        | ,        | ,        | -0.13)  |        | 66.54)  | 53.42)  | -0.16)  |        |

|              |         |         |         |        |          |          |         |          |          |          |         |        |         |         |         |        |
|--------------|---------|---------|---------|--------|----------|----------|---------|----------|----------|----------|---------|--------|---------|---------|---------|--------|
|              |         |         |         |        |          |          |         | 2095.04) | 1910.31) |          |         |        |         |         |         |        |
|              | 39.53   | 38.71   | -0.08   |        | 288.73   | 289.98   | 0.03    | 566.72   | 393.87   | -1.06    |         | 9.79   | 6.83    | -1.03   |         |        |
| Kuwait       | (35.59, | (36.26, | (-0.13, | 0.001  | (277.91, | (283.52, | (-0.06, | 0.525    | (551.32, | (385.96, | (-2.58, | 0.178  | (7.86,  | (5.84,  | (-2.59, | 0.201  |
|              | 43.86)  | 41.33)  | -0.04)  |        | 299.92)  | 296.61)  | 0.11)   |          | 582.50)  | 401.95)  | 0.49)   |        | 12.12)  | 8.01)   | 0.55)   |        |
|              | 35.47   | 32.93   | -0.26   |        | 196.95   | 180.86   | -0.30   |          | 590.43   | 334.51   | -1.87   |        | 10.59   | 6.01    | -1.87   |        |
| Kyrgyzstan   | (32.68, | (30.77, | (-0.27, | <0.001 | (190.18, | (175.69, | (-0.32, | <0.001   | (578.68, | (327.46, | (-3.21, | 0.007  | (9.06,  | (5.10,  | (-3.22, | 0.008  |
|              | 38.45)  | 35.20)  | -0.24)  |        | 203.92)  | 186.14)  | -0.27)  |          | 602.36)  | 341.68)  | -0.52)  |        | 12.31)  | 7.05)   | -0.49)  |        |
| Lao People's | 24.89   | 22.68   | -0.32   |        | 146.69   | 132.50   | -0.34   |          | 503.03   | 520.69   | 0.15    |        | 8.91    | 9.11    | 0.10    |        |
| Democratic   | (22.29, | (21.01, | (-0.33, | <0.001 | (140.16, | (128.38, | (-0.46, | <0.001   | (491.01, | (512.56, | (-0.06, | 0.157  | (7.36,  | (8.06,  | (-0.10, | 0.319  |
| Republic     | 27.72)  | 24.45)  | -0.31)  |        | 153.45)  | 136.73)  | -0.21)  |          | 515.29)  | 528.91)  | 0.35)   |        | 10.69)  | 10.26)  | 0.30)   |        |
|              | 31.24   | 32.02   | 0.08    |        | 194.53   | 201.75   | 0.13    |          | 580.91   | 174.33   | -4.05   |        | 10.61   | 3.13    | -4.11   |        |
| Latvia       | (27.87, | (27.73, | (0.04,  | <0.001 | (186.03, | (191.06, | (0.09,  | <0.001   | (566.18, | (164.50, | (-6.12, | <0.001 | (8.70,  | (1.94,  | (-6.22, | <0.001 |
|              | 34.92)  | 36.89)  | 0.12)   |        | 203.35)  | 212.99)  | 0.17)   |          | 595.95)  | 184.71)  | -1.94)  |        | 12.83)  | 4.93)   | -1.94)  |        |
|              | 35.37   | 36.85   | 0.14    |        | 236.25   | 257.03   | 0.30    |          | 1101.93  | 726.04   | -1.41   |        | 19.26   | 12.51   | -1.46   |        |
| Lebanon      | (31.88, | (34.37, | (0.12,  | <0.001 | (226.96, | (250.48, | (0.24,  | <0.001   | (1082.12 | (714.68, | (-1.56, | <0.001 | (16.71, | (11.06, | (-1.61, | <0.001 |
|              | 39.14)  | 39.48)  | 0.16)   |        | 245.84)  | 263.74)  | 0.36)   |          | '        | 737.55)  | -1.26)  |        | 22.11)  | 14.11)  | -1.31)  |        |
|              |         |         |         |        |          |          |         |          | 1122.03) |          |         |        |         |         |         |        |
|              | 28.27   | 31.42   | 0.36    |        | 113.58   | 133.35   | 0.55    |          | 101.40   | 248.70   | 3.24    |        | 1.78    | 4.44    | 3.32    |        |
| Lesotho      | (24.12, | (27.88, | (0.34,  | <0.001 | (104.84, | (125.85, | (0.51,  | <0.001   | (93.22,  | (238.43, | (2.97,  | <0.001 | (0.84,  | (3.16,  | (3.03,  | <0.001 |
|              | 32.97)  | 35.29)  | 0.38)   |        | 122.88)  | 141.17)  | 0.58)   |          | 110.13)  | 259.29)  | 3.51)   |        | 3.32)   | 6.07)   | 3.61)   |        |
|              | 27.81   | 30.42   | 0.30    |        | 157.60   | 171.26   | 0.30    |          | 213.59   | 203.27   | -0.21   |        | 3.75    | 3.56    | -0.22   |        |
| Liberia      | (23.81, | (27.92, | (0.28,  | <0.001 | (147.87, | (165.15, | (0.17,  | <0.001   | (202.33, | (196.69, | (-0.45, | 0.088  | (2.39,  | (2.73,  | (-0.47, | 0.074  |
|              | 32.31)  | 33.09)  | 0.33)   |        | 167.83)  | 177.54)  | 0.44)   |          | 225.32)  | 210.01)  | 0.03)   |        | 5.62)   | 4.56)   | 0.02)   |        |
|              | 34.67   | 37.11   | 0.22    |        | 225.48   | 251.76   | 0.39    |          | 871.09   | 691.13   | -0.90   |        | 14.99   | 11.89   | -0.90   |        |
| Libya        | (31.59, | (35.03, | (0.15,  | <0.001 | (217.35, | (246.36, | (0.31,  | <0.001   | (855.68, | (682.00, | (-1.57, | 0.010  | (13.01, | (10.72, | (-1.60, | 0.012  |
|              | 37.97)  | 39.28)  | 0.29)   |        | 233.84)  | 257.24)  | 0.47)   |          | 886.72)  | 700.36)  | -0.22)  |        | 17.20)  | 13.16)  | -0.20)  |        |
|              | 32.65   | 30.30   | -0.27   |        | 198.79   | 181.81   | -0.30   |          | 566.41   | 240.55   | -3.03   |        | 10.30   | 4.35    | -3.04   |        |
| Lithuania    | (29.74, | (26.81, | (-0.31, | <0.001 | (191.51, | (173.16, | (-0.33, | <0.001   | (554.05, | (230.62, | (-4.31, | <0.001 | (8.69,  | (3.11,  | (-4.34, | <0.001 |
|              | 35.77)  | 34.17)  | -0.23)  |        | 206.29)  | 190.83)  | -0.27)  |          | 578.98)  | 250.84)  | -1.73)  |        | 12.13)  | 5.99)   | -1.73)  |        |
|              | 23.36   | 21.50   | -0.28   |        | 145.29   | 151.77   | 0.18    |          | 231.01   | 66.61    | -4.25   |        | 4.07    | 1.15    | -4.33   |        |
| Luxembourg   | (16.47, | (15.92, | (-0.30, | <0.001 | (127.43, | (136.73, | (0.03,  | 0.017    | (208.00, | (56.72,  | (-4.92, | <0.001 | (1.57,  | (0.22,  | (-5.01, | <0.001 |
|              | 32.68)  | 28.69)  | -0.25)  |        | 165.39)  | 168.30)  | 0.33)   |          | 256.27)  | 78.01)   | -3.59)  |        | 9.33)   | 4.08)   | -3.65)  |        |
| Madagascar   | 24.96   | 27.19   | 0.29    | <0.001 | 140.32   | 154.67   | 0.34    | <0.001   | 472.29   | 383.36   | -0.66   | 0.006  | 8.30    | 6.73    | -0.67   | 0.006  |

|                   |         |         |         |        |          |          |         |        |          |           |         |        |         |         |         |        |
|-------------------|---------|---------|---------|--------|----------|----------|---------|--------|----------|-----------|---------|--------|---------|---------|---------|--------|
|                   | (23.41, | (26.16, | (0.27,  |        | (136.48, | (152.12, | (0.31,  |        | (465.38, | (379.42,  | (-1.13, |        | (7.40,  | (6.21,  | (-1.14, |        |
|                   | 26.60)  | 28.26)  | 0.31)   |        | 144.25)  | 157.25)  | 0.37)   |        | 479.28)  | 387.34)   | -0.19)  |        | 9.29)   | 7.28)   | -0.19)  |        |
|                   | 29.30   | 29.68   | 0.04    |        | 160.99   | 163.33   | 0.07    |        | 294.35   | 256.52    | -0.42   |        | 5.06    | 4.41    | -0.42   |        |
| Malawi            | (27.41, | (28.37, | (0.03,  | <0.001 | (156.34, | (160.13, | (-0.03, | 0.160  | (288.27, | (252.63,  | (-0.63, | <0.001 | (4.29,  | (3.91,  | (-0.63, | <0.001 |
|                   | 31.29)  | 31.05)  | 0.05)   |        | 165.73)  | 166.59)  | 0.16)   |        | 300.53)  | 260.46)   | -0.20)  |        | 5.95)   | 4.96)   | -0.21)  |        |
|                   | 25.92   | 26.26   | 0.05    |        | 203.21   | 208.80   | 0.11    |        | 285.51   | 390.16    | 1.12    |        | 5.01    | 6.92    | 1.17    |        |
| Malaysia          | (24.74, | (25.42, | (0.02,  | 0.002  | (199.84, | (206.40, | (0.03,  | 0.008  | (281.52, | (386.88,  | (0.30,  | 0.007  | (4.49,  | (6.49,  | (0.34,  | 0.006  |
|                   | 27.15)  | 27.13)  | 0.08)   |        | 206.63)  | 211.22)  | 0.19)   |        | 289.54)  | 393.46)   | 1.95)   |        | 5.57)   | 7.38)   | 2.01)   |        |
|                   | 24.13   | 23.79   | -0.06   |        | 179.67   | 176.28   | -0.06   |        | 723.77   | 257.79    | -3.46   |        | 12.87   | 4.47    | -3.55   |        |
| Maldives          | (13.53, | (18.46, | (-0.08, | <0.001 | (146.95, | (161.59, | (-0.08, | <0.001 | (657.14, | (239.50,  | (-4.08, | <0.001 | (5.39,  | (2.38,  | (-4.16, | <0.001 |
|                   | 40.45)  | 30.70)  | -0.04)  |        | 217.90)  | 192.40)  | -0.05)  |        | 795.72)  | 277.52)   | -2.84)  |        | 26.48)  | 8.37)   | -2.93)  |        |
|                   | 24.29   | 25.46   | 0.16    |        | 124.26   | 129.05   | 0.14    |        | 222.94   | 195.06    | -0.42   |        | 3.90    | 3.39    | -0.44   |        |
| Mali              | (22.44, | (24.26, | (0.15,  | <0.001 | (119.92, | (126.23, | (0.09,  | <0.001 | (217.23, | (191.69,  | (-0.70, | 0.004  | (3.17,  | (2.96,  | (-0.72, | 0.003  |
|                   | 26.26)  | 26.71)  | 0.18)   |        | 128.71)  | 131.92)  | 0.20)   |        | 228.77)  | 198.48)   | -0.14)  |        | 4.75)   | 3.88)   | -0.15)  |        |
|                   | 24.56   | 21.58   | -0.44   |        | 157.96   | 152.92   | -0.09   |        | 238.31   | 131.03    | -2.09   |        | 4.14    | 2.29    | -2.06   |        |
| Malta             | (17.16, | (14.80, | (-0.48, | <0.001 | (138.56, | (134.32, | (-0.24, | 0.229  | (214.01, | (113.66,  | (-2.72, | <0.001 | (1.54,  | (0.57,  | (-2.65, | <0.001 |
|                   | 34.30)  | 31.00)  | -0.41)  |        | 179.54)  | 173.89)  | 0.06)   |        | 264.83)  | 150.80)   | -1.45)  |        | 9.30)   | 7.17)   | -1.47)  |        |
|                   | 24.70   | 25.44   | 0.10    |        | 176.87   | 187.14   | 0.19    |        | 1018.50  | 1499.96   | 1.40    |        | 18.15   | 27.11   | 1.46    |        |
| Marshall Islands  | (6.29,  | (9.35,  | (0.09,  | <0.001 | (115.06, | (136.20, | (0.19,  | <0.001 | (861.59, | (1348.14, | (1.23,  | <0.001 | (3.23,  | (10.39, | (1.27,  | <0.001 |
|                   | 66.98)  | 55.59)  | 0.12)   |        | 260.69)  | 251.09)  | 0.20)   |        | 1196.38) | ,         | 1.57)   |        | 57.74)  | 57.82)  | 1.66)   |        |
|                   | 27.67   | 28.87   | 0.14    |        | 161.70   | 167.55   | 0.13    |        | 237.66   | 135.89    | -1.84   |        | 4.18    | 2.35    | -1.90   |        |
| Mauritania        | (23.85, | (26.12, | (0.13,  | <0.001 | (152.01, | (160.64, | (0.08,  | <0.001 | (226.04, | (129.77,  | (-1.96, | <0.001 | (2.76,  | (1.61,  | (-2.02, | <0.001 |
|                   | 31.96)  | 31.85)  | 0.15)   |        | 171.85)  | 174.70)  | 0.18)   |        | 249.74)  | 142.23)   | -1.72)  |        | 6.09)   | 3.34)   | -1.77)  |        |
|                   | 25.18   | 22.92   | -0.32   |        | 196.45   | 176.51   | -0.36   |        | 779.84   | 353.83    | -2.62   |        | 14.04   | 6.26    | -2.68   |        |
| Mauritius         | (20.96, | (18.86, | (-0.34, | <0.001 | (184.25, | (164.99, | (-0.39, | <0.001 | (755.28, | (337.41,  | (-3.11, | <0.001 | (10.91, | (4.25,  | (-3.18, | <0.001 |
|                   | 30.02)  | 27.63)  | -0.31)  |        | 209.27)  | 188.66)  | -0.33)  |        | 805.00)  | 370.87)   | -2.13)  |        | 17.79)  | 8.93)   | -2.17)  |        |
|                   | 26.93   | 24.31   | -0.35   |        | 162.70   | 150.30   | -0.27   |        | 252.46   | 299.62    | 0.64    |        | 4.39    | 5.19    | 0.61    |        |
| Mexico            | (26.35, | (23.88, | (-0.36, | <0.001 | (161.23, | (149.23, | (-0.30, | <0.001 | (250.67, | (298.11,  | (0.08,  | 0.025  | (4.16,  | (4.99,  | (0.04,  | 0.035  |
|                   | 27.52)  | 24.74)  | -0.33)  |        | 164.17)  | 151.38)  | -0.25)  |        | 254.27)  | 301.14)   | 1.20)   |        | 4.64)   | 5.39)   | 1.19)   |        |
| Micronesia        | 25.98   | 24.63   | -0.19   |        | 184.38   | 175.61   | -0.18   |        | 1422.99  | 1488.85   | 0.16    |        | 25.88   | 26.67   | 0.11    |        |
| (Federated States | (11.96, | (11.45, | (-0.20, | <0.001 | (141.62, | (135.35, | (-0.20, | <0.001 | (1298.87 | (1367.05  | (0.08,  | <0.001 | (11.67, | (12.67, | (0.02,  | 0.016  |
| of)               | 49.60)  | 46.65)  | -0.17)  |        | 236.25)  | 224.28)  | -0.15)  |        | ,        | ,         | 0.25)   |        | 49.90)  | 49.60)  | 0.20)   |        |

|             |         |         |         |        |          |          |         |          |           |           |         |        |         |         |         |        |
|-------------|---------|---------|---------|--------|----------|----------|---------|----------|-----------|-----------|---------|--------|---------|---------|---------|--------|
|             |         |         |         |        |          |          |         | 1555.99) | 1618.78)  |           |         |        |         |         |         |        |
|             | 30.14   | 26.39   | -0.46   |        | 169.36   | 165.64   | -0.07   | 192.93   | 107.83    | -1.99     |         | 3.41   | 1.90    | -2.01   |         |        |
| Monaco      | (6.22,  | (4.46,  | (-0.47, | <0.001 | (99.75,  | (96.07,  | (-0.11, | <0.001   | (117.56,  | (53.69,   | (-2.08, | <0.001 | (0.00,  | (0.00,  | (-2.12, | <0.001 |
|             | 104.42) | 87.70)  | -0.44)  |        | 280.78)  | 269.43)  | -0.04)  |          | 309.86)   | 196.95)   | -1.90)  |        | 66.28)  | 47.70)  | -1.89)  |        |
|             | 39.21   | 38.81   | -0.02   |        | 213.09   | 217.14   | 0.08    |          | 847.31    | 747.46    | -0.39   |        | 15.04   | 13.33   | -0.38   |        |
| Mongolia    | (34.82, | (35.69, | (-0.06, | 0.139  | (202.27, | (209.76, | (-0.00, | 0.054    | (825.96,  | (733.62,  | (-0.93, | 0.156  | (12.29, | (11.54, | (-0.92, | 0.182  |
|             | 44.04)  | 42.16)  | 0.01)   |        | 224.36)  | 224.74)  | 0.17)   |          | 869.11)   | 761.52)   | 0.15)   |        | 18.26)  | 15.36)  | 0.18)   |        |
|             | 26.90   | 24.37   | -0.34   |        | 220.19   | 201.92   | -0.30   |          | 419.11    | 196.91    | -2.89   |        | 7.44    | 3.47    | -2.91   |        |
| Montenegro  | (20.91, | (18.31, | (-0.35, | <0.001 | (202.35, | (183.98, | (-0.32, | <0.001   | (394.36,  | (179.23,  | (-4.83, | 0.004  | (4.48,  | (1.51,  | (-4.83, | 0.004  |
|             | 34.11)  | 31.90)  | -0.33)  |        | 239.20)  | 221.25)  | -0.28)  |          | 445.04)   | 215.97)   | -0.91)  |        | 11.66)  | 7.02)   | -0.94)  |        |
|             | 38.75   | 37.30   | -0.13   |        | 268.57   | 265.40   | -0.03   |          | 801.55    | 483.03    | -1.69   |        | 14.09   | 8.39    | -1.73   |        |
| Morocco     | (37.49, | (36.32, | (-0.17, | <0.001 | (265.16, | (262.79, | (-0.10, | 0.473    | (795.74,  | (479.50,  | (-1.96, | <0.001 | (13.32, | (7.93,  | (-2.01, | <0.001 |
|             | 40.05)  | 38.30)  | -0.10)  |        | 272.01)  | 268.04)  | 0.05)   |          | 807.39)   | 486.59)   | -1.42)  |        | 14.89)  | 8.87)   | -1.45)  |        |
|             | 29.27   | 30.58   | 0.15    |        | 152.64   | 162.72   | 0.24    |          | 158.14    | 240.18    | 1.48    |        | 2.71    | 4.15    | 1.51    |        |
| Mozambique  | (27.63, | (29.47, | (0.13,  | <0.001 | (148.79, | (160.05, | (0.12,  | <0.001   | (154.31,  | (237.03,  | (1.31,  | <0.001 | (2.23,  | (3.74,  | (1.34,  | <0.001 |
|             | 30.99)  | 31.73)  | 0.17)   |        | 156.56)  | 165.43)  | 0.37)   |          | 162.04)   | 243.35)   | 1.64)   |        | 3.27)   | 4.59)   | 1.67)   |        |
|             | 26.27   | 23.40   | -0.40   |        | 153.06   | 135.31   | -0.41   |          | 728.93    | 367.21    | -2.37   |        | 12.69   | 6.23    | -2.46   |        |
| Myanmar     | (25.47, | (22.77, | (-0.41, | <0.001 | (151.07, | (133.77, | (-0.53, | <0.001   | (724.67,  | (364.68,  | (-2.52, | <0.001 | (12.13, | (5.90,  | (-2.61, | <0.001 |
|             | 27.10)  | 24.05)  | -0.39)  |        | 155.07)  | 136.86)  | -0.30)  |          | 733.21)   | 369.76)   | -2.22)  |        | 13.27)  | 6.57)   | -2.32)  |        |
|             | 31.24   | 29.65   | -0.18   |        | 150.01   | 144.54   | -0.15   |          | 138.64    | 143.41    | 0.20    |        | 2.44    | 2.52    | 0.20    |        |
| Namibia     | (26.35, | (26.31, | (-0.19, | <0.001 | (138.64, | (136.87, | (-0.26, | 0.009    | (127.78,  | (135.79,  | (-0.23, | 0.368  | (1.19,  | (1.60,  | (-0.24, | 0.381  |
|             | 36.82)  | 33.33)  | -0.17)  |        | 162.09)  | 152.53)  | -0.04)  |          | 150.20)   | 151.36)   | 0.62)   |        | 4.47)   | 3.79)   | 0.63)   |        |
|             | 25.89   | 26.53   | 0.08    |        | 189.66   | 195.96   | 0.11    |          | 1834.85   | 2153.23   |         |        | 33.20   | 38.71   | 0.53    |        |
| Nauru       | (0.63,  | (0.97,  | (0.08,  | <0.001 | (76.68,  | (85.40,  | (0.10,  | <0.001   | (1426.26, | (1731.72, | (0.44,  | <0.001 | (1.53,  | (3.22,  | (0.41,  | <0.001 |
|             | 150.88) | 140.93) | 0.09)   |        | 391.76)  | 385.94)  | 0.13)   |          | ,         | ,         | 0.68)   |        | 163.91) | 161.65) | 0.66)   |        |
|             | 24.73   | 22.42   | -0.34   |        | 153.63   | 139.20   | -0.34   |          | 2325.72)  | 2647.98)  |         |        |         |         |         |        |
| Nepal       | (23.54, | (21.58, | (-0.35, | <0.001 | (150.58, | (137.03, | (-0.37, | <0.001   | 466.08    | 356.09    | -0.92   |        | 8.21    | 6.18    | -0.97   |        |
|             | 25.97)  | 23.29)  | -0.32)  |        | 156.74)  | 141.38)  | -0.31)  |          | (460.82,  | (352.70,  | (-1.07, | <0.001 | (7.52,  | (5.74,  | (-1.13, | <0.001 |
|             | 51.39   | 44.47   | -0.49   |        | 239.15   | 240.67   | -0.01   |          | 471.39)   | 359.50)   | -0.77)  |        | 8.95)   | 6.65)   | -0.82)  |        |
| Netherlands | (49.63, | (42.71, | (-0.52, | <0.001 | (235.35, | (236.60, | (-0.11, | 0.906    | 192.94    | 55.43     | -4.27   |        | 3.46    | 0.96    | -4.40   |        |
|             | 53.20)  | 46.28)  | -0.46)  |        | 242.99)  | 244.80)  | 0.10)   |          | (189.53,  | (53.49,   | (-4.55, | <0.001 | (3.02,  | (0.72,  | (-4.69, | <0.001 |
|             | 45.67   | 37.15   | -0.69   |        | 212.02   | 193.06   | -0.32   |          | 196.40)   | 57.43)    | -4.00)  |        | 3.95)   | 1.26)   | -4.11)  |        |
| New Zealand | 45.67   | 37.15   | -0.69   | <0.001 | 212.02   | 193.06   | -0.32   | <0.001   | 226.66    | 89.32     | -3.12   | <0.001 | 4.06    | 1.60    | -3.12   | <0.001 |

|                          |         |         |         |        |          |          |         |        |          |           |         |        |         |         |         |        |
|--------------------------|---------|---------|---------|--------|----------|----------|---------|--------|----------|-----------|---------|--------|---------|---------|---------|--------|
|                          | (42.19, | (34.07, | (-0.77, |        | (204.44, | (185.97, | (-0.38, |        | (218.82, | (84.54,   | (-3.75, |        | (3.07,  | (1.02,  | (-3.76, |        |
|                          | 49.36)  | 40.45)  | -0.62)  |        | 219.81)  | 200.34)  | -0.27)  |        | 234.72)  | 94.32)    | -2.47)  |        | 5.27)   | 2.40)   | -2.47)  |        |
|                          | 24.19   | 24.09   | -0.01   |        | 143.69   | 154.10   | 0.24    |        | 241.17   | 190.63    | -1.10   |        | 4.18    | 3.22    | -1.21   |        |
| Nicaragua                | (21.53, | (22.29, | (-0.05, | 0.664  | (136.86, | (149.42, | (0.22,  | <0.001 | (232.53, | (185.48,  | (-1.98, | 0.015  | (3.10,  | (2.58,  | (-2.10, | 0.009  |
|                          | 27.11)  | 26.01)  | 0.03)   |        | 150.80)  | 158.90)  | 0.26)   |        | 250.06)  | 195.88)   | -0.22)  |        | 5.53)   | 3.97)   | -0.30)  |        |
|                          | 24.55   | 26.18   | 0.21    |        | 133.18   | 139.72   | 0.18    |        | 200.06   | 192.14    | -0.08   |        | 3.50    | 3.36    | -0.09   |        |
| Niger                    | (22.59, | (24.95, | (0.18,  | <0.001 | (128.40, | (136.72, | (0.11,  | <0.001 | (194.31, | (188.72,  | (-0.40, | 0.603  | (2.77,  | (2.91,  | (-0.41, | 0.599  |
|                          | 26.64)  | 27.47)  | 0.25)   |        | 138.10)  | 142.77)  | 0.25)   |        | 205.95)  | 195.62)   | 0.23)   |        | 4.37)   | 3.85)   | 0.24)   |        |
|                          | 23.50   | 25.50   | 0.28    |        | 126.31   | 138.37   | 0.32    |        | 192.09   | 163.14    | -0.60   |        | 3.38    | 2.85    | -0.62   |        |
| Nigeria                  | (22.95, | (25.13, | (0.24,  | <0.001 | (124.99, | (137.48, | (0.28,  | <0.001 | (190.48, | (162.19,  | (-0.97, | 0.002  | (3.17,  | (2.73,  | (-0.99, | 0.001  |
|                          | 24.06)  | 25.87)  | 0.32)   |        | 127.65)  | 139.26)  | 0.35)   |        | 193.70)  | 164.10)   | -0.22)  |        | 3.60)   | 2.98)   | -0.24)  |        |
|                          | 25.06   | 25.38   | 0.04    |        | 205.75   | 214.84   | 0.14    |        | 976.71   | 756.41    | -0.89   |        | 17.58   | 13.40   | -0.95   |        |
| Niue                     | (0.00,  | (0.00,  | (0.03,  | <0.001 | (14.71,  | (8.73,   | (0.12,  | <0.001 | (395.83, | (211.86,  | (-1.16, | <0.001 | (0.00,  | (0.00,  | (-1.21, | <0.001 |
|                          | 567.73) | 781.63) | 0.06)   |        | 888.85)  | 1116.21) | 0.17)   |        | 2007.59) | 1941.64)  | -0.62)  |        | 553.58) | 758.38) | -0.68)  |        |
|                          | 23.53   | 21.63   | -0.30   |        | 183.84   | 172.13   | -0.23   |        | 503.82   | 293.95    | -1.71   |        | 8.88    | 5.16    | -1.71   |        |
| North Macedonia          | (20.33, | (18.61, | (-0.32, | <0.001 | (174.70, | (163.57, | (-0.25, | <0.001 | (488.61, | (282.58,  | (-2.60, | <0.001 | (6.97,  | (3.76,  | (-2.64, | <0.001 |
|                          | 27.10)  | 25.08)  | -0.27)  |        | 193.33)  | 181.08)  | -0.21)  |        | 519.40)  | 305.73)   | -0.81)  |        | 11.17)  | 7.00)   | -0.76)  |        |
|                          | 22.82   | 24.93   | 0.38    |        | 192.31   | 217.54   | 0.45    |        | 449.60   | 472.81    | 0.38    |        | 8.07    | 8.45    | 0.40    |        |
| Northern Mariana Islands | (8.02,  | (4.32,  | (0.12,  | 0.004  | (141.58, | (134.95, | (0.26,  | <0.001 | (370.06, | (345.63,  | (-0.17, | 0.173  | (0.98,  | (0.10,  | (-0.21, | 0.200  |
|                          | 53.64)  | 83.57)  | 0.65)   |        | 257.14)  | 334.24)  | 0.64)   |        | 542.86)  | 633.36)   | 0.94)   |        | 32.67)  | 58.71)  | 1.00)   |        |
|                          | 32.38   | 27.72   | -0.53   |        | 181.67   | 168.62   | -0.25   |        | 208.47   | 45.34     | -5.08   |        | 3.72    | 0.78    | -5.22   |        |
| Norway                   | (29.69, | (25.37, | (-0.56, | <0.001 | (175.25, | (162.84, | (-0.28, | <0.001 | (201.59, | (42.38,   | (-5.74, | <0.001 | (2.86,  | (0.44,  | (-5.91, | <0.001 |
|                          | 35.26)  | 30.24)  | -0.51)  |        | 188.28)  | 174.58)  | -0.23)  |        | 215.53)  | 48.48)    | -4.41)  |        | 4.78)   | 1.31)   | -4.53)  |        |
|                          | 38.63   | 42.99   | 0.37    |        | 256.96   | 304.11   | 0.61    |        | 710.35   | 353.67    | -2.35   |        | 12.47   | 6.00    | -2.51   |        |
| Oman                     | (34.49, | (40.62, | (0.18,  | <0.001 | (246.05, | (297.89, | (0.45,  | <0.001 | (692.09, | (346.37,  | (-2.89, | <0.001 | (10.15, | (5.09,  | (-2.84, | <0.001 |
|                          | 43.16)  | 45.51)  | 0.57)   |        | 268.23)  | 310.49)  | 0.77)   |        | 728.99)  | 361.13)   | -1.80)  |        | 15.17)  | 7.07)   | -2.18)  |        |
|                          | 28.75   | 29.85   | 0.13    |        | 182.68   | 189.58   | 0.13    |        | 633.52   | 1049.63   | 1.79    |        | 11.24   | 18.48   | 1.77    |        |
| Pakistan                 | (28.18, | (29.48, | (0.11,  | <0.001 | (181.21, | (188.61, | (0.12,  | <0.001 | (630.82, | (1047.39, | (1.60,  | <0.001 | (10.88, | (18.18, | (1.58,  | <0.001 |
|                          | 29.32)  | 30.23)  | 0.14)   |        | 184.16)  | 190.55)  | 0.15)   |        | 636.23)  | '         | 1.98)   |        | 11.60)  | 18.78)  | 1.95)   |        |
|                          | 25.36   | 26.83   | 0.19    |        | 198.16   | 213.27   | 0.26    |        | 1123.00  | 1231.94   | 0.21    |        | 20.22   | 22.13   | 0.20    |        |
| Palau                    | (2.34,  | (2.61,  | (0.17,  | <0.001 | (105.60, | (118.46, | (0.24,  | <0.001 | (881.76, | (982.69,  | (-0.21, | 0.318  | (1.11,  | (1.65,  | (-0.24, | 0.371  |
|                          | 103.22) | 113.23) | 0.22)   |        | 339.86)  | 360.44)  | 0.27)   |        | 1410.85) | 1530.19)  | 0.64)   |        | 95.33)  | 104.90) | 0.64)   |        |

|                   |         |         |         |        |          |          |         |        |          |          |         |        |         |         |         |        |
|-------------------|---------|---------|---------|--------|----------|----------|---------|--------|----------|----------|---------|--------|---------|---------|---------|--------|
|                   | 38.04   | 38.00   | -0.00   |        | 260.71   | 268.40   | 0.11    |        | 528.39   | 320.23   | -1.75   |        | 9.30    | 5.58    | -1.78   |        |
| Palestine         | (33.22, | (35.21, | (-0.02, | 0.635  | (247.42, | (260.74, | (0.05,  | 0.001  | (509.75, | (311.98, | (-2.17, | <0.001 | (6.95,  | (4.53,  | (-2.18, | <0.001 |
|                   | 43.41)  | 40.95)  | 0.01)   |        | 274.56)  | 276.22)  | 0.18)   |        | 547.58)  | 328.65)  | -1.33)  |        | 12.23)  | 6.81)   | -1.38)  |        |
|                   | 22.57   | 22.59   | 0.01    |        | 128.87   | 140.71   | 0.30    |        | 209.02   | 117.49   | -1.94   |        | 3.64    | 2.03    | -1.96   |        |
| Panama            | (19.61, | (20.31, | (-0.02, | 0.496  | (121.45, | (134.89, | (0.25,  | <0.001 | (199.69, | (112.19, | (-2.63, | <0.001 | (2.50,  | (1.39,  | (-2.67, | <0.001 |
|                   | 25.88)  | 25.07)  | 0.04)   |        | 136.63)  | 146.71)  | 0.35)   |        | 218.70)  | 122.98)  | -1.24)  |        | 5.15)   | 2.87)   | -1.24)  |        |
|                   | 25.82   | 26.31   | 0.06    |        | 189.01   | 197.48   | 0.15    |        | 530.18   | 658.64   | 0.70    |        | 9.55    | 11.81   | 0.68    |        |
| Papua New Guinea  | (23.27, | (24.72, | (0.04,  | <0.001 | (181.81, | (193.00, | (0.14,  | <0.001 | (518.04, | (650.45, | (0.54,  | <0.001 | (7.97,  | (10.74, | (0.52,  | <0.001 |
|                   | 28.59)  | 27.98)  | 0.08)   |        | 196.43)  | 202.03)  | 0.16)   |        | 542.53)  | 666.91)  | 0.86)   |        | 11.35)  | 12.97)  | 0.85)   |        |
|                   | 16.50   | 16.64   | 0.04    |        | 146.79   | 158.55   | 0.27    |        | 249.33   | 197.17   | -0.62   |        | 4.38    | 3.40    | -0.67   |        |
| Paraguay          | (14.48, | (15.20, | (0.01,  | 0.002  | (140.47, | (153.98, | (0.24,  | <0.001 | (241.13, | (192.09, | (-1.34, | 0.096  | (3.35,  | (2.77,  | (-1.40, | 0.071  |
|                   | 18.73)  | 18.18)  | 0.06)   |        | 153.34)  | 163.22)  | 0.29)   |        | 257.75)  | 202.35)  | 0.11)   |        | 5.63)   | 4.15)   | 0.06)   |        |
|                   | 9.74    | 9.59    | -0.04   |        | 78.95    | 80.13    | 0.05    |        | 373.44   | 184.50   | -2.24   |        | 6.38    | 3.11    | -2.29   |        |
| Peru              | (9.07,  | (9.08,  | (-0.14, | 0.428  | (76.94,  | (78.64,  | (0.03,  | <0.001 | (369.21, | (182.23, | (-3.46, | <0.001 | (5.84,  | (2.82,  | (-3.51, | <0.001 |
|                   | 10.45)  | 10.12)  | 0.06)   |        | 81.00)   | 81.64)   | 0.07)   |        | 377.70)  | 186.79)  | -1.01)  |        | 6.97)   | 3.42)   | -1.05)  |        |
|                   | 41.23   | 41.92   | 0.06    |        | 210.30   | 228.73   | 0.29    |        | 261.64   | 800.45   | 4.01    |        | 4.56    | 14.00   | 4.03    |        |
| Philippines       | (40.40, | (41.32, | (0.04,  | <0.001 | (208.39, | (227.31, | (0.25,  | <0.001 | (259.53, | (797.81, | (3.43,  | <0.001 | (4.28,  | (13.65, | (3.41,  | <0.001 |
|                   | 42.07)  | 42.53)  | 0.07)   |        | 212.23)  | 230.17)  | 0.34)   |        | 263.76)  | 803.11)  | 4.59)   |        | 4.85)   | 14.36)  | 4.65)   |        |
|                   | 14.78   | 13.51   | -0.31   |        | 149.02   | 144.06   | -0.10   |        | 624.06   | 98.68    | -6.32   |        | 11.34   | 1.73    | -6.44   |        |
| Poland            | (14.18, | (12.90, | (-0.34, | <0.001 | (147.16, | (142.16, | (-0.22, | 0.094  | (620.28, | (97.13,  | (-7.34, | <0.001 | (10.84, | (1.53,  | (-7.50, | <0.001 |
|                   | 15.39)  | 14.14)  | -0.28)  |        | 150.91)  | 145.99)  | 0.02)   |        | 627.86)  | 100.25)  | -5.28)  |        | 11.86)  | 1.95)   | -5.36)  |        |
|                   | 14.05   | 12.42   | -0.42   |        | 116.59   | 138.21   | 0.69    |        | 253.00   | 70.99    | -4.34   |        | 4.46    | 1.26    | -4.33   |        |
| Portugal          | (12.87, | (11.22, | (-0.48, | <0.001 | (113.15, | (134.27, | (0.16,  | 0.011  | (247.93, | (68.21,  | (-5.21, | <0.001 | (3.81,  | (0.91,  | (-5.24, | <0.001 |
|                   | 15.30)  | 13.71)  | -0.37)  |        | 120.10)  | 142.24)  | 1.22)   |        | 258.15)  | 73.85)   | -3.46)  |        | 5.19)   | 1.70)   | -3.41)  |        |
|                   | 61.00   | 62.68   | 0.09    |        | 323.19   | 331.35   | 0.08    |        | 265.84   | 120.23   | -2.88   |        | 4.68    | 2.07    | -2.94   |        |
| Puerto Rico       | (56.95, | (58.19, | (0.07,  | <0.001 | (313.72, | (321.00, | (0.06,  | <0.001 | (257.27, | (114.03, | (-4.12, | <0.001 | (3.60,  | (1.33,  | (-4.25, | <0.001 |
|                   | 65.27)  | 67.45)  | 0.12)   |        | 332.88)  | 341.96)  | 0.11)   |        | 274.62)  | 126.69)  | -1.63)  |        | 5.98)   | 3.09)   | -1.60)  |        |
|                   | 36.89   | 34.92   | -0.20   |        | 247.54   | 236.82   | -0.16   |        | 355.00   | 141.89   | -3.01   |        | 6.10    | 2.39    | -3.06   |        |
| Qatar             | (29.99, | (32.32, | (-0.25, | <0.001 | (229.62, | (230.17, | (-0.19, | <0.001 | (332.24, | (136.24, | (-4.04, | <0.001 | (3.48,  | (1.72,  | (-4.12, | <0.001 |
|                   | 45.43)  | 37.86)  | -0.15)  |        | 266.98)  | 243.78)  | -0.13)  |        | 379.35)  | 147.87)  | -1.96)  |        | 10.62)  | 3.48)   | -2.00)  |        |
|                   | 17.60   | 16.28   | -0.27   |        | 102.53   | 105.05   | 0.11    |        | 538.53   | 57.57    | -7.44   |        | 9.11    | 1.00    | -7.36   |        |
| Republic of Korea | (17.03, | (15.71, | (-0.29, | <0.001 | (101.13, | (103.62, | (0.02,  | 0.013  | (535.36, | (56.51,  | (-8.10, | <0.001 | (8.70,  | (0.86,  | (-8.05, | <0.001 |
|                   | 18.19)  | 16.87)  | -0.25)  |        | 103.94)  | 106.49)  | 0.20)   |        | 541.71)  | 58.65)   | -6.77)  |        | 9.54)   | 1.15)   | -6.67)  |        |

|                                     |         |         |         |        |          |          |         |        |          |          |         |        |         |        |         |        |
|-------------------------------------|---------|---------|---------|--------|----------|----------|---------|--------|----------|----------|---------|--------|---------|--------|---------|--------|
| Republic of<br>Moldova              | 33.62   | 35.02   | 0.13    |        | 185.26   | 193.33   | 0.14    |        | 377.04   | 311.35   | -0.61   |        | 6.71    | 5.57   | -0.62   |        |
|                                     | (31.03, | (32.05, | (0.08,  | <0.001 | (179.21, | (186.52, | (0.11,  | <0.001 | (368.31, | (302.65, | (-1.74, | 0.297  | (5.59,  | (4.47, | (-1.94, | 0.364  |
|                                     | 36.39)  | 38.23)  | 0.19)   |        | 191.48)  | 200.38)  | 0.18)   |        | 385.94)  | 320.29)  | 0.54)   |        | 8.00)   | 6.93)  | 0.72)   |        |
| Romania                             | 20.54   | 20.59   | 0.01    |        | 177.53   | 174.99   | -0.03   |        | 485.44   | 258.36   | -2.22   |        | 8.70    | 4.57   | -2.20   |        |
|                                     | (19.60, | (19.46, | (-0.03, | 0.805  | (174.77, | (171.76, | (-0.14, | 0.592  | (480.88, | (254.43, | (-3.06, | <0.001 | (8.10,  | (4.07, | (-3.17, | <0.001 |
|                                     | 21.52)  | 21.77)  | 0.04)   |        | 180.32)  | 178.26)  | 0.08)   |        | 490.04)  | 262.35)  | -1.37)  |        | 9.34)   | 5.13)  | -1.22)  |        |
| Russian Federation                  | 36.39   | 36.40   | 0.00    |        | 178.43   | 188.74   | 0.19    |        | 620.74   | 479.37   | -0.94   |        | 11.28   | 8.62   | -0.97   |        |
|                                     | (35.92, | (35.89, | (-0.04, | 0.867  | (177.40, | (187.62, | (0.14,  | <0.001 | (618.83, | (477.59, | (-2.35, | 0.199  | (11.03, | (8.38, | (-2.39, | 0.182  |
|                                     | 36.86)  | 36.92)  | 0.05)   |        | 179.46)  | 189.85)  | 0.24)   |        | 622.65)  | 481.16)  | 0.50)   |        | 11.54)  | 8.86)  | 0.46)   |        |
| Rwanda                              | 23.24   | 22.83   | -0.06   |        | 120.16   | 117.59   | -0.08   |        | 251.39   | 158.39   | -1.62   |        | 4.36    | 2.72   | -1.65   |        |
|                                     | (21.35, | (21.52, | (-0.09, | <0.001 | (115.72, | (114.55, | (-0.11, | <0.001 | (245.09, | (154.93, | (-1.81, | <0.001 | (3.56,  | (2.28, | (-1.85, | <0.001 |
|                                     | 25.25)  | 24.20)  | -0.04)  |        | 124.74)  | 120.70)  | -0.04)  |        | 257.82)  | 161.92)  | -1.43)  |        | 5.30)   | 3.22)  | -1.46)  |        |
| Saint Kitts and<br>Nevis            | 60.91   | 62.10   | 0.07    |        | 300.74   | 308.31   | 0.09    |        | 522.74   | 107.34   | -5.12   |        | 9.43    | 1.82   | -5.32   |        |
|                                     | (29.13, | (34.47, | (0.03,  | 0.001  | (221.01, | (242.44, | (0.08,  | <0.001 | (415.26, | (69.88,  | (-6.50, | <0.001 | (0.63,  | (0.00, | (-6.91, | <0.001 |
|                                     | 113.66) | 104.15) | 0.11)   |        | 400.62)  | 387.59)  | 0.09)   |        | 650.19)  | 158.79)  | -3.72)  |        | 42.38)  | 21.48) | -3.71)  |        |
| Saint Lucia                         | 63.90   | 64.55   | 0.04    |        | 329.04   | 329.10   | -0.00   |        | 251.25   | 106.42   | -2.90   |        | 4.47    | 1.83   | -3.02   |        |
|                                     | (43.41, | (47.02, | (-0.01, | 0.082  | (278.04, | (288.05, | (-0.01, | 0.590  | (206.84, | (83.65,  | (-3.44, | <0.001 | (0.53,  | (0.09, | (-3.63, | <0.001 |
|                                     | 91.38)  | 86.71)  | 0.09)   |        | 387.05)  | 374.59)  | 0.01)   |        | 302.74)  | 133.74)  | -2.36)  |        | 16.97)  | 9.18)  | -2.41)  |        |
| Saint Vincent and<br>the Grenadines | 61.99   | 62.24   | 0.02    |        | 304.52   | 304.81   | 0.01    |        | 443.22   | 221.04   | -2.29   |        | 7.87    | 3.87   | -2.33   |        |
|                                     | (39.90, | (40.68, | (-0.00, | 0.119  | (250.36, | (254.38, | (-0.01, | 0.590  | (377.78, | (178.44, | (-3.51, | <0.001 | (1.53,  | (0.33, | (-3.62, | <0.001 |
|                                     | 92.89)  | 91.30)  | 0.04)   |        | 367.46)  | 362.45)  | 0.02)   |        | 517.30)  | 270.89)  | -1.06)  |        | 24.59)  | 16.03) | -1.03)  |        |
| Samoa                               | 26.94   | 26.49   | -0.06   |        | 221.37   | 221.37   | 0.00    |        | 653.64   | 822.20   | 0.80    |        | 11.75   | 14.69  | 0.78    |        |
|                                     | (14.78, | (15.99, | (-0.07, | <0.001 | (181.70, | (187.81, | (-0.01, | 0.650  | (583.93, | (756.51, | (0.73,  | <0.001 | (4.16,  | (7.12, | (0.71,  | <0.001 |
|                                     | 45.70)  | 41.52)  | -0.05)  |        | 267.43)  | 259.32)  | 0.02)   |        | 729.65)  | 892.20)  | 0.87)   |        | 26.54)  | 27.00) | 0.85)   |        |
| San Marino                          | 30.71   | 26.47   | -0.51   |        | 174.20   | 169.36   | -0.09   |        | 75.11    | 74.33    | -0.01   |        | 1.30    | 1.31   | 0.05    |        |
|                                     | (5.71,  | (5.04,  | (-0.54, | <0.001 | (97.89,  | (100.97, | (-0.15, | 0.001  | (29.01,  | (32.33,  | (-0.19, | 0.888  | (0.00,  | (0.00, | (-0.14, | 0.609  |
|                                     | 95.35)  | 82.84)  | -0.47)  |        | 287.08)  | 268.67)  | -0.04)  |        | 159.25)  | 148.48)  | 0.16)   |        | 46.43)  | 41.74) | 0.25)   |        |
| Sao Tome and<br>Principe            | 25.74   | 28.23   | 0.32    |        | 154.69   | 171.48   | 0.37    |        | 176.53   | 197.86   | 0.53    |        | 3.16    | 3.44   | 0.57    |        |
|                                     | (11.56, | (17.81, | (0.30,  | <0.001 | (113.96, | (143.60, | (0.31,  | <0.001 | (132.55, | (168.21, | (0.01,  | 0.046  | (0.07,  | (0.63, | (-0.08, | 0.084  |
|                                     | 50.79)  | 42.64)  | 0.34)   |        | 205.88)  | 203.25)  | 0.42)   |        | 231.00)  | 231.34)  | 1.05)   |        | 19.37)  | 10.71) | 1.22)   |        |
| Saudi Arabia                        | 35.63   | 38.40   | 0.25    |        | 228.69   | 261.22   | 0.47    |        | 445.83   | 452.81   | 0.04    |        | 7.86    | 8.01   | 0.05    |        |
|                                     | (34.13, | (37.57, | (0.21,  | <0.001 | (224.82, | (259.08, | (0.35,  | <0.001 | (440.47, | (449.94, | (-0.36, | 0.851  | (7.16,  | (7.64, | (-0.36, | 0.816  |
|                                     | 37.17)  | 39.26)  | 0.29)   |        | 232.61)  | 263.39)  | 0.59)   |        | 451.23)  | 455.69)  | 0.44)   |        | 8.62)   | 8.41)  | 0.45)   |        |



|                 |         |         |         |        |          |          |         |        |           |           |         |        |         |         |         |        |
|-----------------|---------|---------|---------|--------|----------|----------|---------|--------|-----------|-----------|---------|--------|---------|---------|---------|--------|
|                 | 28.32   | 29.12   | 0.09    |        | 169.83   | 171.44   | 0.05    |        | 204.41    | 188.04    | -0.28   |        | 3.58    | 3.26    | -0.31   |        |
| Senegal         | (26.19, | (27.69, | (0.06,  | <0.001 | (164.37, | (167.84, | (0.00,  | 0.030  | (198.51,  | (184.34,  | (-0.47, | 0.006  | (2.83,  | (2.79,  | (-0.51, | 0.003  |
|                 | 30.59)  | 30.60)  | 0.12)   |        | 175.44)  | 175.10)  | 0.09)   |        | 210.46)   | 191.80)   | -0.09)  |        | 4.47)   | 3.80)   | -0.12)  |        |
|                 | 32.30   | 33.88   | 0.15    |        | 222.88   | 234.86   | 0.17    |        | 419.58    | 162.32    | -3.18   |        | 7.50    | 2.86    | -3.23   |        |
| Serbia          | (30.46, | (31.82, | (0.10,  | <0.001 | (218.08, | (229.51, | (0.11,  | <0.001 | (412.99,  | (157.90,  | (-3.71, | <0.001 | (6.64,  | (2.30,  | (-3.79, | <0.001 |
|                 | 34.22)  | 36.03)  | 0.21)   |        | 227.75)  | 240.30)  | 0.23)   |        | 426.26)   | 166.85)   | -2.64)  |        | 8.44)   | 3.52)   | -2.66)  |        |
|                 | 24.58   | 23.72   | -0.12   |        | 179.04   | 170.85   | -0.14   |        | 499.34    | 338.84    | -1.20   |        | 8.94    | 5.95    | -1.26   |        |
| Seychelles      | (9.73,  | (11.30, | (-0.14, | <0.001 | (131.75, | (133.90, | (-0.21, | <0.001 | (417.72,  | (285.46,  | (-2.19, | 0.018  | (1.35,  | (1.00,  | (-2.27, | 0.015  |
|                 | 52.61)  | 45.13)  | -0.11)  |        | 238.58)  | 215.87)  | -0.07)  |        | 592.96)   | 400.23)   | -0.21)  |        | 31.03)  | 20.92)  | -0.25)  |        |
|                 | 30.02   | 31.06   | 0.12    |        | 172.27   | 175.35   | 0.08    |        | 214.85    | 257.47    | 0.65    |        | 3.77    | 4.50    | 0.64    |        |
| Sierra Leone    | (27.05, | (29.11, | (0.10,  | <0.001 | (164.86, | (170.53, | (-0.04, | 0.187  | (206.65,  | (251.72,  | (0.39,  | <0.001 | (2.75,  | (3.77,  | (0.38,  | <0.001 |
|                 | 33.24)  | 33.10)  | 0.14)   |        | 179.92)  | 180.28)  | 0.20)   |        | 223.30)   | 263.32)   | 0.90)   |        | 5.06)   | 5.35)   | 0.89)   |        |
|                 | 31.73   | 25.14   | -0.79   |        | 178.22   | 140.23   | -0.83   |        | 187.36    | 76.67     | -2.99   |        | 3.36    | 1.36    | -3.03   |        |
| Singapore       | (28.99, | (23.12, | (-0.86, | <0.001 | (171.63, | (135.75, | (-0.84, | <0.001 | (180.59,  | (73.42,   | (-4.02, | <0.001 | (2.50,  | (0.96,  | (-4.09, | <0.001 |
|                 | 34.67)  | 27.32)  | -0.72)  |        | 185.02)  | 144.88)  | -0.81)  |        | 194.32)   | 80.08)    | -1.94)  |        | 4.42)   | 1.95)   | -1.95)  |        |
|                 | 26.42   | 20.51   | -0.87   |        | 212.52   | 166.55   | -0.84   |        | 437.10    | 140.40    | -3.96   |        | 7.90    | 2.48    | -4.06   |        |
| Slovakia        | (24.29, | (18.57, | (-0.91, | <0.001 | (206.49, | (161.11, | (-0.86, | <0.001 | (428.50,  | (135.44,  | (-4.67, | <0.001 | (6.78,  | (1.87,  | (-5.07, | <0.001 |
|                 | 28.71)  | 22.64)  | -0.84)  |        | 218.69)  | 172.16)  | -0.82)  |        | 445.85)   | 145.53)   | -3.25)  |        | 9.16)   | 3.29)   | -3.04)  |        |
|                 | 26.50   | 22.36   | -0.58   |        | 216.57   | 179.36   | -0.66   |        | 181.61    | 50.53     | -4.50   |        | 3.23    | 0.85    | -4.69   |        |
| Slovenia        | (23.08, | (18.89, | (-0.62, | <0.001 | (206.73, | (169.67, | (-0.70, | <0.001 | (172.68,  | (45.55,   | (-5.01, | <0.001 | (2.14,  | (0.32,  | (-5.28, | <0.001 |
|                 | 30.32)  | 26.37)  | -0.54)  |        | 226.80)  | 189.57)  | -0.62)  |        | 190.92)   | 56.03)    | -4.00)  |        | 4.73)   | 2.02)   | -4.10)  |        |
|                 | 26.74   | 26.42   | -0.04   |        | 177.34   | 177.99   | 0.02    |        | 2525.73   | 2733.27   | 0.28    |        | 45.46   | 49.03   | 0.27    |        |
| Solomon Islands | (17.66, | (20.32, | (-0.06, | <0.001 | (151.67, | (161.33, | (-0.02, | 0.425  | (2426.80, | (2667.05, | (0.14,  | <0.001 | (32.99, | (40.49, | (0.14,  | <0.001 |
|                 | 39.10)  | 33.80)  | -0.03)  |        | 206.25)  | 195.92)  | 0.05)   |        | '         | '         | 0.42)   |        | 61.26)  | 58.85)  | 0.40)   |        |
|                 | 26.98   | 29.29   | 0.28    |        | 141.80   | 155.22   | 0.33    |        | 262.62    | 339.40    | 0.94    |        | 4.62    | 5.92    | 0.91    |        |
| Somalia         | (24.88, | (27.99, | (0.27,  | <0.001 | (136.95, | (152.14, | (0.28,  | <0.001 | (256.07,  | (334.95,  | (0.77,  | <0.001 | (3.78,  | (5.34,  | (0.68,  | <0.001 |
|                 | 29.21)  | 30.63)  | 0.29)   |        | 146.78)  | 158.36)  | 0.38)   |        | 269.30)   | 343.91)   | 1.11)   |        | 5.58)   | 6.55)   | 1.15)   |        |
|                 | 37.28   | 34.67   | -0.25   |        | 165.22   | 155.86   | -0.19   |        | 358.00    | 179.73    | -2.28   |        | 6.44    | 3.18    | -2.35   |        |
| South Africa    | (36.29, | (33.94, | (-0.27, | <0.001 | (163.07, | (154.32, | (-0.22, | <0.001 | (354.82,  | (178.08,  | (-3.81, | 0.004  | (6.02,  | (2.97,  | (-3.88, | 0.003  |
|                 | 38.30)  | 35.41)  | -0.22)  |        | 167.40)  | 157.42)  | -0.16)  |        | 361.20)   | 181.40)   | -0.73)  |        | 6.88)   | 3.41)   | -0.79)  |        |
|                 | 24.45   | 26.25   | 0.24    |        | 144.42   | 155.49   | 0.25    |        | 147.79    | 165.89    | 0.41    |        | 2.55    | 2.84    | 0.37    |        |
| South Sudan     | (22.27, | (24.38, | (0.22,  | <0.001 | (138.81, | (150.84, | (0.21,  | <0.001 | (142.25,  | (161.21,  | (-0.04, | 0.074  | (1.87,  | (2.25,  | (-0.08, | 0.105  |

|                            |         |         |         |        |          |          |         |        |           |           |         |        |         |         |         |        |
|----------------------------|---------|---------|---------|--------|----------|----------|---------|--------|-----------|-----------|---------|--------|---------|---------|---------|--------|
|                            | 26.80)  | 28.22)  | 0.27)   |        | 150.20)  | 160.26)  | 0.28)   |        | 153.49)   | 170.67)   | 0.85)   |        | 3.42)   | 3.54)   | 0.82)   |        |
|                            | 33.18)  | 30.36)  | -0.30)  |        | 168.23)  | 176.28)  | 0.17)   |        | 251.37)   | 83.90)    | -3.77)  |        | 4.39)   | 1.46)   | -3.78)  |        |
| Spain                      | (32.25, | (29.44, | (-0.32, | <0.001 | (166.11, | (174.17, | (0.08,  | <0.001 | (248.78,  | (82.43,   | (-4.40, | <0.001 | (4.05,  | (1.28,  | (-4.41, | <0.001 |
|                            | 34.13)  | 31.30)  | -0.28)  |        | 170.38)  | 178.42)  | 0.26)   |        | 253.97)   | 85.38)    | -3.13)  |        | 4.75)   | 1.67)   | -3.13)  |        |
|                            | 24.31)  | 22.89)  | -0.21)  |        | 175.00)  | 165.75)  | -0.18)  |        | 580.06)   | 291.61)   | -2.25)  |        | 10.15)  | 5.05)   | -2.28)  |        |
| Sri Lanka                  | (23.18, | (21.87, | (-0.23, | <0.001 | (171.91, | (163.00, | (-0.21, | <0.001 | (574.46,  | (287.94,  | (-3.99, | 0.013  | (9.42,  | (4.58,  | (-4.01, | 0.011  |
|                            | 25.49)  | 23.95)  | -0.19)  |        | 178.13)  | 168.52)  | -0.16)  |        | 585.70)   | 295.31)   | -0.47)  |        | 10.92)  | 5.56)   | -0.52)  |        |
|                            | 36.32)  | 38.36)  | 0.19)   |        | 220.91)  | 246.56)  | 0.40)   |        | 1249.59)  | 767.15)   | -1.67)  |        | 22.07)  | 13.39)  | -1.71)  |        |
| Sudan                      | (34.87, | (37.39, | (0.17,  | <0.001 | (217.21, | (244.04, | (0.26,  | <0.001 | (1240.94) | (762.78,  | (-1.77, | <0.001 | (20.93, | (12.81, | (-1.81, | <0.001 |
|                            | 37.83)  | 39.36)  | 0.21)   |        | 224.65)  | 249.11)  | 0.55)   |        | ,         | 771.54)   | -1.57)  |        | 23.27)  | 13.98)  | -1.62)  |        |
|                            | 61.78)  | 68.66)  | 0.38)   |        | 300.29)  | 340.59)  | 0.44)   |        | 504.98)   | 294.03)   | -1.81)  |        | 9.01)   | 5.20)   | -1.83)  |        |
| Suriname                   | (49.54, | (58.03, | (0.34,  | <0.001 | (271.27, | (316.44, | (0.38,  | <0.001 | (467.24,  | (271.62,  | (-3.09, | 0.007  | (4.60,  | (2.62,  | (-3.57, | 0.042  |
|                            | 76.35)  | 80.70)  | 0.41)   |        | 331.68)  | 366.12)  | 0.49)   |        | 545.09)   | 317.82)   | -0.50)  |        | 16.05)  | 9.28)   | -0.07)  |        |
|                            | 32.23)  | 37.21)  | 0.50)   |        | 189.60)  | 209.74)  | 0.35)   |        | 134.29)   | 40.72)    | -4.01)  |        | 2.36)   | 0.68)   | -4.10)  |        |
| Sweden                     | (30.25, | (35.18, | (0.43,  | <0.001 | (184.79, | (204.97, | (0.31,  | <0.001 | (130.25,  | (38.63,   | (-4.33, | <0.001 | (1.85,  | (0.43,  | (-4.41, | <0.001 |
|                            | 34.32)  | 39.33)  | 0.56)   |        | 194.51)  | 214.60)  | 0.39)   |        | 138.44)   | 42.91)    | -3.69)  |        | 2.97)   | 1.03)   | -3.79)  |        |
|                            | 28.69)  | 25.09)  | -0.45)  |        | 155.09)  | 151.07)  | -0.09)  |        | 181.38)   | 43.50)    | -4.88)  |        | 3.19)   | 0.75)   | -4.95)  |        |
| Switzerland                | (26.75, | (23.33, | (-0.47, | <0.001 | (150.55, | (146.84, | (-0.13, | <0.001 | (176.44,  | (41.24,   | (-5.88, | <0.001 | (2.56,  | (0.48,  | (-6.00, | <0.001 |
|                            | 30.76)  | 26.97)  | -0.44)  |        | 159.75)  | 155.41)  | -0.05)  |        | 186.44)   | 45.87)    | -3.87)  |        | 3.94)   | 1.14)   | -3.89)  |        |
|                            | 34.77)  | 35.27)  | 0.05)   |        | 228.16)  | 242.33)  | 0.23)   |        | 1929.75)  | 1080.27)  | -2.04)  |        | 33.09)  | 18.46)  | -2.06)  |        |
| Syrian Arab Republic       | (32.91, | (33.53, | (0.03,  | <0.001 | (223.24, | (237.78, | (0.13,  | <0.001 | (1916.16) | (1070.75) | (-2.32, | <0.001 | (31.31, | (17.23, | (-2.34, | <0.001 |
|                            | 36.70)  | 37.08)  | 0.07)   |        | 233.16)  | 246.95)  | 0.33)   |        | ,         | ,         | -1.76)  |        | 34.95)  | 19.77)  | -1.78)  |        |
|                            | 19.72)  | 18.87)  | -0.15)  |        | 232.16)  | 243.74)  | 0.17)   |        | 1943.41)  | 1089.86)  | -1.76)  |        | 34.95)  | 19.77)  | -1.78)  |        |
| Taiwan (Province of China) | (18.83, | (17.97, | (-0.18, | <0.001 | (229.11, | (240.53, | (0.04,  | 0.013  | 149.68)   | 118.42)   | -0.90)  |        | 2.47)   | 1.96)   | -0.83)  |        |
|                            | 20.63)  | 19.81)  | -0.13)  |        | 235.25)  | 246.98)  | 0.31)   |        | (147.22,  | (116.20,  | (-1.54, | 0.006  | (2.17,  | (1.68,  | (-1.49, | 0.013  |
|                            | 36.60)  | 35.72)  | -0.09)  |        | 208.41)  | 202.87)  | -0.10)  |        | 152.18)   | 120.67)   | -0.27)  |        | 2.82)   | 2.27)   | -0.18)  |        |
| Tajikistan                 | (33.86, | (33.87, | (-0.13, | <0.001 | (201.57, | (198.35, | (-0.13, | <0.001 | 478.93)   | 475.33)   | 0.06)   |        | 8.62)   | 8.55)   | 0.08)   |        |
|                            | 39.52)  | 37.65)  | -0.05)  |        | 215.44)  | 207.48)  | -0.06)  |        | (468.50,  | (468.40,  | (-0.52, | 0.841  | (7.26,  | (7.64,  | (-0.48, | 0.791  |
|                            | 21.02)  | 20.45)  | -0.09)  |        | 135.19)  | 133.40)  | -0.03)  |        | 489.54)   | 482.34)   | 0.64)   |        | 10.17)  | 9.54)   | 0.63)   |        |
| Thailand                   | (20.44, | (19.91, | (-0.13, | <0.001 | (133.71, | (132.02, | (-0.13, | 0.536  | 282.81)   | 269.81)   | -0.04)  |        | 4.96)   | 4.70)   | -0.07)  |        |
|                            | 21.60)  | 21.01)  | -0.06)  |        | 136.68)  | 134.78)  | 0.07)   |        | (280.69,  | (267.83,  | (-0.92, | 0.927  | (4.68,  | (4.44,  | (-0.93, | 0.876  |
|                            |         |         |         |        |          |          |         |        | 284.95)   | 271.81)   | 0.84)   |        | 5.25)   | 4.97)   | 0.80)   |        |

|                     |         |         |         |        |          |          |         |        |          |          |         |        |         |         |         |        |
|---------------------|---------|---------|---------|--------|----------|----------|---------|--------|----------|----------|---------|--------|---------|---------|---------|--------|
|                     | 22.92   | 22.60   | -0.05   |        | 149.90   | 148.96   | -0.00   |        | 250.17   | 373.00   | 1.41    |        | 4.38    | 6.45    | 1.36    |        |
| Timor-Leste         | (17.74, | (18.28, | (-0.06, | <0.001 | (135.85, | (137.16, | (-0.12, | 0.991  | (232.12, | (354.90, | (0.82,  | <0.001 | (2.28,  | (4.24,  | (0.79,  | <0.001 |
|                     | 29.22)  | 27.69)  | -0.04)  |        | 165.07)  | 161.53)  | 0.12)   |        | 269.30)  | 391.84)  | 2.00)   |        | 7.67)   | 9.46)   | 1.94)   |        |
|                     | 27.25   | 29.09   | 0.22    |        | 148.85   | 158.10   | 0.23    |        | 238.40   | 254.77   | 0.27    |        | 4.19    | 4.47    | 0.26    |        |
| Togo                | (24.32, | (27.17, | (0.19,  | <0.001 | (141.64, | (153.52, | (0.18,  | <0.001 | (229.39, | (249.00, | (-0.08, | 0.127  | (3.06,  | (3.73,  | (-0.08, | 0.135  |
|                     | 30.46)  | 31.10)  | 0.26)   |        | 156.35)  | 162.79)  | 0.29)   |        | 247.69)  | 260.64)  | 0.61)   |        | 5.61)   | 5.32)   | 0.60)   |        |
|                     | 25.31   | 26.04   | 0.10    |        | 203.43   | 218.94   | 0.26    |        | 657.01   | 759.49   | 0.52    |        | 11.78   | 13.57   | 0.50    |        |
| Tokelau             | (0.00,  | (0.00,  | (0.07,  | <0.001 | (6.00,   | (5.06,   | (0.21,  | <0.001 | (152.74, | (178.51, | (0.42,  | <0.001 | (0.00,  | (0.00,  | (0.39,  | <0.001 |
|                     | 867.77) | 937.88) | 0.13)   |        | 1177.63) | 1287.37) | 0.31)   |        | 1877.96) | 2128.13) | 0.61)   |        | 843.23) | 914.13) | 0.62)   |        |
|                     | 26.31   | 26.46   | 0.02    |        | 231.28   | 238.43   | 0.10    |        | 389.27   | 445.26   | 0.45    |        | 6.96    | 7.88    | 0.43    |        |
| Tonga               | (11.01, | (12.19, | (-0.01, | 0.243  | (177.24, | (189.10, | (0.06,  | <0.001 | (317.58, | (376.93, | (0.30,  | <0.001 | (0.72,  | (1.41,  | (0.30,  | <0.001 |
|                     | 54.22)  | 50.30)  | 0.04)   |        | 297.22)  | 296.82)  | 0.14)   |        | 472.82)  | 522.54)  | 0.61)   |        | 27.55)  | 24.74)  | 0.56)   |        |
|                     | 73.75   | 72.62   | -0.05   |        | 390.05   | 382.68   | -0.05   |        | 436.35   | 247.87   | -1.95   |        | 7.80    | 4.38    | -1.99   |        |
| Trinidad and Tobago | (66.34, | (65.64, | (-0.06, | <0.001 | (372.46, | (367.03, | (-0.11, | 0.066  | (417.70, | (235.31, | (-2.75, | <0.001 | (5.48,  | (2.86,  | (-2.82, | <0.001 |
|                     | 81.80)  | 80.20)  | -0.04)  |        | 408.27)  | 398.90)  | 0.00)   |        | 455.63)  | 261.02)  | -1.13)  |        | 10.79)  | 6.53)   | -1.14)  |        |
|                     | 33.06   | 33.22   | 0.02    |        | 213.66   | 223.91   | 0.17    |        | 510.83   | 377.28   | -1.03   |        | 8.95    | 6.57    | -1.05   |        |
| Tunisia             | (31.03, | (31.61, | (0.00,  | 0.038  | (208.33, | (219.78, | (0.13,  | <0.001 | (502.72, | (371.81, | (-1.16, | <0.001 | (7.90,  | (5.87,  | (-1.19, | <0.001 |
|                     | 35.19)  | 34.89)  | 0.03)   |        | 219.09)  | 228.11)  | 0.21)   |        | 519.04)  | 382.81)  | -0.91)  |        | 10.11)  | 7.34)   | -0.92)  |        |
|                     | 24.36   | 19.88   | -0.71   |        | 223.62   | 180.06   | -0.71   |        | 538.19   | 179.27   | -3.69   |        | 9.62    | 3.11    | -3.76   |        |
| Turkey              | (23.72, | (19.42, | (-0.74, | <0.001 | (221.63, | (178.68, | (-0.79, | <0.001 | (535.10, | (177.88, | (-4.05, | <0.001 | (9.21,  | (2.93,  | (-4.17, | <0.001 |
|                     | 25.02)  | 20.35)  | -0.68)  |        | 225.63)  | 181.44)  | -0.63)  |        | 541.30)  | 180.66)  | -3.32)  |        | 10.05)  | 3.30)   | -3.36)  |        |
|                     | 36.21   | 36.96   | 0.08    |        | 201.24   | 210.61   | 0.16    |        | 759.25   | 697.31   | -0.15   |        | 13.66   | 12.39   | -0.20   |        |
| Turkmenistan        | (33.11, | (34.40, | (0.06,  | <0.001 | (193.62, | (204.40, | (0.14,  | <0.001 | (744.38, | (685.96, | (-1.26, | 0.791  | (11.71, | (10.92, | (-1.30, | 0.722  |
|                     | 39.55)  | 39.68)  | 0.10)   |        | 209.10)  | 216.96)  | 0.18)   |        | 774.37)  | 708.82)  | 0.97)   |        | 15.84)  | 14.02)  | 0.91)   |        |
|                     | 25.52   | 26.81   | 0.17    |        | 189.12   | 205.45   | 0.29    |        | 987.59   | 1302.18  | 0.95    |        | 17.81   | 23.44   | 0.94    |        |
| Tuvalu              | (0.46,  | (1.14,  | (0.16,  | <0.001 | (73.49,  | (93.57,  | (0.27,  | <0.001 | (685.81, | (985.67, | (0.86,  | <0.001 | (0.06,  | (0.62,  | (0.82,  | <0.001 |
|                     | 156.07) | 137.54) | 0.18)   |        | 399.23)  | 393.24)  | 0.31)   |        | 1378.01) | 1689.75) | 1.04)   |        | 142.76) | 132.63) | 1.06)   |        |
|                     | 23.79   | 23.80   | -0.00   |        | 117.59   | 118.21   | 0.02    |        | 131.78   | 202.42   | 1.46    |        | 2.27    | 3.48    | 1.44    |        |
| Uganda              | (22.47, | (22.97, | (-0.01, | 0.788  | (114.50, | (116.27, | (0.01,  | <0.001 | (128.61, | (199.99, | (1.12,  | <0.001 | (1.87,  | (3.16,  | (1.10,  | <0.001 |
|                     | 25.17)  | 24.66)  | 0.01)   |        | 120.74)  | 120.17)  | 0.03)   |        | 135.02)  | 204.88)  | 1.81)   |        | 2.74)   | 3.82)   | 1.78)   |        |
|                     | 35.89   | 36.55   | 0.06    |        | 195.50   | 195.67   | 0.01    |        | 445.13   | 892.33   | 2.43    |        | 7.99    | 15.89   | 2.40    |        |
| Ukraine             | (35.07, | (35.63, | (0.02,  | 0.001  | (193.60, | (193.61, | (-0.03, | 0.704  | (442.25, | (887.84, | (0.74,  | 0.005  | (7.61,  | (15.30, | (0.67,  | 0.007  |
|                     | 36.73)  | 37.49)  | 0.09)   |        | 197.42)  | 197.76)  | 0.05)   |        | 448.02)  | 896.84)  | 4.15)   |        | 8.38)   | 16.50)  | 4.16)   |        |

|                                    |         |         |         |        |          |          |         |        |          |               |         |        |         |         |         |        |
|------------------------------------|---------|---------|---------|--------|----------|----------|---------|--------|----------|---------------|---------|--------|---------|---------|---------|--------|
| United Arab Emirates               | 37.99   | 39.01   | 0.09    |        | 255.00   | 269.49   | 0.20    |        | 437.45   | 332.87        | -1.00   |        | 7.54    | 5.76    | -0.97   |        |
|                                    | (34.41, | (37.10, | (0.05,  | <0.001 | (245.79, | (265.03, | (0.15,  | <0.001 | (424.57, | (327.20,      | (-1.31, | <0.001 | (5.95,  | (5.06,  | (-1.29, | <0.001 |
|                                    | 41.95)  | 41.04)  | 0.13)   |        | 264.57)  | 274.05)  | 0.24)   |        | 450.71)  | 338.65)       | -0.69)  |        | 9.53)   | 6.58)   | -0.65)  |        |
| United Kingdom                     | 31.69   | 27.58   | -0.48   |        | 182.78   | 166.35   | -0.32   |        | 207.26   | 110.72        | -2.14   |        | 3.74    | 1.98    | -2.17   |        |
|                                    | (30.95, | (26.91, | (-0.50, | <0.001 | (180.97, | (164.73, | (-0.34, | <0.001 | (205.33, | (109.41,      | (-2.53, | <0.001 | (3.48,  | (1.80,  | (-2.57, | <0.001 |
|                                    | 32.46)  | 28.26)  | -0.45)  |        | 184.60)  | 167.98)  | -0.31)  |        | 209.20)  | 112.04)       | -1.75)  |        | 4.01)   | 2.16)   | -1.76)  |        |
| United Republic of Tanzania        | 24.62   | 28.05   | 0.45    |        | 123.22   | 143.72   | 0.54    |        | 182.60   | 191.51        | 0.24    |        | 3.11    | 3.27    | 0.20    |        |
|                                    | (23.54, | (27.30, | (0.43,  | <0.001 | (120.70, | (141.99, | (0.46,  | <0.001 | (179.67, | (189.57,      | (-0.04, | 0.098  | (2.74,  | (3.02,  | (0.00,  | 0.048  |
|                                    | 25.73)  | 28.81)  | 0.47)   |        | 125.77)  | 145.47)  | 0.62)   |        | 185.56)  | 193.46)       | 0.52)   |        | 3.53)   | 3.53)   | 0.39)   |        |
| United States of America           | 37.35   | 35.86   | -0.14   |        | 171.82   | 188.07   | 0.31    |        | 222.85   | 167.36        | -0.94   |        | 3.98    | 2.95    | -0.99   |        |
|                                    | (36.99, | (35.52, | (-0.19, | <0.001 | (171.05, | (187.29, | (0.18,  | <0.001 | (221.97, | (166.62,      | (-1.32, | <0.001 | (3.86,  | (2.85,  | (-1.36, | <0.001 |
|                                    | 37.71)  | 36.21)  | -0.09)  |        | 172.59)  | 188.86)  | 0.45)   |        | 223.73)  | 168.11)       | -0.56)  |        | 4.10)   | 3.05)   | -0.62)  |        |
| United States Virgin Islands       | 57.14   | 58.29   | 0.08    |        | 285.95   | 292.57   | 0.07    |        | 415.03   | 191.42        | -2.56   |        | 7.32    | 3.38    | -2.56   |        |
|                                    | (35.90, | (34.60, | (0.04,  | <0.001 | (235.76, | (236.65, | (0.06,  | <0.001 | (354.02, | (146.78,      | (-3.29, | <0.001 | (1.46,  | (0.11,  | (-3.44, | <0.001 |
|                                    | 86.66)  | 92.57)  | 0.11)   |        | 343.98)  | 358.34)  | 0.09)   |        | 483.83)  | 245.99)       | -1.83)  |        | 22.32)  | 19.06)  | -1.68)  |        |
| Uruguay                            | 20.49   | 18.71   | -0.31   |        | 119.28   | 113.39   | -0.16   |        | 219.25   | 83.60         | -2.99   |        | 3.93    | 1.47    | -3.06   |        |
|                                    | (17.93, | (16.37, | (-0.33, | <0.001 | (112.96, | (107.54, | (-0.24, | <0.001 | (210.66, | (78.59,       | (-3.50, | <0.001 | (2.85,  | (0.87,  | (-3.57, | <0.001 |
|                                    | 23.32)  | 21.30)  | -0.30)  |        | 125.85)  | 119.49)  | -0.09)  |        | 228.10)  | 88.85)        | -2.48)  |        | 5.27)   | 2.32)   | -2.53)  |        |
| Uzbekistan                         | 32.64   | 33.63   | 0.11    |        | 181.96   | 193.92   | 0.22    |        | 540.51   | 903.03        | 1.88    |        | 9.70    | 15.89   | 1.82    |        |
|                                    | (31.38, | (32.68, | (0.09,  | <0.001 | (178.90, | (191.63, | (0.20,  | <0.001 | (535.24, | (898.11,      | (1.34,  | <0.001 | (9.00,  | (15.25, | (1.27,  | <0.001 |
|                                    | 33.94)  | 34.59)  | 0.12)   |        | 185.06)  | 196.23)  | 0.24)   |        | 545.82)  | 907.97)       | 2.43)   |        | 10.43)  | 16.56)  | 2.37)   |        |
| Vanuatu                            | 29.51   | 29.11   | -0.05   |        | 228.76   | 227.46   | -0.01   |        | 1068.90  | 1496.87       | 1.13    |        | 19.34   | 26.97   | 1.12    |        |
|                                    | (16.67, | (19.88, | (-0.06, | <0.001 | (188.85, | (199.53, | (-0.03, | 0.130  | (980.18, | (1423.94,     | (0.95,  | <0.001 | (9.11,  | (17.95, | (0.93,  | <0.001 |
|                                    | 48.69)  | 41.31)  | -0.03)  |        | 274.79)  | 258.28)  | 0.00)   |        | 1163.64) | ,<br>1572.64) | 1.32)   |        | 36.20)  | 39.00)  | 1.30)   |        |
| Venezuela (Bolivarian Republic of) | 27.61   | 24.59   | -0.40   |        | 163.80   | 151.33   | -0.27   |        | 464.90   | 318.69        | -1.11   |        | 8.20    | 5.58    | -1.16   |        |
|                                    | (26.43, | (23.67, | (-0.41, | <0.001 | (160.85, | (149.06, | (-0.30, | <0.001 | (459.96, | (315.37,      | (-2.27, | 0.063  | (7.55,  | (5.15,  | (-2.22, | 0.034  |
|                                    | 28.83)  | 25.54)  | -0.38)  |        | 166.79)  | 153.62)  | -0.24)  |        | 469.87)  | 322.03)       | 0.06)   |        | 8.89)   | 6.03)   | -0.09)  |        |
| Viet Nam                           | 22.10   | 21.56   | -0.09   |        | 156.62   | 154.98   | -0.03   |        | 248.83   | 163.15        | -1.46   |        | 4.38    | 2.82    | -1.52   |        |
|                                    | (21.52, | (21.12, | (-0.10, | <0.001 | (155.04, | (153.81, | (-0.05, | 0.012  | (246.86, | (161.93,      | (-1.60, | <0.001 | (4.12,  | (2.66,  | (-1.67, | <0.001 |
|                                    | 22.69)  | 22.00)  | -0.07)  |        | 158.20)  | 156.16)  | -0.01)  |        | 250.81)  | 164.37)       | -1.31)  |        | 4.66)   | 2.99)   | -1.36)  |        |
| Yemen                              | 36.61   | 38.04   | 0.13    |        | 221.43   | 237.94   | 0.28    |        | 909.47   | 719.53        | -0.78   |        | 16.34   | 12.78   | -0.81   |        |
|                                    | (34.76, | (36.95, | (0.10,  | <0.001 | (216.79, | (235.17, | (0.08,  | 0.006  | (900.07, | (714.74,      | (-1.06, | <0.001 | (15.10, | (12.14, | (-1.02, | <0.001 |

|                     |         |         |         |        |          |          |         |        |          |          |         |        |         |         |         |        |
|---------------------|---------|---------|---------|--------|----------|----------|---------|--------|----------|----------|---------|--------|---------|---------|---------|--------|
|                     | 38.53)  | 39.15)  | 0.15)   |        | 226.15)  | 240.72)  | 0.48)   |        | 918.95)  | 724.33)  | -0.51)  |        | 17.67)  | 13.43)  | -0.59)  |        |
|                     | 26.04   | 26.47   | 0.05    |        | 122.15   | 125.71   | 0.09    |        | 317.35   | 268.19   | -0.58   |        | 5.51    | 4.64    | -0.59   |        |
| Zambia              | (24.00, | (25.25, | (0.04,  | <0.001 | (117.49, | (122.94, | (0.03,  | 0.002  | (310.10, | (264.24, | (-0.73, | <0.001 | (4.59,  | (4.13,  | (-0.74, | <0.001 |
|                     | 28.21)  | 27.75)  | 0.07)   |        | 126.96)  | 128.54)  | 0.15)   |        | 324.73)  | 272.18)  | -0.43)  |        | 6.59)   | 5.20)   | -0.44)  |        |
|                     | 30.50   | 33.47   | 0.32    |        | 136.71   | 154.16   | 0.42    |        | 103.75   | 177.82   | 2.00    |        | 1.78    | 3.09    | 2.06    |        |
| Zimbabwe            | (28.62, | (31.97, | (0.30,  | <0.001 | (132.55, | (150.88, | (0.40,  | <0.001 | (100.22, | (174.34, | (1.44,  | <0.001 | (1.34,  | (2.64,  | (1.49,  | <0.001 |
|                     | 32.48)  | 35.02)  | 0.35)   |        | 140.97)  | 157.50)  | 0.44)   |        | 107.38)  | 181.35)  | 2.56)   |        | 2.32)   | 3.59)   | 2.63)   |        |
| <b>Women</b>        |         |         |         |        |          |          |         |        |          |          |         |        |         |         |         |        |
|                     | 34.34   | 34.76   | 0.04    |        | 194.24   | 203.66   | 0.20    |        | 1686.25  | 1053.52  | -1.57   |        | 29.89   | 18.77   | -1.55   |        |
| Afghanistan         | (31.43, | (33.22, | (0.01,  | 0.011  | (187.11, | (199.79, | (0.01,  | 0.043  | (1665.35 | (1044.83 | (-1.73, | <0.001 | (27.15, | (17.61, | (-1.71, | <0.001 |
|                     | 37.48)  | 36.35)  | 0.07)   |        | 201.61)  | 207.60)  | 0.39)   |        | '        | '        | -1.41)  |        | 32.85)  | 19.98)  | -1.39)  |        |
|                     | 15.55   | 14.31   | -0.29   |        | 123.82   | 118.03   | -0.16   |        | 232.32   | 192.81   | -0.86   |        | 3.92    | 3.25    | -0.88   |        |
| Albania             | (12.70, | (11.10, | (-0.31, | <0.001 | (115.27, | (108.33, | (-0.18, | <0.001 | (220.83, | (180.41, | (-1.21, | <0.001 | (2.55,  | (1.83,  | (-1.23, | <0.001 |
|                     | 18.88)  | 18.20)  | -0.27)  |        | 132.86)  | 128.38)  | -0.13)  |        | 244.30)  | 205.86)  | -0.51)  |        | 5.81)   | 5.39)   | -0.52)  |        |
|                     | 28.61   | 27.96   | -0.08   |        | 182.05   | 181.97   | 0.02    |        | 901.06   | 381.78   | -2.90   |        | 15.72   | 6.61    | -2.92   |        |
| Algeria             | (26.99, | (26.89, | (-0.09, | <0.001 | (177.83, | (179.26, | (-0.07, | 0.732  | (891.92, | (377.75, | (-3.14, | <0.001 | (14.52, | (6.10,  | (-3.16, | <0.001 |
|                     | 30.30)  | 29.07)  | -0.07)  |        | 186.35)  | 184.73)  | 0.10)   |        | 910.29)  | 385.84)  | -2.66)  |        | 16.99)  | 7.17)   | -2.68)  |        |
|                     | 20.02   | 20.88   | 0.15    |        | 186.97   | 199.39   | 0.22    |        | 138.65   | 241.26   | 1.99    |        | 2.37    | 4.19    | 2.04    |        |
| American Samoa      | (2.06,  | (2.34,  | (0.12,  | <0.001 | (107.03, | (117.39, | (0.21,  | <0.001 | (71.73,  | (150.12, | (1.75,  | <0.001 | (0.00,  | (0.00,  | (1.76,  | <0.001 |
|                     | 81.32)  | 81.04)  | 0.17)   |        | 305.34)  | 318.31)  | 0.23)   |        | 244.34)  | 368.95)  | 2.24)   |        | 52.26)  | 53.59)  | 2.33)   |        |
|                     | 23.10   | 23.18   | 0.03    |        | 148.16   | 166.30   | 0.40    |        | 52.52    | 29.96    | -1.87   |        | 0.89    | 0.50    | -1.91   |        |
| Andorra             | (4.46,  | (4.57,  | (0.01,  | 0.002  | (88.50,  | (106.46, | (0.36,  | <0.001 | (20.05,  | (8.57,   | (-2.15, | <0.001 | (0.00,  | (0.00,  | (-2.26, | <0.001 |
|                     | 77.77)  | 75.49)  | 0.05)   |        | 238.49)  | 253.46)  | 0.44)   |        | 118.43)  | 83.03)   | -1.59)  |        | 44.22)  | 40.36)  | -1.57)  |        |
|                     | 23.78   | 22.61   | -0.18   |        | 105.77   | 102.46   | -0.11   |        | 156.92   | 113.42   | -1.06   |        | 2.74    | 1.96    | -1.10   |        |
| Angola              | (21.54, | (21.34, | (-0.20, | <0.001 | (100.86, | (99.65,  | (-0.12, | <0.001 | (151.02, | (110.52, | (-1.46, | <0.001 | (2.01,  | (1.60,  | (-1.49, | <0.001 |
|                     | 26.20)  | 23.95)  | -0.16)  |        | 110.87)  | 105.34)  | -0.10)  |        | 162.99)  | 116.38)  | -0.66)  |        | 3.67)   | 2.39)   | -0.70)  |        |
|                     | 55.52   | 53.43   | -0.13   |        | 300.81   | 284.33   | -0.22   |        | 157.28   | 56.81    | -3.52   |        | 2.73    | 0.95    | -3.64   |        |
| Antigua and Barbuda | (22.78, | (25.29, | (-0.15, | <0.001 | (212.90, | (213.07, | (-0.32, | <0.001 | (96.05,  | (27.78,  | (-4.41, | <0.001 | (0.00,  | (0.00,  | (-4.65, | <0.001 |
|                     | 114.50) | 100.92) | -0.12)  |        | 413.60)  | 373.33)  | -0.11)  |        | 243.85)  | 104.99)  | -2.62)  |        | 36.52)  | 25.81)  | -2.62)  |        |
|                     | 12.44   | 11.55   | -0.26   |        | 74.88    | 74.03    | -0.04   |        | 213.57   | 80.29    | -3.30   |        | 3.68    | 1.38    | -3.38   |        |
| Argentina           | (11.57, | (10.86, | (-0.27, | <0.001 | (72.71,  | (72.27,  | (-0.06, | 0.002  | (209.92, | (78.44,  | (-3.73, | <0.001 | (3.21,  | (1.15,  | (-3.87, | <0.001 |
|                     | 13.37)  | 12.28)  | -0.25)  |        | 77.09)   | 75.83)   | -0.01)  |        | 217.28)  | 82.17)   | -2.86)  |        | 4.19)   | 1.64)   | -2.89)  |        |

|            |         |         |         |        |          |          |         |        |          |          |         |        |        |        |         |        |
|------------|---------|---------|---------|--------|----------|----------|---------|--------|----------|----------|---------|--------|--------|--------|---------|--------|
|            | 30.54   | 29.56   | -0.11   |        | 216.09   | 207.08   | -0.15   |        | 172.65   | 75.67    | -2.80   |        | 2.95   | 1.29   | -2.80   |        |
| Armenia    | (26.70, | (25.40, | (-0.12, | <0.001 | (205.60, | (196.17, | (-0.17, | <0.001 | (163.27, | (68.98,  | (-3.63, | <0.001 | (1.84, | (0.56, | (-3.65, | <0.001 |
|            | 34.80)  | 34.35)  | -0.10)  |        | 227.00)  | 218.58)  | -0.13)  |        | 182.46)  | 82.96)   | -1.97)  |        | 4.52)  | 2.77)  | -1.94)  |        |
|            | 22.96   | 18.71   | -0.72   |        | 141.22   | 121.68   | -0.49   |        | 66.40    | 30.70    | -2.59   |        | 1.15   | 0.54   | -2.54   |        |
| Australia  | (21.39, | (17.46, | (-0.77, | <0.001 | (137.34, | (118.51, | (-0.59, | <0.001 | (63.74,  | (29.13,  | (-3.10, | <0.001 | (0.82, | (0.35, | (-3.04, | <0.001 |
|            | 24.61)  | 20.04)  | -0.68)  |        | 145.20)  | 124.93)  | -0.39)  |        | 69.15)   | 32.34)   | -2.07)  |        | 1.57)  | 0.81)  | -2.03)  |        |
|            | 31.02   | 30.32   | -0.07   |        | 174.60   | 186.99   | 0.24    |        | 71.46    | 28.73    | -3.15   |        | 1.24   | 0.48   | -3.25   |        |
| Austria    | (28.29, | (27.54, | (-0.09, | <0.001 | (167.96, | (180.20, | (0.22,  | <0.001 | (67.21,  | (26.09,  | (-4.57, | <0.001 | (0.74, | (0.20, | (-4.63, | <0.001 |
|            | 33.96)  | 33.34)  | -0.04)  |        | 181.45)  | 194.00)  | 0.25)   |        | 75.93)   | 31.60)   | -1.71)  |        | 1.98)  | 1.05)  | -1.84)  |        |
|            | 31.39   | 29.36   | -0.23   |        | 212.88   | 196.25   | -0.28   |        | 428.85   | 291.46   | -1.35   |        | 7.37   | 4.91   | -1.43   |        |
| Azerbaijan | (28.67, | (27.17, | (-0.25, | <0.001 | (205.43, | (190.58, | (-0.29, | <0.001 | (418.51, | (284.28, | (-1.94, | <0.001 | (6.06, | (4.02, | (-2.00, | <0.001 |
|            | 34.33)  | 31.71)  | -0.21)  |        | 220.54)  | 202.07)  | -0.26)  |        | 439.41)  | 298.80)  | -0.76)  |        | 8.89)  | 5.97)  | -0.86)  |        |
|            | 56.38   | 56.54   | 0.02    |        | 277.70   | 275.92   | -0.02   |        | 209.55   | 126.94   | -1.66   |        | 3.69   | 2.22   | -1.69   |        |
| Bahamas    | (38.67, | (41.11, | (-0.00, | 0.120  | (235.23, | (240.56, | (-0.03, | 0.025  | (172.97, | (103.32, | (-2.43, | <0.001 | (0.45, | (0.22, | (-2.49, | <0.001 |
|            | 79.84)  | 76.05)  | 0.04)   |        | 325.88)  | 315.21)  | -0.00)  |        | 251.85)  | 154.54)  | -0.89)  |        | 13.83) | 9.04)  | -0.88)  |        |
|            | 33.54   | 30.09   | -0.37   |        | 237.99   | 212.98   | -0.38   |        | 379.46   | 95.73    | -4.59   |        | 6.19   | 1.55   | -4.63   |        |
| Bahrain    | (22.97, | (23.82, | (-0.41, | <0.001 | (207.62, | (196.31, | (-0.40, | <0.001 | (341.10, | (83.86,  | (-5.66, | <0.001 | (2.22, | (0.41, | (-5.61, | <0.001 |
|            | 47.61)  | 37.71)  | -0.34)  |        | 271.76)  | 230.91)  | -0.36)  |        | 421.17)  | 108.97)  | -3.50)  |        | 14.03) | 4.36)  | -3.65)  |        |
|            | 19.24   | 19.47   | 0.04    |        | 133.72   | 139.09   | 0.13    |        | 504.01   | 265.15   | -2.06   |        | 8.71   | 4.58   | -2.07   |        |
| Bangladesh | (18.60, | (19.00, | (0.03,  | <0.001 | (131.95, | (137.82, | (0.07,  | <0.001 | (500.71, | (263.43, | (-3.08, | <0.001 | (8.28, | (4.35, | (-3.14, | <0.001 |
|            | 19.90)  | 19.94)  | 0.05)   |        | 135.51)  | 140.36)  | 0.18)   |        | 507.34)  | 266.89)  | -1.03)  |        | 9.16)  | 4.81)  | -0.98)  |        |
|            | 56.42   | 57.19   | 0.05    |        | 298.09   | 301.12   | 0.04    |        | 111.09   | 61.37    | -2.07   |        | 1.90   | 1.03   | -2.13   |        |
| Barbados   | (38.53, | (38.50, | (0.04,  | <0.001 | (254.72, | (256.68, | (0.03,  | <0.001 | (85.19,  | (42.20,  | (-2.69, | <0.001 | (0.06, | (0.00, | (-2.79, | <0.001 |
|            | 80.01)  | 82.24)  | 0.06)   |        | 346.96)  | 351.51)  | 0.04)   |        | 142.62)  | 86.78)   | -1.45)  |        | 10.66) | 10.09) | -1.48)  |        |
|            | 25.59   | 25.91   | 0.04    |        | 180.59   | 184.10   | 0.08    |        | 139.79   | 113.70   | -0.66   |        | 2.46   | 2.02   | -0.62   |        |
| Belarus    | (23.46, | (23.49, | (-0.00, | 0.055  | (174.92, | (177.89, | (0.05,  | <0.001 | (134.78, | (108.89, | (-2.07, | 0.364  | (1.84, | (1.43, | (-2.09, | 0.410  |
|            | 27.88)  | 28.56)  | 0.08)   |        | 186.41)  | 190.53)  | 0.10)   |        | 144.95)  | 118.72)  | 0.77)   |        | 3.24)  | 2.85)  | 0.87)   |        |
|            | 25.47   | 26.08   | 0.09    |        | 160.91   | 184.92   | 0.49    |        | 115.01   | 31.77    | -4.36   |        | 1.98   | 0.53   | -4.44   |        |
| Belgium    | (23.25, | (23.78, | (0.05,  | <0.001 | (155.33, | (178.88, | (0.44,  | <0.001 | (110.24, | (29.27,  | (-5.18, | <0.001 | (1.40, | (0.25, | (-5.13, | <0.001 |
|            | 27.85)  | 28.56)  | 0.13)   |        | 166.66)  | 191.13)  | 0.54)   |        | 119.95)  | 34.44)   | -3.53)  |        | 2.74)  | 1.00)  | -3.74)  |        |
|            | 57.25   | 60.42   | 0.20    |        | 286.45   | 305.61   | 0.23    |        | 136.46   | 104.04   | -1.29   |        | 2.36   | 1.77   | -1.38   |        |
| Belize     | (33.74, | (45.13, | (0.18,  | <0.001 | (227.26, | (269.22, | (0.20,  | <0.001 | (97.39,  | (83.46,  | (-2.10, | 0.002  | (0.01, | (0.13, | (-2.25, | 0.002  |
|            | 92.25)  | 79.35)  | 0.22)   |        | 357.03)  | 345.59)  | 0.26)   |        | 186.93)  | 128.24)  | -0.47)  |        | 19.38) | 7.76)  | -0.52)  |        |

|                   |         |         |         |        |          |          |         |        |          |          |         |        |        |        |         |        |
|-------------------|---------|---------|---------|--------|----------|----------|---------|--------|----------|----------|---------|--------|--------|--------|---------|--------|
|                   | 19.93   | 20.78   | 0.14    |        | 103.23   | 106.65   | 0.13    |        | 107.24   | 120.75   | 0.42    |        | 1.85   | 2.08   | 0.41    |        |
| Benin             | (17.01, | (18.92, | (0.12,  | <0.001 | (96.24,  | (102.24, | (0.07,  | <0.001 | (100.23, | (116.17, | (0.10,  | 0.010  | (1.03, | (1.51, | (0.04,  | 0.031  |
|                   | 23.23)  | 22.79)  | 0.17)   |        | 110.62)  | 111.21)  | 0.19)   |        | 114.64)  | 125.46)  | 0.74)   |        | 3.10)  | 2.80)  | 0.78)   |        |
|                   | 52.93   | 49.38   | -0.24   |        | 295.20   | 269.48   | -0.35   |        | 131.90   | 32.19    | -5.17   |        | 2.26   | 0.51   | -5.42   |        |
| Bermuda           | (21.95, | (15.64, | (-0.27, | <0.001 | (213.84, | (180.73, | (-0.49, | <0.001 | (78.67,  | (7.48,   | (-5.84, | <0.001 | (0.00, | (0.00, | (-6.55, | <0.001 |
|                   | 114.89) | 125.41) | -0.22)  |        | 403.42)  | 394.09)  | -0.20)  |        | 213.92)  | 100.13)  | -4.50)  |        | 44.50) | 53.41) | -4.28)  |        |
|                   | 21.05   | 20.29   | -0.12   |        | 144.08   | 141.10   | -0.07   |        | 422.99   | 273.60   | -1.52   |        | 7.42   | 4.78   | -1.54   |        |
| Bhutan            | (13.02, | (13.99, | (-0.17, | <0.001 | (120.70, | (123.39, | (-0.09, | <0.001 | (383.08, | (248.79, | (-1.82, | <0.001 | (3.01, | (2.03, | (-1.83, | <0.001 |
|                   | 32.49)  | 28.48)  | -0.07)  |        | 170.83)  | 160.65)  | -0.05)  |        | 466.12)  | 300.24)  | -1.22)  |        | 15.51) | 9.56)  | -1.24)  |        |
| Bolivia           | 8.28    | 8.02    | -0.11   |        | 69.88    | 69.26    | -0.02   |        | 322.59   | 144.34   | -2.74   |        | 5.49   | 2.45   | -2.74   |        |
| (Plurinational    | (6.72,  | (6.92,  | (-0.12, | <0.001 | (65.03,  | (65.90,  | (-0.09, | 0.644  | (312.38, | (139.52, | (-2.89, | <0.001 | (4.23, | (1.86, | (-2.90, | <0.001 |
| State of)         | 10.12)  | 9.24)   | -0.10)  |        | 74.99)   | 72.74)   | 0.06)   |        | 333.06)  | 149.28)  | -2.59)  |        | 7.04)  | 3.18)  | -2.59)  |        |
|                   | 18.80   | 17.82   | -0.19   |        | 162.97   | 161.23   | -0.02   |        | 155.24   | 99.45    | -1.42   |        | 2.65   | 1.69   | -1.42   |        |
| Bosnia and        | (16.13, | (14.43, | (-0.21, | <0.001 | (154.94, | (150.90, | (-0.09, | 0.486  | (147.39, | (91.30,  | (-2.46, | 0.008  | (1.72, | (0.79, | (-2.53, | 0.014  |
| Herzegovina       | 21.78)  | 21.83)  | -0.17)  |        | 171.32)  | 172.15)  | 0.04)   |        | 163.41)  | 108.20)  | -0.37)  |        | 3.93)  | 3.27)  | -0.29)  |        |
|                   | 24.63   | 24.85   | 0.03    |        | 95.60    | 99.97    | 0.14    |        | 106.79   | 157.41   | 1.37    |        | 1.88   | 2.76   | 1.26    |        |
| Botswana          | (18.68, | (20.85, | (0.01,  | 0.006  | (83.07,  | (91.82,  | (0.08,  | <0.001 | (93.65,  | (147.08, | (0.62,  | <0.001 | (0.52, | (1.55, | (0.60,  | <0.001 |
|                   | 32.00)  | 29.42)  | 0.04)   |        | 109.56)  | 108.69)  | 0.21)   |        | 121.33)  | 168.31)  | 2.12)   |        | 4.87)  | 4.59)  | 1.93)   |        |
|                   | 13.16   | 11.87   | -0.36   |        | 92.23    | 90.10    | -0.08   |        | 252.44   | 120.92   | -2.46   |        | 4.49   | 2.11   | -2.53   |        |
| Brazil            | (12.75, | (11.55, | (-0.45, | <0.001 | (91.13,  | (89.24,  | (-0.10, | <0.001 | (250.62, | (119.92, | (-2.71, | <0.001 | (4.25, | (1.98, | (-2.78, | <0.001 |
|                   | 13.57)  | 12.19)  | -0.26)  |        | 93.34)   | 90.96)   | -0.06)  |        | 254.27)  | 121.92)  | -2.21)  |        | 4.74)  | 2.25)  | -2.27)  |        |
|                   | 20.75   | 20.83   | 0.01    |        | 140.08   | 152.90   | 0.35    |        | 325.96   | 145.47   | -2.80   |        | 5.60   | 2.46   | -2.85   |        |
| Brunei Darussalam | (10.75, | (12.76, | (-0.02, | 0.406  | (110.65, | (129.64, | (-0.01, | 0.053  | (280.29, | (122.29, | (-2.98, | <0.001 | (1.20, | (0.38, | (-3.19, | <0.001 |
|                   | 36.67)  | 32.51)  | 0.05)   |        | 175.19)  | 179.47)  | 0.71)   |        | 377.18)  | 172.05)  | -2.62)  |        | 16.54) | 8.72)  | -2.50)  |        |
|                   | 16.58   | 16.75   | 0.03    |        | 140.23   | 148.81   | 0.24    |        | 261.34   | 172.04   | -1.54   |        | 4.55   | 3.00   | -1.55   |        |
| Bulgaria          | (14.59, | (14.33, | (0.01,  | 0.003  | (134.44, | (141.75, | (0.16,  | <0.001 | (253.34, | (164.32, | (-2.34, | <0.001 | (3.55, | (2.07, | (-2.37, | <0.001 |
|                   | 18.77)  | 19.52)  | 0.05)   |        | 146.21)  | 156.20)  | 0.31)   |        | 269.53)  | 180.09)  | -0.73)  |        | 5.74)  | 4.29)  | -0.71)  |        |
|                   | 19.07   | 19.51   | 0.08    |        | 96.99    | 97.95    | 0.04    |        | 171.27   | 164.71   | -0.10   |        | 2.97   | 2.82   | -0.14   |        |
| Burkina Faso      | (16.94, | (18.17, | (0.07,  | <0.001 | (91.99,  | (94.85,  | (0.01,  | 0.008  | (164.76, | (160.79, | (-0.62, | 0.703  | (2.16, | (2.33, | (-0.66, | 0.606  |
|                   | 21.40)  | 20.93)  | 0.08)   |        | 102.21)  | 101.14)  | 0.07)   |        | 177.99)  | 168.70)  | 0.42)   |        | 3.99)  | 3.40)  | 0.39)   |        |
|                   | 21.69   | 22.25   | 0.08    |        | 104.11   | 104.97   | 0.03    |        | 200.37   | 173.92   | -0.49   |        | 3.47   | 2.97   | -0.55   |        |
| Burundi           | (18.84, | (20.27, | (0.05,  | <0.001 | (97.56,  | (100.48, | (0.02,  | <0.001 | (191.43, | (168.33, | (-0.81, | 0.002  | (2.38, | (2.27, | (-0.87, | 0.001  |
|                   | 24.88)  | 24.39)  | 0.11)   |        | 111.01)  | 109.61)  | 0.04)   |        | 209.63)  | 179.66)  | -0.18)  |        | 4.92)  | 3.82)  | -0.22)  |        |

|                             |         |         |         |        |          |          |         |        |          |          |         |        |        |        |         |        |
|-----------------------------|---------|---------|---------|--------|----------|----------|---------|--------|----------|----------|---------|--------|--------|--------|---------|--------|
|                             | 19.82   | 21.04   | 0.20    |        | 117.23   | 124.45   | 0.20    |        | 100.58   | 80.61    | -0.66   |        | 1.75   | 1.38   | -0.72   |        |
| Cabo Verde                  | (10.02, | (13.63, | (0.19,  | <0.001 | (89.81,  | (105.11, | (0.18,  | <0.001 | (75.75,  | (65.20,  | (-1.48, | 0.120  | (0.04, | (0.12, | (-1.57, | 0.099  |
|                             | 36.03)  | 31.12)  | 0.21)   |        | 150.83)  | 146.37)  | 0.22)   |        | 131.48)  | 98.63)   | 0.17)   |        | 11.30) | 5.77)  | 0.14)   |        |
|                             | 18.13   | 17.13   | -0.19   |        | 117.12   | 110.44   | -0.18   |        | 310.34   | 182.85   | -1.78   |        | 5.44   | 3.18   | -1.81   |        |
| Cambodia                    | (16.25, | (15.79, | (-0.22, | <0.001 | (112.18, | (106.99, | (-0.26, | <0.001 | (302.36, | (178.41, | (-1.97, | <0.001 | (4.43, | (2.61, | (-2.00, | <0.001 |
|                             | 20.17)  | 18.55)  | -0.16)  |        | 122.23)  | 113.99)  | -0.09)  |        | 318.48)  | 187.39)  | -1.59)  |        | 6.63)  | 3.83)  | -1.62)  |        |
|                             | 17.73   | 19.79   | 0.38    |        | 82.53    | 92.03    | 0.38    |        | 109.87   | 126.95   | 0.52    |        | 1.89   | 2.18   | 0.52    |        |
| Cameroon                    | (15.79, | (18.64, | (0.34,  | <0.001 | (78.14,  | (89.45,  | (0.35,  | <0.001 | (104.93, | (124.00, | (0.29,  | <0.001 | (1.29, | (1.80, | (0.31,  | <0.001 |
|                             | 19.85)  | 21.01)  | 0.43)   |        | 87.12)   | 94.66)   | 0.41)   |        | 114.99)  | 129.96)  | 0.75)   |        | 2.70)  | 2.61)  | 0.74)   |        |
|                             | 33.90   | 28.31   | -0.60   |        | 170.03   | 160.49   | -0.22   |        | 67.61    | 36.13    | -2.10   |        | 1.11   | 0.60   | -2.06   |        |
| Canada                      | (32.43, | (26.98, | (-0.64, | <0.001 | (166.79, | (157.39, | (-0.26, | <0.001 | (65.55,  | (34.67,  | (-2.92, | <0.001 | (0.86, | (0.42, | (-2.99, | <0.001 |
|                             | 35.42)  | 29.69)  | -0.56)  |        | 173.33)  | 163.64)  | -0.17)  |        | 69.73)   | 37.65)   | -1.28)  |        | 1.42)  | 0.83)  | -1.11)  |        |
|                             | 25.16   | 25.13   | -0.00   |        | 98.23    | 99.58    | 0.07    |        | 175.00   | 197.75   | 0.43    |        | 3.08   | 3.49   | 0.42    |        |
| Central African<br>Republic | (20.80, | (22.06, | (-0.03, | 0.719  | (89.12,  | (93.21,  | (-0.04, | 0.194  | (162.94, | (188.84, | (-0.20, | 0.180  | (1.67, | (2.39, | (-0.05, | 0.080  |
|                             | 30.21)  | 28.53)  | 0.02)   |        | 108.06)  | 106.29)  | 0.17)   |        | 187.76)  | 206.98)  | 1.07)   |        | 5.28)  | 4.93)  | 0.89)   |        |
|                             | 19.01   | 20.78   | 0.30    |        | 97.87    | 107.21   | 0.33    |        | 115.23   | 131.23   | 0.54    |        | 2.00   | 2.27   | 0.54    |        |
| Chad                        | (16.38, | (19.04, | (0.27,  | <0.001 | (91.64,  | (103.06, | (0.28,  | <0.001 | (108.60, | (126.77, | (0.28,  | <0.001 | (1.21, | (1.71, | (0.22,  | 0.001  |
|                             | 21.95)  | 22.65)  | 0.33)   |        | 104.43)  | 111.49)  | 0.37)   |        | 122.18)  | 135.82)  | 0.81)   |        | 3.12)  | 2.96)  | 0.86)   |        |
|                             | 15.84   | 14.78   | -0.24   |        | 108.22   | 108.14   | 0.02    |        | 49.10    | 22.52    | -2.52   |        | 0.85   | 0.38   | -2.67   |        |
| Chile                       | (14.42, | (13.54, | (-0.27, | <0.001 | (104.36, | (104.76, | (-0.08, | 0.733  | (46.51,  | (20.98,  | (-3.01, | <0.001 | (0.54, | (0.21, | (-3.51, | <0.001 |
|                             | 17.38)  | 16.12)  | -0.21)  |        | 112.18)  | 111.62)  | 0.11)   |        | 51.80)   | 24.14)   | -2.04)  |        | 1.28)  | 0.66)  | -1.82)  |        |
|                             | 16.20   | 17.32   | 0.23    |        | 191.08   | 216.51   | 0.43    |        | 260.48   | 137.56   | -2.21   |        | 4.42   | 2.24   | -2.36   |        |
| China                       | (16.04, | (17.16, | (0.22,  | <0.001 | (190.53, | (215.96, | (0.41,  | <0.001 | (259.84, | (137.10, | (-3.00, | <0.001 | (4.33, | (2.18, | (-3.14, | <0.001 |
|                             | 16.36)  | 17.48)  | 0.25)   |        | 191.63)  | 217.05)  | 0.44)   |        | 261.11)  | 138.01)  | -1.41)  |        | 4.50)  | 2.30)  | -1.57)  |        |
|                             | 19.91   | 17.24   | -0.48   |        | 131.65   | 118.96   | -0.35   |        | 235.69   | 94.89    | -3.07   |        | 4.09   | 1.60   | -3.16   |        |
| Colombia                    | (18.86, | (16.43, | (-0.56, | <0.001 | (128.85, | (116.80, | (-0.37, | <0.001 | (231.99, | (92.96,  | (-3.51, | <0.001 | (3.61, | (1.36, | (-3.61, | <0.001 |
|                             | 21.00)  | 18.09)  | -0.41)  |        | 134.50)  | 121.15)  | -0.33)  |        | 239.44)  | 96.85)   | -2.63)  |        | 4.61)  | 1.88)  | -2.70)  |        |
|                             | 21.67   | 21.39   | -0.05   |        | 119.27   | 115.83   | -0.11   |        | 134.19   | 174.44   | 0.69    |        | 2.31   | 2.99   | 0.68    |        |
| Comoros                     | (12.37, | (14.37, | (-0.08, | <0.001 | (94.84,  | (98.27,  | (-0.16, | <0.001 | (108.94, | (153.08, | (-2.07, | 0.628  | (0.20, | (0.83, | (-1.95, | 0.615  |
|                             | 35.64)  | 30.73)  | -0.02)  |        | 148.28)  | 135.68)  | -0.07)  |        | 163.85)  | 198.01)  | 3.53)   |        | 9.89)  | 7.71)  | 3.38)   |        |
|                             | 25.51   | 24.51   | -0.14   |        | 109.54   | 106.57   | -0.07   |        | 212.28   | 181.09   | -0.60   |        | 3.76   | 3.21   | -0.60   |        |
| Congo                       | (20.83, | (21.61, | (-0.17, | <0.001 | (99.30,  | (100.41, | (-0.15, | 0.095  | (198.07, | (173.06, | (-1.39, | 0.135  | (2.08, | (2.22, | (-1.40, | 0.141  |
|                             | 30.97)  | 27.69)  | -0.11)  |        | 120.58)  | 113.01)  | 0.01)   |        | 227.27)  | 189.41)  | 0.19)   |        | 6.30)  | 4.49)  | 0.20)   |        |



|                   |         |         |         |        |          |          |         |        |          |          |         |        |         |         |         |        |
|-------------------|---------|---------|---------|--------|----------|----------|---------|--------|----------|----------|---------|--------|---------|---------|---------|--------|
|                   | 19.47   | 19.88   | 0.07    |        | 184.70   | 192.88   | 0.15    |        | 200.06   | 124.43   | -1.61   |        | 3.46    | 2.10    | -1.69   |        |
| Cook Islands      | (0.09,  | (0.06,  | (0.03,  | 0.002  | (68.27,  | (70.00,  | (0.14,  | <0.001 | (77.77,  | (32.45,  | (-1.77, | <0.001 | (0.00,  | (0.00,  | (-1.88, | <0.001 |
|                   | 156.54) | 161.87) | 0.12)   |        | 404.75)  | 424.15)  | 0.16)   |        | 425.33)  | 327.45)  | -1.44)  |        | 127.70) | 128.12) | -1.49)  |        |
|                   | 19.92   | 18.25   | -0.30   |        | 139.59   | 134.79   | -0.12   |        | 135.06   | 67.84    | -2.15   |        | 2.36    | 1.16    | -2.17   |        |
| Costa Rica        | (16.56, | (15.73, | (-0.31, | <0.001 | (130.21, | (127.82, | (-0.14, | <0.001 | (125.86, | (62.90,  | (-2.58, | <0.001 | (1.28,  | (0.60,  | (-2.64, | <0.001 |
|                   | 23.79)  | 21.09)  | -0.29)  |        | 149.50)  | 142.06)  | -0.10)  |        | 144.77)  | 73.09)   | -1.71)  |        | 4.00)   | 2.07)   | -1.69)  |        |
|                   | 21.80   | 23.20   | 0.20    |        | 105.09   | 109.95   | 0.18    |        | 146.43   | 141.06   | -0.13   |        | 2.56    | 2.45    | -0.15   |        |
| Cote d'Ivoire     | (19.79, | (21.88, | (0.18,  | <0.001 | (100.42, | (107.02, | (0.13,  | <0.001 | (141.02, | (137.77, | (-0.52, | 0.530  | (1.88,  | (2.03,  | (-0.48, | 0.376  |
|                   | 23.98)  | 24.57)  | 0.23)   |        | 109.92)  | 112.95)  | 0.23)   |        | 152.00)  | 144.40)  | 0.27)   |        | 3.41)   | 2.93)   | 0.18)   |        |
|                   | 15.63   | 13.11   | -0.60   |        | 170.03   | 151.35   | -0.37   |        | 137.63   | 41.21    | -4.30   |        | 2.37    | 0.67    | -4.49   |        |
| Croatia           | (13.20, | (10.51, | (-0.65, | <0.001 | (161.93, | (142.44, | (-0.53, | <0.001 | (130.32, | (36.63,  | (-5.30, | <0.001 | (1.51,  | (0.21,  | (-5.51, | <0.001 |
|                   | 18.42)  | 16.25)  | -0.56)  |        | 178.46)  | 160.75)  | -0.22)  |        | 145.27)  | 46.28)   | -3.30)  |        | 3.60)   | 1.75)   | -3.46)  |        |
|                   | 52.94   | 49.60   | -0.23   |        | 280.38   | 255.11   | -0.33   |        | 223.30   | 66.35    | -3.99   |        | 3.96    | 1.14    | -4.12   |        |
| Cuba              | (49.97, | (46.43, | (-0.24, | <0.001 | (273.29, | (247.90, | (-0.39, | <0.001 | (216.97, | (62.68,  | (-4.44, | <0.001 | (3.15,  | (0.70,  | (-4.62, | <0.001 |
|                   | 56.04)  | 52.94)  | -0.21)  |        | 287.61)  | 262.49)  | -0.27)  |        | 229.77)  | 70.19)   | -3.53)  |        | 4.91)   | 1.76)   | -3.62)  |        |
|                   | 13.99   | 14.65   | 0.18    |        | 119.99   | 167.70   | 1.36    |        | 137.66   | 40.07    | -4.16   |        | 2.48    | 0.69    | -4.31   |        |
| Cyprus            | (8.71,  | (10.35, | (0.14,  | <0.001 | (103.30, | (153.19, | (0.70,  | <0.001 | (119.70, | (33.21,  | (-5.35, | <0.001 | (0.64,  | (0.09,  | (-5.67, | <0.001 |
|                   | 21.44)  | 20.59)  | 0.21)   |        | 138.72)  | 183.62)  | 2.02)   |        | 157.66)  | 48.38)   | -2.97)  |        | 6.70)   | 3.44)   | -2.92)  |        |
|                   | 27.61   | 25.35   | -0.29   |        | 212.91   | 191.11   | -0.38   |        | 98.30    | 31.79    | -3.88   |        | 1.69    | 0.51    | -4.11   |        |
| Czechia           | (25.25, | (22.93, | (-0.31, | <0.001 | (206.48, | (184.66, | (-0.42, | <0.001 | (93.96,  | (29.19,  | (-4.71, | <0.001 | (1.17,  | (0.23,  | (-5.02, | <0.001 |
|                   | 30.13)  | 28.00)  | -0.27)  |        | 219.51)  | 197.76)  | -0.35)  |        | 102.79)  | 34.60)   | -3.03)  |        | 2.38)   | 1.04)   | -3.19)  |        |
| Democratic        | 14.15   | 15.41   | 0.30    |        | 158.58   | 171.55   | 0.28    |        | 296.91   | 303.51   | 0.09    |        | 5.03    | 5.14    | 0.08    |        |
| People's Republic | (13.00, | (14.33, | (0.27,  | <0.001 | (154.60, | (167.91, | (0.26,  | <0.001 | (291.59, | (298.63, | (-0.07, | 0.271  | (4.36,  | (4.52,  | (-0.06, | 0.261  |
| of Korea          | 15.38)  | 16.55)  | 0.32)   |        | 162.64)  | 175.26)  | 0.29)   |        | 302.31)  | 308.45)  | 0.24)   |        | 5.79)   | 5.82)   | 0.22)   |        |
| Democratic        | 23.56   | 22.75   | -0.12   |        | 103.86   | 99.91    | -0.13   |        | 160.23   | 130.00   | -0.83   |        | 2.80    | 2.27    | -0.83   |        |
| Republic of the   | (22.37, | (21.99, | (-0.15, | <0.001 | (101.28, | (98.28,  | (-0.14, | <0.001 | (157.07, | (128.17, | (-1.11, | <0.001 | (2.40,  | (2.04,  | (-1.12, | <0.001 |
| Congo             | 24.80)  | 23.53)  | -0.10)  |        | 106.49)  | 101.57)  | -0.12)  |        | 163.43)  | 131.86)  | -0.54)  |        | 3.26)   | 2.53)   | -0.54)  |        |
|                   | 35.72   | 30.27   | -0.55   |        | 212.69   | 194.94   | -0.30   |        | 64.71    | 11.84    | -5.65   |        | 1.12    | 0.19    | -5.91   |        |
| Denmark           | (32.02, | (26.79, | (-0.59, | <0.001 | (203.60, | (185.94, | (-0.32, | <0.001 | (59.76,  | (9.70,   | (-6.97, | <0.001 | (0.56,  | (0.02,  | (-7.94, | <0.001 |
|                   | 39.75)  | 34.10)  | -0.52)  |        | 222.10)  | 204.28)  | -0.28)  |        | 69.99)   | 14.33)   | -4.31)  |        | 2.05)   | 0.80)   | -3.82)  |        |
|                   | 20.26   | 21.67   | 0.23    |        | 109.16   | 116.76   | 0.23    |        | 89.20    | 119.90   | 1.17    |        | 1.52    | 2.05    | 1.18    |        |
| Djibouti          | (11.44, | (16.34, | (0.21,  | <0.001 | (86.28,  | (104.05, | (0.21,  | <0.001 | (69.15,  | (106.77, | (0.37,  | 0.004  | (0.06,  | (0.68,  | (0.44,  | 0.002  |
|                   | 33.52)  | 28.30)  | 0.24)   |        | 136.39)  | 130.70)  | 0.25)   |        | 113.49)  | 134.30)  | 1.98)   |        | 8.30)   | 4.88)   | 1.92)   |        |

|                   |         |         |         |        |          |          |         |        |          |          |         |        |         |         |         |        |
|-------------------|---------|---------|---------|--------|----------|----------|---------|--------|----------|----------|---------|--------|---------|---------|---------|--------|
|                   | 55.09   | 55.60   | 0.04    |        | 268.91   | 270.66   | 0.02    |        | 169.53   | 90.88    | -2.15   |        | 2.96    | 1.55    | -2.24   |        |
| Dominica          | (21.82, | (22.37, | (0.02,  | <0.001 | (182.80, | (187.53, | (0.01,  | <0.001 | (103.67, | (46.10,  | (-2.63, | <0.001 | (0.00,  | (0.00,  | (-2.77, | <0.001 |
|                   | 117.11) | 114.88) | 0.05)   |        | 382.65)  | 378.32)  | 0.03)   |        | 263.10)  | 161.14)  | -1.68)  |        | 40.42)  | 33.12)  | -1.71)  |        |
| Dominican         | 50.84   | 54.55   | 0.24    |        | 242.94   | 267.34   | 0.33    |        | 463.18   | 509.14   | 0.32    |        | 8.03    | 8.83    | 0.32    |        |
| Republic          | (47.20, | (51.51, | (0.23,  | <0.001 | (234.58, | (260.46, | (0.32,  | <0.001 | (451.91, | (499.70, | (-0.23, | 0.257  | (6.60,  | (7.62,  | (-0.23, | 0.260  |
|                   | 54.70)  | 57.74)  | 0.25)   |        | 251.52)  | 274.35)  | 0.34)   |        | 474.66)  | 518.71)  | 0.88)   |        | 9.70)   | 10.18)  | 0.87)   |        |
|                   | 8.10    | 8.18    | 0.04    |        | 73.92    | 79.25    | 0.23    |        | 297.35   | 151.73   | -2.31   |        | 5.06    | 2.57    | -2.37   |        |
| Ecuador           | (6.89,  | (7.26,  | (0.00,  | 0.038  | (69.99,  | (76.31,  | (0.17,  | <0.001 | (289.69, | (147.69, | (-3.15, | <0.001 | (4.09,  | (2.07,  | (-3.25, | <0.001 |
|                   | 9.49)   | 9.18)   | 0.07)   |        | 78.01)   | 82.27)   | 0.29)   |        | 305.17)  | 155.85)  | -1.47)  |        | 6.19)   | 3.16)   | -1.47)  |        |
|                   |         |         |         |        |          |          |         |        | 1312.64  |          |         |        |         |         |         |        |
| Egypt             | 32.11   | 31.51   | -0.07   |        | 216.20   | 218.36   | 0.05    |        | (1305.55 | 711.60   | -1.92   |        | 22.34   | 12.16   | -1.91   |        |
|                   | (30.99, | (30.73, | (-0.08, | <0.001 | (213.23, | (216.29, | (-0.07, | 0.396  | ,        | (707.88, | (-2.65, | <0.001 | (21.42, | (11.68, | (-2.64, | <0.001 |
|                   | 33.26)  | 32.30)  | -0.05)  |        | 219.19)  | 220.45)  | 0.17)   |        | 1319.76) | 715.33)  | -1.19)  |        | 23.30)  | 12.66)  | -1.17)  |        |
|                   |         |         |         |        |          |          |         |        |          |          |         |        |         |         |         |        |
| El Salvador       | 17.24   | 17.33   | 0.03    |        | 103.22   | 114.56   | 0.36    |        | 440.53   | 164.62   | -3.43   |        | 7.50    | 2.80    | -3.43   |        |
|                   | (14.71, | (15.15, | (-0.02, | 0.229  | (96.61,  | (108.75, | (0.33,  | <0.001 | (427.38, | (157.73, | (-4.21, | <0.001 | (5.85,  | (1.97,  | (-4.22, | <0.001 |
|                   | 20.12)  | 19.74)  | 0.07)   |        | 110.17)  | 120.60)  | 0.38)   |        | 454.00)  | 171.74)  | -2.65)  |        | 9.48)   | 3.88)   | -2.64)  |        |
|                   | 24.59   | 21.51   | -0.47   |        | 104.64   | 95.53    | -0.31   |        | 175.57   | 82.35    | -2.48   |        | 3.10    | 1.42    | -2.55   |        |
| Equatorial Guinea | (14.62, | (16.17, | (-0.49, | <0.001 | (82.31,  | (83.55,  | (-0.34, | <0.001 | (146.48, | (71.47,  | (-3.29, | <0.001 | (0.44,  | (0.34,  | (-3.38, | <0.001 |
|                   | 38.95)  | 28.13)  | -0.44)  |        | 131.27)  | 108.80)  | -0.28)  |        | 208.87)  | 94.48)   | -1.66)  |        | 10.72)  | 3.98)   | -1.72)  |        |
|                   | 19.73   | 19.35   | -0.07   |        | 96.17    | 93.21    | -0.11   |        | 101.44   | 128.48   | 0.85    |        | 1.75    | 2.22    | 0.85    |        |
| Eritrea           | (16.04, | (16.99, | (-0.11, | <0.001 | (87.57,  | (87.78,  | (-0.12, | <0.001 | (92.76,  | (122.25, | (0.65,  | <0.001 | (0.78,  | (1.46,  | (0.65,  | <0.001 |
|                   | 24.05)  | 21.97)  | -0.04)  |        | 105.41)  | 98.89)   | -0.10)  |        | 110.74)  | 134.97)  | 1.04)   |        | 3.43)   | 3.24)   | 1.05)   |        |
|                   | 39.04   | 38.64   | -0.04   |        | 241.57   | 238.64   | -0.08   |        | 108.29   | 34.49    | -3.72   |        | 1.87    | 0.56    | -3.97   |        |
| Estonia           | (32.24, | (30.68, | (-0.07, | 0.023  | (224.54, | (218.96, | (-0.23, | 0.286  | (96.88,  | (27.17,  | (-5.94, | 0.002  | (0.67,  | (0.03,  | (-6.08, | <0.001 |
|                   | 46.94)  | 48.37)  | -0.01)  |        | 259.65)  | 259.94)  | 0.07)   |        | 120.76)  | 43.54)   | -1.43)  |        | 4.31)   | 3.52)   | -1.81)  |        |
|                   | 25.20   | 25.72   | 0.07    |        | 100.51   | 104.71   | 0.14    |        | 107.05   | 117.35   | 0.25    |        | 1.86    | 2.03    | 0.24    |        |
| Eswatini          | (17.50, | (19.78, | (0.04,  | <0.001 | (83.81,  | (92.07,  | (0.12,  | <0.001 | (90.14,  | (104.09, | (-0.37, | 0.425  | (0.30,  | (0.65,  | (-0.40, | 0.469  |
|                   | 35.36)  | 32.95)  | 0.10)   |        | 119.68)  | 118.66)  | 0.17)   |        | 126.37)  | 131.89)  | 0.87)   |        | 6.36)   | 4.88)   | 0.88)   |        |
|                   | 17.36   | 17.80   | 0.08    |        | 79.71    | 80.96    | 0.05    |        | 284.28   | 112.96   | -3.13   |        | 4.90    | 1.91    | -3.17   |        |
| Ethiopia          | (16.49, | (17.21, | (0.06,  | <0.001 | (77.77,  | (79.66,  | (0.03,  | <0.001 | (280.74, | (111.49, | (-3.34, | <0.001 | (4.44,  | (1.72,  | (-3.42, | <0.001 |
|                   | 18.27)  | 18.41)  | 0.10)   |        | 81.68)   | 82.28)   | 0.07)   |        | 287.86)  | 114.45)  | -2.92)  |        | 5.39)   | 2.12)   | -2.92)  |        |
|                   | 21.58   | 21.65   | 0.02    |        | 192.64   | 196.29   | 0.08    |        | 378.75   | 343.67   | -0.35   |        | 6.60    | 5.96    | -0.37   |        |
| Fiji              | (14.78, | (15.35, | (-0.03, | 0.356  | (170.66, | (176.29, | (0.03,  | 0.004  | (347.98, | (316.95, | (-0.67, | 0.032  | (3.11,  | (2.93,  | (-0.72, | 0.041  |

|           |         |         |         |        |          |          |         |        |          |          |         |        |        |        |         |        |
|-----------|---------|---------|---------|--------|----------|----------|---------|--------|----------|----------|---------|--------|--------|--------|---------|--------|
|           | 30.53)  | 29.70)  | 0.07)   |        | 216.73)  | 217.97)  | 0.13)   |        | 411.59)  | 372.07)  | -0.03)  |        | 12.37) | 10.82) | -0.02)  |        |
|           | 38.65)  | 34.02)  | -0.42)  |        | 225.93)  | 214.47)  | -0.19)  |        | 58.25)   | 18.58)   | -4.25)  |        | 1.00)  | 0.30)  | -4.47)  |        |
| Finland   | (34.75, | (30.19, | (-0.47, | <0.001 | (216.68, | (204.97, | (-0.23, | <0.001 | (53.63,  | (15.86,  | (-4.86, | <0.001 | (0.48, | (0.06, | (-5.11, | <0.001 |
|           | 42.92)  | 38.24)  | -0.38)  |        | 235.52)  | 224.34)  | -0.15)  |        | 63.22)   | 21.67)   | -3.63)  |        | 1.92)  | 1.02)  | -3.81)  |        |
|           | 23.21)  | 22.63)  | -0.07)  |        | 153.08)  | 167.65)  | 0.33)   |        | 42.84)   | 23.25)   | -2.09)  |        | 0.72)  | 0.39)  | -2.08)  |        |
| France    | (22.33, | (21.71, | (-0.12, | 0.034  | (150.84, | (165.20, | (0.25,  | <0.001 | (41.65,  | (22.35,  | (-2.44, | <0.001 | (0.57, | (0.28, | (-2.47, | <0.001 |
|           | 24.13)  | 23.58)  | -0.01)  |        | 155.36)  | 170.12)  | 0.41)   |        | 44.05)   | 24.19)   | -1.73)  |        | 0.89)  | 0.53)  | -1.69)  |        |
|           | 22.47)  | 22.48)  | 0.00)   |        | 103.26)  | 104.73)  | 0.04)   |        | 113.80)  | 84.63)   | -1.06)  |        | 1.99)  | 1.47)  | -1.09)  |        |
| Gabon     | (15.72, | (17.89, | (-0.00, | 0.465  | (87.60,  | (94.33,  | (0.00,  | 0.039  | (97.58,  | (75.39,  | (-1.48, | <0.001 | (0.41, | (0.49, | (-1.50, | <0.001 |
|           | 31.29)  | 27.93)  | 0.01)   |        | 121.00)  | 115.98)  | 0.08)   |        | 132.05)  | 94.71)   | -0.65)  |        | 5.99)  | 3.40)  | -0.67)  |        |
|           | 22.55)  | 24.59)  | 0.30)   |        | 123.72)  | 132.66)  | 0.26)   |        | 110.84)  | 140.03)  | 0.89)   |        | 1.93)  | 2.46)  | 0.93)   |        |
| Gambia    | (15.93, | (20.12, | (0.29,  | <0.001 | (106.78, | (121.67, | (0.18,  | <0.001 | (95.07,  | (128.84, | (-0.08, | 0.071  | (0.40, | (1.18, | (-0.06, | 0.065  |
|           | 31.23)  | 29.81)  | 0.30)   |        | 142.73)  | 144.41)  | 0.34)   |        | 128.63)  | 151.98)  | 1.86)   |        | 5.91)  | 4.57)  | 1.92)   |        |
|           | 30.37)  | 31.25)  | 0.10)   |        | 206.72)  | 219.17)  | 0.21)   |        | 565.42)  | 146.57)  | -4.46)  |        | 9.79)  | 2.48)  | -4.54)  |        |
| Georgia   | (27.23, | (27.01, | (0.09,  | <0.001 | (198.39, | (208.03, | (0.17,  | <0.001 | (551.51, | (137.16, | (-5.53, | <0.001 | (8.04, | (1.41, | (-5.68, | <0.001 |
|           | 33.80)  | 36.05)  | 0.12)   |        | 215.33)  | 230.84)  | 0.24)   |        | 579.61)  | 156.53)  | -3.38)  |        | 11.83) | 4.19)  | -3.38)  |        |
|           | 34.83)  | 30.52)  | -0.44)  |        | 208.10)  | 206.77)  | -0.02)  |        | 112.33)  | 35.64)   | -3.95)  |        | 1.93)  | 0.60)  | -4.05)  |        |
| Germany   | (33.90, | (29.56, | (-0.48, | <0.001 | (205.84, | (204.37, | (-0.07, | 0.261  | (110.64, | (34.64,  | (-4.28, | <0.001 | (1.72, | (0.48, | (-4.41, | <0.001 |
|           | 35.78)  | 31.50)  | -0.41)  |        | 210.39)  | 209.20)  | 0.02)   |        | 114.04)  | 36.68)   | -3.61)  |        | 2.17)  | 0.75)  | -3.68)  |        |
|           | 21.07)  | 22.30)  | 0.20)   |        | 110.60)  | 116.22)  | 0.19)   |        | 259.05)  | 176.69)  | -1.35)  |        | 4.53)  | 3.06)  | -1.39)  |        |
| Ghana     | (19.36, | (21.18, | (0.14,  | <0.001 | (106.51, | (113.61, | (0.14,  | <0.001 | (252.87, | (173.51, | (-1.72, | <0.001 | (3.74, | (2.65, | (-1.77, | <0.001 |
|           | 22.90)  | 23.46)  | 0.26)   |        | 114.81)  | 118.88)  | 0.24)   |        | 265.34)  | 179.92)  | -0.98)  |        | 5.45)  | 3.51)  | -1.00)  |        |
|           | 21.97)  | 23.16)  | 0.20)   |        | 138.24)  | 166.03)  | 0.64)   |        | 124.66)  | 89.51)   | -0.95)  |        | 2.14)  | 1.56)  | -0.92)  |        |
| Greece    | (19.90, | (20.75, | (0.15,  | <0.001 | (133.02, | (159.87, | (0.59,  | <0.001 | (119.70, | (84.98,  | (-1.68, | 0.011  | (1.54, | (1.02, | (-1.65, | 0.014  |
|           | 24.19)  | 25.79)  | 0.26)   |        | 143.62)  | 172.40)  | 0.69)   |        | 129.78)  | 94.24)   | -0.22)  |        | 2.91)  | 2.33)  | -0.19)  |        |
|           | 34.21)  | 29.98)  | -0.43)  |        | 142.67)  | 142.42)  | -0.01)  |        | 146.87)  | 58.75)   | -3.13)  |        | 2.64)  | 1.05)  | -3.17)  |        |
| Greenland | (9.63,  | (6.40,  | (-0.47, | <0.001 | (82.31,  | (79.30,  | (-0.03, | 0.330  | (84.92,  | (21.75,  | (-3.39, | <0.001 | (0.00, | (0.00, | (-3.45, | <0.001 |
|           | 96.27)  | 92.00)  | -0.39)  |        | 236.73)  | 239.87)  | 0.01)   |        | 242.76)  | 132.16)  | -2.86)  |        | 51.11) | 46.72) | -2.89)  |        |
|           | 57.74)  | 58.94)  | 0.08)   |        | 288.59)  | 297.97)  | 0.12)   |        | 227.53)  | 99.20)   | -2.69)  |        | 3.97)  | 1.72)  | -2.70)  |        |
| Grenada   | (26.07, | (29.67, | (0.06,  | <0.001 | (207.58, | (223.89, | (0.10,  | <0.001 | (157.03, | (58.70,  | (-3.27, | <0.001 | (0.01, | (0.00, | (-3.25, | <0.001 |
|           | 112.35) | 106.09) | 0.09)   |        | 391.62)  | 389.34)  | 0.14)   |        | 319.98)  | 157.65)  | -2.12)  |        | 35.42) | 25.42) | -2.14)  |        |
|           | 17.26)  | 19.61)  | 0.46)   |        | 162.94)  | 196.12)  | 0.64)   |        | 180.70)  | 348.44)  | 2.19)   |        | 3.08)  | 6.07)  | 2.25)   |        |
| Guam      | (5.52,  | (6.75,  | (0.40,  | <0.001 | (119.10, | (147.17, | (0.57,  | <0.001 | (134.51, | (282.10, | (1.32,  | <0.001 | (0.05, | (0.53, | (1.15,  | <0.001 |

|               |         |         |         |        |          |          |         |        |          |          |         |        |         |        |         |        |
|---------------|---------|---------|---------|--------|----------|----------|---------|--------|----------|----------|---------|--------|---------|--------|---------|--------|
|               | 41.09)  | 44.72)  | 0.52)   |        | 217.89)  | 256.37)  | 0.70)   |        | 237.92)  | 425.92)  | 3.06)   |        | 19.60)  | 24.88) | 3.36)   |        |
|               | 15.96   | 16.74   | 0.17    |        | 84.74    | 98.11    | 0.51    |        | 768.38   | 254.52   | -4.02   |        | 13.07   | 4.32   | -4.04   |        |
| Guatemala     | (13.89, | (15.48, | (0.15,  | <0.001 | (79.75,  | (94.94,  | (0.49,  | <0.001 | (753.77, | (249.51, | (-5.92, | <0.001 | (11.21, | (3.68, | (-5.97, | <0.001 |
|               | 18.26)  | 18.09)  | 0.19)   |        | 89.98)   | 101.35)  | 0.53)   |        | 783.22)  | 259.60)  | -2.08)  |        | 15.16)  | 5.03)  | -2.07)  |        |
|               | 17.79   | 20.41   | 0.46    |        | 84.67    | 97.07    | 0.49    |        | 142.16   | 179.26   | 0.84    |        | 2.47    | 3.12   | 0.85    |        |
| Guinea        | (15.35, | (18.62, | (0.40,  | <0.001 | (79.14,  | (93.00,  | (0.41,  | <0.001 | (135.09, | (173.84, | (0.61,  | <0.001 | (1.61,  | (2.43, | (0.63,  | <0.001 |
|               | 20.51)  | 22.34)  | 0.52)   |        | 90.49)   | 101.27)  | 0.56)   |        | 149.52)  | 184.82)  | 1.07)   |        | 3.63)   | 3.94)  | 1.06)   |        |
|               | 22.05   | 23.66   | 0.24    |        | 108.94   | 115.18   | 0.22    |        | 246.71   | 261.79   | 0.23    |        | 4.36    | 4.64   | 0.23    |        |
| Guinea-Bissau | (15.68, | (19.05, | (0.23,  | <0.001 | (93.71,  | (104.44, | (0.11,  | <0.001 | (223.76, | (245.58, | (0.12,  | <0.001 | (1.81,  | (2.70, | (0.11,  | <0.001 |
|               | 30.27)  | 29.10)  | 0.25)   |        | 126.00)  | 126.75)  | 0.33)   |        | 271.44)  | 278.83)  | 0.33)   |        | 8.94)   | 7.48)  | 0.35)   |        |
|               | 62.11   | 61.01   | -0.06   |        | 284.78   | 279.41   | -0.05   |        | 371.16   | 256.47   | -1.25   |        | 6.49    | 4.50   | -1.25   |        |
| Guyana        | (50.36, | (49.29, | (-0.09, | <0.001 | (258.01, | (252.98, | (-0.09, | 0.070  | (340.98, | (231.40, | (-2.34, | 0.025  | (3.06,  | (1.75, | (-2.33, | 0.027  |
|               | 75.93)  | 74.75)  | -0.04)  |        | 313.66)  | 307.89)  | 0.00)   |        | 403.41)  | 283.58)  | -0.16)  |        | 12.23)  | 9.51)  | -0.14)  |        |
|               | 60.26   | 60.39   | 0.01    |        | 240.44   | 239.31   | 0.01    |        | 578.29   | 385.45   | -1.39   |        | 10.20   | 6.78   | -1.35   |        |
| Haiti         | (55.93, | (57.53, | (-0.01, | 0.348  | (231.54, | (233.55, | (-0.14, | 0.888  | (564.55, | (378.13, | (-1.77, | <0.001 | (8.44,  | (5.84, | (-1.72, | <0.001 |
|               | 64.84)  | 63.36)  | 0.03)   |        | 249.61)  | 245.19)  | 0.16)   |        | 592.28)  | 392.88)  | -1.00)  |        | 12.22)  | 7.83)  | -0.97)  |        |
|               | 20.31   | 19.88   | -0.07   |        | 118.83   | 125.69   | 0.21    |        | 436.14   | 168.21   | -3.20   |        | 7.57    | 2.93   | -3.20   |        |
| Honduras      | (17.27, | (18.00, | (-0.09, | <0.001 | (111.04, | (120.78, | (0.06,  | 0.008  | (421.49, | (162.58, | (-4.05, | <0.001 | (5.74,  | (2.23, | (-4.05, | <0.001 |
|               | 23.75)  | 21.91)  | -0.06)  |        | 127.03)  | 130.76)  | 0.37)   |        | 451.20)  | 173.99)  | -2.34)  |        | 9.83)   | 3.79)  | -2.34)  |        |
|               | 23.35   | 19.33   | -0.65   |        | 214.79   | 179.95   | -0.59   |        | 285.82   | 78.99    | -4.29   |        | 5.16    | 1.38   | -4.40   |        |
| Hungary       | (21.20, | (17.16, | (-0.68, | <0.001 | (208.42, | (173.39, | (-0.64, | <0.001 | (278.62, | (74.73,  | (-5.19, | <0.001 | (4.23,  | (0.87, | (-5.31, | <0.001 |
|               | 25.66)  | 21.73)  | -0.63)  |        | 221.32)  | 186.73)  | -0.54)  |        | 293.18)  | 83.47)   | -3.39)  |        | 6.24)   | 2.12)  | -3.48)  |        |
|               | 27.93   | 26.14   | -0.21   |        | 166.26   | 174.36   | 0.15    |        | 97.75    | 32.68    | -3.73   |        | 1.69    | 0.54   | -3.89   |        |
| Iceland       | (15.46, | (14.82, | (-0.25, | <0.001 | (132.93, | (142.86, | (0.12,  | <0.001 | (72.60,  | (19.91,  | (-3.96, | <0.001 | (0.03,  | (0.00, | (-4.20, | <0.001 |
|               | 46.78)  | 43.30)  | -0.18)  |        | 205.64)  | 211.25)  | 0.19)   |        | 129.04)  | 51.19)   | -3.50)  |        | 10.94)  | 8.52)  | -3.57)  |        |
|               | 21.48   | 21.89   | 0.06    |        | 134.69   | 140.93   | 0.16    |        | 579.65   | 425.43   | -1.11   |        | 9.87    | 7.33   | -1.08   |        |
| India         | (21.25, | (21.72, | (0.05,  | <0.001 | (134.10, | (140.49, | (0.12,  | <0.001 | (578.45, | (424.68, | (-1.75, | 0.001  | (9.72,  | (7.23, | (-1.73, | 0.001  |
|               | 21.71)  | 22.07)  | 0.08)   |        | 135.28)  | 141.37)  | 0.19)   |        | 580.84)  | 426.19)  | -0.47)  |        | 10.03)  | 7.43)  | -0.41)  |        |
|               | 7.45    | 8.18    | 0.36    |        | 83.09    | 95.92    | 0.53    |        | 514.25   | 367.70   | -1.10   |        | 8.92    | 6.38   | -1.10   |        |
| Indonesia     | (7.17,  | (7.94,  | (0.25,  | <0.001 | (82.12,  | (95.09,  | (0.41,  | <0.001 | (511.90, | (366.08, | (-1.40, | <0.001 | (8.61,  | (6.17, | (-1.39, | <0.001 |
|               | 7.74)   | 8.43)   | 0.46)   |        | 84.06)   | 96.75)   | 0.64)   |        | 516.61)  | 369.33)  | -0.81)  |        | 9.24)   | 6.60)  | -0.81)  |        |
| Iran (Islamic | 46.49   | 43.82   | -0.21   |        | 265.01   | 252.11   | -0.17   |        | 541.40   | 235.92   | -2.82   |        | 9.30    | 3.94   | -2.92   |        |
| Republic of)  | (45.12, | (42.90, | (-0.23, | <0.001 | (261.63, | (249.96, | (-0.19, | <0.001 | (536.75, | (233.68, | (-3.05, | <0.001 | (8.69,  | (3.66, | (-3.13, | <0.001 |

|            |         |         |         |        |          |          |         |        |          |          |         |        |        |        |         |        |
|------------|---------|---------|---------|--------|----------|----------|---------|--------|----------|----------|---------|--------|--------|--------|---------|--------|
|            | 47.90)  | 44.75)  | -0.19)  |        | 268.43)  | 254.27)  | -0.15)  |        | 546.08)  | 238.18)  | -2.59)  |        | 9.94)  | 4.24)  | -2.70)  |        |
|            | 35.24)  | 33.60)  | -0.16)  |        | 236.50)  | 229.16)  | -0.09)  |        | 610.86)  | 307.22)  | -2.40)  |        | 10.61) | 5.34)  | -2.40)  |        |
| Iraq       | (33.03, | (32.36, | (-0.18, | <0.001 | (230.61, | (225.81, | (-0.19, | 0.123  | (601.62, | (303.41, | (-2.85, | <0.001 | (9.42, | (4.84, | (-2.86, | <0.001 |
|            | 37.56)  | 34.89)  | -0.15)  |        | 242.50)  | 232.54)  | 0.02)   |        | 620.21)  | 311.07)  | -1.94)  |        | 11.92) | 5.87)  | -1.93)  |        |
|            | 28.05)  | 25.48)  | -0.31)  |        | 191.29)  | 190.68)  | 0.01)   |        | 80.48)   | 22.46)   | -4.30)  |        | 1.40)  | 0.37)  | -4.44)  |        |
| Ireland    | (24.16, | (22.11, | (-0.39, | <0.001 | (180.92, | (181.78, | (-0.06, | 0.736  | (73.82,  | (19.52,  | (-5.64, | <0.001 | (0.65, | (0.09, | (-5.79, | <0.001 |
|            | 32.39)  | 29.25)  | -0.22)  |        | 202.10)  | 199.93)  | 0.08)   |        | 87.59)   | 25.76)   | -2.94)  |        | 2.64)  | 1.10)  | -3.08)  |        |
|            | 21.63)  | 21.11)  | -0.04)  |        | 147.33)  | 161.79)  | 0.32)   |        | 100.28)  | 17.07)   | -5.88)  |        | 1.71)  | 0.27)  | -6.12)  |        |
| Israel     | (18.75, | (18.91, | (-0.13, | 0.371  | (139.71, | (155.67, | (0.26,  | <0.001 | (94.02,  | (15.12,  | (-6.57, | <0.001 | (0.98, | (0.08, | (-6.85, | <0.001 |
|            | 24.83)  | 23.50)  | 0.05)   |        | 155.26)  | 168.09)  | 0.38)   |        | 106.86)  | 19.21)   | -5.18)  |        | 2.77)  | 0.67)  | -5.38)  |        |
|            | 28.54)  | 28.51)  | 0.00)   |        | 202.13)  | 202.57)  | 0.02)   |        | 63.92)   | 25.24)   | -3.22)  |        | 1.08)  | 0.41)  | -3.40)  |        |
| Italy      | (27.54, | (27.35, | (-0.07, | 0.970  | (199.44, | (199.61, | (-0.05, | 0.587  | (62.41,  | (24.21,  | (-3.47, | <0.001 | (0.89, | (0.29, | (-3.61, | <0.001 |
|            | 29.57)  | 29.70)  | 0.07)   |        | 204.86)  | 205.56)  | 0.09)   |        | 65.46)   | 26.32)   | -2.96)  |        | 1.30)  | 0.58)  | -3.19)  |        |
|            | 53.55)  | 59.36)  | 0.37)   |        | 276.37)  | 313.04)  | 0.43)   |        | 114.19)  | 118.18)  | 0.60)   |        | 2.02)  | 2.08)  | 0.60)   |        |
| Jamaica    | (47.02, | (53.38, | (0.34,  | <0.001 | (260.65, | (298.97, | (0.40,  | <0.001 | (104.08, | (109.59, | (-0.57, | 0.320  | (0.88, | (1.08, | (-0.59, | 0.323  |
|            | 60.80)  | 65.85)  | 0.40)   |        | 292.83)  | 327.63)  | 0.46)   |        | 125.05)  | 127.29)  | 1.78)   |        | 4.00)  | 3.63)  | 1.81)   |        |
|            | 18.51)  | 17.94)  | -0.10)  |        | 126.97)  | 127.89)  | 0.03)   |        | 48.29)   | 28.52)   | -1.79)  |        | 0.80)  | 0.48)  | -1.75)  |        |
| Japan      | (17.94, | (17.30, | (-0.12, | <0.001 | (125.51, | (126.24, | (-0.00, | 0.079  | (47.39,  | (27.74,  | (-2.09, | <0.001 | (0.69, | (0.38, | (-2.11, | <0.001 |
|            | 19.09)  | 18.60)  | -0.08)  |        | 128.45)  | 129.57)  | 0.07)   |        | 49.21)   | 29.33)   | -1.49)  |        | 0.93)  | 0.59)  | -1.40)  |        |
|            | 33.15)  | 31.03)  | -0.23)  |        | 227.64)  | 215.32)  | -0.18)  |        | 230.97)  | 83.76)   | -3.36)  |        | 4.05)  | 1.42)  | -3.48)  |        |
| Jordan     | (28.47, | (28.71, | (-0.25, | <0.001 | (214.72, | (209.09, | (-0.21, | <0.001 | (218.14, | (79.91,  | (-4.10, | <0.001 | (2.50, | (0.95, | (-4.22, | <0.001 |
|            | 38.41)  | 33.48)  | -0.22)  |        | 241.16)  | 221.68)  | -0.15)  |        | 244.39)  | 87.75)   | -2.62)  |        | 6.24)  | 2.03)  | -2.73)  |        |
|            | 31.43)  | 28.54)  | -0.34)  |        | 202.84)  | 180.51)  | -0.40)  |        | 244.45)  | 131.30)  | -2.06)  |        | 4.26)  | 2.30)  | -2.04)  |        |
| Kazakhstan | (29.58, | (26.85, | (-0.36, | <0.001 | (198.08, | (176.28, | (-0.43, | <0.001 | (239.21, | (127.67, | (-2.69, | <0.001 | (3.59, | (1.85, | (-2.69, | <0.001 |
|            | 33.36)  | 30.32)  | -0.31)  |        | 207.69)  | 184.84)  | -0.38)  |        | 249.78)  | 135.02)  | -1.43)  |        | 5.02)  | 2.85)  | -1.39)  |        |
|            | 20.02)  | 20.03)  | -0.00)  |        | 102.05)  | 101.49)  | -0.03)  |        | 56.24)   | 96.80)   | 1.90)   |        | 0.92)  | 1.63)  | 2.01)   |        |
| Kenya      | (18.57, | (19.16, | (-0.04, | 0.836  | (98.58,  | (99.46,  | (-0.11, | 0.460  | (53.80,  | (94.87,  | (1.73,  | <0.001 | (0.63, | (1.39, | (1.83,  | <0.001 |
|            | 21.57)  | 20.94)  | 0.03)   |        | 105.62)  | 103.55)  | 0.05)   |        | 58.76)   | 98.76)   | 2.08)   |        | 1.31)  | 1.91)  | 2.18)   |        |
|            | 21.91)  | 22.74)  | 0.13)   |        | 159.43)  | 168.20)  | 0.20)   |        | 773.73)  | 715.63)  | -0.29)  |        | 13.77) | 12.69) | -0.30)  |        |
| Kiribati   | (4.74,  | (7.89,  | (0.12,  | <0.001 | (99.67,  | (120.11, | (0.11,  | <0.001 | (634.53, | (612.43, | (-0.44, | <0.001 | (1.53, | (2.64, | (-0.45, | <0.001 |
|            | 64.94)  | 51.58)  | 0.14)   |        | 242.85)  | 229.32)  | 0.29)   |        | 935.37)  | 831.47)  | -0.13)  |        | 53.07) | 37.32) | -0.14)  |        |
|            | 31.72)  | 31.65)  | -0.00)  |        | 229.92)  | 235.59)  | 0.09)   |        | 263.86)  | 82.50)   | -3.78)  |        | 4.48)  | 1.35)  | -3.89)  |        |
| Kuwait     | (26.13, | (28.48, | (-0.03, | 0.814  | (214.23, | (227.14, | (0.04,  | <0.001 | (247.16, | (77.13,  | (-4.99, | <0.001 | (2.55, | (0.75, | (-5.24, | <0.001 |

|              |         |         |         |        |          |          |         |        |          |          |         |        |        |        |         |        |
|--------------|---------|---------|---------|--------|----------|----------|---------|--------|----------|----------|---------|--------|--------|--------|---------|--------|
|              | 38.20)  | 35.20)  | 0.02)   |        | 246.49)  | 244.40)  | 0.14)   |        | 281.44)  | 88.25)   | -2.55)  |        | 7.37)  | 2.42)  | -2.53)  |        |
|              | 29.03)  | 27.02)  | -0.25)  |        | 182.33)  | 165.52)  | -0.33)  |        | 244.51)  | 134.33)  | -2.08)  |        | 4.26)  | 2.36)  | -2.05)  |        |
| Kyrgyzstan   | (25.54, | (24.30, | (-0.26, | <0.001 | (173.21, | (158.57, | (-0.35, | <0.001 | (234.03, | (128.05, | (-2.81, | <0.001 | (2.98, | (1.59, | (-2.78, | <0.001 |
|              | 32.88)  | 29.97)  | -0.23)  |        | 191.81)  | 172.70)  | -0.31)  |        | 255.36)  | 140.84)  | -1.35)  |        | 5.94)  | 3.37)  | -1.32)  |        |
| Lao People's | 18.58)  | 17.19)  | -0.27)  |        | 115.87)  | 106.03)  | -0.27)  |        | 352.04)  | 335.54)  | -0.13)  |        | 6.24)  | 5.84)  | -0.20)  |        |
| Democratic   | (15.52, | (15.16, | (-0.28, | <0.001 | (107.87, | (100.81, | (-0.46, | 0.005  | (338.09, | (326.30, | (-0.40, | 0.314  | (4.50, | (4.67, | (-0.44, | 0.112  |
| Republic     | 22.09)  | 19.43)  | -0.25)  |        | 124.33)  | 111.45)  | -0.09)  |        | 366.44)  | 344.98)  | 0.13)   |        | 8.46)  | 7.22)  | 0.05)   |        |
|              | 21.96)  | 23.01)  | 0.15)   |        | 176.82)  | 190.22)  | 0.26)   |        | 147.06)  | 48.07)   | -3.65)  |        | 2.64)  | 0.82)  | -3.84)  |        |
| Latvia       | (18.03, | (17.87, | (0.09,  | <0.001 | (165.45, | (175.39, | (0.18,  | <0.001 | (136.71, | (40.80,  | (-5.51, | <0.001 | (1.42, | (0.15, | (-5.89, | <0.001 |
|              | 26.54)  | 29.39)  | 0.21)   |        | 188.82)  | 206.19)  | 0.35)   |        | 158.04)  | 56.52)   | -1.76)  |        | 4.55)  | 3.04)  | -1.74)  |        |
|              | 29.68)  | 30.48)  | 0.09)   |        | 197.44)  | 210.02)  | 0.22)   |        | 536.01)  | 316.29)  | -1.79)  |        | 9.33)  | 5.41)  | -1.85)  |        |
| Lebanon      | (25.33, | (27.32, | (0.08,  | <0.001 | (185.85, | (201.73, | (0.16,  | <0.001 | (517.04, | (305.71, | (-1.93, | <0.001 | (6.97, | (4.12, | (-2.02, | <0.001 |
|              | 34.56)  | 33.95)  | 0.11)   |        | 209.57)  | 218.61)  | 0.28)   |        | 555.52)  | 327.20)  | -1.64)  |        | 12.25) | 7.05)  | -1.68)  |        |
|              | 22.58)  | 24.25)  | 0.25)   |        | 80.26)   | 89.88)   | 0.39)   |        | 60.48)   | 145.29)  | 2.92)   |        | 1.04)  | 2.55)  | 2.99)   |        |
| Lesotho      | (17.53, | (19.87, | (0.22,  | <0.001 | (70.15,  | (81.11,  | (0.36,  | <0.001 | (51.93,  | (134.16, | (2.34,  | <0.001 | (0.22, | (1.27, | (2.37,  | <0.001 |
|              | 28.71)  | 29.33)  | 0.27)   |        | 91.47)   | 99.34)   | 0.41)   |        | 70.10)   | 157.11)  | 3.51)   |        | 3.15)  | 4.59)  | 3.62)   |        |
|              | 22.13)  | 23.92)  | 0.26)   |        | 114.33)  | 121.38)  | 0.23)   |        | 169.68)  | 159.66)  | -0.23)  |        | 2.96)  | 2.79)  | -0.22)  |        |
| Liberia      | (17.38, | (20.87, | (0.22,  | <0.001 | (103.05, | (114.26, | (0.09,  | 0.002  | (156.04, | (151.59, | (-0.35, | 0.001  | (1.41, | (1.81, | (-0.36, | 0.002  |
|              | 27.81)  | 27.30)  | 0.30)   |        | 126.51)  | 128.84)  | 0.37)   |        | 184.21)  | 168.06)  | -0.09)  |        | 5.49)  | 4.12)  | -0.08)  |        |
|              | 28.06)  | 30.19)  | 0.25)   |        | 181.60)  | 203.79)  | 0.40)   |        | 678.33)  | 507.71)  | -0.96)  |        | 11.63) | 8.69)  | -0.93)  |        |
| Libya        | (23.93, | (27.50, | (0.21,  | <0.001 | (170.56, | (196.77, | (0.32,  | <0.001 | (657.89, | (496.41, | (-1.61, | 0.004  | (9.06, | (7.27, | (-1.67, | 0.015  |
|              | 32.73)  | 33.08)  | 0.29)   |        | 193.19)  | 211.00)  | 0.48)   |        | 699.28)  | 519.22)  | -0.31)  |        | 14.75) | 10.31) | -0.18)  |        |
|              | 24.13)  | 22.66)  | -0.24)  |        | 189.07)  | 178.30)  | -0.19)  |        | 142.87)  | 71.19)   | -2.27)  |        | 2.51)  | 1.24)  | -2.26)  |        |
| Lithuania    | (20.66, | (18.42, | (-0.30, | <0.001 | (179.11, | (166.13, | (-0.28, | <0.001 | (134.19, | (63.60,  | (-4.26, | 0.029  | (1.48, | (0.44, | (-4.36, | 0.039  |
|              | 28.04)  | 27.71)  | -0.17)  |        | 199.46)  | 191.23)  | -0.09)  |        | 151.98)  | 79.57)   | -0.23)  |        | 4.01)  | 3.00)  | -0.12)  |        |
|              | 19.92)  | 19.89)  | 0.01)   |        | 142.03)  | 160.77)  | 0.45)   |        | 85.51)   | 25.52)   | -4.07)  |        | 1.47)  | 0.42)  | -4.24)  |        |
| Luxembourg   | (11.25, | (12.44, | (-0.03, | 0.690  | (117.14, | (138.87, | (0.29,  | <0.001 | (66.25,  | (17.16,  | (-4.65, | <0.001 | (0.06, | (0.00, | (-4.85, | <0.001 |
|              | 33.89)  | 30.83)  | 0.04)   |        | 171.63)  | 185.74)  | 0.62)   |        | 109.63)  | 37.25)   | -3.50)  |        | 9.70)  | 5.57)  | -3.63)  |        |
|              | 19.44)  | 20.96)  | 0.25)   |        | 99.19)   | 107.50)  | 0.28)   |        | 187.52)  | 161.42)  | -0.48)  |        | 3.25)  | 2.81)  | -0.46)  |        |
| Madagascar   | (17.53, | (19.69, | (0.23,  | <0.001 | (94.68,  | (104.53, | (0.25,  | <0.001 | (181.47, | (157.84, | (-1.04, | 0.088  | (2.49, | (2.35, | (-1.02, | 0.105  |
|              | 21.51)  | 22.29)  | 0.28)   |        | 103.87)  | 110.53)  | 0.31)   |        | 193.73)  | 165.06)  | 0.07)   |        | 4.18)  | 3.34)  | 0.10)   |        |
|              | 22.96)  | 23.22)  | 0.04)   |        | 112.02)  | 112.92)  | 0.04)   |        | 226.97)  | 121.63)  | -2.08)  |        | 3.86)  | 2.05)  | -2.12)  |        |
| Malawi       | (20.65, | (21.62, | (0.01,  | 0.003  | (106.65, | (109.26, | (-0.03, | 0.266  | (219.64, | (117.99, | (-2.28, | <0.001 | (2.95, | (1.59, | (-2.32, | <0.001 |

|                   |         |         |         |        |          |          |         |        |          |          |         |        |         |        |         |        |
|-------------------|---------|---------|---------|--------|----------|----------|---------|--------|----------|----------|---------|--------|---------|--------|---------|--------|
|                   | 25.47)  | 24.90)  | 0.06)   |        | 117.60)  | 116.67)  | 0.12)   |        | 234.50)  | 125.35)  | -1.88)  |        | 4.99)   | 2.59)  | -1.91)  |        |
|                   | 19.22)  | 19.64)  | 0.08)   |        | 168.81)  | 174.56)  | 0.13)   |        | 130.12)  | 118.10)  | -0.37)  |        | 2.23)   | 2.01)  | -0.42)  |        |
| Malaysia          | (17.80, | (18.58, | (0.03,  | 0.002  | (164.48, | (171.36, | (0.04,  | 0.005  | (126.34, | (115.47, | (-0.77, | 0.068  | (1.76,  | (1.68, | (-0.81, | 0.037  |
|                   | 20.74)  | 20.74)  | 0.14)   |        | 173.23)  | 177.80)  | 0.22)   |        | 133.99)  | 120.77)  | 0.03)   |        | 2.79)   | 2.39)  | -0.03)  |        |
|                   | 17.89)  | 16.76)  | -0.22)  |        | 134.62)  | 125.06)  | -0.24)  |        | 426.99)  | 71.09)   | -6.02)  |        | 7.49)   | 1.20)  | -6.10)  |        |
| Maldives          | (6.29,  | (9.61,  | (-0.24, | <0.001 | (95.83,  | (104.07, | (-0.30, | <0.001 | (356.78, | (55.21,  | (-6.29, | <0.001 | (1.06,  | (0.05, | (-6.32, | <0.001 |
|                   | 41.95)  | 28.04)  | -0.21)  |        | 184.91)  | 149.75)  | -0.19)  |        | 508.08)  | 90.81)   | -5.75)  |        | 27.55)  | 7.62)  | -5.87)  |        |
|                   | 19.40)  | 20.14)  | 0.13)   |        | 89.99)   | 92.02)   | 0.09)   |        | 262.17)  | 201.25)  | -0.91)  |        | 4.60)   | 3.51)  | -0.93)  |        |
| Mali              | (17.17, | (18.69, | (0.12,  | <0.001 | (84.99,  | (88.78,  | (0.03,  | 0.003  | (253.74, | (196.58, | (-1.19, | <0.001 | (3.54,  | (2.91, | (-1.22, | <0.001 |
|                   | 21.84)  | 21.68)  | 0.14)   |        | 95.21)   | 95.35)   | 0.14)   |        | 270.83)  | 206.01)  | -0.63)  |        | 5.90)   | 4.20)  | -0.64)  |        |
|                   | 17.52)  | 16.66)  | -0.17)  |        | 140.77)  | 147.38)  | 0.20)   |        | 124.71)  | 57.58)   | -2.59)  |        | 2.14)   | 0.97)  | -2.65)  |        |
| Malta             | (9.09,  | (8.52,  | (-0.23, | <0.001 | (115.06, | (121.37, | (-0.05, | 0.123  | (100.28, | (41.46,  | (-2.96, | <0.001 | (0.17,  | (0.01, | (-3.25, | <0.001 |
|                   | 31.04)  | 30.62)  | -0.12)  |        | 171.01)  | 178.38)  | 0.45)   |        | 153.75)  | 79.00)   | -2.22)  |        | 9.98)   | 9.43)  | -2.04)  |        |
|                   | 19.45)  | 19.95)  | 0.09)   |        | 148.39)  | 155.58)  | 0.17)   |        | 389.89)  | 656.32)  | 1.78)   |        | 6.95)   | 11.71) | 1.78)   |        |
| Marshall Islands  | (1.27,  | (2.92,  | (0.07,  | <0.001 | (72.50,  | (91.87,  | (0.13,  | <0.001 | (258.18, | (516.11, | (1.55,  | <0.001 | (0.01,  | (0.65, | (1.53,  | <0.001 |
|                   | 90.50)  | 67.87)  | 0.10)   |        | 271.49)  | 247.04)  | 0.20)   |        | 566.86)  | 823.26)  | 2.01)   |        | 69.94)  | 54.65) | 2.03)   |        |
|                   | 21.76)  | 22.74)  | 0.14)   |        | 116.44)  | 118.84)  | 0.08)   |        | 178.73)  | 109.61)  | -1.65)  |        | 3.13)   | 1.89)  | -1.73)  |        |
| Mauritania        | (17.15, | (19.42, | (0.13,  | <0.001 | (105.16, | (110.86, | (0.03,  | 0.002  | (164.90, | (102.11, | (-1.80, | <0.001 | (1.54,  | (1.02, | (-1.93, | <0.001 |
|                   | 27.27)  | 26.50)  | 0.16)   |        | 128.63)  | 127.25)  | 0.13)   |        | 193.45)  | 117.53)  | -1.50)  |        | 5.70)   | 3.23)  | -1.52)  |        |
|                   | 18.50)  | 17.27)  | -0.21)  |        | 145.05)  | 132.64)  | -0.30)  |        | 321.05)  | 122.20)  | -3.29)  |        | 5.65)   | 2.11)  | -3.40)  |        |
| Mauritius         | (13.50, | (12.41, | (-0.30, | <0.001 | (130.27, | (118.56, | (-0.34, | <0.001 | (298.82, | (108.65, | (-3.93, | <0.001 | (3.06,  | (0.70, | (-4.11, | <0.001 |
|                   | 24.77)  | 23.47)  | -0.13)  |        | 161.09)  | 148.00)  | -0.25)  |        | 344.52)  | 137.05)  | -2.65)  |        | 9.59)   | 5.00)  | -2.68)  |        |
|                   | 23.45)  | 19.70)  | -0.60)  |        | 165.38)  | 139.83)  | -0.58)  |        | 162.07)  | 130.35)  | -0.66)  |        | 2.78)   | 2.22)  | -0.68)  |        |
| Mexico            | (22.71, | (19.16, | (-0.61, | <0.001 | (163.33, | (138.38, | (-0.63, | <0.001 | (160.09, | (128.96, | (-1.39, | 0.079  | (2.52,  | (2.04, | (-1.38, | 0.056  |
|                   | 24.22)  | 20.25)  | -0.58)  |        | 167.45)  | 141.28)  | -0.52)  |        | 164.07)  | 131.76)  | 0.08)   |        | 3.05)   | 2.41)  | 0.02)   |        |
| Micronesia        | 20.36)  | 19.21)  | -0.20)  |        | 155.87)  | 146.89)  | -0.20)  |        | 486.19)  | 603.49)  | 0.73)   |        | 8.68)   | 10.65) | 0.70)   |        |
| (Federated States | (4.90,  | (4.69,  | (-0.23, | <0.001 | (101.50, | (96.15,  | (-0.25, | <0.001 | (385.97, | (495.78, | (0.63,  | <0.001 | (0.56,  | (1.21, | (0.61,  | <0.001 |
| of)               | 57.15)  | 52.95)  | -0.17)  |        | 229.76)  | 215.32)  | -0.16)  |        | 605.24)  | 728.13)  | 0.84)   |        | 39.73)  | 40.26) | 0.79)   |        |
|                   | 24.55)  | 23.42)  | -0.13)  |        | 158.74)  | 167.41)  | 0.19)   |        | 72.38)   | 40.13)   | -2.02)  |        | 1.23)   | 0.68)  | -2.02)  |        |
| Monaco            | (1.04,  | (0.78,  | (-0.18, | <0.001 | (69.60,  | (74.98,  | (0.15,  | <0.001 | (18.00,  | (4.99,   | (-2.12, | <0.001 | (0.00,  | (0.00, | (-2.25, | <0.001 |
|                   | 161.58) | 132.05) | -0.09)  |        | 339.50)  | 331.73)  | 0.23)   |        | 227.67)  | 156.15)  | -1.91)  |        | 127.68) | 92.32) | -1.79)  |        |
|                   | 32.00)  | 31.93)  | -0.01)  |        | 195.98)  | 197.44)  | 0.05)   |        | 812.72)  | 401.65)  | -2.48)  |        | 14.22)  | 7.02)  | -2.49)  |        |
| Mongolia          | (26.58, | (27.95, | (-0.04, | 0.627  | (181.48, | (187.53, | (-0.06, | 0.344  | (783.73, | (387.19, | (-3.19, | <0.001 | (10.58, | (5.23, | (-3.21, | <0.001 |

|             |         |         |         |        |          |          |         |        |          |          |         |        |         |         |         |        |
|-------------|---------|---------|---------|--------|----------|----------|---------|--------|----------|----------|---------|--------|---------|---------|---------|--------|
|             | 38.32)  | 36.39)  | 0.02)   |        | 211.40)  | 207.82)  | 0.16)   |        | 842.58)  | 416.58)  | -1.76)  |        | 18.80)  | 9.31)   | -1.77)  |        |
|             | 19.78   | 18.38   | -0.26   |        | 180.52   | 170.96   | -0.17   |        | 100.87   | 77.15    | -0.81   |        | 1.72    | 1.32    | -0.80   |        |
| Montenegro  | (12.70, | (11.17, | (-0.27, | <0.001 | (157.58, | (147.64, | (-0.21, | <0.001 | (83.91,  | (61.78,  | (-1.86, | 0.136  | (0.23,  | (0.09,  | (-1.87, | 0.146  |
|             | 29.43)  | 28.77)  | -0.24)  |        | 205.90)  | 197.18)  | -0.13)  |        | 120.31)  | 95.47)   | 0.25)   |        | 6.12)   | 6.29)   | 0.28)   |        |
|             | 32.25   | 30.91   | -0.15   |        | 213.57   | 207.98   | -0.08   |        | 601.99   | 411.19   | -1.26   |        | 10.45   | 7.14    | -1.26   |        |
| Morocco     | (30.64, | (29.66, | (-0.16, | <0.001 | (209.31, | (204.72, | (-0.14, | 0.024  | (594.98, | (406.58, | (-1.49, | <0.001 | (9.54,  | (6.54,  | (-1.49, | <0.001 |
|             | 33.93)  | 32.20)  | -0.14)  |        | 217.90)  | 211.28)  | -0.01)  |        | 609.07)  | 415.84)  | -1.03)  |        | 11.43)  | 7.77)   | -1.03)  |        |
|             | 23.29   | 23.90   | 0.08    |        | 111.29   | 115.06   | 0.14    |        | 117.01   | 114.18   | -0.14   |        | 2.00    | 1.94    | -0.09   |        |
| Mozambique  | (21.34, | (22.56, | (0.06,  | <0.001 | (106.91, | (112.00, | (0.04,  | 0.005  | (112.61, | (111.24, | (-0.37, | 0.236  | (1.46,  | (1.57,  | (-0.33, | 0.490  |
|             | 25.38)  | 25.30)  | 0.10)   |        | 115.81)  | 118.19)  | 0.23)   |        | 121.54)  | 117.18)  | 0.09)   |        | 2.68)   | 2.38)   | 0.16)   |        |
|             | 19.53   | 17.90   | -0.30   |        | 120.95   | 109.34   | -0.31   |        | 891.38   | 246.16   | -4.43   |        | 15.50   | 4.16    | -4.52   |        |
| Myanmar     | (18.56, | (17.13, | (-0.32, | <0.001 | (118.48, | (107.42, | (-0.50, | 0.001  | (884.77, | (243.28, | (-4.77, | <0.001 | (14.63, | (3.79,  | (-4.88, | <0.001 |
|             | 20.53)  | 18.69)  | -0.28)  |        | 123.46)  | 111.27)  | -0.13)  |        | 898.02)  | 249.06)  | -4.08)  |        | 16.40)  | 4.55)   | -4.16)  |        |
|             | 25.02   | 23.16   | -0.27   |        | 107.01   | 99.98    | -0.26   |        | 94.22    | 68.16    | -1.02   |        | 1.65    | 1.17    | -1.08   |        |
| Namibia     | (19.11, | (19.11, | (-0.31, | <0.001 | (93.91,  | (91.20,  | (-0.39, | <0.001 | (82.09,  | (61.00,  | (-1.55, | <0.001 | (0.42,  | (0.41,  | (-1.66, | <0.001 |
|             | 32.30)  | 27.84)  | -0.24)  |        | 121.49)  | 109.39)  | -0.12)  |        | 107.72)  | 75.94)   | -0.49)  |        | 4.48)   | 2.65)   | -0.49)  |        |
|             | 20.38   | 20.89   | 0.09    |        | 160.98   | 164.96   | 0.10    |        | 663.63   | 950.69   | 1.23    |        | 11.83   | 16.83   | 1.21    |        |
| Nauru       | (0.00,  | (0.01,  | (0.06,  | <0.001 | (33.16,  | (39.09,  | (0.05,  | <0.001 | (347.63, | (581.17, | (0.92,  | <0.001 | (0.00,  | (0.00,  | (0.89,  | <0.001 |
|             | 246.24) | 225.57) | 0.11)   |        | 476.11)  | 457.27)  | 0.14)   |        | 1152.64) | 1471.80) | 1.55)   |        | 230.52) | 218.43) | 1.53)   |        |
|             | 20.42   | 18.79   | -0.28   |        | 133.83   | 122.20   | -0.31   |        | 389.58   | 200.85   | -2.25   |        | 6.83    | 3.50    | -2.27   |        |
| Nepal       | (18.92, | (17.76, | (-0.31, | <0.001 | (129.85, | (119.52, | (-0.34, | <0.001 | (382.90, | (197.45, | (-2.50, | <0.001 | (5.97,  | (3.06,  | (-2.53, | <0.001 |
|             | 22.00)  | 19.86)  | -0.26)  |        | 137.90)  | 124.93)  | -0.28)  |        | 396.36)  | 204.30)  | -1.99)  |        | 7.79)   | 3.98)   | -2.00)  |        |
|             | 39.44   | 35.18   | -0.38   |        | 217.31   | 227.91   | 0.15    |        | 83.21    | 26.29    | -3.80   |        | 1.44    | 0.44    | -3.93   |        |
| Netherlands | (37.25, | (32.96, | (-0.39, | <0.001 | (212.14, | (222.29, | (0.09,  | <0.001 | (80.02,  | (24.40,  | (-4.80, | <0.001 | (1.05,  | (0.23,  | (-4.96, | <0.001 |
|             | 41.74)  | 37.51)  | -0.36)  |        | 222.58)  | 233.65)  | 0.21)   |        | 86.51)   | 28.29)   | -2.79)  |        | 1.94)   | 0.78)   | -2.89)  |        |
|             | 27.09   | 20.58   | -0.93   |        | 154.52   | 134.63   | -0.47   |        | 83.98    | 32.34    | -3.18   |        | 1.47    | 0.56    | -3.17   |        |
| New Zealand | (23.38, | (17.43, | (-0.98, | <0.001 | (145.47, | (126.45, | (-0.54, | <0.001 | (77.34,  | (28.40,  | (-3.79, | <0.001 | (0.71,  | (0.16,  | (-4.38, | <0.001 |
|             | 31.24)  | 24.16)  | -0.88)  |        | 164.00)  | 143.23)  | -0.39)  |        | 91.04)   | 36.68)   | -2.57)  |        | 2.69)   | 1.45)   | -1.93)  |        |
|             | 19.93   | 19.05   | -0.15   |        | 131.80   | 135.60   | 0.09    |        | 208.03   | 141.60   | -1.40   |        | 3.60    | 2.42    | -1.44   |        |
| Nicaragua   | (16.68, | (16.81, | (-0.17, | <0.001 | (122.84, | (129.47, | (0.07,  | <0.001 | (197.02, | (135.37, | (-2.58, | 0.023  | (2.27,  | (1.67,  | (-2.64, | 0.019  |
|             | 23.68)  | 21.50)  | -0.13)  |        | 141.25)  | 141.96)  | 0.11)   |        | 219.51)  | 148.06)  | -0.20)  |        | 5.45)   | 3.40)   | -0.23)  |        |
|             | 19.26   | 20.34   | 0.18    |        | 96.52    | 99.92    | 0.13    |        | 145.65   | 127.61   | -0.43   |        | 2.53    | 2.21    | -0.45   |        |
| Niger       | (16.88, | (18.82, | (0.14,  | <0.001 | (90.88,  | (96.39,  | (0.08,  | <0.001 | (138.91, | (123.74, | (-0.73, | 0.005  | (1.70,  | (1.72,  | (-0.72, | 0.001  |



|                          |          |          |         |        |          |          |         |        |          |          |         |        |          |          |         |        |
|--------------------------|----------|----------|---------|--------|----------|----------|---------|--------|----------|----------|---------|--------|----------|----------|---------|--------|
|                          | 21.91)   | 21.96)   | 0.22)   |        | 102.43)  | 103.56)  | 0.18)   |        | 152.66)  | 131.56)  | -0.13)  |        | 3.64)    | 2.80)    | -0.19)  |        |
|                          | 17.68)   | 19.58)   | 0.34)   |        | 86.10)   | 96.66)   | 0.41)   |        | 126.98)  | 92.43)   | -1.05)  |        | 2.21)    | 1.60)    | -1.07)  |        |
| Nigeria                  | (16.99,  | (19.14,  | (0.26,  | <0.001 | (84.52,  | (95.64,  | (0.39,  | <0.001 | (125.11, | (91.46,  | (-1.51, | <0.001 | (1.97,   | (1.47,   | (-1.54, | <0.001 |
|                          | 18.39)   | 20.04)   | 0.42)   |        | 87.71)   | 97.68)   | 0.43)   |        | 128.87)  | 93.41)   | -0.60)  |        | 2.47)    | 1.73)    | -0.61)  |        |
|                          | 19.83)   | 20.11)   | 0.05)   |        | 177.81)  | 184.00)  | 0.12)   |        | 291.94)  | 322.71)  | 0.35)   |        | 5.12)    | 5.61)    | 0.31)   |        |
| Niue                     | (0.00,   | (0.00,   | (0.04,  | <0.001 | (0.74,   | (0.19,   | (0.11,  | <0.001 | (8.68,   | (5.19,   | (0.05,  | 0.021  | (0.00,   | (0.00,   | (0.03,  | 0.032  |
|                          | 1080.30) | 1501.26) | 0.06)   |        | 1382.69) | 1807.72) | 0.12)   |        | 1582.74) | 2053.46) | 0.64)   |        | 1050.39) | 1472.62) | 0.60)   |        |
|                          | )        | )        | )       |        | )        | )        | )       |        | )        | )        | )       |        | )        | )        | )       |        |
|                          | 17.35)   | 16.17)   | -0.25)  |        | 149.51)  | 143.06)  | -0.15)  |        | 307.98)  | 153.00)  | -2.34)  |        | 5.30)    | 2.62)    | -2.35)  |        |
| North Macedonia          | (13.51,  | (12.46,  | (-0.27, | <0.001 | (137.81, | (131.82, | (-0.17, | <0.001 | (291.04, | (141.11, | (-3.36, | <0.001 | (3.29,   | (1.29,   | (-3.34, | <0.001 |
|                          | 21.95)   | 20.81)   | -0.23)  |        | 161.96)  | 155.15)  | -0.12)  |        | 325.67)  | 165.75)  | -1.31)  |        | 8.10)    | 4.96)    | -1.34)  |        |
|                          | 17.86)   | 19.28)   | 0.27)   |        | 160.73)  | 179.08)  | 0.37)   |        | 186.80)  | 181.58)  | -0.03)  |        | 3.25)    | 3.15)    | -0.04)  |        |
| Northern Mariana Islands | (2.31,   | (0.33,   | (0.23,  | <0.001 | (95.91,  | (75.20,  | (0.36,  | <0.001 | (116.53, | (77.20,  | (-0.20, | 0.757  | (0.00,   | (0.00,   | (-0.21, | 0.640  |
|                          | 66.65)   | 131.50)  | 0.32)   |        | 254.71)  | 364.80)  | 0.38)   |        | 285.90)  | 367.38)  | 0.14)   |        | 42.95)   | 104.64)  | 0.13)   |        |
|                          | 26.94)   | 24.60)   | -0.30)  |        | 177.27)  | 174.95)  | -0.04)  |        | 74.85)   | 16.53)   | -5.16)  |        | 1.30)    | 0.26)    | -5.49)  |        |
| Norway                   | (23.45,  | (21.45,  | (-0.35, | <0.001 | (168.21, | (166.50, | (-0.07, | 0.038  | (69.00,  | (14.00,  | (-5.70, | <0.001 | (0.64,   | (0.04,   | (-6.35, | <0.001 |
|                          | 30.81)   | 28.12)   | -0.25)  |        | 186.72)  | 183.75)  | -0.00)  |        | 81.08)   | 19.41)   | -4.62)  |        | 2.38)    | 0.93)    | -4.63)  |        |
|                          | 30.19)   | 33.00)   | 0.30)   |        | 201.63)  | 231.28)  | 0.49)   |        | 478.54)  | 256.77)  | -1.99)  |        | 8.30)    | 4.32)    | -2.12)  |        |
| Oman                     | (23.92,  | (29.23,  | (0.25,  | <0.001 | (184.61, | (221.16, | (0.44,  | <0.001 | (452.58, | (245.74, | (-2.26, | <0.001 | (5.19,   | (3.01,   | (-2.39, | <0.001 |
|                          | 37.67)   | 37.20)   | 0.36)   |        | 219.83)  | 241.80)  | 0.53)   |        | 505.65)  | 268.22)  | -1.73)  |        | 12.66)   | 6.09)    | -1.86)  |        |
|                          | 24.63)   | 25.51)   | 0.12)   |        | 165.15)  | 172.09)  | 0.15)   |        | 535.69)  | 689.01)  | 0.89)   |        | 9.52)    | 12.19)   | 0.87)   |        |
| Pakistan                 | (23.88,  | (25.01,  | (0.11,  | <0.001 | (163.13, | (170.78, | (0.12,  | <0.001 | (532.10, | (686.42, | (0.74,  | <0.001 | (9.04,   | (11.84,  | (0.73,  | <0.001 |
|                          | 25.41)   | 26.01)   | 0.13)   |        | 167.18)  | 173.41)  | 0.18)   |        | 539.31)  | 691.60)  | 1.03)   |        | 10.02)   | 12.54)   | 1.02)   |        |
|                          | 19.85)   | 20.13)   | 0.05)   |        | 170.50)  | 177.02)  | 0.13)   |        | 382.07)  | 376.99)  | -0.05)  |        | 6.73)    | 6.60)    | -0.07)  |        |
| Palau                    | (0.08,   | (0.03,   | (0.04,  | <0.001 | (58.64,  | (55.85,  | (0.11,  | <0.001 | (199.08, | (180.73, | (-0.12, | 0.195  | (0.00,   | (0.00,   | (-0.14, | 0.040  |
|                          | 158.16)  | 205.85)  | 0.07)   |        | 387.87)  | 438.96)  | 0.15)   |        | 666.08)  | 708.15)  | 0.02)   |        | 134.11)  | 181.94)  | -0.00)  |        |
|                          | 31.49)   | 31.28)   | -0.03)  |        | 216.81)  | 219.55)  | 0.05)   |        | 322.17)  | 191.98)  | -1.76)  |        | 5.58)    | 3.27)    | -1.81)  |        |
| Palestine                | (25.40,  | (27.74,  | (-0.04, | 0.001  | (199.84, | (209.78, | (0.03,  | <0.001 | (302.04, | (183.09, | (-1.89, | <0.001 | (3.20,   | (2.19,   | (-1.94, | <0.001 |
|                          | 38.68)   | 35.18)   | -0.01)  |        | 234.90)  | 229.66)  | 0.07)   |        | 343.38)  | 201.21)  | -1.63)  |        | 9.14)    | 4.71)    | -1.69)  |        |
|                          | 18.34)   | 17.65)   | -0.12)  |        | 118.46)  | 123.94)  | 0.15)   |        | 132.62)  | 67.16)   | -2.34)  |        | 2.28)    | 1.13)    | -2.39)  |        |
| Panama                   | (14.65,  | (14.83,  | (-0.16, | <0.001 | (108.47, | (116.24, | (0.13,  | <0.001 | (122.22, | (61.53,  | (-3.62, | <0.001 | (1.10,   | (0.51,   | (-3.79, | 0.001  |
|                          | 22.72)   | 20.85)   | -0.08)  |        | 129.14)  | 132.03)  | 0.17)   |        | 143.69)  | 73.17)   | -1.03)  |        | 4.22)    | 2.17)    | -0.96)  |        |
| Papua New Guinea         | 20.51)   | 21.00)   | 0.09)   | <0.001 | 155.75)  | 162.68)  | 0.17)   | <0.001 | 214.36)  | 291.33)  | 1.04)   | <0.001 | 3.76)    | 5.11)    | 1.04)   | <0.001 |

|                        |         |         |         |        |          |          |         |        |          |          |          |        |        |        |          |        |
|------------------------|---------|---------|---------|--------|----------|----------|---------|--------|----------|----------|----------|--------|--------|--------|----------|--------|
|                        | (17.30, | (19.00, | (0.07,  |        | (146.43, | (156.96, | (0.09,  |        | (203.49, | (283.69, | (0.78,   | (2.44, | (4.14, | (0.78, |          |        |
|                        | 24.16)  | 23.15)  | 0.10)   |        | 165.52)  | 168.56)  | 0.24)   |        | 225.68)  | 299.11)  | 1.30)    | 5.56)  | 6.24)  | 1.31)  |          |        |
|                        | 12.24   | 12.41   | 0.06    |        | 89.26    | 97.68    | 0.31    |        | 191.41   | 103.92   | -1.95    | 3.37   | 1.81   | -2.02  |          |        |
| Paraguay               | (9.83,  | (10.66, | (0.02,  | 0.003  | (82.33,  | (92.60,  | (0.29,  | <0.001 | (181.26, | (98.68,  | (-2.67,  | <0.001 | (2.14, | (1.18, | (-3.06,  | <0.001 |
|                        | 15.08)  | 14.36)  | 0.10)   |        | 96.63)   | 102.97)  | 0.34)   |        | 202.01)  | 109.37)  | -1.21)   |        | 5.07)  | 2.66)  | (-0.96)  |        |
|                        | 7.19    | 6.98    | -0.11   |        | 62.49    | 62.20    | -0.02   |        | 266.32   | 96.25    | -3.34    |        | 4.55   | 1.59   | -3.45    |        |
| Peru                   | (6.40,  | (6.36,  | (-0.14, | <0.001 | (60.01,  | (60.36,  | (-0.04, | 0.084  | (261.34, | (93.94,  | (-4.80,  | <0.001 | (3.91, | (1.31, | (-4.98,  | <0.001 |
|                        | 8.07)   | 7.63)   | (-0.07) |        | 65.05)   | 64.09)   | 0.00)   |        | 271.38)  | 98.61)   | (-1.86)  |        | 5.26)  | 1.92)  | (-1.90)  |        |
|                        | 33.80   | 36.69   | 0.28    |        | 176.69   | 206.90   | 0.55    |        | 123.46   | 417.92   | 4.42     |        | 2.12   | 7.23   | 4.45     |        |
| Philippines            | (32.74, | (35.88, | (0.25,  | <0.001 | (174.21, | (204.96, | (0.51,  | <0.001 | (121.42, | (415.19, | (3.85,   | <0.001 | (1.86, | (6.88, | (3.88,   | <0.001 |
|                        | 34.88)  | 37.50)  | 0.32)   |        | 179.21)  | 208.86)  | 0.57)   |        | 125.53)  | 420.66)  | 4.99)    |        | 2.41)  | 7.61)  | 5.03)    |        |
|                        | 10.31   | 9.70    | -0.21   |        | 126.90   | 133.42   | 0.20    |        | 164.24   | 31.73    | -5.67    |        | 2.91   | 0.51   | -6.02    |        |
| Poland                 | (9.60,  | (8.96,  | (-0.24, | <0.001 | (124.45, | (130.78, | (0.08,  | 0.001  | (161.47, | (30.46,  | (-6.65,  | <0.001 | (2.56, | (0.36, | (-7.38,  | <0.001 |
|                        | 11.07)  | 10.50)  | (-0.18) |        | 129.40)  | 136.11)  | 0.32)   |        | 167.05)  | 33.06)   | (-4.68)  |        | 3.31)  | 0.71)  | (-4.63)  |        |
|                        | 10.94   | 10.22   | -0.23   |        | 112.33   | 143.60   | 0.91    |        | 102.08   | 23.33    | -4.95    |        | 1.77   | 0.39   | -5.05    |        |
| Portugal               | (9.50,  | (8.69,  | (-0.30, | <0.001 | (107.61, | (137.96, | (0.68,  | <0.001 | (97.58,  | (21.12,  | (-5.64,  | <0.001 | (1.23, | (0.16, | (-5.79,  | <0.001 |
|                        | 12.54)  | 11.97)  | (-0.15) |        | 117.20)  | 149.43)  | 1.15)   |        | 106.73)  | 25.72)   | (-4.26)  |        | 2.48)  | 0.85)  | (-4.30)  |        |
|                        | 56.38   | 57.16   | 0.05    |        | 315.42   | 319.49   | 0.04    |        | 141.09   | 53.97    | -4.01    |        | 2.41   | 0.90   | -4.15    |        |
| Puerto Rico            | (51.04, | (51.22, | (0.02,  | <0.001 | (302.59, | (305.42, | (0.02,  | <0.001 | (132.56, | (48.28,  | (-4.30,  | <0.001 | (1.42, | (0.31, | (-4.46,  | <0.001 |
|                        | 62.13)  | 63.63)  | 0.08)   |        | 328.66)  | 334.08)  | 0.06)   |        | 150.02)  | 60.18)   | (-3.71)  |        | 3.84)  | 2.08)  | (-3.84)  |        |
|                        | 28.29   | 26.01   | -0.29   |        | 187.35   | 173.41   | -0.27   |        | 294.49   | 83.17    | -4.07    |        | 5.06   | 1.36   | -4.22    |        |
| Qatar                  | (17.24, | (21.25, | (-0.31, | <0.001 | (157.10, | (161.28, | (-0.31, | <0.001 | (255.50, | (73.88,  | (-5.58,  | <0.001 | (1.24, | (0.44, | (-5.74,  | <0.001 |
|                        | 44.51)  | 31.86)  | (-0.28) |        | 222.35)  | 186.54)  | (-0.24) |        | 338.29)  | 93.58)   | (-2.53)  |        | 14.75) | 3.74)  | (-2.68)  |        |
|                        | 13.65   | 12.90   | -0.20   |        | 97.16    | 105.24   | 0.31    |        | 340.40   | 19.32    | -9.50    |        | 5.66   | 0.31   | -9.61    |        |
| Republic of Korea      | (12.95, | (12.14, | (-0.23, | <0.001 | (95.23,  | (103.14, | (0.03,  | 0.028  | (336.82, | (18.41,  | (-10.10, | <0.001 | (5.20, | (0.21, | (-10.29, | <0.001 |
|                        | 14.38)  | 13.69)  | (-0.17) |        | 99.13)   | 107.38)  | 0.58)   |        | 344.02)  | 20.27)   | (-8.91)  |        | 6.14)  | 0.46)  | (-8.93)  |        |
|                        | 24.88   | 26.53   | 0.21    |        | 171.42   | 185.40   | 0.27    |        | 169.53   | 93.95    | -1.79    |        | 2.96   | 1.64   | -1.76    |        |
| Republic of<br>Moldova | (21.78, | (22.84, | (0.17,  | <0.001 | (163.29, | (175.84, | (0.25,  | <0.001 | (161.33, | (87.11,  | (-3.09,  | 0.008  | (1.97, | (0.86, | (-3.06,  | 0.009  |
|                        | 28.33)  | 30.75)  | 0.24)   |        | 179.88)  | 195.44)  | 0.30)   |        | 178.07)  | 101.29)  | (-0.48)  |        | 4.32)  | 3.02)  | (-0.44)  |        |
|                        | 16.06   | 16.73   | 0.13    |        | 149.51   | 152.97   | 0.10    |        | 181.98   | 103.36   | -1.77    |        | 3.19   | 1.79   | -1.82    |        |
| Romania                | (14.87, | (15.27, | (0.10,  | <0.001 | (145.92, | (148.64, | (-0.04, | 0.150  | (178.01, | (99.78,  | (-2.46,  | <0.001 | (2.68, | (1.35, | (-2.50,  | <0.001 |
|                        | 17.32)  | 18.31)  | 0.16)   |        | 153.18)  | 157.40)  | 0.24)   |        | 186.03)  | 107.05)  | (-1.07)  |        | 3.77)  | 2.34)  | (-1.14)  |        |
| Russian Federation     | 27.89   | 29.99   | 0.23    | <0.001 | 180.45   | 201.98   | 0.43    | <0.001 | 161.88   | 161.95   | 0.13     | 0.845  | 2.86   | 2.86   | 0.14     | 0.837  |

|                                  |         |         |         |        |          |          |         |        |          |          |         |        |        |         |         |        |
|----------------------------------|---------|---------|---------|--------|----------|----------|---------|--------|----------|----------|---------|--------|--------|---------|---------|--------|
|                                  | (27.30, | (29.32, | (0.19,  |        | (178.99, | (200.33, | (0.29,  |        | (160.49, | (160.48, | (-1.15, | (2.68, | (2.67, | (-1.16, |         |        |
|                                  | 28.49)  | 30.67)  | 0.28)   |        | 181.92)  | 203.63)  | 0.57)   |        | 163.29)  | 163.44)  | 1.42)   | 3.06)  | 3.07)  | 1.45)   |         |        |
|                                  | 18.02   | 17.63   | -0.08   |        | 84.54    | 81.43    | -0.14   |        | 151.33   | 83.30    | -2.09   | 2.58   | 1.39   | -2.17   |         |        |
| Rwanda                           | (15.72, | (16.03, | (-0.11, | <0.001 | (79.34,  | (77.90,  | (-0.21, | <0.001 | (144.56, | (79.84,  | (-2.34, | <0.001 | (1.76, | (0.97,  | (-2.41, | <0.001 |
|                                  | 20.58)  | 19.35)  | -0.05)  |        | 90.01)   | 85.08)   | -0.08)  |        | 158.34)  | 86.88)   | -1.84)  | 3.67)  | 1.93)  | -1.92)  |         |        |
| Saint Kitts and Nevis            | 55.79   | 56.18   | 0.03    |        | 280.64   | 283.58   | 0.04    |        | 372.13   | 45.58    | -7.04   | 6.59   | 0.74   | -7.32   |         |        |
|                                  | (17.12, | (21.85, | (0.00,  | 0.024  | (176.66, | (196.64, | (0.03,  | <0.001 | (251.03, | (15.56,  | (-7.44, | <0.001 | (0.01, | (0.00,  | (-7.90, | <0.001 |
|                                  | 137.65) | 120.66) | 0.06)   |        | 425.12)  | 398.03)  | 0.05)   |        | 533.12)  | 106.14)  | -6.63)  | 62.82) | 37.72) | -6.73)  |         |        |
| Saint Lucia                      | 58.94   | 58.54   | -0.02   |        | 312.06   | 308.64   | -0.04   |        | 136.62   | 51.36    | -3.34   | 2.39   | 0.86   | -3.50   |         |        |
|                                  | (32.94, | (35.84, | (-0.04, | 0.067  | (244.48, | (253.34, | (-0.05, | <0.001 | (93.50,  | (30.46,  | (-3.78, | <0.001 | (0.00, | (0.00,  | (-3.96, | <0.001 |
|                                  | 98.88)  | 90.88)  | 0.00)   |        | 393.32)  | 373.01)  | -0.03)  |        | 193.70)  | 81.87)   | -2.89)  | 22.48) | 13.81) | -3.04)  |         |        |
| Saint Vincent and the Grenadines | 56.98   | 56.57   | -0.02   |        | 277.44   | 275.62   | -0.02   |        | 297.07   | 158.40   | -2.14   | 5.18   | 2.75   | -2.16   |         |        |
|                                  | (28.66, | (28.99, | (-0.04, | 0.122  | (205.87, | (209.32, | (-0.04, | 0.322  | (224.17, | (109.21, | (-2.80, | <0.001 | (0.11, | (0.01,  | (-2.83, | <0.001 |
|                                  | 103.79) | 99.64)  | 0.01)   |        | 367.04)  | 356.54)  | 0.02)   |        | 387.57)  | 222.46)  | -1.48)  | 32.82) | 23.57) | -1.50)  |         |        |
| Samoa                            | 21.27   | 20.99   | -0.04   |        | 186.66   | 186.17   | -0.00   |        | 296.11   | 448.41   | 1.44    | 5.23   | 7.91   | 1.44    |         |        |
|                                  | (7.30,  | (8.75,  | (-0.05, | <0.001 | (136.01, | (143.34, | (-0.02, | 0.662  | (231.45, | (380.87, | (1.38,  | <0.001 | (0.25, | (1.47,  | (1.37,  | <0.001 |
|                                  | 49.54)  | 42.88)  | -0.03)  |        | 250.61)  | 238.06)  | 0.01)   |        | 373.85)  | 524.78)  | 1.51)   | 26.35) | 24.76) | 1.51)   |         |        |
| San Marino                       | 24.74   | 23.57   | -0.15   |        | 162.01   | 170.74   | 0.19    |        | 27.14    | 24.32    | -0.37   | 0.44   | 0.40   | -0.28   |         |        |
|                                  | (0.84,  | (1.19,  | (-0.17, | <0.001 | (64.28,  | (81.03,  | (0.13,  | <0.001 | (1.03,   | (1.48,   | (-0.51, | <0.001 | (0.00, | (0.00,  | (-0.66, | 0.159  |
|                                  | 136.99) | 119.53) | -0.12)  |        | 339.45)  | 323.08)  | 0.25)   |        | 142.30)  | 119.73)  | -0.24)  | 94.18) | 79.68) | 0.11)   |         |        |
| Sao Tome and Principe            | 20.20   | 21.87   | 0.27    |        | 115.46   | 123.54   | 0.24    |        | 111.47   | 133.04   | 0.77    | 1.97   | 2.34   | 0.74    |         |        |
|                                  | (5.00,  | (9.83,  | (0.26,  | <0.001 | (69.61,  | (90.95,  | (0.19,  | <0.001 | (66.67,  | (99.39,  | (-0.04, | 0.061  | (0.00, | (0.04,  | (-0.06, | 0.068  |
|                                  | 56.97)  | 42.35)  | 0.28)   |        | 181.36)  | 164.19)  | 0.28)   |        | 176.27)  | 174.64)  | 1.59)   | 29.00) | 14.37) | 1.55)   |         |        |
| Saudi Arabia                     | 28.45   | 30.63   | 0.26    |        | 179.74   | 203.25   | 0.43    |        | 430.35   | 382.52   | -0.43   | 7.48   | 6.74   | -0.38   |         |        |
|                                  | (26.34, | (29.45, | (0.24,  | <0.001 | (174.26, | (200.24, | (0.40,  | <0.001 | (422.07, | (378.33, | (-0.77, | 0.014  | (6.42, | (6.19,  | (-0.72, | 0.025  |
|                                  | 30.69)  | 31.85)  | 0.27)   |        | 185.36)  | 206.30)  | 0.47)   |        | 438.77)  | 386.75)  | -0.09)  | 8.69)  | 7.32)  | -0.05)  |         |        |
| Senegal                          | 22.38   | 22.72   | 0.05    |        | 124.29   | 122.63   | -0.04   |        | 137.18   | 114.77   | -0.66   | 2.38   | 1.98   | -0.53   |         |        |
|                                  | (19.81, | (20.98, | (0.04,  | <0.001 | (117.92, | (118.42, | (-0.06, | 0.001  | (130.61, | (110.77, | (-0.97, | <0.001 | (1.58, | (1.48,  | (-0.99, | 0.024  |
|                                  | 25.21)  | 24.58)  | 0.06)   |        | 130.92)  | 126.95)  | -0.02)  |        | 144.00)  | 118.88)  | -0.35)  | 3.47)  | 2.59)  | -0.07)  |         |        |
| Serbia                           | 25.79   | 28.37   | 0.32    |        | 190.40   | 207.57   | 0.28    |        | 192.34   | 70.30    | -3.38   | 3.35   | 1.20   | -3.44   |         |        |
|                                  | (23.46, | (25.69, | (0.27,  | <0.001 | (184.09, | (200.38, | (0.22,  | <0.001 | (185.96, | (66.15,  | (-3.75, | <0.001 | (2.56, | (0.71,  | (-3.85, | <0.001 |
|                                  | 28.30)  | 31.27)  | 0.36)   |        | 196.88)  | 214.97)  | 0.35)   |        | 198.89)  | 74.67)   | -3.01)  | 4.33)  | 1.92)  | -3.04)  |         |        |
| Seychelles                       | 17.92   | 17.32   | -0.11   | <0.001 | 141.28   | 135.31   | -0.13   | 0.001  | 253.52   | 141.17   | -2.05   | <0.001 | 4.41   | 2.42    | -2.10   | <0.001 |

|                 |         |         |         |        |          |          |         |        |           |           |         |        |         |         |         |        |
|-----------------|---------|---------|---------|--------|----------|----------|---------|--------|-----------|-----------|---------|--------|---------|---------|---------|--------|
|                 | (2.80,  | (3.73,  | (-0.15, |        | (83.43,  | (87.47,  | (-0.21, |        | (174.54,  | (91.80,   | (-2.74, |        | (0.01,  | (0.00,  | (-2.80, |        |
|                 | 63.98)  | 51.71)  | -0.07)  |        | 226.49)  | 201.42)  | -0.05)  |        | 358.72)   | 208.94)   | -1.35)  |        | 43.13)  | 28.21)  | -1.39)  |        |
|                 | 23.75   | 24.34   | 0.08    |        | 126.45   | 126.17   | 0.02    |        | 156.48    | 207.86    | 1.01    |        | 2.73    | 3.62    | 1.01    |        |
| Sierra Leone    | (20.18, | (21.96, | (0.07,  | <0.001 | (117.80, | (120.51, | (-0.08, | 0.754  | (146.95,  | (200.73,  | (0.78,  | <0.001 | (1.60,  | (2.72,  | (0.75,  | <0.001 |
|                 | 27.79)  | 26.91)  | 0.10)   |        | 135.57)  | 132.04)  | 0.11)   |        | 166.48)   | 215.19)   | 1.24)   |        | 4.39)   | 4.72)   | 1.27)   |        |
|                 | 26.45   | 21.32   | -0.74   |        | 172.54   | 142.42   | -0.66   |        | 55.97     | 11.39     | -5.46   |        | 0.98    | 0.19    | -5.68   |        |
| Singapore       | (22.93, | (18.61, | (-0.77, | <0.001 | (163.37, | (135.85, | (-0.68, | <0.001 | (50.79,   | (9.60,    | (-6.65, | <0.001 | (0.41,  | (0.03,  | (-7.13, | <0.001 |
|                 | 30.40)  | 24.42)  | -0.70)  |        | 182.15)  | 149.35)  | -0.64)  |        | 61.58)    | 13.56)    | -4.25)  |        | 2.05)   | 0.92)   | -4.21)  |        |
|                 | 19.89   | 15.32   | -0.90   |        | 179.24   | 142.96   | -0.78   |        | 153.89    | 57.61     | -3.22   |        | 2.70    | 0.97    | -3.35   |        |
| Slovakia        | (17.26, | (12.91, | (-0.92, | <0.001 | (171.37, | (135.71, | (-0.81, | <0.001 | (146.61,  | (53.01,   | (-4.39, | <0.001 | (1.82,  | (0.47,  | (-4.53, | <0.001 |
|                 | 22.83)  | 18.12)  | -0.88)  |        | 187.41)  | 150.58)  | -0.75)  |        | 161.45)   | 62.59)    | -2.03)  |        | 3.89)   | 1.93)   | -2.16)  |        |
|                 | 18.36   | 15.59   | -0.57   |        | 183.50   | 155.19   | -0.58   |        | 58.76     | 15.18     | -4.76   |        | 0.98    | 0.21    | -5.40   |        |
| Slovenia        | (14.37, | (11.48, | (-0.63, | <0.001 | (170.56, | (142.13, | (-0.61, | <0.001 | (51.56,   | (11.30,   | (-5.62, | <0.001 | (0.27,  | (0.00,  | (-6.46, | <0.001 |
|                 | 23.19)  | 20.94)  | -0.51)  |        | 197.23)  | 169.33)  | -0.56)  |        | 66.75)    | 20.23)    | -3.89)  |        | 2.65)   | 2.12)   | -4.33)  |        |
|                 | 21.16   | 21.05   | -0.02   |        | 146.64   | 146.79   | 0.02    |        | 1721.53   | 1849.19   |         |        | 30.61   | 32.74   | 0.23    |        |
| Solomon Islands | (10.42, | (13.72, | (-0.05, | 0.421  | (114.08, | (125.88, | (-0.07, | 0.707  | (1606.89, | (1773.44, |         |        | (17.01, | (23.34, | (0.11,  | <0.001 |
|                 | 38.92)  | 30.98)  | 0.02)   |        | 185.94)  | 170.23)  | 0.10)   |        | ,         | ,         | 0.36)   |        | 51.27)  | 44.73)  | 0.35)   |        |
|                 | 20.95   | 22.29   | 0.21    |        | 101.20   | 107.28   | 0.20    |        | 1842.55)  | 1927.40)  |         |        |         |         |         |        |
| Somalia         | (18.40, | (20.68, | (0.18,  | <0.001 | (95.51,  | (103.61, | (0.18,  | <0.001 | 154.83    | 200.59    | 0.92    |        | 2.69    | 3.47    | 0.90    |        |
|                 | 23.77)  | 23.99)  | 0.23)   |        | 107.16)  | 111.05)  | 0.22)   |        | (147.81,  | (195.72,  | (0.79,  | <0.001 | (1.83,  | (2.85,  | (0.77,  | <0.001 |
|                 | 30.36   | 26.27   | -0.50   |        | 125.81   | 106.97   | -0.55   |        | 162.10)   | 205.55)   | 1.05)   |        | 3.81)   | 4.18)   | 1.03)   |        |
| South Africa    | (29.11, | (25.37, | (-0.55, | <0.001 | (123.18, | (105.16, | (-0.60, | <0.001 | 276.99    | 99.40     | -3.36   |        | 4.89    | 1.73    | -3.42   |        |
|                 | 31.65)  | 27.19)  | -0.46)  |        | 128.47)  | 108.82)  | -0.51)  |        | (273.14,  | (97.65,   | (-5.54, | 0.003  | (4.39,  | (1.51,  | (-5.63, | 0.003  |
|                 | 18.69   | 20.64   | 0.34    |        | 101.22   | 113.02   | 0.37    |        | 280.88)   | 101.17)   | -1.13)  |        | 5.44)   | 1.98)   | -1.15)  |        |
| South Sudan     | (15.96, | (18.44, | (0.31,  | <0.001 | (94.44,  | (107.72, | (0.31,  | <0.001 | 80.78     | 100.13    | 0.61    |        | 1.36    | 1.68    | 0.60    |        |
|                 | 21.79)  | 23.05)  | 0.36)   |        | 108.37)  | 118.52)  | 0.43)   |        | (74.98,   | (95.32,   | (0.15,  | 0.009  | (0.70,  | (1.11,  | (0.16,  | 0.007  |
|                 | 27.75   | 26.70   | -0.13   |        | 163.68   | 182.32   | 0.38    |        | 86.94)    | 105.15)   | 1.06)   |        | 2.43)   | 2.47)   | 1.04)   |        |
| Spain           | (26.56, | (25.45, | (-0.19, | <0.001 | (160.72, | (179.25, | (0.32,  | <0.001 | 82.22     | 27.69     | -3.73   |        | 1.38    | 0.46    | -3.77   |        |
|                 | 28.99)  | 27.99)  | -0.06)  |        | 166.69)  | 185.43)  | 0.43)   |        | (80.14,   | (26.49,   | (-4.04, | <0.001 | (1.12,  | (0.32,  | (-4.11, | <0.001 |
|                 | 17.93   | 17.37   | -0.11   |        | 137.19   | 132.68   | -0.11   |        | 84.35)    | 28.94)    | -3.42)  |        | 1.68)   | 0.65)   | -3.42)  |        |
| Sri Lanka       | (16.57, | (16.13, | (-0.12, | <0.001 | (133.34, | (129.27, | (-0.13, | <0.001 | 313.96    | 137.63    | -2.67   |        | 5.34    | 2.32    | -2.70   |        |
|                 | 19.38)  | 18.67)  | -0.10)  |        | 141.13)  | 136.16)  | -0.08)  |        | (308.19,  | (134.12,  | (-4.13, | <0.001 | (4.61,  | (1.88,  | (-4.19, | <0.001 |
|                 |         |         |         |        |          |          |         |        | 319.82)   | 141.22)   | -1.19)  |        | 6.16)   | 2.82)   | -1.19)  |        |

|                            |         |         |         |        |          |          |         |        |          |          |         |        |         |         |         |        |
|----------------------------|---------|---------|---------|--------|----------|----------|---------|--------|----------|----------|---------|--------|---------|---------|---------|--------|
|                            | 30.29   | 31.95   | 0.18    |        | 181.02   | 199.86   | 0.37    |        | 982.80   | 558.78   | -1.91   |        | 17.11   | 9.68    | -1.92   |        |
| Sudan                      | (28.46, | (30.73, | (0.18,  | <0.001 | (176.40, | (196.75, | (0.23,  | <0.001 | (972.29, | (553.66, | (-2.01, | <0.001 | (15.73, | (9.02,  | (-2.01, | <0.001 |
|                            | 32.21)  | 33.21)  | 0.19)   |        | 185.73)  | 203.01)  | 0.50)   |        | 993.39)  | 563.94)  | -1.81)  |        | 18.57)  | 10.39)  | -1.84)  |        |
|                            | 56.49   | 62.35   | 0.35    |        | 274.69   | 309.24   | 0.42    |        | 271.95   | 169.12   | -1.33   |        | 4.78    | 2.94    | -1.35   |        |
| Suriname                   | (40.34, | (48.43, | (0.32,  | <0.001 | (235.98, | (277.27, | (0.33,  | <0.001 | (233.76, | (145.67, | (-3.96, | 0.331  | (1.03,  | (0.66,  | (-4.17, | 0.361  |
|                            | 77.37)  | 79.08)  | 0.38)   |        | 318.16)  | 343.95)  | 0.52)   |        | 314.86)  | 195.32)  | 1.37)   |        | 14.13)  | 8.41)   | 1.56)   |        |
|                            | 27.46   | 33.01   | 0.64    |        | 187.08   | 211.60   | 0.42    |        | 62.20    | 18.58    | -4.07   |        | 1.06    | 0.28    | -4.51   |        |
| Sweden                     | (24.85, | (30.27, | (0.61,  | <0.001 | (180.24, | (204.74, | (0.39,  | <0.001 | (58.29,  | (16.57,  | (-4.95, | <0.001 | (0.60,  | (0.09,  | (-5.90, | <0.001 |
|                            | 30.29)  | 35.95)  | 0.67)   |        | 194.12)  | 218.67)  | 0.46)   |        | 66.32)   | 20.78)   | -3.19)  |        | 1.74)   | 0.72)   | -3.09)  |        |
|                            | 23.15   | 22.04   | -0.15   |        | 144.63   | 152.41   | 0.19    |        | 52.63    | 14.71    | -4.29   |        | 0.88    | 0.23    | -4.42   |        |
| Switzerland                | (20.65, | (19.66, | (-0.19, | <0.001 | (138.34, | (146.32, | (0.14,  | <0.001 | (48.81,  | (12.85,  | (-4.74, | <0.001 | (0.46,  | (0.06,  | (-5.05, | <0.001 |
|                            | 25.91)  | 24.67)  | -0.10)  |        | 151.16)  | 158.72)  | 0.24)   |        | 56.70)   | 16.81)   | -3.83)  |        | 1.61)   | 0.72)   | -3.79)  |        |
|                            | 28.85   | 29.90   | 0.12    |        | 186.00   | 201.43   | 0.30    |        | 1586.85  | 893.57   | -1.91   |        | 27.12   | 15.23   | -1.93   |        |
| Syrian Arab Republic       | (26.46, | (27.80, | (0.10,  | <0.001 | (179.70, | (195.98, | (0.19,  | <0.001 | (1569.36 | (882.10, | (-2.49, | <0.001 | (24.85, | (13.76, | (-2.51, | <0.001 |
|                            | 31.40)  | 32.13)  | 0.14)   |        | 192.48)  | 207.02)  | 0.41)   |        | ,        | 905.17)  | -1.33)  |        | 29.55)  | 16.83)  | -1.34)  |        |
|                            | 15.38   | 15.42   | 0.02    |        | 207.38   | 214.90   | 0.13    |        | 85.93    | 43.06    | -2.28   |        | 1.36    | 0.61    | -2.69   |        |
| Taiwan (Province of China) | (14.27, | (14.26, | (-0.01, | 0.255  | (203.26, | (210.59, | (0.03,  | 0.012  | (83.28,  | (41.13,  | (-2.96, | <0.001 | (1.04,  | (0.40,  | (-3.66, | <0.001 |
|                            | 16.55)  | 16.66)  | 0.04)   |        | 211.57)  | 219.30)  | 0.24)   |        | 88.66)   | 45.07)   | -1.59)  |        | 1.74)   | 0.91)   | -1.72)  |        |
|                            | 30.08   | 29.38   | -0.08   |        | 188.79   | 181.02   | -0.13   |        | 370.46   | 333.35   | -0.29   |        | 6.57    | 5.94    | -0.27   |        |
| Tajikistan                 | (26.67, | (27.03, | (-0.11, | <0.001 | (179.69, | (174.98, | (-0.18, | <0.001 | (357.76, | (325.17, | (-0.91, | 0.361  | (4.97,  | (4.89,  | (-0.87, | 0.387  |
|                            | 33.84)  | 31.89)  | -0.05)  |        | 198.24)  | 187.22)  | -0.09)  |        | 383.51)  | 341.68)  | 0.33)   |        | 8.56)   | 7.16)   | 0.34)   |        |
|                            | 15.47   | 15.36   | -0.02   |        | 109.84   | 109.64   | 0.00    |        | 161.42   | 86.41    | -2.14   |        | 2.81    | 1.45    | -2.26   |        |
| Thailand                   | (14.78, | (14.70, | (-0.04, | 0.232  | (107.98, | (107.88, | (-0.04, | 0.962  | (159.18, | (84.81,  | (-3.61, | 0.005  | (2.52,  | (1.25,  | (-3.77, | 0.004  |
|                            | 16.17)  | 16.05)  | 0.01)   |        | 111.72)  | 111.42)  | 0.05)   |        | 163.69)  | 88.03)   | -0.64)  |        | 3.12)   | 1.68)   | -0.73)  |        |
|                            | 16.97   | 17.30   | 0.07    |        | 112.55   | 114.90   | 0.10    |        | 162.62   | 224.88   | 1.30    |        | 2.82    | 3.87    | 1.23    |        |
| Timor-Leste                | (10.89, | (12.22, | (0.04,  | <0.001 | (95.45,  | (100.66, | (-0.09, | 0.283  | (142.18, | (205.47, | (0.58,  | <0.001 | (0.75,  | (1.70,  | (0.54,  | <0.001 |
|                            | 25.40)  | 23.93)  | 0.09)   |        | 131.93)  | 130.68)  | 0.29)   |        | 185.30)  | 245.76)  | 2.02)   |        | 7.52)   | 7.72)   | 1.93)   |        |
|                            | 21.64   | 23.04   | 0.22    |        | 110.61   | 116.11   | 0.19    |        | 167.01   | 152.98   | -0.30   |        | 2.91    | 2.66    | -0.30   |        |
| Togo                       | (18.14, | (20.74, | (0.20,  | <0.001 | (102.27, | (110.83, | (0.10,  | <0.001 | (156.93, | (146.96, | (-0.68, | 0.120  | (1.71,  | (1.91,  | (-0.66, | 0.106  |
|                            | 25.64)  | 25.52)  | 0.23)   |        | 119.47)  | 121.58)  | 0.28)   |        | 177.59)  | 159.19)  | 0.08)   |        | 4.66)   | 3.59)   | 0.06)   |        |
|                            | 20.34   | 20.52   | 0.03    |        | 167.71   | 174.69   | 0.15    |        | 434.52   | 531.40   | 0.70    |        | 7.73    | 9.40    | 0.68    |        |
| Tokelau                    | (0.00,  | (0.00,  | (0.00,  | 0.035  | (0.07,   | (0.01,   | (0.12,  | <0.001 | (15.92,  | (16.96,  | (0.66,  | <0.001 | (0.00,  | (0.00,  | (0.64,  | <0.001 |

|                      |         |         |         |        |          |          |         |        |          |          |         |        |          |          |         |        |
|----------------------|---------|---------|---------|--------|----------|----------|---------|--------|----------|----------|---------|--------|----------|----------|---------|--------|
|                      | 1740.70 | 2344.12 | 0.06)   |        | 1998.35) | 2618.99) | 0.17)   |        | 2445.71) | 3193.63) | 0.75)   |        | 1718.23) | 2324.81) | 0.73)   |        |
|                      | )       | )       |         |        |          |          |         |        |          |          |         |        | )        | )        |         |        |
|                      | 21.25   | 21.39   | 0.03    |        | 199.07   | 203.22   | 0.07    |        | 144.55   | 139.35   | -0.10   |        | 2.50     | 2.37     | -0.16   |        |
| Tonga                | (4.70,  | (5.71,  | (-0.03, | 0.349  | (132.62, | (142.63, | (0.05,  | <0.001 | (88.83,  | (90.21,  | (-0.35, | 0.401  | (0.00,   | (0.00,   | (-0.42, | 0.254  |
|                      | 62.69)  | 55.87)  | 0.10)   |        | 288.16)  | 281.05)  | 0.10)   |        | 223.22)  | 205.89)  | 0.14)   |        | 33.35)   | 25.80)   | 0.11)   |        |
| Trinidad and Tobago  | 67.58   | 65.81   | -0.09   |        | 364.33   | 353.04   | -0.09   |        | 194.08   | 109.49   | -2.15   |        | 3.39     | 1.88     | -2.13   |        |
|                      | (57.67, | (56.44, | (-0.11, | <0.001 | (340.41, | (331.70, | (-0.17, | 0.028  | (176.72, | (97.59,  | (-2.70, | <0.001 | (1.46,   | (0.64,   | (-2.75, | <0.001 |
|                      | 78.75)  | 76.43)  | -0.08)  |        | 389.52)  | 375.56)  | -0.01)  |        | 212.73)  | 122.61)  | -1.60)  |        | 6.75)    | 4.57)    | -1.50)  |        |
| Tunisia              | 27.46   | 27.44   | -0.00   |        | 176.24   | 182.50   | 0.12    |        | 373.14   | 223.68   | -1.69   |        | 6.47     | 3.84     | -1.73   |        |
|                      | (24.87, | (25.41, | (-0.02, | 0.816  | (169.44, | (177.29, | (0.10,  | <0.001 | (363.45, | (217.76, | (-1.91, | <0.001 | (5.24,   | (3.10,   | (-1.94, | <0.001 |
|                      | 30.26)  | 29.61)  | 0.01)   |        | 183.26)  | 187.84)  | 0.14)   |        | 383.04)  | 229.75)  | -1.47)  |        | 7.92)    | 4.72)    | -1.51)  |        |
| Turkey               | 21.53   | 17.59   | -0.70   |        | 188.70   | 148.35   | -0.81   |        | 223.42   | 85.29    | -3.29   |        | 3.87     | 1.42     | -3.42   |        |
|                      | (20.66, | (16.97, | (-0.72, | <0.001 | (186.09, | (146.56, | (-0.87, | <0.001 | (220.60, | (83.91,  | (-4.02, | <0.001 | (3.51,   | (1.25,   | (-4.12, | <0.001 |
|                      | 22.42)  | 18.23)  | -0.67)  |        | 191.34)  | 150.17)  | -0.75)  |        | 226.26)  | 86.69)   | -2.55)  |        | 4.27)    | 1.62)    | -2.71)  |        |
| Turkmenistan         | 29.71   | 30.13   | 0.05    |        | 183.50   | 188.12   | 0.09    |        | 437.52   | 411.71   | -0.14   |        | 7.71     | 7.15     | -0.17   |        |
|                      | (25.86, | (26.77, | (0.02,  | <0.001 | (173.40, | (179.55, | (0.03,  | 0.004  | (422.00, | (398.94, | (-1.36, | 0.831  | (5.76,   | (5.56,   | (-1.39, | 0.784  |
|                      | 34.01)  | 33.81)  | 0.07)   |        | 194.06)  | 197.00)  | 0.16)   |        | 453.50)  | 424.79)  | 1.11)   |        | 10.14)   | 9.08)    | 1.06)   |        |
| Tuvalu               | 20.60   | 20.88   | 0.05    |        | 161.39   | 168.61   | 0.17    |        | 517.46   | 552.57   | 0.24    |        | 9.20     | 9.79     | 0.23    |        |
|                      | (0.00,  | (0.01,  | (0.03,  | <0.001 | (34.47,  | (39.30,  | (0.08,  | <0.001 | (247.66, | (277.87, | (0.16,  | <0.001 | (0.00,   | (0.00,   | (0.15,  | <0.001 |
|                      | 243.27) | 234.98) | 0.07)   |        | 471.22)  | 472.67)  | 0.26)   |        | 958.36)  | 989.89)  | 0.32)   |        | 221.79)  | 214.89)  | 0.31)   |        |
| Uganda               | 18.66   | 18.58   | -0.02   |        | 82.35    | 82.32    | -0.01   |        | 54.21    | 93.29    | 1.95    |        | 0.90     | 1.56     | 1.96    |        |
|                      | (17.04, | (17.58, | (-0.04, | 0.236  | (78.76,  | (80.11,  | (-0.04, | 0.653  | (51.45,  | (91.06,  | (1.57,  | <0.001 | (0.58,   | (1.28,   | (1.54,  | <0.001 |
|                      | 20.40)  | 19.63)  | 0.01)   |        | 86.08)   | 84.58)   | 0.02)   |        | 57.10)   | 95.56)   | 2.33)   |        | 1.37)    | 1.89)    | 2.37)   |        |
| Ukraine              | 27.90   | 29.84   | 0.23    |        | 195.38   | 209.43   | 0.26    |        | 136.26   | 254.35   | 2.21    |        | 2.36     | 4.45     | 2.24    |        |
|                      | (26.88, | (28.64, | (0.21,  | <0.001 | (192.71, | (206.39, | (0.18,  | <0.001 | (134.01, | (250.90, | (-0.70, | 0.139  | (2.08,   | (4.01,   | (-0.72, | 0.140  |
|                      | 28.96)  | 31.09)  | 0.25)   |        | 198.09)  | 212.52)  | 0.35)   |        | 138.55)  | 257.84)  | 5.21)   |        | 2.68)    | 4.94)    | 5.29)   |        |
| United Arab Emirates | 29.31   | 29.75   | 0.05    |        | 192.74   | 199.85   | 0.13    |        | 240.09   | 165.99   | -1.30   |        | 3.92     | 2.73     | -1.28   |        |
|                      | (23.51, | (26.76, | (0.03,  | <0.001 | (177.26, | (192.58, | (0.09,  | <0.001 | (222.78, | (158.06, | (-1.68, | <0.001 | (2.01,   | (1.81,   | (-1.70, | <0.001 |
|                      | 36.20)  | 33.07)  | 0.08)   |        | 209.29)  | 207.40)  | 0.17)   |        | 258.46)  | 174.27)  | -0.92)  |        | 7.02)    | 4.03)    | -0.85)  |        |
| United Kingdom       | 26.33   | 24.99   | -0.17   |        | 168.27   | 173.24   | 0.12    |        | 75.56    | 38.74    | -2.20   |        | 1.32     | 0.67     | -2.19   |        |
|                      | (25.37, | (24.07, | (-0.21, | <0.001 | (165.83, | (170.89, | (-0.00, | 0.051  | (73.92,  | (37.64,  | (-2.36, | <0.001 | (1.11,   | (0.54,   | (-2.39, | <0.001 |
|                      | 27.32)  | 25.93)  | -0.14)  |        | 170.74)  | 175.61)  | 0.23)   |        | 77.22)   | 39.86)   | -2.04)  |        | 1.55)    | 0.84)    | -1.99)  |        |
| United Republic of   | 19.41   | 21.99   | 0.43    |        | 88.99    | 102.01   | 0.48    |        | 109.09   | 112.60   | 0.14    |        | 1.81     | 1.89     | 0.19    |        |
|                      |         |         | <0.001  |        |          |          | <0.001  |        |          |          | 0.302   |        |          |          | 0.224   |        |

|                                    |                |                |                |        |                  |                  |                |        |                  |                  |                |        |                |               |                |
|------------------------------------|----------------|----------------|----------------|--------|------------------|------------------|----------------|--------|------------------|------------------|----------------|--------|----------------|---------------|----------------|
| Tanzania                           | (18.10, 20.79) | (21.09, 22.92) | (0.41, 0.44)   |        | (86.06, 92.00)   | (100.01, 104.05) | (0.44, 0.51)   |        | (106.07, 112.19) | (110.58, 114.65) | (-0.13, 0.42)  |        | (1.43, 2.26)   | (1.64, 2.18)  | (-0.12, 0.50)  |
|                                    | 29.95          | 33.01          | 0.36           |        | 151.89           | 189.73           | 0.77           |        | 101.56           | 95.64            | -0.18          |        | 1.76           | 1.67          | -0.16          |
| United States of America           | (29.49, 30.41) | (32.53, 33.49) | (0.26, 0.46)   | <0.001 | (150.87, 152.92) | (188.61, 190.86) | (0.68, 0.87)   | <0.001 | (100.72, 102.41) | (94.85, 96.44)   | (-0.49, 0.14)  | 0.270  | (1.65, 1.87)   | (1.56, 1.78)  | (-0.50, 0.17)  |
|                                    | 52.73          | 53.37          | 0.04           |        | 279.90           | 282.70           | 0.03           |        | 190.96           | 83.33            | -2.78          |        | 3.34           | 1.43          | -2.84          |
| United States Virgin Islands       | (26.23, 29.50) | (24.01, 24.02) | (0.03, 0.06)   | <0.001 | (213.49, 361.20) | (208.87, 375.80) | (0.00, 0.05)   | 0.032  | (136.90, 260.07) | (45.85, 141.14)  | (-3.16, -2.41) | <0.001 | (0.02, 25.48)  | (0.00, 28.60) | (-3.27, -2.41) |
|                                    | 16.17          | 14.59          | -0.35          |        | 108.73           | 103.74           | -0.14          |        | 99.54            | 34.68            | -3.66          |        | 1.73           | 0.59          | -3.70          |
| Uruguay                            | (13.04, 19.83) | (11.74, 17.95) | (-0.37, -0.34) | <0.001 | (100.34, 117.63) | (95.94, 112.03)  | (-0.26, -0.02) | 0.022  | (91.52, 108.07)  | (30.24, 39.60)   | (-4.05, -3.26) | <0.001 | (0.82, 3.20)   | (0.15, 1.61)  | (-4.11, -3.29) |
|                                    | 26.66          | 27.70          | 0.13           |        | 165.39           | 174.41           | 0.19           |        | 311.10           | 603.80           | 2.43           |        | 5.45           | 10.48         | 2.40           |
| Uzbekistan                         | (25.08, 28.32) | (26.50, 28.95) | (0.12, 0.14)   | <0.001 | (161.29, 169.57) | (171.35, 177.51) | (0.13, 0.26)   | <0.001 | (305.55, 316.73) | (598.12, 609.52) | (1.76, 3.10)   | <0.001 | (4.73, 6.25)   | (9.74, 11.26) | (1.73, 3.07)   |
|                                    | 23.42          | 22.99          | -0.06          |        | 196.28           | 193.82           | -0.03          |        | 323.40           | 539.10           | 1.73           |        | 5.69           | 9.52          | 1.74           |
| Vanuatu                            | (8.79, 51.33)  | (12.19, 39.83) | (-0.09, -0.04) | <0.001 | (145.62, 259.34) | (158.38, 235.03) | (-0.07, 0.01)  | 0.100  | (257.67, 401.31) | (479.26, 604.57) | (1.43, 2.03)   | <0.001 | (0.38, 25.86)  | (3.16, 22.32) | (1.43, 2.05)   |
| Venezuela (Bolivarian Republic of) | 22.47          | 19.38          | -0.51          |        | 153.16           | 136.06           | -0.40          |        | 291.05           | 229.56           | -1.07          |        | 5.11           | 3.93          | -1.16          |
|                                    | (20.99, 24.03) | (18.25, 20.57) | (-0.56, -0.46) | <0.001 | (149.18, 157.23) | (133.08, 139.10) | (-0.44, -0.37) | <0.001 | (285.59, 296.60) | (225.62, 233.54) | (-2.47, 0.35)  | 0.139  | (4.40, 5.89)   | (3.43, 4.48)  | (-2.60, 0.30)  |
|                                    | 16.53          | 16.37          | -0.02          |        | 130.06           | 129.52           | -0.01          |        | 144.14           | 74.51            | -2.24          |        | 2.52           | 1.26          | -2.37          |
| Viet Nam                           | (15.85, 17.24) | (15.83, 16.93) | (-0.05, 0.00)  | 0.047  | (128.09, 132.06) | (128.00, 131.05) | (-0.04, 0.02)  | 0.605  | (142.07, 146.23) | (73.34, 75.70)   | (-2.38, -2.11) | <0.001 | (2.25, 2.81)   | (1.11, 1.42)  | (-2.52, -2.22) |
|                                    | 30.67          | 31.36          | 0.08           |        | 181.89           | 191.15           | 0.20           |        | 652.16           | 499.84           | -0.87          |        | 11.60          | 8.80          | -0.90          |
| Yemen                              | (28.35, 33.14) | (29.97, 32.80) | (0.06, 0.09)   | <0.001 | (176.07, 187.85) | (187.67, 194.68) | (0.02, 0.38)   | 0.027  | (641.20, 663.28) | (494.24, 505.49) | (-1.39, -0.34) | 0.001  | (10.17, 13.17) | (8.07, 9.58)  | (-1.09, -0.72) |
|                                    | 20.46          | 20.50          | 0.01           |        | 86.52            | 87.49            | 0.04           |        | 271.17           | 176.32           | -1.48          |        | 4.69           | 3.03          | -1.50          |
| Zambia                             | (17.98, 23.21) | (19.00, 22.10) | (-0.02, 0.03)  | 0.596  | (81.09, 92.23)   | (84.27, 90.82)   | (0.02, 0.06)   | <0.001 | (261.95, 280.66) | (171.88, 180.85) | (-1.83, -1.13) | <0.001 | (3.53, 6.13)   | (2.47, 3.69)  | (-1.85, -1.15) |
|                                    | 24.65          | 26.43          | 0.24           |        | 94.86            | 103.72           | 0.31           |        | 61.62            | 105.63           | 1.86           |        | 1.05           | 1.82          | 1.95           |
| Zimbabwe                           | (22.35, 27.14) | (24.62, 28.34) | (0.21, 0.28)   | <0.001 | (90.13, 99.77)   | (100.05, 107.49) | (0.29, 0.32)   | <0.001 | (57.95, 65.48)   | (101.99, 109.37) | (0.07, 3.69)   | 0.042  | (0.61, 1.68)   | (1.37, 2.38)  | (0.70, 3.22)   |

Men

|                     |         |         |         |        |          |          |         |        |          |          |         |        |         |         |         |        |
|---------------------|---------|---------|---------|--------|----------|----------|---------|--------|----------|----------|---------|--------|---------|---------|---------|--------|
|                     | 47.50   | 49.56   | 0.14    |        | 291.57   | 311.44   | 0.25    |        | 1459.36  | 1051.58  | -1.12   |        | 26.19   | 18.85   | -1.13   |        |
| Afghanistan         | (43.56, | (47.77, | (0.12,  | <0.001 | (281.43, | (306.77, | (0.11,  | 0.001  | (1436.89 | (1043.06 | (-1.37, | <0.001 | (23.24, | (17.71, | (-1.37, | <0.001 |
|                     | 51.72)  | 51.40)  | 0.16)   |        | 302.00)  | 316.16)  | 0.40)   |        | ,        | ,        | -0.88)  |        | 29.45)  | 20.04)  | -0.88)  |        |
|                     |         |         |         |        |          |          |         |        | 1482.13) | 1060.15) |         |        |         |         |         |        |
|                     | 26.56   | 23.78   | -0.38   |        | 177.72   | 162.11   | -0.32   |        | 449.97   | 762.43   | 1.67    |        | 7.64    | 13.01   | 1.69    |        |
| Albania             | (22.81, | (19.65, | (-0.40, | <0.001 | (167.64, | (150.88, | (-0.34, | <0.001 | (434.21, | (738.35, | (0.61,  | 0.002  | (5.70,  | (10.02, | (0.63,  | 0.002  |
|                     | 30.77)  | 28.54)  | -0.35)  |        | 188.27)  | 173.98)  | -0.30)  |        | 466.18)  | 787.11)  | 2.75)   |        | 10.05)  | 16.63)  | 2.75)   |        |
|                     |         |         |         |        |          |          |         |        |          |          |         |        |         |         |         |        |
|                     | 40.23   | 40.14   | -0.01   |        | 260.87   | 266.06   | 0.08    |        | 1275.58  | 596.86   | -2.59   |        | 22.48   | 10.43   | -2.62   |        |
| Algeria             | (38.35, | (38.86, | (-0.05, | 0.386  | (255.92, | (262.79, | (0.00,  | 0.047  | (1264.82 | (591.88, | (-2.80, | <0.001 | (21.06, | (9.78,  | (-2.83, | <0.001 |
|                     | 42.19)  | 41.45)  | 0.02)   |        | 265.90)  | 269.37)  | 0.17)   |        | ,        | 601.87)  | -2.38)  |        | 23.98)  | 11.11)  | -2.40)  |        |
|                     |         |         |         |        |          |          |         |        | 1286.41) |          |         |        |         |         |         |        |
|                     | 30.39   | 31.83   | 0.15    |        | 247.36   | 267.86   | 0.27    |        | 852.14   | 921.76   | 0.25    |        | 15.39   | 16.57   | 0.24    |        |
| American Samoa      | (5.70,  | (6.07,  | (0.11,  | <0.001 | (154.26, | (169.17, | (0.24,  | <0.001 | (669.22, | (728.54, | (-0.04, | 0.090  | (0.85,  | (1.02,  | (-0.06, | 0.119  |
|                     | 95.49)  | 99.89)  | 0.18)   |        | 377.17)  | 404.76)  | 0.29)   |        | 1070.62) | 1151.89) | 0.55)   |        | 72.93)  | 77.00)  | 0.53)   |        |
|                     |         |         |         |        |          |          |         |        |          |          |         |        |         |         |         |        |
|                     | 33.60   | 29.63   | -0.43   |        | 169.11   | 164.41   | -0.10   |        | 170.30   | 102.47   | -1.74   |        | 3.02    | 1.82    | -1.75   |        |
| Andorra             | (10.78, | (8.45,  | (-0.48, | <0.001 | (109.70, | (106.57, | (-0.14, | <0.001 | (110.23, | (58.49,  | (-1.80, | <0.001 | (0.00,  | (0.00,  | (-1.80, | <0.001 |
|                     | 87.16)  | 81.11)  | -0.39)  |        | 255.19)  | 247.99)  | -0.05)  |        | 257.22)  | 172.86)  | -1.69)  |        | 43.74)  | 40.25)  | -1.69)  |        |
|                     |         |         |         |        |          |          |         |        |          |          |         |        |         |         |         |        |
|                     | 35.55   | 34.21   | -0.13   |        | 166.41   | 163.58   | -0.06   |        | 434.80   | 360.02   | -0.59   |        | 7.65    | 6.33    | -0.60   |        |
| Angola              | (32.83, | (32.54, | (-0.14, | <0.001 | (160.31, | (159.79, | (-0.07, | <0.001 | (425.07, | (354.50, | (-1.28, | 0.093  | (6.40,  | (5.61,  | (-1.29, | 0.090  |
|                     | 38.45)  | 35.95)  | -0.13)  |        | 172.68)  | 167.44)  | -0.05)  |        | 444.71)  | 365.61)  | 0.10)   |        | 9.08)   | 7.11)   | 0.09)   |        |
|                     |         |         |         |        |          |          |         |        |          |          |         |        |         |         |         |        |
|                     | 64.85   | 63.61   | -0.07   |        | 337.26   | 326.72   | -0.13   |        | 358.45   | 169.82   | -2.44   |        | 6.33    | 2.93    | -2.52   |        |
| Antigua and Barbuda | (27.44, | (31.78, | (-0.09, | <0.001 | (239.04, | (247.36, | (-0.20, | 0.001  | (257.32, | (114.20, | (-4.16, | 0.007  | (0.05,  | (0.00,  | (-4.17, | 0.003  |
|                     | 131.42) | 114.57) | -0.05)  |        | 463.27)  | 424.11)  | -0.05)  |        | 487.20)  | 243.80)  | -0.68)  |        | 46.84)  | 28.61)  | -0.84)  |        |
|                     |         |         |         |        |          |          |         |        |          |          |         |        |         |         |         |        |
|                     | 19.50   | 18.51   | -0.18   |        | 92.91    | 90.95    | -0.08   |        | 532.53   | 235.01   | -2.79   |        | 9.44    | 4.13    | -2.83   |        |
| Argentina           | (18.39, | (17.62, | (-0.20, | <0.001 | (90.46,  | (88.97,  | (-0.15, | 0.012  | (526.67, | (231.81, | (-3.09, | <0.001 | (8.68,  | (3.71,  | (-3.15, | <0.001 |
|                     | 20.66)  | 19.43)  | -0.16)  |        | 95.40)   | 92.96)   | -0.02)  |        | 538.43)  | 238.24)  | -2.48)  |        | 10.26)  | 4.58)   | -2.52)  |        |
|                     |         |         |         |        |          |          |         |        |          |          |         |        |         |         |         |        |
|                     | 43.90   | 41.87   | -0.16   |        | 244.61   | 239.43   | -0.08   |        | 810.42   | 544.12   | -1.36   |        | 14.70   | 9.76    | -1.41   |        |
| Armenia             | (39.14, | (36.91, | (-0.17, | <0.001 | (233.11, | (227.53, | (-0.11, | <0.001 | (789.33, | (525.95, | (-2.45, | 0.015  | (11.98, | (7.47,  | (-2.48, | 0.011  |
|                     | 49.09)  | 47.42)  | -0.14)  |        | 256.56)  | 251.89)  | -0.06)  |        | 831.95)  | 562.85)  | -0.26)  |        | 17.88)  | 12.65)  | -0.32)  |        |
|                     |         |         |         |        |          |          |         |        |          |          |         |        |         |         |         |        |
|                     | 87.65   | 79.67   | -0.33   |        | 359.84   | 351.97   | -0.14   |        | 282.22   | 139.08   | -2.40   |        | 5.07    | 2.50    | -2.41   |        |
| Australia           | (84.57, | (77.08, | (-0.37, | <0.001 | (353.62, | (346.57, | (-0.48, | 0.420  | (276.72, | (135.70, | (-3.03, | <0.001 | (4.36,  | (2.06,  | (-2.95, | <0.001 |
|                     | 90.81)  | 82.34)  | -0.29)  |        | 366.15)  | 357.45)  | 0.20)   |        | 287.82)  | 142.53)  | -1.78)  |        | 5.87)   | 3.01)   | -1.86)  |        |
|                     |         |         |         |        |          |          |         |        |          |          |         |        |         |         |         |        |
| Austria             | 38.48   | 32.61   | -0.59   | <0.001 | 183.19   | 167.06   | -0.31   | <0.001 | 286.55   | 106.83   | -3.38   | <0.001 | 5.14    | 1.90    | -3.42   | <0.001 |



|            |         |         |         |        |          |          |         |        |          |          |         |        |         |         |         |        |
|------------|---------|---------|---------|--------|----------|----------|---------|--------|----------|----------|---------|--------|---------|---------|---------|--------|
|            | (35.46, | (29.84, | (-0.63, |        | (176.47, | (160.80, | (-0.38, |        | (278.09, | (101.84, | (-4.31, | (4.06, | (1.29,  | (-4.34, |         |        |
|            | 41.71)  | 35.60)  | -0.54)  |        | 190.12)  | 173.53)  | -0.25)  |        | 295.22)  | 112.03)  | -2.45)  | 6.44)  | 2.74)   | -2.48)  |         |        |
|            |         |         |         |        |          |          |         |        | 1072.89  |          |         |        |         |         |         |        |
|            | 45.36   | 42.04   | -0.26   |        | 246.95   | 234.15   | -0.19   |        | (1055.45 | 768.50   | -1.37   | 19.37  | 13.64   | -1.14   |         |        |
| Azerbaijan | (41.91, | (39.45, | (-0.28, | <0.001 | (238.61, | (228.02, | (-0.20, | <0.001 | '        | (757.22, | (-2.47, | 0.016  | (17.08, | (12.17, | (-2.44, | 0.090  |
|            | 49.04)  | 44.78)  | -0.23)  |        | 255.52)  | 240.42)  | -0.17)  |        | 1090.56) | 779.93)  | -0.26)  | 21.90) | 15.25)  | 0.18)   |         |        |
|            |         |         |         |        |          |          |         |        |          |          |         |        |         |         |         |        |
|            | 66.85   | 68.68   | 0.10    |        | 319.91   | 323.88   | 0.05    |        | 525.53   | 415.31   | -0.93   | 9.39   | 7.41    | -0.95   |         |        |
| Bahamas    | (46.82, | (51.13, | (0.06,  | <0.001 | (272.61, | (284.28, | (0.03,  | <0.001 | (464.41, | (370.31, | (-2.21, | 0.157  | (2.92,  | (2.58,  | (-2.26, | 0.161  |
|            | 93.02)  | 90.43)  | 0.13)   |        | 373.32)  | 367.56)  | 0.06)   |        | 592.73)  | 464.39)  | 0.36)   | 22.85) | 16.83)  | 0.38)   |         |        |
|            |         |         |         |        |          |          |         |        |          |          |         |        |         |         |         |        |
|            | 47.25   | 42.90   | -0.34   |        | 341.75   | 310.17   | -0.33   |        | 1114.91  |          |         |        | 19.42   | 5.65    | -4.18   |        |
| Bahrain    | (37.61, | (36.74, | (-0.35, | <0.001 | (315.36, | (294.61, | (-0.39, | <0.001 | (1065.20 | 331.60   | -4.03   |        | (13.41, | (3.57,  | (-5.02, | <0.001 |
|            | 59.44)  | 50.11)  | -0.32)  |        | 370.47)  | 326.65)  | -0.26)  |        | '        | (313.61, | (-4.80, | <0.001 | 28.15)  | 8.91)   | -3.34)  |        |
|            |         |         |         |        |          |          |         |        | 1166.98) | 350.61)  | -3.25)  |        |         |         |         |        |
|            |         |         |         |        |          |          |         |        |          |          |         |        |         |         |         |        |
|            | 27.52   | 28.04   | 0.06    |        | 177.22   | 187.62   | 0.19    |        | 414.32   | 366.41   | -0.41   |        | 7.32    | 6.49    | -0.41   |        |
| Bangladesh | (26.78, | (27.46, | (0.05,  | <0.001 | (175.28, | (186.11, | (0.16,  | <0.001 | (411.39, | (364.30, | (-0.94, | 0.140  | (6.93,  | (6.22,  | (-0.92, | 0.119  |
|            | 28.28)  | 28.63)  | 0.07)   |        | 179.18)  | 189.15)  | 0.22)   |        | 417.27)  | 368.53)  | 0.13)   |        | 7.72)   | 6.78)   | 0.11)   |        |
|            |         |         |         |        |          |          |         |        |          |          |         |        |         |         |         |        |
|            | 66.28   | 68.45   | 0.12    |        | 347.50   | 357.19   | 0.09    |        | 334.91   | 161.31   | -2.44   |        | 5.92    | 2.78    | -2.56   |        |
| Barbados   | (46.34, | (47.51, | (0.09,  | <0.001 | (299.17, | (307.47, | (0.07,  | <0.001 | (287.49, | (128.37, | (-3.67, | <0.001 | (1.28,  | (0.18,  | (-4.00, | 0.001  |
|            | 92.03)  | 95.72)  | 0.14)   |        | 401.51)  | 412.94)  | 0.11)   |        | 388.00)  | 200.38)  | -1.19)  |        | 17.08)  | 12.86)  | -1.10)  |        |
|            |         |         |         |        |          |          |         |        |          |          |         |        |         |         |         |        |
|            | 44.22   | 42.19   | -0.17   |        | 207.20   | 197.62   | -0.17   |        | 936.99   | 706.34   | -0.92   |        | 17.11   | 12.88   | -0.92   |        |
| Belarus    | (41.42, | (39.22, | (-0.20, | <0.001 | (201.13, | (191.33, | (-0.21, | <0.001 | (924.03, | (694.48, | (-2.04, | 0.112  | (15.40, | (11.33, | (-2.06, | 0.116  |
|            | 47.18)  | 45.37)  | -0.14)  |        | 213.43)  | 204.11)  | -0.12)  |        | 950.11)  | 718.40)  | 0.21)   |        | 18.97)  | 14.64)  | 0.23)   |        |
|            |         |         |         |        |          |          |         |        |          |          |         |        |         |         |         |        |
|            | 37.47   | 33.44   | -0.39   |        | 181.84   | 181.42   | -0.01   |        | 337.03   | 95.27    | -4.26   |        | 5.97    | 1.66    | -4.32   |        |
| Belgium    | (34.84, | (30.88, | (-0.42, | <0.001 | (176.03, | (175.49, | (-0.04, | 0.738  | (329.04, | (90.98,  | (-5.05, | <0.001 | (4.95,  | (1.14,  | (-4.76, | <0.001 |
|            | 40.26)  | 36.17)  | -0.37)  |        | 187.81)  | 187.52)  | 0.03)   |        | 345.17)  | 99.73)   | -3.47)  |        | 7.15)   | 2.37)   | -3.89)  |        |
|            |         |         |         |        |          |          |         |        |          |          |         |        |         |         |         |        |
|            | 67.82   | 73.45   | 0.28    |        | 321.29   | 350.40   | 0.30    |        | 319.97   | 302.95   | -0.20   |        | 5.50    | 5.30    | -0.13   |        |
| Belize     | (42.10, | (56.06, | (0.26,  | <0.001 | (259.41, | (310.32, | (0.29,  | <0.001 | (260.07, | (266.02, | (-1.17, | 0.695  | (0.49,  | (1.51,  | (-1.16, | 0.808  |
|            | 104.46) | 94.67)  | 0.29)   |        | 394.00)  | 394.28)  | 0.32)   |        | 390.31)  | 343.65)  | 0.79)   |        | 23.52)  | 13.41)  | 0.92)   |        |
|            |         |         |         |        |          |          |         |        |          |          |         |        |         |         |         |        |
|            | 31.32   | 32.93   | 0.17    |        | 179.27   | 189.00   | 0.19    |        | 305.80   | 288.75   | -0.15   |        | 5.41    | 5.08    | -0.17   |        |
| Benin      | (27.23, | (30.46, | (0.16,  | <0.001 | (169.02, | (182.80, | (0.13,  | <0.001 | (292.52, | (281.19, | (-0.44, | 0.316  | (3.76,  | (4.12,  | (-0.46, | 0.257  |
|            | 35.88)  | 35.55)  | 0.19)   |        | 189.99)  | 195.36)  | 0.26)   |        | 319.54)  | 296.47)  | 0.14)   |        | 7.55)   | 6.22)   | 0.12)   |        |
|            |         |         |         |        |          |          |         |        |          |          |         |        |         |         |         |        |
|            | 60.82   | 57.76   | -0.18   |        | 328.80   | 307.39   | -0.27   |        | 456.50   | 144.96   | -4.21   |        | 7.98    | 2.49    | -4.68   |        |
| Bermuda    | (26.86, | (20.20, | (-0.26, | <0.001 | (241.39, | (210.93, | (-0.41, | <0.001 | (350.98, | (80.81,  | (-4.80, | <0.001 | (0.28,  | (0.00,  | (-5.08, | <0.001 |

|                   |         |         |         |        |          |          |         |        |           |          |         |        |         |         |         |        |
|-------------------|---------|---------|---------|--------|----------|----------|---------|--------|-----------|----------|---------|--------|---------|---------|---------|--------|
|                   | 124.85) | 137.02) | -0.10)  |        | 442.77)  | 439.66)  | -0.12)  |        | 588.54)   | 247.09)  | -3.61)  |        | 52.05)  | 56.13)  | -4.27)  |        |
|                   | 30.31   | 29.18   | -0.13   |        | 189.36   | 186.92   | -0.05   |        | 510.17    | 503.19   | -0.07   |        | 9.01    | 8.74    | -0.13   |        |
| Bhutan            | (21.03, | (21.95, | (-0.14, | <0.001 | (163.90, | (167.68, | (-0.10, | 0.043  | (468.66,  | (471.43, | (-0.20, | 0.312  | (4.26,  | (5.02,  | (-0.26, | 0.063  |
|                   | 42.58)  | 38.13)  | -0.12)  |        | 217.81)  | 207.85)  | -0.00)  |        | 554.56)   | 536.60)  | 0.07)   |        | 17.01)  | 14.28)  | 0.01)   |        |
| Bolivia           | 14.18   | 13.94   | -0.05   |        | 110.07   | 113.07   | 0.09    |        | 403.85    | 241.20   | -1.76   |        | 6.96    | 4.09    | -1.82   |        |
| (Plurinational    | (12.03, | (12.48, | (-0.07, | <0.001 | (103.76, | (108.75, | (0.08,  | <0.001 | (392.00,  | (234.97, | (-2.00, | <0.001 | (5.47,  | (3.31,  | (-2.06, | <0.001 |
| State of)         | 16.61)  | 15.54)  | -0.03)  |        | 116.67)  | 117.51)  | 0.11)   |        | 415.99)   | 247.56)  | -1.51)  |        | 8.74)   | 5.00)   | -1.57)  |        |
|                   | 31.72   | 29.03   | -0.30   |        | 239.86   | 226.78   | -0.19   |        | 601.87    | 297.95   | -2.69   |        | 10.77   | 5.22    | -2.77   |        |
| Bosnia and        | (28.35, | (24.74, | (-0.31, | <0.001 | (230.42, | (214.67, | (-0.22, | <0.001 | (586.85,  | (283.96, | (-3.19, | <0.001 | (8.84,  | (3.53,  | (-3.27, | <0.001 |
| Herzegovina       | 35.39)  | 33.89)  | -0.29)  |        | 249.60)  | 239.45)  | -0.17)  |        | 617.19)   | 312.50)  | -2.18)  |        | 13.00)  | 7.53)   | -2.26)  |        |
|                   | 37.41   | 39.17   | 0.16    |        | 177.00   | 193.68   | 0.31    |        | 307.58    | 301.10   | 0.01    |        | 5.50    | 5.37    | 0.00    |        |
| Botswana          | (29.33, | (34.06, | (0.13,  | <0.001 | (158.23, | (182.20, | (0.30,  | <0.001 | (282.75,  | (286.72, | (-0.36, | 0.959  | (2.64,  | (3.61,  | (-0.37, | 0.989  |
|                   | 47.13)  | 44.85)  | 0.19)   |        | 197.45)  | 205.71)  | 0.32)   |        | 334.06)   | 316.04)  | 0.38)   |        | 10.20)  | 7.72)   | 0.38)   |        |
|                   | 23.41   | 20.51   | -0.45   |        | 177.12   | 175.63   | -0.03   |        | 611.23    | 339.78   | -2.00   |        | 10.94   | 5.91    | -2.11   |        |
| Brazil            | (22.85, | (20.09, | (-0.50, | <0.001 | (175.55, | (174.42, | (-0.06, | 0.024  | (608.31,  | (338.07, | (-2.24, | <0.001 | (10.55, | (5.69,  | (-2.36, | <0.001 |
|                   | 23.97)  | 20.93)  | -0.40)  |        | 178.71)  | 176.85)  | -0.00)  |        | 614.15)   | 341.49)  | -1.77)  |        | 11.34)  | 6.14)   | -1.86)  |        |
|                   | 31.19   | 29.17   | -0.23   |        | 155.16   | 150.08   | -0.08   |        | 982.64    | 522.84   | -2.25   |        | 16.83   | 9.26    | -2.14   |        |
| Brunei Darussalam | (19.29, | (20.19, | (-0.25, | <0.001 | (126.70, | (128.87, | (-0.23, | 0.332  | (908.66,  | (482.20, | (-2.88, | <0.001 | (8.46,  | (4.61,  | (-2.77, | <0.001 |
|                   | 48.09)  | 41.17)  | -0.21)  |        | 188.39)  | 174.13)  | 0.08)   |        | 1061.30)  | 566.31)  | -1.62)  |        | 30.38)  | 17.12)  | -1.51)  |        |
|                   | 28.42   | 27.74   | -0.08   |        | 199.25   | 201.30   | 0.04    |        | 1081.30   | 719.27   | -1.31   |        | 19.35   | 12.87   | -1.30   |        |
| Bulgaria          | (25.84, | (24.77, | (-0.12, | <0.001 | (192.38, | (193.47, | (0.02,  | 0.003  | (1065.15, | (704.20, | (-1.60, | <0.001 | (17.24, | (10.94, | (-1.60, | <0.001 |
|                   | 31.21)  | 31.01)  | -0.05)  |        | 206.30)  | 209.43)  | 0.07)   |        | 1097.65)  | 734.64)  | -1.02)  |        | 21.64)  | 15.11)  | -1.00)  |        |
|                   | 29.80   | 30.61   | 0.09    |        | 174.45   | 180.08   | 0.13    |        | 285.42    | 333.37   | 0.64    |        | 5.06    | 5.90    | 0.63    |        |
| Burkina Faso      | (26.73, | (28.79, | (0.09,  | <0.001 | (166.67, | (175.50, | (0.07,  | <0.001 | (275.56,  | (327.21, | (0.30,  | <0.001 | (3.82,  | (5.10,  | (0.28,  | <0.001 |
|                   | 33.14)  | 32.52)  | 0.10)   |        | 182.51)  | 184.75)  | 0.19)   |        | 295.56)   | 339.63)  | 0.98)   |        | 6.60)   | 6.79)   | 0.98)   |        |
|                   | 34.27   | 35.45   | 0.11    |        | 194.24   | 200.51   | 0.12    |        | 465.70    | 402.07   | -0.55   |        | 8.18    | 7.01    | -0.57   |        |
| Burundi           | (30.54, | (32.91, | (0.10,  | <0.001 | (184.94, | (194.30, | (0.05,  | 0.001  | (451.44,  | (393.40, | (-0.87, | 0.001  | (6.37,  | (5.90,  | (-0.89, | <0.001 |
|                   | 38.35)  | 38.13)  | 0.13)   |        | 203.90)  | 206.87)  | 0.19)   |        | 480.30)   | 410.90)  | -0.23)  |        | 10.35)  | 8.27)   | -0.26)  |        |
|                   | 31.35   | 33.51   | 0.23    |        | 191.93   | 208.41   | 0.29    |        | 402.31    | 238.73   | -1.96   |        | 7.25    | 4.13    | -2.09   |        |
| Cabo Verde        | (16.98, | (24.37, | (0.21,  | <0.001 | (150.47, | (184.49, | (0.28,  | <0.001 | (340.60,  | (212.91, | (-2.33, | <0.001 | (1.30,  | (1.41,  | (-2.51, | <0.001 |
|                   | 54.65)  | 45.08)  | 0.24)   |        | 242.16)  | 234.69)  | 0.31)   |        | 472.71)   | 266.93)  | -1.59)  |        | 23.87)  | 9.57)   | -1.65)  |        |
| Cambodia          | 30.84   | 28.19   | -0.31   | <0.001 | 186.89   | 171.93   | -0.28   | <0.001 | 545.87    | 420.08   | -0.90   | <0.001 | 9.66    | 7.35    | -0.94   | <0.001 |

|                 |         |         |         |        |          |          |         |        |          |          |         |        |         |         |         |        |
|-----------------|---------|---------|---------|--------|----------|----------|---------|--------|----------|----------|---------|--------|---------|---------|---------|--------|
|                 | (28.04, | (26.46, | (-0.35, |        | (179.66, | (167.58, | (-0.32, |        | (533.71, | (413.30, | (-1.03, |        | (8.09,  | (6.48,  | (-1.07, |        |
|                 | 33.87)  | 30.01)  | -0.27)  |        | 194.34)  | 176.38)  | -0.24)  |        | 558.26)  | 426.94)  | -0.76)  |        | 11.46)  | 8.32)   | -0.80)  |        |
|                 | 27.57   | 31.00   | 0.41    |        | 148.20   | 168.62   | 0.46    |        | 200.92   | 300.25   | 1.40    |        | 3.52    | 5.28    | 1.41    |        |
| Cameroon        | (25.01, | (29.51, | (0.39,  | <0.001 | (141.99, | (165.03, | (0.41,  | <0.001 | (193.80, | (295.52, | (1.25,  | <0.001 | (2.63,  | (4.66,  | (1.26,  | <0.001 |
|                 | 30.34)  | 32.55)  | 0.44)   |        | 154.61)  | 172.27)  | 0.50)   |        | 208.24)  | 305.04)  | 1.55)   |        | 4.63)   | 5.95)   | 1.57)   |        |
|                 | 47.90   | 35.65   | -1.02   |        | 202.53   | 165.36   | -0.71   |        | 264.91   | 132.71   | -2.34   |        | 4.69    | 2.33    | -2.37   |        |
| Canada          | (46.17, | (34.18, | (-1.04, | <0.001 | (198.99, | (162.21, | (-0.73, | <0.001 | (260.84, | (129.89, | (-2.79, | <0.001 | (4.16,  | (1.97,  | (-2.86, | <0.001 |
|                 | 49.68)  | 37.18)  | -0.99)  |        | 206.13)  | 168.57)  | -0.68)  |        | 269.03)  | 135.59)  | -1.90)  |        | 5.27)   | 2.74)   | -1.88)  |        |
| Central African | 37.15   | 38.01   | 0.07    |        | 156.26   | 160.75   | 0.12    |        | 532.76   | 533.37   | -0.01   |        | 9.40    | 9.44    | 0.01    |        |
| Republic        | (31.65, | (34.00, | (0.05,  | <0.001 | (144.35, | (152.19, | (0.02,  | 0.015  | (510.94, | (517.95, | (-0.31, | 0.974  | (6.68,  | (7.48,  | (-0.29, | 0.970  |
|                 | 43.38)  | 42.37)  | 0.09)   |        | 168.94)  | 169.67)  | 0.21)   |        | 555.31)  | 549.14)  | 0.30)   |        | 12.91)  | 11.77)  | 0.31)   |        |
|                 | 29.78   | 32.78   | 0.33    |        | 173.10   | 193.33   | 0.40    |        | 239.19   | 300.49   | 0.99    |        | 4.19    | 5.26    | 0.98    |        |
| Chad            | (26.18, | (30.42, | (0.31,  | <0.001 | (163.97, | (187.29, | (0.34,  | <0.001 | (228.64, | (293.13, | (0.83,  | <0.001 | (2.89,  | (4.32,  | (0.82,  | <0.001 |
|                 | 33.77)  | 35.29)  | 0.36)   |        | 182.61)  | 199.51)  | 0.45)   |        | 250.12)  | 307.99)  | 1.16)   |        | 5.89)   | 6.35)   | 1.15)   |        |
|                 | 24.65   | 23.44   | -0.17   |        | 126.95   | 125.21   | -0.05   |        | 183.41   | 153.38   | -0.63   |        | 3.25    | 2.72    | -0.63   |        |
| Chile           | (22.79, | (21.88, | (-0.20, | <0.001 | (122.65, | (121.57, | (-0.06, | <0.001 | (178.25, | (149.34, | (-1.03, | 0.002  | (2.59,  | (2.21,  | (-0.99, | 0.001  |
|                 | 26.62)  | 25.09)  | -0.15)  |        | 131.37)  | 128.93)  | -0.03)  |        | 188.69)  | 157.50)  | -0.24)  |        | 4.03)   | 3.32)   | -0.27)  |        |
|                 | 23.65   | 22.30   | -0.19   |        | 232.39   | 230.16   | -0.03   |        | 446.10   | 453.03   | 0.13    |        | 7.65    | 7.83    | 0.15    |        |
| China           | (23.47, | (22.13, | (-0.27, | <0.001 | (231.80, | (229.61, | (-0.09, | 0.260  | (445.30, | (452.24, | (-0.63, | 0.744  | (7.54,  | (7.73,  | (-0.62, | 0.701  |
|                 | 23.84)  | 22.48)  | -0.12)  |        | 232.97)  | 230.71)  | 0.02)   |        | 446.90)  | 453.83)  | 0.89)   |        | 7.75)   | 7.94)   | 0.94)   |        |
|                 | 29.39   | 27.12   | -0.27   |        | 145.52   | 143.05   | -0.06   |        | 445.17   | 245.54   | -2.18   |        | 7.77    | 4.25    | -2.20   |        |
| Colombia        | (28.06, | (26.08, | (-0.29, | <0.001 | (142.48, | (140.64, | (-0.08, | <0.001 | (439.92, | (242.39, | (-2.58, | <0.001 | (7.09,  | (3.85,  | (-2.61, | <0.001 |
|                 | 30.77)  | 28.19)  | -0.26)  |        | 148.62)  | 145.49)  | -0.04)  |        | 450.47)  | 248.72)  | -1.78)  |        | 8.51)   | 4.69)   | -1.79)  |        |
|                 | 34.23   | 34.36   | 0.01    |        | 222.67   | 223.60   | 0.02    |        | 305.87   | 310.48   | -0.47   |        | 5.36    | 5.41    | -0.48   |        |
| Comoros         | (21.65, | (25.36, | (0.01,  | <0.001 | (186.88, | (199.18, | (-0.00, | 0.078  | (264.40, | (281.83, | (-2.67, | 0.682  | (1.24,  | (2.25,  | (-2.59, | 0.656  |
|                 | 51.91)  | 45.59)  | 0.02)   |        | 263.53)  | 250.22)  | 0.04)   |        | 352.28)  | 341.31)  | 1.79)   |        | 15.33)  | 10.99)  | 1.66)   |        |
|                 | 37.49   | 36.98   | -0.05   |        | 176.63   | 175.90   | -0.01   |        | 660.26   | 332.17   | -2.35   |        | 11.74   | 5.85    | -2.38   |        |
| Congo           | (31.61, | (33.27, | (-0.07, | <0.001 | (163.07, | (167.68, | (-0.06, | 0.849  | (634.20, | (320.89, | (-3.03, | <0.001 | (8.47,  | (4.44,  | (-3.05, | <0.001 |
|                 | 44.22)  | 40.99)  | -0.04)  |        | 191.05)  | 184.42)  | 0.05)   |        | 687.17)  | 343.74)  | -1.66)  |        | 15.90)  | 7.58)   | -1.70)  |        |
|                 | 29.55   | 30.22   | 0.07    |        | 243.05   | 256.57   | 0.18    |        | 859.02   | 833.18   | -0.10   |        | 15.45   | 14.97   | -0.11   |        |
| Cook Islands    | (0.89,  | (0.35,  | (0.05,  | <0.001 | (108.27, | (101.24, | (0.13,  | <0.001 | (579.54, | (522.08, | (-0.34, | 0.387  | (0.02,  | (0.00,  | (-0.35, | 0.373  |
|                 | 172.38) | 200.66) | 0.09)   |        | 477.04)  | 536.75)  | 0.22)   |        | 1232.29) | 1263.18) | 0.13)   |        | 149.22) | 173.18) | 0.13)   |        |
| Costa Rica      | 28.95   | 27.96   | -0.11   | <0.001 | 161.23   | 168.64   | 0.15    | <0.001 | 333.33   | 227.65   | -1.21   | 0.033  | 5.91    | 3.99    | -1.25   | 0.032  |

|                   |         |         |         |        |          |          |         |        |          |          |         |        |         |         |         |        |
|-------------------|---------|---------|---------|--------|----------|----------|---------|--------|----------|----------|---------|--------|---------|---------|---------|--------|
|                   | (24.79, | (24.70, | (-0.13, |        | (150.96, | (160.51, | (0.12,  |        | (318.58, | (218.18, | (-2.31, |        | (4.08,  | (2.83,  | (-2.39, |        |
|                   | 33.64)  | 31.54)  | -0.09)  |        | 172.04)  | 177.09)  | 0.18)   |        | 348.60)  | 237.44)  | -0.10)  |        | 8.29)   | 5.50)   | -0.11)  |        |
|                   | 33.95   | 36.37   | 0.23    |        | 188.39   | 201.05   | 0.24    |        | 361.19   | 317.47   | -0.45   |        | 6.38    | 5.59    | -0.46   |        |
| Cote d'Ivoire     | (31.52, | (34.73, | (0.22,  | <0.001 | (182.42, | (197.14, | (0.20,  | <0.001 | (352.98, | (312.59, | (-0.71, | 0.001  | (5.32,  | (4.96,  | (-0.73, | 0.001  |
|                   | 36.54)  | 38.06)  | 0.25)   |        | 194.52)  | 205.02)  | 0.29)   |        | 369.55)  | 322.40)  | -0.20)  |        | 7.60)   | 6.28)   | -0.18)  |        |
|                   | 28.52   | 24.18   | -0.56   |        | 247.88   | 211.39   | -0.54   |        | 603.28   | 198.30   | -3.66   |        | 10.76   | 3.50    | -3.75   |        |
| Croatia           | (25.30, | (20.74, | (-0.58, | <0.001 | (238.34, | (201.18, | (-0.60, | <0.001 | (588.29, | (188.44, | (-4.43, | <0.001 | (8.84,  | (2.31,  | (-4.83, | <0.001 |
|                   | 32.08)  | 28.11)  | -0.53)  |        | 257.74)  | 222.06)  | -0.47)  |        | 618.60)  | 208.61)  | -2.89)  |        | 13.00)  | 5.20)   | -2.66)  |        |
|                   | 61.84   | 59.04   | -0.15   |        | 330.63   | 307.24   | -0.27   |        | 525.41   | 234.65   | -2.72   |        | 9.35    | 4.14    | -2.81   |        |
| Cuba              | (58.60, | (55.67, | (-0.19, | <0.001 | (322.86, | (299.51, | (-0.35, | <0.001 | (515.65, | (227.90, | (-3.17, | <0.001 | (8.08,  | (3.29,  | (-3.28, | <0.001 |
|                   | 65.21)  | 62.57)  | -0.11)  |        | 338.54)  | 315.13)  | -0.18)  |        | 535.31)  | 241.57)  | -2.27)  |        | 10.77)  | 5.17)   | -2.34)  |        |
|                   | 23.66   | 21.76   | -0.29   |        | 141.28   | 154.49   | 0.40    |        | 428.17   | 287.48   | -1.44   |        | 7.62    | 5.10    | -1.42   |        |
| Cyprus            | (16.74, | (16.69, | (-0.30, | <0.001 | (123.45, | (140.76, | (0.09,  | 0.012  | (396.63, | (268.49, | (-2.00, | <0.001 | (3.96,  | (2.88,  | (-1.97, | <0.001 |
|                   | 32.58)  | 28.29)  | -0.28)  |        | 161.03)  | 169.55)  | 0.72)   |        | 461.62)  | 307.81)  | -0.88)  |        | 13.39)  | 8.94)   | -0.85)  |        |
|                   | 46.23   | 40.41   | -0.46   |        | 286.84   | 247.86   | -0.51   |        | 589.32   | 139.73   | -4.80   |        | 10.68   | 2.44    | -4.93   |        |
| Czechia           | (43.26, | (37.49, | (-0.48, | <0.001 | (279.51, | (240.83, | (-0.59, | <0.001 | (578.87, | (134.48, | (-5.43, | <0.001 | (9.32,  | (1.79,  | (-5.58, | <0.001 |
|                   | 49.37)  | 43.53)  | -0.44)  |        | 294.33)  | 255.09)  | -0.44)  |        | 599.92)  | 145.17)  | -4.17)  |        | 12.20)  | 3.29)   | -4.27)  |        |
| Democratic        | 21.99   | 22.29   | 0.04    |        | 201.85   | 209.83   | 0.13    |        | 717.74   | 765.89   | 0.23    |        | 12.37   | 13.13   | 0.21    |        |
| People's Republic | (20.52, | (21.07, | (0.03,  | <0.001 | (197.28, | (206.10, | (0.09,  | <0.001 | (709.22, | (758.61, | (0.12,  | <0.001 | (11.27, | (12.19, | (0.10,  | <0.001 |
| of Korea          | 23.54)  | 23.56)  | 0.06)   |        | 206.50)  | 213.62)  | 0.17)   |        | 726.35)  | 773.23)  | 0.34)   |        | 13.56)  | 14.12)  | 0.32)   |        |
| Democratic        | 35.02   | 34.28   | -0.07   |        | 162.74   | 160.45   | -0.05   |        | 366.38   | 314.37   | -0.50   |        | 6.47    | 5.55    | -0.50   |        |
| Republic of the   | (33.54, | (33.36, | (-0.08, | <0.001 | (159.41, | (158.39, | (-0.08, | 0.012  | (361.46, | (311.52, | (-0.60, | <0.001 | (5.83,  | (5.18,  | (-0.61, | <0.001 |
| Congo             | 36.56)  | 35.22)  | -0.06)  |        | 166.12)  | 162.53)  | -0.01)  |        | 371.35)  | 317.23)  | -0.40)  |        | 7.17)   | 5.95)   | -0.40)  |        |
|                   | 46.82   | 34.13   | -1.09   |        | 225.50   | 177.51   | -0.82   |        | 251.62   | 53.93    | -5.21   |        | 4.54    | 0.95    | -5.27   |        |
| Denmark           | (42.70, | (30.50, | (-1.11, | <0.001 | (216.37, | (169.08, | (-0.83, | <0.001 | (242.00, | (49.33,  | (-6.21, | <0.001 | (3.34,  | (0.43,  | (-6.33, | <0.001 |
|                   | 51.25)  | 38.09)  | -1.06)  |        | 234.92)  | 186.27)  | -0.81)  |        | 261.55)  | 58.87)   | -4.19)  |        | 6.08)   | 1.84)   | -4.20)  |        |
|                   | 32.07   | 34.55   | 0.25    |        | 199.83   | 218.44   | 0.31    |        | 301.17   | 376.14   | 0.74    |        | 5.27    | 6.53    | 0.72    |        |
| Djibouti          | (21.48, | (27.77, | (0.23,  | <0.001 | (170.65, | (200.77, | (0.27,  | <0.001 | (265.77, | (352.90, | (0.51,  | <0.001 | (1.58,  | (3.80,  | (0.49,  | <0.001 |
|                   | 46.37)  | 42.49)  | 0.28)   |        | 232.71)  | 237.25)  | 0.35)   |        | 340.17)  | 400.52)  | 0.97)   |        | 13.15)  | 10.48)  | 0.94)   |        |
|                   | 65.03   | 66.86   | 0.10    |        | 318.99   | 326.61   | 0.08    |        | 298.17   | 181.53   | -1.75   |        | 5.28    | 3.18    | -1.76   |        |
| Dominica          | (29.31, | (30.15, | (0.02,  | 0.014  | (228.40, | (235.87, | (0.06,  | <0.001 | (211.29, | (115.84, | (-2.31, | <0.001 | (0.03,  | (0.00,  | (-2.42, | <0.001 |
|                   | 126.50) | 128.34) | 0.18)   |        | 434.43)  | 440.88)  | 0.09)   |        | 409.77)  | 271.14)  | -1.19)  |        | 41.20)  | 35.05)  | -1.11)  |        |
| Dominican         | 59.99   | 65.75   | 0.32    | <0.001 | 280.42   | 316.05   | 0.41    | <0.001 | 716.74   | 830.21   | 0.60    | 0.058  | 12.47   | 14.63   | 0.64    | 0.043  |

|                   |         |         |         |        |          |          |         |        |          |          |         |        |         |         |         |        |
|-------------------|---------|---------|---------|--------|----------|----------|---------|--------|----------|----------|---------|--------|---------|---------|---------|--------|
| Republic          | (55.81, | (62.45, | (0.30,  |        | (270.99, | (308.70, | (0.37,  |        | (702.04, | (818.30, | (-0.02, |        | (10.59, | (13.08, | (0.02,  |        |
|                   | 64.40)  | 69.19)  | 0.34)   |        | 290.10)  | 323.54)  | 0.44)   |        | 731.68)  | 842.25)  | 1.22)   |        | 14.61)  | 16.31)  | 1.27)   |        |
|                   | 14.06   | 14.45   | 0.10    |        | 107.58   | 118.28   | 0.33    |        | 518.14   | 482.77   | -0.33   |        | 8.94    | 8.25    | -0.36   |        |
| Ecuador           | (12.39, | (13.21, | (0.08,  | <0.001 | (102.71, | (114.64, | (0.31,  | <0.001 | (507.69, | (475.49, | (-0.85, | 0.209  | (7.61,  | (7.32,  | (-0.88, | 0.177  |
|                   | 15.90)  | 15.77)  | 0.13)   |        | 112.62)  | 122.01)  | 0.35)   |        | 528.74)  | 490.13)  | 0.19)   |        | 10.45)  | 9.27)   | 0.16)   |        |
| Egypt             |         |         |         |        |          |          |         |        | 1679.95  | 1236.04  |         |        |         |         |         |        |
|                   | 45.17   | 45.03   | -0.01   |        | 302.69   | 314.37   | 0.15    |        | (1671.95 | (1231.26 | -1.05   |        | 29.36   | 21.23   | -1.11   |        |
|                   | (43.86, | (44.12, | (-0.07, | 0.841  | (299.23, | (311.95, | (0.02,  | 0.029  | ,        | ,        | (-1.54, | <0.001 | (28.30, | (20.60, | (-1.60, | <0.001 |
| El Salvador       | 46.51)  | 45.96)  | 0.06)   |        | 306.19)  | 316.80)  | 0.29)   |        | 1687.99) | 1240.83) | -0.56)  |        | 30.44)  | 21.87)  | -0.62)  |        |
|                   | 25.80   | 27.56   | 0.23    |        | 113.82   | 135.86   | 0.61    |        | 944.54   | 503.62   | -2.04   |        | 16.15   | 8.77    | -1.98   |        |
|                   | (22.46, | (24.54, | (0.21,  | <0.001 | (106.43, | (128.86, | (0.59,  | <0.001 | (924.07, | (490.35, | (-3.68, | 0.017  | (13.55, | (7.09,  | (-3.62, | 0.020  |
| Equatorial Guinea | 29.52)  | 30.86)  | 0.25)   |        | 121.59)  | 143.16)  | 0.63)   |        | 965.37)  | 517.16)  | -0.37)  |        | 19.13)  | 10.75)  | -0.31)  |        |
|                   | 36.53   | 32.31   | -0.43   |        | 167.89   | 156.86   | -0.23   |        | 532.96   | 207.46   | -3.20   |        | 9.42    | 3.60    | -3.26   |        |
|                   | (22.56, | (26.04, | (-0.44, | <0.001 | (135.30, | (141.96, | (-0.24, | <0.001 | (474.72, | (190.82, | (-3.90, | <0.001 | (3.18,  | (1.71,  | (-3.98, | <0.001 |
| Eritrea           | 56.31)  | 39.75)  | -0.41)  |        | 206.18)  | 172.98)  | -0.21)  |        | 596.66)  | 225.28)  | -2.48)  |        | 21.92)  | 6.84)   | -2.52)  |        |
|                   | 31.44   | 31.14   | -0.04   |        | 171.75   | 170.32   | -0.02   |        | 407.63   | 486.04   | 0.57    |        | 7.19    | 8.55    | 0.57    |        |
|                   | (26.62, | (28.18, | (-0.05, | <0.001 | (159.80, | (163.10, | (-0.08, | 0.550  | (389.42, | (473.99, | (0.14,  | 0.009  | (4.94,  | (7.01,  | (0.14,  | 0.010  |
| Estonia           | 36.92)  | 34.34)  | -0.02)  |        | 184.40)  | 177.79)  | 0.04)   |        | 426.50)  | 498.33)  | 1.01)   |        | 10.16)  | 10.34)  | 1.00)   |        |
|                   | 62.13   | 56.35   | -0.35   |        | 268.27   | 245.24   | -0.34   |        | 845.00   | 169.86   | -5.72   |        | 15.46   | 3.02    | -5.84   |        |
|                   | (53.54, | (47.16, | (-0.40, | <0.001 | (250.25, | (226.16, | (-0.51, | <0.001 | (812.83, | (154.08, | (-6.56, | <0.001 | (11.38, | (1.27,  | (-6.68, | <0.001 |
| Eswatini          | 71.76)  | 67.14)  | -0.30)  |        | 287.32)  | 265.84)  | -0.18)  |        | 878.17)  | 187.15)  | -4.87)  |        | 20.59)  | 6.66)   | -4.99)  |        |
|                   | 38.30   | 40.68   | 0.21    |        | 185.06   | 202.71   | 0.32    |        | 204.37   | 369.28   | 1.97    |        | 3.62    | 6.60    | 2.01    |        |
|                   | (27.43, | (32.75, | (0.19,  | <0.001 | (159.17, | (184.11, | (0.30,  | <0.001 | (177.31, | (344.07, | (1.49,  | <0.001 | (0.89,  | (3.62,  | (1.49,  | <0.001 |
| Ethiopia          | 52.26)  | 50.00)  | 0.23)   |        | 214.05)  | 222.71)  | 0.33)   |        | 234.50)  | 395.87)  | 2.45)   |        | 9.92)   | 11.09)  | 2.53)   |        |
|                   | 27.46   | 30.62   | 0.38    |        | 148.52   | 172.55   | 0.53    |        | 442.29   | 256.28   | -1.87   |        | 7.73    | 4.43    | -1.91   |        |
|                   | (26.28, | (29.82, | (0.36,  | <0.001 | (145.68, | (170.58, | (0.50,  | <0.001 | (437.52, | (253.94, | (-2.00, | <0.001 | (7.10,  | (4.13,  | (-2.04, | <0.001 |
| Fiji              | 28.68)  | 31.44)  | 0.39)   |        | 151.40)  | 174.54)  | 0.55)   |        | 447.10)  | 258.63)  | -1.73)  |        | 8.39)   | 4.75)   | -1.77)  |        |
|                   | 32.51   | 32.64   | 0.01    |        | 266.08   | 275.27   | 0.12    |        | 1906.58  | 1461.29  |         |        |         |         |         |        |
|                   | (24.07, | (24.95, | (0.00,  | 0.027  | (240.31, | (252.05, | (0.09,  | <0.001 | (1836.43 | (1407.11 | -0.97   |        | 34.54   | 26.26   | -0.99   |        |
| Finland           | 43.06)  | 41.98)  | 0.02)   |        | 293.92)  | 300.09)  | 0.14)   |        | ,        | ,        | (-1.62, | 0.004  | (25.65, | (19.46, | (-1.66, | 0.004  |
|                   | 49.15   | 37.34   | -0.95   |        | 232.48   | 187.24   | -0.74   |        | 387.44   | 97.97    | -4.68   |        | 7.06    | 1.75    | -4.74   |        |
|                   | (44.93, | (33.51, | (-0.99, | <0.001 | (223.38, | (178.69, | (-0.77, | <0.001 | (375.76, | (91.86,  | (-5.38, | <0.001 | (5.57,  | (1.02,  | (-5.47, | <0.001 |

|           |         |         |         |        |          |          |         |        |           |           |         |        |         |         |         |        |
|-----------|---------|---------|---------|--------|----------|----------|---------|--------|-----------|-----------|---------|--------|---------|---------|---------|--------|
|           | 53.71)  | 41.53)  | -0.92)  |        | 241.91)  | 196.14)  | -0.70)  |        | 399.43)   | 104.43)   | -3.97)  |        | 8.89)   | 2.86)   | -4.01)  |        |
|           | 33.96)  | 29.26)  | -0.51)  |        | 170.83)  | 162.39)  | -0.16)  |        | 232.14)   | 103.39)   | -2.84)  |        | 4.18)   | 1.83)   | -2.91)  |        |
| France    | (32.91, | (28.22, | (-0.53, | <0.001 | (168.47, | (159.97, | (-0.23, | <0.001 | (229.39,  | (101.46,  | (-3.55, | <0.001 | (3.82,  | (1.58,  | (-3.64, | <0.001 |
|           | 35.05)  | 30.33)  | -0.50)  |        | 173.22)  | 164.85)  | -0.10)  |        | 234.91)   | 105.35)   | -2.13)  |        | 4.57)   | 2.11)   | -2.17)  |        |
|           | 33.53)  | 33.91)  | 0.04)   |        | 160.81)  | 167.19)  | 0.13)   |        | 473.20)   | 337.41)   | -1.14)  |        | 8.35)   | 5.92)   | -1.16)  |        |
| Gabon     | (25.56, | (27.93, | (0.02,  | <0.001 | (142.34, | (153.32, | (0.11,  | <0.001 | (441.47,  | (317.79,  | (-1.76, | <0.001 | (4.61,  | (3.57,  | (-1.77, | <0.001 |
|           | 43.27)  | 40.83)  | 0.06)   |        | 181.04)  | 181.99)  | 0.16)   |        | 506.65)   | 357.95)   | -0.53)  |        | 13.97)  | 9.25)   | -0.55)  |        |
|           | 35.41)  | 38.78)  | 0.31)   |        | 214.61)  | 235.43)  | 0.34)   |        | 271.27)   | 321.00)   | 0.65)   |        | 4.78)   | 5.61)   | 0.62)   |        |
| Gambia    | (26.66, | (32.83, | (0.30,  | <0.001 | (191.34, | (219.95, | (0.26,  | <0.001 | (245.30,  | (303.19,  | (-0.50, | 0.271  | (1.91,  | (3.47,  | (-0.53, | 0.292  |
|           | 46.29)  | 45.55)  | 0.33)   |        | 240.02)  | 251.75)  | 0.42)   |        | 299.35)   | 339.62)   | 1.81)   |        | 10.05)  | 8.63)   | 1.79)   |        |
|           | 43.88)  | 45.78)  | 0.16)   |        | 233.38)  | 251.46)  | 0.26)   |        | 1682.76)  | 876.54)   | -2.10)  |        | 30.40)  | 15.80)  | -2.25)  |        |
| Georgia   | (39.97, | (40.76, | (0.11,  | <0.001 | (224.23, | (239.65, | (0.24,  | <0.001 | (1658.00) | (854.29,  | (-3.51, | 0.004  | (27.15, | (12.94, | (-3.76, | 0.004  |
|           | 48.08)  | 51.31)  | 0.21)   |        | 242.82)  | 263.77)  | 0.28)   |        | '         | 899.28)   | -0.68)  |        | 33.94)  | 19.17)  | -0.73)  |        |
|           | 48.24)  | 38.00)  | -0.83)  |        | 226.28)  | 199.16)  | -0.42)  |        | 1707.80)  | 120.65)   | -4.59)  |        | 8.18)   | 2.13)   | -4.61)  |        |
| Germany   | (47.18, | (37.00, | (-0.86, | <0.001 | (223.98, | (196.91, | (-0.54, | <0.001 | 459.48)   | (118.89,  | (-4.91, | <0.001 | (7.74,  | (1.90,  | (-4.94, | <0.001 |
|           | 49.32)  | 39.02)  | -0.80)  |        | 228.61)  | 201.43)  | -0.31)  |        | 462.81)   | 122.44)   | -4.27)  |        | 8.64)   | 2.38)   | -4.29)  |        |
|           | 33.17)  | 35.05)  | 0.18)   |        | 181.72)  | 193.95)  | 0.25)   |        | 245.94)   | 262.24)   | 0.22)   |        | 4.33)   | 4.61)   | 0.21)   |        |
| Ghana     | (30.92, | (33.56, | (0.11,  | <0.001 | (176.25, | (190.35, | (0.19,  | <0.001 | (239.66,  | (258.10,  | (-0.03, | 0.078  | (3.53,  | (4.07,  | (-0.11, | 0.192  |
|           | 35.56)  | 36.58)  | 0.26)   |        | 187.31)  | 197.60)  | 0.31)   |        | 252.35)   | 266.44)   | 0.47)   |        | 5.27)   | 5.20)   | 0.52)   |        |
|           | 32.00)  | 29.51)  | -0.28)  |        | 152.46)  | 158.04)  | 0.14)   |        | 535.46)   | 411.18)   | -1.00)  |        | 9.51)   | 7.37)   | -0.96)  |        |
| Greece    | (29.51, | (26.89, | (-0.29, | <0.001 | (146.98, | (152.12, | (0.04,  | 0.009  | (525.15,  | (401.57,  | (-1.56, | 0.001  | (8.18,  | (6.15,  | (-1.52, | 0.001  |
|           | 34.64)  | 32.33)  | -0.27)  |        | 158.08)  | 164.15)  | 0.25)   |        | 545.92)   | 420.99)   | -0.43)  |        | 11.00)  | 8.81)   | -0.39)  |        |
|           | 48.84)  | 38.03)  | -0.86)  |        | 175.33)  | 152.21)  | -0.49)  |        | 317.41)   | 117.63)   | -3.37)  |        | 5.77)   | 2.13)   | -3.38)  |        |
| Greenland | (20.16, | (10.74, | (-0.88, | <0.001 | (114.58, | (88.25,  | (-0.51, | <0.001 | (232.77,  | (62.40,   | (-3.67, | <0.001 | (0.08,  | (0.00,  | (-3.70, | <0.001 |
|           | 108.47) | 102.50) | -0.84)  |        | 263.91)  | 249.68)  | -0.46)  |        | 429.08)   | 206.98)   | -3.06)  |        | 50.16)  | 48.85)  | -3.06)  |        |
|           | 67.32)  | 70.57)  | 0.16)   |        | 347.93)  | 368.09)  | 0.20)   |        | 617.73)   | 214.46)   | -3.72)  |        | 11.13)  | 3.77)   | -3.82)  |        |
| Grenada   | (32.60, | (38.76, | (0.14,  | <0.001 | (258.42, | (287.20, | (0.19,  | <0.001 | (495.96,  | (153.91,  | (-4.75, | <0.001 | (0.90,  | (0.03,  | (-4.90, | <0.001 |
|           | 124.76) | 119.13) | 0.18)   |        | 459.33)  | 465.27)  | 0.20)   |        | 761.16)   | 291.52)   | -2.69)  |        | 47.55)  | 27.95)  | -2.73)  |        |
|           | 26.04)  | 29.73)  | 0.45)   |        | 209.46)  | 255.09)  | 0.67)   |        | 590.95)   | 1274.75)  | 2.66)   |        | 10.50)  | 23.02)  | 2.72)   |        |
| Guam      | (11.79, | (13.60, | (0.37,  | <0.001 | (163.05, | (200.73, | (0.63,  | <0.001 | (511.21,  | (1149.12) | (1.98,  | <0.001 | (2.52,  | (9.07,  | (1.95,  | <0.001 |
|           | 50.37)  | 56.85)  | 0.53)   |        | 265.33)  | 319.85)  | 0.70)   |        | 679.96)   | '         | 3.36)   |        | 29.27)  | 48.29)  | 3.50)   |        |
|           |         |         |         |        |          |          |         |        |           | 1410.55)  |         |        |         |         |         |        |

|               |         |         |         |        |          |          |         |        |          |          |         |        |         |         |         |        |
|---------------|---------|---------|---------|--------|----------|----------|---------|--------|----------|----------|---------|--------|---------|---------|---------|--------|
|               | 23.73   | 26.45   | 0.38    |        | 100.04   | 124.73   | 0.77    |        | 984.52   | 519.56   | -2.18   |        | 16.83   | 9.03    | -2.12   |        |
| Guatemala     | (21.08, | (24.76, | (0.36,  | <0.001 | (94.38,  | (120.91, | (0.72,  | <0.001 | (967.29, | (511.95, | (-2.64, | <0.001 | (14.63, | (8.05,  | (-2.60, | <0.001 |
|               | 26.63)  | 28.24)  | 0.41)   |        | 105.94)  | 128.65)  | 0.82)   |        | 1001.98) | 527.26)  | -1.71)  |        | 19.29)  | 10.11)  | -1.64)  |        |
|               | 27.84   | 32.07   | 0.49    |        | 151.69   | 178.56   | 0.58    |        | 210.46   | 318.77   | 1.49    |        | 3.69    | 5.60    | 1.50    |        |
| Guinea        | (24.45, | (29.55, | (0.47,  | <0.001 | (143.46, | (172.34, | (0.53,  | <0.001 | (200.90, | (310.59, | (1.29,  | <0.001 | (2.51,  | (4.56,  | (1.31,  | <0.001 |
|               | 31.58)  | 34.76)  | 0.52)   |        | 160.27)  | 184.96)  | 0.64)   |        | 220.38)  | 327.12)  | 1.68)   |        | 5.23)   | 6.83)   | 1.69)   |        |
|               | 34.75   | 37.36   | 0.25    |        | 190.25   | 205.49   | 0.29    |        | 439.55   | 481.09   | 0.32    |        | 7.81    | 8.53    | 0.31    |        |
| Guinea-Bissau | (25.80, | (31.09, | (0.23,  | <0.001 | (167.66, | (189.89, | (0.18,  | <0.001 | (405.33, | (457.33, | (0.20,  | <0.001 | (3.84,  | (5.61,  | (0.18,  | <0.001 |
|               | 45.97)  | 44.60)  | 0.27)   |        | 215.12)  | 222.07)  | 0.41)   |        | 475.99)  | 505.80)  | 0.44)   |        | 14.24)  | 12.47)  | 0.43)   |        |
|               | 74.26   | 74.27   | 0.01    |        | 332.31   | 332.56   | 0.01    |        | 1000.34  | 606.78   | -1.58   |        | 17.74   | 10.82   | -1.56   |        |
| Guyana        | (61.09, | (60.93, | (-0.02, | 0.567  | (302.88, | (302.81, | (-0.02, | 0.484  | (949.40, | (566.58, | (-2.55, | 0.002  | (11.51, | (6.05,  | (-2.51, | 0.001  |
|               | 89.56)  | 89.76)  | 0.03)   |        | 363.89)  | 364.49)  | 0.04)   |        | 1053.38) | 649.13)  | -0.60)  |        | 26.23)  | 17.92)  | -0.61)  |        |
|               | 69.76   | 71.26   | 0.07    |        | 309.85   | 314.06   | 0.05    |        | 582.52   | 431.67   | -1.03   |        | 10.43   | 7.71    | -1.02   |        |
| Haiti         | (64.79, | (67.94, | (0.03,  | 0.001  | (299.11, | (306.94, | (0.04,  | <0.001 | (567.80, | (423.33, | (-1.28, | <0.001 | (8.54,  | (6.63,  | (-1.25, | <0.001 |
|               | 75.01)  | 74.70)  | 0.12)   |        | 320.89)  | 321.30)  | 0.06)   |        | 597.53)  | 440.13)  | -0.79)  |        | 12.62)  | 8.92)   | -0.78)  |        |
|               | 29.43   | 30.51   | 0.12    |        | 147.72   | 168.48   | 0.44    |        | 496.25   | 197.28   | -3.18   |        | 8.70    | 3.43    | -3.21   |        |
| Honduras      | (25.59, | (27.99, | (0.09,  | <0.001 | (138.73, | (162.32, | (0.41,  | <0.001 | (479.96, | (190.72, | (-3.43, | <0.001 | (6.66,  | (2.61,  | (-3.47, | <0.001 |
|               | 33.71)  | 33.20)  | 0.16)   |        | 157.16)  | 174.82)  | 0.48)   |        | 512.97)  | 204.02)  | -2.93)  |        | 11.20)  | 4.44)   | -2.95)  |        |
|               | 39.31   | 31.81   | -0.73   |        | 304.31   | 240.53   | -0.81   |        | 1199.14  |          |         |        | 21.82   | 4.90    | -5.07   |        |
| Hungary       | (36.59, | (29.10, | (-0.74, | <0.001 | (296.84, | (233.13, | (-0.83, | <0.001 | (1184.37 | 274.84   | -5.00   |        | 19.87,  | (3.90,  | (-5.77, | <0.001 |
|               | 42.19)  | 34.73)  | -0.72)  |        | 311.94)  | 248.14)  | -0.78)  |        | ,        | 282.93)  | -4.32)  |        | 23.92)  | 6.12)   | -4.37)  |        |
|               | 45.55   | 38.95   | -0.54   |        | 197.49   | 187.48   | -0.20   |        | 1214.06) |          |         |        | 6.33    | 2.50    | -3.19   |        |
| Iceland       | (29.38, | (25.37, | (-0.55, | <0.001 | (161.88, | (156.18, | (-0.29, | <0.001 | (316.57, | (115.15, | (-3.80, | <0.001 | (1.49,  | (0.22,  | (-3.76, | <0.001 |
|               | 67.68)  | 57.97)  | -0.52)  |        | 238.83)  | 223.87)  | -0.11)  |        | 420.90)  | 174.66)  | -2.69)  |        | 17.79)  | 11.44)  | -2.61)  |        |
|               | 29.60   | 30.56   | 0.11    |        | 162.68   | 174.91   | 0.25    |        | 956.57   | 920.95   | -0.06   |        | 16.95   | 16.43   | -0.03   |        |
| India         | (29.33, | (30.37, | (0.09,  | <0.001 | (162.05, | (174.43, | (0.22,  | <0.001 | (955.07, | (919.86, | (-0.84, | 0.882  | (16.75, | (16.29, | (-0.83, | 0.948  |
|               | 29.86)  | 30.76)  | 0.13)   |        | 163.31)  | 175.38)  | 0.28)   |        | 958.08)  | 922.05)  | 0.73)   |        | 17.15)  | 16.58)  | 0.78)   |        |
|               | 16.80   | 18.72   | 0.36    |        | 149.49   | 169.43   | 0.44    |        | 703.42   | 697.00   | -0.06   |        | 12.32   | 12.17   | -0.07   |        |
| Indonesia     | (16.37, | (18.35, | (0.27,  | <0.001 | (148.19, | (168.35, | (0.41,  | <0.001 | (700.64, | (694.78, | (-0.26, | 0.594  | (11.95, | (11.88, | (-0.28, | 0.511  |
|               | 17.24)  | 19.08)  | 0.45)   |        | 150.79)  | 170.52)  | 0.47)   |        | 706.20)  | 699.21)  | 0.15)   |        | 12.70)  | 12.46)  | 0.14)   |        |
| Iran (Islamic | 74.13   | 73.68   | -0.02   |        | 390.19   | 411.01   | 0.19    |        | 879.75   | 550.07   | -1.62   |        | 15.40   | 9.43    | -1.69   |        |
| Republic of)  | (72.40, | (72.51, | (-0.06, | 0.216  | (386.11, | (408.32, | (0.15,  | <0.001 | (873.78, | (546.78, | (-1.85, | <0.001 | (14.61, | (9.01,  | (-1.93, | <0.001 |

|            |         |         |         |        |          |          |         |        |           |           |         |        |         |         |         |        |
|------------|---------|---------|---------|--------|----------|----------|---------|--------|-----------|-----------|---------|--------|---------|---------|---------|--------|
|            | 75.89)  | 74.86)  | 0.01)   |        | 394.31)  | 413.72)  | 0.23)   |        | 885.75)   | 553.38)   | -1.38)  |        | 16.22)  | 9.87)   | -1.45)  |        |
|            | 49.59)  | 48.03)  | -0.11)  |        | 338.58)  | 334.57)  | -0.01)  |        | 854.03)   | 416.11)   | -2.41)  |        | 15.11)  | 7.29)   | -2.44)  |        |
| Iraq       | (47.03, | (46.58, | (-0.15, | <0.001 | (331.70, | (330.63, | (-0.21, | 0.915  | (843.22,  | (411.74,  | (-2.67, | <0.001 | (13.69, | (6.72,  | (-2.70, | <0.001 |
|            | 52.26)  | 49.52)  | -0.08)  |        | 345.57)  | 338.55)  | 0.19)   |        | 864.95)   | 420.51)   | -2.16)  |        | 16.64)  | 7.90)   | -2.19)  |        |
|            | 40.77)  | 32.48)  | -0.79)  |        | 210.08)  | 182.77)  | -0.46)  |        | 317.38)   | 95.39)    | -4.13)  |        | 5.76)   | 1.70)   | -4.18)  |        |
| Ireland    | (36.05, | (28.73, | (-0.82, | <0.001 | (199.20, | (173.97, | (-0.55, | <0.001 | (304.00,  | (89.15,   | (-4.94, | <0.001 | (4.09,  | (0.96,  | (-5.04, | <0.001 |
|            | 45.94)  | 36.60)  | -0.77)  |        | 221.41)  | 191.92)  | -0.37)  |        | 331.20)   | 101.99)   | -3.31)  |        | 7.90)   | 2.83)   | -3.30)  |        |
|            | 31.79)  | 27.29)  | -0.53)  |        | 172.60)  | 164.89)  | -0.15)  |        | 378.59)   | 86.97)    | -4.99)  |        | 6.70)   | 1.52)   | -5.04)  |        |
| Israel     | (28.24, | (24.82, | (-0.55, | <0.001 | (164.20, | (158.77, | (-0.19, | <0.001 | (366.10,  | (82.56,   | (-5.79, | <0.001 | (5.13,  | (0.99,  | (-5.85, | <0.001 |
|            | 35.67)  | 29.94)  | -0.50)  |        | 181.33)  | 171.19)  | -0.12)  |        | 391.41)   | 91.57)    | -4.19)  |        | 8.61)   | 2.25)   | -4.22)  |        |
|            | 41.33)  | 34.07)  | -0.68)  |        | 192.74)  | 174.75)  | -0.33)  |        | 300.46)   | 134.61)   | -2.79)  |        | 5.31)   | 2.36)   | -2.83)  |        |
| Italy      | (40.13, | (32.86, | (-0.74, | <0.001 | (190.11, | (172.06, | (-0.38, | <0.001 | (297.18,  | (132.24,  | (-3.49, | <0.001 | (4.89,  | (2.06,  | (-3.21, | <0.001 |
|            | 42.57)  | 35.32)  | -0.62)  |        | 195.40)  | 177.47)  | -0.29)  |        | 303.77)   | 137.02)   | -2.09)  |        | 5.77)   | 2.70)   | -2.45)  |        |
|            | 62.43)  | 70.72)  | 0.45)   |        | 333.45)  | 388.11)  | 0.51)   |        | 128.95)   | 136.88)   | 0.22)   |        | 2.20)   | 2.35)   | 0.23)   |        |
| Jamaica    | (55.05, | (64.01, | (0.41,  | <0.001 | (315.50, | (371.88, | (0.46,  | <0.001 | (118.02,  | (127.32,  | (-1.75, | 0.831  | (0.98,  | (1.25,  | (-1.88, | 0.829  |
|            | 70.57)  | 77.97)  | 0.48)   |        | 352.19)  | 404.89)  | 0.56)   |        | 140.66)   | 146.98)   | 2.22)   |        | 4.29)   | 4.04)   | 2.39)   |        |
|            | 26.70)  | 23.54)  | -0.43)  |        | 133.99)  | 116.74)  | -0.48)  |        | 179.34)   | 129.33)   | -1.10)  |        | 3.12)   | 2.24)   | -1.11)  |        |
| Japan      | (26.03, | (22.84, | (-0.44, | <0.001 | (132.51, | (115.21, | (-0.50, | <0.001 | (177.61,  | (127.70,  | (-1.44, | <0.001 | (2.90,  | (2.03,  | (-1.46, | <0.001 |
|            | 27.38)  | 24.25)  | -0.42)  |        | 135.48)  | 118.29)  | -0.45)  |        | 181.07)   | 130.98)   | -0.75)  |        | 3.35)   | 2.47)   | -0.76)  |        |
|            | 46.83)  | 44.55)  | -0.18)  |        | 335.93)  | 325.60)  | -0.09)  |        | 632.35)   | 346.38)   | -1.99)  |        | 11.21)  | 6.05)   | -2.04)  |        |
| Jordan     | (41.49, | (42.04, | (-0.29, | 0.002  | (320.84, | (318.69, | (-0.22, | 0.184  | (611.79,  | (339.27,  | (-2.44, | <0.001 | (8.60,  | (5.14,  | (-2.49, | <0.001 |
|            | 52.71)  | 47.18)  | -0.06)  |        | 351.58)  | 332.62)  | 0.04)   |        | 653.45)   | 353.61)   | -1.54)  |        | 14.41)  | 7.07)   | -1.59)  |        |
|            | 45.94)  | 41.22)  | -0.37)  |        | 229.34)  | 210.52)  | -0.30)  |        | 1162.44)  | 513.15)   | -2.87)  |        | 21.13)  | 9.28)   | -2.88)  |        |
| Kazakhstan | (43.68, | (39.18, | (-0.39, | <0.001 | (224.23, | (205.91, | (-0.33, | <0.001 | (1150.87) | (505.93,  | (-4.11, | <0.001 | (19.59, | (8.33,  | (-4.13, | <0.001 |
|            | 48.29)  | 43.35)  | -0.35)  |        | 234.55)  | 215.22)  | -0.27)  |        | 1174.10)  | 520.47)   | -1.62)  |        | 22.76)  | 10.32)  | -1.62)  |        |
|            | 32.96)  | 34.01)  | 0.11)   |        | 209.46)  | 217.50)  | 0.14)   |        | 152.95)   | 250.82)   | 1.71)   |        | 2.59)   | 4.29)   | 1.75)   |        |
| Kenya      | (31.06, | (32.84, | (0.10,  | <0.001 | (204.45, | (214.45, | (0.12,  | <0.001 | (148.78,  | (247.62,  | (1.58,  | <0.001 | (2.07,  | (3.88,  | (1.62,  | <0.001 |
|            | 34.95)  | 35.22)  | 0.12)   |        | 214.57)  | 220.59)  | 0.16)   |        | 157.21)   | 254.06)   | 1.84)   |        | 3.21)   | 4.74)   | 1.88)   |        |
|            | 33.37)  | 34.67)  | 0.13)   |        | 220.38)  | 235.31)  | 0.23)   |        | 3160.96)  | 2933.05)  | -0.26)  |        | 57.65)  | 53.08)  | -0.29)  |        |
| Kiribati   | (9.85,  | (14.80, | (0.10,  | <0.001 | (146.04, | (175.59, | (0.21,  | <0.001 | (2856.81) | (2711.27) | (-0.35, | <0.001 | (23.43, | (27.11, | (-0.36, | <0.001 |
|            | 84.32)  | 69.43)  | 0.15)   |        | 320.24)  | 309.10)  | 0.24)   |        | 3489.43)  | 3168.38)  | -0.17)  |        | 119.10) | 93.84)  | -0.21)  |        |



|              |         |         |         |        |          |          |         |        |           |           |         |        |         |         |         |        |
|--------------|---------|---------|---------|--------|----------|----------|---------|--------|-----------|-----------|---------|--------|---------|---------|---------|--------|
|              | 44.31   | 45.17   | 0.07    |        | 322.94   | 339.09   | 0.19    |        | 757.45    | 680.29    | -0.35   |        | 13.08   | 11.84   | -0.32   |        |
| Kuwait       | (39.00, | (41.53, | (-0.02, | 0.117  | (308.49, | (329.47, | (0.09,  | <0.001 | (734.48,  | (665.91,  | (-2.31, | 0.725  | (10.24, | (10.04, | (-2.31, | 0.757  |
|              | 50.34)  | 49.16)  | 0.15)   |        | 338.07)  | 349.04)  | 0.29)   |        | 781.12)   | 695.01)   | 1.64)   |        | 16.67)  | 14.01)  | 1.72)   |        |
|              | 42.02   | 38.87   | -0.27   |        | 211.88   | 196.35   | -0.28   |        | 941.75    | 535.35    | -1.88   |        | 17.01   | 9.69    | -1.88   |        |
| Kyrgyzstan   | (37.72, | (35.56, | (-0.29, | <0.001 | (201.91, | (188.73, | (-0.31, | <0.001 | (920.64,  | (522.73,  | (-3.35, | 0.014  | (14.27, | (8.05,  | (-3.35, | 0.015  |
|              | 46.70)  | 42.41)  | -0.25)  |        | 222.24)  | 204.21)  | -0.24)  |        | 963.24)   | 548.21)   | -0.39)  |        | 20.15)  | 11.57)  | -0.37)  |        |
| Lao People's | 31.65   | 28.06   | -0.41   |        | 179.47   | 158.40   | -0.42   |        | 664.95    | 702.21    | 0.22    |        | 11.77   | 12.31   | 0.19    |        |
| Democratic   | (27.46, | (25.46, | (-0.43, | <0.001 | (169.11, | (152.06, | (-0.49, | <0.001 | (645.11,  | (688.93,  | (0.03,  | 0.027  | (9.25,  | (10.60, | (-0.01, | 0.056  |
| Republic     | 36.33)  | 30.86)  | -0.39)  |        | 190.32)  | 164.95)  | -0.36)  |        | 685.27)   | 715.68)   | 0.42)   |        | 14.79)  | 14.22)  | 0.38)   |        |
|              | 40.74   | 40.72   | 0.00    |        | 213.01   | 213.08   | -0.01   |        | 1026.47   | 296.24    | -4.25   |        | 18.80   | 5.36    | -4.27   |        |
| Latvia       | (35.32, | (34.06, | (-0.04, | 0.995  | (200.42, | (197.83, | (-0.05, | 0.459  | (998.62,  | (278.33,  | (-6.39, | <0.001 | (15.20, | (3.21,  | (-6.45, | <0.001 |
|              | 46.78)  | 48.52)  | 0.04)   |        | 226.23)  | 229.39)  | 0.02)   |        | 1054.93)  | 315.21)   | -2.05)  |        | 23.04)  | 8.74)   | -2.05)  |        |
|              | 41.72   | 43.41   | 0.14    |        | 280.57   | 306.64   | 0.32    |        | 1726.90   | 1140.70   | -1.40   |        | 30.32   | 19.75   | -1.45   |        |
| Lebanon      | (36.25, | (39.61, | (0.11,  | <0.001 | (265.78, | (296.43, | (0.25,  | <0.001 | (1690.75, | (1120.59, | (-1.61, | <0.001 | (25.66, | (17.19, | (-1.66, | <0.001 |
|              | 47.82)  | 47.52)  | 0.17)   |        | 295.99)  | 317.15)  | 0.39)   |        | '         | '         | -1.18)  |        | 35.60)  | 22.62)  | -1.24)  |        |
|              | 34.36   | 38.16   | 0.36    |        | 148.65   | 173.57   | 0.53    |        | 144.00    | 343.75    | 3.04    |        | 2.54    | 6.18    | 3.11    |        |
| Lesotho      | (27.86, | (32.78, | (0.32,  | <0.001 | (134.38, | (161.74, | (0.52,  | <0.001 | (130.04,  | (327.00,  | (2.54,  | <0.001 | (1.00,  | (4.12,  | (2.59,  | <0.001 |
|              | 41.98)  | 44.19)  | 0.41)   |        | 164.06)  | 186.04)  | 0.55)   |        | 159.10)   | 361.13)   | 3.55)   |        | 5.34)   | 8.92)   | 3.64)   |        |
|              | 34.52   | 37.32   | 0.27    |        | 206.20   | 224.03   | 0.30    |        | 262.75    | 249.33    | -0.26   |        | 4.62    | 4.37    | -0.28   |        |
| Liberia      | (27.99, | (33.37, | (0.26,  | <0.001 | (189.98, | (214.02, | (0.19,  | <0.001 | (244.51,  | (238.88,  | (-0.62, | 0.149  | (2.50,  | (3.08,  | (-0.64, | 0.128  |
|              | 42.18)  | 41.62)  | 0.28)   |        | 223.51)  | 234.39)  | 0.42)   |        | 282.05)   | 260.12)   | 0.09)   |        | 7.92)   | 6.02)   | 0.08)   |        |
|              | 39.75   | 43.44   | 0.28    |        | 258.37   | 295.25   | 0.48    |        | 1022.33   | 859.13    | -0.64   |        | 17.60   | 14.82   | -0.62   |        |
| Libya        | (35.40, | (40.34, | (0.13,  | <0.001 | (246.87, | (287.19, | (0.39,  | <0.001 | (1000.07, | (845.04,  | (-1.46, | 0.134  | (14.76, | (13.03, | (-1.45, | 0.140  |
|              | 44.51)  | 46.73)  | 0.42)   |        | 270.28)  | 303.49)  | 0.57)   |        | '         | '         | 0.20)   |        | 20.84)  | 16.80)  | 0.21)   |        |
|              | 41.36   | 37.75   | -0.32   |        | 209.09   | 185.50   | -0.42   |        | 1000.03   | 405.42    | -3.16   |        | 18.29   | 7.37    | -3.17   |        |
| Lithuania    | (36.75, | (32.35, | (-0.37, | <0.001 | (198.51, | (173.32, | (-0.46, | <0.001 | (976.68,  | (387.35,  | (-4.51, | <0.001 | (15.25, | (5.12,  | (-4.53, | <0.001 |
|              | 46.40)  | 43.91)  | -0.28)  |        | 220.10)  | 198.42)  | -0.38)  |        | 1023.81)  | 424.21)   | -1.78)  |        | 21.78)  | 10.42)  | -1.79)  |        |
|              | 26.61   | 23.10   | -0.49   |        | 148.24   | 143.06   | -0.10   |        | 370.40    | 106.72    | -4.22   |        | 6.55    | 1.87    | -4.27   |        |
| Luxembourg   | (16.65, | (15.30, | (-0.52, | <0.001 | (123.36, | (122.85, | (-0.23, | 0.130  | (329.74,  | (89.29,   | (-5.03, | <0.001 | (2.24,  | (0.28,  | (-5.04, | <0.001 |
|              | 41.44)  | 34.12)  | -0.47)  |        | 177.57)  | 166.21)  | 0.03)   |        | 415.48)   | 127.15)   | -3.40)  |        | 16.35)  | 7.44)   | -3.48)  |        |
| Madagascar   | 30.62   | 33.59   | 0.32    | <0.001 | 182.19   | 203.21   | 0.39    | <0.001 | 762.96    | 611.09    | -0.64   | 0.095  | 13.46   | 10.75   | -0.72   | 0.003  |

|                   |         |         |         |        |          |          |         |        |           |           |         |        |         |         |         |        |
|-------------------|---------|---------|---------|--------|----------|----------|---------|--------|-----------|-----------|---------|--------|---------|---------|---------|--------|
|                   | (28.19, | (31.96, | (0.31,  |        | (175.98, | (199.05, | (0.32,  |        | (750.45,  | (603.99,  | (-1.39, |        | (11.83, | (9.82,  | (-1.20, |        |
|                   | 33.21)  | 35.28)  | 0.33)   |        | 188.57)  | 207.43)  | 0.45)   |        | 775.63)   | 618.25)   | 0.11)   |        | 15.26)  | 11.74)  | -0.24)  |        |
|                   | 36.02   | 36.87   | 0.08    |        | 212.54   | 219.42   | 0.14    |        | 365.24    | 405.97    | 0.41    |        | 6.32    | 7.03    | 0.42    |        |
| Malawi            | (33.03, | (34.74, | (0.06,  | <0.001 | (204.91, | (214.02, | (0.01,  | 0.035  | (355.48,  | (398.83,  | (0.20,  | <0.001 | (5.09,  | (6.11,  | (0.20,  | <0.001 |
|                   | 39.23)  | 39.10)  | 0.10)   |        | 220.40)  | 224.92)  | 0.27)   |        | 375.22)   | 413.22)   | 0.63)   |        | 7.78)   | 8.06)   | 0.63)   |        |
|                   | 32.60   | 32.09   | -0.05   |        | 237.39   | 238.69   | 0.04    |        | 440.24    | 628.96    | 1.29    |        | 7.77    | 11.23   | 1.34    |        |
| Malaysia          | (30.73, | (30.81, | (-0.10, | 0.049  | (232.24, | (235.18, | (-0.03, | 0.313  | (433.24,  | (623.25,  | (0.35,  | 0.007  | (6.87,  | (10.48, | (0.39,  | 0.006  |
|                   | 34.55)  | 33.41)  | 0.00)   |        | 242.62)  | 242.24)  | 0.11)   |        | 447.32)   | 634.70)   | 2.24)   |        | 8.77)   | 12.02)  | 2.31)   |        |
|                   | 30.25   | 27.30   | -0.36   |        | 223.40   | 201.20   | -0.36   |        | 1012.22   | 352.67    | -3.59   |        | 18.10   | 6.11    | -3.69   |        |
| Maldives          | (14.18, | (20.30, | (-0.38, | <0.001 | (172.75, | (182.01, | (-0.38, | <0.001 | (901.51,  | (326.02,  | (-4.29, | <0.001 | (6.15,  | (3.11,  | (-4.40, | <0.001 |
|                   | 57.87)  | 37.16)  | -0.34)  |        | 285.00)  | 222.88)  | -0.33)  |        | 1133.48)  | 381.84)   | -2.87)  |        | 42.32)  | 12.49)  | -2.98)  |        |
|                   | 30.07   | 31.56   | 0.17    |        | 164.23   | 171.82   | 0.16    |        | 177.66    | 188.33    | 0.24    |        | 3.08    | 3.26    | 0.23    |        |
| Mali              | (27.05, | (29.60, | (0.16,  | <0.001 | (156.91, | (167.04, | (0.15,  | <0.001 | (170.19,  | (183.47,  | (-0.13, | 0.207  | (2.17,  | (2.64,  | (-0.15, | 0.234  |
|                   | 33.34)  | 33.61)  | 0.18)   |        | 171.81)  | 176.71)  | 0.17)   |        | 185.39)   | 193.29)   | 0.61)   |        | 4.27)   | 3.99)   | 0.61)   |        |
|                   | 31.48   | 26.17   | -0.64   |        | 174.94   | 158.10   | -0.34   |        | 349.24    | 199.67    | -1.95   |        | 6.10    | 3.52    | -1.91   |        |
| Malta             | (20.05, | (16.15, | (-0.66, | <0.001 | (146.63, | (132.24, | (-0.39, | <0.001 | (308.11,  | (170.11,  | (-2.79, | <0.001 | (1.86,  | (0.70,  | (-2.73, | <0.001 |
|                   | 47.57)  | 41.48)  | -0.62)  |        | 207.58)  | 188.66)  | -0.28)  |        | 394.72)   | 233.95)   | -1.10)  |        | 15.47)  | 12.71)  | -1.09)  |        |
|                   | 29.70   | 30.54   | 0.09    |        | 203.67   | 216.41   | 0.20    |        | 1617.05   | 2282.68   |         |        |         |         |         |        |
| Marshall Islands  | (4.36,  | (7.84,  | (0.06,  | <0.001 | (114.27, | (142.18, | (0.19,  | <0.001 | (1342.60, | (2023.55, |         |        | 28.78   | 41.40   | 1.36    |        |
|                   | 102.79) | 81.13)  | 0.11)   |        | 336.51)  | 316.10)  | 0.22)   |        | ,         | ,         | 1.49)   |        | 101.90) | 96.49)  | 1.61)   | <0.001 |
|                   | 34.05   | 35.61   | 0.15    |        | 210.44   | 221.22   | 0.19    |        | 1932.23)  | 2566.16)  |         |        |         |         |         |        |
| Mauritania        | (28.00, | (31.21, | (0.13,  | <0.001 | (194.57, | (209.72, | (0.15,  | <0.001 | 301.08    | 164.91    | -2.02   |        | 5.31    | 2.86    | -2.06   |        |
|                   | 41.07)  | 40.48)  | 0.17)   |        | 227.29)  | 233.20)  | 0.22)   |        | (282.25,  | (155.13,  | (-2.16, | <0.001 | (3.07,  | (1.70,  | (-2.19, | <0.001 |
|                   | 31.64   | 28.43   | -0.36   |        | 246.13   | 219.20   | -0.39   |        | 320.87)   | 175.16)   | -1.89)  |        | 8.59)   | 4.53)   | -1.93)  |        |
| Mauritius         | (25.08, | (22.17, | (-0.39, | <0.001 | (227.04, | (201.27, | (-0.42, | <0.001 | 1223.37   | 579.60    | -2.49   |        | 22.14   | 10.30   | -2.55   |        |
|                   | 39.43)  | 35.99)  | -0.34)  |        | 266.43)  | 238.38)  | -0.37)  |        | (1180.27, | (550.13,  | (-3.06, | <0.001 | (16.67, | (6.72,  | (-3.13, | <0.001 |
|                   | 30.66   | 29.20   | -0.17   |        | 159.80   | 161.58   | 0.04    |        | ,         | 610.32)   | -1.91)  |        | 28.86)  | 15.21)  | -1.97)  |        |
|                   | (29.77, | (28.52, | (-0.19, | <0.001 | (157.70, | (159.97, | (-0.02, | 0.173  | 1267.67)  |           |         |        |         |         |         |        |
|                   | 31.57)  | 29.89)  | -0.15)  |        | 161.91)  | 163.19)  | 0.09)   |        | 349.53    | 478.53    | 1.09    |        | 6.13    | 8.33    | 1.06    |        |
| Mexico            | (29.77, | (28.52, | (-0.19, | <0.001 | (157.70, | (159.97, | (-0.02, | 0.173  | (346.49,  | (475.78,  | (0.50,  | <0.001 | (5.73,  | (7.97,  | (0.45,  | 0.001  |
|                   | 31.57)  | 29.89)  | -0.15)  |        | 161.91)  | 163.19)  | 0.09)   |        | 352.60)   | 481.29)   | 1.68)   |        | 6.55)   | 8.70)   | 1.66)   |        |
| Micronesia        | 31.27   | 29.75   | -0.18   |        | 210.75   | 202.73   | -0.14   |        | 2292.04   | 2323.73   | 0.05    |        | 41.79   | 41.78   | -0.01   |        |
| (Federated States | (11.03, | (10.67, | (-0.21, | <0.001 | (148.50, | (143.57, | (-0.17, | <0.001 | (2073.61, | (2111.84, | (-0.02, | 0.170  | (17.21, | (17.90, | (-0.09, | 0.877  |

|             |         |         |         |        |          |          |         |        |           |           |         |        |         |         |         |        |
|-------------|---------|---------|---------|--------|----------|----------|---------|--------|-----------|-----------|---------|--------|---------|---------|---------|--------|
| of)         | 70.43)  | 66.51)  | -0.15)  |        | 290.70)  | 278.49)  | -0.10)  |        | ,         | ,         | 0.12)   |        | 85.27)  | 83.27)  | 0.08)   |        |
|             |         |         |         |        |          |          |         |        | 2527.51)  | 2551.49)  |         |        |         |         |         |        |
|             | 35.82)  | 30.10)  | -0.60)  |        | 180.08)  | 165.37)  | -0.30)  |        | 314.89)   | 182.93)   | -1.85)  |        | 5.63)   | 3.27)   | -1.85)  |        |
| Monaco      | (3.67,  | (1.99,  | (-0.65, | <0.001 | (83.91,  | (71.78,  | (-0.35, | <0.001 | (180.79,  | (83.43,   | (-1.92, | <0.001 | (0.00,  | (0.00,  | (-1.91, | <0.001 |
|             | 171.87) | 138.56) | -0.55)  |        | 363.08)  | 330.01)  | -0.24)  |        | 531.88)   | 353.03)   | -1.78)  |        | 127.98) | 92.36)  | -1.79)  |        |
|             | 46.37)  | 45.77)  | -0.01)  |        | 229.99)  | 237.15)  | 0.11)   |        | 879.89)   | 1096.91)  | 0.79)   |        | 15.81)  | 19.71)  | 0.78)   |        |
| Mongolia    | (39.61, | (41.02, | (-0.14, | 0.871  | (214.12, | (226.27, | (0.10,  | <0.001 | (848.75,  | (1073.30, | (0.04,  | 0.039  | (11.85, | (16.67, | (0.00,  | 0.049  |
|             | 54.02)  | 50.99)  | 0.12)   |        | 246.78)  | 248.48)  | 0.12)   |        | 911.93)   | ,         | 1.54)   |        | 20.74)  | 23.23)  | 1.57)   |        |
|             | 33.59)  | 30.24)  | -0.36)  |        | 257.50)  | 232.52)  | -0.35)  |        | 717.39)   | 314.13)   | -3.54)  |        | 12.81)  | 5.59)   | -3.54)  |        |
| Montenegro  | (24.42, | (21.01, | (-0.37, | <0.001 | (230.82, | (205.75, | (-0.37, | <0.001 | (672.37,  | (282.89,  | (-5.72, | 0.002  | (7.44,  | (2.17,  | (-5.67, | 0.002  |
|             | 45.14)  | 42.37)  | -0.35)  |        | 286.48)  | 262.03)  | -0.33)  |        | 764.70)   | 348.09)   | -1.30)  |        | 20.62)  | 12.12)  | -1.36)  |        |
|             | 45.40)  | 43.74)  | -0.13)  |        | 324.76)  | 323.43)  | 0.00)   |        | 1005.55)  | 555.50)   | -1.98)  |        | 17.80)  | 9.65)   | -2.04)  |        |
| Morocco     | (43.46, | (42.24, | (-0.15, | <0.001 | (319.43, | (319.34, | (-0.08, | 0.984  | (996.26,  | (550.14,  | (-2.29, | <0.001 | (16.58, | (8.96,  | (-2.35, | <0.001 |
|             | 47.41)  | 45.28)  | -0.11)  |        | 330.16)  | 327.56)  | 0.08)   |        | 1014.91)  | 560.91)   | -1.66)  |        | 19.10)  | 10.39)  | -1.73)  |        |
|             | 36.80)  | 38.24)  | 0.13)   |        | 204.59)  | 217.05)  | 0.24)   |        | 209.22)   | 383.74)   | 2.15)   |        | 3.59)   | 6.66)   | 2.17)   |        |
| Mozambique  | (34.04, | (36.43, | (0.12,  | <0.001 | (197.91, | (212.54, | (0.09,  | 0.002  | (202.62,  | (377.92,  | (1.96,  | <0.001 | (2.77,  | (5.91,  | (1.99,  | <0.001 |
|             | 39.72)  | 40.13)  | 0.14)   |        | 211.45)  | 221.63)  | 0.38)   |        | 215.98)   | 389.63)   | 2.34)   |        | 4.59)   | 7.49)   | 2.36)   |        |
|             | 33.19)  | 29.39)  | -0.42)  |        | 186.01)  | 163.70)  | -0.43)  |        | 562.66)   | 498.02)   | -0.36)  |        | 9.82)   | 8.47)   | -0.45)  |        |
| Myanmar     | (31.90, | (28.36, | (-0.46, | <0.001 | (182.89, | (161.26, | (-0.50, | <0.001 | (557.33,  | (493.77,  | (-0.59, | 0.003  | (9.12,  | (7.93,  | (-0.67, | <0.001 |
|             | 34.52)  | 30.45)  | -0.39)  |        | 189.18)  | 166.17)  | -0.36)  |        | 568.04)   | 502.30)   | -0.12)  |        | 10.56)  | 9.05)   | -0.23)  |        |
|             | 37.98)  | 36.55)  | -0.13)  |        | 196.72)  | 192.17)  | -0.10)  |        | 186.65)   | 223.76)   | 0.72)   |        | 3.29)   | 3.96)   | 0.74)   |        |
| Namibia     | (30.30, | (31.26, | (-0.15, | <0.001 | (177.98, | (179.49, | (-0.17, | 0.010  | (168.48,  | (210.06,  | (0.31,  | <0.001 | (1.29,  | (2.33,  | (0.31,  | 0.001  |
|             | 47.14)  | 42.52)  | -0.12)  |        | 216.95)  | 205.54)  | -0.02)  |        | 206.31)   | 238.14)   | 1.12)   |        | 6.98)   | 6.33)   | 1.17)   |        |
|             | 31.35)  | 32.15)  | 0.07)   |        | 218.17)  | 226.97)  | 0.14)   |        | 2998.34)  | 3353.47)  | 0.39)   |        | 54.45)  | 60.57)  | 0.37)   |        |
| Nauru       | (0.09,  | (0.19,  | (0.04,  | <0.001 | (60.37,  | (70.59,  | (0.13,  | <0.001 | (2265.23, | (2614.36, | (0.26,  | <0.001 | (1.44,  | (2.92,  | (0.24,  | <0.001 |
|             | 266.30) | 246.33) | 0.11)   |        | 559.82)  | 547.23)  | 0.14)   |        | ,         | ,         | 0.52)   |        | 307.70) | 296.12) | 0.50)   |        |
|             | 29.31)  | 27.11)  | -0.27)  |        | 174.40)  | 161.52)  | -0.27)  |        | 546.81)   | 553.42)   | 0.06)   |        | 9.67)   | 9.62)   | -0.00)  |        |
| Nepal       | (27.46, | (25.71, | (-0.28, | <0.001 | (169.75, | (157.98, | (-0.31, | <0.001 | (538.63,  | (547.04,  | (-0.19, | 0.651  | (8.60,  | (8.79,  | (-0.25, | 0.978  |
|             | 31.26)  | 28.57)  | -0.26)  |        | 179.16)  | 165.12)  | -0.23)  |        | 555.09)   | 559.86)   | 0.31)   |        | 10.83)  | 10.51)  | 0.24)   |        |
|             | 62.84)  | 53.68)  | -0.54)  |        | 260.08)  | 253.48)  | -0.13)  |        | 298.16)   | 84.25)    | -4.21)  |        | 5.39)   | 1.48)   | -4.39)  |        |
| Netherlands | (60.13, | (50.98, | (-0.56, | <0.001 | (254.55, | (247.60, | (-0.28, | 0.104  | (292.24,  | (80.88,   | (-4.63, | <0.001 | (4.62,  | (1.06,  | (-4.75, | <0.001 |

|                          |          |          |         |        |          |          |         |        |          |           |         |        |          |          |         |        |
|--------------------------|----------|----------|---------|--------|----------|----------|---------|--------|----------|-----------|---------|--------|----------|----------|---------|--------|
|                          | 65.66)   | 56.49)   | -0.52)  |        | 265.71)  | 259.47)  | 0.03)   |        | 304.19)  | 87.73)    | -3.78)  |        | 6.26)    | 2.01)    | -4.02)  |        |
|                          | 64.63)   | 54.88)   | -0.55)  |        | 270.75)  | 256.68)  | -0.18)  |        | 372.16)  | 151.30)   | -3.00)  |        | 6.71)    | 2.73)    | -3.05)  |        |
| New Zealand              | (58.77,  | (49.52,  | (-0.60, | <0.001 | (258.61, | (244.93, | (-0.22, | <0.001 | (357.89, | (142.32,  | (-3.67, | <0.001 | (4.92,   | (1.65,   | (-3.82, | <0.001 |
|                          | 70.93)   | 60.67)   | -0.51)  |        | 283.32)  | 268.84)  | -0.15)  |        | 386.85)  | 160.70)   | -2.32)  |        | 8.95)    | 4.27)    | -2.26)  |        |
|                          | 28.92)   | 29.27)   | 0.05)   |        | 156.91)  | 173.26)  | 0.33)   |        | 277.93)  | 239.82)   | -0.79)  |        | 4.83)    | 4.02)    | -0.92)  |        |
| Nicaragua                | (24.72,  | (26.45,  | (0.03,  | <0.001 | (146.55, | (166.20, | (0.29,  | <0.001 | (264.49, | (231.66,  | (-1.69, | 0.090  | (3.19,   | (3.02,   | (-1.84, | 0.053  |
|                          | 33.67)   | 32.31)   | 0.06)   |        | 167.83)  | 180.55)  | 0.37)   |        | 291.91)  | 248.20)   | 0.12)   |        | 7.04)    | 5.25)    | 0.01)   |        |
|                          | 30.27)   | 32.24)   | 0.22)   |        | 171.93)  | 180.86)  | 0.19)   |        | 257.63)  | 259.02)   | 0.07)   |        | 4.53)    | 4.55)    | 0.07)   |        |
| Niger                    | (27.15,  | (30.28,  | (0.19,  | <0.001 | (164.16, | (176.00, | (0.11,  | <0.001 | (248.23, | (253.31,  | (-0.31, | 0.720  | (3.35,   | (3.81,   | (-0.31, | 0.728  |
|                          | 33.66)   | 34.29)   | 0.24)   |        | 179.99)  | 185.82)  | 0.27)   |        | 267.30)  | 264.82)   | 0.45)   |        | 6.00)    | 5.38)    | 0.44)   |        |
|                          | 28.97)   | 32.23)   | 0.37)   |        | 162.36)  | 185.62)  | 0.47)   |        | 250.64)  | 243.26)   | -0.14)  |        | 4.43)    | 4.27)    | -0.16)  |        |
| Nigeria                  | (28.12,  | (31.62,  | (0.34,  | <0.001 | (160.30, | (184.11, | (0.40,  | <0.001 | (248.11, | (241.57,  | (-0.53, | 0.492  | (4.09,   | (4.05,   | (-0.55, | 0.428  |
|                          | 29.84)   | 32.85)   | 0.40)   |        | 164.44)  | 187.13)  | 0.55)   |        | 253.20)  | 244.97)   | 0.25)   |        | 4.78)    | 4.51)    | 0.23)   |        |
|                          | 30.12)   | 30.63)   | 0.05)   |        | 233.28)  | 245.61)  | 0.17)   |        | 1647.02) | 1187.96)  | -1.19)  |        | 29.81)   | 21.15)   | -1.19)  |        |
| Niue                     | (0.00,   | (0.00,   | (0.04,  | <0.001 | (3.46,   | (1.32,   | (0.13,  | <0.001 | (606.83, | (266.98,  | (-1.58, | <0.001 | (0.00,   | (0.00,   | (-1.51, | <0.001 |
|                          | 1091.41) | 1526.93) | 0.07)   |        | 1470.07) | 1920.37) | 0.21)   |        | 3589.25) | 3410.69)  | -0.79)  |        | 1092.01) | 1508.38) | -0.87)  |        |
|                          | )        | )        | )       |        | )        | )        | )       |        | )        | )         | )       |        | )        | )        | )       |        |
|                          | 29.44)   | 26.66)   | -0.34)  |        | 216.67)  | 198.97)  | -0.31)  |        | 691.11)  | 424.11)   | -1.50)  |        | 12.31)   | 7.50)    | -1.51)  |        |
| North Macedonia          | (24.48,  | (22.08,  | (-0.36, | <0.001 | (202.86, | (186.31, | (-0.36, | <0.001 | (666.24, | (405.28,  | (-2.83, | 0.029  | (9.20,   | (5.20,   | (-2.88, | 0.035  |
|                          | 35.11)   | 32.07)   | -0.33)  |        | 231.18)  | 212.39)  | -0.26)  |        | 716.68)  | 443.73)   | -0.15)  |        | 16.17)   | 10.67)   | -0.11)  |        |
|                          | 27.26)   | 29.47)   | 0.27)   |        | 219.08)  | 246.89)  | 0.40)   |        | 673.07)  | 696.69)   | 0.07)   |        | 12.14)   | 12.50)   | 0.05)   |        |
| Northern Mariana Islands | (6.55,   | (2.69,   | (0.26,  | <0.001 | (146.65, | (133.39, | (0.36,  | <0.001 | (540.95, | (493.05,  | (-0.12, | 0.478  | (1.02,   | (0.07,   | (-0.15, | 0.648  |
|                          | 83.31)   | 128.23)  | 0.28)   |        | 320.95)  | 423.34)  | 0.44)   |        | 833.06)  | 960.73)   | 0.25)   |        | 61.24)   | 101.95)  | 0.24)   |        |
|                          | 37.55)   | 30.63)   | -0.72)  |        | 185.83)  | 162.56)  | -0.47)  |        | 335.30)  | 72.43)    | -5.09)  |        | 6.03)    | 1.27)    | -5.17)  |        |
| Norway                   | (33.54,  | (27.23,  | (-0.75, | <0.001 | (176.81, | (154.69, | (-0.49, | <0.001 | (323.14, | (67.22,   | (-5.91, | <0.001 | (4.50,   | (0.67,   | (-6.04, | <0.001 |
|                          | 41.93)   | 34.36)   | -0.68)  |        | 195.22)  | 170.76)  | -0.44)  |        | 347.81)  | 77.96)    | -4.26)  |        | 7.94)    | 2.24)    | -4.30)  |        |
|                          | 42.62)   | 46.96)   | 0.33)   |        | 281.96)  | 332.14)  | 0.57)   |        | 819.11)  | 394.13)   | -2.46)  |        | 14.40)   | 6.69)    | -2.58)  |        |
| Oman                     | (37.34,  | (43.99,  | (0.29,  | <0.001 | (268.16, | (324.41, | (0.52,  | <0.001 | (795.15, | (384.59,  | (-3.05, | <0.001 | (11.38,  | (5.52,   | (-3.19, | <0.001 |
|                          | 48.53)   | 50.21)   | 0.38)   |        | 296.35)  | 340.14)  | 0.63)   |        | 843.68)  | 403.96)   | -1.87)  |        | 18.05)   | 8.18)    | -1.96)  |        |
|                          | 32.48)   | 34.14)   | 0.17)   |        | 198.79)  | 206.90)  | 0.14)   |        | 721.02)  | 1404.81)  | 2.38)   |        | 12.77)   | 24.69)   | 2.36)   |        |
| Pakistan                 | (31.65,  | (33.58,  | (0.12,  | <0.001 | (196.66, | (205.47, | (0.13,  | <0.001 | (717.04, | (1401.16) | (2.14,  | <0.001 | (12.24,  | (24.20,  | (2.11,  | <0.001 |
|                          | 33.33)   | 34.72)   | 0.21)   |        | 200.93)  | 208.33)  | 0.16)   |        | 725.02)  | '         | 2.63)   |        | 13.32)   | 25.18)   | 2.60)   |        |
|                          |          |          |         |        |          |          |         |        |          | 1408.47)  |         |        |          |          |         |        |

|                  |         |         |         |        |          |          |         |        |           |           |         |        |         |         |         |        |
|------------------|---------|---------|---------|--------|----------|----------|---------|--------|-----------|-----------|---------|--------|---------|---------|---------|--------|
|                  | 30.48   | 31.26   | 0.08    |        | 224.16   | 237.04   | 0.19    |        | 1817.20   | 1794.66   | 0.01    |        | 32.88   | 32.36   | 0.00    |        |
| Palau            | (0.92,  | (1.42,  | (0.06,  | <0.001 | (94.23,  | (112.92, | (0.18,  | <0.001 | (1392.12, | (1409.28, | (-0.44, | 0.972  | (1.14,  | (1.85,  | (-0.44, | 0.999  |
|                  | 169.92) | 180.19) | 0.10)   |        | 452.18)  | 458.65)  | 0.20)   |        | '         | '         | 0.46)   |        | 174.87) | 180.32) | 0.44)   |        |
|                  |         |         |         |        |          |          |         |        | 2333.32)  | 2267.38)  |         |        |         |         |         |        |
|                  | 44.50   | 44.57   | 0.00    |        | 304.57   | 316.51   | 0.15    |        | 734.55    | 446.56    | -1.75   |        | 13.03   | 7.86    | -1.78   |        |
| Palestine        | (37.21, | (40.35, | (-0.02, | 0.786  | (284.27, | (304.81, | (0.05,  | 0.003  | (703.25,  | (432.76,  | (-2.34, | <0.001 | (9.12,  | (6.12,  | (-2.40, | <0.001 |
|                  | 52.91)  | 49.14)  | 0.02)   |        | 326.00)  | 328.56)  | 0.26)   |        | 766.97)   | 460.70)   | -1.16)  |        | 18.13)  | 9.97)   | -1.15)  |        |
|                  | 26.78   | 27.46   | 0.09    |        | 139.19   | 157.32   | 0.41    |        | 284.92    | 167.12    | -1.64   |        | 5.00    | 2.92    | -1.66   |        |
| Panama           | (22.26, | (23.94, | (0.08,  | <0.001 | (128.34, | (148.68, | (0.33,  | <0.001 | (269.54,  | (158.23,  | (-2.64, | 0.001  | (3.14,  | (1.85,  | (-2.69, | 0.002  |
|                  | 31.98)  | 31.36)  | 0.10)   |        | 150.73)  | 166.33)  | 0.49)   |        | 300.98)   | 176.38)   | -0.63)  |        | 7.58)   | 4.38)   | -0.61)  |        |
|                  | 30.84   | 31.62   | 0.08    |        | 220.35   | 232.54   | 0.18    |        | 827.59    | 1027.75   | 0.68    |        | 15.00   | 18.56   | 0.67    |        |
| Papua New Guinea | (26.98, | (29.15, | (0.07,  | <0.001 | (209.53, | (225.66, | (0.17,  | <0.001 | (806.42,  | (1013.25, | (0.52,  | <0.001 | (12.26, | (16.65, | (0.51,  | <0.001 |
|                  | 35.14)  | 34.24)  | 0.10)   |        | 231.60)  | 239.57)  | 0.20)   |        | 849.18)   | '         | 0.84)   |        | 18.19)  | 20.63)  | 0.82)   |        |
|                  |         |         |         |        |          |          |         |        |           | 1042.41)  |         |        |         |         |         |        |
|                  | 20.67   | 20.71   | 0.01    |        | 202.57   | 217.05   | 0.25    |        | 305.56    | 286.87    | -0.02   |        | 5.35    | 4.94    | -0.07   |        |
| Paraguay         | (17.50, | (18.47, | (-0.01, | 0.300  | (192.15, | (209.58, | (0.23,  | <0.001 | (292.81,  | (278.30,  | (-0.96, | 0.969  | (3.78,  | (3.87,  | (-1.01, | 0.886  |
|                  | 24.25)  | 23.15)  | 0.04)   |        | 213.42)  | 224.73)  | 0.27)   |        | 318.72)   | 295.64)   | 0.93)   |        | 7.37)   | 6.21)   | 0.88)   |        |
|                  | 12.40   | 12.26   | -0.03   |        | 96.17    | 98.75    | 0.09    |        | 485.12    | 273.86    | -1.74   |        | 8.30    | 4.65    | -1.78   |        |
| Peru             | (11.32, | (11.44, | (-0.10, | 0.438  | (93.00,  | (96.39,  | (0.07,  | <0.001 | (478.23,  | (269.94,  | (-2.57, | <0.001 | (7.41,  | (4.15,  | (-2.62, | <0.001 |
|                  | 13.57)  | 13.12)  | 0.04)   |        | 99.42)   | 101.15)  | 0.11)   |        | 492.09)   | 277.82)   | -0.90)  |        | 9.27)   | 5.19)   | -0.94)  |        |
|                  | 48.57   | 46.89   | -0.12   |        | 243.41   | 249.44   | 0.09    |        | 398.44    | 1164.90   | 3.85    |        | 6.97    | 20.44   | 3.87    |        |
| Philippines      | (47.30, | (46.00, | (-0.14, | <0.001 | (240.50, | (247.36, | (0.04,  | <0.001 | (394.77,  | (1160.43, | (3.20,  | <0.001 | (6.49,  | (19.85, | (3.16,  | <0.001 |
|                  | 49.86)  | 47.79)  | -0.09)  |        | 246.34)  | 251.54)  | 0.13)   |        | 402.14)   | '         | 4.51)   |        | 7.48)   | 21.04)  | 4.57)   |        |
|                  |         |         |         |        |          |          |         |        |           | 1169.37)  |         |        |         |         |         |        |
|                  | 19.16   | 17.20   | -0.37   |        | 170.87   | 154.46   | -0.35   |        | 1076.51   | 163.71    | -6.45   |        | 19.63   | 2.91    | -6.53   |        |
| Poland           | (18.22, | (16.25, | (-0.40, | <0.001 | (168.07, | (151.72, | (-0.38, | <0.001 | (1069.52, | (160.93,  | (-7.51, | <0.001 | (18.70, | (2.55,  | (-7.63, | <0.001 |
|                  | 20.15)  | 18.20)  | -0.34)  |        | 173.70)  | 157.25)  | -0.31)  |        | '         | 166.54)   | -5.37)  |        | 20.60)  | 3.32)   | -5.42)  |        |
|                  |         |         |         |        |          |          |         |        | 1083.54)  |           |         |        |         |         |         |        |
|                  | 17.28   | 14.75   | -0.55   |        | 121.14   | 132.91   | 0.58    |        | 408.51    | 120.95    | -4.20   |        | 7.24    | 2.16    | -4.19   |        |
| Portugal         | (15.44, | (12.94, | (-0.59, | <0.001 | (116.16, | (127.45, | (-0.15, | 0.119  | (399.33,  | (115.79,  | (-5.20, | <0.001 | (6.06,  | (1.53,  | (-5.24, | <0.001 |
|                  | 19.29)  | 16.77)  | -0.51)  |        | 126.28)  | 138.55)  | 1.31)   |        | 417.85)   | 126.30)   | -3.19)  |        | 8.58)   | 3.00)   | -3.13)  |        |
|                  | 66.24   | 68.69   | 0.13    |        | 332.29   | 344.59   | 0.12    |        | 406.22    | 191.82    | -2.50   |        | 7.23    | 3.35    | -2.48   |        |
| Puerto Rico      | (60.14, | (61.98, | (0.08,  | <0.001 | (318.34, | (329.43, | (0.10,  | <0.001 | (390.80,  | (180.55,  | (-3.43, | <0.001 | (5.31,  | (2.01,  | (-3.97, | 0.001  |

|                                  |         |         |         |        |          |          |         |        |           |           |         |        |         |         |         |        |
|----------------------------------|---------|---------|---------|--------|----------|----------|---------|--------|-----------|-----------|---------|--------|---------|---------|---------|--------|
|                                  | 72.79)  | 75.94)  | 0.17)   |        | 346.69)  | 360.28)  | 0.15)   |        | 422.09)   | 203.62)   | -1.57)  |        | 9.64)   | 5.25)   | -0.97)  |        |
|                                  | 39.84)  | 37.34)  | -0.23)  |        | 267.51)  | 254.61)  | -0.17)  |        | 377.07)   | 159.06)   | -2.86)  |        | 6.47)   | 2.69)   | -2.90)  |        |
| Qatar                            | (31.50, | (34.26, | (-0.28, | <0.001 | (245.90, | (246.74, | (-0.20, | <0.001 | (349.09,  | (152.12,  | (-3.56, | <0.001 | (3.34,  | (1.87,  | (-3.66, | <0.001 |
|                                  | 51.00)  | 40.96)  | -0.17)  |        | 291.59)  | 262.97)  | -0.14)  |        | 407.65)   | 166.52)   | -2.15)  |        | 13.05)  | 4.24)   | -2.14)  |        |
|                                  | 21.33)  | 19.31)  | -0.35)  |        | 107.53)  | 105.00)  | -0.09)  |        | 727.76)   | 91.57)    | -6.93)  |        | 12.41)  | 1.60)   | -6.85)  |        |
| Republic of Korea                | (20.46, | (18.47, | (-0.37, | <0.001 | (105.53, | (103.05, | (-0.12, | <0.001 | (722.60,  | (89.74,   | (-7.78, | <0.001 | (11.75, | (1.37,  | (-7.74, | <0.001 |
|                                  | 22.24)  | 20.19)  | -0.32)  |        | 109.56)  | 106.98)  | -0.06)  |        | 732.96)   | 93.43)    | -6.08)  |        | 13.11)  | 1.87)   | -5.96)  |        |
|                                  | 42.83)  | 43.20)  | 0.02)   |        | 199.95)  | 201.02)  | 0.00)   |        | 595.76)   | 520.87)   | -0.45)  |        | 10.66)  | 9.36)   | -0.47)  |        |
| Republic of Moldova              | (38.69, | (38.66, | (-0.04, | 0.524  | (190.99, | (191.37, | (-0.08, | 0.951  | (580.09,  | (505.14,  | (-1.67, | 0.477  | (8.66,  | (7.37,  | (-1.89, | 0.522  |
|                                  | 47.34)  | 48.23)  | 0.09)   |        | 209.26)  | 211.12)  | 0.08)   |        | 611.78)   | 537.05)   | 0.79)   |        | 13.02)  | 11.85)  | 0.97)   |        |
|                                  | 24.96)  | 24.28)  | -0.09)  |        | 205.11)  | 196.12)  | -0.15)  |        | 783.78)   | 406.61)   | -2.29)  |        | 14.13)  | 7.24)   | -2.34)  |        |
| Romania                          | (23.50, | (22.59, | (-0.12, | <0.001 | (200.95, | (191.38, | (-0.18, | <0.001 | (775.63,  | (399.72,  | (-3.36, | <0.001 | (13.06, | (6.35,  | (-3.44, | <0.001 |
|                                  | 26.48)  | 26.07)  | -0.07)  |        | 209.34)  | 200.96)  | -0.12)  |        | 792.00)   | 413.59)   | -1.21)  |        | 15.27)  | 8.23)   | -1.23)  |        |
|                                  | 44.86)  | 42.91)  | -0.15)  |        | 176.59)  | 175.79)  | -0.03)  |        | 1077.89)  | 798.03)   | -1.10)  |        | 19.67)  | 14.41)  | -1.13)  |        |
| Russian Federation               | (44.13, | (42.15, | (-0.20, | <0.001 | (175.15, | (174.29, | (-0.10, | 0.411  | (1074.35) | (794.80,  | (-2.56, | 0.143  | (19.20, | (13.98, | (-2.58, | 0.130  |
|                                  | 45.60)  | 43.69)  | -0.10)  |        | 178.03)  | 177.31)  | 0.04)   |        | 1081.44)  | 801.28)   | 0.38)   |        | 20.16)  | 14.85)  | 0.34)   |        |
|                                  | 28.61)  | 28.20)  | -0.05)  |        | 156.61)  | 155.16)  | -0.03)  |        | 353.92)   | 236.27)   | -1.41)  |        | 6.19)   | 4.09)   | -1.44)  |        |
| Rwanda                           | (25.65, | (26.14, | (-0.07, | <0.001 | (149.39, | (150.17, | (-0.04, | <0.001 | (343.24,  | (230.20,  | (-1.63, | <0.001 | (4.84,  | (3.33,  | (-1.66, | <0.001 |
|                                  | 31.83)  | 30.40)  | -0.02)  |        | 164.08)  | 160.27)  | -0.02)  |        | 364.86)   | 242.46)   | -1.18)  |        | 7.81)   | 4.99)   | -1.22)  |        |
|                                  | 66.21)  | 67.95)  | 0.10)   |        | 321.61)  | 332.60)  | 0.11)   |        | 678.46)   | 168.71)   | -4.39)  |        | 12.36)  | 2.90)   | -4.55)  |        |
| Saint Kitts and Nevis            | (22.42, | (29.39, | (0.08,  | <0.001 | (207.45, | (238.27, | (0.09,  | <0.001 | (505.54,  | (103.39,  | (-6.08, | <0.001 | (0.24,  | (0.00,  | (-6.16, | <0.001 |
|                                  | 154.31) | 136.34) | 0.11)   |        | 477.65)  | 454.19)  | 0.13)   |        | 892.70)   | 262.27)   | -2.68)  |        | 75.02)  | 41.72)  | -2.90)  |        |
|                                  | 69.23)  | 70.63)  | 0.07)   |        | 347.31)  | 349.95)  | 0.02)   |        | 374.11)   | 161.91)   | -2.79)  |        | 6.70)   | 2.80)   | -2.90)  |        |
| Saint Lucia                      | (39.62, | (45.47, | (0.05,  | <0.001 | (272.96, | (290.76, | (0.02,  | <0.001 | (296.49,  | (122.49,  | (-3.78, | <0.001 | (0.42,  | (0.07,  | (-3.99, | <0.001 |
|                                  | 113.82) | 105.14) | 0.09)   |        | 436.41)  | 418.05)  | 0.03)   |        | 466.52)   | 210.41)   | -1.78)  |        | 31.13)  | 16.79)  | -1.80)  |        |
|                                  | 66.87)  | 67.96)  | 0.06)   |        | 330.94)  | 334.37)  | 0.04)   |        | 585.57)   | 284.14)   | -2.22)  |        | 10.49)  | 5.01)   | -2.26)  |        |
| Saint Vincent and the Grenadines | (35.85, | (37.44, | (0.01,  | 0.017  | (252.78, | (260.84, | (0.02,  | <0.001 | (480.04,  | (216.77,  | (-3.86, | 0.009  | (1.17,  | (0.15,  | (-4.01, | 0.013  |
|                                  | 115.93) | 113.77) | 0.11)   |        | 426.74)  | 422.50)  | 0.05)   |        | 708.47)   | 366.14)   | -0.55)  |        | 41.08)  | 27.57)  | -0.47)  |        |
|                                  | 32.17)  | 31.80)  | -0.04)  |        | 254.25)  | 255.36)  | 0.01)   |        | 991.27)   | 1182.68)  | 0.63)   |        | 17.93)  | 21.22)  | 0.60)   |        |
| Samoa                            | (14.48, | (16.27, | (-0.06, | <0.001 | (195.70, | (205.42, | (0.01,  | 0.001  | (871.42,  | (1072.42) | (0.57,  | <0.001 | (5.29,  | (8.86,  | (0.54,  | <0.001 |
|                                  | 63.23)  | 56.43)  | -0.03)  |        | 325.54)  | 314.00)  | 0.02)   |        | 1123.58)  | 1301.43)  | 0.69)   |        | 45.03)  | 43.05)  | 0.67)   |        |

|                       |         |         |         |        |          |          |         |        |          |          |         |        |         |         |         |        |
|-----------------------|---------|---------|---------|--------|----------|----------|---------|--------|----------|----------|---------|--------|---------|---------|---------|--------|
|                       | 36.02   | 29.96   | -0.63   |        | 184.79   | 168.36   | -0.32   |        | 119.46   | 131.59   | 0.33    |        | 2.10    | 2.35    | 0.38    |        |
| San Marino            | (3.08,  | (2.19,  | (-0.68, | <0.001 | (81.43,  | (75.30,  | (-0.37, | <0.001 | (40.86,  | (51.77,  | (0.18,  | <0.001 | (0.00,  | (0.00,  | (0.24,  | <0.001 |
|                       | 149.31) | 131.25) | -0.58)  |        | 361.25)  | 327.13)  | -0.28)  |        | 272.86)  | 277.91)  | 0.48)   |        | 89.98)  | 82.91)  | 0.52)   |        |
| Sao Tome and Principe | 31.88   | 34.48   | 0.26    |        | 199.42   | 218.31   | 0.33    |        | 251.51   | 261.65   | 0.06    |        | 4.53    | 4.51    | -0.14   |        |
|                       | (10.41, | (18.81, | (0.24,  | <0.001 | (133.08, | (174.55, | (0.27,  | <0.001 | (175.30, | (214.20, | (-0.78, | 0.889  | (0.02,  | (0.46,  | (-1.44, | 0.838  |
|                       | 77.84)  | 58.19)  | 0.28)   |        | 288.81)  | 269.80)  | 0.38)   |        | 350.90)  | 316.67)  | 0.91)   |        | 38.19)  | 17.61)  | 1.18)   |        |
| Saudi Arabia          | 40.23   | 43.55   | 0.27    |        | 259.48   | 298.58   | 0.50    |        | 451.16   | 496.90   | 0.31    |        | 8.04    | 8.81    | 0.29    |        |
|                       | (38.21, | (42.40, | (0.24,  | <0.001 | (254.22, | (295.63, | (0.39,  | <0.001 | (444.22, | (493.04, | (-0.28, | 0.307  | (7.13,  | (8.31,  | (-0.30, | 0.335  |
|                       | 42.35)  | 44.74)  | 0.30)   |        | 264.83)  | 301.56)  | 0.62)   |        | 458.19)  | 500.78)  | 0.91)   |        | 9.03)   | 9.34)   | 0.89)   |        |
| Senegal               | 35.05   | 35.92   | 0.08    |        | 221.33   | 223.95   | 0.06    |        | 280.31   | 266.19   | -0.04   |        | 4.93    | 4.63    | -0.08   |        |
|                       | (31.61, | (33.65, | (0.06,  | <0.001 | (212.23, | (218.02, | (0.00,  | 0.034  | (270.20, | (259.84, | (-0.24, | 0.659  | (3.66,  | (3.82,  | (-0.28, | 0.428  |
|                       | 38.78)  | 38.32)  | 0.10)   |        | 230.72)  | 230.00)  | 0.11)   |        | 290.71)  | 272.65)  | 0.16)   |        | 6.51)   | 5.57)   | 0.12)   |        |
| Serbia                | 38.62   | 39.22   | 0.05    |        | 254.43   | 261.36   | 0.08    |        | 640.11   | 251.25   | -3.09   |        | 11.53   | 4.46    | -3.14   |        |
|                       | (35.83, | (36.16, | (0.03,  | <0.001 | (247.27, | (253.50, | (0.02,  | 0.010  | (628.72, | (243.56, | (-3.78, | <0.001 | (10.05, | (3.49,  | (-3.85, | <0.001 |
|                       | 41.58)  | 42.48)  | 0.07)   |        | 261.75)  | 269.42)  | 0.14)   |        | 651.68)  | 259.15)  | -2.41)  |        | 13.18)  | 5.64)   | -2.43)  |        |
| Seychelles            | 30.62   | 28.60   | -0.23   |        | 212.40   | 197.55   | -0.24   |        | 716.12   | 489.10   | -1.14   |        | 12.91   | 8.63    | -1.21   |        |
|                       | (9.08,  | (11.23, | (-0.25, | <0.001 | (142.98, | (145.66, | (-0.29, | <0.001 | (582.23, | (404.31, | (-2.34, | 0.064  | (1.28,  | (1.11,  | (-2.41, | 0.051  |
|                       | 77.42)  | 63.56)  | -0.21)  |        | 305.04)  | 264.73)  | -0.20)  |        | 872.61)  | 588.84)  | 0.07)   |        | 51.93)  | 35.76)  | 0.01)   |        |
| Sierra Leone          | 37.18   | 38.24   | 0.10    |        | 223.98   | 227.68   | 0.08    |        | 280.65   | 310.26   | 0.34    |        | 4.94    | 5.44    | 0.33    |        |
|                       | (32.38, | (35.15, | (0.09,  | <0.001 | (211.70, | (219.80, | (-0.06, | 0.275  | (267.00, | (301.17, | (0.04,  | 0.025  | (3.27,  | (4.29,  | (0.02,  | 0.038  |
|                       | 42.51)  | 41.54)  | 0.11)   |        | 236.81)  | 235.78)  | 0.22)   |        | 294.84)  | 319.56)  | 0.64)   |        | 7.18)   | 6.82)   | 0.64)   |        |
| Singapore             | 37.10   | 27.96   | -0.95   |        | 184.39   | 136.57   | -1.04   |        | 316.92   | 135.70   | -2.85   |        | 5.71    | 2.41    | -2.91   |        |
|                       | (32.96, | (25.09, | (-1.04, | <0.001 | (174.96, | (130.53, | (-1.11, | <0.001 | (304.52, | (129.64, | (-4.01, | <0.001 | (4.15,  | (1.68,  | (-4.14, | <0.001 |
|                       | 41.64)  | 31.15)  | -0.87)  |        | 194.21)  | 142.91)  | -0.97)  |        | 329.71)  | 142.06)  | -1.68)  |        | 7.68)   | 3.50)   | -1.66)  |        |
| Slovakia              | 32.81   | 25.44   | -0.87   |        | 245.07   | 188.90   | -0.90   |        | 713.87   | 218.92   | -4.18   |        | 12.98   | 3.91    | -4.25   |        |
|                       | (29.50, | (22.46, | (-0.91, | <0.001 | (236.02, | (180.89, | (-0.92, | <0.001 | (698.44, | (210.34, | (-4.92, | <0.001 | (10.98, | (2.85,  | (-5.01, | <0.001 |
|                       | 36.41)  | 28.77)  | -0.84)  |        | 254.41)  | 197.25)  | -0.88)  |        | 729.57)  | 227.84)  | -3.44)  |        | 15.27)  | 5.35)   | -3.48)  |        |
| Slovenia              | 34.21   | 28.53   | -0.63   |        | 247.61   | 201.29   | -0.73   |        | 297.26   | 82.72    | -4.50   |        | 5.35    | 1.42    | -4.65   |        |
|                       | (28.83, | (23.21, | (-0.65, | <0.001 | (233.00, | (187.23, | (-0.84, | <0.001 | (281.36, | (73.95,  | (-5.09, | <0.001 | (3.41,  | (0.50,  | (-5.32, | <0.001 |
|                       | 40.36)  | 34.92)  | -0.60)  |        | 262.97)  | 216.33)  | -0.63)  |        | 313.89)  | 92.47)   | -3.92)  |        | 8.09)   | 3.63)   | -3.98)  |        |
| Solomon Islands       | 32.13   | 31.95   | -0.03   |        | 206.65   | 210.32   | 0.06    |        | 3292.17  | 3648.83  | 0.37    |        | 59.59   | 65.89   | 0.36    |        |
|                       | (18.59, | (22.58, | (-0.08, | 0.244  | (168.30, | (184.66, | (0.05,  | <0.001 | (3133.81 | (3539.58 | (0.12,  | 0.003  | (39.91, | (51.91, | (0.12,  | 0.004  |
|                       | 52.20)  | 43.97)  | 0.02)   |        | 251.36)  | 238.57)  | 0.07)   |        | ,        | ,        | 0.61)   |        | 85.84)  | 82.52)  | 0.60)   |        |

|                      |         |         |         |        |          |          |         |        |          |          |         |        |         |         |         |        |
|----------------------|---------|---------|---------|--------|----------|----------|---------|--------|----------|----------|---------|--------|---------|---------|---------|--------|
|                      |         |         |         |        |          |          |         |        | 3456.68) | 3760.62) |         |        |         |         |         |        |
|                      | 33.23   | 35.86   | 0.26    |        | 184.34   | 200.28   | 0.30    |        | 374.47   | 469.68   | 0.80    |        | 6.62    | 8.23    | 0.80    |        |
| Somalia              | (29.92, | (33.87, | (0.24,  | <0.001 | (176.45, | (195.40, | (0.24,  | <0.001 | (363.31, | (462.36, | (0.61,  | <0.001 | (5.21,  | (7.28,  | (0.64,  | <0.001 |
|                      | 36.81)  | 37.94)  | 0.28)   |        | 192.51)  | 205.25)  | 0.37)   |        | 385.91)  | 477.09)  | 0.99)   |        | 8.31)   | 9.27)   | 0.95)   |        |
|                      | 44.57   | 42.89   | -0.13   |        | 206.38   | 203.64   | -0.04   |        | 441.37   | 258.19   | -2.03   |        | 8.03    | 4.60    | -2.11   |        |
| South Africa         | (43.02, | (41.76, | (-0.15, | <0.001 | (202.93, | (201.17, | (-0.08, | 0.123  | (436.29, | (255.41, | (-3.51, | 0.008  | (7.36,  | (4.24,  | (-3.68, | 0.009  |
|                      | 46.17)  | 44.05)  | -0.11)  |        | 209.86)  | 206.14)  | 0.01)   |        | 446.50)  | 261.01)  | -0.53)  |        | 8.75)   | 5.00)   | -0.53)  |        |
|                      | 29.60   | 33.12   | 0.39    |        | 182.84   | 208.73   | 0.45    |        | 207.40   | 247.60   | 0.71    |        | 3.61    | 4.28    | 0.68    |        |
| South Sudan          | (26.32, | (30.00, | (0.38,  | <0.001 | (174.17, | (200.64, | (0.43,  | <0.001 | (198.34, | (238.98, | (0.28,  | 0.001  | (2.50,  | (3.21,  | (0.25,  | 0.002  |
|                      | 33.20)  | 36.49)  | 0.40)   |        | 191.83)  | 217.07)  | 0.48)   |        | 216.78)  | 256.46)  | 1.13)   |        | 5.08)   | 5.60)   | 1.10)   |        |
|                      | 38.61   | 34.02   | -0.44   |        | 172.87   | 170.31   | -0.04   |        | 418.73   | 139.66   | -3.79   |        | 7.37    | 2.46    | -3.78   |        |
| Spain                | (37.19, | (32.68, | (-0.48, | <0.001 | (169.83, | (167.41, | (-0.11, | 0.227  | (414.02, | (137.00, | (-4.48, | <0.001 | (6.75,  | (2.12,  | (-4.48, | <0.001 |
|                      | 40.07)  | 35.41)  | -0.41)  |        | 175.95)  | 173.26)  | 0.03)   |        | 423.48)  | 142.36)  | -3.09)  |        | 8.03)   | 2.84)   | -3.07)  |        |
|                      | 30.69   | 28.81   | -0.22   |        | 212.78   | 201.28   | -0.19   |        | 846.08   | 456.36   | -1.99   |        | 14.95   | 7.98    | -2.02   |        |
| Sri Lanka            | (28.90, | (27.17, | (-0.27, | <0.001 | (207.97, | (196.94, | (-0.22, | <0.001 | (836.51, | (449.77, | (-4.21, | 0.086  | (13.69, | (7.13,  | (-4.20, | 0.076  |
|                      | 32.58)  | 30.52)  | -0.17)  |        | 217.68)  | 205.69)  | -0.17)  |        | 855.74)  | 463.02)  | 0.29)   |        | 16.28)  | 8.90)   | 0.21)   |        |
|                      | 42.88   | 45.52   | 0.21    |        | 264.23   | 299.90   | 0.46    |        | 1540.28  | 1001.57  | -1.50   |        | 27.48   | 17.58   | -1.56   |        |
| Sudan                | (40.60, | (43.98, | (0.19,  | <0.001 | (258.39, | (295.82, | (0.31,  | <0.001 | (1526.31 | (994.26, | (-1.58, | <0.001 | (25.63, | (16.61, | (-1.64, | <0.001 |
|                      | 45.26)  | 47.11)  | 0.23)   |        | 270.16)  | 304.02)  | 0.62)   |        | ,        | 1008.91) | -1.41)  |        | 29.43)  | 18.58)  | -1.48)  |        |
|                      | 67.05   | 75.22   | 0.40    |        | 326.12   | 373.17   | 0.47    |        | 736.96   | 423.78   | -1.94   |        | 13.23   | 7.54    | -1.98   |        |
| Suriname             | (49.39, | (59.59, | (0.35,  | <0.001 | (283.64, | (337.31, | (0.44,  | <0.001 | (672.36, | (385.54, | (-3.57, | 0.022  | (5.87,  | (3.26,  | (-3.67, | 0.025  |
|                      | 89.50)  | 93.75)  | 0.44)   |        | 373.46)  | 411.87)  | 0.50)   |        | 806.36)  | 464.85)  | -0.28)  |        | 26.03)  | 14.95)  | -0.25)  |        |
|                      | 36.82   | 41.22   | 0.39    |        | 192.09   | 208.06   | 0.27    |        | 203.28   | 61.68    | -3.89   |        | 3.61    | 1.05    | -4.06   |        |
| Sweden               | (33.88, | (38.27, | (0.36,  | <0.001 | (185.34, | (201.46, | (0.23,  | <0.001 | (196.34, | (58.10,  | (-4.19, | <0.001 | (2.74,  | (0.63,  | (-4.38, | <0.001 |
|                      | 39.95)  | 44.35)  | 0.41)   |        | 199.03)  | 214.85)  | 0.32)   |        | 210.42)  | 65.45)   | -3.58)  |        | 4.69)   | 1.67)   | -3.74)  |        |
|                      | 33.91   | 28.05   | -0.65   |        | 164.99   | 149.83   | -0.33   |        | 302.05   | 71.18    | -4.97   |        | 5.35    | 1.24    | -5.01   |        |
| Switzerland          | (30.99, | (25.49, | (-0.67, | <0.001 | (158.50, | (143.97, | (-0.35, | <0.001 | (293.19, | (67.16,  | (-6.12, | <0.001 | (4.23,  | (0.77,  | (-6.23, | <0.001 |
|                      | 37.07)  | 30.83)  | -0.64)  |        | 171.71)  | 155.90)  | -0.30)  |        | 311.15)  | 75.43)   | -3.79)  |        | 6.71)   | 1.97)   | -3.78)  |        |
|                      | 40.49   | 42.49   | 0.17    |        | 268.86   | 297.36   | 0.38    |        | 2260.62  | 1321.37  | -1.81   |        | 38.84   | 22.66   | -1.87   |        |
| Syrian Arab Republic | (37.70, | (39.55, | (0.14,  | <0.001 | (261.38, | (289.59, | (0.26,  | <0.001 | (2239.96 | (1305.24 | (-2.46, | <0.001 | (36.14, | (20.59, | (-2.46, | <0.001 |
|                      | 43.45)  | 45.61)  | 0.19)   |        | 276.52)  | 305.30)  | 0.50)   |        | ,        | ,        | -1.15)  |        | 41.71)  | 24.92)  | -1.28)  |        |
|                      |         |         |         |        |          |          |         |        | 2281.45) | 1337.69) |         |        |         |         |         |        |



|                            |         |         |         |        |          |          |         |        |          |          |         |        |         |         |         |        |
|----------------------------|---------|---------|---------|--------|----------|----------|---------|--------|----------|----------|---------|--------|---------|---------|---------|--------|
| Taiwan (Province of China) | 23.87   | 22.24   | -0.24   |        | 255.92   | 272.50   | 0.20    |        | 210.71   | 192.77   | -0.33   | 3.54   | 3.29    | -0.38   |         |        |
|                            | (22.52, | (20.88, | (-0.29, | <0.001 | (251.44, | (267.76, | (-0.02, | 0.077  | (206.63, | (188.81, | (-1.02, | 0.345  | (3.03,  | (2.79,  | (-1.17, | 0.350  |
|                            | 25.29)  | 23.68)  | -0.19)  |        | 260.47)  | 277.31)  | 0.42)   |        | 214.85)  | 196.80)  | 0.36)   |        | 4.12)   | 3.86)   | 0.42)   |        |
| Tajikistan                 | 43.21   | 41.94   | -0.10   |        | 228.31   | 224.31   | -0.06   |        | 588.73   | 614.48   | 0.22    | 10.69  | 11.10   | 0.21    |         |        |
|                            | (38.97, | (39.12, | (-0.13, | <0.001 | (218.13, | (217.61, | (-0.09, | <0.001 | (572.19, | (603.37, | (-0.39, | 0.477  | (8.55,  | (9.65,  | (-0.40, | 0.508  |
|                            | 47.81)  | 44.92)  | -0.08)  |        | 238.86)  | 231.16)  | -0.03)  |        | 605.64)  | 625.75)  | 0.84)   |        | 13.22)  | 12.72)  | 0.82)   |        |
| Thailand                   | 26.78   | 25.62   | -0.16   |        | 161.68   | 157.53   | -0.08   |        | 409.15   | 456.12   | 0.52    | 7.20   | 7.99    | 0.50    |         |        |
|                            | (25.86, | (24.76, | (-0.18, | <0.001 | (159.37, | (155.42, | (-0.16, | 0.041  | (405.50, | (452.46, | (-0.30, | 0.212  | (6.72,  | (7.52,  | (-0.29, | 0.218  |
|                            | 27.73)  | 26.50)  | -0.13)  |        | 164.02)  | 159.67)  | -0.00)  |        | 412.82)  | 459.80)  | 1.34)   |        | 7.71)   | 8.49)   | 1.29)   |        |
| Timor-Leste                | 28.62   | 28.14   | -0.06   |        | 185.60   | 184.60   | -0.00   |        | 334.07   | 527.36   | 1.63    | 5.86   | 9.13    | 1.57    |         |        |
|                            | (20.64, | (21.33, | (-0.07, | <0.001 | (163.83, | (165.88, | (-0.08, | 0.958  | (304.96, | (496.61, | (0.98,  | <0.001 | (2.60,  | (5.46,  | (0.94,  | <0.001 |
|                            | 38.81)  | 36.56)  | -0.05)  |        | 209.53)  | 204.94)  | 0.08)   |        | 365.30)  | 559.63)  | 2.28)   |        | 11.52)  | 14.48)  | 2.22)   |        |
| Togo                       | 33.89   | 36.23   | 0.22    |        | 194.86   | 209.21   | 0.27    |        | 324.03   | 376.72   | 0.59    | 5.74   | 6.66    | 0.57    |         |        |
|                            | (29.09, | (33.08, | (0.15,  | <0.001 | (182.62, | (201.37, | (0.22,  | <0.001 | (308.40, | (366.29, | (0.28,  | <0.001 | (3.81,  | (5.33,  | (0.21,  | 0.002  |
|                            | 39.31)  | 39.60)  | 0.29)   |        | 207.73)  | 217.28)  | 0.33)   |        | 340.27)  | 387.37)  | 0.90)   |        | 8.33)   | 8.23)   | 0.94)   |        |
| Tokelau                    | 30.51   | 30.85   | 0.03    |        | 241.89   | 255.42   | 0.17    |        | 897.22   | 947.67   | 0.19    | 16.17  | 16.96   | 0.16    |         |        |
|                            | (0.00,  | (0.00,  | (0.00,  | 0.028  | (0.74,   | (0.82,   | (0.12,  | <0.001 | (127.91, | (136.24, | (0.13,  | <0.001 | (0.00,  | (0.00,  | (0.11,  | <0.001 |
|                            | 1642.92 | 1857.45 | 0.06)   |        | 2037.58) | 2256.95) | 0.23)   |        | 3116.82) | 3372.54) | 0.24)   |        | 1616.12 | 1831.72 | 0.22)   |        |
| Tonga                      | 31.86   | 32.15   | 0.02    |        | 267.84   | 278.74   | 0.13    |        | 666.32   | 791.62   | 0.59    | 12.04  | 14.14   | 0.55    |         |        |
|                            | (9.21,  | (10.76, | (-0.01, | 0.149  | (184.75, | (202.29, | (0.10,  | <0.001 | (529.37, | (658.87, | (0.42,  | <0.001 | (0.81,  | (2.00,  | (0.38,  | <0.001 |
|                            | 83.02)  | 74.71)  | 0.06)   |        | 377.21)  | 374.91)  | 0.15)   |        | 829.19)  | 943.62)  | 0.76)   |        | 55.12)  | 48.88)  | 0.71)   |        |
| Trinidad and Tobago        | 79.89   | 79.26   | -0.03   |        | 415.59   | 411.56   | -0.02   |        | 677.30   | 382.94   | -1.92   | 12.19  | 6.83    | -1.95   |         |        |
|                            | (69.08, | (69.14, | (-0.04, | <0.001 | (390.03, | (388.88, | (-0.05, | 0.214  | (644.52, | (361.13, | (-2.59, | <0.001 | (8.14,  | (4.21,  | (-2.64, | <0.001 |
|                            | 91.97)  | 90.57)  | -0.02)  |        | 442.42)  | 435.37)  | 0.01)   |        | 711.34)  | 405.89)  | -1.24)  |        | 17.58)  | 10.70)  | -1.25)  |        |
| Tunisia                    | 38.66   | 39.27   | 0.05    |        | 251.18   | 267.48   | 0.23    |        | 648.79   | 538.47   | -0.63   | 11.44  | 9.43    | -0.66   |         |        |
|                            | (35.57, | (36.78, | (0.03,  | <0.001 | (243.01, | (261.03, | (0.18,  | <0.001 | (635.81, | (529.17, | (-0.72, | <0.001 | (9.76,  | (8.24,  | (-0.76, | <0.001 |
|                            | 41.97)  | 41.90)  | 0.08)   |        | 259.57)  | 274.06)  | 0.28)   |        | 661.98)  | 547.91)  | -0.54)  |        | 13.34)  | 10.76)  | -0.56)  |        |
| Turkey                     | 27.07   | 22.04   | -0.71   |        | 256.90   | 209.88   | -0.65   |        | 838.13   | 267.69   | -3.88   | 15.09  | 4.70    | -3.93   |         |        |
|                            | (26.12, | (21.37, | (-0.74, | <0.001 | (253.91, | (207.81, | (-0.76, | <0.001 | (832.72, | (265.34, | (-4.29, | <0.001 | (14.37, | (4.39,  | (-4.40, | <0.001 |
|                            | 28.05)  | 22.73)  | -0.69)  |        | 259.91)  | 211.97)  | -0.53)  |        | 843.57)  | 270.05)  | -3.46)  |        | 15.84)  | 5.02)   | -3.47)  |        |
| Turkmenistan               | 43.04   | 42.88   | -0.00   |        | 219.97   | 230.11   | 0.16    |        | 1096.24  | 944.56   | -0.49   | 19.89  | 16.93   | -0.54   |         |        |
|                            | (38.19, | (39.12, | (-0.03, | 0.721  | (208.56, | (221.26, | (0.14,  | <0.001 | (1070.53 | (926.52, | (-1.60, | 0.388  | (16.54, | (14.59, | (-1.64, | 0.338  |

|                              |         |         |         |        |          |          |         |        |           |          |         |         |         |         |         |        |
|------------------------------|---------|---------|---------|--------|----------|----------|---------|--------|-----------|----------|---------|---------|---------|---------|---------|--------|
|                              | 48.37)  | 46.92)  | 0.02)   |        | 231.87)  | 239.23)  | 0.17)   |        | , 962.87) | 0.63)    |         | 23.74)  | 19.56)  | 0.57)   |         |        |
|                              |         |         |         |        |          |          |         |        | 1122.43)  |          |         |         |         |         |         |        |
|                              |         |         |         |        |          |          |         |        | 1568.75   | 1939.78  |         |         |         |         |         |        |
|                              | 31.46   | 31.88   | 0.04    |        | 223.49   | 236.73   | 0.19    |        | (1009.85  | (1418.04 | 0.71    | 28.48   | 35.05   | 0.69    |         |        |
| Tuvalu                       | (0.03,  | (0.31,  | (0.03,  | <0.001 | (53.79,  | (82.60,  | (0.18,  | <0.001 |           |          | (0.60,  | <0.001  | (0.01,  | (0.44,  | (0.58,  | <0.001 |
|                              | 306.11) | 224.18) | 0.06)   |        | 614.11)  | 534.69)  | 0.21)   |        | , ,       | 0.82)    |         | 301.73) | 230.72) | 0.80)   |         |        |
|                              |         |         |         |        |          |          |         |        | 2329.38)  | 2593.68) |         |         |         |         |         |        |
|                              | 29.22   | 29.66   | 0.05    |        | 154.44   | 158.72   | 0.10    |        | 213.31    | 324.66   | 1.41    | 3.71    | 5.63    | 1.39    |         |        |
| Uganda                       | (27.13, | (28.31, | (0.02,  | 0.001  | (149.39, | (155.44, | (0.08,  | <0.001 | (207.51,  | (320.14, | (1.12,  | <0.001  | (2.97,  | (5.04,  | (1.11,  | <0.001 |
|                              | 31.44)  | 31.07)  | 0.09)   |        | 159.64)  | 162.06)  | 0.12)   |        | 219.24)   | 329.24)  | 1.69)   |         | 4.58)   | 6.27)   | 1.68)   |        |
|                              |         |         |         |        |          |          |         |        |           | 1531.03  |         |         |         |         |         |        |
|                              | 44.15   | 43.38   | -0.07   |        | 195.93   | 182.28   | -0.25   |        | 763.16    |          | 2.41    | 13.78   | 27.36   | 2.37    |         |        |
| Ukraine                      | (42.86, | (41.98, | (-0.10, | <0.001 | (193.23, | (179.49, | (-0.26, | <0.001 | (757.81,  | (1522.75 | (0.67,  | 0.006   | (13.08, | (26.27, | (0.59,  | 0.009  |
|                              | 45.47)  | 44.81)  | -0.04)  |        | 198.66)  | 185.11)  | -0.23)  |        | 768.53)   |          | 4.18)   |         | 14.52)  | 28.49)  | 4.18)   |        |
|                              |         |         |         |        |          |          |         |        |           | 1539.35) |         |         |         |         |         |        |
|                              | 41.24   | 42.58   | 0.11    |        | 276.50   | 294.12   | 0.22    |        | 506.36    | 392.65   | -0.93   | 8.77    | 6.84    | -0.90   |         |        |
| United Arab Emirates         | (36.81, | (40.06, | (0.08,  | <0.001 | (265.27, | (288.41, | (0.16,  | <0.001 | (489.60,  | (385.04, | (-1.30, | <0.001  | (6.73,  | (5.91,  | (-1.30, | <0.001 |
|                              | 46.31)  | 45.30)  | 0.14)   |        | 288.33)  | 300.01)  | 0.29)   |        | 523.75)   | 400.47)  | -0.56)  |         | 11.52)  | 7.99)   | -0.50)  |        |
|                              | 37.10   | 30.17   | -0.71   |        | 197.40   | 159.61   | -0.73   |        | 340.02    | 181.93   | -2.13   | 6.18    | 3.26    | -2.18   |         |        |
| United Kingdom               | (35.95, | (29.20, | (-0.76, | <0.001 | (194.74, | (157.39, | (-0.78, | <0.001 | (336.52,  | (179.57, | (-2.56, | <0.001  | (5.71,  | (2.95,  | (-2.63, | <0.001 |
|                              | 38.28)  | 31.18)  | -0.67)  |        | 200.08)  | 161.86)  | -0.68)  |        | 343.54)   | 184.32)  | -1.70)  |         | 6.67)   | 3.60)   | -1.73)  |        |
|                              | 30.50   | 34.89   | 0.47    |        | 161.19   | 190.46   | 0.60    |        | 264.28    | 280.06   | 0.20    | 4.56    | 4.80    | 0.17    |         |        |
| United Republic of Tanzania  | (28.76, | (33.69, | (0.46,  | <0.001 | (157.02, | (187.55, | (0.46,  | <0.001 | (259.11,  | (276.63, | (-0.07, | 0.143   | (3.90,  | (4.36,  | (-0.11, | 0.228  |
|                              | 32.33)  | 36.14)  | 0.48)   |        | 165.44)  | 193.40)  | 0.73)   |        | 269.54)   | 283.52)  | 0.46)   |         | 5.31)   | 5.28)   | 0.44)   |        |
|                              | 44.83   | 38.77   | -0.50   |        | 191.99   | 186.62   | -0.07   |        | 345.00    | 238.92   | -1.22   | 6.21    | 4.23    | -1.27   |         |        |
| United States of America     | (44.27, | (38.27, | (-0.55, | <0.001 | (190.84, | (185.51, | (-0.26, | 0.452  | (343.46,  | (237.66, | (-1.67, | <0.001  | (6.01,  | (4.06,  | (-1.75, | <0.001 |
|                              | 45.39)  | 39.29)  | -0.45)  |        | 193.14)  | 187.73)  | 0.11)   |        | 346.55)   | 240.18)  | -0.78)  |         | 6.42)   | 4.40)   | -0.79)  |        |
|                              | 62.39   | 63.95   | 0.10    |        | 293.48   | 304.14   | 0.12    |        | 677.51    | 314.62   | -2.52   | 12.00   | 5.60    | -2.52   |         |        |
| United States Virgin Islands | (31.46, | (29.81, | (0.04,  | 0.001  | (220.22, | (222.77, | (0.11,  | <0.001 | (563.36,  | (231.84, | (-3.31, | <0.001  | (1.67,  | (0.08,  | (-3.53, | <0.001 |
|                              | 111.45) | 121.06) | 0.15)   |        | 383.82)  | 406.75)  | 0.13)   |        | 808.47)   | 418.57)  | -1.73)  |         | 42.20)  | 37.63)  | -1.50)  |        |
|                              | 25.02   | 23.07   | -0.28   |        | 130.40   | 123.72   | -0.18   |        | 344.03    | 134.95   | -2.94   | 6.22    | 2.39    | -3.02   |         |        |
| Uruguay                      | (21.02, | (19.39, | (-0.29, | <0.001 | (121.02, | (115.02, | (-0.20, | <0.001 | (328.68,  | (125.86, | (-3.34, | <0.001  | (4.31,  | (1.32,  | (-3.43, | <0.001 |
|                              | 29.56)  | 27.24)  | -0.27)  |        | 140.32)  | 132.91)  | -0.15)  |        | 359.92)   | 144.52)  | -2.54)  |         | 8.69)   | 3.98)   | -2.61)  |        |
|                              | 38.67   | 39.60   | 0.09    |        | 198.69   | 213.66   | 0.25    |        | 771.73    | 1203.01  | 1.67    | 13.98   | 21.33   | 1.60    |         |        |
| Uzbekistan                   | (36.72, | (38.15, | (0.07,  | <0.001 | (194.15, | (210.27, | (0.23,  | <0.001 | (762.76,  | (1194.97 | (1.07,  | <0.001  | (12.79, | (20.27, | (0.99,  | <0.001 |

|                |         |         |         |        |          |          |         |        |          |          |         |        |         |         |         |        |
|----------------|---------|---------|---------|--------|----------|----------|---------|--------|----------|----------|---------|--------|---------|---------|---------|--------|
|                | 40.70)  | 41.08)  | 0.10)   |        | 203.31)  | 217.10)  | 0.28)   |        | 780.79)  | ,        | 2.27)   |        | 15.25)  | 22.43)  | 2.20)   |        |
|                |         |         |         |        |          |          |         |        |          | 1211.09) |         |        |         |         |         |        |
|                |         |         |         |        |          |          |         |        | 1828.69  | 2495.48  |         |        |         |         |         |        |
|                | 35.77   | 35.53   | -0.03   |        | 261.77   | 262.39   | 0.01    |        |          |          | 1.04    |        | 33.22   | 45.12   | 1.03    |        |
| Vanuatu        | (16.53, | (21.35, | (-0.06, | 0.007  | (202.04, | (219.98, | (-0.00, | 0.107  | (1663.94 | (2360.99 | (0.89,  | <0.001 | (14.49, | (28.64, | (0.88,  | <0.001 |
|                | 68.03)  | 55.83)  | -0.01)  |        | 333.89)  | 310.71)  | 0.01)   |        | ,        | ,        | 1.19)   |        | 65.30)  | 67.77)  | 1.17)   |        |
|                |         |         |         |        |          |          |         |        | 2005.54) | 2635.76) |         |        |         |         |         |        |
| Venezuela      | 32.92   | 30.19   | -0.30   |        | 174.82   | 167.56   | -0.14   |        | 644.32   | 413.74   | -1.46   |        | 11.39   | 7.33    | -1.48   |        |
| (Bolivarian    | (31.08, | (28.72, | (-0.32, | <0.001 | (170.48, | (164.14, | (-0.23, | 0.001  | (636.04, | (408.33, | (-2.24, | <0.001 | (10.31, | (6.63,  | (-2.26, | <0.001 |
| Republic of)   | 34.83)  | 31.71)  | -0.27)  |        | 179.25)  | 171.03)  | -0.06)  |        | 652.68)  | 419.20)  | -0.68)  |        | 12.56)  | 8.09)   | -0.68)  |        |
|                | 28.20   | 26.66   | -0.19   |        | 185.88   | 180.22   | -0.10   |        | 363.66   | 250.42   | -1.28   |        | 6.43    | 4.36    | -1.33   |        |
| Viet Nam       | (27.26, | (25.98, | (-0.22, | <0.001 | (183.39, | (178.45, | (-0.13, | <0.001 | (360.21, | (248.31, | (-1.43, | <0.001 | (5.97,  | (4.09,  | (-1.50, | <0.001 |
|                | 29.17)  | 27.37)  | -0.17)  |        | 188.39)  | 182.01)  | -0.08)  |        | 367.13)  | 252.55)  | -1.13)  |        | 6.91)   | 4.65)   | -1.16)  |        |
|                |         |         |         |        |          |          |         |        | 1187.50  |          |         |        |         |         |         |        |
|                | 43.02   | 44.78   | 0.13    |        | 264.21   | 285.26   | 0.30    |        |          | 941.57   | -0.75   |        | 21.47   | 16.79   | -0.80   |        |
| Yemen          | (40.14, | (43.11, | (0.10,  | <0.001 | (256.90, | (280.97, | (0.11,  | 0.002  | (1171.96 | (933.81, | (-0.97, | <0.001 | (19.42, | (15.77, | (-1.02, | <0.001 |
|                | 46.05)  | 46.51)  | 0.16)   |        | 271.68)  | 289.59)  | 0.49)   |        | ,        | 949.39)  | -0.53)  |        | 23.69)  | 17.87)  | -0.58)  |        |
|                |         |         |         |        |          |          |         |        | 1203.19) |          |         |        |         |         |         |        |
|                | 32.03   | 32.75   | 0.07    |        | 159.87   | 165.39   | 0.11    |        | 366.10   | 364.06   | -0.02   |        | 6.39    | 6.33    | -0.03   |        |
| Zambia         | (28.81, | (30.80, | (0.06,  | <0.001 | (152.24, | (160.86, | (0.04,  | 0.003  | (354.88, | (357.48, | (-0.14, | 0.778  | (4.97,  | (5.48,  | (-0.15, | 0.632  |
|                | 35.54)  | 34.80)  | 0.09)   |        | 167.80)  | 170.03)  | 0.19)   |        | 377.60)  | 370.74)  | 0.11)   |        | 8.11)   | 7.27)   | 0.09)   |        |
|                | 37.09   | 41.54   | 0.40    |        | 183.80   | 212.22   | 0.51    |        | 150.86   | 260.23   | 1.91    |        | 2.60    | 4.54    | 1.95    |        |
| Zimbabwe       | (34.08, | (39.11, | (0.38,  | <0.001 | (176.77, | (206.57, | (0.46,  | <0.001 | (144.64, | (254.06, | (1.02,  | <0.001 | (1.83,  | (3.75,  | (1.05,  | <0.001 |
|                | 40.31)  | 44.09)  | 0.41)   |        | 191.04)  | 217.99)  | 0.56)   |        | 157.29)  | 266.51)  | 2.82)   |        | 3.59)   | 5.44)   | 2.86)   |        |
| <b>Stroke</b>  |         |         |         |        |          |          |         |        |          |          |         |        |         |         |         |        |
| <b>Overall</b> |         |         |         |        |          |          |         |        |          |          |         |        |         |         |         |        |
|                |         |         |         |        |          |          |         |        | 1101.29  |          |         |        |         |         |         |        |
|                | 57.63   | 56.66   | -0.37   |        | 530.10   | 526.19   | -0.00   |        | (1088.83 | 729.49   | -1.77   |        | 17.98   | 11.50   | -1.93   |        |
| Afghanistan    | (54.78, | (55.29, | (-0.58, | 0.002  | (521.57, | (522.09, | (-0.08, | 0.979  | (724.56, | (-2.06,  | <0.001  |        | (16.40, | (10.88, | (-2.25, | <0.001 |
|                | 60.60)  | 58.06)  | -0.15)  |        | 538.74)  | 530.32)  | 0.08)   |        | ,        | 734.45)  | -1.49)  |        | 19.68)  | 12.15)  | -1.62)  |        |
|                |         |         |         |        |          |          |         |        | 1113.86) |          |         |        |         |         |         |        |
|                | 27.03   | 26.57   | -0.04   |        | 307.82   | 302.35   | -0.03   |        | 381.23   | 348.86   | -0.23   |        | 5.37    | 4.84    | -0.26   |        |
| Albania        | (24.33, | (23.41, | (-0.11, | 0.301  | (298.47, | (291.42, | (-0.10, | 0.362  | (370.94, | (337.19, | (-0.46, | 0.043  | (4.21,  | (3.56,  | (-0.54, | 0.065  |
|                | 29.97)  | 30.05)  | 0.04)   |        | 317.40)  | 313.60)  | 0.04)   |        | 391.75)  | 360.85)  | -0.01)  |        | 6.77)   | 6.46)   | 0.02)   |        |
|                | 44.65   | 32.74   | -1.27   |        | 490.03   | 430.72   | -0.47   |        | 580.95   | 278.72   | -2.73   |        | 8.78    | 3.69    | -3.22   |        |
| Algeria        | (43.25, | (31.90, | (-1.33, | <0.001 | (485.39, | (427.68, | (-0.55, | <0.001 | (575.89, | (276.28, | (-2.88, | <0.001 | (8.16,  | (3.42,  | (-3.39, | <0.001 |

|                     |         |         |         |        |          |          |         |        |          |          |         |        |        |        |         |        |
|---------------------|---------|---------|---------|--------|----------|----------|---------|--------|----------|----------|---------|--------|--------|--------|---------|--------|
|                     | 46.10)  | 33.59)  | -1.20)  |        | 494.72)  | 433.78)  | -0.38)  |        | 586.05)  | 281.19)  | -2.58)  |        | 9.44)  | 3.98)  | -3.05)  |        |
|                     | 56.00)  | 51.85)  | -0.32)  |        | 607.11)  | 585.34)  | -0.13)  |        | 670.09)  | 600.71)  | -0.68)  |        | 9.63)  | 8.45)  | -0.85)  |        |
| American Samoa      | (27.27, | (24.36, | (-0.38, | <0.001 | (499.75, | (479.89, | (-0.19, | <0.001 | (556.88, | (493.87, | (-0.92, | <0.001 | (0.92, | (0.63, | (-1.14, | <0.001 |
|                     | 103.48) | 98.23)  | -0.25)  |        | 731.75)  | 708.13)  | -0.08)  |        | 800.58)  | 724.89)  | -0.45)  |        | 39.66) | 37.83) | -0.56)  |        |
|                     | 16.54)  | 14.69)  | -0.60)  |        | 227.99)  | 222.63)  | -0.20)  |        | 116.06)  | 77.47)   | -1.65)  |        | 1.40)  | 0.74)  | -2.55)  |        |
| Andorra             | (4.75,  | (3.93,  | (-0.70, | <0.001 | (173.56, | (169.74, | (-0.31, | 0.002  | (78.34,  | (47.92,  | (-1.77, | <0.001 | (0.00, | (0.00, | (-2.70, | <0.001 |
|                     | 44.87)  | 41.25)  | -0.50)  |        | 296.31)  | 288.76)  | -0.08)  |        | 168.09)  | 120.87)  | -1.52)  |        | 22.66) | 20.44) | -2.39)  |        |
|                     | 39.15)  | 26.00)  | -1.71)  |        | 459.43)  | 418.50)  | -0.35)  |        | 493.63)  | 321.11)  | -1.58)  |        | 7.46)  | 4.57)  | -1.79)  |        |
| Angola              | (37.10, | (25.00, | (-1.83, | <0.001 | (452.45, | (414.53, | (-0.42, | <0.001 | (486.37, | (317.61, | (-1.70, | <0.001 | (6.58, | (4.15, | (-1.94, | <0.001 |
|                     | 41.29)  | 27.02)  | -1.60)  |        | 466.50)  | 422.50)  | -0.28)  |        | 500.97)  | 324.64)  | -1.46)  |        | 8.42)  | 5.01)  | -1.65)  |        |
| Antigua and Barbuda | 33.75)  | 29.96)  | -0.52)  |        | 438.30)  | 426.26)  | -0.08)  |        | 314.15)  | 183.28)  | -2.09)  |        | 4.78)  | 2.50)  | -2.49)  |        |
|                     | (14.82, | (14.74, | (-0.65, | <0.001 | (359.88, | (360.85, | (-0.14, | 0.013  | (248.07, | (141.45, | (-2.36, | <0.001 | (0.19, | (0.04, | (-2.81, | <0.001 |
|                     | 66.52)  | 54.79)  | -0.39)  |        | 529.30)  | 500.52)  | -0.02)  |        | 392.95)  | 234.09)  | -1.81)  |        | 25.08) | 16.24) | -2.17)  |        |
|                     | 32.08)  | 21.01)  | -1.78)  |        | 298.34)  | 243.11)  | -0.83)  |        | 542.52)  | 217.95)  | -3.59)  |        | 8.57)  | 3.04)  | -4.12)  |        |
| Argentina           | (31.08, | (20.34, | (-1.94, | <0.001 | (295.25, | (240.82, | (-0.91, | <0.001 | (538.36, | (215.78, | (-3.98, | <0.001 | (8.06, | (2.79, | (-4.54, | <0.001 |
|                     | 33.11)  | 21.70)  | -1.62)  |        | 301.44)  | 245.41)  | -0.75)  |        | 546.69)  | 220.14)  | -3.20)  |        | 9.11)  | 3.31)  | -3.70)  |        |
|                     | 35.16)  | 27.38)  | -0.90)  |        | 376.47)  | 326.61)  | -0.48)  |        | 228.20)  | 139.06)  | -2.40)  |        | 2.70)  | 1.28)  | -3.42)  |        |
| Armenia             | (32.16, | (24.46, | (-0.97, | <0.001 | (366.50, | (316.43, | (-0.54, | <0.001 | (220.43, | (132.41, | (-2.81, | <0.001 | (1.92, | (0.73, | (-4.07, | <0.001 |
|                     | 38.37)  | 30.60)  | -0.82)  |        | 386.64)  | 337.08)  | -0.43)  |        | 236.18)  | 146.00)  | -2.00)  |        | 3.71)  | 2.18)  | -2.76)  |        |
|                     | 18.47)  | 16.07)  | -0.60)  |        | 257.48)  | 235.71)  | -0.19)  |        | 138.00)  | 77.03)   | -2.12)  |        | 1.66)  | 0.66)  | -3.34)  |        |
| Australia           | (17.47, | (15.24, | (-0.67, | <0.001 | (253.72, | (232.48, | (-0.30, | 0.002  | (135.25, | (75.20,  | (-2.26, | <0.001 | (1.37, | (0.50, | (-3.59, | <0.001 |
|                     | 19.51)  | 16.95)  | -0.52)  |        | 261.29)  | 238.97)  | -0.08)  |        | 140.80)  | 78.90)   | -1.98)  |        | 1.99)  | 0.86)  | -3.10)  |        |
|                     | 22.44)  | 17.34)  | -1.13)  |        | 307.19)  | 268.04)  | -0.56)  |        | 184.70)  | 72.39)   | -3.84)  |        | 2.44)  | 0.57)  | -5.83)  |        |
| Austria             | (20.78, | (15.86, | (-1.23, | <0.001 | (300.95, | (262.15, | (-0.66, | <0.001 | (179.87, | (69.35,  | (-4.07, | <0.001 | (1.91, | (0.33, | (-6.15, | <0.001 |
|                     | 24.21)  | 18.93)  | -1.03)  |        | 313.53)  | 274.05)  | -0.46)  |        | 189.64)  | 75.55)   | -3.61)  |        | 3.08)  | 0.93)  | -5.51)  |        |
|                     | 37.11)  | 29.64)  | -0.68)  |        | 375.20)  | 341.44)  | -0.24)  |        | 329.05)  | 219.15)  | -1.85)  |        | 4.49)  | 2.66)  | -2.29)  |        |
| Azerbaijan          | (34.93, | (28.06, | (-0.77, | <0.001 | (368.22, | (336.05, | (-0.32, | <0.001 | (322.48, | (214.81, | (-2.33, | <0.001 | (3.75, | (2.20, | (-2.89, | <0.001 |
|                     | 39.39)  | 31.30)  | -0.60)  |        | 382.27)  | 346.91)  | -0.17)  |        | 335.72)  | 223.56)  | -1.38)  |        | 5.35)  | 3.19)  | -1.69)  |        |
|                     | 34.12)  | 31.08)  | -0.25)  |        | 453.15)  | 424.44)  | -0.14)  |        | 366.19)  | 300.23)  | -0.97)  |        | 5.72)  | 4.62)  | -1.10)  |        |
| Bahamas             | (24.03, | (22.85, | (-0.35, | <0.001 | (414.43, | (392.27, | (-0.24, | 0.008  | (331.07, | (273.38, | (-1.21, | <0.001 | (2.12, | (1.87, | (-1.38, | <0.001 |
|                     | 47.21)  | 41.37)  | -0.14)  |        | 494.69)  | 458.60)  | -0.04)  |        | 404.19)  | 329.09)  | -0.72)  |        | 12.60) | 9.60)  | -0.81)  |        |
| Bahrain             | 30.68)  | 28.60)  | -0.49)  |        | 451.31)  | 418.45)  | -0.33)  |        | 307.57)  | 170.37)  | -2.09)  |        | 3.98)  | 1.84)  | -2.83)  |        |
|                     | (24.29, | (24.48, | (-0.66, | <0.001 | (425.77, | (402.09, | (-0.42, | <0.001 | (285.86, | (159.90, | (-2.46, | <0.001 | (1.88, | (0.92, | (-3.34, | <0.001 |

|                |         |         |         |        |          |          |         |        |          |          |         |        |         |        |         |        |
|----------------|---------|---------|---------|--------|----------|----------|---------|--------|----------|----------|---------|--------|---------|--------|---------|--------|
|                | 38.51)  | 33.33)  | -0.32)  |        | 478.20)  | 435.40)  | -0.25)  |        | 330.68)  | 181.44)  | -1.72)  |        | 7.72)   | 3.45)  | -2.31)  |        |
|                | 24.85)  | 28.76)  | 0.46)   |        | 369.91)  | 391.35)  | 0.48)   |        | 729.00)  | 466.40)  | -1.54)  |        | 11.69)  | 7.09)  | -1.77)  |        |
| Bangladesh     | (24.34, | (28.36, | (0.37,  | <0.001 | (367.97, | (389.85, | (0.21,  | 0.001  | (726.25, | (464.75, | (-1.73, | <0.001 | (11.34, | (6.89, | (-1.98, | <0.001 |
|                | 25.37)  | 29.18)  | 0.56)   |        | 371.85)  | 392.86)  | 0.74)   |        | 731.75)  | 468.05)  | -1.35)  |        | 12.04)  | 7.30)  | -1.55)  |        |
|                | 33.69)  | 30.93)  | -0.35)  |        | 466.36)  | 452.84)  | -0.11)  |        | 291.49)  | 193.30)  | -2.06)  |        | 4.34)   | 2.65)  | -2.43)  |        |
| Barbados       | (23.69, | (21.12, | (-0.50, | <0.001 | (426.76, | (412.40, | (-0.18, | 0.010  | (260.35, | (167.32, | (-2.34, | <0.001 | (1.36,  | (0.49, | (-2.75, | <0.001 |
|                | 46.55)  | 43.91)  | -0.20)  |        | 508.70)  | 496.32)  | -0.03)  |        | 325.39)  | 222.31)  | -1.79)  |        | 10.47)  | 8.40)  | -2.11)  |        |
|                | 35.85)  | 32.22)  | -0.04)  |        | 372.51)  | 363.25)  | 0.06)   |        | 285.15)  | 236.61)  | -0.79)  |        | 3.76)   | 2.96)  | -0.96)  |        |
| Belarus        | (34.04, | (30.32, | (-0.25, | 0.660  | (366.64, | (356.75, | (-0.02, | 0.122  | (280.03, | (231.51, | (-1.44, | 0.021  | (3.20,  | (2.43, | (-1.83, | 0.032  |
|                | 37.73)  | 34.24)  | 0.16)   |        | 378.46)  | 369.85)  | 0.13)   |        | 290.36)  | 241.80)  | -0.13)  |        | 4.40)   | 3.60)  | -0.09)  |        |
|                | 18.50)  | 14.10)  | -1.22)  |        | 243.60)  | 240.25)  | 0.04)   |        | 231.38)  | 87.97)   | -3.44)  |        | 3.33)   | 0.89)  | -4.74)  |        |
| Belgium        | (17.16, | (12.91, | (-1.34, | <0.001 | (238.69, | (235.24, | (-0.10, | 0.520  | (226.59, | (84.96,  | (-3.68, | <0.001 | (2.78,  | (0.61, | (-4.98, | <0.001 |
|                | 19.92)  | 15.38)  | -1.10)  |        | 248.58)  | 245.35)  | 0.18)   |        | 236.26)  | 91.07)   | -3.19)  |        | 3.97)   | 1.26)  | -4.50)  |        |
|                | 28.41)  | 30.61)  | 0.28)   |        | 405.29)  | 429.54)  | 0.25)   |        | 223.96)  | 235.59)  | -1.04)  |        | 3.20)   | 3.40)  | -1.32)  |        |
| Belize         | (16.72, | (22.83, | (0.17,  | <0.001 | (357.24, | (398.96, | (0.21,  | <0.001 | (188.66, | (212.98, | (-1.47, | <0.001 | (0.38,  | (1.20, | (-1.82, | <0.001 |
|                | 45.73)  | 40.25)  | 0.38)   |        | 458.48)  | 461.90)  | 0.30)   |        | 264.45)  | 260.00)  | -0.62)  |        | 12.58)  | 7.64)  | -0.82)  |        |
|                | 35.92)  | 31.34)  | -0.55)  |        | 465.62)  | 441.39)  | -0.11)  |        | 369.22)  | 323.96)  | -0.57)  |        | 5.38)   | 4.61)  | -0.69)  |        |
| Benin          | (32.97, | (29.67, | (-0.59, | <0.001 | (454.92, | (435.16, | (-0.21, | 0.031  | (359.58, | (318.57, | (-0.67, | <0.001 | (4.26,  | (3.98, | (-0.81, | <0.001 |
|                | 39.09)  | 33.09)  | -0.50)  |        | 476.52)  | 447.69)  | -0.01)  |        | 379.06)  | 329.43)  | -0.47)  |        | 6.71)   | 5.31)  | -0.57)  |        |
|                | 30.91)  | 29.80)  | -0.18)  |        | 434.36)  | 406.68)  | -0.25)  |        | 175.24)  | 85.69)   | -2.82)  |        | 2.33)   | 0.83)  | -4.23)  |        |
| Bermuda        | (13.63, | (10.68, | (-0.33, | 0.013  | (358.76, | (320.95, | (-0.30, | <0.001 | (128.72, | (49.37,  | (-3.07, | <0.001 | (0.01,  | (0.00, | (-4.54, | <0.001 |
|                | 63.46)  | 69.71)  | -0.04)  |        | 523.31)  | 510.60)  | -0.20)  |        | 235.49)  | 141.37)  | -2.57)  |        | 23.84)  | 27.55) | -3.92)  |        |
|                | 27.81)  | 20.59)  | -1.28)  |        | 329.50)  | 301.89)  | -0.27)  |        | 268.36)  | 160.65)  | -2.10)  |        | 3.83)   | 1.96)  | -2.69)  |        |
| Bhutan         | (21.19, | (16.10, | (-1.42, | <0.001 | (305.95, | (283.94, | (-0.41, | 0.001  | (246.81, | (147.62, | (-2.23, | <0.001 | (1.64,  | (0.78, | (-2.84, | <0.001 |
|                | 35.97)  | 25.98)  | -1.15)  |        | 354.50)  | 320.70)  | -0.13)  |        | 291.40)  | 174.56)  | -1.97)  |        | 7.73)   | 4.13)  | -2.53)  |        |
|                | 51.98)  | 33.39)  | -1.78)  |        | 521.43)  | 433.14)  | -0.66)  |        | 677.87)  | 319.82)  | -2.77)  |        | 10.71)  | 4.74)  | -2.99)  |        |
| Bolivia        | (49.05, | (31.77, | (-1.95, | <0.001 | (512.03, | (427.22, | (-0.76, | <0.001 | (667.27, | (314.75, | (-2.87, | <0.001 | (9.40,  | (4.14, | (-3.10, | <0.001 |
| (Plurinational | 55.03)  | 35.09)  | -1.61)  |        | 530.97)  | 439.12)  | -0.56)  |        | 688.61)  | 324.95)  | -2.67)  |        | 12.15)  | 5.40)  | -2.89)  |        |
| State of)      | 33.55)  | 35.32)  | 0.41)   |        | 371.23)  | 394.35)  | 0.29)   |        | 307.10)  | 234.52)  | -1.51)  |        | 4.07)   | 2.69)  | -2.24)  |        |
| Bosnia and     | (31.03, | (31.88, | (0.32,  | <0.001 | (362.74, | (382.69, | (0.24,  | <0.001 | (299.38, | (225.49, | (-1.78, | <0.001 | (3.23,  | (1.81, | (-2.58, | <0.001 |
| Herzegovina    | 36.22)  | 39.06)  | 0.50)   |        | 379.88)  | 406.30)  | 0.33)   |        | 314.98)  | 243.84)  | -1.25)  |        | 5.07)   | 3.88)  | -1.89)  |        |
|                | 33.53)  | 25.05)  | -1.60)  |        | 490.67)  | 460.12)  | -0.28)  |        | 409.56)  | 303.87)  | -2.00)  |        | 5.99)   | 4.21)  | -2.34)  |        |
| Botswana       | (28.29, | (22.16, | (-1.89, | <0.001 | (470.43, | (447.35, | (-0.36, | <0.001 | (390.83, | (293.54, | (-2.50, | <0.001 | (3.89,  | (3.08, | (-2.94, | <0.001 |

|                             |         |         |         |        |          |          |         |        |          |          |         |        |         |        |         |        |
|-----------------------------|---------|---------|---------|--------|----------|----------|---------|--------|----------|----------|---------|--------|---------|--------|---------|--------|
|                             | 39.51)  | 28.24)  | -1.30)  |        | 511.61)  | 473.17)  | -0.19)  |        | 429.01)  | 314.49)  | -1.49)  |        | 8.86)   | 5.64)  | -1.74)  |        |
|                             | 52.45)  | 29.42)  | -2.45)  |        | 574.77)  | 451.25)  | -1.03)  |        | 627.59)  | 236.04)  | -3.56)  |        | 10.23)  | 3.40)  | -4.01)  |        |
| Brazil                      | (51.86, | (29.06, | (-2.75, | <0.001 | (572.84, | (449.85, | (-1.25, | <0.001 | (625.55, | (235.03, | (-3.81, | <0.001 | (9.97,  | (3.28, | (-4.25, | <0.001 |
|                             | 53.04)  | 29.78)  | -2.15)  |        | 576.71)  | 452.65)  | -0.80)  |        | 629.64)  | 237.05)  | -3.32)  |        | 10.50)  | 3.53)  | -3.77)  |        |
|                             | 35.07)  | 21.21)  | -2.11)  |        | 344.63)  | 297.44)  | -0.56)  |        | 409.47)  | 162.25)  | -3.91)  |        | 6.10)   | 1.93)  | -4.92)  |        |
| Brunei Darussalam           | (25.33, | (15.49, | (-2.34, | <0.001 | (312.49, | (274.57, | (-0.74, | <0.001 | (374.32, | (145.60, | (-4.28, | <0.001 | (2.53,  | (0.55, | (-5.34, | <0.001 |
|                             | 47.42)  | 28.54)  | -1.88)  |        | 379.28)  | 321.84)  | -0.37)  |        | 447.12)  | 180.44)  | -3.53)  |        | 12.46)  | 5.16)  | -4.50)  |        |
|                             | 39.25)  | 32.10)  | -0.78)  |        | 431.37)  | 397.01)  | -0.28)  |        | 540.51)  | 361.78)  | -2.07)  |        | 8.00)   | 5.00)  | -2.45)  |        |
| Bulgaria                    | (37.07, | (29.75, | (-0.82, | <0.001 | (424.06, | (388.58, | (-0.39, | <0.001 | (532.35, | (353.80, | (-2.32, | <0.001 | (7.04,  | (4.11, | (-2.75, | <0.001 |
|                             | 41.52)  | 34.60)  | -0.73)  |        | 438.78)  | 405.61)  | -0.16)  |        | 548.77)  | 369.93)  | -1.82)  |        | 9.06)   | 6.04)  | -2.14)  |        |
|                             | 26.75)  | 25.21)  | -0.20)  |        | 390.72)  | 375.09)  | -0.08)  |        | 326.22)  | 310.52)  | -0.10)  |        | 4.80)   | 4.52)  | -0.14)  |        |
| Burkina Faso                | (24.85, | (24.09, | (-0.31, | 0.001  | (383.45, | (370.80, | (-0.15, | 0.042  | (319.45, | (306.56, | (-0.24, | 0.122  | (4.00,  | (4.05, | (-0.29, | 0.074  |
|                             | 28.77)  | 26.36)  | -0.09)  |        | 398.10)  | 379.43)  | -0.00)  |        | 333.11)  | 314.51)  | 0.03)   |        | 5.72)   | 5.03)  | 0.01)   |        |
|                             | 53.75)  | 26.29)  | -2.99)  |        | 601.12)  | 492.16)  | -0.77)  |        | 810.81)  | 423.40)  | -2.66)  |        | 12.64)  | 6.16)  | -2.94)  |        |
| Burundi                     | (50.44, | (24.76, | (-3.25, | <0.001 | (590.14, | (485.56, | (-0.90, | <0.001 | (797.97, | (417.22, | (-2.90, | <0.001 | (11.07, | (5.43, | (-3.20, | <0.001 |
|                             | 57.23)  | 27.90)  | -2.73)  |        | 612.25)  | 498.83)  | -0.64)  |        | 823.82)  | 429.65)  | -2.41)  |        | 14.39)  | 6.97)  | -2.68)  |        |
|                             | 38.49)  | 30.37)  | -0.93)  |        | 493.24)  | 460.28)  | -0.19)  |        | 498.86)  | 250.73)  | -2.18)  |        | 7.58)   | 3.25)  | -2.59)  |        |
| Cabo Verde                  | (27.37, | (23.91, | (-0.98, | <0.001 | (451.75, | (434.03, | (-0.22, | <0.001 | (456.27, | (231.46, | (-2.36, | <0.001 | (3.14,  | (1.41, | (-2.83, | <0.001 |
|                             | 53.11)  | 38.07)  | -0.87)  |        | 537.94)  | 487.75)  | -0.15)  |        | 544.73)  | 271.23)  | -2.00)  |        | 15.91)  | 6.44)  | -2.34)  |        |
|                             | 38.77)  | 28.83)  | -1.25)  |        | 379.11)  | 354.60)  | -0.23)  |        | 576.14)  | 338.41)  | -2.05)  |        | 8.84)   | 4.70)  | -2.40)  |        |
| Cambodia                    | (36.68, | (27.59, | (-1.33, | <0.001 | (372.58, | (350.22, | (-0.37, | 0.001  | (567.97, | (334.10, | (-2.17, | <0.001 | (7.84,  | (4.20, | (-2.55, | <0.001 |
|                             | 40.96)  | 30.12)  | -1.16)  |        | 385.72)  | 359.03)  | -0.10)  |        | 584.41)  | 342.75)  | -1.93)  |        | 9.93)   | 5.24)  | -2.27)  |        |
|                             | 32.63)  | 32.23)  | -0.28)  |        | 428.37)  | 432.09)  | 0.00)   |        | 442.69)  | 408.73)  | -0.52)  |        | 6.72)   | 6.10)  | -0.61)  |        |
| Cameroon                    | (30.71, | (31.17, | (-0.56, | 0.057  | (421.40, | (428.22, | (-0.10, | 0.964  | (435.51, | (404.93, | (-0.79, | 0.001  | (5.85,  | (5.64, | (-0.91, | <0.001 |
|                             | 34.64)  | 33.32)  | 0.01)   |        | 435.43)  | 435.98)  | 0.10)   |        | 449.96)  | 412.54)  | -0.25)  |        | 7.69)   | 6.58)  | -0.31)  |        |
|                             | 15.76)  | 13.55)  | -0.53)  |        | 357.75)  | 312.48)  | -0.33)  |        | 156.73)  | 91.64)   | -1.87)  |        | 1.78)   | 0.75)  | -3.10)  |        |
| Canada                      | (15.04, | (12.89, | (-0.68, | <0.001 | (354.29, | (309.31, | (-0.61, | 0.020  | (154.46, | (89.93,  | (-2.09, | <0.001 | (1.55,  | (0.61, | (-3.36, | <0.001 |
|                             | 16.50)  | 14.23)  | -0.38)  |        | 361.23)  | 315.68)  | -0.06)  |        | 159.02)  | 93.37)   | -1.66)  |        | 2.04)   | 0.93)  | -2.83)  |        |
|                             | 40.95)  | 39.76)  | -0.21)  |        | 450.64)  | 437.91)  | -0.08)  |        | 570.15)  | 506.24)  | -0.46)  |        | 8.82)   | 7.76)  | -0.50)  |        |
| Central African<br>Republic | (36.84, | (36.90, | (-0.26, | <0.001 | (437.10, | (428.52, | (-0.14, | 0.029  | (554.79, | (496.08, | (-0.56, | <0.001 | (6.98,  | (6.53, | (-0.61, | <0.001 |
|                             | 45.42)  | 42.79)  | -0.15)  |        | 464.54)  | 447.46)  | -0.01)  |        | 585.85)  | 516.57)  | -0.36)  |        | 11.02)  | 9.15)  | -0.40)  |        |
|                             | 34.11)  | 33.99)  | -0.09)  |        | 437.10)  | 445.41)  | 0.15)   |        | 447.99)  | 422.36)  | -0.22)  |        | 6.77)   | 6.29)  | -0.29)  |        |
| Chad                        | (31.48, | (32.35, | (-0.20, | 0.133  | (427.68, | (439.52, | (0.09,  | <0.001 | (438.36, | (416.57, | (-0.39, | 0.011  | (5.63,  | (5.59, | (-0.48, | 0.004  |

|               |         |         |         |         |          |          |         |         |          |          |         |         |        |        |         |         |
|---------------|---------|---------|---------|---------|----------|----------|---------|---------|----------|----------|---------|---------|--------|--------|---------|---------|
|               | 36.90)  | 35.70)  | 0.03)   |         | 446.68)  | 451.36)  | 0.21)   |         | 457.78)  | 428.22)  | -0.06)  |         | 8.10)  | 7.06)  | -0.10)  |         |
|               | 24.44)  | 21.09)  | -0.28)  |         | 300.89)  | 273.23)  | -0.12)  |         | 250.44)  | 147.80)  | -1.52)  |         | 3.49)  | 1.80)  | -1.92)  |         |
| Chile         | (23.15, | (20.02, | (-0.53, | 0.030)  | (296.32, | (269.37, | (-0.30, | 0.164)  | (246.28, | (144.96, | (-1.65, | <0.001) | (3.01, | (1.50, | (-2.07, | <0.001) |
|               | 25.79)  | 22.20)  | -0.03)  |         | 305.51)  | 277.14)  | 0.05)   |         | 254.66)  | 150.69)  | -1.39)  |         | 4.03)  | 2.14)  | -1.78)  |         |
|               | 28.76)  | 23.59)  | -1.23)  |         | 352.47)  | 315.25)  | -0.59)  |         | 491.25)  | 318.68)  | -1.76)  |         | 7.27)  | 4.38)  | -2.01)  |         |
| China         | (28.62, | (23.45, | (-1.44, | <0.001) | (351.96, | (314.77, | (-0.85, | <0.001) | (490.65, | (318.20, | (-1.97, | <0.001) | (7.20, | (4.32, | (-2.24, | <0.001) |
|               | 28.91)  | 23.72)  | -1.02)  |         | 352.98)  | 315.74)  | -0.33)  |         | 491.85)  | 319.16)  | -1.55)  |         | 7.35)  | 4.43)  | -1.79)  |         |
|               | 34.34)  | 23.81)  | -1.54)  |         | 454.15)  | 386.63)  | -0.53)  |         | 348.16)  | 166.20)  | -2.64)  |         | 5.28)  | 2.23)  | -3.08)  |         |
| Colombia      | (33.34, | (23.13, | (-1.77, | <0.001) | (450.51, | (383.85, | (-0.66, | <0.001) | (344.96, | (164.37, | (-2.96, | <0.001) | (4.89, | (2.02, | (-3.44, | <0.001) |
|               | 35.37)  | 24.52)  | -1.30)  |         | 457.81)  | 389.42)  | -0.41)  |         | 351.37)  | 168.03)  | -2.32)  |         | 5.69)  | 2.45)  | -2.73)  |         |
|               | 51.55)  | 28.77)  | -2.34)  |         | 642.77)  | 505.67)  | -0.98)  |         | 514.07)  | 327.85)  | -2.08)  |         | 7.45)  | 4.50)  | -2.30)  |         |
| Comoros       | (40.30, | (22.82, | (-2.54, | <0.001) | (602.49, | (479.91, | (-1.11, | <0.001) | (477.64, | (307.04, | (-2.69, | <0.001) | (3.63, | (2.36, | (-3.00, | <0.001) |
|               | 65.13)  | 35.83)  | -2.14)  |         | 685.23)  | 532.51)  | -0.85)  |         | 552.71)  | 349.73)  | -1.47)  |         | 13.79) | 7.82)  | -1.60)  |         |
|               | 50.35)  | 27.65)  | -2.49)  |         | 546.07)  | 446.01)  | -0.75)  |         | 623.79)  | 326.66)  | -2.52)  |         | 9.60)  | 4.65)  | -2.81)  |         |
| Congo         | (45.48, | (25.42, | (-2.63, | <0.001) | (530.14, | (436.95, | (-0.85, | <0.001) | (606.61, | (318.90, | (-2.75, | <0.001) | (7.55, | (3.76, | (-3.07, | <0.001) |
|               | 55.62)  | 30.02)  | -2.34)  |         | 562.38)  | 455.21)  | -0.66)  |         | 641.35)  | 334.57)  | -2.28)  |         | 12.06) | 5.68)  | -2.54)  |         |
|               | 51.55)  | 50.84)  | -0.18)  |         | 571.28)  | 567.50)  | -0.05)  |         | 668.64)  | 456.62)  | -1.32)  |         | 9.63)  | 5.99)  | -1.70)  |         |
| Cook Islands  | (13.01, | (10.22, | (-0.37, | 0.052)  | (409.01, | (389.92, | (-0.13, | 0.274)  | (492.56, | (299.09, | (-1.64, | <0.001) | (0.05, | (0.00, | (-2.10, | <0.001) |
|               | 142.24) | 151.83) | 0.00)   |         | 779.63)  | 799.12)  | 0.04)   |         | 890.38)  | 668.56)  | -0.99)  |         | 77.70) | 78.30) | -1.29)  |         |
|               | 28.01)  | 25.50)  | -0.35)  |         | 424.64)  | 409.37)  | -0.09)  |         | 205.91)  | 138.19)  | -1.53)  |         | 2.89)  | 1.72)  | -1.99)  |         |
| Costa Rica    | (25.11, | (23.31, | (-0.52, | <0.001) | (413.17, | (400.43, | (-0.15, | 0.004)  | (197.88, | (133.03, | (-1.94, | <0.001) | (2.00, | (1.19, | (-2.52, | <0.001) |
|               | 31.17)  | 27.86)  | -0.19)  |         | 436.36)  | 418.46)  | -0.03)  |         | 214.19)  | 143.52)  | -1.12)  |         | 4.05)  | 2.42)  | -1.46)  |         |
|               | 42.78)  | 35.11)  | -0.94)  |         | 519.52)  | 478.00)  | -0.33)  |         | 514.70)  | 389.06)  | -1.16)  |         | 7.72)  | 5.62)  | -1.29)  |         |
| Cote d'Ivoire | (40.80, | (33.96, | (-1.10, | <0.001) | (512.65, | (473.79, | (-0.40, | <0.001) | (507.83, | (385.25, | (-1.37, | <0.001) | (6.89, | (5.17, | (-1.53, | <0.001) |
|               | 44.84)  | 36.28)  | -0.78)  |         | 526.47)  | 482.23)  | -0.27)  |         | 521.63)  | 392.89)  | -0.94)  |         | 8.63)  | 6.10)  | -1.05)  |         |
|               | 27.15)  | 20.55)  | -1.27)  |         | 331.72)  | 279.69)  | -0.72)  |         | 308.89)  | 129.89)  | -3.37)  |         | 4.29)  | 1.25)  | -4.67)  |         |
| Croatia       | (24.87, | (18.22, | (-1.46, | <0.001) | (323.60, | (270.93, | (-0.87, | <0.001) | (301.10, | (123.96, | (-3.54, | <0.001) | (3.42, | (0.74, | (-4.91, | <0.001) |
|               | 29.60)  | 23.13)  | -1.07)  |         | 340.00)  | 288.69)  | -0.58)  |         | 316.84)  | 136.07)  | -3.20)  |         | 5.32)  | 2.03)  | -4.43)  |         |
|               | 34.67)  | 28.71)  | -0.78)  |         | 452.36)  | 401.68)  | -0.41)  |         | 296.52)  | 149.99)  | -2.72)  |         | 4.48)  | 1.98)  | -3.28)  |         |
| Cuba          | (32.95, | (27.01, | (-0.92, | <0.001) | (446.16, | (395.24, | (-0.52, | <0.001) | (291.44, | (146.08, | (-3.00, | <0.001) | (3.87, | (1.56, | (-3.60, | <0.001) |
|               | 36.47)  | 30.49)  | -0.64)  |         | 458.64)  | 408.20)  | -0.30)  |         | 301.68)  | 153.98)  | -2.44)  |         | 5.17)  | 2.50)  | -2.96)  |         |
|               | 16.87)  | 14.97)  | -0.74)  |         | 238.97)  | 257.02)  | 0.29)   |         | 136.60)  | 79.57)   | -2.71)  |         | 1.72)  | 0.71)  | -4.08)  |         |
| Cyprus        | (12.61, | (11.83, | (-0.86, | <0.001) | (222.11, | (243.41, | (0.16,  | <0.001) | (123.88, | (72.05,  | (-3.08, | <0.001) | (0.59, | (0.18, | (-4.70, | <0.001) |

|                   |         |         |         |        |          |          |         |        |           |          |         |        |         |        |         |        |
|-------------------|---------|---------|---------|--------|----------|----------|---------|--------|-----------|----------|---------|--------|---------|--------|---------|--------|
|                   | 22.15)  | 18.88)  | -0.61)  |        | 256.81)  | 271.34)  | 0.42)   |        | 150.31)   | 87.82)   | -2.33)  |        | 4.00)   | 2.21)  | -3.46)  |        |
|                   | 30.63)  | 24.82)  | -0.95)  |        | 364.62)  | 317.75)  | -0.54)  |        | 271.99)   | 113.58)  | -3.43)  |        | 3.50)   | 0.85)  | -5.38)  |        |
| Czechia           | (28.91, | (23.13, | (-1.16, | <0.001 | (358.59, | (311.68, | (-0.65, | <0.001 | (266.80,  | (109.96, | (-3.63, | <0.001 | (2.94,  | (0.58, | (-5.58, | <0.001 |
|                   | 32.44)  | 26.61)  | -0.73)  |        | 370.73)  | 323.92)  | -0.42)  |        | 277.26)   | 117.32)  | -3.23)  |        | 4.14)   | 1.25)  | -5.18)  |        |
| Democratic        | 41.41)  | 41.18)  | -0.04)  |        | 385.00)  | 388.22)  | 0.08)   |        | 602.41)   | 567.94)  | -0.14)  |        | 9.12)   | 8.49)  | -0.20)  |        |
| People's Republic | (39.99, | (39.95, | (-0.16, | 0.504  | (380.65, | (384.44, | (0.02,  | 0.010  | (596.95,  | (563.37, | (-0.26, | 0.019  | (8.46,  | (7.94, | (-0.34, | 0.006  |
| of Korea          | 42.87)  | 42.43)  | 0.08)   |        | 389.38)  | 392.04)  | 0.14)   |        | 607.91)   | 572.55)  | -0.03)  |        | 9.83)   | 9.07)  | -0.06)  |        |
| Democratic        | 29.84)  | 23.68)  | -0.96)  |        | 393.56)  | 354.20)  | -0.36)  |        | 406.83)   | 297.56)  | -1.12)  |        | 6.12)   | 4.32)  | -1.25)  |        |
| Republic of the   | (28.88, | (23.14, | (-1.04, | <0.001 | (390.12, | (352.13, | (-0.46, | <0.001 | (403.31,  | (295.64, | (-1.17, | <0.001 | (5.69,  | (4.09, | (-1.31, | <0.001 |
| Congo             | 30.82)  | 24.23)  | -0.88)  |        | 397.03)  | 356.28)  | -0.27)  |        | 410.39)   | 299.48)  | -1.07)  |        | 6.58)   | 4.56)  | -1.18)  |        |
|                   | 20.89)  | 14.12)  | -1.53)  |        | 296.03)  | 253.73)  | -0.57)  |        | 191.14)   | 76.14)   | -3.73)  |        | 2.63)   | 0.68)  | -5.38)  |        |
| Denmark           | (18.92, | (12.44, | (-1.65, | <0.001 | (288.43, | (246.47, | (-0.66, | <0.001 | (185.08,  | (72.19,  | (-3.95, | <0.001 | (1.96,  | (0.35, | (-5.74, | <0.001 |
|                   | 23.03)  | 15.97)  | -1.40)  |        | 303.78)  | 261.16)  | -0.48)  |        | 197.35)   | 80.25)   | -3.51)  |        | 3.46)   | 1.19)  | -5.01)  |        |
|                   | 35.87)  | 26.42)  | -1.21)  |        | 516.00)  | 505.75)  | 0.01)   |        | 449.83)   | 323.03)  | -1.29)  |        | 6.60)   | 4.40)  | -1.58)  |        |
| Djibouti          | (27.36, | (22.16, | (-1.35, | <0.001 | (482.88, | (486.42, | (-0.10, | 0.914  | (418.64,  | (307.63, | (-1.44, | <0.001 | (3.29,  | (2.78, | (-1.74, | <0.001 |
|                   | 46.33)  | 31.28)  | -1.08)  |        | 550.93)  | 525.67)  | 0.11)   |        | 482.87)   | 339.01)  | -1.15)  |        | 11.99)  | 6.65)  | -1.42)  |        |
|                   | 32.38)  | 29.34)  | -0.44)  |        | 437.86)  | 430.86)  | -0.01)  |        | 272.28)   | 197.23)  | -1.85)  |        | 4.06)   | 2.76)  | -2.28)  |        |
| Dominica          | (14.21, | (12.28, | (-0.52, | <0.001 | (361.49, | (354.34, | (-0.09, | 0.812  | (212.18,  | (146.67, | (-2.14, | <0.001 | (0.11,  | (0.02, | (-2.66, | <0.001 |
|                   | 64.15)  | 59.11)  | -0.35)  |        | 526.40)  | 519.11)  | 0.07)   |        | 344.85)   | 259.69)  | -1.56)  |        | 23.74)  | 19.93) | -1.90)  |        |
|                   | 35.59)  | 37.71)  | 0.18)   |        | 414.98)  | 429.18)  | 0.18)   |        | 413.11)   | 391.61)  | -0.03)  |        | 6.52)   | 6.18)  | -0.01)  |        |
| Dominican         | (33.35, | (35.91, | (0.12,  | <0.001 | (407.35, | (423.10, | (0.12,  | <0.001 | (405.45,  | (385.79, | (-0.34, | 0.865  | (5.58,  | (5.47, | (-0.35, | 0.969  |
| Republic          | 37.96)  | 39.57)  | 0.24)   |        | 422.73)  | 435.33)  | 0.24)   |        | 420.88)   | 397.50)  | 0.29)   |        | 7.58)   | 6.96)  | 0.34)   |        |
|                   | 43.47)  | 32.81)  | -1.10)  |        | 499.30)  | 454.28)  | -0.35)  |        | 544.20)   | 320.79)  | -2.13)  |        | 8.46)   | 4.71)  | -2.35)  |        |
| Ecuador           | (41.38, | (31.48, | (-1.21, | <0.001 | (492.15, | (449.30, | (-0.38, | <0.001 | (536.81,  | (316.63, | (-2.38, | <0.001 | (7.56,  | (4.22, | (-2.62, | <0.001 |
|                   | 45.63)  | 34.17)  | -0.99)  |        | 506.53)  | 459.29)  | -0.31)  |        | 551.66)   | 324.99)  | -1.88)  |        | 9.45)   | 5.25)  | -2.08)  |        |
|                   |         |         |         |        |          |          |         |        | 1022.02)  |          |         |        |         |        |         |        |
|                   | 37.15)  | 36.20)  | 0.08)   |        | 450.28)  | 468.55)  | 0.37)   |        | (1017.73) | 651.05)  | -1.08)  |        | 15.66)  | 9.52)  | -1.24)  |        |
| Egypt             | (36.31, | (35.61, | (-0.06, | 0.234  | (447.36, | (466.44, | (0.25,  | <0.001 | (648.58,  | (648.58, | (-1.42, | <0.001 | (15.13, | (9.22, | (-1.61, | <0.001 |
|                   | 38.00)  | 36.79)  | 0.22)   |        | 453.22)  | 470.66)  | 0.49)   |        | 1026.32)  | 653.53)  | -0.73)  |        | 16.20)  | 9.82)  | -0.87)  |        |
|                   | 31.37)  | 24.05)  | -1.14)  |        | 398.19)  | 376.90)  | -0.17)  |        | 661.87)   | 211.86)  | -4.39)  |        | 10.45)  | 3.00)  | -4.90)  |        |
| El Salvador       | (28.85, | (22.14, | (-1.34, | <0.001 | (389.07, | (369.25, | (-0.27, | 0.001  | (650.34,  | (206.13, | (-5.13, | <0.001 | (9.03,  | (2.35, | (-5.69, | <0.001 |
|                   | 34.07)  | 26.09)  | -0.93)  |        | 407.47)  | 384.68)  | -0.08)  |        | 673.57)   | 217.71)  | -3.64)  |        | 12.04)  | 3.78)  | -4.10)  |        |
| Equatorial Guinea | 44.23)  | 21.32)  | -2.83)  | <0.001 | 489.96)  | 401.93)  | -0.72)  | <0.001 | 554.23)   | 209.79)  | -3.72)  | <0.001 | 8.46)   | 2.69)  | -4.40)  | <0.001 |



|          |         |         |         |        |          |          |         |        |          |          |         |        |        |        |         |        |
|----------|---------|---------|---------|--------|----------|----------|---------|--------|----------|----------|---------|--------|--------|--------|---------|--------|
|          | (33.61, | (17.64, | (-3.13, |        | (453.39, | (385.62, | (-0.84, |        | (515.28, | (197.93, | (-4.06, |        | (4.26, | (1.48, | (-4.77, |        |
|          | 57.27)  | 25.59)  | -2.53)  |        | 528.81)  | 418.82)  | -0.60)  |        | 595.48)  | 222.22)  | -3.38)  |        | 15.19) | 4.54)  | -4.04)  |        |
|          | 45.50   | 26.67   | -2.10   |        | 498.99   | 437.25   | -0.48   |        | 622.75   | 430.27   | -1.38   |        | 9.67   | 6.45   | -1.50   |        |
| Eritrea  | (41.35, | (24.71, | (-2.24, | <0.001 | (485.40, | (429.34, | (-0.58, | <0.001 | (607.37, | (422.32, | (-1.47, | <0.001 | (7.82, | (5.50, | (-1.59, | <0.001 |
|          | 49.96)  | 28.76)  | -1.96)  |        | 512.90)  | 445.28)  | -0.39)  |        | 638.43)  | 438.35)  | -1.29)  |        | 11.85) | 7.53)  | -1.40)  |        |
|          | 35.43   | 28.57   | -1.11   |        | 337.63   | 308.74   | -0.45   |        | 315.60   | 114.18   | -4.70   |        | 4.35   | 0.90   | -6.32   |        |
| Estonia  | (30.82, | (23.75, | (-1.33, | <0.001 | (323.04, | (292.41, | (-0.55, | <0.001 | (301.48, | (104.32, | (-5.31, | <0.001 | (2.85, | (0.25, | (-7.37, | <0.001 |
|          | 40.57)  | 34.24)  | -0.89)  |        | 352.74)  | 325.87)  | -0.35)  |        | 330.23)  | 124.86)  | -4.08)  |        | 6.41)  | 2.59)  | -5.27)  |        |
|          | 26.72   | 28.36   | 0.19    |        | 450.70   | 440.86   | -0.04   |        | 330.41   | 329.67   | 0.16    |        | 4.67   | 4.69   | 0.15    |        |
| Eswatini | (20.68, | (23.75, | (-0.42, | 0.532  | (425.19, | (422.29, | (-0.15, | 0.526  | (308.30, | (313.53, | (-0.57, | 0.662  | (2.36, | (2.94, | (-0.71, | 0.723  |
|          | 34.08)  | 33.64)  | 0.80)   |        | 477.45)  | 460.06)  | 0.08)   |        | 353.80)  | 346.45)  | 0.90)   |        | 8.43)  | 7.15)  | 1.02)   |        |
|          | 36.10   | 19.80   | -2.52   |        | 468.35   | 413.68   | -0.42   |        | 594.17   | 252.81   | -3.45   |        | 9.23   | 3.39   | -4.02   |        |
| Ethiopia | (35.18, | (19.36, | (-2.76, | <0.001 | (465.07, | (411.69, | (-0.56, | <0.001 | (590.43, | (251.23, | (-3.65, | <0.001 | (8.76, | (3.21, | (-4.24, | <0.001 |
|          | 37.05)  | 20.25)  | -2.27)  |        | 471.65)  | 415.68)  | -0.27)  |        | 597.92)  | 254.39)  | -3.25)  |        | 9.71)  | 3.58)  | -3.80)  |        |
|          | 51.18   | 45.98   | -0.52   |        | 579.33   | 552.79   | -0.18   |        | 818.66   | 618.46   | -1.27   |        | 12.10  | 8.75   | -1.47   |        |
| Fiji     | (43.48, | (39.26, | (-0.58, | <0.001 | (552.58, | (528.84, | (-0.25, | <0.001 | (786.95, | (593.10, | (-1.45, | <0.001 | (8.50, | (5.98, | (-1.67, | <0.001 |
|          | 59.91)  | 53.54)  | -0.46)  |        | 607.08)  | 577.55)  | -0.11)  |        | 851.37)  | 644.64)  | -1.09)  |        | 16.75) | 12.39) | -1.26)  |        |
|          | 22.43   | 19.16   | -0.60   |        | 336.92   | 310.52   | -0.08   |        | 291.30   | 106.69   | -3.51   |        | 4.31   | 1.08   | -4.86   |        |
| Finland  | (20.36, | (17.17, | (-0.75, | <0.001 | (328.70, | (302.29, | (-0.33, | 0.538  | (283.81, | (101.93, | (-3.80, | <0.001 | (3.45, | (0.66, | (-5.13, | <0.001 |
|          | 24.67)  | 21.34)  | -0.44)  |        | 345.32)  | 318.94)  | 0.18)   |        | 298.95)  | 111.63)  | -3.22)  |        | 5.35)  | 1.70)  | -4.60)  |        |
|          | 16.36   | 14.04   | -0.26   |        | 245.27   | 211.37   | -0.39   |        | 183.84   | 90.31    | -2.69   |        | 2.55   | 0.99   | -3.59   |        |
| France   | (15.84, | (13.53, | (-0.38, | <0.001 | (243.23, | (209.38, | (-0.53, | <0.001 | (182.08, | (89.02,  | (-2.80, | <0.001 | (2.35, | (0.86, | (-3.71, | <0.001 |
|          | 16.90)  | 14.56)  | -0.14)  |        | 247.32)  | 213.37)  | -0.25)  |        | 185.61)  | 91.62)   | -2.58)  |        | 2.77)  | 1.13)  | -3.47)  |        |
|          | 31.35   | 23.38   | -1.20   |        | 447.35   | 416.71   | -0.25   |        | 404.25   | 239.34   | -1.95   |        | 5.97   | 3.15   | -2.35   |        |
| Gabon    | (25.66, | (19.94, | (-1.28, | <0.001 | (425.44, | (401.87, | (-0.31, | <0.001 | (383.28, | (228.08, | (-2.07, | <0.001 | (3.65, | (1.98, | (-2.51, | <0.001 |
|          | 37.97)  | 27.26)  | -1.12)  |        | 470.15)  | 431.99)  | -0.18)  |        | 426.12)  | 251.03)  | -1.83)  |        | 9.27)  | 4.80)  | -2.18)  |        |
|          | 36.28   | 35.10   | -0.01   |        | 514.54   | 507.45   | 0.08    |        | 406.22   | 385.32   | -0.19   |        | 5.87   | 5.50   | -0.26   |        |
| Gambia   | (30.00, | (31.16, | (-0.07, | 0.720  | (490.47, | (492.39, | (0.01,  | 0.026  | (384.65, | (372.11, | (-0.42, | 0.097  | (3.51, | (4.01, | (-0.53, | 0.062  |
|          | 43.57)  | 39.42)  | 0.05)   |        | 539.58)  | 522.88)  | 0.14)   |        | 428.78)  | 398.90)  | 0.04)   |        | 9.31)  | 7.39)  | 0.01)   |        |
|          | 46.65   | 34.30   | -0.76   |        | 444.92   | 393.29   | -0.44   |        | 654.69   | 458.29   | -1.39   |        | 9.81   | 6.74   | -1.35   |        |
| Georgia  | (43.81, | (31.14, | (-1.09, | <0.001 | (436.08, | (382.42, | (-0.52, | <0.001 | (643.94, | (446.62, | (-2.38, | 0.009  | (8.53, | (5.41, | (-2.48, | 0.023  |
|          | 49.62)  | 37.72)  | -0.42)  |        | 453.91)  | 404.42)  | -0.37)  |        | 665.59)  | 470.22)  | -0.38)  |        | 11.23) | 8.36)  | -0.20)  |        |
| Germany  | 19.55   | 15.65   | -0.87   | <0.001 | 284.42   | 248.20   | -0.44   | <0.001 | 242.02   | 91.89    | -3.78   | <0.001 | 3.46   | 0.94   | -5.22   | <0.001 |

|               |         |         |         |        |          |          |         |        |          |          |         |        |         |        |         |        |
|---------------|---------|---------|---------|--------|----------|----------|---------|--------|----------|----------|---------|--------|---------|--------|---------|--------|
|               | (19.06, | (15.18, | (-0.97, |        | (282.52, | (246.31, | (-0.57, |        | (240.28, | (90.75,  | (-4.20, |        | (3.25,  | (0.83, | (-5.70, |        |
|               | 20.06)  | 16.14)  | -0.77)  |        | 286.33)  | 250.10)  | -0.30)  |        | 243.77)  | 93.05)   | -3.35)  |        | 3.67)   | 1.06)  | -4.73)  |        |
|               | 39.20   | 37.23   | -0.27   |        | 516.52   | 501.43   | -0.01   |        | 540.99   | 414.42   | -0.84   |        | 8.29    | 6.08   | -0.98   |        |
| Ghana         | (37.50, | (36.18, | (-0.45, | 0.005  | (510.37, | (497.57, | (-0.08, | 0.731  | (534.60, | (410.89, | (-1.09, | <0.001 | (7.51,  | (5.65, | (-1.26, | <0.001 |
|               | 40.97)  | 38.31)  | -0.09)  |        | 522.73)  | 505.31)  | 0.05)   |        | 547.44)  | 417.98)  | -0.59)  |        | 9.13)   | 6.53)  | -0.70)  |        |
|               | 20.07   | 15.33   | -1.03   |        | 289.42   | 271.00   | -0.22   |        | 249.53   | 135.37   | -2.44   |        | 3.52    | 1.66   | -3.00   |        |
| Greece        | (18.67, | (13.98, | (-1.06, | <0.001 | (284.03, | (265.18, | (-0.35, | 0.002  | (244.52, | (131.29, | (-2.60, | <0.001 | (2.95,  | (1.25, | (-3.21, | <0.001 |
|               | 21.55)  | 16.80)  | -1.00)  |        | 294.88)  | 276.94)  | -0.08)  |        | 254.61)  | 139.54)  | -2.28)  |        | 4.17)   | 2.19)  | -2.80)  |        |
|               | 28.34   | 17.98   | -1.86   |        | 506.85   | 425.15   | -0.53   |        | 481.03   | 217.52   | -3.18   |        | 7.31    | 2.79   | -3.75   |        |
| Greenland     | (11.67, | (4.62,  | (-1.98, | <0.001 | (423.85, | (341.03, | (-0.78, | <0.001 | (400.63, | (159.13, | (-3.45, | <0.001 | (0.82,  | (0.01, | (-4.09, | <0.001 |
|               | 61.70)  | 50.30)  | -1.74)  |        | 603.95)  | 525.34)  | -0.28)  |        | 575.49)  | 292.16)  | -2.91)  |        | 32.89)  | 27.22) | -3.41)  |        |
|               | 40.76   | 33.33   | -0.85   |        | 504.21   | 475.52   | -0.14   |        | 509.08   | 255.05   | -2.76   |        | 8.18    | 3.74   | -3.21   |        |
| Grenada       | (21.15, | (17.62, | (-1.04, | <0.001 | (427.76, | (409.53, | (-0.23, | 0.008  | (431.28, | (206.88, | (-3.08, | <0.001 | (1.29,  | (0.23, | (-3.56, | <0.001 |
|               | 71.74)  | 57.78)  | -0.66)  |        | 591.01)  | 549.53)  | -0.04)  |        | 597.40)  | 311.43)  | -2.45)  |        | 27.71)  | 17.34) | -2.86)  |        |
|               | 42.12   | 52.27   | 0.78    |        | 506.81   | 571.45   | 0.55    |        | 403.64   | 520.87   | 0.65    |        | 5.16    | 7.13   | 0.76    |        |
| Guam          | (27.56, | (35.41, | (0.74,  | <0.001 | (452.43, | (511.77, | (0.50,  | <0.001 | (355.35, | (463.97, | (0.42,  | <0.001 | (1.14,  | (2.00, | (0.45,  | <0.001 |
|               | 61.85)  | 74.52)  | 0.82)   |        | 566.10)  | 636.29)  | 0.59)   |        | 456.85)  | 582.93)  | 0.88)   |        | 14.94)  | 18.17) | 1.06)   |        |
|               | 47.87   | 26.32   | -2.53   |        | 486.42   | 395.97   | -0.86   |        | 576.80   | 318.54   | -3.39   |        | 9.02    | 4.79   | -3.62   |        |
| Guatemala     | (45.26, | (25.16, | (-2.71, | <0.001 | (477.99, | (391.46, | (-0.98, | <0.001 | (567.71, | (314.50, | (-3.87, | <0.001 | (7.91,  | (4.31, | (-4.14, | <0.001 |
|               | 50.60)  | 27.52)  | -2.35)  |        | 494.97)  | 400.53)  | -0.73)  |        | 586.01)  | 322.63)  | -2.90)  |        | 10.26)  | 5.32)  | -3.10)  |        |
|               | 33.44   | 36.08   | 0.45    |        | 394.58   | 416.66   | 0.38    |        | 444.58   | 436.01   | 0.31    |        | 6.78    | 6.56   | 0.28    |        |
| Guinea        | (30.93, | (34.28, | (0.36,  | <0.001 | (385.90, | (410.58, | (0.30,  | <0.001 | (435.33, | (429.77, | (0.18,  | <0.001 | (5.67,  | (5.81, | (0.15,  | <0.001 |
|               | 36.11)  | 37.94)  | 0.54)   |        | 403.41)  | 422.80)  | 0.47)   |        | 453.99)  | 442.32)  | 0.43)   |        | 8.04)   | 7.39)  | 0.42)   |        |
|               | 52.56   | 48.40   | -0.28   |        | 548.15   | 524.82   | -0.06   |        | 725.99   | 609.40   | -0.37   |        | 11.36   | 9.39   | -0.41   |        |
| Guinea-Bissau | (44.91, | (43.41, | (-0.33, | <0.001 | (523.15, | (508.36, | (-0.11, | 0.048  | (696.99, | (591.51, | (-0.51, | <0.001 | (7.97,  | (7.27, | (-0.56, | <0.001 |
|               | 61.21)  | 53.83)  | -0.23)  |        | 574.09)  | 541.72)  | 0.00)   |        | 755.93)  | 627.71)  | -0.24)  |        | 15.78)  | 11.96) | -0.26)  |        |
|               | 50.86   | 37.94   | -1.23   |        | 594.41   | 519.52   | -0.41   |        | 806.33   | 532.88   | -1.76   |        | 13.10   | 8.45   | -1.88   |        |
| Guyana        | (43.09, | (31.23, | (-1.32, | <0.001 | (567.45, | (494.09, | (-0.53, | <0.001 | (774.71, | (507.01, | (-2.07, | <0.001 | (9.32,  | (5.46, | (-2.21, | <0.001 |
|               | 59.69)  | 45.71)  | -1.15)  |        | 622.37)  | 545.96)  | -0.29)  |        | 838.96)  | 559.75)  | -1.45)  |        | 17.96)  | 12.53) | -1.54)  |        |
|               | 61.83   | 47.12   | -0.98   |        | 545.09   | 491.81   | -0.26   |        | 1005.86  | 666.63   | -1.08   |        | 16.66   | 10.84  | -1.13   |        |
| Haiti         | (58.59, | (45.26, | (-1.07, | <0.001 | (535.48, | (485.80, | (-0.39, | <0.001 | (992.77, | (659.61, | (-1.28, | <0.001 | (15.01, | (9.96, | (-1.34, | <0.001 |
|               | 65.20)  | 49.04)  | -0.89)  |        | 554.83)  | 497.88)  | -0.14)  |        | 1019.08) | 673.71)  | -0.89)  |        | 18.46)  | 11.78) | -0.93)  |        |
| Honduras      | 29.53   | 23.40   | -0.96   | <0.001 | 389.85   | 391.43   | 0.09    | 0.110  | 692.30   | 327.05   | -2.95   | <0.001 | 11.22   | 5.03   | -3.15   | <0.001 |

|                               |         |         |         |        |          |          |         |        |          |          |         |        |         |        |         |        |
|-------------------------------|---------|---------|---------|--------|----------|----------|---------|--------|----------|----------|---------|--------|---------|--------|---------|--------|
|                               | (26.85, | (21.90, | (-1.15, |        | (380.03, | (385.27, | (-0.02, |        | (679.19, | (321.36, | (-3.36, |        | (9.59,  | (4.34, | (-3.61, |        |
|                               | 32.42)  | 24.97)  | -0.77)  |        | 399.86)  | 397.68)  | 0.20)   |        | 705.61)  | 332.81)  | -2.55)  |        | 13.06)  | 5.80)  | -2.69)  |        |
|                               | 43.68   | 26.75   | -2.06   |        | 463.14   | 368.93   | -0.77   |        | 467.33   | 161.83   | -4.50   |        | 6.79    | 1.57   | -6.19   |        |
| Hungary                       | (41.65, | (24.93, | (-2.20, | <0.001 | (456.38, | (362.11, | (-0.91, | <0.001 | (460.66, | (157.36, | (-4.81, | <0.001 | (6.02,  | (1.17, | (-6.56, | <0.001 |
|                               | 45.80)  | 28.68)  | -1.91)  |        | 469.98)  | 375.86)  | -0.63)  |        | 474.08)  | 166.40)  | -4.20)  |        | 7.64)   | 2.09)  | -5.82)  |        |
|                               | 16.64   | 13.36   | -1.11   |        | 227.84   | 208.94   | -0.39   |        | 165.35   | 72.48    | -3.21   |        | 2.22    | 0.67   | -4.71   |        |
| Iceland                       | (9.77,  | (7.71,  | (-1.35, | <0.001 | (199.88, | (184.27, | (-0.55, | <0.001 | (141.63, | (58.25,  | (-3.46, | <0.001 | (0.33,  | (0.01, | (-5.00, | <0.001 |
|                               | 26.61)  | 21.87)  | -0.87)  |        | 258.72)  | 236.24)  | -0.23)  |        | 192.00)  | 89.41)   | -2.96)  |        | 7.58)   | 4.89)  | -4.43)  |        |
|                               | 25.43   | 24.26   | -0.24   |        | 337.69   | 343.63   | 0.16    |        | 310.20   | 235.61   | -1.11   |        | 4.49    | 3.22   | -1.31   |        |
| India                         | (25.25, | (24.13, | (-0.40, | 0.005  | (337.05, | (343.16, | (0.03,  | 0.021  | (309.59, | (235.21, | (-1.37, | <0.001 | (4.42,  | (3.17, | (-1.63, | <0.001 |
|                               | 25.60)  | 24.39)  | -0.08)  |        | 338.32)  | 344.11)  | 0.29)   |        | 310.81)  | 236.00)  | -0.85)  |        | 4.57)   | 3.26)  | -0.99)  |        |
|                               | 55.24   | 52.36   | -0.21   |        | 602.16   | 576.50   | -0.11   |        | 773.32   | 523.52   | -1.22   |        | 11.46   | 7.19   | -1.44   |        |
| Indonesia                     | (54.70, | (51.93, | (-0.23, | <0.001 | (600.36, | (575.07, | (-0.17, | 0.002  | (771.28, | (522.16, | (-1.35, | <0.001 | (11.21, | (7.03, | (-1.60, | <0.001 |
|                               | 55.79)  | 52.80)  | -0.19)  |        | 603.95)  | 577.94)  | -0.04)  |        | 775.36)  | 524.89)  | -1.10)  |        | 11.71)  | 7.35)  | -1.27)  |        |
|                               | 31.05   | 25.73   | -0.75   |        | 399.52   | 382.93   | -0.12   |        | 334.61   | 222.38   | -1.33   |        | 4.69    | 2.76   | -1.73   |        |
| Iran (Islamic<br>Republic of) | (30.27, | (25.22, | (-0.89, | <0.001 | (396.73, | (380.93, | (-0.28, | 0.114  | (332.06, | (220.84, | (-1.45, | <0.001 | (4.39,  | (2.59, | (-1.86, | <0.001 |
|                               | 31.85)  | 26.25)  | -0.61)  |        | 402.32)  | 384.93)  | 0.03)   |        | 337.17)  | 223.93)  | -1.21)  |        | 5.00)   | 2.94)  | -1.61)  |        |
|                               | 52.26   | 46.92   | -0.52   |        | 612.45   | 575.51   | -0.21   |        | 642.92   | 503.54   | -1.04   |        | 9.53    | 7.17   | -1.22   |        |
| Iraq                          | (50.40, | (45.90, | (-0.58, | <0.001 | (606.08, | (571.94, | (-0.27, | <0.001 | (636.40, | (500.21, | (-1.20, | <0.001 | (8.74,  | (6.77, | (-1.41, | <0.001 |
|                               | 54.17)  | 47.96)  | -0.45)  |        | 618.88)  | 579.10)  | -0.15)  |        | 649.50)  | 506.89)  | -0.88)  |        | 10.37)  | 7.58)  | -1.03)  |        |
|                               | 19.61   | 14.64   | -1.41   |        | 262.05   | 242.47   | -0.42   |        | 186.56   | 78.45    | -3.26   |        | 2.57    | 0.72   | -4.53   |        |
| Ireland                       | (17.31, | (12.86, | (-1.58, | <0.001 | (253.46, | (235.05, | (-0.55, | <0.001 | (179.31, | (74.27,  | (-3.49, | <0.001 | (1.78,  | (0.38, | (-4.89, | <0.001 |
|                               | 22.13)  | 16.61)  | -1.25)  |        | 270.86)  | 250.07)  | -0.30)  |        | 194.03)  | 82.82)   | -3.03)  |        | 3.59)   | 1.27)  | -4.17)  |        |
|                               | 16.52   | 14.49   | -0.71   |        | 233.68   | 231.15   | -0.08   |        | 146.78   | 66.69    | -3.22   |        | 1.87    | 0.53   | -5.12   |        |
| Israel                        | (14.73, | (13.21, | (-1.03, | <0.001 | (226.82, | (225.96, | (-0.25, | 0.327  | (141.36, | (63.92,  | (-3.50, | <0.001 | (1.30,  | (0.31, | (-5.41, | <0.001 |
|                               | 18.46)  | 15.85)  | -0.39)  |        | 240.70)  | 236.43)  | 0.09)   |        | 152.35)  | 69.56)   | -2.94)  |        | 2.60)   | 0.85)  | -4.82)  |        |
|                               | 17.50   | 13.61   | -1.45   |        | 232.23   | 235.83   | 0.02    |        | 195.03   | 92.20    | -2.96   |        | 2.73    | 0.97   | -4.10   |        |
| Italy                         | (16.94, | (13.06, | (-1.67, | <0.001 | (230.19, | (233.51, | (-0.05, | 0.519  | (193.16, | (90.75,  | (-3.13, | <0.001 | (2.52,  | (0.83, | (-4.30, | <0.001 |
|                               | 18.07)  | 14.19)  | -1.22)  |        | 234.29)  | 238.17)  | 0.10)   |        | 196.92)  | 93.66)   | -2.79)  |        | 2.96)   | 1.13)  | -3.91)  |        |
|                               | 28.78   | 32.43   | 0.43    |        | 417.36   | 463.32   | 0.46    |        | 296.19   | 257.14   | -1.14   |        | 4.44    | 3.76   | -1.33   |        |
| Jamaica                       | (25.30, | (29.24, | (0.31,  | <0.001 | (403.95, | (451.08, | (0.38,  | <0.001 | (284.87, | (248.01, | (-1.71, | <0.001 | (3.14,  | (2.73, | (-1.98, | <0.001 |
|                               | 32.63)  | 35.88)  | 0.56)   |        | 431.13)  | 475.82)  | 0.53)   |        | 307.88)  | 266.52)  | -0.57)  |        | 6.13)   | 5.06)  | -0.67)  |        |
| Japan                         | 21.51   | 24.56   | 0.46    | <0.001 | 242.15   | 292.97   | 0.70    | <0.001 | 196.77   | 127.21   | -1.58   | <0.001 | 2.67    | 1.32   | -2.40   | <0.001 |

|              |          |         |         |        |          |          |         |        |           |           |         |        |         |         |         |        |
|--------------|----------|---------|---------|--------|----------|----------|---------|--------|-----------|-----------|---------|--------|---------|---------|---------|--------|
|              | (21.09,  | (24.05, | (0.28,  |        | (240.72, | (291.18, | (0.47,  |        | (195.49,  | (126.04,  | (-1.70, |        | (2.52,  | (1.20,  | (-2.63, |        |
|              | 21.94)   | 25.08)  | 0.63)   |        | 243.59)  | 294.77)  | 0.92)   |        | 198.06)   | 128.39)   | -1.47)  |        | 2.82)   | 1.44)   | -2.17)  |        |
|              | 43.83    | 34.93   | -0.95   |        | 592.87   | 536.38   | -0.33   |        | 278.93    | 148.92    | -2.71   |        | 3.37    | 1.23    | -4.37   |        |
| Jordan       | (40.14,  | (33.29, | (-1.10, | <0.001 | (579.27, | (529.88, | (-0.40, | <0.001 | (269.49,  | (145.50,  | (-3.03, | <0.001 | (2.38,  | (0.94,  | (-4.91, | <0.001 |
|              | 47.80)   | 36.64)  | -0.80)  |        | 606.73)  | 542.94)  | -0.25)  |        | 288.63)   | 152.40)   | -2.39)  |        | 4.65)   | 1.59)   | -3.84)  |        |
|              | 45.62    | 32.81   | -1.15   |        | 451.39   | 389.35   | -0.54   |        | 430.76    | 358.88    | -1.34   |        | 6.00    | 5.04    | -1.41   |        |
| Kazakhstan   | (44.03,  | (31.51, | (-1.63, | <0.001 | (446.34, | (384.82, | (-0.72, | <0.001 | (425.82,  | (354.56,  | (-2.21, | 0.004  | (5.43,  | (4.55,  | (-2.42, | 0.009  |
|              | 47.26)   | 34.16)  | -0.68)  |        | 456.48)  | 393.92)  | -0.36)  |        | 435.74)   | 363.25)   | -0.45)  |        | 6.62)   | 5.59)   | -0.38)  |        |
|              | 29.24    | 25.61   | -0.65   |        | 536.99   | 530.97   | -0.03   |        | 336.21    | 315.27    | -0.27   |        | 4.59    | 4.22    | -0.36   |        |
| Kenya        | (28.00,  | (24.91, | (-0.81, | <0.001 | (531.75, | (527.79, | (-0.09, | 0.406  | (331.99,  | (312.80,  | (-0.57, | 0.071  | (4.10,  | (3.94,  | (-0.74, | 0.064  |
|              | 30.53)   | 26.33)  | -0.50)  |        | 542.26)  | 534.16)  | 0.04)   |        | 340.48)   | 317.75)   | 0.03)   |        | 5.13)   | 4.53)   | 0.02)   |        |
|              | 167.41   | 126.55  | -1.19   |        | 974.20   | 840.57   | -0.57   |        | 2674.26   | 2350.97   | -0.70   |        | 43.37   | 38.04   | -0.73   |        |
| Kiribati     | (122.63, | (96.47, | (-1.27, | <0.001 | (860.54, | (759.50, | (-0.61, | <0.001 | (2485.66, | (2214.68, | (-0.81, | <0.001 | (22.36, | (22.49, | (-0.84, | <0.001 |
|              | 223.91)  | 163.25) | -1.12)  |        | 1099.27) | 928.10)  | -0.53)  |        | ,         | ,         | -0.59)  |        | 76.76)  | 60.46)  | -0.61)  |        |
|              | 30.15    | 31.80   | 0.04    |        | 420.68   | 440.98   | 0.17    |        | 212.91    | 169.40    | -1.10   |        | 2.51    | 1.76    | -1.63   |        |
| Kuwait       | (26.64,  | (29.45, | (-0.18, | 0.733  | (407.31, | (432.06, | (0.10,  | <0.001 | (203.32,  | (163.81,  | (-1.59, | <0.001 | (1.58,  | (1.25,  | (-2.38, | <0.001 |
|              | 34.05)   | 34.35)  | 0.26)   |        | 434.44)  | 450.09)  | 0.24)   |        | 222.88)   | 175.17)   | -0.60)  |        | 3.88)   | 2.49)   | -0.88)  |        |
|              | 45.03    | 28.56   | -1.90   |        | 400.75   | 315.56   | -1.05   |        | 527.37    | 311.78    | -2.93   |        | 7.92    | 4.44    | -3.21   |        |
| Kyrgyzstan   | (41.87,  | (26.54, | (-2.10, | <0.001 | (391.23, | (308.78, | (-1.16, | <0.001 | (516.41,  | (304.99,  | (-3.48, | <0.001 | (6.62,  | (3.66,  | (-3.85, | <0.001 |
|              | 48.37)   | 30.69)  | -1.70)  |        | 410.46)  | 322.45)  | -0.94)  |        | 538.51)   | 318.68)   | -2.38)  |        | 9.41)   | 5.34)   | -2.57)  |        |
| Lao People's | 68.56    | 44.53   | -1.79   |        | 552.06   | 437.89   | -0.88   |        | 667.80    | 566.20    | -0.55   |        | 9.87    | 8.38    | -0.55   |        |
| Democratic   | (64.22,  | (42.17, | (-1.91, | <0.001 | (539.68, | (430.47, | (-0.96, | <0.001 | (654.08,  | (557.73,  | (-0.81, | <0.001 | (8.25,  | (7.37,  | (-0.86, | 0.001  |
| Republic     | 73.13)   | 46.98)  | -1.67)  |        | 564.67)  | 445.40)  | -0.80)  |        | 681.75)   | 574.77)   | -0.29)  |        | 11.73)  | 9.49)   | -0.24)  |        |
|              | 31.04    | 27.90   | -0.44   |        | 333.67   | 338.41   | 0.12    |        | 263.56    | 158.65    | -2.63   |        | 3.44    | 1.61    | -3.52   |        |
| Latvia       | (27.67,  | (23.84, | (-0.52, | <0.001 | (322.38, | (323.87, | (0.03,  | 0.011  | (253.50,  | (148.80,  | (-3.24, | <0.001 | (2.39,  | (0.78,  | (-4.42, | <0.001 |
|              | 34.73)   | 32.55)  | -0.36)  |        | 345.27)  | 353.53)  | 0.21)   |        | 273.93)   | 169.08)   | -2.02)  |        | 4.84)   | 3.10)   | -2.60)  |        |
|              | 32.13    | 30.65   | -0.02   |        | 440.96   | 448.19   | 0.24    |        | 222.92    | 152.36    | -1.16   |        | 2.70    | 1.45    | -2.11   |        |
| Lebanon      | (28.86,  | (28.34, | (-0.24, | 0.831  | (428.64, | (439.21, | (0.13,  | <0.001 | (214.18,  | (147.13,  | (-1.48, | <0.001 | (1.81,  | (0.98,  | (-2.54, | <0.001 |
|              | 35.69)   | 33.12)  | 0.20)   |        | 453.56)  | 457.33)  | 0.36)   |        | 231.93)   | 157.75)   | -0.84)  |        | 3.89)   | 2.08)   | -1.68)  |        |
|              | 24.42    | 38.48   | 1.93    |        | 395.77   | 445.61   | 0.57    |        | 271.29    | 404.83    | 2.35    |        | 3.76    | 6.04    | 2.70    |        |
| Lesotho      | (20.61,  | (34.54, | (1.59,  | <0.001 | (380.21, | (432.08, | (0.50,  | <0.001 | (258.29,  | (391.87,  | (1.84,  | <0.001 | (2.36,  | (4.54,  | (2.09,  | <0.001 |
|              | 28.76)   | 42.75)  | 2.26)   |        | 411.85)  | 459.47)  | 0.65)   |        | 284.82)   | 418.12)   | 2.86)   |        | 5.74)   | 7.88)   | 3.32)   |        |

|                  |         |         |         |        |          |          |         |        |          |          |         |        |         |         |         |        |
|------------------|---------|---------|---------|--------|----------|----------|---------|--------|----------|----------|---------|--------|---------|---------|---------|--------|
|                  | 36.34   | 30.86   | -0.54   |        | 472.84   | 447.17   | -0.03   |        | 466.62   | 356.82   | -0.90   |        | 7.00    | 5.14    | -1.06   |        |
| Liberia          | (31.78, | (28.36, | (-0.65, | <0.001 | (456.03, | (437.59, | (-0.14, | 0.608  | (449.86, | (348.22, | (-1.09, | <0.001 | (5.08,  | (4.15,  | (-1.26, | <0.001 |
|                  | 41.39)  | 33.53)  | -0.44)  |        | 490.12)  | 456.91)  | 0.09)   |        | 483.86)  | 365.59)  | -0.72)  |        | 9.42)   | 6.31)   | -0.86)  |        |
|                  | 34.66   | 38.54   | 0.50    |        | 432.60   | 492.91   | 0.58    |        | 461.31   | 385.52   | -0.55   |        | 6.72    | 5.32    | -0.78   |        |
| Libya            | (31.66, | (36.40, | (0.41,  | <0.001 | (421.83, | (485.16, | (0.51,  | <0.001 | (450.31, | (378.65, | (-0.86, | 0.001  | (5.44,  | (4.54,  | (-1.13, | <0.001 |
|                  | 37.89)  | 40.78)  | 0.59)   |        | 443.60)  | 500.75)  | 0.65)   |        | 472.53)  | 392.49)  | -0.24)  |        | 8.23)   | 6.19)   | -0.43)  |        |
|                  | 34.44   | 30.87   | -0.26   |        | 367.06   | 349.62   | -0.09   |        | 251.14   | 185.38   | -0.98   |        | 3.15    | 2.07    | -1.24   |        |
| Lithuania        | (31.44, | (27.30, | (-0.38, | <0.001 | (357.12, | (337.36, | (-0.16, | 0.010  | (242.91, | (176.53, | (-1.43, | <0.001 | (2.29,  | (1.24,  | (-1.89, | 0.001  |
|                  | 37.65)  | 34.82)  | -0.15)  |        | 377.22)  | 362.27)  | -0.02)  |        | 259.58)  | 194.61)  | -0.53)  |        | 4.23)   | 3.31)   | -0.58)  |        |
|                  | 18.72   | 13.52   | -1.44   |        | 255.45   | 239.09   | -0.20   |        | 244.86   | 90.52    | -4.04   |        | 3.55    | 0.93    | -5.49   |        |
| Luxembourg       | (12.52, | (9.14,  | (-1.63, | <0.001 | (230.86, | (219.25, | (-0.33, | 0.005  | (220.57, | (78.48,  | (-4.35, | <0.001 | (1.22,  | (0.13,  | (-5.85, | <0.001 |
|                  | 27.41)  | 19.59)  | -1.25)  |        | 282.32)  | 260.47)  | -0.07)  |        | 271.47)  | 104.12)  | -3.73)  |        | 8.71)   | 3.80)   | -5.13)  |        |
|                  | 72.93   | 52.17   | -1.36   |        | 669.35   | 588.96   | -0.47   |        | 1363.79  | 844.20   | -1.46   |        | 21.95   | 13.25   | -1.53   |        |
| Madagascar       | (70.25, | (50.73, | (-1.44, | <0.001 | (661.31, | (584.19, | (-0.53, | <0.001 | (1352.33 | (838.45, | (-1.72, | <0.001 | (20.50, | (12.53, | (-1.81, | <0.001 |
|                  | 75.69)  | 53.65)  | -1.29)  |        | 677.46)  | 593.76)  | -0.41)  |        | 1375.33) | 849.97)  | -1.20)  |        | 23.48)  | 14.00)  | -1.26)  |        |
|                  | 28.16   | 23.48   | -0.91   |        | 481.92   | 478.80   | -0.04   |        | 444.42   | 341.35   | -1.22   |        | 6.55    | 4.75    | -1.46   |        |
| Malawi           | (26.32, | (22.33, | (-1.05, | <0.001 | (474.38, | (473.63, | (-0.14, | 0.447  | (437.08, | (336.95, | (-1.43, | <0.001 | (5.68,  | (4.23,  | (-1.70, | <0.001 |
|                  | 30.11)  | 24.68)  | -0.77)  |        | 489.55)  | 484.01)  | 0.06)   |        | 451.87)  | 345.80)  | -1.01)  |        | 7.53)   | 5.31)   | -1.22)  |        |
|                  | 45.44   | 35.26   | -0.94   |        | 556.29   | 478.95   | -0.52   |        | 582.82   | 356.87   | -1.61   |        | 8.15    | 4.56    | -1.92   |        |
| Malaysia         | (43.89, | (34.27, | (-1.17, | <0.001 | (550.81, | (475.32, | (-0.66, | <0.001 | (577.22, | (353.73, | (-1.99, | <0.001 | (7.49,  | (4.21,  | (-2.38, | <0.001 |
|                  | 47.04)  | 36.26)  | -0.71)  |        | 561.81)  | 482.61)  | -0.38)  |        | 588.47)  | 360.03)  | -1.23)  |        | 8.84)   | 4.93)   | -1.45)  |        |
|                  | 45.06   | 26.39   | -2.15   |        | 474.11   | 366.67   | -0.87   |        | 718.61   | 229.12   | -4.03   |        | 10.94   | 2.70    | -5.07   |        |
| Maldives         | (30.12, | (20.48, | (-2.51, | <0.001 | (422.63, | (343.81, | (-1.05, | <0.001 | (654.23, | (211.03, | (-4.39, | <0.001 | (4.30,  | (1.11,  | (-5.47, | <0.001 |
|                  | 65.51)  | 33.94)  | -1.78)  |        | 530.71)  | 391.02)  | -0.69)  |        | 788.12)  | 248.73)  | -3.67)  |        | 23.63)  | 6.24)   | -4.67)  |        |
|                  | 44.98   | 34.22   | -1.09   |        | 477.35   | 419.87   | -0.42   |        | 626.23   | 423.34   | -1.48   |        | 9.79    | 6.35    | -1.65   |        |
| Mali             | (42.46, | (32.83, | (-1.20, | <0.001 | (469.12, | (415.05, | (-0.51, | <0.001 | (616.73, | (418.45, | (-1.69, | <0.001 | (8.63,  | (5.76,  | (-1.87, | <0.001 |
|                  | 47.62)  | 35.66)  | -0.98)  |        | 485.70)  | 424.74)  | -0.33)  |        | 635.84)  | 428.27)  | -1.27)  |        | 11.08)  | 6.99)   | -1.42)  |        |
|                  | 19.65   | 15.77   | -1.03   |        | 258.56   | 240.42   | -0.25   |        | 181.06   | 103.72   | -2.16   |        | 2.41    | 1.14    | -2.89   |        |
| Malta            | (13.07, | (9.97,  | (-1.15, | <0.001 | (232.93, | (215.91, | (-0.35, | <0.001 | (159.55, | (87.73,  | (-2.30, | <0.001 | (0.58,  | (0.10,  | (-3.07, | <0.001 |
|                  | 28.60)  | 24.28)  | -0.90)  |        | 286.43)  | 267.38)  | -0.15)  |        | 204.83)  | 122.22)  | -2.02)  |        | 6.96)   | 5.63)   | -2.70)  |        |
|                  | 86.55   | 85.07   | -0.25   |        | 659.58   | 655.22   | -0.12   |        | 1205.84  | 1340.43  | 0.22    |        | 18.56   | 21.26   | 0.25    |        |
| Marshall Islands | (46.24, | (52.07, | (-0.49, | 0.038  | (536.67, | (556.21, | (-0.24, | 0.046  | (1038.59 | (1196.89 | (-0.00, | 0.053  | (3.58,  | (6.93,  | (0.00,  | 0.049  |

|                   |         |         |         |        |          |          |         |        |          |          |         |        |         |         |         |        |
|-------------------|---------|---------|---------|--------|----------|----------|---------|--------|----------|----------|---------|--------|---------|---------|---------|--------|
|                   | 148.96) | 131.39) | -0.02)  |        | 803.18)  | 766.96)  | -0.00)  |        | ,        | ,        | 0.44)   |        | 57.77)  | 49.78)  | 0.49)   |        |
|                   |         |         |         |        |          |          |         |        | 1393.40) | 1496.60) |         |        |         |         |         |        |
|                   | 43.55   | 28.66   | -1.64   |        | 546.15   | 473.12   | -0.49   |        | 510.95   | 255.91   | -2.14   |        | 7.60    | 3.33    | -2.53   |        |
| Mauritania        | (38.73, | (25.94, | (-1.81, | <0.001 | (528.91, | (462.00, | (-0.59, | <0.001 | (494.18, | (247.66, | (-2.27, | <0.001 | (5.66,  | (2.44,  | (-2.67, | <0.001 |
|                   | 48.84)  | 31.59)  | -1.46)  |        | 563.84)  | 484.46)  | -0.40)  |        | 528.16)  | 264.37)  | -2.01)  |        | 10.01)  | 4.46)   | -2.39)  |        |
|                   | 43.53   | 33.43   | -1.23   |        | 515.39   | 441.27   | -0.74   |        | 530.71   | 337.05   | -1.91   |        | 7.62    | 4.41    | -2.23   |        |
| Mauritius         | (37.91, | (28.46, | (-1.34, | <0.001 | (495.60, | (422.67, | (-0.85, | <0.001 | (510.54, | (320.91, | (-2.10, | <0.001 | (5.37,  | (2.75,  | (-2.45, | <0.001 |
|                   | 49.77)  | 39.05)  | -1.11)  |        | 535.79)  | 460.50)  | -0.64)  |        | 551.49)  | 353.81)  | -1.71)  |        | 10.50)  | 6.75)   | -2.00)  |        |
|                   | 33.13   | 26.41   | -0.94   |        | 506.39   | 470.75   | -0.22   |        | 259.89   | 180.37   | -1.10   |        | 3.67    | 2.36    | -1.36   |        |
| Mexico            | (32.49, | (25.96, | (-1.22, | <0.001 | (503.92, | (468.86, | (-0.36, | 0.005  | (258.12, | (179.20, | (-1.38, | <0.001 | (3.46,  | (2.22,  | (-1.69, | <0.001 |
|                   | 33.77)  | 26.87)  | -0.66)  |        | 508.87)  | 472.66)  | -0.07)  |        | 261.68)  | 181.55)  | -0.81)  |        | 3.89)   | 2.50)   | -1.02)  |        |
|                   |         |         |         |        |          |          |         |        | 1550.55  | 1334.00  |         |        |         |         |         |        |
| Micronesia        | 102.90  | 74.91   | -1.26   |        | 715.13   | 604.89   | -0.63   |        | (1423.44 | (1221.26 | -0.65   |        | 24.80   | 21.07   | -0.70   |        |
| (Federated States | (72.24, | (50.07, | (-1.35, | <0.001 | (629.82, | (529.49, | (-0.69, | <0.001 | (-0.70,  | <0.001   | (-0.70, | <0.001 | (11.14, | (9.13,  | (-0.76, | <0.001 |
| of)               | 142.62) | 108.13) | -1.18)  |        | 809.15)  | 688.31)  | -0.57)  |        | ,        | ,        | -0.60)  |        | 48.13)  | 41.90)  | -0.64)  |        |
|                   |         |         |         |        |          |          |         |        | 1686.32) | 1454.66) |         |        |         |         |         |        |
|                   | 16.05   | 14.88   | -0.30   |        | 243.03   | 239.95   | -0.01   |        | 187.97   | 111.20   | -1.75   |        | 2.61    | 1.29    | -2.36   |        |
| Monaco            | (1.20,  | (0.97,  | (-0.36, | <0.001 | (154.37, | (152.33, | (-0.13, | 0.822  | (111.58, | (55.00,  | (-1.99, | <0.001 | (0.00,  | (0.00,  | (-2.64, | <0.001 |
|                   | 85.16)  | 69.82)  | -0.25)  |        | 373.74)  | 362.04)  | 0.11)   |        | 307.01)  | 203.09)  | -1.51)  |        | 65.26)  | 46.69)  | -2.08)  |        |
|                   | 51.34   | 41.48   | -1.02   |        | 417.61   | 394.48   | -0.27   |        | 668.26   | 671.43   | -0.62   |        | 10.33   | 10.60   | -0.62   |        |
| Mongolia          | (46.25, | (38.22, | (-1.22, | <0.001 | (402.97, | (384.26, | (-0.36, | <0.001 | (649.55, | (658.18, | (-0.98, | 0.001  | (8.10,  | (9.00,  | (-1.03, | 0.005  |
|                   | 56.87)  | 44.97)  | -0.82)  |        | 432.69)  | 404.93)  | -0.17)  |        | 687.40)  | 684.91)  | -0.27)  |        | 13.04)  | 12.44)  | -0.21)  |        |
|                   | 40.27   | 29.69   | -1.39   |        | 410.15   | 370.68   | -0.47   |        | 468.69   | 266.18   | -2.37   |        | 6.86    | 3.40    | -2.83   |        |
| Montenegro        | (32.84, | (22.94, | (-1.56, | <0.001 | (385.59, | (345.71, | (-0.56, | <0.001 | (442.43, | (245.19, | (-2.88, | <0.001 | (4.03,  | (1.44,  | (-3.47, | <0.001 |
|                   | 48.91)  | 37.92)  | -1.22)  |        | 435.89)  | 397.08)  | -0.39)  |        | 496.11)  | 288.58)  | -1.85)  |        | 10.95)  | 6.96)   | -2.18)  |        |
|                   | 43.35   | 41.79   | -0.17   |        | 501.18   | 493.26   | -0.03   |        | 476.39   | 300.27   | -1.67   |        | 6.99    | 3.91    | -2.03   |        |
| Morocco           | (42.02, | (40.75, | (-0.24, | <0.001 | (496.69, | (489.68, | (-0.10, | 0.402  | (471.99, | (297.48, | (-1.90, | <0.001 | (6.46,  | (3.60,  | (-2.32, | <0.001 |
|                   | 44.71)  | 42.84)  | -0.11)  |        | 505.72)  | 496.86)  | 0.04)   |        | 480.83)  | 303.08)  | -1.44)  |        | 7.55)   | 4.24)   | -1.74)  |        |
|                   | 33.73   | 35.25   | 0.35    |        | 539.60   | 568.20   | 0.36    |        | 357.93   | 436.97   | 1.22    |        | 5.01    | 6.32    | 1.41    |        |
| Mozambique        | (31.97, | (34.05, | (0.24,  | <0.001 | (532.62, | (563.52, | (0.24,  | <0.001 | (352.18, | (432.78, | (1.00,  | <0.001 | (4.35,  | (5.82,  | (1.15,  | <0.001 |
|                   | 35.56)  | 36.48)  | 0.46)   |        | 546.65)  | 572.92)  | 0.47)   |        | 363.75)  | 441.20)  | 1.44)   |        | 5.75)   | 6.86)   | 1.67)   |        |
|                   | 39.45   | 30.66   | -1.01   |        | 389.34   | 362.53   | -0.16   |        | 1546.91  | 806.97   | -2.44   |        | 25.39   | 12.60   | -2.61   |        |
| Myanmar           | (38.46, | (29.93, | (-1.08, | <0.001 | (386.26, | (360.02, | (-0.29, | 0.011  | (1540.75 | (803.22, | (-2.64, | <0.001 | (24.60, | (12.13, | (-2.83, | <0.001 |
|                   | 40.45)  | 31.40)  | -0.94)  |        | 392.45)  | 365.06)  | -0.04)  |        | ,        | 810.74)  | -2.25)  |        | 26.20)  | 13.08)  | -2.38)  |        |

|                  |         |         |         |        |          |          |         |        |           |           |         |        |         |         |         |        |
|------------------|---------|---------|---------|--------|----------|----------|---------|--------|-----------|-----------|---------|--------|---------|---------|---------|--------|
|                  |         |         |         |        |          |          |         |        | 1553.09)  |           |         |        |         |         |         |        |
|                  | 29.95   | 21.55   | -1.60   |        | 468.47   | 437.71   | -0.28   |        | 307.71    | 222.38    | -1.66   |        | 4.26    | 2.83    | -2.09   |        |
| Namibia          | (25.20, | (18.72, | (-1.83, | <0.001 | (449.45, | (424.71, | (-0.35, | <0.001 | (292.11,  | (213.08,  | (-2.24, | <0.001 | (2.58,  | (1.86,  | (-2.83, | <0.001 |
|                  | 35.40)  | 24.70)  | -1.37)  |        | 488.14)  | 451.02)  | -0.20)  |        | 323.99)   | 232.01)   | -1.08)  |        | 6.68)   | 4.13)   | -1.35)  |        |
|                  | 90.36   | 83.67   | -0.31   |        | 724.41   | 683.63   | -0.24   |        | 1846.47   | 1837.52   | -0.04   |        | 29.76   | 29.62   | -0.05   |        |
| Nauru            | (21.59, | (20.70, | (-0.76, | 0.187  | (480.38, | (459.03, | (-0.41, | 0.006  | (1441.53, | (1455.20, | (-0.51, | 0.846  | (1.09,  | (1.45,  | (-0.54, | 0.843  |
|                  | 251.10) | 228.91) | 0.16)   |        | 1051.53) | 982.48)  | -0.08)  |        | ,         | ,         | 0.42)   |        | 157.44) | 145.99) | 0.44)   |        |
|                  | 21.83   | 18.48   | -0.63   |        | 267.16   | 248.64   | -0.14   |        | 291.70    | 169.10    | -1.91   |        | 4.39    | 2.22    | -2.40   |        |
| Nepal            | (20.72, | (17.72, | (-0.81, | <0.001 | (263.26, | (245.84, | (-0.25, | 0.019  | (287.57,  | (166.78,  | (-2.15, | <0.001 | (3.90,  | (1.96,  | (-2.68, | <0.001 |
|                  | 22.99)  | 19.26)  | -0.44)  |        | 271.10)  | 251.46)  | -0.02)  |        | 295.88)   | 171.44)   | -1.66)  |        | 4.94)   | 2.51)   | -2.13)  |        |
|                  | 18.93   | 15.43   | -0.97   |        | 253.11   | 255.48   | -0.00   |        | 170.08    | 84.56     | -2.94   |        | 2.29    | 0.81    | -4.23   |        |
| Netherlands      | (17.86, | (14.39, | (-1.08, | <0.001 | (249.15, | (251.23, | (-0.08, | 0.977  | (166.85,  | (82.12,   | (-3.22, | <0.001 | (1.93,  | (0.59,  | (-4.67, | <0.001 |
|                  | 20.05)  | 16.52)  | -0.86)  |        | 257.11)  | 259.79)  | 0.08)   |        | 173.36)   | 87.05)    | -2.65)  |        | 2.70)   | 1.09)   | -3.79)  |        |
|                  | 18.21   | 16.88   | -0.31   |        | 227.21   | 274.97   | 0.74    |        | 165.77    | 95.43     | -2.23   |        | 2.22    | 0.89    | -3.55   |        |
| New Zealand      | (16.04, | (14.81, | (-0.56, | 0.018  | (219.35, | (266.44, | (0.50,  | <0.001 | (159.07,  | (90.44,   | (-2.41, | <0.001 | (1.50,  | (0.47,  | (-3.71, | <0.001 |
|                  | 20.60)  | 19.16)  | -0.06)  |        | 235.29)  | 283.71)  | 0.98)   |        | 172.69)   | 100.63)   | -2.05)  |        | 3.15)   | 1.54)   | -3.39)  |        |
|                  | 32.00   | 25.75   | -0.82   |        | 456.88   | 426.55   | -0.17   |        | 244.85    | 122.49    | -2.31   |        | 3.56    | 1.42    | -3.11   |        |
| Nicaragua        | (28.94, | (23.88, | (-0.97, | <0.001 | (445.25, | (418.86, | (-0.26, | 0.002  | (236.19,  | (118.38,  | (-2.71, | <0.001 | (2.57,  | (1.01,  | (-3.59, | <0.001 |
|                  | 35.30)  | 27.72)  | -0.67)  |        | 468.76)  | 434.35)  | -0.07)  |        | 253.76)   | 126.71)   | -1.91)  |        | 4.82)   | 1.95)   | -2.63)  |        |
|                  | 37.93   | 30.69   | -0.83   |        | 446.58   | 408.79   | -0.24   |        | 488.86    | 375.54    | -1.00   |        | 7.45    | 5.57    | -1.11   |        |
| Niger            | (35.49, | (29.35, | (-0.96, | <0.001 | (438.22, | (403.98, | (-0.35, | <0.001 | (480.03,  | (370.86,  | (-1.19, | <0.001 | (6.38,  | (5.00,  | (-1.33, | <0.001 |
|                  | 40.50)  | 32.07)  | -0.70)  |        | 455.08)  | 413.65)  | -0.13)  |        | 497.82)   | 380.27)   | -0.80)  |        | 8.66)   | 6.18)   | -0.90)  |        |
|                  | 26.63   | 23.57   | -0.57   |        | 413.08   | 436.27   | 0.24    |        | 303.43    | 231.03    | -1.26   |        | 4.33    | 3.00    | -1.65   |        |
| Nigeria          | (26.05, | (23.22, | (-0.72, | <0.001 | (410.81, | (434.78, | (0.13,  | <0.001 | (301.45,  | (229.92,  | (-1.45, | <0.001 | (4.10,  | (2.88,  | (-1.89, | <0.001 |
|                  | 27.22)  | 23.93)  | -0.43)  |        | 415.36)  | 437.77)  | 0.36)   |        | 305.42)   | 232.14)   | -1.06)  |        | 4.58)   | 3.14)   | -1.41)  |        |
|                  | 57.32   | 50.40   | -0.52   |        | 574.66   | 554.47   | -0.14   |        | 973.30    | 699.52    | -1.48   |        | 14.97   | 10.13   | -1.67   |        |
| Niue             | (0.02,  | (0.00,  | (-0.57, | <0.001 | (166.62, | (116.00, | (-0.18, | <0.001 | (400.56,  | (184.49,  | (-1.66, | <0.001 | (0.00,  | (0.00,  | (-1.90, | <0.001 |
|                  | 627.95) | 828.54) | -0.47)  |        | 1439.39) | 1645.86) | -0.09)  |        | 1989.36)  | 1856.32)  | -1.31)  |        | 547.76) | 751.92) | -1.44)  |        |
|                  | 39.11   | 29.98   | -1.10   |        | 433.96   | 399.41   | -0.34   |        | 504.97    | 324.40    | -1.90   |        | 7.25    | 4.26    | -2.26   |        |
| North Macedonia  | (34.95, | (26.36, | (-1.16, | <0.001 | (419.83, | (385.89, | (-0.44, | <0.001 | (489.69,  | (312.13,  | (-2.08, | <0.001 | (5.53,  | (2.97,  | (-2.48, | <0.001 |
|                  | 43.64)  | 34.03)  | -1.05)  |        | 448.46)  | 413.34)  | -0.24)  |        | 520.60)   | 337.08)   | -1.71)  |        | 9.35)   | 6.00)   | -2.04)  |        |
| Northern Mariana | 56.46   | 45.88   | -0.93   | <0.001 | 568.94   | 536.58   | -0.28   | <0.001 | 850.29    | 527.75    | -2.10   | <0.001 | 12.95   | 7.38    | -2.43   | <0.001 |

|                  |         |         |         |        |          |          |         |        |          |          |         |        |        |         |         |        |
|------------------|---------|---------|---------|--------|----------|----------|---------|--------|----------|----------|---------|--------|--------|---------|---------|--------|
| Islands          | (30.62, | (14.85, | (-1.00, |        | (477.90, | (407.53, | (-0.35, |        | (738.39, | (399.74, | (-2.35, |        | (2.83, | (0.07,  | (-2.73, |        |
|                  | 97.41)  | 112.56) | -0.85)  |        | 673.81)  | 696.88)  | -0.20)  |        | 975.85)  | 687.04)  | -1.86)  |        | 39.91) | 56.13)  | -2.14)  |        |
|                  | 23.21   | 22.68   | -0.66   |        | 334.17   | 321.46   | -0.30   |        | 169.07   | 73.50    | -3.06   |        | 2.13   | 0.48    | -5.21   |        |
| Norway           | (20.94, | (20.54, | (-0.88, | <0.001 | (325.36, | (313.26, | (-0.45, | 0.001  | (162.83, | (69.62,  | (-3.23, | <0.001 | (1.48, | (0.22,  | (-5.42, | <0.001 |
|                  | 25.68)  | 25.01)  | -0.43)  |        | 343.17)  | 329.82)  | -0.14)  |        | 175.49)  | 77.56)   | -2.90)  |        | 2.97)  | 0.94)   | -5.00)  |        |
|                  | 33.85   | 27.84   | -0.79   |        | 441.38   | 444.54   | 0.11    |        | 436.59   | 246.31   | -1.67   |        | 6.25   | 2.97    | -2.19   |        |
| Oman             | (29.95, | (25.77, | (-0.86, | <0.001 | (427.02, | (436.26, | (0.01,  | 0.029  | (422.21, | (239.71, | (-1.97, | <0.001 | (4.64, | (2.29,  | (-2.59, | <0.001 |
|                  | 38.13)  | 30.08)  | -0.72)  |        | 456.13)  | 452.99)  | 0.21)   |        | 451.35)  | 253.08)  | -1.37)  |        | 8.26)  | 3.84)   | -1.79)  |        |
|                  | 38.85   | 36.93   | -0.38   |        | 436.60   | 447.21   | 0.09    |        | 402.42   | 468.91   | 0.10    |        | 5.92   | 6.97    | 0.05    |        |
| Pakistan         | (38.19, | (36.51, | (-0.50, | <0.001 | (434.43, | (445.77, | (0.02,  | 0.009  | (400.31, | (467.43, | (-0.14, | 0.409  | (5.66, | (6.79,  | (-0.23, | 0.696  |
|                  | 39.51)  | 37.35)  | -0.25)  |        | 438.78)  | 448.65)  | 0.15)   |        | 404.54)  | 470.39)  | 0.35)   |        | 6.18)  | 7.16)   | 0.34)   |        |
|                  | 60.90   | 60.66   | -0.05   |        | 598.12   | 590.65   | -0.02   |        | 1063.67  | 1004.88  | -0.03   |        | 16.44  | 15.46   | -0.02   |        |
| Palau            | (16.99, | (16.25, | (-0.10, | 0.034  | (428.04, | (418.14, | (-0.08, | 0.368  | (832.13, | (774.49, | (-0.12, | 0.561  | (0.56, | (0.40,  | (-0.14, | 0.754  |
|                  | 156.45) | 163.55) | -0.00)  |        | 814.84)  | 814.77)  | 0.03)   |        | 1341.18) | 1286.23) | 0.07)   |        | 88.60) | 95.29)  | 0.10)   |        |
|                  | 33.04   | 28.31   | -0.60   |        | 438.84   | 429.61   | 0.06    |        | 281.26   | 174.37   | -1.86   |        | 3.70   | 1.88    | -2.70   |        |
| Palestine        | (28.67, | (25.96, | (-0.76, | <0.001 | (422.56, | (420.32, | (-0.04, | 0.241  | (268.29, | (168.48, | (-2.11, | <0.001 | (2.33, | (1.31,  | (-3.05, | <0.001 |
|                  | 37.94)  | 30.83)  | -0.44)  |        | 455.63)  | 439.06)  | 0.15)   |        | 294.75)  | 180.43)  | -1.61)  |        | 5.64)  | 2.63)   | -2.35)  |        |
|                  | 28.43   | 24.53   | -0.53   |        | 420.08   | 407.78   | -0.03   |        | 260.56   | 158.61   | -1.55   |        | 3.81   | 2.07    | -1.92   |        |
| Panama           | (25.10, | (22.15, | (-0.68, | <0.001 | (407.06, | (397.89, | (-0.14, | 0.651  | (250.31, | (152.47, | (-1.87, | <0.001 | (2.65, | (1.43,  | (-2.31, | <0.001 |
|                  | 32.10)  | 27.10)  | -0.39)  |        | 433.42)  | 417.85)  | 0.09)   |        | 271.15)  | 164.95)  | -1.22)  |        | 5.32)  | 2.92)   | -1.54)  |        |
|                  | 74.67   | 76.03   | 0.09    |        | 579.38   | 586.90   | 0.08    |        | 764.30   | 799.73   | 0.22    |        | 11.37  | 11.90   | 0.22    |        |
| Papua New Guinea | (70.30, | (73.31, | (0.01,  | 0.035  | (567.10, | (579.29, | (0.05,  | <0.001 | (750.21, | (790.87, | (0.08,  | 0.004  | (9.69, | (10.84, | (0.06,  | 0.009  |
|                  | 79.25)  | 78.84)  | 0.18)   |        | 591.88)  | 594.60)  | 0.12)   |        | 778.60)  | 808.68)  | 0.36)   |        | 13.26) | 13.04)  | 0.39)   |        |
|                  | 35.28   | 31.17   | -0.54   |        | 456.22   | 452.80   | -0.07   |        | 356.52   | 209.99   | -2.15   |        | 5.51   | 2.95    | -2.53   |        |
| Paraguay         | (32.28, | (29.17, | (-0.64, | <0.001 | (445.34, | (445.13, | (-0.12, | 0.032  | (346.83, | (204.77, | (-2.38, | <0.001 | (4.35, | (2.36,  | (-2.80, | <0.001 |
|                  | 38.50)  | 33.26)  | -0.44)  |        | 467.31)  | 460.58)  | -0.01)  |        | 366.41)  | 215.32)  | -1.92)  |        | 6.88)  | 3.65)   | -2.26)  |        |
|                  | 41.46   | 30.01   | -1.19   |        | 473.09   | 406.15   | -0.47   |        | 529.03   | 264.03   | -2.27   |        | 8.13   | 3.79    | -2.50   |        |
| Peru             | (40.07, | (29.10, | (-1.31, | <0.001 | (468.33, | (402.78, | (-0.55, | <0.001 | (524.10, | (261.31, | (-2.56, | <0.001 | (7.52, | (3.47,  | (-2.83, | <0.001 |
|                  | 42.88)  | 30.95)  | -1.08)  |        | 477.89)  | 409.54)  | -0.39)  |        | 534.01)  | 266.77)  | -1.97)  |        | 8.78)  | 4.13)   | -2.17)  |        |
|                  | 45.38   | 39.59   | -0.40   |        | 471.98   | 453.39   | -0.03   |        | 238.06   | 499.94   | 3.46    |        | 2.57   | 7.23    | 4.33    |        |
| Philippines      | (44.51, | (39.00, | (-0.48, | <0.001 | (469.20, | (451.41, | (-0.13, | 0.566  | (236.07, | (497.85, | (2.64,  | <0.001 | (2.37, | (6.98,  | (3.14,  | <0.001 |
|                  | 46.25)  | 40.18)  | -0.32)  |        | 474.78)  | 455.37)  | 0.07)   |        | 240.06)  | 502.04)  | 4.29)   |        | 2.79)  | 7.48)   | 5.53)   |        |
| Poland           | 31.86   | 21.34   | -1.73   | <0.001 | 344.65   | 309.88   | -0.39   | 0.002  | 379.24   | 176.85   | -2.92   | <0.001 | 5.49   | 2.00    | -3.80   | <0.001 |



|                          |         |         |         |        |          |          |         |        |          |          |         |        |         |        |         |        |
|--------------------------|---------|---------|---------|--------|----------|----------|---------|--------|----------|----------|---------|--------|---------|--------|---------|--------|
|                          | (30.97, | (20.57, | (-1.96, |        | (341.72, | (306.91, | (-0.63, |        | (376.19, | (174.65, | (-3.07, |        | (5.13,  | (1.78, | (-3.94, |        |
|                          | 32.76)  | 22.15)  | -1.49)  |        | 347.61)  | 312.88)  | -0.16)  |        | 382.30)  | 179.08)  | -2.77)  |        | 5.87)   | 2.24)  | -3.65)  |        |
|                          | 24.04   | 12.81   | -2.58   |        | 329.36   | 284.12   | -0.52   |        | 337.80   | 97.34    | -5.33   |        | 5.04    | 0.99   | -6.65   |        |
| Portugal                 | (22.50, | (11.60, | (-2.75, | <0.001 | (323.59, | (278.27, | (-0.65, | <0.001 | (331.95, | (93.99,  | (-5.76, | <0.001 | (4.35,  | (0.69, | (-7.29, | <0.001 |
|                          | 25.66)  | 14.13)  | -2.41)  |        | 335.22)  | 290.07)  | -0.38)  |        | 343.73)  | 100.80)  | -4.89)  |        | 5.81)   | 1.40)  | -6.01)  |        |
|                          | 29.81   | 29.26   | -0.16   |        | 413.15   | 411.07   | 0.27    |        | 197.41   | 111.88   | -2.46   |        | 2.77    | 1.29   | -3.41   |        |
| Puerto Rico              | (27.00, | (26.21, | (-0.30, | 0.031  | (402.52, | (399.39, | (0.14,  | <0.001 | (190.07, | (105.85, | (-2.67, | <0.001 | (1.96,  | (0.72, | (-3.70, | <0.001 |
|                          | 32.83)  | 32.57)  | -0.02)  |        | 423.98)  | 423.00)  | 0.40)   |        | 204.96)  | 118.17)  | -2.25)  |        | 3.80)   | 2.14)  | -3.12)  |        |
|                          | 39.55   | 30.68   | -1.10   |        | 499.18   | 429.90   | -0.59   |        | 321.21   | 155.89   | -2.84   |        | 4.24    | 1.60   | -3.81   |        |
| Qatar                    | (32.01, | (27.92, | (-1.27, | <0.001 | (471.31, | (419.41, | (-0.63, | <0.001 | (298.26, | (149.38, | (-3.05, | <0.001 | (2.02,  | (1.02, | (-4.11, | <0.001 |
|                          | 48.81)  | 33.81)  | -0.94)  |        | 528.65)  | 440.74)  | -0.55)  |        | 345.83)  | 162.77)  | -2.64)  |        | 8.50)   | 2.65)  | -3.52)  |        |
|                          | 34.50   | 18.13   | -2.85   |        | 330.43   | 241.72   | -1.44   |        | 498.53   | 116.85   | -5.50   |        | 7.62    | 1.27   | -6.74   |        |
| Republic of Korea        | (33.69, | (17.53, | (-3.08, | <0.001 | (327.93, | (239.48, | (-1.61, | <0.001 | (495.46, | (115.31, | (-5.82, | <0.001 | (7.25,  | (1.12, | (-7.04, | <0.001 |
|                          | 35.32)  | 18.76)  | -2.61)  |        | 332.93)  | 243.98)  | -1.26)  |        | 501.61)  | 118.41)  | -5.17)  |        | 8.01)   | 1.44)  | -6.45)  |        |
|                          | 33.68   | 29.96   | -0.35   |        | 335.35   | 324.40   | -0.12   |        | 306.64   | 197.97   | -1.84   |        | 4.22    | 2.35   | -2.30   |        |
| Republic of<br>Moldova   | (31.08, | (27.18, | (-0.41, | <0.001 | (327.02, | (315.09, | (-0.15, | <0.001 | (298.68, | (190.78, | (-2.23, | <0.001 | (3.34,  | (1.64, | (-2.83, | <0.001 |
|                          | 36.46)  | 33.00)  | -0.30)  |        | 343.86)  | 333.97)  | -0.10)  |        | 314.79)  | 205.42)  | -1.45)  |        | 5.29)   | 3.33)  | -1.77)  |        |
|                          | 33.23   | 24.74   | -1.23   |        | 378.49   | 356.89   | -0.11   |        | 343.14   | 235.00   | -1.66   |        | 4.77    | 2.88   | -2.19   |        |
| Romania                  | (32.04, | (23.49, | (-1.30, | <0.001 | (374.41, | (352.11, | (-0.23, | 0.056  | (339.28, | (231.15, | (-1.92, | <0.001 | (4.33,  | (2.48, | (-2.55, | <0.001 |
|                          | 34.47)  | 26.04)  | -1.15)  |        | 382.60)  | 361.73)  | 0.00)   |        | 347.04)  | 238.91)  | -1.39)  |        | 5.25)   | 3.34)  | -1.83)  |        |
|                          | 35.90   | 31.99   | -0.38   |        | 367.75   | 381.04   | 0.15    |        | 322.74   | 358.11   | -0.11   |        | 4.38    | 5.04   | -0.14   |        |
| Russian Federation       | (35.43, | (31.51, | (-0.67, | 0.013  | (366.24, | (379.35, | (0.05,  | 0.005  | (321.32, | (356.52, | (-0.84, | 0.770  | (4.22,  | (4.85, | (-1.01, | 0.757  |
|                          | 36.37)  | 32.48)  | -0.09)  |        | 369.26)  | 382.73)  | 0.26)   |        | 324.16)  | 359.70)  | 0.64)   |        | 4.55)   | 5.23)  | 0.75)   |        |
|                          | 60.22   | 20.77   | -4.53   |        | 568.84   | 408.19   | -1.39   |        | 825.03   | 303.98   | -4.47   |        | 13.02   | 4.30   | -4.94   |        |
| Rwanda                   | (57.15, | (19.53, | (-4.92, | <0.001 | (559.49, | (402.70, | (-1.56, | <0.001 | (813.69, | (299.20, | (-4.93, | <0.001 | (11.62, | (3.74, | (-5.44, | <0.001 |
|                          | 63.41)  | 22.06)  | -4.14)  |        | 578.32)  | 413.75)  | -1.22)  |        | 836.50)  | 308.81)  | -4.01)  |        | 14.56)  | 4.91)  | -4.44)  |        |
|                          | 52.14   | 32.73   | -2.01   |        | 574.41   | 496.45   | -0.54   |        | 836.88   | 231.55   | -4.17   |        | 13.98   | 3.21   | -4.92   |        |
| Saint Kitts and<br>Nevis | (22.89, | (13.87, | (-2.22, | <0.001 | (463.95, | (410.13, | (-0.66, | <0.001 | (700.76, | (173.89, | (-4.71, | <0.001 | (1.95,  | (0.03, | (-5.47, | <0.001 |
|                          | 102.81) | 66.52)  | -1.79)  |        | 704.26)  | 596.34)  | -0.43)  |        | 992.52)  | 303.05)  | -3.63)  |        | 49.39)  | 23.91) | -4.36)  |        |
|                          | 40.84   | 32.76   | -0.93   |        | 547.42   | 489.18   | -0.36   |        | 411.08   | 230.31   | -2.22   |        | 6.41    | 3.27   | -2.60   |        |
| Saint Lucia              | (24.66, | (20.68, | (-1.10, | <0.001 | (483.86, | (438.27, | (-0.47, | <0.001 | (355.01, | (195.95, | (-2.47, | <0.001 | (1.28,  | (0.48, | (-2.89, | <0.001 |
|                          | 64.27)  | 49.58)  | -0.75)  |        | 617.57)  | 544.56)  | -0.24)  |        | 473.95)  | 269.17)  | -1.96)  |        | 19.77)  | 11.45) | -2.31)  |        |
| Saint Vincent and        | 33.00   | 33.19   | -0.16   | 0.001  | 436.21   | 458.54   | 0.20    | <0.001 | 418.90   | 278.35   | -2.05   | <0.001 | 6.63    | 4.13   | -2.35   | <0.001 |

|                       |         |         |         |        |          |          |         |        |          |          |         |        |        |         |         |        |
|-----------------------|---------|---------|---------|--------|----------|----------|---------|--------|----------|----------|---------|--------|--------|---------|---------|--------|
| the Grenadines        | (17.44, | (18.13, | (-0.24, |        | (373.83, | (396.10, | (0.14,  |        | (356.94, | (230.22, | (-2.35, | (1.11, | (0.40, | (-2.68, |         |        |
|                       | 57.75)  | 55.90)  | -0.07)  |        | 506.83)  | 528.17)  | 0.25)   |        | 489.25)  | 333.71)  | -1.75)  | 22.52) | 16.45) | -2.01)  |         |        |
|                       | 66.50   | 59.31   | -0.45   |        | 624.33   | 599.50   | -0.13   |        | 840.21   | 853.51   | -0.01   | 12.56  | 12.83  | -0.01   |         |        |
| Samoa                 | (46.47, | (43.05, | (-0.50, | <0.001 | (559.28, | (544.95, | (-0.18, | <0.001 | (764.29, | (788.03, | (-0.10, | 0.904  | (4.86, | (5.96,  | (-0.13, | 0.863  |
|                       | 92.82)  | 79.93)  | -0.40)  |        | 695.35)  | 658.24)  | -0.07)  |        | 922.11)  | 923.17)  | 0.09)   |        | 27.21) | 24.39)  | 0.11)   |        |
|                       | 16.14   | 14.91   | -0.31   |        | 235.78   | 230.51   | -0.01   |        | 110.26   | 89.58    | -0.67   |        | 1.29   | 0.93    | -1.11   |        |
| San Marino            | (1.05,  | (1.18,  | (-0.37, | <0.001 | (145.88, | (148.20, | (-0.11, | 0.906  | (52.35,  | (41.97,  | (-0.80, | <0.001 | (0.00, | (0.00,  | (-1.30, | <0.001 |
|                       | 72.60)  | 65.04)  | -0.26)  |        | 361.45)  | 343.78)  | 0.10)   |        | 205.13)  | 169.44)  | -0.54)  |        | 46.36) | 41.08)  | -0.92)  |        |
|                       | 58.24   | 53.41   | -0.50   |        | 640.49   | 650.66   | -0.01   |        | 479.97   | 480.91   | -0.62   |        | 7.01   | 6.81    | -0.88   |        |
| Sao Tome and Principe | (35.41, | (38.69, | (-0.61, | <0.001 | (558.93, | (596.49, | (-0.06, | 0.799  | (408.00, | (434.48, | (-1.13, | 0.020  | (1.00, | (2.36,  | (-1.45, | 0.004  |
|                       | 91.42)  | 72.03)  | -0.40)  |        | 731.56)  | 708.55)  | 0.05)   |        | 561.77)  | 531.08)  | -0.11)  |        | 25.25) | 15.52)  | -0.30)  |        |
|                       | 28.08   | 34.99   | 0.92    |        | 637.13   | 683.81   | 0.44    |        | 421.80   | 347.28   | -0.41   |        | 5.79   | 4.42    | -0.61   |        |
| Saudi Arabia          | (26.77, | (34.17, | (0.67,  | <0.001 | (630.92, | (680.07, | (-0.02, | 0.060  | (416.68, | (344.69, | (-0.63, | <0.001 | (5.20, | (4.14,  | (-0.86, | <0.001 |
|                       | 29.44)  | 35.83)  | 1.16)   |        | 643.38)  | 687.58)  | 0.89)   |        | 426.97)  | 349.89)  | -0.20)  |        | 6.43)  | 4.72)   | -0.35)  |        |
|                       | 37.13   | 30.52   | -0.80   |        | 505.72   | 461.07   | -0.27   |        | 435.41   | 325.58   | -0.86   |        | 6.38   | 4.55    | -1.00   |        |
| Senegal               | (34.70, | (29.06, | (-0.90, | <0.001 | (496.77, | (455.43, | (-0.36, | <0.001 | (427.03, | (320.82, | (-1.03, | <0.001 | (5.39, | (4.00,  | (-1.20, | <0.001 |
|                       | 39.70)  | 32.03)  | -0.70)  |        | 514.81)  | 466.76)  | -0.19)  |        | 443.92)  | 330.40)  | -0.69)  |        | 7.51)  | 5.16)   | -0.80)  |        |
|                       | 36.53   | 25.77   | -1.51   |        | 397.16   | 390.19   | -0.05   |        | 467.28   | 206.85   | -3.30   |        | 6.84   | 2.30    | -4.33   |        |
| Serbia                | (34.58, | (23.98, | (-1.63, | <0.001 | (390.66, | (383.11, | (-0.17, | 0.433  | (460.23, | (201.74, | (-3.54, | <0.001 | (6.02, | (1.80,  | (-4.67, | <0.001 |
|                       | 38.56)  | 27.67)  | -1.38)  |        | 403.75)  | 397.38)  | 0.07)   |        | 474.41)  | 212.07)  | -3.05)  |        | 7.76)  | 2.92)   | -3.98)  |        |
|                       | 37.25   | 33.79   | -0.46   |        | 462.55   | 445.40   | -0.15   |        | 570.25   | 367.25   | -1.57   |        | 8.47   | 4.86    | -2.01   |        |
| Seychelles            | (18.17, | (18.31, | (-0.57, | <0.001 | (386.94, | (382.59, | (-0.24, | 0.001  | (484.33, | (310.72, | (-1.78, | <0.001 | (1.23, | (0.60,  | (-2.25, | <0.001 |
|                       | 69.12)  | 58.17)  | -0.34)  |        | 549.67)  | 516.36)  | -0.07)  |        | 667.88)  | 431.91)  | -1.37)  |        | 30.15) | 19.39)  | -1.77)  |        |
|                       | 42.90   | 42.24   | -0.02   |        | 539.68   | 525.39   | 0.01    |        | 485.68   | 476.49   | 0.14    |        | 7.19   | 7.05    | 0.16    |        |
| Sierra Leone          | (39.33, | (39.96, | (-0.14, | 0.763  | (526.95, | (517.40, | (-0.05, | 0.760  | (473.55, | (468.84, | (-0.05, | 0.145  | (5.77, | (6.13,  | (-0.07, | 0.165  |
|                       | 46.72)  | 44.63)  | 0.10)   |        | 552.64)  | 533.48)  | 0.07)   |        | 498.05)  | 484.25)  | 0.34)   |        | 8.87)  | 8.06)   | 0.38)   |        |
|                       | 24.70   | 18.06   | -1.30   |        | 265.86   | 221.58   | -0.66   |        | 193.02   | 73.92    | -3.43   |        | 2.52   | 0.53    | -5.57   |        |
| Singapore             | (22.27, | (16.39, | (-1.48, | <0.001 | (257.75, | (215.48, | (-0.77, | <0.001 | (186.11, | (70.36,  | (-3.66, | <0.001 | (1.79, | (0.28,  | (-5.80, | <0.001 |
|                       | 27.34)  | 19.91)  | -1.13)  |        | 274.17)  | 227.84)  | -0.54)  |        | 200.13)  | 77.66)   | -3.20)  |        | 3.47)  | 0.99)   | -5.34)  |        |
|                       | 32.11   | 24.93   | -1.03   |        | 365.45   | 311.68   | -0.62   |        | 309.77   | 148.52   | -2.58   |        | 4.19   | 1.48    | -3.63   |        |
| Slovakia              | (29.75, | (22.75, | (-1.15, | <0.001 | (357.39, | (303.87, | (-0.72, | <0.001 | (302.38, | (143.13, | (-2.73, | <0.001 | (3.37, | (1.00,  | (-3.81, | <0.001 |
|                       | 34.61)  | 27.30)  | -0.91)  |        | 373.66)  | 319.67)  | -0.51)  |        | 317.30)  | 154.09)  | -2.43)  |        | 5.15)  | 2.16)   | -3.45)  |        |
| Slovenia              | 24.40   | 19.29   | -1.20   | <0.001 | 280.08   | 233.62   | -0.73   | <0.001 | 233.23   | 89.19    | -3.85   | <0.001 | 3.09   | 0.66    | -5.95   | <0.001 |

|                 |         |         |         |        |          |          |         |        |          |          |         |        |         |         |         |        |
|-----------------|---------|---------|---------|--------|----------|----------|---------|--------|----------|----------|---------|--------|---------|---------|---------|--------|
|                 | (21.11, | (16.03, | (-1.43, |        | (268.66, | (222.04, | (-0.86, |        | (222.86, | (81.97,  | (-4.05, | (2.01, | (0.19,  | (-6.23, |         |        |
|                 | 28.09)  | 23.11)  | -0.96)  |        | 291.89)  | 245.73)  | -0.60)  |        | 244.00)  | 96.95)   | -3.66)  | 4.59)  | 1.82)   | -5.67)  |         |        |
|                 |         |         |         |        |          |          |         |        | 1470.71  | 1511.25  |         |        |         |         |         |        |
|                 | 91.55   | 77.14   | -0.59   |        | 607.69   | 557.83   | -0.25   |        | (1396.22 | (1462.34 | 0.27    | 24.19  | 25.02   | 0.30    |         |        |
| Solomon Islands | (73.78, | (66.41, | (-0.63, | <0.001 | (560.97, | (528.49, | (-0.32, | <0.001 |          |          | (0.16,  | <0.001 | (15.43, | (19.06, | (0.18,  | <0.001 |
|                 | 112.51) | 89.13)  | -0.56)  |        | 657.46)  | 588.41)  | -0.18)  |        |          |          | 0.38)   | 36.33) | 32.28)  | 0.42)   |         |        |
|                 |         |         |         |        |          |          |         |        | 1548.31) | 1561.40) |         |        |         |         |         |        |
|                 | 47.02   | 34.44   | -1.37   |        | 508.28   | 473.44   | -0.24   |        | 652.30   | 495.13   | -0.99   | 10.19  | 7.47    | -1.11   |         |        |
| Somalia         | (44.26, | (33.03, | (-1.52, | <0.001 | (499.20, | (468.34, | (-0.34, | <0.001 | (641.97, | (489.85, | (-1.13, | <0.001 | (8.93,  | (6.83,  | (-1.26, | <0.001 |
|                 | 49.90)  | 35.88)  | -1.23)  |        | 517.49)  | 478.60)  | -0.15)  |        | 662.77)  | 500.45)  | -0.85)  | 11.58) | 8.16)   | -0.95)  |         |        |
|                 | 35.81   | 21.46   | -2.18   |        | 588.02   | 496.78   | -0.73   |        | 574.78   | 252.15   | -3.31   | 8.82   | 3.30    | -3.82   |         |        |
| South Africa    | (34.84, | (20.88, | (-2.63, | <0.001 | (584.13, | (493.97, | (-0.83, | <0.001 | (570.83, | (250.18, | (-4.41, | <0.001 | (8.33,  | (3.08,  | (-5.16, | <0.001 |
|                 | 36.81)  | 22.05)  | -1.74)  |        | 591.94)  | 499.60)  | -0.63)  |        | 578.74)  | 254.14)  | -2.19)  | 9.33)  | 3.53)   | -2.46)  |         |        |
|                 | 33.05   | 27.17   | -0.82   |        | 485.47   | 493.09   | 0.07    |        | 399.47   | 281.26   | -1.40   | 5.83   | 3.73    | -1.78   |         |        |
| South Sudan     | (30.50, | (25.30, | (-0.94, | <0.001 | (475.83, | (485.13, | (-0.02, | 0.118  | (390.57, | (275.23, | (-1.67, | <0.001 | (4.79,  | (3.05,  | (-2.10, | <0.001 |
|                 | 35.77)  | 29.14)  | -0.70)  |        | 495.26)  | 501.14)  | 0.16)   |        | 408.53)  | 287.40)  | -1.13)  | 7.06)  | 4.51)   | -1.46)  |         |        |
|                 | 19.43   | 13.45   | -1.91   |        | 267.70   | 240.60   | -0.44   |        | 266.92   | 86.05    | -4.36   | 3.85   | 0.86    | -5.85   |         |        |
| Spain           | (18.72, | (12.84, | (-2.14, | <0.001 | (265.04, | (237.99, | (-0.57, | <0.001 | (264.28, | (84.50,  | (-4.66, | <0.001 | (3.54,  | (0.72,  | (-6.13, | <0.001 |
|                 | 20.16)  | 14.08)  | -1.67)  |        | 270.37)  | 243.23)  | -0.31)  |        | 269.59)  | 87.63)   | -4.06)  | 4.18)  | 1.03)   | -5.57)  |         |        |
|                 | 26.15   | 24.58   | -0.30   |        | 382.72   | 381.75   | 0.03    |        | 315.02   | 236.98   | -0.92   | 4.06   | 2.74    | -1.29   |         |        |
| Sri Lanka       | (24.98, | (23.51, | (-0.38, | <0.001 | (378.21, | (377.53, | (-0.07, | 0.521  | (310.94, | (233.65, | (-1.21, | <0.001 | (3.60,  | (2.39,  | (-1.69, | <0.001 |
|                 | 27.36)  | 25.68)  | -0.21)  |        | 387.27)  | 386.02)  | 0.14)   |        | 319.15)  | 240.34)  | -0.64)  | 4.55)  | 3.12)   | -0.89)  |         |        |
|                 | 51.01   | 47.67   | -0.29   |        | 502.62   | 515.24   | 0.13    |        | 756.89   | 478.91   | -1.52   | 11.80  | 6.93    | -1.77   |         |        |
| Sudan           | (49.30, | (46.59, | (-0.39, | <0.001 | (497.25, | (511.70, | (0.04,  | 0.005  | (750.30, | (475.50, | (-1.62, | <0.001 | (10.99, | (6.52,  | (-1.88, | <0.001 |
|                 | 52.78)  | 48.77)  | -0.19)  |        | 508.04)  | 518.80)  | 0.22)   |        | 763.53)  | 482.33)  | -1.42)  | 12.67) | 7.36)   | -1.65)  |         |        |
|                 | 40.42   | 36.42   | -0.50   |        | 480.05   | 485.50   | 0.06    |        | 539.91   | 403.67   | -1.48   | 8.64   | 6.29    | -1.60   |         |        |
| Suriname        | (30.49, | (28.82, | (-0.57, | <0.001 | (444.66, | (456.52, | (-0.03, | 0.197  | (502.01, | (377.30, | (-1.89, | <0.001 | (4.43,  | (3.40,  | (-2.05, | <0.001 |
|                 | 52.74)  | 45.44)  | -0.43)  |        | 517.70)  | 515.87)  | 0.15)   |        | 580.08)  | 431.42)  | -1.06)  | 15.42) | 10.67)  | -1.15)  |         |        |
|                 | 19.39   | 19.05   | 0.03    |        | 397.26   | 534.76   | 1.37    |        | 157.15   | 103.51   | -1.36   | 1.78   | 0.54    | -4.14   |         |        |
| Sweden          | (17.85, | (17.58, | (-0.33, | 0.879  | (390.15, | (526.82, | (1.12,  | <0.001 | (152.71, | (100.05, | (-1.62, | <0.001 | (1.34,  | (0.33,  | (-4.32, | <0.001 |
|                 | 21.04)  | 20.63)  | 0.38)   |        | 404.48)  | 542.80)  | 1.63)   |        | 161.69)  | 107.07)  | -1.10)  | 2.33)  | 0.87)   | -3.97)  |         |        |
|                 | 15.91   | 13.04   | -0.82   |        | 218.17   | 196.99   | -0.36   |        | 131.85   | 53.39    | -3.70   | 1.68   | 0.38    | -6.12   |         |        |
| Switzerland     | (14.44, | (11.76, | (-0.96, | <0.001 | (212.67, | (191.95, | (-0.50, | <0.001 | (127.58, | (50.77,  | (-4.01, | <0.001 | (1.24,  | (0.19,  | (-6.49, | <0.001 |
|                 | 17.50)  | 14.44)  | -0.69)  |        | 223.78)  | 202.14)  | -0.21)  |        | 136.24)  | 56.12)   | -3.40)  | 2.26)  | 0.70)   | -5.74)  |         |        |

|                            |         |         |         |        |          |          |         |        |          |          |         |        |         |         |         |        |
|----------------------------|---------|---------|---------|--------|----------|----------|---------|--------|----------|----------|---------|--------|---------|---------|---------|--------|
| Syrian Arab Republic       | 63.73   | 43.32   | -1.66   |        | 632.82   | 544.42   | -0.65   |        | 1012.58  | 500.36   | -2.81   |        | 15.46   | 7.02    | -3.16   |        |
|                            | (61.30, | (41.42, | (-1.87, | <0.001 | (625.02, | (537.62, | (-0.72, | <0.001 | (1002.98 | (493.92, | (-3.18, | <0.001 | (14.28, | (6.28,  | (-3.58, | <0.001 |
|                            | 66.24)  | 45.29)  | -1.45)  |        | 640.70)  | 551.29)  | -0.58)  |        |          | 506.88)  | -2.43)  |        | 16.72)  | 7.85)   | -2.74)  |        |
| Taiwan (Province of China) | 27.44   | 24.27   | -0.51   |        | 341.95   | 341.96   | -0.03   |        | 343.42   | 204.72   | -1.98   |        | 4.73    | 2.36    | -2.65   |        |
|                            | (26.39, | (23.22, | (-0.58, | <0.001 | (338.21, | (338.00, | (-0.12, | 0.504  | (339.67, | (201.74, | (-2.12, | <0.001 | (4.30,  | (2.06,  | (-2.83, | <0.001 |
|                            | 28.53)  | 25.36)  | -0.44)  |        | 345.72)  | 345.97)  | 0.06)   |        | 347.19)  | 207.75)  | -1.85)  |        | 5.19)   | 2.71)   | -2.47)  |        |
| Tajikistan                 | 30.79   | 27.15   | -0.35   |        | 278.26   | 264.00   | -0.11   |        | 309.02   | 236.65   | -1.95   |        | 4.50    | 3.22    | -2.37   |        |
|                            | (28.29, | (25.54, | (-0.62, | 0.015  | (270.62, | (258.92, | (-0.26, | 0.168  | (300.82, | (231.81, | (-2.34, | <0.001 | (3.55,  | (2.68,  | (-2.82, | <0.001 |
|                            | 33.48)  | 28.84)  | -0.07)  |        | 286.07)  | 269.16)  | 0.05)   |        | 317.40)  | 241.56)  | -1.56)  |        | 5.65)   | 3.85)   | -1.92)  |        |
| Thailand                   | 33.26   | 31.35   | -0.60   |        | 384.39   | 360.61   | -0.36   |        | 406.18   | 458.81   | -0.72   |        | 5.80    | 6.73    | -0.83   |        |
|                            | (32.55, | (30.66, | (-0.78, | <0.001 | (381.94, | (358.29, | (-0.48, | <0.001 | (403.65, | (456.19, | (-1.39, | 0.037  | (5.49,  | (6.42,  | (-1.59, | 0.037  |
|                            | 33.99)  | 32.04)  | -0.42)  |        | 386.84)  | 362.95)  | -0.25)  |        | 408.72)  | 461.43)  | -0.05)  |        | 6.11)   | 7.05)   | -0.05)  |        |
| Timor-Leste                | 48.64   | 43.63   | -0.40   |        | 482.08   | 471.59   | 0.01    |        | 403.98   | 485.96   | 0.89    |        | 5.47    | 6.84    | 1.08    |        |
|                            | (40.97, | (37.63, | (-0.48, | <0.001 | (457.27, | (451.43, | (-0.08, | 0.893  | (381.11, | (465.40, | (0.60,  | <0.001 | (3.09,  | (4.57,  | (0.74,  | <0.001 |
|                            | 57.40)  | 50.39)  | -0.31)  |        | 507.95)  | 492.48)  | 0.09)   |        | 427.93)  | 507.25)  | 1.18)   |        | 9.03)   | 9.91)   | 1.43)   |        |
| Togo                       | 40.22   | 34.51   | -0.57   |        | 517.03   | 484.32   | -0.16   |        | 506.69   | 414.02   | -0.64   |        | 7.60    | 6.05    | -0.72   |        |
|                            | (36.65, | (32.43, | (-0.60, | <0.001 | (504.21, | (476.50, | (-0.23, | <0.001 | (493.88, | (406.75, | (-0.73, | <0.001 | (6.08,  | (5.19,  | (-0.82, | <0.001 |
|                            | 44.06)  | 36.69)  | -0.54)  |        | 530.12)  | 492.24)  | -0.10)  |        | 519.77)  | 421.38)  | -0.55)  |        | 9.39)   | 7.01)   | -0.62)  |        |
| Tokelau                    | 60.43   | 51.12   | -0.66   |        | 578.42   | 541.03   | -0.24   |        | 906.68   | 765.12   | -0.58   |        | 13.89   | 11.49   | -0.64   |        |
|                            | (0.00,  | (0.00,  | (-0.70, | <0.001 | (122.67, | (89.58,  | (-0.28, | <0.001 | (286.88, | (184.79, | (-0.69, | <0.001 | (0.00,  | (0.00,  | (-0.76, | <0.001 |
|                            | 929.92) | 984.43) | -0.63)  |        | 1747.97) | 1790.45) | -0.21)  |        | 2216.82) | 2126.41) | -0.48)  |        | 846.61) | 909.74) | -0.52)  |        |
| Tonga                      | 44.20   | 40.45   | -0.35   |        | 517.60   | 509.55   | -0.01   |        | 386.22   | 386.58   | 0.04    |        | 4.98    | 4.93    | -0.03   |        |
|                            | (23.60, | (22.31, | (-0.50, | <0.001 | (438.75, | (437.73, | (-0.10, | 0.894  | (317.97, | (324.53, | (-0.01, | 0.084  | (0.31,  | (0.46,  | (-0.08, | 0.214  |
|                            | 76.83)  | 67.83)  | -0.20)  |        | 607.52)  | 590.06)  | 0.09)   |        | 465.70)  | 457.35)  | 0.09)   |        | 24.04)  | 19.94)  | 0.02)   |        |
| Trinidad and Tobago        | 42.06   | 34.65   | -0.83   |        | 539.47   | 507.65   | -0.26   |        | 398.94   | 237.41   | -2.27   |        | 6.05    | 3.31    | -2.63   |        |
|                            | (36.46, | (29.89, | (-0.91, | <0.001 | (519.03, | (488.70, | (-0.32, | <0.001 | (381.37, | (224.54, | (-2.56, | <0.001 | (4.06,  | (1.96,  | (-2.98, | <0.001 |
|                            | 48.30)  | 40.01)  | -0.74)  |        | 560.54)  | 527.20)  | -0.21)  |        | 417.14)  | 250.87)  | -1.97)  |        | 8.71)   | 5.31)   | -2.28)  |        |
| Tunisia                    | 29.28   | 30.03   | 0.10    |        | 277.28   | 334.15   | 0.27    |        | 282.27   | 213.16   | -1.10   |        | 4.13    | 2.79    | -1.46   |        |
|                            | (27.40, | (28.48, | (0.04,  | 0.003  | (271.43, | (328.92, | (0.13,  | <0.001 | (276.34, | (209.00, | (-1.18, | <0.001 | (3.43,  | (2.33,  | (-1.54, | <0.001 |
|                            | 31.27)  | 31.66)  | 0.16)   |        | 283.22)  | 339.45)  | 0.41)   |        | 288.30)  | 217.39)  | -1.02)  |        | 4.93)   | 3.31)   | -1.37)  |        |
| Turkey                     | 37.81   | 29.71   | -1.05   |        | 467.80   | 409.01   | -0.47   |        | 293.63   | 171.49   | -1.97   |        | 3.90    | 1.90    | -2.66   |        |
|                            | (37.02, | (29.14, | (-1.16, | <0.001 | (465.00, | (406.90, | (-0.52, | <0.001 | (291.40, | (170.12, | (-2.14, | <0.001 | (3.64,  | (1.76,  | (-2.90, | <0.001 |

|                                 |         |         |         |        |          |          |         |        |          |          |         |        |         |         |         |        |
|---------------------------------|---------|---------|---------|--------|----------|----------|---------|--------|----------|----------|---------|--------|---------|---------|---------|--------|
|                                 | 38.62)  | 30.28)  | -0.93)  |        | 470.62)  | 411.13)  | -0.42)  |        | 295.87)  | 172.86)  | -1.81)  |        | 4.17)   | 2.05)   | -2.43)  |        |
|                                 | 35.61)  | 50.04)  | 1.24)   |        | 351.25)  | 421.70)  | 0.68)   |        | 395.94)  | 611.64)  | 1.56)   |        | 5.77)   | 9.27)   | 1.70)   |        |
| Turkmenistan                    | (32.52, | (47.04, | (1.04,  | <0.001 | (341.41, | (412.89, | (0.60,  | <0.001 | (385.41, | (600.99, | (1.08,  | <0.001 | (4.55,  | (8.00,  | (1.15,  | <0.001 |
|                                 | 38.93)  | 53.20)  | 1.44)   |        | 361.31)  | 430.67)  | 0.76)   |        | 406.69)  | 622.43)  | 2.05)   |        | 7.23)   | 10.69)  | 2.26)   |        |
|                                 | 75.57)  | 58.47)  | -1.01)  |        | 616.76)  | 543.55)  | -0.47)  |        | 1305.95) | 1150.00) | -0.25)  |        | 20.67)  | 18.25)  | -0.22)  |        |
| Tuvalu                          | (13.67, | (10.37, | (-1.08, | <0.001 | (385.58, | (350.13, | (-0.53, | <0.001 | (956.75, | (858.29, | (-0.32, | <0.001 | (0.16,  | (0.22,  | (-0.30, | <0.001 |
|                                 | 236.45) | 187.15) | -0.93)  |        | 937.22)  | 808.43)  | -0.41)  |        | 1742.48) | 1511.68) | -0.18)  |        | 147.63) | 123.10) | -0.14)  |        |
|                                 | 29.65)  | 21.93)  | -1.52)  |        | 461.08)  | 434.05)  | -0.29)  |        | 366.08)  | 329.94)  | -1.38)  |        | 5.29)   | 4.66)   | -1.62)  |        |
| Uganda                          | (28.18, | (21.14, | (-1.73, | <0.001 | (455.41, | (430.60, | (-0.39, | <0.001 | (360.92, | (326.89, | (-1.81, | <0.001 | (4.67,  | (4.30,  | (-2.11, | <0.001 |
|                                 | 31.19)  | 22.74)  | -1.31)  |        | 466.82)  | 437.52)  | -0.19)  |        | 371.30)  | 333.01)  | -0.96)  |        | 5.96)   | 5.05)   | -1.13)  |        |
|                                 | 33.54)  | 39.90)  | 0.73)   |        | 426.13)  | 495.95)  | 0.59)   |        | 271.37)  | 453.96)  | 1.51)   |        | 3.32)   | 6.38)   | 1.85)   |        |
| Ukraine                         | (32.74, | (38.92, | (0.58,  | <0.001 | (423.25, | (492.41, | (0.47,  | <0.001 | (269.08, | (450.68, | (0.98,  | <0.001 | (3.07,  | (6.01,  | (1.18,  | <0.001 |
|                                 | 34.36)  | 40.90)  | 0.88)   |        | 429.02)  | 499.51)  | 0.70)   |        | 273.67)  | 457.26)  | 2.04)   |        | 3.58)   | 6.78)   | 2.53)   |        |
|                                 | 40.66)  | 40.95)  | 0.02)   |        | 553.22)  | 548.36)  | -0.04)  |        | 414.23)  | 304.20)  | -0.97)  |        | 5.82)   | 3.98)   | -1.15)  |        |
| United Arab<br>Emirates         | (36.80, | (38.87, | (-0.12, | 0.750  | (538.58, | (540.18, | (-0.17, | 0.531  | (401.48, | (298.53, | (-1.38, | <0.001 | (4.42,  | (3.40,  | (-1.66, | <0.001 |
|                                 | 44.92)  | 43.16)  | 0.16)   |        | 568.25)  | 556.66)  | 0.09)   |        | 427.38)  | 309.98)  | -0.56)  |        | 7.65)   | 4.68)   | -0.64)  |        |
|                                 | 17.95)  | 13.52)  | -1.24)  |        | 262.07)  | 238.39)  | -0.33)  |        | 181.25)  | 106.96)  | -2.11)  |        | 2.47)   | 1.24)   | -2.73)  |        |
| United Kingdom                  | (17.38, | (13.05, | (-1.40, | <0.001 | (259.89, | (236.38, | (-0.50, | <0.001 | (179.44, | (105.63, | (-2.26, | <0.001 | (2.26,  | (1.10,  | (-2.90, | <0.001 |
|                                 | 18.53)  | 14.01)  | -1.09)  |        | 264.26)  | 240.41)  | -0.16)  |        | 183.08)  | 108.30)  | -1.95)  |        | 2.69)   | 1.39)   | -2.56)  |        |
|                                 | 26.19)  | 23.14)  | -0.57)  |        | 449.30)  | 466.15)  | 0.21)   |        | 450.39)  | 325.71)  | -1.40)  |        | 6.75)   | 4.52)   | -1.74)  |        |
| United Republic of<br>Tanzania  | (25.09, | (22.47, | (-0.75, | <0.001 | (444.81, | (463.18, | (0.08,  | 0.003  | (445.82, | (323.20, | (-1.67, | <0.001 | (6.20,  | (4.23,  | (-2.04, | <0.001 |
|                                 | 27.33)  | 23.82)  | -0.40)  |        | 453.83)  | 469.12)  | 0.35)   |        | 455.01)  | 328.22)  | -1.13)  |        | 7.35)   | 4.83)   | -1.43)  |        |
|                                 | 18.44)  | 18.08)  | -0.25)  |        | 357.49)  | 444.86)  | 1.43)   |        | 184.50)  | 148.63)  | -0.46)  |        | 2.28)   | 1.46)   | -1.48)  |        |
| United States of<br>America     | (18.18, | (17.83, | (-0.43, | 0.012  | (356.35, | (443.62, | (0.98,  | <0.001 | (183.69, | (147.92, | (-0.57, | <0.001 | (2.19,  | (1.39,  | (-1.65, | <0.001 |
|                                 | 18.70)  | 18.33)  | -0.06)  |        | 358.63)  | 446.09)  | 1.88)   |        | 185.32)  | 149.34)  | -0.34)  |        | 2.37)   | 1.53)   | -1.31)  |        |
|                                 | 29.41)  | 29.42)  | -0.07)  |        | 407.87)  | 413.80)  | 0.15)   |        | 240.65)  | 133.63)  | -2.72)  |        | 3.53)   | 1.68)   | -3.15)  |        |
| United States<br>Virgin Islands | (15.02, | (13.62, | (-0.16, | 0.147  | (347.24, | (345.34, | (0.08,  | <0.001 | (194.73, | (96.40,  | (-3.28, | <0.001 | (0.22,  | (0.00,  | (-3.86, | <0.001 |
|                                 | 52.22)  | 56.09)  | 0.03)   |        | 476.32)  | 492.28)  | 0.21)   |        | 294.44)  | 181.05)  | -2.15)  |        | 16.45)  | 16.24)  | -2.42)  |        |
|                                 | 27.21)  | 21.70)  | -1.12)  |        | 309.73)  | 292.49)  | -0.38)  |        | 440.04)  | 199.08)  | -2.96)  |        | 6.78)   | 2.64)   | -3.52)  |        |
| Uruguay                         | (24.25, | (19.17, | (-1.27, | <0.001 | (299.53, | (282.99, | (-0.51, | <0.001 | (427.88, | (191.27, | (-3.17, | <0.001 | (5.35,  | (1.81,  | (-3.76, | <0.001 |
|                                 | 30.43)  | 24.48)  | -0.97)  |        | 320.18)  | 302.24)  | -0.26)  |        | 452.47)  | 207.14)  | -2.74)  |        | 8.49)   | 3.72)   | -3.28)  |        |
|                                 | 36.25)  | 32.01)  | -0.34)  |        | 342.16)  | 355.39)  | 0.15)   |        | 352.22)  | 344.73)  | -0.24)  |        | 5.04)   | 4.85)   | -0.34)  |        |
| Uzbekistan                      | (34.92, | (31.09, | (-0.42, | <0.001 | (338.06, | (352.30, | (0.08,  | <0.001 | (348.03, | (341.68, | (-0.55, | 0.132  | (4.55,  | (4.50,  | (-0.73, | 0.093  |

|                |         |         |         |        |          |          |         |        |           |           |         |        |         |         |         |        |
|----------------|---------|---------|---------|--------|----------|----------|---------|--------|-----------|-----------|---------|--------|---------|---------|---------|--------|
|                | 37.62)  | 32.95)  | -0.27)  |        | 346.31)  | 358.50)  | 0.23)   |        | 356.45)   | 347.79)   | 0.08)   | 5.58)  | 5.23)   | 0.06)   |         |        |
|                | 101.36) | 84.73)  | -0.72)  |        | 785.27)  | 708.46)  | -0.37)  |        | 1294.44)  | 1482.50)  | 0.03)   | 20.05) | 23.47)  | 0.04)   |         |        |
| Vanuatu        | (75.97, | (68.36, | (-0.77, | <0.001 | (711.42, | (659.52, | (-0.40, | <0.001 | (1199.00, | (1411.36, | (-0.12, | 0.718) | (9.78,  | (15.26, | (-0.11, | 0.566) |
|                | 132.80) | 103.97) | -0.67)  |        | 864.96)  | 760.18)  | -0.33)  |        | ,         | ,         | 0.17)   | 36.79) | 34.67)  | 0.20)   |         |        |
| Venezuela      | 34.09)  | 28.34)  | -0.76)  |        | 496.67)  | 451.59)  | -0.30)  |        | 375.31)   | 255.34)   | -1.52)  | 5.72)  | 3.67)   | -1.77)  |         |        |
| (Bolivarian    | (32.78, | (27.35, | (-0.94, | <0.001 | (491.66, | (447.60, | (-0.44, | <0.001 | (370.94,  | (252.34,  | (-2.05, | <0.001 | (5.19,  | (3.32,  | (-2.35, | <0.001 |
| Republic of)   | 35.44)  | 29.36)  | -0.58)  |        | 501.71)  | 455.61)  | -0.16)  |        | 379.72)   | 258.36)   | -0.99)  | 6.29)  | 4.05)   | -1.19)  |         |        |
|                | 35.65)  | 31.88)  | -0.49)  |        | 385.40)  | 406.71)  | 0.26)   |        | 480.24)   | 369.20)   | -0.43)  | 7.15)  | 5.06)   | -0.60)  |         |        |
| Viet Nam       | (34.91, | (31.33, | (-0.70, | <0.001 | (383.01, | (404.77, | (0.09,  | 0.005  | (477.52,  | (367.35,  | (-0.66, | 0.001  | (6.82,  | (4.85,  | (-0.89, | <0.001 |
|                | 36.39)  | 32.43)  | -0.27)  |        | 387.80)  | 408.67)  | 0.44)   |        | 482.97)   | 371.05)   | -0.21)  | 7.50)  | 5.28)   | -0.31)  |         |        |
|                | 48.13)  | 41.16)  | -0.60)  |        | 478.23)  | 454.93)  | -0.11)  |        | 542.96)   | 426.16)   | -0.88)  | 8.39)  | 6.27)   | -1.08)  |         |        |
| Yemen          | (46.03, | (40.03, | (-0.63, | <0.001 | (471.60, | (451.18, | (-0.19, | 0.013  | (535.80,  | (422.51,  | (-1.01, | <0.001 | (7.51,  | (5.84,  | (-1.23, | <0.001 |
|                | 50.31)  | 42.31)  | -0.58)  |        | 484.93)  | 458.71)  | -0.03)  |        | 550.21)   | 429.83)   | -0.74)  | 9.34)  | 6.74)   | -0.93)  |         |        |
|                | 32.25)  | 22.64)  | -1.68)  |        | 464.93)  | 440.70)  | -0.24)  |        | 462.88)   | 398.21)   | -0.90)  | 6.93)  | 5.88)   | -0.99)  |         |        |
| Zambia         | (29.98, | (21.51, | (-1.86, | <0.001 | (456.51, | (435.78, | (-0.34, | <0.001 | (454.31,  | (393.45,  | (-1.09, | <0.001 | (5.90,  | (5.31,  | (-1.21, | <0.001 |
|                | 34.65)  | 23.81)  | -1.50)  |        | 473.48)  | 445.66)  | -0.14)  |        | 471.58)   | 403.01)   | -0.70)  | 8.11)  | 6.50)   | -0.77)  |         |        |
|                | 19.04)  | 27.36)  | 1.22)   |        | 380.77)  | 422.96)  | 0.37)   |        | 216.64)   | 316.41)   | 1.81)   | 2.78)  | 4.39)   | 2.15)   |         |        |
| Zimbabwe       | (17.59, | (26.02, | (0.63,  | <0.001 | (374.28, | (417.69, | (0.23,  | <0.001 | (211.75,  | (311.87,  | (1.16,  | <0.001 | (2.25,  | (3.86,  | (1.33,  | <0.001 |
|                | 20.59)  | 28.75)  | 1.81)   |        | 387.36)  | 428.27)  | 0.50)   |        | 221.63)   | 321.00)   | 2.47)   | 3.42)  | 4.97)   | 2.97)   |         |        |
| <b>Women</b>   |         |         |         |        |          |          |         |        |           |           |         |        |         |         |         |        |
|                | 72.22)  | 73.30)  | -0.41)  |        | 619.28)  | 632.07)  | -0.01)  |        | 1455.91)  | 936.40)   | -1.95)  | 23.87) | 14.82)  | -2.10)  |         |        |
| Afghanistan    | (67.98, | (71.06, | (-0.72, | 0.012  | (607.00, | (625.58, | (-0.13, | 0.798  | (1436.89, | (928.36,  | (-2.30, | <0.001 | (21.47, | (13.81, | (-2.48, | <0.001 |
|                | 76.67)  | 75.60)  | -0.10)  |        | 631.78)  | 638.60)  | 0.10)   |        | ,         | 944.50)   | -1.60)  | 26.50) | 15.89)  | -1.73)  |         |        |
|                | 30.84)  | 27.52)  | -0.39)  |        | 408.09)  | 395.13)  | -0.09)  |        | 379.84)   | 271.76)   | -0.92)  | 5.01)  | 3.22)   | -1.15)  |         |        |
| Albania        | (26.75, | (22.96, | (-0.44, | <0.001 | (392.79, | (377.27, | (-0.18, | 0.028  | (365.20,  | (257.01,  | (-1.14, | <0.001 | (3.45,  | (1.80,  | (-1.47, | <0.001 |
|                | 35.41)  | 32.75)  | -0.34)  |        | 423.86)  | 413.63)  | -0.01)  |        | 394.94)   | 287.16)   | -0.69)  | 7.07)  | 5.34)   | -0.84)  |         |        |
|                | 50.17)  | 36.85)  | -1.26)  |        | 556.26)  | 493.32)  | -0.40)  |        | 661.94)   | 299.91)   | -2.86)  | 9.99)  | 3.86)   | -3.45)  |         |        |
| Algeria        | (48.04, | (35.60, | (-1.34, | <0.001 | (549.19, | (488.70, | (-0.49, | <0.001 | (654.18,  | (296.32,  | (-3.00, | <0.001 | (9.04,  | (3.47,  | (-3.60, | <0.001 |
|                | 52.38)  | 38.13)  | -1.18)  |        | 563.41)  | 497.97)  | -0.31)  |        | 669.77)   | 303.54)   | -2.72)  | 11.01) | 4.29)   | -3.30)  |         |        |
|                | 50.26)  | 58.69)  | 0.64)   |        | 629.51)  | 670.29)  | 0.28)   |        | 463.62)   | 524.88)   | 0.13)   | 5.79)  | 6.70)   | 0.03)   |         |        |
| American Samoa | (15.51, | (20.34, | (0.57,  | <0.001 | (477.68, | (514.23, | (0.22,  | <0.001 | (334.57,  | (387.92,  | (-0.08, | 0.222) | (0.01,  | (0.02,  | (-0.26, | 0.817) |

|                     |         |         |         |        |          |          |         |        |          |          |         |        |        |        |         |        |
|---------------------|---------|---------|---------|--------|----------|----------|---------|--------|----------|----------|---------|--------|--------|--------|---------|--------|
|                     | 125.07) | 135.39) | 0.72)   |        | 816.93)  | 860.87)  | 0.33)   |        | 628.67)  | 696.61)  | 0.34)   |        | 58.21) | 57.84) | 0.33)   |        |
|                     | 17.94   | 16.43   | -0.46   |        | 274.77   | 272.61   | -0.12   |        | 114.74   | 80.38    | -1.45   |        | 1.24   | 0.66   | -2.55   |        |
| Andorra             | (2.38,  | (2.19,  | (-0.56, | <0.001 | (188.75, | (190.32, | (-0.23, | 0.018  | (62.17,  | (39.31,  | (-1.60, | <0.001 | (0.00, | (0.00, | (-2.76, | <0.001 |
|                     | 70.72)  | 65.03)  | -0.35)  |        | 391.10)  | 382.74)  | -0.02)  |        | 199.12)  | 151.31)  | -1.31)  |        | 44.80) | 40.63) | -2.34)  |        |
|                     | 40.49   | 24.93   | -2.02   |        | 541.90   | 481.84   | -0.44   |        | 465.87   | 271.25   | -2.11   |        | 6.83   | 3.55   | -2.51   |        |
| Angola              | (37.55, | (23.59, | (-2.18, | <0.001 | (531.16, | (476.01, | (-0.50, | <0.001 | (455.80, | (266.80, | (-2.35, | <0.001 | (5.64, | (3.06, | (-2.83, | <0.001 |
|                     | 43.61)  | 26.32)  | -1.85)  |        | 552.81)  | 487.73)  | -0.37)  |        | 476.12)  | 275.75)  | -1.86)  |        | 8.19)  | 4.11)  | -2.20)  |        |
| Antigua and Barbuda | 38.48   | 35.96   | -0.31   |        | 491.55   | 486.82   | 0.01    |        | 293.34   | 151.94   | -2.45   |        | 4.27   | 1.81   | -3.32   |        |
|                     | (12.38, | (13.86, | (-0.48, | <0.001 | (378.18, | (390.41, | (-0.07, | 0.755  | (207.32, | (100.55, | (-2.70, | <0.001 | (0.01, | (0.00, | (-3.61, | <0.001 |
|                     | 91.61)  | 77.94)  | -0.15)  |        | 629.17)  | 601.07)  | 0.10)   |        | 404.02)  | 221.77)  | -2.19)  |        | 39.28) | 27.35) | -3.03)  |        |
|                     | 34.23   | 23.02   | -1.64   |        | 350.84   | 290.67   | -0.72   |        | 512.09   | 205.54   | -3.44   |        | 7.88   | 2.67   | -4.16   |        |
| Argentina           | (32.77, | (22.04, | (-1.81, | <0.001 | (346.14, | (287.15, | (-0.80, | <0.001 | (506.42, | (202.57, | (-3.86, | <0.001 | (7.19, | (2.34, | (-4.62, | <0.001 |
|                     | 35.73)  | 24.04)  | -1.46)  |        | 355.58)  | 294.22)  | -0.63)  |        | 517.81)  | 208.54)  | -3.03)  |        | 8.62)  | 3.03)  | -3.69)  |        |
|                     | 34.72   | 29.96   | -0.58   |        | 448.68   | 406.67   | -0.30   |        | 206.90   | 121.36   | -2.12   |        | 2.01   | 0.67   | -4.02   |        |
| Armenia             | (30.58, | (25.66, | (-0.76, | <0.001 | (433.45, | (390.52, | (-0.37, | <0.001 | (196.56, | (112.58, | (-2.27, | <0.001 | (1.11, | (0.18, | (-4.43, | <0.001 |
|                     | 39.29)  | 34.90)  | -0.41)  |        | 464.33)  | 423.44)  | -0.22)  |        | 217.67)  | 130.77)  | -1.98)  |        | 3.37)  | 1.97)  | -3.61)  |        |
|                     | 20.67   | 19.03   | -0.56   |        | 329.60   | 310.40   | -0.09   |        | 141.76   | 87.71    | -1.76   |        | 1.51   | 0.63   | -3.15   |        |
| Australia           | (19.18, | (17.75, | (-0.68, | <0.001 | (323.57, | (305.16, | (-0.19, | 0.065  | (137.82, | (84.95,  | (-1.88, | <0.001 | (1.13, | (0.42, | (-3.41, | <0.001 |
|                     | 22.25)  | 20.39)  | -0.43)  |        | 335.72)  | 315.71)  | 0.01)   |        | 145.79)  | 90.54)   | -1.63)  |        | 1.99)  | 0.92)  | -2.90)  |        |
|                     | 24.79   | 19.67   | -1.04   |        | 366.71   | 329.99   | -0.42   |        | 185.41   | 78.80    | -3.47   |        | 2.30   | 0.52   | -5.81   |        |
| Austria             | (22.31, | (17.44, | (-1.14, | <0.001 | (357.00, | (320.61, | (-0.53, | <0.001 | (178.54, | (74.26,  | (-3.68, | <0.001 | (1.59, | (0.22, | (-6.16, | <0.001 |
|                     | 27.49)  | 22.15)  | -0.94)  |        | 376.63)  | 339.61)  | -0.32)  |        | 192.50)  | 83.57)   | -3.25)  |        | 3.24)  | 1.10)  | -5.47)  |        |
|                     | 37.84   | 30.34   | -0.67   |        | 447.54   | 421.29   | -0.11   |        | 322.66   | 209.13   | -1.67   |        | 4.05   | 2.15   | -2.34   |        |
| Azerbaijan          | (34.81, | (28.06, | (-0.76, | <0.001 | (436.97, | (412.71, | (-0.19, | 0.012  | (313.66, | (203.08, | (-2.00, | <0.001 | (3.09, | (1.58, | (-2.81, | <0.001 |
|                     | 41.08)  | 32.77)  | -0.58)  |        | 458.32)  | 430.02)  | -0.03)  |        | 331.86)  | 215.33)  | -1.34)  |        | 5.22)  | 2.89)  | -1.86)  |        |
|                     | 39.30   | 34.82   | -0.45   |        | 508.07   | 470.78   | -0.18   |        | 349.37   | 248.51   | -1.71   |        | 5.27   | 3.56   | -2.04   |        |
| Bahamas             | (24.65, | (22.97, | (-0.59, | <0.001 | (451.15, | (423.79, | (-0.30, | 0.006  | (302.09, | (214.82, | (-2.02, | <0.001 | (1.05, | (0.68, | (-2.41, | <0.001 |
|                     | 59.86)  | 50.82)  | -0.31)  |        | 570.49)  | 521.71)  | -0.06)  |        | 402.25)  | 286.16)  | -1.39)  |        | 16.17) | 11.10) | -1.67)  |        |
|                     | 35.92   | 34.08   | -0.38   |        | 550.66   | 510.97   | -0.25   |        | 384.36   | 178.82   | -2.47   |        | 4.86   | 1.66   | -3.67   |        |
| Bahrain             | (24.95, | (27.18, | (-0.57, | <0.001 | (504.81, | (483.06, | (-0.32, | <0.001 | (345.86, | (162.28, | (-2.95, | <0.001 | (1.47, | (0.46, | (-4.41, | <0.001 |
|                     | 50.39)  | 42.37)  | -0.20)  |        | 599.79)  | 540.23)  | -0.17)  |        | 426.20)  | 196.72)  | -1.98)  |        | 12.19) | 4.53)  | -2.92)  |        |
|                     | 26.46   | 28.79   | 0.27    |        | 459.63   | 469.92   | 0.45    |        | 621.72   | 300.33   | -2.15   |        | 9.53   | 3.91   | -2.71   |        |
| Bangladesh          | (25.70, | (28.23, | (0.21,  | <0.001 | (456.53, | (467.63, | (0.07,  | 0.020  | (618.07, | (298.50, | (-2.42, | <0.001 | (9.07, | (3.70, | (-2.99, | <0.001 |

|                |         |         |         |        |          |          |         |        |          |          |         |        |         |        |         |        |
|----------------|---------|---------|---------|--------|----------|----------|---------|--------|----------|----------|---------|--------|---------|--------|---------|--------|
|                | 27.23)  | 29.37)  | 0.34)   |        | 462.75)  | 472.21)  | 0.82)   |        | 625.39)  | 302.17)  | -1.88)  |        | 10.00)  | 4.12)  | -2.42)  |        |
|                | 37.27)  | 36.82)  | -0.02)  |        | 511.85)  | 507.59)  | 0.10)   |        | 249.79)  | 177.34)  | -1.79)  |        | 3.45)   | 2.22)  | -2.32)  |        |
| Barbados       | (23.01, | (22.21, | (-0.21, | 0.794  | (454.22, | (448.08, | (-0.03, | 0.109  | (209.99, | (143.05, | (-2.05, | <0.001 | (0.39,  | (0.09, | (-2.66, | <0.001 |
|                | 57.34)  | 57.91)  | 0.16)   |        | 574.96)  | 573.16)  | 0.23)   |        | 295.14)  | 217.79)  | -1.52)  |        | 13.17)  | 12.09) | -1.99)  |        |
|                | 34.74)  | 33.59)  | 0.06)   |        | 460.26)  | 470.22)  | 0.17)   |        | 218.90)  | 190.85)  | -0.36)  |        | 2.20)   | 1.73)  | -0.54)  |        |
| Belarus        | (32.23, | (30.79, | (-0.06, | 0.312  | (451.01, | (459.55, | (0.12,  | <0.001 | (212.52, | (184.23, | (-0.80, | 0.114  | (1.61,  | (1.18, | (-1.31, | 0.160  |
|                | 37.40)  | 36.61)  | 0.18)   |        | 469.67)  | 481.12)  | 0.21)   |        | 225.44)  | 197.68)  | 0.09)   |        | 2.96)   | 2.52)  | 0.23)   |        |
|                | 21.08)  | 16.12)  | -1.20)  |        | 298.15)  | 298.80)  | 0.10)   |        | 233.20)  | 97.69)   | -3.08)  |        | 3.24)   | 0.90)  | -4.58)  |        |
| Belgium        | (19.06, | (14.32, | (-1.31, | <0.001 | (290.40, | (290.87, | (-0.05, | 0.175  | (226.35, | (93.20,  | (-3.31, | <0.001 | (2.48,  | (0.53, | (-4.80, | <0.001 |
|                | 23.27)  | 18.09)  | -1.09)  |        | 306.06)  | 306.90)  | 0.24)   |        | 240.22)  | 102.37)  | -2.86)  |        | 4.17)   | 1.48)  | -4.35)  |        |
|                | 33.55)  | 36.04)  | 0.33)   |        | 462.85)  | 489.54)  | 0.29)   |        | 205.38)  | 192.46)  | -1.41)  |        | 2.76)   | 2.49)  | -2.03)  |        |
| Belize         | (16.27, | (24.52, | (0.21,  | <0.001 | (390.06, | (444.05, | (0.23,  | <0.001 | (157.78, | (164.28, | (-1.85, | <0.001 | (0.03,  | (0.33, | (-2.58, | <0.001 |
|                | 62.75)  | 51.23)  | 0.45)   |        | 546.33)  | 538.52)  | 0.36)   |        | 263.93)  | 224.18)  | -0.97)  |        | 19.96)  | 8.89)  | -1.48)  |        |
|                | 32.66)  | 29.96)  | -0.34)  |        | 473.01)  | 458.26)  | -0.04)  |        | 310.36)  | 281.56)  | -0.40)  |        | 4.29)   | 3.78)  | -0.53)  |        |
| Benin          | (28.89, | (27.72, | (-0.40, | <0.001 | (458.57, | (449.53, | (-0.13, | 0.320  | (298.45, | (274.62, | (-0.49, | <0.001 | (2.98,  | (3.00, | (-0.63, | <0.001 |
|                | 36.82)  | 32.35)  | -0.29)  |        | 487.83)  | 467.13)  | 0.04)   |        | 322.65)  | 288.64)  | -0.31)  |        | 6.01)   | 4.70)  | -0.42)  |        |
|                | 36.57)  | 37.94)  | 0.12)   |        | 484.08)  | 456.10)  | -0.24)  |        | 157.47)  | 76.23)   | -2.98)  |        | 1.89)   | 0.54)  | -5.40)  |        |
| Bermuda        | (11.80, | (9.70,  | (-0.04, | 0.143  | (373.99, | (331.86, | (-0.29, | <0.001 | (97.85,  | (31.67,  | (-3.25, | <0.001 | (0.00,  | (0.00, | (-5.76, | <0.001 |
|                | 93.74)  | 109.48) | 0.28)   |        | 621.38)  | 617.04)  | -0.18)  |        | 245.86)  | 161.59)  | -2.71)  |        | 43.98)  | 53.48) | -5.05)  |        |
|                | 31.49)  | 21.12)  | -1.73)  |        | 379.61)  | 339.42)  | -0.37)  |        | 279.17)  | 147.88)  | -2.66)  |        | 3.85)   | 1.62)  | -3.58)  |        |
| Bhutan         | (21.43, | (14.67, | (-1.91, | <0.001 | (342.84, | (311.82, | (-0.52, | <0.001 | (247.24, | (129.82, | (-2.87, | <0.001 | (0.98,  | (0.29, | (-3.83, | <0.001 |
|                | 44.91)  | 29.48)  | -1.54)  |        | 419.49)  | 368.84)  | -0.22)  |        | 314.31)  | 167.79)  | -2.45)  |        | 10.55)  | 5.11)  | -3.33)  |        |
|                | 60.58)  | 35.92)  | -2.10)  |        | 586.52)  | 466.25)  | -0.83)  |        | 778.84)  | 343.37)  | -3.08)  |        | 12.29)  | 5.08)  | -3.31)  |        |
| Bolivia        | (56.19, | (33.54, | (-2.28, | <0.001 | (572.61, | (457.57, | (-0.95, | <0.001 | (762.98, | (335.93, | (-3.22, | <0.001 | (10.36, | (4.21, | (-3.46, | <0.001 |
| (Plurinational | 65.24)  | 38.42)  | -1.92)  |        | 600.69)  | 475.06)  | -0.71)  |        | 794.97)  | 350.93)  | -2.95)  |        | 14.50)  | 6.08)  | -3.17)  |        |
| State of)      | 34.29)  | 36.88)  | 0.46)   |        | 474.18)  | 500.89)  | 0.29)   |        | 253.53)  | 222.14)  | -0.91)  |        | 2.72)   | 2.08)  | -1.71)  |        |
| Bosnia and     | (30.65, | (31.93, | (0.37,  | <0.001 | (460.37, | (482.16, | (0.21,  | <0.001 | (243.45, | (209.69, | (-1.10, | <0.001 | (1.77,  | (1.05, | (-2.04, | <0.001 |
| Herzegovina    | 38.25)  | 42.45)  | 0.54)   |        | 488.32)  | 520.21)  | 0.37)   |        | 263.92)  | 235.19)  | -0.73)  |        | 4.01)   | 3.79)  | -1.37)  |        |
|                | 23.47)  | 24.03)  | 0.24)   |        | 521.32)  | 523.54)  | 0.15)   |        | 319.33)  | 260.83)  | -0.37)  |        | 4.34)   | 3.28)  | -0.56)  |        |
| Botswana       | (17.70, | (20.08, | (0.12,  | <0.001 | (493.31, | (504.36, | (0.05,  | 0.005  | (296.85, | (247.39, | (-0.59, | 0.002  | (2.06,  | (1.94, | (-0.85, | <0.001 |
|                | 30.63)  | 28.55)  | 0.37)   |        | 550.62)  | 543.28)  | 0.25)   |        | 343.15)  | 274.82)  | -0.15)  |        | 8.15)   | 5.23)  | -0.27)  |        |
|                | 57.05)  | 33.04)  | -2.40)  |        | 654.50)  | 522.29)  | -0.98)  |        | 619.79)  | 238.47)  | -3.57)  |        | 9.88)   | 3.29)  | -4.08)  |        |
| Brazil         | (56.19, | (32.52, | (-2.72, | <0.001 | (651.61, | (520.18, | (-1.20, | <0.001 | (616.96, | (237.05, | (-3.80, | <0.001 | (9.53,  | (3.13, | (-4.29, | <0.001 |



|                          |         |         |         |        |          |          |         |        |          |          |         |        |        |        |         |        |
|--------------------------|---------|---------|---------|--------|----------|----------|---------|--------|----------|----------|---------|--------|--------|--------|---------|--------|
|                          | 57.91)  | 33.58)  | -2.08)  |        | 657.40)  | 524.41)  | -0.76)  |        | 622.64)  | 239.90)  | -3.35)  |        | 10.25) | 3.46)  | -3.86)  |        |
|                          | 34.34   | 21.17   | -2.03   |        | 415.13   | 368.19   | -0.36   |        | 377.67   | 156.15   | -3.32   |        | 5.37   | 1.56   | -4.86   |        |
| Brunei Darussalam        | (20.64, | (13.04, | (-2.28, | <0.001 | (363.41, | (330.85, | (-0.57, | 0.001  | (328.08, | (132.27, | (-3.68, | <0.001 | (1.08, | (0.12, | (-5.26, | <0.001 |
|                          | 53.98)  | 32.89)  | -1.78)  |        | 472.39)  | 408.88)  | -0.16)  |        | 432.86)  | 183.40)  | -2.96)  |        | 16.27) | 7.31)  | -4.45)  |        |
|                          | 37.40   | 32.59   | -0.51   |        | 540.12   | 510.56   | -0.14   |        | 445.20   | 318.28   | -1.82   |        | 5.84   | 3.75   | -2.38   |        |
| Bulgaria                 | (34.39, | (29.18, | (-0.54, | <0.001 | (528.50, | (496.70, | (-0.26, | 0.016  | (434.67, | (307.38, | (-2.13, | <0.001 | (4.70, | (2.67, | (-2.82, | <0.001 |
|                          | 40.60)  | 36.33)  | -0.48)  |        | 551.94)  | 524.77)  | -0.03)  |        | 455.92)  | 329.50)  | -1.52)  |        | 7.19)  | 5.19)  | -1.95)  |        |
|                          | 25.92   | 23.39   | -0.37   |        | 426.23   | 406.72   | -0.11   |        | 315.95   | 273.31   | -0.43   |        | 4.53   | 3.78   | -0.54   |        |
| Burkina Faso             | (23.44, | (21.93, | (-0.50, | <0.001 | (416.18, | (400.65, | (-0.18, | 0.001  | (307.07, | (268.24, | (-0.57, | <0.001 | (3.51, | (3.20, | (-0.71, | <0.001 |
|                          | 28.60)  | 24.93)  | -0.24)  |        | 436.47)  | 412.87)  | -0.05)  |        | 325.04)  | 278.46)  | -0.29)  |        | 5.77)  | 4.45)  | -0.38)  |        |
|                          | 53.63   | 24.84   | -3.30   |        | 704.87   | 589.42   | -0.71   |        | 719.85   | 362.92   | -2.89   |        | 11.01  | 4.95   | -3.37   |        |
| Burundi                  | (49.04, | (22.75, | (-3.56, | <0.001 | (688.43, | (579.34, | (-0.82, | <0.001 | (702.82, | (354.80, | (-3.12, | <0.001 | (8.97, | (4.03, | (-3.64, | <0.001 |
|                          | 58.54)  | 27.08)  | -3.04)  |        | 721.63)  | 599.65)  | -0.59)  |        | 737.21)  | 371.19)  | -2.66)  |        | 13.40) | 6.03)  | -3.11)  |        |
|                          | 32.92   | 27.18   | -0.77   |        | 508.67   | 485.31   | -0.13   |        | 374.95   | 187.26   | -2.36   |        | 5.31   | 2.06   | -3.06   |        |
| Cabo Verde               | (19.76, | (18.62, | (-0.83, | <0.001 | (453.22, | (446.52, | (-0.15, | <0.001 | (326.41, | (163.41, | (-2.63, | <0.001 | (1.07, | (0.33, | (-3.44, | <0.001 |
|                          | 52.31)  | 38.42)  | -0.71)  |        | 569.69)  | 526.64)  | -0.10)  |        | 429.24)  | 213.69)  | -2.10)  |        | 16.71) | 6.84)  | -2.68)  |        |
|                          | 39.52   | 27.65   | -1.57   |        | 418.45   | 393.90   | -0.27   |        | 606.69   | 325.79   | -2.46   |        | 9.16   | 4.28   | -2.96   |        |
| Cambodia                 | (36.72, | (25.94, | (-1.69, | <0.001 | (409.31, | (387.38, | (-0.40, | <0.001 | (595.52, | (319.84, | (-2.62, | <0.001 | (7.83, | (3.62, | (-3.15, | <0.001 |
|                          | 42.48)  | 29.45)  | -1.45)  |        | 427.75)  | 400.52)  | -0.14)  |        | 618.02)  | 331.83)  | -2.30)  |        | 10.67) | 5.02)  | -2.77)  |        |
|                          | 30.50   | 28.96   | -0.42   |        | 459.46   | 460.34   | -0.01   |        | 419.19   | 352.21   | -0.82   |        | 6.24   | 5.02   | -1.00   |        |
| Cameroon                 | (27.95, | (27.56, | (-0.70, | 0.005  | (449.58, | (454.80, | (-0.11, | 0.904  | (409.51, | (347.29, | (-1.11, | <0.001 | (5.09, | (4.44, | (-1.34, | <0.001 |
|                          | 33.25)  | 30.42)  | -0.14)  |        | 469.51)  | 465.94)  | 0.10)   |        | 429.04)  | 357.19)  | -0.52)  |        | 7.58)  | 5.66)  | -0.66)  |        |
|                          | 18.16   | 15.68   | -0.48   |        | 348.33   | 309.55   | -0.25   |        | 159.24   | 94.28    | -1.90   |        | 1.77   | 0.73   | -3.33   |        |
| Canada                   | (17.08, | (14.69, | (-0.64, | <0.001 | (343.52, | (305.09, | (-0.46, | 0.017  | (156.01, | (91.84,  | (-2.14, | <0.001 | (1.45, | (0.54, | (-3.64, | <0.001 |
|                          | 19.30)  | 16.73)  | -0.32)  |        | 353.20)  | 314.06)  | -0.05)  |        | 162.52)  | 96.78)   | -1.67)  |        | 2.15)  | 0.99)  | -3.02)  |        |
|                          | 37.02   | 38.86   | 0.10    |        | 512.93   | 510.23   | 0.01    |        | 490.12   | 443.50   | -0.27   |        | 7.38   | 6.56   | -0.33   |        |
| Central African Republic | (31.68, | (35.01, | (0.03,  | 0.005  | (492.96, | (496.32, | (-0.06, | 0.718  | (470.07, | (430.28, | (-0.36, | <0.001 | (5.08, | (5.02, | (-0.44, | <0.001 |
|                          | 43.07)  | 43.03)  | 0.16)   |        | 533.56)  | 524.44)  | 0.08)   |        | 510.84)  | 457.03)  | -0.18)  |        | 10.43) | 8.43)  | -0.23)  |        |
|                          | 31.97   | 31.92   | -0.01   |        | 470.03   | 477.01   | 0.18    |        | 416.32   | 368.85   | -0.34   |        | 6.16   | 5.28   | -0.46   |        |
| Chad                     | (28.54, | (29.75, | (-0.08, | 0.896  | (456.83, | (468.73, | (0.10,  | <0.001 | (403.68, | (361.41, | (-0.50, | <0.001 | (4.69, | (4.41, | (-0.64, | <0.001 |
|                          | 35.71)  | 34.21)  | 0.07)   |        | 483.53)  | 485.41)  | 0.26)   |        | 429.27)  | 376.40)  | -0.19)  |        | 7.95)  | 6.28)  | -0.28)  |        |
|                          | 28.13   | 24.56   | -0.22   |        | 374.05   | 341.28   | -0.09   |        | 249.59   | 144.65   | -1.62   |        | 3.27   | 1.54   | -2.27   |        |
| Chile                    | (26.20, | (22.93, | (-0.49, | 0.091  | (366.93, | (335.17, | (-0.28, | 0.296  | (243.77, | (140.67, | (-1.76, | <0.001 | (2.64, | (1.16, | (-2.41, | <0.001 |

|               |         |         |         |        |          |          |         |        |          |          |         |        |         |         |         |        |
|---------------|---------|---------|---------|--------|----------|----------|---------|--------|----------|----------|---------|--------|---------|---------|---------|--------|
|               | 30.17)  | 26.28)  | 0.04)   |        | 381.28)  | 347.49)  | 0.09)   |        | 255.52)  | 148.72)  | -1.48)  |        | 4.03)   | 2.02)   | -2.12)  |        |
|               | 28.09)  | 20.08)  | -1.87)  |        | 408.71)  | 365.55)  | -0.66)  |        | 411.92)  | 204.45)  | -3.01)  |        | 5.62)   | 2.08)   | -3.96)  |        |
| China         | (27.89, | (19.90, | (-2.13, | <0.001 | (407.92, | (364.80, | (-0.94, | <0.001 | (411.13, | (203.89, | (-3.48, | <0.001 | (5.53,  | (2.02,  | (-4.59, | <0.001 |
|               | 28.30)  | 20.26)  | -1.61)  |        | 409.50)  | 366.31)  | -0.38)  |        | 412.71)  | 205.02)  | -2.53)  |        | 5.72)   | 2.13)   | -3.33)  |        |
|               | 42.11)  | 28.77)  | -1.61)  |        | 548.95)  | 461.14)  | -0.59)  |        | 368.98)  | 166.00)  | -2.95)  |        | 5.47)   | 2.06)   | -3.64)  |        |
| Colombia      | (40.56, | (27.71, | (-1.87, | <0.001 | (543.38, | (456.86, | (-0.72, | <0.001 | (364.39, | (163.44, | (-3.34, | <0.001 | (4.92,  | (1.79,  | (-4.09, | <0.001 |
|               | 43.70)  | 29.86)  | -1.36)  |        | 554.58)  | 465.44)  | -0.46)  |        | 373.62)  | 168.59)  | -2.56)  |        | 6.07)   | 2.37)   | -3.19)  |        |
|               | 52.98)  | 29.90)  | -2.32)  |        | 796.17)  | 624.65)  | -1.05)  |        | 515.91)  | 333.08)  | -2.01)  |        | 7.17)   | 4.33)   | -2.26)  |        |
| Comoros       | (37.54, | (21.47, | (-2.46, | <0.001 | (734.80, | (584.19, | (-1.18, | <0.001 | (465.35, | (303.34, | (-2.59, | <0.001 | (2.36,  | (1.57,  | (-2.95, | <0.001 |
|               | 72.97)  | 40.64)  | -2.17)  |        | 861.66)  | 667.27)  | -0.92)  |        | 570.76)  | 365.01)  | -1.44)  |        | 17.04)  | 9.60)   | -1.57)  |        |
|               | 54.67)  | 31.90)  | -2.30)  |        | 649.01)  | 541.26)  | -0.70)  |        | 550.73)  | 342.87)  | -1.96)  |        | 8.16)   | 4.74)   | -2.23)  |        |
| Congo         | (47.67, | (28.59, | (-2.51, | <0.001 | (624.93, | (527.41, | (-0.77, | <0.001 | (528.08, | (331.82, | (-2.30, | <0.001 | (5.58,  | (3.52,  | (-2.64, | <0.001 |
|               | 62.45)  | 35.49)  | -2.10)  |        | 673.83)  | 555.40)  | -0.63)  |        | 574.15)  | 354.21)  | -1.61)  |        | 11.56)  | 6.25)   | -1.82)  |        |
|               | 48.55)  | 49.17)  | -0.04)  |        | 603.45)  | 604.76)  | 0.02)   |        | 565.65)  | 337.25)  | -1.83)  |        | 7.60)   | 3.64)   | -2.71)  |        |
| Cook Islands  | (4.38,  | (3.63,  | (-0.23, | 0.667  | (372.28, | (362.21, | (-0.07, | 0.681  | (343.01, | (164.55, | (-2.09, | <0.001 | (0.00,  | (0.00,  | (-3.02, | <0.001 |
|               | 203.83) | 211.81) | 0.15)   |        | 930.34)  | 949.91)  | 0.10)   |        | 884.16)  | 614.93)  | -1.57)  |        | 135.25) | 131.18) | -2.39)  |        |
|               | 33.80)  | 30.38)  | -0.42)  |        | 508.07)  | 482.78)  | -0.16)  |        | 221.26)  | 131.85)  | -1.99)  |        | 2.98)   | 1.46)   | -2.74)  |        |
| Costa Rica    | (29.36, | (27.07, | (-0.58, | <0.001 | (490.45, | (469.30, | (-0.23, | <0.001 | (209.59, | (124.86, | (-2.37, | <0.001 | (1.76,  | (0.82,  | (-3.28, | <0.001 |
|               | 38.75)  | 34.02)  | -0.27)  |        | 526.19)  | 496.57)  | -0.09)  |        | 233.44)  | 139.16)  | -1.61)  |        | 4.75)   | 2.45)   | -2.21)  |        |
|               | 35.87)  | 33.02)  | -0.49)  |        | 530.59)  | 514.60)  | -0.11)  |        | 411.82)  | 328.48)  | -0.52)  |        | 5.90)   | 4.46)   | -0.64)  |        |
| Cote d'Ivoire | (33.26, | (31.45, | (-0.67, | <0.001 | (520.68, | (508.41, | (-0.18, | 0.005  | (402.92, | (323.50, | (-0.73, | <0.001 | (4.86,  | (3.89,  | (-0.89, | <0.001 |
|               | 38.65)  | 34.66)  | -0.31)  |        | 540.65)  | 520.86)  | -0.04)  |        | 420.89)  | 333.53)  | -0.31)  |        | 7.11)   | 5.09)   | -0.39)  |        |
|               | 29.19)  | 23.88)  | -0.91)  |        | 436.03)  | 379.98)  | -0.55)  |        | 274.45)  | 135.37)  | -2.64)  |        | 3.25)   | 0.98)   | -4.17)  |        |
| Croatia       | (25.82, | (20.31, | (-1.06, | <0.001 | (422.70, | (365.32, | (-0.67, | <0.001 | (263.93, | (126.69, | (-2.78, | <0.001 | (2.20,  | (0.39,  | (-4.46, | <0.001 |
|               | 32.90)  | 27.97)  | -0.76)  |        | 449.69)  | 395.15)  | -0.42)  |        | 285.31)  | 144.56)  | -2.50)  |        | 4.65)   | 2.17)   | -3.87)  |        |
|               | 39.73)  | 33.80)  | -0.71)  |        | 505.73)  | 455.56)  | -0.36)  |        | 294.64)  | 138.01)  | -3.12)  |        | 4.32)   | 1.63)   | -4.05)  |        |
| Cuba          | (37.14, | (31.17, | (-0.88, | <0.001 | (496.44, | (445.75, | (-0.49, | <0.001 | (287.47, | (132.65, | (-3.46, | <0.001 | (3.48,  | (1.10,  | (-4.47, | <0.001 |
|               | 42.46)  | 36.60)  | -0.53)  |        | 515.15)  | 465.53)  | -0.23)  |        | 301.94)  | 143.55)  | -2.77)  |        | 5.30)   | 2.35)   | -3.63)  |        |
|               | 19.19)  | 16.43)  | -0.95)  |        | 293.27)  | 316.38)  | 0.29)   |        | 151.87)  | 76.94)   | -3.12)  |        | 1.86)   | 0.50)   | -4.90)  |        |
| Cyprus        | (12.86, | (11.84, | (-1.10, | <0.001 | (266.65, | (294.79, | (0.16,  | <0.001 | (132.85, | (66.48,  | (-3.53, | <0.001 | (0.36,  | (0.03,  | (-5.74, | <0.001 |
|               | 27.67)  | 22.65)  | -0.79)  |        | 321.92)  | 339.45)  | 0.43)   |        | 172.95)  | 88.94)   | -2.72)  |        | 5.80)   | 3.24)   | -4.05)  |        |
|               | 33.20)  | 29.32)  | -0.57)  |        | 473.14)  | 433.14)  | -0.36)  |        | 259.24)  | 126.35)  | -2.92)  |        | 2.85)   | 0.67)   | -5.59)  |        |
| Czechia       | (30.64, | (26.69, | (-0.76, | <0.001 | (463.33, | (422.90, | (-0.46, | <0.001 | (252.00, | (120.82, | (-3.11, | <0.001 | (2.14,  | (0.33,  | (-5.85, | <0.001 |

|                   |         |         |         |        |          |          |         |        |          |          |         |        |         |        |         |        |
|-------------------|---------|---------|---------|--------|----------|----------|---------|--------|----------|----------|---------|--------|---------|--------|---------|--------|
|                   | 35.93)  | 32.17)  | -0.37)  |        | 483.12)  | 443.61)  | -0.26)  |        | 266.64)  | 132.10)  | -2.73)  |        | 3.73)   | 1.26)  | -5.32)  |        |
| Democratic        | 35.54   | 34.75   | -0.12   |        | 408.27   | 424.30   | 0.21    |        | 503.58   | 439.90   | -0.48   |        | 7.25    | 6.06   | -0.65   |        |
| People's Republic | (33.71, | (33.11, | (-0.24, | 0.046  | (402.05, | (418.51, | (0.13,  | <0.001 | (496.60, | (434.01, | (-0.66, | <0.001 | (6.43,  | (5.39, | (-0.88, | <0.001 |
| of Korea          | 37.46)  | 36.46)  | -0.00)  |        | 414.57)  | 430.15)  | 0.30)   |        | 510.65)  | 445.84)  | -0.30)  |        | 8.16)   | 6.80)  | -0.42)  |        |
| Democratic        | 30.93   | 23.63   | -1.15   |        | 468.22   | 422.11   | -0.34   |        | 407.71   | 276.80   | -1.43   |        | 5.98    | 3.80   | -1.66   |        |
| Republic of the   | (29.57, | (22.87, | (-1.24, | <0.001 | (462.99, | (418.92, | (-0.44, | <0.001 | (402.75, | (274.16, | (-1.56, | <0.001 | (5.39,  | (3.49, | (-1.83, | <0.001 |
| Congo             | 32.34)  | 24.42)  | -1.05)  |        | 473.49)  | 425.33)  | -0.25)  |        | 412.72)  | 279.46)  | -1.30)  |        | 6.63)   | 4.13)  | -1.49)  |        |
|                   | 24.22   | 16.12   | -1.64   |        | 362.71   | 313.35   | -0.58   |        | 195.24   | 80.90    | -3.69   |        | 2.52    | 0.60   | -5.80   |        |
| Denmark           | (21.20, | (13.59, | (-1.76, | <0.001 | (350.68, | (301.83, | (-0.68, | <0.001 | (186.50, | (75.12,  | (-3.94, | <0.001 | (1.62,  | (0.21, | (-6.25, | <0.001 |
|                   | 27.58)  | 19.00)  | -1.51)  |        | 375.05)  | 325.21)  | -0.48)  |        | 204.30)  | 87.04)   | -3.45)  |        | 3.76)   | 1.40)  | -5.35)  |        |
|                   | 30.68   | 23.58   | -1.07   |        | 609.93   | 611.15   | 0.09    |        | 356.82   | 247.45   | -1.41   |        | 4.82    | 2.89   | -1.99   |        |
| Djibouti          | (19.49, | (17.96, | (-1.21, | <0.001 | (557.31, | (580.59, | (-0.01, | 0.082  | (315.60, | (228.39, | (-1.55, | <0.001 | (1.17,  | (1.20, | (-2.17, | <0.001 |
|                   | 46.25)  | 30.51)  | -0.94)  |        | 666.49)  | 642.98)  | 0.20)   |        | 402.17)  | 267.75)  | -1.27)  |        | 13.39)  | 6.00)  | -1.82)  |        |
|                   | 38.43   | 34.91   | -0.45   |        | 500.89   | 494.06   | -0.02   |        | 281.75   | 196.43   | -2.17   |        | 4.05    | 2.57   | -2.80   |        |
| Dominica          | (11.92, | (10.28, | (-0.55, | <0.001 | (384.25, | (378.93, | (-0.12, | 0.685  | (195.71, | (126.78, | (-2.52, | <0.001 | (0.00,  | (0.00, | (-3.27, | <0.001 |
|                   | 94.54)  | 86.25)  | -0.34)  |        | 643.59)  | 633.39)  | 0.08)   |        | 394.52)  | 290.86)  | -1.82)  |        | 42.29)  | 35.08) | -2.32)  |        |
| Dominican         | 39.64   | 43.21   | 0.34    |        | 458.86   | 483.21   | 0.28    |        | 412.50   | 395.75   | 0.07    |        | 6.39    | 6.11   | 0.08    |        |
| Republic          | (36.39, | (40.48, | (0.28,  | <0.001 | (447.74, | (474.03, | (0.21,  | <0.001 | (401.90, | (387.42, | (-0.20, | 0.609  | (5.12,  | (5.11, | (-0.22, | 0.591  |
|                   | 43.12)  | 46.07)  | 0.40)   |        | 470.21)  | 492.53)  | 0.34)   |        | 423.31)  | 404.22)  | 0.33)   |        | 7.89)   | 7.25)  | 0.38)   |        |
|                   | 46.63   | 34.94   | -1.17   |        | 540.86   | 490.80   | -0.37   |        | 502.41   | 271.31   | -2.47   |        | 7.69    | 3.78   | -2.81   |        |
| Ecuador           | (43.62, | (33.02, | (-1.28, | <0.001 | (530.44, | (483.53, | (-0.42, | <0.001 | (492.44, | (265.91, | (-2.74, | <0.001 | (6.49,  | (3.17, | (-3.12, | <0.001 |
|                   | 49.81)  | 36.95)  | -1.06)  |        | 551.44)  | 498.17)  | -0.31)  |        | 512.54)  | 276.78)  | -2.19)  |        | 9.05)   | 4.48)  | -2.49)  |        |
|                   | 42.33   | 40.59   | 0.04    |        | 523.31   | 540.94   | 0.35    |        | 850.94   | 475.54   | -1.70   |        | 12.71   | 6.54   | -1.98   |        |
| Egypt             | (41.05, | (39.70, | (-0.11, | 0.631  | (518.81, | (537.70, | (0.21,  | <0.001 | (845.33, | (472.51, | (-2.07, | <0.001 | (12.02, | (6.18, | (-2.39, | <0.001 |
|                   | 43.64)  | 41.49)  | 0.18)   |        | 527.83)  | 544.19)  | 0.48)   |        | 856.59)  | 478.58)  | -1.32)  |        | 13.42)  | 6.90)  | -1.57)  |        |
|                   | 36.18   | 28.06   | -1.10   |        | 471.39   | 441.88   | -0.18   |        | 527.97   | 179.63   | -4.13   |        | 8.10    | 2.31   | -4.87   |        |
| El Salvador       | (32.46, | (25.27, | (-1.28, | <0.001 | (457.73, | (430.59, | (-0.29, | 0.001  | (513.75, | (172.45, | (-4.64, | <0.001 | (6.41,  | (1.56, | (-5.43, | <0.001 |
|                   | 40.24)  | 31.09)  | -0.92)  |        | 485.37)  | 453.40)  | -0.08)  |        | 542.50)  | 187.04)  | -3.61)  |        | 10.13)  | 3.31)  | -4.31)  |        |
|                   | 43.06   | 21.91   | -2.69   |        | 555.21   | 487.45   | -0.46   |        | 487.47   | 199.81   | -3.38   |        | 7.22    | 2.32   | -4.28   |        |
| Equatorial Guinea | (29.45, | (16.57, | (-2.93, | <0.001 | (503.62, | (461.20, | (-0.56, | <0.001 | (438.68, | (182.83, | (-3.61, | <0.001 | (2.45,  | (0.82, | (-4.53, | <0.001 |
|                   | 60.96)  | 28.51)  | -2.45)  |        | 610.83)  | 514.89)  | -0.36)  |        | 540.34)  | 218.03)  | -3.16)  |        | 16.68)  | 5.25)  | -4.02)  |        |
|                   | 37.87   | 24.67   | -1.61   |        | 572.16   | 524.18   | -0.28   |        | 486.37   | 312.86   | -1.23   |        | 7.28    | 4.29   | -1.48   |        |
| Eritrea           | (32.64, | (21.99, | (-1.79, | <0.001 | (551.95, | (511.88, | (-0.37, | <0.001 | (467.11, | (303.07, | (-1.42, | <0.001 | (5.07,  | (3.19, | (-1.70, | <0.001 |

|          |         |         |         |        |          |          |         |        |          |          |         |        |        |        |         |        |
|----------|---------|---------|---------|--------|----------|----------|---------|--------|----------|----------|---------|--------|--------|--------|---------|--------|
|          | 43.72)  | 27.61)  | -1.42)  |        | 592.96)  | 536.72)  | -0.18)  |        | 506.25)  | 322.91)  | -1.04)  |        | 10.16) | 5.64)  | -1.26)  |        |
|          | 33.39)  | 32.03)  | -0.37)  |        | 418.08)  | 406.15)  | -0.17)  |        | 256.66)  | 116.97)  | -3.69)  |        | 2.97)  | 0.58)  | -6.35)  |        |
| Estonia  | (27.13, | (24.77, | (-0.59, | 0.001  | (395.05, | (379.03, | (-0.27, | 0.002  | (238.62, | (102.55, | (-4.18, | <0.001 | (1.35, | (0.03, | (-7.47, | <0.001 |
|          | 40.74)  | 41.08)  | -0.16)  |        | 442.17)  | 434.96)  | -0.07)  |        | 275.76)  | 133.13)  | -3.21)  |        | 5.81)  | 3.57)  | -5.23)  |        |
|          | 23.54)  | 22.64)  | 0.02)   |        | 503.88)  | 487.95)  | -0.04)  |        | 306.37)  | 234.03)  | -0.36)  |        | 4.12)  | 2.88)  | -0.49)  |        |
| Eswatini | (16.18, | (17.08, | (-0.54, | 0.956  | (468.19, | (461.05, | (-0.14, | 0.409  | (277.96, | (215.34, | (-1.03, | 0.287  | (1.43, | (1.16, | (-1.37, | 0.271  |
|          | 33.35)  | 29.50)  | 0.57)   |        | 541.80)  | 516.07)  | 0.06)   |        | 337.09)  | 253.97)  | 0.32)   |        | 9.54)  | 6.04)  | 0.40)   |        |
|          | 38.72)  | 17.78)  | -3.32)  |        | 564.80)  | 478.92)  | -0.57)  |        | 581.84)  | 215.74)  | -4.09)  |        | 8.92)  | 2.61)  | -5.01)  |        |
| Ethiopia | (37.41, | (17.20, | (-3.60, | <0.001 | (559.87, | (475.94, | (-0.71, | <0.001 | (576.71, | (213.69, | (-4.37, | <0.001 | (8.29, | (2.38, | (-5.34, | <0.001 |
|          | 40.07)  | 18.38)  | -3.03)  |        | 569.76)  | 481.91)  | -0.44)  |        | 587.01)  | 217.80)  | -3.82)  |        | 9.59)  | 2.85)  | -4.67)  |        |
|          | 54.29)  | 48.69)  | -0.51)  |        | 638.57)  | 609.89)  | -0.16)  |        | 790.36)  | 637.03)  | -1.18)  |        | 11.29) | 8.76)  | -1.39)  |        |
| Fiji     | (43.20, | (38.95, | (-0.59, | <0.001 | (598.83, | (574.04, | (-0.22, | <0.001 | (746.23, | (600.37, | (-1.39, | <0.001 | (6.57, | (4.96, | (-1.64, | <0.001 |
|          | 67.46)  | 60.16)  | -0.42)  |        | 680.34)  | 647.42)  | -0.10)  |        | 836.51)  | 675.37)  | -0.96)  |        | 18.22) | 14.37) | -1.14)  |        |
|          | 23.15)  | 20.88)  | -0.34)  |        | 426.52)  | 403.48)  | 0.12)   |        | 232.34)  | 110.03)  | -2.65)  |        | 3.00)  | 0.88)  | -4.35)  |        |
| Finland  | (20.16, | (17.92, | (-0.46, | <0.001 | (413.26, | (389.99, | (-0.19, | 0.445  | (222.74, | (103.08, | (-2.88, | <0.001 | (2.01, | (0.37, | (-4.58, | <0.001 |
|          | 26.50)  | 24.23)  | -0.23)  |        | 440.13)  | 417.35)  | 0.43)   |        | 242.31)  | 117.37)  | -2.42)  |        | 4.36)  | 1.83)  | -4.13)  |        |
|          | 17.56)  | 15.77)  | 0.10)   |        | 292.52)  | 263.19)  | -0.19)  |        | 163.29)  | 87.37)   | -2.39)  |        | 2.05)  | 0.80)  | -3.55)  |        |
| France   | (16.79, | (15.02, | (-0.08, | 0.277  | (289.36, | (260.06, | (-0.35, | 0.015  | (160.94, | (85.57,  | (-2.49, | <0.001 | (1.79, | (0.64, | (-3.74, | <0.001 |
|          | 18.35)  | 16.56)  | 0.28)   |        | 295.70)  | 266.35)  | -0.04)  |        | 165.67)  | 89.19)   | -2.29)  |        | 2.33)  | 0.99)  | -3.36)  |        |
|          | 27.57)  | 22.45)  | -0.93)  |        | 512.92)  | 486.41)  | -0.14)  |        | 313.64)  | 183.83)  | -2.04)  |        | 4.28)  | 2.04)  | -2.75)  |        |
| Gabon    | (20.06, | (17.88, | (-1.04, | <0.001 | (479.27, | (464.39, | (-0.21, | <0.001 | (286.74, | (170.23, | (-2.34, | <0.001 | (1.66, | (0.84, | (-3.20, | <0.001 |
|          | 37.14)  | 27.87)  | -0.82)  |        | 548.47)  | 509.25)  | -0.07)  |        | 342.52)  | 198.26)  | -1.74)  |        | 9.20)  | 4.18)  | -2.30)  |        |
|          | 32.76)  | 31.99)  | -0.01)  |        | 554.58)  | 548.31)  | 0.07)   |        | 334.00)  | 314.83)  | -0.15)  |        | 4.51)  | 4.19)  | -0.21)  |        |
| Gambia   | (24.63, | (26.86, | (-0.05, | 0.757  | (520.23, | (526.83, | (-0.00, | 0.059  | (306.80, | (298.29, | (-0.34, | 0.131  | (1.84, | (2.46, | (-0.46, | 0.097  |
|          | 42.93)  | 37.87)  | 0.04)   |        | 590.82)  | 570.49)  | 0.14)   |        | 363.14)  | 332.10)  | 0.05)   |        | 9.46)  | 6.72)  | 0.04)   |        |
|          | 41.91)  | 29.90)  | -0.87)  |        | 504.89)  | 454.52)  | -0.36)  |        | 527.24)  | 262.10)  | -2.35)  |        | 7.17)  | 2.91)  | -2.56)  |        |
| Georgia  | (38.17, | (25.69, | (-1.09, | <0.001 | (491.73, | (437.73, | (-0.40, | <0.001 | (513.73, | (249.30, | (-3.22, | <0.001 | (5.68, | (1.72, | (-3.71, | <0.001 |
|          | 45.93)  | 34.69)  | -0.65)  |        | 518.34)  | 471.86)  | -0.33)  |        | 541.04)  | 275.47)  | -1.47)  |        | 8.96)  | 4.74)  | -1.40)  |        |
|          | 22.28)  | 18.18)  | -0.77)  |        | 349.55)  | 316.08)  | -0.30)  |        | 230.43)  | 97.39)   | -3.26)  |        | 3.10)  | 0.86)  | -4.98)  |        |
| Germany  | (21.53, | (17.44, | (-0.88, | <0.001 | (346.53, | (312.98, | (-0.45, | <0.001 | (227.99, | (95.69,  | (-3.61, | <0.001 | (2.83, | (0.71, | (-5.37, | <0.001 |
|          | 23.06)  | 18.94)  | -0.66)  |        | 352.59)  | 319.20)  | -0.16)  |        | 232.88)  | 99.13)   | -2.90)  |        | 3.40)  | 1.04)  | -4.59)  |        |
|          | 45.54)  | 35.25)  | -0.99)  |        | 601.35)  | 548.44)  | -0.20)  |        | 634.90)  | 391.03)  | -1.59)  |        | 9.80)  | 5.58)  | -1.84)  |        |
| Ghana    | (42.97, | (33.83, | (-1.11, | <0.001 | (592.16, | (542.90, | (-0.29, | <0.001 | (625.23, | (386.29, | (-1.76, | <0.001 | (8.62, | (5.02, | (-2.04, | <0.001 |

|               |         |         |         |        |          |          |         |        |           |          |         |        |         |         |         |        |
|---------------|---------|---------|---------|--------|----------|----------|---------|--------|-----------|----------|---------|--------|---------|---------|---------|--------|
|               | 48.22)  | 36.71)  | -0.86)  |        | 610.64)  | 554.03)  | -0.12)  |        | 644.70)   | 395.82)  | -1.42)  |        | 11.11)  | 6.19)   | -1.64)  |        |
|               | 19.98)  | 16.82)  | -0.68)  |        | 348.14)  | 338.09)  | -0.01)  |        | 226.69)   | 129.05)  | -2.14)  |        | 2.98)   | 1.38)   | -2.96)  |        |
| Greece        | (18.01, | (14.82, | (-0.76, | <0.001 | (339.78, | (328.84, | (-0.18, | 0.900  | (219.95,  | (123.42, | (-2.29, | <0.001 | (2.26,  | (0.86,  | (-3.15, | <0.001 |
|               | 22.10)  | 19.04)  | -0.61)  |        | 356.66)  | 347.57)  | 0.16)   |        | 233.58)   | 134.89)  | -1.99)  |        | 3.87)   | 2.12)   | -2.77)  |        |
|               | 31.68)  | 20.68)  | -1.70)  |        | 502.40)  | 429.22)  | -0.45)  |        | 560.39)   | 245.49)  | -3.46)  |        | 8.57)   | 3.15)   | -4.00)  |        |
| Greenland     | (7.86,  | (2.69,  | (-1.81, | <0.001 | (381.41, | (311.02, | (-0.73, | 0.003  | (432.10,  | (159.04, | (-3.83, | <0.001 | (0.20,  | (0.00,  | (-4.47, | <0.001 |
|               | 93.95)  | 78.55)  | -1.58)  |        | 654.97)  | 580.59)  | -0.16)  |        | 720.14)   | 365.60)  | -3.09)  |        | 60.22)  | 50.37)  | -3.53)  |        |
|               | 45.05)  | 38.07)  | -0.79)  |        | 560.39)  | 531.32)  | -0.10)  |        | 484.64)   | 264.74)  | -2.90)  |        | 7.50)   | 3.75)   | -3.47)  |        |
| Grenada       | (17.71, | (15.44, | (-1.03, | <0.001 | (447.52, | (432.26, | (-0.23, | 0.099  | (379.62,  | (195.70, | (-3.31, | <0.001 | (0.26,  | (0.02,  | (-3.97, | <0.001 |
|               | 95.82)  | 79.19)  | -0.55)  |        | 694.32)  | 647.11)  | 0.02)   |        | 610.90)   | 350.99)  | -2.48)  |        | 41.33)  | 29.04)  | -2.98)  |        |
|               | 46.21)  | 55.15)  | 0.66)   |        | 570.59)  | 631.49)  | 0.54)   |        | 344.39)   | 426.38)  | 0.39)   |        | 3.82)   | 5.08)   | 0.34)   |        |
| Guam          | (24.68, | (31.14, | (0.57,  | <0.001 | (486.01, | (541.58, | (0.48,  | <0.001 | (279.58,  | (353.25, | (0.16,  | 0.002  | (0.12,  | (0.32,  | (0.01,  | 0.047  |
|               | 79.24)  | 90.77)  | 0.75)   |        | 665.93)  | 732.33)  | 0.59)   |        | 420.03)   | 510.49)  | 0.61)   |        | 20.83)  | 23.18)  | 0.68)   |        |
|               | 57.20)  | 29.97)  | -2.71)  |        | 593.23)  | 463.73)  | -1.01)  |        | 635.93)   | 306.18)  | -3.52)  |        | 9.88)   | 4.41)   | -3.88)  |        |
| Guatemala     | (53.25, | (28.27, | (-2.90, | <0.001 | (580.29, | (456.97, | (-1.16, | <0.001 | (622.64,  | (300.71, | (-3.92, | <0.001 | (8.27,  | (3.77,  | (-4.32, | <0.001 |
|               | 61.37)  | 31.74)  | -2.52)  |        | 606.40)  | 470.56)  | -0.86)  |        | 649.44)   | 311.73)  | -3.11)  |        | 11.72)  | 5.12)   | -3.44)  |        |
|               | 33.08)  | 34.48)  | 0.35)   |        | 430.29)  | 445.83)  | 0.32)   |        | 462.44)   | 413.99)  | 0.06)   |        | 7.01)   | 6.10)   | -0.00)  |        |
| Guinea        | (29.73, | (32.13, | (0.22,  | <0.001 | (418.09, | (437.43, | (0.22,  | <0.001 | (449.66,  | (405.81, | (-0.09, | 0.442  | (5.51,  | (5.13,  | (-0.17, | 0.967  |
|               | 36.72)  | 36.96)  | 0.47)   |        | 442.76)  | 454.36)  | 0.41)   |        | 475.50)   | 422.30)  | 0.21)   |        | 8.82)   | 7.20)   | 0.16)   |        |
|               | 51.41)  | 49.00)  | -0.15)  |        | 590.39)  | 572.02)  | -0.02)  |        | 691.93)   | 573.56)  | -0.39)  |        | 10.74)  | 8.71)   | -0.44)  |        |
| Guinea-Bissau | (41.32, | (42.19, | (-0.25, | 0.002  | (555.60, | (548.59, | (-0.07, | 0.576  | (653.57,  | (549.73, | (-0.59, | <0.001 | (6.41,  | (5.97,  | (-0.66, | <0.001 |
|               | 63.31)  | 56.65)  | -0.06)  |        | 626.91)  | 596.24)  | 0.04)   |        | 732.06)   | 598.20)  | -0.19)  |        | 16.98)  | 12.31)  | -0.22)  |        |
|               | 50.14)  | 41.31)  | -0.81)  |        | 646.06)  | 574.51)  | -0.27)  |        | 631.16)   | 488.41)  | -1.40)  |        | 9.84)   | 7.50)   | -1.51)  |        |
| Guyana        | (39.55, | (31.70, | (-0.88, | <0.001 | (606.70, | (537.19, | (-0.40, | <0.001 | (592.24,  | (453.99, | (-1.82, | <0.001 | (5.51,  | (3.79,  | (-1.99, | <0.001 |
|               | 62.82)  | 52.98)  | -0.74)  |        | 687.42)  | 613.82)  | -0.14)  |        | 672.09)   | 524.81)  | -0.97)  |        | 16.40)  | 13.40)  | -1.02)  |        |
|               | 81.21)  | 61.00)  | -1.03)  |        | 674.12)  | 587.53)  | -0.39)  |        | 1363.71)  | 887.56)  | -1.14)  |        | 22.57)  | 14.40)  | -1.19)  |        |
| Haiti         | (76.14, | (58.11, | (-1.09, | <0.001 | (659.41, | (578.50, | (-0.52, | <0.001 | (1342.80) | (876.46, | (-1.29, | <0.001 | (19.94, | (13.01, | (-1.35, | <0.001 |
|               | 86.55)  | 64.00)  | -0.98)  |        | 689.08)  | 596.67)  | -0.25)  |        | 1384.89)  | 898.77)  | -0.99)  |        | 25.47)  | 15.89)  | -1.03)  |        |
|               | 37.03)  | 27.75)  | -1.23)  |        | 475.82)  | 465.44)  | -0.02)  |        | 835.17)   | 396.83)  | -2.95)  |        | 13.46)  | 6.10)   | -3.14)  |        |
| Honduras      | (32.86, | (25.52, | (-1.42, | <0.001 | (460.71, | (456.21, | (-0.15, | 0.726  | (815.20,  | (388.24, | (-3.32, | <0.001 | (11.01, | (5.07,  | (-3.55, | <0.001 |
|               | 41.60)  | 30.12)  | -1.04)  |        | 491.33)  | 474.81)  | 0.11)   |        | 855.53)   | 405.56)  | -2.59)  |        | 16.32)  | 7.29)   | -2.73)  |        |
| Hungary       | 45.95)  | 31.56)  | -1.57)  | <0.001 | 591.27)  | 497.92)  | -0.55)  | <0.001 | 424.57)   | 173.63)  | -3.78)  | <0.001 | 5.49)   | 1.29)   | -6.07)  | <0.001 |

|                               |         |         |         |        |          |          |         |        |          |          |         |        |         |         |         |        |
|-------------------------------|---------|---------|---------|--------|----------|----------|---------|--------|----------|----------|---------|--------|---------|---------|---------|--------|
|                               | (42.97, | (28.74, | (-1.71, |        | (580.37, | (486.55, | (-0.66, |        | (415.51, | (166.98, | (-4.04, | (4.52, | (0.79,  | (-6.43, |         |        |
|                               | 49.09)  | 34.61)  | -1.43)  |        | 602.33)  | 509.51)  | -0.44)  |        | 433.80)  | 180.50)  | -3.52)  | 6.63)  | 2.04)   | -5.71)  |         |        |
|                               | 18.57   | 14.76   | -1.19   |        | 273.81   | 257.78   | -0.32   |        | 160.21   | 77.21    | -2.92   | 2.05   | 0.62    | -4.80   |         |        |
| Iceland                       | (8.71,  | (6.67,  | (-1.47, | <0.001 | (230.39, | (218.59, | (-0.47, | <0.001 | (127.45, | (56.50,  | (-3.16, | <0.001 | (0.06,  | (0.00,  | (-5.09, | <0.001 |
|                               | 34.98)  | 28.92)  | -0.91)  |        | 323.26)  | 302.42)  | -0.16)  |        | 199.04)  | 103.54)  | -2.68)  |        | 11.54)  | 8.65)   | -4.52)  |        |
|                               | 27.40   | 24.85   | -0.48   |        | 368.65   | 381.46   | 0.18    |        | 310.13   | 213.55   | -1.62   |        | 4.31    | 2.64    | -2.09   |        |
| India                         | (27.14, | (24.66, | (-0.71, | <0.001 | (367.70, | (380.75, | (0.04,  | 0.015  | (309.25, | (213.01, | (-1.85, | <0.001 | (4.20,  | (2.58,  | (-2.38, | <0.001 |
|                               | 27.67)  | 25.03)  | -0.25)  |        | 369.60)  | 382.18)  | 0.32)   |        | 311.00)  | 214.09)  | -1.40)  |        | 4.41)   | 2.70)   | -1.80)  |        |
|                               | 56.38   | 48.76   | -0.62   |        | 674.68   | 620.17   | -0.28   |        | 846.58   | 491.87   | -1.80   |        | 12.33   | 6.35    | -2.14   |        |
| Indonesia                     | (55.60, | (48.17, | (-0.66, | <0.001 | (672.01, | (618.06, | (-0.35, | <0.001 | (843.57, | (489.99, | (-1.97, | <0.001 | (11.96, | (6.14,  | (-2.37, | <0.001 |
|                               | 57.16)  | 49.36)  | -0.59)  |        | 677.36)  | 622.30)  | -0.21)  |        | 849.60)  | 493.76)  | -1.63)  |        | 12.70)  | 6.57)   | -1.92)  |        |
|                               | 35.61   | 27.16   | -1.11   |        | 467.45   | 421.29   | -0.37   |        | 345.64   | 199.01   | -1.99   |        | 4.65    | 2.20    | -2.67   |        |
| Iran (Islamic<br>Republic of) | (34.43, | (26.40, | (-1.28, | <0.001 | (463.17, | (418.30, | (-0.53, | <0.001 | (341.96, | (196.94, | (-2.10, | <0.001 | (4.23,  | (1.99,  | (-2.79, | <0.001 |
|                               | 36.83)  | 27.93)  | -0.94)  |        | 471.77)  | 424.29)  | -0.21)  |        | 349.35)  | 201.10)  | -1.89)  |        | 5.11)   | 2.43)   | -2.55)  |        |
|                               | 57.60   | 46.53   | -1.04   |        | 694.31   | 620.44   | -0.46   |        | 627.47   | 417.33   | -1.92   |        | 8.95    | 5.53    | -2.24   |        |
| Iraq                          | (54.82, | (45.07, | (-1.18, | <0.001 | (684.60, | (615.12, | (-0.53, | <0.001 | (618.26, | (412.95, | (-2.25, | <0.001 | (7.87,  | (5.03,  | (-2.63, | <0.001 |
|                               | 60.50)  | 48.02)  | -0.89)  |        | 704.13)  | 625.81)  | -0.39)  |        | 636.79)  | 421.74)  | -1.59)  |        | 10.14)  | 6.06)   | -1.84)  |        |
|                               | 22.05   | 16.36   | -1.48   |        | 320.77   | 300.57   | -0.37   |        | 198.63   | 83.34    | -3.17   |        | 2.62    | 0.66    | -4.79   |        |
| Ireland                       | (18.64, | (13.74, | (-1.67, | <0.001 | (307.35, | (288.95, | (-0.50, | <0.001 | (188.09, | (77.30,  | (-3.43, | <0.001 | (1.54,  | (0.24,  | (-5.25, | <0.001 |
|                               | 25.92)  | 19.36)  | -1.29)  |        | 334.62)  | 312.57)  | -0.23)  |        | 209.61)  | 89.75)   | -2.91)  |        | 4.18)   | 1.51)   | -4.34)  |        |
|                               | 18.02   | 16.24   | -0.61   |        | 277.39   | 282.64   | -0.01   |        | 126.21   | 64.15    | -2.67   |        | 1.41    | 0.35    | -5.45   |        |
| Israel                        | (15.42, | (14.33, | (-1.01, | 0.004  | (266.90, | (274.50, | (-0.20, | 0.913  | (119.18, | (60.30,  | (-2.95, | <0.001 | (0.76,  | (0.12,  | (-5.75, | <0.001 |
|                               | 20.94)  | 18.33)  | -0.21)  |        | 288.19)  | 290.97)  | 0.18)   |        | 133.55)  | 68.18)   | -2.39)  |        | 2.40)   | 0.78)   | -5.15)  |        |
|                               | 18.56   | 14.64   | -1.34   |        | 288.53   | 289.76   | 0.06    |        | 181.73   | 89.75    | -2.89   |        | 2.35    | 0.78    | -4.55   |        |
| Italy                         | (17.75, | (13.82, | (-1.52, | <0.001 | (285.31, | (286.08, | (-0.03, | 0.201  | (179.17, | (87.71,  | (-3.07, | <0.001 | (2.07,  | (0.60,  | (-4.81, | <0.001 |
|                               | 19.40)  | 15.51)  | -1.17)  |        | 291.78)  | 293.48)  | 0.16)   |        | 184.32)  | 91.82)   | -2.70)  |        | 2.67)   | 0.99)   | -4.29)  |        |
|                               | 33.86   | 39.21   | 0.63    |        | 473.02   | 527.24   | 0.50    |        | 325.87   | 292.08   | -0.51   |        | 4.84    | 4.21    | -0.65   |        |
| Jamaica                       | (28.67, | (34.34, | (0.48,  | <0.001 | (453.13, | (508.98, | (0.41,  | <0.001 | (309.29, | (278.52, | (-0.97, | 0.028  | (3.00,  | (2.72,  | (-1.17, | 0.019  |
|                               | 39.78)  | 44.59)  | 0.78)   |        | 493.62)  | 546.00)  | 0.60)   |        | 343.16)  | 306.14)  | -0.06)  |        | 7.47)   | 6.23)   | -0.11)  |        |
|                               | 21.27   | 22.64   | 0.11    |        | 299.97   | 344.37   | 0.51    |        | 167.15   | 113.11   | -1.39   |        | 1.93    | 0.87    | -2.63   |        |
| Japan                         | (20.68, | (21.94, | (-0.10, | 0.286  | (297.70, | (341.58, | (0.32,  | <0.001 | (165.47, | (111.52, | (-1.47, | <0.001 | (1.76,  | (0.74,  | (-2.80, | <0.001 |
|                               | 21.89)  | 23.36)  | 0.33)   |        | 302.25)  | 347.18)  | 0.70)   |        | 168.85)  | 114.72)  | -1.32)  |        | 2.12)   | 1.02)   | -2.46)  |        |
|                               | 50.87   | 39.78   | -1.08   | <0.001 | 678.68   | 616.00   | -0.33   | <0.001 | 346.27   | 166.72   | -3.13   | <0.001 | 4.22    | 1.25    | -5.12   | <0.001 |

|              |         |         |         |        |          |          |         |        |           |           |         |        |        |        |         |        |
|--------------|---------|---------|---------|--------|----------|----------|---------|--------|-----------|-----------|---------|--------|--------|--------|---------|--------|
|              | (45.12, | (37.18, | (-1.24, |        | (657.55, | (605.64, | (-0.40, |        | (331.04,  | (161.34,  | (-3.52, |        | (2.67, | (0.82, | (-5.82, |        |
|              | 57.19)  | 42.53)  | -0.92)  |        | 700.37)  | 626.51)  | -0.25)  |        | 362.07)   | 172.24)   | -2.74)  |        | 6.40)  | 1.83)  | -4.42)  |        |
|              | 44.66   | 33.06   | -1.06   |        | 530.28   | 468.91   | -0.42   |        | 374.18    | 284.61    | -1.60   |        | 4.64   | 3.38   | -1.89   |        |
| Kazakhstan   | (42.43, | (31.22, | (-1.46, | <0.001 | (522.55, | (461.89, | (-0.54, | <0.001 | (367.68,  | (279.17,  | (-2.31, | <0.001 | (3.94, | (2.81, | (-2.81, | <0.001 |
|              | 46.97)  | 35.00)  | -0.67)  |        | 538.09)  | 476.03)  | -0.30)  |        | 380.77)   | 290.14)   | -0.89)  |        | 5.43)  | 4.03)  | -0.96)  |        |
|              | 27.67   | 22.86   | -0.96   |        | 629.71   | 616.26   | -0.07   |        | 298.22    | 258.14    | -0.59   |        | 3.72   | 3.07   | -0.80   |        |
| Kenya        | (25.97, | (21.93, | (-1.13, | <0.001 | (621.81, | (611.49, | (-0.14, | 0.079  | (292.57,  | (254.98,  | (-0.74, | <0.001 | (3.10, | (2.72, | (-1.04, | <0.001 |
|              | 29.46)  | 23.82)  | -0.80)  |        | 637.70)  | 621.06)  | 0.01)   |        | 303.97)   | 261.33)   | -0.43)  |        | 4.44)  | 3.44)  | -0.55)  |        |
|              | 141.11  | 113.13  | -0.82   |        | 931.77   | 801.64   | -0.50   |        | 1699.03   | 1452.48   | -0.62   |        | 26.29  | 22.42  | -0.64   |        |
| Kiribati     | (86.84, | (74.89, | (-0.85, | <0.001 | (779.58, | (692.63, | (-0.51, | <0.001 | (1493.10, | (1304.95, | (-0.69, | <0.001 | (6.78, | (7.71, | (-0.72, | <0.001 |
|              | 218.37) | 164.36) | -0.80)  |        | 1106.11) | 923.19)  | -0.49)  |        | '         | '         | -0.56)  |        | 71.33) | 51.13) | -0.57)  |        |
|              | 35.73   | 35.27   | -0.14   |        | 489.99   | 496.78   | 0.04    |        | 232.28    | 149.81    | -2.17   |        | 2.64   | 1.22   | -3.50   |        |
| Kuwait       | (29.76, | (31.71, | (-0.28, | 0.045  | (467.22, | (483.21, | (-0.04, | 0.290  | (216.64,  | (142.31,  | (-2.59, | <0.001 | (1.22, | (0.65, | (-4.23, | <0.001 |
|              | 42.59)  | 39.24)  | -0.00)  |        | 513.64)  | 510.74)  | 0.12)   |        | 248.79)   | 157.71)   | -1.74)  |        | 5.03)  | 2.28)  | -2.75)  |        |
|              | 44.52   | 28.01   | -2.02   |        | 468.68   | 380.26   | -0.92   |        | 470.70    | 230.28    | -3.53   |        | 6.58   | 2.68   | -4.24   |        |
| Kyrgyzstan   | (40.14, | (25.20, | (-2.20, | <0.001 | (454.23, | (369.75, | (-1.02, | <0.001 | (456.19,  | (222.07,  | (-4.04, | <0.001 | (4.96, | (1.86, | (-4.90, | <0.001 |
|              | 49.27)  | 31.04)  | -1.84)  |        | 483.49)  | 390.99)  | -0.82)  |        | 485.59)   | 238.72)   | -3.02)  |        | 8.59)  | 3.76)  | -3.58)  |        |
| Lao People's | 67.01   | 41.20   | -2.01   |        | 590.84   | 464.70   | -0.93   |        | 627.16    | 511.74    | -0.80   |        | 8.91   | 7.24   | -0.85   |        |
| Democratic   | (61.10, | (38.01, | (-2.20, | <0.001 | (573.12, | (453.88, | (-1.01, | <0.001 | (608.69,  | (500.31,  | (-1.12, | <0.001 | (6.81, | (5.93, | (-1.23, | <0.001 |
| Republic     | 73.37)  | 44.59)  | -1.83)  |        | 609.00)  | 475.73)  | -0.84)  |        | 646.08)   | 523.36)   | -0.48)  |        | 11.48) | 8.75)  | -0.46)  |        |
|              | 31.93   | 30.45   | -0.24   |        | 416.97   | 442.90   | 0.28    |        | 225.00    | 147.69    | -2.27   |        | 2.41   | 0.99   | -3.86   |        |
| Latvia       | (27.15, | (24.42, | (-0.32, | <0.001 | (399.12, | (418.94, | (0.20,  | <0.001 | (211.88,  | (133.96,  | (-2.75, | <0.001 | (1.24, | (0.20, | (-4.82, | <0.001 |
|              | 37.37)  | 37.71)  | -0.15)  |        | 435.45)  | 468.06)  | 0.37)   |        | 238.76)   | 162.62)   | -1.80)  |        | 4.30)  | 3.33)  | -2.89)  |        |
|              | 37.66   | 35.88   | -0.07   |        | 516.34   | 526.34   | 0.25    |        | 246.83    | 158.01    | -1.46   |        | 2.88   | 1.28   | -2.91   |        |
| Lebanon      | (32.79, | (32.35, | (-0.28, | 0.538  | (497.89, | (512.55, | (0.14,  | <0.001 | (234.10,  | (150.46,  | (-1.74, | <0.001 | (1.65, | (0.70, | (-3.28, | <0.001 |
|              | 43.07)  | 39.75)  | 0.15)   |        | 535.30)  | 540.45)  | 0.36)   |        | 260.09)   | 165.89)   | -1.18)  |        | 4.68)  | 2.24)  | -2.54)  |        |
|              | 19.99   | 29.19   | 1.83    |        | 449.16   | 485.27   | 0.45    |        | 226.73    | 300.86    | 2.38    |        | 2.85   | 4.09   | 2.97    |        |
| Lesotho      | (15.32, | (24.36, | (1.60,  | <0.001 | (426.28, | (465.14, | (0.37,  | <0.001 | (210.22,  | (284.91,  | (1.78,  | <0.001 | (1.26, | (2.42, | (2.17,  | <0.001 |
|              | 25.73)  | 34.73)  | 2.07)   |        | 473.03)  | 506.06)  | 0.54)   |        | 244.27)   | 317.49)   | 2.98)   |        | 5.63)  | 6.51)  | 3.78)   |        |
|              | 36.69   | 29.91   | -0.72   |        | 519.56   | 490.11   | -0.05   |        | 468.37    | 354.64    | -0.96   |        | 6.91   | 4.97   | -1.16   |        |
| Liberia      | (30.52, | (26.50, | (-0.80, | <0.001 | (495.72, | (476.18, | (-0.15, | 0.299  | (445.59,  | (342.70,  | (-1.11, | <0.001 | (4.38, | (3.64, | (-1.33, | <0.001 |
|              | 43.77)  | 33.65)  | -0.64)  |        | 544.27)  | 504.35)  | 0.05)   |        | 492.02)   | 366.91)   | -0.81)  |        | 10.37) | 6.65)  | -1.00)  |        |

|                  |         |         |         |        |          |          |         |        |          |          |         |        |         |         |         |        |
|------------------|---------|---------|---------|--------|----------|----------|---------|--------|----------|----------|---------|--------|---------|---------|---------|--------|
|                  | 44.55   | 47.65   | 0.44    |        | 536.45   | 604.21   | 0.62    |        | 521.35   | 409.69   | -0.62   |        | 7.49    | 5.40    | -0.98   |        |
| Libya            | (39.41, | (44.23, | (0.32,  | <0.001 | (518.29, | (591.87, | (0.54,  | <0.001 | (503.58, | (399.51, | (-1.06, | 0.007  | (5.47,  | (4.29,  | (-1.51, | 0.001  |
|                  | 50.23)  | 51.28)  | 0.57)   |        | 555.14)  | 616.76)  | 0.70)   |        | 539.64)  | 420.08)  | -0.19)  |        | 10.06)  | 6.71)   | -0.44)  |        |
|                  | 36.77   | 34.50   | -0.16   |        | 478.84   | 467.59   | 0.00    |        | 215.00   | 170.65   | -0.81   |        | 2.06    | 1.34    | -1.34   |        |
| Lithuania        | (32.43, | (29.16, | (-0.32, | 0.060  | (462.81, | (447.28, | (-0.08, | 0.985  | (204.28, | (158.53, | (-1.11, | <0.001 | (1.14,  | (0.49,  | (-1.95, | <0.001 |
|                  | 41.56)  | 40.64)  | 0.01)   |        | 495.31)  | 488.69)  | 0.08)   |        | 226.15)  | 183.55)  | -0.51)  |        | 3.46)   | 3.13)   | -0.72)  |        |
|                  | 19.25   | 15.09   | -1.06   |        | 300.46   | 289.49   | -0.11   |        | 211.31   | 90.81    | -3.38   |        | 2.88    | 0.79    | -5.01   |        |
| Luxembourg       | (10.67, | (8.72,  | (-1.20, | <0.001 | (262.66, | (258.50, | (-0.27, | 0.184  | (179.85, | (73.81,  | (-3.65, | <0.001 | (0.41,  | (0.01,  | (-5.43, | <0.001 |
|                  | 33.20)  | 25.01)  | -0.93)  |        | 343.01)  | 323.66)  | 0.05)   |        | 247.56)  | 111.07)  | -3.12)  |        | 11.75)  | 6.16)   | -4.59)  |        |
|                  | 67.93   | 49.08   | -1.32   |        | 748.66   | 677.99   | -0.32   |        | 1155.93  | 750.30   | -1.35   |        | 18.44   | 11.58   | -1.46   |        |
| Madagascar       | (64.28, | (47.11, | (-1.38, | <0.001 | (736.79, | (670.83, | (-0.39, | <0.001 | (1140.89 | (742.60, | (-1.55, | <0.001 | (16.56, | (10.63, | (-1.67, | <0.001 |
|                  | 71.74)  | 51.11)  | -1.25)  |        | 760.69)  | 685.20)  | -0.26)  |        | ,        | 758.06)  | -1.15)  |        | 20.48)  | 12.59)  | -1.25)  |        |
|                  | 29.99   | 20.44   | -1.77   |        | 586.50   | 564.43   | -0.15   |        | 433.30   | 245.70   | -2.40   |        | 6.19    | 2.94    | -3.13   |        |
| Malawi           | (27.33, | (18.96, | (-1.97, | <0.001 | (574.98, | (556.74, | (-0.25, | 0.008  | (423.07, | (240.50, | (-2.63, | <0.001 | (5.00,  | (2.38,  | (-3.41, | <0.001 |
|                  | 32.85)  | 22.00)  | -1.57)  |        | 598.21)  | 572.20)  | -0.04)  |        | 443.74)  | 250.99)  | -2.18)  |        | 7.59)   | 3.59)   | -2.85)  |        |
|                  | 41.33   | 32.78   | -0.85   |        | 574.54   | 515.40   | -0.33   |        | 466.83   | 265.61   | -1.56   |        | 5.99    | 2.71    | -2.28   |        |
| Malaysia         | (39.24, | (31.41, | (-1.09, | <0.001 | (566.67, | (509.91, | (-0.45, | <0.001 | (459.73, | (261.67, | (-1.96, | <0.001 | (5.20,  | (2.32,  | (-2.82, | <0.001 |
|                  | 43.51)  | 34.20)  | -0.61)  |        | 582.49)  | 520.93)  | -0.20)  |        | 474.02)  | 269.60)  | -1.17)  |        | 6.86)   | 3.14)   | -1.73)  |        |
|                  | 40.70   | 24.33   | -2.21   |        | 485.38   | 395.59   | -0.71   |        | 595.97   | 146.32   | -5.34   |        | 8.58    | 1.06    | -7.95   |        |
| Maldives         | (21.72, | (15.27, | (-2.60, | <0.001 | (412.61, | (356.05, | (-0.89, | <0.001 | (514.33, | (122.65, | (-5.70, | <0.001 | (1.53,  | (0.03,  | (-8.29, | <0.001 |
|                  | 71.31)  | 37.53)  | -1.82)  |        | 568.62)  | 438.86)  | -0.52)  |        | 688.13)  | 173.82)  | -4.98)  |        | 28.98)  | 7.43)   | -7.62)  |        |
|                  | 55.40   | 39.78   | -1.37   |        | 566.63   | 486.51   | -0.54   |        | 826.74   | 505.40   | -1.90   |        | 13.13   | 7.64    | -2.09   |        |
| Mali             | (51.57, | (37.72, | (-1.45, | <0.001 | (554.43, | (479.43, | (-0.61, | <0.001 | (811.80, | (498.04, | (-2.06, | <0.001 | (11.30, | (6.74,  | (-2.27, | <0.001 |
|                  | 59.44)  | 41.92)  | -1.29)  |        | 579.05)  | 493.69)  | -0.47)  |        | 841.90)  | 512.84)  | -1.73)  |        | 15.20)  | 8.62)   | -1.92)  |        |
|                  | 20.93   | 17.17   | -0.91   |        | 303.31   | 292.04   | -0.10   |        | 186.95   | 107.52   | -1.73   |        | 2.41    | 1.06    | -2.59   |        |
| Malta            | (11.67, | (8.88,  | (-1.05, | <0.001 | (264.01, | (253.45, | (-0.22, | 0.093  | (156.36, | (84.50,  | (-1.92, | <0.001 | (0.23,  | (0.01,  | (-2.87, | <0.001 |
|                  | 35.19)  | 31.28)  | -0.78)  |        | 347.20)  | 335.72)  | 0.02)   |        | 222.19)  | 135.82)  | -1.54)  |        | 10.44)  | 9.59)   | -2.32)  |        |
|                  | 86.58   | 90.18   | -0.16   |        | 711.06   | 730.67   | -0.08   |        | 834.40   | 1078.08  | 0.46    |        | 12.10   | 16.25   | 0.43    |        |
| Marshall Islands | (33.17, | (43.78, | (-0.54, | 0.400  | (532.08, | (582.42, | (-0.27, | 0.364  | (638.60, | (895.90, | (0.07,  | 0.022  | (0.19,  | (1.73,  | (0.01,  | 0.044  |
|                  | 187.41) | 165.00) | 0.22)   |        | 933.39)  | 905.56)  | 0.10)   |        | 1073.60) | 1286.78) | 0.85)   |        | 78.64)  | 62.05)  | 0.84)   |        |
|                  | 41.56   | 28.44   | -1.51   |        | 590.41   | 524.80   | -0.40   |        | 503.64   | 261.70   | -2.04   |        | 7.36    | 3.28    | -2.49   |        |
| Mauritania       | (35.08, | (24.72, | (-1.63, | <0.001 | (565.68, | (508.69, | (-0.49, | <0.001 | (480.51, | (250.20, | (-2.12, | <0.001 | (4.79,  | (2.09,  | (-2.58, | <0.001 |



|                   |         |         |         |        |          |          |         |        |           |          |         |        |         |        |         |        |
|-------------------|---------|---------|---------|--------|----------|----------|---------|--------|-----------|----------|---------|--------|---------|--------|---------|--------|
|                   | 48.95)  | 32.59)  | -1.39)  |        | 616.00)  | 541.32)  | -0.32)  |        | 527.64)   | 273.62)  | -1.96)  |        | 10.88)  | 4.91)  | -2.39)  |        |
|                   | 41.36)  | 30.99)  | -1.40)  |        | 552.37)  | 466.05)  | -0.85)  |        | 436.80)   | 259.45)  | -2.37)  |        | 5.57)   | 2.80)  | -3.01)  |        |
| Mauritius         | (33.68, | (24.30, | (-1.55, | <0.001 | (523.26, | (438.96, | (-0.96, | <0.001 | (410.89,  | (239.43, | (-2.62, | <0.001 | (3.00,  | (1.11, | (-3.34, | <0.001 |
|                   | 50.31)  | 39.01)  | -1.25)  |        | 582.70)  | 494.43)  | -0.73)  |        | 463.94)   | 280.76)  | -2.12)  |        | 9.48)   | 5.95)  | -2.69)  |        |
|                   | 41.64)  | 30.70)  | -1.28)  |        | 645.90)  | 571.12)  | -0.39)  |        | 293.43)   | 163.08)  | -1.89)  |        | 3.98)   | 1.85)  | -2.50)  |        |
| Mexico            | (40.65, | (30.02, | (-1.56, | <0.001 | (642.02, | (568.20, | (-0.54, | <0.001 | (290.81,  | (161.52, | (-2.20, | <0.001 | (3.68,  | (1.69, | (-2.86, | <0.001 |
|                   | 42.64)  | 31.38)  | -1.00)  |        | 649.80)  | 574.06)  | -0.25)  |        | 296.06)   | 164.66)  | -1.59)  |        | 4.30)   | 2.02)  | -2.14)  |        |
| Micronesia        | 109.77) | 75.30)  | -1.56)  |        | 804.76)  | 657.16)  | -0.77)  |        | 1060.72)  | 974.17)  | -0.57)  |        | 15.69)  | 14.48) | -0.61)  |        |
| (Federated States | (66.11, | (41.30, | (-1.71, | <0.001 | (676.27, | (545.82, | (-0.86, | <0.001 | (912.27,  | (837.97, | (-0.69, | <0.001 | (2.81,  | (2.63, | (-0.74, | <0.001 |
| of)               | 172.70) | 126.98) | -1.41)  |        | 951.53)  | 785.16)  | -0.67)  |        | 1227.38)  | 1126.86) | -0.46)  |        | 50.39)  | 45.90) | -0.48)  |        |
|                   | 18.01)  | 16.77)  | -0.29)  |        | 299.08)  | 300.85)  | 0.05)   |        | 189.74)   | 118.20)  | -1.51)  |        | 2.48)   | 1.25)  | -2.21)  |        |
| Monaco            | (0.27,  | (0.21,  | (-0.34, | <0.001 | (164.09, | (166.62, | (-0.09, | 0.473  | (87.11,   | (42.18,  | (-1.74, | <0.001 | (0.00,  | (0.00, | (-2.51, | <0.001 |
|                   | 152.53) | 120.26) | -0.25)  |        | 523.02)  | 506.50)  | 0.19)   |        | 384.56)   | 269.60)  | -1.27)  |        | 129.54) | 93.37) | -1.90)  |        |
|                   | 58.34)  | 39.76)  | -1.70)  |        | 516.76)  | 467.31)  | -0.41)  |        | 825.05)   | 539.53)  | -1.99)  |        | 12.81)  | 7.91)  | -2.20)  |        |
| Mongolia          | (50.76, | (35.26, | (-1.85, | <0.001 | (493.90, | (451.49, | (-0.51, | <0.001 | (795.54,  | (522.70, | (-2.29, | <0.001 | (9.32,  | (6.00, | (-2.55, | <0.001 |
|                   | 66.83)  | 44.74)  | -1.54)  |        | 540.50)  | 483.62)  | -0.31)  |        | 855.45)   | 556.83)  | -1.69)  |        | 17.25)  | 10.31) | -1.85)  |        |
|                   | 40.60)  | 34.13)  | -0.89)  |        | 531.73)  | 506.10)  | -0.26)  |        | 371.65)   | 286.61)  | -1.19)  |        | 4.67)   | 3.28)  | -1.49)  |        |
| Montenegro        | (30.10, | (24.00, | (-1.07, | <0.001 | (491.63, | (464.36, | (-0.36, | <0.001 | (338.28,  | (255.65, | (-1.93, | 0.003  | (1.66,  | (0.82, | (-2.54, | 0.007  |
|                   | 53.62)  | 47.37)  | -0.70)  |        | 574.27)  | 550.79)  | -0.17)  |        | 407.45)   | 320.51)  | -0.45)  |        | 10.40)  | 9.23)  | -0.44)  |        |
|                   | 48.89)  | 49.16)  | -0.05)  |        | 564.68)  | 573.01)  | 0.07)   |        | 515.09)   | 347.03)  | -1.45)  |        | 7.39)   | 4.46)  | -1.81)  |        |
| Morocco           | (46.91, | (47.57, | (-0.16, | 0.440  | (557.97, | (567.57, | (-0.02, | 0.104  | (508.66,  | (342.80, | (-1.67, | <0.001 | (6.63,  | (4.00, | (-2.09, | <0.001 |
|                   | 50.93)  | 50.78)  | 0.07)   |        | 571.46)  | 578.50)  | 0.15)   |        | 521.58)   | 351.31)  | -1.23)  |        | 8.22)   | 4.97)  | -1.52)  |        |
|                   | 31.22)  | 26.96)  | -0.48)  |        | 623.76)  | 638.77)  | 0.22)   |        | 302.35)   | 262.78)  | -0.10)  |        | 3.84)   | 3.10)  | -0.23)  |        |
| Mozambique        | (28.96, | (25.54, | (-0.70, | <0.001 | (613.75, | (632.03, | (0.12,  | <0.001 | (295.25,  | (258.32, | (-0.33, | 0.412  | (3.07,  | (2.62, | (-0.56, | 0.151  |
|                   | 33.61)  | 28.44)  | -0.27)  |        | 633.90)  | 645.56)  | 0.33)   |        | 309.57)   | 267.30)  | 0.14)   |        | 4.75)   | 3.65)  | 0.09)   |        |
|                   | 24.94)  | 22.67)  | -0.41)  |        | 342.90)  | 343.93)  | 0.07)   |        | 1446.69)  | 616.40)  | -3.24)  |        | 23.68)  | 9.37)  | -3.48)  |        |
| Myanmar           | (23.86, | (21.80, | (-0.62, | <0.001 | (338.85, | (340.53, | (-0.05, | 0.237  | (1438.33) | (611.85, | (-3.61, | <0.001 | (22.61, | (8.82, | (-3.90, | <0.001 |
|                   | 26.06)  | 23.56)  | -0.20)  |        | 346.99)  | 347.35)  | 0.20)   |        | 1455.10)  | 620.98)  | -2.87)  |        | 24.79)  | 9.95)  | -3.06)  |        |
|                   | 28.23)  | 20.55)  | -1.49)  |        | 538.83)  | 505.52)  | -0.21)  |        | 289.78)   | 167.02)  | -2.12)  |        | 3.79)   | 1.68)  | -3.08)  |        |
| Namibia           | (21.95, | (16.76, | (-1.68, | <0.001 | (510.80, | (486.12, | (-0.28, | <0.001 | (268.74,  | (155.85, | (-2.39, | <0.001 | (1.71,  | (0.73, | (-3.49, | <0.001 |
|                   | 35.87)  | 24.96)  | -1.31)  |        | 568.12)  | 525.54)  | -0.13)  |        | 312.12)   | 178.80)  | -1.84)  |        | 7.36)   | 3.33)  | -2.67)  |        |
| Nauru             | 87.49)  | 80.94)  | -0.27)  | 0.380  | 757.20)  | 722.10)  | -0.21)  | 0.075  | 1351.58)  | 1526.74) | 0.29)   | 0.358  | 20.91)  | 23.94) | 0.26)   | 0.451  |

|                             |                    |                    |                   |        |                      |                      |                   |        |                      |                            |                   |        |                    |                    |                   |
|-----------------------------|--------------------|--------------------|-------------------|--------|----------------------|----------------------|-------------------|--------|----------------------|----------------------------|-------------------|--------|--------------------|--------------------|-------------------|
|                             | (7.79,<br>360.25)  | (7.70,<br>326.73)  | (-0.90,<br>0.35)  |        | (418.51,<br>1266.35) | (408.13,<br>1188.16) | (-0.43,<br>0.02)  |        | (880.80,<br>1989.36) | (1049.16,<br>,<br>2152.24) | (-0.34,<br>0.93)  |        | (0.00,<br>247.35)  | (0.03,<br>231.12)  | (-0.43,<br>0.95)  |
|                             | 20.61              | 17.90              | -0.52             |        | 285.97               | 267.56               | -0.10             |        | 287.56               | 139.14                     | -2.53             |        | 4.25               | 1.64               | -3.36             |
| Nepal                       | (19.12,<br>22.20)  | (16.91,<br>18.94)  | (-0.73,<br>-0.31) | <0.001 | (280.36,<br>291.66)  | (263.69,<br>271.49)  | (-0.21,<br>0.02)  | 0.091  | (281.83,<br>293.38)  | (136.32,<br>142.01)        | (-2.82,<br>-2.23) | <0.001 | (3.57,<br>5.02)    | (1.35,<br>1.99)    | (-3.71,<br>-3.01) |
|                             | 22.02              | 17.57              | -1.09             |        | 308.86               | 318.31               | 0.04              |        | 189.72               | 95.03                      | -3.08             |        | 2.49               | 0.82               | -4.67             |
| Netherlands                 | (20.38,<br>23.77)  | (16.01,<br>19.24)  | (-1.23,<br>-0.94) | <0.001 | (302.63,<br>315.20)  | (311.56,<br>325.18)  | (-0.07,<br>0.15)  | 0.445  | (184.86,<br>194.69)  | (91.37,<br>98.81)          | (-3.42,<br>-2.73) | <0.001 | (1.96,<br>3.12)    | (0.52,<br>1.25)    | (-5.24,<br>-4.10) |
|                             | 21.13              | 20.06              | -0.18             |        | 299.29               | 374.07               | 0.86              |        | 180.00               | 109.80                     | -2.00             |        | 2.28               | 0.87               | -3.65             |
| New Zealand                 | (17.86,<br>24.83)  | (16.94,<br>23.62)  | (-0.48,<br>0.11)  | 0.219  | (286.60,<br>312.41)  | (360.15,<br>388.39)  | (0.60,<br>1.12)   | <0.001 | (170.20,<br>190.23)  | (102.36,<br>117.66)        | (-2.20,<br>-1.80) | <0.001 | (1.30,<br>3.72)    | (0.33,<br>1.87)    | (-3.85,<br>-3.46) |
|                             | 38.03              | 30.90              | -0.82             |        | 543.17               | 505.31               | -0.17             |        | 277.15               | 134.45                     | -2.44             |        | 3.93               | 1.47               | -3.37             |
| Nicaragua                   | (33.47,<br>43.07)  | (28.04,<br>33.99)  | (-0.98,<br>-0.65) | <0.001 | (525.67,<br>561.15)  | (493.53,<br>517.32)  | (-0.29,<br>-0.05) | 0.006  | (264.50,<br>290.28)  | (128.39,<br>140.73)        | (-2.88,<br>-2.00) | <0.001 | (2.54,<br>5.85)    | (0.90,<br>2.28)    | (-3.90,<br>-2.84) |
|                             | 38.68              | 29.76              | -1.09             |        | 493.82               | 448.51               | -0.30             |        | 502.20               | 360.79                     | -1.43             |        | 7.58               | 5.20               | -1.64             |
| Niger                       | (35.26,<br>42.36)  | (27.92,<br>31.69)  | (-1.22,<br>-0.97) | <0.001 | (481.66,<br>506.23)  | (441.50,<br>455.61)  | (-0.40,<br>-0.19) | <0.001 | (489.70,<br>514.97)  | (354.34,<br>367.33)        | (-1.64,<br>-1.22) | <0.001 | (6.09,<br>9.34)    | (4.44,<br>6.06)    | (-1.88,<br>-1.41) |
|                             | 27.90              | 23.33              | -0.88             |        | 482.25               | 495.99               | 0.12              |        | 290.03               | 209.13                     | -1.49             |        | 3.93               | 2.46               | -2.10             |
| Nigeria                     | (27.04,<br>28.79)  | (22.85,<br>23.82)  | (-1.04,<br>-0.72) | <0.001 | (478.74,<br>485.78)  | (493.81,<br>498.17)  | (0.04,<br>0.20)   | 0.003  | (287.23,<br>292.87)  | (207.69,<br>210.59)        | (-1.72,<br>-1.26) | <0.001 | (3.60,<br>4.28)    | (2.30,<br>2.62)    | (-2.40,<br>-1.79) |
|                             | 50.88              | 48.44              | -0.19             |        | 593.87               | 593.91               | 0.02              |        | 617.39               | 544.73                     | -0.73             |        | 8.60               | 7.27               | -0.92             |
| Niue                        | (0.00,<br>1141.41) | (0.00,<br>1556.39) | (-0.23,<br>-0.16) | <0.001 | (81.81,<br>2068.44)  | (49.48,<br>2502.25)  | (-0.04,<br>0.07)  | 0.507  | (89.54,<br>2106.38)  | (38.24,<br>2422.08)        | (-0.89,<br>-0.58) | <0.001 | (0.00,<br>1057.42) | (0.00,<br>1475.87) | (-1.13,<br>-0.70) |
|                             | 45.43              | 33.45              | -1.28             |        | 569.12               | 533.02               | -0.30             |        | 566.57               | 343.52                     | -2.08             |        | 7.75               | 4.08               | -2.62             |
| North Macedonia             | (39.06,<br>52.55)  | (27.97,<br>39.83)  | (-1.35,<br>-1.21) | <0.001 | (545.98,<br>593.00)  | (510.37,<br>556.54)  | (-0.41,<br>-0.20) | <0.001 | (543.47,<br>590.42)  | (325.31,<br>362.60)        | (-2.34,<br>-1.82) | <0.001 | (5.26,<br>11.01)   | (2.34,<br>6.81)    | (-2.97,<br>-2.27) |
|                             | 64.10              | 47.27              | -1.32             |        | 651.64               | 590.23               | -0.43             |        | 750.38               | 401.42                     | -2.69             |        | 10.76              | 4.84               | -3.31             |
| Northern Mariana<br>Islands | (26.71,<br>131.85) | (7.09,<br>173.36)  | (-1.40,<br>-1.24) | <0.001 | (513.12,<br>817.83)  | (393.14,<br>859.94)  | (-0.51,<br>-0.36) | <0.001 | (601.38,<br>926.90)  | (241.92,<br>635.21)        | (-2.97,<br>-2.40) | <0.001 | (0.51,<br>55.56)   | (0.00,<br>107.32)  | (-3.69,<br>-2.94) |
|                             | 23.32              | 22.79              | -0.71             |        | 363.58               | 356.99               | -0.14             |        | 163.59               | 75.80                      | -2.83             |        | 1.91               | 0.39               | -5.65             |
| Norway                      | (20.09,<br>)       | (19.73,<br>)       | (-0.97,<br>)      | <0.001 | (350.44,<br>)        | (344.61,<br>)        | (-0.27,<br>)      | 0.042  | (154.82,<br>)        | (70.15,<br>)               | (-3.01,<br>)      | <0.001 | (1.07,<br>)        | (0.09,<br>)        | (-5.85,<br>)      |

|                  |         |         |         |        |          |          |         |        |          |          |         |        |         |         |         |        |
|------------------|---------|---------|---------|--------|----------|----------|---------|--------|----------|----------|---------|--------|---------|---------|---------|--------|
|                  | 26.95)  | 26.21)  | -0.46)  |        | 377.11)  | 369.74)  | -0.01)  |        | 172.74)  | 81.81)   | -2.65)  |        | 3.16)   | 1.12)   | -5.45)  |        |
|                  | 43.37)  | 35.46)  | -0.77)  |        | 552.40)  | 553.00)  | 0.16)   |        | 445.70)  | 274.25)  | -1.24)  |        | 6.12)   | 3.12)   | -1.78)  |        |
| Oman             | (35.86, | (31.43, | (-0.86, | <0.001 | (524.69, | (536.83, | (0.08,  | <0.001 | (420.95, | (262.68, | (-1.47, | <0.001 | (3.53,  | (2.00,  | (-2.10, | <0.001 |
|                  | 52.05)  | 39.92)  | -0.68)  |        | 581.25)  | 569.57)  | 0.23)   |        | 471.59)  | 286.24)  | -1.01)  |        | 9.97)   | 4.70)   | -1.46)  |        |
|                  | 46.59)  | 42.40)  | -0.63)  |        | 523.45)  | 533.70)  | -0.02)  |        | 433.45)  | 466.75)  | -0.20)  |        | 6.15)   | 6.64)   | -0.29)  |        |
| Pakistan         | (45.56, | (41.78, | (-0.81, | <0.001 | (520.00, | (531.48, | (-0.11, | 0.671  | (430.28, | (464.66, | (-0.42, | 0.065  | (5.78,  | (6.39,  | (-0.55, | 0.027  |
|                  | 47.65)  | 43.04)  | -0.46)  |        | 526.91)  | 535.93)  | 0.07)   |        | 436.63)  | 468.85)  | 0.01)   |        | 6.55)   | 6.90)   | -0.04)  |        |
|                  | 46.22)  | 48.30)  | 0.14)   |        | 573.92)  | 591.12)  | 0.13)   |        | 567.63)  | 527.19)  | -0.15)  |        | 7.79)   | 6.99)   | -0.24)  |        |
| Palau            | (3.37,  | (2.24,  | (0.04,  | 0.005  | (343.88, | (332.83, | (0.04,  | 0.007  | (338.80, | (285.03, | (-0.23, | 0.001  | (0.00,  | (0.00,  | (-0.33, | <0.001 |
|                  | 202.48) | 252.90) | 0.23)   |        | 902.60)  | 982.55)  | 0.22)   |        | 895.26)  | 903.54)  | -0.07)  |        | 136.04) | 182.87) | -0.14)  |        |
|                  | 38.17)  | 33.51)  | -0.44)  |        | 510.72)  | 508.90)  | 0.11)   |        | 275.82)  | 177.06)  | -1.60)  |        | 3.37)   | 1.67)   | -2.69)  |        |
| Palestine        | (31.57, | (29.90, | (-0.70, | 0.002  | (485.83, | (494.53, | (0.01,  | 0.033  | (257.61, | (168.63, | (-1.91, | <0.001 | (1.62,  | (0.94,  | (-3.14, | <0.001 |
|                  | 45.85)  | 37.45)  | -0.17)  |        | 536.64)  | 523.60)  | 0.22)   |        | 295.08)  | 185.83)  | -1.28)  |        | 6.33)   | 2.77)   | -2.24)  |        |
|                  | 33.17)  | 29.47)  | -0.46)  |        | 494.53)  | 477.57)  | -0.05)  |        | 257.63)  | 150.59)  | -1.70)  |        | 3.59)   | 1.77)   | -2.27)  |        |
| Panama           | (28.12, | (25.79, | (-0.61, | <0.001 | (474.54, | (462.38, | (-0.18, | 0.419  | (243.26, | (142.11, | (-2.01, | <0.001 | (2.07,  | (0.96,  | (-2.67, | <0.001 |
|                  | 38.90)  | 33.53)  | -0.31)  |        | 515.19)  | 493.13)  | 0.08)   |        | 272.68)  | 159.44)  | -1.38)  |        | 5.84)   | 2.98)   | -1.88)  |        |
|                  | 75.25)  | 79.35)  | 0.23)   |        | 622.73)  | 640.05)  | 0.14)   |        | 555.59)  | 626.80)  | 0.54)   |        | 7.41)   | 8.57)   | 0.64)   |        |
| Papua New Guinea | (69.03, | (75.43, | (0.12,  | <0.001 | (604.49, | (628.80, | (0.10,  | <0.001 | (538.44, | (615.69, | (0.33,  | <0.001 | (5.53,  | (7.31,  | (0.37,  | <0.001 |
|                  | 81.91)  | 83.43)  | 0.35)   |        | 641.41)  | 651.47)  | 0.19)   |        | 573.18)  | 638.07)  | 0.76)   |        | 9.74)   | 9.98)   | 0.91)   |        |
|                  | 38.65)  | 32.79)  | -0.72)  |        | 511.19)  | 511.11)  | -0.05)  |        | 380.65)  | 188.25)  | -2.78)  |        | 5.75)   | 2.44)   | -3.36)  |        |
| Paraguay         | (34.23, | (29.89, | (-0.83, | <0.001 | (494.84, | (499.48, | (-0.13, | 0.214  | (366.49, | (181.20, | (-3.04, | <0.001 | (4.12,  | (1.69,  | (-3.69, | <0.001 |
|                  | 43.51)  | 35.89)  | -0.61)  |        | 527.96)  | 522.93)  | 0.03)   |        | 395.24)  | 195.51)  | -2.52)  |        | 7.84)   | 3.40)   | -3.03)  |        |
|                  | 43.61)  | 30.77)  | -1.37)  |        | 501.81)  | 429.52)  | -0.52)  |        | 505.66)  | 220.77)  | -3.02)  |        | 7.69)   | 2.97)   | -3.45)  |        |
| Peru             | (41.62, | (29.47, | (-1.52, | <0.001 | (494.94, | (424.63, | (-0.61, | <0.001 | (498.88, | (217.25, | (-3.35, | <0.001 | (6.87,  | (2.58,  | (-3.83, | <0.001 |
|                  | 45.68)  | 32.12)  | -1.22)  |        | 508.76)  | 434.46)  | -0.43)  |        | 512.52)  | 224.33)  | -2.69)  |        | 8.59)   | 3.41)   | -3.07)  |        |
|                  | 36.87)  | 36.79)  | 0.05)   |        | 488.03)  | 514.43)  | 0.28)   |        | 206.94)  | 394.03)  | 2.86)   |        | 1.84)   | 5.02)   | 3.88)   |        |
| Philippines      | (35.77, | (35.99, | (-0.00, | 0.059  | (484.04, | (511.42, | (0.21,  | <0.001 | (204.32, | (391.39, | (2.12,  | <0.001 | (1.59,  | (4.73,  | (2.64,  | <0.001 |
|                  | 37.99)  | 37.61)  | 0.11)   |        | 492.05)  | 517.46)  | 0.35)   |        | 209.58)  | 396.70)  | 3.61)   |        | 2.11)   | 5.33)   | 5.13)   |        |
|                  | 33.72)  | 25.12)  | -1.36)  |        | 456.20)  | 456.21)  | 0.02)   |        | 325.98)  | 164.21)  | -2.66)  |        | 4.12)   | 1.26)   | -4.42)  |        |
| Poland           | (32.42, | (23.90, | (-1.65, | <0.001 | (451.37, | (451.01, | (-0.20, | 0.878  | (321.94, | (161.13, | (-2.85, | <0.001 | (3.68,  | (1.01,  | (-4.56, | <0.001 |
|                  | 35.06)  | 26.39)  | -1.07)  |        | 461.07)  | 461.47)  | 0.24)   |        | 330.05)  | 167.35)  | -2.47)  |        | 4.60)   | 1.56)   | -4.28)  |        |
|                  | 23.46)  | 14.77)  | -1.97)  |        | 385.32)  | 347.47)  | -0.30)  |        | 268.81)  | 90.66)   | -4.43)  |        | 3.69)   | 0.69)   | -6.40)  |        |
| Portugal         | (21.33, | (12.93, | (-2.10, | <0.001 | (376.53, | (338.33, | (-0.44, | <0.001 | (261.48, | (86.08,  | (-4.76, | <0.001 | (2.88,  | (0.36,  | (-6.99, | <0.001 |

|                    |         |         |         |        |          |          |         |        |          |          |         |        |         |        |         |        |
|--------------------|---------|---------|---------|--------|----------|----------|---------|--------|----------|----------|---------|--------|---------|--------|---------|--------|
|                    | 25.74)  | 16.81)  | -1.85)  |        | 394.25)  | 356.81)  | -0.17)  |        | 276.29)  | 95.43)   | -4.11)  |        | 4.66)   | 1.24)  | -5.80)  |        |
|                    | 35.20)  | 37.30)  | 0.15)   |        | 458.45)  | 456.81)  | 0.19)   |        | 179.05)  | 104.20)  | -2.35)  |        | 2.29)   | 1.03)  | -3.56)  |        |
| Puerto Rico        | (31.01, | (32.53, | (0.01,  | 0.034  | (442.99, | (439.70, | (0.13,  | <0.001 | (169.44, | (96.13,  | (-2.56, | <0.001 | (1.32,  | (0.38, | (-3.91, | <0.001 |
|                    | 39.80)  | 42.60)  | 0.29)   |        | 474.31)  | 474.43)  | 0.24)   |        | 189.06)  | 112.79)  | -2.14)  |        | 3.69)   | 2.26)  | -3.20)  |        |
|                    | 51.50)  | 39.09)  | -1.18)  |        | 641.07)  | 564.21)  | -0.53)  |        | 451.90)  | 198.08)  | -3.13)  |        | 6.06)   | 1.88)  | -4.50)  |        |
| Qatar              | (35.87, | (32.83, | (-1.35, | <0.001 | (582.27, | (539.76, | (-0.56, | <0.001 | (402.40, | (183.34, | (-3.53, | <0.001 | (1.69,  | (0.73, | (-5.06, | <0.001 |
|                    | 72.24)  | 46.49)  | -1.02)  |        | 704.67)  | 589.73)  | -0.50)  |        | 506.28)  | 213.93)  | -2.74)  |        | 16.29)  | 4.46)  | -3.94)  |        |
|                    | 33.02)  | 18.91)  | -2.54)  |        | 397.42)  | 297.87)  | -1.37)  |        | 440.00)  | 105.36)  | -5.34)  |        | 6.37)   | 0.85)  | -7.47)  |        |
| Republic of Korea  | (31.89, | (18.01, | (-2.81, | <0.001 | (393.53, | (294.22, | (-1.56, | <0.001 | (435.89, | (103.21, | (-5.80, | <0.001 | (5.88,  | (0.67, | (-7.95, | <0.001 |
|                    | 34.17)  | 19.85)  | -2.26)  |        | 401.35)  | 301.55)  | -1.17)  |        | 444.14)  | 107.56)  | -4.88)  |        | 6.89)   | 1.07)  | -7.00)  |        |
| Republic of        | 33.63)  | 31.98)  | -0.21)  |        | 415.40)  | 425.07)  | 0.10)   |        | 256.60)  | 165.26)  | -1.83)  |        | 3.00)   | 1.39)  | -2.73)  |        |
| Moldova            | (30.01, | (27.86, | (-0.31, | <0.001 | (402.37, | (409.68, | (0.07,  | <0.001 | (246.36, | (155.76, | (-2.22, | <0.001 | (2.00,  | (0.67, | (-3.39, | <0.001 |
|                    | 37.61)  | 36.63)  | -0.11)  |        | 428.77)  | 440.98)  | 0.13)   |        | 267.19)  | 175.28)  | -1.44)  |        | 4.37)   | 2.72)  | -2.06)  |        |
|                    | 34.99)  | 28.10)  | -0.92)  |        | 497.98)  | 488.02)  | 0.06)   |        | 313.91)  | 220.05)  | -1.30)  |        | 3.79)   | 2.14)  | -2.08)  |        |
| Romania            | (33.25, | (26.19, | (-1.00, | <0.001 | (491.32, | (479.96, | (-0.06, | 0.320  | (308.65, | (214.68, | (-1.52, | <0.001 | (3.24,  | (1.65, | (-2.42, | <0.001 |
|                    | 36.81)  | 30.12)  | -0.85)  |        | 504.71)  | 496.20)  | 0.19)   |        | 319.24)  | 225.53)  | -1.09)  |        | 4.42)   | 2.75)  | -1.74)  |        |
|                    | 34.72)  | 32.41)  | -0.26)  |        | 460.50)  | 518.39)  | 0.48)   |        | 262.89)  | 271.99)  | -0.15)  |        | 2.92)   | 2.97)  | -0.37)  |        |
| Russian Federation | (34.07, | (31.72, | (-0.42, | 0.003  | (458.09, | (515.56, | (0.40,  | <0.001 | (261.07, | (269.99, | (-0.70, | 0.591  | (2.73,  | (2.77, | (-1.17, | 0.354  |
|                    | 35.39)  | 33.12)  | -0.10)  |        | 462.92)  | 521.24)  | 0.56)   |        | 264.73)  | 274.01)  | 0.41)   |        | 3.12)   | 3.18)  | 0.44)   |        |
|                    | 61.57)  | 18.93)  | -5.01)  |        | 666.37)  | 485.24)  | -1.31)  |        | 819.13)  | 250.12)  | -5.22)  |        | 12.87)  | 3.21)  | -6.08)  |        |
| Rwanda             | (57.23, | (17.28, | (-5.43, | <0.001 | (652.23, | (476.87, | (-1.47, | <0.001 | (803.10, | (244.03, | (-5.74, | <0.001 | (10.91, | (2.54, | (-6.67, | <0.001 |
|                    | 66.17)  | 20.69)  | -4.59)  |        | 680.75)  | 493.73)  | -1.15)  |        | 835.41)  | 256.32)  | -4.71)  |        | 15.09)  | 3.99)  | -5.49)  |        |
|                    | 61.08)  | 36.52)  | -2.23)  |        | 672.01)  | 557.61)  | -0.66)  |        | 948.09)  | 187.16)  | -6.25)  |        | 15.59)  | 2.27)  | -7.69)  |        |
| Saint Kitts and    | (19.69, | (10.53, | (-2.46, | <0.001 | (506.61, | (430.53, | (-0.79, | <0.001 | (748.57, | (116.89, | (-6.74, | <0.001 | (0.75,  | (0.00, | (-8.16, | <0.001 |
| Nevis              | 145.83) | 93.59)  | -2.00)  |        | 876.16)  | 712.13)  | -0.54)  |        | 1186.24) | 285.95)  | -5.76)  |        | 78.04)  | 40.54) | -7.22)  |        |
|                    | 45.37)  | 38.09)  | -0.77)  |        | 623.35)  | 557.69)  | -0.35)  |        | 382.84)  | 195.96)  | -2.41)  |        | 5.70)   | 2.50)  | -3.04)  |        |
| Saint Lucia        | (22.79, | (20.33, | (-0.98, | <0.001 | (529.64, | (481.51, | (-0.49, | <0.001 | (309.12, | (152.13, | (-2.82, | <0.001 | (0.33,  | (0.04, | (-3.53, | <0.001 |
|                    | 82.28)  | 65.67)  | -0.56)  |        | 729.98)  | 642.97)  | -0.22)  |        | 469.85)  | 249.03)  | -2.00)  |        | 27.90)  | 16.64) | -2.54)  |        |
|                    | 39.35)  | 37.88)  | -0.35)  |        | 497.81)  | 516.67)  | 0.14)   |        | 429.72)  | 289.39)  | -2.53)  |        | 6.59)   | 4.15)  | -2.97)  |        |
| Saint Vincent and  | (16.51, | (16.27, | (-0.46, | <0.001 | (403.85, | (423.76, | (0.07,  | 0.001  | (342.64, | (221.07, | (-3.00, | <0.001 | (0.32,  | (0.07, | (-3.52, | <0.001 |
| the Grenadines     | 81.31)  | 75.22)  | -0.25)  |        | 608.74)  | 624.12)  | 0.21)   |        | 533.86)  | 372.39)  | -2.05)  |        | 34.90)  | 26.07) | -2.41)  |        |
|                    | 66.33)  | 65.98)  | 0.04)   |        | 677.91)  | 677.18)  | 0.04)   |        | 694.76)  | 787.10)  | 0.56)   |        | 9.72)   | 11.30) | 0.66)   |        |
| Samoa              | (38.82, | (42.23, | (-0.03, | 0.275  | (581.32, | (595.04, | (-0.02, | 0.167  | (596.21, | (697.97, | (0.46,  | <0.001 | (1.55,  | (3.07, | (0.54,  | <0.001 |

|                 |         |         |         |        |          |          |         |        |          |          |         |        |         |         |         |        |
|-----------------|---------|---------|---------|--------|----------|----------|---------|--------|----------|----------|---------|--------|---------|---------|---------|--------|
|                 | 107.07) | 98.82)  | 0.11)   |        | 786.87)  | 767.92)  | 0.09)   |        | 805.79)  | 884.86)  | 0.65)   |        | 33.15)  | 29.61)  | 0.78)   |        |
|                 | 18.26   | 16.76   | -0.33   |        | 288.68   | 284.70   | 0.01    |        | 105.97   | 89.76    | -0.49   |        | 1.06    | 0.79    | -0.93   |        |
| San Marino      | (0.20,  | (0.33,  | (-0.40, | <0.001 | (151.76, | (161.76, | (-0.10, | 0.848  | (32.25,  | (29.00,  | (-0.58, | <0.001 | (0.00,  | (0.00,  | (-1.08, | <0.001 |
|                 | 126.63) | 108.16) | -0.27)  |        | 501.92)  | 469.57)  | 0.12)   |        | 260.53)  | 216.81)  | -0.41)  |        | 95.39)  | 80.39)  | -0.79)  |        |
| Sao Tome and    | 63.99   | 52.42   | -1.02   |        | 729.39   | 707.14   | -0.24   |        | 480.44   | 469.48   | -0.94   |        | 6.70    | 6.52    | -1.26   |        |
| Principe        | (32.34, | (32.41, | (-1.20, | <0.001 | (611.19, | (627.78, | (-0.33, | <0.001 | (383.52, | (404.75, | (-1.58, | 0.005  | (0.25,  | (1.12,  | (-1.99, | 0.002  |
|                 | 115.60) | 80.53)  | -0.85)  |        | 865.50)  | 794.05)  | -0.16)  |        | 595.86)  | 541.87)  | -0.31)  |        | 36.92)  | 21.02)  | -0.53)  |        |
|                 | 33.06   | 44.40   | 1.24    |        | 775.44   | 836.29   | 0.35    |        | 566.28   | 421.66   | -0.80   |        | 7.84    | 5.19    | -1.12   |        |
| Saudi Arabia    | (30.81, | (42.95, | (0.97,  | <0.001 | (764.60, | (829.86, | (-0.02, | 0.064  | (556.83, | (417.18, | (-1.01, | <0.001 | (6.75,  | (4.71,  | (-1.38, | <0.001 |
|                 | 35.44)  | 45.89)  | 1.51)   |        | 786.40)  | 842.76)  | 0.72)   |        | 575.86)  | 426.18)  | -0.60)  |        | 9.07)   | 5.71)   | -0.86)  |        |
|                 | 34.87   | 29.73   | -0.71   |        | 549.83   | 510.51   | -0.21   |        | 388.28   | 273.77   | -1.15   |        | 5.44    | 3.51    | -1.44   |        |
| Senegal         | (31.64, | (27.73, | (-0.78, | <0.001 | (537.10, | (502.26, | (-0.29, | <0.001 | (377.39, | (267.66, | (-1.29, | <0.001 | (4.20,  | (2.85,  | (-1.62, | <0.001 |
|                 | 38.35)  | 31.84)  | -0.63)  |        | 562.81)  | 518.86)  | -0.14)  |        | 399.42)  | 279.98)  | -1.01)  |        | 6.95)   | 4.30)   | -1.26)  |        |
|                 | 40.35   | 29.38   | -1.43   |        | 517.40   | 531.80   | 0.09    |        | 466.19   | 218.50   | -3.24   |        | 6.36    | 1.99    | -4.79   |        |
| Serbia          | (37.45, | (26.64, | (-1.58, | <0.001 | (506.80, | (519.93, | (-0.03, | 0.130  | (456.15, | (210.97, | (-3.54, | <0.001 | (5.25,  | (1.34,  | (-5.26, | <0.001 |
|                 | 43.44)  | 32.33)  | -1.28)  |        | 528.19)  | 543.89)  | 0.21)   |        | 476.41)  | 226.25)  | -2.93)  |        | 7.66)   | 2.87)   | -4.32)  |        |
|                 | 31.30   | 30.34   | -0.11   |        | 472.94   | 472.89   | 0.01    |        | 417.47   | 244.67   | -1.34   |        | 5.48    | 2.48    | -2.02   |        |
| Seychelles      | (9.01,  | (10.36, | (-0.22, | 0.047  | (364.96, | (377.13, | (-0.06, | 0.808  | (315.54, | (177.42, | (-1.64, | <0.001 | (0.04,  | (0.00,  | (-2.45, | <0.001 |
|                 | 82.83)  | 70.47)  | -0.00)  |        | 605.88)  | 586.60)  | 0.08)   |        | 544.73)  | 330.15)  | -1.04)  |        | 44.82)  | 28.34)  | -1.59)  |        |
|                 | 39.00   | 43.59   | 0.43    |        | 573.75   | 581.16   | 0.17    |        | 460.64   | 494.70   | 0.44    |        | 6.66    | 7.20    | 0.48    |        |
| Sierra Leone    | (34.37, | (40.37, | (0.23,  | <0.001 | (555.87, | (569.52, | (0.09,  | <0.001 | (444.42, | (483.82, | (0.14,  | 0.005  | (4.82,  | (5.93,  | (0.13,  | 0.010  |
|                 | 44.11)  | 47.01)  | 0.63)   |        | 592.09)  | 592.99)  | 0.25)   |        | 477.33)  | 505.78)  | 0.74)   |        | 9.00)   | 8.68)   | 0.83)   |        |
|                 | 25.41   | 18.71   | -1.27   |        | 328.70   | 274.15   | -0.62   |        | 181.65   | 73.65    | -3.08   |        | 2.09    | 0.34    | -5.92   |        |
| Singapore       | (21.93, | (16.25, | (-1.43, | <0.001 | (315.86, | (264.30, | (-0.74, | <0.001 | (172.12, | (68.50,  | (-3.23, | <0.001 | (1.19,  | (0.09,  | (-6.15, | <0.001 |
|                 | 29.33)  | 21.55)  | -1.11)  |        | 341.96)  | 284.38)  | -0.49)  |        | 191.61)  | 79.18)   | -2.92)  |        | 3.47)   | 1.14)   | -5.69)  |        |
|                 | 35.19   | 28.79   | -0.83   |        | 485.27   | 425.33   | -0.51   |        | 283.19   | 151.77   | -2.16   |        | 3.26    | 1.12    | -3.74   |        |
| Slovakia        | (31.69, | (25.44, | (-0.97, | <0.001 | (472.00, | (412.15, | (-0.61, | <0.001 | (273.12, | (143.90, | (-2.36, | <0.001 | (2.27,  | (0.55,  | (-4.01, | <0.001 |
|                 | 38.99)  | 32.54)  | -0.69)  |        | 498.83)  | 438.89)  | -0.40)  |        | 293.56)  | 160.02)  | -1.96)  |        | 4.56)   | 2.13)   | -3.47)  |        |
|                 | 27.38   | 22.77   | -0.93   |        | 373.99   | 321.84   | -0.62   |        | 213.58   | 96.24    | -3.10   |        | 2.38    | 0.46    | -6.13   |        |
| Slovenia        | (22.44, | (17.72, | (-1.14, | <0.001 | (355.10, | (302.06, | (-0.74, | <0.001 | (199.39, | (85.38,  | (-3.30, | <0.001 | (1.12,  | (0.03,  | (-6.41, | <0.001 |
|                 | 33.14)  | 29.02)  | -0.72)  |        | 393.68)  | 342.74)  | -0.50)  |        | 228.58)  | 108.28)  | -2.89)  |        | 4.55)   | 2.51)   | -5.84)  |        |
|                 | 112.17  | 95.35   | -0.58   |        | 741.51   | 673.46   | -0.30   |        | 1354.65  | 1409.83  | 0.30    |        | 21.42   | 22.57   | 0.35    |        |
| Solomon Islands | (84.68, | (78.80, | (-0.68, | <0.001 | (668.12, | (628.31, | (-0.35, | <0.001 | (1253.46 | (1343.87 | (0.17,  | <0.001 | (10.38, | (14.90, | (0.20,  | <0.001 |

|                      |         |         |         |        |          |          |         |        |          |          |         |        |         |        |         |        |
|----------------------|---------|---------|---------|--------|----------|----------|---------|--------|----------|----------|---------|--------|---------|--------|---------|--------|
|                      | 146.25) | 114.40) | -0.49)  |        | 821.22)  | 721.06)  | -0.26)  |        | ,        | ,        | 0.44)   |        | 39.64)  | 32.84) | 0.51)   |        |
|                      |         |         |         |        |          |          |         |        | 1462.21) | 1478.25) |         |        |         |        |         |        |
|                      | 48.58   | 33.57   | -1.61   |        | 613.58   | 570.22   | -0.24   |        | 614.01   | 422.95   | -1.25   |        | 9.41    | 6.09   | -1.46   |        |
| Somalia              | (44.67, | (31.58, | (-1.76, | <0.001 | (599.58, | (562.22, | (-0.32, | <0.001 | (599.93, | (415.85, | (-1.36, | <0.001 | (7.74,  | (5.25, | (-1.59, | <0.001 |
|                      | 52.74)  | 35.65)  | -1.45)  |        | 627.82)  | 578.31)  | -0.16)  |        | 628.34)  | 430.14)  | -1.14)  |        | 11.35)  | 7.03)  | -1.34)  |        |
|                      | 34.67   | 20.08   | -2.19   |        | 691.68   | 573.33   | -0.73   |        | 575.81   | 210.05   | -3.55   |        | 8.46    | 2.30   | -4.22   |        |
| South Africa         | (33.34, | (19.28, | (-2.75, | <0.001 | (685.81, | (569.04, | (-0.85, | <0.001 | (570.33, | (207.48, | (-4.97, | <0.001 | (7.80,  | (2.04, | (-6.12, | <0.001 |
|                      | 36.04)  | 20.90)  | -1.63)  |        | 697.60)  | 577.65)  | -0.62)  |        | 581.32)  | 212.64)  | -2.11)  |        | 9.16)   | 2.59)  | -2.27)  |        |
|                      | 32.20   | 26.21   | -0.85   |        | 587.45   | 585.71   | 0.03    |        | 377.01   | 256.21   | -1.37   |        | 5.23    | 3.09   | -1.90   |        |
| South Sudan          | (28.55, | (23.75, | (-0.99, | <0.001 | (572.17, | (574.05, | (-0.06, | 0.453  | (364.31, | (248.42, | (-1.63, | <0.001 | (3.80,  | (2.28, | (-2.23, | <0.001 |
|                      | 36.22)  | 28.86)  | -0.71)  |        | 603.08)  | 597.57)  | 0.12)   |        | 390.06)  | 264.19)  | -1.11)  |        | 7.05)   | 4.10)  | -1.57)  |        |
|                      | 18.97   | 15.32   | -1.30   |        | 308.74   | 295.25   | -0.14   |        | 216.75   | 85.26    | -3.45   |        | 2.88    | 0.70   | -5.28   |        |
| Spain                | (17.97, | (14.40, | (-1.50, | <0.001 | (304.70, | (291.13, | (-0.28, | 0.063  | (213.37, | (83.06,  | (-3.65, | <0.001 | (2.50,  | (0.52, | (-5.47, | <0.001 |
|                      | 20.00)  | 16.30)  | -1.11)  |        | 312.82)  | 299.42)  | 0.01)   |        | 220.17)  | 87.50)   | -3.25)  |        | 3.30)   | 0.94)  | -5.09)  |        |
|                      | 26.61   | 25.47   | -0.20   |        | 415.57   | 416.09   | 0.04    |        | 287.90   | 194.73   | -1.27   |        | 3.34    | 1.79   | -1.99   |        |
| Sri Lanka            | (24.95, | (23.96, | (-0.28, | <0.001 | (408.94, | (409.94, | (-0.04, | 0.299  | (282.40, | (190.53, | (-1.48, | <0.001 | (2.77,  | (1.41, | (-2.34, | <0.001 |
|                      | 28.35)  | 27.05)  | -0.12)  |        | 422.29)  | 422.31)  | 0.12)   |        | 293.48)  | 199.01)  | -1.07)  |        | 3.99)   | 2.24)  | -1.63)  |        |
|                      | 56.31   | 51.82   | -0.36   |        | 569.74   | 581.57   | 0.08    |        | 871.29   | 501.09   | -1.86   |        | 13.50   | 7.08   | -2.16   |        |
| Sudan                | (53.82, | (50.27, | (-0.48, | <0.001 | (561.82, | (576.38, | (-0.01, | 0.082  | (861.51, | (496.27, | (-1.95, | <0.001 | (12.29, | (6.51, | (-2.27, | <0.001 |
|                      | 58.89)  | 53.41)  | -0.25)  |        | 577.75)  | 586.81)  | 0.17)   |        | 881.17)  | 505.95)  | -1.77)  |        | 14.80)  | 7.68)  | -2.06)  |        |
|                      | 44.26   | 40.68   | -0.41   |        | 531.69   | 535.43   | 0.05    |        | 496.99   | 375.62   | -1.49   |        | 7.71    | 5.62   | -1.66   |        |
| Suriname             | (29.98, | (29.61, | (-0.54, | <0.001 | (478.96, | (492.90, | (-0.06, | 0.337  | (445.93, | (340.15, | (-2.07, | <0.001 | (2.59,  | (2.10, | (-2.31, | <0.001 |
|                      | 63.37)  | 54.58)  | -0.28)  |        | 588.96)  | 580.70)  | 0.16)   |        | 552.62)  | 413.82)  | -0.90)  |        | 18.17)  | 12.21) | -1.00)  |        |
|                      | 22.41   | 21.20   | -0.19   |        | 441.95   | 591.86   | 1.37    |        | 155.10   | 109.45   | -1.08   |        | 1.59    | 0.44   | -4.48   |        |
| Sweden               | (20.06, | (18.98, | (-0.62, | 0.366  | (431.23, | (579.88, | (1.13,  | <0.001 | (148.81, | (104.35, | (-1.33, | <0.001 | (1.01,  | (0.18, | (-4.68, | <0.001 |
|                      | 24.98)  | 23.63)  | 0.24)   |        | 452.88)  | 604.05)  | 1.62)   |        | 161.59)  | 114.76)  | -0.84)  |        | 2.38)   | 0.93)  | -4.28)  |        |
|                      | 17.64   | 14.38   | -0.83   |        | 264.79   | 241.91   | -0.31   |        | 131.58   | 59.23    | -3.28   |        | 1.57    | 0.36   | -6.05   |        |
| Switzerland          | (15.44, | (12.47, | (-0.97, | <0.001 | (256.07, | (233.88, | (-0.47, | <0.001 | (125.47, | (55.30,  | (-3.56, | <0.001 | (0.97,  | (0.12, | (-6.42, | <0.001 |
|                      | 20.10)  | 16.53)  | -0.69)  |        | 273.76)  | 250.17)  | -0.15)  |        | 137.94)  | 63.41)   | -2.99)  |        | 2.45)   | 0.89)  | -5.67)  |        |
|                      | 59.38   | 42.10   | -1.52   |        | 643.70   | 564.76   | -0.56   |        | 857.17   | 421.20   | -2.92   |        | 12.78   | 5.60   | -3.41   |        |
| Syrian Arab Republic | (56.04, | (39.65, | (-1.74, | <0.001 | (632.51, | (555.66, | (-0.65, | <0.001 | (844.52, | (413.40, | (-3.36, | <0.001 | (11.26, | (4.73, | (-3.92, | <0.001 |
|                      | 62.88)  | 44.69)  | -1.29)  |        | 655.05)  | 574.00)  | -0.48)  |        | 869.98)  | 429.13)  | -2.47)  |        | 14.47)  | 6.60)  | -2.90)  |        |
| Taiwan (Province)    | 25.49   | 24.37   | -0.25   | <0.001 | 395.38   | 412.66   | 0.11    | 0.022  | 289.19   | 159.04   | -2.15   | <0.001 | 3.45    | 1.17   | -3.92   | <0.001 |

|                        |         |         |         |        |          |          |         |        |          |          |         |        |         |         |         |        |
|------------------------|---------|---------|---------|--------|----------|----------|---------|--------|----------|----------|---------|--------|---------|---------|---------|--------|
| of China)              | (24.04, | (22.85, | (-0.35, |        | (389.63, | (406.39, | (0.02,  |        | (284.28, | (155.21, | (-2.33, |        | (2.93,  | (0.88,  | (-4.17, |        |
|                        | 27.00)  | 25.97)  | -0.15)  |        | 401.20)  | 419.02)  | 0.20)   |        | 294.18)  | 162.96)  | -1.97)  |        | 4.03)   | 1.56)   | -3.66)  |        |
|                        | 31.79   | 28.21   | -0.31   |        | 335.30   | 329.72   | 0.03    |        | 363.44   | 261.02   | -1.95   |        | 5.25    | 3.42    | -2.47   |        |
| Tajikistan             | (28.25, | (25.89, | (-0.60, | 0.041  | (323.61, | (321.67, | (-0.11, | 0.632  | (350.95, | (253.82, | (-2.35, | <0.001 | (3.83,  | (2.64,  | (-2.95, | <0.001 |
|                        | 35.68)  | 30.69)  | -0.01)  |        | 347.33)  | 337.92)  | 0.18)   |        | 376.28)  | 268.38)  | -1.54)  |        | 7.06)   | 4.37)   | -1.99)  |        |
|                        | 26.08   | 25.37   | -0.50   |        | 387.65   | 376.14   | -0.19   |        | 251.39   | 232.92   | -0.63   |        | 2.95    | 2.61    | -0.92   |        |
| Thailand               | (25.19, | (24.50, | (-0.69, | <0.001 | (384.22, | (372.77, | (-0.30, | 0.001  | (248.61, | (230.27, | (-1.41, | 0.107  | (2.65,  | (2.34,  | (-2.01, | 0.100  |
|                        | 26.99)  | 26.27)  | -0.31)  |        | 391.11)  | 379.53)  | -0.09)  |        | 254.20)  | 235.59)  | 0.15)   |        | 3.27)   | 2.91)   | 0.19)   |        |
|                        | 45.79   | 34.98   | -1.14   |        | 512.67   | 468.50   | -0.28   |        | 386.37   | 416.00   | 0.33    |        | 4.91    | 5.53    | 0.52    |        |
| Timor-Leste            | (35.39, | (27.65, | (-1.24, | <0.001 | (476.33, | (440.69, | (-0.39, | <0.001 | (354.58, | (389.40, | (0.01,  | 0.043  | (1.94,  | (2.82,  | (0.10,  | 0.016  |
|                        | 58.46)  | 43.80)  | -1.03)  |        | 551.18)  | 497.73)  | -0.18)  |        | 420.37)  | 444.06)  | 0.65)   |        | 10.43)  | 9.90)   | 0.93)   |        |
|                        | 37.40   | 31.12   | -0.65   |        | 551.08   | 513.09   | -0.17   |        | 487.83   | 358.22   | -0.86   |        | 7.17    | 4.99    | -1.01   |        |
| Togo                   | (32.76, | (28.45, | (-0.72, | <0.001 | (533.20, | (502.12, | (-0.25, | <0.001 | (470.72, | (349.00, | (-0.99, | <0.001 | (5.21,  | (3.95,  | (-1.16, | <0.001 |
|                        | 42.55)  | 33.99)  | -0.57)  |        | 569.45)  | 524.25)  | -0.09)  |        | 505.43)  | 367.61)  | -0.74)  |        | 9.67)   | 6.22)   | -0.87)  |        |
|                        | 61.85   | 55.33   | -0.43   |        | 618.21   | 601.48   | -0.09   |        | 931.05   | 854.85   | -0.28   |        | 14.10   | 12.76   | -0.32   |        |
| Tokelau                | (0.00,  | (0.00,  |         |        |          |          |         |        |          |          |         |        | (0.00,  | (0.00,  |         |        |
|                        | 1813.98 | 2403.77 | (-0.46, | <0.001 | (54.17,  | (28.01,  | (-0.14, | 0.001  | (154.82, | (81.60,  | (-0.39, | <0.001 | 1729.37 | 2330.84 | (-0.44, | <0.001 |
|                        | )       | )       | -0.41)  |        | 2723.57) | 3296.66) | -0.04)  |        | 3197.14) | 3698.54) | -0.18)  |        | )       | )       | -0.20)  |        |
| Tonga                  | 50.19   | 42.91   | -0.64   |        | 593.64   | 569.05   | -0.11   |        | 398.35   | 362.33   | -0.38   |        | 4.84    | 4.23    | -0.55   |        |
|                        | (21.35, | (18.53, | (-0.81, | <0.001 | (478.17, | (465.63, | (-0.20, | 0.024  | (303.94, | (280.71, | (-0.53, | <0.001 | (0.03,  | (0.04,  | (-0.76, | <0.001 |
|                        | 102.23) | 85.20)  | -0.47)  |        | 730.13)  | 689.01)  | -0.02)  |        | 514.24)  | 460.67)  | -0.22)  |        | 37.34)  | 29.09)  | -0.34)  |        |
| Trinidad and<br>Tobago | 47.18   | 39.59   | -0.82   |        | 594.59   | 563.33   | -0.26   |        | 355.46   | 213.00   | -2.70   |        | 5.14    | 2.71    | -3.28   |        |
|                        | (38.90, | (32.40, | (-0.93, | <0.001 | (564.27, | (535.09, | (-0.34, | <0.001 | (332.04, | (195.70, | (-3.14, | <0.001 | (2.68,  | (1.11,  | (-3.82, | <0.001 |
|                        | 56.75)  | 48.05)  | -0.70)  |        | 626.16)  | 592.80)  | -0.19)  |        | 380.13)  | 231.54)  | -2.27)  |        | 8.99)   | 5.76)   | -2.74)  |        |
| Tunisia                | 32.82   | 33.58   | 0.08    |        | 312.67   | 375.52   | 0.25    |        | 304.06   | 204.33   | -1.37   |        | 4.39    | 2.48    | -1.89   |        |
|                        | (30.01, | (31.27, | (-0.00, | 0.061  | (303.91, | (367.75, | (0.10,  | 0.002  | (295.35, | (198.64, | (-1.45, | <0.001 | (3.39,  | (1.90,  | (-2.00, | <0.001 |
|                        | 35.82)  | 36.02)  | 0.16)   |        | 321.63)  | 383.41)  | 0.40)   |        | 312.98)  | 210.16)  | -1.29)  |        | 5.61)   | 3.21)   | -1.78)  |        |
| Turkey                 | 47.42   | 33.31   | -1.60   |        | 563.84   | 472.03   | -0.69   |        | 325.69   | 167.88   | -2.48   |        | 4.11    | 1.61    | -3.44   |        |
|                        | (46.15, | (32.45, | (-1.75, | <0.001 | (559.44, | (468.77, | (-0.74, | <0.001 | (322.35, | (165.94, | (-2.60, | <0.001 | (3.74,  | (1.42,  | (-3.63, | <0.001 |
|                        | 48.72)  | 34.19)  | -1.44)  |        | 568.27)  | 475.32)  | -0.63)  |        | 329.06)  | 169.85)  | -2.35)  |        | 4.51)   | 1.81)   | -3.26)  |        |
| Turkmenistan           | 32.19   | 38.35   | 0.76    |        | 404.01   | 453.09   | 0.56    |        | 388.15   | 475.33   | 0.95    |        | 5.38    | 6.60    | 0.97    |        |
|                        | (28.15, | (34.53, | (0.66,  | <0.001 | (389.35, | (439.70, | (0.49,  | <0.001 | (373.66, | (461.59, | (0.55,  | <0.001 | (3.78,  | (5.07,  | (0.48,  | <0.001 |
|                        | 36.68)  | 42.50)  | 0.86)   |        | 419.10)  | 466.80)  | 0.64)   |        | 403.08)  | 489.39)  | 1.35)   |        | 7.45)   | 8.45)   | 1.47)   |        |

|                                 |         |         |         |        |          |          |         |        |          |           |         |        |         |         |         |        |
|---------------------------------|---------|---------|---------|--------|----------|----------|---------|--------|----------|-----------|---------|--------|---------|---------|---------|--------|
|                                 | 76.88   | 56.10   | -1.30   |        | 657.69   | 580.12   | -0.51   |        | 1133.82  | 924.00    | -0.62   |        | 17.44   | 14.02   | -0.65   |        |
| Tuvalu                          | (5.36,  | (2.25,  | (-1.41, | <0.001 | (346.43, | (300.71, | (-0.58, | <0.001 | (708.76, | (558.04,  | (-0.67, | <0.001 | (0.00,  | (0.00,  | (-0.70, | <0.001 |
|                                 | 340.22) | 295.23) | -1.19)  |        | 1138.41) | 1019.51) | -0.43)  |        | 1724.68) | 1446.99)  | -0.58)  |        | 237.43) | 222.52) | -0.60)  |        |
|                                 | 27.26   | 18.99   | -1.78   |        | 542.38   | 506.96   | -0.30   |        | 291.27   | 243.73    | -1.73   |        | 3.83    | 3.04    | -2.23   |        |
| Uganda                          | (25.29, | (17.99, | (-2.01, | <0.001 | (533.88, | (501.87, | (-0.39, | <0.001 | (284.78, | (240.08,  | (-2.26, | <0.001 | (3.10,  | (2.63,  | (-2.92, | <0.001 |
|                                 | 29.36)  | 20.04)  | -1.56)  |        | 551.00)  | 512.09)  | -0.20)  |        | 297.89)  | 247.42)   | -1.20)  |        | 4.69)   | 3.49)   | -1.55)  |        |
|                                 | 33.03   | 36.38   | 0.45    |        | 540.24   | 645.69   | 0.70    |        | 229.35   | 311.51    | 0.88    |        | 2.12    | 3.25    | 1.09    |        |
| Ukraine                         | (31.91, | (35.02, | (0.28,  | <0.001 | (535.65, | (639.85, | (0.58,  | <0.001 | (226.38, | (307.56,  | (0.54,  | <0.001 | (1.85,  | (2.87,  | (0.53,  | <0.001 |
|                                 | 34.18)  | 37.79)  | 0.62)   |        | 544.85)  | 651.57)  | 0.81)   |        | 232.36)  | 315.51)   | 1.22)   |        | 2.43)   | 3.67)   | 1.66)   |        |
|                                 | 54.89   | 55.86   | 0.10    |        | 705.22   | 703.46   | 0.05    |        | 584.40   | 393.11    | -1.34   |        | 8.32    | 5.04    | -1.70   |        |
| United Arab<br>Emirates         | (46.76, | (51.70, | (-0.11, | 0.346  | (675.28, | (688.02, | (-0.03, | 0.249  | (556.90, | (382.22,  | (-2.01, | <0.001 | (5.34,  | (3.94,  | (-2.59, | 0.001  |
|                                 | 64.10)  | 60.34)  | 0.30)   |        | 736.21)  | 719.22)  | 0.13)   |        | 612.97)  | 404.31)   | -0.67)  |        | 12.47)  | 6.48)   | -0.80)  |        |
|                                 | 19.79   | 15.28   | -1.17   |        | 317.41   | 303.63   | -0.11   |        | 182.65   | 107.07    | -2.14   |        | 2.35    | 1.07    | -3.09   |        |
| United Kingdom                  | (18.95, | (14.56, | (-1.35, | <0.001 | (314.03, | (300.41, | (-0.28, | 0.218  | (180.09, | (105.18,  | (-2.31, | <0.001 | (2.06,  | (0.90,  | (-3.28, | <0.001 |
|                                 | 20.65)  | 16.03)  | -1.00)  |        | 320.83)  | 306.89)  | 0.07)   |        | 185.25)  | 108.99)   | -1.97)  |        | 2.66)   | 1.28)   | -2.90)  |        |
|                                 | 24.37   | 21.36   | -0.61   |        | 529.55   | 550.45   | 0.23    |        | 374.82   | 270.80    | -1.10   |        | 5.32    | 3.42    | -1.52   |        |
| United Republic of<br>Tanzania  | (22.90, | (20.48, | (-0.80, | <0.001 | (522.90, | (546.05, | (0.10,  | 0.001  | (369.00, | (267.63,  | (-1.35, | <0.001 | (4.64,  | (3.07,  | (-1.81, | <0.001 |
|                                 | 25.91)  | 22.27)  | -0.43)  |        | 536.26)  | 554.88)  | 0.35)   |        | 380.71)  | 274.00)   | -0.85)  |        | 6.09)   | 3.81)   | -1.22)  |        |
|                                 | 21.20   | 21.04   | -0.18   |        | 426.54   | 526.24   | 1.37    |        | 193.42   | 160.46    | -0.45   |        | 2.19    | 1.39    | -1.72   |        |
| United States of<br>America     | (20.81, | (20.66, | (-0.37, | 0.067  | (424.77, | (524.33, | (0.99,  | <0.001 | (192.24, | (159.41,  | (-0.56, | <0.001 | (2.07,  | (1.29,  | (-1.92, | <0.001 |
|                                 | 21.60)  | 21.42)  | 0.01)   |        | 428.31)  | 528.15)  | 1.76)   |        | 194.61)  | 161.51)   | -0.34)  |        | 2.32)   | 1.49)   | -1.53)  |        |
|                                 | 33.73   | 35.15   | 0.13    |        | 465.19   | 475.96   | 0.22    |        | 186.90   | 110.78    | -1.96   |        | 2.46    | 1.12    | -2.98   |        |
| United States<br>Virgin Islands | (13.67, | (12.58, | (0.00,  | 0.050  | (377.44, | (376.06, | (0.14,  | <0.001 | (133.21, | (66.04,   | (-2.08, | <0.001 | (0.00,  | (0.00,  | (-3.16, | <0.001 |
|                                 | 70.13)  | 79.53)  | 0.26)   |        | 567.82)  | 595.42)  | 0.30)   |        | 255.75)  | 175.89)   | -1.85)  |        | 23.97)  | 28.07)  | -2.80)  |        |
|                                 | 31.68   | 25.09   | -1.11   |        | 386.36   | 362.76   | -0.38   |        | 437.45   | 203.68    | -2.89   |        | 6.52    | 2.52    | -3.61   |        |
| Uruguay                         | (27.23, | (21.31, | (-1.25, | <0.001 | (370.40, | (347.94, | (-0.50, | <0.001 | (420.46, | (192.63,  | (-3.07, | <0.001 | (4.60,  | (1.44,  | (-3.82, | <0.001 |
|                                 | 36.65)  | 29.37)  | -0.97)  |        | 402.83)  | 378.07)  | -0.26)  |        | 454.95)  | 215.21)   | -2.71)  |        | 8.99)   | 4.13)   | -3.40)  |        |
|                                 | 37.92   | 31.22   | -0.68   |        | 412.36   | 417.45   | 0.09    |        | 342.20   | 296.03    | -0.85   |        | 4.54    | 3.71    | -1.16   |        |
| Uzbekistan                      | (36.01, | (29.93, | (-0.80, | <0.001 | (406.04, | (412.71, | (-0.00, | 0.053  | (336.41, | (292.05,  | (-1.17, | <0.001 | (3.89,  | (3.27,  | (-1.60, | <0.001 |
|                                 | 39.90)  | 32.55)  | -0.57)  |        | 418.76)  | 422.23)  | 0.17)   |        | 348.06)  | 300.06)   | -0.53)  |        | 5.27)   | 4.19)   | -0.72)  |        |
|                                 | 106.75  | 85.22   | -0.90   |        | 883.27   | 776.30   | -0.46   |        | 888.67   | 1101.57   | 0.10    |        | 12.37   | 16.41   | 0.15    |        |
| Vanuatu                         | (71.28, | (62.84, | (-0.98, | <0.001 | (774.06, | (705.10, | (-0.50, | <0.001 | (779.20, | (1016.49, | (-0.11, | 0.352  | (2.78,  | (7.55,  | (-0.09, | 0.207  |
|                                 | 154.50) | 113.33) | -0.82)  |        | 1004.21) | 853.02)  | -0.43)  |        | 1009.84) | ,         | 0.31)   |        | 35.87)  | 31.44)  | 0.40)   |        |



|                |         |         |         |        |          |          |         |        |          |          |         |        |        |        |         |        |
|----------------|---------|---------|---------|--------|----------|----------|---------|--------|----------|----------|---------|--------|--------|--------|---------|--------|
|                |         |         |         |        |          |          |         |        | 1192.14) |          |         |        |        |        |         |        |
| Venezuela      | 40.54   | 34.11   | -0.69   |        | 593.91   | 536.66   | -0.31   |        | 396.33   | 290.23   | -0.90   |        | 5.88   | 4.05   | -1.13   |        |
| (Bolivarian    | (38.54, | (32.60, | (-0.90, | <0.001 | (586.22, | (530.61, | (-0.46, | <0.001 | (390.03, | (285.77, | (-1.61, | 0.015  | (5.13, | (3.54, | (-1.94, | 0.009  |
| Republic of)   | 42.62)  | 35.67)  | -0.48)  |        | 601.67)  | 542.76)  | -0.17)  |        | 402.72)  | 294.73)  | -0.19)  |        | 6.72)  | 4.61)  | -0.31)  |        |
|                | 27.81   | 26.89   | -0.29   |        | 392.28   | 429.10   | 0.36    |        | 300.83   | 215.90   | -0.80   |        | 3.86   | 2.18   | -1.43   |        |
| Viet Nam       | (26.93, | (26.17, | (-0.57, | 0.041  | (388.96, | (426.25, | (0.22,  | <0.001 | (297.86, | (213.90, | (-0.96, | <0.001 | (3.52, | (1.99, | (-1.65, | <0.001 |
|                | 28.72)  | 27.62)  | -0.01)  |        | 395.63)  | 431.97)  | 0.51)   |        | 303.82)  | 217.92)  | -0.65)  |        | 4.22)  | 2.39)  | -1.20)  |        |
|                | 51.92   | 44.31   | -0.65   |        | 530.39   | 506.89   | -0.09   |        | 579.98   | 444.19   | -0.96   |        | 8.84   | 6.40   | -1.19   |        |
| Yemen          | (48.90, | (42.66, | (-0.69, | <0.001 | (520.70, | (501.30, | (-0.18, | 0.042  | (569.70, | (438.94, | (-1.10, | <0.001 | (7.60, | (5.78, | (-1.35, | <0.001 |
|                | 55.10)  | 46.01)  | -0.61)  |        | 540.23)  | 512.53)  | -0.00)  |        | 590.41)  | 449.50)  | -0.82)  |        | 10.23) | 7.07)  | -1.03)  |        |
|                | 39.28   | 22.30   | -2.60   |        | 585.15   | 538.63   | -0.37   |        | 494.22   | 327.57   | -1.82   |        | 7.29   | 4.47   | -2.14   |        |
| Zambia         | (35.78, | (20.74, | (-2.85, | <0.001 | (572.06, | (531.08, | (-0.47, | <0.001 | (481.66, | (321.48, | (-2.02, | <0.001 | (5.81, | (3.77, | (-2.38, | <0.001 |
|                | 43.07)  | 23.95)  | -2.35)  |        | 598.50)  | 546.27)  | -0.28)  |        | 507.05)  | 333.75)  | -1.63)  |        | 9.07)  | 5.26)  | -1.91)  |        |
|                | 18.13   | 28.11   | 1.75    |        | 459.22   | 491.82   | 0.35    |        | 189.42   | 264.90   | 2.72    |        | 2.16   | 3.39   | 3.63    |        |
| Zimbabwe       | (16.20, | (26.25, | (1.13,  | <0.001 | (449.47, | (484.06, | (0.23,  | <0.001 | (183.07, | (259.17, | (1.96,  | <0.001 | (1.52, | (2.76, | (2.50,  | <0.001 |
|                | 20.24)  | 30.07)  | 2.38)   |        | 469.15)  | 499.67)  | 0.47)   |        | 195.96)  | 270.73)  | 3.50)   |        | 2.99)  | 4.11)  | 4.78)   |        |
| <b>Men</b>     |         |         |         |        |          |          |         |        |          |          |         |        |        |        |         |        |
|                | 38.90   | 41.03   | 0.04    |        | 417.01   | 426.68   | 0.22    |        | 650.21   | 534.95   | -1.03   |        | 10.40  | 8.38   | -1.16   |        |
| Afghanistan    | (35.40, | (39.41, | (-0.12, | 0.631  | (405.65, | (421.56, | (0.13,  | <0.001 | (635.80, | (529.10, | (-1.34, | <0.001 | (8.62, | (7.65, | (-1.50, | <0.001 |
|                | 42.68)  | 42.70)  | 0.19)   |        | 428.64)  | 431.84)  | 0.31)   |        | 664.89)  | 540.85)  | -0.72)  |        | 12.47) | 9.16)  | -0.82)  |        |
|                | 23.35   | 25.70   | 0.38    |        | 210.81   | 215.92   | 0.12    |        | 382.59   | 420.69   | 0.31    |        | 5.72   | 6.36   | 0.35    |        |
| Albania        | (19.87, | (21.42, | (0.28,  | <0.001 | (199.97, | (203.03, | (0.06,  | <0.001 | (368.18, | (402.88, | (0.05,  | 0.023  | (4.08, | (4.34, | (0.05,  | 0.025  |
|                | 27.28)  | 30.61)  | 0.48)   |        | 222.11)  | 229.43)  | 0.19)   |        | 397.44)  | 439.10)  | 0.57)   |        | 7.84)  | 9.04)  | 0.65)   |        |
|                | 39.37   | 28.67   | -1.29   |        | 426.41   | 368.88   | -0.56   |        | 503.41   | 257.57   | -2.59   |        | 7.62   | 3.52   | -2.98   |        |
| Algeria        | (37.53, | (27.58, | (-1.34, | <0.001 | (420.35, | (364.92, | (-0.64, | <0.001 | (496.87, | (254.26, | (-2.77, | <0.001 | (6.83, | (3.14, | (-3.17, | <0.001 |
|                | 41.28)  | 29.80)  | -1.23)  |        | 432.55)  | 372.88)  | -0.48)  |        | 510.03)  | 260.92)  | -2.42)  |        | 8.49)  | 3.93)  | -2.78)  |        |
|                | 61.59   | 44.87   | -1.27   |        | 584.69   | 498.23   | -0.63   |        | 874.95   | 678.19   | -1.22   |        | 13.42  | 10.24  | -1.36   |        |
| American Samoa | (21.86, | (12.40, | (-1.33, | <0.001 | (439.11, | (363.67, | (-0.68, | <0.001 | (694.57, | (519.43, | (-1.49, | <0.001 | (0.60, | (0.19, | (-1.67, | <0.001 |
|                | 139.58) | 118.13) | -1.21)  |        | 764.97)  | 668.84)  | -0.57)  |        | 1089.67) | 872.67)  | -0.96)  |        | 68.99) | 65.80) | -1.05)  |        |
|                | 15.34   | 13.02   | -0.78   |        | 188.25   | 174.76   | -0.39   |        | 117.12   | 74.79    | -1.81   |        | 1.54   | 0.83   | -2.47   |        |
| Andorra        | (2.06,  | (1.29,  | (-0.88, | <0.001 | (123.40, | (112.09, | (-0.52, | <0.001 | (67.48,  | (36.55,  | (-1.92, | <0.001 | (0.00, | (0.00, | (-2.59, | <0.001 |
|                | 62.32)  | 57.89)  | -0.69)  |        | 280.32)  | 264.24)  | -0.26)  |        | 194.79)  | 141.19)  | -1.70)  |        | 41.55) | 38.83) | -2.34)  |        |
| Angola         | 37.84   | 27.22   | -1.39   | <0.001 | 378.66   | 348.57   | -0.31   | <0.001 | 521.00   | 376.54   | -1.07   | <0.001 | 8.08   | 5.70   | -1.15   | <0.001 |

|                     |         |         |         |        |          |          |         |        |          |          |         |        |         |         |         |        |
|---------------------|---------|---------|---------|--------|----------|----------|---------|--------|----------|----------|---------|--------|---------|---------|---------|--------|
|                     | (35.02, | (25.73, | (-1.49, |        | (369.72, | (343.27, | (-0.39, |        | (510.59, | (371.05, | (-1.20, |        | (6.82,  | (5.03,  | (-1.29, |        |
|                     | 40.83)  | 28.77)  | -1.30)  |        | 387.76)  | 353.93)  | -0.23)  |        | 531.57)  | 382.09)  | -0.94)  |        | 9.52)   | 6.43)   | -1.00)  |        |
|                     | 28.68   | 23.73   | -0.78   |        | 379.99   | 361.76   | -0.19   |        | 336.94   | 216.22   | -1.85   |        | 5.34    | 3.23    | -2.05   |        |
| Antigua and Barbuda | (6.60,  | (6.60,  | (-0.88, | <0.001 | (277.57, | (277.55, | (-0.24, | <0.001 | (240.27, | (152.60, | (-2.26, | <0.001 | (0.02,  | (0.01,  | (-2.51, | <0.001 |
|                     | 81.74)  | 61.12)  | -0.68)  |        | 509.37)  | 464.08)  | -0.14)  |        | 460.91)  | 298.13)  | -1.43)  |        | 44.97)  | 29.16)  | -1.58)  |        |
|                     | 29.90   | 18.95   | -1.95   |        | 244.74   | 194.53   | -0.99   |        | 573.56   | 230.68   | -3.72   |        | 9.28    | 3.42    | -4.10   |        |
| Argentina           | (28.52, | (18.05, | (-2.12, | <0.001 | (240.77, | (191.62, | (-1.09, | <0.001 | (567.49, | (227.51, | (-4.10, | <0.001 | (8.52,  | (3.04,  | (-4.50, | <0.001 |
|                     | 31.32)  | 19.89)  | -1.79)  |        | 248.75)  | 197.47)  | -0.89)  |        | 579.67)  | 233.89)  | -3.33)  |        | 10.08)  | 3.83)   | -3.70)  |        |
|                     | 35.71   | 24.84   | -1.22   |        | 302.64   | 246.24   | -0.77   |        | 251.30   | 157.64   | -2.62   |        | 3.44    | 1.92    | -3.13   |        |
| Armenia             | (31.44, | (20.98, | (-1.29, | <0.001 | (289.91, | (233.87, | (-0.81, | <0.001 | (239.70, | (147.68, | (-3.24, | <0.001 | (2.20,  | (0.98,  | (-3.94, | <0.001 |
|                     | 40.42)  | 29.31)  | -1.14)  |        | 315.81)  | 259.19)  | -0.73)  |        | 263.34)  | 168.17)  | -2.00)  |        | 5.14)   | 3.54)   | -2.32)  |        |
|                     | 16.28   | 13.10   | -0.65   |        | 185.61   | 160.65   | -0.36   |        | 134.25   | 66.32    | -2.55   |        | 1.80    | 0.69    | -3.48   |        |
| Australia           | (14.96, | (12.04, | (-0.72, | <0.001 | (181.11, | (156.90, | (-0.51, | <0.001 | (130.42, | (63.93,  | (-2.72, | <0.001 | (1.39,  | (0.47,  | (-3.73, | <0.001 |
|                     | 17.68)  | 14.23)  | -0.58)  |        | 190.20)  | 164.48)  | -0.22)  |        | 138.17)  | 68.79)   | -2.38)  |        | 2.31)   | 0.99)   | -3.22)  |        |
|                     | 20.18   | 15.11   | -1.26   |        | 249.90   | 209.23   | -0.76   |        | 184.00   | 66.32    | -4.25   |        | 2.58    | 0.62    | -5.84   |        |
| Austria             | (17.99, | (13.21, | (-1.37, | <0.001 | (242.04, | (202.01, | (-0.87, | <0.001 | (177.24, | (62.27,  | (-4.51, | <0.001 | (1.84,  | (0.29,  | (-6.17, | <0.001 |
|                     | 22.59)  | 17.24)  | -1.14)  |        | 257.97)  | 216.68)  | -0.65)  |        | 190.96)  | 70.59)   | -3.99)  |        | 3.55)   | 1.20)   | -5.51)  |        |
|                     | 36.36   | 29.01   | -0.68   |        | 299.33   | 264.29   | -0.35   |        | 335.98   | 229.10   | -2.05   |        | 4.97    | 3.15    | -2.32   |        |
| Azerbaijan          | (33.28, | (26.83, | (-0.77, | <0.001 | (290.36, | (257.69, | (-0.44, | <0.001 | (326.42, | (222.91, | (-2.69, | <0.001 | (3.86,  | (2.47,  | (-3.05, | <0.001 |
|                     | 39.66)  | 31.33)  | -0.59)  |        | 308.53)  | 271.04)  | -0.26)  |        | 345.77)  | 235.45)  | -1.41)  |        | 6.32)   | 3.99)   | -1.59)  |        |
|                     | 28.72   | 27.18   | 0.03    |        | 395.11   | 375.34   | -0.10   |        | 383.95   | 355.32   | -0.35   |        | 6.19    | 5.75    | -0.38   |        |
| Bahamas             | (16.07, | (16.63, | (-0.09, | 0.600  | (344.04, | (332.44, | (-0.17, | 0.019  | (332.81, | (313.73, | (-0.62, | 0.015  | (1.37,  | (1.66,  | (-0.70, | 0.018  |
|                     | 47.83)  | 42.06)  | 0.14)   |        | 452.05)  | 422.33)  | -0.02)  |        | 441.08)  | 400.99)  | -0.07)  |        | 18.14)  | 14.51)  | -0.07)  |        |
|                     | 27.37   | 24.99   | -0.51   |        | 391.26   | 359.01   | -0.32   |        | 248.72   | 163.93   | -1.77   |        | 3.28    | 1.94    | -2.32   |        |
| Bahrain             | (19.81, | (20.03, | (-0.64, | <0.001 | (360.96, | (339.12, | (-0.37, | <0.001 | (224.12, | (150.45, | (-2.11, | <0.001 | (1.07,  | (0.77,  | (-2.77, | <0.001 |
|                     | 37.66)  | 31.09)  | -0.39)  |        | 424.04)  | 379.98)  | -0.26)  |        | 275.89)  | 178.52)  | -1.42)  |        | 8.84)   | 4.47)   | -1.86)  |        |
|                     | 23.39   | 28.75   | 0.64    |        | 283.85   | 306.36   | 0.41    |        | 829.18   | 644.75   | -1.07   |        | 13.70   | 10.51   | -1.14   |        |
| Bangladesh          | (22.71, | (28.16, | (0.51,  | <0.001 | (281.48, | (304.44, | (0.31,  | <0.001 | (825.10, | (641.96, | (-1.34, | <0.001 | (13.18, | (10.16, | (-1.43, | <0.001 |
|                     | 24.09)  | 29.35)  | 0.77)   |        | 286.23)  | 308.28)  | 0.52)   |        | 833.27)  | 647.55)  | -0.79)  |        | 14.24)  | 10.87)  | -0.85)  |        |
|                     | 30.04   | 24.87   | -0.81   |        | 418.42   | 395.19   | -0.37   |        | 335.91   | 210.21   | -2.29   |        | 5.30    | 3.10    | -2.51   |        |
| Barbados            | (17.16, | (13.08, | (-0.92, | <0.001 | (365.43, | (341.88, | (-0.45, | <0.001 | (288.54, | (172.04, | (-2.64, | <0.001 | (1.02,  | (0.25,  | (-2.90, | <0.001 |
|                     | 48.90)  | 43.22)  | -0.69)  |        | 477.03)  | 454.64)  | -0.29)  |        | 388.94)  | 254.54)  | -1.94)  |        | 16.13)  | 13.41)  | -2.11)  |        |
| Belarus             | 36.98   | 30.98   | -0.12   | 0.450  | 284.90   | 260.12   | -0.08   | 0.219  | 351.80   | 282.02   | -1.04   | 0.013  | 5.33    | 4.18    | -1.12   | 0.021  |

|                   |         |         |         |        |          |          |         |        |          |          |         |        |         |        |         |        |
|-------------------|---------|---------|---------|--------|----------|----------|---------|--------|----------|----------|---------|--------|---------|--------|---------|--------|
|                   | (34.41, | (28.41, | (-0.46, |        | (277.69, | (252.59, | (-0.22, |        | (343.79, | (274.31, | (-1.84, |        | (4.39,  | (3.30, | (-2.04, |        |
|                   | 39.70)  | 33.76)  | 0.21)   |        | 292.27)  | 267.85)  | 0.05)   |        | 359.96)  | 289.94)  | -0.24)  |        | 6.43)   | 5.27)  | -0.19)  |        |
|                   | 16.02   | 12.11   | -1.26   |        | 191.12   | 182.37   | -0.07   |        | 229.63   | 78.38    | -3.84   |        | 3.42    | 0.88   | -4.91   |        |
| Belgium           | (14.29, | (10.57, | (-1.41, | <0.001 | (185.05, | (176.26, | (-0.21, | 0.320  | (222.94, | (74.39,  | (-4.11, | <0.001 | (2.65,  | (0.51, | (-5.19, | <0.001 |
|                   | 17.90)  | 13.83)  | -1.12)  |        | 197.35)  | 188.66)  | 0.07)   |        | 236.48)  | 82.54)   | -3.57)  |        | 4.36)   | 1.44)  | -4.64)  |        |
|                   | 23.39   | 24.99   | 0.17    |        | 349.79   | 366.87   | 0.16    |        | 242.47   | 280.73   | -0.75   |        | 3.62    | 4.34   | -0.85   |        |
| Belize            | (9.62,  | (15.35, | (0.06,  | 0.004  | (288.50, | (326.98, | (0.12,  | <0.001 | (192.06, | (245.68, | (-1.21, | 0.003  | (0.14,  | (1.06, | (-1.36, | 0.002  |
|                   | 48.76)  | 38.58)  | 0.28)   |        | 421.22)  | 410.43)  | 0.19)   |        | 303.08)  | 319.49)  | -0.28)  |        | 20.36)  | 11.97) | -0.34)  |        |
|                   | 40.04   | 32.85   | -0.79   |        | 457.03   | 423.29   | -0.17   |        | 443.54   | 370.49   | -0.79   |        | 6.75    | 5.52   | -0.90   |        |
| Benin             | (35.42, | (30.39, | (-0.83, | <0.001 | (441.18, | (414.44, | (-0.30, | 0.007  | (427.83, | (362.15, | (-0.92, | <0.001 | (4.92,  | (4.53, | (-1.04, | <0.001 |
|                   | 45.12)  | 35.46)  | -0.75)  |        | 473.34)  | 432.30)  | -0.05)  |        | 459.71)  | 378.98)  | -0.67)  |        | 9.05)   | 6.67)  | -0.75)  |        |
|                   | 25.12   | 21.35   | -0.69   |        | 382.85   | 355.25   | -0.26   |        | 193.43   | 95.48    | -2.69   |        | 2.78    | 1.14   | -3.54   |        |
| Bermuda           | (5.86,  | (2.71,  | (-0.82, | <0.001 | (284.09, | (244.01, | (-0.30, | <0.001 | (125.92, | (43.60,  | (-2.94, | <0.001 | (0.00,  | (0.00, | (-3.85, | <0.001 |
|                   | 77.26)  | 85.59)  | -0.57)  |        | 509.09)  | 504.43)  | -0.21)  |        | 289.10)  | 187.81)  | -2.45)  |        | 44.26)  | 54.08) | -3.22)  |        |
|                   | 24.58   | 20.12   | -0.84   |        | 286.26   | 268.59   | -0.16   |        | 258.90   | 172.17   | -1.65   |        | 3.81    | 2.27   | -2.05   |        |
| Bhutan            | (16.35, | (14.17, | (-0.92, | <0.001 | (256.48, | (245.50, | (-0.28, | 0.018  | (230.20, | (153.76, | (-1.75, | <0.001 | (1.08,  | (0.64, | (-2.18, | <0.001 |
|                   | 35.80)  | 27.82)  | -0.76)  |        | 318.81)  | 293.35)  | -0.03)  |        | 290.43)  | 192.26)  | -1.54)  |        | 9.92)   | 5.86)  | -1.92)  |        |
| Bolivia           | 42.87   | 30.87   | -1.33   |        | 452.44   | 399.99   | -0.42   |        | 571.02   | 296.06   | -2.32   |        | 9.03    | 4.39   | -2.53   |        |
| (Plurinational    | (39.10, | (28.68, | (-1.48, | <0.001 | (439.94, | (391.97, | (-0.50, | <0.001 | (557.14, | (289.20, | (-2.40, | <0.001 | (7.34,  | (3.59, | (-2.60, | <0.001 |
| State of)         | 46.92)  | 33.20)  | -1.17)  |        | 465.21)  | 408.14)  | -0.34)  |        | 585.17)  | 303.05)  | -2.24)  |        | 10.99)  | 5.33)  | -2.46)  |        |
|                   | 32.89   | 33.80   | 0.35    |        | 275.61   | 290.07   | 0.29    |        | 357.14   | 246.59   | -2.00   |        | 5.33    | 3.28   | -2.58   |        |
| Bosnia and        | (29.45, | (29.12, | (0.25,  | <0.001 | (265.48, | (276.15, | (0.25,  | <0.001 | (345.59, | (233.64, | (-2.38, | <0.001 | (4.00,  | (1.95, | (-3.00, | <0.001 |
| Herzegovina       | 36.63)  | 39.06)  | 0.46)   |        | 286.03)  | 304.56)  | 0.34)   |        | 368.99)  | 260.13)  | -1.62)  |        | 6.97)   | 5.24)  | -2.15)  |        |
|                   | 45.45   | 26.11   | -2.86   |        | 455.80   | 395.68   | -0.79   |        | 514.96   | 347.25   | -3.08   |        | 7.91    | 5.15   | -3.40   |        |
| Botswana          | (36.50, | (21.96, | (-3.39, | <0.001 | (426.82, | (378.96, | (-0.94, | <0.001 | (484.20, | (331.61, | (-3.87, | <0.001 | (4.49,  | (3.41, | (-4.27, | <0.001 |
|                   | 56.03)  | 30.83)  | -2.32)  |        | 486.36)  | 412.97)  | -0.64)  |        | 547.27)  | 363.46)  | -2.28)  |        | 13.06)  | 7.48)  | -2.52)  |        |
|                   | 47.68   | 25.71   | -2.51   |        | 491.75   | 378.45   | -1.08   |        | 635.81   | 233.46   | -3.55   |        | 10.59   | 3.52   | -3.92   |        |
| Brazil            | (46.87, | (25.24, | (-2.79, | <0.001 | (489.20, | (376.63, | (-1.31, | <0.001 | (632.87, | (232.04, | (-3.83, | <0.001 | (10.21, | (3.34, | (-4.20, | <0.001 |
|                   | 48.49)  | 26.19)  | -2.23)  |        | 494.32)  | 380.28)  | -0.85)  |        | 638.76)  | 234.89)  | -3.27)  |        | 10.98)  | 3.69)  | -3.64)  |        |
|                   | 35.59   | 21.21   | -2.17   |        | 283.65   | 236.45   | -0.77   |        | 437.87   | 167.19   | -4.34   |        | 6.74    | 2.25   | -5.01   |        |
| Brunei Darussalam | (22.71, | (13.68, | (-2.38, | <0.001 | (244.60, | (209.12, | (-0.95, | <0.001 | (388.93, | (144.51, | (-4.78, | <0.001 | (2.01,  | (0.40, | (-5.49, | <0.001 |
|                   | 53.48)  | 31.79)  | -1.96)  |        | 327.44)  | 266.66)  | -0.58)  |        | 491.51)  | 192.74)  | -3.91)  |        | 16.94)  | 7.68)  | -4.52)  |        |
| Bulgaria          | 41.15   | 31.62   | -1.04   | <0.001 | 324.26   | 290.61   | -0.42   | <0.001 | 636.03   | 402.28   | -2.30   | <0.001 | 10.16   | 6.16   | -2.54   | <0.001 |

|                          |         |         |         |        |          |          |         |        |          |          |         |        |         |        |         |        |
|--------------------------|---------|---------|---------|--------|----------|----------|---------|--------|----------|----------|---------|--------|---------|--------|---------|--------|
|                          | (38.04, | (28.45, | (-1.13, |        | (315.38, | (280.78, | (-0.54, |        | (623.58, | (390.70, | (-2.57, |        | (8.65,  | (4.82, | (-2.84, |        |
|                          | 44.47)  | 35.10)  | -0.96)  |        | 333.33)  | 300.75)  | -0.30)  |        | 648.68)  | 414.15)  | -2.03)  |        | 11.87)  | 7.81)  | -2.23)  |        |
|                          | 27.82   | 27.32   | -0.05   |        | 347.39   | 339.95   | 0.01    |        | 339.03   | 353.53   | 0.19    |        | 5.13    | 5.37   | 0.20    |        |
| Burkina Faso             | (24.91, | (25.62, | (-0.14, | 0.291  | (336.93, | (333.91, | (-0.09, | 0.877  | (328.61, | (347.35, | (0.05,  | 0.008  | (3.91,  | (4.62, | (0.05,  | 0.011  |
|                          | 31.01)  | 29.11)  | 0.04)   |        | 358.10)  | 346.07)  | 0.10)   |        | 349.71)  | 359.81)  | 0.33)   |        | 6.63)   | 6.20)  | 0.35)   |        |
|                          | 53.91   | 27.83   | -2.66   |        | 489.93   | 389.13   | -0.83   |        | 909.18   | 489.33   | -2.46   |        | 14.40   | 7.47   | -2.60   |        |
| Burundi                  | (49.19, | (25.60, | (-2.95, | <0.001 | (475.63, | (380.73, | (-0.98, | <0.001 | (889.86, | (479.94, | (-2.75, | <0.001 | (12.04, | (6.35, | (-2.91, | <0.001 |
|                          | 58.98)  | 30.20)  | -2.37)  |        | 504.58)  | 397.67)  | -0.68)  |        | 928.84)  | 498.87)  | -2.16)  |        | 17.12)  | 8.75)  | -2.30)  |        |
|                          | 45.54   | 33.26   | -1.18   |        | 480.09   | 436.25   | -0.25   |        | 656.78   | 308.94   | -2.28   |        | 10.48   | 4.33   | -2.58   |        |
| Cabo Verde               | (27.75, | (24.11, | (-1.25, | <0.001 | (417.89, | (401.15, | (-0.30, | <0.001 | (582.57, | (279.51, | (-2.46, | <0.001 | (3.07,  | (1.53, | (-2.82, | <0.001 |
|                          | 72.05)  | 44.87)  | -1.10)  |        | 550.19)  | 473.71)  | -0.20)  |        | 738.95)  | 340.74)  | -2.10)  |        | 27.81)  | 9.84)  | -2.34)  |        |
|                          | 38.03   | 30.05   | -0.91   |        | 331.70   | 315.85   | -0.10   |        | 537.35   | 350.96   | -1.58   |        | 8.41    | 5.11   | -1.83   |        |
| Cambodia                 | (34.90, | (28.26, | (-0.96, | <0.001 | (322.48, | (309.99, | (-0.25, | 0.157  | (525.42, | (344.76, | (-1.67, | <0.001 | (6.95,  | (4.39, | (-1.95, | <0.001 |
|                          | 41.39)  | 31.93)  | -0.85)  |        | 341.13)  | 321.78)  | 0.04)   |        | 549.50)  | 357.24)  | -1.48)  |        | 10.09)  | 5.93)  | -1.71)  |        |
|                          | 35.06   | 35.70   | -0.18   |        | 393.25   | 402.65   | 0.04    |        | 470.92   | 468.59   | -0.29   |        | 7.29    | 7.23   | -0.33   |        |
| Cameroon                 | (32.19, | (34.10, | (-0.47, | 0.229  | (383.50, | (397.29, | (-0.05, | 0.429  | (460.23, | (462.79, | (-0.55, | 0.028  | (6.01,  | (6.52, | (-0.61, | 0.020  |
|                          | 38.12)  | 37.35)  | 0.12)   |        | 403.20)  | 408.07)  | 0.12)   |        | 481.81)  | 474.45)  | -0.03)  |        | 8.79)   | 8.00)  | -0.06)  |        |
|                          | 13.34   | 11.41   | -0.60   |        | 366.95   | 315.04   | -0.41   |        | 154.17   | 89.00    | -1.84   |        | 1.80    | 0.77   | -2.86   |        |
| Canada                   | (12.42, | (10.57, | (-0.75, | <0.001 | (362.00, | (310.53, | (-0.76, | 0.023  | (150.99, | (86.63,  | (-2.06, | <0.001 | (1.47,  | (0.57, | (-3.13, | <0.001 |
|                          | 14.32)  | 12.31)  | -0.45)  |        | 371.96)  | 319.60)  | -0.06)  |        | 157.40)  | 91.42)   | -1.62)  |        | 2.18)   | 1.03)  | -2.59)  |        |
|                          | 45.11   | 40.75   | -0.49   |        | 384.48   | 358.34   | -0.25   |        | 655.63   | 575.33   | -0.60   |        | 10.35   | 9.08   | -0.61   |        |
| Central African Republic | (38.94, | (36.57, | (-0.54, | <0.001 | (366.43, | (345.98, | (-0.30, | <0.001 | (632.27, | (559.76, | (-0.73, | <0.001 | (7.57,  | (7.20, | (-0.75, | <0.001 |
|                          | 52.02)  | 45.29)  | -0.43)  |        | 403.25)  | 371.05)  | -0.19)  |        | 679.68)  | 591.25)  | -0.46)  |        | 13.88)  | 11.32) | -0.47)  |        |
|                          | 36.60   | 36.36   | -0.18   |        | 399.96   | 410.75   | 0.12    |        | 484.29   | 483.07   | -0.12   |        | 7.48    | 7.44   | -0.16   |        |
| Chad                     | (32.63, | (33.89, | (-0.34, | 0.035  | (386.60, | (402.41, | (0.07,  | <0.001 | (469.62, | (474.05, | (-0.33, | 0.216  | (5.74,  | (6.34, | (-0.37, | 0.150  |
|                          | 40.95)  | 38.97)  | -0.01)  |        | 413.67)  | 419.22)  | 0.17)   |        | 499.33)  | 492.24)  | 0.08)   |        | 9.61)   | 8.68)  | 0.06)   |        |
|                          | 20.61   | 17.64   | -0.34   |        | 225.00   | 205.82   | -0.14   |        | 251.19   | 150.95   | -1.42   |        | 3.71    | 2.05   | -1.64   |        |
| Chile                    | (18.93, | (16.28, | (-0.57, | 0.006  | (219.35, | (201.11, | (-0.30, | 0.107  | (245.25, | (146.91, | (-1.57, | <0.001 | (3.02,  | (1.60, | (-1.82, | <0.001 |
|                          | 22.40)  | 19.10)  | -0.11)  |        | 230.76)  | 210.63)  | 0.03)   |        | 257.24)  | 155.09)  | -1.27)  |        | 4.52)   | 2.59)  | -1.46)  |        |
|                          | 29.38   | 26.99   | -0.71   |        | 299.64   | 268.31   | -0.51   |        | 565.58   | 428.15   | -0.98   |        | 8.81    | 6.58   | -1.01   |        |
| China                    | (29.18, | (26.79, | (-0.88, | <0.001 | (298.99, | (267.69, | (-0.77, | <0.001 | (564.68, | (427.37, | (-1.13, | <0.001 | (8.70,  | (6.49, | (-1.16, | <0.001 |
|                          | 29.59)  | 27.19)  | -0.54)  |        | 300.30)  | 268.93)  | -0.26)  |        | 566.48)  | 428.93)  | -0.82)  |        | 8.93)   | 6.68)  | -0.86)  |        |
|                          | 26.09   | 18.78   | -1.35   | <0.001 | 353.22   | 310.44   | -0.40   | <0.001 | 326.18   | 166.38   | -2.31   | <0.001 | 5.07    | 2.39   | -2.57   | <0.001 |

|                   |         |         |         |        |          |          |         |        |          |          |         |        |         |         |         |        |
|-------------------|---------|---------|---------|--------|----------|----------|---------|--------|----------|----------|---------|--------|---------|---------|---------|--------|
|                   | (24.84, | (17.91, | (-1.55, |        | (348.64, | (306.90, | (-0.53, |        | (321.77, | (163.79, | (-2.58, | (4.53, | (2.09,  | (-2.86, |         |        |
|                   | 27.38)  | 19.67)  | -1.15)  |        | 357.86)  | 314.00)  | -0.27)  |        | 330.65)  | 168.99)  | -2.05)  | 5.67)  | 2.73)   | -2.29)  |         |        |
|                   | 49.92   | 27.67   | -2.32   |        | 478.75   | 388.68   | -0.75   |        | 510.47   | 323.06   | -2.13   | 7.72   | 4.68    | -2.29   |         |        |
| Comoros           | (34.42, | (19.69, | (-2.59, | <0.001 | (428.37, | (357.03, | (-0.89, | <0.001 | (458.91, | (294.30, | (-2.79, | <0.001 | (2.60,  | (1.83,  | (-3.01, | <0.001 |
|                   | 70.44)  | 37.87)  | -2.06)  |        | 533.83)  | 422.46)  | -0.62)  |        | 566.67)  | 353.94)  | -1.46)  |        | 18.35)  | 9.93)   | -1.56)  |        |
|                   | 45.79   | 23.10   | -2.79   |        | 438.32   | 344.52   | -0.88   |        | 699.20   | 309.34   | -3.16   |        | 11.09   | 4.55    | -3.44   |        |
| Congo             | (39.21, | (20.21, | (-3.06, | <0.001 | (417.82, | (333.11, | (-1.03, | <0.001 | (673.39, | (298.51, | (-3.49, | <0.001 | (8.02,  | (3.32,  | (-3.79, | <0.001 |
|                   | 53.23)  | 26.29)  | -2.51)  |        | 459.63)  | 356.23)  | -0.74)  |        | 725.80)  | 320.46)  | -2.82)  |        | 15.02)  | 6.09)   | -3.09)  |        |
|                   | 54.29   | 52.79   | -0.26   |        | 540.85   | 524.73   | -0.17   |        | 764.59   | 594.56   | -0.83   |        | 11.52   | 8.71    | -0.94   |        |
| Cook Islands      | (6.49,  | (3.33,  | (-0.44, | 0.007  | (329.07, | (287.19, | (-0.24, | <0.001 | (508.96, | (339.06, | (-1.22, | <0.001 | (0.00,  | (0.00,  | (-1.42, | <0.001 |
|                   | 210.80) | 238.66) | -0.08)  |        | 846.07)  | 882.27)  | -0.09)  |        | 1111.74) | 969.60)  | -0.43)  |        | 141.64) | 161.13) | -0.47)  |        |
|                   | 22.09   | 20.29   | -0.29   |        | 339.03   | 330.41   | -0.03   |        | 190.32   | 144.96   | -1.03   |        | 2.80    | 2.01    | -1.27   |        |
| Costa Rica        | (18.49, | (17.52, | (-0.46, | 0.001  | (324.54, | (318.89, | (-0.08, | 0.234  | (179.42, | (137.38, | (-1.47, | <0.001 | (1.61,  | (1.21,  | (-1.80, | <0.001 |
|                   | 26.23)  | 23.40)  | -0.12)  |        | 354.03)  | 342.25)  | 0.02)   |        | 201.75)  | 152.86)  | -0.59)  |        | 4.55)   | 3.16)   | -0.74)  |        |
|                   | 49.38   | 37.21   | -1.29   |        | 506.12   | 442.15   | -0.57   |        | 614.63   | 449.27   | -1.56   |        | 9.48    | 6.78    | -1.67   |        |
| Cote d'Ivoire     | (46.45, | (35.57, | (-1.44, | <0.001 | (496.64, | (436.45, | (-0.64, | <0.001 | (604.26, | (443.53, | (-1.82, | <0.001 | (8.22,  | (6.08,  | (-1.95, | <0.001 |
|                   | 52.47)  | 38.91)  | -1.14)  |        | 515.75)  | 447.91)  | -0.50)  |        | 625.15)  | 455.07)  | -1.30)  |        | 10.89)  | 7.53)   | -1.39)  |        |
|                   | 25.17   | 17.36   | -1.70   |        | 231.03   | 183.62   | -1.04   |        | 341.69   | 124.66   | -4.06   |        | 5.29    | 1.51    | -4.99   |        |
| Croatia           | (22.14, | (14.43, | (-1.95, | <0.001 | (221.66, | (173.88, | (-1.22, | <0.001 | (330.31, | (116.61, | (-4.31, | <0.001 | (3.96,  | (0.76,  | (-5.29, | <0.001 |
|                   | 28.54)  | 20.78)  | -1.45)  |        | 240.71)  | 193.82)  | -0.86)  |        | 353.39)  | 133.18)  | -3.81)  |        | 6.94)   | 2.81)   | -4.70)  |        |
|                   | 29.65   | 23.90   | -0.83   |        | 398.83   | 350.56   | -0.45   |        | 298.30   | 161.39   | -2.38   |        | 4.65    | 2.32    | -2.71   |        |
| Cuba              | (27.40, | (21.76, | (-0.93, | <0.001 | (390.62, | (342.17, | (-0.54, | <0.001 | (291.10, | (155.75, | (-2.62, | <0.001 | (3.78,  | (1.69,  | (-2.98, | <0.001 |
|                   | 32.04)  | 26.21)  | -0.74)  |        | 407.17)  | 359.11)  | -0.36)  |        | 305.64)  | 167.20)  | -2.14)  |        | 5.66)   | 3.12)   | -2.44)  |        |
|                   | 14.66   | 13.54   | -0.50   |        | 187.45   | 199.68   | 0.26    |        | 121.94   | 82.32    | -2.23   |        | 1.60    | 0.91    | -3.07   |        |
| Cyprus            | (9.32,  | (9.48,  | (-0.60, | <0.001 | (166.82, | (183.09, | (0.14,  | <0.001 | (105.34, | (71.71,  | (-2.62, | <0.001 | (0.27,  | (0.15,  | (-3.64, | <0.001 |
|                   | 22.03)  | 19.17)  | -0.41)  |        | 210.00)  | 217.67)  | 0.38)   |        | 140.48)  | 94.36)   | -1.85)  |        | 5.23)   | 3.67)   | -2.50)  |        |
|                   | 28.16   | 20.55   | -1.40   |        | 259.42   | 208.55   | -0.83   |        | 284.61   | 101.47   | -3.97   |        | 4.13    | 1.03    | -5.26   |        |
| Czechia           | (25.87, | (18.45, | (-1.63, | <0.001 | (252.33, | (201.85, | (-0.97, | <0.001 | (277.19, | (96.76,  | (-4.20, | <0.001 | (3.29,  | (0.62,  | (-5.49, | <0.001 |
|                   | 30.62)  | 22.87)  | -1.17)  |        | 266.66)  | 215.45)  | -0.68)  |        | 292.19)  | 106.37)  | -3.75)  |        | 5.14)   | 1.67)   | -5.04)  |        |
| Democratic        | 47.57   | 46.75   | -0.09   |        | 357.81   | 354.99   | -0.01   |        | 707.93   | 681.32   | -0.05   |        | 11.11   | 10.63   | -0.08   |        |
| People's Republic | (45.39, | (44.97, | (-0.22, | 0.143  | (351.80, | (350.04, | (-0.04, | 0.734  | (699.47, | (674.44, | (-0.14, | 0.265  | (10.07, | (9.79,  | (-0.17, | 0.116  |
| of Korea          | 49.82)  | 48.60)  | 0.03)   |        | 363.90)  | 359.99)  | 0.03)   |        | 716.48)  | 688.26)  | 0.04)   |        | 12.24)  | 11.53)  | 0.02)   |        |
| Democratic        | 28.72   | 23.72   | -0.77   | <0.001 | 316.85   | 287.46   | -0.36   | <0.001 | 405.40   | 317.98   | -0.81   | <0.001 | 6.26    | 4.82    | -0.86   | <0.001 |

|                       |                |                |                |        |                  |                  |                |        |                    |                  |                |        |                |                |                |
|-----------------------|----------------|----------------|----------------|--------|------------------|------------------|----------------|--------|--------------------|------------------|----------------|--------|----------------|----------------|----------------|
| Republic of the Congo | (27.38, 30.11) | (22.96, 24.51) | (-0.84, -0.70) |        | (312.42, 321.33) | (284.82, 290.11) | (-0.45, -0.27) |        | (400.40, 410.45)   | (315.20, 320.77) | (-0.89, -0.72) |        | (5.65, 6.93)   | (4.48, 5.18)   | (-0.95, -0.77) |
|                       | 17.72          | 12.20          | -1.40          |        | 232.54           | 196.54           | -0.59          |        | 187.26             | 71.57            | -3.77          |        | 2.73           | 0.75           | -4.98          |
| Denmark               | (15.21, 20.55) | (10.05, 14.68) | (-1.54, -1.27) | <0.001 | (223.18, 242.22) | (187.63, 205.79) | (-0.67, -0.51) | <0.001 | (178.90, 195.92)   | (66.25, 77.23)   | (-4.02, -3.52) | <0.001 | (1.81, 3.98)   | (0.30, 1.58)   | (-5.33, -4.62) |
|                       | 40.16          | 29.19          | -1.25          |        | 439.92           | 410.10           | -0.19          |        | 525.30             | 392.99           | -1.14          |        | 8.04           | 5.82           | -1.26          |
| Djibouti              | (28.21, 55.77) | (22.99, 36.55) | (-1.39, -1.10) | <0.001 | (398.39, 484.89) | (385.88, 435.46) | (-0.30, -0.08) | 0.001  | (480.21, 573.78)   | (369.30, 417.82) | (-1.29, -0.99) | <0.001 | (3.35, 16.68)  | (3.27, 9.59)   | (-1.42, -1.10) |
|                       | 26.86          | 24.00          | -0.48          |        | 380.65           | 369.84           | -0.04          |        | 263.63             | 198.09           | -1.54          |        | 4.07           | 2.94           | -1.79          |
| Dominica              | (6.59, 74.52)  | (5.19, 68.96)  | (-0.54, -0.41) | <0.001 | (284.85, 500.00) | (273.14, 489.88) | (-0.10, 0.02)  | 0.237  | (183.92, 367.61)   | (129.25, 290.71) | (-1.80, -1.28) | <0.001 | (0.01, 38.91)  | (0.00, 34.58)  | (-2.12, -1.46) |
|                       | 31.19          | 32.34          | 0.04           |        | 367.14           | 376.87           | 0.12           |        | 413.77             | 387.65           | -0.11          |        | 6.66           | 6.25           | -0.09          |
| Dominican Republic    | (28.17, 34.47) | (30.02, 34.79) | (-0.03, 0.10)  | 0.254  | (356.82, 377.70) | (368.89, 384.99) | (0.06, 0.19)   | <0.001 | (402.73, 425.06)   | (379.54, 395.89) | (-0.54, 0.33)  | 0.625  | (5.31, 8.26)   | (5.25, 7.38)   | (-0.54, 0.37)  |
|                       | 40.17          | 30.63          | -1.02          |        | 455.98           | 417.04           | -0.31          |        | 587.88             | 370.39           | -1.87          |        | 9.28           | 5.65           | -2.01          |
| Ecuador               | (37.33, 43.17) | (28.83, 32.53) | (-1.13, -0.90) | <0.001 | (446.25, 465.87) | (410.29, 423.87) | (-0.34, -0.29) | <0.001 | (576.98, 598.95)   | (364.07, 376.80) | (-2.12, -1.61) | <0.001 | (7.94, 10.78)  | (4.89, 6.50)   | (-2.28, -1.74) |
|                       | 32.16          | 32.04          | 0.15           |        | 380.03           | 399.76           | 0.41           |        | 1184.40            | 818.94           | -0.71          |        | 18.47          | 12.37          | -0.83          |
| Egypt                 | (31.07, 33.29) | (31.27, 32.82) | (0.02, 0.28)   | 0.026  | (376.27, 383.82) | (397.05, 402.49) | (0.30, 0.53)   | <0.001 | (1177.96, 1190.86) | (815.08, 822.82) | (-1.06, -0.36) | <0.001 | (17.67, 19.30) | (11.90, 12.86) | (-1.20, -0.47) |
|                       | 26.01          | 19.41          | -1.24          |        | 316.32           | 300.51           | -0.20          |        | 811.96             | 249.04           | -4.59          |        | 13.09          | 3.80           | -4.88          |
| El Salvador           | (22.71, 29.67) | (16.91, 22.19) | (-1.51, -0.97) | <0.001 | (304.60, 328.42) | (290.51, 310.77) | (-0.29, -0.10) | <0.001 | (793.46, 830.81)   | (239.91, 258.45) | (-5.53, -3.64) | <0.001 | (10.81, 15.74) | (2.74, 5.16)   | (-5.87, -3.88) |
|                       | 45.83          | 20.87          | -2.95          |        | 409.91           | 332.87           | -0.73          |        | 634.22             | 216.26           | -4.13          |        | 9.96           | 2.96           | -4.68          |
| Equatorial Guinea     | (29.99, 67.41) | (15.96, 26.96) | (-3.32, -2.57) | <0.001 | (359.74, 465.45) | (312.54, 354.30) | (-0.91, -0.56) | <0.001 | (572.29, 701.40)   | (199.99, 233.64) | (-4.59, -3.67) | <0.001 | (3.62, 22.40)  | (1.33, 5.90)   | (-5.15, -4.19) |
|                       | 53.43          | 28.59          | -2.50          |        | 426.90           | 353.77           | -0.75          |        | 758.12             | 542.99           | -1.50          |        | 12.06          | 8.53           | -1.56          |
| Eritrea               | (47.05, 60.49) | (25.77, 31.65) | (-2.64, -2.36) | <0.001 | (408.79, 445.66) | (343.76, 364.01) | (-0.86, -0.65) | <0.001 | (734.22, 782.65)   | (530.58, 555.62) | (-1.65, -1.34) | <0.001 | (9.19, 15.62)  | (7.03, 10.28)  | (-1.72, -1.40) |
|                       | 37.60          | 25.34          | -1.86          |        | 258.65           | 217.77           | -0.83          |        | 376.16             | 111.50           | -5.45          |        | 5.76           | 1.20           | -6.24          |
| Estonia               | (30.99, 45.28) | (19.20, 33.16) | (-2.09, -1.63) | <0.001 | (240.81, 277.52) | (199.22, 237.88) | (-0.94, -0.71) | <0.001 | (354.52, 398.83)   | (98.28, 126.31)  | (-6.20, -4.68) | <0.001 | (3.38, 9.26)   | (0.24, 4.27)   | (-7.33, -5.13) |

|          |         |         |         |        |          |          |         |        |          |          |         |        |         |        |         |        |
|----------|---------|---------|---------|--------|----------|----------|---------|--------|----------|----------|---------|--------|---------|--------|---------|--------|
|          | 30.77   | 34.63   | 0.17    |        | 384.82   | 390.96   | 0.02    |        | 359.13   | 432.94   | 0.33    |        | 5.35    | 6.65   | 0.26    |        |
| Eswatini | (21.25, | (27.35, | (-0.48, | 0.598  | (349.23, | (365.71, | (-0.13, | 0.761  | (324.84, | (406.30, | (-0.51, | 0.431  | (1.92,  | (3.71, | (-0.66, | 0.570  |
|          | 43.34)  | 43.31)  | 0.83)   |        | 423.26)  | 417.55)  | 0.17)   |        | 396.28)  | 460.92)  | 1.17)   |        | 12.13)  | 11.06) | 1.19)   |        |
|          | 33.08   | 21.91   | -1.67   |        | 361.15   | 346.98   | -0.11   |        | 604.07   | 290.88   | -2.85   |        | 9.51    | 4.20   | -3.17   |        |
| Ethiopia | (31.80, | (21.25, | (-1.86, | <0.001 | (356.92, | (344.35, | (-0.27, | 0.162  | (598.66, | (288.48, | (-2.99, | <0.001 | (8.83,  | (3.91, | (-3.31, | <0.001 |
|          | 34.40)  | 22.59)  | -1.47)  |        | 365.42)  | 349.62)  | 0.05)   |        | 609.53)  | 293.30)  | -2.71)  |        | 10.23)  | 4.50)  | -3.03)  |        |
|          | 48.14   | 43.39   | -0.52   |        | 521.30   | 498.24   | -0.20   |        | 846.45   | 600.84   | -1.37   |        | 12.89   | 8.75   | -1.54   |        |
| Fiji     | (37.81, | (34.43, | (-0.60, | <0.001 | (485.80, | (466.62, | (-0.29, | <0.001 | (801.28, | (566.03, | (-1.61, | <0.001 | (7.85,  | (5.02, | (-1.81, | <0.001 |
|          | 60.53)  | 54.00)  | -0.44)  |        | 558.81)  | 531.46)  | -0.12)  |        | 893.60)  | 637.25)  | -1.13)  |        | 20.08)  | 14.19) | -1.27)  |        |
|          | 21.74   | 17.54   | -0.85   |        | 251.18   | 222.77   | -0.37   |        | 347.68   | 103.50   | -4.21   |        | 5.57    | 1.27   | -5.20   |        |
| Finland  | (18.93, | (14.92, | (-1.06, | <0.001 | (241.36, | (213.15, | (-0.53, | <0.001 | (336.33, | (97.04,  | (-4.55, | <0.001 | (4.23,  | (0.66, | (-5.56, | <0.001 |
|          | 24.90)  | 20.53)  | -0.64)  |        | 261.35)  | 232.75)  | -0.20)  |        | 359.37)  | 110.31)  | -3.87)  |        | 7.26)   | 2.28)  | -4.85)  |        |
|          | 15.18   | 12.28   | -0.71   |        | 198.37   | 159.00   | -0.70   |        | 204.33   | 93.45    | -2.96   |        | 3.05    | 1.18   | -3.62   |        |
| France   | (14.47, | (11.61, | (-0.80, | <0.001 | (195.78, | (156.57, | (-0.84, | <0.001 | (201.71, | (91.59,  | (-3.10, | <0.001 | (2.74,  | (0.98, | (-3.76, | <0.001 |
|          | 15.91)  | 12.98)  | -0.62)  |        | 200.98)  | 161.47)  | -0.57)  |        | 206.97)  | 95.35)   | -2.82)  |        | 3.39)   | 1.41)  | -3.47)  |        |
|          | 34.66   | 24.40   | -1.39   |        | 383.64   | 339.39   | -0.48   |        | 490.75   | 300.96   | -1.83   |        | 7.56    | 4.39   | -2.02   |        |
| Gabon    | (26.54, | (19.37, | (-1.47, | <0.001 | (355.59, | (319.99, | (-0.56, | <0.001 | (459.09, | (282.76, | (-1.93, | <0.001 | (4.09,  | (2.44, | (-2.14, | <0.001 |
|          | 44.55)  | 30.36)  | -1.31)  |        | 413.39)  | 359.70)  | -0.41)  |        | 524.08)  | 320.06)  | -1.72)  |        | 12.88)  | 7.32)  | -1.91)  |        |
|          | 40.16   | 38.53   | -0.01   |        | 470.60   | 463.19   | 0.08    |        | 486.21   | 462.79   | -0.22   |        | 7.37    | 6.94   | -0.28   |        |
| Gambia   | (30.84, | (32.63, | (-0.08, | 0.842  | (437.36, | (442.29, | (0.02,  | 0.017  | (452.50, | (441.98, | (-0.48, | 0.098  | (3.74,  | (4.59, | (-0.58, | 0.061  |
|          | 51.59)  | 45.23)  | 0.06)   |        | 505.85)  | 484.88)  | 0.15)   |        | 521.93)  | 484.38)  | 0.04)   |        | 13.27)  | 10.14) | 0.01)   |        |
|          | 51.84   | 38.84   | -0.72   |        | 383.23   | 335.64   | -0.51   |        | 792.47   | 653.65   | -0.98   |        | 12.64   | 10.56  | -0.87   |        |
| Georgia  | (47.58, | (34.21, | (-1.16, | 0.003  | (371.48, | (321.71, | (-0.68, | <0.001 | (775.55, | (634.22, | (-2.08, | 0.080  | (10.59, | (8.23, | (-2.05, | 0.142  |
|          | 56.38)  | 44.00)  | -0.27)  |        | 395.25)  | 350.08)  | -0.33)  |        | 809.67)  | 673.58)  | 0.13)   |        | 14.99)  | 13.41) | 0.31)   |        |
|          | 16.97   | 13.35   | -0.99   |        | 222.69   | 186.39   | -0.64   |        | 252.97   | 86.92    | -4.28   |        | 3.79    | 1.01   | -5.41   |        |
| Germany  | (16.33, | (12.75, | (-1.09, | <0.001 | (220.35, | (184.14, | (-0.78, | <0.001 | (250.48, | (85.39,  | (-4.78, | <0.001 | (3.50,  | (0.85, | (-5.96, | <0.001 |
|          | 17.63)  | 13.97)  | -0.89)  |        | 225.04)  | 188.67)  | -0.50)  |        | 255.49)  | 88.48)   | -3.78)  |        | 4.11)   | 1.19)  | -4.86)  |        |
|          | 32.49   | 39.41   | 0.56    |        | 425.08   | 450.55   | 0.25    |        | 441.87   | 440.10   | 0.01    |        | 6.70    | 6.62   | -0.03   |        |
| Ghana    | (30.29, | (37.84, | (0.30,  | <0.001 | (417.01, | (445.21, | (0.19,  | <0.001 | (433.63, | (434.83, | (-0.36, | 0.977  | (5.71,  | (5.99, | (-0.43, | 0.902  |
|          | 34.81)  | 41.03)  | 0.83)   |        | 433.26)  | 455.93)  | 0.31)   |        | 450.23)  | 445.41)  | 0.37)   |        | 7.81)   | 7.31)  | 0.39)   |        |
|          | 20.17   | 13.86   | -1.39   |        | 231.17   | 204.54   | -0.53   |        | 272.16   | 141.71   | -2.69   |        | 4.06    | 1.94   | -3.04   |        |
| Greece   | (18.20, | (12.06, | (-1.47, | <0.001 | (224.39, | (197.47, | (-0.62, | <0.001 | (264.79, | (135.85, | (-2.89, | <0.001 | (3.20,  | (1.32, | (-3.28, | <0.001 |
|          | 22.30)  | 15.87)  | -1.30)  |        | 238.10)  | 211.82)  | -0.43)  |        | 279.68)  | 147.77)  | -2.49)  |        | 5.07)   | 2.79)  | -2.80)  |        |

|               |         |         |         |        |          |          |         |        |          |          |         |        |         |        |         |        |
|---------------|---------|---------|---------|--------|----------|----------|---------|--------|----------|----------|---------|--------|---------|--------|---------|--------|
|               | 25.71   | 15.44   | -2.12   |        | 511.21   | 421.32   | -0.62   |        | 416.30   | 191.17   | -2.92   |        | 6.29    | 2.44   | -3.47   |        |
| Greenland     | (6.53,  | (1.33,  | (-2.25, | <0.001 | (400.78, | (307.05, | (-0.85, | <0.001 | (318.38, | (117.87, | (-3.06, | <0.001 | (0.12,  | (0.00, | (-3.67, | <0.001 |
|               | 78.41)  | 70.14)  | -1.98)  |        | 648.35)  | 568.06)  | -0.39)  |        | 540.90)  | 297.79)  | -2.78)  |        | 50.88)  | 49.36) | -3.28)  |        |
|               | 36.57   | 28.97   | -0.91   |        | 448.78   | 423.25   | -0.17   |        | 533.74   | 246.02   | -2.63   |        | 8.87    | 3.73   | -3.02   |        |
| Grenada       | (12.52, | (10.22, | (-1.05, | <0.001 | (349.41, | (338.30, | (-0.24, | <0.001 | (422.57, | (181.69, | (-2.92, | <0.001 | (0.46,  | (0.03, | (-3.33, | <0.001 |
|               | 84.47)  | 65.56)  | -0.77)  |        | 569.08)  | 523.96)  | -0.10)  |        | 666.26)  | 326.54)  | -2.34)  |        | 43.68)  | 27.78) | -2.71)  |        |
|               | 38.73   | 49.80   | 0.90    |        | 453.26   | 517.01   | 0.51    |        | 453.13   | 608.13   | 0.86    |        | 6.27    | 9.02   | 1.05    |        |
| Guam          | (20.66, | (27.96, | (0.83,  | <0.001 | (384.46, | (439.47, | (0.47,  | <0.001 | (384.33, | (523.61, | (0.61,  | <0.001 | (0.83,  | (1.66, | (0.73,  | <0.001 |
|               | 66.70)  | 82.37)  | 0.96)   |        | 531.26)  | 604.60)  | 0.55)   |        | 531.12)  | 702.73)  | 1.12)   |        | 22.81)  | 28.22) | 1.37)   |        |
|               | 37.84   | 22.39   | -2.25   |        | 371.53   | 321.82   | -0.62   |        | 513.78   | 333.06   | -3.26   |        | 8.11    | 5.24   | -3.37   |        |
| Guatemala     | (34.53, | (20.85, | (-2.43, | <0.001 | (360.98, | (315.95, | (-0.72, | <0.001 | (501.50, | (327.06, | (-3.88, | <0.001 | (6.62,  | (4.50, | (-4.03, | <0.001 |
|               | 41.40)  | 24.02)  | -2.08)  |        | 382.33)  | 327.78)  | -0.53)  |        | 526.29)  | 339.15)  | -2.63)  |        | 9.85)   | 6.06)  | -2.72)  |        |
|               | 33.93   | 38.04   | 0.57    |        | 352.79   | 382.44   | 0.45    |        | 423.76   | 463.31   | 0.60    |        | 6.50    | 7.13   | 0.62    |        |
| Guinea        | (30.21, | (35.31, | (0.50,  | <0.001 | (340.56, | (373.68, | (0.38,  | <0.001 | (410.40, | (453.73, | (0.46,  | <0.001 | (4.93,  | (5.97, | (0.46,  | <0.001 |
|               | 38.01)  | 40.95)  | 0.65)   |        | 365.36)  | 391.36)  | 0.52)   |        | 437.45)  | 473.06)  | 0.74)   |        | 8.43)   | 8.45)  | 0.77)   |        |
|               | 53.91   | 47.63   | -0.43   |        | 499.60   | 472.64   | -0.10   |        | 763.31   | 648.08   | -0.35   |        | 12.05   | 10.13  | -0.37   |        |
| Guinea-Bissau | (42.60, | (40.50, | (-0.46, | <0.001 | (464.10, | (449.76, | (-0.17, | 0.004  | (719.70, | (621.36, | (-0.44, | <0.001 | (7.10,  | (7.02, | (-0.47, | <0.001 |
|               | 67.46)  | 55.72)  | -0.39)  |        | 537.25)  | 496.45)  | -0.03)  |        | 809.04)  | 675.72)  | -0.26)  |        | 19.33)  | 14.24) | -0.27)  |        |
|               | 51.58   | 34.53   | -1.72   |        | 541.31   | 462.09   | -0.60   |        | 986.15   | 579.73   | -2.06   |        | 16.43   | 9.46   | -2.16   |        |
| Guyana        | (40.57, | (25.55, | (-1.91, | <0.001 | (504.93, | (428.10, | (-0.72, | <0.001 | (936.40, | (541.28, | (-2.47, | <0.001 | (10.54, | (5.11, | (-2.59, | <0.001 |
|               | 64.76)  | 45.71)  | -1.54)  |        | 579.75)  | 498.16)  | -0.48)  |        | 1037.97) | 620.27)  | -1.65)  |        | 24.56)  | 16.10) | -1.73)  |        |
|               | 39.99   | 31.35   | -0.88   |        | 399.93   | 382.34   | -0.08   |        | 603.50   | 418.90   | -0.96   |        | 10.02   | 6.83   | -1.02   |        |
| Haiti         | (36.22, | (29.15, | (-1.06, | <0.001 | (388.03, | (374.63, | (-0.21, | 0.221  | (588.74, | (410.76, | (-1.34, | <0.001 | (8.19,  | (5.83, | (-1.41, | <0.001 |
|               | 44.04)  | 33.68)  | -0.69)  |        | 412.11)  | 390.17)  | 0.05)   |        | 618.55)  | 427.17)  | -0.58)  |        | 12.15)  | 7.97)  | -0.62)  |        |
|               | 21.54   | 18.47   | -0.56   |        | 298.02   | 307.38   | 0.20    |        | 539.49   | 247.33   | -3.03   |        | 8.83    | 3.80   | -3.25   |        |
| Honduras      | (18.31, | (16.56, | (-0.77, | <0.001 | (285.78, | (299.45, | (0.12,  | <0.001 | (522.85, | (240.16, | (-3.53, | <0.001 | (6.80,  | (2.95, | (-3.81, | <0.001 |
|               | 25.20)  | 20.56)  | -0.36)  |        | 310.68)  | 315.47)  | 0.28)   |        | 556.55)  | 254.68)  | -2.53)  |        | 11.30)  | 4.83)  | -2.70)  |        |
|               | 41.52   | 22.13   | -2.63   |        | 337.70   | 244.52   | -1.15   |        | 510.27   | 150.67   | -5.19   |        | 8.08    | 1.84   | -6.29   |        |
| Hungary       | (38.76, | (19.84, | (-2.78, | <0.001 | (329.65, | (236.84, | (-1.33, | <0.001 | (500.51, | (144.70, | (-5.53, | <0.001 | (6.91,  | (1.24, | (-6.68, | <0.001 |
|               | 44.45)  | 24.63)  | -2.48)  |        | 345.90)  | 252.41)  | -0.97)  |        | 520.19)  | 156.86)  | -4.85)  |        | 9.42)   | 2.66)  | -5.90)  |        |
|               | 14.80   | 12.05   | -1.02   |        | 183.87   | 163.61   | -0.46   |        | 170.50   | 68.09    | -3.50   |        | 2.38    | 0.72   | -4.69   |        |
| Iceland       | (6.36,  | (5.11,  | (-1.21, | <0.001 | (149.41, | (133.93, | (-0.62, | <0.001 | (137.25, | (49.42,  | (-3.77, | <0.001 | (0.12,  | (0.00, | (-5.00, | <0.001 |
|               | 29.53)  | 24.90)  | -0.83)  |        | 224.10)  | 198.51)  | -0.29)  |        | 209.55)  | 92.14)   | -3.23)  |        | 11.73)  | 8.69)  | -4.38)  |        |



|                               |         |         |         |        |          |          |         |        |          |          |         |        |         |        |         |        |
|-------------------------------|---------|---------|---------|--------|----------|----------|---------|--------|----------|----------|---------|--------|---------|--------|---------|--------|
|                               | 23.58   | 23.71   | 0.01    |        | 308.76   | 308.00   | 0.14    |        | 310.19   | 256.65   | -0.67   |        | 4.67    | 3.77   | -0.71   |        |
| India                         | (23.35, | (23.54, | (-0.10, | 0.930  | (307.92, | (307.37, | (0.01,  | 0.040  | (309.34, | (256.07, | (-1.00, | <0.001 | (4.56,  | (3.70, | (-1.10, | 0.001  |
|                               | 23.81)  | 23.89)  | 0.11)   |        | 309.60)  | 308.62)  | 0.27)   |        | 311.04)  | 257.22)  | -0.34)  |        | 4.78)   | 3.84)  | -0.32)  |        |
|                               | 53.97   | 55.88   | 0.18    |        | 528.14   | 533.90   | 0.13    |        | 698.92   | 554.44   | -0.60   |        | 10.58   | 8.00   | -0.73   |        |
| Indonesia                     | (53.21, | (55.26, | (0.14,  | <0.001 | (525.76, | (531.96, | (0.07,  | <0.001 | (696.17, | (552.46, | (-0.72, | <0.001 | (10.24, | (7.77, | (-0.88, | <0.001 |
|                               | 54.75)  | 56.51)  | 0.22)   |        | 530.53)  | 535.85)  | 0.18)   |        | 701.68)  | 556.41)  | -0.49)  |        | 10.92)  | 8.24)  | -0.59)  |        |
|                               | 26.60   | 24.36   | -0.31   |        | 333.15   | 345.82   | 0.19    |        | 323.73   | 244.94   | -0.71   |        | 4.72    | 3.30   | -0.95   |        |
| Iran (Islamic<br>Republic of) | (25.58, | (23.66, | (-0.42, | <0.001 | (329.57, | (343.17, | (0.04,  | 0.014  | (320.21, | (242.67, | (-0.88, | <0.001 | (4.30,  | (3.04, | (-1.14, | <0.001 |
|                               | 27.64)  | 25.07)  | -0.21)  |        | 336.76)  | 348.50)  | 0.34)   |        | 327.27)  | 247.23)  | -0.54)  |        | 5.18)   | 3.57)  | -0.76)  |        |
|                               | 47.17   | 47.29   | 0.04    |        | 534.48   | 533.11   | 0.07    |        | 657.75   | 584.78   | -0.27   |        | 10.09   | 8.72   | -0.37   |        |
| Iraq                          | (44.72, | (45.87, | (0.01,  | 0.012  | (526.18, | (528.32, | (0.01,  | 0.036  | (648.54, | (579.80, | (-0.43, | 0.002  | (8.97,  | (8.11, | (-0.55, | <0.001 |
|                               | 49.73)  | 48.74)  | 0.07)   |        | 542.89)  | 537.94)  | 0.13)   |        | 667.07)  | 589.81)  | -0.10)  |        | 11.32)  | 9.36)  | -0.19)  |        |
|                               | 17.17   | 12.86   | -1.34   |        | 203.51   | 182.69   | -0.55   |        | 174.46   | 73.44    | -3.36   |        | 2.51    | 0.79   | -4.24   |        |
| Ireland                       | (14.18, | (10.53, | (-1.47, | <0.001 | (192.86, | (173.60, | (-0.66, | <0.001 | (164.59, | (67.72,  | (-3.60, | <0.001 | (1.46,  | (0.31, | (-4.58, | <0.001 |
|                               | 20.62)  | 15.58)  | -1.20)  |        | 214.61)  | 192.14)  | -0.44)  |        | 184.77)  | 79.54)   | -3.12)  |        | 4.05)   | 1.70)  | -3.90)  |        |
|                               | 14.99   | 12.77   | -0.83   |        | 189.11   | 180.74   | -0.15   |        | 167.50   | 69.23    | -3.67   |        | 2.34    | 0.71   | -4.97   |        |
| Israel                        | (12.60, | (11.10, | (-1.05, | <0.001 | (180.36, | (174.31, | (-0.29, | 0.029  | (159.31, | (65.27,  | (-3.97, | <0.001 | (1.46,  | (0.37, | (-5.29, | <0.001 |
|                               | 17.70)  | 14.62)  | -0.60)  |        | 198.18)  | 187.36)  | -0.02)  |        | 176.02)  | 73.37)   | -3.38)  |        | 3.56)   | 1.26)  | -4.64)  |        |
|                               | 16.46   | 12.64   | -1.56   |        | 176.84   | 184.03   | -0.01   |        | 208.23   | 94.69    | -3.03   |        | 3.11    | 1.16   | -3.80   |        |
| Italy                         | (15.70, | (11.89, | (-1.84, | <0.001 | (174.33, | (181.17, | (-0.11, | 0.779  | (205.50, | (92.65,  | (-3.22, | <0.001 | (2.78,  | (0.95, | (-4.00, | <0.001 |
|                               | 17.24)  | 13.42)  | -1.27)  |        | 179.37)  | 186.92)  | 0.08)   |        | 210.98)  | 96.76)   | -2.84)  |        | 3.46)   | 1.41)  | -3.59)  |        |
|                               | 23.36   | 25.43   | 0.16    |        | 357.78   | 396.20   | 0.40    |        | 264.54   | 220.72   | -1.94   |        | 4.01    | 3.29   | -2.18   |        |
| Jamaica                       | (18.92, | (21.44, | (0.04,  | 0.014  | (340.08, | (380.10, | (0.35,  | <0.001 | (249.35, | (208.66, | (-2.74, | <0.001 | (2.32,  | (1.97, | (-3.08, | <0.001 |
|                               | 28.59)  | 29.97)  | 0.28)   |        | 376.21)  | 412.83)  | 0.46)   |        | 280.47)  | 233.31)  | -1.14)  |        | 6.51)   | 5.20)  | -1.27)  |        |
|                               | 21.76   | 26.45   | 0.76    |        | 185.86   | 243.75   | 0.99    |        | 225.89   | 140.96   | -1.73   |        | 3.39    | 1.75   | -2.29   |        |
| Japan                         | (21.17, | (25.72, | (0.60,  | <0.001 | (184.11, | (241.49, | (0.72,  | <0.001 | (223.96, | (139.26, | (-1.90, | <0.001 | (3.16,  | (1.57, | (-2.55, | <0.001 |
|                               | 22.37)  | 27.20)  | 0.92)   |        | 187.63)  | 246.03)  | 1.26)   |        | 227.83)  | 142.69)  | -1.55)  |        | 3.63)   | 1.95)  | -2.02)  |        |
|                               | 37.55   | 30.96   | -0.74   |        | 516.89   | 471.11   | -0.28   |        | 218.87   | 134.19   | -2.13   |        | 2.60    | 1.22   | -3.38   |        |
| Jordan                        | (32.90, | (28.88, | (-0.92, | <0.001 | (499.47, | (462.91, | (-0.37, | <0.001 | (207.41, | (129.82, | (-2.39, | <0.001 | (1.47,  | (0.83, | (-3.79, | <0.001 |
|                               | 42.74)  | 33.15)  | -0.56)  |        | 534.82)  | 479.43)  | -0.20)  |        | 230.85)  | 138.67)  | -1.87)  |        | 4.33)   | 1.72)  | -2.97)  |        |
|                               | 46.69   | 32.60   | -1.23   |        | 372.86   | 309.09   | -0.71   |        | 488.57   | 434.85   | -1.16   |        | 7.39    | 6.75   | -1.13   |        |
| Kazakhstan                    | (44.41, | (30.77, | (-1.79, | <0.001 | (366.36, | (303.40, | (-0.98, | <0.001 | (481.13, | (428.13, | (-2.15, | 0.025  | (6.50,  | (5.94, | (-2.21, | 0.042  |
|                               | 49.07)  | 34.52)  | -0.68)  |        | 379.45)  | 314.87)  | -0.45)  |        | 496.10)  | 441.66)  | -0.15)  |        | 8.37)   | 7.65)  | -0.04)  |        |

|              |          |         |         |        |          |          |         |        |           |           |         |        |         |         |         |        |
|--------------|----------|---------|---------|--------|----------|----------|---------|--------|-----------|-----------|---------|--------|---------|---------|---------|--------|
|              | 30.89    | 28.47   | -0.39   |        | 440.04   | 443.36   | 0.05    |        | 376.56    | 374.17    | -0.06   |        | 5.51    | 5.42    | -0.12   |        |
| Kenya        | (29.08,  | (27.42, | (-0.55, | <0.001 | (433.23, | (439.19, | (-0.00, | 0.056  | (370.27,  | (370.35,  | (-0.46, | 0.769  | (4.76,  | (4.97,  | (-0.59, | 0.614  |
|              | 32.79)   | 29.56)  | -0.22)  |        | 446.94)  | 447.56)  | 0.10)   |        | 382.94)   | 378.01)   | 0.35)   |        | 6.35)   | 5.91)   | 0.35)   |        |
|              | 195.84   | 140.91  | -1.49   |        | 1019.89  | 882.03   | -0.64   |        | 3714.70   | 3305.41   | -0.76   |        | 61.65   | 54.67   | -0.78   |        |
| Kiribati     | (127.44, | (96.38, | (-1.62, | <0.001 | (854.22, | (763.86, | (-0.72, | <0.001 | (3395.72, | (3073.91, | (-0.90, | <0.001 | (26.87, | (28.61, | (-0.93, | <0.001 |
|              | 289.32)  | 199.44) | -1.37)  |        | 1209.57) | 1013.72) | -0.55)  |        | 4056.94)  | 3550.15)  | -0.61)  |        | 122.76) | 95.24)  | -0.64)  |        |
|              | 26.55    | 28.53   | 0.03    |        | 375.90   | 389.20   | 0.11    |        | 203.75    | 187.96    | -0.36   |        | 2.50    | 2.27    | -0.47   |        |
| Kuwait       | (22.30,  | (25.47, | (-0.28, | 0.826  | (359.46, | (377.54, | (0.01,  | 0.039  | (191.35,  | (179.78,  | (-0.94, | 0.211  | (1.31,  | (1.47,  | (-1.27, | 0.242  |
|              | 31.55)   | 31.95)  | 0.35)   |        | 393.05)  | 401.23)  | 0.22)   |        | 216.88)   | 196.51)   | 0.22)   |        | 4.55)   | 3.50)   | 0.34)   |        |
|              | 45.58    | 29.15   | -1.79   |        | 332.53   | 251.64   | -1.22   |        | 585.12    | 393.68    | -2.54   |        | 9.28    | 6.20    | -2.65   |        |
| Kyrgyzstan   | (41.09,  | (26.28, | (-2.05, | <0.001 | (320.21, | (243.09, | (-1.35, | <0.001 | (568.74,  | (382.88,  | (-3.14, | <0.001 | (7.30,  | (4.91,  | (-3.29, | <0.001 |
|              | 50.45)   | 32.26)  | -1.52)  |        | 345.22)  | 260.42)  | -1.08)  |        | 601.87)   | 404.70)   | -1.94)  |        | 11.63)  | 7.74)   | -1.99)  |        |
| Lao People's | 70.18    | 47.78   | -1.57   |        | 510.00   | 411.45   | -0.80   |        | 711.37    | 619.67    | -0.34   |        | 10.90   | 9.49    | -0.33   |        |
| Democratic   | (63.88,  | (44.36, | (-1.65, | <0.001 | (492.85, | (401.33, | (-0.90, | <0.001 | (691.04,  | (607.22,  | (-0.56, | 0.003  | (8.49,  | (8.00,  | (-0.59, | 0.013  |
| Republic     | 76.95)   | 51.39)  | -1.50)  |        | 527.61)  | 421.76)  | -0.71)  |        | 732.16)   | 632.32)   | -0.12)  |        | 13.80)  | 11.19)  | -0.08)  |        |
|              | 30.22    | 25.49   | -0.66   |        | 250.94   | 238.68   | -0.10   |        | 303.33    | 169.49    | -2.91   |        | 4.50    | 2.20    | -3.29   |        |
| Latvia       | (25.57,  | (20.21, | (-0.75, | <0.001 | (237.19, | (222.00, | (-0.21, | 0.070  | (288.13,  | (155.51,  | (-3.63, | <0.001 | (2.83,  | (0.90,  | (-4.21, | <0.001 |
|              | 35.51)   | 31.94)  | -0.57)  |        | 265.32)  | 256.48)  | 0.01)   |        | 319.16)   | 184.57)   | -2.18)  |        | 6.84)   | 4.84)   | -2.36)  |        |
|              | 26.10    | 25.45   | 0.11    |        | 359.18   | 369.56   | 0.28    |        | 195.97    | 146.37    | -0.75   |        | 2.48    | 1.61    | -1.26   |        |
| Lebanon      | (21.91,  | (22.50, | (-0.13, | 0.356  | (343.19, | (358.06, | (0.16,  | <0.001 | (184.25,  | (139.17,  | (-1.11, | <0.001 | (1.32,  | (0.94,  | (-1.74, | <0.001 |
|              | 30.90)   | 28.70)  | 0.34)   |        | 375.76)  | 381.35)  | 0.41)   |        | 208.28)   | 153.87)   | -0.38)  |        | 4.30)   | 2.61)   | -0.77)  |        |
|              | 29.10    | 47.08   | 1.83    |        | 338.46   | 406.40   | 0.76    |        | 318.22    | 502.51    | 2.20    |        | 4.73    | 7.87    | 2.37    |        |
| Lesotho      | (23.21,  | (41.05, | (1.41,  | <0.001 | (317.71, | (388.39, | (0.67,  | <0.001 | (298.13,  | (482.44,  | (1.70,  | <0.001 | (2.55,  | (5.53,  | (1.80,  | <0.001 |
|              | 36.11)   | 53.75)  | 2.26)   |        | 360.26)  | 425.04)  | 0.85)   |        | 339.37)   | 523.22)   | 2.71)   |        | 8.08)   | 10.87)  | 2.94)   |        |
|              | 36.10    | 31.89   | -0.36   |        | 415.88   | 402.25   | 0.07    |        | 469.05    | 359.62    | -0.84   |        | 7.18    | 5.32    | -0.97   |        |
| Liberia      | (29.48,  | (28.28, | (-0.49, | <0.001 | (392.64, | (389.19, | (-0.06, | 0.302  | (444.15,  | (347.26,  | (-1.08, | <0.001 | (4.41,  | (3.91,  | (-1.22, | <0.001 |
|              | 43.83)   | 35.85)  | -0.23)  |        | 440.21)  | 415.64)  | 0.20)   |        | 495.04)   | 372.32)   | -0.60)  |        | 11.13)  | 7.10)   | -0.72)  |        |
|              | 27.01    | 30.16   | 0.52    |        | 350.86   | 390.49   | 0.48    |        | 416.43    | 363.53    | -0.51   |        | 6.16    | 5.25    | -0.63   |        |
| Libya        | (23.54,  | (27.55, | (0.45,  | <0.001 | (337.95, | (380.93, | (0.41,  | <0.001 | (402.55,  | (354.27,  | (-0.76, | <0.001 | (4.56,  | (4.20,  | (-0.90, | <0.001 |
|              | 30.89)   | 32.96)  | 0.59)   |        | 364.16)  | 400.24)  | 0.56)   |        | 430.68)   | 372.98)   | -0.26)  |        | 8.16)   | 6.50)   | -0.36)  |        |
|              | 32.18    | 27.41   | -0.37   |        | 256.05   | 236.58   | -0.20   |        | 288.38    | 199.95    | -1.11   |        | 4.25    | 2.77    | -1.20   |        |
| Lithuania    | (28.12,  | (22.80, | (-0.47, | <0.001 | (244.35, | (222.64, | (-0.26, | <0.001 | (275.92,  | (187.17,  | (-1.68, | 0.001  | (2.86,  | (1.46,  | (-1.90, | 0.002  |

|                  |         |         |         |        |          |          |         |        |           |           |         |        |         |         |         |        |
|------------------|---------|---------|---------|--------|----------|----------|---------|--------|-----------|-----------|---------|--------|---------|---------|---------|--------|
|                  | 36.68)  | 32.80)  | -0.28)  |        | 268.18)  | 251.25)  | -0.15)  |        | 301.27)   | 213.47)   | -0.53)  |        | 6.10)   | 4.91)   | -0.49)  |        |
|                  | 18.20)  | 12.00)  | -1.86)  |        | 211.90)  | 190.22)  | -0.34)  |        | 277.18)   | 90.28)    | -4.67)  |        | 4.19)   | 1.06)   | -5.88)  |        |
| Luxembourg       | (10.03, | (6.50,  | (-2.11, | <0.001 | (181.00, | (165.79, | (-0.45, | <0.001 | (241.02,  | (73.71,   | (-5.16, | <0.001 | (0.94,  | (0.05,  | (-6.42, | <0.001 |
|                  | 31.48)  | 20.95)  | -1.61)  |        | 247.35)  | 217.72)  | -0.23)  |        | 317.94)   | 109.96)   | -4.17)  |        | 13.28)  | 6.33)   | -5.33)  |        |
|                  | 78.10)  | 55.31)  | -1.42)  |        | 587.79)  | 498.79)  | -0.66)  |        | 1579.55)  | 938.90)   | -1.57)  |        | 25.59)  | 14.94)  | -1.61)  |        |
| Madagascar       | (74.20, | (53.22, | (-1.52, | <0.001 | (577.02, | (492.50, | (-0.74, | <0.001 | (1562.20, | (930.38,  | (-1.89, | <0.001 | (23.40, | (13.87, | (-1.95, | <0.001 |
|                  | 82.17)  | 57.47)  | -1.31)  |        | 598.72)  | 505.14)  | -0.58)  |        | ,         | 947.49)   | -1.24)  |        | 27.94)  | 16.07)  | -1.27)  |        |
|                  | 26.26)  | 26.85)  | -0.10)  |        | 370.25)  | 385.28)  | 0.11)   |        | 457.33)   | 446.77)   | -0.38)  |        | 6.95)   | 6.74)   | -0.43)  |        |
| Malawi           | (23.74, | (25.07, | (-0.28, | 0.313  | (360.71, | (378.50, | (0.01,  | 0.027  | (446.80,  | (439.51,  | (-0.69, | 0.020  | (5.70,  | (5.87,  | (-0.77, | 0.014  |
|                  | 28.99)  | 28.73)  | 0.10)   |        | 379.99)  | 392.16)  | 0.21)   |        | 468.06)   | 454.13)   | -0.06)  |        | 8.43)   | 7.72)   | -0.09)  |        |
|                  | 49.54)  | 37.40)  | -1.05)  |        | 538.07)  | 446.02)  | -0.70)  |        | 698.61)   | 437.71)   | -1.71)  |        | 10.30)  | 6.20)   | -1.84)  |        |
| Malaysia         | (47.25, | (36.01, | (-1.27, | <0.001 | (530.45, | (441.20, | (-0.86, | <0.001 | (689.95,  | (432.93,  | (-2.11, | <0.001 | (9.27,  | (5.65,  | (-2.29, | <0.001 |
|                  | 51.91)  | 38.83)  | -0.82)  |        | 545.78)  | 450.88)  | -0.54)  |        | 707.36)   | 442.53)   | -1.31)  |        | 11.42)  | 6.80)   | -1.39)  |        |
|                  | 49.28)  | 27.28)  | -2.29)  |        | 462.28)  | 348.87)  | -0.93)  |        | 838.10)   | 273.75)   | -3.78)  |        | 13.23)  | 3.57)   | -4.50)  |        |
| Maldives         | (27.98, | (19.88, | (-2.61, | <0.001 | (391.22, | (321.23, | (-1.12, | <0.001 | (740.60,  | (248.74,  | (-4.08, | <0.001 | (3.68,  | (1.31,  | (-4.83, | <0.001 |
|                  | 81.75)  | 37.66)  | -1.97)  |        | 543.55)  | 379.12)  | -0.74)  |        | 945.82)   | 301.43)   | -3.48)  |        | 35.11)  | 9.53)   | -4.18)  |        |
|                  | 32.83)  | 27.79)  | -0.54)  |        | 373.96)  | 345.38)  | -0.19)  |        | 393.89)   | 329.70)   | -0.56)  |        | 5.92)   | 4.88)   | -0.62)  |        |
| Mali             | (29.71, | (25.99, | (-0.72, | <0.001 | (363.25, | (338.96, | (-0.31, | 0.002  | (382.95,  | (323.48,  | (-0.83, | <0.001 | (4.64,  | (4.14,  | (-0.91, | <0.001 |
|                  | 36.19)  | 29.69)  | -0.36)  |        | 384.92)  | 351.89)  | -0.08)  |        | 405.08)   | 336.02)   | -0.29)  |        | 7.46)   | 5.72)   | -0.32)  |        |
|                  | 18.39)  | 14.45)  | -1.14)  |        | 215.20)  | 192.05)  | -0.42)  |        | 175.07)   | 100.14)   | -2.58)  |        | 2.41)   | 1.22)   | -3.21)  |        |
| Malta            | (9.89,  | (7.16,  | (-1.27, | <0.001 | (182.89, | (162.12, | (-0.51, | <0.001 | (145.67,  | (78.70,   | (-2.89, | <0.001 | (0.23,  | (0.02,  | (-3.65, | <0.001 |
|                  | 31.73)  | 27.39)  | -1.02)  |        | 251.94)  | 226.86)  | -0.34)  |        | 209.00)   | 126.60)   | -2.27)  |        | 10.22)  | 9.58)   | -2.77)  |        |
|                  | 86.31)  | 80.33)  | -0.35)  |        | 610.25)  | 584.94)  | -0.15)  |        | 1569.18)  | 1585.57)  | 0.02)   |        | 24.86)  | 25.94)  | 0.06)   |        |
| Marshall Islands | (33.77, | (38.29, | (-0.42, | <0.001 | (448.91, | (457.43, | (-0.19, | <0.001 | (1305.74, | (1370.30, | (-0.11, | 0.732  | (2.90,  | (5.69,  | (-0.09, | 0.427  |
|                  | 183.23) | 148.84) | -0.27)  |        | 812.48)  | 737.35)  | -0.11)  |        | ,         | ,         | 0.15)   |        | 94.75)  | 74.34)  | 0.21)   |        |
|                  | 45.71)  | 28.88)  | -1.78)  |        | 499.05)  | 416.83)  | -0.62)  |        | 1872.13)  | 1825.37)  |         |        |         |         |         |        |
| Mauritania       | (38.70, | (24.99, | (-2.02, | <0.001 | (475.27, | (401.68, | (-0.75, | <0.001 | 519.27)   | 249.71)   | -2.27)  |        | 7.86)   | 3.40)   | -2.59)  |        |
|                  | 53.68)  | 33.24)  | -1.54)  |        | 523.77)  | 432.43)  | -0.49)  |        | (495.09,  | (237.98,  | (-2.46, | <0.001 | (5.13,  | (2.15,  | (-2.79, | <0.001 |
|                  | 45.63)  | 35.79)  | -1.07)  |        | 479.62)  | 416.91)  | -0.63)  |        | 544.37)   | 261.90)   | -2.08)  |        | 11.60)  | 5.15)   | -2.39)  |        |
| Mauritius        | (37.65, | (28.69, | (-1.17, | <0.001 | (452.94, | (391.64, | (-0.73, | <0.001 | 621.42)   | 412.55)   | -1.59)  |        | 9.59)   | 5.98)   | -1.78)  |        |
|                  | 54.84)  | 44.19)  | -0.96)  |        | 507.48)  | 443.44)  | -0.53)  |        | (590.86,  | (387.56,  | (-1.79, | <0.001 | (6.14,  | (3.34,  | (-2.01, | <0.001 |
|                  |         |         |         |        |          |          |         |        | 653.18)   | 438.78)   | -1.38)  |        | 14.33)  | 9.99)   | -1.56)  |        |

|                   |         |         |         |        |          |          |         |        |          |          |         |        |         |         |         |        |
|-------------------|---------|---------|---------|--------|----------|----------|---------|--------|----------|----------|---------|--------|---------|---------|---------|--------|
|                   | 24.01   | 21.94   | -0.34   |        | 356.80   | 365.56   | 0.13    |        | 223.97   | 198.65   | -0.25   |        | 3.33    | 2.89    | -0.32   |        |
| Mexico            | (23.24, | (21.36, | (-0.63, | 0.022  | (353.82, | (363.17, | (-0.02, | 0.085  | (221.60, | (196.88, | (-0.51, | 0.062  | (3.05,  | (2.68,  | (-0.60, | 0.031  |
|                   | 24.81)  | 22.54)  | -0.05)  |        | 359.80)  | 367.96)  | 0.29)   |        | 226.36)  | 200.43)  | 0.01)   |        | 3.64)   | 3.11)   | -0.03)  |        |
| Micronesia        | 95.90   | 74.56   | -0.95   |        | 630.31   | 555.68   | -0.45   |        | 2014.41  | 1673.18  | -0.72   |        | 33.39   | 27.28   | -0.78   |        |
| (Federated States | (56.26, | (41.38, | (-0.97, | <0.001 | (520.36, | (456.45, | (-0.48, | <0.001 | (1813.38 | (1498.13 | (-0.80, | <0.001 | (12.28, | (9.30,  | (-0.86, | <0.001 |
| of)               | 153.41) | 124.55) | -0.92)  |        | 757.19)  | 670.71)  | -0.42)  |        | 2232.15) | 1863.70) | -0.65)  |        | 73.38)  | 62.96)  | -0.69)  |        |
|                   | 14.07   | 12.93   | -0.35   |        | 186.82   | 177.96   | -0.18   |        | 186.23   | 104.47   | -2.01   |        | 2.74    | 1.35    | -2.48   |        |
| Monaco            | (0.07,  | (0.04,  | (-0.41, | <0.001 | (85.44,  | (78.99,  | (-0.27, | <0.001 | (85.19,  | (33.80,  | (-2.25, | <0.001 | (0.00,  | (0.00,  | (-2.75, | <0.001 |
|                   | 141.21) | 110.06) | -0.28)  |        | 376.86)  | 348.61)  | -0.09)  |        | 375.84)  | 249.05)  | -1.77)  |        | 123.93) | 88.83)  | -2.21)  |        |
|                   | 44.33   | 43.28   | -0.30   |        | 318.69   | 322.33   | -0.03   |        | 511.40   | 804.66   | 0.67    |        | 7.87    | 13.32   | 0.76    |        |
| Mongolia          | (37.72, | (38.63, | (-0.58, | 0.033  | (300.54, | (309.43, | (-0.12, | 0.470  | (488.55, | (784.23, | (0.16,  | 0.013  | (5.23,  | (10.82, | (0.17,  | 0.013  |
|                   | 51.85)  | 48.39)  | -0.03)  |        | 337.72)  | 335.69)  | 0.06)   |        | 535.12)  | 825.55)  | 1.18)   |        | 11.45)  | 16.31)  | 1.35)   |        |
|                   | 39.98   | 25.45   | -1.96   |        | 296.69   | 241.21   | -0.92   |        | 559.59   | 246.90   | -3.46   |        | 8.91    | 3.53    | -3.86   |        |
| Montenegro        | (29.90, | (17.02, | (-2.13, | <0.001 | (267.95, | (213.57, | (-1.02, | <0.001 | (519.86, | (218.92, | (-3.91, | <0.001 | (4.56,  | (0.98,  | (-4.37, | <0.001 |
|                   | 52.43)  | 36.82)  | -1.79)  |        | 327.72)  | 271.61)  | -0.82)  |        | 601.61)  | 277.65)  | -3.01)  |        | 15.75)  | 9.33)   | -3.34)  |        |
|                   | 37.69   | 34.38   | -0.34   |        | 436.35   | 413.20   | -0.15   |        | 436.91   | 253.21   | -1.95   |        | 6.57    | 3.35    | -2.32   |        |
| Morocco           | (35.94, | (33.06, | (-0.38, | <0.001 | (430.39, | (408.57, | (-0.23, | 0.001  | (430.91, | (249.59, | (-2.20, | <0.001 | (5.85,  | (2.94,  | (-2.65, | <0.001 |
|                   | 39.51)  | 35.75)  | -0.31)  |        | 442.37)  | 417.87)  | -0.07)  |        | 442.98)  | 256.87)  | -1.70)  |        | 7.36)   | 3.79)   | -1.99)  |        |
|                   | 36.89   | 44.72   | 0.95    |        | 435.69   | 487.36   | 0.62    |        | 427.20   | 636.49   | 1.94    |        | 6.47    | 10.00   | 2.09    |        |
| Mozambique        | (34.14, | (42.74, | (0.86,  | <0.001 | (426.24, | (480.93, | (0.50,  | <0.001 | (417.81, | (629.09, | (1.68,  | <0.001 | (5.36,  | (9.09,  | (1.80,  | <0.001 |
|                   | 39.81)  | 46.77)  | 1.05)   |        | 445.30)  | 493.86)  | 0.74)   |        | 436.76)  | 643.95)  | 2.19)   |        | 7.76)   | 10.99)  | 2.37)   |        |
|                   | 54.32   | 39.38   | -1.25   |        | 437.02   | 383.20   | -0.36   |        | 1649.35  | 1010.77  | -1.76   |        | 27.13   | 16.06   | -1.87   |        |
| Myanmar           | (52.67, | (38.19, | (-1.30, | <0.001 | (432.35, | (379.47, | (-0.48, | <0.001 | (1640.30 | (1004.73 | (-1.83, | <0.001 | (25.97, | (15.30, | (-1.95, | <0.001 |
|                   | 56.02)  | 40.60)  | -1.20)  |        | 441.73)  | 386.95)  | -0.23)  |        | 1658.44) | 1016.85) | -1.69)  |        | 28.33)  | 16.84)  | -1.79)  |        |
|                   | 31.81   | 22.61   | -1.71   |        | 393.11   | 366.70   | -0.36   |        | 326.53   | 280.85   | -1.42   |        | 4.76    | 4.04    | -1.69   |        |
| Namibia           | (24.87, | (18.51, | (-2.04, | <0.001 | (367.90, | (349.65, | (-0.44, | <0.001 | (303.62, | (265.88, | (-2.24, | 0.002  | (2.35,  | (2.42,  | (-2.65, | 0.001  |
|                   | 40.22)  | 27.39)  | -1.39)  |        | 419.70)  | 384.41)  | -0.27)  |        | 350.84)  | 296.48)  | -0.59)  |        | 8.75)   | 6.37)   | -0.72)  |        |
|                   | 93.23   | 86.38   | -0.33   |        | 691.97   | 645.69   | -0.28   |        | 2337.50  | 2144.57  | -0.29   |        | 38.54   | 35.24   | -0.29   |        |
| Nauru             | (9.40,  | (9.27,  | (-0.63, | 0.034  | (371.47, | (352.07, | (-0.38, | <0.001 | (1705.21 | (1572.54 | (-0.64, | 0.095  | (0.31,  | (0.32,  | (-0.66, | 0.109  |
|                   | 369.25) | 335.68) | -0.03)  |        | 1183.17) | 1092.03) | -0.18)  |        | 3133.17) | 2862.62) | 0.05)   |        | 278.92) | 251.54) | 0.07)   |        |

|                          |         |         |         |        |          |          |         |        |          |          |         |        |         |         |         |        |
|--------------------------|---------|---------|---------|--------|----------|----------|---------|--------|----------|----------|---------|--------|---------|---------|---------|--------|
|                          | 23.11   | 19.28   | -0.68   |        | 246.81   | 225.72   | -0.24   |        | 296.07   | 205.37   | -1.29   |        | 4.55    | 2.93    | -1.56   |        |
| Nepal                    | (21.47, | (18.12, | (-0.85, | <0.001 | (241.43, | (221.69, | (-0.34, | <0.001 | (290.13, | (201.54, | (-1.51, | <0.001 | (3.83,  | (2.49,  | (-1.81, | <0.001 |
|                          | 24.84)  | 20.51)  | -0.51)  |        | 252.29)  | 229.80)  | -0.13)  |        | 302.12)  | 209.25)  | -1.06)  |        | 5.36)   | 3.44)   | -1.31)  |        |
|                          | 15.96   | 13.33   | -0.83   |        | 199.64   | 194.13   | -0.10   |        | 151.25   | 74.30    | -2.78   |        | 2.10    | 0.79    | -3.75   |        |
| Netherlands              | (14.59, | (11.99, | (-0.90, | <0.001 | (194.73, | (188.93, | (-0.15, | <0.001 | (146.99, | (71.10,  | (-3.01, | <0.001 | (1.63,  | (0.49,  | (-4.09, | <0.001 |
|                          | 17.42)  | 14.78)  | -0.75)  |        | 204.64)  | 199.44)  | -0.05)  |        | 155.61)  | 77.61)   | -2.55)  |        | 2.68)   | 1.20)   | -3.42)  |        |
|                          | 15.26   | 13.58   | -0.51   |        | 154.19   | 171.67   | 0.44    |        | 151.30   | 80.40    | -2.55   |        | 2.15    | 0.92    | -3.42   |        |
| New Zealand              | (12.48, | (10.98, | (-0.72, | <0.001 | (145.05, | (162.08, | (0.21,  | <0.001 | (142.25, | (73.88,  | (-2.73, | <0.001 | (1.20,  | (0.35,  | (-3.60, | <0.001 |
|                          | 18.47)  | 16.62)  | -0.30)  |        | 163.75)  | 181.68)  | 0.67)   |        | 160.78)  | 87.35)   | -2.37)  |        | 3.56)   | 1.96)   | -3.23)  |        |
|                          | 25.34   | 20.53   | -0.74   |        | 361.36   | 346.48   | -0.07   |        | 209.18   | 110.04   | -2.11   |        | 3.15    | 1.36    | -2.80   |        |
| Nicaragua                | (21.46, | (18.19, | (-0.88, | <0.001 | (346.46, | (336.69, | (-0.14, | 0.038  | (197.60, | (104.55, | (-2.47, | <0.001 | (1.86,  | (0.81,  | (-3.22, | <0.001 |
|                          | 29.76)  | 23.10)  | -0.61)  |        | 376.77)  | 356.50)  | -0.00)  |        | 221.29)  | 115.75)  | -1.75)  |        | 5.03)   | 2.15)   | -2.38)  |        |
|                          | 37.20   | 31.65   | -0.57   |        | 394.60   | 367.17   | -0.16   |        | 476.39   | 391.02   | -0.56   |        | 7.35    | 5.95    | -0.60   |        |
| Niger                    | (33.76, | (29.73, | (-0.71, | <0.001 | (383.24, | (360.63, | (-0.29, | 0.023  | (463.93, | (384.24, | (-0.76, | <0.001 | (5.86,  | (5.13,  | (-0.81, | <0.001 |
|                          | 40.91)  | 33.67)  | -0.44)  |        | 406.22)  | 373.82)  | -0.02)  |        | 489.12)  | 397.90)  | -0.36)  |        | 9.12)   | 6.87)   | -0.39)  |        |
|                          | 25.50   | 23.86   | -0.26   |        | 344.18   | 368.48   | 0.34    |        | 318.27   | 256.14   | -1.03   |        | 4.76    | 3.63    | -1.26   |        |
| Nigeria                  | (24.71, | (23.34, | (-0.41, | 0.001  | (341.27, | (366.46, | (0.16,  | <0.001 | (315.47, | (254.44, | (-1.19, | <0.001 | (4.42,  | (3.43,  | (-1.45, | <0.001 |
|                          | 26.30)  | 24.38)  | -0.11)  |        | 347.10)  | 370.50)  | 0.51)   |        | 321.10)  | 257.84)  | -0.86)  |        | 5.12)   | 3.84)   | -1.07)  |        |
|                          | 63.60   | 52.35   | -0.79   |        | 557.26   | 515.94   | -0.31   |        | 1311.18  | 849.66   | -1.88   |        | 21.06   | 12.92   | -2.03   |        |
| Niue                     | (0.00,  | (0.00,  |         |        |          |          |         |        |          |          |         |        | (0.00,  | (0.00,  | -2.03   |        |
|                          |         |         | (-0.86, | <0.001 | (74.29,  | (33.26,  | (-0.35, | <0.001 | (427.28, | (131.36, | (-2.07, | <0.001 |         |         | (-2.28, | <0.001 |
|                          | 1154.81 | 1567.76 | -0.72)  |        | 1987.19) | 2372.45) | -0.26)  |        | 3090.54) | 2892.40) | -1.68)  |        | 1073.21 | 1492.11 | -1.79)  |        |
|                          | )       | )       |         |        |          |          |         |        |          |          |         |        | )       | )       |         |        |
|                          | 33.11   | 26.78   | -0.86   |        | 305.25   | 276.15   | -0.34   |        | 446.53   | 306.88   | -1.69   |        | 6.78    | 4.42    | -1.92   |        |
| North Macedonia          | (27.84, | (22.14, | (-0.90, | <0.001 | (288.78, | (260.86, | (-0.42, | <0.001 | (426.53, | (290.46, | (-1.96, | <0.001 | (4.53,  | (2.67,  | (-2.22, | <0.001 |
|                          | 39.10)  | 32.26)  | -0.82)  |        | 322.42)  | 292.23)  | -0.25)  |        | 467.23)  | 324.11)  | -1.42)  |        | 9.79)   | 7.08)   | -1.61)  |        |
|                          | 48.99   | 44.30   | -0.46   |        | 493.14   | 491.45   | -0.05   |        | 943.00   | 632.27   | -1.73   |        | 14.95   | 9.45    | -1.92   |        |
| Northern Mariana Islands | (18.20, | (7.86,  | (-0.51, | <0.001 | (377.45, | (329.91, | (-0.12, | 0.106  | (780.57, | (447.65, | (-1.98, | <0.001 | (1.66,  | (0.02,  | (-2.22, | <0.001 |
|                          | 113.40) | 149.65) | -0.41)  |        | 637.96)  | 711.48)  | 0.01)   |        | 1133.83) | 874.48)  | -1.48)  |        | 65.83)  | 95.86)  | -1.63)  |        |
|                          | 23.11   | 22.58   | -0.60   |        | 306.22   | 287.95   | -0.48   |        | 174.24   | 71.33    | -3.28   |        | 2.34    | 0.57    | -4.90   |        |
| Norway                   | (19.97, | (19.63, | (-0.80, | <0.001 | (294.49, | (277.20, | (-0.67, | <0.001 | (165.44, | (66.05,  | (-3.45, | <0.001 | (1.43,  | (0.20,  | (-5.16, | <0.001 |
|                          | 26.62)  | 25.89)  | -0.40)  |        | 318.32)  | 299.03)  | -0.28)  |        | 183.41)  | 76.94)   | -3.10)  |        | 3.65)   | 1.34)   | -4.65)  |        |
|                          | 28.94   | 24.33   | -0.67   |        | 385.26   | 397.72   | 0.25    |        | 438.45   | 239.18   | -1.81   |        | 6.41    | 2.98    | -2.28   |        |
| Oman                     | (24.53, | (21.94, | (-0.75, | <0.001 | (368.73, | (387.99, | (0.16,  | <0.001 | (420.42, | (230.65, | (-2.13, | <0.001 | (4.41,  | (2.10,  | (-2.71, | <0.001 |

|                  |         |         |         |        |          |          |         |        |           |          |         |         |         |         |         |        |
|------------------|---------|---------|---------|--------|----------|----------|---------|--------|-----------|----------|---------|---------|---------|---------|---------|--------|
|                  | 33.99)  | 27.02)  | -0.60)  |        | 402.41)  | 407.74)  | 0.34)   |        | 457.12)   | 248.03)  | -1.49)  | 9.09)   | 4.24)   | -1.85)  |         |        |
|                  | 31.84)  | 31.58)  | -0.11)  |        | 358.11)  | 362.55)  | 0.14)   |        | 374.47)   | 471.19)  | 0.39)   | 5.71)   | 7.31)   | 0.38)   |         |        |
| Pakistan         | (31.02, | (31.03, | (-0.17, | <0.001 | (355.40, | (360.72, | (0.05,  | 0.004  | (371.65,  | (469.11, | (0.11,  | 0.008   | (5.36,  | (7.04,  | (0.06,  | 0.021  |
|                  | 32.67)  | 32.13)  | -0.06)  |        | 360.84)  | 364.38)  | 0.23)   |        | 377.31)   | 473.29)  | 0.67)   | 6.07)   | 7.57)   | 0.70)   |         |        |
|                  | 74.61)  | 68.89)  | -0.32)  |        | 620.94)  | 589.28)  | -0.17)  |        | 1522.39)  | 1327.90) | -0.25)  | 24.45)  | 21.16)  | -0.25)  |         |        |
| Palau            | (13.04, | (12.43, | (-0.34, | <0.001 | (387.67, | (372.39, | (-0.21, | <0.001 | (1141.73, | (987.31, | (-0.40, | 0.003   | (0.36,  | (0.27,  | (-0.44, | 0.011  |
|                  | 239.79) | 236.67) | -0.30)  |        | 946.60)  | 900.82)  | -0.14)  |        | ,         | 1760.34) | -0.09)  | 159.61) | 164.86) | -0.06)  |         |        |
|                  | 28.00)  | 23.27)  | -0.83)  |        | 368.53)  | 352.42)  | -0.05)  |        | 286.23)   | 171.68)  | -2.09)  | 4.01)   | 2.09)   | -2.68)  |         |        |
| Palestine        | (22.46, | (20.30, | (-0.98, | <0.001 | (347.68, | (340.64, | (-0.17, | 0.421  | (267.96,  | (163.50, | (-2.39, | <0.001  | (2.10,  | (1.27,  | (-3.08, | <0.001 |
|                  | 34.63)  | 26.57)  | -0.68)  |        | 390.42)  | 364.53)  | 0.07)   |        | 305.55)   | 180.18)  | -1.79)  | 7.12)   | 3.27)   | -2.28)  |         |        |
|                  | 23.73)  | 19.69)  | -0.63)  |        | 346.09)  | 339.27)  | 0.01)   |        | 263.44)   | 166.57)  | -1.41)  | 4.03)   | 2.38)   | -1.66)  |         |        |
| Panama           | (19.50, | (16.73, | (-0.77, | <0.001 | (329.52, | (326.64, | (-0.09, | 0.857  | (248.94,  | (157.73, | (-1.80, | <0.001  | (2.41,  | (1.43,  | (-2.10, | <0.001 |
|                  | 28.64)  | 23.02)  | -0.49)  |        | 363.31)  | 352.28)  | 0.11)   |        | 278.61)   | 175.77)  | -1.03)  | 6.37)   | 3.72)   | -1.21)  |         |        |
|                  | 74.03)  | 72.76)  | -0.05)  |        | 538.41)  | 534.07)  | -0.01)  |        | 960.96)   | 969.66)  | 0.04)   | 15.10)  | 15.20)  | 0.03)   |         |        |
| Papua New Guinea | (67.98, | (69.00, | (-0.11, | 0.099  | (521.93, | (523.83, | (-0.04, | 0.593  | (938.93,  | (955.89, | (-0.07, | 0.468   | (12.43, | (13.51, | (-0.09, | 0.653  |
|                  | 80.50)  | 76.67)  | 0.01)   |        | 555.30)  | 544.46)  | 0.02)   |        | 983.39)   | 983.58)  | 0.14)   | 18.19)  | 17.04)  | 0.14)   |         |        |
|                  | 31.96)  | 29.61)  | -0.32)  |        | 402.27)  | 396.71)  | -0.07)  |        | 332.46)   | 230.93)  | -1.56)  | 5.26)   | 3.44)   | -1.80)  |         |        |
| Paraguay         | (27.98, | (26.90, | (-0.41, | <0.001 | (387.93, | (386.67, | (-0.11, | 0.001  | (319.32,  | (223.27, | (-1.82, | <0.001  | (3.71,  | (2.56,  | (-2.10, | <0.001 |
|                  | 36.37)  | 32.51)  | -0.23)  |        | 417.01)  | 406.94)  | -0.03)  |        | 346.02)   | 238.78)  | -1.29)  | 7.24)   | 4.53)   | -1.50)  |         |        |
|                  | 39.20)  | 29.25)  | -0.99)  |        | 443.05)  | 382.29)  | -0.41)  |        | 552.92)   | 307.07)  | -1.64)  | 8.58)   | 4.60)   | -1.75)  |         |        |
| Peru             | (37.28, | (27.98, | (-1.08, | <0.001 | (436.48, | (377.66, | (-0.49, | <0.001 | (545.75,  | (302.94, | (-1.95, | <0.001  | (7.70,  | (4.11,  | (-2.09, | <0.001 |
|                  | 41.20)  | 30.56)  | -0.90)  |        | 449.69)  | 386.96)  | -0.33)  |        | 560.17)   | 311.25)  | -1.33)  | 9.54)   | 5.14)   | -1.42)  |         |        |
|                  | 53.79)  | 42.23)  | -0.76)  |        | 455.76)  | 395.01)  | -0.37)  |        | 268.79)   | 600.69)  | 3.86)   | 3.30)   | 9.32)   | 4.55)   |         |        |
| Philippines      | (52.45, | (41.39, | (-0.87, | <0.001 | (451.89, | (392.42, | (-0.52, | <0.001 | (265.80,  | (597.49, | (2.96,  | <0.001  | (2.97,  | (8.93,  | (3.37,  | <0.001 |
|                  | 55.14)  | 43.09)  | -0.64)  |        | 459.66)  | 397.61)  | -0.23)  |        | 271.81)   | 603.91)  | 4.76)   | 3.66)   | 9.73)   | 5.74)   |         |        |
|                  | 30.06)  | 17.72)  | -2.15)  |        | 236.11)  | 168.75)  | -1.27)  |        | 431.63)   | 189.26)  | -3.13)  | 6.84)   | 2.72)   | -3.48)  |         |        |
| Poland           | (28.87, | (16.74, | (-2.32, | <0.001 | (232.74, | (165.77, | (-1.53, | <0.001 | (427.08,  | (186.13, | (-3.27, | <0.001  | (6.28,  | (2.36,  | (-3.64, | <0.001 |
|                  | 31.30)  | 18.74)  | -1.97)  |        | 239.51)  | 171.78)  | -1.02)  |        | 436.23)   | 192.45)  | -2.98)  | 7.44)   | 3.12)   | -3.33)  |         |        |
|                  | 24.66)  | 10.84)  | -3.23)  |        | 272.81)  | 219.95)  | -0.85)  |        | 408.31)   | 104.56)  | -5.97)  | 6.42)   | 1.31)   | -6.76)  |         |        |
| Portugal         | (22.45, | (9.28,  | (-3.49, | <0.001 | (265.34, | (212.68, | (-0.99, | <0.001 | (399.16,  | (99.65,  | (-6.50, | <0.001  | (5.32,  | (0.82,  | (-7.43, | <0.001 |
|                  | 27.03)  | 12.60)  | -2.97)  |        | 280.43)  | 227.41)  | -0.71)  |        | 417.61)   | 109.66)  | -5.45)  | 7.69)   | 2.00)   | -6.08)  |         |        |
| Puerto Rico      | 23.97)  | 20.77)  | -0.65)  | <0.001 | 362.50)  | 361.54)  | 0.40)   | 0.003  | 218.69)   | 120.05)  | -2.59)  | <0.001  | 3.32)   | 1.56)   | -3.34)  | <0.001 |

|                                     |         |         |         |        |          |          |         |        |          |          |         |        |         |        |         |        |
|-------------------------------------|---------|---------|---------|--------|----------|----------|---------|--------|----------|----------|---------|--------|---------|--------|---------|--------|
|                                     | (20.36, | (17.16, | (-0.79, |        | (348.17, | (345.89, | (0.15,  |        | (207.50, | (111.13, | (-2.88, |        | (2.07,  | (0.71, | (-3.69, |        |
|                                     | 28.03)  | 24.92)  | -0.51)  |        | 377.27)  | 377.72)  | 0.66)   |        | 230.33)  | 129.50)  | -2.30)  |        | 5.05)   | 3.01)  | -2.99)  |        |
|                                     | 34.90   | 28.26   | -0.83   |        | 446.19   | 392.31   | -0.38   |        | 272.88   | 143.00   | -2.48   |        | 3.58    | 1.51   | -3.36   |        |
| Qatar                               | (26.60, | (25.18, | (-0.96, | <0.001 | (414.77, | (380.55, | (-0.41, | <0.001 | (247.20, | (135.70, | (-2.59, | <0.001 | (1.26,  | (0.86, | (-3.54, | <0.001 |
|                                     | 46.16)  | 31.92)  | -0.69)  |        | 480.25)  | 404.60)  | -0.35)  |        | 301.35)  | 150.86)  | -2.37)  |        | 9.75)   | 2.97)  | -3.17)  |        |
|                                     | 35.89   | 17.45   | -3.12   |        | 266.32   | 191.79   | -1.47   |        | 554.38   | 127.09   | -5.61   |        | 8.82    | 1.64   | -6.37   |        |
| Republic of Korea                   | (34.74, | (16.64, | (-3.33, | <0.001 | (263.18, | (189.07, | (-1.63, | <0.001 | (549.86, | (124.91, | (-5.86, | <0.001 | (8.26,  | (1.40, | (-6.59, | <0.001 |
|                                     | 37.06)  | 18.29)  | -2.90)  |        | 269.48)  | 194.55)  | -1.31)  |        | 558.94)  | 129.31)  | -5.37)  |        | 9.41)   | 1.91)  | -6.15)  |        |
|                                     | 33.78   | 28.04   | -0.50   |        | 252.51   | 227.75   | -0.40   |        | 359.92   | 229.56   | -1.91   |        | 5.52    | 3.28   | -2.13   |        |
| Republic of<br>Moldova              | (30.10, | (24.35, | (-0.58, | <0.001 | (242.30, | (217.10, | (-0.43, | <0.001 | (347.66, | (218.86, | (-2.31, | <0.001 | (4.10,  | (2.13, | (-2.61, | <0.001 |
|                                     | 37.83)  | 32.23)  | -0.43)  |        | 263.08)  | 238.87)  | -0.38)  |        | 372.54)  | 240.74)  | -1.50)  |        | 7.31)   | 4.96)  | -1.64)  |        |
|                                     | 31.53   | 21.55   | -1.57   |        | 261.59   | 232.14   | -0.40   |        | 371.97   | 249.39   | -1.95   |        | 5.74    | 3.59   | -2.28   |        |
| Romania                             | (29.90, | (19.94, | (-1.65, | <0.001 | (256.84, | (226.84, | (-0.50, | <0.001 | (366.33, | (243.89, | (-2.28, | <0.001 | (5.06,  | (2.96, | (-2.68, | <0.001 |
|                                     | 33.23)  | 23.26)  | -1.48)  |        | 266.40)  | 237.54)  | -0.29)  |        | 377.69)  | 255.00)  | -1.62)  |        | 6.49)   | 4.32)  | -1.88)  |        |
|                                     | 37.12   | 31.67   | -0.47   |        | 276.74   | 246.16   | -0.42   |        | 382.43   | 445.00   | -0.07   |        | 5.83    | 7.11   | -0.01   |        |
| Russian Federation                  | (36.45, | (31.01, | (-0.88, | 0.026  | (274.92, | (244.30, | (-0.60, | <0.001 | (380.27, | (442.53, | (-0.92, | 0.870  | (5.57,  | (6.81, | (-0.93, | 0.984  |
|                                     | 37.79)  | 32.35)  | -0.06)  |        | 278.58)  | 248.02)  | -0.23)  |        | 384.60)  | 447.48)  | 0.79)   |        | 6.10)   | 7.43)  | 0.92)   |        |
|                                     | 58.84   | 22.67   | -4.06   |        | 467.81   | 328.82   | -1.48   |        | 832.81   | 359.54   | -3.85   |        | 13.21   | 5.42   | -4.06   |        |
| Rwanda                              | (54.56, | (20.84, | (-4.42, | <0.001 | (455.68, | (321.75, | (-1.67, | <0.001 | (816.78, | (352.17, | (-4.26, | <0.001 | (11.25, | (4.55, | (-4.49, | <0.001 |
|                                     | 63.39)  | 24.62)  | -3.70)  |        | 480.20)  | 336.00)  | -1.29)  |        | 849.10)  | 367.04)  | -3.44)  |        | 15.44)  | 6.43)  | -3.62)  |        |
|                                     | 43.01   | 28.88   | -1.73   |        | 474.22   | 435.34   | -0.38   |        | 722.93   | 275.95   | -2.58   |        | 12.33   | 4.14   | -3.08   |        |
| Saint Kitts and<br>Nevis            | (9.88,  | (6.86,  | (-1.91, | <0.001 | (336.15, | (323.70, | (-0.47, | <0.001 | (545.89, | (188.93, | (-3.19, | <0.001 | (0.26,  | (0.00, | (-3.69, | <0.001 |
|                                     | 122.41) | 82.43)  | -1.54)  |        | 652.47)  | 574.77)  | -0.28)  |        | 940.68)  | 391.09)  | -1.96)  |        | 74.74)  | 43.99) | -2.47)  |        |
|                                     | 36.06   | 27.49   | -1.09   |        | 466.35   | 420.56   | -0.33   |        | 441.29   | 264.75   | -2.11   |        | 7.17    | 4.04   | -2.38   |        |
| Saint Lucia                         | (15.60, | (12.90, | (-1.22, | <0.001 | (383.76, | (354.78, | (-0.42, | <0.001 | (358.61, | (213.32, | (-2.32, | <0.001 | (0.57,  | (0.25, | (-2.62, | <0.001 |
|                                     | 72.34)  | 51.82)  | -0.96)  |        | 562.76)  | 495.33)  | -0.23)  |        | 538.30)  | 325.20)  | -1.91)  |        | 31.65)  | 18.84) | -2.15)  |        |
|                                     | 26.84   | 28.64   | 0.08    |        | 376.39   | 400.80   | 0.24    |        | 408.56   | 267.77   | -1.53   |        | 6.67    | 4.11   | -1.72   |        |
| Saint Vincent and<br>the Grenadines | (8.92,  | (10.57, | (0.00,  | 0.041  | (296.98, | (320.12, | (0.19,  | <0.001 | (323.29, | (202.60, | (-1.82, | <0.001 | (0.32,  | (0.06, | (-2.06, | <0.001 |
|                                     | 64.15)  | 62.62)  | 0.15)   |        | 472.36)  | 495.98)  | 0.28)   |        | 510.87)  | 347.58)  | -1.25)  |        | 34.77)  | 26.04) | -1.38)  |        |
|                                     | 66.92   | 52.88   | -0.96   |        | 575.92   | 524.84   | -0.34   |        | 972.48   | 916.79   | -0.39   |        | 15.17   | 14.29  | -0.43   |        |
| Samoa                               | (39.87, | (32.23, | (-1.01, | <0.001 | (490.09, | (454.23, | (-0.39, | <0.001 | (859.98, | (822.61, | (-0.52, | <0.001 | (4.22,  | (4.84, | (-0.58, | <0.001 |
|                                     | 106.73) | 82.32)  | -0.91)  |        | 673.56)  | 603.72)  | -0.28)  |        | 1096.69) | 1019.21) | -0.25)  |        | 40.23)  | 33.23) | -0.27)  |        |
| San Marino                          | 14.09   | 12.86   | -0.36   | <0.001 | 184.40   | 170.97   | -0.18   | 0.002  | 114.22   | 89.72    | -0.84   | <0.001 | 1.50    | 1.10   | -1.10   | <0.001 |

|                       |                 |                |                |        |                  |                  |                |        |                    |                    |                |        |                |                |                |        |
|-----------------------|-----------------|----------------|----------------|--------|------------------|------------------|----------------|--------|--------------------|--------------------|----------------|--------|----------------|----------------|----------------|--------|
|                       | (0.06, 112.37)  | (0.06, 102.47) | (-0.43, -0.29) |        | (81.42, 360.27)  | (76.46, 331.64)  | (-0.29, -0.08) |        | (38.05, 265.18)    | (27.00, 220.96)    | (-1.06, -0.63) |        | (0.00, 88.78)  | (0.00, 80.52)  | (-1.36, -0.83) |        |
|                       | 51.71           | 54.44          | 0.17           |        | 544.65           | 594.61           | 0.36           |        | 481.15             | 492.99             | -0.24          |        | 7.38           | 7.12           | -0.53          |        |
| Sao Tome and Principe | (22.81, 104.00) | (34.24, 82.48) | (0.12, 0.22)   | <0.001 | (436.79, 673.45) | (522.24, 674.43) | (0.33, 0.39)   | <0.001 | (377.36, 606.63)   | (427.67, 565.72)   | (-0.62, 0.15)  | 0.222  | (0.24, 42.55)  | (1.43, 21.52)  | (-0.95, -0.11) | 0.016  |
|                       | 24.77           | 28.69          | 0.61           |        | 543.62           | 579.19           | 0.53           |        | 325.74             | 297.01             | -0.02          |        | 4.45           | 3.91           | -0.10          |        |
| Saudi Arabia          | (23.19, 26.43)  | (27.72, 29.69) | (0.39, 0.83)   | <0.001 | (536.21, 551.11) | (574.68, 583.73) | (-0.02, 1.08)  | 0.058  | (319.95, 331.61)   | (293.91, 300.14)   | (-0.23, 0.20)  | 0.860  | (3.79, 5.19)   | (3.57, 4.28)   | (-0.36, 0.15)  | 0.413  |
|                       | 39.71           | 31.32          | -0.90          |        | 456.39           | 410.91           | -0.32          |        | 488.91             | 380.13             | -0.65          |        | 7.44           | 5.65           | -0.71          |        |
| Senegal               | (36.07, 43.63)  | (29.22, 33.54) | (-1.05, -0.76) | <0.001 | (443.91, 469.15) | (403.26, 418.69) | (-0.42, -0.22) | <0.001 | (476.02, 502.07)   | (372.77, 387.61)   | (-0.86, -0.44) | <0.001 | (5.91, 9.27)   | (4.77, 6.64)   | (-0.94, -0.48) | <0.001 |
|                       | 32.83           | 22.35          | -1.60          |        | 281.01           | 255.11           | -0.32          |        | 468.47             | 195.93             | -3.36          |        | 7.31           | 2.60           | -3.92          |        |
| Serbia                | (30.26, 35.56)  | (20.05, 24.87) | (-1.69, -1.50) | <0.001 | (273.39, 288.79) | (247.21, 263.23) | (-0.45, -0.20) | <0.001 | (458.60, 478.50)   | (189.02, 203.05)   | (-3.58, -3.14) | <0.001 | (6.13, 8.66)   | (1.87, 3.55)   | (-4.21, -3.64) | <0.001 |
|                       | 42.43           | 36.31          | -0.78          |        | 451.27           | 422.47           | -0.27          |        | 705.04             | 461.52             | -1.86          |        | 11.11          | 6.70           | -2.24          |        |
| Seychelles            | (15.78, 93.82)  | (15.93, 74.12) | (-0.92, -0.64) | <0.001 | (349.41, 575.19) | (341.90, 518.46) | (-0.37, -0.17) | <0.001 | (573.87, 858.48)   | (377.63, 560.70)   | (-2.18, -1.53) | <0.001 | (0.86, 48.88)  | (0.52, 33.08)  | (-2.61, -1.86) | <0.001 |
|                       | 47.39           | 40.84          | -0.53          |        | 500.65           | 465.90           | -0.16          |        | 515.18             | 457.55             | -0.21          |        | 7.81           | 6.89           | -0.23          |        |
| Sierra Leone          | (41.97, 53.34)  | (37.65, 44.24) | (-0.57, -0.48) | <0.001 | (482.71, 519.12) | (455.06, 476.95) | (-0.22, -0.10) | <0.001 | (497.03, 533.86)   | (446.82, 468.48)   | (-0.32, -0.11) | <0.001 | (5.71, 10.47)  | (5.62, 8.37)   | (-0.35, -0.11) | 0.001  |
|                       | 24.08           | 17.36          | -1.36          |        | 205.54           | 171.08           | -0.72          |        | 204.36             | 73.85              | -3.77          |        | 2.94           | 0.70           | -5.43          |        |
| Singapore             | (20.74, 27.83)  | (15.13, 19.92) | (-1.55, -1.17) | <0.001 | (195.56, 215.92) | (163.83, 178.65) | (-0.83, -0.62) | <0.001 | (194.42, 214.70)   | (68.96, 79.07)     | (-4.12, -3.42) | <0.001 | (1.86, 4.44)   | (0.31, 1.50)   | (-5.83, -5.02) | <0.001 |
|                       | 29.13           | 21.25          | -1.26          |        | 249.18           | 203.51           | -0.78          |        | 335.82             | 145.39             | -2.95          |        | 5.09           | 1.82           | -3.60          |        |
| Slovakia              | (26.02, 32.53)  | (18.49, 24.37) | (-1.37, -1.16) | <0.001 | (239.93, 258.72) | (194.92, 212.46) | (-0.88, -0.67) | <0.001 | (325.08, 346.85)   | (138.05, 153.08)   | (-3.11, -2.79) | <0.001 | (3.85, 6.62)   | (1.10, 2.95)   | (-3.81, -3.39) | <0.001 |
|                       | 21.51           | 16.07          | -1.50          |        | 189.70           | 152.14           | -0.83          |        | 251.57             | 82.53              | -4.53          |        | 3.76           | 0.84           | -5.86          |        |
| Slovenia              | (17.28, 26.54)  | (12.07, 21.18) | (-1.76, -1.24) | <0.001 | (176.77, 203.39) | (139.62, 165.69) | (-0.99, -0.68) | <0.001 | (236.62, 267.28)   | (73.14, 92.99)     | (-4.78, -4.28) | <0.001 | (2.15, 6.21)   | (0.17, 2.90)   | (-6.23, -5.50) | <0.001 |
|                       | 71.35           | 58.33          | -0.69          |        | 478.47           | 438.77           | -0.25          |        | 1580.14            | 1615.83            | 0.26           |        | 26.82          | 27.55          | 0.28           |        |
| Solomon Islands       | (49.94, 99.19)  | (45.34, 73.94) | (-0.75, -0.63) | <0.001 | (421.17, 541.77) | (402.07, 477.99) | (-0.38, -0.12) | <0.001 | (1472.32, 1694.05) | (1543.87, 1690.32) | (0.17, 0.35)   | <0.001 | (14.39, 45.96) | (18.85, 38.93) | (0.18, 0.38)   | <0.001 |



|                            |         |         |         |        |          |          |         |        |           |          |         |        |         |        |         |        |
|----------------------------|---------|---------|---------|--------|----------|----------|---------|--------|-----------|----------|---------|--------|---------|--------|---------|--------|
|                            | 45.33   | 35.25   | -1.12   |        | 403.54   | 383.20   | -0.19   |        | 686.69    | 562.22   | -0.77   |        | 10.92   | 8.76   | -0.84   |        |
| Somalia                    | (41.50, | (33.28, | (-1.25, | <0.001 | (392.02, | (376.76, | (-0.29, | 0.001  | (671.66,  | (554.48, | (-0.95, | <0.001 | (9.09,  | (7.80, | (-1.03, | <0.001 |
|                            | 49.44)  | 37.30)  | -0.98)  |        | 415.33)  | 389.73)  | -0.08)  |        | 701.99)   | 570.05)  | -0.59)  |        | 13.02)  | 9.80)  | -0.64)  |        |
|                            | 36.99   | 22.81   | -2.17   |        | 477.73   | 422.07   | -0.63   |        | 572.51    | 293.30   | -3.12   |        | 9.18    | 4.27   | -3.48   |        |
| South Africa               | (35.58, | (21.98, | (-2.52, | <0.001 | (472.67, | (418.45, | (-0.74, | <0.001 | (566.84,  | (290.31, | (-4.00, | <0.001 | (8.47,  | (3.91, | (-4.47, | <0.001 |
|                            | 38.45)  | 23.67)  | -1.81)  |        | 482.83)  | 425.73)  | -0.52)  |        | 578.22)   | 296.31)  | -2.23)  |        | 9.94)   | 4.64)  | -2.48)  |        |
|                            | 33.82   | 28.28   | -0.76   |        | 394.39   | 388.35   | -0.08   |        | 419.67    | 309.60   | -1.36   |        | 6.37    | 4.46   | -1.59   |        |
| South Sudan                | (30.31, | (25.47, | (-0.86, | <0.001 | (382.35, | (377.79, | (-0.17, | 0.071  | (407.27,  | (300.23, | (-1.65, | <0.001 | (4.91,  | (3.39, | (-1.91, | <0.001 |
|                            | 37.64)  | 31.33)  | -0.66)  |        | 406.74)  | 399.14)  | 0.01)   |        | 432.38)   | 319.20)  | -1.07)  |        | 8.17)   | 5.77)  | -1.26)  |        |
|                            | 19.89   | 11.61   | -2.58   |        | 227.53   | 186.89   | -0.85   |        | 316.19    | 86.90    | -5.14   |        | 4.80    | 1.02   | -6.26   |        |
| Spain                      | (18.88, | (10.81, | (-2.86, | <0.001 | (224.08, | (183.67, | (-0.99, | <0.001 | (312.15,  | (84.72,  | (-5.52, | <0.001 | (4.31,  | (0.80, | (-6.62, | <0.001 |
|                            | 20.94)  | 12.45)  | -2.29)  |        | 231.01)  | 190.15)  | -0.72)  |        | 320.28)   | 89.14)   | -4.76)  |        | 5.33)   | 1.29)  | -5.90)  |        |
|                            | 25.68   | 23.66   | -0.41   |        | 349.90   | 345.68   | 0.00    |        | 342.16    | 281.97   | -0.62   |        | 4.77    | 3.74   | -0.81   |        |
| Sri Lanka                  | (24.05, | (22.17, | (-0.51, | <0.001 | (343.81, | (339.92, | (-0.14, | 0.979  | (336.13,  | (276.78, | (-1.03, | 0.004  | (4.08,  | (3.17, | (-1.32, | 0.003  |
|                            | 27.39)  | 25.22)  | -0.32)  |        | 356.08)  | 351.52)  | 0.14)   |        | 348.27)   | 287.24)  | -0.22)  |        | 5.55)   | 4.40)  | -0.31)  |        |
|                            | 45.31   | 43.13   | -0.21   |        | 430.27   | 443.50   | 0.18    |        | 634.18    | 454.48   | -1.08   |        | 9.98    | 6.76   | -1.27   |        |
| Sudan                      | (42.98, | (41.64, | (-0.30, | <0.001 | (423.10, | (438.74, | (0.09,  | <0.001 | (625.45,  | (449.69, | (-1.22, | <0.001 | (8.90,  | (6.18, | (-1.43, | <0.001 |
|                            | 47.74)  | 44.67)  | -0.13)  |        | 437.54)  | 448.31)  | 0.26)   |        | 643.00)   | 459.32)  | -0.95)  |        | 11.16)  | 7.38)  | -1.12)  |        |
|                            | 36.85   | 32.08   | -0.63   |        | 429.69   | 433.45   | 0.03    |        | 582.34    | 433.00   | -1.45   |        | 9.56    | 6.98   | -1.53   |        |
| Suriname                   | (23.84, | (22.24, | (-0.70, | <0.001 | (383.16, | (394.77, | (-0.04, | 0.382  | (527.07,  | (394.33, | (-1.81, | <0.001 | (3.68,  | (2.90, | (-1.91, | <0.001 |
|                            | 54.88)  | 44.88)  | -0.56)  |        | 480.77)  | 474.95)  | 0.10)   |        | 642.24)   | 474.49)  | -1.10)  |        | 20.84)  | 14.20) | -1.15)  |        |
|                            | 16.51   | 17.04   | 0.29    |        | 354.63   | 481.08   | 1.38    |        | 159.12    | 97.93    | -1.64   |        | 1.96    | 0.65   | -3.89   |        |
| Sweden                     | (14.54, | (15.13, | (0.02,  | 0.038  | (345.25, | (470.61, | (1.11,  | <0.001 | (152.89,  | (93.27,  | (-1.92, | <0.001 | (1.33,  | (0.33, | (-4.14, | <0.001 |
|                            | 18.68)  | 19.16)  | 0.56)   |        | 364.20)  | 491.74)  | 1.65)   |        | 165.56)   | 102.79)  | -1.35)  |        | 2.81)   | 1.18)  | -3.65)  |        |
|                            | 14.29   | 11.76   | -0.82   |        | 174.59   | 154.17   | -0.45   |        | 132.09    | 47.82    | -4.17   |        | 1.79    | 0.39   | -6.21   |        |
| Switzerland                | (12.38, | (10.09, | (-0.95, | <0.001 | (167.81, | (148.01, | (-0.59, | <0.001 | (126.16,  | (44.39,  | (-4.50, | <0.001 | (1.17,  | (0.15, | (-6.60, | <0.001 |
|                            | 16.44)  | 13.68)  | -0.68)  |        | 181.61)  | 160.57)  | -0.30)  |        | 138.25)   | 51.47)   | -3.84)  |        | 2.68)   | 0.92)  | -5.82)  |        |
|                            | 67.95   | 44.86   | -1.76   |        | 622.31   | 518.79   | -0.76   |        | 1162.96   | 601.64   | -2.62   |        | 18.05   | 8.87   | -2.87   |        |
| Syrian Arab Republic       | (64.45, | (41.91, | (-1.96, | <0.001 | (611.47, | (508.57, | (-0.83, | <0.001 | (1148.62, | (590.78, | (-3.00, | <0.001 | (16.29, | (7.59, | (-3.28, | <0.001 |
|                            | 71.60)  | 47.99)  | -1.55)  |        | 633.32)  | 529.19)  | -0.70)  |        | ,         | 612.69)  | -2.24)  |        | 19.98)  | 10.34) | -2.46)  |        |
|                            |         |         |         |        |          |          |         |        | 1177.45)  |          |         |        |         |        |         |        |
| Taiwan (Province of China) | 29.32   | 24.28   | -0.72   |        | 290.93   | 274.89   | -0.22   |        | 395.39    | 250.61   | -1.84   |        | 5.95    | 3.55   | -2.08   |        |
|                            | (27.80, | (22.84, | (-0.80, | <0.001 | (286.11, | (269.97, | (-0.31, | <0.001 | (389.78,  | (246.04, | (-1.98, | <0.001 | (5.28,  | (3.03, | (-2.25, | <0.001 |

|                     |          |          |         |        |          |          |         |        |          |          |         |        |          |          |         |        |
|---------------------|----------|----------|---------|--------|----------|----------|---------|--------|----------|----------|---------|--------|----------|----------|---------|--------|
|                     | 30.89)   | 25.81)   | -0.64)  |        | 295.80)  | 279.90)  | -0.13)  |        | 401.06)  | 255.25)  | -1.69)  |        | 6.69)    | 4.14)    | -1.90)  |        |
|                     | 29.78)   | 26.13)   | -0.38)  |        | 220.40)  | 200.08)  | -0.28)  |        | 253.71)  | 212.76)  | -1.94)  |        | 3.74)    | 3.03)    | -2.26)  |        |
| Tajikistan          | (26.30,  | (23.91,  | (-0.64, | 0.005  | (210.65, | (193.84, | (-0.46, | 0.004  | (243.19, | (206.32, | (-2.36, | <0.001 | (2.55,   | (2.30,   | (-2.74, | <0.001 |
|                     | 33.63)   | 28.50)   | -0.13)  |        | 230.50)  | 206.48)  | -0.10)  |        | 264.60)  | 219.35)  | -1.52)  |        | 5.33)    | 3.92)    | -1.78)  |        |
|                     | 40.72)   | 37.41)   | -0.69)  |        | 381.61)  | 345.30)  | -0.54)  |        | 566.53)  | 687.61)  | -0.81)  |        | 8.74)    | 10.90)   | -0.85)  |        |
| Thailand            | (39.59,  | (36.36,  | (-0.88, | <0.001 | (378.14, | (342.09, | (-0.68, | <0.001 | (562.26, | (683.08, | (-1.50, | 0.025  | (8.22,   | (10.34,  | (-1.60, | 0.028  |
|                     | 41.88)   | 38.49)   | -0.51)  |        | 385.12)  | 348.54)  | -0.41)  |        | 570.83)  | 692.16)  | -0.11)  |        | 9.30)    | 11.48)   | -0.10)  |        |
|                     | 51.40)   | 52.71)   | 0.19)   |        | 453.00)  | 475.44)  | 0.29)   |        | 420.94)  | 558.43)  | 1.37)   |        | 6.00)    | 8.19)    | 1.54)   |        |
| Timor-Leste         | (40.52,  | (43.36,  | (0.10,  | <0.001 | (419.48, | (446.43, | (0.22,  | <0.001 | (388.45, | (527.14, | (1.09,  | <0.001 | (2.70,   | (4.77,   | (1.21,  | <0.001 |
|                     | 64.43)   | 63.62)   | 0.28)   |        | 488.60)  | 505.96)  | 0.36)   |        | 455.53)  | 591.21)  | 1.66)   |        | 11.67)   | 13.28)   | 1.86)   |        |
|                     | 43.52)   | 38.50)   | -0.48)  |        | 479.93)  | 455.38)  | -0.14)  |        | 528.56)  | 478.11)  | -0.43)  |        | 8.09)    | 7.27)    | -0.47)  |        |
| Togo                | (38.10,  | (35.28,  | (-0.57, | <0.001 | (461.59, | (444.19, | (-0.20, | <0.001 | (509.36, | (466.64, | (-0.62, | <0.001 | (5.85,   | (5.91,   | (-0.68, | <0.001 |
|                     | 49.55)   | 41.96)   | -0.38)  |        | 498.85)  | 466.79)  | -0.09)  |        | 548.34)  | 489.81)  | -0.24)  |        | 10.96)   | 8.86)    | -0.26)  |        |
|                     | 59.04)   | 47.02)   | -0.89)  |        | 538.32)  | 487.06)  | -0.38)  |        | 878.02)  | 686.19)  | -0.86)  |        | 13.61)   | 10.39)   | -0.93)  |        |
| Tokelau             | (0.00,   | (0.00,   | (-0.95, | <0.001 | (33.97,  | (19.73,  | (-0.40, | <0.001 | (131.08, | (60.27,  | (-0.97, | <0.001 | (0.00,   | (0.00,   | (-1.04, | <0.001 |
|                     | 1695.37) | 1886.38) | -0.83)  |        | 2519.14) | 2638.44) | -0.36)  |        | 3050.63) | 2954.87) | -0.76)  |        | 1610.11) | 1819.17) | -0.81)  |        |
|                     | )        | )        | )       |        | )        | )        | )       |        | )        | )        | )       |        | )        | )        | )       |        |
|                     | 37.86)   | 37.81)   | -0.00)  |        | 436.09)  | 444.51)  | 0.10)   |        | 372.19)  | 411.18)  | 0.43)   |        | 5.12)    | 5.66)    | 0.37)   |        |
| Tonga               | (12.87,  | (14.38,  | (-0.12, | 0.981  | (333.94, | (349.07, | (0.02,  | 0.015  | (277.66, | (320.35, | (0.30,  | <0.001 | (0.03,   | (0.12,   | (0.20,  | <0.001 |
|                     | 90.55)   | 81.90)   | 0.12)   |        | 562.45)  | 558.78)  | 0.18)   |        | 491.26)  | 520.70)  | 0.57)   |        | 42.96)   | 34.66)   | 0.54)   |        |
|                     | 36.98)   | 29.83)   | -0.83)  |        | 484.66)  | 453.24)  | -0.25)  |        | 442.26)  | 261.26)  | -1.90)  |        | 6.96)    | 3.89)    | -2.12)  |        |
| Trinidad and Tobago | (29.69,  | (23.80,  | (-0.96, | <0.001 | (457.44, | (428.12, | (-0.29, | <0.001 | (416.28, | (242.45, | (-2.16, | <0.001 | (4.05,   | (1.93,   | (-2.42, | <0.001 |
|                     | 45.57)   | 37.08)   | -0.70)  |        | 513.13)  | 479.57)  | -0.21)  |        | 469.48)  | 281.26)  | -1.64)  |        | 11.22)   | 7.19)    | -1.83)  |        |
|                     | 25.76)   | 26.37)   | 0.10)   |        | 241.98)  | 291.12)  | 0.28)   |        | 260.45)  | 222.44)  | -0.83)  |        | 3.87)    | 3.10)    | -1.05)  |        |
| Tunisia             | (23.29,  | (24.30,  | (0.05,  | 0.001  | (234.29, | (284.16, | (0.14,  | <0.001 | (252.45, | (216.38, | (-0.93, | <0.001 | (2.94,   | (2.43,   | (-1.16, | <0.001 |
|                     | 28.44)   | 28.57)   | 0.15)   |        | 249.88)  | 298.22)  | 0.41)   |        | 268.66)  | 228.65)  | -0.73)  |        | 5.02)    | 3.92)    | -0.95)  |        |
|                     | 28.60)   | 26.33)   | -0.27)  |        | 375.86)  | 349.95)  | -0.16)  |        | 262.81)  | 174.87)  | -1.43)  |        | 3.69)    | 2.17)    | -1.93)  |        |
| Turkey              | (27.64,  | (25.59,  | (-0.35, | <0.001 | (372.35, | (347.23, | (-0.22, | <0.001 | (259.86, | (172.95, | (-1.71, | <0.001 | (3.34,   | (1.96,   | (-2.30, | <0.001 |
|                     | 29.60)   | 27.09)   | -0.19)  |        | 379.39)  | 352.68)  | -0.11)  |        | 265.80)  | 176.81)  | -1.14)  |        | 4.06)    | 2.40)    | -1.56)  |        |
|                     | 39.27)   | 60.12)   | 1.39)   |        | 297.71)  | 394.12)  | 0.83)   |        | 404.57)  | 729.67)  | 1.89)   |        | 6.19)    | 11.59)   | 2.04)   |        |
| Turkmenistan        | (34.63,  | (55.64,  | (1.10,  | <0.001 | (284.69, | (382.51, | (0.67,  | <0.001 | (389.33, | (713.80, | (1.30,  | <0.001 | (4.42,   | (9.67,   | (1.40,  | <0.001 |
|                     | 44.38)   | 64.88)   | 1.69)   |        | 311.21)  | 406.01)  | 0.99)   |        | 420.28)  | 745.81)  | 2.49)   |        | 8.46)    | 13.81)   | 2.68)   |        |
| Tuvalu              | 74.12)   | 60.46)   | -0.75)  | <0.001 | 567.99)  | 512.03)  | -0.35)  | <0.001 | 1507.09) | 1343.97) | -0.16)  | 0.010  | 24.50)   | 21.87)   | -0.15)  | 0.023  |

|                    |         |         |         |        |          |          |         |        |           |           |         |        |         |         |         |        |
|--------------------|---------|---------|---------|--------|----------|----------|---------|--------|-----------|-----------|---------|--------|---------|---------|---------|--------|
|                    | (3.12,  | (4.12,  | (-0.79, |        | (261.62, | (268.09, | (-0.38, |        | (968.62,  | (922.68,  | (-0.27, |        | (0.00,  | (0.03,  | (-0.27, |        |
|                    | 379.51) | 271.84) | -0.72)  |        | 1081.16) | 892.00)  | -0.32)  |        | 2243.89)  | 1896.49)  | -0.04)  |        | 293.38) | 206.52) | -0.02)  |        |
|                    | 32.22   | 25.19   | -1.28   |        | 373.49   | 355.17   | -0.29   |        | 446.65    | 424.72    | -1.14   |        | 6.85    | 6.45    | -1.25   |        |
| Uganda             | (30.04, | (23.96, | (-1.50, | <0.001 | (366.08, | (350.58, | (-0.40, | <0.001 | (438.56,  | (419.74,  | (-1.52, | <0.001 | (5.87,  | (5.84,  | (-1.65, | <0.001 |
|                    | 34.53)  | 26.46)  | -1.07)  |        | 381.02)  | 359.81)  | -0.19)  |        | 454.86)   | 429.75)   | -0.76)  |        | 7.97)   | 7.11)   | -0.85)  |        |
|                    | 34.16   | 43.60   | 0.98    |        | 311.38   | 349.89   | 0.44    |        | 314.91    | 597.56    | 1.89    |        | 4.55    | 9.54    | 2.14    |        |
| Ukraine            | (33.02, | (42.19, | (0.84,  | <0.001 | (307.91, | (345.82, | (0.32,  | <0.001 | (311.43,  | (592.33,  | (1.25,  | <0.001 | (4.14,  | (8.90,  | (1.42,  | <0.001 |
|                    | 35.33)  | 45.05)  | 1.12)   |        | 314.87)  | 354.00)  | 0.56)   |        | 318.42)   | 602.83)   | 2.53)   |        | 4.99)   | 10.22)  | 2.86)   |        |
|                    | 34.92   | 34.75   | 0.05    |        | 490.93   | 483.14   | -0.04   |        | 345.49    | 268.30    | -0.71   |        | 4.86    | 3.58    | -0.81   |        |
| United Arab        | (30.60, | (32.35, | (-0.01, | 0.110  | (474.13, | (473.30, | (-0.15, | 0.520  | (331.30,  | (261.56,  | (-1.01, | <0.001 | (3.34,  | (2.89,  | (-1.19, | <0.001 |
| Emirates           | 39.91)  | 37.37)  | 0.11)   |        | 508.37)  | 493.21)  | 0.08)   |        | 360.33)   | 275.26)   | -0.40)  |        | 7.12)   | 4.49)   | -0.43)  |        |
|                    | 16.10   | 11.79   | -1.31   |        | 206.43   | 174.38   | -0.64   |        | 179.83    | 106.89    | -2.07   |        | 2.59    | 1.40    | -2.44   |        |
| United Kingdom     | (15.34, | (11.17, | (-1.44, | <0.001 | (203.69, | (171.98, | (-0.81, | <0.001 | (177.28,  | (105.02,  | (-2.22, | <0.001 | (2.29,  | (1.19,  | (-2.61, | <0.001 |
|                    | 16.89)  | 12.44)  | -1.19)  |        | 209.19)  | 176.82)  | -0.47)  |        | 182.41)   | 108.78)   | -1.91)  |        | 2.91)   | 1.63)   | -2.27)  |        |
|                    | 28.26   | 25.16   | -0.53   |        | 357.99   | 371.56   | 0.19    |        | 537.50    | 388.30    | -1.63   |        | 8.40    | 5.77    | -1.88   |        |
| United Republic of | (26.61, | (24.15, | (-0.71, | <0.001 | (352.09, | (367.67, | (0.04,  | 0.014  | (530.30,  | (384.36,  | (-1.94, | <0.001 | (7.51,  | (5.29,  | (-2.21, | <0.001 |
| Tanzania           | 30.00)  | 26.20)  | -0.36)  |        | 363.96)  | 375.47)  | 0.34)   |        | 544.78)   | 392.28)   | -1.32)  |        | 9.37)   | 6.27)   | -1.54)  |        |
|                    | 15.70   | 15.16   | -0.33   |        | 288.89   | 364.57   | 1.51    |        | 175.73    | 137.01    | -0.46   |        | 2.36    | 1.52    | -1.27   |        |
| United States of   | (15.36, | (14.84, | (-0.51, | 0.001  | (287.44, | (363.00, | (0.97,  | <0.001 | (174.61,  | (136.05,  | (-0.60, | <0.001 | (2.23,  | (1.43,  | (-1.46, | <0.001 |
| America            | 16.04)  | 15.48)  | -0.15)  |        | 290.34)  | 366.15)  | 2.05)   |        | 176.86)   | 137.97)   | -0.33)  |        | 2.49)   | 1.63)   | -1.09)  |        |
|                    | 24.57   | 23.10   | -0.38   |        | 341.49   | 343.51   | 0.05    |        | 302.58    | 159.29    | -3.18   |        | 4.77    | 2.30    | -3.05   |        |
| United States      | (7.42,  | (5.51,  | (-0.45, | <0.001 | (262.41, | (255.40, | (0.01,  | 0.028  | (228.32,  | (101.89,  | (-4.08, | <0.001 | (0.08,  | (0.00,  | (-4.06, | <0.001 |
| Virgin Islands     | 60.61)  | 64.94)  | -0.30)  |        | 437.49)  | 453.14)  | 0.09)   |        | 393.88)   | 238.53)   | -2.26)  |        | 30.44)  | 31.97)  | -2.02)  |        |
|                    | 22.61   | 18.19   | -1.15   |        | 231.18   | 220.00   | -0.40   |        | 442.66    | 194.27    | -3.03   |        | 7.05    | 2.76    | -3.44   |        |
| Uruguay            | (18.82, | (14.95, | (-1.32, | <0.001 | (218.69, | (208.31, | (-0.54, | <0.001 | (425.34,  | (183.30,  | (-3.30, | <0.001 | (5.01,  | (1.60,  | (-3.74, | <0.001 |
|                    | 26.93)  | 21.94)  | -0.98)  |        | 244.19)  | 232.18)  | -0.27)  |        | 460.52)   | 205.73)   | -2.75)  |        | 9.64)   | 4.45)   | -3.14)  |        |
|                    | 34.57   | 32.84   | 0.00    |        | 271.60   | 294.31   | 0.27    |        | 362.39    | 393.66    | 0.29    |        | 5.55    | 6.00    | 0.27    |        |
| Uzbekistan         | (32.73, | (31.52, | (-0.06, | 0.911  | (266.39, | (290.34, | (0.21,  | <0.001 | (356.34,  | (389.06,  | (-0.05, | 0.088  | (4.81,  | (5.44,  | (-0.12, | 0.173  |
|                    | 36.49)  | 34.20)  | 0.07)   |        | 276.89)  | 298.32)  | 0.34)   |        | 368.52)   | 398.29)   | 0.62)   |        | 6.36)   | 6.60)   | 0.66)   |        |
|                    | 95.45   | 84.01   | -0.52   |        | 684.36   | 637.38   | -0.25   |        | 1710.14   | 1882.07   | -0.01   |        | 27.90   | 30.87   | -0.02   |        |
| Vanuatu            | (61.52, | (61.19, | (-0.55, | <0.001 | (587.52, | (571.55, | (-0.29, | <0.001 | (1554.64, | (1767.76, | (-0.11, | 0.831  | (11.35, | (17.78, | (-0.12, | 0.765  |
|                    | 141.84) | 112.77) | -0.49)  |        | 793.05)  | 708.93)  | -0.21)  |        | 1877.38)  | 2002.04)  | 0.09)   |        | 57.65)  | 50.10)  | 0.09)   |        |

|              |         |         |         |        |          |          |         |        |          |          |         |        |         |        |         |        |
|--------------|---------|---------|---------|--------|----------|----------|---------|--------|----------|----------|---------|--------|---------|--------|---------|--------|
| Venezuela    | 27.47   | 22.19   | -0.86   |        | 396.72   | 360.52   | -0.27   |        | 353.69   | 217.97   | -2.22   |        | 5.55    | 3.27   | -2.44   |        |
| (Bolivarian  | (25.81, | (20.94, | (-0.99, | <0.001 | (390.38, | (355.40, | (-0.39, | <0.001 | (347.66, | (214.02, | (-2.59, | <0.001 | (4.81,  | (2.80, | (-2.82, | <0.001 |
| Republic of) | 29.22)  | 23.50)  | -0.72)  |        | 403.15)  | 365.71)  | -0.15)  |        | 359.81)  | 221.99)  | -1.84)  |        | 6.37)   | 3.79)  | -2.05)  |        |
|              | 44.29   | 36.84   | -0.68   |        | 378.42   | 385.16   | 0.17    |        | 676.44   | 519.84   | -0.39   |        | 10.75   | 7.89   | -0.47   |        |
| Viet Nam     | (43.09, | (36.03, | (-0.87, | <0.001 | (374.97, | (382.51, | (-0.05, | 0.118  | (671.77, | (516.75, | (-0.65, | 0.006  | (10.17, | (7.52, | (-0.78, | 0.004  |
|              | 45.50)  | 37.67)  | -0.49)  |        | 381.89)  | 387.84)  | 0.38)   |        | 681.14)  | 522.93)  | -0.12)  |        | 11.37)  | 8.28)  | -0.17)  |        |
|              | 44.11   | 38.00   | -0.53   |        | 423.02   | 402.79   | -0.12   |        | 503.84   | 408.23   | -0.78   |        | 7.91    | 6.15   | -0.95   |        |
| Yemen        | (41.23, | (36.46, | (-0.54, | <0.001 | (414.05, | (397.79, | (-0.19, | 0.006  | (493.91, | (403.17, | (-0.91, | <0.001 | (6.70,  | (5.54, | (-1.10, | <0.001 |
|              | 47.16)  | 39.58)  | -0.53)  |        | 432.14)  | 407.83)  | -0.04)  |        | 513.93)  | 413.33)  | -0.65)  |        | 9.28)   | 6.81)  | -0.81)  |        |
|              | 24.79   | 23.02   | -0.45   |        | 335.36   | 336.94   | 0.01    |        | 431.30   | 473.46   | -0.07   |        | 6.58    | 7.38   | -0.03   |        |
| Zambia       | (22.02, | (21.41, | (-0.58, | <0.001 | (325.03, | (330.75, | (-0.08, | 0.801  | (419.71, | (466.10, | (-0.33, | 0.602  | (5.20,  | (6.48, | (-0.30, | 0.836  |
|              | 27.85)  | 24.72)  | -0.33)  |        | 345.95)  | 343.23)  | 0.10)   |        | 443.15)  | 480.91)  | 0.19)   |        | 8.25)   | 8.38)  | 0.25)   |        |
|              | 20.07   | 26.47   | 0.67    |        | 293.98   | 345.89   | 0.38    |        | 246.30   | 373.11   | 1.16    |        | 3.47    | 5.50   | 1.21    |        |
| Zimbabwe     | (17.92, | (24.56, | (0.09,  | 0.026  | (285.62, | (338.92, | (0.18,  | 0.001  | (238.80, | (365.96, | (0.38,  | 0.005  | (2.62,  | (4.66, | (0.32,  | 0.009  |
|              | 22.42)  | 28.49)  | 1.25)   |        | 302.53)  | 352.98)  | 0.58)   |        | 253.99)  | 380.37)  | 1.95)   |        | 4.52)   | 6.46)  | 2.11)   |        |

**Hypertensive  
heart disease  
Overall**

|                |   |   |   |   |         |         |         |        |          |          |         |        |        |        |         |        |
|----------------|---|---|---|---|---------|---------|---------|--------|----------|----------|---------|--------|--------|--------|---------|--------|
|                |   |   |   |   | 13.10   | 15.45   | 0.57    |        | 192.42   | 134.81   | -1.22   |        | 3.41   | 2.39   | -1.22   |        |
| Afghanistan    | — | — | — | — | (11.71, | (14.71, | (0.54,  | <0.001 | (187.14, | (132.64, | (-1.39, | <0.001 | (2.73, | (2.11, | (-1.39, | <0.001 |
|                |   |   |   |   | 14.62)  | 16.22)  | 0.60)   |        | 197.84)  | 137.01)  | -1.04)  |        | 4.21)  | 2.70)  | -1.06)  |        |
|                |   |   |   |   | 1.82    | 1.58    | -0.48   |        | 9.13     | 7.29     | -0.88   |        | 0.15   | 0.12   | -0.82   |        |
| Albania        | — | — | — | — | (1.15,  | (0.88,  | (-0.54, | <0.001 | (7.59,   | (5.69,   | (-1.46, | 0.003  | (0.02, | (0.01, | (-1.69, | 0.064  |
|                |   |   |   |   | 2.74)   | 2.62)   | -0.43)  |        | 10.90)   | 9.21)    | -0.30)  |        | 0.58)  | 0.64)  | 0.05)   |        |
|                |   |   |   |   | 17.93   | 18.32   | 0.08    |        | 89.36    | 42.33    | -2.56   |        | 1.55   | 0.72   | -2.62   |        |
| Algeria        | — | — | — | — | (17.01, | (17.72, | (0.04,  | <0.001 | (87.34,  | (41.39,  | (-2.76, | <0.001 | (1.29, | (0.60, | (-2.86, | <0.001 |
|                |   |   |   |   | 18.90)  | 18.95)  | 0.11)   |        | 91.41)   | 43.29)   | -2.37)  |        | 1.84)  | 0.85)  | -2.38)  |        |
|                |   |   |   |   | 6.31    | 6.44    | 0.07    |        | 48.69    | 42.04    | -0.47   |        | 0.87   | 0.75   | -0.41   |        |
| American Samoa | — | — | — | — | (0.20,  | (0.22,  | (0.05,  | <0.001 | (21.59,  | (17.37,  | (-0.67, | <0.001 | (0.00, | (0.00, | (-0.72, | 0.011  |
|                |   |   |   |   | 34.63)  | 34.91)  | 0.08)   |        | 95.25)   | 86.28)   | -0.27)  |        | 24.96) | 24.79) | -0.09)  |        |
|                |   |   |   |   | 4.63    | 3.36    | -1.10   |        | 7.91     | 6.01     | -0.91   |        | 0.13   | 0.10   | -0.89   |        |
| Andorra        | — | — | — | — | (0.23,  | (0.08,  | (-1.18, | <0.001 | (1.04,   | (0.57,   | (-1.00, | <0.001 | (0.00, | (0.00, | (-1.45, | 0.002  |
|                |   |   |   |   | 27.44)  | 24.36)  | -1.03)  |        | 32.40)   | 28.34)   | -0.82)  |        | 20.65) | 19.42) | -0.33)  |        |

|                     |   |   |   |   |        |        |         |        |          |          |         |        |        |        |         |        |
|---------------------|---|---|---|---|--------|--------|---------|--------|----------|----------|---------|--------|--------|--------|---------|--------|
|                     |   |   |   |   | 4.10   | 4.37   | 0.22    |        | 93.34    | 55.17    | -1.80   |        | 1.67   | 0.98   | -1.83   |        |
| Angola              | — | — | — | — | (3.43, | (3.95, | (0.19,  | <0.001 | (90.11,  | (53.68,  | (-2.61, | <0.001 | (1.26, | (0.79, | (-2.63, | <0.001 |
|                     |   |   |   |   | 4.85)  | 4.83)  | 0.25)   |        | 96.66)   | 56.69)   | -0.99)  |        | 2.17)  | 1.21)  | -1.02)  |        |
| Antigua and Barbuda | — | — | — | — | 10.50  | 10.14  | -0.11   |        | 51.97    | 39.77    | -0.86   |        | 0.92   | 0.70   | -0.91   |        |
|                     |   |   |   |   | (1.76, | (2.56, | (-0.14, | <0.001 | (27.29,  | (21.91,  | (-2.39, | 0.277  | (0.00, | (0.00, | (-2.44, | 0.252  |
|                     |   |   |   |   | 34.25) | 27.90) | -0.09)  |        | 90.29)   | 67.03)   | 0.70)   |        | 18.32) | 13.09) | 0.65)   |        |
| Argentina           | — | — | — | — | 1.53   | 2.25   | 1.39    |        | 23.95    | 13.78    | -1.88   |        | 0.42   | 0.24   | -1.99   |        |
|                     |   |   |   |   | (1.31, | (2.03, | (1.20,  | <0.001 | (23.08,  | (13.24,  | (-2.18, | <0.001 | (0.31, | (0.17, | (-2.44, | <0.001 |
|                     |   |   |   |   | 1.77)  | 2.48)  | 1.59)   |        | 24.84)   | 14.34)   | -1.58)  |        | 0.55)  | 0.32)  | -1.53)  |        |
|                     |   |   |   |   | 1.44   | 1.46   | 0.05    |        | 4.22     | 4.12     | -0.01   |        | 0.07   | 0.07   | -0.22   |        |
| Armenia             | — | — | — | — | (0.89, | (0.88, | (-0.06, | 0.363  | (3.21,   | (3.04,   | (-1.03, | 0.985  | (0.00, | (0.00, | (-1.53, | 0.743  |
|                     |   |   |   |   | 2.23)  | 2.37)  | 0.16)   |        | 5.44)    | 5.52)    | 1.02)   |        | 0.42)  | 0.59)  | 1.11)   |        |
|                     |   |   |   |   | 2.39   | 1.69   | -1.19   |        | 3.36     | 2.61     | -0.86   |        | 0.06   | 0.04   | -1.45   |        |
| Australia           | — | — | — | — | (2.05, | (1.44, | (-1.27, | <0.001 | (2.95,   | (2.29,   | (-1.14, | <0.001 | (0.02, | (0.01, | (-3.09, | 0.088  |
|                     |   |   |   |   | 2.78)  | 1.98)  | -1.10)  |        | 3.82)    | 2.97)    | -0.57)  |        | 0.15)  | 0.12)  | 0.22)   |        |
|                     |   |   |   |   | 3.91   | 2.61   | -1.39   |        | 5.72     | 4.90     | -0.58   |        | 0.09   | 0.08   | -0.61   |        |
| Austria             | — | — | — | — | (3.24, | (2.08, | (-1.46, | <0.001 | (4.89,   | (4.15,   | (-0.76, | <0.001 | (0.02, | (0.01, | (-1.67, | 0.260  |
|                     |   |   |   |   | 4.69)  | 3.26)  | -1.32)  |        | 6.65)    | 5.78)    | -0.41)  |        | 0.30)  | 0.30)  | 0.46)   |        |
|                     |   |   |   |   | 3.14   | 3.08   | -0.07   |        | 47.40    | 30.78    | -1.68   |        | 0.83   | 0.53   | -1.78   |        |
| Azerbaijan          | — | — | — | — | (2.51, | (2.60, | (-0.13, | 0.037  | (44.93,  | (29.16,  | (-3.17, | 0.030  | (0.53, | (0.33, | (-3.35, | 0.028  |
|                     |   |   |   |   | 3.89)  | 3.64)  | -0.00)  |        | 49.98)   | 32.49)   | -0.16)  |        | 1.24)  | 0.80)  | -0.19)  |        |
|                     |   |   |   |   | 10.25  | 10.08  | -0.05   |        | 147.89   | 162.60   | 0.29    |        | 2.65   | 2.92   | 0.29    |        |
| Bahamas             | — | — | — | — | (5.08, | (5.71, | (-0.09, | 0.044  | (125.56, | (143.07, | (-0.50, | 0.479  | (0.50, | (0.88, | (-0.56, | 0.501  |
|                     |   |   |   |   | 18.62) | 16.59) | -0.00)  |        | 173.18)  | 184.13)  | 1.08)   |        | 8.30)  | 7.25)  | 1.14)   |        |
|                     |   |   |   |   | 11.79  | 11.69  | -0.04   |        | 28.27    | 15.92    | -1.92   |        | 0.45   | 0.25   | -1.99   |        |
| Bahrain             | — | — | — | — | (8.12, | (9.43, | (-0.10, | 0.205  | (22.02,  | (12.88,  | (-2.35, | <0.001 | (0.02, | (0.02, | (-2.65, | <0.001 |
|                     |   |   |   |   | 16.90) | 14.52) | 0.02)   |        | 35.99)   | 19.59)   | -1.49)  |        | 2.88)  | 1.34)  | -1.33)  |        |
|                     |   |   |   |   | 2.48   | 2.68   | 0.27    |        | 41.12    | 21.21    | -2.18   |        | 0.73   | 0.37   | -2.22   |        |
| Bangladesh          | — | — | — | — | (2.31, | (2.55, | (0.24,  | <0.001 | (40.46,  | (20.85,  | (-2.51, | <0.001 | (0.64, | (0.33, | (-2.63, | <0.001 |
|                     |   |   |   |   | 2.65)  | 2.81)  | 0.29)   |        | 41.79)   | 21.56)   | -1.85)  |        | 0.82)  | 0.42)  | -1.81)  |        |
|                     |   |   |   |   | 5.93   | 5.87   | -0.03   |        | 27.27    | 22.76    | -0.68   |        | 0.48   | 0.40   | -0.66   |        |
| Barbados            | — | — | — | — | (2.28, | (2.21, | (-0.06, | 0.018  | (18.37,  | (14.57,  | (-1.23, | 0.014  | (0.00, | (0.00, | (-0.97, | <0.001 |
|                     |   |   |   |   | 12.66) | 12.89) | -0.01)  |        | 39.07)   | 34.09)   | -0.14)  |        | 4.50)  | 4.78)  | -0.35)  |        |

|                   |   |   |   |   |        |        |         |        |         |         |         |        |        |        |         |        |
|-------------------|---|---|---|---|--------|--------|---------|--------|---------|---------|---------|--------|--------|--------|---------|--------|
|                   |   |   |   |   | 0.44   | 0.45   | 0.09    |        | 12.96   | 7.01    | -2.22   |        | 0.24   | 0.13   | -2.20   |        |
| Belarus           | — | — | — | — | (0.26, | (0.26, | (-0.04, | 0.166  | (11.90, | (6.19,  | (-3.29, | <0.001 | (0.11, | (0.04, | (-2.97, | <0.001 |
|                   |   |   |   |   | 0.70)  | 0.75)  | 0.21)   |        | 14.09)  | 7.93)   | -1.14)  |        | 0.45)  | 0.35)  | -1.42)  |        |
|                   |   |   |   |   | 2.73   | 2.06   | -0.97   |        | 3.75    | 2.18    | -1.89   |        | 0.06   | 0.03   | -2.42   |        |
| Belgium           | — | — | — | — | (2.24, | (1.63, | (-1.02, | <0.001 | (3.15,  | (1.73,  | (-2.37, | <0.001 | (0.01, | (0.00, | (-3.75, | <0.001 |
|                   |   |   |   |   | 3.30)  | 2.58)  | -0.92)  |        | 4.42)   | 2.73)   | -1.41)  |        | 0.22)  | 0.19)  | -1.07)  |        |
|                   |   |   |   |   | 6.66   | 6.81   | 0.08    |        | 32.59   | 47.84   | 1.34    |        | 0.57   | 0.84   | 1.32    |        |
| Belize            | — | — | — | — | (1.71, | (3.40, | (0.03,  | 0.001  | (19.71, | (37.85, | (0.70,  | <0.001 | (0.00, | (0.05, | (0.59,  | <0.001 |
|                   |   |   |   |   | 18.03) | 12.23) | 0.12)   |        | 51.20)  | 59.71)  | 1.99)   |        | 8.40)  | 3.89)  | 2.05)   |        |
|                   |   |   |   |   | 6.73   | 6.89   | 0.07    |        | 58.35   | 76.83   | 0.97    |        | 1.03   | 1.35   | 0.96    |        |
| Benin             | — | — | — | — | (5.44, | (6.09, | (0.03,  | <0.001 | (54.50, | (74.17, | (0.77,  | <0.001 | (0.57, | (1.01, | (0.75,  | <0.001 |
|                   |   |   |   |   | 8.24)  | 7.77)  | 0.11)   |        | 62.41)  | 79.57)  | 1.17)   |        | 1.71)  | 1.76)  | 1.18)   |        |
|                   |   |   |   |   | 4.42   | 4.31   | -0.08   |        | 12.80   | 7.76    | -1.70   |        | 0.22   | 0.13   | -1.74   |        |
| Bermuda           | — | — | — | — | (0.23, | (0.09, | (-0.11, | <0.001 | (3.17,  | (0.66,  | (-1.97, | <0.001 | (0.00, | (0.00, | (-2.04, | <0.001 |
|                   |   |   |   |   | 26.77) | 32.73) | -0.06)  |        | 38.86)  | 38.01)  | -1.42)  |        | 20.57) | 26.41) | -1.45)  |        |
|                   |   |   |   |   | 1.32   | 1.44   | 0.31    |        | 24.91   | 13.71   | -2.03   |        | 0.44   | 0.24   | -2.04   |        |
| Bhutan            | — | — | — | — | (0.23, | (0.46, | (0.26,  | <0.001 | (18.50, | (10.09, | (-2.15, | <0.001 | (0.01, | (0.00, | (-2.21, | <0.001 |
|                   |   |   |   |   | 4.30)  | 3.41)  | 0.36)   |        | 32.91)  | 18.23)  | -1.91)  |        | 2.90)  | 1.60)  | -1.86)  |        |
| Bolivia           |   |   |   |   | 1.43   | 1.60   | 0.38    |        | 56.33   | 30.32   | -2.11   |        | 0.97   | 0.52   | -2.11   |        |
| (Plurinational    | — | — | — | — | (1.00, | (1.27, | (0.29,  | <0.001 | (53.27, | (28.77, | (-2.28, | <0.001 | (0.61, | (0.34, | (-2.38, | <0.001 |
| State of)         |   |   |   |   | 2.01)  | 1.99)  | 0.47)   |        | 59.52)  | 31.94)  | -1.94)  |        | 1.48)  | 0.78)  | -1.84)  |        |
|                   |   |   |   |   | 3.33   | 2.84   | -0.54   |        | 16.79   | 10.50   | -1.62   |        | 0.29   | 0.18   | -1.78   |        |
| Bosnia and        | — | — | — | — | (2.57, | (1.95, | (-0.62, | <0.001 | (15.02, | (8.68,  | (-2.48, | <0.001 | (0.10, | (0.02, | (-2.37, | <0.001 |
| Herzegovina       |   |   |   |   | 4.24)  | 4.03)  | -0.45)  |        | 18.71)  | 12.63)  | -0.77)  |        | 0.65)  | 0.72)  | -1.20)  |        |
|                   |   |   |   |   | 2.08   | 2.07   | -0.03   |        | 62.52   | 57.98   | -0.25   |        | 1.13   | 1.04   | -0.27   |        |
| Botswana          | — | — | — | — | (0.91, | (1.31, | (-0.08, | 0.171  | (55.04, | (53.56, | (-0.52, | 0.073  | (0.34, | (0.53, | (-0.51, | 0.028  |
|                   |   |   |   |   | 4.11)  | 3.13)  | 0.02)   |        | 70.77)  | 62.68)  | 0.02)   |        | 2.80)  | 1.86)  | -0.03)  |        |
|                   |   |   |   |   | 1.73   | 2.43   | 1.18    |        | 49.09   | 24.57   | -2.34   |        | 0.88   | 0.44   | -2.37   |        |
| Brazil            | — | — | — | — | (1.62, | (2.33, | (1.09,  | <0.001 | (48.51, | (24.25, | (-2.53, | <0.001 | (0.81, | (0.39, | (-2.59, | <0.001 |
|                   |   |   |   |   | 1.84)  | 2.53)  | 1.28)   |        | 49.67)  | 24.90)  | -2.14)  |        | 0.96)  | 0.48)  | -2.14)  |        |
|                   |   |   |   |   | 8.67   | 7.33   | -0.59   |        | 61.71   | 29.23   | -2.61   |        | 1.04   | 0.50   | -2.55   |        |
| Brunei Darussalam | — | — | — | — | (4.25, | (4.21, | (-0.63, | <0.001 | (48.58, | (22.42, | (-3.03, | <0.001 | (0.05, | (0.02, | (-2.99, | <0.001 |
|                   |   |   |   |   | 15.82) | 12.11) | -0.55)  |        | 77.40)  | 37.64)  | -2.18)  |        | 5.15)  | 3.06)  | -2.11)  |        |

|                          |   |   |   |   |         |         |         |        |          |         |         |        |        |        |         |        |
|--------------------------|---|---|---|---|---------|---------|---------|--------|----------|---------|---------|--------|--------|--------|---------|--------|
|                          |   |   |   |   | 7.06    | 6.00    | -0.55   |        | 44.28    | 90.44   | 2.46    |        | 0.78   | 1.61   | 2.48    |        |
| Bulgaria                 | — | — | — | — | (6.17,  | (5.06,  | (-0.58, | <0.001 | (41.99,  | (86.59, | (2.01,  | <0.001 | (0.51, | (1.14, | (2.02,  | <0.001 |
|                          |   |   |   |   | 8.05)   | 7.09)   | -0.52)  |        | 46.67)   | 94.45)  | 2.92)   |        | 1.16)  | 2.26)  | 2.95)   |        |
|                          |   |   |   |   | 5.85    | 6.01    | 0.09    |        | 56.83    | 75.51   | 1.06    |        | 1.01   | 1.34   | 1.03    |        |
| Burkina Faso             | — | — | — | — | (4.94,  | (5.45,  | (0.07,  | <0.001 | (53.97,  | (73.53, | (0.69,  | <0.001 | (0.66, | (1.08, | (0.73,  | <0.001 |
|                          |   |   |   |   | 6.88)   | 6.61)   | 0.11)   |        | 59.82)   | 77.54)  | 1.42)   |        | 1.49)  | 1.63)  | 1.33)   |        |
|                          |   |   |   |   | 7.22    | 7.50    | 0.13    |        | 124.06   | 63.63   | -2.30   |        | 2.20   | 1.12   | -2.35   |        |
| Burundi                  | — | — | — | — | (6.01,  | (6.66,  | (0.10,  | <0.001 | (118.94, | (61.19, | (-2.54, | <0.001 | (1.57, | (0.82, | (-2.62, | <0.001 |
|                          |   |   |   |   | 8.62)   | 8.41)   | 0.16)   |        | 129.35)  | 66.15)  | -2.06)  |        | 3.03)  | 1.50)  | -2.07)  |        |
|                          |   |   |   |   | 8.67    | 8.93    | 0.11    |        | 93.56    | 39.82   | -2.96   |        | 1.65   | 0.68   | -3.07   |        |
| Cabo Verde               | — | — | — | — | (3.69,  | (5.61,  | (0.09,  | <0.001 | (75.16,  | (32.37, | (-3.32, | <0.001 | (0.12, | (0.06, | (-3.47, | <0.001 |
|                          |   |   |   |   | 17.66)  | 13.55)  | 0.12)   |        | 115.46)  | 48.52)  | -2.60)  |        | 7.66)  | 2.80)  | -2.66)  |        |
|                          |   |   |   |   | 6.26    | 6.88    | 0.33    |        | 63.99    | 37.86   | -1.77   |        | 1.14   | 0.67   | -1.77   |        |
| Cambodia                 | — | — | — | — | (5.41,  | (6.28,  | (0.29,  | <0.001 | (61.24,  | (36.43, | (-1.93, | <0.001 | (0.80, | (0.49, | (-1.87, | <0.001 |
|                          |   |   |   |   | 7.22)   | 7.53)   | 0.36)   |        | 66.84)   | 39.34)  | -1.62)  |        | 1.59)  | 0.90)  | -1.68)  |        |
|                          |   |   |   |   | 4.18    | 5.39    | 0.85    |        | 67.68    | 78.61   | 0.54    |        | 1.20   | 1.39   | 0.52    |        |
| Cameroon                 | — | — | — | — | (3.48,  | (4.94,  | (0.76,  | <0.001 | (64.84,  | (76.92, | (0.35,  | <0.001 | (0.84, | (1.17, | (0.40,  | <0.001 |
|                          |   |   |   |   | 4.97)   | 5.86)   | 0.94)   |        | 70.63)   | 80.32)  | 0.74)   |        | 1.66)  | 1.63)  | 0.64)   |        |
|                          |   |   |   |   | 21.28   | 13.50   | -1.55   |        | 5.55     | 5.70    | 0.10    |        | 0.06   | 0.08   | 0.82    |        |
| Canada                   | — | — | — | — | (20.48, | (12.87, | (-1.60, | <0.001 | (5.14,   | (5.29,  | (-0.12, | 0.375  | (0.03, | (0.04, | (-0.22, | 0.124  |
|                          |   |   |   |   | 22.11)  | 14.15)  | -1.50)  |        | 5.99)    | 6.14)   | 0.32)   |        | 0.13)  | 0.15)  | 1.87)   |        |
|                          |   |   |   |   | 3.13    | 2.89    | -0.27   |        | 104.03   | 91.82   | -0.43   |        | 1.87   | 1.65   | -0.43   |        |
| Central African Republic | — | — | — | — | (2.04,  | (2.14,  | (-0.31, | <0.001 | (97.27,  | (87.40, | (-0.68, | 0.001  | (1.06, | (1.10, | (-0.68, | 0.001  |
|                          |   |   |   |   | 4.63)   | 3.83)   | -0.23)  |        | 111.15)  | 96.42)  | -0.18)  |        | 3.08)  | 2.38)  | -0.18)  |        |
|                          |   |   |   |   | 5.86    | 6.03    | 0.10    |        | 59.97    | 85.27   | 1.30    |        | 1.06   | 1.50   | 1.29    |        |
| Chad                     | — | — | — | — | (4.77,  | (5.32,  | (0.07,  | <0.001 | (56.42,  | (82.61, | (0.87,  | <0.001 | (0.63, | (1.17, | (0.86,  | <0.001 |
|                          |   |   |   |   | 7.14)   | 6.81)   | 0.13)   |        | 63.70)   | 88.00)  | 1.73)   |        | 1.67)  | 1.91)  | 1.72)   |        |
|                          |   |   |   |   | 1.98    | 4.48    | 2.86    |        | 8.48     | 8.99    | 0.22    |        | 0.15   | 0.15   | 0.10    |        |
| Chile                    | — | — | — | — | (1.63,  | (4.00,  | (2.76,  | <0.001 | (7.72,   | (8.30,  | (-0.17, | 0.264  | (0.06, | (0.08, | (-0.26, | 0.588  |
|                          |   |   |   |   | 2.38)   | 5.00)   | 2.96)   |        | 9.29)    | 9.72)   | 0.60)   |        | 0.29)  | 0.28)  | 0.46)   |        |
|                          |   |   |   |   | 10.98   | 12.55   | 0.45    |        | 51.64    | 19.66   | -3.29   |        | 0.89   | 0.33   | -3.33   |        |
| China                    | — | — | — | — | (10.89, | (12.46, | (0.39,  | <0.001 | (51.45,  | (19.55, | (-3.95, | <0.001 | (0.86, | (0.31, | (-3.62, | <0.001 |
|                          |   |   |   |   | 11.07)  | 12.64)  | 0.50)   |        | 51.84)   | 19.78)  | -2.63)  |        | 0.91)  | 0.34)  | -3.03)  |        |

|                   |   |   |   |   |         |         |         |        |          |          |         |        |        |        |         |        |
|-------------------|---|---|---|---|---------|---------|---------|--------|----------|----------|---------|--------|--------|--------|---------|--------|
|                   |   |   |   |   | 3.20    | 3.89    | 0.67    |        | 26.42    | 9.61     | -3.39   |        | 0.46   | 0.16   | -3.61   |        |
| Colombia          | — | — | — | — | (2.90,  | (3.61,  | (0.64,  | <0.001 | (25.53,  | (9.18,   | (-3.63, | <0.001 | (0.35, | (0.11, | (-3.91, | <0.001 |
|                   |   |   |   |   | 3.53)   | 4.18)   | 0.71)   |        | 27.33)   | 10.06)   | -3.14)  |        | 0.60)  | 0.23)  | -3.30)  |        |
|                   |   |   |   |   | 9.64    | 10.05   | 0.14    |        | 105.74   | 61.62    | -1.87   |        | 1.88   | 1.08   | -1.92   |        |
| Comoros           | — | — | — | — | (5.03,  | (6.61,  | (0.13,  | <0.001 | (89.03,  | (52.67,  | (-4.10, | 0.108  | (0.31, | (0.22, | (-4.11, | 0.093  |
|                   |   |   |   |   | 16.84)  | 14.66)  | 0.15)   |        | 124.80)  | 71.69)   | 0.42)   |        | 6.28)  | 3.24)  | 0.32)   |        |
|                   |   |   |   |   | 4.07    | 4.11    | 0.04    |        | 117.61   | 66.81    | -1.97   |        | 2.12   | 1.20   | -1.98   |        |
| Congo             | — | — | — | — | (2.73,  | (3.27,  | (0.01,  | 0.004  | (109.94, | (63.31,  | (-2.79, | <0.001 | (1.20, | (0.77, | (-2.80, | <0.001 |
|                   |   |   |   |   | 5.85)   | 5.09)   | 0.07)   |        | 125.69)  | 70.47)   | -1.14)  |        | 3.48)  | 1.78)  | -1.16)  |        |
|                   |   |   |   |   | 27.29   | 27.73   | 0.05    |        | 322.97   | 223.19   | -1.26   |        | 5.76   | 3.98   | -1.26   |        |
| Cook Islands      | — | — | — | — | (2.92,  | (2.20,  | (0.04,  | <0.001 | (202.73, | (118.04, | (-1.45, | <0.001 | (0.00, | (0.00, | (-1.44, | <0.001 |
|                   |   |   |   |   | 107.17) | 116.23) | 0.07)   |        | 491.04)  | 384.38)  | -1.08)  |        | 71.25) | 74.48) | -1.09)  |        |
|                   |   |   |   |   | 2.15    | 3.02    | 1.18    |        | 11.60    | 12.03    | -0.01   |        | 0.20   | 0.21   | -0.00   |        |
| Costa Rica        | — | — | — | — | (1.39,  | (2.31,  | (1.14,  | <0.001 | (9.73,   | (10.56,  | (-0.44, | 0.982  | (0.03, | (0.06, | (-0.53, | 0.993  |
|                   |   |   |   |   | 3.17)   | 3.90)   | 1.23)   |        | 13.74)   | 13.66)   | 0.43)   |        | 0.69)  | 0.55)  | 0.53)   |        |
|                   |   |   |   |   | 6.09    | 6.01    | -0.04   |        | 58.79    | 78.29    | 1.08    |        | 1.03   | 1.37   | 1.09    |        |
| Cote d'Ivoire     | — | — | — | — | (5.33,  | (5.54,  | (-0.09, | 0.079  | (56.43,  | (76.58,  | (0.69,  | <0.001 | (0.73, | (1.15, | (0.68,  | <0.001 |
|                   |   |   |   |   | 6.94)   | 6.52)   | 0.01)   |        | 61.22)   | 80.04)   | 1.48)   |        | 1.40)  | 1.62)  | 1.50)   |        |
|                   |   |   |   |   | 3.11    | 1.84    | -1.80   |        | 9.93     | 6.27     | -1.59   |        | 0.17   | 0.11   | -1.62   |        |
| Croatia           | — | — | — | — | (2.39,  | (1.21,  | (-1.89, | <0.001 | (8.58,   | (5.05,   | (-2.39, | <0.001 | (0.04, | (0.01, | (-2.74, | 0.005  |
|                   |   |   |   |   | 4.00)   | 2.74)   | -1.70)  |        | 11.44)   | 7.73)    | -0.78)  |        | 0.50)  | 0.55)  | -0.49)  |        |
|                   |   |   |   |   | 4.59    | 4.41    | -0.14   |        | 13.28    | 16.53    | 0.71    |        | 0.23   | 0.29   | 0.79    |        |
| Cuba              | — | — | — | — | (3.97,  | (3.77,  | (-0.17, | <0.001 | (12.20,  | (15.26,  | (0.29,  | 0.001  | (0.11, | (0.15, | (0.51,  | <0.001 |
|                   |   |   |   |   | 5.30)   | 5.14)   | -0.11)  |        | 14.43)   | 17.88)   | 1.14)   |        | 0.43)  | 0.53)  | 1.08)   |        |
|                   |   |   |   |   | 1.22    | 0.95    | -0.87   |        | 2.16     | 1.48     | -1.31   |        | 0.04   | 0.02   | -2.33   |        |
| Cyprus            | — | — | — | — | (0.32,  | (0.34,  | (-1.03, | <0.001 | (0.85,   | (0.63,   | (-1.89, | <0.001 | (0.00, | (0.00, | (-2.33, | <0.001 |
|                   |   |   |   |   | 3.27)   | 2.50)   | -0.72)  |        | 4.60)    | 3.25)    | -0.72)  |        | 1.40)  | 1.27)  | -2.33)  |        |
|                   |   |   |   |   | 2.72    | 2.25    | -0.65   |        | 6.44     | 8.17     | 0.95    |        | 0.11   | 0.14   | 0.90    |        |
| Czechia           | — | — | — | — | (2.24,  | (1.80,  | (-0.71, | <0.001 | (5.67,   | (7.26,   | (0.14,  | 0.021  | (0.03, | (0.05, | (-0.05, | 0.062  |
|                   |   |   |   |   | 3.28)   | 2.80)   | -0.59)  |        | 7.28)    | 9.18)    | 1.77)   |        | 0.28)  | 0.37)  | 1.85)   |        |
| Democratic        |   |   |   |   | 5.36    | 5.14    | -0.15   |        | 31.35    | 30.72    | -0.05   |        | 0.54   | 0.53   | -0.04   |        |
| People's Republic | — | — | — | — | (4.85,  | (4.72,  | (-0.18, | <0.001 | (30.11,  | (29.67,  | (-0.12, | 0.115  | (0.39, | (0.40, | (-0.17, | 0.497  |
| of Korea          |   |   |   |   | 5.92)   | 5.59)   | -0.12)  |        | 32.63)   | 31.81)   | 0.01)   |        | 0.74)  | 0.69)  | 0.08)   |        |



|                   |   |   |   |   |         |         |         |        |          |         |         |        |        |        |         |        |
|-------------------|---|---|---|---|---------|---------|---------|--------|----------|---------|---------|--------|--------|--------|---------|--------|
| Democratic        |   |   |   |   | 4.35    | 4.27    | -0.06   |        | 81.41    | 64.08   | -0.82   |        | 1.46   | 1.15   | -0.81   |        |
| Republic of the   | — | — | — | — | (3.97,  | (4.03,  | (-0.08, | <0.001 | (79.78,  | (63.16, | (-0.92, | <0.001 | (1.25, | (1.03, | (-0.91, | <0.001 |
| Congo             |   |   |   |   | 4.75)   | 4.51)   | -0.04)  |        | 83.07)   | 65.01)  | -0.71)  |        | 1.70)  | 1.28)  | -0.71)  |        |
|                   |   |   |   |   | 1.27    | 0.87    | -1.32   |        | 2.49     | 1.37    | -2.13   |        | 0.04   | 0.02   | -2.34   |        |
| Denmark           | — | — | — | — | (0.82,  | (0.50,  | (-1.43, | <0.001 | (1.85,   | (0.89,  | (-2.62, | <0.001 | (0.00, | (0.00, | (-2.34, | <0.001 |
|                   |   |   |   |   | 1.88)   | 1.42)   | -1.20)  |        | 3.30)    | 2.03)   | -1.65)  |        | 0.29)  | 0.28)  | -2.34)  |        |
|                   |   |   |   |   | 9.45    | 9.56    | 0.04    |        | 93.60    | 52.99   | -1.94   |        | 1.67   | 0.93   | -2.00   |        |
| Djibouti          | — | — | — | — | (5.22,  | (7.09,  | (-0.01, | 0.099  | (79.14,  | (46.91, | (-2.40, | <0.001 | (0.29, | (0.30, | (-2.45, | <0.001 |
|                   |   |   |   |   | 15.81)  | 12.63)  | 0.09)   |        | 110.04)  | 59.66)  | -1.49)  |        | 5.39)  | 2.24)  | -1.55)  |        |
|                   |   |   |   |   | 7.01    | 6.86    | -0.07   |        | 84.78    | 79.75   | -0.17   |        | 1.51   | 1.42   | -0.17   |        |
| Dominica          | — | — | — | — | (0.63,  | (0.67,  | (-0.08, | <0.001 | (52.34,  | (48.99, | (-0.52, | 0.351  | (0.00, | (0.00, | (-0.56, | 0.389  |
|                   |   |   |   |   | 28.78)  | 26.87)  | -0.06)  |        | 130.44)  | 122.73) | 0.19)   |        | 19.39) | 17.47) | 0.22)   |        |
|                   |   |   |   |   | 6.48    | 6.84    | 0.19    |        | 48.68    | 47.24   | -0.09   |        | 0.85   | 0.83   | -0.07   |        |
| Dominican         | — | — | — | — | (5.52,  | (6.08,  | (0.16,  | <0.001 | (46.04,  | (45.23, | (-0.38, | 0.565  | (0.53, | (0.58, | (-0.41, | 0.696  |
| Republic          |   |   |   |   | 7.56)   | 7.66)   | 0.21)   |        | 51.44)   | 49.32)  | 0.21)   |        | 1.29)  | 1.14)  | 0.27)   |        |
|                   |   |   |   |   | 2.29    | 5.04    | 2.74    |        | 62.33    | 48.59   | -1.03   |        | 1.08   | 0.83   | -1.03   |        |
| Ecuador           | — | — | — | — | (1.85,  | (4.52,  | (2.63,  | <0.001 | (59.81,  | (46.97, | (-1.68, | 0.002  | (0.77, | (0.63, | (-1.78, | 0.007  |
|                   |   |   |   |   | 2.82)   | 5.59)   | 2.86)   |        | 64.93)   | 50.25)  | -0.37)  |        | 1.47)  | 1.07)  | -0.28)  |        |
|                   |   |   |   |   | 12.99   | 13.78   | 0.20    |        | 123.06   | 78.26   | -1.53   |        | 2.09   | 1.32   | -1.55   |        |
| Egypt             | — | — | — | — | (12.48, | (13.42, | (0.16,  | <0.001 | (121.54, | (77.40, | (-1.86, | <0.001 | (1.90, | (1.21, | (-1.89, | <0.001 |
|                   |   |   |   |   | 13.52)  | 14.15)  | 0.24)   |        | 124.60)  | 79.13)  | -1.21)  |        | 2.31)  | 1.44)  | -1.22)  |        |
|                   |   |   |   |   | 1.31    | 2.50    | 2.30    |        | 29.20    | 17.15   | -1.84   |        | 0.50   | 0.30   | -1.75   |        |
| El Salvador       | — | — | — | — | (0.84,  | (1.90,  | (2.15,  | <0.001 | (26.75,  | (15.53, | (-2.20, | <0.001 | (0.23, | (0.12, | (-2.11, | <0.001 |
|                   |   |   |   |   | 1.96)   | 3.23)   | 2.44)   |        | 31.83)   | 18.90)  | -1.47)  |        | 0.98)  | 0.62)  | -1.39)  |        |
|                   |   |   |   |   | 3.61    | 4.35    | 0.65    |        | 108.53   | 36.25   | -3.69   |        | 1.95   | 0.64   | -3.79   |        |
| Equatorial Guinea | — | — | — | — | (1.09,  | (2.70,  | (0.58,  | <0.001 | (91.24,  | (31.20, | (-4.03, | <0.001 | (0.32, | (0.14, | (-4.18, | <0.001 |
|                   |   |   |   |   | 8.87)   | 6.67)   | 0.72)   |        | 128.22)  | 41.93)  | -3.35)  |        | 6.42)  | 1.89)  | -3.38)  |        |
|                   |   |   |   |   | 6.60    | 7.52    | 0.46    |        | 141.64   | 87.43   | -1.66   |        | 2.55   | 1.56   | -1.68   |        |
| Eritrea           | — | — | — | — | (5.03,  | (6.46,  | (0.42,  | <0.001 | (134.10, | (83.76, | (-1.83, | <0.001 | (1.62, | (1.11, | (-1.85, | <0.001 |
|                   |   |   |   |   | 8.50)   | 8.70)   | 0.49)   |        | 149.51)  | 91.23)  | -1.49)  |        | 3.82)  | 2.15)  | -1.51)  |        |
|                   |   |   |   |   | 1.92    | 1.95    | 0.06    |        | 10.05    | 29.61   | 3.76    |        | 0.18   | 0.54   | 3.78    |        |
| Estonia           | — | — | — | — | (0.99,  | (0.91,  | (0.03,  | <0.001 | (7.71,   | (24.99, | (2.90,  | <0.001 | (0.01, | (0.10, | (2.97,  | <0.001 |
|                   |   |   |   |   | 3.42)   | 3.93)   | 0.10)   |        | 12.93)   | 35.02)  | 4.64)   |        | 1.04)  | 2.08)  | 4.60)   |        |

|          |   |   |   |   |        |        |         |        |          |         |         |        |        |        |         |        |
|----------|---|---|---|---|--------|--------|---------|--------|----------|---------|---------|--------|--------|--------|---------|--------|
|          |   |   |   |   | 1.94   | 1.86   | -0.14   |        | 66.27    | 81.33   | 0.68    | 1.20   | 1.46   | 0.64   |         |        |
| Eswatini | — | — | — | — | (0.56, | (0.82, | (-0.18, | <0.001 | (56.11,  | (73.23, | (0.11,  | 0.019  | (0.22, | (0.57, | (0.09,  | 0.023  |
|          |   |   |   |   | 4.90)  | 3.65)  | -0.10)  |        | 77.80)   | 90.09)  | 1.25)   |        | 3.81)  | 3.11)  | 1.19)   |        |
|          |   |   |   |   | 7.07   | 8.03   | 0.44    |        | 150.42   | 44.25   | -4.13   |        | 2.69   | 0.78   | -4.18   |        |
| Ethiopia | — | — | — | — | (6.65, | (7.73, | (0.42,  | <0.001 | (148.48, | (43.57, | (-4.30, | <0.001 | (2.44, | (0.69, | (-4.39, | <0.001 |
|          |   |   |   |   | 7.51)  | 8.33)  | 0.46)   |        | 152.37)  | 44.94)  | -3.95)  |        | 2.97)  | 0.88)  | -3.97)  |        |
|          |   |   |   |   | 10.11  | 10.05  | -0.02   |        | 112.89   | 88.68   | -0.85   |        | 2.01   | 1.57   | -0.87   |        |
| Fiji     | — | — | — | — | (6.78, | (7.07, | (-0.03, | 0.004  | (101.07, | (79.29, | (-0.99, | <0.001 | (0.72, | (0.56, | (-1.02, | <0.001 |
|          |   |   |   |   | 14.53) | 13.88) | -0.01)  |        | 125.75)  | 98.89)  | -0.71)  |        | 4.46)  | 3.50)  | -0.71)  |        |
|          |   |   |   |   | 2.81   | 1.74   | -1.65   |        | 6.63     | 6.70    | -0.03   |        | 0.12   | 0.12   | -0.13   |        |
| Finland  | — | — | — | — | (2.13, | (1.19, | (-1.74, | <0.001 | (5.57,   | (5.59,  | (-0.45, | 0.881  | (0.02, | (0.02, | (-0.99, | 0.766  |
|          |   |   |   |   | 3.66)  | 2.48)  | -1.56)  |        | 7.86)    | 8.00)   | 0.39)   |        | 0.44)  | 0.46)  | 0.74)   |        |
|          |   |   |   |   | 2.34   | 1.47   | -1.61   |        | 2.67     | 1.71    | -1.58   |        | 0.04   | 0.03   | -0.97   |        |
| France   | — | — | — | — | (2.14, | (1.31, | (-1.67, | <0.001 | (2.46,   | (1.54,  | (-1.76, | <0.001 | (0.02, | (0.01, | (-0.97, | <0.001 |
|          |   |   |   |   | 2.54)  | 1.64)  | -1.55)  |        | 2.89)    | 1.90)   | -1.41)  |        | 0.08)  | 0.06)  | -0.97)  |        |
|          |   |   |   |   | 4.71   | 4.63   | -0.07   |        | 84.40    | 51.87   | -1.66   |        | 1.52   | 0.93   | -1.68   |        |
| Gabon    | — | — | — | — | (2.63, | (3.14, | (-0.10, | <0.001 | (74.66,  | (46.59, | (-1.99, | <0.001 | (0.48, | (0.35, | (-2.08, | <0.001 |
|          |   |   |   |   | 7.82)  | 6.59)  | -0.04)  |        | 95.08)   | 57.59)  | -1.33)  |        | 3.64)  | 2.00)  | -1.29)  |        |
|          |   |   |   |   | 7.34   | 7.40   | 0.02    |        | 46.93    | 77.06   | 2.08    |        | 0.82   | 1.35   | 2.10    |        |
| Gambia   | — | — | — | — | (4.58, | (5.60, | (-0.03, | 0.448  | (39.61,  | (71.09, | (1.47,  | <0.001 | (0.14, | (0.67, | (1.50,  | <0.001 |
|          |   |   |   |   | 11.24) | 9.62)  | 0.07)   |        | 55.28)   | 83.42)  | 2.69)   |        | 2.77)  | 2.47)  | 2.70)   |        |
|          |   |   |   |   | 4.13   | 4.06   | -0.06   |        | 17.39    | 41.58   | 3.07    |        | 0.30   | 0.72   | 3.13    |        |
| Georgia  | — | — | — | — | (3.32, | (3.06, | (-0.10, | 0.012  | (15.68,  | (38.09, | (2.17,  | <0.001 | (0.11, | (0.33, | (2.16,  | <0.001 |
|          |   |   |   |   | 5.08)  | 5.33)  | -0.01)  |        | 19.25)   | 45.34)  | 3.97)   |        | 0.64)  | 1.41)  | 4.11)   |        |
|          |   |   |   |   | 3.90   | 3.53   | -0.35   |        | 15.47    | 6.57    | -2.96   |        | 0.27   | 0.11   | -3.13   |        |
| Germany  | — | — | — | — | (3.69, | (3.32, | (-0.40, | <0.001 | (15.04,  | (6.27,  | (-3.26, | <0.001 | (0.21, | (0.07, | (-3.53, | <0.001 |
|          |   |   |   |   | 4.13)  | 3.76)  | -0.29)  |        | 15.92)   | 6.88)   | -2.66)  |        | 0.33)  | 0.16)  | -2.74)  |        |
|          |   |   |   |   | 3.34   | 3.60   | 0.26    |        | 66.88    | 66.40   | -0.02   |        | 1.18   | 1.18   | 0.00    |        |
| Ghana    | — | — | — | — | (2.84, | (3.27, | (0.19,  | <0.001 | (64.62,  | (64.98, | (-0.20, | 0.829  | (0.90, | (0.99, | (-0.20, | 0.990  |
|          |   |   |   |   | 3.91)  | 3.96)  | 0.34)   |        | 69.20)   | 67.85)  | 0.16)   |        | 1.53)  | 1.38)  | 0.20)   |        |
|          |   |   |   |   | 2.74   | 2.08   | -0.96   |        | 4.96     | 5.56    | 0.40    |        | 0.08   | 0.09   | 0.29    |        |
| Greece   | — | — | — | — | (2.24, | (1.61, | (-1.00, | <0.001 | (4.28,   | (4.77,  | (-0.19, | 0.185  | (0.02, | (0.02, | (-0.89, | 0.628  |
|          |   |   |   |   | 3.32)  | 2.65)  | -0.93)  |        | 5.72)    | 6.46)   | 1.00)   |        | 0.24)  | 0.30)  | 1.49)   |        |

|               |   |   |   |   |         |        |         |        |          |          |         |        |        |        |         |        |
|---------------|---|---|---|---|---------|--------|---------|--------|----------|----------|---------|--------|--------|--------|---------|--------|
|               |   |   |   |   | 32.72   | 24.20  | -1.03   |        | 39.54    | 29.65    | -1.00   |        | 0.67   | 0.51   | -0.92   |        |
| Greenland     | — | — | — | — | (14.78, | (8.10, | (-1.08, | <0.001 | (19.30,  | (11.28,  | (-1.25, | <0.001 | (0.00, | (0.00, | (-1.37, | <0.001 |
|               |   |   |   |   | 66.93)  | 58.55) | -0.97)  |        | 75.87)   | 66.02)   | -0.76)  |        | 23.10) | 23.40) | -0.47)  |        |
|               |   |   |   |   | 5.77    | 5.76   | -0.00   |        | 58.11    | 42.93    | -1.07   |        | 1.04   | 0.77   | -1.07   |        |
| Grenada       | — | — | — | — | (0.50,  | (0.77, | (-0.03, | 0.749  | (33.72,  | (24.50,  | (-1.70, | 0.001  | (0.00, | (0.00, | (-1.72, | 0.001  |
|               |   |   |   |   | 24.12)  | 20.60) | 0.02)   |        | 93.85)   | 70.15)   | -0.43)  |        | 16.03) | 12.24) | -0.41)  |        |
|               |   |   |   |   | 14.73   | 15.28  | 0.13    |        | 107.38   | 93.31    | -0.47   |        | 1.89   | 1.67   | -0.42   |        |
| Guam          | — | — | — | — | (6.74,  | (6.87, | (0.10,  | <0.001 | (83.01,  | (69.92,  | (-1.07, | 0.120  | (0.07, | (0.04, | (-1.02, | 0.173  |
|               |   |   |   |   | 28.18)  | 29.41) | 0.16)   |        | 136.84)  | 122.09)  | 0.12)   |        | 9.91)  | 9.79)  | 0.19)   |        |
|               |   |   |   |   | 0.59    | 1.43   | 3.09    |        | 36.23    | 17.11    | -2.61   |        | 0.63   | 0.29   | -2.69   |        |
| Guatemala     | — | — | — | — | (0.34,  | (1.17, | (3.00,  | <0.001 | (33.95,  | (16.17,  | (-3.51, | <0.001 | (0.36, | (0.18, | (-3.70, | <0.001 |
|               |   |   |   |   | 0.96)   | 1.73)  | 3.18)   |        | 38.64)   | 18.08)   | -1.71)  |        | 1.03)  | 0.45)  | -1.67)  |        |
|               |   |   |   |   | 7.00    | 7.62   | 0.29    |        | 68.59    | 99.45    | 1.34    |        | 1.20   | 1.75   | 1.36    |        |
| Guinea        | — | — | — | — | (5.85,  | (6.78, | (0.24,  | <0.001 | (64.94,  | (96.43,  | (1.12,  | <0.001 | (0.76, | (1.36, | (1.11,  | <0.001 |
|               |   |   |   |   | 8.32)   | 8.53)  | 0.35)   |        | 72.41)   | 102.55)  | 1.55)   |        | 1.82)  | 2.21)  | 1.60)   |        |
|               |   |   |   |   | 5.45    | 5.83   | 0.24    |        | 110.35   | 132.44   | 0.66    |        | 1.96   | 2.35   | 0.67    |        |
| Guinea-Bissau | — | — | — | — | (3.13,  | (4.14, | (0.19,  | <0.001 | (98.98,  | (124.03, | (0.48,  | <0.001 | (0.72, | (1.35, | (0.31,  | <0.001 |
|               |   |   |   |   | 8.86)   | 7.99)  | 0.28)   |        | 122.70)  | 141.29)  | 0.85)   |        | 4.33)  | 3.83)  | 1.03)   |        |
|               |   |   |   |   | 7.91    | 7.92   | 0.01    |        | 153.16   | 175.75   | 0.50    |        | 2.72   | 3.15   | 0.52    |        |
| Guyana        | — | — | — | — | (4.99,  | (4.99, | (-0.03, | 0.729  | (139.29, | (160.73, | (-0.35, | 0.251  | (1.16, | (1.44, | (-0.35, | 0.244  |
|               |   |   |   |   | 11.97)  | 11.97) | 0.04)   |        | 168.08)  | 191.81)  | 1.36)   |        | 5.46)  | 6.02)  | 1.40)   |        |
|               |   |   |   |   | 3.83    | 4.13   | 0.27    |        | 116.85   | 86.78    | -1.01   |        | 2.09   | 1.55   | -1.01   |        |
| Haiti         | — | — | — | — | (3.04,  | (3.59, | (0.22,  | <0.001 | (112.35, | (84.24,  | (-1.35, | <0.001 | (1.52, | (1.23, | (-1.33, | <0.001 |
|               |   |   |   |   | 4.75)   | 4.73)  | 0.31)   |        | 121.48)  | 89.37)   | -0.66)  |        | 2.79)  | 1.93)  | -0.68)  |        |
|               |   |   |   |   | 1.29    | 2.40   | 2.18    |        | 62.75    | 25.62    | -3.06   |        | 1.09   | 0.45   | -2.95   |        |
| Honduras      | — | — | — | — | (0.80,  | (1.94, | (2.09,  | <0.001 | (58.80,  | (24.03,  | (-3.64, | <0.001 | (0.62, | (0.26, | (-3.72, | <0.001 |
|               |   |   |   |   | 2.00)   | 2.94)  | 2.27)   |        | 66.91)   | 27.29)   | -2.49)  |        | 1.78)  | 0.72)  | -2.17)  |        |
|               |   |   |   |   | 3.58    | 2.82   | -0.81   |        | 30.25    | 21.60    | -1.10   |        | 0.54   | 0.39   | -1.07   |        |
| Hungary       | — | — | — | — | (3.03,  | (2.28, | (-0.89, | <0.001 | (28.60,  | (20.03,  | (-1.93, | 0.010  | (0.34, | (0.21, | (-1.66, | 0.001  |
|               |   |   |   |   | 4.21)   | 3.47)  | -0.74)  |        | 31.98)   | 23.27)   | -0.26)  |        | 0.83)  | 0.69)  | -0.47)  |        |
|               |   |   |   |   | 2.67    | 2.08   | -0.87   |        | 3.26     | 2.34     | -1.09   |        | 0.05   | 0.04   | -0.75   |        |
| Iceland       | — | — | — | — | (0.52,  | (0.38, | (-0.97, | <0.001 | (0.77,   | (0.48,   | (-1.31, | <0.001 | (0.00, | (0.00, | (-0.75, | <0.001 |
|               |   |   |   |   | 8.25)   | 7.01)  | -0.77)  |        | 9.14)    | 7.43)    | -0.88)  |        | 3.94)  | 3.83)  | -0.75)  |        |

|                               |   |   |   |   |         |         |         |        |         |         |         |        |        |        |         |        |
|-------------------------------|---|---|---|---|---------|---------|---------|--------|---------|---------|---------|--------|--------|--------|---------|--------|
|                               |   |   |   |   | 1.63    | 1.67    | 0.09    |        | 26.56   | 17.73   | -1.44   |        | 0.47   | 0.32   | -1.32   |        |
| India                         | — | — | — | — | (1.58,  | (1.64,  | (0.07,  | <0.001 | (26.38, | (17.62, | (-1.85, | <0.001 | (0.45, | (0.30, | (-2.05, | <0.001 |
|                               |   |   |   |   | 1.67)   | 1.70)   | 0.10)   |        | 26.74)  | 17.84)  | -1.02)  |        | 0.50)  | 0.33)  | -0.59)  |        |
|                               |   |   |   |   | 12.07   | 12.69   | 0.17    |        | 67.17   | 43.81   | -1.44   |        | 1.18   | 0.77   | -1.44   |        |
| Indonesia                     | — | — | — | — | (11.81, | (12.48, | (0.16,  | <0.001 | (66.56, | (43.42, | (-1.53, | <0.001 | (1.10, | (0.72, | (-1.61, | <0.001 |
|                               |   |   |   |   | 12.34)  | 12.90)  | 0.19)   |        | 67.78)  | 44.20)  | -1.35)  |        | 1.27)  | 0.82)  | -1.27)  |        |
|                               |   |   |   |   | 21.87   | 22.13   | 0.03    |        | 47.20   | 39.58   | -0.61   |        | 0.79   | 0.65   | -0.66   |        |
| Iran (Islamic<br>Republic of) | — | — | — | — | (21.18, | (21.69, | (0.00,  | 0.046  | (46.23, | (38.95, | (-0.83, | <0.001 | (0.67, | (0.57, | (-0.98, | <0.001 |
|                               |   |   |   |   | 22.57)  | 22.58)  | 0.06)   |        | 48.19)  | 40.22)  | -0.38)  |        | 0.93)  | 0.74)  | -0.34)  |        |
|                               |   |   |   |   | 10.96   | 11.26   | 0.08    |        | 37.67   | 20.54   | -2.09   |        | 0.64   | 0.34   | -2.19   |        |
| Iraq                          | — | — | — | — | (10.09, | (10.74, | (0.02,  | 0.008  | (36.07, | (19.86, | (-2.51, | <0.001 | (0.45, | (0.26, | (-2.71, | <0.001 |
|                               |   |   |   |   | 11.90)  | 11.79)  | 0.14)   |        | 39.32)  | 21.24)  | -1.66)  |        | 0.90)  | 0.45)  | -1.68)  |        |
|                               |   |   |   |   | 1.35    | 0.95    | -1.23   |        | 2.48    | 1.54    | -1.65   |        | 0.04   | 0.03   | -1.15   |        |
| Ireland                       | — | — | — | — | (0.80,  | (0.56,  | (-1.32, | <0.001 | (1.71,  | (1.02,  | (-1.90, | <0.001 | (0.00, | (0.00, | (-3.25, | 0.289  |
|                               |   |   |   |   | 2.14)   | 1.55)   | -1.14)  |        | 3.48)   | 2.26)   | -1.40)  |        | 0.37)  | 0.31)  | 0.99)   |        |
|                               |   |   |   |   | 1.85    | 1.39    | -1.00   |        | 8.63    | 1.67    | -5.49   |        | 0.15   | 0.03   | -5.41   |        |
| Israel                        | — | — | — | — | (1.28,  | (1.02,  | (-1.06, | <0.001 | (7.35,  | (1.25,  | (-5.92, | <0.001 | (0.03, | (0.00, | (-6.47, | <0.001 |
|                               |   |   |   |   | 2.58)   | 1.86)   | -0.93)  |        | 10.07)  | 2.17)   | -5.07)  |        | 0.46)  | 0.17)  | -4.33)  |        |
|                               |   |   |   |   | 4.02    | 2.91    | -1.14   |        | 4.83    | 4.13    | -0.58   |        | 0.08   | 0.07   | -0.45   |        |
| Italy                         | — | — | — | — | (3.75,  | (2.67,  | (-1.34, | <0.001 | (4.54,  | (3.84,  | (-0.76, | <0.001 | (0.05, | (0.04, | (-0.45, | <0.001 |
|                               |   |   |   |   | 4.29)   | 3.18)   | -0.93)  |        | 5.13)   | 4.44)   | -0.40)  |        | 0.13)  | 0.12)  | -0.45)  |        |
|                               |   |   |   |   | 7.81    | 8.10    | 0.13    |        | 50.41   | 40.77   | -0.89   |        | 0.88   | 0.72   | -0.85   |        |
| Jamaica                       | — | — | — | — | (5.99,  | (6.53,  | (0.10,  | <0.001 | (45.68, | (37.16, | (-2.77, | 0.364  | (0.36, | (0.31, | (-2.74, | 0.381  |
|                               |   |   |   |   | 10.03)  | 9.93)   | 0.17)   |        | 55.52)  | 44.64)  | 1.04)   |        | 1.84)  | 1.41)  | 1.07)   |        |
|                               |   |   |   |   | 6.69    | 5.63    | -0.59   |        | 7.30    | 2.88    | -3.16   |        | 0.12   | 0.04   | -3.99   |        |
| Japan                         | — | — | — | — | (6.46,  | (5.39,  | (-0.62, | <0.001 | (7.06,  | (2.70,  | (-3.33, | <0.001 | (0.09, | (0.02, | (-4.43, | <0.001 |
|                               |   |   |   |   | 6.93)   | 5.88)   | -0.57)  |        | 7.56)   | 3.06)   | -2.98)  |        | 0.15)  | 0.07)  | -3.54)  |        |
|                               |   |   |   |   | 23.37   | 24.19   | 0.11    |        | 34.02   | 19.39   | -1.91   |        | 0.57   | 0.31   | -2.06   |        |
| Jordan                        | — | — | — | — | (20.53, | (22.80, | (0.07,  | <0.001 | (30.64, | (18.15, | (-2.34, | <0.001 | (0.21, | (0.17, | (-2.67, | <0.001 |
|                               |   |   |   |   | 26.52)  | 25.64)  | 0.14)   |        | 37.69)  | 20.68)  | -1.47)  |        | 1.27)  | 0.52)  | -1.46)  |        |
|                               |   |   |   |   | 1.80    | 1.74    | -0.10   |        | 35.47   | 27.94   | -0.78   |        | 0.63   | 0.50   | -0.76   |        |
| Kazakhstan                    | — | — | — | — | (1.50,  | (1.46,  | (-0.20, | 0.030  | (34.06, | (26.75, | (-1.74, | 0.119  | (0.46, | (0.35, | (-1.73, | 0.129  |
|                               |   |   |   |   | 2.16)   | 2.07)   | -0.01)  |        | 36.92)  | 29.17)  | 0.20)   |        | 0.85)  | 0.70)  | 0.22)   |        |

|              |   |   |   |   |         |         |         |        |         |         |         |        |        |        |         |        |
|--------------|---|---|---|---|---------|---------|---------|--------|---------|---------|---------|--------|--------|--------|---------|--------|
|              |   |   |   |   | 9.07    | 8.67    | -0.18   |        | 58.08   | 48.24   | -0.65   |        | 1.02   | 0.85   | -0.64   |        |
| Kenya        | — | — | — | — | (8.35,  | (8.25,  | (-0.32, | 0.010  | (56.26, | (47.25, | (-0.77, | <0.001 | (0.79, | (0.72, | (-0.79, | <0.001 |
|              |   |   |   |   | 9.85)   | 9.11)   | -0.04)  |        | 59.96)  | 49.25)  | -0.52)  |        | 1.30)  | 0.99)  | -0.49)  |        |
|              |   |   |   |   | 4.31    | 4.52    | 0.16    |        | 128.31  | 112.44  | -0.47   |        | 2.31   | 2.03   | -0.47   |        |
| Kiribati     | — | — | — | — | (0.15,  | (0.57,  | (0.12,  | <0.001 | (88.80, | (83.86, | (-0.54, | <0.001 | (0.01, | (0.04, | (-0.56, | <0.001 |
|              |   |   |   |   | 23.12)  | 16.27)  | 0.20)   |        | 179.91) | 147.75) | -0.40)  |        | 19.67) | 12.18) | -0.38)  |        |
|              |   |   |   |   | 27.81   | 29.21   | 0.17    |        | 55.67   | 28.02   | -2.33   |        | 0.91   | 0.44   | -2.50   |        |
| Kuwait       | — | — | — | — | (24.55, | (27.21, | (0.14,  | <0.001 | (50.85, | (25.84, | (-3.07, | <0.001 | (0.40, | (0.21, | (-3.24, | <0.001 |
|              |   |   |   |   | 31.45)  | 31.38)  | 0.19)   |        | 60.89)  | 30.39)  | -1.58)  |        | 1.89)  | 0.91)  | -1.75)  |        |
|              |   |   |   |   | 1.51    | 1.47    | -0.08   |        | 18.37   | 15.15   | -0.59   |        | 0.33   | 0.27   | -0.61   |        |
| Kyrgyzstan   | — | — | — | — | (0.97,  | (1.04,  | (-0.15, | 0.026  | (16.36, | (13.68, | (-1.07, | 0.015  | (0.11, | (0.11, | (-1.10, | 0.014  |
|              |   |   |   |   | 2.25)   | 2.03)   | -0.01)  |        | 20.58)  | 16.74)  | -0.11)  |        | 0.76)  | 0.56)  | -0.13)  |        |
| Lao People's |   |   |   |   | 5.57    | 6.03    | 0.28    |        | 64.00   | 48.29   | -0.95   |        | 1.14   | 0.85   | -1.00   |        |
| Democratic   | — | — | — | — | (4.35,  | (5.17,  | (0.21,  | <0.001 | (59.73, | (45.82, | (-1.12, | <0.001 | (0.64, | (0.55, | (-1.17, | <0.001 |
| Republic     |   |   |   |   | 7.04)   | 6.99)   | 0.35)   |        | 68.50)  | 50.85)  | -0.78)  |        | 1.91)  | 1.26)  | -0.82)  |        |
|              |   |   |   |   | 0.32    | 0.32    | -0.03   |        | 2.96    | 10.95   | 4.59    |        | 0.05   | 0.20   | 4.74    |        |
| Latvia       | — | — | — | — | (0.07,  | (0.04,  | (-0.26, | 0.823  | (1.99,  | (8.60,  | (3.47,  | <0.001 | (0.00, | (0.01, | (3.14,  | <0.001 |
|              |   |   |   |   | 0.95)   | 1.37)   | 0.21)   |        | 4.26)   | 13.88)  | 5.72)   |        | 0.53)  | 1.20)  | 6.38)   |        |
|              |   |   |   |   | 23.12   | 25.08   | 0.28    |        | 64.03   | 44.73   | -1.22   |        | 1.08   | 0.74   | -1.28   |        |
| Lebanon      | — | — | — | — | (20.27, | (23.08, | (0.21,  | <0.001 | (59.33, | (41.94, | (-1.34, | <0.001 | (0.55, | (0.42, | (-1.39, | <0.001 |
|              |   |   |   |   | 26.27)  | 27.23)  | 0.34)   |        | 69.00)  | 47.67)  | -1.11)  |        | 1.92)  | 1.23)  | -1.18)  |        |
|              |   |   |   |   | 1.80    | 1.71    | -0.17   |        | 49.03   | 80.59   | 1.72    |        | 0.88   | 1.45   | 1.72    |        |
| Lesotho      | — | — | — | — | (0.85,  | (0.96,  | (-0.23, | <0.001 | (43.36, | (74.80, | (1.31,  | <0.001 | (0.28, | (0.77, | (1.27,  | <0.001 |
|              |   |   |   |   | 3.35)   | 2.82)   | -0.11)  |        | 55.25)  | 86.72)  | 2.12)   |        | 2.13)  | 2.50)  | 2.17)   |        |
|              |   |   |   |   | 6.67    | 7.05    | 0.19    |        | 64.20   | 82.12   | 0.89    |        | 1.12   | 1.44   | 0.93    |        |
| Liberia      | — | — | — | — | (4.80,  | (5.85,  | (0.15,  | <0.001 | (58.09, | (77.97, | (0.67,  | <0.001 | (0.45, | (0.93, | (0.71,  | <0.001 |
|              |   |   |   |   | 9.06)   | 8.42)   | 0.24)   |        | 70.80)  | 86.44)  | 1.12)   |        | 2.33)  | 2.12)  | 1.15)   |        |
|              |   |   |   |   | 19.15   | 20.29   | 0.19    |        | 59.17   | 55.15   | -0.20   |        | 0.99   | 0.93   | -0.18   |        |
| Libya        | — | — | — | — | (16.83, | (18.78, | (0.12,  | <0.001 | (55.22, | (52.60, | (-0.86, | 0.559  | (0.54, | (0.62, | (-0.89, | 0.631  |
|              |   |   |   |   | 21.70)  | 21.89)  | 0.25)   |        | 63.34)  | 57.81)  | 0.47)   |        | 1.69)  | 1.33)  | 0.54)   |        |
|              |   |   |   |   | 0.90    | 0.85    | -0.19   |        | 9.49    | 18.28   | 2.36    |        | 0.17   | 0.33   | 2.41    |        |
| Lithuania    | — | — | — | — | (0.47,  | (0.36,  | (-0.29, | <0.001 | (7.95,  | (15.62, | (1.32,  | <0.001 | (0.03, | (0.07, | (1.32,  | <0.001 |
|              |   |   |   |   | 1.56)   | 1.78)   | -0.08)  |        | 11.25)  | 21.32)  | 3.40)   |        | 0.58)  | 1.08)  | 3.52)   |        |

|                  |   |   |   |   |        |        |         |        |          |          |         |        |        |        |         |        |
|------------------|---|---|---|---|--------|--------|---------|--------|----------|----------|---------|--------|--------|--------|---------|--------|
|                  |   |   |   |   | 2.68   | 1.95   | -1.10   |        | 3.90     | 2.57     | -1.40   |        | 0.06   | 0.04   | -1.37   |        |
| Luxembourg       | — | — | — | — | (0.79, | (0.61, | (-1.21, | <0.001 | (1.45,   | (0.94,   | (-1.94, | <0.001 | (0.00, | (0.00, | (-1.37, | <0.001 |
|                  |   |   |   |   | 7.44)  | 5.18)  | -1.00)  |        | 9.16)    | 6.06)    | -0.86)  |        | 3.74)  | 2.48)  | -1.37)  |        |
|                  |   |   |   |   | 8.59   | 8.71   | 0.05    |        | 317.23   | 188.49   | -1.76   |        | 5.63   | 3.35   | -1.76   |        |
| Madagascar       | — | — | — | — | (7.65, | (8.11, | (0.04,  | <0.001 | (311.54, | (185.71, | (-2.19, | <0.001 | (4.89, | (2.99, | (-2.19, | <0.001 |
|                  |   |   |   |   | 9.62)  | 9.34)  | 0.06)   |        | 323.00)  | 191.29)  | -1.33)  |        | 6.46)  | 3.75)  | -1.32)  |        |
|                  |   |   |   |   | 7.31   | 7.18   | -0.05   |        | 92.41    | 57.40    | -1.58   |        | 1.64   | 1.01   | -1.65   |        |
| Malawi           | — | — | — | — | (6.34, | (6.52, | (-0.08, | <0.001 | (88.96,  | (55.53,  | (-1.83, | <0.001 | (1.20, | (0.78, | (-1.93, | <0.001 |
|                  |   |   |   |   | 8.38)  | 7.90)  | -0.03)  |        | 95.96)   | 59.31)   | -1.34)  |        | 2.18)  | 1.30)  | -1.36)  |        |
|                  |   |   |   |   | 3.17   | 3.27   | 0.10    |        | 13.53    | 8.68     | -1.53   |        | 0.24   | 0.15   | -1.59   |        |
| Malaysia         | — | — | — | — | (2.76, | (2.98, | (0.03,  | 0.007  | (12.67,  | (8.20,   | (-2.14, | <0.001 | (0.14, | (0.09, | (-2.30, | <0.001 |
|                  |   |   |   |   | 3.62)  | 3.59)  | 0.17)   |        | 14.43)   | 9.18)    | -0.92)  |        | 0.38)  | 0.23)  | -0.87)  |        |
|                  |   |   |   |   | 3.89   | 4.15   | 0.21    |        | 21.42    | 7.13     | -3.65   |        | 0.38   | 0.12   | -3.65   |        |
| Maldives         | — | — | — | — | (0.55, | (2.20, | (0.18,  | <0.001 | (11.37,  | (4.36,   | (-4.12, | <0.001 | (0.00, | (0.00, | (-4.13, | <0.001 |
|                  |   |   |   |   | 13.97) | 7.91)  | 0.25)   |        | 37.32)   | 11.63)   | -3.18)  |        | 8.20)  | 2.84)  | -3.17)  |        |
|                  |   |   |   |   | 6.14   | 6.41   | 0.15    |        | 101.89   | 99.93    | -0.07   |        | 1.80   | 1.76   | -0.09   |        |
| Mali             | — | — | — | — | (5.20, | (5.79, | (0.13,  | <0.001 | (98.03,  | (97.51,  | (-0.36, | 0.655  | (1.32, | (1.45, | (-0.41, | 0.596  |
|                  |   |   |   |   | 7.20)  | 7.08)  | 0.17)   |        | 105.88)  | 102.40)  | 0.23)   |        | 2.41)  | 2.12)  | 0.24)   |        |
|                  |   |   |   |   | 3.79   | 2.66   | -1.25   |        | 5.02     | 5.40     | 0.21    |        | 0.08   | 0.09   | 0.33    |        |
| Malta            | — | — | — | — | (1.35, | (0.76, | (-1.38, | <0.001 | (2.06,   | (2.34,   | (-0.00, | 0.054  | (0.00, | (0.00, | (-0.05, | 0.088  |
|                  |   |   |   |   | 8.80)  | 7.66)  | -1.11)  |        | 10.54)   | 11.39)   | 0.43)   |        | 3.32)  | 4.07)  | 0.71)   |        |
|                  |   |   |   |   | 7.50   | 7.69   | 0.09    |        | 119.47   | 154.56   | 0.95    |        | 2.13   | 2.79   | 1.00    |        |
| Marshall Islands | — | — | — | — | (0.24, | (0.80, | (0.06,  | <0.001 | (70.22,  | (108.65, | (0.82,  | <0.001 | (0.00, | (0.01, | (0.85,  | <0.001 |
|                  |   |   |   |   | 40.96) | 29.65) | 0.11)   |        | 190.87)  | 213.55)  | 1.08)   |        | 31.40) | 21.42) | 1.16)   |        |
|                  |   |   |   |   | 7.76   | 8.10   | 0.15    |        | 63.27    | 49.03    | -0.85   |        | 1.11   | 0.86   | -0.84   |        |
| Mauritania       | — | — | — | — | (5.75, | (6.63, | (0.13,  | <0.001 | (57.36,  | (45.39,  | (-1.06, | <0.001 | (0.46, | (0.44, | (-1.05, | <0.001 |
|                  |   |   |   |   | 10.26) | 9.81)  | 0.17)   |        | 69.64)   | 52.90)   | -0.63)  |        | 2.28)  | 1.52)  | -0.62)  |        |
|                  |   |   |   |   | 10.70  | 10.22  | -0.16   |        | 60.36    | 57.49    | -0.07   |        | 1.06   | 1.01   | -0.09   |        |
| Mauritius        | — | — | — | — | (8.00, | (7.60, | (-0.18, | <0.001 | (53.68,  | (50.97,  | (-0.31, | 0.543  | (0.35, | (0.33, | (-0.32, | 0.483  |
|                  |   |   |   |   | 14.03) | 13.49) | -0.13)  |        | 67.66)   | 64.64)   | 0.16)   |        | 2.46)  | 2.43)  | 0.15)   |        |
|                  |   |   |   |   | 1.45   | 1.67   | 0.50    |        | 11.64    | 8.64     | -1.01   |        | 0.20   | 0.15   | -0.97   |        |
| Mexico           | — | — | — | — | (1.31, | (1.56, | (0.32,  | <0.001 | (11.26,  | (8.38,   | (-1.43, | <0.001 | (0.15, | (0.12, | (-1.16, | <0.001 |
|                  |   |   |   |   | 1.59)  | 1.79)  | 0.68)   |        | 12.03)   | 8.90)    | -0.59)  |        | 0.26)  | 0.19)  | -0.79)  |        |

|                   |   |   |   |   |         |         |         |        |          |          |         |        |         |        |         |        |
|-------------------|---|---|---|---|---------|---------|---------|--------|----------|----------|---------|--------|---------|--------|---------|--------|
| Micronesia        |   |   |   |   | 7.73    | 7.84    | 0.05    |        | 157.60   | 144.65   | -0.30   |        | 2.86    | 2.59   | -0.34   |        |
| (Federated States | — | — | — | — | (1.36,  | (1.53,  | (0.03,  | <0.001 | (118.28, | (108.56, | (-0.38, | <0.001 | (0.06,  | (0.06, | (-0.42, | <0.001 |
| of)               |   |   |   |   | 24.61)  | 23.76)  | 0.06)   |        | 206.07)  | 189.14)  | -0.22)  |        | 16.82)  | 15.37) | -0.27)  |        |
|                   |   |   |   |   | 2.15    | 1.53    | -1.18   |        | 4.18     | 4.54     | 0.30    |        | 0.07    | 0.08   | 0.70    |        |
| Monaco            | — | — | — | — | (0.00,  | (0.00,  | (-1.26, | <0.001 | (0.00,   | (0.00,   | (0.21,  | <0.001 | (0.00,  | (0.00, | (-0.58, | 0.284  |
|                   |   |   |   |   | 64.47)  | 47.07)  | -1.09)  |        | 67.53)   | 52.41)   | 0.39)   |        | 61.50)  | 44.45) | 2.00)   |        |
|                   |   |   |   |   | 1.62    | 1.67    | 0.11    |        | 31.52    | 17.11    | -2.06   |        | 0.57    | 0.31   | -2.06   |        |
| Mongolia          | — | — | — | — | (0.80,  | (1.09,  | (0.02,  | 0.017  | (27.40,  | (15.10,  | (-2.40, | <0.001 | (0.15,  | (0.10, | (-2.47, | <0.001 |
|                   |   |   |   |   | 2.97)   | 2.52)   | 0.20)   |        | 36.11)   | 19.37)   | -1.71)  |        | 1.55)   | 0.82)  | -1.65)  |        |
|                   |   |   |   |   | 0.90    | 0.73    | -0.72   |        | 4.70     | 3.26     | -1.49   |        | 0.08    | 0.06   | -1.62   |        |
| Montenegro        | — | — | — | — | (0.13,  | (0.07,  | (-0.80, | <0.001 | (2.43,   | (1.35,   | (-2.86, | 0.036  | (0.00,  | (0.00, | (-2.96, | 0.020  |
|                   |   |   |   |   | 3.07)   | 3.18)   | -0.64)  |        | 8.26)    | 6.77)    | -0.10)  |        | 1.69)   | 2.09)  | -0.25)  |        |
|                   |   |   |   |   | 17.49   | 18.20   | 0.13    |        | 66.26    | 39.66    | -1.78   |        | 1.14    | 0.67   | -1.77   |        |
| Morocco           | — | — | — | — | (16.63, | (17.52, | (0.11,  | <0.001 | (64.61,  | (38.65,  | (-2.11, | <0.001 | (0.93,  | (0.54, | (-2.09, | <0.001 |
|                   |   |   |   |   | 18.39)  | 18.89)  | 0.15)   |        | 67.95)   | 40.69)   | -1.45)  |        | 1.38)   | 0.81)  | -1.46)  |        |
|                   |   |   |   |   | 5.71    | 6.23    | 0.30    |        | 81.04    | 72.24    | -0.39   |        | 1.45    | 1.29   | -0.41   |        |
| Mozambique        | — | — | — | — | (4.99,  | (5.72,  | (0.27,  | <0.001 | (78.26,  | (70.48,  | (-0.55, | <0.001 | (1.10,  | (1.06, | (-0.54, | <0.001 |
|                   |   |   |   |   | 6.52)   | 6.79)   | 0.33)   |        | 83.89)   | 74.03)   | -0.24)  |        | 1.88)   | 1.55)  | -0.28)  |        |
|                   |   |   |   |   | 7.50    | 7.66    | 0.07    |        | 96.19    | 46.19    | -2.53   |        | 1.70    | 0.81   | -2.56   |        |
| Myanmar           | — | — | — | — | (7.06,  | (7.30,  | (0.05,  | <0.001 | (94.64,  | (45.29,  | (-2.65, | <0.001 | (1.49,  | (0.69, | (-2.68, | <0.001 |
|                   |   |   |   |   | 7.96)   | 8.04)   | 0.09)   |        | 97.77)   | 47.09)   | -2.40)  |        | 1.92)   | 0.93)  | -2.43)  |        |
|                   |   |   |   |   | 2.32    | 2.31    | -0.02   |        | 55.22    | 41.51    | -0.89   |        | 1.00    | 0.75   | -0.89   |        |
| Namibia           | — | — | — | — | (1.11,  | (1.43,  | (-0.07, | 0.437  | (48.42,  | (37.46,  | (-1.27, | <0.001 | (0.29,  | (0.30, | (-1.30, | <0.001 |
|                   |   |   |   |   | 4.34)   | 3.53)   | 0.03)   |        | 62.73)   | 45.90)   | -0.51)  |        | 2.54)   | 1.56)  | -0.48)  |        |
|                   |   |   |   |   | 7.30    | 7.37    | 0.03    |        | 142.93   | 143.89   | 0.02    |        | 2.57    | 2.58   | 0.00    |        |
| Nauru             | — | — | — | — | (0.00,  | (0.00,  | (0.01,  | 0.004  | (48.64,  | (52.93,  | (-0.10, | 0.802  | (0.00,  | (0.00, | (-0.12, | 0.990  |
|                   |   |   |   |   | 118.06) | 107.58) | 0.05)   |        | 327.58)  | 315.32)  | 0.13)   |        | 108.85) | 98.30) | 0.12)   |        |
|                   |   |   |   |   | 1.10    | 1.15    | 0.14    |        | 23.72    | 13.30    | -1.98   |        | 0.43    | 0.24   | -2.01   |        |
| Nepal             | — | — | — | — | (0.86,  | (0.96,  | (0.04,  | 0.009  | (22.53,  | (12.64,  | (-2.10, | <0.001 | (0.28,  | (0.16, | (-2.25, | <0.001 |
|                   |   |   |   |   | 1.40)   | 1.37)   | 0.24)   |        | 24.95)   | 13.98)   | -1.87)  |        | 0.62)   | 0.35)  | -1.78)  |        |
|                   |   |   |   |   | 1.29    | 0.99    | -0.91   |        | 1.97     | 1.51     | -0.95   |        | 0.03    | 0.02   | -1.53   |        |
| Netherlands       | — | — | — | — | (1.02,  | (0.74,  | (-0.99, | <0.001 | (1.63,   | (1.20,   | (-1.10, | <0.001 | (0.00,  | (0.00, | (-2.27, | <0.001 |
|                   |   |   |   |   | 1.61)   | 1.29)   | -0.84)  |        | 2.35)    | 1.87)    | -0.80)  |        | 0.13)   | 0.12)  | -0.79)  |        |

|                          |   |   |   |   |         |         |         |        |         |         |         |        |         |         |         |        |
|--------------------------|---|---|---|---|---------|---------|---------|--------|---------|---------|---------|--------|---------|---------|---------|--------|
|                          |   |   |   |   | 2.10    | 1.53    | -1.09   |        | 5.54    | 2.94    | -2.26   |        | 0.10    | 0.05    | -2.40   |        |
| New Zealand              | — | — | — | — | (1.41,  | (0.96,  | (-1.19, | <0.001 | (4.37,  | (2.13,  | (-2.67, | <0.001 | (0.01,  | (0.00,  | (-3.70, | <0.001 |
|                          |   |   |   |   | 3.01)   | 2.31)   | -0.99)  |        | 6.93)   | 3.97)   | -1.84)  |        | 0.45)   | 0.37)   | -1.08)  |        |
|                          |   |   |   |   | 1.63    | 3.28    | 2.44    |        | 19.14   | 10.70   | -2.07   |        | 0.34    | 0.18    | -2.21   |        |
| Nicaragua                | — | — | — | — | (1.01,  | (2.63,  | (2.36,  | <0.001 | (16.75, | (9.50,  | (-2.83, | <0.001 | (0.09,  | (0.06,  | (-3.18, | <0.001 |
|                          |   |   |   |   | 2.53)   | 4.04)   | 2.52)   |        | 21.80)  | 12.01)  | -1.31)  |        | 0.89)   | 0.43)   | -1.23)  |        |
|                          |   |   |   |   | 6.18    | 6.61    | 0.23    |        | 57.32   | 60.29   | 0.19    |        | 1.01    | 1.06    | 0.19    |        |
| Niger                    | — | — | — | — | (5.18,  | (5.97,  | (0.21,  | <0.001 | (54.26, | (58.38, | (0.00,  | 0.049  | (0.64,  | (0.82,  | (-0.05, | 0.115  |
|                          |   |   |   |   | 7.33)   | 7.31)   | 0.25)   |        | 60.52)  | 62.25)  | 0.39)   |        | 1.53)   | 1.35)   | 0.43)   |        |
|                          |   |   |   |   | 9.69    | 9.87    | 0.07    |        | 59.44   | 50.75   | -0.55   |        | 1.04    | 0.88    | -0.57   |        |
| Nigeria                  | — | — | — | — | (9.33,  | (9.63,  | (0.02,  | 0.006  | (58.56, | (50.22, | (-0.73, | <0.001 | (0.93,  | (0.82,  | (-0.72, | <0.001 |
|                          |   |   |   |   | 10.07)  | 10.11)  | 0.12)   |        | 60.34)  | 51.28)  | -0.36)  |        | 1.17)   | 0.96)   | -0.42)  |        |
|                          |   |   |   |   | 10.05   | 10.31   | 0.09    |        | 87.39   | 64.29   | -1.05   |        | 1.56    | 1.13    | -1.11   |        |
| Niue                     | — | — | — | — | (0.00,  | (0.00,  | (0.07,  | <0.001 | (0.36,  | (0.00,  | (-1.25, | <0.001 | (0.00,  | (0.00,  | (-1.33, | <0.001 |
|                          |   |   |   |   | 538.43) | 752.35) | 0.11)   |        | 685.14) | 854.01) | -0.84)  |        | 520.98) | 734.34) | -0.88)  |        |
|                          |   |   |   |   | 2.78    | 2.37    | -0.54   |        | 15.65   | 10.32   | -1.38   |        | 0.27    | 0.18    | -1.39   |        |
| North Macedonia          | — | — | — | — | (1.76,  | (1.47,  | (-0.61, | <0.001 | (13.07, | (8.27,  | (-1.78, | <0.001 | (0.04,  | (0.01,  | (-1.90, | <0.001 |
|                          |   |   |   |   | 4.18)   | 3.71)   | -0.47)  |        | 18.61)  | 12.81)  | -0.97)  |        | 0.94)   | 0.93)   | -0.88)  |        |
|                          |   |   |   |   | 5.00    | 5.07    | -0.03   |        | 30.60   | 17.50   | -2.15   |        | 0.55    | 0.31    | -2.22   |        |
| Northern Mariana Islands | — | — | — | — | (0.23,  | (0.00,  | (-0.28, | 0.815  | (12.82, | (1.65,  | (-2.76, | <0.001 | (0.00,  | (0.00,  | (-2.86, | <0.001 |
|                          |   |   |   |   | 28.00)  | 52.76)  | 0.23)   |        | 64.00)  | 73.06)  | -1.54)  |        | 20.86)  | 44.08)  | -1.58)  |        |
|                          |   |   |   |   | 1.72    | 1.94    | 0.41    |        | 2.99    | 1.28    | -2.87   |        | 0.05    | 0.02    | -3.22   |        |
| Norway                   | — | — | — | — | (1.15,  | (1.37,  | (0.31,  | <0.001 | (2.21,  | (0.82,  | (-3.08, | <0.001 | (0.00,  | (0.00,  | (-5.21, | 0.002  |
|                          |   |   |   |   | 2.49)   | 2.70)   | 0.51)   |        | 3.96)   | 1.93)   | -2.66)  |        | 0.35)   | 0.29)   | -1.19)  |        |
|                          |   |   |   |   | 11.81   | 14.48   | 0.71    |        | 38.07   | 25.04   | -1.42   |        | 0.65    | 0.41    | -1.56   |        |
| Oman                     | — | — | — | — | (9.57,  | (13.16, | (0.59,  | <0.001 | (33.92, | (23.09, | (-1.94, | <0.001 | (0.22,  | (0.20,  | (-2.10, | <0.001 |
|                          |   |   |   |   | 14.44)  | 15.94)  | 0.83)   |        | 42.61)  | 27.16)  | -0.89)  |        | 1.51)   | 0.84)   | -1.03)  |        |
|                          |   |   |   |   | 1.80    | 1.85    | 0.10    |        | 34.07   | 40.76   | 0.63    |        | 0.61    | 0.73    | 0.65    |        |
| Pakistan                 | — | — | — | — | (1.66,  | (1.76,  | (0.06,  | <0.001 | (33.44, | (40.31, | (0.51,  | <0.001 | (0.53,  | (0.67,  | (0.51,  | <0.001 |
|                          |   |   |   |   | 1.95)   | 1.95)   | 0.15)   |        | 34.71)  | 41.21)  | 0.74)   |        | 0.70)   | 0.79)   | 0.79)   |        |
|                          |   |   |   |   | 2.20    | 2.08    | -0.22   |        | 13.30   | 11.01   | -0.66   |        | 0.24    | 0.19    | -0.65   |        |
| Palau                    | — | — | — | — | (0.00,  | (0.00,  | (-0.26, | <0.001 | (0.22,  | (0.10,  | (-0.88, | <0.001 | (0.00,  | (0.00,  | (-1.06, | 0.002  |
|                          |   |   |   |   | 63.28)  | 72.44)  | -0.17)  |        | 83.53)  | 87.50)  | -0.43)  |        | 59.37)  | 69.18)  | -0.23)  |        |



|                   |   |   |   |   |         |         |         |        |         |         |         |        |        |        |         |        |
|-------------------|---|---|---|---|---------|---------|---------|--------|---------|---------|---------|--------|--------|--------|---------|--------|
|                   |   |   |   |   | 14.51   | 14.96   | 0.10    |        | 22.73   | 17.74   | -0.89   |        | 0.38   | 0.29   | -0.97   |        |
| Palestine         | — | — | — | — | (11.49, | (13.19, | (0.05,  | <0.001 | (19.05, | (15.86, | (-1.20, | <0.001 | (0.05, | (0.10, | (-1.29, | <0.001 |
|                   |   |   |   |   | 18.11)  | 16.90)  | 0.14)   |        | 26.96)  | 19.80)  | -0.58)  |        | 1.39)  | 0.68)  | -0.64)  |        |
|                   |   |   |   |   | 1.45    | 2.27    | 1.57    |        | 10.51   | 13.64   | 0.96    |        | 0.18   | 0.23   | 0.92    |        |
| Panama            | — | — | — | — | (0.78,  | (1.58,  | (1.51,  | <0.001 | (8.52,  | (11.88, | (0.30,  | 0.004  | (0.02, | (0.06, | (0.20,  | 0.012  |
|                   |   |   |   |   | 2.49)   | 3.14)   | 1.63)   |        | 12.85)  | 15.59)  | 1.63)   |        | 0.77)  | 0.62)  | 1.65)   |        |
|                   |   |   |   |   | 6.70    | 6.77    | 0.03    |        | 74.69   | 79.83   | 0.19    |        | 1.34   | 1.43   | 0.17    |        |
| Papua New Guinea  | — | — | — | — | (5.39,  | (5.96,  | (0.02,  | <0.001 | (70.19, | (77.00, | (0.02,  | 0.030  | (0.80, | (1.07, | (-0.02, | 0.072  |
|                   |   |   |   |   | 8.23)   | 7.66)   | 0.05)   |        | 79.40)  | 82.74)  | 0.37)   |        | 2.13)  | 1.87)  | 0.35)   |        |
|                   |   |   |   |   | 1.59    | 2.74    | 1.89    |        | 20.53   | 18.41   | -0.31   |        | 0.36   | 0.32   | -0.32   |        |
| Paraguay          | — | — | — | — | (1.01,  | (2.17,  | (1.81,  | <0.001 | (18.23, | (16.88, | (-0.72, | 0.136  | (0.12, | (0.15, | (-0.72, | 0.112  |
|                   |   |   |   |   | 2.39)   | 3.42)   | 1.97)   |        | 23.04)  | 20.04)  | 0.10)   |        | 0.85)  | 0.61)  | 0.08)   |        |
|                   |   |   |   |   | 1.46    | 3.07    | 2.61    |        | 26.80   | 12.14   | -2.59   |        | 0.46   | 0.20   | -2.72   |        |
| Peru              | — | — | — | — | (1.21,  | (2.78,  | (2.53,  | <0.001 | (25.68, | (11.56, | (-3.49, | <0.001 | (0.32, | (0.13, | (-3.66, | <0.001 |
|                   |   |   |   |   | 1.74)   | 3.37)   | 2.70)   |        | 27.95)  | 12.74)  | -1.69)  |        | 0.63)  | 0.29)  | -1.77)  |        |
|                   |   |   |   |   | 10.04   | 10.50   | 0.16    |        | 25.53   | 80.45   | 4.12    |        | 0.45   | 1.43   | 4.17    |        |
| Philippines       | — | — | — | — | (9.62,  | (10.20, | (0.14,  | <0.001 | (24.86, | (79.61, | (3.41,  | <0.001 | (0.36, | (1.32, | (3.38,  | <0.001 |
|                   |   |   |   |   | 10.47)  | 10.81)  | 0.18)   |        | 26.20)  | 81.30)  | 4.83)   |        | 0.54)  | 1.55)  | 4.97)   |        |
|                   |   |   |   |   | 3.22    | 3.21    | -0.00   |        | 12.55   | 8.55    | -1.38   |        | 0.22   | 0.15   | -1.49   |        |
| Poland            | — | — | — | — | (2.95,  | (2.94,  | (-0.05, | 0.933  | (12.01, | (8.09,  | (-1.78, | <0.001 | (0.16, | (0.10, | (-1.71, | <0.001 |
|                   |   |   |   |   | 3.51)   | 3.51)   | 0.04)   |        | 13.10)  | 9.03)   | -0.98)  |        | 0.31)  | 0.23)  | -1.26)  |        |
|                   |   |   |   |   | 1.51    | 1.09    | -1.12   |        | 3.29    | 1.71    | -2.29   |        | 0.05   | 0.03   | -2.06   |        |
| Portugal          | — | — | — | — | (1.14,  | (0.76,  | (-1.19, | <0.001 | (2.74,  | (1.29,  | (-2.76, | <0.001 | (0.01, | (0.00, | (-3.17, | <0.001 |
|                   |   |   |   |   | 1.96)   | 1.52)   | -1.05)  |        | 3.92)   | 2.23)   | -1.82)  |        | 0.20)  | 0.19)  | -0.95)  |        |
|                   |   |   |   |   | 9.75    | 9.63    | -0.03   |        | 38.39   | 41.09   | 0.23    |        | 0.67   | 0.72   | 0.20    |        |
| Puerto Rico       | — | — | — | — | (8.16,  | (7.93,  | (-0.06, | 0.011  | (35.17, | (37.50, | (-0.58, | 0.579  | (0.31, | (0.32, | (-0.79, | 0.689  |
|                   |   |   |   |   | 11.55)  | 11.58)  | -0.01)  |        | 41.82)  | 44.94)  | 1.04)   |        | 1.27)  | 1.42)  | 1.21)   |        |
|                   |   |   |   |   | 10.67   | 7.80    | -1.12   |        | 13.82   | 5.48    | -3.00   |        | 0.22   | 0.08   | -3.30   |        |
| Qatar             | — | — | — | — | (7.27,  | (6.66,  | (-1.18, | <0.001 | (9.55,  | (4.38,  | (-3.96, | <0.001 | (0.00, | (0.00, | (-4.56, | <0.001 |
|                   |   |   |   |   | 15.81)  | 9.30)   | -1.06)  |        | 19.90)  | 6.98)   | -2.03)  |        | 3.17)  | 0.84)  | -2.01)  |        |
|                   |   |   |   |   | 10.75   | 9.62    | -0.39   |        | 51.66   | 5.21    | -7.64   |        | 0.85   | 0.07   | -8.49   |        |
| Republic of Korea | — | — | — | — | (10.30, | (9.20,  | (-0.44, | <0.001 | (50.68, | (4.88,  | (-8.10, | <0.001 | (0.73, | (0.04, | (-8.92, | <0.001 |
|                   |   |   |   |   | 11.22)  | 10.07)  | -0.34)  |        | 52.65)  | 5.55)   | -7.18)  |        | 0.99)  | 0.13)  | -8.05)  |        |

|                                     |   |   |   |   |        |        |         |        |          |         |         |        |        |        |         |        |
|-------------------------------------|---|---|---|---|--------|--------|---------|--------|----------|---------|---------|--------|--------|--------|---------|--------|
| Republic of<br>Moldova              | — | — | — | — | 1.07   | 1.11   | 0.12    |        | 6.06     | 15.58   | 3.19    |        | 0.11   | 0.28   | 3.21    |        |
|                                     |   |   |   |   | (0.66, | (0.65, | (0.04,  | 0.003  | (5.00,   | (13.64, | (2.28,  | <0.001 | (0.01, | (0.08, | (1.97,  | <0.001 |
|                                     |   |   |   |   | 1.67)  | 1.84)  | 0.20)   |        | 7.30)    | 17.78)  | 4.10)   |        | 0.43)  | 0.80)  | 4.46)   |        |
| Romania                             | — | — | — | — | 2.91   | 2.81   | -0.14   |        | 20.39    | 16.48   | -0.72   |        | 0.36   | 0.29   | -0.74   |        |
|                                     |   |   |   |   | (2.57, | (2.42, | (-0.21, | <0.001 | (19.46,  | (15.50, | (-1.88, | 0.223  | (0.25, | (0.18, | (-1.84, | 0.191  |
|                                     |   |   |   |   | 3.29)  | 3.25)  | -0.06)  |        | 21.36)   | 17.52)  | 0.44)   |        | 0.52)  | 0.47)  | 0.37)   |        |
| Russian Federation                  | — | — | — | — | 0.53   | 0.54   | 0.08    |        | 12.47    | 15.09   | 0.81    |        | 0.23   | 0.27   | 0.80    |        |
|                                     |   |   |   |   | (0.47, | (0.48, | (-0.04, | 0.181  | (12.20,  | (14.77, | (-0.34, | 0.169  | (0.19, | (0.23, | (-0.61, | 0.269  |
|                                     |   |   |   |   | 0.59)  | 0.60)  | 0.20)   |        | 12.75)   | 15.41)  | 1.99)   |        | 0.27)  | 0.32)  | 2.23)   |        |
| Rwanda                              | — | — | — | — | 7.23   | 7.86   | 0.30    |        | 167.51   | 52.35   | -3.93   |        | 2.99   | 0.92   | -4.00   |        |
|                                     |   |   |   |   | (6.17, | (7.09, | (0.27,  | <0.001 | (162.30, | (50.34, | (-4.27, | <0.001 | (2.33, | (0.67, | (-4.34, | <0.001 |
|                                     |   |   |   |   | 8.43)  | 8.70)  | 0.34)   |        | 172.86)  | 54.42)  | -3.59)  |        | 3.79)  | 1.24)  | -3.66)  |        |
| Saint Kitts and<br>Nevis            | — | — | — | — | 5.57   | 5.55   | -0.01   |        | 65.81    | 25.55   | -3.08   |        | 1.19   | 0.45   | -3.17   |        |
|                                     |   |   |   |   | (0.08, | (0.32, | (-0.03, | 0.238  | (31.87,  | (9.50,  | (-4.29, | <0.001 | (0.00, | (0.00, | (-4.42, | <0.001 |
|                                     |   |   |   |   | 35.91) | 27.59) | 0.01)   |        | 121.13)  | 56.66)  | -1.86)  |        | 28.02) | 19.04) | -1.90)  |        |
| Saint Lucia                         | — | — | — | — | 6.58   | 6.56   | -0.02   |        | 53.73    | 38.97   | -1.10   |        | 0.96   | 0.69   | -1.11   |        |
|                                     |   |   |   |   | (1.31, | (2.01, | (-0.03, | 0.012  | (34.38,  | (25.76, | (-1.48, | <0.001 | (0.00, | (0.00, | (-1.53, | <0.001 |
|                                     |   |   |   |   | 20.17) | 16.21) | -0.00)  |        | 80.44)   | 56.85)  | -0.71)  |        | 11.17) | 7.26)  | -0.68)  |        |
| Saint Vincent and<br>the Grenadines | — | — | — | — | 9.43   | 9.19   | -0.08   |        | 81.22    | 75.59   | -0.17   |        | 1.44   | 1.34   | -0.06   |        |
|                                     |   |   |   |   | (2.21, | (2.44, | (-0.10, | <0.001 | (54.75,  | (51.67, | (-0.89, | 0.635  | (0.00, | (0.00, | (-0.72, | 0.863  |
|                                     |   |   |   |   | 26.92) | 24.11) | -0.06)  |        | 116.72)  | 106.94) | 0.55)   |        | 14.41) | 11.73) | 0.61)   |        |
| Samoa                               | — | — | — | — | 10.25  | 10.23  | -0.01   |        | 85.88    | 88.97   | 0.13    |        | 1.54   | 1.59   | 0.10    |        |
|                                     |   |   |   |   | (3.31, | (4.14, | (-0.04, | 0.325  | (61.95,  | (68.27, | (0.02,  | 0.017  | (0.01, | (0.05, | (-0.01, | 0.063  |
|                                     |   |   |   |   | 24.44) | 21.18) | 0.01)   |        | 116.34)  | 114.11) | 0.23)   |        | 11.27) | 8.56)  | 0.20)   |        |
| San Marino                          | — | — | — | — | 3.04   | 2.20   | -1.12   |        | 2.81     | 3.52    | 0.77    |        | 0.04   | 0.06   | 1.39    |        |
|                                     |   |   |   |   | (0.00, | (0.00, | (-1.17, | <0.001 | (0.00,   | (0.00,  | (0.65,  | <0.001 | (0.00, | (0.00, | (1.39,  | <0.001 |
|                                     |   |   |   |   | 49.80) | 43.38) | -1.06)  |        | 49.35)   | 45.78)  | 0.90)   |        | 43.88) | 39.44) | 1.39)   |        |
| Sao Tome and<br>Principe            | — | — | — | — | 8.19   | 8.63   | 0.18    |        | 34.02    | 31.91   | -0.01   |        | 0.60   | 0.55   | -0.06   |        |
|                                     |   |   |   |   | (1.35, | (3.38, | (0.15,  | <0.001 | (16.78,  | (20.75, | (-0.76, | 0.990  | (0.00, | (0.00, | (-0.81, | 0.884  |
|                                     |   |   |   |   | 27.29) | 18.16) | 0.21)   |        | 62.28)   | 47.06)  | 0.76)   |        | 14.82) | 6.00)  | 0.70)   |        |
| Saudi Arabia                        | — | — | — | — | 5.74   | 6.37   | 0.36    |        | 18.43    | 15.97   | -0.49   |        | 0.32   | 0.27   | -0.50   |        |
|                                     |   |   |   |   | (5.14, | (6.04, | (0.34,  | <0.001 | (17.36,  | (15.44, | (-0.79, | 0.001  | (0.19, | (0.21, | (-0.75, | <0.001 |
|                                     |   |   |   |   | 6.39)  | 6.71)  | 0.38)   |        | 19.56)   | 16.53)  | -0.19)  |        | 0.50)  | 0.36)  | -0.24)  |        |

|                 |   |   |   |   |        |        |         |        |          |          |         |        |        |        |         |        |
|-----------------|---|---|---|---|--------|--------|---------|--------|----------|----------|---------|--------|--------|--------|---------|--------|
|                 |   |   |   |   | 8.36   | 8.35   | -0.01   |        | 49.68    | 60.53    | 0.75    | 0.87   | 1.06   | 0.75   |         |        |
| Senegal         | — | — | — | — | (7.18, | (7.57, | (-0.07, | 0.775  | (46.82,  | (58.44,  | (-0.34, | 0.178  | (0.52, | (0.79, | (-0.38, | 0.195  |
|                 |   |   |   |   | 9.69)  | 9.20)  | 0.05)   |        | 52.69)   | 62.68)   | 1.85)   |        | 1.36)  | 1.38)  | 1.90)   |        |
|                 |   |   |   |   | 1.89   | 1.33   | -1.20   |        | 9.95     | 5.18     | -2.23   |        | 0.17   | 0.09   | -2.19   |        |
| Serbia          | — | — | — | — | (1.47, | (0.96, | (-1.28, | <0.001 | (8.95,   | (4.41,   | (-2.76, | <0.001 | (0.07, | (0.02, | (-2.74, | <0.001 |
|                 |   |   |   |   | 2.39)  | 1.81)  | -1.11)  |        | 11.03)   | 6.05)    | -1.71)  |        | 0.38)  | 0.30)  | -1.63)  |        |
|                 |   |   |   |   | 12.82  | 12.80  | -0.00   |        | 142.35   | 84.68    | -1.81   |        | 2.53   | 1.48   | -1.88   |        |
| Seychelles      | — | — | — | — | (2.99, | (4.44, | (-0.03, | 0.936  | (100.85, | (59.10,  | (-2.40, | <0.001 | (0.01, | (0.01, | (-2.50, | <0.001 |
|                 |   |   |   |   | 36.71) | 30.47) | 0.03)   |        | 196.11)  | 118.64)  | -1.21)  |        | 20.69) | 14.09) | -1.25)  |        |
|                 |   |   |   |   | 6.94   | 6.98   | 0.02    |        | 48.06    | 78.47    | 1.74    |        | 0.84   | 1.37   | 1.76    |        |
| Sierra Leone    | — | — | — | — | (5.51, | (6.04, | (0.01,  | 0.003  | (44.25,  | (75.33,  | (1.54,  | <0.001 | (0.40, | (0.98, | (1.54,  | <0.001 |
|                 |   |   |   |   | 8.63)  | 8.03)  | 0.03)   |        | 52.12)   | 81.71)   | 1.93)   |        | 1.55)  | 1.87)  | 1.99)   |        |
|                 |   |   |   |   | 11.11  | 8.65   | -0.85   |        | 18.88    | 16.17    | -0.54   |        | 0.32   | 0.28   | -0.50   |        |
| Singapore       | — | — | — | — | (9.51, | (7.60, | (-0.94, | <0.001 | (16.77,  | (14.70,  | (-1.38, | 0.218  | (0.10, | (0.12, | (-1.73, | 0.424  |
|                 |   |   |   |   | 12.92) | 9.86)  | -0.77)  |        | 21.19)   | 17.81)   | 0.32)   |        | 0.79)  | 0.67)  | 0.74)   |        |
|                 |   |   |   |   | 3.06   | 2.51   | -0.64   |        | 11.73    | 12.29    | 0.22    |        | 0.21   | 0.22   | 0.03    |        |
| Slovakia        | — | — | — | — | (2.38, | (1.89, | (-0.74, | <0.001 | (10.35,  | (10.84,  | (-0.62, | 0.609  | (0.06, | (0.07, | (-0.52, | 0.925  |
|                 |   |   |   |   | 3.89)  | 3.32)  | -0.55)  |        | 13.26)   | 13.93)   | 1.06)   |        | 0.52)  | 0.61)  | 0.58)   |        |
|                 |   |   |   |   | 2.89   | 2.00   | -1.27   |        | 7.04     | 3.88     | -2.10   |        | 0.12   | 0.07   | -1.54   |        |
| Slovenia        | — | — | — | — | (1.86, | (1.11, | (-1.34, | <0.001 | (5.36,   | (2.56,   | (-2.71, | <0.001 | (0.00, | (0.00, | (-2.82, | 0.021  |
|                 |   |   |   |   | 4.33)  | 3.50)  | -1.21)  |        | 9.12)    | 5.79)    | -1.49)  |        | 0.77)  | 0.97)  | -0.23)  |        |
|                 |   |   |   |   | 4.93   | 5.04   | 0.07    |        | 142.46   | 145.14   | 0.06    |        | 2.59   | 2.64   | 0.06    |        |
| Solomon Islands | — | — | — | — | (1.52, | (2.59, | (0.05,  | <0.001 | (119.51, | (130.14, | (-0.01, | 0.104  | (0.42, | (0.98, | (-0.02, | 0.161  |
|                 |   |   |   |   | 12.05) | 8.88)  | 0.10)   |        | 168.66)  | 161.42)  | 0.13)   |        | 8.63)  | 5.70)  | 0.14)   |        |
|                 |   |   |   |   | 7.25   | 7.35   | 0.07    |        | 159.97   | 94.36    | -1.80   |        | 2.87   | 1.68   | -1.83   |        |
| Somalia         | — | — | — | — | (6.19, | (6.69, | (0.01,  | 0.016  | (154.84, | (91.99,  | (-1.90, | <0.001 | (2.22, | (1.37, | (-1.95, | <0.001 |
|                 |   |   |   |   | 8.45)  | 8.06)  | 0.12)   |        | 165.24)  | 96.78)   | -1.70)  |        | 3.66)  | 2.03)  | -1.70)  |        |
|                 |   |   |   |   | 3.95   | 3.60   | -0.32   |        | 128.92   | 56.19    | -2.73   |        | 2.33   | 1.01   | -2.76   |        |
| South Africa    | — | — | — | — | (3.62, | (3.37, | (-0.35, | <0.001 | (127.02, | (55.26,  | (-4.47, | 0.003  | (2.08, | (0.89, | (-4.49, | 0.002  |
|                 |   |   |   |   | 4.30)  | 3.84)  | -0.28)  |        | 130.84)  | 57.12)   | -0.96)  |        | 2.60)  | 1.14)  | -1.00)  |        |
|                 |   |   |   |   | 9.25   | 9.04   | -0.07   |        | 88.49    | 50.42    | -1.93   |        | 1.58   | 0.89   | -1.98   |        |
| South Sudan     | — | — | — | — | (7.86, | (7.94, | (-0.09, | <0.001 | (84.16,  | (47.81,  | (-2.21, | <0.001 | (1.04, | (0.57, | (-2.25, | <0.001 |
|                 |   |   |   |   | 10.83) | 10.24) | -0.05)  |        | 93.00)   | 53.13)   | -1.66)  |        | 2.30)  | 1.32)  | -1.71)  |        |

|                            |   |   |   |   |         |         |         |        |         |         |         |        |        |        |         |        |
|----------------------------|---|---|---|---|---------|---------|---------|--------|---------|---------|---------|--------|--------|--------|---------|--------|
|                            |   |   |   |   | 1.81    | 1.31    | -1.11   |        | 3.13    | 2.58    | -0.77   |        | 0.05   | 0.04   | -0.75   |        |
| Spain                      | — | — | — | — | (1.60,  | (1.14,  | (-1.17, | <0.001 | (2.85,  | (2.32,  | (-0.93, | <0.001 | (0.02, | (0.02, | (-0.75, | <0.001 |
|                            |   |   |   |   | 2.05)   | 1.51)   | -1.05)  |        | 3.43)   | 2.86)   | -0.62)  |        | 0.10)  | 0.10)  | -0.75)  |        |
|                            |   |   |   |   | 6.85    | 6.86    | 0.00    |        | 46.14   | 22.66   | -2.33   |        | 0.80   | 0.39   | -2.37   |        |
| Sri Lanka                  | — | — | — | — | (6.24,  | (6.31,  | (-0.03, | 0.937  | (44.57, | (21.65, | (-3.51, | <0.001 | (0.60, | (0.27, | (-3.50, | <0.001 |
|                            |   |   |   |   | 7.49)   | 7.44)   | 0.03)   |        | 47.75)  | 23.71)  | -1.14)  |        | 1.04)  | 0.55)  | -1.22)  |        |
|                            |   |   |   |   | 15.13   | 16.78   | 0.34    |        | 99.14   | 70.03   | -1.19   |        | 1.72   | 1.20   | -1.23   |        |
| Sudan                      | — | — | — | — | (14.18, | (16.12, | (0.19,  | <0.001 | (96.73, | (68.71, | (-1.31, | <0.001 | (1.41, | (1.04, | (-1.37, | <0.001 |
|                            |   |   |   |   | 16.14)  | 17.46)  | 0.48)   |        | 101.60) | 71.36)  | -1.07)  |        | 2.08)  | 1.39)  | -1.10)  |        |
|                            |   |   |   |   | 7.53    | 7.85    | 0.15    |        | 68.23   | 63.32   | -0.23   |        | 1.21   | 1.12   | -0.24   |        |
| Suriname                   | — | — | — | — | (3.56,  | (4.57,  | (0.13,  | <0.001 | (54.83, | (53.16, | (-1.70, | 0.764  | (0.10, | (0.18, | (-1.90, | 0.778  |
|                            |   |   |   |   | 14.14)  | 12.60)  | 0.17)   |        | 84.06)  | 74.88)  | 1.27)   |        | 5.33)  | 3.70)  | 1.45)   |        |
|                            |   |   |   |   | 3.96    | 2.19    | -2.00   |        | 2.07    | 2.10    | 0.08    |        | 0.03   | 0.03   | -0.19   |        |
| Sweden                     | — | — | — | — | (3.29,  | (1.73,  | (-2.42, | <0.001 | (1.59,  | (1.64,  | (-0.32, | 0.694  | (0.00, | (0.00, | (-0.19, | <0.001 |
|                            |   |   |   |   | 4.74)   | 2.75)   | -1.58)  |        | 2.66)   | 2.66)   | 0.48)   |        | 0.20)  | 0.20)  | -0.19)  |        |
|                            |   |   |   |   | 1.55    | 1.05    | -1.36   |        | 1.77    | 1.27    | -1.17   |        | 0.03   | 0.02   | -1.36   |        |
| Switzerland                | — | — | — | — | (1.12,  | (0.72,  | (-1.54, | <0.001 | (1.30,  | (0.90,  | (-1.42, | <0.001 | (0.00, | (0.00, | (-1.36, | <0.001 |
|                            |   |   |   |   | 2.10)   | 1.50)   | -1.17)  |        | 2.37)   | 1.78)   | -0.92)  |        | 0.24)  | 0.22)  | -1.36)  |        |
|                            |   |   |   |   | 4.92    | 5.24    | 0.21    |        | 28.40   | 13.65   | -2.40   |        | 0.48   | 0.23   | -2.46   |        |
| Syrian Arab Republic       | — | — | — | — | (4.22,  | (4.58,  | (0.19,  | <0.001 | (26.77, | (12.59, | (-2.84, | <0.001 | (0.29, | (0.11, | (-3.02, | <0.001 |
|                            |   |   |   |   | 5.71)   | 5.98)   | 0.24)   |        | 30.12)  | 14.78)  | -1.96)  |        | 0.76)  | 0.43)  | -1.89)  |        |
|                            |   |   |   |   | 5.92    | 6.97    | 0.56    |        | 14.50   | 11.02   | -0.93   |        | 0.25   | 0.19   | -0.80   |        |
| Taiwan (Province of China) | — | — | — | — | (5.44,  | (6.45,  | (0.49,  | <0.001 | (13.74, | (10.37, | (-1.53, | 0.003  | (0.16, | (0.11, | (-1.21, | <0.001 |
|                            |   |   |   |   | 6.44)   | 7.53)   | 0.63)   |        | 15.28)  | 11.72)  | -0.32)  |        | 0.38)  | 0.31)  | -0.38)  |        |
|                            |   |   |   |   | 4.62    | 4.57    | -0.04   |        | 47.29   | 43.76   | -0.24   |        | 0.87   | 0.81   | -0.17   |        |
| Tajikistan                 | — | — | — | — | (3.62,  | (3.90,  | (-0.09, | 0.201  | (43.96, | (41.64, | (-0.66, | 0.270  | (0.47, | (0.54, | (-0.62, | 0.477  |
|                            |   |   |   |   | 5.82)   | 5.32)   | 0.02)   |        | 50.80)  | 45.96)  | 0.19)   |        | 1.48)  | 1.16)  | 0.29)   |        |
|                            |   |   |   |   | 2.81    | 2.92    | 0.14    |        | 9.52    | 8.88    | -0.05   |        | 0.16   | 0.15   | -0.09   |        |
| Thailand                   | — | — | — | — | (2.60,  | (2.72,  | (0.09,  | <0.001 | (9.13,  | (8.52,  | (-1.16, | 0.930  | (0.12, | (0.11, | (-1.25, | 0.887  |
|                            |   |   |   |   | 3.04)   | 3.13)   | 0.20)   |        | 9.91)   | 9.25)   | 1.08)   |        | 0.22)  | 0.21)  | 1.09)   |        |
|                            |   |   |   |   | 6.84    | 7.26    | 0.21    |        | 33.23   | 37.47   | 0.48    |        | 0.59   | 0.66   | 0.42    |        |
| Timor-Leste                | — | — | — | — | (4.10,  | (4.82,  | (0.19,  | <0.001 | (26.81, | (31.74, | (-0.18, | 0.152  | (0.05, | (0.12, | (-0.10, | 0.115  |
|                            |   |   |   |   | 10.78)  | 10.55)  | 0.23)   |        | 40.77)  | 43.98)  | 1.13)   |        | 2.49)  | 2.15)  | 0.94)   |        |

|                         |   |   |   |   |         |         |         |        |         |          |         |        |         |         |         |        |
|-------------------------|---|---|---|---|---------|---------|---------|--------|---------|----------|---------|--------|---------|---------|---------|--------|
|                         |   |   |   |   | 6.63    | 6.62    | 0.00    |        | 62.42   | 78.05    | 0.81    |        | 1.09    | 1.37    | 0.83    |        |
| Togo                    | — | — | — | — | (5.17,  | (5.71,  | (-0.02, | 0.764  | (57.88, | (74.87,  | (0.45,  | <0.001 | (0.57,  | (0.98,  | (0.44,  | <0.001 |
|                         |   |   |   |   | 8.39)   | 7.64)   | 0.02)   |        | 67.24)  | 81.33)   | 1.18)   |        | 1.93)   | 1.87)   | 1.23)   |        |
|                         |   |   |   |   | 9.50    | 10.18   | 0.24    |        | 97.03   | 82.84    | -0.55   |        | 1.74    | 1.48    | -0.57   |        |
| Tokelau                 | — | — | — | — | (0.00,  | (0.00,  | (0.15,  | <0.001 | (0.10,  | (0.01,   | (-0.60, | <0.001 | (0.00,  | (0.00,  | (-0.62, | <0.001 |
|                         |   |   |   |   | 838.84) | 907.60) | 0.33)   |        | 996.68) | 1045.33) | -0.50)  |        | 824.17) | 890.20) | -0.52)  |        |
|                         |   |   |   |   | 6.99    | 6.99    | 0.00    |        | 21.67   | 20.55    | -0.23   |        | 0.38    | 0.36    | -0.28   |        |
| Tonga                   | — | — | — | — | (0.74,  | (1.06,  | (-0.01, | 0.983  | (7.75,  | (8.25,   | (-0.45, | 0.040  | (0.00,  | (0.00,  | (-0.59, | 0.073  |
|                         |   |   |   |   | 27.52)  | 23.39)  | 0.01)   |        | 48.78)  | 42.63)   | -0.01)  |        | 16.30)  | 12.07)  | 0.03)   |        |
|                         |   |   |   |   | 7.34    | 7.16    | -0.08   |        | 76.36   | 41.70    | -1.99   |        | 1.37    | 0.74    | -2.02   |        |
| Trinidad and<br>Tobago  | — | — | — | — | (5.10,  | (5.18,  | (-0.10, | <0.001 | (68.68, | (36.64,  | (-2.43, | <0.001 | (0.52,  | (0.22,  | (-2.49, | <0.001 |
|                         |   |   |   |   | 10.25)  | 9.76)   | -0.06)  |        | 84.69)  | 47.36)   | -1.55)  |        | 2.93)   | 1.99)   | -1.55)  |        |
|                         |   |   |   |   | 19.82   | 20.77   | 0.16    |        | 42.91   | 31.35    | -1.09   |        | 0.73    | 0.52    | -1.15   |        |
| Tunisia                 | — | — | — | — | (18.22, | (19.53, | (0.14,  | <0.001 | (40.59, | (29.79,  | (-1.26, | <0.001 | (0.45,  | (0.34,  | (-1.37, | <0.001 |
|                         |   |   |   |   | 21.53)  | 22.08)  | 0.17)   |        | 45.34)  | 32.98)   | -0.91)  |        | 1.11)   | 0.78)   | -0.92)  |        |
|                         |   |   |   |   | 12.39   | 9.96    | -0.77   |        | 19.60   | 7.17     | -3.43   |        | 0.33    | 0.11    | -3.73   |        |
| Turkey                  | — | — | — | — | (11.92, | (9.63,  | (-0.85, | <0.001 | (19.03, | (6.89,   | (-3.79, | <0.001 | (0.25,  | (0.08,  | (-4.10, | <0.001 |
|                         |   |   |   |   | 12.87)  | 10.29)  | -0.69)  |        | 20.20)  | 7.45)    | -3.06)  |        | 0.41)   | 0.15)   | -3.35)  |        |
|                         |   |   |   |   | 4.77    | 5.01    | 0.18    |        | 19.70   | 23.47    | 0.69    |        | 0.34    | 0.41    | 0.67    |        |
| Turkmenistan            | — | — | — | — | (3.65,  | (4.09,  | (0.11,  | <0.001 | (17.38, | (21.42,  | (0.14,  | 0.013  | (0.10,  | (0.18,  | (-0.05, | 0.067  |
|                         |   |   |   |   | 6.14)   | 6.08)   | 0.24)   |        | 22.26)  | 25.67)   | 1.24)   |        | 0.86)   | 0.80)   | 1.39)   |        |
|                         |   |   |   |   | 7.88    | 8.30    | 0.17    |        | 128.44  | 113.74   | -0.42   |        | 2.31    | 2.04    | -0.43   |        |
| Tuvalu                  | — | — | — | — | (0.00,  | (0.00,  | (0.14,  | <0.001 | (38.43, | (36.73,  | (-0.48, | <0.001 | (0.00,  | (0.00,  | (-0.51, | <0.001 |
|                         |   |   |   |   | 124.25) | 105.75) | 0.20)   |        | 314.85) | 268.96)  | -0.35)  |        | 113.28) | 93.73)  | -0.35)  |        |
|                         |   |   |   |   | 7.60    | 7.48    | -0.08   |        | 64.82   | 55.31    | -0.60   |        | 1.15    | 0.97    | -0.62   |        |
| Uganda                  | — | — | — | — | (6.83,  | (7.00,  | (-0.15, | 0.035  | (62.56, | (54.01,  | (-0.91, | <0.001 | (0.87,  | (0.81,  | (-1.02, | 0.003  |
|                         |   |   |   |   | 8.44)   | 7.99)   | -0.01)  |        | 67.15)  | 56.63)   | -0.29)  |        | 1.51)   | 1.17)   | -0.21)  |        |
|                         |   |   |   |   | 0.25    | 0.25    | -0.03   |        | 3.56    | 7.73     | 2.65    |        | 0.06    | 0.14    | 2.60    |        |
| Ukraine                 | — | — | — | — | (0.19,  | (0.18,  | (-0.30, | 0.839  | (3.31,  | (7.32,   | (0.19,  | 0.034  | (0.03,  | (0.09,  | (0.15,  | 0.037  |
|                         |   |   |   |   | 0.33)   | 0.34)   | 0.24)   |        | 3.83)   | 8.16)    | 5.16)   |        | 0.11)   | 0.21)   | 5.11)   |        |
|                         |   |   |   |   | 26.32   | 27.16   | 0.10    |        | 67.93   | 81.84    | 0.62    |        | 1.14    | 1.41    | 0.70    |        |
| United Arab<br>Emirates | — | — | — | — | (23.46, | (25.79, | (0.08,  | <0.001 | (62.89, | (79.13,  | (0.33,  | <0.001 | (0.58,  | (1.09,  | (0.37,  | <0.001 |
|                         |   |   |   |   | 29.56)  | 28.65)  | 0.13)   |        | 73.36)  | 84.65)   | 0.90)   |        | 2.18)   | 1.87)   | 1.02)   |        |

|                    |   |   |   |   |         |         |         |        |          |          |         |        |        |        |         |        |
|--------------------|---|---|---|---|---------|---------|---------|--------|----------|----------|---------|--------|--------|--------|---------|--------|
|                    |   |   |   |   | 2.37    | 2.83    | 0.62    |        | 4.90     | 6.55     | 1.00    |        | 0.08   | 0.11   | 1.07    |        |
| United Kingdom     | — | — | — | — | (2.17,  | (2.63,  | (0.39,  | <0.001 | (4.61,   | (6.23,   | (0.74,  | <0.001 | (0.05, | (0.08, | (0.16,  | 0.021  |
|                    |   |   |   |   | 2.59)   | 3.05)   | 0.85)   |        | 5.21)    | 6.88)    | 1.25)   |        | 0.13)  | 0.17)  | 1.99)   |        |
| United Republic of |   |   |   |   | 7.79    | 8.01    | 0.10    |        | 88.38    | 51.63    | -1.80   |        | 1.57   | 0.91   | -1.82   |        |
| Tanzania           | — | — | — | — | (7.17,  | (7.60,  | (0.08,  | <0.001 | (86.28,  | (50.60,  | (-2.07, | <0.001 | (1.30, | (0.77, | (-2.10, | <0.001 |
|                    |   |   |   |   | 8.46)   | 8.43)   | 0.12)   |        | 90.51)   | 52.66)   | -1.53)  |        | 1.88)  | 1.06)  | -1.55)  |        |
| United States of   |   |   |   |   | 58.96   | 64.45   | 0.35    |        | 28.91    | 52.41    | 2.09    |        | 0.43   | 0.85   | 2.40    |        |
| America            | — | — | — | — | (58.51, | (63.99, | (0.21,  | <0.001 | (28.59,  | (52.00,  | (1.85,  | <0.001 | (0.39, | (0.79, | (2.08,  | <0.001 |
|                    |   |   |   |   | 59.41)  | 64.92)  | 0.48)   |        | 29.23)   | 52.83)   | 2.33)   |        | 0.47)  | 0.90)  | 2.72)   |        |
| United States      |   |   |   |   | 6.97    | 6.84    | -0.06   |        | 54.45    | 32.32    | -1.70   |        | 0.97   | 0.57   | -1.68   |        |
| Virgin Islands     | — | — | — | — | (1.31,  | (0.97,  | (-0.09, | <0.001 | (34.01,  | (15.86,  | (-2.39, | <0.001 | (0.00, | (0.00, | (-2.51, | <0.001 |
|                    |   |   |   |   | 21.79)  | 24.53)  | -0.03)  |        | 83.08)   | 59.41)   | -1.00)  |        | 12.07) | 14.26) | -0.85)  |        |
| Uruguay            |   |   |   |   | 3.71    | 4.09    | 0.32    |        | 8.79     | 8.07     | -0.31   |        | 0.15   | 0.14   | -0.35   |        |
|                    | — | — | — | — | (2.67,  | (3.04,  | (0.22,  | <0.001 | (7.14,   | (6.57,   | (-0.63, | 0.054  | (0.01, | (0.01, | (-0.63, | 0.014  |
|                    |   |   |   |   | 5.03)   | 5.39)   | 0.42)   |        | 10.71)   | 9.82)    | 0.01)   |        | 0.61)  | 0.56)  | -0.07)  |        |
|                    |   |   |   |   | 8.99    | 9.00    | 0.00    |        | 20.79    | 22.84    | 0.38    |        | 0.36   | 0.39   | 0.37    |        |
| Uzbekistan         | — | — | — | — | (8.32,  | (8.52,  | (-0.03, | 0.995  | (19.77,  | (22.06,  | (0.07,  | 0.016  | (0.23, | (0.29, | (-0.08, | 0.104  |
|                    |   |   |   |   | 9.71)   | 9.51)   | 0.03)   |        | 21.84)   | 23.64)   | 0.70)   |        | 0.52)  | 0.51)  | 0.83)   |        |
|                    |   |   |   |   | 7.20    | 7.13    | -0.03   |        | 94.94    | 125.09   | 0.93    |        | 1.71   | 2.25   | 0.92    |        |
| Vanuatu            | — | — | — | — | (1.78,  | (2.96,  | (-0.05, | <0.001 | (69.93,  | (104.66, | (0.77,  | <0.001 | (0.03, | (0.35, | (0.75,  | <0.001 |
|                    |   |   |   |   | 19.61)  | 14.50)  | -0.02)  |        | 126.16)  | 148.43)  | 1.09)   |        | 11.03) | 7.59)  | 1.10)   |        |
| Venezuela          |   |   |   |   | 1.52    | 2.18    | 1.24    |        | 47.79    | 28.49    | -1.74   |        | 0.84   | 0.49   | -1.80   |        |
| (Bolivarian        | — | — | — | — | (1.26,  | (1.91,  | (1.14,  | <0.001 | (46.22,  | (27.50,  | (-2.70, | <0.001 | (0.65, | (0.37, | (-2.69, | <0.001 |
| Republic of)       |   |   |   |   | 1.82)   | 2.48)   | 1.34)   |        | 49.40)   | 29.51)   | -0.77)  |        | 1.08)  | 0.64)  | -0.90)  |        |
|                    |   |   |   |   | 10.20   | 10.32   | 0.04    |        | 46.64    | 26.39    | -1.94   |        | 0.83   | 0.46   | -2.01   |        |
| Viet Nam           | — | — | — | — | (9.80,  | (10.02, | (0.03,  | <0.001 | (45.78,  | (25.90,  | (-2.02, | <0.001 | (0.72, | (0.40, | (-2.17, | <0.001 |
|                    |   |   |   |   | 10.61)  | 10.62)  | 0.06)   |        | 47.51)   | 26.88)   | -1.86)  |        | 0.95)  | 0.53)  | -1.85)  |        |
|                    |   |   |   |   | 16.06   | 17.36   | 0.26    |        | 80.67    | 72.29    | -0.33   |        | 1.43   | 1.26   | -0.39   |        |
| Yemen              | — | — | — | — | (14.83, | (16.62, | (0.23,  | <0.001 | (77.89,  | (70.78,  | (-0.78, | 0.155  | (1.08, | (1.07, | (-0.75, | 0.032  |
|                    |   |   |   |   | 17.38)  | 18.13)  | 0.30)   |        | 83.52)   | 73.83)   | 0.13)   |        | 1.85)  | 1.48)  | -0.04)  |        |
|                    |   |   |   |   | 6.57    | 6.94    | 0.19    |        | 118.83   | 82.66    | -1.26   |        | 2.11   | 1.47   | -1.25   |        |
| Zambia             | — | — | — | — | (5.52,  | (6.29,  | (0.16,  | <0.001 | (114.32, | (80.44,  | (-1.50, | <0.001 | (1.54, | (1.19, | (-1.52, | <0.001 |
|                    |   |   |   |   | 7.78)   | 7.63)   | 0.23)   |        | 123.49)  | 84.94)   | -1.01)  |        | 2.83)  | 1.81)  | -0.97)  |        |

|                     |   |   |   |   |         |         |         |        |          |          |         |        |        |        |         |        |
|---------------------|---|---|---|---|---------|---------|---------|--------|----------|----------|---------|--------|--------|--------|---------|--------|
|                     |   |   |   |   | 1.34    | 1.26    | -0.22   |        | 34.30    | 42.50    | 0.69    | 0.61   | 0.75   | 0.66   |         |        |
| Zimbabwe            | — | — | — | — | (0.96,  | (0.98,  | (-0.29, | <0.001 | (32.28,  | (40.82,  | (-0.02, | 0.056  | (0.36, | (0.54, | (-0.00, | 0.051  |
|                     |   |   |   |   | 1.83)   | 1.60)   | -0.15)  |        | 36.41)   | 44.24)   | 1.40)   |        | 0.95)  | 1.01)  | 1.33)   |        |
| <b>Women</b>        |   |   |   |   |         |         |         |        |          |          |         |        |        |        |         |        |
|                     |   |   |   |   | 9.65    | 11.02   | 0.46    |        | 250.45   | 165.40   | -1.37   |        | 4.43   | 2.93   | -1.36   |        |
| Afghanistan         | — | — | — | — | (8.10,  | (10.12, | (0.43,  | <0.001 | (242.46, | (161.97, | (-1.49, | <0.001 | (3.42, | (2.49, | (-1.49, | <0.001 |
|                     |   |   |   |   | 11.44)  | 11.97)  | 0.49)   |        | 258.65)  | 168.89)  | -1.25)  |        | 5.67)  | 3.44)  | -1.23)  |        |
|                     |   |   |   |   | 1.17    | 1.00    | -0.53   |        | 7.35     | 3.65     | -2.54   |        | 0.13   | 0.06   | -2.97   |        |
| Albania             | — | — | — | — | (0.48,  | (0.30,  | (-0.62, | <0.001 | (5.42,   | (2.13,   | (-3.19, | <0.001 | (0.00, | (0.00, | (-3.61, | <0.001 |
|                     |   |   |   |   | 2.42)   | 2.45)   | -0.45)  |        | 9.79)    | 5.89)    | -1.89)  |        | 0.89)  | 0.99)  | -2.34)  |        |
|                     |   |   |   |   | 15.60   | 16.02   | 0.09    |        | 103.76   | 41.71    | -3.07   |        | 1.81   | 0.71   | -3.15   |        |
| Algeria             | — | — | — | — | (14.38, | (15.23, | (0.08,  | <0.001 | (100.65, | (40.39,  | (-3.23, | <0.001 | (1.41, | (0.55, | (-3.42, | <0.001 |
|                     |   |   |   |   | 16.91)  | 16.85)  | 0.11)   |        | 106.95)  | 43.06)   | -2.91)  |        | 2.28)  | 0.91)  | -2.88)  |        |
|                     |   |   |   |   | 5.54    | 5.59    | 0.03    |        | 36.56    | 27.63    | -0.95   |        | 0.65   | 0.49   | -0.95   |        |
| American Samoa      | — | — | — | — | (0.00,  | (0.00,  | (0.01,  | 0.001  | (8.01,   | (4.46,   | (-1.23, | <0.001 | (0.00, | (0.00, | (-1.24, | <0.001 |
|                     |   |   |   |   | 58.08)  | 56.18)  | 0.04)   |        | 107.16)  | 92.05)   | -0.67)  |        | 48.99) | 46.61) | -0.66)  |        |
|                     |   |   |   |   | 3.97    | 2.86    | -1.13   |        | 6.80     | 4.80     | -1.17   |        | 0.11   | 0.08   | -1.08   |        |
| Andorra             | — | — | — | — | (0.00,  | (0.00,  | (-1.17, | <0.001 | (0.09,   | (0.02,   | (-1.27, | <0.001 | (0.00, | (0.00, | (-1.79, | 0.003  |
|                     |   |   |   |   | 49.05)  | 43.98)  | -1.09)  |        | 53.61)   | 47.08)   | -1.06)  |        | 42.95) | 39.72) | -0.37)  |        |
|                     |   |   |   |   | 3.74    | 4.03    | 0.26    |        | 108.15   | 58.78    | -2.10   |        | 1.93   | 1.04   | -2.14   |        |
| Angola              | — | — | — | — | (2.85,  | (3.48,  | (0.21,  | <0.001 | (103.22, | (56.68,  | (-2.47, | <0.001 | (1.32, | (0.78, | (-2.50, | <0.001 |
|                     |   |   |   |   | 4.81)   | 4.64)   | 0.31)   |        | 113.26)  | 60.95)   | -1.72)  |        | 2.74)  | 1.37)  | -1.77)  |        |
|                     |   |   |   |   | 11.57   | 11.19   | -0.11   |        | 51.20    | 32.01    | -1.64   |        | 0.90   | 0.55   | -1.68   |        |
| Antigua and Barbuda | — | — | — | — | (0.79,  | (1.46,  | (-0.15, | <0.001 | (19.70,  | (11.67,  | (-1.98, | <0.001 | (0.00, | (0.00, | (-2.04, | <0.001 |
|                     |   |   |   |   | 51.77)  | 42.34)  | -0.07)  |        | 109.44)  | 72.17)   | -1.30)  |        | 33.04) | 25.10) | -1.32)  |        |
|                     |   |   |   |   | 1.45    | 2.43    | 1.80    |        | 19.81    | 10.53    | -2.18   |        | 0.35   | 0.18   | -2.22   |        |
| Argentina           | — | — | — | — | (1.16,  | (2.12,  | (1.59,  | <0.001 | (18.71,  | (9.87,   | (-2.56, | <0.001 | (0.22, | (0.10, | (-2.79, | <0.001 |
|                     |   |   |   |   | 1.79)   | 2.77)   | 2.02)   |        | 20.97)   | 11.22)   | -1.79)  |        | 0.53)  | 0.29)  | -1.65)  |        |
|                     |   |   |   |   | 0.67    | 0.64    | -0.17   |        | 2.03     | 1.64     | -0.72   |        | 0.04   | 0.03   | -1.10   |        |
| Armenia             | — | — | — | — | (0.21,  | (0.18,  | (-0.27, | <0.001 | (1.12,   | (0.78,   | (-1.49, | 0.070  | (0.00, | (0.00, | (-4.38, | 0.519  |
|                     |   |   |   |   | 1.62)   | 1.91)   | -0.08)  |        | 3.41)    | 3.25)    | 0.06)   |        | 0.66)  | 1.08)  | 2.29)   |        |
|                     |   |   |   |   | 2.10    | 1.44    | -1.29   |        | 2.15     | 1.57     | -1.05   |        | 0.04   | 0.03   | -0.86   |        |
| Australia           | — | — | — | — | (1.65,  | (1.11,  | (-1.34, | <0.001 | (1.70,   | (1.22,   | (-1.31, | <0.001 | (0.00, | (0.00, | (-0.86, | <0.001 |

|            |   |   |   |   |        |        |         |        |          |         |         |        |        |        |         |        |
|------------|---|---|---|---|--------|--------|---------|--------|----------|---------|---------|--------|--------|--------|---------|--------|
|            |   |   |   |   | 2.64)  | 1.84)  | -1.25)  |        | 2.70)    | 1.99)   | -0.79)  |        | 0.18)  | 0.16)  | -0.86)  |        |
|            |   |   |   |   | 2.49   | 1.65   | -1.42   |        | 3.06     | 2.93    | -0.13   |        | 0.05   | 0.05   | 0.00    |        |
| Austria    | — | — | — | — | (1.75, | (1.07, | (-1.56, | <0.001 | (2.23,   | (2.10,  | (-0.66, | 0.628  | (0.00, | (0.00, | (0.00,  | <0.001 |
|            |   |   |   |   | 3.45)  | 2.48)  | -1.29)  |        | 4.13)    | 4.01)   | 0.40)   |        | 0.40)  | 0.45)  | 0.00)*  |        |
|            |   |   |   |   | 2.19   | 2.05   | -0.24   |        | 36.49    | 21.20   | -2.05   |        | 0.63   | 0.36   | -2.14   |        |
| Azerbaijan | — | — | — | — | (1.49, | (1.51, | (-0.29, | <0.001 | (33.50,  | (19.29, | (-3.11, | <0.001 | (0.29, | (0.15, | (-3.23, | <0.001 |
|            |   |   |   |   | 3.12)  | 2.75)  | -0.19)  |        | 39.69)   | 23.28)  | -0.97)  |        | 1.21)  | 0.76)  | -1.03)  |        |
|            |   |   |   |   | 10.75  | 10.62  | -0.05   |        | 132.79   | 118.72  | -0.46   |        | 2.37   | 2.12   | -0.42   |        |
| Bahamas    | — | — | — | — | (3.88, | (4.71, | (-0.09, | 0.014  | (103.94, | (95.93, | (-0.71, | <0.001 | (0.12, | (0.19, | (-0.70, | 0.003  |
|            |   |   |   |   | 24.02) | 20.87) | -0.01)  |        | 167.43)  | 145.49) | -0.21)  |        | 11.74) | 8.88)  | -0.14)  |        |
|            |   |   |   |   | 13.85  | 13.85  | -0.00   |        | 31.30    | 15.08   | -2.51   |        | 0.50   | 0.24   | -2.40   |        |
| Bahrain    | — | — | — | — | (7.34, | (9.89, | (-0.04, | 0.804  | (21.03,  | (10.69, | (-3.71, | <0.001 | (0.00, | (0.00, | (-4.11, | 0.007  |
|            |   |   |   |   | 24.07) | 19.16) | 0.03)   |        | 45.12)   | 20.88)  | -1.30)  |        | 5.56)  | 2.40)  | -0.66)  |        |
|            |   |   |   |   | 2.19   | 2.43   | 0.35    |        | 55.80    | 19.74   | -3.40   |        | 0.98   | 0.35   | -3.39   |        |
| Bangladesh | — | — | — | — | (1.97, | (2.26, | (0.28,  | <0.001 | (54.68,  | (19.27, | (-4.22, | <0.001 | (0.84, | (0.29, | (-4.24, | <0.001 |
|            |   |   |   |   | 2.43)  | 2.60)  | 0.42)   |        | 56.93)   | 20.22)  | -2.57)  |        | 1.15)  | 0.42)  | -2.53)  |        |
|            |   |   |   |   | 6.53   | 6.48   | -0.03   |        | 23.05    | 19.50   | -0.57   |        | 0.40   | 0.34   | -0.54   |        |
| Barbados   | — | — | — | — | (1.66, | (1.59, | (-0.06, | 0.096  | (12.24,  | (9.56,  | (-0.97, | 0.006  | (0.00, | (0.00, | (-0.95, | 0.011  |
|            |   |   |   |   | 17.77) | 18.42) | 0.01)   |        | 39.79)   | 36.01)  | -0.16)  |        | 8.02)  | 8.89)  | -0.12)  |        |
|            |   |   |   |   | 0.26   | 0.26   | 0.03    |        | 5.12     | 2.39    | -2.60   |        | 0.09   | 0.04   | -2.92   |        |
| Belarus    | — | — | — | — | (0.09, | (0.08, | (0.03,  | <0.001 | (4.20,   | (1.74,  | (-3.47, | <0.001 | (0.01, | (0.00, | (-4.09, | <0.001 |
|            |   |   |   |   | 0.61)  | 0.73)  | 0.03)   |        | 6.19)    | 3.27)   | -1.72)  |        | 0.37)  | 0.44)  | -1.73)  |        |
|            |   |   |   |   | 2.29   | 1.69   | -1.04   |        | 2.39     | 1.75    | -1.09   |        | 0.04   | 0.03   | -0.97   |        |
| Belgium    | — | — | — | — | (1.67, | (1.16, | (-1.10, | <0.001 | (1.74,   | (1.19,  | (-1.45, | <0.001 | (0.00, | (0.00, | (-0.97, | <0.001 |
|            |   |   |   |   | 3.09)  | 2.41)  | -0.98)  |        | 3.22)    | 2.49)   | -0.72)  |        | 0.31)  | 0.31)  | -0.97)  |        |
|            |   |   |   |   | 6.90   | 7.04   | 0.07    |        | 30.15    | 36.12   | 0.65    |        | 0.53   | 0.63   | 0.63    |        |
| Belize     | — | — | — | — | (0.77, | (2.53, | (0.04,  | <0.001 | (13.53,  | (24.45, | (-0.05, | 0.068  | (0.00, | (0.00, | (-0.21, | 0.141  |
|            |   |   |   |   | 26.89) | 15.57) | 0.09)   |        | 59.08)   | 51.51)  | 1.35)   |        | 16.19) | 5.81)  | 1.48)   |        |
|            |   |   |   |   | 6.31   | 6.47   | 0.09    |        | 67.61    | 82.41   | 0.69    |        | 1.19   | 1.44   | 0.67    |        |
| Benin      | — | — | — | — | (4.66, | (5.41, | (0.07,  | <0.001 | (62.04,  | (78.63, | (0.34,  | <0.001 | (0.55, | (0.97, | (0.47,  | <0.001 |
|            |   |   |   |   | 8.36)  | 7.67)  | 0.11)   |        | 73.56)   | 86.33)  | 1.04)   |        | 2.25)  | 2.05)  | 0.86)   |        |
|            |   |   |   |   | 4.90   | 4.77   | -0.10   |        | 10.02    | 4.86    | -2.54   |        | 0.17   | 0.08   | -2.59   |        |
| Bermuda    | — | — | — | — | (0.04, | (0.01, | (-0.12, | <0.001 | (0.64,   | (0.01,  | (-2.93, | <0.001 | (0.00, | (0.00, | (-3.16, | <0.001 |



|                   |   |   |   |   |        |        |         |        |          |         |         |        |        |        |         |        |
|-------------------|---|---|---|---|--------|--------|---------|--------|----------|---------|---------|--------|--------|--------|---------|--------|
|                   |   |   |   |   | 48.26) | 59.80) | -0.08)  |        | 55.98)   | 60.09)  | -2.14)  |        | 41.33) | 52.74) | -2.03)  |        |
|                   |   |   |   |   | 1.16   | 1.28   | 0.35    |        | 29.94    | 13.33   | -2.75   |        | 0.53   | 0.24   | -2.72   |        |
| Bhutan            | — | — | — | — | (0.04, | (0.16, | (0.33,  | <0.001 | (19.98,  | (8.32,  | (-3.03, | <0.001 | (0.00, | (0.00, | (-3.13, | <0.001 |
|                   |   |   |   |   | 6.49)  | 4.58)  | 0.38)   |        | 43.34)   | 20.30)  | -2.46)  |        | 5.41)  | 2.83)  | -2.31)  |        |
| Bolivia           |   |   |   |   | 1.23   | 1.39   | 0.41    |        | 70.69    | 31.61   | -2.76   |        | 1.22   | 0.55   | -2.76   |        |
| (Plurinational    | — | — | — | — | (0.70, | (0.96, | (0.33,  | <0.001 | (65.93,  | (29.37, | (-2.89, | <0.001 | (0.67, | (0.29, | (-2.90, | <0.001 |
| State of)         |   |   |   |   | 2.04)  | 1.93)  | 0.50)   |        | 75.72)   | 33.98)  | -2.63)  |        | 2.07)  | 0.95)  | -2.63)  |        |
| Bosnia and        |   |   |   |   | 2.61   | 2.15   | -0.63   |        | 12.21    | 8.44    | -1.39   |        | 0.22   | 0.15   | -1.40   |        |
| Herzegovina       | — | — | — | — | (1.69, | (1.13, | (-0.79, | <0.001 | (10.09,  | (6.22,  | (-2.08, | <0.001 | (0.03, | (0.00, | (-1.97, | <0.001 |
|                   |   |   |   |   | 3.88)  | 3.84)  | -0.47)  |        | 14.66)   | 11.28)  | -0.69)  |        | 0.79)  | 1.13)  | -0.83)  |        |
|                   |   |   |   |   | 1.99   | 1.96   | -0.04   |        | 68.00    | 64.02   | -0.19   |        | 1.23   | 1.15   | -0.21   |        |
| Botswana          | — | — | — | — | (0.57, | (0.97, | (-0.12, | 0.270  | (57.50,  | (57.51, | (-0.69, | 0.463  | (0.22, | (0.44, | (-0.76, | 0.440  |
|                   |   |   |   |   | 5.05)  | 3.57)  | 0.03)   |        | 79.93)   | 71.10)  | 0.32)   |        | 3.93)  | 2.50)  | 0.33)   |        |
|                   |   |   |   |   | 2.48   | 3.42   | 1.12    |        | 46.27    | 21.48   | -2.58   |        | 0.83   | 0.38   | -2.58   |        |
| Brazil            | — | — | — | — | (2.31, | (3.25, | (1.04,  | <0.001 | (45.49,  | (21.06, | (-2.88, | <0.001 | (0.73, | (0.33, | (-2.95, | <0.001 |
|                   |   |   |   |   | 2.67)  | 3.59)  | 1.20)   |        | 47.06)   | 21.90)  | -2.29)  |        | 0.94)  | 0.44)  | -2.22)  |        |
|                   |   |   |   |   | 5.82   | 4.85   | -0.65   |        | 39.92    | 19.45   | -2.52   |        | 0.68   | 0.33   | -2.52   |        |
| Brunei Darussalam | — | — | — | — | (1.29, | (1.55, | (-0.72, | <0.001 | (25.06,  | (11.67, | (-2.72, | <0.001 | (0.00, | (0.00, | (-2.79, | <0.001 |
|                   |   |   |   |   | 16.88) | 12.04) | -0.58)  |        | 60.67)   | 30.86)  | -2.32)  |        | 8.67)  | 5.34)  | -2.25)  |        |
|                   |   |   |   |   | 4.14   | 3.21   | -0.87   |        | 26.56    | 49.76   | 2.28    |        | 0.47   | 0.88   | 2.30    |        |
| Bulgaria          | — | — | — | — | (3.20, | (2.26, | (-0.91, | <0.001 | (24.07,  | (45.63, | (2.04,  | <0.001 | (0.19, | (0.41, | (2.04,  | <0.001 |
|                   |   |   |   |   | 5.29)  | 4.50)  | -0.82)  |        | 29.25)   | 54.22)  | 2.53)   |        | 0.96)  | 1.73)  | 2.56)   |        |
|                   |   |   |   |   | 5.36   | 5.58   | 0.13    |        | 72.63    | 86.47   | 0.68    |        | 1.29   | 1.53   | 0.67    |        |
| Burkina Faso      | — | — | — | — | (4.23, | (4.86, | (0.10,  | <0.001 | (68.35,  | (83.59, | (0.29,  | 0.001  | (0.77, | (1.16, | (0.26,  | 0.001  |
|                   |   |   |   |   | 6.71)  | 6.39)  | 0.17)   |        | 77.12)   | 89.42)  | 1.07)   |        | 2.03)  | 1.97)  | 1.09)   |        |
|                   |   |   |   |   | 5.97   | 6.14   | 0.10    |        | 153.50   | 69.52   | -2.71   |        | 2.73   | 1.22   | -2.76   |        |
| Burundi           | — | — | — | — | (4.47, | (5.08, | (0.08,  | <0.001 | (145.60, | (65.94, | (-2.92, | <0.001 | (1.76, | (0.79, | (-2.96, | <0.001 |
|                   |   |   |   |   | 7.83)  | 7.35)  | 0.12)   |        | 161.73)  | 73.26)  | -2.50)  |        | 4.05)  | 1.82)  | -2.55)  |        |
|                   |   |   |   |   | 8.86   | 9.14   | 0.11    |        | 111.94   | 46.52   | -2.97   |        | 1.96   | 0.80   | -3.03   |        |
| Cabo Verde        | — | — | — | — | (2.70, | (4.51, | (0.09,  | <0.001 | (85.74,  | (35.00, | (-3.31, | <0.001 | (0.06, | (0.02, | (-3.44, | <0.001 |
|                   |   |   |   |   | 22.07) | 16.57) | 0.12)   |        | 144.18)  | 60.69)  | -2.62)  |        | 11.65) | 4.81)  | -2.63)  |        |
|                   |   |   |   |   | 4.71   | 5.07   | 0.26    |        | 68.63    | 36.77   | -2.10   |        | 1.23   | 0.66   | -2.11   |        |
| Cambodia          | — | — | — | — | (3.75, | (4.35, | (0.24,  | <0.001 | (64.86,  | (34.78, | (-2.19, | <0.001 | (0.77, | (0.42, | (-2.21, | <0.001 |

|                          |   |   |   |   |         |         |         |        |          |         |         |        |         |         |         |        |
|--------------------------|---|---|---|---|---------|---------|---------|--------|----------|---------|---------|--------|---------|---------|---------|--------|
|                          |   |   |   |   | 5.85)   | 5.88)   | 0.28)   |        | 72.58)   | 38.84)  | -2.02)  |        | 1.87)   | 0.99)   | -2.02)  |        |
|                          |   |   |   |   | 3.69    | 4.75    | 0.86    |        | 85.69    | 86.53   | 0.08    |        | 1.52    | 1.52    | 0.05    |        |
| Cameroon                 | — | — | — | — | (2.81,  | (4.18,  | (0.75,  | <0.001 | (81.28,  | (84.06, | (-0.10, | 0.390  | (0.98,  | (1.21,  | (-0.16, | 0.669  |
|                          |   |   |   |   | 4.77)   | 5.38)   | 0.96)   |        | 90.29)   | 89.04)  | 0.25)   |        | 2.26)   | 1.89)   | 0.26)   |        |
|                          |   |   |   |   | 17.70   | 10.61   | -1.75   |        | 3.65     | 2.97    | -0.71   |        | 0.04    | 0.04    | -0.12   |        |
| Canada                   | — | — | — | — | (16.67, | (9.83,  | (-1.82, | <0.001 | (3.19,   | (2.56,  | (-0.93, | <0.001 | (0.01,  | (0.01,  | (-1.07, | 0.805  |
|                          |   |   |   |   | 18.78)  | 11.44)  | -1.68)  |        | 4.17)    | 3.44)   | -0.49)  |        | 0.14)   | 0.14)   | 0.84)   |        |
|                          |   |   |   |   | 2.79    | 2.59    | -0.26   |        | 123.24   | 106.11  | -0.41   |        | 2.22    | 1.90    | -0.43   |        |
| Central African Republic | — | — | — | — | (1.43,  | (1.64,  | (-0.32, | <0.001 | (113.02, | (99.56, | (-0.57, | <0.001 | (1.04,  | (1.12,  | (-0.59, | <0.001 |
|                          |   |   |   |   | 4.95)   | 3.89)   | -0.21)  |        | 134.18)  | 112.99) | -0.25)  |        | 4.20)   | 3.05)   | -0.27)  |        |
|                          |   |   |   |   | 5.34    | 5.49    | 0.10    |        | 78.73    | 103.29  | 1.00    |        | 1.39    | 1.82    | 0.99    |        |
| Chad                     | — | — | — | — | (3.96,  | (4.58,  | (0.05,  | <0.001 | (73.22,  | (99.32, | (0.61,  | <0.001 | (0.75,  | (1.32,  | (0.57,  | <0.001 |
|                          |   |   |   |   | 7.06)   | 6.54)   | 0.14)   |        | 84.54)   | 107.39) | 1.40)   |        | 2.38)   | 2.45)   | 1.40)   |        |
|                          |   |   |   |   | 2.24    | 4.45    | 2.35    |        | 5.81     | 5.23    | -0.36   |        | 0.10    | 0.09    | -0.28   |        |
| Chile                    | — | — | — | — | (1.72,  | (3.78,  | (2.22,  | <0.001 | (4.94,   | (4.51,  | (-0.84, | 0.152  | (0.02,  | (0.02,  | (-0.47, | 0.004  |
|                          |   |   |   |   | 2.86)   | 5.20)   | 2.47)   |        | 6.79)    | 6.05)   | 0.13)   |        | 0.31)   | 0.27)   | -0.10)  |        |
|                          |   |   |   |   | 9.85    | 11.27   | 0.45    |        | 44.33    | 11.94   | -4.35   |        | 0.76    | 0.19    | -4.53   |        |
| China                    | — | — | — | — | (9.73,  | (11.15, | (0.34,  | <0.001 | (44.06,  | (11.81, | (-5.06, | <0.001 | (0.73,  | (0.17,  | (-5.01, | <0.001 |
|                          |   |   |   |   | 9.98)   | 11.40)  | 0.55)   |        | 44.59)   | 12.07)  | -3.64)  |        | 0.80)   | 0.21)   | -4.04)  |        |
|                          |   |   |   |   | 4.18    | 4.59    | 0.33    |        | 26.42    | 8.84    | -3.67   |        | 0.47    | 0.15    | -3.74   |        |
| Colombia                 | — | — | — | — | (3.69,  | (4.17,  | (0.24,  | <0.001 | (25.17,  | (8.26,  | (-4.03, | <0.001 | (0.31,  | (0.08,  | (-4.24, | <0.001 |
|                          |   |   |   |   | 4.72)   | 5.04)   | 0.41)   |        | 27.71)   | 9.45)   | -3.30)  |        | 0.67)   | 0.25)   | -3.24)  |        |
|                          |   |   |   |   | 8.31    | 8.54    | 0.08    |        | 129.33   | 72.92   | -1.95   |        | 2.29    | 1.28    | -1.97   |        |
| Comoros                  | — | — | — | — | (2.92,  | (4.31,  | (0.03,  | 0.001  | (104.20, | (59.26, | (-4.42, | 0.132  | (0.19,  | (0.12,  | (-4.37, | 0.114  |
|                          |   |   |   |   | 18.82)  | 15.23)  | 0.13)   |        | 158.95)  | 88.86)  | 0.60)   |        | 9.93)   | 5.16)   | 0.48)   |        |
|                          |   |   |   |   | 3.52    | 3.56    | 0.04    |        | 127.40   | 78.62   | -1.68   |        | 2.30    | 1.41    | -1.70   |        |
| Congo                    | — | — | — | — | (1.88,  | (2.51,  | (0.01,  | 0.008  | (116.35, | (73.35, | (-2.39, | <0.001 | (1.03,  | (0.79,  | (-2.40, | <0.001 |
|                          |   |   |   |   | 6.04)   | 4.90)   | 0.07)   |        | 139.25)  | 84.17)  | -0.97)  |        | 4.45)   | 2.34)   | -1.00)  |        |
|                          |   |   |   |   | 26.64   | 26.79   | 0.02    |        | 351.33   | 135.95  | -3.22   |        | 6.24    | 2.39    | -3.25   |        |
| Cook Islands             | — | — | — | — | (0.43,  | (0.33,  | (0.01,  | 0.004  | (179.32, | (38.25, | (-3.32, | <0.001 | (0.00,  | (0.00,  | (-3.35, | <0.001 |
|                          |   |   |   |   | 169.70) | 174.42) | 0.03)   |        | 623.22)  | 344.17) | -3.12)  |        | 133.02) | 128.71) | -3.15)  |        |
|                          |   |   |   |   | 2.86    | 3.45    | 0.64    |        | 9.89     | 8.53    | -0.53   |        | 0.17    | 0.15    | -0.43   |        |
| Costa Rica               | — | — | — | — | (1.66,  | (2.42,  | (0.62,  | <0.001 | (7.52,   | (6.84,  | (-1.02, | 0.033  | (0.00,  | (0.01,  | (-1.11, | 0.210  |

|                   |   |   |   |   |        |        |         |        |         |         |         |        |        |        |         |        |
|-------------------|---|---|---|---|--------|--------|---------|--------|---------|---------|---------|--------|--------|--------|---------|--------|
|                   |   |   |   |   | 4.61)  | 4.82)  | 0.67)   |        | 12.80)  | 10.54)  | -0.04)  |        | 1.00)  | 0.69)  | 0.25)   |        |
|                   |   |   |   |   | 5.36   | 5.28   | -0.05   |        | 73.88   | 90.09   | 0.68    |        | 1.29   | 1.57   | 0.68    |        |
| Cote d'Ivoire     | — | — | — | — | (4.34, | (4.65, | (-0.09, | 0.017  | (70.06, | (87.47, | (0.11,  | 0.019  | (0.83, | (1.24, | (0.27,  | 0.001  |
|                   |   |   |   |   | 6.56)  | 5.97)  | -0.01)  |        | 77.86)  | 92.77)  | 1.25)   |        | 1.94)  | 1.97)  | 1.10)   |        |
|                   |   |   |   |   | 2.32   | 1.37   | -1.82   |        | 6.31    | 3.50    | -1.95   |        | 0.11   | 0.06   | -1.84   |        |
| Croatia           | — | — | — | — | (1.47, | (0.65, | (-1.91, | <0.001 | (4.81,  | (2.26,  | (-2.93, | <0.001 | (0.00, | (0.00, | (-2.09, | <0.001 |
|                   |   |   |   |   | 3.53)  | 2.67)  | -1.74)  |        | 8.15)   | 5.28)   | -0.95)  |        | 0.67)  | 0.88)  | -1.59)  |        |
|                   |   |   |   |   | 4.35   | 4.13   | -0.17   |        | 10.54   | 11.44   | 0.26    |        | 0.18   | 0.20   | 0.35    |        |
| Cuba              | — | — | — | — | (3.50, | (3.26, | (-0.25, | <0.001 | (9.20,  | (9.95,  | (-0.28, | 0.348  | (0.05, | (0.05, | (-0.12, | 0.144  |
|                   |   |   |   |   | 5.35)  | 5.18)  | -0.09)  |        | 12.03)  | 13.11)  | 0.80)   |        | 0.48)  | 0.56)  | 0.82)   |        |
|                   |   |   |   |   | 1.16   | 0.92   | -0.80   |        | 1.75    | 0.93    | -2.10   |        | 0.03   | 0.01   | -4.13   |        |
| Cyprus            | — | — | — | — | (0.12, | (0.17, | (-0.90, | <0.001 | (0.31,  | (0.13,  | (-3.16, | <0.001 | (0.00, | (0.00, | (-6.98, | 0.006  |
|                   |   |   |   |   | 4.72)  | 3.77)  | -0.70)  |        | 5.65)   | 3.91)   | -1.04)  |        | 2.81)  | 2.57)  | -1.19)  |        |
|                   |   |   |   |   | 1.91   | 1.53   | -0.76   |        | 3.79    | 5.01    | 1.30    |        | 0.06   | 0.09   | 1.13    |        |
| Czechia           | — | — | — | — | (1.35, | (1.02, | (-0.79, | <0.001 | (2.98,  | (4.00,  | (0.74,  | <0.001 | (0.00, | (0.01, | (-0.53, | 0.184  |
|                   |   |   |   |   | 2.64)  | 2.27)  | -0.73)  |        | 4.76)   | 6.25)   | 1.87)   |        | 0.34)  | 0.48)  | 2.82)   |        |
| Democratic        |   |   |   |   | 5.03   | 4.71   | -0.23   |        | 30.07   | 27.84   | -0.25   |        | 0.52   | 0.48   | -0.26   |        |
| People's Republic | — | — | — | — | (4.34, | (4.12, | (-0.27, | <0.001 | (28.38, | (26.38, | (-0.32, | <0.001 | (0.32, | (0.31, | (-0.48, | 0.022  |
| of Korea          |   |   |   |   | 5.80)  | 5.36)  | -0.20)  |        | 31.84)  | 29.37)  | -0.18)  |        | 0.81)  | 0.72)  | -0.04)  |        |
| Democratic        |   |   |   |   | 3.92   | 3.84   | -0.06   |        | 95.66   | 71.10   | -1.06   |        | 1.71   | 1.27   | -1.06   |        |
| Republic of the   | — | — | — | — | (3.42, | (3.52, | (-0.09, | <0.001 | (93.20, | (69.73, | (-1.26, | <0.001 | (1.39, | (1.09, | (-1.26, | <0.001 |
| Congo             |   |   |   |   | 4.46)  | 4.18)  | -0.04)  |        | 98.17)  | 72.50)  | -0.85)  |        | 2.08)  | 1.47)  | -0.86)  |        |
|                   |   |   |   |   | 1.00   | 0.66   | -1.42   |        | 1.51    | 0.88    | -1.83   |        | 0.03   | 0.01   | -3.55   |        |
| Denmark           | — | — | — | — | (0.47, | (0.24, | (-1.57, | <0.001 | (0.84,  | (0.38,  | (-2.58, | <0.001 | (0.00, | (0.00, | (-3.55, | <0.001 |
|                   |   |   |   |   | 1.88)  | 1.48)  | -1.26)  |        | 2.54)   | 1.78)   | -1.07)  |        | 0.50)  | 0.51)  | -3.55)  |        |
|                   |   |   |   |   | 7.90   | 8.07   | 0.07    |        | 103.38  | 50.82   | -2.27   |        | 1.84   | 0.90   | -2.30   |        |
| Djibouti          | — | — | — | — | (2.77, | (5.01, | (-0.03, | 0.158  | (81.35, | (42.50, | (-2.89, | <0.001 | (0.10, | (0.14, | (-2.92, | <0.001 |
|                   |   |   |   |   | 17.87) | 12.46) | 0.17)   |        | 129.72) | 60.41)  | -1.65)  |        | 8.87)  | 3.21)  | -1.67)  |        |
|                   |   |   |   |   | 7.74   | 7.66   | -0.04   |        | 85.66   | 71.34   | -0.55   |        | 1.52   | 1.26   | -0.56   |        |
| Dominica          | — | — | — | — | (0.13, | (0.17, | (-0.10, | 0.274  | (41.20, | (32.58, | (-0.99, | 0.015  | (0.00, | (0.00, | (-1.04, | 0.023  |
|                   |   |   |   |   | 49.03) | 44.31) | 0.03)   |        | 158.81) | 135.85) | -0.10)  |        | 37.77) | 32.54) | -0.08)  |        |
| Dominican         |   |   |   |   | 7.01   | 7.38   | 0.17    |        | 50.07   | 45.98   | -0.26   |        | 0.87   | 0.80   | -0.25   |        |
| Republic          | — | — | — | — | (5.64, | (6.27, | (0.12,  | <0.001 | (46.39, | (43.17, | (-0.72, | 0.276  | (0.44, | (0.47, | (-0.70, | 0.287  |

|                   |   |   |   |   |         |         |         |        |          |         |         |        |        |        |         |        |
|-------------------|---|---|---|---|---------|---------|---------|--------|----------|---------|---------|--------|--------|--------|---------|--------|
|                   |   |   |   |   | 8.61)   | 8.62)   | 0.21)   |        | 53.98)   | 48.94)  | 0.21)   |        | 1.55)  | 1.29)  | 0.21)   |        |
|                   |   |   |   |   | 2.40    | 6.29    | 3.36    |        | 62.03    | 35.00   | -2.03   |        | 1.07   | 0.60   | -2.01   |        |
| Ecuador           | — | — | — | — | (1.78,  | (5.49,  | (3.22,  | <0.001 | (58.52,  | (33.07, | (-2.81, | <0.001 | (0.66, | (0.37, | (-2.83, | <0.001 |
|                   |   |   |   |   | 3.19)   | 7.18)   | 3.50)   |        | 65.70)   | 37.01)  | -1.25)  |        | 1.67)  | 0.91)  | -1.19)  |        |
|                   |   |   |   |   | 12.24   | 13.14   | 0.24    |        | 131.42   | 65.47   | -2.36   |        | 2.23   | 1.11   | -2.37   |        |
| Egypt             | — | — | — | — | (11.53, | (12.64, | (0.22,  | <0.001 | (129.18, | (64.35, | (-3.00, | <0.001 | (1.95, | (0.97, | (-3.03, | <0.001 |
|                   |   |   |   |   | 12.97)  | 13.67)  | 0.27)   |        | 133.69)  | 66.61)  | -1.73)  |        | 2.55)  | 1.27)  | -1.70)  |        |
|                   |   |   |   |   | 1.80    | 3.45    | 2.28    |        | 23.00    | 12.03   | -2.12   |        | 0.40   | 0.20   | -2.41   |        |
| El Salvador       | — | — | — | — | (1.05,  | (2.51,  | (2.20,  | <0.001 | (20.04,  | (10.21, | (-3.33, | 0.001  | (0.10, | (0.04, | (-2.88, | <0.001 |
|                   |   |   |   |   | 2.92)   | 4.63)   | 2.36)   |        | 26.29)   | 14.08)  | -0.91)  |        | 1.09)  | 0.65)  | -1.95)  |        |
|                   |   |   |   |   | 3.22    | 3.85    | 0.63    |        | 117.64   | 41.63   | -3.48   |        | 2.12   | 0.74   | -3.51   |        |
| Equatorial Guinea | — | — | — | — | (0.48,  | (1.76,  | (0.56,  | <0.001 | (93.98,  | (33.89, | (-3.95, | <0.001 | (0.16, | (0.07, | (-4.03, | <0.001 |
|                   |   |   |   |   | 10.96)  | 7.37)   | 0.69)   |        | 145.56)  | 50.67)  | -3.00)  |        | 9.19)  | 2.98)  | -2.98)  |        |
|                   |   |   |   |   | 5.84    | 6.68    | 0.46    |        | 170.26   | 92.74   | -2.08   |        | 3.06   | 1.66   | -2.10   |        |
| Eritrea           | — | — | — | — | (3.87,  | (5.28,  | (0.43,  | <0.001 | (158.79, | (87.35, | (-2.18, | <0.001 | (1.70, | (1.01, | (-2.20, | <0.001 |
|                   |   |   |   |   | 8.49)   | 8.35)   | 0.49)   |        | 182.38)  | 98.38)  | -1.98)  |        | 5.12)  | 2.59)  | -2.00)  |        |
|                   |   |   |   |   | 0.72    | 0.72    | 0.01    |        | 2.48     | 6.14    | 3.36    |        | 0.04   | 0.11   | 3.24    |        |
| Estonia           | — | — | — | — | (0.10,  | (0.06,  | (-0.14, | 0.945  | (1.04,   | (3.40,  | (1.93,  | <0.001 | (0.00, | (0.00, | (1.64,  | <0.001 |
|                   |   |   |   |   | 2.66)   | 3.73)   | 0.15)   |        | 5.12)    | 10.75)  | 4.81)   |        | 1.59)  | 2.86)  | 4.85)   |        |
|                   |   |   |   |   | 1.86    | 1.78    | -0.15   |        | 74.32    | 66.25   | -0.45   |        | 1.34   | 1.19   | -0.44   |        |
| Eswatini          | — | — | — | — | (0.28,  | (0.50,  | (-0.21, | <0.001 | (60.11,  | (56.29, | (-0.96, | 0.088  | (0.12, | (0.23, | (-0.93, | 0.074  |
|                   |   |   |   |   | 6.43)   | 4.55)   | -0.09)  |        | 91.02)   | 77.50)  | 0.07)   |        | 5.60)  | 3.68)  | 0.04)   |        |
|                   |   |   |   |   | 5.83    | 6.40    | 0.33    |        | 194.74   | 43.09   | -5.07   |        | 3.48   | 0.76   | -5.12   |        |
| Ethiopia          | — | — | — | — | (5.32,  | (6.03,  | (0.30,  | <0.001 | (191.74, | (42.16, | (-5.28, | <0.001 | (3.09, | (0.64, | (-5.36, | <0.001 |
|                   |   |   |   |   | 6.39)   | 6.78)   | 0.35)   |        | 197.78)  | 44.04)  | -4.86)  |        | 3.91)  | 0.89)  | -4.89)  |        |
|                   |   |   |   |   | 10.54   | 10.27   | -0.09   |        | 118.75   | 88.52   | -1.05   |        | 2.10   | 1.56   | -1.05   |        |
| Fiji              | — | — | — | — | (5.91,  | (6.13,  | (-0.10, | <0.001 | (101.77, | (75.24, | (-1.47, | <0.001 | (0.44, | (0.30, | (-1.52, | <0.001 |
|                   |   |   |   |   | 17.42)  | 16.20)  | -0.07)  |        | 137.82)  | 103.50) | -0.63)  |        | 6.21)  | 4.80)  | -0.59)  |        |
|                   |   |   |   |   | 1.63    | 1.08    | -1.43   |        | 3.11     | 2.72    | -0.52   |        | 0.05   | 0.05   | -0.10   |        |
| Finland           | — | — | — | — | (0.94,  | (0.51,  | (-1.54, | <0.001 | (2.12,   | (1.75,  | (-0.82, | 0.001  | (0.00, | (0.00, | (-2.21, | 0.930  |
|                   |   |   |   |   | 2.70)   | 2.07)   | -1.33)  |        | 4.48)    | 4.09)   | -0.22)  |        | 0.63)  | 0.64)  | 2.06)   |        |
|                   |   |   |   |   | 2.36    | 1.42    | -1.78   |        | 2.07     | 1.37    | -1.46   |        | 0.03   | 0.02   | -1.37   |        |
| France            | — | — | — | — | (2.09,  | (1.20,  | (-1.90, | <0.001 | (1.81,   | (1.16,  | (-1.58, | <0.001 | (0.01, | (0.00, | (-1.37, | <0.001 |

|           |   |   |   |   |        |        |         |        |         |          |         |        |        |        |         |        |
|-----------|---|---|---|---|--------|--------|---------|--------|---------|----------|---------|--------|--------|--------|---------|--------|
|           |   |   |   |   | 2.66)  | 1.66)  | -1.66)  |        | 2.35)   | 1.62)    | -1.34)  |        | 0.09)  | 0.08)  | -1.37)  |        |
|           |   |   |   |   | 4.28)  | 4.25)  | -0.03)  |        | 87.42)  | 44.71)   | -2.34)  |        | 1.57)  | 0.80)  | -2.27)  |        |
| Gabon     | — | — | — | — | (1.61, | (2.37, | (-0.06, | 0.001  | (73.07, | (38.02,  | (-2.84, | <0.001 | (0.24, | (0.15, | (-2.62, | <0.001 |
|           |   |   |   |   | 9.29)  | 7.05)  | -0.01)  |        | 103.86) | 52.26)   | -1.83)  |        | 5.40)  | 2.45)  | -1.92)  |        |
|           |   |   |   |   | 6.89)  | 6.85)  | -0.02)  |        | 56.30)  | 82.05)   | 1.68)   |        | 0.99)  | 1.44)  | 1.70)   |        |
| Gambia    | — | — | — | — | (3.36, | (4.52, | (-0.06, | 0.403  | (45.25, | (73.60,  | (1.09,  | <0.001 | (0.07, | (0.53, | (1.13,  | <0.001 |
|           |   |   |   |   | 12.70) | 9.97)  | 0.02)   |        | 69.40)  | 91.25)   | 2.27)   |        | 4.48)  | 3.21)  | 2.27)   |        |
|           |   |   |   |   | 2.82)  | 2.58)  | -0.30)  |        | 11.11)  | 22.42)   | 2.48)   |        | 0.19)  | 0.38)  | 2.47)   |        |
| Georgia   | — | — | — | — | (1.92, | (1.52, | (-0.35, | <0.001 | (9.23,  | (18.82,  | (1.60,  | <0.001 | (0.02, | (0.06, | (1.80,  | <0.001 |
|           |   |   |   |   | 4.01)  | 4.26)  | -0.26)  |        | 13.28)  | 26.60)   | 3.38)   |        | 0.71)  | 1.46)  | 3.14)   |        |
|           |   |   |   |   | 3.19)  | 2.74)  | -0.52)  |        | 8.30)   | 4.34)    | -2.24)  |        | 0.14)  | 0.07)  | -2.45)  |        |
| Germany   | — | — | — | — | (2.91, | (2.47, | (-0.60, | <0.001 | (7.84,  | (3.99,   | (-2.41, | <0.001 | (0.09, | (0.03, | (-2.79, | <0.001 |
|           |   |   |   |   | 3.49)  | 3.04)  | -0.45)  |        | 8.78)   | 4.72)    | -2.07)  |        | 0.22)  | 0.14)  | -2.11)  |        |
|           |   |   |   |   | 3.01)  | 3.25)  | 0.28)   |        | 102.21) | 87.00)   | -0.59)  |        | 1.81)  | 1.54)  | -0.59)  |        |
| Ghana     | — | — | — | — | (2.36, | (2.83, | (0.11,  | 0.001  | (98.33, | (84.76,  | (-0.76, | <0.001 | (1.32, | (1.25, | (-0.77, | <0.001 |
|           |   |   |   |   | 3.78)  | 3.72)  | 0.44)   |        | 106.22) | 89.29)   | -0.41)  |        | 2.43)  | 1.87)  | -0.41)  |        |
|           |   |   |   |   | 2.55)  | 1.89)  | -1.02)  |        | 4.34)   | 4.10)    | -0.17)  |        | 0.07)  | 0.07)  | -0.18)  |        |
| Greece    | — | — | — | — | (1.88, | (1.29, | (-1.07, | <0.001 | (3.46,  | (3.17,   | (-0.88, | 0.652  | (0.00, | (0.00, | (-0.87, | 0.607  |
|           |   |   |   |   | 3.38)  | 2.72)  | -0.98)  |        | 5.39)   | 5.26)    | 0.56)   |        | 0.34)  | 0.43)  | 0.51)   |        |
|           |   |   |   |   | 34.09) | 24.14) | -1.18)  |        | 44.09)  | 26.73)   | -1.74)  |        | 0.76)  | 0.46)  | -1.75)  |        |
| Greenland | — | — | — | — | (9.11, | (4.05, | (-1.29, | <0.001 | (14.23, | (5.06,   | (-1.95, | <0.001 | (0.00, | (0.00, | (-2.00, | <0.001 |
|           |   |   |   |   | 97.15) | 83.25) | -1.06)  |        | 111.35) | 87.12)   | -1.54)  |        | 48.09) | 45.68) | -1.50)  |        |
|           |   |   |   |   | 5.86)  | 5.90)  | 0.01)   |        | 57.02)  | 44.03)   | -0.87)  |        | 1.01)  | 0.78)  | -0.86)  |        |
| Grenada   | — | — | — | — | (0.08, | (0.18, | (-0.05, | 0.870  | (25.07, | (18.92,  | (-1.34, | <0.001 | (0.00, | (0.00, | (-1.35, | 0.001  |
|           |   |   |   |   | 38.85) | 32.78) | 0.06)   |        | 112.37) | 87.80)   | -0.40)  |        | 30.04) | 23.65) | -0.36)  |        |
|           |   |   |   |   | 13.73) | 14.14) | 0.11)   |        | 94.21)  | 46.87)   | -2.36)  |        | 1.65)  | 0.82)  | -2.66)  |        |
| Guam      | — | — | — | — | (3.62, | (3.74, | (0.08,  | <0.001 | (61.83, | (24.84,  | (-3.01, | <0.001 | (0.00, | (0.00, | (-3.25, | <0.001 |
|           |   |   |   |   | 36.18) | 37.14) | 0.14)   |        | 137.82) | 80.70)   | -1.71)  |        | 17.06) | 15.76) | -2.07)  |        |
|           |   |   |   |   | 0.69)  | 2.11)  | 3.93)   |        | 46.22)  | 17.52)   | -3.51)  |        | 0.81)  | 0.30)  | -3.59)  |        |
| Guatemala | — | — | — | — | (0.33, | (1.67, | (3.81,  | <0.001 | (42.63, | (16.22,  | (-3.91, | <0.001 | (0.40, | (0.15, | (-4.00, | <0.001 |
|           |   |   |   |   | 1.30)  | 2.63)  | 4.05)   |        | 50.04)  | 18.90)   | -3.11)  |        | 1.47)  | 0.54)  | -3.18)  |        |
|           |   |   |   |   | 6.53)  | 7.06)  | 0.27)   |        | 96.34)  | 124.44)  | 0.94)   |        | 1.69)  | 2.18)  | 0.94)   |        |
| Guinea    | — | — | — | — | (5.06, | (5.99, | (0.23,  | <0.001 | (90.51, | (119.92, | (0.70,  | <0.001 | (1.00, | (1.61, | (0.69,  | <0.001 |

|                            |   |   |   |   |         |         |         |        |  |          |          |         |        |        |        |         |        |  |  |
|----------------------------|---|---|---|---|---------|---------|---------|--------|--|----------|----------|---------|--------|--------|--------|---------|--------|--|--|
|                            |   |   |   |   | 8.31)   | 8.27)   | 0.30)   |        |  | 102.47)  | 129.09)  | 1.18)   |        | 2.70)  | 2.89)  | 1.19)   |        |  |  |
|                            |   |   |   |   | 5.06    | 5.41    | 0.24    |        |  | 147.47   | 164.23   | 0.40    |        | 2.62   | 2.91   | 0.39    |        |  |  |
| Guinea-Bissau              | — | — | — | — | (2.23,  | (3.28,  | (0.20,  | <0.001 |  | (129.86, | (151.48, | (0.19,  | <0.001 | (0.78, | (1.44, | (0.19,  | <0.001 |  |  |
|                            |   |   |   |   | 9.91)   | 8.44)   | 0.27)   |        |  | 166.88)  | 177.81)  | 0.60)   |        | 6.55)  | 5.30)  | 0.58)   |        |  |  |
|                            |   |   |   |   | 8.14    | 8.26    | 0.04    |        |  | 139.41   | 153.69   | 0.32    |        | 2.47   | 2.73   | 0.33    |        |  |  |
| Guyana                     | — | — | — | — | (4.16,  | (4.28,  | (0.01,  | 0.018  |  | (121.06, | (134.37, | (-0.81, | 0.577  | (0.61, | (0.75, | (-0.82, | 0.577  |  |  |
|                            |   |   |   |   | 14.42)  | 14.46)  | 0.08)   |        |  | 159.86)  | 175.05)  | 1.47)   |        | 6.78)  | 7.06)  | 1.49)   |        |  |  |
|                            |   |   |   |   | 3.22    | 3.52    | 0.31    |        |  | 162.08   | 110.01   | -1.23   |        | 2.89   | 1.95   | -1.35   |        |  |  |
| Haiti                      | — | — | — | — | (2.26,  | (2.85,  | (0.28,  | <0.001 |  | (154.82, | (106.12, | (-1.64, | <0.001 | (1.99, | (1.47, | (-1.70, | <0.001 |  |  |
|                            |   |   |   |   | 4.46)   | 4.30)   | 0.33)   |        |  | 169.59)  | 114.02)  | -0.83)  |        | 4.06)  | 2.56)  | -0.99)  |        |  |  |
|                            |   |   |   |   | 1.37    | 3.01    | 2.78    |        |  | 73.58    | 31.04    | -2.86   |        | 1.28   | 0.54   | -2.85   |        |  |  |
| Honduras                   | — | — | — | — | (0.69,  | (2.30,  | (2.66,  | <0.001 |  | (67.66,  | (28.65,  | (-3.31, | <0.001 | (0.60, | (0.27, | (-3.31, | <0.001 |  |  |
|                            |   |   |   |   | 2.47)   | 3.87)   | 2.90)   |        |  | 79.90)   | 33.59)   | -2.42)  |        | 2.40)  | 0.99)  | -2.38)  |        |  |  |
|                            |   |   |   |   | 2.42    | 1.84    | -0.93   |        |  | 18.25    | 10.90    | -1.65   |        | 0.33   | 0.19   | -1.71   |        |  |  |
| Hungary                    | — | — | — | — | (1.79,  | (1.24,  | (-1.00, | <0.001 |  | (16.45,  | (9.34,   | (-2.35, | <0.001 | (0.13, | (0.04, | (-2.62, | <0.001 |  |  |
|                            |   |   |   |   | 3.21)   | 2.67)   | -0.85)  |        |  | 20.22)   | 12.67)   | -0.95)  |        | 0.72)  | 0.63)  | -0.79)  |        |  |  |
|                            |   |   |   |   | 1.77    | 1.31    | -1.05   |        |  | 1.72     | 1.36     | -0.81   |        | 0.03   | 0.02   | -1.36   |        |  |  |
| Iceland                    | — | — | — | — | (0.03,  | (0.02,  | (-1.14, | <0.001 |  | (0.03,   | (0.02,   | (-1.02, | <0.001 | (0.00, | (0.00, | (-1.36, | <0.001 |  |  |
|                            |   |   |   |   | 11.07)  | 9.80)   | -0.95)  |        |  | 11.00)   | 9.90)    | -0.61)  |        | 7.92)  | 7.61)  | -1.36)  |        |  |  |
|                            |   |   |   |   | 1.64    | 1.68    | 0.07    |        |  | 32.28    | 19.01    | -1.88   |        | 0.57   | 0.33   | -1.94   |        |  |  |
| India                      | — | — | — | — | (1.58,  | (1.64,  | (-0.02, | 0.125  |  | (31.99,  | (18.85,  | (-2.53, | <0.001 | (0.53, | (0.31, | (-2.60, | <0.001 |  |  |
|                            |   |   |   |   | 1.71)   | 1.73)   | 0.15)   |        |  | 32.57)   | 19.17)   | -1.23)  |        | 0.60)  | 0.36)  | -1.27)  |        |  |  |
|                            |   |   |   |   | 10.19   | 10.63   | 0.14    |        |  | 77.44    | 40.83    | -2.15   |        | 1.37   | 0.72   | -2.20   |        |  |  |
| Indonesia                  | — | — | — | — | (9.85,  | (10.36, | (0.12,  | <0.001 |  | (76.51,  | (40.29,  | (-2.24, | <0.001 | (1.25, | (0.65, | (-2.37, | <0.001 |  |  |
|                            |   |   |   |   | 10.54)  | 10.91)  | 0.16)   |        |  | 78.37)   | 41.37)   | -2.07)  |        | 1.50)  | 0.79)  | -2.04)  |        |  |  |
|                            |   |   |   |   | 20.27   | 20.31   | -0.01   |        |  | 48.41    | 32.75    | -1.33   |        | 0.81   | 0.53   | -1.47   |        |  |  |
| Iran (Islamic Republic of) | — | — | — | — | (19.34, | (19.71, | (-0.11, | 0.819  |  | (47.02,  | (31.93,  | (-1.56, | <0.001 | (0.64, | (0.43, | (-1.64, | <0.001 |  |  |
|                            |   |   |   |   | 21.24)  | 20.93)  | 0.09)   |        |  | 49.83)   | 33.59)   | -1.11)  |        | 1.02)  | 0.65)  | -1.29)  |        |  |  |
|                            |   |   |   |   | 10.39   | 10.74   | 0.11    |        |  | 41.46    | 23.62    | -1.98   |        | 0.71   | 0.40   | -2.02   |        |  |  |
| Iraq                       | — | — | — | — | (9.18,  | (10.03, | (0.09,  | <0.001 |  | (39.07,  | (22.57,  | (-2.36, | <0.001 | (0.43, | (0.27, | (-2.51, | <0.001 |  |  |
|                            |   |   |   |   | 11.72)  | 11.50)  | 0.13)   |        |  | 43.97)   | 24.71)   | -1.61)  |        | 1.12)  | 0.57)  | -1.52)  |        |  |  |
|                            |   |   |   |   | 1.05    | 0.73    | -1.26   |        |  | 1.47     | 0.84     | -1.90   |        | 0.02   | 0.01   | -2.24   |        |  |  |
| Ireland                    | — | — | — | — | (0.42,  | (0.28,  | (-1.33, | <0.001 |  | (0.70,   | (0.34,   | (-2.38, | <0.001 | (0.00, | (0.00, | (-2.24, | <0.001 |  |  |

|              |   |   |   |   |         |         |         |        |         |         |         |        |        |        |         |        |
|--------------|---|---|---|---|---------|---------|---------|--------|---------|---------|---------|--------|--------|--------|---------|--------|
|              |   |   |   |   | 2.17)   | 1.61)   | -1.18)  |        | 2.72)   | 1.77)   | -1.42)  |        | 0.62)  | 0.56)  | -2.24)  |        |
|              |   |   |   |   | 1.30    | 0.94    | -1.13   |        | 5.25    | 1.06    | -5.34   |        | 0.09   | 0.02   | -5.15   |        |
| Israel       | — | — | — | — | (0.68,  | (0.53,  | (-1.26, | <0.001 | (3.90,  | (0.62,  | (-5.82, | <0.001 | (0.00, | (0.00, | (-5.84, | <0.001 |
|              |   |   |   |   | 2.27)   | 1.55)   | -0.99)  |        | 6.93)   | 1.70)   | -4.85)  |        | 0.58)  | 0.27)  | -4.45)  |        |
|              |   |   |   |   | 3.35    | 2.47    | -1.10   |        | 3.44    | 2.59    | -1.00   |        | 0.06   | 0.04   | -1.37   |        |
| Italy        | — | — | — | — | (3.01,  | (2.15,  | (-1.27, | <0.001 | (3.10,  | (2.26,  | (-1.23, | <0.001 | (0.02, | (0.01, | (-1.37, | <0.001 |
|              |   |   |   |   | 3.71)   | 2.82)   | -0.92)  |        | 3.82)   | 2.96)   | -0.77)  |        | 0.12)  | 0.12)  | -1.37)  |        |
|              |   |   |   |   | 8.01    | 8.37    | 0.15    |        | 62.85   | 47.83   | -1.03   |        | 1.11   | 0.84   | -1.06   |        |
| Jamaica      | — | — | — | — | (5.51,  | (6.20,  | (0.13,  | <0.001 | (55.50, | (42.42, | (-3.17, | 0.350  | (0.34, | (0.27, | (-3.27, | 0.358  |
|              |   |   |   |   | 11.30)  | 11.06)  | 0.17)   |        | 70.95)  | 53.74)  | 1.15)   |        | 2.75)  | 2.00)  | 1.21)   |        |
|              |   |   |   |   | 5.66    | 4.41    | -0.86   |        | 4.93    | 1.94    | -3.17   |        | 0.08   | 0.03   | -3.23   |        |
| Japan        | — | — | — | — | (5.35,  | (4.11,  | (-0.95, | <0.001 | (4.65,  | (1.74,  | (-3.44, | <0.001 | (0.05, | (0.01, | (-4.93, | <0.001 |
|              |   |   |   |   | 5.97)   | 4.72)   | -0.77)  |        | 5.23)   | 2.15)   | -2.91)  |        | 0.12)  | 0.07)  | -1.50)  |        |
|              |   |   |   |   | 21.13   | 21.80   | 0.10    |        | 37.74   | 16.30   | -2.91   |        | 0.64   | 0.26   | -3.02   |        |
| Jordan       | — | — | — | — | (17.29, | (19.85, | (0.06,  | <0.001 | (32.70, | (14.63, | (-3.55, | <0.001 | (0.15, | (0.09, | (-3.65, | <0.001 |
|              |   |   |   |   | 25.59)  | 23.90)  | 0.14)   |        | 43.38)  | 18.11)  | -2.26)  |        | 1.84)  | 0.58)  | -2.38)  |        |
|              |   |   |   |   | 1.29    | 1.21    | -0.22   |        | 23.10   | 17.32   | -0.91   |        | 0.41   | 0.31   | -0.99   |        |
| Kazakhstan   | — | — | — | — | (0.93,  | (0.89,  | (-0.31, | <0.001 | (21.50, | (16.01, | (-1.55, | 0.005  | (0.22, | (0.16, | (-2.04, | 0.067  |
|              |   |   |   |   | 1.73)   | 1.63)   | -0.14)  |        | 24.78)  | 18.73)  | -0.27)  |        | 0.69)  | 0.56)  | 0.07)   |        |
|              |   |   |   |   | 6.29    | 5.99    | -0.17   |        | 64.37   | 50.00   | -0.88   |        | 1.14   | 0.88   | -0.89   |        |
| Kenya        | — | — | — | — | (5.45,  | (5.50,  | (-0.21, | <0.001 | (61.67, | (48.59, | (-1.03, | <0.001 | (0.80, | (0.70, | (-1.09, | <0.001 |
|              |   |   |   |   | 7.23)   | 6.51)   | -0.14)  |        | 67.15)  | 51.44)  | -0.74)  |        | 1.57)  | 1.10)  | -0.68)  |        |
|              |   |   |   |   | 4.01    | 4.17    | 0.14    |        | 111.31  | 87.40   | -0.84   |        | 1.99   | 1.56   | -0.85   |        |
| Kiribati     | — | — | — | — | (0.01,  | (0.10,  | (0.11,  | <0.001 | (62.98, | (54.04, | (-0.94, | <0.001 | (0.00, | (0.00, | (-0.98, | <0.001 |
|              |   |   |   |   | 37.01)  | 23.84)  | 0.17)   |        | 183.40) | 134.00) | -0.74)  |        | 33.28) | 19.15) | -0.72)  |        |
|              |   |   |   |   | 31.77   | 32.79   | 0.10    |        | 64.85   | 26.41   | -2.83   |        | 1.07   | 0.41   | -3.03   |        |
| Kuwait       | — | — | — | — | (26.14, | (29.74, | (0.06,  | <0.001 | (56.70, | (23.44, | (-3.80, | <0.001 | (0.28, | (0.12, | (-4.16, | <0.001 |
|              |   |   |   |   | 38.29)  | 36.20)  | 0.13)   |        | 73.88)  | 29.78)  | -1.85)  |        | 2.91)  | 1.24)  | -1.88)  |        |
|              |   |   |   |   | 1.09    | 1.01    | -0.26   |        | 14.31   | 11.13   | -0.85   |        | 0.25   | 0.19   | -0.89   |        |
| Kyrgyzstan   | — | — | — | — | (0.49,  | (0.54,  | (-0.27, | <0.001 | (11.87, | (9.38,  | (-1.44, | 0.005  | (0.03, | (0.03, | (-1.64, | 0.022  |
|              |   |   |   |   | 2.10)   | 1.74)   | -0.26)  |        | 17.12)  | 13.11)  | -0.25)  |        | 0.92)  | 0.64)  | -0.13)  |        |
| Lao People's |   |   |   |   | 3.61    | 3.94    | 0.30    |        | 59.23   | 46.50   | -0.82   |        | 1.06   | 0.83   | -0.81   |        |
| Democratic   | — | — | — | — | (2.30,  | (2.98,  | (0.27,  | <0.001 | (53.56, | (43.07, | (-1.05, | <0.001 | (0.43, | (0.43, | (-1.05, | <0.001 |

|            |   |   |   |   |         |         |         |        |          |          |         |        |        |        |         |        |
|------------|---|---|---|---|---------|---------|---------|--------|----------|----------|---------|--------|--------|--------|---------|--------|
| Republic   |   |   |   |   | 5.41)   | 5.11)   | 0.33)   |        | 65.37)   | 50.13)   | -0.60)  |        | 2.21)  | 1.45)  | -0.57)  |        |
|            |   |   |   |   | 0.18    | 0.18    | 0.04    |        | 1.17     | 3.21     | 3.34    |        | 0.02   | 0.06   | 3.52    |        |
| Latvia     | — | — | — | — | (0.00,  | (0.00,  | (-0.27, | 0.821  | (0.42,   | (1.58,   | (2.62,  | <0.001 | (0.00, | (0.00, | (1.64,  | <0.001 |
|            |   |   |   |   | 1.21)   | 2.14)   | 0.35)   |        | 2.67)    | 6.20)    | 4.07)   |        | 0.95)  | 1.96)  | 5.44)   |        |
|            |   |   |   |   | 18.01   | 19.65   | 0.28    |        | 57.49    | 28.69    | -2.40   |        | 0.99   | 0.47   | -2.56   |        |
| Lebanon    | — | — | — | — | (14.63, | (17.20, | (0.24,  | <0.001 | (51.38,  | (25.58,  | (-2.54, | <0.001 | (0.34, | (0.16, | (-2.73, | <0.001 |
|            |   |   |   |   | 21.95)  | 22.42)  | 0.33)   |        | 64.14)   | 32.12)   | -2.26)  |        | 2.24)  | 1.18)  | -2.39)  |        |
|            |   |   |   |   | 1.71    | 1.62    | -0.18   |        | 53.84    | 84.28    | 1.45    |        | 0.97   | 1.52   | 1.46    |        |
| Lesotho    | — | — | — | — | (0.54,  | (0.64,  | (-0.25, | <0.001 | (45.64,  | (75.81,  | (0.97,  | <0.001 | (0.18, | (0.58, | (0.95,  | <0.001 |
|            |   |   |   |   | 4.15)   | 3.38)   | -0.11)  |        | 63.14)   | 93.46)   | 1.94)   |        | 3.07)  | 3.24)  | 1.97)   |        |
|            |   |   |   |   | 5.89    | 6.25    | 0.21    |        | 83.06    | 94.56    | 0.43    |        | 1.45   | 1.65   | 0.43    |        |
| Liberia    | — | — | — | — | (3.56,  | (4.72,  | (0.19,  | <0.001 | (73.63,  | (88.40,  | (0.07,  | 0.019  | (0.46, | (0.92, | (0.05,  | 0.028  |
|            |   |   |   |   | 9.18)   | 8.14)   | 0.22)   |        | 93.38)   | 101.04)  | 0.79)   |        | 3.45)  | 2.73)  | 0.81)   |        |
|            |   |   |   |   | 16.94   | 18.35   | 0.25    |        | 64.33    | 50.77    | -0.71   |        | 1.09   | 0.85   | -0.74   |        |
| Libya      | — | — | — | — | (13.68, | (16.30, | (0.13,  | <0.001 | (58.10,  | (47.24,  | (-1.43, | 0.055  | (0.42, | (0.45, | (-1.52, | 0.065  |
|            |   |   |   |   | 20.76)  | 20.62)  | 0.38)   |        | 71.10)   | 54.49)   | 0.01)   |        | 2.38)  | 1.47)  | 0.05)   |        |
|            |   |   |   |   | 0.56    | 0.53    | -0.23   |        | 4.24     | 8.22     | 2.54    |        | 0.08   | 0.15   | 2.21    |        |
| Lithuania  | — | — | — | — | (0.15,  | (0.08,  | (-0.35, | <0.001 | (2.86,   | (5.79,   | (1.30,  | <0.001 | (0.00, | (0.00, | (0.49,  | 0.011  |
|            |   |   |   |   | 1.48)   | 2.00)   | -0.11)  |        | 6.09)    | 11.49)   | 3.79)   |        | 0.74)  | 1.44)  | 3.95)   |        |
|            |   |   |   |   | 2.51    | 1.80    | -1.14   |        | 2.62     | 1.96     | -0.98   |        | 0.04   | 0.03   | -0.96   |        |
| Luxembourg | — | — | — | — | (0.31,  | (0.25,  | (-1.19, | <0.001 | (0.32,   | (0.28,   | (-1.31, | <0.001 | (0.00, | (0.00, | (-0.96, | <0.001 |
|            |   |   |   |   | 11.15)  | 7.58)   | -1.09)  |        | 11.39)   | 7.89)    | -0.66)  |        | 7.58)  | 5.00)  | -0.96)  |        |
|            |   |   |   |   | 7.31    | 7.32    | 0.01    |        | 395.91   | 223.41   | -1.96   |        | 7.01   | 3.97   | -1.95   |        |
| Madagascar | — | — | — | — | (6.12,  | (6.55,  | (-0.01, | 0.356  | (387.01, | (219.18, | (-2.52, | <0.001 | (5.86, | (3.42, | (-2.53, | <0.001 |
|            |   |   |   |   | 8.68)   | 8.15)   | 0.03)   |        | 404.98)  | 227.71)  | -1.39)  |        | 8.33)  | 4.59)  | -1.37)  |        |
|            |   |   |   |   | 5.96    | 5.88    | -0.04   |        | 114.13   | 50.88    | -2.69   |        | 2.02   | 0.90   | -2.71   |        |
| Malawi     | — | — | — | — | (4.76,  | (5.06,  | (-0.08, | 0.114  | (108.80, | (48.47,  | (-2.88, | <0.001 | (1.36, | (0.60, | (-2.91, | <0.001 |
|            |   |   |   |   | 7.37)   | 6.79)   | 0.01)   |        | 119.66)  | 53.38)   | -2.51)  |        | 2.90)  | 1.29)  | -2.51)  |        |
|            |   |   |   |   | 2.72    | 2.79    | 0.08    |        | 10.28    | 4.32     | -3.00   |        | 0.18   | 0.07   | -3.10   |        |
| Malaysia   | — | — | — | — | (2.19,  | (2.40,  | (0.04,  | 0.001  | (9.23,   | (3.83,   | (-3.47, | <0.001 | (0.07, | (0.02, | (-3.54, | <0.001 |
|            |   |   |   |   | 3.34)   | 3.23)   | 0.13)   |        | 11.41)   | 4.86)    | -2.54)  |        | 0.39)  | 0.18)  | -2.65)  |        |
|            |   |   |   |   | 3.46    | 3.58    | 0.11    |        | 27.04    | 6.31     | -4.88   |        | 0.48   | 0.11   | -4.87   |        |
| Maldives   | — | — | — | — | (0.08,  | (0.90,  | (0.06,  | <0.001 | (11.68,  | (2.37,   | (-5.16, | <0.001 | (0.00, | (0.00, | (-5.20, | <0.001 |



|                                        |   |   |   |   |         |         |         |        |          |          |         |        |         |        |         |        |
|----------------------------------------|---|---|---|---|---------|---------|---------|--------|----------|----------|---------|--------|---------|--------|---------|--------|
|                                        |   |   |   |   | 21.52)  | 10.94)  | 0.15)   |        | 54.77)   | 14.71)   | -4.60)  |        | 16.34)  | 5.96)  | -4.55)  |        |
|                                        |   |   |   |   | 5.36    | 5.61    | 0.16    |        | 160.39   | 142.81   | -0.37   |        | 2.84    | 2.51   | -0.39   |        |
| Mali                                   | — | — | — | — | (4.19,  | (4.83,  | (0.12,  | <0.001 | (153.78, | (138.87, | (-0.61, | 0.002  | (2.02,  | (2.01, | (-0.64, | 0.002  |
|                                        |   |   |   |   | 6.76)   | 6.49)   | 0.19)   |        | 167.22)  | 146.85)  | -0.13)  |        | 3.90)   | 3.11)  | -0.14)  |        |
|                                        |   |   |   |   | 2.78    | 1.86    | -1.39   |        | 3.23     | 3.38     | 0.23    |        | 0.05    | 0.06   | 0.53    |        |
| Malta                                  | — | — | — | — | (0.35,  | (0.12,  | (-1.49, | <0.001 | (0.48,   | (0.53,   | (-0.03, | 0.087  | (0.00,  | (0.00, | (-0.70, | 0.399  |
|                                        |   |   |   |   | 10.92)  | 10.68)  | -1.30)  |        | 11.68)   | 13.01)   | 0.49)   |        | 6.59)   | 8.06)  | 1.77)   |        |
|                                        |   |   |   |   | 6.81    | 6.89    | 0.03    |        | 118.30   | 144.54   | 0.69    |        | 2.13    | 2.59   | 0.67    |        |
| Marshall Islands                       | — | — | — | — | (0.00,  | (0.07,  | (0.00,  | 0.022  | (52.16,  | (83.40,  | (0.64,  | <0.001 | (0.00,  | (0.00, | (0.61,  | <0.001 |
|                                        |   |   |   |   | 69.73)  | 46.43)  | 0.05)   |        | 232.14)  | 233.53)  | 0.75)   |        | 61.00)  | 38.58) | 0.74)   |        |
|                                        |   |   |   |   | 6.93    | 7.23    | 0.15    |        | 80.86    | 57.19    | -1.16   |        | 1.42    | 1.00   | -1.18   |        |
| Mauritania                             | — | — | — | — | (4.38,  | (5.36,  | (0.13,  | <0.001 | (71.66,  | (51.81,  | (-1.35, | <0.001 | (0.45,  | (0.40, | (-1.66, | <0.001 |
|                                        |   |   |   |   | 10.43)  | 9.56)   | 0.17)   |        | 90.96)   | 63.01)   | -0.98)  |        | 3.42)   | 2.08)  | -0.70)  |        |
|                                        |   |   |   |   | 10.41   | 9.90    | -0.17   |        | 52.17    | 42.49    | -0.81   |        | 0.91    | 0.74   | -0.81   |        |
| Mauritius                              | — | — | — | — | (6.74,  | (6.36,  | (-0.23, | <0.001 | (43.47,  | (34.68,  | (-1.29, | 0.001  | (0.13,  | (0.08, | (-1.31, | 0.001  |
|                                        |   |   |   |   | 15.38)  | 14.80)  | -0.11)  |        | 62.13)   | 51.61)   | -0.33)  |        | 3.18)   | 3.00)  | -0.31)  |        |
|                                        |   |   |   |   | 2.17    | 2.49    | 0.48    |        | 12.42    | 7.07     | -1.87   |        | 0.22    | 0.12   | -1.97   |        |
| Mexico                                 | — | — | — | — | (1.95,  | (2.30,  | (0.34,  | <0.001 | (11.88,  | (6.75,   | (-2.04, | <0.001 | (0.15,  | (0.08, | (-2.19, | <0.001 |
|                                        |   |   |   |   | 2.42)   | 2.69)   | 0.62)   |        | 12.99)   | 7.40)    | -1.71)  |        | 0.30)   | 0.17)  | -1.75)  |        |
|                                        |   |   |   |   | 7.32    | 7.31    | -0.01   |        | 134.01   | 122.87   | -0.31   |        | 2.41    | 2.18   | -0.36   |        |
| Micronesia<br>(Federated States<br>of) | — | — | — | — | (0.31,  | (0.38,  | (-0.03, | 0.606  | (84.18,  | (77.20,  | (-0.42, | <0.001 | (0.00,  | (0.00, | (-0.49, | <0.001 |
|                                        |   |   |   |   | 37.57)  | 34.98)  | 0.02)   |        | 203.41)  | 186.21)  | -0.21)  |        | 29.03)  | 25.99) | -0.22)  |        |
|                                        |   |   |   |   | 1.66    | 1.16    | -1.24   |        | 2.22     | 2.58     | 0.55    |        | 0.04    | 0.04   | -0.15   |        |
| Monaco                                 | — | — | — | — | (0.00,  | (0.00,  | (-1.32, | <0.001 | (0.00,   | (0.00,   | (0.42,  | <0.001 | (0.00,  | (0.00, | (-0.15, | <0.001 |
|                                        |   |   |   |   | 128.25) | 93.16)  | -1.15)  |        | 129.18)  | 95.75)   | 0.67)   |        | 125.97) | 91.21) | -0.15)  |        |
|                                        |   |   |   |   | 0.77    | 0.75    | -0.08   |        | 28.29    | 7.75     | -4.34   |        | 0.52    | 0.14   | -4.50   |        |
| Mongolia                               | — | — | — | — | (0.13,  | (0.27,  | (-0.21, | 0.222  | (22.78,  | (5.89,   | (-5.05, | <0.001 | (0.05,  | (0.00, | (-5.17, | <0.001 |
|                                        |   |   |   |   | 2.57)   | 1.82)   | 0.05)   |        | 34.78)   | 10.11)   | -3.62)  |        | 2.19)   | 0.97)  | -3.83)  |        |
|                                        |   |   |   |   | 0.70    | 0.55    | -0.85   |        | 2.58     | 2.36     | -0.18   |        | 0.04    | 0.04   | 0.28    |        |
| Montenegro                             | — | — | — | — | (0.01,  | (0.00,  | (-0.97, | <0.001 | (0.56,   | (0.41,   | (-1.03, | 0.687  | (0.00,  | (0.00, | (-0.90, | 0.645  |
|                                        |   |   |   |   | 4.44)   | 5.06)   | -0.72)  |        | 7.43)    | 7.91)    | 0.69)   |        | 3.23)   | 4.20)  | 1.47)   |        |
|                                        |   |   |   |   | 14.43   | 15.23   | 0.18    |        | 68.74    | 41.65    | -1.66   |        | 1.18    | 0.71   | -1.74   |        |
| Morocco                                | — | — | — | — | (13.34, | (14.36, | (0.17,  | <0.001 | (66.38,  | (40.19,  | (-1.94, | <0.001 | (0.89,  | (0.53, | (-2.00, | <0.001 |

|             |   |   |   |   |         |         |         |        |         |         |         |        |         |         |         |        |
|-------------|---|---|---|---|---------|---------|---------|--------|---------|---------|---------|--------|---------|---------|---------|--------|
|             |   |   |   |   | 15.59)  | 16.15)  | 0.20)   |        | 71.16)  | 43.15)  | -1.39)  |        | 1.54)   | 0.93)   | -1.47)  |        |
|             |   |   |   |   | 5.33    | 5.73    | 0.25    |        | 88.16   | 61.36   | -1.25   |        | 1.57    | 1.09    | -1.26   |        |
| Mozambique  | — | — | — | — | (4.40,  | (5.06,  | (0.21,  | <0.001 | (84.28, | (59.16, | (-1.55, | <0.001 | (1.09,  | (0.81,  | (-1.53, | <0.001 |
|             |   |   |   |   | 6.40)   | 6.47)   | 0.30)   |        | 92.16)  | 63.63)  | -0.96)  |        | 2.19)   | 1.43)   | -1.00)  |        |
|             |   |   |   |   | 5.76    | 5.99    | 0.13    |        | 101.58  | 39.52   | -3.21   |        | 1.79    | 0.69    | -3.21   |        |
| Myanmar     | — | — | — | — | (5.23,  | (5.55,  | (0.10,  | <0.001 | (99.34, | (38.38, | (-3.49, | <0.001 | (1.50,  | (0.55,  | (-3.51, | <0.001 |
|             |   |   |   |   | 6.34)   | 6.46)   | 0.16)   |        | 103.86) | 40.69)  | -2.93)  |        | 2.12)   | 0.86)   | -2.92)  |        |
|             |   |   |   |   | 2.23    | 2.24    | 0.02    |        | 68.55   | 38.83   | -1.89   |        | 1.24    | 0.70    | -1.92   |        |
| Namibia     | — | — | — | — | (0.72,  | (1.10,  | (-0.02, | 0.326  | (58.13, | (33.44, | (-2.35, | <0.001 | (0.23,  | (0.16,  | (-2.37, | <0.001 |
|             |   |   |   |   | 5.33)   | 4.08)   | 0.05)   |        | 80.36)  | 44.85)  | -1.42)  |        | 3.90)   | 1.98)   | -1.48)  |        |
|             |   |   |   |   | 7.43    | 7.41    | -0.01   |        | 132.49  | 125.21  | -0.22   |        | 2.37    | 2.23    | -0.23   |        |
| Nauru       | — | — | — | — | (0.00,  | (0.00,  | (-0.02, | 0.117  | (21.78, | (22.19, | (-0.44, | 0.059  | (0.00,  | (0.00,  | (-0.49, | 0.088  |
|             |   |   |   |   | 222.06) | 200.64) | 0.00)   |        | 432.48) | 397.03) | 0.01)   |        | 211.97) | 190.35) | 0.03)   |        |
|             |   |   |   |   | 0.98    | 1.06    | 0.26    |        | 29.09   | 13.31   | -2.65   |        | 0.52    | 0.24    | -2.68   |        |
| Nepal       | — | — | — | — | (0.67,  | (0.82,  | (0.20,  | <0.001 | (27.27, | (12.43, | (-2.85, | <0.001 | (0.30,  | (0.13,  | (-2.93, | <0.001 |
|             |   |   |   |   | 1.39)   | 1.34)   | 0.32)   |        | 31.01)  | 14.23)  | -2.44)  |        | 0.84)   | 0.39)   | -2.42)  |        |
|             |   |   |   |   | 1.01    | 0.76    | -1.00   |        | 1.34    | 1.12    | -0.58   |        | 0.02    | 0.02    | 0.00    |        |
| Netherlands | — | — | — | — | (0.69,  | (0.47,  | (-1.10, | <0.001 | (0.96,  | (0.76,  | (-1.02, | 0.011  | (0.00,  | (0.00,  | (0.00,  | <0.001 |
|             |   |   |   |   | 1.44)   | 1.17)   | -0.89)  |        | 1.84)   | 1.61)   | -0.13)  |        | 0.19)   | 0.19)   | 0.00)*  |        |
|             |   |   |   |   | 2.15    | 1.49    | -1.25   |        | 4.47    | 2.47    | -2.06   |        | 0.08    | 0.04    | -2.35   |        |
| New Zealand | — | — | — | — | (1.20,  | (0.75,  | (-1.34, | <0.001 | (3.05,  | (1.48,  | (-2.43, | <0.001 | (0.00,  | (0.00,  | (-3.78, | 0.002  |
|             |   |   |   |   | 3.55)   | 2.67)   | -1.16)  |        | 6.35)   | 3.91)   | -1.67)  |        | 0.70)   | 0.64)   | -0.89)  |        |
|             |   |   |   |   | 2.12    | 4.01    | 2.22    |        | 22.81   | 11.20   | -2.48   |        | 0.40    | 0.19    | -2.68   |        |
| Nicaragua   | — | — | — | — | (1.15,  | (3.02,  | (2.17,  | <0.001 | (19.24, | (9.49,  | (-3.19, | <0.001 | (0.07,  | (0.03,  | (-3.54, | <0.001 |
|             |   |   |   |   | 3.63)   | 5.24)   | 2.26)   |        | 26.88)  | 13.13)  | -1.77)  |        | 1.34)   | 0.61)   | -1.82)  |        |
|             |   |   |   |   | 5.57    | 6.00    | 0.25    |        | 79.30   | 76.22   | -0.12   |        | 1.39    | 1.34    | -0.12   |        |
| Niger       | — | — | — | — | (4.27,  | (5.15,  | (0.23,  | <0.001 | (74.29, | (73.23, | (-0.32, | 0.220  | (0.80,  | (0.96,  | (-0.31, | 0.220  |
|             |   |   |   |   | 7.16)   | 6.95)   | 0.27)   |        | 84.57)  | 79.30)  | 0.07)   |        | 2.29)   | 1.81)   | 0.07)   |        |
|             |   |   |   |   | 8.32    | 8.59    | 0.11    |        | 79.01   | 58.02   | -1.05   |        | 1.39    | 1.01    | -1.09   |        |
| Nigeria     | — | — | — | — | (7.83,  | (8.28,  | (0.09,  | <0.001 | (77.52, | (57.24, | (-1.24, | <0.001 | (1.20,  | (0.91,  | (-1.33, | <0.001 |
|             |   |   |   |   | 8.83)   | 8.90)   | 0.14)   |        | 80.52)  | 58.80)  | -0.86)  |        | 1.61)   | 1.12)   | -0.84)  |        |
|             |   |   |   |   | 10.21   | 10.42   | 0.08    |        | 67.68   | 51.50   | -0.96   |        | 1.20    | 0.90    | -0.97   |        |
| Niue        | — | — | — | — | (0.00,  | (0.00,  | (0.00,  | 0.041  | (0.00,  | (0.00,  | (-1.19, | <0.001 | (0.00,  | (0.00,  | (-1.26, | <0.001 |

|                          |   |   |   |          |          |         |        |          |          |         |        |         |         |         |        |
|--------------------------|---|---|---|----------|----------|---------|--------|----------|----------|---------|--------|---------|---------|---------|--------|
|                          |   |   |   | 1060.96) | 1482.07) | 0.15)   |        | 1175.79) | 1562.18) | -0.72)  |        | 1042.26 | 1463.27 | -0.67)  |        |
|                          |   |   |   |          |          |         |        |          |          |         |        | )       | )       |         |        |
|                          |   |   |   | 2.14     | 1.76     | -0.67   |        | 16.94    | 9.22     | -1.97   |        | 0.30    | 0.16    | -2.04   |        |
| North Macedonia          | — | — | — | (0.96,   | (0.74,   | (-0.80, | <0.001 | (13.16,  | (6.49,   | (-2.96, | <0.001 | (0.01,  | (0.00,  | (-3.01, | <0.001 |
|                          |   |   |   | 4.14)    | 3.81)    | -0.54)  |        | 21.49)   | 12.88)   | -0.98)  |        | 1.50)   | 1.62)   | -1.06)  |        |
|                          |   |   |   | 6.24     | 6.38     | 0.08    |        | 42.46    | 16.34    | -3.63   |        | 0.76    | 0.28    | -3.79   |        |
| Northern Mariana Islands | — | — | — | (0.04,   | (0.00,   | (0.01,  | 0.032  | (13.48,  | (0.10,   | (-4.23, | <0.001 | (0.00,  | (0.00,  | (-4.34, | <0.001 |
|                          |   |   |   | 48.18)   | 110.70)  | 0.15)   |        | 102.88)  | 128.04)  | -3.03)  |        | 38.45)  | 99.21)  | -3.25)  |        |
|                          |   |   |   | 1.29     | 1.87     | 1.21    |        | 1.84     | 0.91     | -2.38   |        | 0.03    | 0.01    | -3.96   |        |
| Norway                   | — | — | — | (0.63,   | (1.09,   | (1.02,  | <0.001 | (1.03,   | (0.39,   | (-2.61, | <0.001 | (0.00,  | (0.00,  | (-7.09, | 0.017  |
|                          |   |   |   | 2.37)    | 3.03)    | 1.39)   |        | 3.08)    | 1.84)    | -2.16)  |        | 0.58)   | 0.54)   | -0.73)  |        |
|                          |   |   |   | 12.07    | 19.31    | 1.63    |        | 68.27    | 39.11    | -1.63   |        | 1.17    | 0.64    | -1.79   |        |
| Oman                     | — | — | — | (8.18,   | (16.49,  | (1.49,  | <0.001 | (58.71,  | (34.89,  | (-2.41, | <0.001 | (0.25,  | (0.21,  | (-2.56, | <0.001 |
|                          |   |   |   | 17.22)   | 22.54)   | 1.77)   |        | 79.01)   | 43.76)   | -0.84)  |        | 3.48)   | 1.58)   | -1.02)  |        |
|                          |   |   |   | 1.68     | 1.76     | 0.17    |        | 38.42    | 40.62    | 0.20    |        | 0.69    | 0.72    | 0.16    |        |
| Pakistan                 | — | — | — | (1.48,   | (1.63,   | (0.09,  | <0.001 | (37.46,  | (39.99,  | (0.04,  | 0.013  | (0.56,  | (0.64,  | (-0.07, | 0.171  |
|                          |   |   |   | 1.90)    | 1.90)    | 0.24)   |        | 39.40)   | 41.25)   | 0.36)   |        | 0.83)   | 0.81)   | 0.39)   |        |
|                          |   |   |   | 3.05     | 3.04     | -0.01   |        | 15.95    | 12.02    | -0.95   |        | 0.28    | 0.21    | -1.03   |        |
| Palau                    | — | — | — | (0.00,   | (0.00,   | (-0.06, | 0.789  | (0.02,   | (0.00,   | (-1.09, | <0.001 | (0.00,  | (0.00,  | (-1.22, | <0.001 |
|                          |   |   |   | 126.96)  | 175.59)  | 0.05)   |        | 151.37)  | 191.42)  | -0.81)  |        | 121.38) | 170.59) | -0.85)  |        |
|                          |   |   |   | 14.44    | 14.92    | 0.11    |        | 20.83    | 15.20    | -1.09   |        | 0.34    | 0.24    | -1.21   |        |
| Palestine                | — | — | — | (10.31,  | (12.45,  | (0.08,  | <0.001 | (16.00,  | (12.78,  | (-1.40, | <0.001 | (0.01,  | (0.03,  | (-1.60, | <0.001 |
|                          |   |   |   | 19.75)   | 17.74)   | 0.13)   |        | 26.78)   | 17.97)   | -0.78)  |        | 2.10)   | 0.87)   | -0.81)  |        |
|                          |   |   |   | 2.07     | 2.82     | 1.10    |        | 10.35    | 11.49    | 0.31    |        | 0.18    | 0.20    | 0.35    |        |
| Panama                   | — | — | — | (0.96,   | (1.76,   | (1.01,  | <0.001 | (7.62,   | (9.24,   | (-0.74, | 0.568  | (0.00,  | (0.01,  | (-0.89, | 0.579  |
|                          |   |   |   | 3.94)    | 4.27)    | 1.18)   |        | 13.79)   | 14.14)   | 1.36)   |        | 1.24)   | 0.84)   | 1.61)   |        |
|                          |   |   |   | 5.24     | 5.25     | -0.00   |        | 70.10    | 72.42    | 0.09    |        | 1.25    | 1.29    | 0.06    |        |
| Papua New Guinea         | — | — | — | (3.64,   | (4.26,   | (-0.04, | 0.815  | (63.94,  | (68.64,  | (-0.14, | 0.451  | (0.55,  | (0.83,  | (-0.19, | 0.629  |
|                          |   |   |   | 7.32)    | 6.40)    | 0.03)   |        | 76.71)   | 76.37)   | 0.33)   |        | 2.46)   | 1.92)   | 0.31)   |        |
|                          |   |   |   | 2.22     | 3.45     | 1.52    |        | 23.75    | 16.53    | -1.09   |        | 0.42    | 0.29    | -1.09   |        |
| Paraguay                 | — | — | — | (1.25,   | (2.55,   | (1.49,  | <0.001 | (20.26,  | (14.48,  | (-1.52, | <0.001 | (0.08,  | (0.08,  | (-1.53, | <0.001 |
|                          |   |   |   | 3.65)    | 4.57)    | 1.56)   |        | 27.68)   | 18.79)   | -0.66)  |        | 1.28)   | 0.74)   | -0.66)  |        |
|                          |   |   |   | 1.73     | 3.74     | 2.70    | <0.001 | 27.09    | 9.71     | -3.40   | <0.001 | 0.46    | 0.16    | -3.65   | <0.001 |

|                       |   |   |   |   |               |               |                |        |                  |                |                |        |              |              |                |        |
|-----------------------|---|---|---|---|---------------|---------------|----------------|--------|------------------|----------------|----------------|--------|--------------|--------------|----------------|--------|
|                       |   |   |   |   | (1.35, 2.18)  | (3.30, 4.23)  | (2.55, 2.85)   |        | (25.52, 28.75)   | (8.99, 10.48)  | (-4.62, -2.17) |        | (0.28, 0.74) | (0.08, 0.29) | (-5.20, -2.07) |        |
|                       |   |   |   |   | 7.82          | 8.48          | 0.28           |        | 18.65            | 56.26          | 3.98           |        | 0.32         | 1.00         | 4.08           |        |
| Philippines           | — | — | — | — | (7.30, 8.37)  | (8.09, 8.89)  | (0.26, 0.30)   | <0.001 | (17.85, 19.48)   | (55.26, 57.29) | (3.51, 4.45)   | <0.001 | (0.23, 0.45) | (0.87, 1.14) | (3.45, 4.71)   | <0.001 |
|                       |   |   |   |   | 2.52          | 2.40          | -0.16          |        | 7.37             | 4.05           | -2.16          |        | 0.13         | 0.07         | -2.11          |        |
| Poland                | — | — | — | — | (2.19, 2.89)  | (2.07, 2.79)  | (-0.19, -0.13) | <0.001 | (6.79, 7.99)     | (3.60, 4.55)   | (-2.52, -1.80) | <0.001 | (0.06, 0.24) | (0.02, 0.18) | (-2.97, -1.24) | <0.001 |
|                       |   |   |   |   | 1.28          | 0.91          | -1.17          |        | 2.17             | 1.19           | -2.06          |        | 0.04         | 0.02         | -2.24          |        |
| Portugal              | — | — | — | — | (0.82, 1.90)  | (0.52, 1.52)  | (-1.26, -1.07) | <0.001 | (1.56, 2.94)     | (0.72, 1.87)   | (-2.45, -1.66) | <0.001 | (0.00, 0.27) | (0.00, 0.32) | (-2.24, -2.24) | <0.001 |
|                       |   |   |   |   | 10.69         | 10.64         | -0.02          |        | 26.70            | 24.37          | -0.42          |        | 0.45         | 0.42         | -0.72          |        |
| Puerto Rico           | — | — | — | — | (8.43, 13.36) | (8.21, 13.61) | (-0.03, -0.00) | 0.031  | (23.07, 30.75)   | (20.60, 28.67) | (-1.02, 0.18)  | 0.173  | (0.10, 1.28) | (0.07, 1.40) | (-0.98, -0.47) | <0.001 |
|                       |   |   |   |   | 11.00         | 9.91          | -0.38          |        | 22.46            | 7.64           | -3.42          |        | 0.37         | 0.12         | -3.67          |        |
| Qatar                 | — | — | — | — | (4.76, 22.67) | (7.24, 13.70) | (-0.42, -0.34) | <0.001 | (12.73, 37.46)   | (5.10, 11.40)  | (-4.67, -2.14) | <0.001 | (0.00, 7.67) | (0.00, 2.06) | (-4.79, -2.53) | <0.001 |
|                       |   |   |   |   | 8.63          | 7.54          | -0.48          |        | 37.94            | 4.16           | -7.41          |        | 0.63         | 0.06         | -7.83          |        |
| Republic of Korea     | — | — | — | — | (8.06, 9.23)  | (6.99, 8.12)  | (-0.54, -0.41) | <0.001 | (36.74, 39.16)   | (3.74, 4.63)   | (-7.88, -6.93) | <0.001 | (0.48, 0.80) | (0.02, 0.15) | (-8.66, -6.99) | <0.001 |
|                       |   |   |   |   | 0.66          | 0.66          | 0.03           |        | 3.79             | 10.17          | 3.30           |        | 0.07         | 0.18         | 3.25           |        |
| Republic of Moldova   | — | — | — | — | (0.25, 1.46)  | (0.22, 1.75)  | (-0.17, 0.22)  | 0.794  | (2.64, 5.30)     | (7.90, 12.99)  | (2.53, 4.08)   | <0.001 | (0.00, 0.61) | (0.01, 1.11) | (2.28, 4.23)   | <0.001 |
|                       |   |   |   |   | 2.24          | 2.09          | -0.24          |        | 17.25            | 12.02          | -1.27          |        | 0.30         | 0.21         | -1.32          |        |
| Romania               | — | — | — | — | (1.82, 2.74)  | (1.62, 2.67)  | (-0.31, -0.18) | <0.001 | (16.04, 18.53)   | (10.82, 13.34) | (-2.03, -0.51) | 0.001  | (0.16, 0.53) | (0.08, 0.47) | (-2.16, -0.47) | 0.002  |
|                       |   |   |   |   | 0.35          | 0.37          | 0.25           |        | 5.00             | 6.76           | 1.17           |        | 0.09         | 0.12         | 0.96           |        |
| Russian Federation    | — | — | — | — | (0.29, 0.43)  | (0.31, 0.45)  | (-0.09, 0.59)  | 0.144  | (4.76, 5.25)     | (6.46, 7.07)   | (0.03, 2.34)   | 0.045  | (0.06, 0.13) | (0.08, 0.17) | (-0.32, 2.26)  | 0.142  |
|                       |   |   |   |   | 6.13          | 6.68          | 0.29           |        | 217.44           | 54.36          | -4.72          |        | 3.88         | 0.96         | -4.76          |        |
| Rwanda                | — | — | — | — | (4.78, 7.75)  | (5.69, 7.79)  | (0.15, 0.43)   | <0.001 | (209.11, 226.02) | (51.51, 57.34) | (-5.07, -4.36) | <0.001 | (2.84, 5.20) | (0.61, 1.43) | (-5.12, -4.39) | <0.001 |
| Saint Kitts and Nevis | — | — | — | — | 5.43          | 5.41          | -0.02          | 0.365  | 63.22            | 16.07          | -4.60          | <0.001 | 1.13         | 0.28         | -4.71          | <0.001 |

|                                  |   |   |   |   |               |               |                |        |                 |                 |                |        |               |               |                |
|----------------------------------|---|---|---|---|---------------|---------------|----------------|--------|-----------------|-----------------|----------------|--------|---------------|---------------|----------------|
| Nevis                            |   |   |   |   | (0.00, 60.84) | (0.03, 45.84) | (-0.06, 0.02)  |        | (20.71, 149.22) | (1.82, 63.17)   | (-4.96, -4.23) |        | (0.00, 52.74) | (0.00, 36.86) | (-5.13, -4.29) |
|                                  |   |   |   |   | 7.42          | 7.44          | 0.01           |        | 50.25           | 31.57           | -1.61          |        | 0.89          | 0.56          | -1.58          |
| Saint Lucia                      | — | — | — | — | (0.68, 30.86) | (1.32, 24.34) | (-0.04, 0.07)  | 0.670  | (25.68, 89.47)  | (15.83, 57.11)  | (-2.35, -0.86) | <0.001 | (0.00, 19.83) | (0.00, 13.26) | (-2.24, -0.91) |
|                                  |   |   |   |   | 9.87          | 9.58          | -0.11          |        | 83.99           | 76.11           | -0.28          |        | 1.47          | 1.34          | -0.25          |
| Saint Vincent and the Grenadines | — | — | — | — | (0.96, 40.54) | (1.18, 34.96) | (-0.18, -0.04) | 0.003  | (47.54, 139.05) | (43.53, 123.89) | (-0.81, 0.25)  | 0.303  | (0.00, 26.53) | (0.00, 20.96) | (-0.78, 0.28)  |
|                                  |   |   |   |   | 9.22          | 9.15          | -0.03          |        | 76.45           | 81.08           | 0.20           |        | 1.37          | 1.45          | 0.18           |
| Samoa                            | — | — | — | — | (1.28, 32.74) | (1.96, 26.70) | (-0.05, -0.01) | 0.005  | (45.59, 120.99) | (53.89, 117.52) | (0.16, 0.25)   | <0.001 | (0.00, 19.70) | (0.00, 14.31) | (0.11, 0.26)   |
|                                  |   |   |   |   | 2.55          | 1.85          | -1.11          |        | 1.85            | 2.47            | 1.01           |        | 0.03          | 0.04          | 0.98           |
| San Marino                       | — | — | — | — | (0.00, 98.34) | (0.00, 82.27) | (-1.16, -1.05) | <0.001 | (0.00, 96.96)   | (0.00, 83.42)   | (0.86, 1.16)   | <0.001 | (0.00, 93.35) | (0.00, 79.03) | (0.98, 0.98)   |
|                                  |   |   |   |   | 7.66          | 8.00          | 0.15           |        | 44.06           | 42.74           | 0.09           |        | 0.77          | 0.74          | 0.06           |
| Sao Tome and Principe            | — | — | — | — | (0.36, 38.78) | (1.69, 23.41) | (0.13, 0.17)   | <0.001 | (18.35, 90.57)  | (24.85, 68.83)  | (-0.81, 1.01)  | 0.840  | (0.00, 26.77) | (0.00, 11.50) | (-0.83, 0.95)  |
|                                  |   |   |   |   | 7.07          | 7.95          | 0.41           |        | 34.28           | 24.82           | -1.15          |        | 0.60          | 0.43          | -1.19          |
| Saudi Arabia                     | — | — | — | — | (6.01, 8.27)  | (7.37, 8.58)  | (0.38, 0.44)   | <0.001 | (31.93, 36.76)  | (23.76, 25.91)  | (-1.30, -1.00) | <0.001 | (0.33, 1.03)  | (0.31, 0.61)  | (-1.52, -0.86) |
|                                  |   |   |   |   | 7.86          | 7.87          | -0.00          |        | 61.38           | 63.98           | 0.28           |        | 1.07          | 1.11          | 0.27           |
| Senegal                          | — | — | — | — | (6.31, 9.69)  | (6.83, 9.03)  | (-0.03, 0.03)  | 0.930  | (57.04, 65.99)  | (61.01, 67.06)  | (-0.62, 1.19)  | 0.542  | (0.56, 1.86)  | (0.75, 1.59)  | (-0.64, 1.18)  |
|                                  |   |   |   |   | 1.28          | 0.88          | -1.27          |        | 7.11            | 3.22            | -2.63          |        | 0.13          | 0.06          | -2.49          |
| Serbia                           | — | — | — | — | (0.81, 1.93)  | (0.48, 1.53)  | (-1.48, -1.06) | <0.001 | (5.93, 8.47)    | (2.38, 4.28)    | (-3.51, -1.74) | <0.001 | (0.02, 0.45)  | (0.00, 0.41)  | (-3.26, -1.72) |
|                                  |   |   |   |   | 12.32         | 12.24         | -0.02          |        | 131.11          | 65.74           | -2.37          |        | 2.32          | 1.15          | -2.40          |
| Seychelles                       | — | — | — | — | (0.93, 56.18) | (1.78, 43.88) | (-0.03, -0.00) | 0.033  | (76.12, 213.31) | (33.96, 116.49) | (-2.85, -1.89) | <0.001 | (0.00, 39.60) | (0.00, 25.95) | (-2.91, -1.90) |
|                                  |   |   |   |   | 6.32          | 6.34          | 0.01           |        | 61.20           | 102.81          | 1.86           |        | 1.07          | 1.79          | 1.85           |
| Sierra Leone                     | — | — | — | — | (4.49, 8.65)  | (5.12, 7.79)  | (-0.02, 0.05)  | 0.474  | (55.32, 67.55)  | (97.83, 107.98) | (1.67, 2.05)   | <0.001 | (0.42, 2.25)  | (1.18, 2.61)  | (1.66, 2.04)   |
|                                  |   |   |   |   | 6.36          | 4.67          | -1.06          | <0.001 | 10.87           | 4.62            | -3.04          | <0.001 | 0.19          | 0.08          | -3.05          |
| Singapore                        | — | — | — | — |               |               |                |        |                 |                 |                |        |               |               |                |

|                 |   |   |   |   |         |         |         |        |          |          |         |        |        |        |         |        |
|-----------------|---|---|---|---|---------|---------|---------|--------|----------|----------|---------|--------|--------|--------|---------|--------|
|                 |   |   |   |   | (4.70,  | (3.58,  | (-1.14, |        | (8.65,   | (3.49,   | (-3.50, |        | (0.01, | (0.00, | (-3.26, |        |
|                 |   |   |   |   | 8.47)   | 6.15)   | -0.98)  |        | 13.53)   | 6.14)    | -2.57)  |        | 0.94)  | 0.79)  | -2.83)  |        |
|                 |   |   |   |   | 1.87    | 1.42    | -0.89   |        | 5.98     | 5.15     | -0.42   |        | 0.10   | 0.09   | -0.22   |        |
| Slovakia        | — | — | — | — | (1.15,  | (0.80,  | (-1.11, | <0.001 | (4.62,   | (3.82,   | (-1.11, | 0.231  | (0.00, | (0.00, | (-0.91, | 0.535  |
|                 |   |   |   |   | 2.90)   | 2.48)   | -0.67)  |        | 7.65)    | 6.90)    | 0.27)   |        | 0.59)  | 0.76)  | 0.48)   |        |
|                 |   |   |   |   | 1.68    | 1.01    | -1.72   |        | 3.14     | 1.65     | -2.25   |        | 0.05   | 0.03   | -1.72   |        |
| Slovenia        | — | — | — | — | (0.67,  | (0.24,  | (-1.86, | <0.001 | (1.67,   | (0.56,   | (-2.82, | <0.001 | (0.00, | (0.00, | (-1.72, | <0.001 |
|                 |   |   |   |   | 3.60)   | 3.26)   | -1.59)  |        | 5.51)    | 4.16)    | -1.66)  |        | 1.25)  | 1.86)  | -1.72)  |        |
|                 |   |   |   |   | 4.63    | 4.67    | 0.03    |        | 160.36   | 150.93   | -0.22   |        | 2.90   | 2.72   | -0.24   |        |
| Solomon Islands | — | — | — | — | (0.63,  | (1.63,  | (-0.00, | 0.076  | (126.25, | (129.74, | (-0.32, | <0.001 | (0.17, | (0.61, | (-0.34, | <0.001 |
|                 |   |   |   |   | 16.67)  | 10.51)  | 0.06)   |        | 201.20)  | 174.65)  | -0.12)  |        | 13.92) | 7.72)  | -0.13)  |        |
|                 |   |   |   |   | 6.27    | 6.22    | -0.02   |        | 198.15   | 106.78   | -2.09   |        | 3.54   | 1.90   | -2.11   |        |
| Somalia         | — | — | — | — | (4.91,  | (5.36,  | (-0.07, | 0.452  | (190.16, | (103.17, | (-2.19, | <0.001 | (2.55, | (1.44, | (-2.23, | <0.001 |
|                 |   |   |   |   | 7.88)   | 7.19)   | 0.03)   |        | 206.40)  | 110.48)  | -2.00)  |        | 4.81)  | 2.46)  | -1.98)  |        |
|                 |   |   |   |   | 3.76    | 3.36    | -0.38   |        | 159.33   | 52.81    | -3.64   |        | 2.86   | 0.94   | -3.69   |        |
| South Africa    | — | — | — | — | (3.31,  | (3.04,  | (-0.42, | <0.001 | (156.39, | (51.55,  | (-5.96, | 0.003  | (2.48, | (0.78, | (-6.02, | 0.003  |
|                 |   |   |   |   | 4.25)   | 3.70)   | -0.34)  |        | 162.31)  | 54.11)   | -1.26)  |        | 3.29)  | 1.13)  | -1.30)  |        |
|                 |   |   |   |   | 8.05    | 7.96    | -0.03   |        | 108.30   | 54.67    | -2.35   |        | 1.92   | 0.96   | -2.38   |        |
| South Sudan     | — | — | — | — | (6.21,  | (6.60,  | (-0.06, | 0.012  | (101.38, | (51.05,  | (-2.60, | <0.001 | (1.10, | (0.53, | (-2.64, | <0.001 |
|                 |   |   |   |   | 10.29)  | 9.52)   | -0.01)  |        | 115.59)  | 58.50)   | -2.10)  |        | 3.16)  | 1.61)  | -2.13)  |        |
|                 |   |   |   |   | 1.69    | 1.26    | -1.01   |        | 2.37     | 1.99     | -0.59   |        | 0.04   | 0.03   | -0.97   |        |
| Spain           | — | — | — | — | (1.40,  | (1.01,  | (-1.09, | <0.001 | (2.03,   | (1.67,   | (-0.79, | <0.001 | (0.01, | (0.01, | (-0.97, | <0.001 |
|                 |   |   |   |   | 2.02)   | 1.55)   | -0.94)  |        | 2.75)    | 2.36)    | -0.40)  |        | 0.12)  | 0.12)  | -0.97)  |        |
|                 |   |   |   |   | 6.45    | 6.45    | -0.01   |        | 35.08    | 14.85    | -2.82   |        | 0.60   | 0.25   | -2.84   |        |
| Sri Lanka       | — | — | — | — | (5.63,  | (5.72,  | (-0.03, | 0.428  | (33.16,  | (13.72,  | (-3.48, | <0.001 | (0.37, | (0.13, | (-3.51, | <0.001 |
|                 |   |   |   |   | 7.35)   | 7.25)   | 0.01)   |        | 37.08)   | 16.05)   | -2.15)  |        | 0.92)  | 0.46)  | -2.16)  |        |
|                 |   |   |   |   | 12.43   | 13.90   | 0.38    |        | 111.42   | 60.76    | -2.05   |        | 1.93   | 1.04   | -2.09   |        |
| Sudan           | — | — | — | — | (11.24, | (13.09, | (0.29,  | <0.001 | (107.89, | (59.08,  | (-2.19, | <0.001 | (1.49, | (0.83, | (-2.25, | <0.001 |
|                 |   |   |   |   | 13.72)  | 14.75)  | 0.48)   |        | 115.03)  | 62.48)   | -1.91)  |        | 2.47)  | 1.29)  | -1.93)  |        |
|                 |   |   |   |   | 8.34    | 8.63    | 0.11    |        | 70.02    | 61.19    | -0.33   |        | 1.24   | 1.08   | -0.33   |        |
| Suriname        | — | — | — | — | (2.86,  | (4.05,  | (0.09,  | <0.001 | (51.31,  | (47.45,  | (-1.51, | 0.593  | (0.01, | (0.04, | (-1.61, | 0.610  |
|                 |   |   |   |   | 19.26)  | 16.19)  | 0.13)   |        | 93.60)   | 77.74)   | 0.87)   |        | 8.60)  | 5.49)  | 0.96)   |        |
|                 |   |   |   |   | 4.64    | 2.28    | -2.23   | <0.001 | 1.55     | 1.63     | 0.26    | 0.289  | 0.02   | 0.02   | 1.08    | 0.241  |

|                               |   |   |   |   |                    |                    |                   |        |                    |                    |                   |        |                    |                    |                   |        |
|-------------------------------|---|---|---|---|--------------------|--------------------|-------------------|--------|--------------------|--------------------|-------------------|--------|--------------------|--------------------|-------------------|--------|
|                               |   |   |   |   | (3.62,<br>5.87)    | (1.62,<br>3.16)    | (-2.79,<br>-1.67) |        | (0.98,<br>2.35)    | (1.06,<br>2.41)    | (-0.22,<br>0.74)  |        | (0.00,<br>0.33)    | (0.00,<br>0.34)    | (-0.72,<br>2.91)  |        |
|                               |   |   |   |   | 1.06               | 0.72               | -1.34             |        | 1.00               | 0.78               | -0.85             |        | 0.02               | 0.01               | -2.26             |        |
| Switzerland                   | — | — | — | — | (0.59,<br>1.82)    | (0.36,<br>1.36)    | (-1.56,<br>-1.12) | <0.001 | (0.53,<br>1.76)    | (0.39,<br>1.46)    | (-1.21,<br>-0.50) | <0.001 | (0.00,<br>0.42)    | (0.00,<br>0.41)    | (-2.26,<br>-2.26) | <0.001 |
|                               |   |   |   |   | 4.39               | 4.78               | 0.29              |        | 30.57              | 13.28              | -2.80             |        | 0.52               | 0.22               | -2.86             |        |
| Syrian Arab<br>Republic       | — | — | — | — | (3.46,<br>5.50)    | (3.97,<br>5.74)    | (0.26,<br>0.32)   | <0.001 | (28.16,<br>33.14)  | (11.91,<br>14.78)  | (-3.14,<br>-2.46) | <0.001 | (0.25,<br>0.98)    | (0.08,<br>0.52)    | (-3.41,<br>-2.31) | <0.001 |
|                               |   |   |   |   | 5.75               | 5.83               | 0.04              |        | 9.10               | 4.69               | -2.22             |        | 0.15               | 0.07               | -2.28             |        |
| Taiwan (Province<br>of China) | — | — | — | — | (5.08,<br>6.48)    | (5.16,<br>6.58)    | (0.02,<br>0.07)   | <0.001 | (8.25,<br>10.01)   | (4.08,<br>5.38)    | (-2.77,<br>-1.67) | <0.001 | (0.06,<br>0.32)    | (0.02,<br>0.24)    | (-3.51,<br>-1.03) | <0.001 |
|                               |   |   |   |   | 1.96               | 1.82               | -0.26             |        | 33.75              | 27.69              | -0.62             |        | 0.63               | 0.51               | -0.65             |        |
| Tajikistan                    | — | — | — | — | (1.11,<br>3.22)    | (1.25,<br>2.56)    | (-0.32,<br>-0.21) | <0.001 | (29.84,<br>38.05)  | (25.33,<br>30.22)  | (-1.06,<br>-0.17) | 0.007  | (0.20,<br>1.49)    | (0.24,<br>0.97)    | (-1.19,<br>-0.10) | 0.020  |
|                               |   |   |   |   | 2.69               | 2.80               | 0.13              |        | 7.47               | 4.93               | -1.42             |        | 0.13               | 0.08               | -1.61             |        |
| Thailand                      | — | — | — | — | (2.41,<br>3.00)    | (2.53,<br>3.10)    | (0.09,<br>0.17)   | <0.001 | (6.99,<br>7.97)    | (4.56,<br>5.33)    | (-2.66,<br>-0.17) | 0.026  | (0.07,<br>0.21)    | (0.04,<br>0.15)    | (-2.70,<br>-0.51) | 0.004  |
|                               |   |   |   |   | 4.44               | 4.79               | 0.27              |        | 31.54              | 34.64              | 0.38              |        | 0.56               | 0.61               | 0.34              |        |
| Timor-Leste                   | — | — | — | — | (1.62,<br>9.86)    | (2.24,<br>9.06)    | (0.24,<br>0.29)   | <0.001 | (22.82,<br>42.61)  | (27.06,<br>43.78)  | (-0.28,<br>1.04)  | 0.260  | (0.01,<br>4.06)    | (0.03,<br>3.16)    | (-0.33,<br>1.00)  | 0.320  |
|                               |   |   |   |   | 6.08               | 6.04               | -0.00             |        | 83.18              | 90.73              | 0.36              |        | 1.46               | 1.59               | 0.35              |        |
| Togo                          | — | — | — | — | (4.24,<br>8.47)    | (4.88,<br>7.39)    | (-0.09,<br>0.08)  | 0.932  | (76.10,<br>90.76)  | (86.10,<br>95.55)  | (0.01,<br>0.71)   | 0.043  | (0.66,<br>2.83)    | (1.03,<br>2.35)    | (0.03,<br>0.67)   | 0.035  |
|                               |   |   |   |   | 8.13               | 8.28               | 0.07              |        | 116.86             | 89.96              | -0.90             |        | 2.10               | 1.60               | -0.94             |        |
| Tokelau                       | — | — | — | — | (0.00,<br>1718.80) | (0.00,<br>2323.28) | (0.04,<br>0.09)   | <0.001 | (0.00,<br>1911.70) | (0.00,<br>2467.66) | (-0.93,<br>-0.88) | <0.001 | (0.00,<br>1707.90) | (0.00,<br>2311.00) | (-0.98,<br>-0.90) | <0.001 |
|                               |   |   |   |   | 7.03               | 6.95               | -0.05             |        | 20.34              | 16.03              | -0.83             |        | 0.36               | 0.28               | -0.87             |        |
| Tonga                         | — | — | — | — | (0.17,<br>41.32)   | (0.32,<br>33.89)   | (-0.07,<br>-0.02) | 0.001  | (4.00,<br>62.22)   | (3.15,<br>48.20)   | (-1.02,<br>-0.62) | <0.001 | (0.00,<br>29.30)   | (0.00,<br>21.72)   | (-1.25,<br>-0.48) | <0.001 |
|                               |   |   |   |   | 7.79               | 7.70               | -0.04             |        | 72.19              | 32.22              | -2.91             |        | 1.29               | 0.57               | -2.96             |        |
| Trinidad and<br>Tobago        | — | — | — | — | (4.64,<br>12.32)   | (4.87,<br>11.83)   | (-0.07,<br>-0.02) | <0.001 | (61.73,<br>83.95)  | (25.96,<br>39.70)  | (-3.38,<br>-2.42) | <0.001 | (0.27,<br>3.82)    | (0.05,<br>2.71)    | (-3.49,<br>-2.43) | <0.001 |

|                                 |   |   |   |   |         |         |         |        |         |         |         |        |         |         |         |        |
|---------------------------------|---|---|---|---|---------|---------|---------|--------|---------|---------|---------|--------|---------|---------|---------|--------|
|                                 |   |   |   |   | 19.05   | 20.15   | 0.19    |        | 48.07   | 28.57   | -1.79   |        | 0.82    | 0.47    | -1.89   |        |
| Tunisia                         | — | — | — | — | (16.85, | (18.45, | (0.17,  | <0.001 | (44.61, | (26.50, | (-2.01, | <0.001 | (0.42,  | (0.24,  | (-2.14, | <0.001 |
|                                 |   |   |   |   | 21.46)  | 21.98)  | 0.21)   |        | 51.75)  | 30.78)  | -1.57)  |        | 1.45)   | 0.86)   | -1.63)  |        |
|                                 |   |   |   |   | 11.58   | 9.80    | -0.58   |        | 13.50   | 5.29    | -3.15   |        | 0.22    | 0.08    | -3.41   |        |
| Turkey                          | — | — | — | — | (10.94, | (9.35,  | (-0.61, | <0.001 | (12.82, | (4.95,  | (-3.62, | <0.001 | (0.14,  | (0.04,  | (-3.97, | <0.001 |
|                                 |   |   |   |   | 12.26)  | 10.28)  | -0.55)  |        | 14.21)  | 5.64)   | -2.68)  |        | 0.33)   | 0.13)   | -2.84)  |        |
|                                 |   |   |   |   | 2.85    | 2.67    | -0.22   |        | 15.00   | 16.00   | 0.31    |        | 0.26    | 0.28    | 0.31    |        |
| Turkmenistan                    | — | — | — | — | (1.71,  | (1.74,  | (-0.26, | <0.001 | (12.23, | (13.56, | (-0.46, | 0.435  | (0.03,  | (0.05,  | (-0.50, | 0.454  |
|                                 |   |   |   |   | 4.49)   | 3.95)   | -0.19)  |        | 18.24)  | 18.77)  | 1.08)   |        | 1.07)   | 0.89)   | 1.13)   |        |
|                                 |   |   |   |   | 7.20    | 7.32    | 0.05    |        | 139.24  | 99.63   | -1.12   |        | 2.50    | 1.78    | -1.13   |        |
| Tuvalu                          | — | — | — | — | (0.00,  | (0.00,  | (0.03,  | <0.001 | (25.19, | (12.17, | (-1.20, | <0.001 | (0.00,  | (0.00,  | (-1.22, | <0.001 |
|                                 |   |   |   |   | 217.92) | 210.25) | 0.08)   |        | 437.89) | 367.42) | -1.04)  |        | 208.68) | 199.32) | -1.04)  |        |
|                                 |   |   |   |   | 6.63    | 6.60    | -0.05   |        | 65.78   | 51.94   | -0.86   |        | 1.16    | 0.91    | -0.89   |        |
| Uganda                          | — | — | — | — | (5.63,  | (5.98,  | (-0.13, | 0.248  | (62.61, | (50.21, | (-1.25, | <0.001 | (0.78,  | (0.70,  | (-1.28, | <0.001 |
|                                 |   |   |   |   | 7.76)   | 7.27)   | 0.03)   |        | 69.07)  | 53.71)  | -0.46)  |        | 1.69)   | 1.18)   | -0.49)  |        |
|                                 |   |   |   |   | 0.18    | 0.18    | 0.04    |        | 1.52    | 2.88    | 2.24    |        | 0.03    | 0.05    | 1.57    |        |
| Ukraine                         | — | — | — | — | (0.11,  | (0.10,  | (-0.31, | 0.817  | (1.29,  | (2.53,  | (0.19,  | 0.032  | (0.01,  | (0.01,  | (1.57,  | <0.001 |
|                                 |   |   |   |   | 0.29)   | 0.31)   | 0.39)   |        | 1.78)   | 3.29)   | 4.33)   |        | 0.09)   | 0.15)   | 1.57)   |        |
|                                 |   |   |   |   | 21.73   | 22.59   | 0.13    |        | 59.29   | 43.49   | -1.06   |        | 1.00    | 0.73    | -0.98   |        |
| United Arab<br>Emirates         | — | — | — | — | (16.78, | (20.20, | (0.10,  | <0.001 | (50.77, | (39.90, | (-1.38, | <0.001 | (0.20,  | (0.34,  | (-1.39, | <0.001 |
|                                 |   |   |   |   | 27.78)  | 25.29)  | 0.16)   |        | 68.89)  | 47.41)  | -0.73)  |        | 3.11)   | 1.52)   | -0.58)  |        |
|                                 |   |   |   |   | 1.77    | 1.88    | 0.22    |        | 2.85    | 3.12    | 0.34    |        | 0.05    | 0.05    | 0.27    |        |
| United Kingdom                  | — | — | — | — | (1.53,  | (1.65,  | (0.10,  | 0.001  | (2.53,  | (2.81,  | (-0.04, | 0.081  | (0.02,  | (0.02,  | (-0.70, | 0.590  |
|                                 |   |   |   |   | 2.05)   | 2.15)   | 0.34)   |        | 3.19)   | 3.46)   | 0.73)   |        | 0.12)   | 0.12)   | 1.23)   |        |
|                                 |   |   |   |   | 6.46    | 6.60    | 0.07    |        | 92.17   | 54.12   | -1.77   |        | 1.63    | 0.95    | -1.81   |        |
| United Republic of<br>Tanzania  | — | — | — | — | (5.68,  | (6.09,  | (0.05,  | <0.001 | (89.24, | (52.68, | (-2.08, | <0.001 | (1.26,  | (0.77,  | (-1.99, | <0.001 |
|                                 |   |   |   |   | 7.32)   | 7.13)   | 0.09)   |        | 95.18)  | 55.59)  | -1.46)  |        | 2.08)   | 1.17)   | -1.62)  |        |
|                                 |   |   |   |   | 50.06   | 50.95   | 0.11    |        | 19.20   | 32.05   | 1.82    |        | 0.27    | 0.50    | 2.19    |        |
| United States of<br>America     | — | — | — | — | (49.48, | (50.38, | (-0.05, | 0.172  | (18.84, | (31.60, | (1.54,  | <0.001 | (0.23,  | (0.45,  | (1.80,  | <0.001 |
|                                 |   |   |   |   | 50.65)  | 51.54)  | 0.28)   |        | 19.57)  | 32.52)  | 2.11)   |        | 0.32)   | 0.56)   | 2.58)   |        |
|                                 |   |   |   |   | 8.09    | 8.01    | -0.04   |        | 35.22   | 19.41   | -2.00   |        | 0.62    | 0.34    | -2.01   |        |
| United States<br>Virgin Islands | — | — | — | — | (0.77,  | (0.49,  | (-0.09, | 0.101  | (14.76, | (4.50,  | (-2.32, | <0.001 | (0.00,  | (0.00,  | (-2.34, | <0.001 |
|                                 |   |   |   |   | 33.28)  | 39.47)  | 0.01)   |        | 71.83)  | 56.64)  | -1.68)  |        | 20.62)  | 26.65)  | -1.68)  |        |



|              |   |   |   |   |         |         |         |        |          |          |         |        |        |        |         |        |
|--------------|---|---|---|---|---------|---------|---------|--------|----------|----------|---------|--------|--------|--------|---------|--------|
|              |   |   |   |   | 4.89    | 4.76    | -0.10   |        | 9.71     | 8.34     | -0.54   |        | 0.17   | 0.14   | -0.73   |        |
| Uruguay      | — | — | — | — | (3.25,  | (3.21,  | (-0.15, | <0.001 | (7.32,   | (6.24,   | (-0.95, | 0.012  | (0.00, | (0.00, | (-0.89, | <0.001 |
|              |   |   |   |   | 7.08)   | 6.81)   | -0.05)  |        | 12.63)   | 10.94)   | -0.12)  |        | 0.97)  | 0.91)  | -0.56)  |        |
|              |   |   |   |   | 4.83    | 4.65    | -0.13   |        | 14.38    | 16.02    | 0.41    |        | 0.25   | 0.27   | 0.35    |        |
| Uzbekistan   | — | — | — | — | (4.15,  | (4.16,  | (-0.16, | <0.001 | (13.20,  | (15.10,  | (-0.09, | 0.111  | (0.11, | (0.17, | (-0.27, | 0.272  |
|              |   |   |   |   | 5.60)   | 5.18)   | -0.11)  |        | 15.64)   | 16.98)   | 0.91)   |        | 0.47)  | 0.43)  | 0.96)   |        |
|              |   |   |   |   | 6.46    | 6.29    | -0.09   |        | 74.53    | 97.41    | 0.89    |        | 1.33   | 1.74   | 0.88    |        |
| Vanuatu      | — | — | — | — | (0.55,  | (1.46,  | (-0.13, | <0.001 | (44.96,  | (72.94,  | (0.61,  | <0.001 | (0.00, | (0.04, | (0.61,  | <0.001 |
|              |   |   |   |   | 27.15)  | 17.76)  | -0.06)  |        | 116.83)  | 127.69)  | 1.16)   |        | 18.40) | 10.64) | 1.15)   |        |
| Venezuela    |   |   |   |   | 1.69    | 2.97    | 1.93    |        | 47.62    | 27.69    | -1.96   |        | 0.84   | 0.47   | -1.99   |        |
| (Bolivarian  | — | — | — | — | (1.31,  | (2.54,  | (1.70,  | <0.001 | (45.43,  | (26.34,  | (-2.93, | <0.001 | (0.57, | (0.31, | (-3.00, | <0.001 |
| Republic of) |   |   |   |   | 2.15)   | 3.46)   | 2.16)   |        | 49.90)   | 29.10)   | -0.98)  |        | 1.20)  | 0.69)  | -0.96)  |        |
|              |   |   |   |   | 8.32    | 7.80    | -0.22   |        | 35.21    | 19.24    | -2.06   |        | 0.63   | 0.33   | -2.20   |        |
| Viet Nam     | — | — | — | — | (7.82,  | (7.43,  | (-0.24, | <0.001 | (34.18,  | (18.66,  | (-2.19, | <0.001 | (0.49, | (0.26, | (-2.32, | <0.001 |
|              |   |   |   |   | 8.84)   | 8.18)   | -0.21)  |        | 36.26)   | 19.84)   | -1.92)  |        | 0.78)  | 0.42)  | -2.08)  |        |
|              |   |   |   |   | 13.43   | 14.53   | 0.27    |        | 88.51    | 71.92    | -0.68   |        | 1.56   | 1.26   | -0.71   |        |
| Yemen        | — | — | — | — | (11.88, | (13.58, | (0.24,  | <0.001 | (84.49,  | (69.80,  | (-1.08, | 0.001  | (1.07, | (0.99, | (-1.12, | 0.001  |
|              |   |   |   |   | 15.13)  | 15.53)  | 0.29)   |        | 92.68)   | 74.09)   | -0.27)  |        | 2.22)  | 1.57)  | -0.30)  |        |
|              |   |   |   |   | 5.40    | 5.69    | 0.18    |        | 159.83   | 84.45    | -2.18   |        | 2.84   | 1.50   | -2.18   |        |
| Zambia       | — | — | — | — | (4.10,  | (4.89,  | (0.15,  | <0.001 | (152.56, | (81.32,  | (-2.41, | <0.001 | (1.94, | (1.11, | (-2.48, | <0.001 |
|              |   |   |   |   | 7.01)   | 6.60)   | 0.21)   |        | 167.38)  | 87.68)   | -1.95)  |        | 4.05)  | 1.99)  | -1.88)  |        |
|              |   |   |   |   | 1.26    | 1.19    | -0.20   |        | 39.31    | 49.00    | 0.74    |        | 0.70   | 0.87   | 0.74    |        |
| Zimbabwe     | — | — | — | — | (0.77,  | (0.83,  | (-0.25, | <0.001 | (36.33,  | (46.51,  | (-0.67, | 0.305  | (0.35, | (0.57, | (-0.58, | 0.274  |
|              |   |   |   |   | 1.97)   | 1.66)   | -0.15)  |        | 42.48)   | 51.59)   | 2.16)   |        | 1.26)  | 1.29)  | 2.09)   |        |
| <b>Men</b>   |   |   |   |   |         |         |         |        |          |          |         |        |        |        |         |        |
|              |   |   |   |   | 17.70   | 19.61   | 0.35    |        | 118.08   | 106.05   | -0.35   |        | 2.09   | 1.88   | -0.34   |        |
| Afghanistan  | — | — | — | — | (15.24, | (18.45, | (0.33,  | <0.001 | (111.82, | (103.36, | (-0.55, | 0.001  | (1.32, | (1.53, | (-0.55, | 0.001  |
|              |   |   |   |   | 20.46)  | 20.83)  | 0.37)   |        | 124.64)  | 108.79)  | -0.15)  |        | 3.17)  | 2.28)  | -0.14)  |        |
|              |   |   |   |   | 2.44    | 2.13    | -0.45   |        | 10.89    | 10.65    | -0.16   |        | 0.18   | 0.18   | -0.11   |        |
| Albania      | — | — | — | — | (1.39,  | (1.03,  | (-0.54, | <0.001 | (8.57,   | (8.00,   | (-0.86, | 0.664  | (0.01, | (0.00, | (-0.86, | 0.781  |
|              |   |   |   |   | 3.98)   | 3.93)   | -0.36)  |        | 13.66)   | 13.94)   | 0.55)   |        | 0.93)  | 1.15)  | 0.65)   |        |
|              |   |   |   |   | 20.15   | 20.62   | 0.08    |        | 75.57    | 42.94    | -1.94   |        | 1.30   | 0.72   | -1.98   |        |
| Algeria      | — | — | — | — | (18.79, | (19.72, | (0.05,  | <0.001 | (72.98,  | (41.61,  | (-2.31, | <0.001 | (0.98, | (0.56, | (-2.12, | <0.001 |

|                     |   |   |   |   |        |        |         |        |          |          |         |        |        |        |         |        |
|---------------------|---|---|---|---|--------|--------|---------|--------|----------|----------|---------|--------|--------|--------|---------|--------|
|                     |   |   |   |   | 21.59) | 21.56) | 0.11)   |        | 78.23)   | 44.30)   | -1.57)  |        | 1.70)  | 0.92)  | -1.85)  |        |
|                     |   |   |   |   | 7.05   | 7.32   | 0.13    |        | 60.42    | 56.92    | -0.19   |        | 1.09   | 1.02   | -0.21   |        |
| American Samoa      | — | — | — | — | (0.02, | (0.02, | (0.11,  | <0.001 | (20.36,  | (18.23,  | (-0.70, | 0.455  | (0.00, | (0.00, | (-0.69, | 0.401  |
|                     |   |   |   |   | 58.64) | 61.36) | 0.15)   |        | 139.74)  | 136.54)  | 0.31)   |        | 47.54) | 49.73) | 0.28)   |        |
|                     |   |   |   |   | 5.17   | 3.86   | -1.00   |        | 8.84     | 7.20     | -0.70   |        | 0.15   | 0.12   | -0.76   |        |
| Andorra             | — | — | — | — | (0.05, | (0.01, | (-1.03, | <0.001 | (0.45,   | (0.23,   | (-0.79, | <0.001 | (0.00, | (0.00, | (-0.99, | <0.001 |
|                     |   |   |   |   | 46.86) | 43.43) | -0.96)  |        | 52.46)   | 48.49)   | -0.61)  |        | 39.38) | 37.71) | -0.53)  |        |
|                     |   |   |   |   | 4.44   | 4.77   | 0.24    |        | 78.93    | 51.17    | -1.41   |        | 1.42   | 0.91   | -1.46   |        |
| Angola              | — | — | — | — | (3.49, | (4.13, | (0.22,  | <0.001 | (74.77,  | (49.08,  | (-2.09, | <0.001 | (0.91, | (0.65, | (-2.05, | <0.001 |
|                     |   |   |   |   | 5.58)  | 5.47)  | 0.27)   |        | 83.26)   | 53.33)   | -0.73)  |        | 2.11)  | 1.25)  | -0.87)  |        |
|                     |   |   |   |   | 9.33   | 9.02   | -0.11   |        | 52.87    | 48.10    | -0.01   |        | 0.94   | 0.85   | -0.03   |        |
| Antigua and Barbuda | — | — | — | — | (0.28, | (0.71, | (-0.13, | <0.001 | (19.47,  | (21.24,  | (-2.41, | 0.992  | (0.00, | (0.00, | (-2.43, | 0.984  |
|                     |   |   |   |   | 52.01) | 38.87) | -0.09)  |        | 116.29)  | 94.33)   | 2.45)   |        | 36.97) | 24.77) | 2.44)   |        |
|                     |   |   |   |   | 1.61   | 2.05   | 0.89    |        | 28.17    | 17.12    | -1.71   |        | 0.49   | 0.30   | -1.70   |        |
| Argentina           | — | — | — | — | (1.30, | (1.76, | (0.71,  | <0.001 | (26.84,  | (16.26,  | (-2.05, | <0.001 | (0.33, | (0.19, | (-2.18, | <0.001 |
|                     |   |   |   |   | 1.96)  | 2.38)  | 1.06)   |        | 29.56)   | 18.01)   | -1.36)  |        | 0.71)  | 0.43)  | -1.23)  |        |
|                     |   |   |   |   | 2.26   | 2.32   | 0.10    |        | 6.50     | 6.66     | 0.15    |        | 0.11   | 0.11   | 0.01    |        |
| Armenia             | — | — | — | — | (1.29, | (1.29, | (0.00,  | 0.046  | (4.74,   | (4.74,   | (-0.78, | 0.750  | (0.00, | (0.00, | (-1.32, | 0.983  |
|                     |   |   |   |   | 3.72)  | 3.99)  | 0.20)   |        | 8.71)    | 9.20)    | 1.10)   |        | 0.79)  | 1.09)  | 1.37)   |        |
|                     |   |   |   |   | 2.69   | 1.95   | -1.12   |        | 4.58     | 3.68     | -0.76   |        | 0.08   | 0.06   | -0.60   |        |
| Australia           | — | — | — | — | (2.18, | (1.57, | (-1.17, | <0.001 | (3.90,   | (3.14,   | (-1.23, | 0.002  | (0.01, | (0.01, | (-0.89, | <0.001 |
|                     |   |   |   |   | 3.29)  | 2.41)  | -1.06)  |        | 5.35)    | 4.29)    | -0.29)  |        | 0.24)  | 0.21)  | -0.31)  |        |
|                     |   |   |   |   | 5.28   | 3.55   | -1.37   |        | 8.28     | 6.82     | -0.72   |        | 0.14   | 0.12   | -0.66   |        |
| Austria             | — | — | — | — | (4.20, | (2.69, | (-1.42, | <0.001 | (6.90,   | (5.59,   | (-0.99, | <0.001 | (0.02, | (0.01, | (-1.25, | 0.031  |
|                     |   |   |   |   | 6.58)  | 4.63)  | -1.32)  |        | 9.88)    | 8.27)    | -0.45)  |        | 0.53)  | 0.52)  | -0.06)  |        |
|                     |   |   |   |   | 4.15   | 4.10   | -0.04   |        | 58.98    | 40.09    | -1.54   |        | 1.03   | 0.69   | -1.63   |        |
| Azerbaijan          | — | — | — | — | (3.13, | (3.32, | (-0.14, | 0.415  | (55.03,  | (37.50,  | (-3.28, | 0.090  | (0.57, | (0.39, | (-3.44, | 0.082  |
|                     |   |   |   |   | 5.42)  | 5.02)  | 0.06)   |        | 63.16)   | 42.83)   | 0.24)   |        | 1.74)  | 1.15)  | 0.21)   |        |
|                     |   |   |   |   | 9.71   | 9.50   | -0.07   |        | 163.97   | 209.58   | 0.86    |        | 2.95   | 3.79   | 0.87    |        |
| Bahamas             | — | — | — | — | (3.13, | (3.85, | (-0.13, | 0.034  | (130.64, | (177.98, | (0.09,  | 0.028  | (0.21, | (0.73, | (0.09,  | 0.028  |
|                     |   |   |   |   | 23.25) | 19.68) | -0.01)  |        | 203.50)  | 245.28)  | 1.63)   |        | 13.27) | 11.63) | 1.66)   |        |
|                     |   |   |   |   | 10.75  | 10.54  | -0.07   |        | 26.43    | 16.92    | -1.57   |        | 0.43   | 0.27   | -1.64   |        |
| Bahrain             | — | — | — | — | (6.56, | (7.86, | (-0.11, | <0.001 | (18.78,  | (12.72,  | (-2.20, | <0.001 | (0.00, | (0.00, | (-2.34, | <0.001 |

|                |   |   |   |   |        |        |         |        |         |         |         |        |        |        |         |        |
|----------------|---|---|---|---|--------|--------|---------|--------|---------|---------|---------|--------|--------|--------|---------|--------|
|                |   |   |   |   | 17.74) | 14.28) | -0.03)  |        | 36.89)  | 22.33)  | -0.92)  |        | 4.98)  | 2.23)  | -0.93)  |        |
|                |   |   |   |   | 2.73   | 2.94   | 0.26    |        | 27.45   | 22.76   | -0.63   |        | 0.49   | 0.40   | -0.67   |        |
| Bangladesh     | — | — | — | — | (2.49, | (2.76, | (0.22,  | <0.001 | (26.70, | (22.24, | (-0.95, | <0.001 | (0.39, | (0.34, | (-0.98, | <0.001 |
|                |   |   |   |   | 2.98)  | 3.14)  | 0.30)   |        | 28.21)  | 23.29)  | -0.30)  |        | 0.60)  | 0.48)  | -0.35)  |        |
|                |   |   |   |   | 5.29   | 5.23   | -0.04   |        | 31.81   | 26.21   | -0.66   |        | 0.57   | 0.46   | -0.67   |        |
| Barbados       | — | — | — | — | (1.01, | (0.96, | (-0.08, | 0.021  | (18.48, | (14.12, | (-1.34, | 0.058  | (0.00, | (0.00, | (-1.42, | 0.086  |
|                |   |   |   |   | 16.14) | 16.62) | -0.01)  |        | 51.13)  | 44.80)  | 0.02)   |        | 8.33)  | 8.89)  | 0.09)   |        |
|                |   |   |   |   | 0.61   | 0.63   | 0.11    |        | 20.84   | 11.57   | -2.16   |        | 0.38   | 0.21   | -2.19   |        |
| Belarus        | — | — | — | — | (0.33, | (0.33, | (0.02,  | 0.024  | (18.95, | (10.09, | (-3.34, | <0.001 | (0.17, | (0.06, | (-3.60, | 0.003  |
|                |   |   |   |   | 1.07)  | 1.18)  | 0.21)   |        | 22.89)  | 13.25)  | -0.96)  |        | 0.77)  | 0.64)  | -0.76)  |        |
|                |   |   |   |   | 3.15   | 2.43   | -0.93   |        | 5.05    | 2.62    | -2.24   |        | 0.08   | 0.04   | -2.43   |        |
| Belgium        | — | — | — | — | (2.43, | (1.79, | (-1.07, | <0.001 | (4.09,  | (1.93,  | (-2.70, | <0.001 | (0.01, | (0.00, | (-3.84, | 0.001  |
|                |   |   |   |   | 4.04)  | 3.26)  | -0.78)  |        | 6.17)   | 3.48)   | -1.78)  |        | 0.37)  | 0.32)  | -1.00)  |        |
|                |   |   |   |   | 6.44   | 6.58   | 0.08    |        | 34.98   | 60.17   | 1.93    |        | 0.61   | 1.07   | 1.96    |        |
| Belize         | — | — | — | — | (0.69, | (2.18, | (0.03,  | 0.001  | (17.22, | (44.37, | (1.15,  | <0.001 | (0.00, | (0.02, | (1.04,  | <0.001 |
|                |   |   |   |   | 25.29) | 15.26) | 0.12)   |        | 64.19)  | 79.86)  | 2.71)   |        | 15.40) | 6.88)  | 2.89)   |        |
|                |   |   |   |   | 7.25   | 7.36   | 0.05    |        | 47.71   | 70.81   | 1.39    |        | 0.84   | 1.25   | 1.40    |        |
| Benin          | — | — | — | — | (5.30, | (6.18, | (0.03,  | <0.001 | (42.56, | (67.10, | (1.23,  | <0.001 | (0.29, | (0.80, | (1.20,  | <0.001 |
|                |   |   |   |   | 9.69)  | 8.72)  | 0.08)   |        | 53.34)  | 74.68)  | 1.56)   |        | 1.93)  | 1.87)  | 1.59)   |        |
|                |   |   |   |   | 3.92   | 3.83   | -0.07   |        | 15.66   | 10.77   | -1.14   |        | 0.27   | 0.19   | -1.23   |        |
| Bermuda        | — | — | — | — | (0.01, | (0.00, | (-0.11, | 0.001  | (2.15,  | (0.37,  | (-1.47, | <0.001 | (0.00, | (0.00, | (-1.60, | <0.001 |
|                |   |   |   |   | 45.83) | 58.13) | -0.03)  |        | 63.38)  | 68.96)  | -0.82)  |        | 40.28) | 52.49) | -0.85)  |        |
|                |   |   |   |   | 1.47   | 1.58   | 0.27    |        | 20.53   | 14.03   | -1.31   |        | 0.37   | 0.25   | -1.35   |        |
| Bhutan         | — | — | — | — | (0.11, | (0.31, | (0.18,  | <0.001 | (12.83, | (9.16,  | (-1.46, | <0.001 | (0.00, | (0.00, | (-1.57, | <0.001 |
|                |   |   |   |   | 6.56)  | 4.85)  | 0.35)   |        | 31.37)  | 20.69)  | -1.15)  |        | 4.68)  | 2.72)  | -1.12)  |        |
| Bolivia        |   |   |   |   | 1.65   | 1.81   | 0.33    |        | 41.14   | 29.01   | -1.20   |        | 0.70   | 0.49   | -1.23   |        |
| (Plurinational | — | — | — | — | (1.00, | (1.33, | (0.28,  | <0.001 | (37.44, | (26.88, | (-1.29, | <0.001 | (0.30, | (0.25, | (-1.41, | <0.001 |
| State of)      |   |   |   |   | 2.59)  | 2.42)  | 0.38)   |        | 45.12)  | 31.26)  | -1.11)  |        | 1.43)  | 0.88)  | -1.04)  |        |
|                |   |   |   |   | 3.99   | 3.51   | -0.43   |        | 21.01   | 12.47   | -1.97   |        | 0.36   | 0.21   | -2.07   |        |
| Bosnia and     |   |   |   |   | (2.86, | (2.15, | (-0.49, | <0.001 | (18.29, | (9.69,  | (-2.52, | <0.001 | (0.09, | (0.01, | (-2.65, | <0.001 |
| Herzegovina    | — | — | — | — | 5.44)  | 5.49)  | -0.37)  |        | 24.04)  | 15.87)  | -1.41)  |        | 0.98)  | 1.19)  | -1.49)  |        |
|                |   |   |   |   | 2.19   | 2.19   | 0.01    |        | 56.02   | 51.82   | -0.22   |        | 1.01   | 0.93   | -0.23   |        |
| Botswana       | — | — | — | — | (0.59, | (1.13, | (-0.06, | 0.877  | (45.76, | (45.95, | (-0.46, | 0.083  | (0.11, | (0.31, | (-0.46, | 0.054  |

|                          |   |   |   |   |         |         |         |        |         |          |         |        |        |        |         |        |
|--------------------------|---|---|---|---|---------|---------|---------|--------|---------|----------|---------|--------|--------|--------|---------|--------|
|                          |   |   |   |   | 5.73)   | 3.86)   | 0.07)   |        | 67.96)  | 58.25)   | 0.03)   |        | 3.95)  | 2.20)  | 0.00)   |        |
|                          |   |   |   |   | 0.93    | 1.40    | 1.41    |        | 52.03   | 27.75    | -2.15   |        | 0.94   | 0.49   | -2.23   |        |
| Brazil                   | — | — | — | — | (0.83,  | (1.30,  | (1.24,  | <0.001 | (51.19, | (27.27,  | (-2.34, | <0.001 | (0.83, | (0.43, | (-2.48, | <0.001 |
|                          |   |   |   |   | 1.05)   | 1.52)   | 1.58)   |        | 52.89)  | 28.24)   | -1.97)  |        | 1.06)  | 0.56)  | -1.97)  |        |
|                          |   |   |   |   | 10.98   | 9.43    | -0.53   |        | 80.59   | 37.56    | -2.65   |        | 1.35   | 0.65   | -2.54   |        |
| Brunei Darussalam        | — | — | — | — | (4.53,  | (4.76,  | (-0.56, | <0.001 | (60.42, | (27.23,  | (-3.15, | <0.001 | (0.02, | (0.01, | (-3.08, | <0.001 |
|                          |   |   |   |   | 22.70)  | 17.27)  | -0.51)  |        | 105.64) | 50.89)   | -2.13)  |        | 8.80)  | 5.26)  | -1.99)  |        |
|                          |   |   |   |   | 9.99    | 8.60    | -0.51   |        | 62.02   | 128.42   | 2.55    |        | 1.10   | 2.30   | 2.55    |        |
| Bulgaria                 | — | — | — | — | (8.50,  | (7.06,  | (-0.53, | <0.001 | (58.20, | (122.09, | (1.97,  | <0.001 | (0.65, | (1.53, | (1.99,  | <0.001 |
|                          |   |   |   |   | 11.67)  | 10.46)  | -0.50)  |        | 66.03)  | 135.06)  | 3.12)   |        | 1.76)  | 3.40)  | 3.12)   |        |
|                          |   |   |   |   | 6.49    | 6.51    | 0.01    |        | 36.52   | 63.18    | 1.95    |        | 0.65   | 1.12   | 1.96    |        |
| Burkina Faso             | — | — | — | — | (5.06,  | (5.66,  | (-0.01, | 0.436  | (33.04, | (60.50,  | (1.62,  | <0.001 | (0.26, | (0.79, | (1.57,  | <0.001 |
|                          |   |   |   |   | 8.22)   | 7.45)   | 0.02)   |        | 40.28)  | 65.95)   | 2.29)   |        | 1.34)  | 1.55)  | 2.36)   |        |
|                          |   |   |   |   | 8.56    | 8.83    | 0.10    |        | 92.58   | 57.58    | -1.67   |        | 1.65   | 1.01   | -1.71   |        |
| Burundi                  | — | — | — | — | (6.68,  | (7.56,  | (0.08,  | <0.001 | (86.25, | (54.31,  | (-1.84, | <0.001 | (0.90, | (0.62, | (-1.87, | <0.001 |
|                          |   |   |   |   | 10.81)  | 10.25)  | 0.13)   |        | 99.27)  | 61.01)   | -1.51)  |        | 2.79)  | 1.57)  | -1.54)  |        |
|                          |   |   |   |   | 8.42    | 8.75    | 0.14    |        | 70.48   | 33.73    | -2.72   |        | 1.25   | 0.58   | -2.81   |        |
| Cabo Verde               | — | — | — | — | (1.83,  | (4.44,  | (0.11,  | <0.001 | (46.98, | (24.56,  | (-3.31, | <0.001 | (0.00, | (0.01, | (-3.38, | <0.001 |
|                          |   |   |   |   | 25.46)  | 15.64)  | 0.17)   |        | 102.81) | 45.34)   | -2.12)  |        | 14.29) | 4.24)  | -2.25)  |        |
|                          |   |   |   |   | 8.33    | 8.72    | 0.16    |        | 57.88   | 38.94    | -1.36   |        | 1.03   | 0.69   | -1.32   |        |
| Cambodia                 | — | — | — | — | (6.84,  | (7.76,  | (0.14,  | <0.001 | (53.93, | (36.89,  | (-1.50, | <0.001 | (0.56, | (0.44, | (-1.51, | <0.001 |
|                          |   |   |   |   | 10.05)  | 9.77)   | 0.18)   |        | 62.05)  | 41.09)   | -1.21)  |        | 1.75)  | 1.03)  | -1.14)  |        |
|                          |   |   |   |   | 4.72    | 6.05    | 0.84    |        | 48.10   | 70.53    | 1.33    |        | 0.85   | 1.25   | 1.32    |        |
| Cameroon                 | — | — | — | — | (3.67,  | (5.39,  | (0.66,  | <0.001 | (44.64, | (68.25,  | (1.18,  | <0.001 | (0.45, | (0.96, | (1.17,  | <0.001 |
|                          |   |   |   |   | 5.98)   | 6.78)   | 1.03)   |        | 51.77)  | 72.88)   | 1.49)   |        | 1.48)  | 1.60)  | 1.47)   |        |
|                          |   |   |   |   | 24.90   | 16.43   | -1.43   |        | 7.47    | 8.46     | 0.47    |        | 0.09   | 0.12   | 1.07    |        |
| Canada                   | — | — | — | — | (23.67, | (15.44, | (-1.50, | <0.001 | (6.79,  | (7.76,   | (0.26,  | <0.001 | (0.03, | (0.05, | (-0.16, | 0.088  |
|                          |   |   |   |   | 26.18)  | 17.46)  | -1.36)  |        | 8.20)   | 9.22)    | 0.67)   |        | 0.22)  | 0.26)  | 2.31)   |        |
|                          |   |   |   |   | 3.50    | 3.23    | -0.27   |        | 83.71   | 76.10    | -0.37   |        | 1.50   | 1.36   | -0.39   |        |
| Central African Republic | — | — | — | — | (1.90,  | (2.11,  | (-0.32, | <0.001 | (75.12, | (70.30,  | (-0.60, | 0.001  | (0.56, | (0.69, | (-0.61, | <0.001 |
|                          |   |   |   |   | 5.93)   | 4.74)   | -0.23)  |        | 93.06)  | 82.25)   | -0.14)  |        | 3.31)  | 2.44)  | -0.17)  |        |
|                          |   |   |   |   | 6.48    | 6.66    | 0.08    |        | 37.88   | 64.92    | 1.97    |        | 0.67   | 1.15   | 1.96    |        |
| Chad                     | — | — | — | — | (4.81,  | (5.57,  | (0.05,  | <0.001 | (33.73, | (61.51,  | (1.54,  | <0.001 | (0.22, | (0.73, | (1.51,  | <0.001 |

|               |   |   |   |   |         |         |         |        |          |          |         |        |         |         |         |        |
|---------------|---|---|---|---|---------|---------|---------|--------|----------|----------|---------|--------|---------|---------|---------|--------|
|               |   |   |   |   | 8.56)   | 7.90)   | 0.12)   |        | 42.41)   | 68.48)   | 2.40)   |        | 1.55)   | 1.72)   | 2.41)   |        |
|               |   |   |   |   | 1.70    | 4.50    | 3.41    |        | 11.25    | 12.73    | 0.47    |        | 0.20    | 0.22    | 0.32    |        |
| Chile         | — | — | — | — | (1.27,  | (3.84,  | (3.35,  | <0.001 | (10.01,  | (11.59,  | (0.02,  | 0.039  | (0.06,  | (0.09,  | (-0.26, | 0.281  |
|               |   |   |   |   | 2.25)   | 5.26)   | 3.48)   |        | 12.60)   | 13.97)   | 0.91)   |        | 0.46)   | 0.45)   | 0.91)   |        |
|               |   |   |   |   | 12.04   | 13.78   | 0.44    |        | 58.51    | 27.07    | -2.63   |        | 1.01    | 0.46    | -2.65   |        |
| China         | — | — | — | — | (11.90, | (13.65, | (0.38,  | <0.001 | (58.22,  | (26.87,  | (-3.04, | <0.001 | (0.97,  | (0.43,  | (-3.27, | <0.001 |
|               |   |   |   |   | 12.17)  | 13.91)  | 0.51)   |        | 58.80)   | 27.26)   | -2.21)  |        | 1.05)   | 0.48)   | -2.03)  |        |
|               |   |   |   |   | 2.17    | 3.16    | 1.30    |        | 26.46    | 10.40    | -3.18   |        | 0.46    | 0.18    | -3.22   |        |
| Colombia      | — | — | — | — | (1.82,  | (2.81,  | (1.25,  | <0.001 | (25.19,  | (9.76,   | (-3.46, | <0.001 | (0.31,  | (0.10,  | (-3.54, | <0.001 |
|               |   |   |   |   | 2.57)   | 3.54)   | 1.35)   |        | 27.77)   | 11.07)   | -2.89)  |        | 0.67)   | 0.29)   | -2.90)  |        |
|               |   |   |   |   | 11.12   | 11.52   | 0.13    |        | 79.97    | 50.55    | -1.56   |        | 1.42    | 0.89    | -1.59   |        |
| Comoros       | — | — | — | — | (4.36,  | (6.53,  | (0.11,  | <0.001 | (59.37,  | (39.37,  | (-3.58, | 0.135  | (0.02,  | (0.04,  | (-3.55, | 0.118  |
|               |   |   |   |   | 23.54)  | 18.86)  | 0.15)   |        | 105.69)  | 63.96)   | 0.49)   |        | 9.24)   | 4.44)   | 0.41)   |        |
|               |   |   |   |   | 4.65    | 4.70    | 0.04    |        | 107.11   | 54.22    | -2.34   |        | 1.92    | 0.97    | -2.34   |        |
| Congo         | — | — | — | — | (2.66,  | (3.44,  | (0.02,  | 0.003  | (96.69,  | (49.71,  | (-2.89, | <0.001 | (0.76,  | (0.45,  | (-2.92, | <0.001 |
|               |   |   |   |   | 7.58)   | 6.27)   | 0.07)   |        | 118.40)  | 59.04)   | -1.78)  |        | 4.06)   | 1.81)   | -1.76)  |        |
|               |   |   |   |   | 27.88   | 28.81   | 0.11    |        | 294.97   | 323.91   | 0.35    |        | 5.29    | 5.81    | 0.34    |        |
| Cook Islands  | — | — | — | — | (0.65,  | (0.26,  | (0.10,  | <0.001 | (144.50, | (145.00, | (0.13,  | 0.002  | (0.00,  | (0.00,  | (0.13,  | 0.001  |
|               |   |   |   |   | 170.23) | 198.45) | 0.13)   |        | 542.85)  | 625.84)  | 0.56)   |        | 130.92) | 155.51) | 0.55)   |        |
|               |   |   |   |   | 1.41    | 2.55    | 2.05    |        | 13.36    | 15.82    | 0.50    |        | 0.24    | 0.28    | 0.40    |        |
| Costa Rica    | — | — | — | — | (0.63,  | (1.64,  | (1.98,  | <0.001 | (10.55,  | (13.40,  | (0.02,  | 0.041  | (0.01,  | (0.05,  | (-0.11, | 0.121  |
|               |   |   |   |   | 2.77)   | 3.80)   | 2.11)   |        | 16.72)   | 18.57)   | 0.98)   |        | 1.13)   | 0.90)   | 0.92)   |        |
|               |   |   |   |   | 6.75    | 6.72    | -0.01   |        | 44.81    | 67.25    | 1.43    |        | 0.78    | 1.18    | 1.50    |        |
| Cote d'Ivoire | — | — | — | — | (5.65,  | (6.02,  | (-0.04, | 0.603  | (41.98,  | (65.01,  | (1.08,  | <0.001 | (0.45,  | (0.90,  | (1.20,  | <0.001 |
|               |   |   |   |   | 8.00)   | 7.48)   | 0.02)   |        | 47.79)   | 69.54)   | 1.79)   |        | 1.28)   | 1.52)   | 1.80)   |        |
|               |   |   |   |   | 3.86    | 2.30    | -1.77   |        | 13.40    | 8.92     | -1.38   |        | 0.23    | 0.16    | -1.29   |        |
| Croatia       | — | — | — | — | (2.76,  | (1.34,  | (-1.81, | <0.001 | (11.23,  | (6.91,   | (-1.98, | <0.001 | (0.04,  | (0.01,  | (-2.06, | 0.001  |
|               |   |   |   |   | 5.30)   | 3.79)   | -1.73)  |        | 15.90)   | 11.42)   | -0.77)  |        | 0.84)   | 0.98)   | -0.51)  |        |
|               |   |   |   |   | 4.84    | 4.68    | -0.11   |        | 16.03    | 21.37    | 0.86    |        | 0.28    | 0.38    | 0.95    |        |
| Cuba          | — | — | — | — | (3.94,  | (3.77,  | (-0.15, | <0.001 | (14.37,  | (19.36,  | (0.60,  | <0.001 | (0.10,  | (0.16,  | (0.68,  | <0.001 |
|               |   |   |   |   | 5.89)   | 5.76)   | -0.07)  |        | 17.84)   | 23.54)   | 1.13)   |        | 0.62)   | 0.78)   | 1.22)   |        |
|               |   |   |   |   | 1.28    | 0.99    | -0.88   |        | 2.56     | 2.04     | -0.76   |        | 0.04    | 0.03    | -0.93   |        |
| Cyprus        | — | — | — | — | (0.16,  | (0.20,  | (-0.96, | <0.001 | (0.71,   | (0.72,   | (-1.14, | <0.001 | (0.00,  | (0.00,  | (-1.95, | 0.078  |

|                   |   |   |   |   |         |         |         |        |          |         |         |        |        |        |         |        |
|-------------------|---|---|---|---|---------|---------|---------|--------|----------|---------|---------|--------|--------|--------|---------|--------|
|                   |   |   |   |   | 4.73)   | 3.73)   | -0.79)  |        | 6.65)    | 5.18)   | -0.38)  |        | 2.64)  | 2.44)  | 0.10)   |        |
|                   |   |   |   |   | 3.51    | 2.92    | -0.63   |        | 9.03     | 11.14   | 0.81    |        | 0.16   | 0.20   | 0.86    |        |
| Czechia           | — | — | — | — | (2.75,  | (2.21,  | (-0.67, | <0.001 | (7.76,   | (9.68,  | (0.14,  | 0.018  | (0.03, | (0.05, | (0.04,  | 0.040  |
|                   |   |   |   |   | 4.44)   | 3.84)   | -0.59)  |        | 10.45)   | 12.80)  | 1.49)   |        | 0.47)  | 0.61)  | 1.69)   |        |
| Democratic        |   |   |   |   | 5.70    | 5.51    | -0.12   |        | 32.73    | 33.26   | 0.06    |        | 0.56   | 0.57   | 0.04    |        |
| People's Republic | — | — | — | — | (4.96,  | (4.92,  | (-0.14, | <0.001 | (30.93,  | (31.76, | (-0.00, | 0.064  | (0.35, | (0.39, | (-0.08, | 0.502  |
| of Korea          |   |   |   |   | 6.53)   | 6.15)   | -0.10)  |        | 34.61)   | 34.81)  | 0.13)   |        | 0.87)  | 0.82)  | 0.16)   |        |
| Democratic        |   |   |   |   | 4.80    | 4.68    | -0.08   |        | 66.57    | 57.20   | -0.55   |        | 1.20   | 1.03   | -0.54   |        |
| Republic of the   | — | — | — | — | (4.24,  | (4.33,  | (-0.11, | <0.001 | (64.46,  | (55.98, | (-0.73, | <0.001 | (0.93, | (0.87, | (-0.72, | <0.001 |
| Congo             |   |   |   |   | 5.42)   | 5.05)   | -0.06)  |        | 68.73)   | 58.44)  | -0.38)  |        | 1.52)  | 1.21)  | -0.35)  |        |
|                   |   |   |   |   | 1.52    | 1.07    | -1.21   |        | 3.43     | 1.84    | -2.18   |        | 0.06   | 0.03   | -2.34   |        |
| Denmark           | — | — | — | — | (0.86,  | (0.51,  | (-1.33, | <0.001 | (2.39,   | (1.08,  | (-2.72, | <0.001 | (0.00, | (0.00, | (-4.01, | 0.007  |
|                   |   |   |   |   | 2.52)   | 1.99)   | -1.08)  |        | 4.80)    | 2.97)   | -1.65)  |        | 0.54)  | 0.52)  | -0.65)  |        |
|                   |   |   |   |   | 10.77   | 11.10   | 0.11    |        | 85.40    | 55.25   | -1.47   |        | 1.52   | 0.97   | -1.52   |        |
| Djibouti          | — | — | — | — | (4.89,  | (7.41,  | (0.06,  | <0.001 | (66.93,  | (46.56, | (-1.83, | <0.001 | (0.08, | (0.16, | (-1.89, | <0.001 |
|                   |   |   |   |   | 20.73)  | 15.98)  | 0.15)   |        | 107.58)  | 65.09)  | -1.10)  |        | 7.56)  | 3.12)  | -1.15)  |        |
|                   |   |   |   |   | 6.35    | 6.08    | -0.14   |        | 83.92    | 87.91   | 0.12    |        | 1.51   | 1.58   | 0.14    |        |
| Dominica          | — | — | — | — | (0.07,  | (0.07,  | (-0.17, | <0.001 | (41.46,  | (44.57, | (-0.45, | 0.678  | (0.00, | (0.00, | (-0.59, | 0.702  |
|                   |   |   |   |   | 43.16)  | 40.35)  | -0.11)  |        | 152.38)  | 155.78) | 0.70)   |        | 34.34) | 31.97) | 0.88)   |        |
|                   |   |   |   |   | 5.90    | 6.31    | 0.25    |        | 47.16    | 48.45   | 0.14    |        | 0.82   | 0.85   | 0.18    |        |
| Dominican         | — | — | — | — | (4.60,  | (5.31,  | (0.19,  | <0.001 | (43.42,  | (45.61, | (-0.15, | 0.340  | (0.40, | (0.51, | (-0.10, | 0.215  |
| Republic          |   |   |   |   | 7.46)   | 7.45)   | 0.31)   |        | 51.14)   | 51.43)  | 0.44)   |        | 1.53)  | 1.33)  | 0.46)   |        |
|                   |   |   |   |   | 2.18    | 3.73    | 1.88    |        | 62.68    | 62.31   | -0.15   |        | 1.08   | 1.06   | -0.19   |        |
| Ecuador           | — | — | — | — | (1.59,  | (3.12,  | (1.77,  | <0.001 | (59.10,  | (59.72, | (-0.98, | 0.725  | (0.65, | (0.75, | (-1.00, | 0.656  |
|                   |   |   |   |   | 2.94)   | 4.43)   | 1.99)   |        | 66.43)   | 64.99)  | 0.69)   |        | 1.69)  | 1.47)  | 0.64)   |        |
|                   |   |   |   |   | 13.73   | 14.37   | 0.15    |        | 115.08   | 90.40   | -0.84   |        | 1.96   | 1.52   | -0.89   |        |
| Egypt             | — | — | — | — | (13.00, | (13.86, | (0.10,  | <0.001 | (113.02, | (89.11, | (-1.34, | 0.001  | (1.70, | (1.36, | (-1.37, | <0.001 |
|                   |   |   |   |   | 14.50)  | 14.90)  | 0.20)   |        | 117.18)  | 91.70)  | -0.34)  |        | 2.26)  | 1.70)  | -0.40)  |        |
|                   |   |   |   |   | 0.75    | 1.33    | 2.00    |        | 36.17    | 23.24   | -1.61   |        | 0.62   | 0.41   | -1.57   |        |
| El Salvador       | — | — | — | — | (0.31,  | (0.75,  | (1.90,  | <0.001 | (32.22,  | (20.46, | (-2.76, | 0.007  | (0.21, | (0.12, | (-2.74, | 0.010  |
|                   |   |   |   |   | 1.60)   | 2.20)   | 2.10)   |        | 40.49)   | 26.30)  | -0.44)  |        | 1.48)  | 1.02)  | -0.38)  |        |
|                   |   |   |   |   | 4.11    | 4.81    | 0.55    |        | 96.77    | 31.35   | -3.83   |        | 1.74   | 0.55   | -3.88   |        |
| Equatorial Guinea | — | — | — | — | (0.59,  | (2.49,  | (0.51,  | <0.001 | (72.69,  | (24.98, | (-4.28, | <0.001 | (0.04, | (0.04, | (-4.36, | <0.001 |

|          |   |   |   |   |        |        |         |        |          |         |         |        |        |        |         |        |
|----------|---|---|---|---|--------|--------|---------|--------|----------|---------|---------|--------|--------|--------|---------|--------|
|          |   |   |   |   | 14.35) | 8.49)  | 0.60)   |        | 126.53)  | 38.95)  | -3.38)  | 10.50) | 2.62)  | -3.40) |         |        |
|          |   |   |   |   | 7.40)  | 8.31)  | 0.39)   |        | 111.42)  | 82.35)  | -1.01)  | 2.00)  | 1.47)  | -1.02) |         |        |
| Eritrea  | — | — | — | — | (5.08, | (6.77, | (0.35,  | <0.001 | (101.91, | (77.39, | (-1.26, | <0.001 | (0.91, | (0.87, | (-1.29, | <0.001 |
|          |   |   |   |   | 10.46) | 10.11) | 0.44)   |        | 121.61)  | 87.56)  | -0.76)  |        | 3.85)  | 2.33)  | -0.76)  |        |
|          |   |   |   |   | 3.15)  | 3.10)  | -0.06)  |        | 17.80)   | 51.53)  | 3.78)   |        | 0.32)  | 0.94)  | 3.82)   |        |
| Estonia  | — | — | — | — | (1.49, | (1.32, | (-0.10, | 0.011  | (13.40,  | (43.07, | (3.11,  | <0.001 | (0.01, | (0.15, | (3.13,  | <0.001 |
|          |   |   |   |   | 5.95)  | 6.75)  | -0.01)  |        | 23.27)   | 61.54)  | 4.45)   |        | 1.98)  | 3.89)  | 4.52)   |        |
|          |   |   |   |   | 2.04)  | 1.95)  | -0.15)  |        | 55.88)   | 97.72)  | 1.93)   |        | 1.01)  | 1.77)  | 1.92)   |        |
| Eswatini | — | — | — | — | (0.25, | (0.55, | (-0.20, | <0.001 | (42.18,  | (84.99, | (1.62,  | <0.001 | (0.03, | (0.46, | (1.61,  | <0.001 |
|          |   |   |   |   | 7.56)  | 4.96)  | -0.09)  |        | 72.73)   | 111.87) | 2.23)   |        | 5.88)  | 4.69)  | 2.24)   |        |
|          |   |   |   |   | 8.48)  | 9.77)  | 0.50)   |        | 99.70)   | 45.57)  | -2.67)  |        | 1.79)  | 0.80)  | -2.75)  |        |
| Ethiopia | — | — | — | — | (7.81, | (9.30, | (0.48,  | <0.001 | (97.40,  | (44.57, | (-2.77, | <0.001 | (1.49, | (0.67, | (-2.87, | <0.001 |
|          |   |   |   |   | 9.19)  | 10.25) | 0.51)   |        | 102.05)  | 46.58)  | -2.57)  |        | 2.13)  | 0.95)  | -2.63)  |        |
|          |   |   |   |   | 9.69)  | 9.84)  | 0.05)   |        | 107.19)  | 88.81)  | -0.68)  |        | 1.92)  | 1.58)  | -0.71)  |        |
| Fiji     | — | — | — | — | (5.31, | (5.88, | (0.04,  | <0.001 | (91.11,  | (75.84, | (-1.26, | 0.021  | (0.37, | (0.32, | (-1.34, | 0.031  |
|          |   |   |   |   | 16.30) | 15.50) | 0.07)   |        | 125.35)  | 103.40) | -0.11)  |        | 5.91)  | 4.70)  | -0.07)  |        |
|          |   |   |   |   | 3.93)  | 2.37)  | -1.74)  |        | 9.99)    | 10.45)  | 0.10)   |        | 0.18)  | 0.19)  | 0.03)   |        |
| Finland  | — | — | — | — | (2.83, | (1.49, | (-1.84, | <0.001 | (8.18,   | (8.52,  | (-0.51, | 0.752  | (0.02, | (0.02, | (-0.80, | 0.953  |
|          |   |   |   |   | 5.39)  | 3.62)  | -1.63)  |        | 12.13)   | 12.73)  | 0.71)   |        | 0.79)  | 0.82)  | 0.86)   |        |
|          |   |   |   |   | 2.31)  | 1.53)  | -1.41)  |        | 3.27)    | 2.06)   | -1.57)  |        | 0.05)  | 0.03)  | -1.71)  |        |
| France   | — | — | — | — | (2.04, | (1.30, | (-1.50, | <0.001 | (2.95,   | (1.80,  | (-1.87, | <0.001 | (0.02, | (0.01, | (-1.71, | <0.001 |
|          |   |   |   |   | 2.61)  | 1.79)  | -1.32)  |        | 3.62)    | 2.36)   | -1.27)  |        | 0.12)  | 0.09)  | -1.71)  |        |
|          |   |   |   |   | 5.08)  | 5.05)  | -0.02)  |        | 81.88)   | 59.78)  | -1.16)  |        | 1.47)  | 1.06)  | -1.17)  |        |
| Gabon    | — | — | — | — | (2.27, | (2.88, | (-0.05, | 0.320  | (68.92,  | (51.65, | (-1.37, | <0.001 | (0.24, | (0.25, | (-1.37, | <0.001 |
|          |   |   |   |   | 9.83)  | 8.22)  | 0.02)   |        | 96.61)   | 68.85)  | -0.96)  |        | 4.77)  | 2.96)  | -0.98)  |        |
|          |   |   |   |   | 7.82)  | 8.02)  | 0.09)   |        | 37.15)   | 71.77)  | 2.60)   |        | 0.65)  | 1.26)  | 2.62)   |        |
| Gambia   | — | — | — | — | (3.93, | (5.37, | (0.06,  | <0.001 | (28.04,  | (63.50, | (1.95,  | <0.001 | (0.01, | (0.39, | (1.99,  | <0.001 |
|          |   |   |   |   | 14.09) | 11.55) | 0.11)   |        | 48.43)   | 80.85)  | 3.25)   |        | 4.02)  | 3.07)  | 3.26)   |        |
|          |   |   |   |   | 5.54)  | 5.53)  | -0.00)  |        | 24.07)   | 60.30)  | 3.26)   |        | 0.41)  | 1.04)  | 3.28)   |        |
| Georgia  | — | — | — | — | (4.21, | (3.91, | (-0.06, | 0.895  | (21.20,  | (54.44, | (2.33,  | <0.001 | (0.12, | (0.41, | (2.34,  | <0.001 |
|          |   |   |   |   | 7.16)  | 7.69)  | 0.06)   |        | 27.23)   | 66.68)  | 4.19)   |        | 1.04)  | 2.28)  | 4.23)   |        |
|          |   |   |   |   | 4.58)  | 4.26)  | -0.26)  |        | 22.30)   | 8.63)   | -3.28)  |        | 0.39)  | 0.14)  | -3.51)  |        |
| Germany  | — | — | — | — | (4.26, | (3.94, | (-0.32, | <0.001 | (21.58,  | (8.15,  | (-3.88, | <0.001 | (0.30, | (0.09, | (-4.09, | <0.001 |

|               |   |   |   |   |         |        |         |        |          |          |         |        |        |        |         |        |
|---------------|---|---|---|---|---------|--------|---------|--------|----------|----------|---------|--------|--------|--------|---------|--------|
|               |   |   |   |   | 4.92)   | 4.61)  | -0.21)  |        | 23.05)   | 9.12)    | -2.68)  |        | 0.50)  | 0.23)  | -2.94)  |        |
|               |   |   |   |   | 3.70)   | 4.00)  | 0.27)   |        | 29.01)   | 43.50)   | 1.43)   |        | 0.51)  | 0.77)  | 1.45)   |        |
| Ghana         | — | — | — | — | (2.95,  | (3.50, | (0.25,  | <0.001 | (26.88,  | (41.82,  | (1.20,  | <0.001 | (0.26, | (0.56, | (1.18,  | <0.001 |
|               |   |   |   |   | 4.58)   | 4.56)  | 0.30)   |        | 31.27)   | 45.22)   | 1.66)   |        | 0.90)  | 1.03)  | 1.73)   |        |
|               |   |   |   |   | 2.93)   | 2.26)  | -0.89)  |        | 5.57)    | 7.02)    | 0.76)   |        | 0.09)  | 0.12)  | 0.64)   |        |
| Greece        | — | — | — | — | (2.21,  | (1.59, | (-0.94, | <0.001 | (4.57,   | (5.77,   | (0.07,  | 0.032  | (0.01, | (0.01, | (-0.36, | 0.209  |
|               |   |   |   |   | 3.81)   | 3.15)  | -0.85)  |        | 6.74)    | 8.48)    | 1.45)   |        | 0.36)  | 0.50)  | 1.65)   |        |
|               |   |   |   |   | 31.82)  | 24.23) | -0.94)  |        | 36.26)   | 32.39)   | -0.43)  |        | 0.61)  | 0.55)  | -0.41)  |        |
| Greenland     | — | — | — | — | (10.12, | (4.44, | (-1.02, | <0.001 | (12.52,  | (8.00,   | (-0.64, | <0.001 | (0.00, | (0.00, | (-0.84, | 0.062  |
|               |   |   |   |   | 85.82)  | 82.57) | -0.86)  |        | 91.94)   | 94.40)   | -0.21)  |        | 42.61) | 46.20) | 0.02)   |        |
|               |   |   |   |   | 5.69)   | 5.63)  | -0.03)  |        | 59.26)   | 41.93)   | -1.36)  |        | 1.07)  | 0.75)  | -1.39)  |        |
| Grenada       | — | — | — | — | (0.07,  | (0.18, | (-0.06, | 0.011  | (26.36,  | (18.09,  | (-1.82, | <0.001 | (0.00, | (0.00, | (-1.88, | <0.001 |
|               |   |   |   |   | 38.50)  | 31.12) | -0.01)  |        | 115.65)  | 83.41)   | -0.90)  |        | 30.17) | 22.43) | -0.89)  |        |
|               |   |   |   |   | 15.58)  | 16.34) | 0.16)   |        | 118.20)  | 136.73)  | 0.54)   |        | 2.09)  | 2.47)  | 0.60)   |        |
| Guam          | — | — | — | — | (5.17,  | (5.16, | (0.15,  | <0.001 | (84.12,  | (97.77,  | (-0.39, | 0.258  | (0.01, | (0.02, | (-0.32, | 0.204  |
|               |   |   |   |   | 36.48)  | 39.02) | 0.17)   |        | 161.87)  | 186.24)  | 1.47)   |        | 16.08) | 17.76) | 1.52)   |        |
|               |   |   |   |   | 0.47)   | 0.64)  | 1.08)   |        | 25.54)   | 16.60)   | -1.49)  |        | 0.43)  | 0.28)  | -1.52)  |        |
| Guatemala     | — | — | — | — | (0.18,  | (0.41, | (0.98,  | <0.001 | (22.83,  | (15.28,  | (-2.11, | <0.001 | (0.15, | (0.14, | (-2.03, | <0.001 |
|               |   |   |   |   | 1.04)   | 0.96)  | 1.18)   |        | 28.49)   | 18.01)   | -0.87)  |        | 1.00)  | 0.53)  | -1.00)  |        |
|               |   |   |   |   | 7.58)   | 8.32)  | 0.32)   |        | 35.47)   | 69.00)   | 2.38)   |        | 0.62)  | 1.21)  | 2.38)   |        |
| Guinea        | — | — | — | — | (5.83,  | (7.01, | (0.29,  | <0.001 | (31.59,  | (65.22,  | (1.95,  | <0.001 | (0.21, | (0.76, | (2.09,  | <0.001 |
|               |   |   |   |   | 9.70)   | 9.80)  | 0.34)   |        | 39.70)   | 72.95)   | 2.82)   |        | 1.43)  | 1.85)  | 2.67)   |        |
|               |   |   |   |   | 5.93)   | 6.32)  | 0.23)   |        | 65.40)   | 96.13)   | 1.35)   |        | 1.15)  | 1.70)  | 1.39)   |        |
| Guinea-Bissau | — | — | — | — | (2.54,  | (3.83, | (0.17,  | <0.001 | (52.68,  | (85.75,  | (1.18,  | <0.001 | (0.09, | (0.58, | (1.24,  | <0.001 |
|               |   |   |   |   | 11.86)  | 9.86)  | 0.28)   |        | 80.39)   | 107.46)  | 1.52)   |        | 5.00)  | 3.92)  | 1.54)   |        |
|               |   |   |   |   | 7.68)   | 7.57)  | -0.04)  |        | 167.22)  | 199.31)  | 0.65)   |        | 2.98)  | 3.59)  | 0.76)   |        |
| Guyana        | — | — | — | — | (3.80,  | (3.70, | (-0.11, | 0.297  | (146.74, | (176.48, | (0.16,  | 0.009  | (0.85, | (1.16, | (0.17,  | 0.012  |
|               |   |   |   |   | 13.93)  | 13.82) | 0.03)   |        | 189.85)  | 224.31)  | 1.15)   |        | 7.59)  | 8.50)  | 1.35)   |        |
|               |   |   |   |   | 4.50)   | 4.84)  | 0.26)   |        | 66.05)   | 60.50)   | -0.27)  |        | 1.19)  | 1.09)  | -0.28)  |        |
| Haiti         | — | — | — | — | (3.29,  | (3.99, | (0.22,  | <0.001 | (61.16,  | (57.40,  | (-0.49, | 0.018  | (0.62, | (0.71, | (-0.48, | 0.005  |
|               |   |   |   |   | 6.02)   | 5.82)  | 0.29)   |        | 71.24)   | 63.73)   | -0.05)  |        | 2.08)  | 1.61)  | -0.09)  |        |
|               |   |   |   |   | 1.22)   | 1.68)  | 1.11)   |        | 51.15)   | 19.36)   | -3.36)  |        | 0.89)  | 0.34)  | -3.28)  |        |
| Honduras      | — | — | — | — | (0.58,  | (1.15, | (1.01,  | <0.001 | (46.06,  | (17.37,  | (-3.72, | <0.001 | (0.34, | (0.12, | (-3.93, | <0.001 |



|                               |   |   |   |   |         |         |         |        |         |         |         |        |        |        |         |        |
|-------------------------------|---|---|---|---|---------|---------|---------|--------|---------|---------|---------|--------|--------|--------|---------|--------|
|                               |   |   |   |   | 2.32)   | 2.39)   | 1.20)   |        | 56.68)  | 21.53)  | -3.00)  |        | 1.94)  | 0.75)  | -2.62)  |        |
|                               |   |   |   |   | 4.74    | 3.77    | -0.78   |        | 42.17   | 32.04   | -0.92   |        | 0.76   | 0.58   | -0.91   |        |
| Hungary                       | — | — | — | — | (3.86,  | (2.90,  | (-0.85, | <0.001 | (39.43, | (29.38, | (-1.69, | 0.020  | (0.43, | (0.27, | (-1.70, | 0.027  |
|                               |   |   |   |   | 5.79)   | 4.86)   | -0.71)  |        | 45.07)  | 34.92)  | -0.15)  |        | 1.26)  | 1.12)  | -0.10)  |        |
|                               |   |   |   |   | 3.52    | 2.78    | -0.84   |        | 4.72    | 3.25    | -1.30   |        | 0.08   | 0.05   | -1.69   |        |
| Iceland                       | — | — | — | — | (0.40,  | (0.30,  | (-0.94, | <0.001 | (0.80,  | (0.44,  | (-1.61, | <0.001 | (0.00, | (0.00, | (-3.11, | 0.021  |
|                               |   |   |   |   | 13.52)  | 11.85)  | -0.74)  |        | 15.40)  | 12.60)  | -0.98)  |        | 7.64)  | 7.57)  | -0.25)  |        |
|                               |   |   |   |   | 1.61    | 1.65    | 0.09    |        | 21.22   | 16.54   | -0.81   |        | 0.38   | 0.30   | -0.77   |        |
| India                         | — | — | — | — | (1.55,  | (1.61,  | (0.03,  | 0.002  | (20.99, | (16.39, | (-1.45, | 0.014  | (0.35, | (0.28, | (-1.58, | 0.069  |
|                               |   |   |   |   | 1.68)   | 1.70)   | 0.14)   |        | 21.44)  | 16.69)  | -0.16)  |        | 0.41)  | 0.32)  | 0.06)   |        |
|                               |   |   |   |   | 13.92   | 14.69   | 0.19    |        | 56.87   | 46.72   | -0.66   |        | 1.00   | 0.81   | -0.69   |        |
| Indonesia                     | — | — | — | — | (13.53, | (14.37, | (0.15,  | <0.001 | (56.08, | (46.15, | (-0.81, | <0.001 | (0.89, | (0.74, | (-0.86, | <0.001 |
|                               |   |   |   |   | 14.33)  | 15.01)  | 0.23)   |        | 57.68)  | 47.29)  | -0.52)  |        | 1.11)  | 0.89)  | -0.51)  |        |
|                               |   |   |   |   | 23.43   | 23.91   | 0.06    |        | 46.02   | 46.20   | 0.03    |        | 0.77   | 0.76   | -0.05   |        |
| Iran (Islamic<br>Republic of) | — | — | — | — | (22.44, | (23.27, | (0.02,  | 0.001  | (44.67, | (45.25, | (-0.12, | 0.699  | (0.60, | (0.65, | (-0.35, | 0.743  |
|                               |   |   |   |   | 24.46)  | 24.56)  | 0.09)   |        | 47.40)  | 47.17)  | 0.18)   |        | 0.97)  | 0.90)  | 0.25)   |        |
|                               |   |   |   |   | 11.51   | 11.75   | 0.05    |        | 34.05   | 17.63   | -2.27   |        | 0.58   | 0.29   | -2.39   |        |
| Iraq                          | — | — | — | — | (10.26, | (11.01, | (-0.04, | 0.270  | (31.94, | (16.75, | (-2.50, | <0.001 | (0.33, | (0.19, | (-2.60, | <0.001 |
|                               |   |   |   |   | 12.87)  | 12.51)  | 0.14)   |        | 36.27)  | 18.54)  | -2.04)  |        | 0.94)  | 0.43)  | -2.17)  |        |
|                               |   |   |   |   | 1.65    | 1.19    | -1.13   |        | 3.50    | 2.29    | -1.48   |        | 0.06   | 0.04   | -1.51   |        |
| Ireland                       | — | — | — | — | (0.82,  | (0.59,  | (-1.21, | <0.001 | (2.23,  | (1.41,  | (-1.74, | <0.001 | (0.00, | (0.00, | (-2.35, | <0.001 |
|                               |   |   |   |   | 2.97)   | 2.20)   | -1.05)  |        | 5.24)   | 3.56)   | -1.22)  |        | 0.70)  | 0.59)  | -0.67)  |        |
|                               |   |   |   |   | 2.41    | 1.84    | -0.95   |        | 12.15   | 2.26    | -5.61   |        | 0.21   | 0.04   | -5.37   |        |
| Israel                        | — | — | — | — | (1.51,  | (1.25,  | (-1.04, | <0.001 | (10.00, | (1.60,  | (-6.04, | <0.001 | (0.02, | (0.00, | (-6.67, | <0.001 |
|                               |   |   |   |   | 3.66)   | 2.63)   | -0.85)  |        | 14.64)  | 3.12)   | -5.18)  |        | 0.79)  | 0.31)  | -4.05)  |        |
|                               |   |   |   |   | 4.69    | 3.36    | -1.17   |        | 6.20    | 5.64    | -0.37   |        | 0.10   | 0.10   | -0.45   |        |
| Italy                         | — | — | — | — | (4.28,  | (3.00,  | (-1.28, | <0.001 | (5.74,  | (5.16,  | (-0.66, | 0.010  | (0.05, | (0.04, | (-1.14, | 0.206  |
|                               |   |   |   |   | 5.12)   | 3.76)   | -1.06)  |        | 6.70)   | 6.15)   | -0.09)  |        | 0.18)  | 0.19)  | 0.25)   |        |
|                               |   |   |   |   | 7.60    | 7.81    | 0.10    |        | 37.07   | 33.25   | -0.63   |        | 0.64   | 0.58   | -0.59   |        |
| Jamaica                       | — | — | — | — | (5.10,  | (5.66,  | (0.06,  | <0.001 | (31.40, | (28.63, | (-2.42, | 0.497  | (0.11, | (0.13, | (-2.48, | 0.548  |
|                               |   |   |   |   | 10.95)  | 10.53)  | 0.13)   |        | 43.53)  | 38.41)  | 1.19)   |        | 2.11)  | 1.67)  | 1.34)   |        |
|                               |   |   |   |   | 7.72    | 6.82    | -0.41   |        | 9.63    | 3.79    | -3.18   |        | 0.16   | 0.06   | -3.50   |        |
| Japan                         | — | — | — | — | (7.36,  | (6.46,  | (-0.45, | <0.001 | (9.23,  | (3.51,  | (-3.34, | <0.001 | (0.11, | (0.03, | (-4.14, | <0.001 |

|              |   |   |   |   |         |         |         |        |         |         |         |        |        |        |         |        |
|--------------|---|---|---|---|---------|---------|---------|--------|---------|---------|---------|--------|--------|--------|---------|--------|
|              |   |   |   |   | 8.08)   | 7.20)   | -0.38)  |        | 10.04)  | 4.08)   | -3.02)  |        | 0.22)  | 0.11)  | -2.86)  |        |
|              |   |   |   |   | 25.47   | 26.12   | 0.08    |        | 30.81   | 21.86   | -1.15   |        | 0.52   | 0.35   | -1.32   |        |
| Jordan       | — | — | — | — | (21.39, | (24.19, | (0.01,  | 0.023  | (26.35, | (20.09, | (-1.74, | <0.001 | (0.10, | (0.16, | (-1.92, | <0.001 |
|              |   |   |   |   | 30.13)  | 28.18)  | 0.14)   |        | 35.85)  | 23.73)  | -0.56)  |        | 1.63)  | 0.67)  | -0.70)  |        |
|              |   |   |   |   | 2.33    | 2.29    | -0.06   |        | 48.09   | 38.79   | -0.68   |        | 0.86   | 0.70   | -0.65   |        |
| Kazakhstan   | — | — | — | — | (1.84,  | (1.83,  | (-0.20, | 0.442  | (45.76, | (36.81, | (-1.43, | 0.082  | (0.58, | (0.46, | (-1.41, | 0.093  |
|              |   |   |   |   | 2.92)   | 2.84)   | 0.09)   |        | 50.50)  | 40.85)  | 0.09)   |        | 1.24)  | 1.04)  | 0.11)   |        |
|              |   |   |   |   | 11.89   | 11.47   | -0.13   |        | 51.61   | 46.41   | -0.40   |        | 0.91   | 0.81   | -0.43   |        |
| Kenya        | — | — | — | — | (10.71, | (10.78, | (-0.32, | 0.179  | (49.17, | (45.02, | (-0.61, | <0.001 | (0.61, | (0.64, | (-0.58, | <0.001 |
|              |   |   |   |   | 13.16)  | 12.19)  | 0.06)   |        | 54.15)  | 47.83)  | -0.18)  |        | 1.31)  | 1.02)  | -0.27)  |        |
|              |   |   |   |   | 4.64    | 4.90    | 0.19    |        | 146.65  | 139.58  | -0.19   |        | 2.67   | 2.54   | -0.19   |        |
| Kiribati     | — | — | — | — | (0.01,  | (0.15,  | (0.13,  | <0.001 | (87.44, | (94.59, | (-0.33, | 0.010  | (0.00, | (0.00, | (-0.31, | 0.001  |
|              |   |   |   |   | 40.77)  | 26.60)  | 0.24)   |        | 231.78) | 198.83) | -0.04)  |        | 37.19) | 22.46) | -0.07)  |        |
|              |   |   |   |   | 25.41   | 25.91   | 0.06    |        | 50.42   | 29.46   | -1.70   |        | 0.82   | 0.47   | -1.77   |        |
| Kuwait       | — | — | — | — | (21.52, | (23.33, | (0.02,  | 0.001  | (44.43, | (26.34, | (-2.13, | <0.001 | (0.23, | (0.16, | (-2.25, | <0.001 |
|              |   |   |   |   | 30.02)  | 28.82)  | 0.09)   |        | 57.16)  | 32.96)  | -1.26)  |        | 2.38)  | 1.28)  | -1.28)  |        |
|              |   |   |   |   | 1.94    | 1.94    | 0.00    |        | 22.52   | 19.20   | -0.46   |        | 0.40   | 0.34   | -0.49   |        |
| Kyrgyzstan   | — | — | — | — | (1.09,  | (1.25,  | (-0.05, | 0.998  | (19.35, | (16.86, | (-1.37, | 0.320  | (0.09, | (0.10, | (-1.37, | 0.276  |
|              |   |   |   |   | 3.20)   | 2.88)   | 0.05)   |        | 26.07)  | 21.77)  | 0.45)   |        | 1.17)  | 0.86)  | 0.40)   |        |
| Lao People's |   |   |   |   | 7.66    | 8.07    | 0.19    |        | 69.12   | 50.05   | -1.08   |        | 1.23   | 0.88   | -1.11   |        |
| Democratic   | — | — | — | — | (5.63,  | (6.69,  | (0.11,  | <0.001 | (62.79, | (46.54, | (-1.24, | <0.001 | (0.52, | (0.47, | (-1.29, | <0.001 |
| Republic     |   |   |   |   | 10.21)  | 9.67)   | 0.27)   |        | 75.93)  | 53.77)  | -0.92)  |        | 2.48)  | 1.51)  | -0.93)  |        |
|              |   |   |   |   | 0.46    | 0.45    | -0.05   |        | 4.79    | 18.41   | 4.71    |        | 0.09   | 0.34   | 4.69    |        |
| Latvia       | — | — | — | — | (0.07,  | (0.04,  | (-0.17, | 0.453  | (3.06,  | (14.17, | (3.50,  | <0.001 | (0.00, | (0.01, | (3.22,  | <0.001 |
|              |   |   |   |   | 1.62)   | 2.45)   | 0.08)   |        | 7.17)   | 23.80)  | 5.94)   |        | 1.01)  | 2.28)  | 6.18)   |        |
|              |   |   |   |   | 28.95   | 30.80   | 0.20    |        | 70.64   | 60.90   | -0.48   |        | 1.18   | 1.01   | -0.51   |        |
| Lebanon      | — | — | — | — | (24.33, | (27.64, | (0.16,  | <0.001 | (63.57, | (56.31, | (-0.63, | <0.001 | (0.43, | (0.50, | (-0.70, | <0.001 |
|              |   |   |   |   | 34.22)  | 34.25)  | 0.25)   |        | 78.31)  | 65.79)  | -0.33)  |        | 2.62)  | 1.86)  | -0.31)  |        |
|              |   |   |   |   | 1.88    | 1.78    | -0.19   |        | 43.89   | 77.14   | 1.95    |        | 0.79   | 1.39   | 2.08    |        |
| Lesotho      | — | — | — | — | (0.61,  | (0.78,  | (-0.23, | <0.001 | (36.33, | (69.33, | (1.49,  | <0.001 | (0.10, | (0.53, | (1.56,  | <0.001 |
|              |   |   |   |   | 4.45)   | 3.50)   | -0.15)  |        | 52.60)  | 85.60)  | 2.42)   |        | 2.85)  | 2.97)  | 2.59)   |        |
|              |   |   |   |   | 7.54    | 7.88    | 0.15    |        | 42.90   | 69.30   | 1.72    |        | 0.75   | 1.22   | 1.74    |        |
| Liberia      | — | — | — | — | (4.73,  | (6.10,  | (0.10,  | <0.001 | (35.60, | (63.83, | (1.38,  | <0.001 | (0.10, | (0.59, | (1.36,  | <0.001 |

|                  |   |   |   |   |         |         |         |        |          |          |         |        |        |        |         |        |
|------------------|---|---|---|---|---------|---------|---------|--------|----------|----------|---------|--------|--------|--------|---------|--------|
|                  |   |   |   |   | 11.52)  | 10.03)  | 0.21)   |        | 51.32)   | 75.12)   | 2.07)   |        | 2.75)  | 2.23)  | 2.11)   |        |
|                  |   |   |   |   | 20.78   | 22.03   | 0.19    |        | 55.48    | 59.17    | 0.25    |        | 0.91   | 0.99   | 0.33    |        |
| Libya            | — | — | — | — | (17.61, | (19.87, | (0.16,  | <0.001 | (50.44,  | (55.52,  | (-0.57, | 0.558  | (0.37, | (0.57, | (-0.56, | 0.472  |
|                  |   |   |   |   | 24.37)  | 24.37)  | 0.23)   |        | 60.91)   | 63.02)   | 1.07)   |        | 1.90)  | 1.62)  | 1.22)   |        |
|                  |   |   |   |   | 1.24    | 1.17    | -0.18   |        | 14.86    | 28.03    | 2.23    |        | 0.27   | 0.51   | 2.25    |        |
| Lithuania        | — | — | — | — | (0.56,  | (0.40,  | (-0.27, | <0.001 | (12.14,  | (23.45,  | (1.16,  | <0.001 | (0.03, | (0.08, | (1.19,  | <0.001 |
|                  |   |   |   |   | 2.41)   | 2.83)   | -0.10)  |        | 18.02)   | 33.37)   | 3.32)   |        | 1.04)  | 1.91)  | 3.32)   |        |
|                  |   |   |   |   | 2.84    | 2.09    | -1.08   |        | 5.14     | 3.16     | -1.68   |        | 0.09   | 0.05   | -2.10   |        |
| Luxembourg       | — | — | — | — | (0.45,  | (0.36,  | (-1.22, | <0.001 | (1.43,   | (0.82,   | (-2.18, | <0.001 | (0.00, | (0.00, | (-2.53, | <0.001 |
|                  |   |   |   |   | 11.20)  | 7.75)   | -0.93)  |        | 14.52)   | 9.31)    | -1.17)  |        | 7.21)  | 4.79)  | -1.66)  |        |
|                  |   |   |   |   | 9.89    | 10.15   | 0.09    |        | 236.86   | 152.71   | -1.45   |        | 4.23   | 2.72   | -1.46   |        |
| Madagascar       | — | — | — | — | (8.48,  | (9.23,  | (0.07,  | <0.001 | (229.86, | (149.15, | (-1.83, | <0.001 | (3.33, | (2.26, | (-1.85, | <0.001 |
|                  |   |   |   |   | 11.49)  | 11.13)  | 0.12)   |        | 244.02)  | 156.33)  | -1.06)  |        | 5.30)  | 3.25)  | -1.06)  |        |
|                  |   |   |   |   | 8.73    | 8.63    | -0.04   |        | 69.39    | 64.66    | -0.21   |        | 1.23   | 1.14   | -0.23   |        |
| Malawi           | — | — | — | — | (7.22,  | (7.58,  | (-0.07, | 0.006  | (65.11,  | (61.78,  | (-0.40, | 0.026  | (0.72, | (0.79, | (-0.44, | 0.041  |
|                  |   |   |   |   | 10.46)  | 9.79)   | -0.01)  |        | 73.88)   | 67.63)   | -0.03)  |        | 1.98)  | 1.61)  | -0.01)  |        |
|                  |   |   |   |   | 3.61    | 3.69    | 0.08    |        | 16.77    | 12.50    | -1.05   |        | 0.29   | 0.22   | -1.00   |        |
| Malaysia         | — | — | — | — | (3.00,  | (3.27,  | (0.02,  | 0.014  | (15.43,  | (11.71,  | (-1.81, | 0.007  | (0.14, | (0.13, | (-2.05, | 0.064  |
|                  |   |   |   |   | 4.31)   | 4.16)   | 0.14)   |        | 18.20)   | 13.34)   | -0.29)  |        | 0.54)  | 0.36)  | 0.06)   |        |
|                  |   |   |   |   | 4.31    | 4.44    | 0.10    |        | 15.90    | 7.59     | -2.48   |        | 0.28   | 0.13   | -2.54   |        |
| Maldives         | — | — | — | — | (0.20,  | (2.04,  | (0.07,  | <0.001 | (5.06,   | (4.10,   | (-3.24, | <0.001 | (0.00, | (0.00, | (-3.39, | <0.001 |
|                  |   |   |   |   | 22.12)  | 10.32)  | 0.12)   |        | 38.95)   | 14.40)   | -1.71)  |        | 15.15) | 5.14)  | -1.69)  |        |
|                  |   |   |   |   | 7.04    | 7.34    | 0.14    |        | 34.36    | 51.37    | 1.44    |        | 0.60   | 0.90   | 1.45    |        |
| Mali             | — | — | — | — | (5.58,  | (6.37,  | (0.12,  | <0.001 | (31.10,  | (48.84,  | (1.00,  | <0.001 | (0.24, | (0.59, | (1.01,  | <0.001 |
|                  |   |   |   |   | 8.76)   | 8.41)   | 0.16)   |        | 37.88)   | 54.01)   | 1.87)   |        | 1.24)  | 1.31)  | 1.89)   |        |
|                  |   |   |   |   | 4.78    | 3.41    | -1.20   |        | 6.76     | 7.29     | 0.17    |        | 0.11   | 0.12   | 0.43    |        |
| Malta            | — | — | — | — | (1.20,  | (0.66,  | (-1.28, | <0.001 | (2.17,   | (2.59,   | (-0.19, | 0.350  | (0.00, | (0.00, | (-0.24, | 0.206  |
|                  |   |   |   |   | 13.58)  | 12.56)  | -1.12)  |        | 16.49)   | 17.93)   | 0.54)   |        | 6.40)  | 7.95)  | 1.11)   |        |
|                  |   |   |   |   | 8.15    | 8.43    | 0.11    |        | 120.88   | 164.02   | 1.18    |        | 2.14   | 2.97   | 1.31    |        |
| Marshall Islands | — | — | — | — | (0.02,  | (0.24,  | (0.09,  | <0.001 | (55.77,  | (100.46, | (1.06,  | <0.001 | (0.00, | (0.00, | (1.17,  | <0.001 |
|                  |   |   |   |   | 68.02)  | 46.67)  | 0.13)   |        | 229.97)  | 253.26)  | 1.30)   |        | 56.72) | 36.94) | 1.44)   |        |
|                  |   |   |   |   | 8.66    | 9.05    | 0.15    |        | 44.51    | 40.16    | -0.31   |        | 0.78   | 0.70   | -0.33   |        |
| Mauritania       | — | — | — | — | (5.69,  | (6.84,  | (0.13,  | <0.001 | (37.46,  | (35.41,  | (-0.59, | 0.024  | (0.13, | (0.21, | (-0.61, | 0.022  |

|                   |   |   |   |   |         |         |         |        |          |          |         |        |         |        |         |        |
|-------------------|---|---|---|---|---------|---------|---------|--------|----------|----------|---------|--------|---------|--------|---------|--------|
|                   |   |   |   |   | 12.67)  | 11.77)  | 0.17)   |        | 52.53)   | 45.39)   | -0.04)  |        | 2.59)   | 1.75)  | -0.05)  |        |
|                   |   |   |   |   | 10.98   | 10.53   | -0.14   |        | 68.28    | 72.09    | 0.37    |        | 1.21    | 1.27   | 0.32    |        |
| Mauritius         | — | — | — | — | (7.26,  | (6.91,  | (-0.18, | <0.001 | (58.39,  | (61.91,  | (-0.09, | 0.113  | (0.25,  | (0.28, | (-0.23, | 0.256  |
|                   |   |   |   |   | 15.97)  | 15.47)  | -0.09)  |        | 79.39)   | 83.54)   | 0.84)   |        | 3.59)   | 3.76)  | 0.87)   |        |
|                   |   |   |   |   | 0.67    | 0.80    | 0.57    |        | 10.81    | 10.30    | -0.19   |        | 0.19    | 0.18   | -0.20   |        |
| Mexico            | — | — | — | — | (0.55,  | (0.69,  | (0.34,  | <0.001 | (10.29,  | (9.90,   | (-0.69, | 0.456  | (0.12,  | (0.13, | (-0.66, | 0.406  |
|                   |   |   |   |   | 0.81)   | 0.91)   | 0.80)   |        | 11.36)   | 10.71)   | 0.31)   |        | 0.28)   | 0.24)  | 0.27)   |        |
| Micronesia        |   |   |   |   | 8.10    | 8.35    | 0.10    |        | 179.02   | 165.28   | -0.28   |        | 3.26    | 2.97   | -0.33   |        |
| (Federated States | — | — | — | — | (0.52,  | (0.65,  | (0.08,  | <0.001 | (122.02, | (112.62, | (-0.37, | <0.001 | (0.01,  | (0.01, | (-0.44, | <0.001 |
| of)               |   |   |   |   | 36.53)  | 35.51)  | 0.12)   |        | 253.82)  | 234.54)  | -0.19)  |        | 28.22)  | 26.32) | -0.23)  |        |
|                   |   |   |   |   | 2.65    | 1.93    | -1.10   |        | 6.16     | 6.67     | 0.28    |        | 0.10    | 0.12   | 0.73    |        |
| Monaco            | — | — | — | — | (0.00,  | (0.00,  | (-1.14, | <0.001 | (0.00,   | (0.00,   | (0.23,  | <0.001 | (0.00,  | (0.00, | (0.59,  | <0.001 |
|                   |   |   |   |   | 123.67) | 89.91)  | -1.05)  |        | 128.97)  | 98.66)   | 0.34)   |        | 119.97) | 86.47) | 0.86)   |        |
|                   |   |   |   |   | 2.46    | 2.61    | 0.18    |        | 34.79    | 26.57    | -0.91   |        | 0.63    | 0.48   | -0.92   |        |
| Mongolia          | — | — | — | — | (1.07,  | (1.59,  | (0.07,  | 0.002  | (28.82,  | (23.02,  | (-1.42, | <0.001 | (0.08,  | (0.12, | (-1.49, | 0.002  |
|                   |   |   |   |   | 4.90)   | 4.14)   | 0.29)   |        | 41.69)   | 30.57)   | -0.40)  |        | 2.31)   | 1.43)  | -0.34)  |        |
|                   |   |   |   |   | 1.08    | 0.90    | -0.62   |        | 6.69     | 4.13     | -2.12   |        | 0.12    | 0.07   | -2.34   |        |
| Montenegro        | — | — | — | — | (0.07,  | (0.03,  | (-0.73, | <0.001 | (3.02,   | (1.30,   | (-3.86, | 0.019  | (0.00,  | (0.00, | (-3.96, | 0.006  |
|                   |   |   |   |   | 4.92)   | 5.37)   | -0.51)  |        | 12.88)   | 10.17)   | -0.36)  |        | 3.22)   | 3.97)  | -0.68)  |        |
|                   |   |   |   |   | 20.62   | 21.19   | 0.09    |        | 63.74    | 37.65    | -1.75   |        | 1.10    | 0.63   | -1.97   |        |
| Morocco           | — | — | — | — | (19.29, | (20.15, | (0.07,  | <0.001 | (61.43,  | (36.26,  | (-2.02, | <0.001 | (0.81,  | (0.46, | (-2.56, | <0.001 |
|                   |   |   |   |   | 22.02)  | 22.27)  | 0.11)   |        | 66.12)   | 39.08)   | -1.48)  |        | 1.45)   | 0.83)  | -1.38)  |        |
|                   |   |   |   |   | 6.20    | 6.81    | 0.32    |        | 72.08    | 84.60    | 0.59    |        | 1.30    | 1.52   | 0.57    |        |
| Mozambique        | — | — | — | — | (5.08,  | (6.02,  | (0.22,  | <0.001 | (68.15,  | (81.81,  | (0.47,  | <0.001 | (0.82,  | (1.16, | (0.44,  | <0.001 |
|                   |   |   |   |   | 7.49)   | 7.67)   | 0.43)   |        | 76.18)   | 87.46)   | 0.70)   |        | 1.96)   | 1.95)  | 0.71)   |        |
|                   |   |   |   |   | 9.28    | 9.49    | 0.08    |        | 90.68    | 53.38    | -1.83   |        | 1.60    | 0.93   | -1.87   |        |
| Myanmar           | — | — | — | — | (8.59,  | (8.91,  | (0.07,  | <0.001 | (88.53,  | (52.00,  | (-1.94, | <0.001 | (1.32,  | (0.75, | (-1.99, | <0.001 |
|                   |   |   |   |   | 10.02)  | 10.10)  | 0.10)   |        | 92.87)   | 54.80)   | -1.71)  |        | 1.92)   | 1.13)  | -1.74)  |        |
|                   |   |   |   |   | 2.42    | 2.37    | -0.07   |        | 40.75    | 44.40    | 0.32    |        | 0.74    | 0.80   | 0.31    |        |
| Namibia           | — | — | — | — | (0.78,  | (1.16,  | (-0.12, | 0.001  | (32.51,  | (38.42,  | (-0.04, | 0.084  | (0.05,  | (0.19, | (-0.07, | 0.109  |
|                   |   |   |   |   | 5.79)   | 4.34)   | -0.03)  |        | 50.51)   | 51.06)   | 0.69)   |        | 3.28)   | 2.20)  | 0.69)   |        |
|                   |   |   |   |   | 7.18    | 7.34    | 0.06    |        | 153.43   | 162.56   | 0.19    |        | 2.78    | 2.94   | 0.19    |        |
| Nauru             | — | — | — | — | (0.00,  | (0.00,  | (0.02,  | 0.002  | (30.08,  | (38.06,  | (0.08,  | 0.001  | (0.00,  | (0.00, | (0.08,  | <0.001 |

|                          |   |   |   |   |          |          |         |        |          |          |         |        |          |          |         |        |
|--------------------------|---|---|---|---|----------|----------|---------|--------|----------|----------|---------|--------|----------|----------|---------|--------|
|                          |   |   |   |   | 221.90)  | 201.32)  | 0.10)   |        | 464.63)  | 454.03)  | 0.31)   |        | 213.16)  | 192.62)  | 0.30)   |        |
|                          |   |   |   |   | 1.23     | 1.29     | 0.16    |        | 18.03    | 13.23    | -1.06   |        | 0.32     | 0.23     | -1.13   |        |
| Nepal                    | — | — | — | — | (0.87,   | (0.99,   | (0.05,  | 0.004  | (16.56,  | (12.24,  | (-1.20, | <0.001 | (0.15,   | (0.12,   | (-1.50, | <0.001 |
|                          |   |   |   |   | 1.70)    | 1.65)    | 0.26)   |        | 19.60)   | 14.28)   | -0.92)  |        | 0.60)    | 0.42)    | -0.77)  |        |
|                          |   |   |   |   | 1.56     | 1.21     | -0.87   |        | 2.56     | 1.89     | -1.09   |        | 0.04     | 0.03     | -0.97   |        |
| Netherlands              | — | — | — | — | (1.16,   | (0.84,   | (-0.94, | <0.001 | (2.04,   | (1.41,   | (-1.27, | <0.001 | (0.00,   | (0.00,   | (-0.97, | <0.001 |
|                          |   |   |   |   | 2.06)    | 1.71)    | -0.80)  |        | 3.19)    | 2.48)    | -0.92)  |        | 0.22)    | 0.21)    | -0.97)  |        |
|                          |   |   |   |   | 2.05     | 1.57     | -0.92   |        | 6.61     | 3.44     | -2.27   |        | 0.11     | 0.06     | -2.31   |        |
| New Zealand              | — | — | — | — | (1.12,   | (0.78,   | (-1.01, | <0.001 | (4.83,   | (2.20,   | (-2.69, | <0.001 | (0.00,   | (0.00,   | (-2.94, | <0.001 |
|                          |   |   |   |   | 3.44)    | 2.82)    | -0.83)  |        | 8.84)    | 5.12)    | -1.84)  |        | 0.77)    | 0.66)    | -1.68)  |        |
|                          |   |   |   |   | 1.09     | 2.51     | 2.91    |        | 15.10    | 10.16    | -1.56   |        | 0.27     | 0.17     | -1.93   |        |
| Nicaragua                | — | — | — | — | (0.45,   | (1.73,   | (2.82,  | <0.001 | (12.08,  | (8.53,   | (-2.54, | 0.002  | (0.02,   | (0.03,   | (-2.59, | <0.001 |
|                          |   |   |   |   | 2.31)    | 3.52)    | 3.01)   |        | 18.67)   | 12.01)   | -0.57)  |        | 1.21)    | 0.59)    | -1.25)  |        |
|                          |   |   |   |   | 6.83     | 7.25     | 0.21    |        | 33.91    | 43.72    | 0.99    |        | 0.60     | 0.77     | 0.99    |        |
| Niger                    | — | — | — | — | (5.34,   | (6.29,   | (0.19,  | <0.001 | (30.55,  | (41.39,  | (0.67,  | <0.001 | (0.23,   | (0.49,   | (0.68,  | <0.001 |
|                          |   |   |   |   | 8.61)    | 8.30)    | 0.23)   |        | 37.56)   | 46.15)   | 1.30)   |        | 1.29)    | 1.16)    | 1.29)   |        |
|                          |   |   |   |   | 10.92    | 11.32    | 0.14    |        | 41.31    | 42.63    | 0.11    |        | 0.72     | 0.74     | 0.08    |        |
| Nigeria                  | — | — | — | — | (10.39,  | (10.95,  | (0.04,  | 0.009  | (40.28,  | (41.92,  | (-0.13, | 0.367  | (0.59,   | (0.65,   | (-0.15, | 0.493  |
|                          |   |   |   |   | 11.47)   | 11.69)   | 0.25)   |        | 42.36)   | 43.34)   | 0.35)   |        | 0.87)    | 0.84)    | 0.31)   |        |
|                          |   |   |   |   | 9.91     | 10.19    | 0.09    |        | 106.59   | 76.85    | -1.13   |        | 1.92     | 1.36     | -1.19   |        |
| Niue                     | — | — | — | — | (0.00,   | (0.00,   | (0.08,  | <0.001 | (0.02,   | (0.00,   | (-1.37, | <0.001 | (0.00,   | (0.00,   | (-1.46, | <0.001 |
|                          |   |   |   |   | 1051.69) | 1487.00) | 0.11)   |        | 1239.40) | 1613.59) | -0.89)  |        | 1035.21) | 1469.64) | -0.92)  |        |
|                          |   |   |   |   | 3.38     | 2.92     | -0.50   |        | 14.43    | 11.34    | -0.82   |        | 0.25     | 0.20     | -0.66   |        |
| North Macedonia          | — | — | — | — | (1.86,   | (1.59,   | (-0.54, | <0.001 | (11.03,  | (8.43,   | (-1.54, | 0.028  | (0.01,   | (0.00,   | (-1.34, | 0.056  |
|                          |   |   |   |   | 5.66)    | 5.16)    | -0.45)  |        | 18.56)   | 15.11)   | -0.09)  |        | 1.38)    | 1.58)    | 0.02)   |        |
|                          |   |   |   |   | 3.91     | 4.04     | 0.11    |        | 20.34    | 18.23    | -0.34   |        | 0.36     | 0.32     | -0.38   |        |
| Northern Mariana Islands | — | — | — | — | (0.00,   | (0.00,   | (0.07,  | <0.001 | (3.67,   | (0.50,   | (-0.68, | 0.055  | (0.00,   | (0.00,   | (-0.82, | 0.101  |
|                          |   |   |   |   | 49.13)   | 87.15)   | 0.15)   |        | 73.20)   | 110.95)  | 0.01)   |        | 43.75)   | 80.38)   | 0.07)   |        |
|                          |   |   |   |   | 2.13     | 2.01     | -0.21   |        | 4.07     | 1.63     | -3.17   |        | 0.07     | 0.03     | -2.86   |        |
| Norway                   | — | — | — | — | (1.27,   | (1.22,   | (-0.27, | <0.001 | (2.83,   | (0.93,   | (-3.58, | <0.001 | (0.00,   | (0.00,   | (-3.59, | <0.001 |
|                          |   |   |   |   | 3.39)    | 3.15)    | -0.15)  |        | 5.70)    | 2.70)    | -2.77)  |        | 0.63)    | 0.53)    | -2.12)  |        |
|                          |   |   |   |   | 11.67    | 12.63    | 0.27    | <0.001 | 22.66    | 18.50    | -0.66   | <0.001 | 0.39     | 0.31     | -0.74   | 0.014  |
| Oman                     | — | — | — | — |          |          |         |        |          |          |         |        |          |          |         |        |

|                  |   |   |   |   |                |                |                |        |                |                  |                |        |                |                |                |        |
|------------------|---|---|---|---|----------------|----------------|----------------|--------|----------------|------------------|----------------|--------|----------------|----------------|----------------|--------|
|                  |   |   |   |   | (9.01, 14.96)  | (11.20, 14.36) | (0.23, 0.32)   |        | (18.80, 27.16) | (16.49, 20.81)   | (-0.94, -0.39) |        | (0.05, 1.53)   | (0.11, 0.98)   | (-1.33, -0.15) |        |
|                  |   |   |   |   | 1.91           | 1.94           | 0.05           |        | 30.10          | 40.93            | 1.09           |        | 0.54           | 0.73           | 1.07           |        |
| Pakistan         | — | — | — | — | (1.71, 2.14)   | (1.80, 2.08)   | (-0.01, 0.11)  | 0.076  | (29.28, 30.94) | (40.30, 41.56)   | (0.92, 1.25)   | <0.001 | (0.44, 0.66)   | (0.65, 0.82)   | (0.78, 1.35)   | <0.001 |
|                  |   |   |   |   | 1.41           | 1.45           | 0.10           |        | 10.84          | 10.38            | -0.13          |        | 0.19           | 0.19           | -0.19          |        |
| Palau            | — | — | — | — | (0.00, 117.73) | (0.00, 132.93) | (0.04, 0.16)   | 0.001  | (0.00, 135.86) | (0.00, 147.10)   | (-0.23, -0.03) | 0.011  | (0.00, 115.29) | (0.00, 130.93) | (-0.88, 0.50)  | 0.590  |
|                  |   |   |   |   | 14.60          | 15.01          | 0.09           |        | 24.69          | 20.26            | -0.74          |        | 0.41           | 0.33           | -0.81          |        |
| Palestine        | — | — | — | — | (10.41, 20.00) | (12.54, 17.84) | (0.06, 0.13)   | <0.001 | (19.30, 31.22) | (17.43, 23.43)   | (-1.17, -0.32) | 0.001  | (0.02, 2.28)   | (0.07, 1.02)   | (-1.23, -0.38) | <0.001 |
|                  |   |   |   |   | 0.84           | 1.72           | 2.52           |        | 10.66          | 15.75            | 1.44           |        | 0.18           | 0.27           | 1.48           |        |
| Panama           | — | — | — | — | (0.24, 2.22)   | (0.93, 2.91)   | (2.44, 2.60)   | <0.001 | (7.89, 14.14)  | (13.11, 18.76)   | (0.74, 2.15)   | <0.001 | (0.00, 1.24)   | (0.04, 0.95)   | (0.57, 2.39)   | 0.001  |
|                  |   |   |   |   | 8.07           | 8.30           | 0.10           |        | 78.90          | 87.24            | 0.32           |        | 1.43           | 1.57           | 0.29           |        |
| Papua New Guinea | — | — | — | — | (6.10, 10.49)  | (7.04, 9.73)   | (0.08, 0.11)   | <0.001 | (72.46, 85.78) | (83.06, 91.59)   | (0.14, 0.50)   | <0.001 | (0.68, 2.65)   | (1.06, 2.26)   | (0.11, 0.47)   | 0.001  |
|                  |   |   |   |   | 0.98           | 2.06           | 2.58           |        | 17.40          | 20.22            | 0.64           |        | 0.31           | 0.35           | 0.59           |        |
| Paraguay         | — | — | — | — | (0.41, 2.01)   | (1.40, 2.94)   | (2.44, 2.73)   | <0.001 | (14.48, 20.75) | (17.99, 22.65)   | (0.16, 1.13)   | 0.009  | (0.04, 1.08)   | (0.12, 0.82)   | (0.04, 1.15)   | 0.037  |
|                  |   |   |   |   | 1.17           | 2.36           | 2.47           |        | 26.47          | 14.55            | -2.00          |        | 0.45           | 0.24           | -2.01          |        |
| Peru             | — | — | — | — | (0.87, 1.55)   | (2.01, 2.76)   | (2.39, 2.55)   | <0.001 | (24.90, 28.11) | (13.66, 15.49)   | (-2.74, -1.26) | <0.001 | (0.26, 0.72)   | (0.14, 0.39)   | (-2.81, -1.19) | <0.001 |
|                  |   |   |   |   | 12.23          | 12.42          | 0.06           |        | 32.32          | 103.43           | 4.22           |        | 0.57           | 1.85           | 4.30           |        |
| Philippines      | — | — | — | — | (11.58, 12.91) | (11.96, 12.89) | (0.01, 0.11)   | 0.012  | (31.26, 33.39) | (102.10, 104.78) | (3.85, 4.60)   | <0.001 | (0.43, 0.73)   | (1.67, 2.04)   | (3.93, 4.67)   | <0.001 |
|                  |   |   |   |   | 3.91           | 4.00           | 0.10           |        | 17.64          | 12.92            | -1.13          |        | 0.32           | 0.23           | -1.14          |        |
| Poland           | — | — | — | — | (3.50, 4.36)   | (3.58, 4.48)   | (0.05, 0.14)   | <0.001 | (16.75, 18.57) | (12.14, 13.75)   | (-1.59, -0.66) | <0.001 | (0.21, 0.47)   | (0.14, 0.38)   | (-1.80, -0.48) | 0.001  |
|                  |   |   |   |   | 1.75           | 1.27           | -1.11          |        | 4.44           | 2.25             | -2.33          |        | 0.07           | 0.04           | -1.88          |        |
| Portugal         | — | — | — | — | (1.20, 2.47)   | (0.79, 1.97)   | (-1.16, -1.05) | <0.001 | (3.53, 5.51)   | (1.59, 3.13)     | (-2.82, -1.84) | <0.001 | (0.00, 0.34)   | (0.00, 0.34)   | (-3.55, -0.18) | 0.030  |
| Puerto Rico      | — | — | — | — | 8.69           | 8.53           | -0.05          | 0.362  | 51.54          | 59.17            | 0.58           | 0.097  | 0.92           | 1.05           | 0.56           | 0.120  |

|                                     |   |   |   |   |         |         |         |        |          |         |         |        |        |        |         |        |
|-------------------------------------|---|---|---|---|---------|---------|---------|--------|----------|---------|---------|--------|--------|--------|---------|--------|
|                                     |   |   |   |   | (6.56,  | (6.29,  | (-0.17, |        | (46.14,  | (53.00, | (-0.11, |        | (0.33, | (0.39, | (-0.15, |        |
|                                     |   |   |   |   | 11.30)  | 11.32)  | 0.06)   |        | 57.39)   | 65.88)  | 1.27)   |        | 2.01)  | 2.32)  | 1.28)   |        |
|                                     |   |   |   |   | 10.55   | 7.25    | -1.33   |        | 10.57    | 4.81    | -2.61   |        | 0.17   | 0.07   | -2.97   |        |
| Qatar                               | — | — | — | — | (6.71,  | (6.01,  | (-1.51, | <0.001 | (6.29,   | (3.65,  | (-3.18, | <0.001 | (0.00, | (0.00, | (-3.60, | <0.001 |
|                                     |   |   |   |   | 17.54)  | 9.11)   | -1.16)  |        | 18.14)   | 6.65)   | -2.05)  |        | 5.34)  | 1.32)  | -2.34)  |        |
|                                     |   |   |   |   | 12.77   | 11.48   | -0.37   |        | 64.81    | 6.14    | -7.83   |        | 1.07   | 0.09   | -8.16   |        |
| Republic of Korea                   | — | — | — | — | (12.09, | (10.85, | (-0.46, | <0.001 | (63.28,  | (5.66,  | (-8.37, | <0.001 | (0.88, | (0.04, | (-9.00, | <0.001 |
|                                     |   |   |   |   | 13.48)  | 12.15)  | -0.29)  |        | 66.37)   | 6.65)   | -7.29)  |        | 1.28)  | 0.18)  | -7.32)  |        |
|                                     |   |   |   |   | 1.51    | 1.54    | 0.06    |        | 8.47     | 20.81   | 3.03    |        | 0.15   | 0.37   | 2.98    |        |
| Republic of<br>Moldova              | — | — | — | — | (0.83,  | (0.81,  | (-0.03, | 0.211  | (6.70,   | (17.74, | (2.21,  | <0.001 | (0.01, | (0.08, | (2.22,  | <0.001 |
|                                     |   |   |   |   | 2.58)   | 2.82)   | 0.14)   |        | 10.61)   | 24.36)  | 3.86)   |        | 0.76)  | 1.33)  | 3.74)   |        |
|                                     |   |   |   |   | 3.57    | 3.49    | -0.09   |        | 23.48    | 20.75   | -0.47   |        | 0.42   | 0.37   | -0.49   |        |
| Romania                             | — | — | — | — | (3.04,  | (2.89,  | (-0.16, | 0.008  | (22.09,  | (19.22, | (-1.62, | 0.431  | (0.25, | (0.19, | (-1.82, | 0.475  |
|                                     |   |   |   |   | 4.17)   | 4.20)   | -0.02)  |        | 24.95)   | 22.39)  | 0.70)   |        | 0.67)  | 0.66)  | 0.86)   |        |
|                                     |   |   |   |   | 0.70    | 0.70    | 0.03    |        | 19.90    | 23.45   | 0.73    |        | 0.36   | 0.42   | 0.68    |        |
| Russian Federation                  | — | — | — | — | (0.61,  | (0.61,  | (-0.12, | 0.729  | (19.42,  | (22.90, | (-0.52, | 0.254  | (0.30, | (0.35, | (-0.62, | 0.307  |
|                                     |   |   |   |   | 0.80)   | 0.81)   | 0.17)   |        | 20.39)   | 24.01)  | 1.99)   |        | 0.43)  | 0.51)  | 2.00)   |        |
|                                     |   |   |   |   | 8.36    | 9.10    | 0.30    |        | 116.23   | 50.28   | -2.88   |        | 2.08   | 0.89   | -2.93   |        |
| Rwanda                              | — | — | — | — | (6.75,  | (7.92,  | (0.26,  | <0.001 | (110.07, | (47.48, | (-3.04, | <0.001 | (1.33, | (0.55, | (-3.09, | <0.001 |
|                                     |   |   |   |   | 10.24)  | 10.41)  | 0.34)   |        | 122.66)  | 53.21)  | -2.72)  |        | 3.12)  | 1.36)  | -2.76)  |        |
|                                     |   |   |   |   | 5.71    | 5.69    | -0.01   |        | 68.52    | 34.96   | -2.09   |        | 1.25   | 0.62   | -2.16   |        |
| Saint Kitts and<br>Nevis            | — | — | — | — | (0.00,  | (0.04,  | (-0.04, | 0.799  | (22.79,  | (9.94,  | (-3.99, | 0.034  | (0.00, | (0.00, | (-4.13, | 0.036  |
|                                     |   |   |   |   | 63.16)  | 46.41)  | 0.03)   |        | 159.62)  | 90.93)  | -0.16)  |        | 54.80) | 37.65) | -0.14)  |        |
|                                     |   |   |   |   | 5.68    | 5.67    | 0.00    |        | 57.47    | 46.43   | -0.70   |        | 1.04   | 0.83   | -0.72   |        |
| Saint Lucia                         | — | — | — | — | (0.24,  | (0.69,  | (-0.08, | 0.959  | (29.90,  | (26.66, | (-1.16, | 0.003  | (0.00, | (0.00, | (-1.23, | 0.005  |
|                                     |   |   |   |   | 29.43)  | 21.37)  | 0.08)   |        | 100.81)  | 75.66)  | -0.24)  |        | 21.37) | 13.34) | -0.21)  |        |
|                                     |   |   |   |   | 9.00    | 8.81    | -0.07   |        | 78.57    | 75.24   | 0.00    |        | 1.41   | 1.34   | -0.00   |        |
| Saint Vincent and<br>the Grenadines | — | — | — | — | (0.77,  | (0.94,  | (-0.09, | <0.001 | (43.33,  | (42.90, | (-0.59, | 0.990  | (0.00, | (0.00, | (-0.62, | 0.990  |
|                                     |   |   |   |   | 38.73)  | 33.81)  | -0.06)  |        | 132.40)  | 122.80) | 0.60)   |        | 26.01) | 21.04) | 0.62)   |        |
|                                     |   |   |   |   | 11.23   | 11.28   | 0.01    |        | 94.94    | 96.49   | 0.07    |        | 1.71   | 1.73   | 0.05    |        |
| Samoa                               | — | — | — | — | (2.12,  | (3.04,  | (0.00,  | 0.029  | (60.68,  | (66.96, | (-0.10, | 0.430  | (0.00, | (0.01, | (-0.16, | 0.648  |
|                                     |   |   |   |   | 35.23)  | 29.36)  | 0.03)   |        | 142.34)  | 134.88) | 0.24)   |        | 19.93) | 14.38) | 0.26)   |        |
| San Marino                          | — | — | — | — | 3.50    | 2.59    | -1.05   | <0.001 | 3.71     | 4.70    | 0.82    | <0.001 | 0.06   | 0.08   | 0.84    | 0.012  |

|                          |   |   |   |   |         |         |         |        |         |          |         |        |        |        |         |        |
|--------------------------|---|---|---|---|---------|---------|---------|--------|---------|----------|---------|--------|--------|--------|---------|--------|
|                          |   |   |   |   | (0.00,  | (0.00,  | (-1.13, |        | (0.00,  | (0.00,   | (0.68,  |        | (0.00, | (0.00, | (0.18,  |        |
|                          |   |   |   |   | 92.72)  | 83.41)  | -0.98)  |        | 93.13)  | 87.44)   | 0.97)   |        | 85.90) | 78.50) | 1.50)   |        |
|                          |   |   |   |   | 8.80    | 9.24    | 0.17    |        | 22.88   | 21.31    | -0.28   |        | 0.40   | 0.36   | -0.50   |        |
| Sao Tome and<br>Principe | — | — | — | — | (0.41,  | (2.30,  | (0.15,  | <0.001 | (5.18,  | (9.52,   | (-1.21, | 0.555  | (0.00, | (0.00, | (-1.54, | 0.359  |
|                          |   |   |   |   | 45.21)  | 24.91)  | 0.18)   |        | 66.59)  | 41.34)   | 0.66)   |        | 30.64) | 10.44) | 0.56)   |        |
|                          |   |   |   |   | 4.90    | 5.34    | 0.30    |        | 8.27    | 10.26    | 0.74    |        | 0.14   | 0.17   | 0.79    |        |
| Saudi Arabia             | — | — | — | — | (4.20,  | (4.96,  | (0.28,  | <0.001 | (7.36,  | (9.70,   | (0.52,  | <0.001 | (0.04, | (0.11, | (0.37,  | <0.001 |
|                          |   |   |   |   | 5.69)   | 5.76)   | 0.32)   |        | 9.26)   | 10.85)   | 0.96)   |        | 0.33)  | 0.27)  | 1.22)   |        |
|                          |   |   |   |   | 8.93    | 8.87    | -0.03   |        | 36.62   | 57.37    | 1.67    |        | 0.64   | 1.01   | 1.71    |        |
| Senegal                  | — | — | — | — | (7.17,  | (7.72,  | (-0.09, | 0.318  | (33.04, | (54.44,  | (0.50,  | 0.005  | (0.25, | (0.65, | (0.47,  | 0.007  |
|                          |   |   |   |   | 11.00)  | 10.15)  | 0.03)   |        | 40.50)  | 60.42)   | 2.86)   |        | 1.37)  | 1.49)  | 2.96)   |        |
|                          |   |   |   |   | 2.47    | 1.76    | -1.17   |        | 12.69   | 7.07     | -2.07   |        | 0.22   | 0.12   | -2.03   |        |
| Serbia                   | — | — | — | — | (1.82,  | (1.17,  | (-1.25, | <0.001 | (11.12, | (5.82,   | (-2.49, | <0.001 | (0.06, | (0.01, | (-2.46, | <0.001 |
|                          |   |   |   |   | 3.31)   | 2.57)   | -1.10)  |        | 14.44)  | 8.53)    | -1.65)  |        | 0.58)  | 0.50)  | -1.59)  |        |
|                          |   |   |   |   | 13.24   | 13.22   | 0.01    |        | 151.94  | 99.28    | -1.25   |        | 2.71   | 1.73   | -1.33   |        |
| Seychelles               | — | — | — | — | (1.40,  | (2.96,  | (-0.01, | 0.463  | (94.51, | (63.14,  | (-2.06, | 0.003  | (0.00, | (0.00, | (-2.11, | 0.001  |
|                          |   |   |   |   | 52.30)  | 42.17)  | 0.03)   |        | 232.80) | 151.49)  | -0.43)  |        | 34.78) | 25.45) | -0.54)  |        |
|                          |   |   |   |   | 7.63    | 7.66    | 0.01    |        | 33.32   | 52.67    | 1.59    |        | 0.58   | 0.92   | 1.58    |        |
| Sierra Leone             | — | — | — | — | (5.50,  | (6.26,  | (-0.02, | 0.649  | (28.74, | (48.98,  | (1.28,  | <0.001 | (0.13, | (0.49, | (1.30,  | <0.001 |
|                          |   |   |   |   | 10.34)  | 9.28)   | 0.03)   |        | 38.44)  | 56.56)   | 1.90)   |        | 1.66)  | 1.59)  | 1.87)   |        |
|                          |   |   |   |   | 15.81   | 12.14   | -0.91   |        | 26.71   | 26.54    | -0.07   |        | 0.46   | 0.46   | -0.04   |        |
| Singapore                | — | — | — | — | (13.14, | (10.44, | (-0.97, | <0.001 | (23.20, | (23.92,  | (-0.76, | 0.833  | (0.11, | (0.18, | (-0.73, | 0.915  |
|                          |   |   |   |   | 18.90)  | 14.16)  | -0.84)  |        | 30.62)  | 29.47)   | 0.62)   |        | 1.28)  | 1.17)  | 0.66)   |        |
|                          |   |   |   |   | 4.22    | 3.54    | -0.60   |        | 17.33   | 19.08    | 0.38    |        | 0.31   | 0.34   | 0.34    |        |
| Slovakia                 | — | — | — | — | (3.11,  | (2.53,  | (-0.67, | <0.001 | (14.99, | (16.59,  | (-0.61, | 0.459  | (0.07, | (0.09, | (-0.69, | 0.517  |
|                          |   |   |   |   | 5.63)   | 4.92)   | -0.54)  |        | 19.97)  | 21.93)   | 1.37)   |        | 0.89)  | 1.06)  | 1.38)   |        |
|                          |   |   |   |   | 4.04    | 2.90    | -1.15   |        | 10.73   | 5.92     | -2.10   |        | 0.19   | 0.10   | -2.14   |        |
| Slovenia                 | — | — | — | — | (2.38,  | (1.45,  | (-1.24, | <0.001 | (7.86,  | (3.71,   | (-2.97, | <0.001 | (0.00, | (0.00, | (-3.12, | <0.001 |
|                          |   |   |   |   | 6.52)   | 5.55)   | -1.07)  |        | 14.40)  | 9.28)    | -1.21)  |        | 1.42)  | 1.85)  | -1.14)  |        |
|                          |   |   |   |   | 5.22    | 5.43    | 0.14    |        | 124.86  | 138.99   | 0.34    |        | 2.29   | 2.54   | 0.33    |        |
| Solomon Islands          | — | — | — | — | (0.87,  | (2.04,  | (0.10,  | <0.001 | (95.34, | (118.28, | (0.24,  | <0.001 | (0.08, | (0.51, | (0.23,  | <0.001 |
|                          |   |   |   |   | 17.05)  | 11.71)  | 0.18)   |        | 160.86) | 162.31)  | 0.44)   |        | 12.41) | 7.59)  | 0.44)   |        |
| Somalia                  | — | — | — | — | 8.29    | 8.42    | 0.06    | <0.001 | 120.25  | 82.72    | -1.27   | <0.001 | 2.16   | 1.47   | -1.31   | <0.001 |



|                               |   |   |   |   |                   |                   |                   |        |                     |                   |                   |        |                 |                 |                   |        |
|-------------------------------|---|---|---|---|-------------------|-------------------|-------------------|--------|---------------------|-------------------|-------------------|--------|-----------------|-----------------|-------------------|--------|
|                               |   |   |   |   | (6.69,<br>10.17)  | (7.44,<br>9.49)   | (0.03,<br>0.08)   |        | (113.93,<br>126.85) | (79.63,<br>85.90) | (-1.47,<br>-1.06) |        | (1.39,<br>3.23) | (1.08,<br>1.96) | (-1.52,<br>-1.11) |        |
|                               |   |   |   |   | 4.14              | 3.83              | -0.28             |        | 96.85               | 59.45             | -1.81             |        | 1.77            | 1.07            | -1.87             |        |
| South Africa                  | — | — | — | — | (3.66,<br>4.66)   | (3.50,<br>4.19)   | (-0.33,<br>-0.23) | <0.001 | (94.49,<br>99.26)   | (58.12,<br>60.81) | (-3.13,<br>-0.48) | 0.008  | (1.46,<br>2.12) | (0.90,<br>1.27) | (-3.27,<br>-0.45) | 0.010  |
|                               |   |   |   |   | 10.32             | 10.39             | 0.03              |        | 70.84               | 45.39             | -1.44             |        | 1.27            | 0.80            | -1.48             |        |
| South Sudan                   | — | — | — | — | (8.33,<br>12.67)  | (8.65,<br>12.38)  | (-0.08,<br>0.14)  | 0.598  | (65.52,<br>76.50)   | (41.71,<br>49.33) | (-1.75,<br>-1.12) | <0.001 | (0.64,<br>2.26) | (0.38,<br>1.49) | (-1.79,<br>-1.17) | <0.001 |
|                               |   |   |   |   | 1.93              | 1.37              | -1.19             |        | 3.88                | 3.16              | -0.77             |        | 0.06            | 0.05            | -1.38             |        |
| Spain                         | — | — | — | — | (1.62,<br>2.28)   | (1.12,<br>1.67)   | (-1.25,<br>-1.12) | <0.001 | (3.44,<br>4.36)     | (2.76,<br>3.60)   | (-1.11,<br>-0.44) | <0.001 | (0.02,<br>0.16) | (0.01,<br>0.15) | (-1.65,<br>-1.11) | <0.001 |
|                               |   |   |   |   | 7.25              | 7.29              | 0.02              |        | 57.20               | 31.01             | -2.04             |        | 1.00            | 0.54            | -2.05             |        |
| Sri Lanka                     | — | — | — | — | (6.38,<br>8.20)   | (6.49,<br>8.17)   | (-0.00,<br>0.04)  | 0.118  | (54.74,<br>59.75)   | (29.31,<br>32.79) | (-3.44,<br>-0.62) | 0.005  | (0.69,<br>1.39) | (0.34,<br>0.82) | (-3.42,<br>-0.67) | 0.004  |
|                               |   |   |   |   | 18.07             | 20.07             | 0.33              |        | 85.92               | 80.52             | -0.26             |        | 1.50            | 1.39            | -0.30             |        |
| Sudan                         | — | — | — | — | (16.56,<br>19.68) | (19.03,<br>21.16) | (0.13,<br>0.53)   | 0.001  | (82.67,<br>89.27)   | (78.46,<br>82.62) | (-0.49,<br>-0.04) | 0.022  | (1.09,<br>2.01) | (1.13,<br>1.69) | (-0.52,<br>-0.08) | 0.007  |
|                               |   |   |   |   | 6.72              | 7.03              | 0.16              |        | 66.62               | 65.59             | -0.21             |        | 1.19            | 1.17            | -0.39             |        |
| Suriname                      | — | — | — | — | (1.95,<br>17.14)  | (2.92,<br>14.27)  | (0.13,<br>0.20)   | <0.001 | (48.27,<br>89.99)   | (51.10,<br>82.97) | (-2.02,<br>1.63)  | 0.822  | (0.01,<br>8.75) | (0.06,<br>5.78) | (-0.98,<br>0.20)  | 0.197  |
|                               |   |   |   |   | 3.32              | 2.10              | -1.53             |        | 2.57                | 2.55              | -0.05             |        | 0.04            | 0.04            | -0.28             |        |
| Sweden                        | — | — | — | — | (2.49,<br>4.36)   | (1.49,<br>2.91)   | (-1.62,<br>-1.43) | <0.001 | (1.84,<br>3.51)     | (1.86,<br>3.44)   | (-0.33,<br>0.24)  | 0.755  | (0.00,<br>0.35) | (0.00,<br>0.35) | (-1.64,<br>1.09)  | 0.683  |
|                               |   |   |   |   | 2.00              | 1.36              | -1.33             |        | 2.49                | 1.75              | -1.26             |        | 0.04            | 0.03            | -0.93             |        |
| Switzerland                   | — | — | — | — | (1.34,<br>2.91)   | (0.85,<br>2.11)   | (-1.46,<br>-1.20) | <0.001 | (1.73,<br>3.51)     | (1.15,<br>2.60)   | (-1.58,<br>-0.94) | <0.001 | (0.00,<br>0.44) | (0.00,<br>0.41) | (-2.38,<br>0.54)  | 0.213  |
|                               |   |   |   |   | 5.43              | 5.85              | 0.25              |        | 26.30               | 14.04             | -2.14             |        | 0.45            | 0.23            | -2.20             |        |
| Syrian Arab<br>Republic       | — | — | — | — | (4.41,<br>6.63)   | (4.80,<br>7.10)   | (0.22,<br>0.28)   | <0.001 | (24.11,<br>28.65)   | (12.43,<br>15.83) | (-2.51,<br>-1.77) | <0.001 | (0.20,<br>0.87) | (0.07,<br>0.63) | (-2.60,<br>-1.80) | <0.001 |
|                               |   |   |   |   | 6.09              | 8.11              | 0.98              |        | 19.67               | 17.34             | -0.43             |        | 0.35            | 0.31            | -0.46             |        |
| Taiwan (Province<br>of China) | — | — | — | — | (5.42,<br>6.83)   | (7.33,<br>8.96)   | (0.88,<br>1.09)   | <0.001 | (18.44,<br>20.96)   | (16.18,<br>18.56) | (-1.11,<br>0.25)  | 0.214  | (0.20,<br>0.56) | (0.17,<br>0.53) | (-1.28,<br>0.36)  | 0.270  |
|                               |   |   |   |   | 7.32              | 7.27              | -0.02             | 0.154  | 61.00               | 59.50             | -0.05             | 0.859  | 1.13            | 1.10            | -0.04             | 0.879  |

|                     |   |   |   |   |          |          |         |        |          |          |         |        |          |          |         |        |
|---------------------|---|---|---|---|----------|----------|---------|--------|----------|----------|---------|--------|----------|----------|---------|--------|
|                     |   |   |   |   | (5.55,   | (6.08,   | (-0.06, |        | (55.66,  | (56.03,  | (-0.59, |        | (0.51,   | (0.67,   | (-0.51, |        |
|                     |   |   |   |   | 9.49)    | 8.61)    | 0.01)   |        | 66.72)   | 63.13)   | 0.50)   |        | 2.17)    | 1.70)    | 0.44)   |        |
|                     |   |   |   |   | 2.94     | 3.03     | 0.11    |        | 11.65    | 12.89    | 0.52    |        | 0.20     | 0.22     | 0.54    |        |
| Thailand            | — | — | — | — | (2.63,   | (2.75,   | (0.06,  | <0.001 | (11.04,  | (12.28,  | (-0.57, | 0.350  | (0.13,   | (0.15,   | (-0.84, | 0.445  |
|                     |   |   |   |   | 3.27)    | 3.34)    | 0.16)   |        | 12.28)   | 13.53)   | 1.63)   |        | 0.30)    | 0.32)    | 1.94)   |        |
|                     |   |   |   |   | 9.13     | 9.85     | 0.26    |        | 34.85    | 40.42    | 0.55    |        | 0.61     | 0.71     | 0.53    |        |
| Timor-Leste         | — | — | — | — | (4.82,   | (5.88,   | (0.24,  | <0.001 | (25.85,  | (32.07,  | (-0.02, | 0.060  | (0.01,   | (0.04,   | (-0.04, | 0.070  |
|                     |   |   |   |   | 15.80)   | 15.57)   | 0.27)   |        | 46.07)   | 50.40)   | 1.13)   |        | 3.98)    | 3.39)    | 1.12)   |        |
|                     |   |   |   |   | 7.29     | 7.34     | 0.03    |        | 38.28    | 63.91    | 1.88    |        | 0.67     | 1.13     | 1.92    |        |
| Togo                | — | — | — | — | (5.07,   | (5.93,   | (-0.00, | 0.059  | (33.07,  | (59.66,  | (1.46,  | <0.001 | (0.15,   | (0.63,   | (1.47,  | <0.001 |
|                     |   |   |   |   | 10.17)   | 8.98)    | 0.06)   |        | 44.12)   | 68.39)   | 2.30)   |        | 1.93)    | 1.88)    | 2.37)   |        |
|                     |   |   |   |   | 11.01    | 11.67    | 0.19    |        | 76.59    | 75.08    | -0.07   |        | 1.38     | 1.34     | -0.09   |        |
| Tokelau             | — | — | — | — | (0.00,   | (0.00,   | (0.17,  | <0.001 | (0.00,   | (0.00,   | (-0.14, | 0.037  | (0.00,   | (0.00,   | (-0.16, | 0.011  |
|                     |   |   |   |   | 1605.80) | 1821.68) | 0.22)   |        | 1732.60) | 1937.79) | -0.00)  |        | 1586.54) | 1802.33) | -0.02)  |        |
|                     |   |   |   |   | 6.95     | 7.04     | 0.05    |        | 23.28    | 25.58    | 0.33    |        | 0.41     | 0.45     | 0.28    |        |
| Tonga               | — | — | — | — | (0.10,   | (0.24,   | (0.02,  | <0.001 | (4.56,   | (7.11,   | (0.20,  | <0.001 | (0.00,   | (0.00,   | (0.05,  | 0.020  |
|                     |   |   |   |   | 46.55)   | 37.44)   | 0.07)   |        | 72.17)   | 65.64)   | 0.45)   |        | 34.94)   | 25.40)   | 0.52)   |        |
|                     |   |   |   |   | 6.89     | 6.64     | -0.10   |        | 80.54    | 50.97    | -1.56   |        | 1.45     | 0.91     | -1.59   |        |
| Trinidad and Tobago | — | — | — | — | (3.95,   | (4.06,   | (-0.18, | 0.005  | (69.51,  | (43.21,  | (-2.10, | <0.001 | (0.34,   | (0.17,   | (-2.21, | <0.001 |
|                     |   |   |   |   | 11.19)   | 10.47)   | -0.03)  |        | 92.85)   | 59.91)   | -1.02)  |        | 4.04)    | 3.15)    | -0.96)  |        |
|                     |   |   |   |   | 20.60    | 21.43    | 0.14    |        | 37.75    | 34.25    | -0.34   |        | 0.63     | 0.57     | -0.35   |        |
| Tunisia             | — | — | — | — | (18.31,  | (19.63,  | (0.09,  | <0.001 | (34.69,  | (31.93,  | (-0.44, | <0.001 | (0.29,   | (0.31,   | (-0.45, | <0.001 |
|                     |   |   |   |   | 23.11)   | 23.35)   | 0.19)   |        | 41.02)   | 36.71)   | -0.24)  |        | 1.21)    | 0.98)    | -0.25)  |        |
|                     |   |   |   |   | 13.15    | 10.09    | -0.92   |        | 25.44    | 8.94     | -3.59   |        | 0.43     | 0.14     | -3.80   |        |
| Turkey              | — | — | — | — | (12.48,  | (9.64,   | (-0.99, | <0.001 | (24.52,  | (8.51,   | (-4.00, | <0.001 | (0.32,   | (0.09,   | (-4.55, | <0.001 |
|                     |   |   |   |   | 13.85)   | 10.56)   | -0.85)  |        | 26.39)   | 9.38)    | -3.17)  |        | 0.57)    | 0.21)    | -3.05)  |        |
|                     |   |   |   |   | 6.79     | 7.03     | 0.13    |        | 24.61    | 29.94    | 0.74    |        | 0.43     | 0.52     | 0.71    |        |
| Turkmenistan        | — | — | — | — | (4.90,   | (5.56,   | (0.05,  | 0.001  | (20.92,  | (26.79,  | (0.16,  | 0.012  | (0.08,   | (0.18,   | (0.15,  | 0.013  |
|                     |   |   |   |   | 9.19)    | 8.79)    | 0.20)   |        | 28.79)   | 33.37)   | 1.32)   |        | 1.37)    | 1.18)    | 1.27)   |        |
|                     |   |   |   |   | 8.73     | 9.13     | 0.14    |        | 115.59   | 125.72   | 0.31    |        | 2.09     | 2.27     | 0.30    |        |
| Tuvalu              | — | — | — | — | (0.00,   | (0.00,   | (0.10,  | <0.001 | (11.81,  | (25.47,  | (0.23,  | <0.001 | (0.00,   | (0.00,   | (0.22,  | <0.001 |
|                     |   |   |   |   | 264.01)  | 183.42)  | 0.18)   |        | 449.63)  | 375.30)  | 0.39)   |        | 250.75)  | 169.94)  | 0.39)   |        |

|                                          |   |   |   |   |         |         |         |        |         |          |         |        |        |        |         |        |
|------------------------------------------|---|---|---|---|---------|---------|---------|--------|---------|----------|---------|--------|--------|--------|---------|--------|
|                                          |   |   |   |   | 8.61    | 8.48    | -0.06   |        | 63.73   | 59.15    | -0.29   |        | 1.14   | 1.05   | -0.33   |        |
| Uganda                                   | — | — | — | — | (7.44,  | (7.73,  | (-0.10, | 0.001  | (60.51, | (57.18,  | (-0.59, | 0.063  | (0.74, | (0.80, | (-0.61, | 0.022  |
|                                          |   |   |   |   | 9.92)   | 9.28)   | -0.03)  |        | 67.08)  | 61.16)   | 0.02)   |        | 1.68)  | 1.35)  | -0.05)  |        |
|                                          |   |   |   |   | 0.33    | 0.32    | -0.09   |        | 5.67    | 12.59    | 2.69    |        | 0.10   | 0.23   | 2.75    |        |
| Ukraine                                  | — | — | — | — | (0.23,  | (0.21,  | (-0.20, | 0.148  | (5.22,  | (11.86,  | (0.75,  | 0.006  | (0.05, | (0.14, | (-0.03, | 0.053  |
|                                          |   |   |   |   | 0.47)   | 0.47)   | 0.03)   |        | 6.15)   | 13.37)   | 4.67)   |        | 0.19)  | 0.37)  | 5.61)   |        |
|                                          |   |   |   |   | 27.90   | 28.75   | 0.09    |        | 71.41   | 96.90    | 1.03    |        | 1.20   | 1.67   | 1.12    |        |
| United Arab<br>Emirates                  | — | — | — | — | (24.47, | (27.04, | (0.06,  | <0.001 | (65.13, | (93.14,  | (0.59,  | <0.001 | (0.53, | (1.23, | (0.91,  | <0.001 |
|                                          |   |   |   |   | 31.95)  | 30.64)  | 0.12)   |        | 78.36)  | 100.86)  | 1.48)   |        | 2.76)  | 2.37)  | 1.32)   |        |
|                                          |   |   |   |   | 2.97    | 3.77    | 0.87    |        | 6.98    | 9.93     | 1.20    |        | 0.12   | 0.17   | 1.19    |        |
| United Kingdom                           | — | — | — | — | (2.66,  | (3.44,  | (0.60,  | <0.001 | (6.49,  | (9.39,   | (0.94,  | <0.001 | (0.06, | (0.11, | (0.53,  | <0.001 |
|                                          |   |   |   |   | 3.32)   | 4.13)   | 1.13)   |        | 7.50)   | 10.51)   | 1.46)   |        | 0.21)  | 0.27)  | 1.85)   |        |
|                                          |   |   |   |   | 9.26    | 9.58    | 0.13    |        | 84.02   | 48.86    | -1.89   |        | 1.49   | 0.86   | -1.91   |        |
| United Republic of<br>Tanzania           | — | — | — | — | (8.28,  | (8.93,  | (0.10,  | <0.001 | (81.05, | (47.42,  | (-2.08, | <0.001 | (1.12, | (0.67, | (-2.11, | <0.001 |
|                                          |   |   |   |   | 10.33)  | 10.26)  | 0.15)   |        | 87.08)  | 50.34)   | -1.70)  |        | 1.96)  | 1.07)  | -1.71)  |        |
|                                          |   |   |   |   | 67.90   | 77.88   | 0.51    |        | 38.66   | 72.69    | 2.22    |        | 0.59   | 1.19   | 2.49    |        |
| United States of<br>America              | — | — | — | — | (67.22, | (77.17, | (0.31,  | <0.001 | (38.14, | (72.00,  | (1.98,  | <0.001 | (0.53, | (1.10, | (2.16,  | <0.001 |
|                                          |   |   |   |   | 68.59)  | 78.60)  | 0.70)   |        | 39.18)  | 73.39)   | 2.45)   |        | 0.66)  | 1.28)  | 2.83)   |        |
|                                          |   |   |   |   | 5.65    | 5.49    | -0.09   |        | 77.01   | 47.04    | -1.58   |        | 1.37   | 0.85   | -1.55   |        |
| United States<br>Virgin Islands          | — | — | — | — | (0.16,  | (0.07,  | (-0.14, | <0.001 | (42.24, | (19.21,  | (-2.44, | <0.001 | (0.00, | (0.00, | (-2.61, | 0.005  |
|                                          |   |   |   |   | 31.97)  | 37.48)  | -0.04)  |        | 129.60) | 97.80)   | -0.72)  |        | 24.36) | 29.28) | -0.48)  |        |
|                                          |   |   |   |   | 2.49    | 3.40    | 1.09    |        | 7.85    | 7.80     | -0.09   |        | 0.14   | 0.14   | 0.05    |        |
| Uruguay                                  | — | — | — | — | (1.35,  | (2.09,  | (1.04,  | <0.001 | (5.68,  | (5.74,   | (-0.40, | 0.554  | (0.00, | (0.00, | (-0.28, | 0.779  |
|                                          |   |   |   |   | 4.21)   | 5.22)   | 1.14)   |        | 10.58)  | 10.37)   | 0.22)   |        | 0.95)  | 0.89)  | 0.38)   |        |
|                                          |   |   |   |   | 13.18   | 13.37   | 0.05    |        | 27.24   | 29.66    | 0.29    |        | 0.47   | 0.50   | 0.22    |        |
| Uzbekistan                               | — | — | — | — | (12.03, | (12.54, | (-0.01, | 0.087  | (25.59, | (28.41,  | (0.13,  | <0.001 | (0.27, | (0.35, | (-0.08, | 0.151  |
|                                          |   |   |   |   | 14.42)  | 14.26)  | 0.11)   |        | 28.97)  | 30.96)   | 0.44)   |        | 0.75)  | 0.70)  | 0.53)   |        |
|                                          |   |   |   |   | 7.94    | 7.99    | 0.03    |        | 115.24  | 153.54   | 0.97    |        | 2.09   | 2.78   | 0.98    |        |
| Vanuatu                                  | — | — | — | — | (0.93,  | (2.22,  | (-0.01, | 0.144  | (76.93, | (121.58, | (0.83,  | <0.001 | (0.00, | (0.18, | (0.72,  | <0.001 |
|                                          |   |   |   |   | 29.43)  | 20.48)  | 0.06)   |        | 166.19) | 191.46)  | 1.11)   |        | 19.60) | 12.54) | 1.24)   |        |
| Venezuela<br>(Bolivarian<br>Republic of) | — | — | — | — | 1.35    | 1.34    | -0.04   |        | 47.99   | 29.37    | -1.63   |        | 0.85   | 0.52   | -1.54   |        |
|                                          |   |   |   |   | (1.02,  | (1.03,  | (-0.09, | 0.152  | (45.75, | (27.93,  | (-2.19, | <0.001 | (0.57, | (0.34, | (-2.13, | <0.001 |
|                                          |   |   |   |   | 1.77)   | 1.71)   | 0.02)   |        | 50.30)  | 30.86)   | -1.07)  |        | 1.21)  | 0.75)  | -0.95)  |        |

|                       |        |         |         |        |         |          |         |        |         |         |         |        |        |        |         |        |
|-----------------------|--------|---------|---------|--------|---------|----------|---------|--------|---------|---------|---------|--------|--------|--------|---------|--------|
|                       |        |         |         |        | 12.27   | 12.81    | 0.15    |        | 59.17   | 33.41   | -1.95   |        | 1.05   | 0.58   | -2.04   |        |
| Viet Nam              | —      | —       | —       | —      | (11.64, | (12.35,  | (0.13,  | <0.001 | (57.78, | (32.64, | (-2.12, | <0.001 | (0.87, | (0.48, | (-2.26, | <0.001 |
|                       |        |         |         |        | 12.94)  | 13.30)   | 0.17)   |        | 60.59)  | 34.19)  | -1.77)  |        | 1.26)  | 0.69)  | -1.82)  |        |
|                       |        |         |         |        | 18.92   | 20.24    | 0.23    |        | 72.26   | 72.71   | 0.06    |        | 1.27   | 1.27   | 0.02    |        |
| Yemen                 | —      | —       | —       | —      | (16.99, | (19.10,  | (0.17,  | <0.001 | (68.47, | (70.57, | (-0.27, | 0.743  | (0.82, | (1.00, | (-0.33, | 0.912  |
|                       |        |         |         |        | 21.00)  | 21.42)   | 0.28)   |        | 76.20)  | 74.91)  | 0.39)   |        | 1.90)  | 1.59)  | 0.37)   |        |
|                       |        |         |         |        | 7.81    | 8.22     | 0.18    |        | 75.08   | 80.71   | 0.24    |        | 1.33   | 1.44   | 0.26    |        |
| Zambia                | —      | —       | —       | —      | (6.18,  | (7.23,   | (0.13,  | <0.001 | (69.96, | (77.56, | (0.11,  | <0.001 | (0.73, | (1.05, | (0.07,  | 0.006  |
|                       |        |         |         |        | 9.75)   | 9.31)    | 0.23)   |        | 80.50)  | 83.94)  | 0.37)   |        | 2.26)  | 1.94)  | 0.45)   |        |
|                       |        |         |         |        | 1.42    | 1.33     | -0.23   |        | 28.65   | 34.96   | 0.73    |        | 0.50   | 0.60   | 0.72    |        |
| Zimbabwe              | —      | —       | —       | —      | (0.87,  | (0.92,   | (-0.39, | 0.006  | (26.03, | (32.76, | (0.26,  | 0.002  | (0.21, | (0.34, | (0.18,  | 0.009  |
|                       |        |         |         |        | 2.21)   | 1.87)    | -0.07)  |        | 31.47)  | 37.28)  | 1.21)   |        | 1.02)  | 0.98)  | 1.26)   |        |
| <b>Non-rheumatic</b>  |        |         |         |        |         |          |         |        |         |         |         |        |        |        |         |        |
| <b>valvular heart</b> |        |         |         |        |         |          |         |        |         |         |         |        |        |        |         |        |
| <b>disease</b>        |        |         |         |        |         |          |         |        |         |         |         |        |        |        |         |        |
| <b>Overall</b>        |        |         |         |        |         |          |         |        |         |         |         |        |        |        |         |        |
|                       | 1.36   | 1.32    | -0.12   |        | 7.67    | 7.26     | -0.20   |        | 31.45   | 23.95   | -0.87   |        | 0.53   | 0.41   | -0.85   |        |
| Afghanistan           | (0.96, | (1.12,  | (-0.23, | 0.033  | (6.58,  | (6.73,   | (-0.29, | <0.001 | (29.47, | (23.10, | (-1.04, | <0.001 | (0.30, | (0.30, | (-1.07, | <0.001 |
|                       | 1.90)  | 1.54)   | -0.01)  |        | 8.90)   | 7.81)    | -0.11)  |        | 33.55)  | 24.83)  | -0.70)  |        | 0.90)  | 0.54)  | -0.64)  |        |
|                       | 11.76  | 16.16   | 1.10    |        | 90.44   | 127.01   | 1.17    |        | 5.27    | 5.06    | -0.11   |        | 0.09   | 0.08   | -0.42   |        |
| Albania               | (9.99, | (13.72, | (1.07,  | <0.001 | (85.32, | (119.94, | (1.10,  | <0.001 | (4.13,  | (3.74,  | (-0.61, | 0.663  | (0.00, | (0.00, | (-0.77, | 0.020  |
|                       | 13.76) | 18.92)  | 1.13)   |        | 95.79)  | 134.40)  | 1.24)   |        | 6.65)   | 6.70)   | 0.39)   |        | 0.47)  | 0.57)  | -0.07)  |        |
|                       | 2.04   | 2.11    | 0.12    |        | 14.03   | 14.25    | 0.09    |        | 28.44   | 18.63   | -1.40   |        | 0.47   | 0.31   | -1.42   |        |
| Algeria               | (1.75, | (1.91,  | (0.04,  | 0.003  | (13.21, | (13.72,  | (-0.28, | 0.639  | (27.36, | (17.99, | (-1.51, | <0.001 | (0.34, | (0.23, | (-1.60, | <0.001 |
|                       | 2.37)  | 2.33)   | 0.20)   |        | 14.89)  | 14.79)   | 0.46)   |        | 29.55)  | 19.28)  | -1.28)  |        | 0.64)  | 0.41)  | -1.25)  |        |
|                       | 3.26   | 3.53    | 0.16    |        | 21.23   | 23.74    | 0.33    |        | 25.69   | 29.07   | 0.46    |        | 0.41   | 0.47   | 0.48    |        |
| American Samoa        | (0.01, | (0.01,  | (-0.10, | 0.232  | (5.35,  | (6.48,   | (0.01,  | 0.043  | (8.51,  | (10.61, | (-0.05, | 0.077  | (0.00, | (0.00, | (0.18,  | 0.002  |
|                       | 29.11) | 29.71)  | 0.41)   |        | 57.62)  | 61.56)   | 0.66)   |        | 61.96)  | 66.34)  | 0.97)   |        | 24.00) | 24.17) | 0.78)   |        |
|                       | 0.78   | 2.06    | 3.43    |        | 2.60    | 12.27    | 5.52    |        | 6.08    | 4.56    | -0.98   |        | 0.10   | 0.08   | -0.76   |        |
| Andorra               | (0.00, | (0.00,  | (3.20,  | <0.001 | (0.02,  | (3.34,   | (4.19,  | <0.001 | (0.47,  | (0.21,  | (-1.07, | <0.001 | (0.00, | (0.00, | (-0.76, | <0.001 |
|                       | 21.67) | 22.54)  | 3.65)   |        | 24.48)  | 36.48)   | 6.86)   |        | 29.91)  | 26.45)  | -0.89)  |        | 20.61) | 19.39) | -0.76)  |        |
|                       | 0.71   | 0.73    | 0.05    |        | 2.28    | 2.31     | 0.01    |        | 13.75   | 10.89   | -0.76   |        | 0.23   | 0.18   | -0.87   |        |
| Angola                | (0.46, | (0.57,  | (-0.15, | 0.603  | (1.78,  | (1.99,   | (-0.39, | 0.977  | (12.59, | (10.26, | (-1.39, | 0.017  | (0.10, | (0.11, | (-1.00, | <0.001 |

|                     |         |         |        |        |          |          |         |        |         |         |         |        |        |        |         |        |
|---------------------|---------|---------|--------|--------|----------|----------|---------|--------|---------|---------|---------|--------|--------|--------|---------|--------|
|                     | 1.06)   | 0.93)   | 0.25)  |        | 2.88)    | 2.65)    | 0.40)   |        | 15.00)  | 11.54)  | -0.14)  | 0.45)  | 0.29)  | -0.74) |         |        |
| Antigua and Barbuda | 1.56)   | 1.87)   | 0.60)  |        | 8.95)    | 9.29)    | -0.16)  |        | 18.48)  | 14.34)  | -0.77)  | 0.31)  | 0.24)  | -0.90) |         |        |
|                     | (0.00,  | (0.01,  | (0.51, | <0.001 | (1.19,   | (2.18,   | (-0.53, | 0.380  | (5.69,  | (4.67,  | (-2.17, | 0.284  | (0.00, | (0.00, | (-2.54, | 0.288  |
|                     | 19.46)  | 15.18)  | 0.69)  |        | 31.95)   | 26.60)   | 0.20)   |        | 45.44)  | 34.11)  | 0.64)   | 17.14) | 12.26) | 0.77)  |         |        |
| Argentina           | 2.72)   | 4.08)   | 1.39)  |        | 19.10)   | 28.66)   | 1.39)   |        | 11.25)  | 8.40)   | -1.02)  | 0.19)  | 0.14)  | -1.04) |         |        |
|                     | (2.43,  | (3.79,  | (1.34, | <0.001 | (18.32,  | (27.88,  | (1.21,  | <0.001 | (10.66, | (7.98,  | (-1.26, | <0.001 | (0.12, | (0.09, | (-1.45, | <0.001 |
|                     | 3.03)   | 4.39)   | 1.45)  |        | 19.90)   | 29.45)   | 1.58)   |        | 11.87)  | 8.84)   | -0.78)  | 0.28)  | 0.21)  | -0.63) |         |        |
| Armenia             | 9.49)   | 11.17)  | 0.58)  |        | 74.57)   | 86.73)   | 0.50)   |        | 3.27)   | 3.48)   | 0.18)   | 0.05)  | 0.06)  | 0.96)  |         |        |
|                     | (7.97,  | (9.37,  | (0.54, | <0.001 | (70.18,  | (81.74,  | (0.39,  | <0.001 | (2.41,  | (2.50,  | (-0.60, | 0.646  | (0.00, | (0.00, | (-0.72, | 0.264  |
|                     | 11.23)  | 13.27)  | 0.62)  |        | 79.17)   | 92.00)   | 0.62)   |        | 4.36)   | 4.79)   | 0.97)   | 0.38)  | 0.57)  | 2.66)  |         |        |
| Australia           | 3.14)   | 11.23)  | 4.51)  |        | 21.63)   | 87.16)   | 4.93)   |        | 9.73)   | 6.35)   | -1.46)  | 0.17)  | 0.11)  | -1.47) |         |        |
|                     | (2.74,  | (10.55, | (4.42, | <0.001 | (20.57,  | (85.27,  | (4.72,  | <0.001 | (9.00,  | (5.83,  | (-1.84, | <0.001 | (0.08, | (0.05, | (-2.20, | <0.001 |
|                     | 3.59)   | 11.96)  | 4.60)  |        | 22.74)   | 89.08)   | 5.14)   |        | 10.49)  | 6.91)   | -1.08)  | 0.30)  | 0.21)  | -0.74) |         |        |
| Austria             | 5.95)   | 9.09)   | 1.49)  |        | 44.23)   | 71.97)   | 1.76)   |        | 13.43)  | 11.62)  | -0.53)  | 0.22)  | 0.19)  | -0.55) |         |        |
|                     | (5.11,  | (8.05,  | (1.38, | <0.001 | (41.90,  | (69.05,  | (1.53,  | <0.001 | (12.14, | (10.40, | (-1.18, | 0.118  | (0.09, | (0.07, | (-0.84, | <0.001 |
|                     | 6.89)   | 10.24)  | 1.60)  |        | 46.67)   | 75.00)   | 1.99)   |        | 14.82)  | 12.95)  | 0.13)   | 0.49)  | 0.46)  | -0.25) |         |        |
| Azerbaijan          | 9.80)   | 11.65)  | 0.60)  |        | 77.25)   | 90.49)   | 0.55)   |        | 3.89)   | 4.55)   | 0.49)   | 0.06)  | 0.07)  | 0.41)  |         |        |
|                     | (8.70,  | (10.68, | (0.55, | <0.001 | (74.05,  | (87.80,  | (0.45,  | <0.001 | (3.22,  | (3.91,  | (-0.04, | 0.072  | (0.01, | (0.01, | (-0.72, | 0.478  |
|                     | 11.00)  | 12.69)  | 0.65)  |        | 80.57)   | 93.25)   | 0.64)   |        | 4.66)   | 5.26)   | 1.04)   | 0.25)  | 0.23)  | 1.56)  |         |        |
| Bahamas             | 1.47)   | 1.96)   | 1.01)  |        | 7.09)    | 10.35)   | 1.23)   |        | 19.01)  | 21.49)  | 0.43)   | 0.32)  | 0.37)  | 0.45)  |         |        |
|                     | (0.12,  | (0.40,  | (0.91, | <0.001 | (2.89,   | (5.91,   | (0.51,  | 0.001  | (11.82, | (14.75, | (-0.03, | 0.069  | (0.00, | (0.00, | (0.02,  | 0.042  |
|                     | 6.39)   | 5.88)   | 1.11)  |        | 14.62)   | 16.92)   | 1.95)   |        | 29.20)  | 30.33)  | 0.89)   | 4.49)  | 3.33)  | 0.89)  |         |        |
| Bahrain             | 3.10)   | 3.68)   | 0.59)  |        | 20.91)   | 25.65)   | 0.67)   |        | 11.55)  | 9.84)   | -0.58)  | 0.19)  | 0.16)  | -0.63) |         |        |
|                     | (1.37,  | (2.35,  | (0.55, | <0.001 | (15.94,  | (22.28,  | (0.60,  | <0.001 | (7.61,  | (7.31,  | (-1.39, | 0.168  | (0.00, | (0.00, | (-2.00, | 0.375  |
|                     | 6.43)   | 5.67)   | 0.63)  |        | 27.25)   | 29.56)   | 0.74)   |        | 17.05)  | 13.06)  | 0.24)   | 2.48)  | 1.22)  | 0.77)  |         |        |
| Bangladesh          | 0.48)   | 0.55)   | 0.43)  |        |          | 0.90)    |         |        | 11.71)  | 9.49)   | -0.68)  | 0.19)  | 0.16)  | -0.54) |         |        |
|                     | (0.41,  | (0.49,  | (0.16, | 0.001  | —        | (0.82,   | —       | —      | (11.38, | (9.25,  | (-1.16, | 0.005  | (0.15, | (0.13, | (-1.00, | 0.021  |
|                     | 0.55)   | 0.61)   | 0.69)  |        |          | 0.97)    |         |        | 12.05)  | 9.72)   | -0.21)  | 0.24)  | 0.19)  | -0.08) |         |        |
| Barbados            | 1.42)   | 1.99)   | 1.16)  |        | 6.89)    | 10.40)   | 1.28)   |        | 15.48)  | 13.01)  | -0.77)  | 0.26)  | 0.22)  | -0.71) |         |        |
|                     | (0.11,  | (0.25,  | (1.09, | <0.001 | (2.88,   | (5.24,   | (0.92,  | <0.001 | (9.00,  | (6.94,  | (-1.59, | 0.068  | (0.00, | (0.00, | (-1.49, | 0.075  |
|                     | 6.09)   | 7.41)   | 1.22)  |        | 13.96)   | 18.79)   | 1.64)   |        | 24.91)  | 22.38)  | 0.06)   | 4.09)  | 4.48)  | 0.07)  |         |        |
| Belarus             | 14.76)  | 19.60)  | 1.00)  |        | 115.67)  | 154.76)  | 1.03)   |        | 1.95)   | 2.39)   | 0.66)   | 0.03)  | 0.04)  | 1.31)  |         |        |
|                     | (13.61, | (18.13, | (0.95, | <0.001 | (112.46, | (150.78, | (0.94,  | <0.001 | (1.54,  | (1.89,  | (-0.13, | 0.101  | (0.00, | (0.00, | (-0.77, | 0.218  |

|                   |         |         |         |        |          |          |         |        |         |         |         |        |        |        |         |        |
|-------------------|---------|---------|---------|--------|----------|----------|---------|--------|---------|---------|---------|--------|--------|--------|---------|--------|
|                   | 15.98)  | 21.18)  | 1.06)   |        | 118.94)  | 158.84)  | 1.12)   |        | 2.45)   | 3.01)   | 1.45)   |        | 0.16)  | 0.24)  | 3.44)   |        |
|                   | 0.37    | 0.65    | 1.88    |        |          |          |         |        | 8.09    | 5.26    | -1.59   |        | 0.14   | 0.09   | -1.55   |        |
| Belgium           | (0.21,  | (0.42,  | (1.64,  | <0.001 | —        | —        | —       | —      | (7.21,  | (4.54,  | (-2.24, | <0.001 | (0.05, | (0.02, | (-1.98, | <0.001 |
|                   | 0.63)   | 0.98)   | 2.12)   |        |          |          |         |        | 9.06)   | 6.07)   | -0.95)  |        | 0.33)  | 0.27)  | -1.13)  |        |
|                   | 1.26    | 2.11    | 1.77    |        | 6.29     | 10.87    | 1.91    |        | 12.33   | 16.92   | 1.02    |        | 0.20   | 0.28   | 1.08    |        |
| Belize            | (0.01,  | (0.52,  | (1.42,  | <0.001 | (1.47,   | (6.35,   | (1.57,  | <0.001 | (5.43,  | (11.34, | (0.36,  | 0.003  | (0.00, | (0.00, | (0.19,  | 0.018  |
|                   | 9.54)   | 5.82)   | 2.12)   |        | 17.67)   | 17.39)   | 2.26)   |        | 24.96)  | 24.37)  | 1.70)   |        | 7.71)  | 2.91)  | 1.99)   |        |
|                   | 0.75    | 0.82    | 0.30    |        | 3.23     | 3.49     | 0.17    |        | 12.70   | 13.92   | 0.34    |        | 0.21   | 0.23   | 0.36    |        |
| Benin             | (0.38,  | (0.57,  | (0.17,  | <0.001 | (2.34,   | (2.91,   | (-0.01, | 0.064  | (11.03, | (12.87, | (0.08,  | 0.010  | (0.05, | (0.11, | (0.05,  | 0.025  |
|                   | 1.35)   | 1.15)   | 0.43)   |        | 4.35)    | 4.15)    | 0.35)   |        | 14.56)  | 15.03)  | 0.59)   |        | 0.61)  | 0.42)  | 0.67)   |        |
|                   | 3.19    | 3.95    | 0.71    |        | 18.76    | 24.57    | 0.86    |        | 49.41   | 25.81   | -2.36   |        | 0.83   | 0.43   | -2.36   |        |
| Bermuda           | (0.05,  | (0.04,  | (0.51,  | <0.001 | (6.57,   | (8.59,   | (0.44,  | <0.001 | (26.12, | (8.03,  | (-2.86, | <0.001 | (0.00, | (0.00, | (-2.92, | <0.001 |
|                   | 25.09)  | 32.54)  | 0.92)   |        | 46.51)   | 60.75)   | 1.28)   |        | 87.70)  | 65.07)  | -1.85)  |        | 21.55) | 26.94) | -1.81)  |        |
|                   | 0.52    | 0.68    | 0.92    |        |          | 1.90     |         |        | 6.31    | 6.01    | -0.18   |        | 0.11   | 0.10   | -0.26   |        |
| Bhutan            | (0.02,  | (0.11,  | (0.72,  | <0.001 | —        | (0.72,   | —       | —      | (3.48,  | (3.72,  | (-0.29, | 0.001  | (0.00, | (0.00, | (-0.64, | 0.170  |
|                   | 2.98)   | 2.30)   | 1.13)   |        |          | 4.08)    |         |        | 10.74)  | 9.22)   | -0.08)  |        | 2.29)  | 1.34)  | 0.11)   |        |
| Bolivia           | 0.68    | 0.84    | 0.68    |        | 1.39     | 1.15     | -0.57   |        | 15.63   | 10.35   | -1.39   |        | 0.26   | 0.17   | -1.54   |        |
| (Plurinational    | (0.38,  | (0.60,  | (0.57,  | <0.001 | (0.92,   | (0.86,   | (-0.93, | 0.002  | (14.08, | (9.46,  | (-1.55, | <0.001 | (0.09, | (0.07, | (-1.72, | <0.001 |
| State of)         | 1.13)   | 1.15)   | 0.79)   |        | 2.01)    | 1.51)    | -0.21)  |        | 17.30)  | 11.30)  | -1.24)  |        | 0.57)  | 0.34)  | -1.35)  |        |
|                   | 11.95   | 17.40   | 1.31    |        | 91.67    | 137.49   | 1.38    |        | 9.69    | 10.31   | 0.22    |        | 0.17   | 0.18   | 0.16    |        |
| Bosnia and        | (10.47, | (15.02, | (1.23,  | <0.001 | (87.48,  | (130.78, | (1.30,  | <0.001 | (8.35,  | (8.48,  | (-0.30, | 0.413  | (0.04, | (0.02, | (-0.52, | 0.640  |
| Herzegovina       | 13.59)  | 20.08)  | 1.39)   |        | 96.00)   | 144.49)  | 1.46)   |        | 11.18)  | 12.44)  | 0.73)   |        | 0.48)  | 0.71)  | 0.86)   |        |
|                   | 0.98    | 1.14    | 0.51    |        | 4.00     | 5.62     | 1.23    |        | 20.56   | 17.41   | -0.58   |        | 0.34   | 0.29   | -0.61   |        |
| Botswana          | (0.28,  | (0.59,  | (0.39,  | <0.001 | (2.24,   | (4.32,   | (0.74,  | <0.001 | (16.65, | (14.99, | (-0.74, | <0.001 | (0.03, | (0.06, | (-0.98, | 0.002  |
|                   | 2.55)   | 1.99)   | 0.62)   |        | 6.62)    | 7.21)    | 1.73)   |        | 25.19)  | 20.12)  | -0.43)  |        | 1.59)  | 0.86)  | -0.23)  |        |
|                   | 1.65    | 1.65    | -0.04   |        | 7.66     | 6.63     | -0.61   |        | 34.16   | 15.20   | -2.76   |        | 0.58   | 0.26   | -2.81   |        |
| Brazil            | (1.55,  | (1.57,  | (-0.31, | 0.787  | (7.43,   | (6.47,   | (-0.93, | <0.001 | (33.69, | (14.94, | (-3.05, | <0.001 | (0.52, | (0.22, | (-2.96, | <0.001 |
|                   | 1.76)   | 1.73)   | 0.23)   |        | 7.89)    | 6.80)    | -0.29)  |        | 34.63)  | 15.46)  | -2.46)  |        | 0.64)  | 0.29)  | -2.66)  |        |
|                   | 28.70   | 31.80   | 0.35    |        | 227.58   | 254.58   | 0.39    |        | 14.05   | 13.07   | -0.25   |        | 0.23   | 0.22   | -0.16   |        |
| Brunei Darussalam | (20.05, | (24.69, | (0.33,  | <0.001 | (201.64, | (233.94, | (0.36,  | <0.001 | (8.21,  | (8.63,  | (-0.62, | 0.185  | (0.00, | (0.00, | (-0.80, | 0.637  |
|                   | 39.94)  | 40.49)  | 0.38)   |        | 256.02)  | 276.71)  | 0.43)   |        | 22.56)  | 19.17)  | 0.12)   |        | 3.75)  | 2.61)  | 0.49)   |        |
|                   | 13.64   | 19.61   | 1.25    |        | 106.22   | 155.22   | 1.30    |        | 10.08   | 12.52   | 0.79    |        | 0.16   | 0.20   | 0.91    |        |
| Bulgaria          | (12.36, | (17.79, | (1.22,  | <0.001 | (102.66, | (150.24, | (1.22,  | <0.001 | (8.97,  | (10.96, | (-0.37, | 0.183  | (0.05, | (0.05, | (-0.16, | 0.097  |

|                          |         |         |         |        |          |          |         |        |         |         |         |        |        |        |         |        |
|--------------------------|---------|---------|---------|--------|----------|----------|---------|--------|---------|---------|---------|--------|--------|--------|---------|--------|
|                          | 15.01)  | 21.60)  | 1.29)   |        | 109.88)  | 160.36)  | 1.37)   |        | 11.29)  | 14.26)  | 1.97)   |        | 0.39)  | 0.56)  | 1.99)   |        |
|                          | 0.62)   | 0.75)   | 0.61)   |        | 1.04)    | 3.23)    | 3.39)   |        | 11.04)  | 12.52)  | 0.47)   |        | 0.18)  | 0.21)  | 0.57)   |        |
| Burkina Faso             | (0.36,  | (0.57,  | (0.42,  | <0.001 | (0.67,   | (2.82,   | (1.15,  | 0.003  | (9.88,  | (11.77, | (0.04,  | 0.032  | (0.06, | (0.12, | (-0.30, | 0.197  |
|                          | 1.01)   | 0.98)   | 0.80)   |        | 1.54)    | 3.69)    | 5.69)   |        | 12.31)  | 13.31)  | 0.89)   |        | 0.43)  | 0.34)  | 1.44)   |        |
|                          | 0.67)   | 0.48)   | -1.15)  |        | 2.06)    |          |         |        | 23.84)  | 12.36)  | -2.27)  |        | 0.39)  | 0.20)  | -2.29)  |        |
| Burundi                  | (0.35,  | (0.29,  | (-1.42, | <0.001 | (1.41,   | —        | —       | —      | (21.74, | (11.35, | (-2.49, | <0.001 | (0.17, | (0.09, | (-2.69, | <0.001 |
|                          | 1.17)   | 0.75)   | -0.89)  |        | 2.91)    |          |         |        | 26.11)  | 13.44)  | -2.05)  |        | 0.81)  | 0.40)  | -1.88)  |        |
|                          | 0.96)   | 1.14)   | 0.55)   |        | 3.97)    | 5.77)    | 1.11)   |        | 15.73)  | 13.97)  | -0.63)  |        | 0.26)  | 0.23)  | -0.69)  |        |
| Cabo Verde               | (0.02,  | (0.22,  | (0.40,  | <0.001 | (0.88,   | (3.18,   | (0.68,  | <0.001 | (9.32,  | (9.69,  | (-1.11, | 0.011  | (0.00, | (0.00, | (-1.25, | 0.019  |
|                          | 6.49)   | 3.50)   | 0.70)   |        | 11.47)   | 9.68)    | 1.54)   |        | 25.63)  | 19.55)  | -0.14)  |        | 5.34)  | 2.04)  | -0.12)  |        |
|                          | 0.84)   | 1.00)   | 0.60)   |        | 4.24)    | 5.84)    | 1.24)   |        | 3.42)   | 2.39)   | -1.21)  |        | 0.06)  | 0.04)  | -1.37)  |        |
| Cambodia                 | (0.56,  | (0.78,  | (0.53,  | <0.001 | (3.53,   | (5.28,   | (0.79,  | <0.001 | (2.83,  | (2.05,  | (-1.34, | <0.001 | (0.01, | (0.01, | (-1.37, | <0.001 |
|                          | 1.22)   | 1.26)   | 0.67)   |        | 5.06)    | 6.44)    | 1.69)   |        | 4.10)   | 2.79)   | -1.09)  |        | 0.23)  | 0.12)  | -1.37)  |        |
|                          | 0.87)   | 0.92)   | 0.17)   |        | 3.76)    | 3.80)    | -0.12)  |        | 13.89)  | 15.71)  | 0.42)   |        | 0.23)  | 0.26)  | 0.42)   |        |
| Cameroon                 | (0.58,  | (0.75,  | (0.04,  | 0.012  | (3.08,   | (3.42,   | (-0.26, | 0.086  | (12.70, | (15.00, | (0.30,  | <0.001 | (0.10, | (0.17, | (0.05,  | 0.027  |
|                          | 1.27)   | 1.12)   | 0.30)   |        | 4.54)    | 4.21)    | 0.02)   |        | 15.18)  | 16.45)  | 0.55)   |        | 0.47)  | 0.37)  | 0.79)   |        |
|                          | 21.81)  | 22.81)  | 0.16)   |        | 172.81)  | 179.78)  | 0.14)   |        | 7.54)   | 6.15)   | -0.68)  |        | 0.13)  | 0.10)  | -0.95)  |        |
| Canada                   | (20.98, | (21.97, | (0.14,  | <0.001 | (170.50, | (177.46, | (0.09,  | <0.001 | (7.05,  | (5.72,  | (-1.14, | 0.003  | (0.07, | (0.05, | (-2.02, | 0.085  |
|                          | 22.67)  | 23.67)  | 0.18)   |        | 175.15)  | 182.13)  | 0.19)   |        | 8.06)   | 6.61)   | -0.23)  |        | 0.21)  | 0.18)  | 0.13)   |        |
|                          | 0.54)   | 0.49)   | -0.36)  |        |          |          |         |        | 14.10)  | 11.09)  | -0.89)  |        | 0.23)  | 0.18)  | -0.80)  |        |
| Central African Republic | (0.17,  | (0.22,  | (-0.56, | <0.001 | —        | —        | —       | —      | (11.84, | (9.67,  | (-1.20, | <0.001 | (0.03, | (0.05, | (-1.11, | <0.001 |
|                          | 1.32)   | 0.94)   | -0.16)  |        |          |          |         |        | 16.71)  | 12.68)  | -0.57)  |        | 0.87)  | 0.52)  | -0.49)  |        |
|                          | 0.65)   | 0.79)   | 0.67)   |        | 1.12)    | 3.44)    | 3.84)   |        | 11.60)  | 13.63)  | 0.59)   |        | 0.19)  | 0.22)  | 0.58)   |        |
| Chad                     | (0.33,  | (0.55,  | (0.52,  | <0.001 | (0.67,   | (2.90,   | (2.63,  | <0.001 | (10.16, | (12.67, | (0.38,  | <0.001 | (0.05, | (0.11, | (0.36,  | <0.001 |
|                          | 1.15)   | 1.09)   | 0.82)   |        | 1.77)    | 4.06)    | 5.07)   |        | 13.20)  | 14.65)  | 0.81)   |        | 0.53)  | 0.40)  | 0.80)   |        |
|                          | 2.93)   | 6.07)   | 2.52)   |        | 19.82)   | 46.07)   | 2.90)   |        | 13.26)  | 10.31)  | -0.84)  |        | 0.23)  | 0.18)  | -0.84)  |        |
| Chile                    | (2.49,  | (5.51,  | (2.42,  | <0.001 | (18.64,  | (44.52,  | (2.56,  | <0.001 | (12.32, | (9.57,  | (-1.19, | <0.001 | (0.12, | (0.09, | (-1.34, | 0.001  |
|                          | 3.42)   | 6.68)   | 2.62)   |        | 21.06)   | 47.67)   | 3.25)   |        | 14.26)  | 11.10)  | -0.50)  |        | 0.40)  | 0.31)  | -0.33)  |        |
|                          | 3.30)   | 3.94)   | 0.60)   |        | 24.71)   | 27.90)   | 0.41)   |        | 5.13)   | 2.92)   | -1.95)  |        | 0.09)  | 0.05)  | -1.84)  |        |
| China                    | (3.25,  | (3.89,  | (0.54,  | <0.001 | (24.57,  | (27.76,  | (0.31,  | <0.001 | (5.07,  | (2.87,  | (-2.41, | <0.001 | (0.08, | (0.04, | (-2.80, | <0.001 |
|                          | 3.35)   | 4.00)   | 0.66)   |        | 24.85)   | 28.03)   | 0.51)   |        | 5.19)   | 2.97)   | -1.48)  |        | 0.09)  | 0.06)  | -0.87)  |        |
|                          | 0.91)   | 1.21)   | 0.92)   |        | 3.00)    | 4.02)    | 0.83)   |        | 22.32)  | 16.26)  | -1.17)  |        | 0.38)  | 0.28)  | -1.13)  |        |
| Colombia                 | (0.76,  | (1.06,  | (0.77,  | <0.001 | (2.70,   | (3.74,   | (-0.32, | 0.157  | (21.52, | (15.69, | (-1.92, | 0.002  | (0.28, | (0.21, | (-2.03, | 0.015  |

|                   |         |         |         |        |          |          |         |        |         |         |         |        |        |        |         |        |
|-------------------|---------|---------|---------|--------|----------|----------|---------|--------|---------|---------|---------|--------|--------|--------|---------|--------|
|                   | 1.09)   | 1.38)   | 1.08)   |        | 3.33)    | 4.32)    | 1.99)   |        | 23.14)  | 16.84)  | -0.42)  |        | 0.50)  | 0.36)  | -0.22)  |        |
|                   | 0.89    | 0.68    | -0.97   |        | 3.70     | 2.09     | -1.98   |        | 18.20   | 12.06   | -1.47   |        | 0.30   | 0.20   | -1.50   |        |
| Comoros           | (0.04,  | (0.08,  | (-1.06, | <0.001 | (1.10,   | (0.72,   | (-2.80, | <0.001 | (12.12, | (8.39,  | (-4.37, | 0.333  | (0.00, | (0.00, | (-4.17, | 0.283  |
|                   | 4.66)   | 2.61)   | -0.87)  |        | 9.10)    | 4.75)    | -1.16)  |        | 26.57)  | 16.84)  | 1.53)   |        | 3.67)  | 1.81)  | 1.25)   |        |
|                   | 0.82    | 0.71    | -0.56   |        | 2.69     | 2.31     | -0.55   |        | 16.23   | 10.55   | -1.52   |        | 0.27   | 0.18   | -1.33   |        |
| Congo             | (0.32,  | (0.40,  | (-0.71, | <0.001 | (1.59,   | (1.70,   | (-0.87, | 0.001  | (13.64, | (9.20,  | (-2.38, | 0.001  | (0.04, | (0.04, | (-1.91, | <0.001 |
|                   | 1.78)   | 1.19)   | -0.41)  |        | 4.25)    | 3.08)    | -0.22)  |        | 19.21)  | 12.04)  | -0.65)  |        | 0.99)  | 0.48)  | -0.74)  |        |
|                   | 2.56    | 3.15    | 0.69    |        | 18.04    | 21.09    | 0.50    |        | 9.11    | 7.25    | -0.76   |        | 0.15   | 0.12   | -0.62   |        |
| Cook Islands      | (0.00,  | (0.00,  | (0.61,  | <0.001 | (0.79,   | (0.89,   | (0.18,  | 0.003  | (0.05,  | (0.00,  | (-0.92, | <0.001 | (0.00, | (0.00, | (-1.33, | 0.093  |
|                   | 65.28)  | 72.84)  | 0.77)   |        | 92.52)   | 105.33)  | 0.83)   |        | 76.29)  | 80.48)  | -0.61)  |        | 60.79) | 66.79) | 0.10)   |        |
|                   | 0.82    | 1.38    | 1.80    |        | 1.44     | 6.26     | 5.43    |        | 9.85    | 13.25   | 1.30    |        | 0.17   | 0.23   | 1.32    |        |
| Costa Rica        | (0.39,  | (0.92,  | (1.69,  | <0.001 | (0.81,   | (5.22,   | (2.48,  | <0.001 | (8.17,  | (11.68, | (0.95,  | <0.001 | (0.02, | (0.07, | (0.97,  | <0.001 |
|                   | 1.54)   | 2.02)   | 1.90)   |        | 2.37)    | 7.47)    | 8.46)   |        | 11.80)  | 14.98)  | 1.65)   |        | 0.63)  | 0.57)  | 1.68)   |        |
|                   | 0.89    | 0.91    | 0.01    |        | 4.13     | 4.01     | -0.16   |        | 13.18   | 13.61   | 0.15    |        | 0.21   | 0.22   | 0.16    |        |
| Cote d'Ivoire     | (0.63,  | (0.74,  | (-0.15, | 0.895  | (3.49,   | (3.62,   | (-0.28, | 0.006  | (12.15, | (12.92, | (-0.05, | 0.141  | (0.10, | (0.14, | (-0.00, | 0.055  |
|                   | 1.24)   | 1.12)   | 0.17)   |        | 4.86)    | 4.44)    | -0.05)  |        | 14.29)  | 14.32)  | 0.34)   |        | 0.41)  | 0.33)  | 0.32)   |        |
|                   | 16.50   | 26.21   | 1.61    |        | 128.49   | 207.97   | 1.67    |        | 8.38    | 8.29    | -0.08   |        | 0.14   | 0.14   | -0.09   |        |
| Croatia           | (14.73, | (23.59, | (1.51,  | <0.001 | (123.57, | (200.68, | (1.55,  | <0.001 | (7.13,  | (6.85,  | (-1.05, | 0.868  | (0.03, | (0.02, | (-1.54, | 0.900  |
|                   | 18.44)  | 29.08)  | 1.71)   |        | 133.57)  | 215.49)  | 1.78)   |        | 9.80)   | 9.98)   | 0.89)   |        | 0.47)  | 0.60)  | 1.37)   |        |
|                   | 1.38    | 2.02    | 1.29    |        | 6.51     | 10.71    | 1.71    |        | 20.33   | 14.80   | -1.10   |        | 0.34   | 0.25   | -1.08   |        |
| Cuba              | (1.06,  | (1.59,  | (1.21,  | <0.001 | (5.74,   | (9.70,   | (1.02,  | <0.001 | (19.05, | (13.59, | (-1.42, | <0.001 | (0.19, | (0.12, | (-1.73, | 0.001  |
|                   | 1.78)   | 2.53)   | 1.37)   |        | 7.36)    | 11.80)   | 2.41)   |        | 21.69)  | 16.10)  | -0.77)  |        | 0.57)  | 0.48)  | -0.42)  |        |
|                   | 0.20    | 1.03    | 5.92    |        |          | 4.65     |         |        | 7.35    | 5.33    | -1.17   |        | 0.12   | 0.09   | -1.11   |        |
| Cyprus            | (0.00,  | (0.37,  | (5.39,  | <0.001 | —        | (3.15,   | —       | —      | (4.65,  | (3.52,  | (-1.68, | <0.001 | (0.00, | (0.00, | (-1.60, | <0.001 |
|                   | 1.69)   | 2.62)   | 6.45)   |        |          | 6.90)    |         |        | 11.11)  | 7.96)   | -0.66)  |        | 1.56)  | 1.36)  | -0.61)  |        |
|                   | 13.39   | 21.93   | 1.72    |        | 103.65   | 173.64   | 1.81    |        | 7.46    | 13.87   | 2.16    |        | 0.12   | 0.23   | 2.37    |        |
| Czechia           | (12.25, | (20.37, | (1.70,  | <0.001 | (100.49, | (169.39, | (1.72,  | <0.001 | (6.61,  | (12.60, | (1.54,  | <0.001 | (0.04, | (0.10, | (1.30,  | <0.001 |
|                   | 14.61)  | 23.60)  | 1.73)   |        | 106.89)  | 177.99)  | 1.89)   |        | 8.40)   | 15.25)  | 2.78)   |        | 0.31)  | 0.50)  | 3.46)   |        |
| Democratic        | 2.67    | 2.41    | -0.36   |        | 19.40    | 17.13    | -0.48   |        | 6.40    | 5.04    | -0.83   |        | 0.11   | 0.08   | -1.10   |        |
| People's Republic | (2.32,  | (2.12,  | (-0.40, | <0.001 | (18.41,  | (16.36,  | (-0.54, | <0.001 | (5.85,  | (4.61,  | (-0.87, | <0.001 | (0.05, | (0.04, | (-1.89, | 0.007  |
| of Korea          | 3.06)   | 2.72)   | -0.32)  |        | 20.43)   | 17.94)   | -0.42)  |        | 6.98)   | 5.50)   | -0.79)  |        | 0.21)  | 0.17)  | -0.30)  |        |
| Democratic        | 0.58    | 0.52    | -0.40   |        | 0.91     |          |         |        | 12.20   | 9.33    | -0.97   |        | 0.20   | 0.16   | -0.86   |        |
| Republic of the   | (0.46,  | (0.44,  | (-0.66, | 0.002  | (0.74,   | —        | —       | —      | (11.61, | (9.00,  | (-1.07, | <0.001 | (0.13, | (0.12, | (-0.99, | <0.001 |



|                    |         |         |         |        |          |          |         |        |         |         |         |        |        |        |         |        |
|--------------------|---------|---------|---------|--------|----------|----------|---------|--------|---------|---------|---------|--------|--------|--------|---------|--------|
| Congo              | 0.74)   | 0.61)   | -0.15)  |        | 1.12)    |          |         |        | 12.81)  | 9.67)   | -0.87)  |        | 0.30)  | 0.21)  | -0.74)  |        |
|                    | 0.35    | 1.41    | 4.91    |        |          | 6.96     |         |        | 5.72    | 4.19    | -1.05   |        | 0.10   | 0.07   | -1.17   |        |
| Denmark            | (0.14,  | (0.92,  | (4.30,  | <0.001 | —        | (5.81,   | —       | —      | (4.72,  | (3.30,  | (-1.73, | 0.002  | (0.01, | (0.00, | (-1.99, | 0.006  |
|                    | 0.74)   | 2.08)   | 5.52)   |        |          | 8.29)    |         |        | 6.90)   | 5.25)   | -0.38)  |        | 0.39)  | 0.36)  | -0.34)  |        |
| Djibouti           | 0.89    | 0.72    | -0.76   |        | 3.92     | 2.32     | -1.95   |        | 17.40   | 11.49   | -1.41   |        | 0.29   | 0.19   | -1.42   |        |
|                    | (0.06,  | (0.19,  | (-0.88, | <0.001 | (1.39,   | (1.20,   | (-2.64, | <0.001 | (11.86, | (8.73,  | (-2.06, | <0.001 | (0.00, | (0.00, | (-2.26, | 0.001  |
| Dominica           | 4.11)   | 1.95)   | -0.65)  |        | 8.75)    | 4.08)    | -1.25)  |        | 24.86)  | 14.86)  | -0.76)  |        | 3.12)  | 1.13)  | -0.57)  |        |
|                    | 1.36    | 1.76    | 0.88    |        | 5.52     | 9.28     | 1.81    |        | 18.33   | 16.50   | -0.37   |        | 0.31   | 0.28   | -0.41   |        |
| Dominican Republic | (0.00,  | (0.00,  | (0.70,  | <0.001 | (0.27,   | (1.45,   | (1.00,  | <0.001 | (5.86,  | (4.72,  | (-0.52, | <0.001 | (0.00, | (0.00, | (-0.56, | <0.001 |
|                    | 19.02)  | 18.11)  | 1.05)   |        | 26.61)   | 30.67)   | 2.62)   |        | 44.65)  | 41.37)  | -0.23)  |        | 17.10) | 15.23) | -0.26)  |        |
| Ecuador            | 1.02    | 1.48    | 1.29    |        | 5.01     | 7.03     | 1.14    |        | 16.88   | 14.51   | -0.49   |        | 0.28   | 0.24   | -0.36   |        |
|                    | (0.67,  | (1.15,  | (1.22,  | <0.001 | (4.15,   | (6.26,   | (0.81,  | <0.001 | (15.43, | (13.41, | (-0.72, | <0.001 | (0.12, | (0.12, | (-0.96, | 0.236  |
| Egypt              | 1.49)   | 1.89)   | 1.36)   |        | 6.00)    | 7.87)    | 1.47)   |        | 18.44)  | 15.67)  | -0.26)  |        | 0.56)  | 0.43)  | 0.24)   |        |
|                    | 0.84    | 2.57    | 3.95    |        | 2.61     | 14.07    | 5.97    |        | 16.58   | 16.26   | -0.25   |        | 0.27   | 0.27   | -0.23   |        |
| El Salvador        | (0.57,  | (2.21,  | (3.72,  | <0.001 | (2.09,   | (13.19,  | (4.10,  | <0.001 | (15.34, | (15.34, | (-0.69, | 0.271  | (0.13, | (0.16, | (-0.86, | 0.489  |
|                    | 1.20)   | 2.97)   | 4.18)   |        | 3.22)    | 14.99)   | 7.88)   |        | 17.90)  | 17.22)  | 0.20)   |        | 0.50)  | 0.42)  | 0.41)   |        |
| Equatorial Guinea  | 1.94    | 2.26    | 0.57    |        | 11.92    | 13.24    | 0.34    |        | 44.12   | 35.45   | -0.73   |        | 0.72   | 0.58   | -0.74   |        |
|                    | (1.75,  | (2.11,  | (0.47,  | <0.001 | (11.43,  | (12.88,  | (0.02,  | 0.036  | (43.24, | (34.88, | (-0.94, | <0.001 | (0.61, | (0.51, | (-0.99, | <0.001 |
| Eritrea            | 2.15)   | 2.41)   | 0.67)   |        | 12.43)   | 13.60)   | 0.66)   |        | 45.01)  | 36.04)  | -0.52)  |        | 0.84)  | 0.66)  | -0.49)  |        |
|                    | 0.55    | 0.90    | 1.72    |        | 1.06     | 1.31     | 0.78    |        | 5.26    | 4.84    | -0.33   |        | 0.09   | 0.08   | -0.59   |        |
| Estonia            | (0.26,  | (0.56,  | (1.59,  | <0.001 | (0.61,   | (0.88,   | (0.64,  | <0.001 | (4.28,  | (4.01,  | (-0.87, | 0.233  | (0.01, | (0.01, | (-1.47, | 0.195  |
|                    | 1.04)   | 1.37)   | 1.85)   |        | 1.72)    | 1.89)    | 0.92)   |        | 6.42)   | 5.80)   | 0.21)   |        | 0.39)  | 0.31)  | 0.30)   |        |
| Eswatini           | 0.62    | 0.95    | 1.49    |        | 1.91     | 5.26     | 3.86    |        | 14.01   | 8.62    | -1.69   |        | 0.23   | 0.15   | -1.52   |        |
|                    | (0.01,  | (0.32,  | (1.35,  | <0.001 | (0.30,   | (3.39,   | (2.62,  | <0.001 | (8.55,  | (6.39,  | (-1.96, | <0.001 | (0.00, | (0.00, | (-1.92, | <0.001 |
| Ecuador            | 4.24)   | 2.28)   | 1.64)   |        | 6.39)    | 7.80)    | 5.12)   |        | 21.87)  | 11.46)  | -1.42)  |        | 3.55)  | 1.09)  | -1.11)  |        |
|                    | 0.68    | 0.60    | -0.47   |        | 2.05     | 1.93     | -0.28   |        | 18.54   | 13.84   | -0.99   |        | 0.31   | 0.23   | -1.04   |        |
| Eritrea            | (0.27,  | (0.34,  | (-0.67, | <0.001 | (1.20,   | (1.39,   | (-0.52, | 0.017  | (16.04, | (12.47, | (-1.21, | <0.001 | (0.07, | (0.09, | (-1.29, | <0.001 |
|                    | 1.46)   | 0.99)   | -0.27)  |        | 3.28)    | 2.60)    | -0.05)  |        | 21.35)  | 15.33)  | -0.77)  |        | 0.93)  | 0.52)  | -0.79)  |        |
| Estonia            | 17.64   | 26.09   | 1.37    |        | 138.69   | 206.70   | 1.39    |        | 4.26    | 7.80    | 2.15    |        | 0.07   | 0.13   | 2.16    |        |
|                    | (14.43, | (21.53, | (1.32,  | <0.001 | (129.55, | (194.00, | (1.28,  | <0.001 | (2.74,  | (5.32,  | (1.53,  | <0.001 | (0.00, | (0.00, | (1.39,  | <0.001 |
| Eswatini           | 21.39)  | 31.48)  | 1.41)   |        | 148.36)  | 220.18)  | 1.50)   |        | 6.36)   | 11.20)  | 2.78)   |        | 0.86)  | 1.52)  | 2.93)   |        |
|                    | 0.94    | 1.18    | 0.89    |        | 3.97     | 5.20     | 0.99    |        | 16.12   | 17.27   | 0.18    |        | 0.27   | 0.29   | 0.25    |        |
| Ecuador            | (0.14,  | (0.41,  | (0.44,  | <0.001 | (1.75,   | (3.29,   | (0.55,  | <0.001 | (11.66, | (13.79, | (0.01,  | 0.036  | (0.00, | (0.02, | (0.07,  | 0.007  |

|           |         |         |         |        |          |          |         |        |         |         |         |        |        |        |         |        |
|-----------|---------|---------|---------|--------|----------|----------|---------|--------|---------|---------|---------|--------|--------|--------|---------|--------|
|           | 3.35)   | 2.70)   | 1.33)   |        | 7.75)    | 7.83)    | 1.44)   |        | 21.87)  | 21.41)  | 0.35)   |        | 2.27)  | 1.37)  | 0.43)   |        |
|           | 0.55    | 0.55    | -0.02   |        | 0.04     | 0.06     |         |        | 17.84   | 8.30    | -2.62   |        | 0.30   | 0.14   | -2.61   |        |
| Ethiopia  | (0.44,  | (0.48,  | (-0.16, | 0.786  | (0.02,   | (0.04,   | —       | —      | (17.22, | (8.02,  | (-2.78, | <0.001 | (0.22, | (0.10, | (-2.94, | <0.001 |
|           | 0.68)   | 0.63)   | 0.12)   |        | 0.09)    | 0.09)    |         |        | 18.49)  | 8.58)   | -2.46)  |        | 0.39)  | 0.18)  | -2.28)  |        |
|           | 2.29    | 2.56    | 0.38    |        | 15.24    | 16.73    | 0.25    |        | 14.91   | 13.74   | -0.27   |        | 0.24   | 0.22   | -0.26   |        |
| Fiji      | (0.92,  | (1.19,  | (0.22,  | <0.001 | (11.07,  | (12.81,  | (0.09,  | 0.003  | (10.99, | (10.17, | (-0.63, | 0.136  | (0.00, | (0.00, | (-0.51, | 0.045  |
|           | 4.81)   | 4.84)   | 0.53)   |        | 20.50)   | 21.49)   | 0.42)   |        | 19.85)  | 18.16)  | 0.09)   |        | 1.79)  | 1.48)  | -0.01)  |        |
|           | 1.67    | 4.92    | 3.78    |        | 10.44    | 36.38    | 4.34    |        | 9.36    | 6.45    | -1.39   |        | 0.16   | 0.11   | -1.34   |        |
| Finland   | (1.15,  | (3.95,  | (3.50,  | <0.001 | (9.11,   | (33.71,  | (3.68,  | <0.001 | (8.05,  | (5.33,  | (-1.85, | <0.001 | (0.04, | (0.01, | (-1.98, | <0.001 |
|           | 2.38)   | 6.09)   | 4.06)   |        | 11.94)   | 39.23)   | 5.01)   |        | 10.84)  | 7.75)   | -0.93)  |        | 0.51)  | 0.45)  | -0.69)  |        |
|           | 0.64    | 1.15    | 2.02    |        | 2.04     | 3.38     | 1.36    |        | 12.79   | 5.69    | -2.82   |        | 0.22   | 0.10   | -2.77   |        |
| France    | (0.54,  | (1.01,  | (1.89,  | <0.001 | (1.86,   | (3.15,   | (0.40,  | 0.005  | (12.33, | (5.36,  | (-3.63, | <0.001 | (0.16, | (0.06, | (-3.71, | <0.001 |
|           | 0.75)   | 1.31)   | 2.16)   |        | 2.23)    | 3.63)    | 2.33)   |        | 13.27)  | 6.03)   | -2.00)  |        | 0.29)  | 0.15)  | -1.82)  |        |
|           | 0.99    | 1.01    | 0.06    |        | 5.31     | 3.82     | -1.18   |        | 14.38   | 10.07   | -1.25   |        | 0.24   | 0.17   | -1.33   |        |
| Gabon     | (0.23,  | (0.41,  | (-0.04, | 0.254  | (3.05,   | (2.46,   | (-1.52, | <0.001 | (10.71, | (7.88,  | (-1.55, | <0.001 | (0.00, | (0.01, | (-1.98, | <0.001 |
|           | 2.84)   | 2.10)   | 0.17)   |        | 8.62)    | 5.65)    | -0.83)  |        | 18.98)  | 12.70)  | -0.96)  |        | 1.67)  | 0.88)  | -0.67)  |        |
|           | 0.75    | 0.81    | 0.21    |        | 2.42     | 3.47     | 1.43    |        | 10.49   | 13.57   | 1.01    |        | 0.17   | 0.22   | 0.93    |        |
| Gambia    | (0.12,  | (0.32,  | (0.07,  | 0.003  | (0.91,   | (2.25,   | (0.97,  | <0.001 | (7.41,  | (11.29, | (-0.14, | 0.085  | (0.00, | (0.03, | (-0.10, | 0.077  |
|           | 2.63)   | 1.74)   | 0.36)   |        | 5.19)    | 5.13)    | 1.88)   |        | 14.58)  | 16.22)  | 2.17)   |        | 1.71)  | 0.88)  | 1.98)   |        |
|           | 10.46   | 15.03   | 1.27    |        | 80.68    | 117.55   | 1.32    |        | 5.53    | 17.00   | 3.81    |        | 0.09   | 0.28   | 3.77    |        |
| Georgia   | (9.15,  | (12.98, | (1.20,  | <0.001 | (76.96,  | (111.83, | (1.24,  | <0.001 | (4.58,  | (14.73, | (2.39,  | <0.001 | (0.01, | (0.07, | (2.04,  | <0.001 |
|           | 11.92)  | 17.36)  | 1.35)   |        | 84.55)   | 123.52)  | 1.40)   |        | 6.63)   | 19.54)  | 5.26)   |        | 0.34)  | 0.84)  | 5.53)   |        |
|           | 0.42    | 1.47    | 4.67    |        |          | 7.15     |         |        | 13.95   | 8.20    | -1.86   |        | 0.24   | 0.14   | -1.82   |        |
| Germany   | (0.35,  | (1.33,  | (4.39,  | <0.001 | —        | (6.85,   | —       | —      | (13.53, | (7.86,  | (-2.49, | <0.001 | (0.19, | (0.10, | (-2.75, | <0.001 |
|           | 0.50)   | 1.62)   | 4.95)   |        |          | 7.46)    |         |        | 14.38)  | 8.55)   | -1.23)  |        | 0.30)  | 0.19)  | -0.88)  |        |
|           | 0.70    | 0.88    | 0.79    |        | 2.25     | 3.82     | 1.86    |        | 13.45   | 13.34   | -0.03   |        | 0.22   | 0.22   | 0.05    |        |
| Ghana     | (0.49,  | (0.72,  | (0.65,  | <0.001 | (1.83,   | (3.48,   | (1.09,  | <0.001 | (12.50, | (12.73, | (-0.22, | 0.772  | (0.11, | (0.15, | (-0.25, | 0.761  |
|           | 0.98)   | 1.06)   | 0.93)   |        | 2.74)    | 4.19)    | 2.63)   |        | 14.45)  | 13.98)  | 0.16)   |        | 0.39)  | 0.32)  | 0.34)   |        |
|           | 0.60    | 1.67    | 3.59    |        | 1.05     | 8.89     | 5.75    |        | 9.37    | 10.44   | 0.28    |        | 0.16   | 0.18   | 0.35    |        |
| Greece    | (0.38,  | (1.25,  | (3.42,  | <0.001 | (0.75,   | (7.96,   | (3.97,  | <0.001 | (8.42,  | (9.32,  | (-0.21, | 0.262  | (0.06, | (0.06, | (-0.03, | 0.067  |
|           | 0.90)   | 2.21)   | 3.76)   |        | 1.43)    | 9.91)    | 7.56)   |        | 10.40)  | 11.68)  | 0.77)   |        | 0.35)  | 0.42)  | 0.73)   |        |
|           | 25.54   | 25.49   | -0.01   |        | 202.80   | 200.94   | -0.05   |        | 22.81   | 13.20   | -1.83   |        | 0.40   | 0.23   | -1.88   |        |
| Greenland | (10.21, | (8.75,  | (-0.08, | 0.789  | (152.69, | (145.56, | (-0.13, | 0.207  | (8.39,  | (2.51,  | (-2.02, | <0.001 | (0.00, | (0.00, | (-2.24, | <0.001 |

|               |         |         |         |        |          |          |         |        |         |         |         |        |        |        |         |        |
|---------------|---------|---------|---------|--------|----------|----------|---------|--------|---------|---------|---------|--------|--------|--------|---------|--------|
|               | 57.49)  | 60.51)  | 0.06)   |        | 267.22)  | 272.44)  | 0.03)   |        | 54.15)  | 43.24)  | -1.65)  |        | 22.67) | 22.93) | -1.52)  |        |
|               | 1.55    | 2.09    | 0.98    |        | 8.79     | 12.16    | 1.02    |        | 25.67   | 22.27   | -0.53   |        | 0.44   | 0.38   | -0.53   |        |
| Grenada       | (0.00,  | (0.03,  | (0.70,  | <0.001 | (1.45,   | (3.61,   | (0.66,  | <0.001 | (10.95, | (10.00, | (-1.22, | 0.128  | (0.00, | (0.00, | (-1.29, | 0.180  |
|               | 16.87)  | 14.50)  | 1.27)   |        | 28.86)   | 30.15)   | 1.38)   |        | 51.90)  | 43.39)  | 0.15)   |        | 14.88) | 11.48) | 0.24)   |        |
|               | 3.25    | 3.95    | 0.67    |        | 22.05    | 26.16    | 0.58    |        | 29.40   | 48.53   | 1.72    |        | 0.46   | 0.79   | 1.85    |        |
| Guam          | (0.41,  | (0.59,  | (0.63,  | <0.001 | (11.89,  | (14.56,  | (0.41,  | <0.001 | (17.51, | (32.54, | (1.05,  | <0.001 | (0.00, | (0.00, | (1.17,  | <0.001 |
|               | 12.04)  | 13.43)  | 0.71)   |        | 37.56)   | 43.38)   | 0.74)   |        | 46.53)  | 69.84)  | 2.39)   |        | 7.38)  | 8.16)  | 2.52)   |        |
|               | 0.52    | 0.71    | 1.07    |        | 0.96     | 1.12     | 0.37    |        | 7.50    | 5.83    | -0.93   |        | 0.13   | 0.10   | -1.15   |        |
| Guatemala     | (0.28,  | (0.53,  | (0.96,  | <0.001 | (0.60,   | (0.88,   | (0.26,  | <0.001 | (6.49,  | (5.29,  | (-1.59, | 0.007  | (0.03, | (0.04, | (-1.64, | <0.001 |
|               | 0.89)   | 0.93)   | 1.17)   |        | 1.46)    | 1.41)    | 0.47)   |        | 8.61)   | 6.40)   | -0.26)  |        | 0.36)  | 0.20)  | -0.67)  |        |
|               | 0.73    | 0.85    | 0.52    |        | 2.31     | 3.70     | 1.26    |        | 14.07   | 16.65   | 0.60    |        | 0.23   | 0.27   | 0.55    |        |
| Guinea        | (0.40,  | (0.60,  | (0.39,  | <0.001 | (1.65,   | (3.10,   | (0.84,  | <0.001 | (12.52, | (15.50, | (0.40,  | <0.001 | (0.07, | (0.14, | (0.15,  | 0.007  |
|               | 1.22)   | 1.18)   | 0.65)   |        | 3.15)    | 4.37)    | 1.69)   |        | 15.78)  | 17.87)  | 0.79)   |        | 0.57)  | 0.48)  | 0.96)   |        |
|               | 0.82    | 0.86    | 0.12    |        | 3.42     | 3.60     | -0.00   |        | 17.97   | 18.77   | 0.15    |        | 0.29   | 0.31   | 0.19    |        |
| Guinea-Bissau | (0.14,  | (0.32,  | (0.03,  | 0.010  | (1.62,   | (2.29,   | (-0.28, | 0.994  | (13.85, | (15.85, | (0.07,  | <0.001 | (0.01, | (0.05, | (0.04,  | 0.016  |
|               | 2.67)   | 1.90)   | 0.21)   |        | 6.36)    | 5.42)    | 0.28)   |        | 23.03)  | 22.11)  | 0.23)   |        | 1.83)  | 1.10)  | 0.35)   |        |
|               | 1.57    | 1.97    | 0.75    |        | 7.40     | 10.04    | 0.45    |        | 65.54   | 47.70   | -1.17   |        | 1.10   | 0.81   | -1.14   |        |
| Guyana        | (0.49,  | (0.72,  | (0.49,  | <0.001 | (4.53,   | (6.63,   | (-0.32, | 0.255  | (56.94, | (40.24, | (-2.22, | 0.031  | (0.26, | (0.13, | (-2.20, | 0.039  |
|               | 3.84)   | 4.39)   | 1.02)   |        | 11.43)   | 14.60)   | 1.23)   |        | 75.15)  | 56.19)  | -0.11)  |        | 3.16)  | 2.73)  | -0.06)  |        |
|               | 1.08    | 1.11    | 0.03    |        | 5.24     | 3.92     | -1.00   |        | 27.37   | 23.09   | -0.53   |        | 0.46   | 0.39   | -0.52   |        |
| Haiti         | (0.69,  | (0.84,  | (-0.13, | 0.688  | (4.31,   | (3.39,   | (-1.49, | <0.001 | (25.28, | (21.81, | (-0.96, | 0.015  | (0.22, | (0.24, | (-0.86, | 0.004  |
|               | 1.61)   | 1.44)   | 0.19)   |        | 6.32)    | 4.51)    | -0.51)  |        | 29.58)  | 24.43)  | -0.10)  |        | 0.84)  | 0.60)  | -0.17)  |        |
|               | 0.54    | 0.70    | 0.89    |        | 0.99     | 1.02     | 0.08    |        | 5.92    | 2.90    | -2.47   |        | 0.10   | 0.05   | -2.37   |        |
| Honduras      | (0.23,  | (0.46,  | (0.78,  | <0.001 | (0.52,   | (0.71,   | (-0.09, | 0.372  | (4.76,  | (2.39,  | (-2.97, | <0.001 | (0.01, | (0.01, | (-3.02, | <0.001 |
|               | 1.07)   | 1.02)   | 1.00)   |        | 1.69)    | 1.42)    | 0.25)   |        | 7.29)   | 3.50)   | -1.97)  |        | 0.46)  | 0.20)  | -1.72)  |        |
|               | 16.56   | 25.71   | 1.52    |        | 129.33   | 203.90   | 1.57    |        | 24.67   | 17.52   | -1.15   |        | 0.43   | 0.30   | -1.19   |        |
| Hungary       | (15.29, | (23.95, | (1.48,  | <0.001 | (125.85, | (199.02, | (1.49,  | <0.001 | (23.14, | (16.06, | (-1.84, | 0.001  | (0.25, | (0.14, | (-1.88, | 0.001  |
|               | 17.90)  | 27.58)  | 1.56)   |        | 132.88)  | 208.88)  | 1.65)   |        | 26.28)  | 19.09)  | -0.46)  |        | 0.70)  | 0.59)  | -0.50)  |        |
|               | 0.36    | 1.58    | 5.35    |        |          | 9.14     |         |        | 11.00   | 8.09    | -1.03   |        | 0.18   | 0.14   | -0.87   |        |
| Iceland       | (0.00,  | (0.19,  | (5.02,  | <0.001 | —        | (4.71,   | —       | —      | (5.58,  | (3.86,  | (-1.49, | <0.001 | (0.00, | (0.00, | (-0.87, | <0.001 |
|               | 4.51)   | 6.30)   | 5.68)   |        |          | 16.44)   |         |        | 19.60)  | 15.28)  | -0.58)  |        | 4.19)  | 4.00)  | -0.87)  |        |
|               | 0.48    | 0.62    | 0.83    |        |          | 1.48     |         |        | 8.65    | 7.84    | -0.39   |        | 0.15   | 0.13   | -0.50   |        |
| India         | (0.45,  | (0.60,  | (0.67,  | <0.001 | —        | (1.45,   | —       | —      | (8.55,  | (7.77,  | (-0.74, | 0.032  | (0.13, | (0.12, | (-1.23, | 0.185  |

|                            |         |         |         |        |          |          |         |        |         |         |         |        |        |        |         |        |
|----------------------------|---------|---------|---------|--------|----------|----------|---------|--------|---------|---------|---------|--------|--------|--------|---------|--------|
|                            | 0.50)   | 0.65)   | 0.99)   |        | 1.51)    |          |         | 8.75)  | 7.91)   | -0.03)  |         | 0.16)  | 0.14)  | 0.24)  |         |        |
|                            | 1.07    | 1.24    | 0.51    |        | 6.29     | 7.33     | 0.53    | 4.85   | 3.40    | -1.20   |         | 0.08   | 0.06   | -0.97  |         |        |
| Indonesia                  | (0.99,  | (1.17,  | (0.41,  | <0.001 | (6.10,   | (7.17,   | (0.45,  | <0.001 | (4.69,  | (3.29,  | (-1.33, | <0.001 | (0.06, | (0.04, | (-0.97, | <0.001 |
|                            | 1.14)   | 1.31)   | 0.60)   |        | 6.48)    | 7.49)    | 0.62)   |        | 5.01)   | 3.52)   | -1.08)  |        | 0.11)  | 0.07)  | -0.97)  |        |
| Iran (Islamic Republic of) | 1.91    | 2.14    | 0.41    |        | 12.08    | 13.68    | 0.44    |        | 20.62   | 16.72   | -0.72   |        | 0.34   | 0.27   | -0.79   |        |
|                            | (1.72,  | (2.00,  | (0.34,  | <0.001 | (11.57,  | (13.34,  | (0.24,  | <0.001 | (20.01, | (16.28, | (-0.82, | <0.001 | (0.27, | (0.22, | (-1.02, | <0.001 |
|                            | 2.12)   | 2.30)   | 0.49)   |        | 12.60)   | 14.03)   | 0.63)   |        | 21.25)  | 17.16)  | -0.63)  |        | 0.43)  | 0.34)  | -0.56)  |        |
| Iraq                       | 2.08    | 2.03    | -0.07   |        | 12.86    | 12.86    | -0.00   |        | 8.37    | 5.93    | -1.20   |        | 0.14   | 0.10   | -1.30   |        |
|                            | (1.72,  | (1.82,  | (-0.16, | 0.096  | (11.90,  | (12.31,  | (-0.20, | 0.966  | (7.63,  | (5.57,  | (-1.37, | <0.001 | (0.06, | (0.06, | (-1.53, | <0.001 |
|                            | 2.50)   | 2.26)   | 0.01)   |        | 13.87)   | 13.44)   | 0.19)   |        | 9.16)   | 6.31)   | -1.03)  |        | 0.29)  | 0.17)  | -1.07)  |        |
| Ireland                    | 0.59    | 2.08    | 4.45    |        | 1.91     | 12.50    | 6.67    |        | 9.49    | 6.63    | -1.21   |        | 0.16   | 0.11   | -1.32   |        |
|                            | (0.25,  | (1.45,  | (4.21,  | <0.001 | (1.25,   | (10.96,  | (5.10,  | <0.001 | (7.92,  | (5.45,  | (-1.88, | 0.001  | (0.02, | (0.01, | (-2.48, | 0.027  |
|                            | 1.17)   | 2.91)   | 4.68)   |        | 2.81)    | 14.21)   | 8.26)   |        | 11.28)  | 8.00)   | -0.53)  |        | 0.56)  | 0.45)  | -0.15)  |        |
| Israel                     | 0.61    | 0.92    | 1.42    |        | 2.14     | 1.97     | -0.39   |        | 8.69    | 4.95    | -2.00   |        | 0.14   | 0.08   | -1.94   |        |
|                            | (0.31,  | (0.62,  | (1.25,  | <0.001 | (1.54,   | (1.53,   | (-0.82, | 0.080  | (7.42,  | (4.21,  | (-2.67, | <0.001 | (0.03, | (0.01, | (-2.99, | <0.001 |
|                            | 1.09)   | 1.32)   | 1.60)   |        | 2.90)    | 2.51)    | 0.05)   |        | 10.12)  | 5.77)   | -1.31)  |        | 0.45)  | 0.26)  | -0.88)  |        |
| Italy                      | 45.10   | 49.29   | 0.32    |        | 360.34   | 396.91   | 0.36    |        | 14.28   | 9.95    | -1.37   |        | 0.24   | 0.16   | -1.48   |        |
|                            | (44.21, | (48.25, | (0.20,  | <0.001 | (357.80, | (394.02, | (0.23,  | <0.001 | (13.78, | (9.47,  | (-1.64, | <0.001 | (0.18, | (0.11, | (-1.77, | <0.001 |
|                            | 46.01)  | 50.35)  | 0.45)   |        | 362.90)  | 399.83)  | 0.49)   |        | 14.80)  | 10.44)  | -1.09)  |        | 0.31)  | 0.24)  | -1.19)  |        |
| Jamaica                    | 1.09    | 1.51    | 1.12    |        | 5.31     | 7.08     | 0.84    |        | 5.70    | 8.02    | 1.29    |        | 0.09   | 0.13   | 1.28    |        |
|                            | (0.51,  | (0.89,  | (1.02,  | <0.001 | (3.80,   | (5.60,   | (0.47,  | <0.001 | (4.30,  | (6.49,  | (-0.16, | 0.082  | (0.00, | (0.01, | (-0.38, | 0.132  |
|                            | 2.09)   | 2.40)   | 1.22)   |        | 7.24)    | 8.83)    | 1.21)   |        | 7.47)   | 9.81)   | 2.77)   |        | 0.67)  | 0.57)  | 2.97)   |        |
| Japan                      | 54.13   | 59.54   | 0.35    |        | 435.37   | 482.37   | 0.37    |        | 9.30    | 4.34    | -2.59   |        | 0.15   | 0.07   | -2.72   |        |
|                            | (53.45, | (58.73, | (0.30,  | <0.001 | (433.46, | (480.13, | (0.33,  | <0.001 | (9.02,  | (4.13,  | (-2.85, | <0.001 | (0.12, | (0.04, | (-3.01, | <0.001 |
|                            | 54.81)  | 60.35)  | 0.39)   |        | 437.29)  | 484.61)  | 0.42)   |        | 9.59)   | 4.57)   | -2.34)  |        | 0.19)  | 0.10)  | -2.42)  |        |
| Jordan                     | 2.16    | 2.58    | 0.63    |        | 14.23    | 16.35    | 0.45    |        | 10.80   | 5.76    | -2.13   |        | 0.18   | 0.10   | -2.00   |        |
|                            | (1.40,  | (2.14,  | (0.55,  | <0.001 | (12.03,  | (15.21,  | (-0.05, | 0.078  | (9.04,  | (5.11,  | (-2.68, | <0.001 | (0.03, | (0.03, | (-2.78, | <0.001 |
|                            | 3.21)   | 3.07)   | 0.71)   |        | 16.73)   | 17.56)   | 0.95)   |        | 12.83)  | 6.48)   | -1.58)  |        | 0.69)  | 0.24)  | -1.21)  |        |
| Kazakhstan                 | 10.47   | 13.46   | 0.87    |        | 81.74    | 104.91   | 0.85    |        | 3.26    | 3.87    | 0.52    |        | 0.05   | 0.06   | 0.29    |        |
|                            | (9.72,  | (12.64, | (0.80,  | <0.001 | (79.61,  | (102.63, | (0.80,  | <0.001 | (2.84,  | (3.43,  | (0.01,  | 0.045  | (0.01, | (0.02, | (-0.63, | 0.536  |
|                            | 11.27)  | 14.33)  | 0.93)   |        | 83.93)   | 107.23)  | 0.89)   |        | 3.72)   | 4.37)   | 1.03)   |        | 0.14)  | 0.16)  | 1.22)   |        |
| Kenya                      | 0.66    | 0.69    | 0.14    |        | 2.00     | 1.98     | -0.04   |        | 12.53   | 10.58   | -0.59   |        | 0.21   | 0.18   | -0.57   |        |
|                            | (0.48,  | (0.57,  | (0.05,  | 0.003  | (1.65,   | (1.78,   | (-0.15, | 0.504  | (11.75, | (10.14, | (-0.72, | <0.001 | (0.12, | (0.12, | (-0.73, | <0.001 |

|              |         |         |         |        |          |          |         |        |         |         |         |        |        |        |         |        |
|--------------|---------|---------|---------|--------|----------|----------|---------|--------|---------|---------|---------|--------|--------|--------|---------|--------|
|              | 0.88)   | 0.81)   | 0.24)   |        | 2.41)    | 2.21)    | 0.07)   |        | 13.35)  | 11.04)  | -0.46)  |        | 0.35)  | 0.25)  | -0.41)  |        |
|              | 2.70)   | 2.48)   | -0.34)  |        | 18.68)   | 16.09)   | -0.73)  |        | 42.92)  | 44.98)  | 0.13)   |        | 0.69)  | 0.73)  | 0.17)   |        |
| Kiribati     | (0.02,  | (0.10,  | (-0.43, | <0.001 | (5.97,   | (6.63,   | (-1.15, | 0.001  | (22.83, | (28.12, | (-0.01, | 0.061  | (0.00, | (0.00, | (0.08,  | <0.001 |
|              | 20.16)  | 12.87)  | -0.24)  |        | 44.67)   | 32.81)   | -0.31)  |        | 74.88)  | 68.55)  | 0.27)   |        | 16.60) | 9.80)  | 0.26)   |        |
|              | 4.66)   | 5.26)   | 0.39)   |        | 32.34)   | 36.88)   | 0.50)   |        | 10.58)  | 9.24)   | -0.51)  |        | 0.17)  | 0.15)  | -0.49)  |        |
| Kuwait       | (3.37,  | (4.36,  | (-0.06, | 0.092  | (28.83,  | (34.68,  | (0.19,  | 0.002  | (8.53,  | (7.89,  | (-1.99, | 0.507  | (0.01, | (0.03, | (-1.45, | 0.317  |
|              | 6.35)   | 6.34)   | 0.84)   |        | 36.23)   | 39.25)   | 0.81)   |        | 13.03)  | 10.81)  | 1.00)   |        | 0.87)  | 0.55)  | 0.47)   |        |
|              | 9.28)   | 8.94)   | -0.13)  |        | 72.76)   | 68.39)   | -0.23)  |        | 8.91)   | 4.40)   | -2.35)  |        | 0.15)  | 0.07)  | -2.71)  |        |
| Kyrgyzstan   | (7.89,  | (7.84,  | (-0.17, | <0.001 | (68.68,  | (65.25,  | (-0.32, | <0.001 | (7.57,  | (3.64,  | (-3.43, | <0.001 | (0.03, | (0.01, | (-3.86, | <0.001 |
|              | 10.86)  | 10.16)  | -0.09)  |        | 77.02)   | 71.65)   | -0.14)  |        | 10.44)  | 5.29)   | -1.25)  |        | 0.49)  | 0.28)  | -1.54)  |        |
| Lao People's | 0.93)   | 1.14)   | 0.69)   |        | 5.55)    | 6.67)    | 0.71)   |        | 3.37)   | 3.71)   | 0.36)   |        | 0.06)  | 0.06)  | 0.03)   |        |
| Democratic   | (0.49,  | (0.79,  | (0.63,  | <0.001 | (4.32,   | (5.76,   | (0.63,  | <0.001 | (2.48,  | (3.06,  | (0.19,  | <0.001 | (0.00, | (0.01, | (-0.18, | 0.799  |
| Republic     | 1.62)   | 1.59)   | 0.76)   |        | 7.03)    | 7.69)    | 0.78)   |        | 4.49)   | 4.47)   | 0.54)   |        | 0.42)  | 0.24)  | 0.24)   |        |
|              | 14.04)  | 20.90)  | 1.44)   |        | 109.28)  | 165.27)  | 1.51)   |        | 4.38)   | 5.22)   | 0.69)   |        | 0.07)  | 0.09)  | 0.86)   |        |
| Latvia       | (11.81, | (17.43, | (1.20,  | <0.001 | (102.94, | (155.63, | (1.23,  | <0.001 | (3.17,  | (3.57,  | (-0.99, | 0.423  | (0.00, | (0.00, | (-1.67, | 0.508  |
|              | 16.59)  | 24.96)  | 1.68)   |        | 115.93)  | 175.47)  | 1.80)   |        | 5.92)   | 7.49)   | 2.40)   |        | 0.57)  | 1.05)  | 3.46)   |        |
|              | 2.19)   | 2.43)   | 0.38)   |        | 13.61)   | 15.73)   | 0.48)   |        | 34.14)  | 27.13)  | -0.77)  |        | 0.57)  | 0.45)  | -0.79)  |        |
| Lebanon      | (1.40,  | (1.83,  | (0.31,  | <0.001 | (11.42,  | (14.17,  | (0.17,  | 0.003  | (30.84, | (24.91, | (-0.89, | <0.001 | (0.22, | (0.21, | (-0.98, | <0.001 |
|              | 3.29)   | 3.21)   | 0.46)   |        | 16.09)   | 17.45)   | 0.79)   |        | 37.71)  | 29.52)  | -0.65)  |        | 1.23)  | 0.88)  | -0.60)  |        |
|              | 0.68)   | 0.98)   | 1.29)   |        | 1.97)    | 2.76)    | 1.09)   |        | 13.14)  | 16.96)  | 0.86)   |        | 0.22)  | 0.28)  | 0.86)   |        |
| Lesotho      | (0.18,  | (0.45,  | (1.15,  | <0.001 | (0.94,   | (1.76,   | (0.90,  | <0.001 | (10.47, | (14.42, | (0.74,  | <0.001 | (0.01, | (0.05, | (0.64,  | <0.001 |
|              | 1.80)   | 1.88)   | 1.42)   |        | 3.64)    | 4.13)    | 1.27)   |        | 16.34)  | 19.83)  | 0.99)   |        | 1.10)  | 0.90)  | 1.08)   |        |
|              | 0.69)   | 0.70)   | 0.05)   |        | 2.19)    | 1.20)    | -1.67)  |        | 13.48)  | 13.62)  | -0.02)  |        | 0.22)  | 0.22)  | -0.04)  |        |
| Liberia      | (0.20,  | (0.37,  | (-0.09, | 0.464  | (1.19,   | (0.74,   | (-2.57, | <0.001 | (10.83, | (12.04, | (-0.29, | 0.894  | (0.01, | (0.06, | (-0.50, | 0.883  |
|              | 1.74)   | 1.21)   | 0.20)   |        | 3.71)    | 1.86)    | -0.76)  |        | 16.61)  | 15.36)  | 0.25)   |        | 1.01)  | 0.57)  | 0.43)   |        |
|              | 2.41)   | 2.24)   | -0.27)  |        | 15.47)   | 14.64)   | -0.21)  |        | 26.87)  | 23.17)  | -0.51)  |        | 0.44)  | 0.38)  | -0.53)  |        |
| Libya        | (1.66,  | (1.75,  | (-0.32, | <0.001 | (13.38,  | (13.37,  | (-0.53, | 0.198  | (24.35, | (21.49, | (-0.78, | <0.001 | (0.17, | (0.20, | (-0.99, | 0.023  |
|              | 3.40)   | 2.83)   | -0.21)  |        | 17.79)   | 16.01)   | 0.11)   |        | 29.60)  | 24.96)  | -0.24)  |        | 0.96)  | 0.68)  | -0.07)  |        |
|              | 21.28)  | 27.53)  | 0.95)   |        | 167.91)  | 218.25)  | 0.94)   |        | 4.52)   | 8.67)   | 2.27)   |        | 0.07)  | 0.15)  | 2.55)   |        |
| Lithuania    | (18.94, | (24.20, | (0.66,  | <0.001 | (161.25, | (208.82, | (0.73,  | <0.001 | (3.48,  | (6.83,  | (0.97,  | 0.001  | (0.00, | (0.01, | (0.90,  | 0.002  |
|              | 23.82)  | 31.25)  | 1.25)   |        | 174.79)  | 228.05)  | 1.16)   |        | 5.79)   | 10.89)  | 3.58)   |        | 0.42)  | 0.82)  | 4.22)   |        |
|              | 1.25)   | 3.46)   | 3.70)   |        | 6.78)    | 24.44)   | 4.76)   |        | 13.48)  | 8.95)   | -1.47)  |        | 0.23)  | 0.15)  | -1.55)  |        |
| Luxembourg   | (0.15,  | (1.50,  | (3.38,  | <0.001 | (3.44,   | (18.76,  | (3.71,  | <0.001 | (8.21,  | (5.44,  | (-2.04, | <0.001 | (0.00, | (0.00, | (-2.27, | <0.001 |

|                   |        |        |         |        |        |         |         |        |         |         |         |        |        |        |         |        |
|-------------------|--------|--------|---------|--------|--------|---------|---------|--------|---------|---------|---------|--------|--------|--------|---------|--------|
|                   | 5.49)  | 7.24)  | 4.02)   |        | 12.72) | 31.65)  | 5.82)   |        | 21.35)  | 14.19)  | -0.90)  |        | 4.00)  | 2.65)  | -0.83)  |        |
|                   | 1.09   | 0.87   | -0.79   |        | 5.50   | 3.65    | -1.45   |        | 51.45   | 29.84   | -1.95   |        | 0.86   | 0.50   | -1.96   |        |
| Madagascar        | (0.78, | (0.70, | (-1.00, | <0.001 | (4.74, | (3.26,  | (-2.24, | <0.001 | (49.31, | (28.80, | (-2.56, | <0.001 | (0.60, | (0.37, | (-2.67, | <0.001 |
|                   | 1.47)  | 1.08)  | -0.58)  |        | 6.34)  | 4.08)   | -0.66)  |        | 53.68)  | 30.92)  | -1.33)  |        | 1.20)  | 0.66)  | -1.24)  |        |
|                   | 0.50   | 0.50   | -0.04   |        |        |         |         |        | 15.41   | 11.53   | -0.99   |        | 0.26   | 0.19   | -0.97   |        |
| Malawi            | (0.28, | (0.34, | (-0.23, | 0.717  | —      | —       | —       | —      | (14.11, | (10.75, | (-1.24, | <0.001 | (0.11, | (0.10, | (-1.21, | <0.001 |
|                   | 0.83)  | 0.71)  | 0.16)   |        |        |         |         |        | 16.81)  | 12.36)  | -0.74)  |        | 0.51)  | 0.33)  | -0.72)  |        |
|                   | 1.38   | 1.64   | 0.57    |        | 8.44   | 10.95   | 1.00    |        | 5.28    | 5.99    | 0.48    |        | 0.09   | 0.10   | 0.38    |        |
| Malaysia          | (1.12, | (1.43, | (0.54,  | <0.001 | (7.75, | (10.41, | (0.81,  | <0.001 | (4.76,  | (5.59,  | (0.02,  | 0.040  | (0.03, | (0.05, | (-0.63, | 0.463  |
|                   | 1.69)  | 1.87)  | 0.60)   |        | 9.16)  | 11.52)  | 1.20)   |        | 5.84)   | 6.41)   | 0.95)   |        | 0.19)  | 0.17)  | 1.39)   |        |
|                   | 1.27   | 1.44   | 0.41    |        | 7.58   | 9.00    | 0.45    |        | 8.73    | 4.87    | -1.90   |        | 0.15   | 0.08   | -2.13   |        |
| Maldives          | (0.02, | (0.39, | (0.34,  | <0.001 | (2.11, | (6.03,  | (0.24,  | <0.001 | (3.15,  | (2.53,  | (-2.36, | <0.001 | (0.00, | (0.00, | (-2.95, | <0.001 |
|                   | 9.63)  | 4.59)  | 0.49)   |        | 19.60) | 13.62)  | 0.66)   |        | 20.28)  | 9.07)   | -1.44)  |        | 7.78)  | 2.80)  | -1.31)  |        |
|                   | 0.71   | 0.77   | 0.27    |        | 2.30   | 2.44    | 0.02    |        | 18.72   | 17.67   | -0.20   |        | 0.31   | 0.29   | -0.16   |        |
| Mali              | (0.42, | (0.58, | (0.13,  | <0.001 | (1.73, | (2.05,  | (-0.15, | 0.834  | (17.18, | (16.75, | (-0.46, | 0.130  | (0.14, | (0.18, | (-0.27, | 0.005  |
|                   | 1.12)  | 1.02)  | 0.41)   |        | 3.01)  | 2.89)   | 0.18)   |        | 20.38)  | 18.64)  | 0.06)   |        | 0.60)  | 0.44)  | -0.05)  |        |
|                   | 0.32   | 1.09   | 4.63    |        |        | 3.99    |         |        | 5.53    | 6.43    | 0.51    |        | 0.09   | 0.11   | 0.58    |        |
| Malta             | (0.00, | (0.09, | (3.99,  | <0.001 | —      | (1.59,  | —       | —      | (2.32,  | (2.93,  | (0.13,  | 0.008  | (0.00, | (0.00, | (-0.05, | 0.073  |
|                   | 3.73)  | 5.53)  | 5.27)   |        |        | 9.29)   |         |        | 11.31)  | 12.88)  | 0.88)   |        | 3.34)  | 4.10)  | 1.22)   |        |
|                   | 2.27   | 2.31   | 0.04    |        | 14.61  | 14.90   | -0.00   |        | 28.09   | 29.54   | 0.17    |        | 0.46   | 0.49   | 0.19    |        |
| Marshall Islands  | (0.00, | (0.00, | (-0.19, | 0.742  | (1.88, | (3.63,  | (-0.16, | 0.984  | (8.72,  | (11.89, | (0.06,  | 0.003  | (0.00, | (0.00, | (0.07,  | 0.002  |
|                   | 31.52) | 20.58) | 0.27)   |        | 52.55) | 40.64)  | 0.16)   |        | 70.16)  | 61.13)  | 0.28)   |        | 28.12) | 17.11) | 0.31)   |        |
|                   | 0.94   | 0.92   | -0.09   |        | 4.18   | 3.68    | -0.46   |        | 14.02   | 11.19   | -0.72   |        | 0.23   | 0.18   | -0.72   |        |
| Mauritania        | (0.36, | (0.49, | (-0.21, | 0.167  | (2.72, | (2.70,  | (-0.71, | <0.001 | (11.47, | (9.59,  | (-0.87, | <0.001 | (0.02, | (0.03, | (-0.95, | <0.001 |
|                   | 2.04)  | 1.59)  | 0.04)   |        | 6.15)  | 4.92)   | -0.22)  |        | 17.01)  | 13.00)  | -0.56)  |        | 0.99)  | 0.59)  | -0.50)  |        |
|                   | 1.43   | 1.69   | 0.55    |        | 8.36   | 10.75   | 0.96    |        | 22.97   | 19.06   | -0.31   |        | 0.39   | 0.33   | -0.31   |        |
| Mauritius         | (0.58, | (0.74, | (0.48,  | <0.001 | (5.98, | (8.06,  | (0.78,  | <0.001 | (18.93, | (15.36, | (-1.66, | 0.651  | (0.05, | (0.03, | (-1.66, | 0.658  |
|                   | 2.96)  | 3.36)  | 0.63)   |        | 11.38) | 14.09)  | 1.13)   |        | 27.64)  | 23.42)  | 1.05)   |        | 1.48)  | 1.43)  | 1.06)   |        |
|                   | 0.79   | 1.57   | 2.41    |        | 1.41   | 5.83    | 5.14    |        | 8.59    | 6.84    | -0.74   |        | 0.15   | 0.12   | -0.67   |        |
| Mexico            | (0.70, | (1.47, | (2.25,  | <0.001 | (1.27, | (5.62,  | (4.57,  | <0.001 | (8.28,  | (6.61,  | (-1.16, | 0.001  | (0.11, | (0.09, | (-1.31, | 0.044  |
|                   | 0.90)  | 1.69)  | 2.56)   |        | 1.56)  | 6.05)   | 5.71)   |        | 8.92)   | 7.07)   | -0.32)  |        | 0.20)  | 0.15)  | -0.02)  |        |
| Micronesia        | 2.29   | 2.18   | -0.20   |        | 14.61  | 13.67   | -0.25   |        | 30.22   | 30.21   | -0.01   |        | 0.49   | 0.49   | -0.04   |        |
| (Federated States | (0.03, | (0.03, | (-0.38, | 0.022  | (4.70, | (4.40,  | (-0.45, | 0.010  | (15.45, | (15.90, | (-0.07, | 0.765  | (0.00, | (0.00, | (-0.14, | 0.416  |

|             |         |         |         |        |         |          |         |        |         |         |         |        |         |        |         |        |
|-------------|---------|---------|---------|--------|---------|----------|---------|--------|---------|---------|---------|--------|---------|--------|---------|--------|
| of)         | 15.72)  | 14.57)  | -0.03)  |        | 34.64)  | 32.26)   | -0.06)  |        | 54.11)  | 52.87)  | 0.05)   |        | 12.48)  | 11.51) | 0.06)   |        |
|             | 0.85    | 4.74    | 6.16    |        | 2.67    | 33.84    | 9.29    |        | 6.59    | 5.61    | -0.55   |        | 0.11    | 0.09   | -0.61   |        |
| Monaco      | (0.00,  | (0.00,  | (5.90,  | <0.001 | (0.00,  | (8.13,   | (8.00,  | <0.001 | (0.02,  | (0.01,  | (-0.62, | <0.001 | (0.00,  | (0.00, | (-0.61, | <0.001 |
|             | 62.65)  | 52.86)  | 6.42)   |        | 65.05)  | 97.28)   | 10.60)  |        | 71.37)  | 54.53)  | -0.49)  |        | 61.56)  | 44.49) | -0.61)  |        |
|             | 9.68    | 11.09   | 0.46    |        | 76.62   | 85.87    | 0.36    |        | 10.78   | 10.98   | 0.10    |        | 0.18    | 0.18   | 0.12    |        |
| Mongolia    | (7.58,  | (9.44,  | (0.43,  | <0.001 | (70.24, | (81.27,  | (0.23,  | <0.001 | (8.65,  | (9.30,  | (-0.34, | 0.652  | (0.01,  | (0.03, | (-0.39, | 0.638  |
|             | 12.23)  | 12.97)  | 0.49)   |        | 83.45)  | 90.70)   | 0.50)   |        | 13.35)  | 12.92)  | 0.54)   |        | 0.92)   | 0.65)  | 0.63)   |        |
|             | 14.42   | 20.75   | 1.27    |        | 112.52  | 164.14   | 1.32    |        | 5.52    | 4.26    | -1.25   |        | 0.09    | 0.07   | -1.46   |        |
| Montenegro  | (10.13, | (15.19, | (1.23,  | <0.001 | (99.88, | (147.99, | (1.25,  | <0.001 | (3.01,  | (1.99,  | (-2.47, | 0.049  | (0.00,  | (0.00, | (-2.95, | 0.060  |
|             | 19.94)  | 27.80)  | 1.31)   |        | 126.33) | 181.68)  | 1.38)   |        | 9.29)   | 8.14)   | -0.00)  |        | 1.71)   | 2.12)  | 0.06)   |        |
|             | 1.72    | 1.92    | 0.39    |        | 10.97   | 12.28    | 0.42    |        | 20.74   | 15.63   | -0.93   |        | 0.35    | 0.26   | -1.03   |        |
| Morocco     | (1.46,  | (1.71,  | (0.32,  | <0.001 | (10.29, | (11.72,  | (0.33,  | <0.001 | (19.85, | (15.00, | (-1.17, | <0.001 | (0.24,  | (0.18, | (-1.30, | <0.001 |
|             | 2.01)   | 2.16)   | 0.46)   |        | 11.70)  | 12.85)   | 0.51)   |        | 21.66)  | 16.28)  | -0.68)  |        | 0.49)   | 0.36)  | -0.77)  |        |
|             | 0.48    | 0.58    | 0.63    |        |         | 0.88     |         |        | 11.46   | 12.44   | 0.30    |        | 0.19    | 0.21   | 0.35    |        |
| Mozambique  | (0.29,  | (0.43,  | (0.43,  | <0.001 | —       | (0.68,   | —       | —      | (10.47, | (11.76, | (0.18,  | <0.001 | (0.08,  | (0.13, | (0.14,  | 0.001  |
|             | 0.75)   | 0.76)   | 0.84)   |        |         | 1.11)    |         |        | 12.52)  | 13.16)  | 0.42)   |        | 0.38)   | 0.32)  | 0.56)   |        |
|             | 0.78    | 1.08    | 1.14    |        | 2.74    | 6.43     | 2.15    |        | 6.34    | 4.16    | -1.44   |        | 0.11    | 0.07   | -1.48   |        |
| Myanmar     | (0.64,  | (0.95,  | (1.06,  | <0.001 | (2.47,  | (6.10,   | (1.00,  | <0.001 | (5.96,  | (3.89,  | (-1.63, | <0.001 | (0.06,  | (0.04, | (-2.03, | <0.001 |
|             | 0.93)   | 1.23)   | 1.21)   |        | 3.04)   | 6.78)    | 3.30)   |        | 6.74)   | 4.43)   | -1.25)  |        | 0.17)   | 0.11)  | -0.91)  |        |
|             | 1.05    | 1.02    | -0.11   |        | 5.42    | 5.24     | -0.15   |        | 15.08   | 13.13   | -0.43   |        | 0.25    | 0.22   | -0.44   |        |
| Namibia     | (0.34,  | (0.48,  | (-0.27, | 0.141  | (3.40,  | (3.85,   | (-0.34, | 0.105  | (11.88, | (10.97, | (-0.70, | 0.002  | (0.01,  | (0.03, | (-0.66, | <0.001 |
|             | 2.57)   | 1.91)   | 0.04)   |        | 8.22)   | 6.98)    | 0.03)   |        | 18.96)  | 15.61)  | -0.15)  |        | 1.38)   | 0.80)  | -0.22)  |        |
|             | 2.56    | 2.32    | -0.36   |        | 17.95   | 14.95    | -0.63   |        | 38.59   | 37.27   | -0.13   |        | 0.63    | 0.61   | -0.08   |        |
| Nauru       | (0.00,  | (0.00,  | (-0.45, | <0.001 | (0.09,  | (0.05,   | (-0.89, | <0.001 | (3.00,  | (3.39,  | (-0.17, | <0.001 | (0.00,  | (0.00, | (-0.16, | 0.046  |
|             | 108.72) | 97.69)  | -0.28)  |        | 137.68) | 121.61)  | -0.37)  |        | 170.00) | 156.56) | -0.08)  |        | 104.89) | 94.30) | -0.00)  |        |
|             | 0.41    | 0.46    | 0.42    |        |         |          |         |        | 6.11    | 5.40    | -0.41   |        | 0.10    | 0.09   | -0.35   |        |
| Nepal       | (0.27,  | (0.35,  | (0.18,  | 0.001  | —       | —        | —       | —      | (5.54,  | (5.00,  | (-0.56, | <0.001 | (0.04,  | (0.05, | (-0.35, | <0.001 |
|             | 0.59)   | 0.60)   | 0.67)   |        |         |          |         |        | 6.73)   | 5.83)   | -0.27)  |        | 0.22)   | 0.17)  | -0.35)  |        |
|             | 0.71    | 0.96    | 1.03    |        | 2.44    | 2.22     | -0.39   |        | 9.17    | 6.05    | -1.43   |        | 0.16    | 0.10   | -1.59   |        |
| Netherlands | (0.52,  | (0.72,  | (0.83,  | <0.001 | (2.07,  | (1.85,   | (-0.92, | 0.155  | (8.43,  | (5.41,  | (-1.76, | <0.001 | (0.08,  | (0.04, | (-2.34, | <0.001 |
|             | 0.96)   | 1.26)   | 1.23)   |        | 2.85)   | 2.65)    | 0.15)   |        | 9.96)   | 6.74)   | -1.10)  |        | 0.30)   | 0.24)  | -0.83)  |        |
|             | 10.68   | 13.70   | 0.87    |        | 81.86   | 107.37   | 0.97    |        | 13.92   | 10.05   | -1.04   |        | 0.23    | 0.17   | -1.02   |        |
| New Zealand | (9.03,  | (11.85, | (0.79,  | <0.001 | (77.17, | (102.10, | (0.81,  | <0.001 | (12.02, | (8.48,  | (-1.73, | 0.003  | (0.05,  | (0.03, | (-1.69, | 0.003  |

|                          |         |         |         |        |          |          |         |        |         |         |         |         |         |        |         |        |
|--------------------------|---------|---------|---------|--------|----------|----------|---------|--------|---------|---------|---------|---------|---------|--------|---------|--------|
|                          | 12.54)  | 15.76)  | 0.95)   |        | 86.75)   | 112.84)  | 1.13)   |        | 16.03)  | 11.84)  | -0.35)  | 0.66)   | 0.57)   | -0.35) |         |        |
|                          | 0.64    | 0.88    | 1.11    |        | 1.18     | 1.23     | 0.01    |        | 7.66    | 5.78    | -1.22   | 0.13    | 0.10    | -1.03  |         |        |
| Nicaragua                | (0.28,  | (0.56,  | (1.05,  | <0.001 | (0.62,   | (0.83,   | (-0.08, | 0.782  | (6.22,  | (4.92,  | (-1.79, | <0.001  | (0.01,  | (0.02, | (-1.41, | <0.001 |
|                          | 1.30)   | 1.31)   | 1.17)   |        | 2.06)    | 1.74)    | 0.10)   |        | 9.36)   | 6.75)   | -0.64)  | 0.57)   | 0.30)   | -0.64) |         |        |
|                          | 0.69    | 0.69    | -0.05   |        | 1.27     | 1.28     | 0.02    |        | 12.53   | 12.73   | 0.05    | 0.20    | 0.21    | 0.24   |         |        |
| Niger                    | (0.40,  | (0.50,  | (-0.17, | 0.379  | (0.82,   | (1.00,   | (-0.45, | 0.941  | (11.22, | (11.94, | (-0.22, | 0.728   | (0.07,  | (0.12, | (-0.02, | 0.074  |
|                          | 1.13)   | 0.93)   | 0.07)   |        | 1.89)    | 1.62)    | 0.49)   |        | 13.96)  | 13.57)  | 0.31)   | 0.49)   | 0.35)   | 0.51)  |         |        |
|                          | 0.79    | 0.85    | 0.20    |        | 2.49     | 3.63     | 1.29    |        | 13.11   | 10.52   | -0.75   | 0.21    | 0.17    | -0.82  |         |        |
| Nigeria                  | (0.70,  | (0.78,  | (0.07,  | 0.003  | (2.30,   | (3.48,   | (1.02,  | <0.001 | (12.72, | (10.29, | (-1.06, | <0.001  | (0.17,  | (0.14, | (-1.17, | <0.001 |
|                          | 0.90)   | 0.92)   | 0.33)   |        | 2.69)    | 3.78)    | 1.56)   |        | 13.51)  | 10.74)  | -0.43)  | 0.27)   | 0.20)   | -0.46) |         |        |
|                          | 2.28    | 2.51    | 0.32    |        | 15.03    | 16.87    | 0.37    |        | 27.73   | 22.06   | -0.80   | 0.45    | 0.35    | -0.92  |         |        |
| Niue                     | (0.00,  | (0.00,  | (0.27,  | <0.001 | (0.00,   | (0.00,   | (0.15,  | 0.001  | (0.00,  | (0.00,  | (-0.90, | <0.001  | (0.00,  | (0.00, | (-1.22, | <0.001 |
|                          | 522.39) | 737.10) | 0.37)   |        | 548.67)  | 765.28)  | 0.59)   |        | 569.91) | 774.36) | -0.70)  | 518.62) | 732.80) | -0.63) |         |        |
|                          | 12.84   | 18.09   | 1.20    |        | 99.04    | 142.42   | 1.27    |        | 7.15    | 5.69    | -0.80   | 0.12    | 0.09    | -1.02  |         |        |
| North Macedonia          | (10.50, | (15.33, | (1.16,  | <0.001 | (92.37,  | (134.68, | (1.18,  | <0.001 | (5.44,  | (4.15,  | (-1.13, | <0.001  | (0.00,  | (0.00, | (-1.44, | <0.001 |
|                          | 15.54)  | 21.28)  | 1.24)   |        | 106.08)  | 150.55)  | 1.35)   |        | 9.24)   | 7.69)   | -0.46)  | 0.69)   | 0.81)   | -0.61) |         |        |
|                          | 3.20    | 3.18    | -0.03   |        | 21.34    | 20.37    | -0.25   |        | 42.41   | 48.34   | 0.63    | 0.69    | 0.79    | 0.65   |         |        |
| Northern Mariana Islands | (0.03,  | (0.00,  | (-0.17, | 0.631  | (7.25,   | (2.36,   | (-0.59, | 0.143  | (20.23, | (17.61, | (-0.31, | 0.191   | (0.00,  | (0.00, | (-0.24, | 0.155  |
|                          | 25.22)  | 49.03)  | 0.10)   |        | 51.45)   | 78.02)   | 0.09)   |        | 80.23)  | 113.12) | 1.59)   | 21.14)  | 44.79)  | 1.54)  |         |        |
|                          | 26.23   | 27.72   | 0.21    |        | 208.11   | 219.87   | 0.21    |        | 6.73    | 3.45    | -2.26   | 0.11    | 0.06    | -2.34  |         |        |
| Norway                   | (23.81, | (25.38, | (0.12,  | <0.001 | (201.25, | (213.28, | (0.13,  | <0.001 | (5.54,  | (2.66,  | (-2.68, | <0.001  | (0.01,  | (0.00, | (-3.03, | <0.001 |
|                          | 28.83)  | 30.24)  | 0.30)   |        | 215.17)  | 226.63)  | 0.29)   |        | 8.12)   | 4.42)   | -1.84)  | 0.45)   | 0.35)   | -1.66) |         |        |
|                          | 2.31    | 2.48    | 0.26    |        | 15.70    | 15.61    | -0.00   |        | 20.39   | 15.31   | -0.86   | 0.34    | 0.26    | -0.80  |         |        |
| Oman                     | (1.39,  | (1.93,  | (0.12,  | <0.001 | (13.12,  | (14.27,  | (-0.26, | 0.982  | (17.39, | (13.80, | (-1.12, | <0.001  | (0.06,  | (0.10, | (-1.11, | <0.001 |
|                          | 3.63)   | 3.21)   | 0.39)   |        | 18.67)   | 17.10)   | 0.25)   |        | 23.78)  | 16.99)  | -0.60)  | 1.07)   | 0.65)   | -0.49) |         |        |
|                          | 0.58    | 0.64    | 0.33    |        |          | 0.99     |         |        | 8.54    | 12.18   | 1.24    | 0.15    | 0.20    | 1.16   |         |        |
| Pakistan                 | (0.50,  | (0.59,  | (0.14,  | 0.001  | —        | (0.92,   | —       | —      | (8.24,  | (11.95, | (1.13,  | <0.001  | (0.11,  | (0.18, | (0.93,  | <0.001 |
|                          | 0.66)   | 0.70)   | 0.52)   |        |          | 1.06)    |         |        | 8.84)   | 12.41)  | 1.34)   | 0.19)   | 0.24)   | 1.40)  |         |        |
|                          | 2.25    | 2.39    | 0.20    |        | 15.93    | 15.65    | -0.10   |        | 7.45    | 7.80    | 0.18    | 0.12    | 0.13    | 0.22   |         |        |
| Palau                    | (0.00,  | (0.00,  | (0.12,  | <0.001 | (0.46,   | (0.49,   | (-0.26, | 0.252  | (0.01,  | (0.00,  | (0.07,  | 0.002   | (0.00,  | (0.00, | (-0.17, | 0.262  |
|                          | 63.29)  | 73.19)  | 0.28)   |        | 88.10)   | 94.82)   | 0.07)   |        | 72.65)  | 83.34)  | 0.29)   | 59.12)  | 69.08)  | 0.61)  |         |        |
|                          | 1.86    | 2.05    | 0.35    |        | 11.84    | 13.15    | 0.40    |        | 7.27    | 6.45    | -0.44   | 0.12    | 0.11    | -0.36  |         |        |
| Palestine                | (0.94,  | (1.45,  | (0.21,  | <0.001 | (9.10,   | (11.48,  | (0.16,  | 0.001  | (5.36,  | (5.37,  | (-0.83, | 0.024   | (0.00,  | (0.01, | (-0.62, | 0.009  |



|                   |         |         |         |        |          |          |         |        |         |         |         |        |        |        |         |        |
|-------------------|---------|---------|---------|--------|----------|----------|---------|--------|---------|---------|---------|--------|--------|--------|---------|--------|
|                   | 3.38)   | 2.82)   | 0.49)   |        | 15.17)   | 15.00)   | 0.65)   |        | 9.72)   | 7.69)   | -0.06)  | 0.98)  | 0.41)  | -0.09) |         |        |
|                   | 0.85    | 1.10    | 0.87    |        | 3.41     | 3.52     | 0.17    |        | 17.92   | 9.86    | -1.96   | 0.30   | 0.17   | -2.04  |         |        |
| Panama            | (0.36,  | (0.64,  | (0.68,  | <0.001 | (2.27,   | (2.65,   | (-3.26, | 0.926  | (15.33, | (8.37,  | (-2.85, | <0.001 | (0.06, | (0.03, | (-3.06, | <0.001 |
|                   | 1.72)   | 1.75)   | 1.06)   |        | 4.93)    | 4.58)    | 3.71)   |        | 20.84)  | 11.54)  | -1.06)  | 0.95)  | 0.52)  | -1.01) |         |        |
|                   | 1.97    | 2.06    | 0.13    |        | 12.74    | 13.22    | 0.08    |        | 15.73   | 16.77   | 0.20    | 0.26   | 0.27   | 0.15   |         |        |
| Papua New Guinea  | (1.32,  | (1.63,  | (0.01,  | 0.032  | (10.91,  | (12.07,  | (-0.13, | 0.467  | (13.85, | (15.54, | (0.07,  | 0.002  | (0.07, | (0.13, | (-0.01, | 0.067  |
|                   | 2.85)   | 2.57)   | 0.25)   |        | 14.80)   | 14.44)   | 0.29)   |        | 17.80)  | 18.08)  | 0.32)   | 0.69)  | 0.49)  | 0.31)  |         |        |
|                   | 1.22    | 1.59    | 0.90    |        | 5.17     | 6.71     | 0.92    |        | 13.64   | 16.85   | 0.75    | 0.23   | 0.29   | 0.74   |         |        |
| Paraguay          | (0.72,  | (1.17,  | (0.84,  | <0.001 | (4.02,   | (5.78,   | (0.65,  | <0.001 | (11.82, | (15.40, | (0.12,  | 0.019  | (0.05, | (0.13, | (0.35,  | <0.001 |
|                   | 1.95)   | 2.12)   | 0.96)   |        | 6.55)    | 7.73)    | 1.20)   |        | 15.67)  | 18.41)  | 1.39)   | 0.66)  | 0.56)  | 1.14)  |         |        |
|                   | 0.66    | 1.24    | 2.20    |        | 1.22     | 4.27     | 4.55    |        | 9.93    | 5.32    | -2.04   | 0.16   | 0.09   | -1.79  |         |        |
| Peru              | (0.49,  | (1.06,  | (2.04,  | <0.001 | (0.97,   | (3.93,   | (3.69,  | <0.001 | (9.28,  | (4.94,  | (-2.70, | <0.001 | (0.09, | (0.05, | (-3.11, | 0.009  |
|                   | 0.87)   | 1.44)   | 2.37)   |        | 1.51)    | 4.64)    | 5.42)   |        | 10.62)  | 5.72)   | -1.38)  | 0.28)  | 0.15)  | -0.45) |         |        |
|                   | 1.08    | 1.16    | 0.26    |        | 6.40     | 6.87     | 0.25    |        | 1.15    | 3.53    | 4.01    | 0.02   | 0.06   | 3.86   |         |        |
| Philippines       | (0.95,  | (1.06,  | (0.22,  | <0.001 | (6.06,   | (6.62,   | (0.22,  | <0.001 | (1.01,  | (3.36,  | (3.62,  | <0.001 | (0.01, | (0.04, | (2.69,  | <0.001 |
|                   | 1.22)   | 1.27)   | 0.30)   |        | 6.75)    | 7.13)    | 0.28)   |        | 1.29)   | 3.71)   | 4.39)   | 0.05)  | 0.09)  | 5.06)  |         |        |
|                   | 15.94   | 20.04   | 0.79    |        | 124.46   | 158.31   | 0.83    |        | 4.37    | 8.43    | 2.20    | 0.07   | 0.14   | 2.49   |         |        |
| Poland            | (15.31, | (19.30, | (0.68,  | <0.001 | (122.75, | (156.33, | (0.72,  | <0.001 | (4.04,  | (7.95,  | (1.61,  | <0.001 | (0.04, | (0.09, | (1.60,  | <0.001 |
|                   | 16.58)  | 20.80)  | 0.90)   |        | 126.19)  | 160.32)  | 0.95)   |        | 4.72)   | 8.95)   | 2.79)   | 0.13)  | 0.23)  | 3.38)  |         |        |
|                   | 0.21    | 0.62    | 3.77    |        |          |          |         |        | 15.25   | 11.75   | -0.80   | 0.26   | 0.20   | -0.78  |         |        |
| Portugal          | (0.09,  | (0.38,  | (3.47,  | <0.001 | —        | —        | —       | —      | (14.03, | (10.59, | (-1.59, | 0.048  | (0.12, | (0.08, | (-1.56, | 0.051  |
|                   | 0.41)   | 0.97)   | 4.08)   |        |          |          |         |        | 16.55)  | 13.02)  | -0.01)  | 0.48)  | 0.44)  | 0.00)  |         |        |
|                   | 2.75    | 6.96    | 3.28    |        | 15.78    | 49.29    | 4.07    |        | 16.75   | 11.81   | -1.16   | 0.29   | 0.20   | -1.50  |         |        |
| Puerto Rico       | (1.95,  | (5.52,  | (3.18,  | <0.001 | (13.73,  | (45.36,  | (3.74,  | <0.001 | (14.67, | (9.90,  | (-2.38, | 0.065  | (0.08, | (0.03, | (-2.66, | 0.012  |
|                   | 3.78)   | 8.67)   | 3.39)   |        | 18.04)   | 53.49)   | 4.40)   |        | 19.06)  | 13.98)  | 0.07)   | 0.74)  | 0.69)  | -0.33) |         |        |
|                   | 6.87    | 6.43    | -0.18   |        | 48.09    | 46.61    | -0.07   |        | 10.76   | 5.73    | -2.18   | 0.18   | 0.10   | -2.01  |         |        |
| Qatar             | (4.07,  | (5.32,  | (-0.42, | 0.135  | (40.48,  | (43.79,  | (-0.38, | 0.669  | (6.90,  | (4.55,  | (-2.52, | <0.001 | (0.00, | (0.01, | (-2.32, | <0.001 |
|                   | 11.54)  | 7.92)   | 0.06)   |        | 57.28)   | 49.75)   | 0.24)   |        | 16.53)  | 7.33)   | -1.84)  | 3.12)  | 0.86)  | -1.70) |         |        |
|                   | 21.54   | 30.52   | 1.22    |        | 170.36   | 242.62   | 1.24    |        | 5.32    | 2.97    | -1.98   | 0.09   | 0.05   | -2.10  |         |        |
| Republic of Korea | (20.91, | (29.73, | (1.14,  | <0.001 | (168.56, | (240.47, | (1.17,  | <0.001 | (5.01,  | (2.72,  | (-2.22, | <0.001 | (0.05, | (0.02, | (-2.59, | <0.001 |
|                   | 22.19)  | 31.32)  | 1.30)   |        | 172.18)  | 244.80)  | 1.30)   |        | 5.64)   | 3.23)   | -1.73)  | 0.14)  | 0.10)  | -1.61) |         |        |
| Republic of       | 15.19   | 18.79   | 0.74    |        | 118.73   | 147.71   | 0.75    |        | 3.76    | 3.44    | -0.48   | 0.06   | 0.06   | -0.56  |         |        |
| Moldova           | (13.46, | (16.62, | (0.70,  | <0.001 | (113.89, | (141.77, | (0.58,  | <0.001 | (2.91,  | (2.52,  | (-1.35, | 0.291  | (0.00, | (0.00, | (-1.58, | 0.288  |

|                                  |         |         |         |        |          |          |         |        |         |         |         |        |        |        |         |        |
|----------------------------------|---------|---------|---------|--------|----------|----------|---------|--------|---------|---------|---------|--------|--------|--------|---------|--------|
|                                  | 17.10)  | 21.22)  | 0.78)   |        | 123.75)  | 153.88)  | 0.92)   |        | 4.81)   | 4.63)   | 0.41)   |        | 0.36)  | 0.50)  | 0.47)   |        |
|                                  | 13.81)  | 28.36)  | 2.52)   |        | 107.80)  | 224.57)  | 2.57)   |        | 10.11)  | 8.19)   | -0.57)  |        | 0.17)  | 0.13)  | -0.81)  |        |
| Romania                          | (13.04, | (27.03, | (2.48,  | <0.001 | (105.64, | (220.91, | (2.49,  | <0.001 | (9.45,  | (7.47,  | (-1.33, | 0.138  | (0.09, | (0.06, | (-1.25, | <0.001 |
|                                  | 14.62)  | 29.74)  | 2.56)   |        | 109.99)  | 228.28)  | 2.66)   |        | 10.80)  | 8.97)   | 0.18)   |        | 0.29)  | 0.27)  | -0.35)  |        |
|                                  | 17.54)  | 25.10)  | 1.24)   |        | 137.98)  | 198.25)  | 1.26)   |        | 4.71)   | 9.38)   | 2.56)   |        | 0.08)  | 0.16)  | 2.50)   |        |
| Russian Federation               | (17.21, | (24.67, | (1.22,  | <0.001 | (137.08, | (197.11, | (1.23,  | <0.001 | (4.54,  | (9.10,  | (1.31,  | <0.001 | (0.05, | (0.12, | (1.41,  | <0.001 |
|                                  | 17.87)  | 25.53)  | 1.27)   |        | 138.88)  | 199.40)  | 1.30)   |        | 4.90)   | 9.65)   | 3.81)   |        | 0.10)  | 0.20)  | 3.60)   |        |
|                                  | 0.76)   | 0.58)   | -0.95)  |        | 2.33)    | 0.91)    |         |        | 27.20)  | 12.68)  | -2.61)  |        | 0.45)  | 0.21)  | -2.66)  |        |
| Rwanda                           | (0.45,  | (0.39,  | (-1.26, | <0.001 | (1.72,   | (0.65,   | —       | —      | (25.22, | (11.73, | (-2.79, | <0.001 | (0.23, | (0.11, | (-3.09, | <0.001 |
|                                  | 1.20)   | 0.84)   | -0.64)  |        | 3.08)    | 1.23)    |         |        | 29.31)  | 13.69)  | -2.43)  |        | 0.82)  | 0.39)  | -2.23)  |        |
|                                  | 1.51)   | 1.99)   | 0.89)   |        | 7.61)    | 10.74)   | 1.15)   |        | 25.07)  | 11.43)  | -2.50)  |        | 0.43)  | 0.19)  | -2.63)  |        |
| Saint Kitts and Nevis            | (0.00,  | (0.00,  | (0.72,  | <0.001 | (0.30,   | (1.95,   | (0.63,  | <0.001 | (6.98,  | (1.99,  | (-3.56, | <0.001 | (0.00, | (0.00, | (-3.72, | <0.001 |
|                                  | 28.54)  | 21.80)  | 1.06)   |        | 39.49)   | 35.40)   | 1.67)   |        | 65.27)  | 37.17)  | -1.42)  |        | 26.53) | 18.58) | -1.52)  |        |
|                                  | 1.25)   | 1.61)   | 0.86)   |        | 6.08)    | 8.44)    | 1.07)   |        | 14.89)  | 11.61)  | -0.88)  |        | 0.25)  | 0.20)  | -0.69)  |        |
| Saint Lucia                      | (0.00,  | (0.06,  | (0.77,  | <0.001 | (1.04,   | (3.08,   | (0.51,  | <0.001 | (6.15,  | (4.99,  | (-1.35, | <0.001 | (0.00, | (0.00, | (-1.32, | 0.032  |
|                                  | 11.54)  | 8.84)   | 0.95)   |        | 19.61)   | 18.81)   | 1.63)   |        | 31.14)  | 23.23)  | -0.40)  |        | 9.83)  | 6.38)  | -0.06)  |        |
|                                  | 1.36)   | 1.73)   | 0.78)   |        | 6.59)    | 8.24)    | 0.66)   |        | 34.89)  | 21.50)  | -1.61)  |        | 0.59)  | 0.36)  | -1.64)  |        |
| Saint Vincent and the Grenadines | (0.00,  | (0.01,  | (0.62,  | <0.001 | (0.95,   | (1.99,   | (-0.00, | 0.051  | (19.16, | (9.84,  | (-2.58, | 0.001  | (0.00, | (0.00, | (-2.65, | 0.002  |
|                                  | 14.16)  | 12.45)  | 0.94)   |        | 22.97)   | 22.70)   | 1.33)   |        | 59.56)  | 40.98)  | -0.63)  |        | 12.84) | 9.91)  | -0.62)  |        |
|                                  | 2.27)   | 2.35)   | 0.11)   |        | 14.57)   | 14.96)   | 0.06)   |        | 22.01)  | 21.52)  | -0.08)  |        | 0.36)  | 0.35)  | -0.12)  |        |
| Samoa                            | (0.10,  | (0.22,  | (-0.03, | 0.110  | (5.84,   | (7.26,   | (-0.07, | 0.370  | (11.92, | (12.59, | (-0.16, | 0.035  | (0.00, | (0.00, | (-0.36, | 0.339  |
|                                  | 12.30)  | 9.70)   | 0.24)   |        | 30.47)   | 27.44)   | 0.20)   |        | 38.33)  | 34.80)  | -0.01)  |        | 9.06)  | 6.30)  | 0.13)   |        |
|                                  | 0.64)   | 2.16)   | 4.26)   |        | 2.11)    | 13.31)   | 6.35)   |        | 3.65)   | 6.51)   | 2.01)   |        | 0.06)  | 0.11)  | 2.12)   |        |
| San Marino                       | (0.00,  | (0.00,  | (4.08,  | <0.001 | (0.00,   | (0.92,   | (5.06,  | <0.001 | (0.00,  | (0.04,  | (1.82,  | <0.001 | (0.00, | (0.00, | (1.55,  | <0.001 |
|                                  | 45.07)  | 43.37)  | 4.44)   |        | 48.10)   | 61.90)   | 7.66)   |        | 50.86)  | 51.16)  | 2.20)   |        | 43.91) | 39.54) | 2.69)   |        |
|                                  | 0.85)   | 0.96)   | 0.36)   |        | 3.67)    | 4.04)    | 0.21)   |        | 9.87)   | 14.18)  | 1.26)   |        | 0.17)  | 0.23)  | 1.19)   |        |
| Sao Tome and Principe            | (0.00,  | (0.01,  | (0.26,  | <0.001 | (0.10,   | (0.85,   | (0.03,  | 0.023  | (2.47,  | (7.39,  | (0.29,  | 0.011  | (0.00, | (0.00, | (0.09,  | 0.034  |
|                                  | 15.19)  | 6.71)   | 0.45)   |        | 20.45)   | 11.74)   | 0.39)   |        | 28.63)  | 24.91)  | 2.24)   |        | 13.99) | 5.37)  | 2.29)   |        |
|                                  | 2.59)   | 3.60)   | 1.12)   |        | 17.98)   | 24.13)   | 0.96)   |        | 15.95)  | 15.65)  | -0.09)  |        | 0.27)  | 0.27)  | 0.02)   |        |
| Saudi Arabia                     | (2.20,  | (3.35,  | (1.00,  | <0.001 | (16.91,  | (23.49,  | (0.63,  | <0.001 | (14.98, | (15.09, | (-0.29, | 0.395  | (0.16, | (0.20, | (-0.39, | 0.916  |
|                                  | 3.03)   | 3.88)   | 1.25)   |        | 19.11)   | 24.78)   | 1.30)   |        | 16.97)  | 16.23)  | 0.11)   |        | 0.44)  | 0.35)  | 0.44)   |        |
|                                  | 0.77)   | 0.83)   | 0.25)   |        | 3.42)    | 3.62)    | 0.22)   |        | 11.10)  | 12.06)  | 0.25)   |        | 0.18)  | 0.20)  | 0.28)   |        |
| Senegal                          | (0.45,  | (0.60,  | (0.14,  | <0.001 | (2.66,   | (3.10,   | (-0.00, | 0.054  | (9.87,  | (11.20, | (-0.73, | 0.621  | (0.06, | (0.10, | (-0.78, | 0.602  |

|                 |         |         |         |        |          |          |         |        |         |         |         |        |        |        |         |        |
|-----------------|---------|---------|---------|--------|----------|----------|---------|--------|---------|---------|---------|--------|--------|--------|---------|--------|
|                 | 1.23)   | 1.11)   | 0.37)   |        | 4.33)    | 4.20)    | 0.45)   |        | 12.46)  | 12.98)  | 1.24)   |        | 0.46)  | 0.35)  | 1.36)   |        |
|                 | 16.00)  | 21.10)  | 0.99)   |        | 124.58)  | 167.09)  | 1.05)   |        | 14.98)  | 12.07)  | -0.75)  |        | 0.26)  | 0.21)  | -0.70)  |        |
| Serbia          | (14.71, | (19.48, | (0.93,  | <0.001 | (121.01, | (162.58, | (0.94,  | <0.001 | (13.74, | (10.86, | (-1.01, | <0.001 | (0.12, | (0.08, | (-1.11, | 0.001  |
|                 | 17.37)  | 22.82)  | 1.05)   |        | 128.25)  | 171.70)  | 1.15)   |        | 16.32)  | 13.39)  | -0.49)  |        | 0.49)  | 0.46)  | -0.28)  |        |
|                 | 1.48)   | 1.62)   | 0.30)   |        | 9.69)    | 10.41)   | 0.24)   |        | 9.57)   | 9.24)   | -0.12)  |        | 0.16)  | 0.16)  | -0.04)  |        |
| Seychelles      | (0.00,  | (0.01,  | (0.23,  | <0.001 | (1.62,   | (3.16,   | (0.16,  | <0.001 | (1.78,  | (2.33,  | (-0.50, | 0.543  | (0.00, | (0.00, | (-0.61, | 0.903  |
|                 | 18.75)  | 14.36)  | 0.37)   |        | 32.19)   | 27.10)   | 0.33)   |        | 31.35)  | 25.98)  | 0.27)   |        | 16.46) | 11.91) | 0.55)   |        |
|                 | 0.73)   | 0.79)   | 0.17)   |        | 1.36)    | 3.42)    | 3.09)   |        | 11.62)  | 15.81)  | 1.08)   |        | 0.19)  | 0.26)  | 1.04)   |        |
| Sierra Leone    | (0.33,  | (0.51,  | (-0.08, | 0.184  | (0.76,   | (2.76,   | (0.77,  | 0.009  | (9.87,  | (14.50, | (0.79,  | <0.001 | (0.03, | (0.11, | (0.74,  | <0.001 |
|                 | 1.40)   | 1.19)   | 0.42)   |        | 2.25)    | 4.20)    | 5.46)   |        | 13.62)  | 17.21)  | 1.37)   |        | 0.65)  | 0.51)  | 1.33)   |        |
|                 | 26.34)  | 36.93)  | 1.17)   |        | 210.16)  | 296.57)  | 1.20)   |        | 12.08)  | 4.86)   | -3.14)  |        | 0.20)  | 0.08)  | -3.27)  |        |
| Singapore       | (23.85, | (34.50, | (1.11,  | <0.001 | (203.02, | (290.11, | (1.13,  | <0.001 | (10.40, | (3.95,  | (-3.91, | <0.001 | (0.04, | (0.01, | (-4.71, | <0.001 |
|                 | 29.04)  | 39.53)  | 1.23)   |        | 217.50)  | 303.19)  | 1.27)   |        | 13.98)  | 5.97)   | -2.36)  |        | 0.62)  | 0.43)  | -1.81)  |        |
|                 | 9.53)   | 16.75)  | 1.96)   |        | 72.87)   | 131.61)  | 2.06)   |        | 9.62)   | 12.46)  | 0.83)   |        | 0.16)  | 0.21)  | 0.81)   |        |
| Slovakia        | (8.26,  | (14.99, | (1.92,  | <0.001 | (69.35,  | (126.81, | (1.93,  | <0.001 | (8.34,  | (10.91, | (0.55,  | <0.001 | (0.04, | (0.06, | (0.42,  | <0.001 |
|                 | 10.95)  | 18.70)  | 2.01)   |        | 76.53)   | 136.59)  | 2.19)   |        | 11.04)  | 14.19)  | 1.12)   |        | 0.47)  | 0.61)  | 1.21)   |        |
|                 | 15.16)  | 25.46)  | 1.81)   |        | 118.10)  | 201.68)  | 1.87)   |        | 8.36)   | 7.09)   | -0.53)  |        | 0.15)  | 0.12)  | -0.79)  |        |
| Slovenia        | (12.60, | (21.73, | (1.73,  | <0.001 | (110.87, | (191.39, | (1.78,  | <0.001 | (6.49,  | (5.21,  | (-1.00, | 0.027  | (0.01, | (0.00, | (-1.47, | 0.026  |
|                 | 18.13)  | 29.75)  | 1.89)   |        | 125.73)  | 212.49)  | 1.96)   |        | 10.63)  | 9.55)   | -0.06)  |        | 0.81)  | 1.06)  | -0.10)  |        |
|                 | 1.80)   | 1.78)   | -0.04)  |        | 11.49)   | 11.22)   | -0.13)  |        | 24.01)  | 23.97)  | -0.00)  |        | 0.40)  | 0.40)  | 0.03)   |        |
| Solomon Islands | (0.20,  | (0.52,  | (-0.15, | 0.424  | (5.68,   | (7.33,   | (-0.28, | 0.080  | (15.96, | (18.34, | (-0.12, | 0.964  | (0.00, | (0.01, | (-0.07, | 0.590  |
|                 | 7.25)   | 4.47)   | 0.06)   |        | 20.84)   | 16.45)   | 0.02)   |        | 35.13)  | 30.84)  | 0.11)   |        | 4.94)  | 2.34)  | 0.13)   |        |
|                 | 0.51)   | 0.40)   | -0.89)  |        |          |          |         |        | 19.28)  | 11.97)  | -1.63)  |        | 0.32)  | 0.20)  | -1.68)  |        |
| Somalia         | (0.26,  | (0.26,  | (-1.02, | <0.001 | —        | —        | —       | —      | (17.55, | (11.18, | (-1.78, | <0.001 | (0.14, | (0.11, | (-1.97, | <0.001 |
|                 | 0.91)   | 0.59)   | -0.77)  |        |          |          |         |        | 21.13)  | 12.80)  | -1.47)  |        | 0.66)  | 0.34)  | -1.40)  |        |
|                 | 1.39)   | 3.31)   | 3.03)   |        | 6.35)    | 19.62)   | 3.99)   |        | 34.41)  | 14.33)  | -2.89)  |        | 0.59)  | 0.24)  | -3.17)  |        |
| South Africa    | (1.21,  | (3.08,  | (2.89,  | <0.001 | (5.92,   | (19.08,  | (3.71,  | <0.001 | (33.47, | (13.86, | (-4.01, | <0.001 | (0.47, | (0.19, | (-4.02, | <0.001 |
|                 | 1.60)   | 3.54)   | 3.16)   |        | 6.80)    | 20.17)   | 4.28)   |        | 35.37)  | 14.81)  | -1.76)  |        | 0.73)  | 0.31)  | -2.31)  |        |
|                 | 0.97)   | 0.85)   | -0.49)  |        | 5.27)    | 2.81)    | -2.52)  |        | 15.07)  | 9.01)   | -1.76)  |        | 0.25)  | 0.15)  | -1.81)  |        |
| South Sudan     | (0.58,  | (0.54,  | (-0.62, | <0.001 | (4.22,   | (2.21,   | (-3.63, | <0.001 | (13.43, | (7.98,  | (-2.09, | <0.001 | (0.08, | (0.05, | (-2.16, | <0.001 |
|                 | 1.54)   | 1.27)   | -0.36)  |        | 6.52)    | 3.51)    | -1.39)  |        | 16.87)  | 10.15)  | -1.44)  |        | 0.62)  | 0.38)  | -1.46)  |        |
|                 | 0.67)   | 1.17)   | 1.91)   |        | 2.10)    | 4.37)    | 2.30)   |        | 19.93)  | 8.64)   | -3.03)  |        | 0.33)  | 0.15)  | -2.90)  |        |
| Spain           | (0.54,  | (1.00,  | (1.72,  | <0.001 | (1.86,   | (4.08,   | (1.35,  | <0.001 | (19.22, | (8.15,  | (-3.61, | <0.001 | (0.25, | (0.09, | (-3.52, | <0.001 |

|                               |        |         |         |        |         |         |         |        |         |         |         |        |        |        |         |        |
|-------------------------------|--------|---------|---------|--------|---------|---------|---------|--------|---------|---------|---------|--------|--------|--------|---------|--------|
|                               | 0.82)  | 1.37)   | 2.11)   |        | 2.35)   | 4.69)   | 3.27)   |        | 20.67)  | 9.16)   | -2.45)  |        | 0.44)  | 0.23)  | -2.28)  |        |
|                               | 1.17   | 1.37    | 0.54    |        | 6.92    | 8.17    | 0.56    |        | 11.66   | 6.25    | -2.07   |        | 0.20   | 0.11   | -2.03   |        |
| Sri Lanka                     | (0.93, | (1.13,  | (0.48,  | <0.001 | (6.31,  | (7.57,  | (0.45,  | <0.001 | (10.88, | (5.72,  | (-2.73, | <0.001 | (0.11, | (0.05, | (-2.88, | <0.001 |
|                               | 1.45)  | 1.65)   | 0.61)   |        | 7.57)   | 8.80)   | 0.68)   |        | 12.47)  | 6.82)   | -1.41)  |        | 0.33)  | 0.20)  | -1.18)  |        |
|                               | 1.48   | 1.64    | 0.38    |        | 9.49    | 10.58   | 0.43    |        | 25.43   | 20.59   | -0.72   |        | 0.42   | 0.34   | -0.71   |        |
| Sudan                         | (1.20, | (1.45,  | (0.30,  | <0.001 | (8.73,  | (10.05, | (0.32,  | <0.001 | (24.27, | (19.90, | (-0.79, | <0.001 | (0.28, | (0.26, | (-0.97, | <0.001 |
|                               | 1.81)  | 1.86)   | 0.47)   |        | 10.31)  | 11.12)  | 0.55)   |        | 26.64)  | 21.29)  | -0.65)  |        | 0.61)  | 0.45)  | -0.45)  |        |
|                               | 1.58   | 1.98    | 0.72    |        | 8.17    | 9.82    | 0.33    |        | 27.11   | 24.85   | -0.32   |        | 0.45   | 0.42   | -0.31   |        |
| Suriname                      | (0.22, | (0.57,  | (0.58,  | <0.001 | (3.92,  | (6.11,  | (-0.44, | 0.406  | (19.38, | (18.64, | (-1.79, | 0.673  | (0.00, | (0.01, | (-1.07, | 0.431  |
|                               | 5.80)  | 4.98)   | 0.87)   |        | 15.13)  | 14.98)  | 1.10)   |        | 37.18)  | 32.50)  | 1.17)   |        | 4.02)  | 2.56)  | 0.46)   |        |
|                               | 1.87   | 4.45    | 2.98    |        | 11.73   | 32.27   | 3.64    |        | 7.98    | 4.90    | -1.66   |        | 0.14   | 0.08   | -1.64   |        |
| Sweden                        | (1.41, | (3.77,  | (2.71,  | <0.001 | (10.56, | (30.44, | (3.30,  | <0.001 | (7.00,  | (4.18,  | (-2.00, | <0.001 | (0.04, | (0.02, | (-1.95, | <0.001 |
|                               | 2.43)  | 5.23)   | 3.25)   |        | 13.00)  | 34.20)  | 3.99)   |        | 9.07)   | 5.72)   | -1.33)  |        | 0.36)  | 0.27)  | -1.33)  |        |
|                               | 1.47   | 3.40    | 2.98    |        | 8.32    | 23.39   | 3.50    |        | 7.91    | 4.10    | -2.29   |        | 0.14   | 0.07   | -2.33   |        |
| Switzerland                   | (1.06, | (2.77,  | (2.75,  | <0.001 | (7.30,  | (21.78, | (2.77,  | <0.001 | (6.89,  | (3.41,  | (-2.78, | <0.001 | (0.04, | (0.01, | (-3.32, | <0.001 |
|                               | 2.02)  | 4.14)   | 3.21)   |        | 9.46)   | 25.12)  | 4.24)   |        | 9.05)   | 4.92)   | -1.79)  |        | 0.39)  | 0.29)  | -1.34)  |        |
|                               | 2.27   | 2.06    | -0.34   |        | 13.83   | 13.19   | -0.25   |        | 84.42   | 35.37   | -2.89   |        | 1.39   | 0.58   | -2.89   |        |
| Syrian Arab<br>Republic       | (1.82, | (1.66,  | (-0.52, | <0.001 | (12.62, | (12.13, | (-0.64, | 0.222  | (81.73, | (33.70, | (-3.42, | <0.001 | (1.06, | (0.38, | (-3.42, | <0.001 |
|                               | 2.80)  | 2.55)   | -0.16)  |        | 15.12)  | 14.34)  | 0.15)   |        | 87.18)  | 37.13)  | -2.37)  |        | 1.80)  | 0.86)  | -2.36)  |        |
|                               | 4.26   | 11.95   | 3.48    |        | 32.58   | 91.60   | 3.66    |        | 11.06   | 7.44    | -1.35   |        | 0.18   | 0.12   | -1.48   |        |
| Taiwan (Province<br>of China) | (3.85, | (11.23, | (3.22,  | <0.001 | (31.45, | (89.66, | (3.41,  | <0.001 | (10.39, | (6.86,  | (-2.33, | 0.007  | (0.11, | (0.06, | (-2.67, | 0.016  |
|                               | 4.70)  | 12.71)  | 3.74)   |        | 33.75)  | 93.58)  | 3.91)   |        | 11.75)  | 8.06)   | -0.36)  |        | 0.30)  | 0.24)  | -0.28)  |        |
|                               | 9.14   | 8.70    | -0.17   |        | 72.19   | 67.24   | -0.23   |        | 4.54    | 4.76    | 0.22    |        | 0.07   | 0.08   | 0.34    |        |
| Tajikistan                    | (7.81, | (7.80,  | (-0.21, | <0.001 | (68.21, | (64.66, | (-0.33, | <0.001 | (3.65,  | (4.11,  | (-0.06, | 0.129  | (0.00, | (0.02, | (-0.66, | 0.508  |
|                               | 10.66) | 9.67)   | -0.14)  |        | 76.34)  | 69.90)  | -0.13)  |        | 5.62)   | 5.49)   | 0.50)   |        | 0.37)  | 0.23)  | 1.35)   |        |
|                               | 1.19   | 1.46    | 0.71    |        | 7.10    | 8.65    | 0.68    |        | 3.05    | 5.55    | 2.18    |        | 0.05   | 0.09   | 2.23    |        |
| Thailand                      | (1.06, | (1.31,  | (0.62,  | <0.001 | (6.76,  | (8.31,  | (0.52,  | <0.001 | (2.83,  | (5.26,  | (1.56,  | <0.001 | (0.03, | (0.06, | (1.23,  | <0.001 |
|                               | 1.34)  | 1.61)   | 0.80)   |        | 7.46)   | 9.00)   | 0.84)   |        | 3.28)   | 5.85)   | 2.81)   |        | 0.09)  | 0.14)  | 3.23)   |        |
|                               | 1.00   | 1.15    | 0.48    |        | 5.91    | 6.85    | 0.49    |        | 2.25    | 3.11    | 1.25    |        | 0.04   | 0.05   | 0.70    |        |
| Timor-Leste                   | (0.20, | (0.37,  | (0.40,  | <0.001 | (3.36,  | (4.44,  | (0.30,  | <0.001 | (0.88,  | (1.72,  | (0.52,  | 0.001  | (0.00, | (0.00, | (-0.46, | 0.237  |
|                               | 3.09)  | 2.81)   | 0.56)   |        | 9.67)   | 10.11)  | 0.67)   |        | 4.84)   | 5.30)   | 1.98)   |        | 1.55)  | 1.15)  | 1.88)   |        |
|                               | 0.74   | 0.78    | 0.15    |        | 2.33    | 3.31    | 1.26    |        | 13.98   | 14.84   | 0.21    |        | 0.23   | 0.24   | 0.16    |        |
| Togo                          | (0.33, | (0.50,  | (0.00,  | 0.046  | (1.46,  | (2.67,  | (0.69,  | <0.001 | (12.03, | (13.53, | (-0.02, | 0.069  | (0.05, | (0.10, | (-0.09, | 0.213  |

|                         |         |         |        |        |          |          |         |        |         |         |         |        |         |         |         |        |
|-------------------------|---------|---------|--------|--------|----------|----------|---------|--------|---------|---------|---------|--------|---------|---------|---------|--------|
|                         | 1.45)   | 1.18)   | 0.30)  |        | 3.52)    | 4.07)    | 1.84)   |        | 16.19)  | 16.25)  | 0.44)   |        | 0.74)   | 0.49)   | 0.40)   |        |
|                         | 2.00)   | 2.22)   | 0.35)  |        | 13.34)   | 13.94)   | 0.14)   |        | 23.18)  | 23.28)  | 0.04)   |        | 0.38)   | 0.38)   | 0.01)   |        |
| Tokelau                 | (0.00,  | (0.00,  | (0.25, | <0.001 | (0.00,   | (0.00,   | (-0.12, | 0.294  | (0.00,  | (0.00,  | (-0.23, | 0.787  | (0.00,  | (0.00,  | (-0.38, | 0.965  |
|                         | 824.61) | 891.58) | 0.45)  |        | 846.35)  | 914.85)  | 0.39)   |        | 862.29) | 930.47) | 0.30)   |        | 821.56) | 887.97) | 0.40)   |        |
|                         | 2.19)   | 2.33)   | 0.21)  |        | 14.37)   | 14.89)   | 0.04)   |        | 16.42)  | 17.02)  | 0.15)   |        | 0.27)   | 0.28)   | 0.14)   |        |
| Tonga                   | (0.01,  | (0.03,  | (0.16, | <0.001 | (3.68,   | (4.78,   | (-0.18, | 0.723  | (5.70,  | (6.54,  | (-0.02, | 0.083  | (0.00,  | (0.00,  | (-0.22, | 0.442  |
|                         | 19.36)  | 15.65)  | 0.26)  |        | 38.73)   | 35.08)   | 0.26)   |        | 39.48)  | 36.90)  | 0.33)   |        | 16.01)  | 11.87)  | 0.51)   |        |
| Trinidad and<br>Tobago  | 1.40)   | 1.98)   | 1.20)  |        | 6.63)    | 10.50)   | 1.53)   |        | 21.47)  | 16.61)  | -0.86)  |        | 0.36)   | 0.28)   | -0.80)  |        |
|                         | (0.55,  | (0.98,  | (1.13, | <0.001 | (4.49,   | (8.12,   | (1.23,  | <0.001 | (17.58, | (13.33, | (-1.54, | 0.015  | (0.04,  | (0.02,  | (-1.53, | 0.031  |
|                         | 2.95)   | 3.66)   | 1.26)  |        | 9.45)    | 13.46)   | 1.82)   |        | 26.00)  | 20.53)  | -0.17)  |        | 1.46)   | 1.36)   | -0.07)  |        |
|                         | 2.00)   | 2.29)   | 0.47)  |        | 12.67)   | 15.27)   | 0.68)   |        | 19.39)  | 16.59)  | -0.54)  |        | 0.32)   | 0.28)   | -0.48)  |        |
| Tunisia                 | (1.53,  | (1.88,  | (0.47, | <0.001 | (11.39,  | (14.21,  | (0.43,  | <0.001 | (17.90, | (15.42, | (-0.64, | <0.001 | (0.16,  | (0.15,  | (-0.78, | 0.001  |
|                         | 2.58)   | 2.77)   | 0.48)  |        | 14.06)   | 16.39)   | 0.92)   |        | 20.99)  | 17.82)  | -0.43)  |        | 0.61)   | 0.49)   | -0.19)  |        |
|                         | 2.94)   | 3.12)   | 0.26)  |        | 20.19)   | 20.41)   | 0.04)   |        | 33.00)  | 13.30)  | -3.07)  |        | 0.56)   | 0.23)   | -3.08)  |        |
| Turkey                  | (2.72,  | (2.94,  | (0.00, | 0.047  | (19.59,  | (19.95,  | (-0.25, | 0.786  | (32.26, | (12.92, | (-3.50, | <0.001 | (0.47,  | (0.18,  | (-3.57, | <0.001 |
|                         | 3.17)   | 3.31)   | 0.52)  |        | 20.80)   | 20.88)   | 0.33)   |        | 33.75)  | 13.69)  | -2.65)  |        | 0.67)   | 0.28)   | -2.60)  |        |
|                         | 9.79)   | 12.23)  | 0.76)  |        | 77.01)   | 94.64)   | 0.69)   |        | 3.71)   | 5.14)   | 1.24)   |        | 0.06)   | 0.08)   | 1.27)   |        |
| Turkmenistan            | (8.22,  | (10.77, | (0.71, | <0.001 | (72.34,  | (90.51,  | (0.64,  | <0.001 | (2.80,  | (4.20,  | (0.35,  | 0.006  | (0.00,  | (0.01,  | (-0.06, | 0.062  |
|                         | 11.60)  | 13.83)  | 0.81)  |        | 81.90)   | 98.92)   | 0.74)   |        | 4.84)   | 6.24)   | 2.15)   |        | 0.42)   | 0.34)   | 2.63)   |        |
|                         | 1.83)   | 1.89)   | 0.11)  |        | 12.16)   | 11.91)   | -0.08)  |        | 28.11)  | 26.66)  | -0.19)  |        | 0.46)   | 0.44)   | -0.19)  |        |
| Tuvalu                  | (0.00,  | (0.00,  | (0.02, | 0.014  | (0.00,   | (0.01,   | (-0.15, | 0.013  | (0.74,  | (1.30,  | (-0.24, | <0.001 | (0.00,  | (0.00,  | (-0.38, | 0.063  |
|                         | 112.25) | 93.32)  | 0.20)  |        | 132.40)  | 112.48)  | -0.02)  |        | 159.95) | 135.81) | -0.14)  |        | 109.49) | 90.47)  | 0.01)   |        |
|                         | 0.51)   | 0.56)   | 0.29)  |        |          | 0.87)    |         |        | 12.60)  | 12.21)  | -0.17)  |        | 0.21)   | 0.20)   | -0.14)  |        |
| Uganda                  | (0.33,  | (0.44,  | (0.23, | <0.001 | —        | (0.70,   | —       | —      | (11.69, | (11.64, | (-0.54, | 0.374  | (0.11,  | (0.14,  | (-0.73, | 0.644  |
|                         | 0.75)   | 0.71)   | 0.35)  |        |          | 1.06)    |         |        | 13.58)  | 12.80)  | 0.20)   |        | 0.38)   | 0.30)   | 0.45)   |        |
|                         | 16.17)  | 19.65)  | 0.67)  |        | 127.46)  | 154.33)  | 0.66)   |        | 1.99)   | 6.68)   | 3.90)   |        | 0.03)   | 0.11)   | 4.14)   |        |
| Ukraine                 | (15.62, | (18.96, | (0.56, | <0.001 | (125.92, | (152.50, | (0.48,  | <0.001 | (1.80,  | (6.27,  | (2.17,  | <0.001 | (0.01,  | (0.06,  | (1.83,  | <0.001 |
|                         | 16.74)  | 20.35)  | 0.78)  |        | 129.00)  | 156.18)  | 0.84)   |        | 2.20)   | 7.13)   | 5.67)   |        | 0.07)   | 0.18)   | 6.50)   |        |
|                         | 3.35)   | 4.66)   | 1.14)  |        | 21.55)   | 32.11)   | 1.33)   |        | 28.03)  | 25.13)  | -0.43)  |        | 0.46)   | 0.42)   | -0.40)  |        |
| United Arab<br>Emirates | (2.34,  | (3.98,  | (1.09, | <0.001 | (18.99,  | (30.66,  | (1.05,  | <0.001 | (24.64, | (23.28, | (-0.60, | <0.001 | (0.13,  | (0.22,  | (-0.71, | 0.012  |
|                         | 4.79)   | 5.47)   | 1.19)  |        | 24.48)   | 33.67)   | 1.62)   |        | 31.84)  | 27.12)  | -0.25)  |        | 1.33)   | 0.79)   | -0.09)  |        |
| United Kingdom          | 8.49)   | 13.04)  | 1.46)  |        | 64.99)   | 102.27)  | 1.54)   |        | 8.99)   | 8.69)   | -0.06)  |        | 0.15)   | 0.15)   | 0.06)   |        |
|                         | (8.11,  | (12.59, | (1.24, | <0.001 | (63.92,  | (101.01, | (1.32,  | <0.001 | (8.59,  | (8.31,  | (-0.61, | 0.837  | (0.10,  | (0.10,  | (-0.62, | 0.854  |

|                    |         |         |         |        |          |          |         |        |         |         |         |        |        |        |         |        |
|--------------------|---------|---------|---------|--------|----------|----------|---------|--------|---------|---------|---------|--------|--------|--------|---------|--------|
|                    | 8.90)   | 13.52)  | 1.68)   |        | 66.08)   | 103.55)  | 1.76)   |        | 9.41)   | 9.08)   | 0.50)   |        | 0.21)  | 0.21)  | 0.75)   |        |
| United Republic of | 0.58    | 0.62    | 0.20    |        | 0.89     | 1.93     | 2.51    |        | 18.18   | 12.16   | -1.39   |        | 0.30   | 0.20   | -1.40   |        |
| Tanzania           | (0.43,  | (0.51,  | (0.07,  | 0.003  | (0.68,   | (1.72,   | (-1.67, | 0.243  | (17.30, | (11.69, | (-1.66, | <0.001 | (0.20, | (0.15, | (-1.61, | <0.001 |
|                    | 0.78)   | 0.74)   | 0.34)   |        | 1.14)    | 2.15)    | 6.86)   |        | 19.10)  | 12.64)  | -1.11)  |        | 0.45)  | 0.28)  | -1.18)  |        |
| United States of   | 59.48   | 61.62   | 0.09    |        | 479.86   | 498.66   | 0.10    |        | 16.21   | 9.23    | -1.90   |        | 0.27   | 0.15   | -2.05   |        |
| America            | (59.02, | (61.17, | (-0.03, | 0.129  | (478.57, | (497.38, | (-0.03, | 0.122  | (15.97, | (9.06,  | (-2.55, | <0.001 | (0.24, | (0.13, | (-2.94, | <0.001 |
|                    | 59.94)  | 62.08)  | 0.22)   |        | 481.15)  | 499.94)  | 0.23)   |        | 16.46)  | 9.41)   | -1.25)  |        | 0.31)  | 0.18)  | -1.14)  |        |
| United States      | 2.60    | 5.40    | 2.48    |        | 14.11    | 37.56    | 3.25    |        | 41.76   | 22.09   | -2.19   |        | 0.70   | 0.37   | -2.17   |        |
| Virgin Islands     | (0.07,  | (0.49,  | (2.11,  | <0.001 | (4.98,   | (19.52,  | (2.66,  | <0.001 | (24.10, | (8.77,  | (-2.67, | <0.001 | (0.00, | (0.00, | (-2.69, | <0.001 |
|                    | 14.97)  | 22.50)  | 2.86)   |        | 31.96)   | 66.18)   | 3.84)   |        | 67.72)  | 46.53)  | -1.70)  |        | 11.60) | 13.92) | -1.65)  |        |
|                    | 2.76    | 4.46    | 1.64    |        | 19.05    | 32.42    | 1.83    |        | 8.62    | 9.52    | 0.35    |        | 0.15   | 0.16   | 0.34    |        |
| Uruguay            | (1.88,  | (3.36,  | (1.52,  | <0.001 | (16.57,  | (29.33,  | (1.42,  | <0.001 | (6.99,  | (7.87,  | (0.05,  | 0.022  | (0.01, | (0.02, | (-0.50, | 0.427  |
|                    | 3.92)   | 5.82)   | 1.75)   |        | 21.78)   | 35.75)   | 2.24)   |        | 10.51)  | 11.42)  | 0.65)   |        | 0.60)  | 0.60)  | 1.19)   |        |
|                    | 8.81    | 10.39   | 0.58    |        | 69.42    | 80.46    | 0.53    |        | 2.86    | 8.42    | 3.69    |        | 0.05   | 0.14   | 3.72    |        |
| Uzbekistan         | (8.17,  | (9.87,  | (0.54,  | <0.001 | (67.55,  | (79.00,  | (0.48,  | <0.001 | (2.50,  | (7.95,  | (2.84,  | <0.001 | (0.01, | (0.08, | (2.43,  | <0.001 |
|                    | 9.50)   | 10.93)  | 0.62)   |        | 71.34)   | 81.95)   | 0.59)   |        | 3.25)   | 8.91)   | 4.55)   |        | 0.13)  | 0.21)  | 5.03)   |        |
|                    | 1.99    | 1.96    | -0.08   |        | 12.79    | 12.51    | -0.08   |        | 20.52   | 25.89   | 0.76    |        | 0.34   | 0.42   | 0.72    |        |
| Vanuatu            | (0.06,  | (0.27,  | (-0.20, | 0.172  | (4.85,   | (6.67,   | (-0.25, | 0.336  | (10.52, | (17.50, | (0.52,  | <0.001 | (0.00, | (0.00, | (0.22,  | 0.005  |
|                    | 11.39)  | 7.06)   | 0.04)   |        | 27.50)   | 21.48)   | 0.08)   |        | 36.71)  | 37.14)  | 1.01)   |        | 8.47)  | 4.52)  | 1.23)   |        |
| Venezuela          | 0.80    | 1.06    | 0.92    |        | 2.50     | 2.57     | -0.09   |        | 12.84   | 14.87   | 0.56    |        | 0.22   | 0.25   | 0.36    |        |
| (Bolivarian        | (0.61,  | (0.87,  | (0.82,  | <0.001 | (2.15,   | (2.29,   | (-2.89, | 0.953  | (12.05, | (14.15, | (-0.60, | 0.347  | (0.13, | (0.17, | (-0.79, | 0.545  |
| Republic of)       | 1.03)   | 1.27)   | 1.01)   |        | 2.91)    | 2.88)    | 2.80)   |        | 13.68)  | 15.62)  | 1.73)   |        | 0.36)  | 0.37)  | 1.51)   |        |
|                    | 0.97    | 1.20    | 0.75    |        | 5.67     | 7.15     | 0.79    |        | 3.89    | 3.14    | -0.74   |        | 0.07   | 0.05   | -1.26   |        |
| Viet Nam           | (0.85,  | (1.10,  | (0.70,  | <0.001 | (5.37,   | (6.91,   | (0.74,  | <0.001 | (3.65,  | (2.97,  | (-0.91, | <0.001 | (0.04, | (0.03, | (-1.26, | <0.001 |
|                    | 1.10)   | 1.32)   | 0.80)   |        | 5.98)    | 7.41)    | 0.85)   |        | 4.13)   | 3.31)   | -0.56)  |        | 0.11)  | 0.08)  | -1.26)  |        |
|                    | 1.52    | 1.49    | -0.06   |        | 9.74     | 9.48     | -0.13   |        | 18.11   | 18.48   | 0.12    |        | 0.31   | 0.31   | 0.23    |        |
| Yemen              | (1.16,  | (1.28,  | (-0.11, | 0.023  | (8.78,   | (8.93,   | (-0.23, | 0.011  | (16.84, | (17.73, | (-0.21, | 0.475  | (0.16, | (0.22, | (-0.18, | 0.271  |
|                    | 1.95)   | 1.73)   | -0.01)  |        | 10.78)   | 10.05)   | -0.03)  |        | 19.45)  | 19.25)  | 0.45)   |        | 0.54)  | 0.43)  | 0.64)   |        |
|                    | 0.65    | 0.64    | -0.11   |        | 2.05     | 1.97     | -0.01   |        | 16.44   | 14.06   | -0.57   |        | 0.27   | 0.24   | -0.45   |        |
| Zambia             | (0.37,  | (0.46,  | (-0.25, | 0.143  | (1.45,   | (1.62,   | (-0.35, | 0.978  | (14.92, | (13.20, | (-0.74, | <0.001 | (0.11, | (0.14, | (-0.71, | 0.001  |
|                    | 1.09)   | 0.87)   | 0.04)   |        | 2.82)    | 2.37)    | 0.34)   |        | 18.08)  | 14.97)  | -0.40)  |        | 0.59)  | 0.39)  | -0.19)  |        |
|                    | 0.79    | 0.84    | 0.20    |        | 2.42     | 2.45     | 0.04    |        | 14.58   | 18.99   | 0.91    |        | 0.24   | 0.32   | 0.90    |        |
| Zimbabwe           | (0.51,  | (0.62,  | (0.08,  | 0.002  | (1.87,   | (2.04,   | (-0.13, | 0.623  | (13.35, | (17.90, | (0.09,  | 0.030  | (0.11, | (0.19, | (-0.14, | 0.089  |

|                     |         |         |         |        |         |          |         |        |         |         |         |        |        |        |         |        |
|---------------------|---------|---------|---------|--------|---------|----------|---------|--------|---------|---------|---------|--------|--------|--------|---------|--------|
|                     | 1.17)   | 1.12)   | 0.33)   |        | 3.08)   | 2.91)    | 0.22)   |        | 15.91)  | 20.13)  | 1.74)   |        | 0.49)  | 0.50)  | 1.95)   |        |
| <b>Women</b>        |         |         |         |        |         |          |         |        |         |         |         |        |        |        |         |        |
|                     | 1.55    | 1.52    | -0.07   |        | 8.83    | 8.67     | -0.07   |        | 40.43   | 29.32   | -1.10   |        | 0.69   | 0.50   | -1.10   |        |
| Afghanistan         | (0.99,  | (1.22,  | (-0.16, | 0.097  | (7.30,  | (7.85,   | (-0.18, | 0.166  | (37.42, | (27.95, | (-1.26, | <0.001 | (0.35, | (0.34, | (-1.29, | <0.001 |
|                     | 2.36)   | 1.88)   | 0.01)   |        | 10.60)  | 9.55)    | 0.03)   |        | 43.66)  | 30.73)  | -0.94)  |        | 1.28)  | 0.73)  | -0.92)  |        |
|                     | 12.58   | 15.53   | 0.72    |        | 96.72   | 121.41   | 0.77    |        | 5.21    | 3.64    | -1.31   |        | 0.08   | 0.06   | -1.29   |        |
| Albania             | (10.01, | (12.16, | (0.70,  | <0.001 | (89.19, | (111.59, | (0.71,  | <0.001 | (3.63,  | (2.12,  | (-1.70, | <0.001 | (0.00, | (0.00, | (-2.64, | 0.067  |
|                     | 15.64)  | 19.57)  | 0.75)   |        | 104.74) | 131.89)  | 0.84)   |        | 7.29)   | 5.86)   | -0.91)  |        | 0.82)  | 0.99)  | 0.09)   |        |
|                     | 2.32    | 2.43    | 0.17    |        | 16.65   | 16.97    | 0.11    |        | 30.86   | 18.53   | -1.75   |        | 0.52   | 0.31   | -1.66   |        |
| Algeria             | (1.89,  | (2.12,  | (0.12,  | <0.001 | (15.38, | (16.15,  | (-0.03, | 0.132  | (29.25, | (17.64, | (-1.89, | <0.001 | (0.33, | (0.21, | (-1.81, | <0.001 |
|                     | 2.84)   | 2.78)   | 0.22)   |        | 18.00)  | 17.82)   | 0.24)   |        | 32.55)  | 19.47)  | -1.61)  |        | 0.79)  | 0.46)  | -1.50)  |        |
|                     | 3.55    | 3.78    | 0.13    |        | 25.68   | 27.14    | 0.14    |        | 12.94   | 24.51   | 2.22    |        | 0.21   | 0.41   | 2.27    |        |
| American Samoa      | (0.00,  | (0.00,  | (0.01,  | 0.039  | (3.56,  | (4.15,   | (-0.11, | 0.276  | (0.62,  | (3.84,  | (1.51,  | <0.001 | (0.00, | (0.00, | (1.50,  | <0.001 |
|                     | 54.16)  | 52.66)  | 0.25)   |        | 91.16)  | 91.79)   | 0.40)   |        | 69.30)  | 85.49)  | 2.94)   |        | 48.13) | 46.41) | 3.04)   |        |
|                     | 0.77    | 2.32    | 3.86    |        | 2.57    | 15.12    | 6.31    |        | 5.13    | 3.57    | -1.22   |        | 0.09   | 0.06   | -1.43   |        |
| Andorra             | (0.00,  | (0.00,  | (3.64,  | <0.001 | (0.00,  | (2.35,   | (4.78,  | <0.001 | (0.02,  | (0.00,  | (-1.39, | <0.001 | (0.00, | (0.00, | (-2.29, | 0.001  |
|                     | 44.03)  | 43.31)  | 4.08)   |        | 46.94)  | 61.18)   | 7.86)   |        | 51.18)  | 45.47)  | -1.06)  |        | 42.91) | 39.69) | -0.55)  |        |
|                     | 0.66    | 0.67    | 0.02    |        | 2.25    | 2.23     | -0.00   |        | 13.68   | 9.80    | -1.17   |        | 0.23   | 0.16   | -1.30   |        |
| Angola              | (0.33,  | (0.47,  | (-0.16, | 0.842  | (1.56,  | (1.81,   | (-0.33, | 0.984  | (12.05, | (8.99,  | (-2.07, | 0.012  | (0.06, | (0.07, | (-1.46, | <0.001 |
|                     | 1.18)   | 0.94)   | 0.19)   |        | 3.14)   | 2.72)    | 0.33)   |        | 15.49)  | 10.67)  | -0.26)  |        | 0.60)  | 0.32)  | -1.15)  |        |
|                     | 1.19    | 1.39    | 0.54    |        | 6.62    | 7.11     | 0.26    |        | 11.45   | 8.60    | -1.09   |        | 0.19   | 0.14   | -1.06   |        |
| Antigua and Barbuda | (0.00,  | (0.00,  | (0.48,  | <0.001 | (0.08,  | (0.42,   | (-0.01, | 0.058  | (0.82,  | (0.61,  | (-1.31, | <0.001 | (0.00, | (0.00, | (-1.35, | <0.001 |
|                     | 33.56)  | 26.62)  | 0.59)   |        | 43.67)  | 35.91)   | 0.53)   |        | 51.20)  | 38.92)  | -0.87)  |        | 31.64) | 24.37) | -0.77)  |        |
|                     | 2.94    | 3.66    | 0.74    |        | 21.15   | 24.17    | 0.48    |        | 10.29   | 6.36    | -1.62   |        | 0.17   | 0.11   | -1.46   |        |
| Argentina           | (2.53,  | (3.27,  | (0.69,  | <0.001 | (20.00, | (23.17,  | (0.11,  | 0.012  | (9.51,  | (5.85,  | (-1.94, | <0.001 | (0.08, | (0.05, | (-2.29, | 0.001  |
|                     | 3.41)   | 4.08)   | 0.80)   |        | 22.35)  | 25.20)   | 0.86)   |        | 11.13)  | 6.91)   | -1.30)  |        | 0.31)  | 0.20)  | -0.61)  |        |
|                     | 7.80    | 8.85    | 0.44    |        | 61.30   | 67.88    | 0.30    |        | 2.76    | 1.82    | -1.36   |        | 0.04   | 0.03   | -1.86   |        |
| Armenia             | (5.92,  | (6.66,  | (0.40,  | <0.001 | (55.80, | (61.76,  | (0.19,  | <0.001 | (1.69,  | (0.88,  | (-2.11, | <0.001 | (0.00, | (0.00, | (-4.98, | 0.255  |
|                     | 10.12)  | 11.71)  | 0.47)   |        | 67.23)  | 74.60)   | 0.41)   |        | 4.29)   | 3.51)   | -0.60)  |        | 0.67)  | 1.08)  | 1.37)   |        |
|                     | 3.25    | 9.54    | 3.80    |        | 22.80   | 74.05    | 4.12    |        | 7.25    | 4.71    | -1.50   |        | 0.12   | 0.08   | -1.45   |        |
| Australia           | (2.68,  | (8.65,  | (3.73,  | <0.001 | (21.26, | (71.60,  | (3.85,  | <0.001 | (6.38,  | (4.09,  | (-2.17, | <0.001 | (0.04, | (0.02, | (-2.41, | 0.003  |
|                     | 3.91)   | 10.50)  | 3.87)   |        | 24.42)  | 76.56)   | 4.39)   |        | 8.21)   | 5.40)   | -0.82)  |        | 0.31)  | 0.24)  | -0.49)  |        |
|                     | 6.72    | 9.14    | 1.08    | <0.001 | 49.97   | 72.55    | 1.35    | <0.001 | 7.89    | 8.72    | 0.42    | 0.322  | 0.13   | 0.15   | 0.36    | 0.037  |

|            |         |         |         |        |          |          |         |        |         |         |         |        |        |        |         |        |
|------------|---------|---------|---------|--------|----------|----------|---------|--------|---------|---------|---------|--------|--------|--------|---------|--------|
|            | (5.48,  | (7.66,  | (0.94,  |        | (46.46,  | (68.38,  | (1.07,  |        | (6.51,  | (7.23,  | (-0.41, |        | (0.02, | (0.02, | (0.02,  |        |
|            | 8.19)   | 10.85)  | 1.23)   |        | 53.70)   | 76.94)   | 1.63)   |        | 9.49)   | 10.47)  | 1.25)   |        | 0.53)  | 0.60)  | 0.69)   |        |
|            | 7.98    | 9.08    | 0.44    |        | 62.69    | 69.58    | 0.32    |        | 3.32    | 3.56    | 0.19    |        | 0.05   | 0.05   | -0.00   |        |
| Azerbaijan | (6.62,  | (7.88,  | (0.41,  | <0.001 | (58.69,  | (66.25,  | (0.19,  | <0.001 | (2.48,  | (2.74,  | (-0.11, | 0.207  | (0.00, | (0.00, | (-2.21, | 0.997  |
|            | 9.54)   | 10.44)  | 0.48)   |        | 66.90)   | 73.07)   | 0.45)   |        | 4.37)   | 4.56)   | 0.49)   |        | 0.38)  | 0.35)  | 2.25)   |        |
|            | 1.23    | 1.39    | 0.41    |        | 6.88     | 6.90     | -0.08   |        | 18.17   | 18.74   | 0.02    |        | 0.31   | 0.32   | 0.05    |        |
| Bahamas    | (0.01,  | (0.05,  | (0.33,  | <0.001 | (1.71,   | (2.40,   | (-0.26, | 0.361  | (8.90,  | (10.35, | (-0.77, | 0.971  | (0.00, | (0.00, | (-0.28, | 0.764  |
|            | 9.74)   | 7.72)   | 0.50)   |        | 18.75)   | 15.84)   | 0.09)   |        | 33.49)  | 31.40)  | 0.81)   |        | 8.11)  | 5.85)  | 0.38)   |        |
|            | 3.15    | 3.47    | 0.33    |        | 22.75    | 23.51    | 0.09    |        | 8.68    | 4.78    | -2.06   |        | 0.14   | 0.08   | -2.04   |        |
| Bahrain    | (0.67,  | (1.57,  | (0.28,  | <0.001 | (14.15,  | (18.27,  | (-0.06, | 0.220  | (3.72,  | (2.46,  | (-2.74, | <0.001 | (0.00, | (0.00, | (-3.61, | 0.012  |
|            | 9.65)   | 6.92)   | 0.37)   |        | 34.94)   | 30.06)   | 0.24)   |        | 17.47)  | 8.63)   | -1.39)  |        | 4.93)  | 2.15)  | -0.45)  |        |
|            | 0.41    | 0.46    | 0.37    |        |          |          |         |        | 14.40   | 8.53    | -1.77   |        | 0.24   | 0.14   | -1.75   |        |
| Bangladesh | (0.32,  | (0.39,  | (0.02,  | 0.037  | —        | —        | —       | —      | (13.87, | (8.23,  | (-2.15, | <0.001 | (0.17, | (0.10, | (-2.08, | <0.001 |
|            | 0.52)   | 0.54)   | 0.71)   |        |          |          |         |        | 14.94)  | 8.85)   | -1.39)  |        | 0.32)  | 0.19)  | -1.43)  |        |
|            | 1.04    | 1.28    | 0.74    |        | 5.51     | 5.76     | 0.18    |        | 10.41   | 9.23    | -0.38   |        | 0.17   | 0.15   | -0.33   |        |
| Barbados   | (0.00,  | (0.01,  | (0.67,  | <0.001 | (1.19,   | (1.28,   | (0.13,  | <0.001 | (3.70,  | (2.83,  | (-0.81, | 0.079  | (0.00, | (0.00, | (-0.92, | 0.273  |
|            | 9.17)   | 10.56)  | 0.82)   |        | 16.26)   | 17.32)   | 0.24)   |        | 23.37)  | 22.74)  | 0.05)   |        | 7.59)  | 8.57)  | 0.26)   |        |
|            | 15.45   | 17.65   | 0.48    |        | 121.81   | 138.37   | 0.47    |        | 1.51    | 1.57    | 0.07    |        | 0.02   | 0.02   | 0.45    |        |
| Belarus    | (13.80, | (15.68, | (0.39,  | <0.001 | (117.18, | (133.05, | (0.42,  | <0.001 | (1.02,  | (1.01,  | (-0.83, | 0.881  | (0.00, | (0.00, | (-0.76, | 0.469  |
|            | 17.24)  | 19.84)  | 0.57)   |        | 126.59)  | 143.90)  | 0.52)   |        | 2.17)   | 2.38)   | 0.97)   |        | 0.26)  | 0.41)  | 1.67)   |        |
|            | 0.39    | 0.63    | 1.64    |        |          |          |         |        | 6.45    | 4.36    | -1.39   |        | 0.11   | 0.07   | -1.53   |        |
| Belgium    | (0.16,  | (0.32,  | (1.37,  | <0.001 | —        | —        | —       | —      | (5.34,  | (3.44,  | (-1.80, | <0.001 | (0.01, | (0.00, | (-2.18, | <0.001 |
|            | 0.81)   | 1.14)   | 1.91)   |        |          |          |         |        | 7.75)   | 5.47)   | -0.99)  |        | 0.42)  | 0.38)  | -0.87)  |        |
|            | 0.95    | 1.20    | 0.81    |        | 5.29     | 5.58     | 0.21    |        | 6.84    | 9.71    | 1.11    |        | 0.11   | 0.16   | 1.03    |        |
| Belize     | (0.00,  | (0.03,  | (0.67,  | <0.001 | (0.32,   | (1.68,   | (-0.02, | 0.074  | (1.01,  | (4.36,  | (0.25,  | 0.011  | (0.00, | (0.00, | (0.01,  | 0.049  |
|            | 16.88)  | 6.79)   | 0.96)   |        | 24.60)   | 13.59)   | 0.44)   |        | 25.80)  | 18.89)  | 1.97)   |        | 15.40) | 4.92)  | 2.07)   |        |
|            | 0.57    | 0.63    | 0.36    |        | 1.92     | 2.08     | 0.31    |        | 14.55   | 17.26   | 0.62    |        | 0.23   | 0.27   | 0.68    |        |
| Benin      | (0.18,  | (0.34,  | (0.19,  | <0.001 | (1.04,   | (1.48,   | (0.16,  | <0.001 | (12.19, | (15.68, | (0.45,  | <0.001 | (0.03, | (0.11, | (0.42,  | <0.001 |
|            | 1.40)   | 1.07)   | 0.54)   |        | 3.27)    | 2.84)    | 0.46)   |        | 17.27)  | 18.96)  | 0.80)   |        | 0.90)  | 0.60)  | 0.95)   |        |
|            | 2.27    | 2.31    | 0.05    |        | 12.72    | 11.84    | -0.37   |        | 34.03   | 16.50   | -2.74   |        | 0.56   | 0.27   | -2.63   |        |
| Bermuda    | (0.00,  | (0.00,  | (-0.17, | 0.685  | (1.45,   | (0.78,   | (-0.81, | 0.103  | (9.79,  | (1.20,  | (-3.11, | <0.001 | (0.00, | (0.00, | (-3.09, | <0.001 |
|            | 44.52)  | 56.34)  | 0.26)   |        | 59.31)   | 69.43)   | 0.08)   |        | 91.68)  | 79.38)  | -2.38)  |        | 41.99) | 53.08) | -2.17)  |        |
| Bhutan     | 0.45    | 0.52    | 0.45    | <0.001 | —        | 1.83     | —       | —      | 7.34    | 5.69    | -0.88   | <0.001 | 0.12   | 0.10   | -0.80   | <0.001 |



|                          |                |                |                |        |                  |                  |                |               |                |                |                |              |              |                |                |        |
|--------------------------|----------------|----------------|----------------|--------|------------------|------------------|----------------|---------------|----------------|----------------|----------------|--------------|--------------|----------------|----------------|--------|
|                          | (0.00, 5.23)   | (0.01, 3.33)   | (0.37, 0.54)   |        | (0.36, 5.49)     |                  |                | (3.14, 15.06) | (2.65, 10.73)  | (-1.14, -0.62) |                | (0.00, 4.65) | (0.00, 2.56) | (-1.07, -0.52) |                |        |
| Bolivia                  | 0.79           | 0.81           | 0.04           |        | 2.69             | 2.29             | -0.57          | 18.58         | 10.65          | -1.89          |                | 0.31         | 0.18         | -1.89          |                |        |
| (Plurinational State of) | (0.36, 1.52)   | (0.49, 1.27)   | (-0.23, 0.32)  | 0.754  | (1.79, 3.89)     | (1.70, 3.01)     | (-0.94, -0.20) | 0.002         | (16.24, 21.17) | (9.39, 12.05)  | (-2.04, -1.73) | <0.001       | (0.08, 0.84) | (0.05, 0.45)   | (-2.10, -1.68) | <0.001 |
| Bosnia and Herzegovina   | 12.53          | 16.72          | 1.00           |        | 96.93            | 131.37           | 1.06           | 7.14          | 7.40           | 0.13           |                | 0.12         | 0.13         | 0.35           |                |        |
|                          | (10.38, 15.01) | (13.46, 20.59) | (0.87, 1.12)   | <0.001 | (90.77, 103.40)  | (122.12, 141.19) | (0.82, 1.30)   | <0.001        | (5.54, 9.08)   | (5.31, 10.12)  | (-0.50, 0.77)  | 0.681        | (0.00, 0.65) | (0.00, 1.10)   | (-0.42, 1.12)  | 0.377  |
| Botswana                 | 0.85           | 1.03           | 0.66           |        | 2.82             | 5.82             | 2.95           |               | 18.32          | 15.88          | -0.49          |              | 0.31         | 0.27           | -0.50          |        |
|                          | (0.10, 3.29)   | (0.36, 2.34)   | (0.55, 0.77)   | <0.001 | (0.98, 6.34)     | (4.00, 8.24)     | (2.26, 3.65)   | <0.001        | (13.39, 24.63) | (12.69, 19.66) | (-0.79, -0.19) | 0.001        | (0.00, 2.42) | (0.02, 1.23)   | (-1.07, 0.07)  | 0.088  |
| Brazil                   | 1.94           | 1.81           | -0.31          |        | 12.36            | 8.92             | -1.20          |               | 30.41          | 13.65          | -2.78          |              | 0.52         | 0.23           | -2.80          |        |
|                          | (1.78, 2.10)   | (1.69, 1.94)   | (-0.48, -0.13) | 0.001  | (11.96, 12.77)   | (8.66, 9.19)     | (-1.44, -0.95) | <0.001        | (29.80, 31.04) | (13.30, 13.99) | (-2.88, -2.67) | <0.001       | (0.44, 0.61) | (0.19, 0.28)   | (-2.92, -2.67) | <0.001 |
| Brunei Darussalam        | 22.22          | 24.47          | 0.32           |        | 174.53           | 194.25           | 0.34           |               | 11.65          | 13.07          | 0.37           |              | 0.19         | 0.22           | 0.48           |        |
|                          | (11.68, 38.74) | (15.69, 36.79) | (0.26, 0.38)   | <0.001 | (141.40, 213.32) | (168.06, 223.72) | (0.26, 0.42)   | <0.001        | (4.49, 25.03)  | (6.83, 23.06)  | (0.10, 0.65)   | 0.008        | (0.00, 7.76) | (0.00, 5.15)   | (0.19, 0.77)   | 0.001  |
| Bulgaria                 | 13.81          | 17.95          | 0.90           |        | 107.88           | 142.28           | 0.94           |               | 7.94           | 8.32           | 0.25           |              | 0.13         | 0.13           | 0.19           |        |
|                          | (12.01, 15.82) | (15.47, 20.77) | (0.87, 0.93)   | <0.001 | (102.82, 113.14) | (135.44, 149.43) | (0.81, 1.07)   | <0.001        | (6.56, 9.53)   | (6.53, 10.47)  | (-0.61, 1.12)  | 0.564        | (0.01, 0.49) | (0.01, 0.75)   | (-0.59, 0.98)  | 0.637  |
| Burkina Faso             | 0.48           | 0.55           | 0.44           |        |                  | 1.85             |                |               | 13.95          | 15.69          | 0.53           |              | 0.23         | 0.25           | 0.41           |        |
|                          | (0.20, 0.99)   | (0.35, 0.84)   | (0.27, 0.62)   | <0.001 | —                | (1.43, 2.35)     | —              | —             | (12.24, 15.87) | (14.55, 16.90) | (0.20, 0.85)   | 0.001        | (0.06, 0.63) | (0.13, 0.46)   | (-0.10, 0.93)  | 0.113  |
| Burundi                  | 0.61           | 0.42           | -1.31          |        | 2.07             |                  |                |               | 24.53          | 11.52          | -2.60          |              | 0.41         | 0.19           | -2.69          |        |
|                          | (0.22, 1.39)   | (0.19, 0.82)   | (-1.57, -1.05) | <0.001 | (1.19, 3.33)     | —                | —              | —             | (21.58, 27.79) | (10.16, 13.02) | (-2.89, -2.31) | <0.001       | (0.11, 1.09) | (0.05, 0.50)   | (-2.99, -2.38) | <0.001 |
| Cabo Verde               | 0.73           | 0.88           | 0.64           |        | 2.54             | 5.04             | 2.29           |               | 19.25          | 18.53          | -0.53          |              | 0.31         | 0.30           | -0.54          |        |
|                          | (0.00, 9.54)   | (0.03, 4.93)   | (0.55, 0.74)   | <0.001 | (0.09, 13.03)    | (1.83, 11.14)    | (1.74, 2.85)   | <0.001        | (10.16, 34.39) | (11.59, 28.18) | (-1.39, 0.34)  | 0.234        | (0.00, 8.79) | (0.00, 3.90)   | (-1.57, 0.51)  | 0.315  |
| Cambodia                 | 0.89           | 1.07           | 0.62           |        | 5.43             | 6.35             | 0.61           |               | 3.65           | 2.24           | -1.66          |              | 0.06         | 0.04           | -1.37          |        |
|                          | (0.52, 1.45)   | (0.75, 1.47)   | (0.57, 0.67)   | <0.001 | (4.39, 6.66)     | (5.54, 7.25)     | (0.48, 0.74)   | <0.001        | (2.85, 4.61)   | (1.77, 2.79)   | (-1.77, -1.56) | <0.001       | (0.00, 0.33) | (0.00, 0.18)   | (-1.37, -1.37) | <0.001 |
| Cameroon                 | 0.66           | 0.66           | -0.05          | 0.393  | 2.28             | 2.20             | -0.26          | <0.001        | 17.72          | 19.38          | 0.33           | <0.001       | 0.29         | 0.31           | 0.34           | 0.048  |

|                             |                           |                           |                            |        |                            |                            |                            |        |                            |                            |                            |                 |                           |                           |                         |        |
|-----------------------------|---------------------------|---------------------------|----------------------------|--------|----------------------------|----------------------------|----------------------------|--------|----------------------------|----------------------------|----------------------------|-----------------|---------------------------|---------------------------|-------------------------|--------|
|                             | (0.33,<br>1.19)           | (0.46,<br>0.91)           | (-0.15,<br>0.06)           |        | (1.56,<br>3.22)            | (1.80,<br>2.67)            | (-0.37,<br>-0.15)          |        | (15.89,<br>19.72)          | (18.29,<br>20.52)          | (0.15,<br>0.51)            | (0.10,<br>0.69) | (0.19,<br>0.50)           | (0.00,<br>0.68)           |                         |        |
|                             | 28.29                     | 28.50                     | 0.03                       |        | 224.44                     | 224.45                     | -0.01                      |        | 4.72                       | 4.41                       | -0.27                      | 0.08            | 0.07                      | -0.51                     |                         |        |
| Canada                      | (26.96,<br>29.68)         | (27.18,<br>29.88)         | (0.02,<br>0.04)            | <0.001 | (220.72,<br>228.20)        | (220.80,<br>228.16)        | (-0.04,<br>0.02)           | 0.534  | (4.18,<br>5.32)            | (3.90,<br>4.98)            | (-0.56,<br>0.02)           | 0.067           | (0.02,<br>0.20)           | (0.02,<br>0.19)           | (-1.26,<br>0.25)        | 0.185  |
| Central African<br>Republic | 0.48<br>(0.07,<br>1.75)   | 0.42<br>(0.12,<br>1.11)   | -0.51<br>(-0.66,<br>-0.35) | <0.001 | —<br>—                     | —<br>—                     | —<br>—                     | —<br>— | 13.39<br>(10.36,<br>17.11) | 10.39<br>(8.52,<br>12.59)  | -0.87<br>(-1.23,<br>-0.51) | <0.001          | 0.22<br>(0.01,<br>1.35)   | 0.17<br>(0.02,<br>0.73)   | (-0.86,<br>-1.49)       | 0.008  |
| Chad                        | 0.48<br>(0.15,<br>1.17)   | 0.57<br>(0.32,<br>0.96)   | 0.60<br>(0.33,<br>0.86)    | <0.001 | —<br>—                     | (1.37,<br>2.61)            | —<br>—                     | —<br>— | 14.45<br>(12.29,<br>16.90) | 16.93<br>(15.49,<br>18.49) | 0.62<br>(0.30,<br>0.95)    | <0.001          | 0.23<br>(0.04,<br>0.80)   | 0.27<br>(0.12,<br>0.56)   | 0.64<br>(0.19,<br>1.09) | 0.006  |
| Chile                       | 3.12<br>(2.50,<br>3.85)   | 4.98<br>(4.27,<br>5.78)   | 1.62<br>(1.58,<br>1.66)    | <0.001 | 22.19<br>(20.45,<br>24.03) | 36.61<br>(34.67,<br>38.64) | 1.73<br>(1.48,<br>1.98)    | <0.001 | 7.83<br>(6.84,<br>8.94)    | 6.60<br>(5.77,<br>7.53)    | -0.51<br>(-1.07,<br>0.05)  | 0.074           | 0.13<br>(0.03,<br>0.36)   | 0.11<br>(0.03,<br>0.30)   | (-0.63,<br>-1.86)       | 0.318  |
| China                       | 3.79<br>(3.71,<br>3.86)   | 4.44<br>(4.36,<br>4.52)   | 0.55<br>(0.49,<br>0.61)    | <0.001 | 28.71<br>(28.50,<br>28.93) | 32.10<br>(31.89,<br>32.31) | 0.36<br>(0.23,<br>0.50)    | <0.001 | 4.32<br>(4.24,<br>4.40)    | 1.95<br>(1.89,<br>2.01)    | -2.74<br>(-3.11,<br>-2.37) | <0.001          | 0.07<br>(0.06,<br>0.08)   | 0.03<br>(0.03,<br>0.04)   | (-2.98,<br>-1.26)       | 0.001  |
| Colombia                    | 1.06<br>(0.83,<br>1.34)   | 1.29<br>(1.07,<br>1.53)   | 0.65<br>(0.42,<br>0.87)    | <0.001 | 5.84<br>(5.24,<br>6.48)    | 6.03<br>(5.55,<br>6.54)    | 0.06<br>(-0.55,<br>0.66)   | 0.854  | 18.21<br>(17.21,<br>19.26) | 14.53<br>(13.78,<br>15.31) | -0.76<br>(-1.50,<br>-0.01) | 0.047           | 0.31<br>(0.19,<br>0.48)   | 0.25<br>(0.16,<br>0.37)   | (-0.77,<br>-1.54)       | 0.052  |
| Comoros                     | 0.80<br>(0.00,<br>7.40)   | 0.62<br>(0.01,<br>4.05)   | -0.88<br>(-1.04,<br>-0.72) | <0.001 | 2.73<br>(0.25,<br>10.89)   | 2.07<br>(0.36,<br>6.48)    | -0.89<br>(-2.72,<br>0.97)  | 0.347  | 19.98<br>(11.50,<br>32.93) | 12.69<br>(7.55,<br>20.13)  | -1.58<br>(-4.77,<br>1.71)  | 0.343           | 0.33<br>(0.00,<br>6.55)   | 0.21<br>(0.00,<br>3.31)   | (-1.62,<br>1.59)        | 0.319  |
| Congo                       | 0.76<br>(0.16,<br>2.28)   | 0.67<br>(0.27,<br>1.38)   | -0.48<br>(-0.66,<br>-0.29) | <0.001 | 2.63<br>(1.21,<br>4.97)    | 2.30<br>(1.47,<br>3.42)    | -0.54<br>(-0.77,<br>-0.31) | <0.001 | 14.83<br>(11.43,<br>19.00) | 10.43<br>(8.59,<br>12.56)  | -1.24<br>(-2.00,<br>-0.47) | 0.002           | 0.25<br>(0.01,<br>1.49)   | 0.18<br>(0.02,<br>0.66)   | (-1.03,<br>-0.21)       | 0.014  |
| Cook Islands                | 3.21<br>(0.00,<br>127.04) | 3.50<br>(0.00,<br>130.91) | 0.30<br>(0.28,<br>0.32)    | <0.001 | 23.38<br>(0.21,<br>164.41) | 25.12<br>(0.24,<br>171.62) | 0.27<br>(0.20,<br>0.33)    | <0.001 | 6.37<br>(0.00,<br>132.72)  | 4.02<br>(0.00,<br>131.81)  | -1.55<br>(-1.75,<br>-1.35) | <0.001          | 0.11<br>(0.00,<br>121.10) | 0.07<br>(0.00,<br>123.96) | (-1.47,<br>-0.69)       | <0.001 |
| Costa Rica                  | 0.89<br>(0.31,<br>2.06)   | 1.21<br>(0.64,<br>2.14)   | 1.06<br>(0.99,<br>1.13)    | <0.001 | 2.85<br>(1.60,<br>4.69)    | 5.16<br>(3.88,<br>6.76)    | 2.43<br>(1.90,<br>2.95)    | <0.001 | 6.24<br>(4.43,<br>8.57)    | 6.84<br>(5.32,<br>8.69)    | 0.53<br>(0.29,<br>0.78)    | <0.001          | 0.11<br>(0.00,<br>0.88)   | 0.12<br>(0.00,<br>0.64)   | 0.57<br>(0.30,<br>0.84) | <0.001 |
| Cote d'Ivoire               | 0.62                      | 0.66                      | 0.24                       | <0.001 | 2.09                       | 2.21                       | 0.27                       | 0.015  | 16.00                      | 16.96                      | 0.21                       | 0.200           | 0.26                      | 0.27                      | 0.16                    | 0.603  |

|                                             |                         |                         |                            |        |                            |                            |                            |        |                            |                          |                            |                 |                         |                         |                            |        |
|---------------------------------------------|-------------------------|-------------------------|----------------------------|--------|----------------------------|----------------------------|----------------------------|--------|----------------------------|--------------------------|----------------------------|-----------------|-------------------------|-------------------------|----------------------------|--------|
|                                             | (0.32,<br>1.10)         | (0.45,<br>0.93)         | (0.14,<br>0.34)            |        | (1.43,<br>2.95)            | (1.79,<br>2.69)            | (0.05,<br>0.49)            |        | (14.40,<br>17.75)          | (15.88,<br>18.10)        | (-0.11,<br>0.52)           | (0.09,<br>0.61) | (0.15,<br>0.46)         | (-0.43,<br>0.74)        |                            |        |
|                                             | 17.34                   | 23.17                   | 1.02                       |        | 135.27                     | 183.86                     | 1.07                       |        | 5.10                       | 5.17                     | -0.08                      | 0.09            | 0.09                    | -0.01                   |                            |        |
| Croatia                                     | (14.79,<br>20.24)       | (19.69,<br>27.15)       | (0.95,<br>1.09)            | <0.001 | (128.09,<br>142.79)        | (174.11,<br>194.10)        | (0.93,<br>1.21)            | <0.001 | (3.75,<br>6.80)            | (3.61,<br>7.25)          | (-2.01,<br>1.90)           | 0.939           | (0.00,<br>0.63)         | (0.00,<br>0.92)         | (-0.99,<br>0.99)           | 0.989  |
|                                             | 1.25                    | 1.46                    | 0.52                       |        | 6.67                       | 6.72                       | 0.01                       |        | 15.41                      | 12.15                    | -0.89                      | 0.26            | 0.21                    | -0.83                   |                            |        |
| Cuba                                        | (0.83,<br>1.81)         | (0.96,<br>2.15)         | (0.43,<br>0.62)            | <0.001 | (5.59,<br>7.91)            | (5.61,<br>8.02)            | (-0.19,<br>0.21)           | 0.911  | (13.83,<br>17.12)          | (10.58,<br>13.89)        | (-1.47,<br>-0.31)          | 0.003           | (0.09,<br>0.58)         | (0.05,<br>0.57)         | (-1.48,<br>-0.18)          | 0.012  |
|                                             | 0.21                    | 1.29                    | 6.62                       |        |                            | 6.91                       |                            |        | 6.40                       | 3.36                     | -2.26                      | 0.10            | 0.05                    | -2.68                   |                            |        |
| Cyprus                                      | (0.00,<br>3.15)         | (0.31,<br>4.29)         | (5.56,<br>7.69)            | <0.001 | —                          | (4.38,<br>11.05)           | —                          | —      | (3.01,<br>12.06)           | (1.40,<br>7.25)          | (-3.12,<br>-1.38)          | <0.001          | (0.00,<br>2.96)         | (0.00,<br>2.63)         | (-3.82,<br>-1.53)          | <0.001 |
|                                             | 12.85                   | 18.29                   | 1.23                       |        | 99.41                      | 145.11                     | 1.34                       |        | 4.56                       | 10.70                    | 2.99                       | 0.07            | 0.18                    | 3.19                    |                            |        |
| Czechia                                     | (11.28,<br>14.60)       | (16.27,<br>20.54)       | (1.20,<br>1.25)            | <0.001 | (95.02,<br>103.96)         | (139.56,<br>150.87)        | (1.19,<br>1.49)            | <0.001 | (3.64,<br>5.66)            | (9.10,<br>12.53)         | (1.87,<br>4.12)            | <0.001          | (0.00,<br>0.36)         | (0.03,<br>0.62)         | (2.76,<br>3.63)            | <0.001 |
| Democratic<br>People's Republic<br>of Korea | 2.96<br>(2.45,<br>3.55) | 2.73<br>(2.28,<br>3.23) | -0.28<br>(-0.34,<br>-0.23) | <0.001 | 21.59<br>(20.13,<br>23.14) | 19.54<br>(18.33,<br>20.81) | -0.37<br>(-0.44,<br>-0.30) |        | 5.27<br>(4.60,<br>6.02)    | 3.81<br>(3.28,<br>4.42)  | -1.12<br>(-1.17,<br>-1.06) |                 | 0.09<br>(0.02,<br>0.25) | 0.06<br>(0.01,<br>0.19) | -1.47<br>(-2.54,<br>-0.40) | 0.007  |
| Democratic<br>Republic of the<br>Congo      | 0.53<br>(0.37,<br>0.75) | 0.46<br>(0.36,<br>0.58) | -0.53<br>(-0.77,<br>-0.29) | <0.001 | —                          | —                          | —                          | —      | 12.81<br>(11.97,<br>13.70) | 8.89<br>(8.44,<br>9.37)  | -1.28<br>(-1.45,<br>-1.11) |                 | 0.21<br>(0.12,<br>0.36) | 0.15<br>(0.09,<br>0.22) | -1.30<br>(-1.49,<br>-1.10) | <0.001 |
|                                             | 0.35                    | 1.72                    | 5.61                       |        |                            | 8.80                       |                            |        | 3.46                       | 2.39                     | -1.15                      |                 | 0.06                    | 0.04                    | -1.39                      |        |
| Denmark                                     | (0.08,<br>1.02)         | (0.98,<br>2.85)         | (5.15,<br>6.06)            | <0.001 | —                          | (6.97,<br>10.99)           | —                          | —      | (2.38,<br>4.89)            | (1.49,<br>3.67)          | (-2.13,<br>-0.15)          | 0.024           | (0.00,<br>0.56)         | (0.00,<br>0.56)         | (-2.58,<br>-0.19)          | 0.023  |
|                                             | 0.74                    | 0.64                    | -0.52                      |        | 2.59                       | 2.24                       | -0.52                      |        | 15.21                      | 8.59                     | -1.98                      |                 | 0.25                    | 0.14                    | -1.92                      |        |
| Djibouti                                    | (0.00,<br>6.95)         | (0.05,<br>2.83)         | (-0.71,<br>-0.32)          | <0.001 | (0.24,<br>10.26)           | (0.82,<br>5.10)            | (-0.90,<br>-0.14)          | 0.007  | (8.00,<br>26.77)           | (5.32,<br>13.25)         | (-2.76,<br>-1.19)          | <0.001          | (0.00,<br>6.06)         | (0.00,<br>2.03)         | (-2.80,<br>-1.03)          | <0.001 |
|                                             | 0.86                    | 1.03                    | 0.64                       |        | 2.79                       | 4.98                       | 2.03                       |        | 4.25                       | 4.09                     | -0.11                      |                 | 0.07                    | 0.07                    | 0.00                       |        |
| Dominica                                    | (0.00,<br>36.46)        | (0.00,<br>32.08)        | (0.46,<br>0.82)            | <0.001 | (0.00,<br>40.49)           | (0.02,<br>39.53)           | (1.58,<br>2.48)            | <0.001 | (0.01,<br>42.11)           | (0.00,<br>37.94)         | (-0.66,<br>0.44)           | 0.690           | (0.00,<br>34.98)        | (0.00,<br>30.14)        | (-1.96,<br>2.00)           | 0.999  |
| Dominican<br>Republic                       | 0.90<br>(0.47,<br>1.57) | 1.16<br>(0.75,<br>1.71) | 0.88<br>(0.84,<br>0.92)    | <0.001 | 4.96<br>(3.79,<br>6.37)    | 5.82<br>(4.83,<br>6.95)    | 0.56<br>(0.44,<br>0.68)    |        | 9.89<br>(8.42,<br>11.58)   | 9.09<br>(7.88,<br>10.44) | -0.24<br>(-0.51,<br>0.04)  |                 | 0.16<br>(0.03,<br>0.56) | 0.15<br>(0.03,<br>0.42) | -0.18<br>(-1.21,<br>0.87)  | 0.741  |
| Ecuador                                     | 0.96                    | 1.60                    | 1.78                       | <0.001 | 5.13                       | 5.61                       | 0.37                       | 0.747  | 17.66                      | 13.76                    | -1.02                      | 0.001           | 0.29                    | 0.23                    | -0.94                      | 0.009  |

|                   |                |                |                |        |                  |                  |               |        |                |                |                |        |              |              |                |        |
|-------------------|----------------|----------------|----------------|--------|------------------|------------------|---------------|--------|----------------|----------------|----------------|--------|--------------|--------------|----------------|--------|
|                   | (0.57, 1.53)   | (1.21, 2.08)   | (1.59, 1.96)   |        | (4.11, 6.32)     | (4.84, 6.46)     | (-1.85, 2.63) |        | (15.87, 19.60) | (12.57, 15.03) | (-1.64, -0.41) |        | (0.10, 0.67) | (0.10, 0.45) | (-1.64, -0.24) |        |
|                   | 2.17           | 2.44           | 0.42           |        | 15.63            | 17.39            | 0.37          |        | 47.37          | 33.20          | -1.20          |        | 0.77         | 0.55         | -1.10          |        |
| Egypt             | (1.89, 2.49)   | (2.23, 2.67)   | (0.35, 0.48)   | <0.001 | (14.84, 16.46)   | (16.80, 17.98)   | (0.12, 0.62)  | 0.004  | (46.06, 48.71) | (32.40, 34.01) | (-1.60, -0.81) | <0.001 | (0.61, 0.97) | (0.45, 0.66) | (-1.54, -0.66) | <0.001 |
|                   | 0.64           | 0.90           | 1.23           |        | 2.01             | 2.34             | 0.57          |        | 3.62           | 3.27           | -0.48          |        | 0.06         | 0.06         | -0.26          |        |
| El Salvador       | (0.23, 1.42)   | (0.46, 1.59)   | (1.12, 1.34)   | <0.001 | (1.15, 3.26)     | (1.57, 3.37)     | (0.43, 0.72)  | <0.001 | (2.53, 5.05)   | (2.37, 4.41)   | (-1.41, 0.47)  | 0.321  | (0.00, 0.57) | (0.00, 0.40) | (-1.05, 0.53)  | 0.515  |
|                   | 0.56           | 0.87           | 1.56           |        | 1.87             | 5.28             | 3.99          |        | 13.32          | 8.02           | -1.75          |        | 0.22         | 0.14         | -1.58          |        |
| Equatorial Guinea | (0.00, 6.49)   | (0.12, 3.14)   | (1.45, 1.68)   | <0.001 | (0.10, 8.84)     | (2.74, 9.25)     | (2.85, 5.14)  | <0.001 | (6.51, 24.53)  | (4.97, 12.38)  | (-2.29, -1.21) | <0.001 | (0.00, 5.85) | (0.00, 1.94) | (-2.17, -0.97) | <0.001 |
|                   | 0.60           | 0.55           | -0.32          |        | 1.98             | 1.94             | -0.12         |        | 17.13          | 10.87          | -1.67          |        | 0.29         | 0.18         | -1.68          |        |
| Eritrea           | (0.12, 1.81)   | (0.22, 1.16)   | (-0.55, -0.09) | 0.006  | (0.88, 3.80)     | (1.20, 2.97)     | (-0.42, 0.18) | 0.433  | (13.79, 21.08) | (9.16, 12.83)  | (-1.80, -1.53) | <0.001 | (0.02, 1.33) | (0.03, 0.64) | (-1.84, -1.51) | <0.001 |
|                   | 17.92          | 21.37          | 0.61           |        | 141.12           | 169.03           | 0.63          |        | 2.38           | 3.58           | 1.61           |        | 0.04         | 0.06         | 2.39           |        |
| Estonia           | (13.44, 23.52) | (15.61, 28.93) | (0.59, 0.63)   | <0.001 | (128.20, 155.09) | (152.65, 187.02) | (0.54, 0.72)  | <0.001 | (0.94, 5.09)   | (1.37, 7.95)   | (0.59, 2.63)   | 0.002  | (0.00, 1.58) | (0.00, 2.80) | (1.99, 2.79)   | <0.001 |
|                   | 0.89           | 0.93           | 0.15           |        | 4.92             | 5.21             | 0.20          |        | 16.54          | 14.58          | -0.45          |        | 0.28         | 0.24         | -0.54          |        |
| Eswatini          | (0.04, 4.80)   | (0.14, 3.25)   | (-0.01, 0.31)  | 0.059  | (1.78, 10.90)    | (2.68, 9.15)     | (-0.09, 0.48) | 0.182  | (10.64, 24.84) | (10.27, 20.19) | (-0.76, -0.15) | 0.004  | (0.00, 3.77) | (0.00, 2.14) | (-0.99, -0.08) | 0.022  |
|                   | 0.52           | 0.48           | -0.33          |        | 0.08             |                  |               |        | 20.14          | 7.73           | -3.24          |        | 0.34         | 0.13         | -3.23          |        |
| Ethiopia          | (0.38, 0.70)   | (0.39, 0.59)   | (-0.45, -0.20) | <0.001 | (0.03, 0.17)     | —                | —             | —      | (19.23, 21.09) | (7.36, 8.12)   | (-3.40, -3.08) | <0.001 | (0.23, 0.48) | (0.08, 0.19) | (-3.55, -2.91) | <0.001 |
|                   | 3.06           | 3.40           | 0.29           |        | 21.86            | 24.60            | 0.32          |        | 16.03          | 14.93          | -0.21          |        | 0.26         | 0.24         | -0.21          |        |
| Fiji              | (0.93, 7.55)   | (1.25, 7.44)   | (0.12, 0.46)   | 0.001  | (14.90, 31.03)   | (17.87, 33.07)   | (0.16, 0.47)  | <0.001 | (10.40, 23.77) | (9.77, 21.87)  | (-0.82, 0.41)  | 0.503  | (0.00, 3.23) | (0.00, 2.65) | (-0.93, 0.51)  | 0.566  |
|                   | 1.63           | 5.32           | 4.13           |        | 9.23             | 39.37            | 4.90          |        | 4.49           | 3.22           | -1.22          |        | 0.08         | 0.06         | -1.02          |        |
| Finland           | (0.92, 2.73)   | (3.89, 7.14)   | (3.82, 4.43)   | <0.001 | (7.48, 11.33)    | (35.42, 43.70)   | (4.15, 5.66)  | <0.001 | (3.25, 6.12)   | (2.14, 4.71)   | (-1.68, -0.77) | <0.001 | (0.00, 0.67) | (0.00, 0.65) | (-2.21, 0.18)  | 0.097  |
|                   | 0.64           | 1.22           | 2.24           |        | 2.13             | 4.50             | 2.34          |        | 8.17           | 4.15           | -2.34          |        | 0.14         | 0.07         | -2.45          |        |
| France            | (0.51, 0.81)   | (1.02, 1.45)   | (2.05, 2.43)   | <0.001 | (1.88, 2.40)     | (4.13, 4.91)     | (1.62, 3.07)  | <0.001 | (7.65, 8.73)   | (3.76, 4.57)   | (-2.90, -1.77) | <0.001 | (0.08, 0.23) | (0.03, 0.14) | (-2.95, -1.95) | <0.001 |
|                   | 0.88           | 0.80           | -0.35          | <0.001 | 4.98             | 2.77             | -2.23         | <0.001 | 12.29          | 7.72           | -1.58          | <0.001 | 0.21         | 0.13         | -1.66          | <0.001 |

|               |        |        |         |        |          |          |         |        |         |         |         |        |        |        |         |        |
|---------------|--------|--------|---------|--------|----------|----------|---------|--------|---------|---------|---------|--------|--------|--------|---------|--------|
|               | (0.06, | (0.16, | (-0.43, |        | (2.00,   | (1.28,   | (-3.15, |        | (7.58,  | (5.17,  | (-2.00, |        | (0.00, | (0.00, | (-1.90, |        |
|               | 4.24)  | 2.43)  | -0.26)  |        | 10.32)   | 5.23)    | -1.30)  |        | 19.06)  | 11.14)  | -1.16)  |        | 3.12)  | 1.35)  | -1.41)  |        |
|               | 0.56   | 0.60   | 0.25    |        | 1.94     | 2.05     | 0.11    |        | 12.21   | 15.77   | 1.01    |        | 0.20   | 0.25   | 0.98    |        |
| Gambia        | (0.01, | (0.10, | (0.11,  | <0.001 | (0.33,   | (0.85,   | (-0.10, | 0.291  | (7.77,  | (12.45, | (0.18,  | 0.017  | (0.00, | (0.01, | (-0.30, | 0.134  |
|               | 3.76)  | 1.99)  | 0.39)   |        | 6.16)    | 4.12)    | 0.32)   |        | 18.62)  | 19.78)  | 1.84)   |        | 3.14)  | 1.42)  | 2.27)   |        |
|               | 8.53   | 10.83  | 0.82    |        | 65.90    | 83.60    | 0.84    |        | 6.41    | 15.51   | 3.19    |        | 0.10   | 0.25   | 3.29    |        |
| Georgia       | (6.90, | (8.42, | (0.73,  | <0.001 | (61.25,  | (76.83,  | (0.62,  | <0.001 | (5.00,  | (12.44, | (1.33,  | 0.001  | (0.00, | (0.02, | (1.84,  | <0.001 |
|               | 10.44) | 13.84) | 0.91)   |        | 70.83)   | 90.92)   | 1.05)   |        | 8.12)   | 19.20)  | 5.09)   |        | 0.57)  | 1.28)  | 4.76)   |        |
|               | 0.39   | 1.58   | 5.10    |        |          | 7.86     |         |        | 8.88    | 5.51    | -1.70   |        | 0.15   | 0.09   | -1.99   |        |
| Germany       | (0.29, | (1.37, | (4.84,  | <0.001 | —        | (7.41,   | —       | —      | (8.41,  | (5.10,  | (-2.30, | <0.001 | (0.10, | (0.05, | (-2.31, | <0.001 |
|               | 0.50)  | 1.82)  | 5.36)   |        |          | 8.33)    |         |        | 9.38)   | 5.94)   | -1.09)  |        | 0.23)  | 0.17)  | -1.67)  |        |
|               | 0.59   | 0.69   | 0.55    |        | 2.02     | 2.43     | 0.62    |        | 19.63   | 18.11   | -0.29   |        | 0.32   | 0.29   | -0.37   |        |
| Ghana         | (0.33, | (0.50, | (0.37,  | <0.001 | (1.47,   | (2.05,   | (0.04,  | 0.036  | (18.06, | (17.13, | (-0.49, | 0.003  | (0.15, | (0.18, | (-0.80, | 0.089  |
|               | 0.97)  | 0.92)  | 0.74)   |        | 2.70)    | 2.86)    | 1.21)   |        | 21.32)  | 19.13)  | -0.10)  |        | 0.62)  | 0.45)  | 0.06)   |        |
|               | 0.63   | 1.90   | 3.86    |        | 2.10     | 10.24    | 5.60    |        | 6.40    | 7.93    | 0.92    |        | 0.11   | 0.14   | 0.99    |        |
| Greece        | (0.32, | (1.27, | (3.66,  | <0.001 | (1.51,   | (8.85,   | (4.22,  | <0.001 | (5.31,  | (6.57,  | (0.32,  | 0.003  | (0.01, | (0.02, | (0.27,  | 0.007  |
|               | 1.11)  | 2.75)  | 4.05)   |        | 2.86)    | 11.83)   | 6.99)   |        | 7.65)   | 9.51)   | 1.52)   |        | 0.40)  | 0.54)  | 1.71)   |        |
|               | 34.85  | 32.98  | -0.19   |        | 280.02   | 261.08   | -0.24   |        | 23.19   | 14.43   | -1.59   |        | 0.40   | 0.24   | -1.74   |        |
| Greenland     | (9.84, | (7.74, | (-0.23, | <0.001 | (192.56, | (172.33, | (-0.34, | <0.001 | (4.29,  | (1.01,  | (-1.89, | <0.001 | (0.00, | (0.00, | (-1.91, | <0.001 |
|               | 97.40) | 96.37) | -0.16)  |        | 399.64)  | 383.09)  | -0.14)  |        | 81.40)  | 68.73)  | -1.28)  |        | 47.47) | 45.31) | -1.56)  |        |
|               | 1.00   | 1.19   | 0.59    |        | 5.49     | 6.15     | 0.38    |        | 8.83    | 7.10    | -0.81   |        | 0.15   | 0.12   | -0.59   |        |
| Grenada       | (0.00, | (0.00, | (0.50,  | <0.001 | (0.05,   | (0.19,   | (-0.02, | 0.065  | (0.53,  | (0.39,  | (-1.54, | 0.031  | (0.00, | (0.00, | (-1.22, | 0.062  |
|               | 29.97) | 24.34) | 0.68)   |        | 38.34)   | 33.40)   | 0.79)   |        | 43.05)  | 34.49)  | -0.07)  |        | 28.37) | 22.34) | 0.03)   |        |
|               | 3.96   | 4.19   | 0.18    |        | 28.51    | 29.30    | 0.10    |        | 22.26   | 53.74   | 3.00    |        | 0.36   | 0.88   | 3.01    |        |
| Guam          | (0.14, | (0.17, | (0.12,  | <0.001 | (12.30,  | (12.61,  | (0.02,  | 0.020  | (8.47,  | (30.20, | (1.43,  | <0.001 | (0.00, | (0.00, | (1.34,  | <0.001 |
|               | 21.05) | 21.70) | 0.24)   |        | 56.54)   | 58.12)   | 0.18)   |        | 47.92)  | 88.83)  | 4.59)   |        | 14.61) | 15.85) | 4.70)   |        |
|               | 0.58   | 0.74   | 0.84    |        | 1.86     | 2.05     | 0.36    |        | 8.34    | 5.21    | -1.90   |        | 0.14   | 0.09   | -1.92   |        |
| Guatemala     | (0.25, | (0.49, | (0.73,  | <0.001 | (1.17,   | (1.61,   | (-0.14, | 0.159  | (6.90,  | (4.52,  | (-2.38, | <0.001 | (0.02, | (0.02, | (-2.46, | <0.001 |
|               | 1.18)  | 1.07)  | 0.96)   |        | 2.82)    | 2.59)    | 0.85)   |        | 10.01)  | 5.97)   | -1.42)  |        | 0.55)  | 0.25)  | -1.37)  |        |
|               | 0.55   | 0.59   | 0.23    |        | 1.86     | 1.99     | 0.12    |        | 18.25   | 21.00   | 0.49    |        | 0.30   | 0.34   | 0.45    |        |
| Guinea        | (0.20, | (0.32, | (0.09,  | 0.002  | (1.09,   | (1.42,   | (-0.10, | 0.289  | (15.87, | (19.29, | (0.29,  | <0.001 | (0.07, | (0.15, | (0.09,  | 0.015  |
|               | 1.22)  | 1.01)  | 0.38)   |        | 2.96)    | 2.71)    | 0.34)   |        | 20.91)  | 22.85)  | 0.70)   |        | 0.86)  | 0.67)  | 0.82)   |        |
| Guinea-Bissau | 0.58   | 0.63   | 0.25    | 0.012  | 1.94     | 2.07     | -0.13   | 0.461  | 23.36   | 24.39   | 0.14    | 0.041  | 0.38   | 0.39   | 0.09    | 0.486  |

|                            |                |                |                |        |                  |                  |                |        |                |                |                |              |              |               |                |        |
|----------------------------|----------------|----------------|----------------|--------|------------------|------------------|----------------|--------|----------------|----------------|----------------|--------------|--------------|---------------|----------------|--------|
|                            | (0.02, 3.43)   | (0.10, 2.15)   | (0.05, 0.44)   |        | (0.39, 5.70)     | (0.82, 4.30)     | (-0.47, 0.22)  |        | (17.10, 31.37) | (19.88, 29.69) | (0.01, 0.28)   | (0.00, 3.06) | (0.03, 1.77) | (-0.15, 0.33) |                |        |
|                            | 1.05           | 1.21           | 0.43           |        | 5.79             | 6.11             | 0.09           |        | 38.73          | 28.87          | -1.14          | 0.64         | 0.48         | -1.14         |                |        |
| Guyana                     | (0.09, 4.60)   | (0.13, 4.74)   | (0.26, 0.60)   | <0.001 | (2.49, 11.49)    | (2.72, 11.80)    | (-0.15, 0.33)  | 0.450  | (29.82, 49.67) | (21.08, 38.71) | (-1.70, -0.58) | <0.001       | (0.02, 3.90) | (0.00, 3.52)  | (-1.70, -0.58) | <0.001 |
|                            | 0.93           | 0.86           | -0.30          |        | 5.08             | 2.56             | -3.06          |        | 29.68          | 24.45          | -0.61          |              | 0.49         | 0.40          | -0.66          |        |
| Haiti                      | (0.46, 1.68)   | (0.55, 1.29)   | (-0.40, -0.19) | <0.001 | (3.84, 6.60)     | (1.99, 3.25)     | (-3.91, -2.21) | <0.001 | (26.74, 32.87) | (22.64, 26.36) | (-1.07, -0.15) | 0.010        | (0.18, 1.08) | (0.20, 0.72)  | (-1.06, -0.25) | 0.001  |
|                            | 0.58           | 0.70           | 0.63           |        | 1.92             | 1.88             | -0.11          |        | 6.89           | 3.26           | -2.54          |              | 0.12         | 0.06          | -2.29          |        |
| Honduras                   | (0.17, 1.46)   | (0.38, 1.18)   | (0.53, 0.73)   | <0.001 | (1.02, 3.30)     | (1.31, 2.63)     | (-0.30, 0.07)  | 0.225  | (5.18, 9.01)   | (2.52, 4.15)   | (-3.18, -1.90) | <0.001       | (0.00, 0.76) | (0.00, 0.30)  | (-3.28, -1.29) | <0.001 |
|                            | 17.08          | 22.63          | 0.97           |        | 133.31           | 179.74           | 1.03           |        | 18.38          | 15.09          | -0.63          |              | 0.32         | 0.25          | -0.77          |        |
| Hungary                    | (15.27, 19.05) | (20.29, 25.19) | (0.94, 0.99)   | <0.001 | (128.33, 138.46) | (173.24, 186.45) | (0.94, 1.12)   | <0.001 | (16.51, 20.42) | (13.16, 17.26) | (-1.29, 0.03)  | 0.060        | (0.12, 0.71) | (0.07, 0.73)  | (-1.55, 0.02)  | 0.055  |
|                            | 0.38           | 1.83           | 5.68           |        |                  | 11.69            |                |        | 7.36           | 6.01           | -0.71          |              | 0.12         | 0.10          | -0.50          |        |
| Iceland                    | (0.00, 8.61)   | (0.06, 10.65)  | (5.29, 6.07)   | <0.001 | —                | (4.81, 24.62)    | —              | —      | (1.91, 19.73)  | (1.46, 17.04)  | (-0.90, -0.52) | <0.001       | (0.00, 8.11) | (0.00, 7.75)  | (-1.06, 0.06)  | 0.079  |
|                            | 0.40           | 0.52           | 0.88           |        |                  | 0.90             |                |        | 9.77           | 7.98           | -0.77          |              | 0.16         | 0.13          | -0.61          |        |
| India                      | (0.37, 0.43)   | (0.49, 0.55)   | (0.56, 1.20)   | <0.001 | —                | (0.87, 0.94)     | —              | —      | (9.62, 9.92)   | (7.88, 8.08)   | (-1.33, -0.21) | 0.007        | (0.14, 0.18) | (0.12, 0.15)  | (-1.67, 0.45)  | 0.257  |
|                            | 1.12           | 1.29           | 0.48           |        | 6.69             | 7.72             | 0.49           |        | 5.55           | 3.21           | -1.87          |              | 0.09         | 0.05          | -1.72          |        |
| Indonesia                  | (1.01, 1.23)   | (1.19, 1.39)   | (0.40, 0.56)   | <0.001 | (6.42, 6.98)     | (7.49, 7.95)     | (0.38, 0.61)   | <0.001 | (5.31, 5.79)   | (3.06, 3.36)   | (-1.93, -1.81) | <0.001       | (0.06, 0.13) | (0.04, 0.08)  | (-2.13, -1.32) | <0.001 |
|                            | 2.26           | 2.54           | 0.42           |        | 16.11            | 18.05            | 0.40           |        | 21.05          | 14.62          | -1.26          |              | 0.35         | 0.24          | -1.25          |        |
| Iran (Islamic Republic of) | (1.97, 2.59)   | (2.32, 2.78)   | (0.32, 0.52)   | <0.001 | (15.28, 16.98)   | (17.49, 18.63)   | (0.30, 0.50)   | <0.001 | (20.17, 21.96) | (14.05, 15.21) | (-1.43, -1.08) | <0.001       | (0.24, 0.49) | (0.17, 0.33)  | (-1.71, -0.79) | <0.001 |
|                            | 2.41           | 2.39           | -0.03          |        | 17.05            | 16.96            | -0.04          |        | 7.98           | 5.62           | -1.15          |              | 0.14         | 0.10          | -1.26          |        |
| Iraq                       | (1.87, 3.07)   | (2.07, 2.76)   | (-0.07, 0.02)  | 0.243  | (15.49, 18.73)   | (16.06, 17.90)   | (-0.20, 0.11)  | 0.576  | (6.95, 9.13)   | (5.11, 6.17)   | (-1.30, -1.00) | <0.001       | (0.04, 0.38) | (0.04, 0.20)  | (-1.48, -1.04) | <0.001 |
|                            | 0.61           | 2.37           | 4.78           |        | 2.02             | 15.31            | 7.27           |        | 6.70           | 3.97           | -1.77          |              | 0.11         | 0.07          | -1.61          |        |
| Ireland                    | (0.17, 1.56)   | (1.45, 3.68)   | (4.58, 4.98)   | <0.001 | (1.09, 3.43)     | (12.94, 18.04)   | (5.48, 9.09)   | <0.001 | (4.91, 8.96)   | (2.75, 5.59)   | (-3.21, -0.30) | 0.018        | (0.00, 0.78) | (0.00, 0.65)  | (-3.23, 0.04)  | 0.055  |
|                            | 0.63           | 0.92           | 1.29           | <0.001 | 2.25             | 2.10             | -0.40          | 0.001  | 7.08           | 3.56           | -2.45          | <0.001       | 0.12         | 0.06          | -2.47          | <0.001 |

|                                        |                         |                         |                         |        |                         |                         |                         |        |                         |                         |                         |                 |                         |                         |                         |        |
|----------------------------------------|-------------------------|-------------------------|-------------------------|--------|-------------------------|-------------------------|-------------------------|--------|-------------------------|-------------------------|-------------------------|-----------------|-------------------------|-------------------------|-------------------------|--------|
|                                        | (0.23,<br>1.39)         | (0.51,<br>1.53)         | (1.08,<br>1.50)         |        | (1.41,<br>3.41)         | (1.47,<br>2.92)         | (-0.64,<br>-0.16)       |        | (5.49,<br>8.98)         | (2.70,<br>4.61)         | (-3.14,<br>-1.75)       | (0.00,<br>0.63) | (0.00,<br>0.35)         | (-3.38,<br>-1.55)       |                         |        |
|                                        | 55.48                   | 57.90                   | 0.17                    |        | 444.40                  | 467.30                  | 0.19                    |        | 9.20                    | 6.94                    | -0.98                   | 0.15            | 0.11                    | -1.18                   |                         |        |
| Italy                                  | (54.08,<br>56.92)       | (56.28,<br>59.55)       | (0.02,<br>0.31)         | 0.022  | (440.40,<br>448.42)     | (462.83,<br>471.81)     | (0.08,<br>0.31)         | 0.001  | (8.63,<br>9.79)         | (6.38,<br>7.54)         | (-1.39,<br>-0.58)       | <0.001          | (0.09,<br>0.24)         | (0.05,<br>0.22)         | (-1.55,<br>-0.82)       | <0.001 |
|                                        | 0.95                    | 1.12                    | 0.56                    |        | 5.07                    | 5.57                    | 0.31                    |        | 6.48                    | 8.19                    | 0.97                    | 0.10            | 0.13                    | 0.99                    |                         |        |
| Jamaica                                | (0.27,<br>2.48)         | (0.44,<br>2.36)         | (0.48,<br>0.64)         | <0.001 | (3.09,<br>7.88)         | (3.82,<br>7.86)         | (0.03,<br>0.58)         | 0.028  | (4.47,<br>9.20)         | (6.06,<br>10.85)        | (-0.62,<br>2.59)        | 0.233           | (0.00,<br>1.18)         | (0.00,<br>0.91)         | (-0.77,<br>2.77)        | 0.272  |
|                                        | 57.52                   | 60.12                   | 0.16                    |        | 463.92                  | 488.69                  | 0.18                    |        | 6.67                    | 3.30                    | -2.44                   | 0.11            | 0.05                    | -2.64                   |                         |        |
| Japan                                  | (56.53,<br>58.53)       | (58.97,<br>61.29)       | (0.14,<br>0.17)         | <0.001 | (461.11,<br>466.73)     | (485.48,<br>491.92)     | (0.16,<br>0.20)         | <0.001 | (6.34,<br>7.02)         | (3.03,<br>3.59)         | (-2.81,<br>-2.07)       | <0.001          | (0.07,<br>0.16)         | (0.02,<br>0.10)         | (-3.97,<br>-1.29)       | <0.001 |
|                                        | 2.38                    | 2.59                    | 0.33                    |        | 17.05                   | 17.97                   | 0.18                    |        | 13.23                   | 5.89                    | -2.70                   | 0.23            | 0.10                    | -2.78                   |                         |        |
| Jordan                                 | (1.27,<br>4.12)         | (1.96,<br>3.37)         | (0.22,<br>0.43)         | <0.001 | (13.62,<br>21.12)       | (16.19,<br>19.89)       | (-0.00,<br>0.36)        | 0.051  | (10.45,<br>16.59)       | (4.92,<br>7.01)         | (-3.63,<br>-1.76)       | <0.001          | (0.01,<br>1.19)         | (0.01,<br>0.36)         | (-3.62,<br>-1.93)       | <0.001 |
|                                        | 8.43                    | 10.01                   | 0.59                    |        | 66.21                   | 77.50                   | 0.53                    |        | 2.98                    | 3.25                    | 0.20                    | 0.05            | 0.05                    | -0.06                   |                         |        |
| Kazakhstan                             | (7.49,<br>9.47)         | (9.02,<br>11.09)        | (0.55,<br>0.63)         | <0.001 | (63.51,<br>69.00)       | (74.75,<br>80.34)       | (0.37,<br>0.69)         | <0.001 | (2.43,<br>3.63)         | (2.67,<br>3.92)         | (-0.15,<br>0.56)        | 0.264           | (0.00,<br>0.20)         | (0.01,<br>0.22)         | (-0.87,<br>0.76)        | 0.891  |
|                                        | 0.58                    | 0.57                    | -0.07                   |        | 1.93                    | 1.90                    | -0.06                   |        | 11.95                   | 9.35                    | -0.86                   | 0.20            | 0.16                    | -0.78                   |                         |        |
| Kenya                                  | (0.36,<br>0.90)         | (0.43,<br>0.74)         | (-0.20,<br>0.06)        | 0.302  | (1.45,<br>2.52)         | (1.62,<br>2.22)         | (-0.28,<br>0.17)        | 0.626  | (10.90,<br>13.09)       | (8.77,<br>9.96)         | (-1.04,<br>-0.68)       | <0.001          | (0.08,<br>0.42)         | (0.09,<br>0.26)         | (-0.87,<br>-0.70)       | <0.001 |
|                                        | 3.55                    | 3.21                    | -0.39                   |        | 24.75                   | 22.52                   | -0.39                   |        | 28.75                   | 30.17                   | 0.13                    | 0.48            | 0.50                    | 0.16                    |                         |        |
| Kiribati                               | (0.00,<br>35.93)        | (0.03,<br>22.09)        | (-0.52,<br>-0.26)       | <0.001 | (5.76,<br>69.85)        | (7.66,<br>51.49)        | (-0.62,<br>-0.16)       | 0.001  | (8.41,<br>73.92)        | (12.53,<br>61.48)       | (0.03,<br>0.24)         | 0.015           | (0.00,<br>30.38)        | (0.00,<br>17.10)        | (-0.00,<br>0.33)        | 0.056  |
|                                        | 3.45                    | 4.33                    | 0.80                    |        | 23.33                   | 30.05                   | 0.88                    |        | 5.21                    | 5.31                    | 0.48                    | 0.09            | 0.09                    | 0.55                    |                         |        |
| Kuwait                                 | (1.81,<br>6.06)         | (3.19,<br>5.89)         | (0.73,<br>0.86)         | <0.001 | (18.53,<br>29.04)       | (27.22,<br>33.25)       | (0.49,<br>1.27)         | <0.001 | (3.08,<br>8.30)         | (3.91,<br>7.16)         | (-0.36,<br>1.33)        | 0.266           | (0.00,<br>1.36)         | (0.00,<br>0.83)         | (-0.38,<br>1.49)        | 0.248  |
|                                        | 7.49                    | 7.18                    | -0.15                   |        | 58.51                   | 55.41                   | -0.22                   |        | 7.80                    | 3.39                    | -2.98                   | 0.13            | 0.06                    | -3.56                   |                         |        |
| Kyrgyzstan                             | (5.77,<br>9.59)         | (5.81,<br>8.80)         | (-0.20,<br>-0.10)       | <0.001 | (53.40,<br>63.99)       | (51.43,<br>59.62)       | (-0.35,<br>-0.09)       | 0.001  | (6.07,<br>9.90)         | (2.46,<br>4.56)         | (-3.98,<br>-1.97)       | <0.001          | (0.00,<br>0.72)         | (0.00,<br>0.41)         | (-4.21,<br>-2.90)       | <0.001 |
| Lao People's<br>Democratic<br>Republic | 1.00<br>(0.40,<br>2.10) | 1.21<br>(0.72,<br>1.92) | 0.65<br>(0.53,<br>0.78) | <0.001 | 6.06<br>(4.30,<br>8.31) | 7.16<br>(5.83,<br>8.69) | 0.53<br>(0.37,<br>0.69) | <0.001 | 3.21<br>(2.05,<br>4.84) | 3.48<br>(2.61,<br>4.56) | 0.29<br>(0.10,<br>0.48) | 0.003           | 0.05<br>(0.00,<br>0.71) | 0.06<br>(0.00,<br>0.38) | 0.75<br>(0.50,<br>1.00) | <0.001 |
| Latvia                                 | 13.86                   | 15.98                   | 0.57                    | <0.001 | 108.75                  | 126.65                  | 0.61                    | <0.001 | 2.35                    | 2.35                    | -0.04                   | 0.949           | 0.04                    | 0.04                    | -0.14                   | 0.909  |

|            |         |         |         |        |          |          |         |        |         |         |         |        |        |         |         |        |
|------------|---------|---------|---------|--------|----------|----------|---------|--------|---------|---------|---------|--------|--------|---------|---------|--------|
|            | (10.78, | (11.77, | (0.40,  |        | (99.90,  | (114.72, | (0.37,  |        | (1.18,  | (0.89,  | (-1.16, | (0.00, | (0.00, | (-2.53, |         |        |
|            | 17.59)  | 21.44)  | 0.75)   |        | 118.23)  | 139.71)  | 0.84)   |        | 4.25)   | 5.31)   | 1.10)   | 0.98)  | 1.94)  | 2.31)   |         |        |
|            | 2.46    | 2.69    | 0.36    |        | 17.50    | 19.15    | 0.34    |        | 30.09   | 18.06   | -1.74   | 0.51   | 0.31   | -1.79   |         |        |
| Lebanon    | (1.34,  | (1.80,  | (0.23,  | <0.001 | (14.16,  | (16.76,  | (0.20,  | <0.001 | (25.79, | (15.55, | (-1.82, | <0.001 | (0.10, | (0.07,  | (-1.96, | <0.001 |
|            | 4.15)   | 3.91)   | 0.48)   |        | 21.40)   | 21.86)   | 0.48)   |        | 34.93)  | 20.90)  | -1.66)  | 1.55)  | 0.96)  | -1.62)  |         |        |
|            | 0.63    | 0.84    | 0.98    |        | 2.08     | 2.75     | 1.11    |        | 12.10   | 14.52   | 0.60    | 0.20   | 0.24   | 0.48    |         |        |
| Lesotho    | (0.07,  | (0.21,  | (0.81,  | <0.001 | (0.70,   | (1.38,   | (0.86,  | <0.001 | (8.62,  | (11.23, | (0.14,  | 0.011  | (0.00, | (0.01,  | (0.08,  | 0.019  |
|            | 2.51)   | 2.26)   | 1.16)   |        | 4.76)    | 4.91)    | 1.35)   |        | 16.63)  | 18.51)  | 1.06)   | 1.81)  | 1.34)  | 0.88)   |         |        |
|            | 0.54    | 0.51    | -0.22   |        | 1.85     |          |         |        | 17.15   | 18.31   | 0.20    | 0.27   | 0.29   | 0.19    |         |        |
| Liberia    | (0.05,  | (0.16,  | (-0.41, | 0.024  | (0.67,   | —        | —       | —      | (13.17, | (15.80, | (0.00,  | 0.047  | (0.01, | (0.06,  | (-0.34, | 0.489  |
|            | 2.10)   | 1.23)   | -0.03)  |        | 4.05)    |          |         |        | 22.01)  | 21.14)  | 0.39)   | 1.65)  | 0.90)  | 0.72)   |         |        |
|            | 2.68    | 2.53    | -0.20   |        | 19.14    | 18.13    | -0.21   |        | 28.61   | 23.83   | -0.60   | 0.48   | 0.40   | -0.58   |         |        |
| Libya      | (1.53,  | (1.79,  | (-0.24, | <0.001 | (15.64,  | (16.09,  | (-0.39, | 0.016  | (24.68, | (21.40, | (-0.97, | 0.002  | (0.10, | (0.14,  | (-0.95, | 0.003  |
|            | 4.40)   | 3.48)   | -0.17)  |        | 23.22)   | 20.37)   | -0.04)  |        | 33.06)  | 26.47)  | -0.22)  | 1.49)  | 0.89)  | -0.20)  |         |        |
|            | 22.43   | 25.35   | 0.49    |        | 177.40   | 200.31   | 0.46    |        | 2.50    | 4.00    | 1.84    | 0.04   | 0.06   | 1.59    |         |        |
| Lithuania  | (19.08, | (20.86, | (0.18,  | 0.002  | (167.79, | (187.50, | (0.17,  | 0.002  | (1.47,  | (2.31,  | (0.33,  | 0.017  | (0.00, | (0.00,  | (0.61,  | 0.001  |
|            | 26.22)  | 30.65)  | 0.81)   |        | 187.44)  | 213.88)  | 0.75)   |        | 4.02)   | 6.57)   | 3.38)   | 0.67)  | 1.31)  | 2.58)   |         |        |
|            | 1.16    | 3.87    | 4.34    |        | 6.42     | 27.53    | 5.24    |        | 9.85    | 7.34    | -0.95   | 0.17   | 0.12   | -1.12   |         |        |
| Luxembourg | (0.02,  | (1.15,  | (4.17,  | <0.001 | (2.17,   | (19.16,  | (4.30,  | <0.001 | (4.03,  | (3.12,  | (-1.29, | <0.001 | (0.00, | (0.00,  | (-1.45, | <0.001 |
|            | 9.25)   | 10.53)  | 4.50)   |        | 16.45)   | 39.13)   | 6.18)   |        | 21.41)  | 15.35)  | -0.60)  | 7.77)  | 5.14)  | -0.79)  |         |        |
|            | 0.91    | 0.72    | -0.85   |        | 5.10     | 2.39     | -2.59   |        | 51.77   | 28.73   | -2.05   | 0.86   | 0.48   | -2.06   |         |        |
| Madagascar | (0.54,  | (0.50,  | (-1.08, | <0.001 | (4.09,   | (1.95,   | (-3.55, | <0.001 | (48.76, | (27.29, | (-2.30, | <0.001 | (0.51, | (0.31,  | (-2.42, | <0.001 |
|            | 1.46)   | 1.00)   | -0.62)  |        | 6.28)    | 2.91)    | -1.62)  |        | 54.92)  | 30.22)  | -1.80)  | 1.38)  | 0.71)  | -1.70)  |         |        |
|            | 0.46    | 0.43    | -0.24   |        |          |          |         |        | 16.49   | 9.14    | -2.01   | 0.27   | 0.15   | -1.96   |         |        |
| Malawi     | (0.19,  | (0.24,  | (-0.34, | <0.001 | —        | —        | —       | —      | (14.63, | (8.19,  | (-2.31, | <0.001 | (0.08, | (0.05,  | (-2.24, | <0.001 |
|            | 0.96)   | 0.72)   | -0.13)  |        |          |          |         |        | 18.54)  | 10.17)  | -1.71)  | 0.70)  | 0.35)  | -1.67)  |         |        |
|            | 1.50    | 1.76    | 0.55    |        | 9.28     | 13.03    | 1.41    |        | 4.78    | 5.25    | 0.42    | 0.08   | 0.09   | 0.40    |         |        |
| Malaysia   | (1.12,  | (1.46,  | (0.50,  | <0.001 | (8.27,   | (12.17,  | (1.08,  | <0.001 | (4.09,  | (4.71,  | (0.15,  | 0.002  | (0.02, | (0.03,  | (-0.08, | 0.104  |
|            | 1.97)   | 2.12)   | 0.60)   |        | 10.38)   | 13.94)   | 1.74)   |        | 5.55)   | 5.83)   | 0.68)   | 0.25)  | 0.20)  | 0.89)   |         |        |
|            | 1.38    | 1.57    | 0.43    |        | 8.30     | 11.31    | 0.78    |        | 10.14   | 5.59    | -1.99   | 0.17   | 0.10   | -1.88   |         |        |
| Maldives   | (0.00,  | (0.11,  | (0.37,  | <0.001 | (1.16,   | (5.79,   | (0.39,  | <0.001 | (2.43,  | (1.84,  | (-2.45, | <0.001 | (0.00, | (0.00,  | (-2.44, | <0.001 |
|            | 17.77)  | 8.17)   | 0.49)   |        | 29.48)   | 20.98)   | 1.18)   |        | 30.60)  | 13.96)  | -1.53)  | 15.76) | 5.95)  | -1.32)  |         |        |
| Mali       | 0.58    | 0.62    | 0.20    | 0.037  | 1.96     | 2.09     | -0.25   | 0.134  | 28.40   | 25.59   | -0.30   | <0.001 | 0.46   | 0.41    | -0.36   | <0.001 |



|                                        |                   |                   |                  |        |                    |                     |                  |        |                   |                   |                   |        |                   |                  |                   |        |
|----------------------------------------|-------------------|-------------------|------------------|--------|--------------------|---------------------|------------------|--------|-------------------|-------------------|-------------------|--------|-------------------|------------------|-------------------|--------|
|                                        | (0.25,<br>1.15)   | (0.39,<br>0.95)   | (0.01,<br>0.39)  |        | (1.25,<br>2.92)    | (1.60,<br>2.68)     | (-0.56,<br>0.08) |        | (25.81,<br>31.19) | (24.08,<br>27.18) | (-0.44,<br>-0.16) |        | (0.19,<br>0.98)   | (0.24,<br>0.68)  | (-0.49,<br>-0.24) |        |
|                                        | 0.35              | 1.19              | 4.49             |        |                    | 5.40                |                  |        | 3.85              | 4.31              | 0.38              |        | 0.06              | 0.07             | 0.41              |        |
| Malta                                  | (0.00,<br>7.10)   | (0.02,<br>9.76)   | (4.04,<br>4.94)  | <0.001 | —                  | (1.60,<br>15.43)    | —                | —      | (0.69,<br>12.71)  | (0.84,<br>14.48)  | (-0.05,<br>0.80)  | 0.081  | (0.00,<br>6.61)   | (0.00,<br>8.09)  | (-0.72,<br>1.54)  | 0.481  |
|                                        | 2.97              | 3.07              | 0.08             |        | 21.02              | 22.13               | 0.10             |        | 21.68             | 29.01             | 1.00              |        | 0.36              | 0.48             | 0.99              |        |
| Marshall Islands                       | (0.00,<br>62.37)  | (0.00,<br>39.50)  | (-0.09,<br>0.25) | 0.379  | (1.44,<br>94.02)   | (3.71,<br>71.25)    | (-0.18,<br>0.38) | 0.487  | (1.98,<br>92.95)  | (6.65,<br>81.51)  | (0.94,<br>1.06)   | <0.001 | (0.00,<br>57.51)  | (0.00,<br>34.44) | (0.80,<br>1.18)   | <0.001 |
|                                        | 0.67              | 0.67              | -0.03            |        | 2.24               | 2.23                | -0.01            |        | 17.49             | 14.13             | -0.69             |        | 0.28              | 0.23             | -0.69             |        |
| Mauritania                             | (0.10,<br>2.30)   | (0.22,<br>1.62)   | (-0.17,<br>0.11) | 0.690  | (0.90,<br>4.63)    | (1.23,<br>3.73)     | (-0.32,<br>0.30) | 0.931  | (13.62,<br>22.21) | (11.71,<br>16.96) | (-1.02,<br>-0.35) | <0.001 | (0.01,<br>1.66)   | (0.02,<br>0.94)  | (-0.89,<br>-0.48) | <0.001 |
|                                        | 1.50              | 1.75              | 0.53             |        | 8.92               | 12.56               | 1.34             |        | 21.44             | 19.99             | 0.17              |        | 0.35              | 0.34             | 0.28              |        |
| Mauritius                              | (0.38,<br>4.04)   | (0.50,<br>4.52)   | (0.44,<br>0.62)  | <0.001 | (5.53,<br>13.64)   | (8.52,<br>17.95)    | (1.05,<br>1.64)  | <0.001 | (16.01,<br>28.14) | (14.67,<br>26.67) | (-1.64,<br>2.01)  | 0.854  | (0.01,<br>2.27)   | (0.00,<br>2.36)  | (-1.47,<br>2.06)  | 0.755  |
|                                        | 0.86              | 1.15              | 1.02             |        | 2.73               | 3.06                | 0.41             |        | 7.94              | 5.51              | -1.10             |        | 0.13              | 0.09             | -1.15             |        |
| Mexico                                 | (0.72,<br>1.02)   | (1.02,<br>1.29)   | (0.91,<br>1.14)  | <0.001 | (2.46,<br>3.02)    | (2.85,<br>3.29)     | (0.04,<br>0.79)  | 0.032  | (7.52,<br>8.39)   | (5.22,<br>5.80)   | (-1.54,<br>-0.66) | <0.001 | (0.08,<br>0.21)   | (0.06,<br>0.14)  | (-1.56,<br>-0.74) | <0.001 |
| Micronesia<br>(Federated States<br>of) | 3.01<br>29.94)    | 2.81<br>27.03)    | -0.27<br>-0.16)  | <0.001 | 21.21<br>59.04)    | 19.96<br>54.59)     | -0.23<br>0.09)   | 0.154  | 23.88<br>61.14)   | 28.10<br>64.59)   | 0.56<br>0.59)     | <0.001 | 0.40<br>25.19)    | 0.46<br>22.66)   | 0.53<br>0.72)     | <0.001 |
|                                        | 0.89              | 5.61              | 6.59             |        | 2.74               | 41.58               | 9.91             |        | 4.68              | 3.77              | -0.73             |        | 0.08              | 0.06             | -1.07             |        |
| Monaco                                 | (0.00,<br>127.20) | (0.00,<br>101.12) | (6.16,<br>7.02)  | <0.001 | (0.00,<br>129.61)  | (5.81,<br>157.08)   | (7.40,<br>12.47) | <0.001 | (0.00,<br>133.14) | (0.00,<br>98.24)  | (-0.80,<br>-0.66) | <0.001 | (0.00,<br>126.04) | (0.00,<br>91.25) | (-1.57,<br>-0.57) | <0.001 |
|                                        | 7.42              | 8.49              | 0.46             |        | 58.99              | 66.47               | 0.42             |        | 7.62              | 5.41              | -1.10             |        | 0.12              | 0.09             | -1.10             |        |
| Mongolia                               | (4.92,<br>10.87)  | (6.51,<br>10.98)  | (0.44,<br>0.48)  | <0.001 | (51.18,<br>67.74)  | (60.81,<br>72.60)   | (0.37,<br>0.47)  | <0.001 | (5.24,<br>10.88)  | (3.76,<br>7.62)   | (-1.54,<br>-0.67) | <0.001 | (0.00,<br>1.48)   | (0.00,<br>0.90)  | (-1.76,<br>-0.44) | 0.001  |
|                                        | 14.61             | 18.77             | 0.88             |        | 113.97             | 148.86              | 0.95             |        | 3.37              | 3.26              | 0.04              |        | 0.05              | 0.05             | 0.17              |        |
| Montenegro                             | (8.65,<br>23.17)  | (11.53,<br>29.18) | (0.84,<br>0.91)  | <0.001 | (95.92,<br>134.48) | (127.24,<br>173.37) | (0.90,<br>1.00)  | <0.001 | (0.94,<br>8.59)   | (0.79,<br>9.29)   | (-0.83,<br>0.91)  | 0.938  | (0.00,<br>3.25)   | (0.00,<br>4.23)  | (-1.12,<br>1.47)  | 0.799  |
|                                        | 1.96              | 2.20              | 0.41             |        | 13.83              | 15.65               | 0.41             |        | 21.82             | 16.85             | -0.85             |        | 0.37              | 0.28             | -0.92             |        |
| Morocco                                | (1.58,<br>2.41)   | (1.87,<br>2.57)   | (0.33,<br>0.49)  | <0.001 | (12.75,<br>14.97)  | (14.76,<br>16.57)   | (0.17,<br>0.66)  | 0.001  | (20.53,<br>23.17) | (15.93,<br>17.82) | (-1.07,<br>-0.64) | <0.001 | (0.22,<br>0.59)   | (0.18,<br>0.44)  | (-1.14,<br>-0.70) | <0.001 |
| Mozambique                             | 0.44              | 0.49              | 0.37             | 0.012  | —                  | —                   | —                | —      | 11.45             | 9.24              | -0.74             | <0.001 | 0.19              | 0.15             | -0.76             | 0.004  |

|             |                 |                 |                |        |                 |                  |                |                |                 |                 |                |              |                 |                 |                |
|-------------|-----------------|-----------------|----------------|--------|-----------------|------------------|----------------|----------------|-----------------|-----------------|----------------|--------------|-----------------|-----------------|----------------|
|             | (0.21, 0.81)    | (0.32, 0.74)    | (0.08, 0.66)   |        |                 |                  |                | (10.12, 12.90) | (8.44, 10.09)   | (-0.92, -0.57)  |                | (0.06, 0.48) | (0.07, 0.31)    | (-1.28, -0.25)  |                |
|             | 0.82            | 1.13            | 1.13           |        | 2.98            | 6.90             | 1.49           | 6.79           | 3.66            | -2.14           |                | 0.11         | 0.06            | -2.16           |                |
| Myanmar     | (0.63, 1.05)    | (0.95, 1.35)    | (1.06, 1.20)   | <0.001 | (2.59, 3.41)    | (6.42, 7.40)     | (1.24, 1.73)   | <0.001         | (6.24, 7.38)    | (3.31, 4.02)    | (-2.27, -2.02) | <0.001       | (0.05, 0.22)    | (0.02, 0.13)    | (-2.69, -1.63) |
|             | 0.99            | 0.93            | -0.22          |        | 5.49            | 5.30             | -0.13          |                | 15.62           | 10.82           | -1.27          |              | 0.26            | 0.18            | -1.24          |
| Namibia     | (0.16, 3.45)    | (0.28, 2.29)    | (-0.31, -0.12) | <0.001 | (2.80, 9.72)    | (3.41, 7.87)     | (-0.42, 0.16)  | 0.385          | (11.17, 21.41)  | (8.15, 14.12)   | (-1.74, -0.79) | <0.001       | (0.00, 2.30)    | (0.00, 1.15)    | (-1.81, -0.67) |
|             | 3.19            | 2.87            | -0.40          |        | 22.90           | 20.69            | -0.34          |                | 33.70           | 37.01           | 0.32           |              | 0.56            | 0.61            | 0.28           |
| Nauru       | (0.00, 213.49)  | (0.00, 191.52)  | (-0.51, -0.29) | <0.001 | (0.01, 251.64)  | (0.01, 225.89)   | (-0.48, -0.20) | <0.001         | (0.18, 268.68)  | (0.47, 252.56)  | (0.24, 0.40)   | <0.001       | (0.00, 208.26)  | (0.00, 187.05)  | (0.19, 0.37)   |
|             | 0.34            | 0.39            | 0.49           |        |                 |                  |                |                | 6.87            | 5.03            | -1.08          |              | 0.12            | 0.09            | -1.05          |
| Nepal       | (0.17, 0.60)    | (0.25, 0.57)    | (0.15, 0.82)   | 0.005  | —               | —                | —              | —              | (6.03, 7.80)    | (4.51, 5.59)    | (-1.29, -0.87) | <0.001       | (0.03, 0.31)    | (0.03, 0.19)    | (-1.47, -0.64) |
|             | 0.73            | 0.95            | 0.90           |        | 2.55            | 2.39             | -0.34          |                | 6.49            | 4.24            | -1.40          |              | 0.11            | 0.07            | -1.64          |
| Netherlands | (0.46, 1.11)    | (0.62, 1.40)    | (0.71, 1.09)   | <0.001 | (2.02, 3.19)    | (1.85, 3.04)     | (-0.73, 0.04)  | 0.081          | (5.62, 7.47)    | (3.50, 5.10)    | (-1.91, -0.89) | <0.001       | (0.03, 0.32)    | (0.01, 0.28)    | (-2.31, -0.97) |
|             | 11.93           | 13.71           | 0.50           |        | 91.90           | 107.54           | 0.56           |                | 9.07            | 6.73            | -0.87          |              | 0.15            | 0.11            | -0.87          |
| New Zealand | (9.51, 14.78)   | (11.17, 16.67)  | (0.44, 0.55)   | <0.001 | (84.96, 99.27)  | (100.26, 115.22) | (0.37, 0.76)   | <0.001         | (6.98, 11.61)   | (4.98, 8.91)    | (-2.61, 0.90)  | 0.333        | (0.00, 0.83)    | (0.00, 0.77)    | (-2.82, 1.12)  |
|             | 0.71            | 0.90            | 0.83           |        | 2.26            | 2.40             | 0.21           |                | 7.18            | 4.31            | -1.79          |              | 0.13            | 0.08            | -1.60          |
| Nicaragua   | (0.22, 1.77)    | (0.47, 1.56)    | (0.74, 0.93)   | <0.001 | (1.18, 3.92)    | (1.63, 3.40)     | (0.02, 0.40)   | 0.034          | (5.27, 9.61)    | (3.28, 5.57)    | (-2.68, -0.90) | <0.001       | (0.00, 0.90)    | (0.00, 0.42)    | (-2.04, -1.16) |
|             | 0.52            | 0.50            | -0.15          |        |                 |                  |                |                | 16.57           | 16.58           | -0.04          |              | 0.27            | 0.27            | -0.02          |
| Niger       | (0.20, 1.14)    | (0.29, 0.82)    | (-0.25, -0.05) | 0.004  | —               | —                | —              | —              | (14.51, 18.87)  | (15.34, 17.89)  | (-0.35, 0.28)  | 0.812        | (0.07, 0.78)    | (0.13, 0.50)    | (-0.29, 0.26)  |
|             | 0.61            | 0.66            | 0.22           |        | 2.08            | 2.25             | 0.25           |                | 17.16           | 12.86           | -1.04          |              | 0.28            | 0.21            | -1.02          |
| Nigeria     | (0.49, 0.76)    | (0.58, 0.74)    | (0.08, 0.35)   | 0.002  | (1.83, 2.36)    | (2.09, 2.42)     | (0.17, 0.34)   | <0.001         | (16.53, 17.80)  | (12.53, 13.20)  | (-1.21, -0.87) | <0.001       | (0.20, 0.38)    | (0.17, 0.26)    | (-1.29, -0.75) |
|             | 2.89            | 3.02            | 0.16           |        | 20.98           | 21.76            | 0.11           |                | 20.51           | 18.63           | -0.33          |              | 0.34            | 0.31            | -0.32          |
| Niue        | (0.00, 1045.72) | (0.00, 1467.49) | (0.11, 0.20)   | <0.001 | (0.00, 1083.22) | (0.00, 1504.48)  | (-0.00, 0.21)  | 0.054          | (0.00, 1080.71) | (0.00, 1498.60) | (-0.47, -0.18) | <0.001       | (0.00, 1040.45) | (0.00, 1462.09) | (-0.48, -0.16) |

|                  |         |         |         |        |          |          |         |        |         |         |         |        |         |         |         |        |
|------------------|---------|---------|---------|--------|----------|----------|---------|--------|---------|---------|---------|--------|---------|---------|---------|--------|
|                  | 13.53   | 16.85   | 0.76    |        | 103.60   | 131.59   | 0.82    |        | 7.36    | 4.51    | -1.79   |        | 0.12    | 0.07    | -1.92   |        |
| North Macedonia  | (10.17, | (13.08, | (0.71,  | <0.001 | (93.91,  | (120.94, | (0.63,  | <0.001 | (4.94,  | (2.66,  | (-2.55, | <0.001 | (0.00,  | (0.00,  | (-2.93, | <0.001 |
|                  | 17.66)  | 21.54)  | 0.82)   |        | 114.05)  | 143.08)  | 1.02)   |        | 10.56)  | 7.34)   | -1.02)  |        | 1.20)   | 1.49)   | -0.89)  |        |
| Northern Mariana | 3.82    | 3.58    | -0.23   |        | 27.03    | 24.45    | -0.34   |        | 43.73   | 56.04   | 1.02    |        | 0.72    | 0.94    | 1.06    |        |
| Islands          | (0.00,  | (0.00,  | (-0.27, | <0.001 | (5.80,   | (0.64,   | (-0.47, | <0.001 | (14.66, | (10.83, | (0.57,  | <0.001 | (0.00,  | (0.00,  | (0.53,  | <0.001 |
|                  | 43.86)  | 104.93) | -0.18)  |        | 80.63)   | 142.44)  | -0.21)  |        | 103.61) | 185.11) | 1.48)   |        | 38.33)  | 100.28) | 1.60)   |        |
| Norway           | 25.42   | 27.00   | 0.19    |        | 201.92   | 213.19   | 0.17    |        | 5.12    | 2.39    | -2.64   |        | 0.09    | 0.04    | -2.73   |        |
|                  | (22.05, | (23.71, | (0.17,  | <0.001 | (192.27, | (203.90, | (0.13,  | <0.001 | (3.67,  | (1.49,  | (-3.14, | <0.001 | (0.00,  | (0.00,  | (-3.77, | <0.001 |
|                  | 29.18)  | 30.65)  | 0.22)   |        | 211.96)  | 222.82)  | 0.20)   |        | 6.97)   | 3.69)   | -2.13)  |        | 0.68)   | 0.59)   | -1.69)  |        |
| Oman             | 2.90    | 2.98    | 0.09    |        | 20.88    | 20.99    | 0.01    |        | 27.92   | 21.36   | -0.86   |        | 0.48    | 0.37    | -0.90   |        |
|                  | (1.23,  | (1.93,  | (0.02,  | 0.009  | (15.66,  | (18.06,  | (-0.18, | 0.961  | (21.95, | (18.32, | (-1.21, | <0.001 | (0.02,  | (0.08,  | (-1.45, | 0.002  |
|                  | 5.88)   | 4.49)   | 0.15)   |        | 27.33)   | 24.32)   | 0.19)   |        | 35.07)  | 24.83)  | -0.51)  |        | 2.42)   | 1.19)   | -0.34)  |        |
| Pakistan         | 0.46    | 0.50    | 0.26    |        | —        | —        | —       | —      | 9.43    | 12.18   | 0.89    |        | 0.16    | 0.20    | 0.86    |        |
|                  | (0.37,  | (0.43,  | (0.07,  | 0.008  | —        | —        | —       | —      | (8.98,  | (11.86, | (0.74,  | <0.001 | (0.10,  | (0.16,  | (0.62,  | <0.001 |
|                  | 0.58)   | 0.58)   | 0.45)   |        |          |          |         |        | 9.89)   | 12.52)  | 1.04)   |        | 0.23)   | 0.25)   | 1.11)   |        |
| Palau            | 2.77    | 2.86    | 0.13    |        | 20.13    | 20.65    | 0.07    |        | 2.89    | 2.64    | -0.32   |        | 0.05    | 0.04    | -0.98   |        |
|                  | (0.00,  | (0.00,  | (0.08,  | <0.001 | (0.08,   | (0.04,   | (-0.12, | 0.476  | (0.00,  | (0.00,  | (-0.41, | <0.001 | (0.00,  | (0.00,  | (-1.30, | <0.001 |
|                  | 126.30) | 175.49) | 0.17)   |        | 159.07)  | 205.89)  | 0.26)   |        | 126.50) | 175.06) | -0.22)  |        | 120.91) | 170.29) | -0.66)  |        |
| Palestine        | 2.22    | 2.47    | 0.40    |        | 15.80    | 17.67    | 0.39    |        | 6.45    | 5.43    | -0.58   |        | 0.11    | 0.09    | -0.66   |        |
|                  | (0.87,  | (1.56,  | (0.28,  | <0.001 | (11.43,  | (14.96,  | (0.18,  | <0.001 | (3.98,  | (4.07,  | (-0.77, | <0.001 | (0.00,  | (0.00,  | (-0.99, | <0.001 |
|                  | 4.80)   | 3.74)   | 0.51)   |        | 21.34)   | 20.73)   | 0.60)   |        | 10.04)  | 7.14)   | -0.40)  |        | 1.71)   | 0.63)   | -0.34)  |        |
| Panama           | 0.91    | 1.10    | 0.65    |        | 4.85     | 5.09     | 0.28    |        | 15.59   | 8.43    | -2.07   |        | 0.26    | 0.14    | -2.06   |        |
|                  | (0.26,  | (0.49,  | (0.53,  | <0.001 | (2.97,   | (3.62,   | (-4.98, | 0.920  | (12.27, | (6.52,  | (-3.63, | 0.010  | (0.01,  | (0.00,  | (-3.51, | 0.006  |
|                  | 2.36)   | 2.13)   | 0.76)   |        | 7.49)    | 6.95)    | 5.82)   |        | 19.59)  | 10.73)  | -0.49)  |        | 1.36)   | 0.74)   | -0.59)  |        |
| Papua New Guinea | 2.50    | 2.60    | 0.07    |        | 17.81    | 18.41    | 0.06    |        | 13.17   | 15.60   | 0.66    |        | 0.22    | 0.26    | 0.65    |        |
|                  | (1.48,  | (1.93,  | (-0.08, | 0.388  | (14.74,  | (16.52,  | (-0.18, | 0.620  | (10.73, | (13.91, | (0.58,  | <0.001 | (0.02,  | (0.08,  | (0.55,  | <0.001 |
|                  | 4.00)   | 3.43)   | 0.22)   |        | 21.34)   | 20.46)   | 0.30)   |        | 16.03)  | 17.44)  | 0.75)   |        | 0.97)   | 0.60)   | 0.75)   |        |
| Paraguay         | 1.45    | 1.74    | 0.62    |        | 8.02     | 8.65     | 0.26    |        | 13.60   | 13.78   | 0.08    |        | 0.23    | 0.24    | 0.09    |        |
|                  | (0.71,  | (1.12,  | (0.57,  | <0.001 | (6.00,   | (7.17,   | (0.15,  | <0.001 | (11.05, | (11.93, | (-0.27, | 0.663  | (0.02,  | (0.06,  | (-0.42, | 0.722  |
|                  | 2.67)   | 2.57)   | 0.67)   |        | 10.50)   | 10.34)   | 0.37)   |        | 16.58)  | 15.85)  | 0.43)   |        | 0.98)   | 0.66)   | 0.62)   |        |
| Peru             | 0.75    | 0.95    | 0.82    |        | 2.38     | 2.43     | 0.08    |        | 9.81    | 4.09    | -3.00   |        | 0.16    | 0.07    | -2.85   |        |
|                  | (0.51,  | (0.73,  | (0.66,  | <0.001 | (1.89,   | (2.08,   | (-0.05, | 0.220  | (8.91,  | (3.62,  | (-3.99, | <0.001 | (0.06,  | (0.02,  | (-3.75, | <0.001 |
|                  | 1.07)   | 1.21)   | 0.97)   |        | 2.95)    | 2.83)    | 0.20)   |        | 10.79)  | 4.60)   | -2.01)  |        | 0.34)   | 0.17)   | -1.94)  |        |

|                       |         |         |         |        |          |          |         |        |         |         |         |        |        |        |         |        |
|-----------------------|---------|---------|---------|--------|----------|----------|---------|--------|---------|---------|---------|--------|--------|--------|---------|--------|
|                       | 1.16    | 1.25    | 0.25    |        | 6.97     | 7.51     | 0.26    |        | 0.88    | 3.09    | 4.60    |        | 0.01   | 0.05   | 6.41    |        |
| Philippines           | (0.97,  | (1.11,  | (0.19,  | <0.001 | (6.48,   | (7.14,   | (0.19,  | <0.001 | (0.72,  | (2.86,  | (4.17,  | <0.001 | (0.00, | (0.03, | (5.56,  | <0.001 |
|                       | 1.38)   | 1.41)   | 0.31)   |        | 7.50)    | 7.89)    | 0.32)   |        | 1.06)   | 3.33)   | 5.03)   |        | 0.06)  | 0.09)  | 7.27)   |        |
|                       | 17.07   | 21.00   | 0.71    |        | 133.36   | 165.83   | 0.74    |        | 2.95    | 4.78    | 1.69    |        | 0.05   | 0.08   | 1.64    |        |
| Poland                | (16.15, | (19.93, | (0.56,  | <0.001 | (130.85, | (162.95, | (0.58,  | <0.001 | (2.57,  | (4.25,  | (0.93,  | <0.001 | (0.01, | (0.02, | (1.05,  | <0.001 |
|                       | 18.03)  | 22.13)  | 0.86)   |        | 135.92)  | 168.77)  | 0.91)   |        | 3.37)   | 5.37)   | 2.46)   |        | 0.14)  | 0.20)  | 2.23)   |        |
|                       | 0.22    | 0.63    | 3.58    |        |          |          |         |        | 10.87   | 8.59    | -0.66   |        | 0.18   | 0.15   | -0.53   |        |
| Portugal              | (0.06,  | (0.31,  | (3.11,  | <0.001 | —        | —        | —       | —      | (9.43,  | (7.21,  | (-1.81, | 0.267  | (0.04, | (0.02, | (-1.42, | 0.243  |
|                       | 0.56)   | 1.18)   | 4.05)   |        |          |          |         |        | 12.46)  | 10.17)  | 0.51)   |        | 0.50)  | 0.52)  | 0.36)   |        |
|                       | 1.79    | 3.35    | 2.21    |        | 9.16     | 22.43    | 3.26    |        | 7.87    | 5.55    | -1.61   |        | 0.13   | 0.10   | -1.25   |        |
| Puerto Rico           | (0.95,  | (2.04,  | (2.09,  | <0.001 | (7.08,   | (18.84,  | (2.66,  | <0.001 | (5.96,  | (3.81,  | (-2.15, | <0.001 | (0.00, | (0.00, | (-2.76, | 0.111  |
|                       | 3.07)   | 5.22)   | 2.33)   |        | 11.66)   | 26.55)   | 3.86)   |        | 10.19)  | 7.83)   | -1.06)  |        | 0.76)  | 0.88)  | 0.29)   |        |
|                       | 4.03    | 4.87    | 0.66    |        | 27.49    | 33.70    | 0.70    |        | 10.85   | 5.48    | -2.26   |        | 0.19   | 0.09   | -2.47   |        |
| Qatar                 | (0.77,  | (2.92,  | (0.59,  | <0.001 | (16.87,  | (28.70,  | (0.49,  | <0.001 | (4.54,  | (3.39,  | (-3.10, | <0.001 | (0.00, | (0.00, | (-3.95, | 0.001  |
|                       | 13.31)  | 8.07)   | 0.73)   |        | 43.17)   | 39.70)   | 0.90)   |        | 22.70)  | 8.82)   | -1.40)  |        | 7.36)  | 2.03)  | -0.96)  |        |
|                       | 16.83   | 22.95   | 1.08    |        | 131.93   | 182.49   | 1.10    |        | 4.47    | 2.22    | -2.41   |        | 0.07   | 0.03   | -3.21   |        |
| Republic of Korea     | (16.03, | (21.96, | (1.06,  | <0.001 | (129.67, | (179.76, | (1.06,  | <0.001 | (4.06,  | (1.91,  | (-2.67, | <0.001 | (0.03, | (0.01, | (-4.08, | <0.001 |
|                       | 17.65)  | 23.98)  | 1.10)   |        | 134.22)  | 185.25)  | 1.15)   |        | 4.90)   | 2.58)   | -2.14)  |        | 0.15)  | 0.11)  | -2.34)  |        |
|                       | 15.91   | 16.22   | 0.06    |        | 125.62   | 126.69   | 0.02    |        | 2.84    | 2.21    | -0.81   |        | 0.04   | 0.03   | -0.58   |        |
| Republic of Moldova   | (13.46, | (13.39, | (0.03,  | 0.001  | (118.69, | (118.90, | (-0.06, | 0.634  | (1.85,  | (1.23,  | (-2.33, | 0.300  | (0.00, | (0.00, | (-2.94, | 0.633  |
|                       | 18.72)  | 19.59)  | 0.10)   |        | 132.88)  | 134.98)  | 0.10)   |        | 4.22)   | 3.81)   | 0.73)   |        | 0.58)  | 0.90)  | 1.83)   |        |
|                       | 14.24   | 24.37   | 1.88    |        | 110.87   | 192.90   | 1.95    |        | 8.10    | 6.02    | -0.93   |        | 0.13   | 0.10   | -0.88   |        |
| Romania               | (13.13, | (22.62, | (1.84,  | <0.001 | (107.77, | (188.06, | (1.84,  | <0.001 | (7.28,  | (5.14,  | (-1.71, | 0.021  | (0.05, | (0.02, | (-1.30, | <0.001 |
|                       | 15.42)  | 26.24)  | 1.91)   |        | 114.04)  | 197.85)  | 2.06)   |        | 9.01)   | 7.01)   | -0.14)  |        | 0.31)  | 0.32)  | -0.46)  |        |
|                       | 17.52   | 18.94   | 0.26    |        | 138.51   | 148.49   | 0.24    |        | 3.01    | 5.72    | 2.35    |        | 0.05   | 0.09   | 2.28    |        |
| Russian Federation    | (17.05, | (18.41, | (0.21,  | <0.001 | (137.23, | (147.09, | (0.20,  | <0.001 | (2.81,  | (5.41,  | (1.25,  | <0.001 | (0.02, | (0.06, | (0.83,  | 0.002  |
|                       | 17.99)  | 19.48)  | 0.32)   |        | 139.80)  | 149.90)  | 0.28)   |        | 3.22)   | 6.04)   | 3.46)   |        | 0.08)  | 0.14)  | 3.76)   |        |
|                       | 0.76    | 0.52    | -1.30   |        | 2.53     |          |         |        | 30.60   | 11.60   | -3.32   |        | 0.51   | 0.19   | -3.33   |        |
| Rwanda                | (0.35,  | (0.28,  | (-1.44, | <0.001 | (1.66,   | —        | —       | —      | (27.67, | (10.33, | (-3.66, | <0.001 | (0.20, | (0.06, | (-3.69, | <0.001 |
|                       | 1.44)   | 0.89)   | -1.16)  |        | 3.68)    |          |         |        | 33.77)  | 12.97)  | -2.98)  |        | 1.11)  | 0.46)  | -2.97)  |        |
|                       | 1.38    | 1.49    | 0.23    |        | 7.66     | 7.54     | -0.12   |        | 26.93   | 9.12    | -3.64   |        | 0.46   | 0.15   | -3.85   |        |
| Saint Kitts and Nevis | (0.00,  | (0.00,  | (0.11,  | <0.001 | (0.02,   | (0.15,   | (-0.37, | 0.341  | (3.91,  | (0.25,  | (-4.02, | <0.001 | (0.00, | (0.00, | (-4.18, | <0.001 |
|                       | 53.16)  | 39.10)  | 0.35)   |        | 64.98)   | 49.27)   | 0.13)   |        | 95.28)  | 52.71)  | -3.26)  |        | 51.41) | 36.63) | -3.52)  |        |

|                                     |         |         |         |        |          |          |         |        |         |         |         |        |        |        |         |        |
|-------------------------------------|---------|---------|---------|--------|----------|----------|---------|--------|---------|---------|---------|--------|--------|--------|---------|--------|
|                                     | 1.11    | 1.22    | 0.31    |        | 6.20     | 6.11     | -0.05   |        | 11.76   | 8.62    | -0.98   |        | 0.20   | 0.15   | -0.90   |        |
| Saint Lucia                         | (0.00,  | (0.00,  | (0.25,  | <0.001 | (0.36,   | (0.84,   | (-0.27, | 0.689  | (2.49,  | (1.73,  | (-1.72, | 0.009  | (0.00, | (0.00, | (-1.96, | 0.098  |
|                                     | 20.11)  | 14.48)  | 0.36)   |        | 29.17)   | 22.31)   | 0.18)   |        | 36.48)  | 26.36)  | -0.25)  |        | 18.49) | 12.52) | 0.17)   |        |
|                                     | 1.02    | 1.13    | 0.31    |        | 5.48     | 5.53     | -0.04   |        | 20.74   | 15.10   | -1.00   |        | 0.34   | 0.25   | -0.99   |        |
| Saint Vincent and<br>the Grenadines | (0.00,  | (0.00,  | (0.17,  | <0.001 | (0.11,   | (0.22,   | (-0.28, | 0.753  | (6.11,  | (3.26,  | (-1.62, | 0.002  | (0.00, | (0.00, | (-1.63, | 0.003  |
|                                     | 25.64)  | 20.57)  | 0.46)   |        | 33.78)   | 28.35)   | 0.20)   |        | 54.78)  | 43.56)  | -0.37)  |        | 24.42) | 18.84) | -0.34)  |        |
|                                     | 2.94    | 3.01    | 0.06    |        | 20.84    | 21.56    | 0.12    |        | 20.25   | 22.21   | 0.33    |        | 0.34   | 0.37   | 0.30    |        |
| Samoa                               | (0.03,  | (0.10,  | (-0.04, | 0.262  | (6.69,   | (8.89,   | (-0.09, | 0.256  | (7.12,  | (9.88,  | (0.29,  | <0.001 | (0.00, | (0.00, | (0.18,  | <0.001 |
|                                     | 22.26)  | 16.91)  | 0.16)   |        | 49.77)   | 44.10)   | 0.32)   |        | 47.26)  | 43.88)  | 0.36)   |        | 17.71) | 12.26) | 0.41)   |        |
|                                     | 0.67    | 2.51    | 4.64    |        | 2.24     | 16.74    | 7.08    |        | 3.02    | 4.79    | 1.57    |        | 0.05   | 0.08   | 1.62    |        |
| San Marino                          | (0.00,  | (0.00,  | (4.43,  | <0.001 | (0.00,   | (0.40,   | (4.64,  | <0.001 | (0.00,  | (0.00,  | (1.34,  | <0.001 | (0.00, | (0.00, | (1.28,  | <0.001 |
|                                     | 94.61)  | 83.53)  | 4.86)   |        | 97.94)   | 107.11)  | 9.58)   |        | 99.07)  | 87.75)  | 1.80)   |        | 93.39) | 79.11) | 1.97)   |        |
|                                     | 0.68    | 0.73    | 0.22    |        | 2.34     | 2.53     | 0.14    |        | 12.81   | 18.95   | 1.34    |        | 0.21   | 0.30   | 1.36    |        |
| Sao Tome and<br>Principe            | (0.00,  | (0.00,  | (0.09,  | 0.001  | (0.00,   | (0.05,   | (-0.07, | 0.188  | (2.23,  | (8.30,  | (0.16,  | 0.025  | (0.00, | (0.00, | (0.08,  | 0.037  |
|                                     | 26.54)  | 11.47)  | 0.34)   |        | 30.02)   | 14.85)   | 0.35)   |        | 44.97)  | 37.77)  | 2.53)   |        | 25.67) | 10.63) | 2.66)   |        |
|                                     | 3.39    | 4.19    | 0.63    |        | 24.44    | 29.00    | 0.39    |        | 26.69   | 22.45   | -0.65   |        | 0.46   | 0.39   | -0.60   |        |
| Saudi Arabia                        | (2.69,  | (3.75,  | (0.42,  | <0.001 | (22.44,  | (27.88,  | (-0.59, | 0.441  | (24.70, | (21.42, | (-0.85, | <0.001 | (0.23, | (0.26, | (-0.92, | <0.001 |
|                                     | 4.21)   | 4.66)   | 0.85)   |        | 26.59)   | 30.15)   | 1.37)   |        | 28.81)  | 23.53)  | -0.45)  |        | 0.83)  | 0.56)  | -0.28)  |        |
|                                     | 0.58    | 0.61    | 0.18    |        | 2.05     | 2.05     | 0.15    |        | 13.37   | 14.36   | 0.22    |        | 0.21   | 0.23   | 0.24    |        |
| Senegal                             | (0.23,  | (0.36,  | (0.05,  | 0.008  | (1.27,   | (1.52,   | (0.04,  | 0.007  | (11.55, | (13.06, | (-0.68, | 0.636  | (0.04, | (0.09, | (-0.84, | 0.669  |
|                                     | 1.22)   | 0.99)   | 0.31)   |        | 3.14)    | 2.72)    | 0.26)   |        | 15.42)  | 15.76)  | 1.13)   |        | 0.69)  | 0.49)  | 1.33)   |        |
|                                     | 17.34   | 21.90   | 0.82    |        | 135.29   | 173.67   | 0.89    |        | 10.64   | 8.21    | -0.80   |        | 0.18   | 0.14   | -0.82   |        |
| Serbia                              | (15.45, | (19.56, | (0.77,  | <0.001 | (129.99, | (167.13, | (0.71,  | <0.001 | (9.17,  | (6.81,  | (-1.14, | <0.001 | (0.04, | (0.02, | (-1.71, | 0.073  |
|                                     | 19.41)  | 24.45)  | 0.86)   |        | 140.77)  | 180.42)  | 1.07)   |        | 12.28)  | 9.83)   | -0.45)  |        | 0.54)  | 0.54)  | 0.08)   |        |
|                                     | 1.58    | 1.74    | 0.33    |        | 11.31    | 12.58    | 0.41    |        | 10.67   | 8.62    | -0.71   |        | 0.18   | 0.15   | -0.41   |        |
| Seychelles                          | (0.00,  | (0.00,  | (0.25,  | <0.001 | (0.70,   | (1.92,   | (0.24,  | <0.001 | (0.75,  | (0.64,  | (-1.09, | <0.001 | (0.00, | (0.00, | (-0.69, | 0.005  |
|                                     | 38.18)  | 27.04)  | 0.42)   |        | 54.66)   | 44.34)   | 0.58)   |        | 52.57)  | 38.67)  | -0.33)  |        | 35.78) | 24.13) | -0.12)  |        |
|                                     | 0.52    | 0.58    | 0.29    |        |          | 2.00     |         |        | 14.63   | 21.40   | 1.33    |        | 0.23   | 0.34   | 1.41    |        |
| Sierra Leone                        | (0.12,  | (0.26,  | (0.06,  | 0.013  | —        | (1.31,   | —       | —      | (11.98, | (19.32, | (1.04,  | <0.001 | (0.02, | (0.13, | (1.16,  | <0.001 |
|                                     | 1.48)   | 1.11)   | 0.52)   |        |          | 2.92)    |         |        | 17.74)  | 23.67)  | 1.63)   |        | 1.03)  | 0.78)  | 1.65)   |        |
|                                     | 20.02   | 27.62   | 1.11    |        | 158.29   | 218.92   | 1.14    |        | 7.41    | 2.52    | -3.96   |        | 0.12   | 0.04   | -4.10   |        |
| Singapore                           | (16.98, | (24.66, | (1.10,  | <0.001 | (149.54, | (210.97, | (1.06,  | <0.001 | (5.59,  | (1.65,  | (-5.24, | <0.001 | (0.00, | (0.00, | (-5.75, | <0.001 |
|                                     | 23.51)  | 30.97)  | 1.12)   |        | 167.46)  | 227.21)  | 1.23)   |        | 9.68)   | 3.83)   | -2.65)  |        | 0.85)  | 0.75)  | -2.41)  |        |

|                 |         |         |         |        |          |          |         |        |         |         |         |        |        |        |         |        |
|-----------------|---------|---------|---------|--------|----------|----------|---------|--------|---------|---------|---------|--------|--------|--------|---------|--------|
|                 | 9.23    | 12.96   | 1.17    |        | 70.03    | 101.40   | 1.28    |        | 6.76    | 9.97    | 1.41    |        | 0.11   | 0.17   | 1.46    |        |
| Slovakia        | (7.48,  | (10.78, | (1.06,  | <0.001 | (65.14,  | (95.41,  | (0.91,  | <0.001 | (5.27,  | (7.99,  | (1.00,  | <0.001 | (0.00, | (0.01, | (0.60,  | 0.001  |
|                 | 11.29)  | 15.54)  | 1.28)   |        | 75.21)   | 107.75)  | 1.65)   |        | 8.57)   | 12.38)  | 1.81)   |        | 0.61)  | 0.88)  | 2.33)   |        |
|                 | 16.08   | 22.43   | 1.15    |        | 124.94   | 177.58   | 1.23    |        | 4.74    | 4.08    | -0.59   |        | 0.08   | 0.07   | -0.44   |        |
| Slovenia        | (12.37, | (17.48, | (1.13,  | <0.001 | (114.34, | (163.72, | (1.10,  | <0.001 | (2.86,  | (2.20,  | (-1.33, | 0.119  | (0.00, | (0.00, | (-1.21, | 0.263  |
|                 | 20.62)  | 28.56)  | 1.18)   |        | 136.33)  | 192.52)  | 1.35)   |        | 7.48)   | 7.24)   | 0.15)   |        | 1.30)  | 1.92)  | 0.33)   |        |
|                 | 2.32    | 2.28    | -0.13   |        | 16.39    | 15.98    | -0.10   |        | 23.25   | 25.22   | 0.29    |        | 0.39   | 0.42   | 0.28    |        |
| Solomon Islands | (0.10,  | (0.44,  | (-0.35, | 0.248  | (6.88,   | (9.61,   | (-0.44, | 0.542  | (12.36, | (17.26, | (0.17,  | <0.001 | (0.00, | (0.00, | (0.11,  | 0.002  |
|                 | 12.76)  | 7.01)   | 0.09)   |        | 33.30)   | 25.00)   | 0.23)   |        | 40.82)  | 35.69)  | 0.40)   |        | 9.51)  | 3.99)  | 0.45)   |        |
|                 | 0.48    | 0.36    | -1.05   |        |          |          |         |        | 20.57   | 11.32   | -2.04   |        | 0.34   | 0.19   | -2.09   |        |
| Somalia         | (0.17,  | (0.18,  | (-1.19, | <0.001 | —        | —        | —       | —      | (18.08, | (10.23, | (-2.14, | <0.001 | (0.10, | (0.07, | (-2.37, | <0.001 |
|                 | 1.09)   | 0.65)   | -0.91)  |        |          |          |         |        | 23.33)  | 12.51)  | -1.95)  |        | 0.89)  | 0.41)  | -1.81)  |        |
|                 | 1.17    | 0.93    | -0.81   |        | 6.35     | 5.19     | -0.70   |        | 36.75   | 11.82   | -3.73   |        | 0.62   | 0.20   | -3.73   |        |
| South Africa    | (0.93,  | (0.76,  | (-0.90, | <0.001 | (5.76,   | (4.79,   | (-0.86, | <0.001 | (35.41, | (11.21, | (-5.17, | <0.001 | (0.46, | (0.13, | (-5.23, | <0.001 |
|                 | 1.44)   | 1.11)   | -0.72)  |        | 6.99)    | 5.60)    | -0.54)  |        | 38.14)  | 12.45)  | -2.28)  |        | 0.83)  | 0.30)  | -2.21)  |        |
|                 | 0.89    | 0.79    | -0.43   |        | 5.17     | 2.70     | -2.26   |        | 16.39   | 8.83    | -2.15   |        | 0.27   | 0.15   | -2.01   |        |
| South Sudan     | (0.38,  | (0.41,  | (-0.53, | <0.001 | (3.69,   | (1.94,   | (-2.95, | <0.001 | (13.95, | (7.46,  | (-2.46, | <0.001 | (0.05, | (0.02, | (-2.51, | <0.001 |
|                 | 1.81)   | 1.38)   | -0.32)  |        | 7.06)    | 3.67)    | -1.56)  |        | 19.17)  | 10.40)  | -1.84)  |        | 0.95)  | 0.51)  | -1.51)  |        |
|                 | 0.66    | 1.19    | 2.01    |        | 2.25     | 4.46     | 1.97    |        | 9.82    | 5.90    | -1.84   |        | 0.16   | 0.10   | -1.84   |        |
| Spain           | (0.49,  | (0.94,  | (1.76,  | <0.001 | (1.91,   | (4.04,   | (1.23,  | <0.001 | (9.12,  | (5.31,  | (-2.52, | <0.001 | (0.08, | (0.04, | (-2.03, | <0.001 |
|                 | 0.88)   | 1.48)   | 2.26)   |        | 2.63)    | 4.92)    | 2.70)   |        | 10.57)  | 6.53)   | -1.16)  |        | 0.29)  | 0.22)  | -1.65)  |        |
|                 | 1.29    | 1.48    | 0.47    |        | 7.71     | 8.84     | 0.43    |        | 11.47   | 4.75    | -2.91   |        | 0.19   | 0.08   | -2.79   |        |
| Sri Lanka       | (0.95,  | (1.14,  | (0.47,  | <0.001 | (6.81,   | (7.99,   | (0.25,  | <0.001 | (10.39, | (4.11,  | (-3.46, | <0.001 | (0.08, | (0.02, | (-3.47, | <0.001 |
|                 | 1.73)   | 1.90)   | 0.48)   |        | 8.70)    | 9.77)    | 0.61)   |        | 12.63)  | 5.47)   | -2.36)  |        | 0.40)  | 0.22)  | -2.11)  |        |
|                 | 1.70    | 1.90    | 0.40    |        | 12.04    | 13.47    | 0.46    |        | 28.98   | 21.03   | -1.08   |        | 0.49   | 0.35   | -1.12   |        |
| Sudan           | (1.29,  | (1.61,  | (0.33,  | <0.001 | (10.87,  | (12.66,  | (0.36,  | <0.001 | (27.26, | (20.06, | (-1.19, | <0.001 | (0.28, | (0.24, | (-1.29, | <0.001 |
|                 | 2.21)   | 2.22)   | 0.48)   |        | 13.32)   | 14.30)   | 0.56)   |        | 30.80)  | 22.03)  | -0.96)  |        | 0.79)  | 0.51)  | -0.94)  |        |
|                 | 1.39    | 1.51    | 0.18    |        | 7.99     | 8.04     | -0.06   |        | 23.45   | 23.34   | 0.08    |        | 0.39   | 0.38   | 0.10    |        |
| Suriname        | (0.03,  | (0.13,  | (-0.02, | 0.070  | (2.56,   | (3.66,   | (-0.49, | 0.787  | (13.77, | (15.14, | (-1.08, | 0.897  | (0.00, | (0.00, | (-1.47, | 0.903  |
|                 | 8.77)   | 6.21)   | 0.37)   |        | 18.97)   | 15.39)   | 0.38)   |        | 37.91)  | 34.45)  | 1.25)   |        | 7.04)  | 4.29)  | 1.69)   |        |
|                 | 1.93    | 5.07    | 3.41    |        | 11.94    | 37.57    | 4.17    |        | 4.60    | 2.93    | -1.53   |        | 0.08   | 0.05   | -1.65   |        |
| Sweden          | (1.29,  | (4.04,  | (3.14,  | <0.001 | (10.27,  | (34.75,  | (3.85,  | <0.001 | (3.56,  | (2.14,  | (-2.58, | 0.005  | (0.00, | (0.00, | (-2.28, | <0.001 |
|                 | 2.80)   | 6.30)   | 3.68)   |        | 13.82)   | 40.58)   | 4.49)   |        | 5.86)   | 3.93)   | -0.46)  |        | 0.43)  | 0.38)  | -1.01)  |        |

|                  |         |         |         |        |          |          |         |        |          |          |         |        |         |         |         |        |
|------------------|---------|---------|---------|--------|----------|----------|---------|--------|----------|----------|---------|--------|---------|---------|---------|--------|
|                  | 1.37    | 3.70    | 3.59    |        | 7.90     | 25.84    | 4.31    |        | 5.26     | 2.65     | -2.30   |        | 0.09    | 0.04    | -2.67   |        |
| Switzerland      | (0.82,  | (2.79,  | (3.14,  | <0.001 | (6.50,   | (23.43,  | (3.44,  | <0.001 | (4.10,   | (1.87,   | (-2.76, | <0.001 | (0.00,  | (0.00,  | (-3.55, | <0.001 |
|                  | 2.21)   | 4.87)   | 4.05)   |        | 9.56)    | 28.47)   | 5.19)   |        | 6.69)    | 3.68)    | -1.85)  |        | 0.54)   | 0.46)   | -1.78)  |        |
| Syrian Arab      | 2.65    | 2.38    | -0.38   |        | 18.50    | 16.65    | -0.38   |        | 108.10   | 42.79    | -3.10   |        | 1.80    | 0.71    | -3.12   |        |
| Republic         | (1.98,  | (1.81,  | (-0.49, | <0.001 | (16.53,  | (15.07,  | (-0.61, | 0.001  | (103.72, | (40.34,  | (-3.73, | <0.001 | (1.27,  | (0.42,  | (-3.78, | <0.001 |
|                  | 3.51)   | 3.08)   | -0.28)  |        | 20.64)   | 18.36)   | -0.14)  |        | 112.65)  | 45.37)   | -2.47)  |        | 2.50)   | 1.14)   | -2.45)  |        |
| Taiwan (Province | 4.61    | 14.04   | 3.82    |        | 36.55    | 108.55   | 3.74    |        | 8.14     | 5.63     | -1.33   |        | 0.13    | 0.09    | -1.34   |        |
| of China)        | (4.02,  | (12.93, | (3.63,  | <0.001 | (34.84,  | (105.55, | (3.55,  | <0.001 | (7.33,   | (4.91,   | (-2.13, | 0.001  | (0.05,  | (0.02,  | (-2.30, | 0.007  |
|                  | 5.28)   | 15.23)  | 4.01)   |        | 38.33)   | 111.64)  | 3.93)   |        | 9.01)    | 6.43)    | -0.53)  |        | 0.29)   | 0.27)   | -0.38)  |        |
| Tajikistan       | 7.31    | 6.97    | -0.16   |        | 57.73    | 54.07    | -0.22   |        | 4.70     | 4.72     | 0.12    |        | 0.08    | 0.08    | 0.00    |        |
|                  | (5.67,  | (5.85,  | (-0.19, | <0.001 | (52.76,  | (50.81,  | (-0.33, | <0.001 | (3.46,   | (3.82,   | (-0.14, | 0.371  | (0.00,  | (0.01,  | (-0.73, | 0.994  |
|                  | 9.32)   | 8.26)   | -0.14)  |        | 63.07)   | 57.50)   | -0.12)  |        | 6.29)    | 5.79)    | 0.38)   |        | 0.63)   | 0.35)   | 0.74)   |        |
| Thailand         | 1.27    | 1.55    | 0.68    |        | 7.65     | 9.39     | 0.74    |        | 2.32     | 3.40     | 1.36    |        | 0.04    | 0.06    | 1.53    |        |
|                  | (1.08,  | (1.35,  | (0.62,  | <0.001 | (7.16,   | (8.89,   | (0.65,  | <0.001 | (2.06,   | (3.08,   | (0.56,  | 0.001  | (0.01,  | (0.02,  | (0.59,  | 0.001  |
|                  | 1.49)   | 1.79)   | 0.75)   |        | 8.17)    | 9.91)    | 0.84)   |        | 2.60)    | 3.74)    | 2.15)   |        | 0.09)   | 0.12)   | 2.48)   |        |
| Timor-Leste      | 1.05    | 1.20    | 0.45    |        | 6.26     | 7.31     | 0.49    |        | 2.04     | 2.70     | 1.10    |        | 0.03    | 0.04    | 1.44    |        |
|                  | (0.08,  | (0.21,  | (0.38,  | <0.001 | (2.72,   | (3.97,   | (0.29,  | <0.001 | (0.42,   | (1.03,   | (0.33,  | 0.005  | (0.00,  | (0.00,  | (-2.10, | 0.429  |
|                  | 4.82)   | 4.00)   | 0.53)   |        | 12.37)   | 12.37)   | 0.69)   |        | 6.29)    | 6.01)    | 1.89)   |        | 3.10)   | 2.17)   | 5.12)   |        |
| Togo             | 0.55    | 0.54    | -0.07   |        | 1.92     | 1.80     | -0.02   |        | 18.19    | 18.95    | 0.13    |        | 0.29    | 0.30    | 0.16    |        |
|                  | (0.13,  | (0.24,  | (-0.21, | 0.325  | (0.93,   | (1.18,   | (-0.13, | 0.715  | (15.20,  | (16.92,  | (-0.11, | 0.300  | (0.04,  | (0.10,  | (-0.19, | 0.376  |
|                  | 1.57)   | 1.05)   | 0.07)   |        | 3.53)    | 2.62)    | 0.09)   |        | 21.65)   | 21.17)   | 0.37)   |        | 1.16)   | 0.72)   | 0.51)   |        |
| Tokelau          | 2.49    | 2.74    | 0.32    |        | 17.96    | 19.75    | 0.34    |        | 25.04    | 25.04    | -0.00   |        | 0.42    | 0.42    | 0.02    |        |
|                  | (0.00,  | (0.00,  | (0.28,  | <0.001 | (0.00,   | (0.00,   | (0.13,  | 0.002  | (0.00,   | (0.00,   | (-0.02, | 0.878  | (0.00,  | (0.00,  | (-0.09, | 0.725  |
|                  | 1708.58 | 2312.88 | 0.36)   |        | 1736.79) | 2344.10) | 0.55)   |        | 1749.93) | 2347.45) | 0.02)   |        | 1704.86 | 2308.75 | 0.13)   |        |
|                  | )       | )       |         |        |          |          |         |        |          |          |         |        | )       | )       |         |        |
| Tonga            | 2.75    | 2.80    | 0.05    |        | 19.66    | 20.21    | 0.09    |        | 15.19    | 14.86    | -0.07   |        | 0.26    | 0.25    | -0.19   |        |
|                  | (0.00,  | (0.00,  | (-0.03, | 0.196  | (3.66,   | (4.98,   | (-0.08, | 0.305  | (2.47,   | (2.85,   | (-0.16, | 0.164  | (0.00,  | (0.00,  | (-0.34, | 0.021  |
|                  | 33.55)  | 26.51)  | 0.13)   |        | 61.38)   | 54.57)   | 0.25)   |        | 52.90)   | 45.86)   | 0.03)   |        | 29.06)  | 21.64)  | -0.03)  |        |
| Trinidad and     | 1.40    | 1.44    | 0.07    |        | 7.92     | 7.10     | -0.45   |        | 25.62    | 17.94    | -1.38   |        | 0.42    | 0.29    | -1.38   |        |
| Tobago           | (0.33,  | (0.39,  | (-0.04, | 0.199  | (4.71,   | (4.46,   | (-0.61, | <0.001 | (19.73,  | (13.01,  | (-2.18, | 0.001  | (0.01,  | (0.00,  | (-2.16, | 0.001  |
|                  | 3.96)   | 4.01)   | 0.19)   |        | 12.52)   | 11.01)   | -0.30)  |        | 32.80)   | 24.24)   | -0.57)  |        | 2.42)   | 2.34)   | -0.59)  |        |
| Tunisia          | 2.32    | 2.64    | 0.51    |        | 16.63    | 18.58    | 0.41    |        | 20.20    | 15.21    | -0.99   |        | 0.34    | 0.26    | -0.96   |        |
|                  | (1.62,  | (2.03,  | (0.40,  | <0.001 | (14.58,  | (16.96,  | (0.32,  | <0.001 | (18.04,  | (13.67,  | (-1.18, | <0.001 | (0.12,  | (0.10,  | (-1.09, | <0.001 |

|                                 |         |         |         |         |          |          |         |         |         |         |         |         |         |         |         |         |
|---------------------------------|---------|---------|---------|---------|----------|----------|---------|---------|---------|---------|---------|---------|---------|---------|---------|---------|
|                                 | 3.23)   | 3.39)   | 0.61)   |         | 18.89)   | 20.33)   | 0.51)   |         | 22.57)  | 16.89)  | -0.80)  |         | 0.81)   | 0.59)   | -0.84)  |         |
|                                 | 3.46)   | 3.61)   | 0.15)   |         | 24.92)   | 25.54)   | 0.10)   |         | 29.41)  | 12.67)  | -2.85)  |         | 0.51)   | 0.22)   | -2.85)  |         |
| Turkey                          | (3.12,  | (3.33,  | (-0.14, | 0.310)  | (23.97,  | (24.81,  | (-0.30, | 0.624)  | (28.41, | (12.14, | (-3.25, | <0.001) | (0.38,  | (0.15,  | (-3.22, | <0.001) |
|                                 | 3.83)   | 3.90)   | 0.44)   |         | 25.90)   | 26.30)   | 0.50)   |         | 30.44)  | 13.22)  | -2.44)  |         | 0.66)   | 0.30)   | -2.47)  |         |
|                                 | 7.87)   | 9.23)   | 0.55)   |         | 61.71)   | 69.74)   | 0.43)   |         | 3.74)   | 4.50)   | 0.67)   |         | 0.06)   | 0.07)   | 0.63)   |         |
| Turkmenistan                    | (5.94,  | (7.41,  | (0.52,  | <0.001) | (55.92,  | (64.57,  | (0.34,  | <0.001) | (2.51,  | (3.24,  | (-0.22, | 0.141)  | (0.00,  | (0.00,  | (-1.34, | 0.533)  |
|                                 | 10.26)  | 11.37)  | 0.58)   |         | 67.95)   | 75.22)   | 0.53)   |         | 5.42)   | 6.11)   | 1.58)   |         | 0.72)   | 0.56)   | 2.64)   |         |
|                                 | 2.27)   | 2.39)   | 0.16)   |         | 16.38)   | 17.09)   | 0.18)   |         | 25.95)  | 25.44)  | -0.08)  |         | 0.43)   | 0.42)   | -0.10)  |         |
| Tuvalu                          | (0.00,  | (0.00,  | (0.10,  | <0.001) | (0.00,   | (0.00,   | (0.09,  | <0.001) | (0.03,  | (0.05,  | (-0.17, | 0.131)  | (0.00,  | (0.00,  | (-0.20, | 0.061)  |
|                                 | 208.23) | 200.40) | 0.21)   |         | 235.43)  | 228.90)  | 0.26)   |         | 253.01) | 241.65) | 0.02)   |         | 204.56) | 196.57) | 0.00)   |         |
|                                 | 0.46)   | 0.50)   | 0.26)   |         |          |          |         |         | 11.70)  | 10.22)  | -0.50)  |         | 0.20)   | 0.17)   | -0.54)  |         |
| Uganda                          | (0.24,  | (0.35,  | (0.05,  | 0.017)  | —        | —        | —       | —       | (10.49, | (9.51,  | (-0.89, | 0.013)  | (0.07,  | (0.09,  | (-0.78, | <0.001) |
|                                 | 0.82)   | 0.70)   | 0.47)   |         |          |          |         |         | 13.02)  | 10.97)  | -0.11)  |         | 0.47)   | 0.30)   | -0.30)  |         |
|                                 | 16.12)  | 15.76)  | -0.07)  |         | 127.72)  | 122.12)  | -0.16)  |         | 1.55)   | 3.88)   | 3.18)   |         | 0.02)   | 0.06)   | 3.05)   |         |
| Ukraine                         | (15.34, | (14.90, | (-0.14, | 0.037)  | (125.57, | (119.83, | (-0.29, | 0.025)  | (1.31,  | (3.43,  | (0.38,  | 0.026)  | (0.00,  | (0.02,  | (-1.17, | 0.159)  |
|                                 | 16.92)  | 16.67)  | -0.01)  |         | 129.91)  | 124.46)  | -0.02)  |         | 1.82)   | 4.39)   | 6.05)   |         | 0.08)   | 0.17)   | 7.46)   |         |
|                                 | 3.50)   | 3.78)   | 0.26)   |         | 25.51)   | 25.54)   | -0.14)  |         | 28.63)  | 22.55)  | -0.85)  |         | 0.48)   | 0.38)   | -0.75)  |         |
| United Arab<br>Emirates         | (1.72,  | (2.73,  | (0.22,  | <0.001) | (20.14,  | (23.06,  | (-0.29, | 0.088)  | (22.79, | (19.72, | (-1.06, | <0.001) | (0.03,  | (0.10,  | (-1.41, | 0.027)  |
|                                 | 6.47)   | 5.19)   | 0.30)   |         | 31.98)   | 28.32)   | 0.02)   |         | 35.58)  | 25.73)  | -0.64)  |         | 2.32)   | 1.11)   | -0.09)  |         |
|                                 | 10.08)  | 14.40)  | 1.22)   |         | 77.58)   | 112.95)  | 1.29)   |         | 5.89)   | 5.89)   | 0.02)   |         | 0.10)   | 0.10)   | -0.04)  |         |
| United Kingdom                  | (9.49,  | (13.72, | (1.05,  | <0.001) | (75.93,  | (111.07, | (1.13,  | <0.001) | (5.44,  | (5.45,  | (-0.49, | 0.947)  | (0.05,  | (0.05,  | (-0.15, | 0.464)  |
|                                 | 10.70)  | 15.11)  | 1.38)   |         | 79.26)   | 114.85)  | 1.44)   |         | 6.38)   | 6.36)   | 0.52)   |         | 0.18)   | 0.18)   | 0.07)   |         |
|                                 | 0.53)   | 0.55)   | 0.14)   |         |          | 1.88)    |         |         | 16.23)  | 10.57)  | -1.44)  |         | 0.27)   | 0.18)   | -1.40)  |         |
| United Republic of<br>Tanzania  | (0.33,  | (0.42,  | (-0.01, | 0.070)  | —        | (1.61,   | —       | —       | (15.10, | (9.97,  | (-1.76, | <0.001) | (0.14,  | (0.11,  | (-1.71, | <0.001) |
|                                 | 0.80)   | 0.72)   | 0.29)   |         |          | 2.19)    |         |         | 17.44)  | 11.20)  | -1.13)  |         | 0.48)   | 0.28)   | -1.08)  |         |
|                                 | 74.75)  | 76.84)  | 0.06)   |         | 604.96)  | 623.04)  | 0.06)   |         | 11.68)  | 8.17)   | -1.19)  |         | 0.19)   | 0.13)   | -1.05)  |         |
| United States of<br>America     | (74.03, | (76.12, | (-0.08, | 0.413)  | (602.91, | (621.02, | (-0.09, | 0.418)  | (11.39, | (7.94,  | (-1.66, | <0.001) | (0.16,  | (0.10,  | (-1.40, | <0.001) |
|                                 | 75.49)  | 77.56)  | 0.21)   |         | 607.00)  | 625.08)  | 0.22)   |         | 11.97)  | 8.41)   | -0.73)  |         | 0.23)   | 0.16)   | -0.70)  |         |
|                                 | 1.90)   | 3.03)   | 1.60)   |         | 11.41)   | 19.67)   | 1.75)   |         | 28.29)  | 17.14)  | -1.69)  |         | 0.47)   | 0.29)   | -1.63)  |         |
| United States<br>Virgin Islands | (0.00,  | (0.00,  | (1.32,  | <0.001) | (1.84,   | (4.71,   | (1.40,  | <0.001) | (10.31, | (3.20,  | (-1.90, | <0.001) | (0.00,  | (0.00,  | (-1.91, | <0.001) |
|                                 | 23.02)  | 31.50)  | 1.88)   |         | 38.40)   | 56.76)   | 2.10)   |         | 62.80)  | 54.23)  | -1.48)  |         | 20.36)  | 26.58)  | -1.36)  |         |
|                                 | 2.97)   | 3.98)   | 1.00)   |         | 20.94)   | 28.54)   | 1.08)   |         | 6.65)   | 6.03)   | -0.46)  |         | 0.11)   | 0.10)   | -0.31)  |         |
| Uruguay                         | (1.73,  | (2.57,  | (0.96,  | <0.001) | (17.35,  | (24.54,  | (0.80,  | <0.001) | (4.70,  | (4.25,  | (-0.75, | 0.002)  | (0.00,  | (0.00,  | (-0.85, | 0.260)  |



|                |        |         |         |        |         |          |         |        |         |         |         |        |        |        |         |        |
|----------------|--------|---------|---------|--------|---------|----------|---------|--------|---------|---------|---------|--------|--------|--------|---------|--------|
|                | 4.77)  | 5.90)   | 1.04)   |        | 25.05)  | 33.02)   | 1.36)   |        | 9.13)   | 8.33)   | -0.17)  |        | 0.87)  | 0.84)  | 0.23)   |        |
|                | 7.07   | 8.14    | 0.49    |        | 55.51   | 61.87    | 0.37    |        | 2.83    | 8.42    | 3.58    |        | 0.04   | 0.14   | 3.76    |        |
| Uzbekistan     | (6.27, | (7.50,  | (0.47,  | <0.001 | (53.15, | (60.06,  | (0.32,  | <0.001 | (2.35,  | (7.76,  | (2.56,  | <0.001 | (0.00, | (0.06, | (2.47,  | <0.001 |
|                | 7.96)  | 8.83)   | 0.51)   |        | 57.95)  | 63.72)   | 0.43)   |        | 3.39)   | 9.13)   | 4.62)   |        | 0.18)  | 0.26)  | 5.06)   |        |
|                | 2.51   | 2.43    | -0.16   |        | 17.78   | 17.39    | -0.09   |        | 15.49   | 23.58   | 1.43    |        | 0.26   | 0.39   | 1.29    |        |
| Vanuatu        | (0.01, | (0.14,  | (-0.27, | 0.008  | (5.32,  | (8.08,   | (-0.26, | 0.341  | (4.57,  | (12.88, | (1.07,  | <0.001 | (0.00, | (0.00, | (0.74,  | <0.001 |
|                | 20.37) | 11.69)  | -0.04)  |        | 44.05)  | 32.94)   | 0.09)   |        | 39.73)  | 40.15)  | 1.79)   |        | 16.35) | 8.20)  | 1.85)   |        |
| Venezuela      | 0.91   | 1.08    | 0.57    |        | 4.92    | 4.98     | -0.01   |        | 12.27   | 16.19   | 0.95    |        | 0.21   | 0.27   | 0.96    |        |
| (Bolivarian    | (0.63, | (0.83,  | (0.45,  | <0.001 | (4.22,  | (4.43,   | (-0.21, | 0.965  | (11.19, | (15.14, | (-0.12, | 0.083  | (0.09, | (0.15, | (-0.47, | 0.189  |
| Republic of)   | 1.27)  | 1.39)   | 0.69)   |        | 5.71)   | 5.59)    | 0.20)   |        | 13.43)  | 17.28)  | 2.03)   |        | 0.42)  | 0.45)  | 2.42)   |        |
|                | 1.08   | 1.33    | 0.71    |        | 6.39    | 7.86     | 0.70    |        | 2.83    | 2.08    | -1.06   |        | 0.05   | 0.04   | -0.74   |        |
| Viet Nam       | (0.91, | (1.18,  | (0.65,  | <0.001 | (5.95,  | (7.50,   | (0.64,  | <0.001 | (2.56,  | (1.89,  | (-1.17, | <0.001 | (0.02, | (0.01, | (-0.74, | <0.001 |
|                | 1.27)  | 1.50)   | 0.77)   |        | 6.86)   | 8.24)    | 0.76)   |        | 3.13)   | 2.30)   | -0.94)  |        | 0.10)  | 0.08)  | -0.74)  |        |
|                | 1.74   | 1.73    | -0.02   |        | 12.36   | 12.12    | -0.08   |        | 19.50   | 18.79   | -0.08   |        | 0.34   | 0.32   | -0.05   |        |
| Yemen          | (1.23, | (1.42,  | (-0.06, | 0.522  | (10.87, | (11.25,  | (-0.21, | 0.206  | (17.67, | (17.72, | (-0.42, | 0.638  | (0.14, | (0.20, | (-0.57, | 0.855  |
|                | 2.41)  | 2.10)   | 0.03)   |        | 13.99)  | 13.03)   | 0.05)   |        | 21.48)  | 19.90)  | 0.26)   |        | 0.70)  | 0.50)  | 0.48)   |        |
|                | 0.64   | 0.57    | -0.42   |        | 2.06    | 1.88     | -0.17   |        | 19.53   | 12.56   | -1.54   |        | 0.32   | 0.21   | -1.49   |        |
| Zambia         | (0.27, | (0.34,  | (-0.68, | 0.001  | (1.25,  | (1.41,   | (-0.70, | 0.545  | (17.25, | (11.43, | (-1.81, | <0.001 | (0.09, | (0.09, | (-1.72, | <0.001 |
|                | 1.33)  | 0.89)   | -0.16)  |        | 3.21)   | 2.45)    | 0.37)   |        | 22.06)  | 13.78)  | -1.26)  |        | 0.88)  | 0.44)  | -1.25)  |        |
|                | 0.74   | 0.78    | 0.14    |        | 2.46    | 2.68     | 0.24    |        | 14.40   | 18.12   | 0.78    |        | 0.24   | 0.30   | 0.80    |        |
| Zimbabwe       | (0.39, | (0.50,  | (0.00,  | 0.044  | (1.71,  | (2.11,   | (0.07,  | 0.007  | (12.72, | (16.66, | (0.07,  | 0.032  | (0.07, | (0.14, | (-0.63, | 0.275  |
|                | 1.30)  | 1.17)   | 0.27)   |        | 3.41)   | 3.36)    | 0.42)   |        | 16.26)  | 19.67)  | 1.51)   |        | 0.63)  | 0.57)  | 2.26)   |        |
| <b>Men</b>     |        |         |         |        |         |          |         |        |         |         |         |        |        |        |         |        |
|                | 1.13   | 1.12    | -0.04   |        | 6.10    | 5.93     | -0.09   |        | 20.04   | 18.91   | -0.09   |        | 0.33   | 0.32   | -0.03   |        |
| Afghanistan    | (0.60, | (0.87,  | (-0.16, | 0.470  | (4.65,  | (5.28,   | (-0.41, | 0.581  | (17.76, | (17.88, | (-0.27, | 0.310  | (0.10, | (0.19, | (-0.25, | 0.761  |
|                | 1.98)  | 1.43)   | 0.07)   |        | 7.88)   | 6.65)    | 0.23)   |        | 22.58)  | 19.99)  | 0.09)   |        | 0.91)  | 0.50)  | 0.18)   |        |
|                | 10.97  | 16.76   | 1.47    |        | 84.39   | 132.33   | 1.56    |        | 5.33    | 6.38    | 0.56    |        | 0.09   | 0.11   | 0.62    |        |
| Albania        | (8.63, | (13.34, | (1.42,  | <0.001 | (77.52, | (122.28, | (1.45,  | <0.001 | (3.75,  | (4.36,  | (0.16,  | 0.006  | (0.00, | (0.00, | (0.20,  | 0.003  |
|                | 13.78) | 20.80)  | 1.52)   |        | 91.72)  | 143.01)  | 1.67)   |        | 7.38)   | 9.06)   | 0.97)   |        | 0.77)  | 1.03)  | 1.03)   |        |
|                | 1.77   | 1.79    | 0.04    |        | 11.53   | 11.54    | 0.04    |        | 26.17   | 18.69   | -1.16   |        | 0.43   | 0.31   | -1.04   |        |
| Algeria        | (1.39, | (1.53,  | (-0.07, | 0.467  | (10.50, | (10.87,  | (-0.61, | 0.914  | (24.75, | (17.79, | (-1.49, | <0.001 | (0.26, | (0.20, | (-1.38, | <0.001 |
|                | 2.21)  | 2.09)   | 0.16)   |        | 12.64)  | 12.24)   | 0.69)   |        | 27.65)  | 19.63)  | -0.84)  |        | 0.67)  | 0.45)  | -0.69)  |        |
| American Samoa | 2.96   | 3.27    | 0.18    | 0.287  | 16.86   | 20.21    | 0.48    | 0.045  | 38.18   | 33.41   | -0.33   | 0.153  | 0.61   | 0.53   | -0.34   | 0.126  |

|                     |                |                |               |        |                |                  |               |        |                 |                |                     |        |               |               |                |        |
|---------------------|----------------|----------------|---------------|--------|----------------|------------------|---------------|--------|-----------------|----------------|---------------------|--------|---------------|---------------|----------------|--------|
|                     | (0.00, 50.90)  | (0.00, 53.79)  | (-0.15, 0.52) |        | (1.16, 75.24)  | (1.78, 83.24)    | (0.01, 0.96)  |        | (10.17, 104.35) | (8.21, 98.17)  | (-0.77, 0.12)       |        | (0.00, 46.47) | (0.00, 48.66) | (-0.77, 0.10)  |        |
|                     | 0.78           | 1.80           | 2.92          |        | 2.62           | 9.51             | 4.43          |        | 6.88            | 5.53           | -0.75               |        | 0.12          | 0.10          | -0.62          |        |
| Andorra             | (0.00, 40.36)  | (0.00, 40.42)  | (2.81, 3.03)  | <0.001 | (0.00, 43.15)  | (0.79, 51.04)    | (2.57, 6.34)  | <0.001 | (0.15, 49.81)   | (0.06, 46.27)  | (-0.86, -0.64)      | <0.001 | (0.00, 39.34) | (0.00, 37.68) | (-0.62, -0.62) | <0.001 |
|                     | 0.77           | 0.80           | 0.13          |        | 2.32           | 2.39             | 0.05          |        | 13.82           | 12.10          | -0.43               |        | 0.23          | 0.20          | -0.54          |        |
| Angola              | (0.42, 1.31)   | (0.57, 1.11)   | (0.05, 0.22)  | 0.002  | (1.63, 3.20)   | (1.93, 2.92)     | (-0.27, 0.36) | 0.778  | (12.19, 15.62)  | (11.14, 13.13) | (-1.20, 0.35)       | 0.284  | (0.07, 0.60)  | (0.10, 0.39)  | (-1.02, -0.05) | 0.031  |
|                     | 1.96           | 2.38           | 0.59          |        | 11.52          | 11.69            | -0.30         |        | 26.14           | 20.38          | -0.67               |        | 0.44          | 0.34          | -0.64          |        |
| Antigua and Barbuda | (0.00, 38.82)  | (0.00, 27.62)  | (0.36, 0.83)  | <0.001 | (0.61, 55.64)  | (1.46, 43.07)    | (-0.79, 0.18) | 0.221  | (5.68, 77.35)   | (4.94, 56.29)  | (-2.51, 1.21)       | 0.483  | (0.00, 35.98) | (0.00, 23.81) | (-2.57, 1.32)  | 0.519  |
|                     | 2.49           | 4.52           | 2.07          |        | 16.99          | 33.30            | 2.53          |        | 12.23           | 10.50          | -0.55               |        | 0.21          | 0.18          | -0.53          |        |
| Argentina           | (2.10, 2.93)   | (4.09, 4.99)   | (2.01, 2.13)  | <0.001 | (15.95, 18.08) | (32.10, 34.52)   | (2.41, 2.64)  | <0.001 | (11.36, 13.14)  | (9.83, 11.20)  | (-0.79, -0.31)      | <0.001 | (0.11, 0.36)  | (0.10, 0.29)  | (-0.86, -0.19) | 0.002  |
|                     | 11.26          | 13.55          | 0.65          |        | 88.57          | 106.53           | 0.64          |        | 3.82            | 5.21           | 1.12                |        | 0.06          | 0.09          | 1.45           |        |
| Armenia             | (8.93, 14.04)  | (10.77, 16.94) | (0.54, 0.75)  | <0.001 | (81.75, 95.83) | (98.66, 114.96)  | (0.52, 0.75)  | <0.001 | (2.52, 5.59)    | (3.54, 7.51)   | (0.26, 1.99)        | 0.010  | (0.00, 0.70)  | (0.00, 1.05)  | (0.35, 2.57)   | 0.010  |
|                     | 3.04           | 12.95          | 5.14          |        | 20.45          | 100.52           | 5.68          |        | 12.19           | 8.01           | -1.36               |        | 0.21          | 0.14          | -1.31          |        |
| Australia           | (2.49, 3.68)   | (11.91, 14.07) | (5.05, 5.24)  | <0.001 | (18.99, 22.00) | (97.64, 103.47)  | (5.36, 6.01)  | <0.001 | (11.06, 13.42)  | (7.20, 8.91)   | (-1.87, -0.84)      | <0.001 | (0.09, 0.43)  | (0.05, 0.31)  | (-2.26, -0.36) | 0.007  |
|                     | 5.20           | 9.04           | 1.95          |        | 38.70          | 71.42            | 2.19          |        | 18.76           | 14.37          | -0.91               |        | 0.31          | 0.24          | -0.91          |        |
| Austria             | (4.13, 6.48)   | (7.61, 10.70)  | (1.84, 2.07)  | <0.001 | (35.66, 41.95) | (67.36, 75.70)   | (1.92, 2.47)  | <0.001 | (16.65, 21.09)  | (12.50, 16.47) | (-1.29, -0.54)      | <0.001 | (0.10, 0.78)  | (0.06, 0.70)  | (-1.34, -0.48) | <0.001 |
|                     | 11.74          | 14.16          | 0.66          |        | 92.83          | 111.09           | 0.62          |        | 4.56            | 5.54           | 0.63                |        | 0.07          | 0.09          | 0.86           |        |
| Azerbaijan          | (10.03, 13.67) | (12.67, 15.80) | (0.61, 0.70)  | <0.001 | (87.80, 98.09) | (106.90, 115.41) | (0.48, 0.76)  | <0.001 | (3.54, 5.81)    | (4.59, 6.65)   | (-0.16, 1.43)       | 0.118  | (0.00, 0.44)  | (0.01, 0.37)  | (-0.49, 2.23)  | 0.212  |
|                     | 1.71           | 2.57           | 1.41          |        | 7.31           | 14.05            | 2.26          |        | 19.92           | 24.46          | 0.70                |        | 0.34          | 0.42          | 0.68           |        |
| Bahamas             | (0.03, 11.10)  | (0.29, 9.77)   | (1.34, 1.48)  | <0.001 | (1.80, 20.02)  | (6.86, 25.68)    | (1.11, 3.41)  | <0.001 | (9.90, 36.38)   | (14.52, 38.75) | (0.19, 1.22)        | 0.008  | (0.00, 8.74)  | (0.00, 6.14)  | (0.09, 1.27)   | 0.024  |
|                     | 3.06           | 3.81           | 0.76          |        | 19.89          | 26.83            | 1.00          |        | 13.91           | 14.02          | -0.00012            |        | 0.22          | 0.23          | 0.09           |        |
| Bahrain             | (1.03, 8.42)   | (2.09, 6.80)   | (0.71, 0.80)  | <0.001 | (14.08, 28.33) | (22.47, 32.17)   | (0.90, 1.09)  | <0.001 | (8.27, 22.62)   | (9.86, 19.51)  | (-0.55775, 0.56063) | 1.000  | (0.00, 4.72)  | (0.00, 2.21)  | (-0.66, 0.85)  | 0.808  |
|                     | 0.54           | 0.64           | 0.57          | <0.001 | —              | 1.84             | —             | —      | 9.05            | 10.50          | 0.56                | 0.079  | 0.15          | 0.18          | 0.52           | 0.216  |

|                          |                |                |               |        |                  |                  |               |              |                 |                |                |              |               |               |                |        |
|--------------------------|----------------|----------------|---------------|--------|------------------|------------------|---------------|--------------|-----------------|----------------|----------------|--------------|---------------|---------------|----------------|--------|
|                          | (0.44, 0.66)   | (0.56, 0.73)   | (0.49, 0.65)  |        | (1.69, 2.00)     |                  |               | (8.64, 9.47) | (10.15, 10.86)  | (-0.07, 1.19)  |                | (0.10, 0.22) | (0.13, 0.23)  | (-0.30, 1.35) |                |        |
|                          | 1.82           | 2.72           | 1.39          |        | 8.37             | 15.35            | 1.91          | 20.83        | 16.99           | -0.89          |                | 0.36         | 0.29          | -0.87         |                |        |
| Barbados                 | (0.04, 10.56)  | (0.16, 12.82)  | (1.32, 1.46)  | <0.001 | (2.46, 20.70)    | (6.63, 30.68)    | (1.42, 2.41)  | <0.001       | (10.47, 37.24)  | (7.53, 33.18)  | (-1.95, 0.18)  | 0.103        | (0.00, 7.91)  | (0.00, 8.58)  | (-1.86, 0.13)  | 0.089  |
|                          | 14.06          | 21.51          | 1.49          |        | 109.51           | 170.84           | 1.57          |              | 2.40            | 3.20           | 0.87           |              | 0.04          | 0.05          | 0.68           |        |
| Belarus                  | (12.49, 15.78) | (19.36, 23.87) | (1.40, 1.59)  | <0.001 | (105.12, 114.06) | (164.96, 176.91) | (1.48, 1.67)  | <0.001       | (1.77, 3.20)    | (2.40, 4.22)   | (0.04, 1.70)   | 0.040        | (0.00, 0.28)  | (0.00, 0.43)  | (-0.05, 1.42)  | 0.067  |
|                          | 0.36           | 0.67           | 2.16          |        |                  |                  |               |              | 9.67            | 6.16           | -1.65          |              | 0.17          | 0.11          | -1.44          |        |
| Belgium                  | (0.15, 0.76)   | (0.35, 1.18)   | (1.93, 2.38)  | <0.001 | —                | —                | —             | —            | (8.34, 11.18)   | (5.09, 7.41)   | (-2.11, -1.18) | <0.001       | (0.04, 0.50)  | (0.01, 0.42)  | (-1.88, -1.00) | <0.001 |
|                          | 1.57           | 3.07           | 2.10          |        | 7.25             | 16.46            | 2.89          |              | 17.70           | 24.43          | 1.02           |              | 0.29          | 0.41          | 1.09           |        |
| Belize                   | (0.00, 17.03)  | (0.51, 10.05)  | (1.57, 2.63)  | <0.001 | (0.88, 26.79)    | (8.67, 28.39)    | (2.39, 3.40)  | <0.001       | (6.52, 40.32)   | (15.01, 37.75) | (0.17, 1.87)   | 0.018        | (0.00, 14.78) | (0.00, 5.68)  | (-0.59, 2.80)  | 0.204  |
|                          | 0.98           | 1.03           | 0.15          |        | 4.84             | 5.02             | 0.01          |              | 10.53           | 10.34          | -0.05          |              | 0.18          | 0.17          | -0.09          |        |
| Benin                    | (0.38, 2.10)   | (0.64, 1.60)   | (0.06, 0.24)  | 0.001  | (3.26, 6.93)     | (4.03, 6.18)     | (-0.18, 0.21) | 0.887        | (8.28, 13.23)   | (9.02, 11.82)  | (-0.24, 0.13)  | 0.566        | (0.01, 0.93)  | (0.04, 0.49)  | (-0.41, 0.22)  | 0.567  |
|                          | 4.13           | 5.66           | 1.05          |        | 25.05            | 37.83            | 1.37          |              | 65.27           | 35.47          | -2.09          |              | 1.10          | 0.60          | -2.08          |        |
| Bermuda                  | (0.01, 46.31)  | (0.01, 61.48)  | (0.87, 1.22)  | <0.001 | (6.29, 76.04)    | (10.58, 106.87)  | (0.84, 1.89)  | <0.001       | (29.04, 131.98) | (7.87, 107.40) | (-2.67, -1.50) | <0.001       | (0.00, 41.63) | (0.00, 53.22) | (-2.76, -1.40) | <0.001 |
|                          | 0.57           | 0.82           | 1.25          |        |                  | 1.96             |               |              | 5.44            | 6.30           | 0.50           |              | 0.09          | 0.11          | 0.62           |        |
| Bhutan                   | (0.00, 4.99)   | (0.06, 3.68)   | (1.10, 1.40)  | <0.001 | —                | (0.47, 5.46)     | —             | —            | (2.09, 12.00)   | (3.21, 11.23)  | (0.43, 0.58)   | <0.001       | (0.00, 4.17)  | (0.00, 2.46)  | (0.62, 0.62)   | <0.001 |
| Bolivia                  | 0.57           | 0.88           | 1.50          |        |                  |                  |               |              | 12.52           | 10.04          | -0.74          |              | 0.20          | 0.16          | -0.78          |        |
| (Plurinational State of) | (0.21, 1.24)   | (0.54, 1.35)   | (1.36, 1.64)  | <0.001 | —                | —                | —             | —            | (10.58, 14.73)  | (8.81, 11.38)  | (-0.88, -0.59) | <0.001       | (0.03, 0.71)  | (0.04, 0.43)  | (-1.02, -0.54) | <0.001 |
|                          | 11.41          | 18.08          | 1.60          |        | 86.77            | 143.53           | 1.71          |              | 12.07           | 13.14          | 0.22           |              | 0.21          | 0.22          | 0.16           |        |
| Bosnia and Herzegovina   | (9.43, 13.70)  | (14.71, 22.04) | (1.49, 1.71)  | <0.001 | (81.14, 92.69)   | (133.90, 153.73) | (1.62, 1.80)  | <0.001       | (10.01, 14.43)  | (10.25, 16.64) | (-0.38, 0.82)  | 0.478        | (0.03, 0.75)  | (0.01, 1.21)  | (-0.58, 0.90)  | 0.679  |
|                          | 1.14           | 1.25           | 0.25          |        | 5.43             | 5.42             | -0.06         |              | 23.10           | 18.94          | -0.68          |              | 0.38          | 0.32          | -0.61          |        |
| Botswana                 | (0.16, 4.09)   | (0.49, 2.64)   | (-0.01, 0.51) | 0.063  | (2.55, 10.20)    | (3.66, 7.77)     | (-0.51, 0.39) | 0.796        | (17.16, 30.63)  | (15.40, 23.06) | (-0.89, -0.46) | <0.001       | (0.00, 2.86)  | (0.03, 1.30)  | (-1.06, -0.16) | 0.008  |
| Brazil                   | 1.36           | 1.48           | 0.27          | 0.001  | 2.75             | 4.25             | 1.21          | <0.001       | 38.03           | 16.77          | -2.75          | <0.001       | 0.64          | 0.28          | -2.79          | <0.001 |

|                          |         |         |         |        |          |          |         |        |         |         |         |        |        |        |         |        |
|--------------------------|---------|---------|---------|--------|----------|----------|---------|--------|---------|---------|---------|--------|--------|--------|---------|--------|
|                          | (1.22,  | (1.37,  | (0.11,  |        | (2.55,   | (4.06,   | (0.83,  |        | (37.33, | (16.39, | (-3.17, |        | (0.55, | (0.24, | (-3.21, |        |
|                          | 1.50)   | 1.60)   | 0.44)   |        | 2.96)    | 4.44)    | 1.59)   |        | 38.74)  | 17.16)  | -2.34)  |        | 0.74)  | 0.34)  | -2.37)  |        |
|                          | 34.14   | 38.07   | 0.38    |        | 271.34   | 305.83   | 0.42    |        | 16.16   | 13.04   | -0.72   |        | 0.26   | 0.22   | -0.65   |        |
| Brunei Darussalam        | (21.64, | (27.64, | (0.36,  | <0.001 | (233.39, | (275.21, | (0.37,  | <0.001 | (7.97,  | (7.28,  | (-1.37, | 0.032  | (0.00, | (0.00, | (-1.62, | 0.192  |
|                          | 51.62)  | 51.50)  | 0.40)   |        | 314.00)  | 339.26)  | 0.46)   |        | 29.54)  | 21.97)  | -0.06)  |        | 6.92)  | 4.57)  | 0.33)   |        |
|                          | 13.46   | 21.17   | 1.57    |        | 104.56   | 167.32   | 1.62    |        | 12.18   | 16.46   | 1.14    |        | 0.20   | 0.27   | 1.34    |        |
| Bulgaria                 | (11.69, | (18.55, | (1.54,  | <0.001 | (99.58,  | (160.13, | (1.55,  | <0.001 | (10.47, | (13.99, | (-0.07, | 0.066  | (0.04, | (0.05, | (-0.14, | 0.077  |
|                          | 15.43)  | 24.11)  | 1.60)   |        | 109.74)  | 174.80)  | 1.70)   |        | 14.08)  | 19.28)  | 2.37)   |        | 0.59)  | 0.91)  | 2.85)   |        |
|                          | 0.81    | 0.99    | 0.64    |        | 2.40     | 4.87     | 2.22    |        | 7.54    | 9.08    | 0.73    |        | 0.13   | 0.15   | 0.65    |        |
| Burkina Faso             | (0.38,  | (0.69,  | (0.49,  | <0.001 | (1.54,   | (4.13,   | (1.55,  | <0.001 | (6.09,  | (8.13,  | (0.45,  | <0.001 | (0.01, | (0.05, | (0.40,  | <0.001 |
|                          | 1.54)   | 1.39)   | 0.78)   |        | 3.57)    | 5.71)    | 2.90)   |        | 9.26)   | 10.12)  | 1.01)   |        | 0.58)  | 0.36)  | 0.90)   |        |
|                          | 0.73    | 0.54    | -1.05   |        | 2.05     |          |         |        | 23.07   | 13.22   | -1.92   |        | 0.38   | 0.22   | -1.94   |        |
| Burundi                  | (0.28,  | (0.27,  | (-1.17, | <0.001 | (1.16,   | —        | —       | —      | (20.13, | (11.73, | (-2.17, | <0.001 | (0.09, | (0.07, | (-2.19, | <0.001 |
|                          | 1.58)   | 0.97)   | -0.92)  |        | 3.36)    |          |         |        | 26.35)  | 14.85)  | -1.66)  |        | 1.08)  | 0.54)  | -1.69)  |        |
|                          | 1.26    | 1.37    | 0.27    |        | 5.89     | 6.41     | 0.12    |        | 12.15   | 9.67    | -0.83   |        | 0.21   | 0.16   | -1.04   |        |
| Cabo Verde               | (0.00,  | (0.14,  | (0.11,  | 0.001  | (0.74,   | (2.85,   | (-0.07, | 0.219  | (4.21,  | (5.04,  | (-1.16, | <0.001 | (0.00, | (0.00, | (-1.40, | <0.001 |
|                          | 14.17)  | 5.53)   | 0.42)   |        | 22.03)   | 12.60)   | 0.30)   |        | 29.62)  | 16.91)  | -0.50)  |        | 12.52) | 3.51)  | -0.69)  |        |
|                          | 0.77    | 0.93    | 0.65    |        | 2.68     | 5.31     | 2.51    |        | 3.16    | 2.55    | -0.72   |        | 0.05   | 0.04   | -0.75   |        |
| Cambodia                 | (0.39,  | (0.64,  | (0.53,  | <0.001 | (1.83,   | (4.56,   | (1.75,  | <0.001 | (2.33,  | (2.05,  | (-0.83, | <0.001 | (0.00, | (0.00, | (-0.75, | <0.001 |
|                          | 1.39)   | 1.31)   | 0.78)   |        | 3.81)    | 6.15)    | 3.29)   |        | 4.23)   | 3.14)   | -0.61)  |        | 0.41)  | 0.19)  | -0.75)  |        |
|                          | 1.11    | 1.20    | 0.20    |        | 5.39     | 5.49     | -0.05   |        | 9.59    | 11.92   | 0.74    |        | 0.16   | 0.20   | 0.64    |        |
| Cameroon                 | (0.65,  | (0.92,  | (0.04,  | 0.017  | (4.24,   | (4.85,   | (-0.21, | 0.503  | (8.14,  | (11.02, | (0.61,  | <0.001 | (0.03, | (0.10, | (0.48,  | <0.001 |
|                          | 1.79)   | 1.54)   | 0.36)   |        | 6.75)    | 6.20)    | 0.10)   |        | 11.24)  | 12.87)  | 0.87)   |        | 0.54)  | 0.37)  | 0.79)   |        |
|                          | 15.29   | 17.09   | 0.39    |        | 120.68   | 134.44   | 0.40    |        | 10.36   | 7.89    | -0.94   |        | 0.18   | 0.13   | -0.87   |        |
| Canada                   | (14.31, | (16.07, | (0.37,  | <0.001 | (117.95, | (131.60, | (0.34,  | <0.001 | (9.55,  | (7.20,  | (-1.61, | 0.006  | (0.09, | (0.06, | (-1.96, | 0.119  |
|                          | 16.32)  | 18.16)  | 0.41)   |        | 123.46)  | 137.33)  | 0.46)   |        | 11.22)  | 8.64)   | -0.26)  |        | 0.33)  | 0.27)  | 0.23)   |        |
|                          | 0.60    | 0.56    | -0.26   |        |          |          |         |        | 14.85   | 11.84   | -0.84   |        | 0.24   | 0.20   | -0.69   |        |
| Central African Republic | (0.11,  | (0.18,  | (-0.38, | <0.001 | —        | —        | —       | —      | (11.59, | (9.75,  | (-1.24, | <0.001 | (0.01, | (0.02, | (-0.95, | <0.001 |
|                          | 1.99)   | 1.35)   | -0.13)  |        |          |          |         |        | 18.82)  | 14.27)  | -0.44)  |        | 1.43)  | 0.80)  | -0.42)  |        |
|                          | 0.84    | 1.04    | 0.72    |        | 2.49     | 5.23     | 2.52    |        | 8.40    | 10.07   | 0.71    |        | 0.14   | 0.17   | 0.83    |        |
| Chad                     | (0.34,  | (0.65,  | (0.49,  | <0.001 | (1.48,   | (4.26,   | (1.48,  | <0.001 | (6.61,  | (8.84,  | (0.30,  | 0.001  | (0.01, | (0.05, | (0.56,  | <0.001 |
|                          | 1.76)   | 1.57)   | 0.95)   |        | 3.93)    | 6.37)    | 3.57)   |        | 10.56)  | 11.43)  | 1.13)   |        | 0.75)  | 0.46)  | 1.10)   |        |
|                          | 2.73    | 7.16    | 3.37    | <0.001 | 17.34    | 55.53    | 3.97    | <0.001 | 18.92   | 14.00   | -1.00   | <0.001 | 0.33   | 0.24   | -1.05   | 0.004  |

|               |                   |                   |                   |        |                     |                     |                   |        |                   |                   |                   |                 |                   |                   |                   |        |
|---------------|-------------------|-------------------|-------------------|--------|---------------------|---------------------|-------------------|--------|-------------------|-------------------|-------------------|-----------------|-------------------|-------------------|-------------------|--------|
|               | (2.14,<br>3.44)   | (6.31,<br>8.11)   | (3.26,<br>3.48)   |        | (15.78,<br>19.03)   | (53.13,<br>58.02)   | (3.77,<br>4.17)   |        | (17.31,<br>20.65) | (12.79,<br>15.31) | (-1.47,<br>-0.53) | (0.15,<br>0.64) | (0.11,<br>0.48)   | (-1.76,<br>-0.35) |                   |        |
|               | 2.84              | 3.47              | 0.67              |        | 20.98               | 23.85               | 0.42              |        | 5.88              | 3.85              | -1.47             | 0.10            | 0.07              | -1.23             |                   |        |
| China         | (2.77,<br>2.90)   | (3.40,<br>3.54)   | (0.57,<br>0.78)   | <0.001 | (20.80,<br>21.16)   | (23.67,<br>24.03)   | (0.21,<br>0.62)   | <0.001 | (5.79,<br>5.97)   | (3.78,<br>3.93)   | (-1.94,<br>-1.00) | <0.001          | (0.09,<br>0.11)   | (0.06,<br>0.08)   | (-1.98,<br>-0.48) | 0.001  |
|               | 0.75              | 1.13              | 1.39              |        |                     | 1.93                |                   |        | 26.70             | 18.04             | -1.47             | 0.45            | 0.31              | -1.43             |                   |        |
| Colombia      | (0.55,<br>1.00)   | (0.93,<br>1.37)   | (1.24,<br>1.54)   | <0.001 | —                   | (1.66,<br>2.24)     | —                 | —      | (25.45,<br>27.99) | (17.20,<br>18.92) | (-2.50,<br>-0.43) | 0.006           | (0.30,<br>0.66)   | (0.21,<br>0.44)   | (-2.41,<br>-0.44) | 0.005  |
|               | 0.98              | 0.74              | -0.98             |        | 4.79                | 2.12                | -2.98             |        | 16.33             | 11.43             | -1.23             | 0.27            | 0.19              | -1.21             |                   |        |
| Comoros       | (0.00,<br>8.40)   | (0.02,<br>4.16)   | (-1.17,<br>-0.80) | <0.001 | (0.90,<br>14.73)    | (0.40,<br>6.45)     | (-4.13,<br>-1.81) | <0.001 | (8.41,<br>29.33)  | (6.61,<br>18.53)  | (-3.90,<br>1.51)  | 0.376           | (0.00,<br>7.16)   | (0.00,<br>3.19)   | (-3.72,<br>1.37)  | 0.356  |
|               | 0.89              | 0.76              | -0.59             |        | 2.74                | 2.33                | -0.60             |        | 17.69             | 10.67             | -1.63             | 0.30            | 0.18              | -1.79             |                   |        |
| Congo         | (0.21,<br>2.56)   | (0.32,<br>1.54)   | (-0.85,<br>-0.33) | <0.001 | (1.24,<br>5.26)     | (1.47,<br>3.50)     | (-0.94,<br>-0.27) | <0.001 | (13.89,<br>22.31) | (8.75,<br>12.90)  | (-2.06,<br>-1.20) | <0.001          | (0.01,<br>1.65)   | (0.02,<br>0.70)   | (-2.60,<br>-0.98) | <0.001 |
|               | 1.95              | 2.74              | 1.15              |        | 13.05               | 16.41               | 0.74              |        | 11.61             | 10.96             | -0.20             | 0.19            | 0.18              | -0.06             |                   |        |
| Cook Islands  | (0.00,<br>124.75) | (0.00,<br>149.39) | (1.03,<br>1.27)   | <0.001 | (0.01,<br>145.09)   | (0.01,<br>175.98)   | (-0.12,<br>1.60)  | 0.093  | (0.01,<br>140.85) | (0.00,<br>165.10) | (-0.31,<br>-0.09) | <0.001          | (0.00,<br>121.49) | (0.00,<br>144.22) | (-0.42,<br>0.30)  | 0.739  |
|               | 0.75              | 1.57              | 2.55              |        |                     | 7.48                |                   |        | 13.56             | 20.11             | 1.67              | 0.23            | 0.34              | 1.64              |                   |        |
| Costa Rica    | (0.23,<br>1.89)   | (0.88,<br>2.61)   | (2.40,<br>2.70)   | <0.001 | —                   | (5.85,<br>9.45)     | —                 | —      | (10.78,<br>16.88) | (17.35,<br>23.21) | (1.29,<br>2.05)   | <0.001          | (0.01,<br>1.11)   | (0.08,<br>1.00)   | (1.23,<br>2.05)   | <0.001 |
|               | 1.15              | 1.16              | 0.00              |        | 5.97                | 5.79                | -0.20             |        | 10.28             | 10.34             | 0.02              | 0.17            | 0.17              | 0.05              |                   |        |
| Cote d'Ivoire | (0.74,<br>1.71)   | (0.89,<br>1.50)   | (-0.13,<br>0.14)  | 0.953  | (4.93,<br>7.18)     | (5.14,<br>6.50)     | (-0.27,<br>-0.14) | <0.001 | (9.00,<br>11.71)  | (9.49,<br>11.24)  | (-0.19,<br>0.23)  | 0.872           | (0.04,<br>0.47)   | (0.08,<br>0.33)   | (-0.31,<br>0.42)  | 0.781  |
|               | 15.69             | 29.13             | 2.16              |        | 121.97              | 231.09              | 2.24              |        | 11.53             | 11.28             | -0.07             | 0.20            | 0.19              | -0.20             |                   |        |
| Croatia       | (13.31,<br>18.41) | (25.30,<br>33.45) | (2.05,<br>2.28)   | <0.001 | (115.28,<br>128.97) | (220.36,<br>242.27) | (2.05,<br>2.42)   | <0.001 | (9.50,<br>13.90)  | (8.94,<br>14.12)  | (-1.10,<br>0.97)  | 0.892           | (0.02,<br>0.79)   | (0.01,<br>1.04)   | (-1.81,<br>1.43)  | 0.805  |
|               | 1.52              | 2.54              | 1.80              |        | 6.35                | 14.53               | 2.85              |        | 25.23             | 17.31             | -1.29             | 0.43            | 0.29              | -1.42             |                   |        |
| Cuba          | (1.05,<br>2.14)   | (1.88,<br>3.38)   | (1.67,<br>1.92)   | <0.001 | (5.28,<br>7.57)     | (12.89,<br>16.32)   | (2.53,<br>3.18)   | <0.001 | (23.22,<br>27.38) | (15.49,<br>19.29) | (-1.73,<br>-0.86) | <0.001          | (0.20,<br>0.80)   | (0.10,<br>0.68)   | (-1.80,<br>-1.05) | <0.001 |
|               | 0.19              | 0.77              | 5.05              |        |                     | 2.37                |                   |        | 8.28              | 7.29              | -0.37             | 0.14            | 0.13              | -0.32             |                   |        |
| Cyprus        | (0.00,<br>2.92)   | (0.11,<br>3.46)   | (4.77,<br>5.33)   | <0.001 | —                   | (1.00,<br>5.45)     | —                 | —      | (4.44,<br>14.21)  | (4.45,<br>11.74)  | (-0.73,<br>-0.01) | 0.047           | (0.00,<br>2.83)   | (0.00,<br>2.57)   | (-0.86,<br>0.23)  | 0.251  |
|               | 13.91             | 25.36             | 2.11              | <0.001 | 107.80              | 200.56              | 2.20              | <0.001 | 10.28             | 16.88             | 1.81              | <0.001          | 0.17              | 0.29              | 2.02              | <0.001 |

|                                        |                          |                          |                            |        |                          |                            |                            |        |                            |                            |                            |                 |                         |                            |                           |        |
|----------------------------------------|--------------------------|--------------------------|----------------------------|--------|--------------------------|----------------------------|----------------------------|--------|----------------------------|----------------------------|----------------------------|-----------------|-------------------------|----------------------------|---------------------------|--------|
|                                        | (12.29,<br>15.69)        | (23.03,<br>27.90)        | (2.04,<br>2.18)            |        | (103.29,<br>112.47)      | (194.20,<br>207.11)        | (2.01,<br>2.39)            |        | (8.88,<br>11.84)           | (14.96,<br>19.02)          | (1.11,<br>2.51)            | (0.04,<br>0.50) | (0.09,<br>0.74)         | (1.54,<br>2.49)            |                           |        |
| Democratic                             | 2.37                     | 2.13                     | -0.38                      |        | 17.18                    | 15.08                      | -0.46                      |        | 7.57                       | 6.11                       | -0.75                      | 0.13            | 0.10                    | -0.95                      |                           |        |
| People's Republic<br>of Korea          | (1.91,<br>2.92)          | (1.76,<br>2.55)          | (-0.41,<br>-0.34)          | <0.001 | (15.87,<br>18.57)        | (14.10,<br>16.12)          | (-0.65,<br>-0.28)          | <0.001 | (6.73,<br>8.50)            | (5.47,<br>6.81)            | (-0.81,<br>-0.69)          | <0.001          | (0.04,<br>0.31)         | (0.04,<br>0.24)            | (-1.13,<br>-0.77)         | <0.001 |
| Democratic<br>Republic of the<br>Congo | 0.64<br>(0.45,<br>0.88)  | 0.59<br>(0.47,<br>0.72)  | -0.33<br>(-0.59,<br>-0.07) | 0.012  | 1.88<br>(1.52,<br>2.30)  | —<br>—                     | —<br>—                     | —<br>— | 11.58<br>(10.76,<br>12.45) | 9.76<br>(9.29,<br>10.26)   | -0.65<br>(-0.80,<br>-0.49) | 0.20<br><0.001  | 0.17<br>(0.10,<br>0.11) | -0.56<br>(-0.77,<br>-0.35) | <0.001                    |        |
| Denmark                                | 0.34<br>(0.08,<br>0.97)  | 1.11<br>(0.54,<br>2.05)  | 4.17<br>(3.63,<br>4.72)    | <0.001 | —<br>—                   | 5.18<br>(3.82,<br>6.89)    | —<br>—                     | —<br>— | 7.89<br>(6.26,<br>9.85)    | 5.93<br>(4.47,<br>7.73)    | -0.92<br>(-1.56,<br>-0.27) | 0.14<br>0.006   | 0.11<br>(0.01,<br>0.00) | -0.70<br>(-1.46,<br>0.06)  | 0.070                     |        |
| Djibouti                               | 1.00<br>(0.02,<br>6.62)  | 0.81<br>(0.11,<br>2.86)  | -0.78<br>(-0.93,<br>-0.63) | <0.001 | 5.05<br>(1.37,<br>13.06) | 2.40<br>(0.89,<br>5.19)    | -2.67<br>(-3.45,<br>-1.89) | <0.001 | 19.23<br>(11.54,<br>30.56) | 14.22<br>(10.02,<br>19.60) | -0.95<br>(-1.46,<br>-0.44) | 0.32<br><0.001  | 0.24<br>(0.00,<br>0.00) | -0.91<br>(-1.45,<br>-0.37) | 0.001                     |        |
| Dominica                               | 1.82<br>(0.00,<br>34.79) | 2.48<br>(0.00,<br>33.69) | 1.02<br>(0.80,<br>1.25)    | <0.001 | 7.97<br>(0.18,<br>46.20) | 13.46<br>(1.30,<br>52.77)  | 1.44<br>(-0.02,<br>2.92)   | 0.053  | 31.19<br>(9.08,<br>79.93)  | 28.44<br>(7.28,<br>75.47)  | -0.30<br>(-0.45,<br>-0.15) | <0.001          | 0.53<br>(0.00,<br>0.00) | 0.49<br>(0.00,<br>29.77)   | -0.27<br>(-0.67,<br>0.13) | 0.181  |
| Dominican<br>Republic                  | 1.15<br>(0.64,<br>1.93)  | 1.79<br>(1.28,<br>2.44)  | 1.54<br>(1.45,<br>1.64)    | <0.001 | 5.07<br>(3.85,<br>6.57)  | 8.19<br>(7.03,<br>9.48)    | 1.53<br>(1.09,<br>1.97)    | <0.001 | 24.47<br>(21.94,<br>27.24) | 19.77<br>(17.98,<br>21.69) | -0.70<br>(-1.16,<br>-0.24) | 0.40<br>0.003   | 0.33<br>(0.14,<br>0.14) | -0.59<br>(-1.06,<br>-0.13) | 0.012                     |        |
| Ecuador                                | 0.72<br>(0.38,<br>1.25)  | 3.55<br>(2.95,<br>4.24)  | 5.72<br>(5.38,<br>6.07)    | <0.001 | —<br>—                   | 22.74<br>(21.15,<br>24.42) | —<br>—                     | —<br>— | 15.45<br>(13.76,<br>17.29) | 18.71<br>(17.33,<br>20.18) | 0.57<br>(0.17,<br>0.98)    | 0.25<br>0.006   | 0.30<br>(0.08,<br>0.15) | 0.55<br>(-0.06,<br>1.17)   | 0.076                     |        |
| Egypt                                  | 1.72<br>(1.47,<br>2.00)  | 2.09<br>(1.90,<br>2.29)  | 0.72<br>(0.59,<br>0.84)    | <0.001 | 8.33<br>(7.76,<br>8.94)  | 9.28<br>(8.87,<br>9.71)    | 0.36<br>(-0.24,<br>0.95)   | 0.239  | 40.96<br>(39.78,<br>42.16) | 37.65<br>(36.83,<br>38.49) | -0.29<br>(-0.60,<br>0.02)  | 0.66<br>0.066   | 0.61<br>(0.52,<br>0.51) | -0.28<br>(-0.64,<br>0.07)  | 0.116                     |        |
| El Salvador                            | 0.45<br>(0.12,<br>1.24)  | 0.89<br>(0.43,<br>1.67)  | 2.43<br>(2.35,<br>2.51)    | <0.001 | —<br>—                   | —<br>—                     | —<br>—                     | —<br>— | 7.09<br>(5.46,<br>9.11)    | 6.65<br>(5.23,<br>8.35)    | -0.23<br>(-1.11,<br>0.66)  | 0.12<br>0.616   | 0.11<br>(0.00,<br>0.01) | -0.28<br>(-1.44,<br>0.88)  | 0.633                     |        |
| Equatorial Guinea                      | 0.69<br>(0.00,<br>8.63)  | 1.02<br>(0.21,<br>3.27)  | 1.36<br>(1.17,<br>1.55)    | <0.001 | 1.96<br>(0.06,<br>10.90) | 5.24<br>(2.76,<br>9.09)    | 3.70<br>(2.23,<br>5.20)    | <0.001 | 14.77<br>(6.90,<br>28.43)  | 9.12<br>(6.05,<br>13.38)   | -1.67<br>(-1.98,<br>-1.37) | 0.24<br><0.001  | 0.15<br>(0.00,<br>0.00) | -1.61<br>(-2.20,<br>-1.02) | <0.001                    |        |
| Eritrea                                | 0.77                     | 0.65                     | -0.62                      | <0.001 | 2.13                     | 1.91                       | -0.50                      | 0.001  | 19.91                      | 16.69                      | -0.56                      | <0.001          | 0.33                    | 0.28                       | -0.49                     | 0.003  |

|          |                |                |                |        |                  |                  |                |        |                |                |                |              |              |                |
|----------|----------------|----------------|----------------|--------|------------------|------------------|----------------|--------|----------------|----------------|----------------|--------------|--------------|----------------|
|          | (0.20, 2.13)   | (0.29, 1.28)   | (-0.78, -0.45) |        | (0.95, 4.12)     | (1.20, 2.90)     | (-0.80, -0.21) |        | (16.29, 24.18) | (14.60, 19.01) | (-0.82, -0.30) | (0.03, 1.46) | (0.07, 0.76) | (-0.81, -0.17) |
|          | 17.37          | 30.47          | 1.96           |        | 136.28           | 241.81           | 2.00           |        | 6.12           | 11.74          | 2.10           | 0.10         | 0.20         | 2.13           |
| Estonia  | (12.96, 22.85) | (23.73, 38.88) | (1.89, 2.02)   | <0.001 | (123.51, 150.08) | (222.79, 262.34) | (1.84, 2.16)   | <0.001 | (3.61, 9.77)   | (7.62, 17.65)  | (1.41, 2.80)   | (0.00, 1.61) | (0.00, 2.87) | (1.50, 2.76)   |
|          | 0.99           | 1.46           | 1.35           |        | 2.71             | 5.19             | 2.69           |        | 15.45          | 20.12          | 0.87           | 0.26         | 0.33         | 0.79           |
| Eswatini | (0.03, 5.77)   | (0.33, 4.20)   | (1.08, 1.62)   | <0.001 | (0.44, 8.73)     | (2.58, 9.35)     | (1.81, 3.57)   | <0.001 | (9.22, 24.71)  | (14.81, 26.81) | (0.70, 1.05)   | (0.00, 4.50) | (0.00, 2.42) | (0.41, 1.16)   |
|          | 0.59           | 0.63           | 0.21           |        |                  | 0.13             |                |        | 15.20          | 8.89           | -1.83          | 0.25         | 0.15         | -1.82          |
| Ethiopia | (0.43, 0.80)   | (0.52, 0.76)   | (0.07, 0.34)   | 0.003  | —                | (0.08, 0.20)     | —              | —      | (14.36, 16.07) | (8.48, 9.32)   | (-1.99, -1.67) | (0.16, 0.40) | (0.10, 0.22) | (-2.40, -1.24) |
|          | 1.54           | 1.77           | 0.47           |        | 8.75             | 9.20             | 0.18           |        | 13.80          | 12.61          | -0.27          | 0.22         | 0.20         | -0.24          |
| Fiji     | (0.24, 5.28)   | (0.40, 5.00)   | (0.43, 0.52)   | <0.001 | (4.59, 15.17)    | (5.40, 14.70)    | (0.00, 0.36)   | 0.048  | (8.72, 20.96)  | (8.00, 18.94)  | (-0.88, 0.35)  | (0.00, 3.11) | (0.00, 2.46) | (-1.02, 0.56)  |
|          | 1.71           | 4.55           | 3.49           |        | 11.59            | 33.57            | 3.74           |        | 14.01          | 9.48           | -1.46          | 0.25         | 0.17         | -1.44          |
| Finland  | (1.00, 2.80)   | (3.28, 6.20)   | (3.22, 3.75)   | <0.001 | (9.64, 13.88)    | (30.03, 37.46)   | (3.22, 4.27)   | <0.001 | (11.79, 16.57) | (7.61, 11.72)  | (-2.15, -0.76) | (0.04, 0.89) | (0.01, 0.80) | (-2.29, -0.57) |
|          | 0.63           | 1.08           | 1.85           |        | 1.95             | 2.22             | -0.04          |        | 17.39          | 7.26           | -2.95          | 0.30         | 0.12         | -3.13          |
| France   | (0.49, 0.79)   | (0.89, 1.30)   | (1.69, 2.01)   | <0.001 | (1.71, 2.21)     | (1.95, 2.51)     | (-2.61, 2.60)  | 0.975  | (16.63, 18.18) | (6.74, 7.81)   | (-3.66, -2.23) | (0.21, 0.42) | (0.06, 0.21) | (-4.22, -2.03) |
|          | 1.08           | 1.24           | 0.47           |        | 5.60             | 4.98             | -0.44          |        | 16.36          | 12.67          | -0.99          | 0.27         | 0.21         | -0.96          |
| Gabon    | (0.12, 4.14)   | (0.35, 3.20)   | (0.35, 0.59)   | <0.001 | (2.59, 10.57)    | (2.82, 8.15)     | (-0.76, -0.12) | 0.007  | (11.06, 23.43) | (9.18, 17.10)  | (-1.58, -0.40) | (0.00, 2.79) | (0.00, 1.60) | (-1.37, -0.56) |
|          | 0.96           | 1.04           | 0.26           |        | 2.92             | 5.05             | 2.22           |        | 8.63           | 11.23          | 0.97           | 0.14         | 0.19         | 1.22           |
| Gambia   | (0.07, 4.48)   | (0.29, 2.74)   | (0.13, 0.38)   | <0.001 | (0.75, 7.70)     | (2.98, 8.04)     | (1.72, 2.73)   | <0.001 | (4.74, 14.71)  | (8.26, 15.00)  | (-0.35, 2.30)  | (0.00, 3.14) | (0.00, 1.42) | (0.32, 2.13)   |
|          | 12.51          | 19.14          | 1.51           |        | 96.51            | 151.27           | 1.58           |        | 4.64           | 18.50          | 4.99           | 0.08         | 0.31         | 4.94           |
| Georgia  | (10.47, 14.84) | (15.92, 22.88) | (1.36, 1.67)   | <0.001 | (90.68, 102.64)  | (142.15, 160.89) | (1.42, 1.73)   | <0.001 | (3.43, 6.15)   | (15.27, 22.28) | (3.84, 6.14)   | (0.00, 0.52) | (0.03, 1.26) | (3.49, 6.40)   |
|          | 0.44           | 1.36           | 4.08           |        |                  | 6.48             |                |        | 18.76          | 10.66          | -1.98          | 0.32         | 0.18         | -2.03          |
| Germany  | (0.35, 0.56)   | (1.18, 1.57)   | (3.66, 4.50)   | <0.001 | —                | (6.09, 6.90)     | —              | —      | (18.09, 19.46) | (10.13, 11.22) | (-2.71, -1.23) | (0.24, 0.43) | (0.12, 0.27) | (-2.84, -1.21) |
|          | 0.83           | 1.09           | 0.93           | <0.001 | 2.49             | 5.41             | 2.75           | <0.001 | 6.75           | 8.21           | 0.67           | 0.11         | 0.14         | 0.73           |
| Ghana    |                |                |                |        |                  |                  |                |        |                |                |                |              |              |                |

|               |                  |                  |                  |        |                    |                    |                  |        |                    |                   |                   |                 |                  |                  |                   |        |
|---------------|------------------|------------------|------------------|--------|--------------------|--------------------|------------------|--------|--------------------|-------------------|-------------------|-----------------|------------------|------------------|-------------------|--------|
|               | (0.50,<br>1.28)  | (0.84,<br>1.39)  | (0.81,<br>1.04)  |        | (1.87,<br>3.25)    | (4.81,<br>6.06)    | (1.95,<br>3.57)  |        | (5.79,<br>7.84)    | (7.51,<br>8.96)   | (0.37,<br>0.97)   | (0.02,<br>0.35) | (0.06,<br>0.27)  | (0.53,<br>0.93)  |                   |        |
|               | 0.56             | 1.45             | 3.31             |        |                    | 7.53               |                  |        | 12.32              | 12.93             | -0.01             | 0.21            | 0.22             | 0.09             |                   |        |
| Greece        | (0.28,<br>1.02)  | (0.92,<br>2.21)  | (3.13,<br>3.49)  | <0.001 | —                  | (6.34,<br>8.91)    | —                | —      | (10.79,<br>14.00)  | (11.17,<br>14.91) | (-0.81,<br>0.80)  | 0.977           | (0.06,<br>0.54)  | (0.05,<br>0.65)  | (-0.66,<br>0.85)  | 0.812  |
|               | 18.10            | 18.45            | 0.06             |        | 142.58             | 144.40             | 0.04             |        | 22.35              | 12.05             | -2.10             |                 | 0.39             | 0.21             | -2.12             |        |
| Greenland     | (3.35,<br>67.37) | (2.27,<br>74.35) | (-0.05,<br>0.17) | 0.304  | (89.12,<br>224.00) | (82.63,<br>239.63) | (-0.18,<br>0.27) | 0.704  | (5.08,<br>73.48)   | (0.64,<br>64.72)  | (-2.31,<br>-1.89) | <0.001          | (0.00,<br>42.30) | (0.00,<br>45.63) | (-2.29,<br>-1.96) | <0.001 |
|               | 2.10             | 2.93             | 1.09             |        | 12.06              | 17.83              | 1.21             |        | 42.27              | 36.43             | -0.59             |                 | 0.74             | 0.63             | -0.51             |        |
| Grenada       | (0.00,<br>31.93) | (0.01,<br>26.27) | (0.65,<br>1.53)  | <0.001 | (1.14,<br>48.98)   | (4.15,<br>50.16)   | (0.60,<br>1.83)  | <0.001 | (16.19,<br>91.68)  | (15.01,<br>75.23) | (-1.31,<br>0.14)  | 0.111           | (0.00,<br>29.47) | (0.00,<br>22.15) | (-1.29,<br>0.28)  | 0.202  |
|               | 2.67             | 3.74             | 1.15             |        | 16.57              | 23.29              | 1.10             |        | 35.60              | 44.20             | 0.74              |                 | 0.55             | 0.70             | 0.86              |        |
| Guam          | (0.05,<br>16.97) | (0.14,<br>19.81) | (1.07,<br>1.23)  | <0.001 | (5.73,<br>37.89)   | (9.21,<br>48.71)   | (0.73,<br>1.47)  | <0.001 | (18.33,<br>62.89)  | (24.13,<br>74.84) | (0.02,<br>1.47)   | 0.044           | (0.00,<br>13.27) | (0.00,<br>14.44) | (0.36,<br>1.37)   | 0.001  |
|               | 0.45             | 0.67             | 1.43             |        |                    |                    |                  |        | 6.59               | 6.56              | 0.00              |                 | 0.11             | 0.11             | 0.09              |        |
| Guatemala     | (0.15,<br>1.02)  | (0.43,<br>1.01)  | (1.31,<br>1.55)  | <0.001 | —                  | —                  | —                | —      | (5.25,<br>8.18)    | (5.74,<br>7.47)   | (-0.39,<br>0.39)  | 0.996           | (0.01,<br>0.53)  | (0.03,<br>0.30)  | (-0.86,<br>1.06)  | 0.850  |
|               | 0.95             | 1.18             | 0.69             |        | 2.85               | 5.87               | 2.07             |        | 9.23               | 11.63             | 0.85              |                 | 0.15             | 0.19             | 0.79              |        |
| Guinea        | (0.42,<br>1.86)  | (0.74,<br>1.79)  | (0.46,<br>0.92)  | <0.001 | (1.80,<br>4.29)    | (4.76,<br>7.16)    | (1.18,<br>2.96)  | <0.001 | (7.39,<br>11.42)   | (10.18,<br>13.23) | (0.71,<br>0.99)   | <0.001          | (0.01,<br>0.73)  | (0.05,<br>0.54)  | (0.49,<br>1.10)   | <0.001 |
|               | 1.10             | 1.13             | 0.04             |        | 5.27               | 5.41               | -0.12            |        | 11.78              | 12.68             | 0.26              |                 | 0.20             | 0.21             | 0.09              |        |
| Guinea-Bissau | (0.09,<br>4.86)  | (0.29,<br>3.09)  | (-0.09,<br>0.17) | 0.575  | (2.08,<br>11.06)   | (3.10,<br>8.79)    | (-0.40,<br>0.17) | 0.421  | (7.08,<br>18.72)   | (9.25,<br>17.06)  | (0.17,<br>0.34)   | <0.001          | (0.00,<br>3.35)  | (0.00,<br>1.68)  | (-0.13,<br>0.32)  | 0.417  |
|               | 2.09             | 2.77             | 0.94             |        | 9.03               | 14.24              | 1.12             |        | 93.14              | 67.42             | -1.23             |                 | 1.58             | 1.16             | -1.18             |        |
| Guyana        | (0.45,<br>6.24)  | (0.76,<br>7.22)  | (0.59,<br>1.29)  | <0.001 | (4.69,<br>15.77)   | (8.52,<br>22.32)   | (0.48,<br>1.77)  | 0.001  | (78.58,<br>109.79) | (54.80,<br>82.18) | (-2.36,<br>-0.08) | 0.036           | (0.25,<br>5.44)  | (0.10,<br>4.82)  | (-2.26,<br>-0.09) | 0.034  |
|               | 1.26             | 1.39             | 0.26             |        | 5.42               | 5.50               | -0.10            |        | 24.85              | 21.88             | -0.38             |                 | 0.42             | 0.38             | -0.31             |        |
| Haiti         | (0.67,<br>2.15)  | (0.96,<br>1.95)  | (0.04,<br>0.48)  | 0.022  | (4.07,<br>7.09)    | (4.59,<br>6.55)    | (-0.55,<br>0.36) | 0.682  | (21.96,<br>28.03)  | (20.06,<br>23.82) | (-0.67,<br>-0.10) | 0.009           | (0.13,<br>1.05)  | (0.17,<br>0.72)  | (-0.54,<br>-0.08) | 0.008  |
|               | 0.49             | 0.70             | 1.27             |        |                    |                    |                  |        | 4.87               | 2.50              | -2.34             |                 | 0.08             | 0.04             | -2.33             |        |
| Honduras      | (0.12,<br>1.36)  | (0.37,<br>1.22)  | (1.10,<br>1.43)  | <0.001 | —                  | —                  | —                | —      | (3.40,<br>6.79)    | (1.82,<br>3.36)   | (-2.71,<br>-1.97) | <0.001          | (0.00,<br>0.74)  | (0.00,<br>0.32)  | (-3.36,<br>-1.30) | <0.001 |
| Hungary       | 16.05            | 28.70            | 2.02             | <0.001 | 125.37             | 227.45             | 2.07             | <0.001 | 30.94              | 19.91             | -1.51             | 0.001           | 0.55             | 0.34             | -1.63             | <0.001 |



|                               |         |         |         |        |          |          |         |        |         |         |         |        |        |        |         |        |
|-------------------------------|---------|---------|---------|--------|----------|----------|---------|--------|---------|---------|---------|--------|--------|--------|---------|--------|
|                               | (14.31, | (26.10, | (1.99,  |        | (120.55, | (220.23, | (1.96,  |        | (28.56, | (17.76, | (-2.42, |        | (0.28, | (0.12, | (-2.43, |        |
|                               | 17.95)  | 31.51)  | 2.05)   |        | 130.35)  | 234.88)  | 2.19)   |        | 33.49)  | 22.27)  | -0.58)  |        | 1.00)  | 0.83)  | -0.82)  |        |
|                               | 0.33    | 1.35    | 5.19    |        |          | 6.81     |         |        | 14.50   | 10.02   | -1.23   |        | 0.24   | 0.17   | -1.07   |        |
| Iceland                       | (0.00,  | (0.02,  | (4.93,  | <0.001 | —        | (2.09,   | —       | —      | (6.13,  | (3.81,  | (-1.80, | <0.001 | (0.00, | (0.00, | (-2.14, | 0.053  |
|                               | 8.13)   | 9.70)   | 5.45)   |        |          | 17.59)   |         |        | 29.21)  | 22.22)  | -0.65)  |        | 7.95)  | 7.77)  | 0.01)   |        |
|                               | 0.55    | 0.72    | 0.88    |        |          | 2.03     |         |        | 7.61    | 7.72    | 0.08    |        | 0.13   | 0.13   | 0.10    |        |
| India                         | (0.51,  | (0.69,  | (0.64,  | <0.001 | —        | (1.98,   | —       | —      | (7.48,  | (7.62,  | (-0.48, | 0.786  | (0.11, | (0.12, | (-0.54, | 0.752  |
|                               | 0.59)   | 0.75)   | 1.11)   |        |          | 2.09)    |         |        | 7.74)   | 7.81)   | 0.64)   |        | 0.15)  | 0.15)  | 0.75)   |        |
|                               | 1.01    | 1.19    | 0.57    |        | 5.89     | 6.95     | 0.57    |        | 4.13    | 3.60    | -0.47   |        | 0.07   | 0.06   | -0.70   |        |
| Indonesia                     | (0.91,  | (1.10,  | (0.49,  | <0.001 | (5.63,   | (6.73,   | (0.45,  | <0.001 | (3.92,  | (3.44,  | (-0.57, | <0.001 | (0.05, | (0.04, | (-1.05, | <0.001 |
|                               | 1.12)   | 1.28)   | 0.65)   |        | 6.16)    | 7.17)    | 0.68)   |        | 4.34)   | 3.76)   | -0.37)  |        | 0.10)  | 0.09)  | -0.35)  |        |
|                               | 1.57    | 1.76    | 0.41    |        | 8.13     | 9.43     | 0.53    |        | 20.21   | 18.74   | -0.28   |        | 0.33   | 0.31   | -0.28   |        |
| Iran (Islamic<br>Republic of) | (1.33,  | (1.58,  | (0.33,  | <0.001 | (7.54,   | (9.04,   | (0.19,  | 0.002  | (19.37, | (18.10, | (-0.39, | <0.001 | (0.23, | (0.23, | (-0.55, | 0.041  |
|                               | 1.84)   | 1.96)   | 0.49)   |        | 8.76)    | 9.84)    | 0.87)   |        | 21.08)  | 19.40)  | -0.17)  |        | 0.47)  | 0.40)  | -0.01)  |        |
|                               | 1.77    | 1.69    | -0.14   |        | 8.86     | 9.01     | 0.04    |        | 8.75    | 6.23    | -1.17   |        | 0.15   | 0.11   | -1.05   |        |
| Iraq                          | (1.32,  | (1.42,  | (-0.28, | 0.050  | (7.75,   | (8.36,   | (-0.31, | 0.817  | (7.72,  | (5.72,  | (-1.34, | <0.001 | (0.04, | (0.05, | (-1.39, | <0.001 |
|                               | 2.33)   | 1.98)   | 0.00)   |        | 10.07)   | 9.70)    | 0.39)   |        | 9.88)   | 6.77)   | -1.00)  |        | 0.38)  | 0.20)  | -0.72)  |        |
|                               | 0.56    | 1.79    | 4.07    |        | 1.80     | 9.55     | 5.67    |        | 12.28   | 9.40    | -1.00   |        | 0.21   | 0.16   | -1.05   |        |
| Ireland                       | (0.14,  | (1.00,  | (3.94,  | <0.001 | (0.94,   | (7.69,   | (4.48,  | <0.001 | (9.78,  | (7.42,  | (-1.68, | 0.004  | (0.01, | (0.01, | (-1.98, | 0.030  |
|                               | 1.51)   | 2.99)   | 4.20)   |        | 3.15)    | 11.76)   | 6.88)   |        | 15.24)  | 11.77)  | -0.32)  |        | 0.96)  | 0.80)  | -0.10)  |        |
|                               | 0.59    | 0.92    | 1.55    |        | 2.02     | 1.85     | -0.33   |        | 10.26   | 6.30    | -1.74   |        | 0.16   | 0.10   | -1.65   |        |
| Israel                        | (0.20,  | (0.52,  | (1.38,  | <0.001 | (1.22,   | (1.26,   | (-0.55, | 0.004  | (8.34,  | (5.15,  | (-2.78, | 0.001  | (0.01, | (0.01, | (-2.52, | <0.001 |
|                               | 1.34)   | 1.52)   | 1.72)   |        | 3.16)    | 2.62)    | -0.10)  |        | 12.51)  | 7.64)   | -0.68)  |        | 0.71)  | 0.42)  | -0.77)  |        |
|                               | 34.84   | 40.96   | 0.58    |        | 276.77   | 328.08   | 0.61    |        | 19.29   | 12.84   | -1.52   |        | 0.32   | 0.21   | -1.58   |        |
| Italy                         | (33.73, | (39.63, | (0.43,  | <0.001 | (273.63, | (324.39, | (0.45,  | <0.001 | (18.47, | (12.08, | (-1.88, | <0.001 | (0.22, | (0.13, | (-1.94, | <0.001 |
|                               | 35.97)  | 42.32)  | 0.73)   |        | 279.95)  | 331.81)  | 0.76)   |        | 20.14)  | 13.63)  | -1.16)  |        | 0.45)  | 0.34)  | -1.22)  |        |
|                               | 1.24    | 1.92    | 1.50    |        | 5.57     | 8.74     | 1.39    |        | 4.92    | 7.94    | 1.79    |        | 0.08   | 0.13   | 1.82    |        |
| Jamaica                       | (0.41,  | (0.96,  | (1.41,  | <0.001 | (3.42,   | (6.41,   | (0.85,  | <0.001 | (3.09,  | (5.82,  | (0.56,  | 0.004  | (0.00, | (0.00, | (0.25,  | 0.023  |
|                               | 2.96)   | 3.46)   | 1.59)   |        | 8.58)    | 11.65)   | 1.93)   |        | 7.53)   | 10.61)  | 3.03)   |        | 1.20)  | 0.95)  | 3.41)   |        |
|                               | 50.81   | 58.97   | 0.53    |        | 407.38   | 476.26   | 0.55    |        | 11.86   | 5.35    | -2.69   |        | 0.20   | 0.08   | -3.21   |        |
| Japan                         | (49.88, | (57.85, | (0.49,  | <0.001 | (404.78, | (473.15, | (0.52,  | <0.001 | (11.42, | (5.01,  | (-2.86, | <0.001 | (0.14, | (0.05, | (-3.47, | <0.001 |
|                               | 51.74)  | 60.11)  | 0.56)   |        | 409.99)  | 479.39)  | 0.59)   |        | 12.32)  | 5.71)   | -2.53)  |        | 0.26)  | 0.14)  | -2.96)  |        |
|                               | 1.96    | 2.56    | 0.95    | <0.001 | 11.68    | 15.07    | 0.81    | 0.117  | 8.65    | 5.65    | -1.43   | <0.001 | 0.15   | 0.10   | -1.50   | <0.001 |

|                                        |                   |                   |                   |        |                     |                     |                   |        |                    |                    |                   |        |                  |                  |                   |        |
|----------------------------------------|-------------------|-------------------|-------------------|--------|---------------------|---------------------|-------------------|--------|--------------------|--------------------|-------------------|--------|------------------|------------------|-------------------|--------|
|                                        | (1.01,<br>3.49)   | (1.99,<br>3.25)   | (0.89,<br>1.00)   |        | (8.99,<br>14.96)    | (13.61,<br>16.65)   | (-0.20,<br>1.83)  |        | (6.52,<br>11.32)   | (4.78,<br>6.63)    | (-1.84,<br>-1.02) |        | (0.00,<br>1.02)  | (0.02,<br>0.31)  | (-2.14,<br>-0.85) |        |
|                                        | 12.52             | 16.98             | 1.05              |        | 97.52               | 132.91              | 1.05              |        | 3.54               | 4.51               | 0.75              |        | 0.06             | 0.07             | 0.32              |        |
| Kazakhstan                             | (11.36,<br>13.78) | (15.67,<br>18.38) | (1.01,<br>1.09)   | <0.001 | (94.21,<br>100.92)  | (129.26,<br>136.64) | (0.95,<br>1.16)   | <0.001 | (2.93,<br>4.24)    | (3.84,<br>5.28)    | (-0.31,<br>1.82)  | 0.166  | (0.01,<br>0.22)  | (0.01,<br>0.25)  | (-0.24,<br>0.88)  | 0.269  |
|                                        | 0.74              | 0.81              | 0.32              |        | 2.08                | 2.07                | -0.06             |        | 13.09              | 11.84              | -0.35             |        | 0.22             | 0.20             | -0.31             |        |
| Kenya                                  | (0.48,<br>1.09)   | (0.64,<br>1.02)   | (0.24,<br>0.41)   | <0.001 | (1.58,<br>2.69)     | (1.77,<br>2.40)     | (-0.16,<br>0.04)  | 0.229  | (11.96,<br>14.31)  | (11.18,<br>12.54)  | (-0.44,<br>-0.26) | <0.001 | (0.09,<br>0.45)  | (0.12,<br>0.31)  | (-0.74,<br>0.13)  | 0.174  |
|                                        | 1.79              | 1.69              | -0.25             |        | 12.10               | 9.21                | -1.25             |        | 57.16              | 60.33              | 0.16              |        | 0.91             | 0.97             | 0.21              |        |
| Kiribati                               | (0.00,<br>35.36)  | (0.00,<br>20.82)  | (-0.59,<br>0.09)  | 0.145  | (0.89,<br>53.26)    | (1.09,<br>33.77)    | (-1.93,<br>-0.56) | <0.001 | (25.55,<br>113.86) | (33.26,<br>101.51) | (0.01,<br>0.31)   | 0.035  | (0.00,<br>33.66) | (0.00,<br>19.45) | (0.06,<br>0.35)   | 0.006  |
|                                        | 5.43              | 6.12              | 0.36              |        | 37.61               | 43.18               | 0.43              |        | 14.88              | 13.06              | -0.56             |        | 0.23             | 0.21             | -0.39             |        |
| Kuwait                                 | (3.67,<br>7.98)   | (4.79,<br>7.83)   | (-0.14,<br>0.87)  | 0.162  | (32.88,<br>43.04)   | (39.89,<br>46.81)   | (-0.08,<br>0.94)  | 0.099  | (11.66,<br>18.88)  | (10.81,<br>15.74)  | (-2.11,<br>1.02)  | 0.485  | (0.01,<br>1.57)  | (0.02,<br>0.97)  | (-1.67,<br>0.91)  | 0.557  |
|                                        | 11.09             | 10.69             | -0.13             |        | 87.23               | 81.39               | -0.24             |        | 10.05              | 5.42               | -2.38             |        | 0.17             | 0.09             | -2.42             |        |
| Kyrgyzstan                             | (8.95,<br>13.60)  | (9.00,<br>12.61)  | (-0.16,<br>-0.09) | <0.001 | (80.92,<br>93.92)   | (76.55,<br>86.46)   | (-0.34,<br>-0.14) | <0.001 | (8.05,<br>12.42)   | (4.23,<br>6.84)    | (-3.63,<br>-1.11) | <0.001 | (0.01,<br>0.79)  | (0.00,<br>0.48)  | (-3.78,<br>-1.03) | 0.001  |
| Lao People's<br>Democratic<br>Republic | 0.86              | 1.07              | 0.77              |        | 5.01                | 6.20                | 0.75              |        | 3.53               | 3.94               | 0.42              |        | 0.06             | 0.07             | 0.52              |        |
|                                        | (0.30,<br>1.95)   | (0.61,<br>1.73)   | (0.68,<br>0.86)   | <0.001 | (3.39,<br>7.16)     | (4.98,<br>7.62)     | (0.53,<br>0.97)   | <0.001 | (2.26,<br>5.30)    | (3.01,<br>5.07)    | (0.26,<br>0.58)   | <0.001 | (0.00,<br>0.76)  | (0.00,<br>0.39)  | (0.52,<br>0.52)   | <0.001 |
|                                        | 14.22             | 25.61             | 2.09              |        | 109.87              | 202.41              | 2.17              |        | 6.43               | 7.97               | 0.81              |        | 0.11             | 0.14             | 0.90              |        |
| Latvia                                 | (11.09,<br>17.99) | (20.31,<br>32.09) | (1.90,<br>2.28)   | <0.001 | (100.89,<br>119.46) | (187.51,<br>218.38) | (1.88,<br>2.47)   | <0.001 | (4.39,<br>9.13)    | (5.20,<br>11.96)   | (-1.03,<br>2.69)  | 0.390  | (0.00,<br>1.05)  | (0.00,<br>2.00)  | (-1.05,<br>2.89)  | 0.369  |
|                                        | 1.91              | 2.18              | 0.48              |        | 9.27                | 12.13               | 0.93              |        | 37.69              | 35.69              | -0.15             |        | 0.62             | 0.59             | -0.13             |        |
| Lebanon                                | (0.90,<br>3.58)   | (1.40,<br>3.29)   | (0.40,<br>0.57)   | <0.001 | (6.68,<br>12.53)    | (10.19,<br>14.37)   | (0.61,<br>1.25)   | <0.001 | (32.83,<br>43.11)  | (32.12,<br>39.57)  | (-0.29,<br>-0.01) | 0.033  | (0.15,<br>1.78)  | (0.22,<br>1.32)  | (-0.26,<br>0.01)  | 0.070  |
|                                        | 0.73              | 1.11              | 1.43              |        | 1.87                | 2.77                | 1.20              |        | 14.23              | 19.30              | 1.07              |        | 0.24             | 0.32             | 0.99              |        |
| Lesotho                                | (0.09,<br>2.71)   | (0.37,<br>2.57)   | (1.31,<br>1.55)   | <0.001 | (0.57,<br>4.49)     | (1.45,<br>4.81)     | (1.02,<br>1.38)   | <0.001 | (10.33,<br>19.21)  | (15.57,<br>23.67)  | (0.88,<br>1.26)   | <0.001 | (0.00,<br>1.90)  | (0.02,<br>1.39)  | (0.70,<br>1.29)   | <0.001 |
|                                        | 0.87              | 0.90              | 0.12              |        | 2.55                | 2.45                | -0.18             |        | 8.86               | 8.77               | -0.20             |        | 0.15             | 0.15             | -0.12             |        |
| Liberia                                | (0.14,<br>2.95)   | (0.38,<br>1.80)   | (-0.02,<br>0.25)  | 0.092  | (1.10,<br>5.20)     | (1.50,<br>3.78)     | (-0.50,<br>0.15)  | 0.287  | (5.82,<br>13.04)   | (6.96,<br>10.93)   | (-0.47,<br>0.08)  | 0.159  | (0.00,<br>1.77)  | (0.01,<br>0.72)  | (-0.46,<br>0.23)  | 0.510  |
| Libya                                  | 2.20              | 1.97              | -0.40             | <0.001 | 12.70               | 11.47               | -0.28             | 0.228  | 25.83              | 22.61              | -0.55             | 0.048  | 0.41             | 0.37             | -0.46             | 0.116  |

|                  |                |                |                |        |                  |                  |                |        |                |                |                |        |               |               |                |
|------------------|----------------|----------------|----------------|--------|------------------|------------------|----------------|--------|----------------|----------------|----------------|--------|---------------|---------------|----------------|
|                  | (1.28, 3.55)   | (1.36, 2.80)   | (-0.53, -0.28) |        | (10.25, 15.58)   | (9.93, 13.20)    | (-0.73, 0.17)  |        | (22.58, 29.47) | (20.30, 25.12) | (-1.10, -0.01) |        | (0.10, 1.19)  | (0.13, 0.83)  | (-1.02, 0.11)  |
|                  | 20.12          | 29.62          | 1.40           |        | 158.30           | 235.62           | 1.41           |        | 6.57           | 13.19          | 2.42           |        | 0.11          | 0.23          | 2.58           |
| Lithuania        | (16.95, 23.72) | (24.84, 35.17) | (1.12, 1.69)   | <0.001 | (149.15, 167.88) | (221.92, 250.04) | (1.22, 1.61)   | <0.001 | (4.81, 8.77)   | (10.07, 17.09) | (0.98, 3.89)   | 0.001  | (0.00, 0.77)  | (0.01, 1.50)  | (1.25, 3.92)   |
|                  | 1.33           | 3.07           | 3.08           |        | 7.12             | 21.42            | 4.02           |        | 16.97          | 10.53          | -1.69          |        | 0.28          | 0.18          | -1.63          |
| Luxembourg       | (0.04, 9.09)   | (0.77, 9.21)   | (2.40, 3.75)   | <0.001 | (2.66, 16.96)    | (14.21, 31.77)   | (2.52, 5.55)   | <0.001 | (8.92, 30.26)  | (5.42, 19.12)  | (-2.33, -1.05) | <0.001 | (0.00, 7.53)  | (0.00, 4.99)  | (-2.56, -0.70) |
|                  | 1.26           | 1.03           | -0.70          |        | 5.90             | 4.95             | -0.62          |        | 51.11          | 30.98          | -1.77          |        | 0.86          | 0.52          | -1.79          |
| Madagascar       | (0.81, 1.89)   | (0.77, 1.37)   | (-0.95, -0.45) | <0.001 | (4.81, 7.17)     | (4.30, 5.66)     | (-1.03, -0.20) | 0.004  | (48.07, 54.32) | (29.47, 32.55) | (-2.29, -1.24) | <0.001 | (0.50, 1.39)  | (0.34, 0.76)  | (-2.36, -1.22) |
|                  | 0.54           | 0.57           | 0.18           |        |                  |                  |                |        | 14.24          | 14.15          | -0.01          |        | 0.24          | 0.23          | -0.06          |
| Malawi           | (0.24, 1.09)   | (0.34, 0.92)   | (0.12, 0.24)   | <0.001 | —                | —                | —              | —      | (12.46, 16.22) | (12.90, 15.49) | (-0.28, 0.25)  | 0.919  | (0.06, 0.66)  | (0.10, 0.48)  | (-0.54, 0.43)  |
|                  | 1.27           | 1.53           | 0.64           |        | 7.60             | 9.12             | 0.59           |        | 5.78           | 6.65           | 0.55           |        | 0.10          | 0.11          | 0.27           |
| Malaysia         | (0.92, 1.70)   | (1.26, 1.84)   | (0.61, 0.68)   | <0.001 | (6.69, 8.60)     | (8.44, 9.83)     | (0.53, 0.65)   | <0.001 | (5.02, 6.62)   | (6.07, 7.28)   | (-0.05, 1.15)  | 0.074  | (0.02, 0.27)  | (0.05, 0.22)  | (-1.13, 1.68)  |
|                  | 1.17           | 1.38           | 0.55           |        | 6.89             | 7.88             | 0.50           |        | 7.29           | 4.46           | -1.53          |        | 0.13          | 0.08          | -1.62          |
| Maldives         | (0.00, 16.64)  | (0.23, 6.68)   | (0.49, 0.61)   | <0.001 | (0.77, 26.46)    | (4.61, 14.32)    | (0.42, 0.58)   | <0.001 | (1.14, 26.19)  | (1.80, 10.74)  | (-2.12, -0.92) | <0.001 | (0.00, 14.87) | (0.00, 5.09)  | (-2.43, -0.81) |
|                  | 0.86           | 0.94           | 0.28           |        | 2.69             | 2.85             | 0.28           |        | 7.64           | 9.07           | 0.62           |        | 0.13          | 0.15          | 0.50           |
| Mali             | (0.42, 1.58)   | (0.63, 1.36)   | (0.14, 0.43)   | <0.001 | (1.81, 3.86)     | (2.23, 3.57)     | (0.17, 0.39)   | <0.001 | (6.21, 9.31)   | (8.09, 10.16)  | (0.32, 0.92)   | <0.001 | (0.01, 0.55)  | (0.05, 0.37)  | (-0.03, 1.03)  |
|                  | 0.29           | 0.99           | 4.76           |        |                  | 2.67             |                |        | 7.13           | 8.42           | 0.56           |        | 0.12          | 0.14          | 0.41           |
| Malta            | (0.00, 6.72)   | (0.01, 9.23)   | (4.09, 5.44)   | <0.001 | —                | (0.43, 11.39)    | —              | —      | (2.31, 17.18)  | (3.12, 19.73)  | (-0.12, 1.25)  | 0.108  | (0.00, 6.42)  | (0.00, 7.99)  | (-0.15, 0.98)  |
|                  | 1.59           | 1.60           | -0.01          |        | 8.50             | 8.21             | -0.16          |        | 34.55          | 30.17          | -0.49          |        | 0.55          | 0.49          | -0.42          |
| Marshall Islands | (0.00, 55.60)  | (0.00, 34.34)  | (-0.21, 0.19)  | 0.910  | (0.03, 68.81)    | (0.22, 46.24)    | (-0.43, 0.10)  | 0.231  | (7.16, 107.16) | (7.65, 80.60)  | (-0.62, -0.35) | <0.001 | (0.00, 53.53) | (0.00, 32.14) | (-0.66, -0.18) |
|                  | 1.23           | 1.19           | -0.14          |        | 6.27             | 5.28             | -0.61          |        | 10.35          | 8.02           | -0.87          |        | 0.17          | 0.14          | -0.71          |
| Mauritania       | (0.34, 3.23)   | (0.51, 2.40)   | (-0.28, 0.01)  | 0.065  | (3.76, 9.85)     | (3.61, 7.47)     | (-0.90, -0.32) | <0.001 | (7.25, 14.42)  | (6.06, 10.46)  | (-1.07, -0.68) | <0.001 | (0.00, 1.59)  | (0.00, 0.87)  | (-0.95, -0.46) |
|                  | 1.37           | 1.63           | 0.59           | <0.001 | 7.81             | 8.97             | 0.49           | 0.001  | 24.44          | 18.14          | -1.19          | 0.048  | 0.43          | 0.32          | -1.18          |
| Mauritius        |                |                |                |        |                  |                  |                |        |                |                |                |        |               |               |                |

|                                        |                          |                          |                           |        |                          |                          |                            |        |                            |                            |                            |        |                   |                   |                   |        |
|----------------------------------------|--------------------------|--------------------------|---------------------------|--------|--------------------------|--------------------------|----------------------------|--------|----------------------------|----------------------------|----------------------------|--------|-------------------|-------------------|-------------------|--------|
|                                        | (0.33,<br>3.80)          | (0.44,<br>4.30)          | (0.52,<br>0.66)           |        | (4.71,<br>12.21)         | (5.66,<br>13.60)         | (0.19,<br>0.79)            |        | (18.68,<br>31.44)          | (13.23,<br>24.35)          | (-2.35,<br>-0.01)          |        | (0.01,<br>2.36)   | (0.00,<br>2.28)   | (-2.35,<br>0.00)  |        |
|                                        | 0.72                     | 2.02                     | 3.67                      |        |                          | 8.78                     |                            |        | 9.29                       | 8.24                       | -0.37                      |        | 0.16              | 0.14              | -0.33             |        |
| Mexico                                 | (0.59,<br>0.87)          | (1.85,<br>2.21)          | (3.45,<br>3.89)           | <0.001 | —                        | (8.41,<br>9.17)          | —                          | —      | (8.82,<br>9.78)            | (7.89,<br>8.61)            | (-0.94,<br>0.20)           | 0.200  | (0.10,<br>0.24)   | (0.10,<br>0.20)   | (-1.47,<br>0.82)  | 0.575  |
| Micronesia<br>(Federated States<br>of) | 1.61<br>(0.00,<br>25.07) | 1.58<br>(0.00,<br>23.66) | -0.13<br>(-0.38,<br>0.11) | 0.280  | 8.41<br>(0.57,<br>37.08) | 7.73<br>(0.49,<br>34.67) | -0.32<br>(-0.51,<br>-0.13) | 0.001  | 36.37<br>(14.91,<br>75.81) | 32.22<br>(13.00,<br>68.19) | -0.42<br>(-0.47,<br>-0.37) | <0.001 | (0.00,<br>23.08)  | (0.00,<br>21.62)  | (-0.65,<br>-0.23) | <0.001 |
|                                        | 0.81                     | 3.84                     | 5.55                      |        | 2.60                     | 25.52                    | 8.13                       |        | 8.53                       | 7.57                       | -0.40                      |        | 0.15              | 0.13              | -0.51             |        |
| Monaco                                 | (0.00,<br>121.03)        | (0.00,<br>93.55)         | (5.28,<br>5.83)           | <0.001 | (0.00,<br>123.43)        | (1.23,<br>130.43)        | (5.15,<br>11.20)           | <0.001 | (0.00,<br>132.80)          | (0.00,<br>100.46)          | (-0.48,<br>-0.33)          | <0.001 | (0.00,<br>120.04) | (0.00,<br>86.51)  | (-1.05,<br>0.04)  | 0.069  |
|                                        | 11.94                    | 13.69                    | 0.46                      |        | 94.23                    | 105.44                   | 0.32                       |        | 13.96                      | 16.57                      | 0.60                       |        | 0.23              | 0.28              | 0.74              |        |
| Mongolia                               | (8.69,<br>16.10)         | (11.13,<br>16.73)        | (0.39,<br>0.54)           | <0.001 | (84.30,<br>105.07)       | (98.25,<br>113.09)       | (0.09,<br>0.54)            | 0.006  | (10.53,<br>18.28)          | (13.70,<br>19.94)          | (-0.03,<br>1.24)           | 0.061  | (0.00,<br>1.65)   | (0.03,<br>1.16)   | (-0.08,<br>1.57)  | 0.075  |
|                                        | 14.24                    | 22.65                    | 1.62                      |        | 111.16                   | 179.03                   | 1.66                       |        | 7.52                       | 5.24                       | -1.75                      |        | 0.13              | 0.09              | -1.82             |        |
| Montenegro                             | (8.53,<br>22.39)         | (14.74,<br>33.52)        | (1.57,<br>1.66)           | <0.001 | (93.89,<br>130.74)       | (155.56,<br>205.26)      | (1.58,<br>1.74)            | <0.001 | (3.58,<br>13.98)           | (1.90,<br>11.76)           | (-3.51,<br>0.06)           | 0.057  | (0.00,<br>3.24)   | (0.00,<br>4.00)   | (-3.66,<br>0.05)  | 0.056  |
|                                        | 1.47                     | 1.65                     | 0.39                      |        | 8.06                     | 8.88                     | 0.34                       |        | 19.66                      | 14.37                      | -1.04                      |        | 0.33              | 0.23              | -1.27             |        |
| Morocco                                | (1.14,<br>1.87)          | (1.37,<br>1.97)          | (0.31,<br>0.46)           | <0.001 | (7.22,<br>8.96)          | (8.21,<br>9.59)          | (0.29,<br>0.40)            | <0.001 | (18.44,<br>20.94)          | (13.52,<br>15.27)          | (-1.42,<br>-0.65)          | <0.001 | (0.19,<br>0.54)   | (0.14,<br>0.38)   | (-1.75,<br>-0.79) | <0.001 |
|                                        | 0.53                     | 0.67                     | 0.74                      |        |                          | 1.87                     |                            |        | 11.42                      | 16.09                      | 1.22                       |        | 0.19              | 0.27              | 1.26              |        |
| Mozambique                             | (0.25,<br>1.00)          | (0.45,<br>0.97)          | (0.61,<br>0.87)           | <0.001 | —                        | (1.46,<br>2.37)          | —                          | —      | (9.96,<br>13.05)           | (14.96,<br>17.28)          | (0.99,<br>1.45)            | <0.001 | (0.05,<br>0.53)   | (0.14,<br>0.48)   | (1.01,<br>1.51)   | <0.001 |
|                                        | 0.73                     | 1.03                     | 1.20                      |        | 2.50                     | 5.92                     | 3.13                       |        | 5.89                       | 4.69                       | -0.75                      |        | 0.10              | 0.08              | -0.75             |        |
| Myanmar                                | (0.55,<br>0.95)          | (0.84,<br>1.24)          | (1.03,<br>1.37)           | <0.001 | (2.14,<br>2.91)          | (5.47,<br>6.41)          | (2.48,<br>3.78)            | <0.001 | (5.37,<br>6.45)            | (4.29,<br>5.12)            | (-0.84,<br>-0.66)          | <0.001 | (0.04,<br>0.20)   | (0.03,<br>0.15)   | (-0.75,<br>-0.75) | <0.001 |
|                                        | 1.12                     | 1.12                     | -0.02                     |        | 5.33                     | 5.18                     | -0.14                      |        | 14.45                      | 15.55                      | 0.28                       |        | 0.24              | 0.26              | 0.28              |        |
| Namibia                                | (0.18,<br>3.80)          | (0.37,<br>2.62)          | (-0.20,<br>0.15)          | 0.788  | (2.60,<br>9.74)          | (3.26,<br>7.83)          | (-0.39,<br>0.11)           | 0.274  | (10.10,<br>20.24)          | (12.23,<br>19.54)          | (-0.03,<br>0.58)           | 0.078  | (0.00,<br>2.40)   | (0.01,<br>1.34)   | (-0.15,<br>0.72)  | 0.205  |
|                                        | 1.95                     | 1.78                     | -0.35                     |        | 13.05                    | 9.24                     | -1.19                      |        | 43.49                      | 37.39                      | -0.51                      |        | 0.70              | 0.60              | -0.53             |        |
| Nauru                                  | (0.00,<br>211.39)        | (0.00,<br>190.20)        | (-0.46,<br>-0.23)         | <0.001 | (0.00,<br>233.25)        | (0.00,<br>205.22)        | (-1.53,<br>-0.85)          | <0.001 | (0.74,<br>284.48)          | (0.59,<br>252.18)          | (-0.55,<br>-0.48)          | <0.001 | (0.00,<br>208.88) | (0.00,<br>187.83) | (-0.61,<br>-0.46) | <0.001 |
| Nepal                                  | 0.48                     | 0.56                     | 0.53                      | <0.001 | —                        | —                        | —                          | —      | 5.28                       | 5.83                       | 0.35                       | <0.001 | 0.09              | 0.10              | 0.43              | 0.185  |

|                             |                    |                    |                  |        |                     |                     |                   |                 |                    |                    |                   |                 |                    |                    |                   |        |
|-----------------------------|--------------------|--------------------|------------------|--------|---------------------|---------------------|-------------------|-----------------|--------------------|--------------------|-------------------|-----------------|--------------------|--------------------|-------------------|--------|
|                             | (0.27,<br>0.79)    | (0.38,<br>0.81)    | (0.41,<br>0.65)  |        |                     |                     |                   | (4.52,<br>6.14) | (5.21,<br>6.51)    | (0.21,<br>0.49)    |                   | (0.02,<br>0.28) | (0.03,<br>0.23)    | (-0.20,<br>1.06)   |                   |        |
|                             | 0.70               | 0.97               | 1.07             |        | 2.32                | 2.06                | -0.55             | 11.75           | 7.83               | -1.41              |                   | 0.20            | 0.14               | -1.28              |                   |        |
| Netherlands                 | (0.44,<br>1.07)    | (0.64,<br>1.42)    | (0.82,<br>1.33)  | <0.001 | (1.83,<br>2.92)     | (1.56,<br>2.67)     | (-0.82,<br>-0.29) | <0.001          | (10.58,<br>13.01)  | (6.81,<br>8.95)    | (-1.98,<br>-0.83) | <0.001          | (0.08,<br>0.45)    | (0.03,<br>0.37)    | (-2.10,<br>-0.46) | 0.002  |
|                             | 9.40               | 13.69              | 1.31             |        | 71.59               | 107.12              | 1.42              |                 | 18.79              | 13.55              | -1.09             |                 | 0.32               | 0.23               | -1.09             |        |
| New Zealand                 | (7.25,<br>11.99)   | (11.08,<br>16.74)  | (1.23,<br>1.38)  | <0.001 | (65.41,<br>78.20)   | (99.58,<br>115.08)  | (1.29,<br>1.56)   | <0.001          | (15.69,<br>22.33)  | (10.96,<br>16.58)  | (-1.40,<br>-0.79) | <0.001          | (0.04,<br>1.10)    | (0.02,<br>0.96)    | (-1.39,<br>-0.78) | <0.001 |
|                             | 0.57               | 0.86               | 1.49             |        | —                   | —                   | —                 |                 | 8.14               | 7.19               | -0.62             |                 | 0.14               | 0.12               | -0.66             |        |
| Nicaragua                   | (0.13,<br>1.65)    | (0.44,<br>1.53)    | (1.34,<br>1.64)  | <0.001 | —                   | —                   | —                 | —               | (6.07,<br>10.74)   | (5.85,<br>8.75)    | (-1.08,<br>-0.15) | 0.010           | (0.00,<br>0.98)    | (0.01,<br>0.49)    | (-1.30,<br>-0.03) | 0.042  |
|                             | 0.88               | 0.89               | 0.02             |        | 2.57                | 2.62                | 0.05              |                 | 8.02               | 8.67               | 0.31              |                 | 0.13               | 0.15               | 0.54              |        |
| Niger                       | (0.42,<br>1.65)    | (0.59,<br>1.30)    | (-0.10,<br>0.14) | 0.740  | (1.65,<br>3.80)     | (2.03,<br>3.31)     | (-0.53,<br>0.64)  | 0.855           | (6.51,<br>9.80)    | (7.71,<br>9.72)    | (0.02,<br>0.61)   | 0.035           | (0.01,<br>0.61)    | (0.05,<br>0.36)    | (0.38,<br>0.70)   | <0.001 |
|                             | 0.97               | 1.06               | 0.29             |        | 2.82                | 5.20                | 2.09              |                 | 8.80               | 7.86               | -0.38             |                 | 0.15               | 0.13               | -0.57             |        |
| Nigeria                     | (0.82,<br>1.14)    | (0.96,<br>1.18)    | (0.15,<br>0.44)  | <0.001 | (2.55,<br>3.12)     | (4.94,<br>5.46)     | (1.69,<br>2.49)   | <0.001          | (8.34,<br>9.27)    | (7.57,<br>8.16)    | (-0.53,<br>-0.23) | <0.001          | (0.09,<br>0.22)    | (0.10,<br>0.18)    | (-1.01,<br>-0.12) | 0.013  |
|                             | 1.70               | 2.02               | 0.59             |        | 9.23                | 11.98               | 0.72              |                 | 33.89              | 24.94              | -1.07             |                 | 0.54               | 0.39               | -1.14             |        |
| Niue                        | (0.00,<br>1034.68) | (0.00,<br>1470.97) | (0.52,<br>0.67)  | <0.001 | (0.00,<br>1050.55)  | (0.00,<br>1490.67)  | (0.23,<br>1.22)   | 0.004           | (0.00,<br>1092.99) | (0.00,<br>1513.32) | (-1.22,<br>-0.92) | <0.001          | (0.00,<br>1032.28) | (0.00,<br>1467.72) | (-1.45,<br>-0.84) | <0.001 |
|                             | 12.17              | 19.23              | 1.60             |        | 94.70               | 152.40              | 1.68              |                 | 6.96               | 6.79               | -0.11             |                 | 0.11               | 0.11               | -0.06             |        |
| North Macedonia             | (9.07,<br>16.01)   | (15.34,<br>23.96)  | (1.56,<br>1.63)  | <0.001 | (85.64,<br>104.46)  | (141.35,<br>164.22) | (1.56,<br>1.80)   | <0.001          | (4.66,<br>10.00)   | (4.49,<br>10.00)   | (-0.79,<br>0.57)  | 0.749           | (0.00,<br>1.14)    | (0.00,<br>1.46)    | (-0.95,<br>0.85)  | 0.902  |
|                             | 2.63               | 2.85               | 0.15             |        | 16.43               | 17.02               | 0.09              |                 | 41.81              | 42.36              | -0.00             |                 | 0.67               | 0.67               | -0.04             |        |
| Northern Mariana<br>Islands | (0.00,<br>47.34)   | (0.00,<br>84.77)   | (-0.12,<br>0.41) | 0.279  | (2.30,<br>67.39)    | (0.32,<br>109.64)   | (-0.63,<br>0.82)  | 0.801           | (12.73,<br>106.50) | (9.19,<br>140.87)  | (-0.19,<br>0.19)  | 0.975           | (0.00,<br>44.35)   | (0.00,<br>80.82)   | (-0.54,<br>0.46)  | 0.874  |
|                             | 26.99              | 28.41              | 0.25             |        | 213.99              | 226.17              | 0.27              |                 | 8.26               | 4.45               | -2.10             |                 | 0.14               | 0.08               | -2.16             |        |
| Norway                      | (23.60,<br>30.75)  | (25.13,<br>32.02)  | (0.12,<br>0.39)  | <0.001 | (204.30,<br>224.04) | (216.87,<br>235.80) | (0.13,<br>0.42)   | <0.001          | (6.44,<br>10.47)   | (3.22,<br>6.03)    | (-2.69,<br>-1.52) | <0.001          | (0.01,<br>0.75)    | (0.00,<br>0.62)    | (-2.77,<br>-1.55) | <0.001 |
|                             | 2.02               | 2.27               | 0.40             |        | 13.36               | 13.59               | 0.09              |                 | 17.18              | 13.16              | -0.92             |                 | 0.28               | 0.22               | -0.92             |        |
| Oman                        | (1.01,<br>3.73)    | (1.64,<br>3.24)    | (0.32,<br>0.48)  | <0.001 | (10.53,<br>16.82)   | (12.13,<br>15.33)   | (-0.10,<br>0.28)  | 0.362           | (13.77,<br>21.25)  | (11.37,<br>15.27)  | (-1.30,<br>-0.53) | <0.001          | (0.02,<br>1.38)    | (0.05,<br>0.88)    | (-1.61,<br>-0.23) | 0.009  |

|                  |         |         |         |        |          |          |         |        |         |         |         |        |         |         |         |        |
|------------------|---------|---------|---------|--------|----------|----------|---------|--------|---------|---------|---------|--------|---------|---------|---------|--------|
|                  | 0.68    | 0.77    | 0.44    |        | 0.01     | 1.97     | 0.31    |        | 7.74    | 12.19   | 1.60    |        | 0.13    | 0.21    | 1.66    |        |
| Pakistan         | (0.56,  | (0.69,  | (0.25,  | <0.001 | (0.00,   | (1.83,   | (0.02,  | 0.035  | (7.35,  | (11.86, | (1.41,  | <0.001 | (0.09,  | (0.17,  | (1.37,  | <0.001 |
|                  | 0.81)   | 0.87)   | 0.62)   |        | 0.04)    | 2.12)    | 0.60)   |        | 8.15)   | 12.52)  | 1.80)   |        | 0.20)   | 0.26)   | 1.95)   |        |
|                  | 1.78    | 2.08    | 0.52    |        | 11.99    | 12.40    | 0.06    |        | 11.63   | 11.72   | 0.03    |        | 0.18    | 0.19    | 0.03    |        |
| Palau            | (0.00,  | (0.00,  | (0.43,  | <0.001 | (0.00,   | (0.01,   | (-0.23, | 0.696  | (0.00,  | (0.00,  | (-0.07, | 0.554  | (0.00,  | (0.00,  | (-0.01, | 0.131  |
|                  | 118.38) | 134.12) | 0.61)   |        | 138.00)  | 150.08)  | 0.35)   |        | 136.25) | 151.72) | 0.13)   |        | 115.26) | 130.98) | 0.07)   |        |
|                  | 1.51    | 1.64    | 0.29    |        | 7.96     | 8.75     | 0.38    |        | 8.07    | 7.44    | -0.39   |        | 0.13    | 0.12    | -0.41   |        |
| Palestine        | (0.46,  | (0.92,  | (0.22,  | <0.001 | (4.88,   | (6.85,   | (0.11,  | 0.006  | (5.32,  | (5.83,  | (-0.99, | 0.202  | (0.00,  | (0.01,  | (-1.21, | 0.319  |
|                  | 3.84)   | 2.72)   | 0.36)   |        | 12.31)   | 11.02)   | 0.65)   |        | 11.94)  | 9.38)   | 0.21)   |        | 1.80)   | 0.68)   | 0.40)   |        |
|                  | 0.79    | 1.09    | 1.11    |        | 1.98     | 1.97     | 0.05    |        | 20.21   | 11.28   | -1.88   |        | 0.34    | 0.19    | -1.83   |        |
| Panama           | (0.20,  | (0.49,  | (0.93,  | <0.001 | (0.86,   | (1.11,   | (-0.14, | 0.632  | (16.36, | (9.07,  | (-3.08, | 0.002  | (0.03,  | (0.01,  | (-3.16, | 0.008  |
|                  | 2.17)   | 2.10)   | 1.29)   |        | 3.90)    | 3.23)    | 0.23)   |        | 24.74)  | 13.87)  | -0.68)  |        | 1.50)   | 0.82)   | -0.47)  |        |
|                  | 1.48    | 1.53    | 0.09    |        | 7.95     | 8.00     | -0.06   |        | 18.10   | 17.75   | -0.18   |        | 0.29    | 0.28    | -0.21   |        |
| Papua New Guinea | (0.74,  | (1.03,  | (-0.10, | 0.357  | (5.97,   | (6.75,   | (-0.26, | 0.589  | (15.34, | (16.00, | (-0.32, | 0.015  | (0.05,  | (0.10,  | (-0.37, | 0.010  |
|                  | 2.67)   | 2.19)   | 0.29)   |        | 10.39)   | 9.41)    | 0.15)   |        | 21.25)  | 19.66)  | -0.03)  |        | 1.03)   | 0.64)   | -0.05)  |        |
|                  | 0.99    | 1.45    | 1.31    |        | 2.41     | 4.84     | 2.48    |        | 13.68   | 19.80   | 1.36    |        | 0.23    | 0.34    | 1.39    |        |
| Paraguay         | (0.41,  | (0.91,  | (1.25,  | <0.001 | (1.37,   | (3.76,   | (1.78,  | <0.001 | (11.16, | (17.61, | (0.76,  | <0.001 | (0.02,  | (0.11,  | (0.64,  | <0.001 |
|                  | 2.05)   | 2.21)   | 1.36)   |        | 3.91)    | 6.13)    | 3.18)   |        | 16.63)  | 22.20)  | 1.97)   |        | 0.96)   | 0.79)   | 2.16)   |        |
|                  | 0.57    | 1.54    | 3.54    |        |          | 6.19     |         |        | 10.05   | 6.56    | -1.27   |        | 0.16    | 0.11    | -1.12   |        |
| Peru             | (0.36,  | (1.26,  | (3.39,  | <0.001 | —        | (5.60,   | —       | —      | (9.12,  | (5.97,  | (-2.33, | 0.021  | (0.06,  | (0.05,  | (-2.16, | 0.037  |
|                  | 0.87)   | 1.87)   | 3.69)   |        |          | 6.81)    |         |        | 11.06)  | 7.19)   | -0.19)  |        | 0.35)   | 0.22)   | -0.07)  |        |
|                  | 1.00    | 1.07    | 0.25    |        | 5.83     | 6.27     | 0.26    |        | 1.41    | 3.95    | 3.68    |        | 0.02    | 0.07    | 4.37    |        |
| Philippines      | (0.82,  | (0.94,  | (0.16,  | <0.001 | (5.38,   | (5.94,   | (0.18,  | <0.001 | (1.21,  | (3.70,  | (3.07,  | <0.001 | (0.00,  | (0.04,  | (2.69,  | <0.001 |
|                  | 1.20)   | 1.22)   | 0.33)   |        | 6.31)    | 6.61)    | 0.33)   |        | 1.65)   | 4.22)   | 4.29)   |        | 0.08)   | 0.11)   | 6.09)   |        |
|                  | 14.83   | 19.11   | 0.88    |        | 115.72   | 151.01   | 0.93    |        | 5.76    | 11.97   | 2.47    |        | 0.10    | 0.20    | 2.34    |        |
| Poland           | (13.98, | (18.10, | (0.79,  | <0.001 | (113.41, | (148.30, | (0.87,  | <0.001 | (5.23,  | (11.17, | (1.83,  | <0.001 | (0.04,  | (0.11,  | (1.62,  | <0.001 |
|                  | 15.72)  | 20.16)  | 0.98)   |        | 118.08)  | 153.77)  | 1.00)   |        | 6.33)   | 12.83)  | 3.11)   |        | 0.20)   | 0.36)   | 3.07)   |        |
|                  | 0.19    | 0.61    | 4.00    |        |          |          |         |        | 19.72   | 15.02   | -0.91   |        | 0.33    | 0.26    | -0.79   |        |
| Portugal         | (0.05,  | (0.29,  | (3.60,  | <0.001 | —        | —        | —       | —      | (17.75, | (13.17, | (-1.44, | 0.001  | (0.12,  | (0.07,  | (-1.45, | 0.020  |
|                  | 0.52)   | 1.15)   | 4.41)   |        |          |          |         |        | 21.84)  | 17.08)  | -0.38)  |        | 0.72)   | 0.68)   | -0.12)  |        |
|                  | 3.82    | 10.80   | 3.70    |        | 23.22    | 78.30    | 4.35    |        | 26.65   | 18.50   | -1.51   |        | 0.46    | 0.32    | -1.55   |        |
| Puerto Rico      | (2.47,  | (8.25,  | (3.56,  | <0.001 | (19.63,  | (71.16,  | (4.07,  | <0.001 | (22.84, | (15.09, | (-2.95, | 0.043  | (0.10,  | (0.03,  | (-2.71, | 0.009  |
|                  | 5.65)   | 13.91)  | 3.83)   |        | 27.28)   | 85.98)   | 4.62)   |        | 30.92)  | 22.45)  | -0.05)  |        | 1.36)   | 1.25)   | -0.38)  |        |

|                                     |         |         |         |        |          |          |         |        |         |         |         |        |        |        |         |        |
|-------------------------------------|---------|---------|---------|--------|----------|----------|---------|--------|---------|---------|---------|--------|--------|--------|---------|--------|
|                                     | 7.88    | 6.84    | -0.43   |        | 55.03    | 49.88    | -0.31   |        | 11.18   | 5.82    | -2.37   |        | 0.18   | 0.10   | -2.15   |        |
| Qatar                               | (4.39,  | (5.53,  | (-0.68, | 0.001  | (45.62,  | (46.59,  | (-0.49, | 0.001  | (6.34,  | (4.37,  | (-3.09, | <0.001 | (0.00, | (0.00, | (-3.11, | <0.001 |
|                                     | 14.73)  | 8.80)   | -0.17)  |        | 67.09)   | 53.69)   | -0.13)  |        | 19.47)  | 7.96)   | -1.63)  |        | 5.39)  | 1.35)  | -1.18)  |        |
|                                     | 26.05   | 37.22   | 1.24    |        | 207.07   | 295.90   | 1.26    |        | 6.13    | 3.62    | -1.81   |        | 0.10   | 0.06   | -2.06   |        |
| Republic of Korea                   | (25.09, | (36.03, | (1.22,  | <0.001 | (204.30, | (292.63, | (1.18,  | <0.001 | (5.67,  | (3.25,  | (-2.03, | <0.001 | (0.05, | (0.02, | (-2.50, | <0.001 |
|                                     | 27.05)  | 38.44)  | 1.25)   |        | 209.87)  | 299.20)  | 1.35)   |        | 6.63)   | 4.03)   | -1.59)  |        | 0.18)  | 0.14)  | -1.62)  |        |
|                                     | 14.43   | 21.27   | 1.34    |        | 111.47   | 167.96   | 1.40    |        | 4.72    | 4.62    | -0.41   |        | 0.08   | 0.07   | -0.62   |        |
| Republic of<br>Moldova              | (12.05, | (18.06, | (1.28,  | <0.001 | (104.78, | (159.10, | (1.13,  | <0.001 | (3.38,  | (3.15,  | (-1.25, | 0.336  | (0.00, | (0.00, | (-1.53, | 0.190  |
|                                     | 17.18)  | 24.98)  | 1.41)   |        | 118.51)  | 177.27)  | 1.67)   |        | 6.45)   | 6.63)   | 0.43)   |        | 0.65)  | 0.92)  | 0.31)   |        |
|                                     | 13.39   | 32.16   | 3.09    |        | 104.78   | 254.83   | 3.13    |        | 12.07   | 10.26   | -0.47   |        | 0.20   | 0.17   | -0.48   |        |
| Romania                             | (12.33, | (30.18, | (3.03,  | <0.001 | (101.79, | (249.39, | (3.02,  | <0.001 | (11.06, | (9.14,  | (-1.12, | 0.159  | (0.09, | (0.06, | (-1.58, | 0.391  |
|                                     | 14.53)  | 34.24)  | 3.14)   |        | 107.83)  | 260.37)  | 3.25)   |        | 13.15)  | 11.49)  | 0.19)   |        | 0.40)  | 0.41)  | 0.63)   |        |
|                                     | 17.56   | 31.22   | 2.01    |        | 137.46   | 248.10   | 2.06    |        | 6.39    | 13.01   | 2.53    |        | 0.10   | 0.22   | 2.72    |        |
| Russian Federation                  | (17.10, | (30.55, | (1.97,  | <0.001 | (136.19, | (246.29, | (2.02,  | <0.001 | (6.10,  | (12.57, | (1.10,  | <0.001 | (0.07, | (0.17, | (1.15,  | 0.001  |
|                                     | 18.04)  | 31.90)  | 2.05)   |        | 138.73)  | 249.92)  | 2.11)   |        | 6.69)   | 13.47)  | 3.99)   |        | 0.15)  | 0.29)  | 4.32)   |        |
|                                     | 0.76    | 0.64    | -0.60   |        | 2.12     | 1.86     |         |        | 23.68   | 13.81   | -1.83   |        | 0.40   | 0.23   | -1.90   |        |
| Rwanda                              | (0.35,  | (0.37,  | (-0.71, | <0.001 | (1.33,   | (1.34,   | —       | —      | (21.07, | (12.41, | (-2.02, | <0.001 | (0.13, | (0.08, | (-2.25, | <0.001 |
|                                     | 1.46)   | 1.05)   | -0.49)  |        | 3.21)    | 2.52)    |         |        | 26.53)  | 15.34)  | -1.65)  |        | 0.96)  | 0.52)  | -1.54)  |        |
|                                     | 1.65    | 2.48    | 1.38    |        | 7.57     | 13.89    | 2.12    |        | 23.20   | 13.75   | -1.24   |        | 0.41   | 0.23   | -1.45   |        |
| Saint Kitts and<br>Nevis            | (0.00,  | (0.00,  | (1.25,  | <0.001 | (0.02,   | (1.34,   | (1.68,  | <0.001 | (2.46,  | (1.09,  | (-2.51, | 0.058  | (0.00, | (0.00, | (-3.09, | 0.091  |
|                                     | 55.44)  | 41.06)  | 1.51)   |        | 66.66)   | 59.31)   | 2.57)   |        | 91.78)  | 60.17)  | 0.04)   |        | 53.11) | 36.96) | 0.23)   |        |
|                                     | 1.39    | 1.99    | 1.20    |        | 5.94     | 10.81    | 2.00    |        | 18.25   | 14.60   | -0.70   |        | 0.32   | 0.25   | -0.81   |        |
| Saint Lucia                         | (0.00,  | (0.01,  | (1.07,  | <0.001 | (0.26,   | (2.81,   | (1.32,  | <0.001 | (5.26,  | (4.75,  | (-1.18, | 0.005  | (0.00, | (0.00, | (-1.37, | 0.005  |
|                                     | 21.86)  | 15.42)  | 1.33)   |        | 30.09)   | 29.06)   | 2.69)   |        | 47.52)  | 34.59)  | -0.22)  |        | 19.97) | 12.27) | -0.25)  |        |
|                                     | 1.69    | 2.33    | 1.05    |        | 7.68     | 11.01    | 1.13    |        | 48.61   | 27.88   | -1.89   |        | 0.84   | 0.48   | -1.92   |        |
| Saint Vincent and<br>the Grenadines | (0.00,  | (0.00,  | (0.82,  | <0.001 | (0.42,   | (1.66,   | (0.14,  | 0.025  | (23.11, | (10.10, | (-2.95, | 0.001  | (0.00, | (0.00, | (-2.99, | 0.001  |
|                                     | 26.35)  | 22.88)  | 1.28)   |        | 36.94)   | 37.26)   | 2.13)   |        | 92.39)  | 61.61)  | -0.82)  |        | 24.88) | 19.37) | -0.83)  |        |
|                                     | 1.67    | 1.71    | 0.07    |        | 8.77     | 8.58     | -0.15   |        | 23.37   | 20.78   | -0.40   |        | 0.37   | 0.34   | -0.32   |        |
| Samoa                               | (0.00,  | (0.01,  | (-0.02, | 0.113  | (1.12,   | (1.73,   | (-0.26, | 0.010  | (10.10, | (9.38,  | (-0.49, | <0.001 | (0.00, | (0.00, | (-0.49, | <0.001 |
|                                     | 19.62)  | 14.25)  | 0.16)   |        | 31.84)   | 25.52)   | -0.04)  |        | 49.18)  | 40.94)  | -0.32)  |        | 17.34) | 11.72) | -0.15)  |        |
|                                     | 0.62    | 1.77    | 3.71    |        | 1.99     | 9.43     | 5.32    |        | 4.24    | 8.48    | 2.43    |        | 0.07   | 0.15   | 2.66    |        |
| San Marino                          | (0.00,  | (0.00,  | (3.54,  | <0.001 | (0.00,   | (0.01,   | (3.70,  | <0.001 | (0.00,  | (0.00,  | (2.29,  | <0.001 | (0.00, | (0.00, | (2.15,  | <0.001 |
|                                     | 87.01)  | 81.84)  | 3.88)   |        | 89.79)   | 95.91)   | 6.96)   |        | 94.13)  | 94.56)  | 2.57)   |        | 85.92) | 78.63) | 3.18)   |        |

|                       |         |         |         |        |          |          |         |        |         |         |         |        |        |        |         |        |
|-----------------------|---------|---------|---------|--------|----------|----------|---------|--------|---------|---------|---------|--------|--------|--------|---------|--------|
| Sao Tome and Principe | 1.04    | 1.18    | 0.41    |        | 5.19     | 5.53     | 0.15    |        | 6.87    | 9.43    | 1.29    |        | 0.12   | 0.16   | 1.20    |        |
|                       | (0.00,  | (0.00,  | (0.30,  | <0.001 | (0.03,   | (0.74,   | (-0.12, | 0.278  | (0.22,  | (2.60,  | (0.68,  | <0.001 | (0.00, | (0.00, | (0.23,  | 0.015  |
|                       | 31.68)  | 11.96)  | 0.51)   |        | 39.49)   | 19.37)   | 0.42)   |        | 41.31)  | 24.65)  | 1.91)   |        | 30.10) | 10.02) | 2.17)   |        |
| Saudi Arabia          | 2.07    | 3.21    | 1.53    |        | 13.93    | 20.92    | 1.40    |        | 8.78    | 11.12   | 0.81    |        | 0.15   | 0.19   | 0.88    |        |
|                       | (1.63,  | (2.90,  | (1.47,  | <0.001 | (12.74,  | (20.16,  | (1.16,  | <0.001 | (7.86,  | (10.50, | (0.58,  | <0.001 | (0.05, | (0.12, | (0.28,  | 0.004  |
|                       | 2.59)   | 3.56)   | 1.59)   |        | 15.22)   | 21.71)   | 1.64)   |        | 9.78)   | 11.77)  | 1.03)   |        | 0.34)  | 0.30)  | 1.48)   |        |
| Senegal               | 0.98    | 1.06    | 0.25    |        | 4.96     | 5.32     | 0.25    |        | 8.59    | 9.89    | 0.42    |        | 0.14   | 0.17   | 0.54    |        |
|                       | (0.48,  | (0.70,  | (0.12,  | <0.001 | (3.65,   | (4.42,   | (-0.05, | 0.103  | (7.01,  | (8.76,  | (-0.75, | 0.480  | (0.01, | (0.05, | (-0.87, | 0.452  |
|                       | 1.80)   | 1.54)   | 0.37)   |        | 6.59)    | 6.35)    | 0.56)   |        | 10.47)  | 11.14)  | 1.61)   |        | 0.64)  | 0.42)  | 1.97)   |        |
| Serbia                | 14.70   | 20.33   | 1.18    |        | 114.21   | 160.73   | 1.22    |        | 19.19   | 15.79   | -0.63   |        | 0.33   | 0.27   | -0.63   |        |
|                       | (12.99, | (18.13, | (1.08,  | <0.001 | (109.42, | (154.55, | (1.07,  | <0.001 | (17.22, | (13.86, | (-0.95, | <0.001 | (0.12, | (0.08, | (-0.99, | <0.001 |
|                       | 16.58)  | 22.74)  | 1.28)   |        | 119.17)  | 167.11)  | 1.37)   |        | 21.33)  | 17.92)  | -0.30)  |        | 0.73)  | 0.72)  | -0.28)  |        |
| Seychelles            | 1.38    | 1.54    | 0.38    |        | 8.15     | 8.76     | 0.26    |        | 8.47    | 9.73    | 0.62    |        | 0.15   | 0.16   | 0.33    |        |
|                       | (0.00,  | (0.00,  | (0.31,  | <0.001 | (0.28,   | (1.24,   | (-0.03, | 0.083  | (0.40,  | (1.30,  | (-0.19, | 0.131  | (0.00, | (0.00, | (-0.61, | 0.492  |
|                       | 32.24)  | 25.18)  | 0.44)   |        | 44.34)   | 35.62)   | 0.56)   |        | 44.23)  | 37.95)  | 1.44)   |        | 30.00) | 22.98) | 1.28)   |        |
| Sierra Leone          | 0.96    | 1.03    | 0.20    |        | 2.86     | 4.95     | 0.90    |        | 8.19    | 9.86    | 0.71    |        | 0.14   | 0.17   | 0.73    |        |
|                       | (0.34,  | (0.58,  | (0.00,  | 0.046  | (1.59,   | (3.82,   | (-1.77, | 0.512  | (6.08,  | (8.36,  | (0.30,  | 0.001  | (0.00, | (0.03, | (0.43,  | <0.001 |
|                       | 2.19)   | 1.71)   | 0.39)   |        | 4.73)    | 6.30)    | 3.65)   |        | 10.84)  | 11.56)  | 1.11)   |        | 0.95)  | 0.56)  | 1.04)   |        |
| Singapore             | 32.49   | 45.72   | 1.17    |        | 260.99   | 367.32   | 1.19    |        | 16.61   | 7.12    | -2.86   |        | 0.28   | 0.11   | -3.11   |        |
|                       | (28.63, | (41.93, | (1.13,  | <0.001 | (249.81, | (357.26, | (1.14,  | <0.001 | (13.86, | (5.56,  | (-3.26, | <0.001 | (0.04, | (0.00, | (-3.64, | <0.001 |
|                       | 36.75)  | 49.85)  | 1.22)   |        | 272.57)  | 377.68)  | 1.23)   |        | 19.77)  | 9.05)   | -2.46)  |        | 1.02)  | 0.75)  | -2.58)  |        |
| Slovakia              | 9.82    | 20.36   | 2.57    |        | 75.66    | 160.33   | 2.64    |        | 12.40   | 14.82   | 0.60    |        | 0.21   | 0.26   | 0.66    |        |
|                       | (8.04,  | (17.67, | (2.49,  | <0.001 | (70.65,  | (152.93, | (2.47,  | <0.001 | (10.39, | (12.53, | (-0.00, | 0.051  | (0.03, | (0.04, | (0.25,  | 0.001  |
|                       | 11.90)  | 23.42)  | 2.65)   |        | 80.95)   | 168.07)  | 2.81)   |        | 14.71)  | 17.48)  | 1.20)   |        | 0.75)  | 0.96)  | 1.07)   |        |
| Slovenia              | 14.29   | 28.26   | 2.39    |        | 111.59   | 223.73   | 2.46    |        | 11.81   | 9.86    | -0.60   |        | 0.21   | 0.17   | -0.73   |        |
|                       | (10.87, | (22.87, | (2.30,  | <0.001 | (101.83, | (208.78, | (2.29,  | <0.001 | (8.74,  | (6.80,  | (-1.27, | 0.084  | (0.00, | (0.00, | (-1.52, | 0.075  |
|                       | 18.51)  | 34.74)  | 2.49)   |        | 122.11)  | 239.68)  | 2.63)   |        | 15.69)  | 14.07)  | 0.08)   |        | 1.45)  | 1.95)  | 0.07)   |        |
| Solomon Islands       | 1.29    | 1.27    | -0.07   |        | 6.75     | 6.28     | -0.27   |        | 24.69   | 22.53   | -0.32   |        | 0.40   | 0.37   | -0.28   |        |
|                       | (0.01,  | (0.09,  | (-0.17, | 0.123  | (1.46,   | (2.54,   | (-0.44, | 0.002  | (13.85, | (15.09, | (-0.48, | <0.001 | (0.00, | (0.00, | (-0.44, | 0.001  |
|                       | 10.55)  | 5.55)   | 0.02)   |        | 19.49)   | 12.91)   | -0.10)  |        | 41.65)  | 32.54)  | -0.15)  |        | 8.95)  | 3.98)  | -0.11)  |        |
| Somalia               | 0.54    | 0.44    | -0.76   |        |          |          |         |        | 17.92   | 12.56   | -1.20   |        | 0.30   | 0.21   | -1.25   |        |
|                       | (0.20,  | (0.25,  | (-0.91, | <0.001 | —        | —        | —       | —      | (15.60, | (11.45, | (-1.44, | <0.001 | (0.07, | (0.09, | (-1.55, | <0.001 |
|                       | 1.20)   | 0.73)   | -0.60)  |        |          |          |         |        | 20.51)  | 13.76)  | -0.96)  |        | 0.85)  | 0.43)  | -0.95)  |        |



|                            |        |        |         |        |         |         |         |        |         |         |         |        |        |        |         |        |
|----------------------------|--------|--------|---------|--------|---------|---------|---------|--------|---------|---------|---------|--------|--------|--------|---------|--------|
|                            | 1.63   | 5.63   | 4.36    |        | 6.34    | 33.74   | 5.99    |        | 31.85   | 16.78   | -2.26   |        | 0.55   | 0.29   | -2.17   |        |
| South Africa               | (1.34, | (5.23, | (4.20,  | <0.001 | (5.74,  | (32.74, | (5.46,  | <0.001 | (30.55, | (16.07, | (-2.90, | <0.001 | (0.39, | (0.20, | (-2.88, | <0.001 |
|                            | 1.96)  | 6.07)  | 4.52)   |        | 6.99)   | 34.77)  | 6.52)   |        | 33.20)  | 17.52)  | -1.61)  |        | 0.76)  | 0.40)  | -1.46)  |        |
|                            | 1.03   | 0.93   | -0.37   |        | 5.36    | 2.94    | -2.61   |        | 13.89   | 9.23    | -1.35   |        | 0.24   | 0.15   | -1.57   |        |
| South Sudan                | (0.50, | (0.47, | (-0.48, | <0.001 | (3.93,  | (2.05,  | (-3.33, | <0.001 | (11.74, | (7.70,  | (-1.95, | <0.001 | (0.04, | (0.02, | (-1.99, | <0.001 |
|                            | 1.92)  | 1.65)  | -0.26)  |        | 7.15)   | 4.08)   | -1.88)  |        | 16.36)  | 10.99)  | -0.75)  |        | 0.83)  | 0.58)  | -1.14)  |        |
|                            | 0.68   | 1.16   | 1.81    |        | 1.95    | 4.29    | 2.51    |        | 29.85   | 11.34   | -3.40   |        | 0.50   | 0.19   | -3.61   |        |
| Spain                      | (0.50, | (0.92, | (1.64,  | <0.001 | (1.63,  | (3.88,  | (1.67,  | <0.001 | (28.62, | (10.55, | (-3.99, | <0.001 | (0.35, | (0.10, | (-4.18, | <0.001 |
|                            | 0.89)  | 1.44)  | 1.98)   |        | 2.30)   | 4.74)   | 3.37)   |        | 31.12)  | 12.19)  | -2.80)  |        | 0.69)  | 0.33)  | -3.04)  |        |
|                            | 1.05   | 1.26   | 0.65    |        | 6.12    | 7.44    | 0.71    |        | 11.85   | 7.85    | -1.42   |        | 0.20   | 0.13   | -1.33   |        |
| Sri Lanka                  | (0.74, | (0.93, | (0.60,  | <0.001 | (5.32,  | (6.63,  | (0.63,  | <0.001 | (10.75, | (7.00,  | (-2.73, | 0.038  | (0.08, | (0.05, | (-2.60, | 0.043  |
|                            | 1.44)  | 1.66)  | 0.71)   |        | 7.01)   | 8.32)   | 0.80)   |        | 13.02)  | 8.77)   | -0.08)  |        | 0.41)  | 0.31)  | -0.04)  |        |
|                            | 1.24   | 1.36   | 0.33    |        | 6.72    | 7.36    | 0.44    |        | 21.62   | 19.96   | -0.28   |        | 0.36   | 0.33   | -0.35   |        |
| Sudan                      | (0.88, | (1.11, | (0.24,  | <0.001 | (5.79,  | (6.71,  | (0.36,  | <0.001 | (20.10, | (19.00, | (-0.46, | 0.001  | (0.19, | (0.21, | (-0.46, | <0.001 |
|                            | 1.70)  | 1.66)  | 0.41)   |        | 7.74)   | 8.04)   | 0.51)   |        | 23.24)  | 20.97)  | -0.11)  |        | 0.64)  | 0.49)  | -0.25)  |        |
|                            | 1.76   | 2.47   | 1.10    |        | 8.36    | 11.65   | 0.63    |        | 30.73   | 26.57   | -0.47   |        | 0.52   | 0.45   | -0.60   |        |
| Suriname                   | (0.08, | (0.43, | (0.93,  | <0.001 | (2.74,  | (6.11,  | (-0.49, | 0.269  | (19.38, | (17.68, | (-2.05, | 0.562  | (0.00, | (0.00, | (-1.77, | 0.325  |
|                            | 9.53)  | 7.85)  | 1.27)   |        | 19.68)  | 20.24)  | 1.77)   |        | 46.95)  | 38.44)  | 1.13)   |        | 7.51)  | 4.54)  | 0.59)   |        |
|                            | 1.81   | 3.86   | 2.65    |        | 11.54   | 27.26   | 3.30    |        | 11.21   | 6.78    | -1.75   |        | 0.20   | 0.12   | -1.79   |        |
| Sweden                     | (1.20, | (3.00, | (2.48,  | <0.001 | (9.93,  | (24.93, | (2.82,  | <0.001 | (9.61,  | (5.61,  | (-2.28, | <0.001 | (0.04, | (0.02, | (-2.74, | <0.001 |
|                            | 2.62)  | 4.92)  | 2.82)   |        | 13.34)  | 29.77)  | 3.79)   |        | 13.02)  | 8.13)   | -1.22)  |        | 0.59)  | 0.46)  | -0.82)  |        |
|                            | 1.57   | 3.11   | 2.41    |        | 8.71    | 21.04   | 2.59    |        | 10.40   | 5.50    | -2.21   |        | 0.18   | 0.10   | -2.14   |        |
| Switzerland                | (0.99, | (2.29, | (2.00,  | <0.001 | (7.27,  | (18.92, | (1.71,  | <0.001 | (8.79,  | (4.40,  | (-3.00, | <0.001 | (0.03, | (0.01, | (-3.20, | <0.001 |
|                            | 2.41)  | 4.16)  | 2.82)   |        | 10.38)  | 23.38)  | 3.48)   |        | 12.26)  | 6.84)   | -1.41)  |        | 0.65)  | 0.51)  | -1.08)  |        |
|                            | 1.90   | 1.64   | -0.50   |        | 9.30    | 8.42    | -0.67   |        | 61.49   | 25.67   | -2.95   |        | 0.99   | 0.42   | -2.91   |        |
| Syrian Arab Republic       | (1.34, | (1.11, | (-0.66, | <0.001 | (7.92,  | (7.17,  | (-1.43, | 0.090  | (58.36, | (23.56, | (-3.36, | <0.001 | (0.63, | (0.19, | (-3.36, | <0.001 |
|                            | 2.62)  | 2.38)  | -0.34)  |        | 10.87)  | 9.86)   | 0.10)   |        | 64.76)  | 27.96)  | -2.54)  |        | 1.52)  | 0.86)  | -2.46)  |        |
|                            | 3.91   | 9.93   | 3.20    |        | 28.79   | 74.96   | 3.37    |        | 13.85   | 9.19    | -1.43   |        | 0.23   | 0.16   | -1.33   |        |
| Taiwan (Province of China) | (3.38, | (9.02, | (2.99,  | <0.001 | (27.30, | (72.50, | (3.01,  | <0.001 | (12.81, | (8.30,  | (-2.82, | 0.048  | (0.12, | (0.06, | (-2.42, | 0.018  |
|                            | 4.52)  | 10.92) | 3.41)   |        | 30.33)  | 77.50)  | 3.73)   |        | 14.95)  | 10.16)  | -0.02)  |        | 0.42)  | 0.35)  | -0.23)  |        |
|                            | 11.00  | 10.38  | -0.20   |        | 86.83   | 80.15   | -0.28   |        | 4.38    | 4.80    | 0.35    |        | 0.07   | 0.08   | 0.35    |        |
| Tajikistan                 | (8.95, | (9.01, | (-0.27, | <0.001 | (80.67, | (76.20, | (-0.41, | <0.001 | (3.15,  | (3.89,  | (0.08,  | 0.012  | (0.00, | (0.01, | (-0.30, | 0.288  |
|                            | 13.42) | 11.91) | -0.14)  |        | 93.36)  | 84.26)  | -0.15)  |        | 5.99)   | 5.87)   | 0.62)   |        | 0.64)  | 0.35)  | 1.00)   |        |

|                        |         |         |        |        |          |          |         |        |          |          |         |        |         |         |         |        |
|------------------------|---------|---------|--------|--------|----------|----------|---------|--------|----------|----------|---------|--------|---------|---------|---------|--------|
|                        | 1.10    | 1.36    | 0.72   |        | 6.53     | 7.89     | 0.69    |        | 3.81     | 7.71     | 2.53    |        | 0.07    | 0.13    | 2.31    |        |
| Thailand               | (0.93,  | (1.17,  | (0.64, | <0.001 | (6.07,   | (7.43,   | (0.53,  | <0.001 | (3.47,   | (7.23,   | (1.56,  | <0.001 | (0.03,  | (0.08,  | (1.08,  | <0.001 |
|                        | 1.31)   | 1.58)   | 0.80)  |        | 7.02)    | 8.38)    | 0.86)   |        | 4.18)    | 8.22)    | 3.51)   |        | 0.13)   | 0.21)   | 3.56)   |        |
|                        | 0.94    | 1.10    | 0.52   |        | 5.57     | 6.37     | 0.55    |        | 2.46     | 3.54     | 1.39    |        | 0.04    | 0.06    | 1.38    |        |
| Timor-Leste            | (0.06,  | (0.16,  | (0.44, | <0.001 | (2.34,   | (3.23,   | (0.12,  | 0.012  | (0.63,   | (1.53,   | (0.66,  | <0.001 | (0.00,  | (0.00,  | (-0.33, | 0.115  |
|                        | 4.48)   | 3.94)   | 0.61)  |        | 11.25)   | 11.31)   | 0.97)   |        | 6.77)    | 7.24)    | 2.13)   |        | 2.95)   | 2.27)   | 3.11)   |        |
|                        | 0.95    | 1.06    | 0.35   |        | 2.82     | 5.22     | 2.42    |        | 9.44     | 10.78    | 0.47    |        | 0.16    | 0.18    | 0.42    |        |
| Togo                   | (0.31,  | (0.59,  | (0.24, | <0.001 | (1.47,   | (4.03,   | (1.60,  | <0.001 | (7.09,   | (9.14,   | (0.15,  | 0.004  | (0.00,  | (0.03,  | (0.26,  | <0.001 |
|                        | 2.31)   | 1.78)   | 0.46)  |        | 4.91)    | 6.66)    | 3.25)   |        | 12.40)   | 12.63)   | 0.79)   |        | 1.12)   | 0.60)   | 0.57)   |        |
|                        | 1.50    | 1.76    |        |        |          |          |         |        |          |          |         |        | 0.35    | 0.32    |         |        |
| Tokelau                | (0.00,  | (0.00,  |        | <0.001 | (0.00,   | (0.00,   | (0.18,  | <0.001 | (0.00,   | (0.00,   | (-0.33, | <0.001 | (0.00,  | (0.00,  | (-0.39, | <0.001 |
|                        | 1586.71 | 1803.14 | 0.53   |        | 8.42     | 9.14     | 0.25    |        | 21.41    | 19.74    | -0.28   |        | 0.35    | 0.32    | -0.31   |        |
|                        | )       | )       | 0.62)  |        | 1601.05) | 1817.29) | 0.32)   |        | 1621.64) | 1835.02) | -0.24)  |        | )       | )       | -0.23)  |        |
|                        | 1.58    | 1.80    | 0.45   |        | 8.56     | 8.87     | -0.06   |        | 17.40    | 18.88    | 0.27    |        | 0.28    | 0.30    | 0.24    |        |
| Tonga                  | (0.00,  | (0.00,  | (0.38, | <0.001 | (0.21,   | (0.50,   | (-0.54, | 0.819  | (3.61,   | (4.73,   | (0.02,  | 0.035  | (0.00,  | (0.00,  | (0.03,  | 0.026  |
|                        | 36.87)  | 27.93)  | 0.53)  |        | 49.67)   | 40.73)   | 0.43)   |        | 59.28)   | 53.63)   | 0.52)   |        | 34.57)  | 25.03)  | 0.45)   |        |
|                        | 1.39    | 2.51    | 2.08   |        | 5.35     | 13.81    | 3.31    |        | 17.38    | 15.34    | -0.24   |        | 0.31    | 0.27    | -0.28   |        |
| Trinidad and<br>Tobago | (0.32,  | (1.01,  | (2.01, | <0.001 | (2.80,   | (10.04,  | (2.09,  | <0.001 | (12.53,  | (11.22,  | (-0.93, | 0.502  | (0.00,  | (0.00,  | (-1.06, | 0.485  |
|                        | 3.92)   | 5.41)   | 2.15)  |        | 9.31)    | 18.77)   | 4.54)   |        | 23.54)   | 20.69)   | 0.46)   |        | 2.24)   | 2.20)   | 0.51)   |        |
|                        | 1.69    | 1.92    | 0.45   |        | 8.70     | 11.77    | 1.02    |        | 18.57    | 17.98    | -0.14   |        | 0.31    | 0.30    | -0.12   |        |
| Tunisia                | (1.10,  | (1.40,  | (0.37, | <0.001 | (7.21,   | (10.45,  | (0.72,  | <0.001 | (16.55,  | (16.25,  | (-0.20, | <0.001 | (0.10,  | (0.12,  | (-0.30, | 0.217  |
|                        | 2.49)   | 2.59)   | 0.53)  |        | 10.43)   | 13.22)   | 1.32)   |        | 20.79)   | 19.85)   | -0.08)  |        | 0.75)   | 0.64)   | 0.07)   |        |
|                        | 2.44    | 2.66    | 0.31   |        | 15.68    | 15.58    | -0.01   |        | 36.45    | 13.88    | -3.29   |        | 0.62    | 0.24    | -3.26   |        |
| Turkey                 | (2.16,  | (2.43,  | (0.10, | 0.004  | (14.95,  | (15.03,  | (-0.35, | 0.965  | (35.36,  | (13.34,  | (-3.75, | <0.001 | (0.49,  | (0.17,  | (-3.66, | <0.001 |
|                        | 2.74)   | 2.91)   | 0.52)  |        | 16.44)   | 16.16)   | 0.33)   |        | 37.55)   | 14.44)   | -2.81)  |        | 0.78)   | 0.32)   | -2.85)  |        |
|                        | 11.79   | 14.83   | 0.79   |        | 92.99    | 116.16   | 0.74    |        | 3.71     | 5.67     | 1.71    |        | 0.06    | 0.09    | 1.79    |        |
| Turkmenistan           | (9.36,  | (12.65, | (0.76, | <0.001 | (85.70,  | (109.92, | (0.65,  | <0.001 | (2.44,   | (4.35,   | (0.95,  | <0.001 | (0.00,  | (0.00,  | (0.54,  | 0.005  |
|                        | 14.71)  | 17.29)  | 0.82)  |        | 100.77)  | 122.67)  | 0.83)   |        | 5.46)    | 7.30)    | 2.47)   |        | 0.76)   | 0.55)   | 3.05)   |        |
|                        | 1.30    | 1.47    | 0.41   |        | 7.01     | 7.49     | 0.26    |        | 29.96    | 27.79    | -0.28   |        | 0.48    | 0.45    | -0.23   |        |
| Tuvalu                 | (0.00,  | (0.00,  | (0.32, | <0.001 | (0.00,   | (0.00,   | (-0.02, | 0.068  | (0.03,   | (0.19,   | (-0.38, | <0.001 | (0.00,  | (0.00,  | (-0.45, | 0.049  |
|                        | 249.05) | 168.25) | 0.50)  |        | 260.76)  | 180.40)  | 0.54)   |        | 301.15)  | 215.15)  | -0.17)  |        | 247.41) | 166.22) | -0.00)  |        |
|                        | 0.56    | 0.63    | 0.39   |        |          | 1.84     |         |        | 13.55    | 14.38    | 0.16    |        | 0.23    | 0.24    | 0.05    |        |
| Uganda                 | (0.31,  | (0.45,  | (0.36, | <0.001 | —        | (1.49,   | —       | —      | (12.19,  | (13.49,  | (-0.29, | 0.492  | (0.08,  | (0.14,  | (-0.43, | 0.832  |

|                    |         |         |         |        |          |          |         |        |         |         |         |        |        |        |         |        |
|--------------------|---------|---------|---------|--------|----------|----------|---------|--------|---------|---------|---------|--------|--------|--------|---------|--------|
|                    | 0.95)   | 0.87)   | 0.43)   |        |          | 2.26)    |         | 15.03) | 15.32)  | 0.60)   |         | 0.52)  | 0.40)  | 0.54)  |         |        |
|                    | 16.22   | 23.50   | 1.28    |        | 127.21   | 186.61   | 1.32    | 2.45   | 9.46    | 4.31    |         | 0.04   | 0.16   | 4.38   |         |        |
| Ukraine            | (15.44, | (22.45, | (1.14,  | <0.001 | (125.03, | (183.77, | (1.20,  | <0.001 | (2.14,  | (8.77,  | (2.55,  | <0.001 | (0.01, | (0.08, | (2.40,  | <0.001 |
|                    | 17.04)  | 24.60)  | 1.41)   |        | 129.41)  | 189.49)  | 1.43)   |        | 2.78)   | 10.19)  | 6.10)   |        | 0.11)  | 0.29)  | 6.41)   |        |
| United Arab        | 3.28    | 5.02    | 1.48    |        | 20.10    | 34.23    | 1.84    |        | 28.17   | 26.69   | -0.19   |        | 0.46   | 0.45   | -0.12   |        |
| Emirates           | (2.10,  | (4.12,  | (1.43,  | <0.001 | (17.25,  | (32.44,  | (1.38,  | <0.001 | (23.94, | (24.17, | (-0.41, | 0.097  | (0.08, | (0.19, | (-0.39, | 0.384  |
|                    | 5.24)   | 6.16)   | 1.54)   |        | 23.58)   | 36.20)   | 2.30)   |        | 33.13)  | 29.46)  | 0.03)   |        | 1.87)  | 1.03)  | 0.15)   |        |
| United Kingdom     | 6.90    | 11.71   | 1.80    |        | 52.27    | 91.72    | 1.90    |        | 12.11   | 11.45   | -0.13   |        | 0.20   | 0.20   | -0.04   |        |
|                    | (6.41,  | (11.10, | (1.51,  | <0.001 | (50.91,  | (90.04,  | (1.59,  | <0.001 | (11.45, | (10.84, | (-0.74, | 0.683  | (0.13, | (0.12, | (-0.81, | 0.920  |
|                    | 7.42)   | 12.35)  | 2.09)   |        | 53.66)   | 93.42)   | 2.21)   |        | 12.79)  | 12.08)  | 0.49)   |        | 0.31)  | 0.30)  | 0.73)   |        |
| United Republic of | 0.64    | 0.69    | 0.26    |        | 1.83     | 1.98     | 0.23    |        | 20.32   | 13.93   | -1.33   |        | 0.34   | 0.23   | -1.43   |        |
| Tanzania           | (0.41,  | (0.53,  | (0.15,  | <0.001 | (1.40,   | (1.68,   | (0.06,  | 0.009  | (18.96, | (13.20, | (-1.51, | <0.001 | (0.18, | (0.15, | (-1.72, | <0.001 |
|                    | 0.96)   | 0.89)   | 0.38)   |        | 2.36)    | 2.31)    | 0.40)   |        | 21.76)  | 14.69)  | -1.15)  |        | 0.59)  | 0.35)  | -1.14)  |        |
| United States of   | 44.25   | 46.56   | 0.13    |        | 354.30   | 374.66   | 0.15    |        | 20.74   | 10.28   | -2.40   |        | 0.35   | 0.17   | -2.45   |        |
| America            | (43.69, | (46.00, | (0.02,  | 0.017  | (352.74, | (373.09, | (0.04,  | 0.007  | (20.36, | (10.02, | (-3.18, | <0.001 | (0.31, | (0.14, | (-3.45, | <0.001 |
|                    | 44.82)  | 47.12)  | 0.24)   |        | 355.87)  | 376.23)  | 0.26)   |        | 21.13)  | 10.55)  | -1.61)  |        | 0.41)  | 0.21)  | -1.44)  |        |
| United States      | 3.42    | 8.08    | 2.96    |        | 17.43    | 58.03    | 4.03    |        | 57.22   | 27.75   | -2.45   |        | 0.97   | 0.48   | -2.43   |        |
| Virgin Islands     | (0.01,  | (0.34,  | (2.67,  | <0.001 | (3.85,   | (26.13,  | (3.51,  | <0.001 | (28.06, | (7.71,  | (-3.08, | <0.001 | (0.00, | (0.00, | (-3.14, | <0.001 |
|                    | 28.13)  | 42.04)  | 3.25)   |        | 50.34)   | 112.77)  | 4.55)   |        | 104.41) | 71.87)  | -1.82)  |        | 23.59) | 28.62) | -1.72)  |        |
| Uruguay            | 2.54    | 4.97    | 2.32    |        | 17.07    | 36.49    | 2.61    |        | 10.68   | 13.16   | 0.75    |        | 0.19   | 0.23   | 0.75    |        |
|                    | (1.39,  | (3.35,  | (2.19,  | <0.001 | (13.79,  | (31.83,  | (2.01,  | <0.001 | (8.13,  | (10.43, | (0.31,  | 0.001  | (0.01, | (0.01, | (0.18,  | 0.010  |
|                    | 4.27)   | 7.10)   | 2.44)   |        | 20.91)   | 41.65)   | 3.22)   |        | 13.77)  | 16.40)  | 1.19)   |        | 1.03)  | 1.05)  | 1.32)   |        |
| Uzbekistan         | 10.56   | 12.63   | 0.63    |        | 83.44    | 99.10    | 0.60    |        | 2.88    | 8.44    | 3.81    |        | 0.05   | 0.14   | 3.91    |        |
|                    | (9.56,  | (11.82, | (0.60,  | <0.001 | (80.53,  | (96.80,  | (0.49,  | <0.001 | (2.38,  | (7.78,  | (2.94,  | <0.001 | (0.01, | (0.07, | (2.55,  | <0.001 |
|                    | 11.63)  | 13.48)  | 0.65)   |        | 86.43)   | 101.43)  | 0.71)   |        | 3.47)   | 9.14)   | 4.68)   |        | 0.19)  | 0.26)  | 5.28)   |        |
| Vanuatu            | 1.46    | 1.46    | -0.04   |        | 7.62     | 7.37     | -0.19   |        | 25.50   | 28.15   | 0.34    |        | 0.41   | 0.45   | 0.35    |        |
|                    | (0.00,  | (0.02,  | (-0.18, | 0.585  | (0.80,   | (1.87,   | (-0.40, | 0.068  | (10.53, | (16.17, | (0.08,  | 0.010  | (0.00, | (0.00, | (-0.06, | 0.097  |
|                    | 18.33)  | 10.24)  | 0.10)   |        | 29.10)   | 19.67)   | 0.01)   |        | 53.07)  | 46.04)  | 0.60)   |        | 16.33) | 8.41)  | 0.76)   |        |
| Venezuela          | 0.69    | 1.03    | 1.38    |        |          |          |         |        | 13.43   | 13.44   | 0.02    |        | 0.23   | 0.23   | -0.05   |        |
| (Bolivarian        | (0.45,  | (0.77,  | (1.28,  | <0.001 | —        | —        | —       | —      | (12.28, | (12.47, | (-0.51, | 0.946  | (0.10, | (0.12, | (-0.66, | 0.875  |
| Republic of)       | 1.02)   | 1.34)   | 1.48)   |        |          |          |         |        | 14.67)  | 14.47)  | 0.55)   |        | 0.45)  | 0.40)  | 0.57)   |        |
| Viet Nam           | 0.85    | 1.08    | 0.84    |        | 4.87     | 6.45     | 0.97    |        | 5.04    | 4.17    | -0.65   |        | 0.09   | 0.07   | -0.98   |        |
|                    | (0.69,  | (0.95,  | (0.77,  | <0.001 | (4.47,   | (6.12,   | (0.90,  | <0.001 | (4.65,  | (3.89,  | (-0.85, | <0.001 | (0.04, | (0.04, | (-1.60, | 0.002  |

|                                       |         |         |         |        |        |        |         |       |         |         |         |        |        |        |         |        |
|---------------------------------------|---------|---------|---------|--------|--------|--------|---------|-------|---------|---------|---------|--------|--------|--------|---------|--------|
|                                       | 1.03)   | 1.24)   | 0.90)   |        | 5.30)  | 6.79)  | 1.04)   |       | 5.45)   | 4.46)   | -0.46)  | 0.16)  | 0.12)  | -0.35) |         |        |
|                                       | 1.28    | 1.25    | -0.09   |        | 6.88   | 6.80   | -0.07   |       | 16.56   | 18.15   | 0.36    | 0.28   | 0.30   | 0.30   |         |        |
| Yemen                                 | (0.83,  | (0.98,  | (-0.16, | 0.022  | (5.73, | (6.14, | (-0.16, | 0.129 | (14.84, | (17.11, | (0.05,  | 0.021  | (0.10, | (0.18, | (-0.06, | 0.098  |
|                                       | 1.89)   | 1.56)   | -0.01)  |        | 8.20)  | 7.50)  | 0.02)   |       | 18.43)  | 19.23)  | 0.67)   |        | 0.64)  | 0.48)  | 0.66)   |        |
|                                       | 0.66    | 0.71    | 0.21    |        | 2.04   | 2.06   | 0.16    |       | 13.06   | 15.61   | 0.61    |        | 0.22   | 0.26   | 0.65    |        |
| Zambia                                | (0.28,  | (0.45,  | (0.13,  | <0.001 | (1.22, | (1.57, | (-0.04, | 0.115 | (11.15, | (14.31, | (0.37,  | <0.001 | (0.04, | (0.12, | (0.10,  | 0.021  |
|                                       | 1.37)   | 1.08)   | 0.29)   |        | 3.21)  | 2.67)  | 0.35)   |       | 15.25)  | 17.00)  | 0.86)   |        | 0.74)  | 0.51)  | 1.20)   |        |
|                                       | 0.84    | 0.90    | 0.20    |        | 2.38   | 2.19   | -0.20   |       | 14.74   | 19.89   | 1.05    |        | 0.24   | 0.33   | 1.12    |        |
| Zimbabwe                              | (0.44,  | (0.58,  | (-0.01, | 0.061  | (1.61, | (1.64, | (-0.78, | 0.510 | (12.97, | (18.29, | (0.47,  | <0.001 | (0.07, | (0.15, | (0.37,  | 0.003  |
|                                       | 1.46)   | 1.35)   | 0.40)   |        | 3.38)  | 2.86)  | 0.39)   |       | 16.71)  | 21.61)  | 1.64)   |        | 0.66)  | 0.63)  | 1.87)   |        |
| <b>Cardiomyopathy and myocarditis</b> |         |         |         |        |        |        |         |       |         |         |         |        |        |        |         |        |
| <b>Overall</b>                        |         |         |         |        |        |        |         |       |         |         |         |        |        |        |         |        |
|                                       | 8.60    | 8.77    | 0.07    |        |        |        |         |       | 36.58   | 28.53   | -0.83   |        | 0.60   | 0.47   | -0.84   |        |
| Afghanistan                           | (7.61,  | (8.28,  | (0.04,  | <0.001 | —      | —      | —       | —     | (34.48, | (27.62, | (-1.01, | <0.001 | (0.36, | (0.36, | (-1.04, | <0.001 |
|                                       | 9.71)   | 9.29)   | 0.09)   |        |        |        |         |       | 38.80)  | 29.46)  | -0.65)  |        | 0.98)  | 0.61)  | -0.64)  |        |
|                                       | 13.36   | 13.50   | 0.03    |        |        |        |         |       | 63.74   | 55.90   | -0.47   |        | 1.05   | 0.92   | -0.56   |        |
| Albania                               | (11.51, | (11.29, | (0.02,  | <0.001 | —      | —      | —       | —     | (59.60, | (51.28, | (-0.89, | 0.028  | (0.58, | (0.42, | (-1.07, | 0.030  |
|                                       | 15.44)  | 16.04)  | 0.05)   |        |        |        |         |       | 68.12)  | 60.83)  | -0.05)  |        | 1.77)  | 1.77)  | -0.05)  |        |
|                                       | 8.75    | 8.74    | -0.01   |        |        |        |         |       | 38.70   | 25.07   | -1.48   |        | 0.62   | 0.40   | -1.45   |        |
| Algeria                               | (8.16,  | (8.30,  | (-0.01, | <0.001 | —      | —      | —       | —     | (37.47, | (24.32, | (-1.69, | <0.001 | (0.47, | (0.31, | (-1.59, | <0.001 |
|                                       | 9.37)   | 9.20)   | -0.00)  |        |        |        |         |       | 39.97)  | 25.84)  | -1.28)  |        | 0.81)  | 0.51)  | -1.31)  |        |
|                                       | 10.88   | 10.87   | -0.01   |        |        |        |         |       | 129.37  | 145.32  | 0.42    |        | 2.21   | 2.47   | 0.39    |        |
| American Samoa                        | (1.46,  | (1.49,  | (-0.01, | 0.034  | —      | —      | —       | —     | (82.84, | (95.86, | (0.05,  | 0.027  | (0.00, | (0.00, | (-0.02, | 0.065  |
|                                       | 40.90)  | 40.84)  | 0.00)   |        |        |        |         |       | 193.90) | 212.66) | 0.79)   |        | 27.31) | 27.81) | 0.81)   |        |
|                                       | 12.83   | 12.58   | -0.07   |        |        |        |         |       | 45.27   | 33.96   | -0.98   |        | 0.72   | 0.55   | -0.93   |        |
| Andorra                               | (2.79,  | (2.68,  | (-0.11, | 0.001  | —      | —      | —       | —     | (22.92, | (15.51, | (-1.02, | <0.001 | (0.00, | (0.00, | (-1.02, | <0.001 |
|                                       | 40.03)  | 38.89)  | -0.03)  |        |        |        |         |       | 82.96)  | 67.16)  | -0.93)  |        | 21.61) | 20.15) | -0.83)  |        |
|                                       | 10.09   | 9.99    | -0.03   |        |        |        |         |       | 85.70   | 82.21   | -0.12   |        | 1.45   | 1.39   | -0.11   |        |
| Angola                                | (9.10,  | (9.40,  | (-0.04, | <0.001 | —      | —      | —       | —     | (82.72, | (80.46, | (-0.73, | 0.691  | (1.08, | (1.17, | (-0.69, | 0.700  |
|                                       | 11.16)  | 10.62)  | -0.03)  |        |        |        |         |       | 88.76)  | 83.99)  | 0.48)   |        | 1.90)  | 1.64)  | 0.46)   |        |
| Antigua and Barbuda                   | 9.18    | 9.21    | 0.01    |        |        |        |         |       | 57.91   | 55.70   | -0.02   |        | 0.97   | 0.93   | 0.17    |        |
|                                       | (1.39,  | (2.04,  | (0.00,  | 0.004  | —      | —      | —       | —     | (32.03, | (33.84, | (-1.33, | 0.972  | (0.00, | (0.00, | (-0.21, | 0.385  |

|            |         |         |         |        |        |        |         |        |          |          |         |        |        |        |         |        |
|------------|---------|---------|---------|--------|--------|--------|---------|--------|----------|----------|---------|--------|--------|--------|---------|--------|
|            | 31.81)  | 26.79)  | 0.02)   |        |        |        |         |        | 97.12)   | 86.91)   | 1.30)   |        | 18.39) | 13.54) | 0.55)   |        |
|            | 10.33   | 10.34   | 0.00    |        | 1.16   |        |         |        | 80.94    | 57.78    | -1.14   |        | 1.35   | 0.96   | -1.16   |        |
| Argentina  | (9.77,  | (9.87,  | (-0.00, | 0.218  | (0.98, | —      | —       | —      | (79.34,  | (56.66,  | (-1.30, | <0.001 | (1.15, | (0.82, | (-1.34, | <0.001 |
|            | 10.92)  | 10.83)  | 0.01)   |        | 1.37)  |        |         |        | 82.56)   | 58.92)   | -0.98)  |        | 1.57)  | 1.11)  | -0.98)  |        |
|            | 11.50   | 11.54   | 0.01    |        |        |        |         |        | 60.59    | 33.02    | -2.08   |        | 1.04   | 0.56   | -2.11   |        |
| Armenia    | (9.81,  | (9.60,  | (0.01,  | <0.001 | —      | —      | —       | —      | (56.64,  | (29.82,  | (-3.66, | 0.011  | (0.58, | (0.22, | (-3.71, | 0.011  |
|            | 13.40)  | 13.79)  | 0.02)   |        |        |        |         |        | 64.75)   | 36.53)   | -0.48)  |        | 1.72)  | 1.27)  | -0.49)  |        |
|            | 12.13   | 12.12   | -0.00   |        |        |        |         |        | 80.63    | 45.51    | -1.93   |        | 1.29   | 0.74   | -1.88   |        |
| Australia  | (11.32, | (11.38, | (-0.01, | 0.112  | —      | —      | —       | —      | (78.51,  | (44.10,  | (-2.35, | <0.001 | (1.04, | (0.57, | (-2.37, | <0.001 |
|            | 12.99)  | 12.89)  | 0.00)   |        |        |        |         |        | 82.79)   | 46.96)   | -1.51)  |        | 1.59)  | 0.94)  | -1.40)  |        |
|            | 15.55   | 15.21   | -0.08   |        |        |        |         |        | 75.79    | 21.91    | -4.18   |        | 1.23   | 0.34   | -4.33   |        |
| Austria    | (14.17, | (13.79, | (-0.10, | <0.001 | —      | —      | —       | —      | (72.70,  | (20.23,  | (-4.50, | <0.001 | (0.87, | (0.16, | (-4.74, | <0.001 |
|            | 17.04)  | 16.74)  | -0.05)  |        |        |        |         |        | 78.99)   | 23.71)   | -3.85)  |        | 1.71)  | 0.65)  | -3.92)  |        |
|            | 11.47   | 11.58   | 0.03    |        | 1.99   | 1.96   | -0.19   |        | 281.00   | 257.16   | -0.46   |        | 4.80   | 4.36   | -0.30   |        |
| Azerbaijan | (10.30, | (10.58, | (0.03,  | <0.001 | (1.47, | (1.58, | (-0.27, | <0.001 | (275.03, | (252.42, | (-1.20, | 0.222  | (4.04, | (3.77, | (-0.99, | 0.399  |
|            | 12.73)  | 12.67)  | 0.04)   |        | 2.64)  | 2.43)  | -0.11)  |        | 287.09)  | 261.97)  | 0.28)   |        | 5.66)  | 5.03)  | 0.40)   |        |
|            | 9.20    | 9.20    | 0.00    |        |        |        |         |        | 140.54   | 167.11   | 0.60    |        | 2.40   | 2.90   | 0.63    |        |
| Bahamas    | (4.52,  | (5.01,  | (-0.01, | 0.673  | —      | —      | —       | —      | (119.36, | (147.21, | (0.14,  | 0.011  | (0.43, | (0.86, | (0.12,  | 0.015  |
|            | 16.98)  | 15.56)  | 0.01)   |        |        |        |         |        | 164.59)  | 189.02)  | 1.07)   |        | 7.84)  | 7.23)  | 1.14)   |        |
|            | 9.01    | 8.96    | -0.02   |        |        |        |         |        | 56.48    | 36.12    | -1.56   |        | 0.86   | 0.54   | -1.51   |        |
| Bahrain    | (5.67,  | (6.59,  | (-0.06, | 0.208  | —      | —      | —       | —      | (47.05,  | (30.96,  | (-1.83, | <0.001 | (0.10, | (0.10, | (-1.87, | <0.001 |
|            | 13.89)  | 11.99)  | 0.01)   |        |        |        |         |        | 67.42)   | 41.96)   | -1.28)  |        | 3.53)  | 1.81)  | -1.15)  |        |
|            | 10.10   | 10.01   | -0.03   |        |        |        |         |        | 12.12    | 12.19    | 0.06    |        | 0.20   | 0.20   | 0.04    |        |
| Bangladesh | (9.79,  | (9.77,  | (-0.03, | <0.001 | —      | —      | —       | —      | (11.78,  | (11.92,  | (-0.27, | 0.740  | (0.16, | (0.17, | (-0.68, | 0.921  |
|            | 10.41)  | 10.25)  | -0.03)  |        |        |        |         |        | 12.47)   | 12.45)   | 0.38)   |        | 0.25)  | 0.24)  | 0.75)   |        |
|            | 9.21    | 9.21    | 0.00    |        |        |        |         |        | 91.10    | 78.59    | -0.55   |        | 1.54   | 1.33   | -0.62   |        |
| Barbados   | (4.43,  | (4.25,  | (-0.00, | 0.996  | —      | —      | —       | —      | (74.09,  | (62.32,  | (-1.24, | 0.121  | (0.14, | (0.08, | (-1.23, | 0.048  |
|            | 17.00)  | 17.56)  | 0.00)   |        |        |        |         |        | 110.91)  | 97.97)   | 0.15)   |        | 6.29)  | 6.37)  | -0.01)  |        |
|            | 12.45   | 12.53   | 0.02    |        |        | 2.02   |         |        | 248.62   | 345.75   | 1.08    |        | 4.38   | 6.15   | 1.13    |        |
| Belarus    | (11.37, | (11.26, | (0.02,  | <0.001 | —      | (1.61, | —       | —      | (243.88, | (339.71, | (0.12,  | 0.027  | (3.77, | (5.38, | (0.31,  | 0.007  |
|            | 13.61)  | 13.91)  | 0.03)   |        |        | 2.53)  |         |        | 253.44)  | 351.90)  | 2.05)   |        | 5.07)  | 7.04)  | 1.97)   |        |
|            | 10.57   | 10.52   | -0.03   |        |        |        |         |        | 31.13    | 15.55    | -2.38   |        | 0.48   | 0.23   | -2.47   |        |
| Belgium    | (9.55,  | (9.47,  | (-0.11, | 0.363  | —      | —      | —       | —      | (29.36,  | (14.28,  | (-2.69, | <0.001 | (0.28, | (0.10, | (-2.86, | <0.001 |

|                   |         |         |         |        |        |        |         |        |          |          |         |        |        |        |         |        |
|-------------------|---------|---------|---------|--------|--------|--------|---------|--------|----------|----------|---------|--------|--------|--------|---------|--------|
|                   | 11.67)  | 11.65)  | 0.04)   |        |        |        |         |        | 32.99)   | 16.90)   | -2.07)  |        | 0.77)  | 0.46)  | -2.08)  |        |
|                   | 9.25)   | 9.20)   | -0.02)  |        |        |        |         |        | 69.38)   | 89.64)   | 0.85)   |        | 1.16)  | 1.51)  | 0.86)   |        |
| Belize            | (3.46,  | (5.26,  | (-0.02, | <0.001 | —      | —      | —       | —      | (50.63,  | (76.00,  | (0.38,  | <0.001 | (0.01, | (0.26, | (0.36,  | 0.001  |
|                   | 20.89)  | 15.05)  | -0.02)  |        |        |        |         |        | 93.42)   | 105.09)  | 1.33)   |        | 9.32)  | 4.90)  | 1.35)   |        |
|                   | 9.91)   | 10.01)  | 0.03)   |        |        |        |         |        | 72.78)   | 58.47)   | -0.72)  |        | 1.21)  | 0.96)  | -0.77)  |        |
| Benin             | (8.44,  | (9.11,  | (0.03,  | <0.001 | —      | —      | —       | —      | (68.68,  | (56.28,  | (-0.82, | <0.001 | (0.73, | (0.70, | (-0.88, | <0.001 |
|                   | 11.59)  | 10.98)  | 0.03)   |        |        |        |         |        | 77.08)   | 60.73)   | -0.63)  |        | 1.90)  | 1.30)  | -0.66)  |        |
|                   | 9.22)   | 9.21)   | -0.01)  |        |        |        |         |        | 55.14)   | 41.42)   | -1.03)  |        | 0.91)  | 0.68)  | -1.03)  |        |
| Bermuda           | (1.41,  | (0.80,  | (-0.01, | 0.109  | —      | —      | —       | —      | (30.49,  | (17.60,  | (-1.20, | <0.001 | (0.00, | (0.00, | (-1.23, | <0.001 |
|                   | 34.41)  | 41.22)  | 0.00)   |        |        |        |         |        | 94.56)   | 85.75)   | -0.85)  |        | 21.67) | 27.33) | -0.84)  |        |
|                   | 10.19)  | 10.16)  | -0.01)  |        |        |        |         |        | 6.71)    | 7.27)    | 0.26)   |        | 0.11)  | 0.12)  | 0.26)   |        |
| Bhutan            | (6.54,  | (7.10,  | (-0.02, | 0.067  | —      | —      | —       | —      | (3.79,   | (4.73,   | (0.13,  | <0.001 | (0.00, | (0.00, | (-0.18, | 0.241  |
|                   | 15.37)  | 14.13)  | 0.00)   |        |        |        |         |        | 11.22)   | 10.73)   | 0.39)   |        | 2.29)  | 1.37)  | 0.70)   |        |
| Bolivia           | 9.07)   | 9.11)   | 0.02)   |        |        |        |         |        | 30.34)   | 24.34)   | -0.75)  |        | 0.50)  | 0.40)  | -0.78)  |        |
| (Plurinational    | (7.89,  | (8.28,  | (0.01,  | <0.001 | —      | —      | —       | —      | (28.16,  | (22.97,  | (-0.83, | <0.001 | (0.25, | (0.24, | (-0.93, | <0.001 |
| State of)         | 10.38)  | 10.01)  | 0.02)   |        |        |        |         |        | 32.65)   | 25.78)   | -0.67)  |        | 0.89)  | 0.62)  | -0.63)  |        |
|                   | 13.50)  | 13.36)  | -0.04)  |        |        |        |         |        | 59.64)   | 65.26)   | 0.28)   |        | 1.00)  | 1.10)  | 0.30)   |        |
| Bosnia and        | (11.91, | (11.23, | (-0.07, | 0.002  | —      | —      | —       | —      | (56.26,  | (60.54,  | (-0.19, | 0.247  | (0.61, | (0.57, | (-0.07, | 0.113  |
| Herzegovina       | 15.25)  | 15.80)  | -0.02)  |        |        |        |         |        | 63.18)   | 70.28)   | 0.76)   |        | 1.56)  | 1.96)  | 0.67)   |        |
|                   | 9.95)   | 10.06)  | 0.04)   |        |        |        |         |        | 78.73)   | 70.51)   | -0.39)  |        | 1.31)  | 1.17)  | -0.43)  |        |
| Botswana          | (7.31,  | (8.24,  | (0.03,  | <0.001 | —      | —      | —       | —      | (70.90,  | (65.54,  | (-0.55, | <0.001 | (0.48, | (0.61, | (-0.56, | <0.001 |
|                   | 13.32)  | 12.17)  | 0.04)   |        |        |        |         |        | 87.26)   | 75.76)   | -0.24)  |        | 2.97)  | 2.04)  | -0.30)  |        |
|                   | 10.24)  | 10.26)  | 0.01)   |        |        |        |         |        | 116.55)  | 84.85)   | -1.11)  |        | 2.01)  | 1.44)  | -1.17)  |        |
| Brazil            | (9.99,  | (10.05, | (0.01,  | <0.001 | —      | —      | —       | —      | (115.68, | (84.25,  | (-1.35, | <0.001 | (1.89, | (1.36, | (-1.49, | <0.001 |
|                   | 10.50)  | 10.48)  | 0.01)   |        |        |        |         |        | 117.42)  | 85.46)   | -0.87)  |        | 2.13)  | 1.52)  | -0.86)  |        |
|                   | 15.10)  | 15.15)  | 0.01)   |        | 6.31)  | 3.32)  | -2.32)  |        | 208.73)  | 140.98)  | -1.33)  |        | 3.40)  | 2.33)  | -1.30)  |        |
| Brunei Darussalam | (9.03,  | (10.24, | (-0.00, | 0.103  | (2.70, | (1.39, | (-2.88, | <0.001 | (184.00, | (125.27, | (-1.55, | <0.001 | (0.96, | (0.75, | (-1.64, | <0.001 |
|                   | 23.84)  | 21.74)  | 0.02)   |        | 12.69) | 6.99)  | -1.76)  |        | 235.96)  | 158.26)  | -1.10)  |        | 8.72)  | 5.76)  | -0.96)  |        |
|                   | 13.33)  | 13.46)  | 0.04)   |        |        |        |         |        | 39.83)   | 69.37)   | 2.00)   |        | 0.66)  | 1.16)  | 2.03)   |        |
| Bulgaria          | (12.05, | (11.86, | (0.03,  | <0.001 | —      | —      | —       | —      | (37.61,  | (65.75,  | (1.69,  | <0.001 | (0.40, | (0.74, | (1.73,  | <0.001 |
|                   | 14.71)  | 15.24)  | 0.04)   |        |        |        |         |        | 42.15)   | 73.16)   | 2.32)   |        | 1.02)  | 1.76)  | 2.34)   |        |
|                   | 9.89)   | 9.97)   | 0.03)   |        |        |        |         |        | 63.87)   | 54.33)   | -0.54)  |        | 1.07)  | 0.90)  | -0.58)  |        |
| Burkina Faso      | (8.79,  | (9.29,  | (0.03,  | <0.001 | —      | —      | —       | —      | (60.97,  | (52.72,  | (-0.76, | <0.001 | (0.72, | (0.70, | (-0.88, | <0.001 |

|                             |         |         |         |        |          |         |         |        |         |         |         |        |        |        |         |        |
|-----------------------------|---------|---------|---------|--------|----------|---------|---------|--------|---------|---------|---------|--------|--------|--------|---------|--------|
|                             | 11.10)  | 10.69)  | 0.03)   |        |          |         |         |        | 66.88)  | 55.97)  | -0.32)  |        | 1.54)  | 1.14)  | -0.28)  |        |
|                             | 10.02   | 10.03   | 0.01    |        |          |         |         |        | 58.13   | 44.58   | -0.90   |        | 0.99   | 0.76   | -0.91   |        |
| Burundi                     | (8.67,  | (9.12,  | (0.00,  | 0.024  | —        | —       | —       | —      | (54.73, | (42.58, | (-1.09, | <0.001 | (0.59, | (0.52, | (-1.16, | <0.001 |
|                             | 11.53)  | 11.02)  | 0.01)   |        |          |         |         |        | 61.69)  | 46.64)  | -0.70)  |        | 1.58)  | 1.08)  | -0.67)  |        |
|                             | 9.94    | 10.14   | 0.07    |        |          |         |         |        | 42.67   | 32.42   | -0.97   |        | 0.70   | 0.52   | -1.18   |        |
| Cabo Verde                  | (5.04,  | (6.57,  | (0.06,  | <0.001 | —        | —       | —       | —      | (31.62, | (25.73, | (-1.20, | <0.001 | (0.01, | (0.03, | (-1.37, | <0.001 |
|                             | 18.44)  | 14.99)  | 0.07)   |        |          |         |         |        | 56.99)  | 40.36)  | -0.73)  |        | 6.01)  | 2.53)  | -0.98)  |        |
|                             | 10.03   | 10.26   | 0.08    |        |          |         |         |        | 26.03   | 24.56   | -0.18   |        | 0.44   | 0.42   | -0.16   |        |
| Cambodia                    | (9.04,  | (9.53,  | (0.07,  | <0.001 | —        | —       | —       | —      | (24.35, | (23.42, | (-0.25, | <0.001 | (0.25, | (0.28, | (-0.21, | <0.001 |
|                             | 11.11)  | 11.04)  | 0.08)   |        |          |         |         |        | 27.81)  | 25.75)  | -0.11)  |        | 0.74)  | 0.60)  | -0.11)  |        |
|                             | 9.98    | 10.03   | 0.02    |        |          |         |         |        | 74.43   | 66.12   | -0.43   |        | 1.24   | 1.09   | -0.46   |        |
| Cameroon                    | (8.97,  | (9.46,  | (0.01,  | <0.001 | —        | —       | —       | —      | (71.59, | (64.65, | (-0.56, | <0.001 | (0.90, | (0.91, | (-0.64, | <0.001 |
|                             | 11.09)  | 10.63)  | 0.02)   |        |          |         |         |        | 77.36)  | 67.63)  | -0.30)  |        | 1.69)  | 1.31)  | -0.27)  |        |
|                             | 13.74   | 13.76   | 0.01    |        | 117.15   | 69.35   | -1.80   |        | 55.85   | 44.49   | -0.80   |        | 0.71   | 0.59   | -0.61   |        |
| Canada                      | (13.05, | (13.09, | (0.00,  | <0.001 | (115.19, | (67.87, | (-2.06, | <0.001 | (54.48, | (43.29, | (-1.00, | <0.001 | (0.56, | (0.46, | (-0.87, | <0.001 |
|                             | 14.45)  | 14.46)  | 0.01)   |        | 119.14)  | 70.86)  | -1.54)  |        | 57.26)  | 45.71)  | -0.60)  |        | 0.89)  | 0.74)  | -0.36)  |        |
|                             | 10.03   | 10.00   | -0.01   |        |          |         |         |        | 84.51   | 77.77   | -0.35   |        | 1.41   | 1.30   | -0.34   |        |
| Central African<br>Republic | (8.14,  | (8.65,  | (-0.02, | 0.008  | —        | —       | —       | —      | (78.79, | (73.91, | (-0.67, | 0.038  | (0.76, | (0.84, | (-0.65, | 0.030  |
|                             | 12.26)  | 11.51)  | -0.00)  |        |          |         |         |        | 90.58)  | 81.79)  | -0.02)  |        | 2.46)  | 1.93)  | -0.03)  |        |
|                             | 9.96    | 9.98    | 0.01    |        |          |         |         |        | 69.09   | 58.43   | -0.51   |        | 1.15   | 0.96   | -0.49   |        |
| Chad                        | (8.61,  | (9.14,  | (0.01,  | <0.001 | —        | —       | —       | —      | (65.44, | (56.38, | (-0.75, | <0.001 | (0.72, | (0.71, | (-0.78, | 0.001  |
|                             | 11.47)  | 10.88)  | 0.01)   |        |          |         |         |        | 72.90)  | 60.53)  | -0.26)  |        | 1.75)  | 1.27)  | -0.21)  |        |
|                             | 10.31   | 10.40   | 0.03    |        | 5.35     | 3.35    | -1.65   |        | 47.31   | 45.20   | -0.13   |        | 0.77   | 0.73   | -0.14   |        |
| Chile                       | (9.49,  | (9.65,  | (0.02,  | <0.001 | (4.78,   | (2.94,  | (-2.28, | <0.001 | (45.52, | (43.62, | (-0.45, | 0.453  | (0.55, | (0.54, | (-0.52, | 0.452  |
|                             | 11.18)  | 11.20)  | 0.04)   |        | 5.97)    | 3.81)   | -1.01)  |        | 49.16)  | 46.82)  | 0.20)   |        | 1.04)  | 0.96)  | 0.23)   |        |
|                             | 12.88   | 12.01   | -0.24   |        |          |         |         |        | 28.92   | 25.24   | -0.46   |        | 0.46   | 0.40   | -0.37   |        |
| China                       | (12.79, | (11.91, | (-0.26, | <0.001 | —        | —       | —       | —      | (28.77, | (25.10, | (-0.98, | 0.077  | (0.45, | (0.39, | (-0.65, | 0.008  |
|                             | 12.98)  | 12.10)  | -0.23)  |        |          |         |         |        | 29.06)  | 25.39)  | 0.05)   |        | 0.48)  | 0.42)  | -0.10)  |        |
|                             | 9.18    | 9.23    | 0.02    |        |          |         |         |        | 29.03   | 22.83   | -0.84   |        | 0.48   | 0.37   | -0.89   |        |
| Colombia                    | (8.68,  | (8.80,  | (0.01,  | <0.001 | —        | —       | —       | —      | (28.13, | (22.16, | (-1.10, | <0.001 | (0.37, | (0.29, | (-1.18, | <0.001 |
|                             | 9.71)   | 9.67)   | 0.03)   |        |          |         |         |        | 29.96)  | 23.52)  | -0.58)  |        | 0.61)  | 0.47)  | -0.60)  |        |
|                             | 10.02   | 10.09   | 0.03    |        |          |         |         |        | 44.34   | 41.46   | -0.20   |        | 0.76   | 0.71   | -0.21   |        |
| Comoros                     | (5.68,  | (6.77,  | (0.02,  | <0.001 | —        | —       | —       | —      | (34.10, | (34.27, | (-2.63, | 0.871  | (0.02, | (0.08, | (-2.53, | 0.865  |

|                   |         |         |         |        |   |   |   |   |         |         |         |        |        |        |         |        |
|-------------------|---------|---------|---------|--------|---|---|---|---|---------|---------|---------|--------|--------|--------|---------|--------|
|                   | 16.71)  | 14.53)  | 0.03)   |        |   |   |   |   | 56.90)  | 49.76)  | 2.28)   |        | 4.47)  | 2.66)  | 2.17)   |        |
|                   | 10.04   | 10.02   | -0.01   |        |   |   |   |   | 92.99   | 75.27   | -0.76   |        | 1.57   | 1.27   | -0.76   |        |
| Congo             | (8.04,  | (8.71,  | (-0.01, | 0.002  | — | — | — | — | (86.58, | (71.58, | (-1.54, | 0.057  | (0.83, | (0.83, | (-1.55, | 0.064  |
|                   | 12.42)  | 11.48)  | -0.00)  |        |   |   |   |   | 99.79)  | 79.11)  | 0.02)   |        | 2.74)  | 1.86)  | 0.04)   |        |
|                   | 10.96   | 10.70   | -0.08   |        |   |   |   |   | 25.45   | 20.60   | -0.72   |        | 0.42   | 0.34   | -0.78   |        |
| Cook Islands      | (0.14,  | (0.04,  | (-0.09, | <0.001 | — | — | — | — | (2.77,  | (0.87,  | (-0.83, | <0.001 | (0.00, | (0.00, | (-1.08, | <0.001 |
|                   | 79.29)  | 86.71)  | -0.07)  |        |   |   |   |   | 102.60) | 103.95) | -0.61)  |        | 61.29) | 67.23) | -0.48)  |        |
|                   | 9.22    | 9.19    | -0.01   |        |   |   |   |   | 66.45   | 59.07   | -0.36   |        | 1.10   | 0.98   | -0.37   |        |
| Costa Rica        | (7.61,  | (7.88,  | (-0.01, | <0.001 | — | — | — | — | (61.99, | (55.70, | (-1.37, | 0.484  | (0.59, | (0.59, | (-1.01, | 0.270  |
|                   | 11.08)  | 10.65)  | -0.01)  |        |   |   |   |   | 71.16)  | 62.59)  | 0.66)   |        | 1.89)  | 1.54)  | 0.29)   |        |
|                   | 10.10   | 10.09   | -0.00   |        |   |   |   |   | 75.78   | 58.14   | -0.92   |        | 1.25   | 0.95   | -0.96   |        |
| Cote d'Ivoire     | (9.18,  | (9.49,  | (-0.01, | 0.208  | — | — | — | — | (73.26, | (56.70, | (-1.06, | <0.001 | (0.94, | (0.77, | (-1.12, | <0.001 |
|                   | 11.09)  | 10.71)  | 0.00)   |        |   |   |   |   | 78.38)  | 59.61)  | -0.77)  |        | 1.63)  | 1.16)  | -0.81)  |        |
|                   | 12.65   | 12.77   | 0.01    |        |   |   |   |   | 38.59   | 29.74   | -0.77   |        | 0.64   | 0.50   | -0.74   |        |
| Croatia           | (11.06, | (10.88, | (-0.04, | 0.611  | — | — | — | — | (35.82, | (26.92, | (-1.49, | 0.040  | (0.33, | (0.20, | (-1.50, | 0.059  |
|                   | 14.41)  | 14.93)  | 0.07)   |        |   |   |   |   | 41.52)  | 32.81)  | -0.03)  |        | 1.13)  | 1.09)  | 0.03)   |        |
|                   | 9.24    | 9.28    | 0.01    |        |   |   |   |   | 46.07   | 52.82   | 0.50    |        | 0.77   | 0.89   | 0.54    |        |
| Cuba              | (8.39,  | (8.31,  | (0.01,  | <0.001 | — | — | — | — | (44.11, | (50.50, | (-0.09, | 0.095  | (0.53, | (0.61, | (-0.08, | 0.087  |
|                   | 10.16)  | 10.33)  | 0.02)   |        |   |   |   |   | 48.10)  | 55.22)  | 1.09)   |        | 1.08)  | 1.25)  | 1.17)   |        |
|                   | 12.53   | 12.48   | -0.01   |        |   |   |   |   | 49.51   | 35.44   | -1.19   |        | 0.78   | 0.57   | -1.14   |        |
| Cyprus            | (8.89,  | (9.50,  | (-0.07, | 0.809  | — | — | — | — | (41.94, | (30.33, | (-1.38, | <0.001 | (0.12, | (0.11, | (-1.40, | <0.001 |
|                   | 17.20)  | 16.26)  | 0.06)   |        |   |   |   |   | 58.09)  | 41.31)  | -0.99)  |        | 2.64)  | 2.04)  | -0.87)  |        |
|                   | 15.04   | 15.11   | 0.02    |        |   |   |   |   | 66.74   | 45.20   | -1.36   |        | 1.12   | 0.76   | -1.39   |        |
| Czechia           | (13.81, | (13.73, | (0.01,  | <0.001 | — | — | — | — | (64.15, | (42.89, | (-1.61, | <0.001 | (0.80, | (0.49, | (-1.99, | <0.001 |
|                   | 16.35)  | 16.60)  | 0.02)   |        |   |   |   |   | 69.41)  | 47.62)  | -1.10)  |        | 1.51)  | 1.14)  | -0.79)  |        |
| Democratic        | 10.85   | 11.15   | 0.10    |        |   |   |   |   | 35.00   | 39.33   | 0.40    |        | 0.57   | 0.64   | 0.37    |        |
| People's Republic | (10.14, | (10.50, | (0.09,  | <0.001 | — | — | — | — | (33.73, | (38.11, | (0.33,  | <0.001 | (0.42, | (0.49, | (0.28,  | <0.001 |
| of Korea          | 11.59)  | 11.83)  | 0.11)   |        |   |   |   |   | 36.32)  | 40.58)  | 0.47)   |        | 0.76)  | 0.81)  | 0.47)   |        |
| Democratic        | 10.05   | 10.09   | 0.01    |        |   |   |   |   | 77.82   | 76.24   | -0.12   |        | 1.32   | 1.29   | -0.12   |        |
| Republic of the   | (9.52,  | (9.75,  | (0.01,  | <0.001 | — | — | — | — | (76.30, | (75.28, | (-0.29, | 0.199  | (1.12, | (1.17, | (-0.30, | 0.176  |
| Congo             | 10.60)  | 10.44)  | 0.02)   |        |   |   |   |   | 79.36)  | 77.20)  | 0.06)   |        | 1.54)  | 1.42)  | 0.06)   |        |
|                   | 11.78   | 11.76   | -0.01   |        |   |   |   |   | 39.94   | 24.07   | -1.76   |        | 0.65   | 0.39   | -1.76   |        |
| Denmark           | (10.29, | (10.23, | (-0.02, | 0.153  | — | — | — | — | (37.17, | (21.88, | (-2.19, | <0.001 | (0.35, | (0.16, | (-2.31, | <0.001 |



|                   |         |         |         |        |   |        |   |   |          |          |         |        |        |        |         |        |
|-------------------|---------|---------|---------|--------|---|--------|---|---|----------|----------|---------|--------|--------|--------|---------|--------|
|                   | 13.43)  | 13.46)  | 0.00)   |        |   |        |   |   | 42.87)   | 26.44)   | -1.33)  |        | 1.14)  | 0.82)  | -1.20)  |        |
|                   | 10.23   | 10.13   | -0.04   |        |   |        |   |   | 53.93    | 45.85    | -0.61   |        | 0.93   | 0.79   | -0.47   |        |
| Djibouti          | (6.14,  | (7.55,  | (-0.05, | <0.001 | — | —      | — | — | (43.42,  | (40.18,  | (-0.87, | <0.001 | (0.07, | (0.22, | (-1.05, | 0.109  |
|                   | 16.27)  | 13.32)  | -0.02)  |        |   |        |   |   | 66.36)   | 52.12)   | -0.36)  |        | 4.19)  | 2.04)  | 0.11)   |        |
|                   | 9.30    | 9.27    | -0.01   |        |   |        |   |   | 242.59   | 223.37   | -0.30   |        | 4.13   | 3.82   | -0.27   |        |
| Dominica          | (1.59,  | (1.45,  | (-0.02, | <0.001 | — | —      | — | — | (186.77, | (169.33, | (-0.56, | 0.024  | (0.13, | (0.09, | (-0.54, | 0.043  |
|                   | 31.46)  | 30.62)  | -0.01)  |        |   |        |   |   | 310.73)  | 289.28)  | -0.04)  |        | 23.73) | 21.79) | -0.01)  |        |
| Dominican         | 9.17    | 9.25    | 0.03    |        |   |        |   |   | 31.42    | 37.32    | 0.64    |        | 0.52   | 0.63   | 0.70    |        |
| Republic          | (8.09,  | (8.38,  | (0.02,  | <0.001 | — | —      | — | — | (29.38,  | (35.55,  | (0.35,  | <0.001 | (0.29, | (0.42, | (0.26,  | 0.002  |
|                   | 10.35)  | 10.19)  | 0.04)   |        |   |        |   |   | 33.57)   | 39.16)   | 0.93)   |        | 0.88)  | 0.91)  | 1.13)   |        |
|                   | 8.99    | 9.10    | 0.04    |        |   |        |   |   | 23.43    | 25.88    | 0.27    |        | 0.38   | 0.42   | 0.31    |        |
| Ecuador           | (8.08,  | (8.41,  | (0.02,  | <0.001 | — | —      | — | — | (21.94,  | (24.72,  | (-0.06, | 0.113  | (0.21, | (0.29, | (-0.13, | 0.170  |
|                   | 9.99)   | 9.83)   | 0.06)   |        |   |        |   |   | 25.00)   | 27.09)   | 0.60)   |        | 0.64)  | 0.60)  | 0.75)   |        |
|                   | 8.77    | 8.77    | 0.00    |        |   |        |   |   | 62.75    | 48.03    | -0.92   |        | 0.99   | 0.75   | -0.94   |        |
| Egypt             | (8.37,  | (8.48,  | (-0.00, | 0.703  | — | —      | — | — | (61.71,  | (47.36,  | (-1.15, | <0.001 | (0.86, | (0.67, | (-1.20, | <0.001 |
|                   | 9.17)   | 9.06)   | 0.00)   |        |   |        |   |   | 63.81)   | 48.70)   | -0.68)  |        | 1.13)  | 0.84)  | -0.69)  |        |
|                   | 9.15    | 9.13    | -0.01   |        |   |        |   |   | 15.51    | 11.16    | -1.08   |        | 0.26   | 0.18   | -1.25   |        |
| El Salvador       | (7.85,  | (7.99,  | (-0.01, | <0.001 | — | —      | — | — | (13.79,  | (9.88,   | (-1.84, | 0.005  | (0.08, | (0.05, | (-2.12, | 0.005  |
|                   | 10.62)  | 10.40)  | -0.00)  |        |   |        |   |   | 17.40)   | 12.56)   | -0.32)  |        | 0.63)  | 0.46)  | -0.37)  |        |
|                   | 9.91    | 10.23   | 0.11    |        |   |        |   |   | 86.88    | 61.64    | -1.22   |        | 1.46   | 1.04   | -1.24   |        |
| Equatorial Guinea | (5.42,  | (7.83,  | (0.10,  | <0.001 | — | —      | — | — | (72.11,  | (55.36,  | (-1.46, | <0.001 | (0.18, | (0.37, | (-1.47, | <0.001 |
|                   | 16.85)  | 13.22)  | 0.12)   |        |   |        |   |   | 103.95)  | 68.50)   | -0.98)  |        | 5.57)  | 2.39)  | -1.00)  |        |
|                   | 10.06   | 10.10   | 0.01    |        |   |        |   |   | 45.12    | 50.12    | 0.36    |        | 0.77   | 0.86   | 0.40    |        |
| Eritrea           | (8.26,  | (8.95,  | (0.01,  | <0.001 | — | —      | — | — | (41.06,  | (47.43,  | (0.02,  | 0.038  | (0.33, | (0.54, | (0.21,  | <0.001 |
|                   | 12.18)  | 11.38)  | 0.02)   |        |   |        |   |   | 49.49)   | 52.94)   | 0.70)   |        | 1.58)  | 1.32)  | 0.59)   |        |
|                   | 12.50   | 12.58   | 0.02    |        |   | 2.20   |   |   | 182.42   | 103.47   | -1.81   |        | 3.27   | 1.84   | -2.09   |        |
| Estonia           | (9.76,  | (9.28,  | (0.01,  | <0.001 | — | (1.11, | — | — | (171.90, | (94.50,  | (-2.68, | <0.001 | (2.01, | (0.83, | (-2.94, | <0.001 |
|                   | 15.80)  | 16.79)  | 0.03)   |        |   | 4.22)  |   |   | 193.47)  | 113.23)  | -0.93)  |        | 5.10)  | 3.80)  | -1.24)  |        |
|                   | 9.90    | 10.01   | 0.04    |        |   |        |   |   | 60.32    | 66.58    | 0.33    |        | 1.00   | 1.09   | 0.29    |        |
| Eswatini          | (6.51,  | (7.42,  | (0.03,  | <0.001 | — | —      | — | — | (51.37,  | (59.57,  | (0.18,  | <0.001 | (0.18, | (0.37, | (0.11,  | 0.002  |
|                   | 14.60)  | 13.28)  | 0.04)   |        |   |        |   |   | 70.53)   | 74.22)   | 0.49)   |        | 3.41)  | 2.56)  | 0.47)   |        |
|                   | 11.02   | 11.08   | 0.02    |        |   |        |   |   | 40.02    | 32.51    | -0.70   |        | 0.68   | 0.55   | -0.77   |        |
| Ethiopia          | (10.53, | (10.77, | (0.02,  | <0.001 | — | —      | — | — | (39.05,  | (31.95,  | (-0.80, | <0.001 | (0.56, | (0.48, | (-0.95, | <0.001 |

|           |         |         |           |        |         |         |         |        |          |         |         |        |        |        |         |        |
|-----------|---------|---------|-----------|--------|---------|---------|---------|--------|----------|---------|---------|--------|--------|--------|---------|--------|
|           | 11.53)  | 11.41)  | 0.02)     |        |         |         |         |        | 41.00)   | 33.09)  | -0.60)  |        | 0.82)  | 0.63)  | -0.58)  |        |
|           | 10.91   | 10.94   | 0.01      |        |         |         |         |        | 70.35    | 75.05   | 0.21    |        | 1.18   | 1.26   | 0.21    |        |
| Fiji      | (7.59,  | (7.79,  | (0.01,    | <0.001 | —       | —       | —       | —      | (61.31,  | (66.37, | (-0.03, | 0.085  | (0.30, | (0.38, | (-0.05, | 0.108  |
|           | 15.27)  | 14.95)  | 0.01)     |        |         |         |         |        | 80.39)   | 84.55)  | 0.45)   |        | 3.26)  | 3.08)  | 0.46)   |        |
|           | 12.83   | 12.86   | 0.01      |        |         |         |         |        | 102.91   | 63.83   | -1.67   |        | 1.74   | 1.07   | -1.70   |        |
| Finland   | (11.23, | (11.20, | (-0.00,   | 0.127  | —       | —       | —       | —      | (98.42,  | (60.15, | (-2.13, | <0.001 | (1.21, | (0.65, | (-2.17, | <0.001 |
|           | 14.61)  | 14.72)  | 0.02)     |        |         |         |         |        | 107.56)  | 67.69)  | -1.21)  |        | 2.46)  | 1.70)  | -1.22)  |        |
|           | 12.48   | 12.44   | -0.01     |        | 5.33    |         |         |        | 40.29    | 22.79   | -1.93   |        | 0.62   | 0.35   | -1.98   |        |
| France    | (12.02, | (11.96, | (-0.01,   | <0.001 | (5.03,  | —       | —       | —      | (39.47,  | (22.14, | (-2.16, | <0.001 | (0.53, | (0.27, | (-2.27, | <0.001 |
|           | 12.95)  | 12.95)  | -0.01)    |        | 5.64)   |         |         |        | 41.14)   | 23.46)  | -1.70)  |        | 0.74)  | 0.44)  | -1.69)  |        |
|           | 10.12   | 9.99    | -0.05     |        |         |         |         |        | 89.12    | 72.77   | -0.73   |        | 1.51   | 1.23   | -0.74   |        |
| Gabon     | (7.11,  | (7.83,  | (-0.05,   | <0.001 | —       | —       | —       | —      | (79.50,  | (66.65, | (-1.29, | 0.011  | (0.50, | (0.55, | (-1.29, | 0.008  |
|           | 14.05)  | 12.59)  | -0.04)    |        |         |         |         |        | 99.66)   | 79.33)  | -0.17)  |        | 3.57)  | 2.39)  | -0.20)  |        |
|           | 10.00   | 10.00   | -0.000001 |        |         |         |         |        | 63.92    | 62.69   | 0.00    |        | 1.06   | 1.03   | -0.04   |        |
| Gambia    | (6.97,  | (8.03,  | (-0.00577 | 1.000  | —       | —       | —       | —      | (55.86,  | (57.62, | (-0.76, | 0.998  | (0.27, | (0.47, | (-0.79, | 0.924  |
|           | 14.05)  | 12.35)  | 8,        |        |         |         |         |        | 72.95)   | 68.13)  | 0.77)   |        | 3.03)  | 2.00)  | 0.72)   |        |
|           |         |         | 0.005777) |        |         |         |         |        |          |         |         |        |        |        |         |        |
|           | 11.48   | 11.59   | 0.03      |        |         |         |         |        | 64.61    | 65.62   | 0.14    |        | 1.11   | 1.13   | 0.15    |        |
| Georgia   | (10.09, | (9.72,  | (0.02,    | <0.001 | —       | —       | —       | —      | (61.27,  | (61.24, | (-0.62, | 0.723  | (0.71, | (0.63, | (-0.62, | 0.706  |
|           | 13.02)  | 13.74)  | 0.04)     |        |         |         |         |        | 68.09)   | 70.27)  | 0.90)   |        | 1.66)  | 1.94)  | 0.92)   |        |
|           | 12.40   | 12.50   | 0.03      |        |         |         |         |        | 65.03    | 35.69   | -2.09   |        | 1.07   | 0.58   | -2.13   |        |
| Germany   | (12.00, | (12.07, | (0.02,    | <0.001 | —       | —       | —       | —      | (64.12,  | (34.97, | (-2.32, | <0.001 | (0.95, | (0.49, | (-2.37, | <0.001 |
|           | 12.81)  | 12.94)  | 0.04)     |        |         |         |         |        | 65.95)   | 36.43)  | -1.86)  |        | 1.19)  | 0.68)  | -1.90)  |        |
|           | 10.01   | 10.00   | -0.00     |        |         |         |         |        | 88.48    | 97.48   | 0.35    |        | 1.48   | 1.63   | 0.35    |        |
| Ghana     | (9.18,  | (9.47,  | (-0.01,   | 0.487  | —       | —       | —       | —      | (85.98,  | (95.80, | (0.14,  | 0.001  | (1.17, | (1.42, | (0.13,  | 0.002  |
|           | 10.89)  | 10.55)  | 0.01)     |        |         |         |         |        | 91.03)   | 99.18)  | 0.56)   |        | 1.85)  | 1.87)  | 0.58)   |        |
|           | 12.47   | 12.48   | 0.00      |        |         |         |         |        | 32.01    | 26.26   | -0.66   |        | 0.51   | 0.43   | -0.56   |        |
| Greece    | (11.37, | (11.22, | (-0.01,   | 0.667  | —       | —       | —       | —      | (30.23,  | (24.46, | (-0.87, | <0.001 | (0.31, | (0.23, | (-0.79, | <0.001 |
|           | 13.65)  | 13.86)  | 0.01)     |        |         |         |         |        | 33.87)   | 28.17)  | -0.44)  |        | 0.79)  | 0.75)  | -0.34)  |        |
|           | 14.19   | 13.85   | -0.08     |        | 116.75  | 80.21   | -1.28   |        | 145.73   | 97.73   | -1.35   |        | 2.36   | 1.55   | -1.43   |        |
| Greenland | (3.53,  | (2.66,  | (-0.12,   | <0.001 | (80.01, | (46.89, | (-1.48, | <0.001 | (103.30, | (60.17, | (-1.67, | <0.001 | (0.01, | (0.00, | (-1.78, | <0.001 |
|           | 42.80)  | 44.55)  | -0.05)    |        | 168.08) | 130.39) | -1.09)  |        | 202.88)  | 152.11) | -1.03)  |        | 25.63) | 25.19) | -1.07)  |        |
| Grenada   | 9.25    | 9.29    | 0.02      | <0.001 | —       | —       | —       | —      | 131.78   | 109.26  | -0.72   | <0.001 | 2.26   | 1.87   | -0.74   | <0.001 |

|               |         |         |         |        |   |   |   |   |          |          |         |        |        |        |         |        |
|---------------|---------|---------|---------|--------|---|---|---|---|----------|----------|---------|--------|--------|--------|---------|--------|
|               | (1.87,  | (2.37,  | (0.01,  |        |   |   |   |   | (94.16,  | (78.83,  | (-1.11, |        | (0.01, | (0.01, | (-1.13, |        |
|               | 28.79)  | 25.49)  | 0.02)   |        |   |   |   |   | 180.11)  | 148.00)  | -0.34)  |        | 18.12) | 14.16) | -0.35)  |        |
|               | 11.15   | 11.03   | -0.04   |        |   |   |   |   | 65.24    | 67.57    | 0.00    |        | 1.08   | 1.15   | 0.14    |        |
| Guam          | (4.49,  | (4.30,  | (-0.05, | <0.001 | — | — | — | — | (46.77,  | (48.20,  | (-0.18, | 0.964  | (0.01, | (0.01, | (-0.24, | 0.470  |
|               | 23.27)  | 23.43)  | -0.03)  |        |   |   |   |   | 88.79)   | 92.28)   | 0.19)   |        | 8.50)  | 8.83)  | 0.53)   |        |
|               | 9.18    | 9.18    | 0.00    |        |   |   |   |   | 17.86    | 17.45    | -0.06   |        | 0.29   | 0.29   | 0.01    |        |
| Guatemala     | (8.08,  | (8.52,  | (-0.00, | 0.525  | — | — | — | — | (16.31,  | (16.52,  | (-0.70, | 0.842  | (0.13, | (0.18, | (-0.73, | 0.982  |
|               | 10.39)  | 9.89)   | 0.01)   |        |   |   |   |   | 19.52)   | 18.42)   | 0.57)   |        | 0.59)  | 0.44)  | 0.75)   |        |
|               | 9.93    | 9.92    | -0.00   |        |   |   |   |   | 77.99    | 68.04    | -0.47   |        | 1.30   | 1.12   | -0.51   |        |
| Guinea        | (8.62,  | (9.03,  | (-0.01, | 0.102  | — | — | — | — | (74.22,  | (65.67,  | (-0.72, | <0.001 | (0.85, | (0.83, | (-0.79, | 0.001  |
|               | 11.40)  | 10.89)  | 0.00)   |        |   |   |   |   | 81.91)   | 70.47)   | -0.23)  |        | 1.91)  | 1.48)  | -0.22)  |        |
|               | 9.94    | 9.98    | 0.01    |        |   |   |   |   | 90.07    | 71.95    | -0.76   |        | 1.49   | 1.18   | -0.81   |        |
| Guinea-Bissau | (6.92,  | (7.87,  | (0.01,  | <0.001 | — | — | — | — | (80.40,  | (66.10,  | (-0.88, | <0.001 | (0.49, | (0.54, | (-0.92, | <0.001 |
|               | 13.95)  | 12.53)  | 0.02)   |        |   |   |   |   | 100.67)  | 78.22)   | -0.65)  |        | 3.60)  | 2.30)  | -0.70)  |        |
|               | 9.21    | 9.21    | 0.00    |        |   |   |   |   | 158.90   | 184.60   | 0.59    |        | 2.70   | 3.18   | 0.80    |        |
| Guyana        | (6.20,  | (6.16,  | (-0.01, | 0.926  | — | — | — | — | (145.22, | (169.55, | (-0.20, | 0.141  | (1.18, | (1.48, | (-0.05, | 0.065  |
|               | 13.27)  | 13.33)  | 0.01)   |        |   |   |   |   | 173.59)  | 200.68)  | 1.39)   |        | 5.36)  | 6.00)  | 1.67)   |        |
|               | 9.14    | 9.15    | 0.01    |        |   |   |   |   | 113.58   | 111.46   | 0.01    |        | 1.93   | 1.89   | 0.01    |        |
| Haiti         | (7.96,  | (8.35,  | (-0.00, | 0.078  | — | — | — | — | (109.26, | (108.61, | (-0.42, | 0.955  | (1.40, | (1.54, | (-0.44, | 0.979  |
|               | 10.46)  | 10.01)  | 0.01)   |        |   |   |   |   | 118.04)  | 114.36)  | 0.45)   |        | 2.60)  | 2.31)  | 0.45)   |        |
|               | 9.18    | 9.15    | -0.01   |        |   |   |   |   | 43.31    | 24.23    | -2.06   |        | 0.74   | 0.42   | -2.05   |        |
| Honduras      | (7.76,  | (8.24,  | (-0.02, | <0.001 | — | — | — | — | (40.05,  | (22.69,  | (-2.39, | <0.001 | (0.37, | (0.24, | (-2.38, | <0.001 |
|               | 10.80)  | 10.14)  | -0.01)  |        |   |   |   |   | 46.78)   | 25.85)   | -1.72)  |        | 1.35)  | 0.68)  | -1.72)  |        |
|               | 13.35   | 13.40   | 0.01    |        |   |   |   |   | 180.38   | 92.14    | -2.26   |        | 3.16   | 1.60   | -2.30   |        |
| Hungary       | (12.19, | (12.08, | (0.01,  | <0.001 | — | — | — | — | (176.21, | (88.79,  | (-2.90, | <0.001 | (2.63, | (1.19, | (-3.06, | <0.001 |
|               | 14.60)  | 14.83)  | 0.02)   |        |   |   |   |   | 184.63)  | 95.60)   | -1.62)  |        | 3.77)  | 2.13)  | -1.53)  |        |
|               | 12.55   | 12.62   | 0.02    |        |   |   |   |   | 19.89    | 10.86    | -1.95   |        | 0.31   | 0.16   | -2.18   |        |
| Iceland       | (6.70,  | (7.09,  | (0.01,  | 0.003  | — | — | — | — | (12.25,  | (5.80,   | (-2.30, | <0.001 | (0.00, | (0.00, | (-2.66, | <0.001 |
|               | 21.57)  | 21.07)  | 0.04)   |        |   |   |   |   | 30.64)   | 18.84)   | -1.61)  |        | 4.42)  | 4.05)  | -1.69)  |        |
|               | 11.17   | 11.17   | -0.00   |        |   |   |   |   | 8.95     | 8.40     | -0.22   |        | 0.15   | 0.14   | -0.24   |        |
| India         | (11.06, | (11.08, | (-0.00, | 0.768  | — | — | — | — | (8.85,   | (8.33,   | (-0.57, | 0.215  | (0.14, | (0.13, | (-0.71, | 0.336  |
|               | 11.29)  | 11.25)  | 0.00)   |        |   |   |   |   | 9.05)    | 8.48)    | 0.13)   |        | 0.16)  | 0.15)  | 0.25)   |        |
| Indonesia     | 11.21   | 11.29   | 0.03    | <0.001 | — | — | — | — | 36.21    | 32.64    | -0.35   | <0.001 | 0.61   | 0.55   | -0.37   | <0.001 |

|                            |         |         |         |        |         |         |         |        |         |          |         |        |        |        |         |        |
|----------------------------|---------|---------|---------|--------|---------|---------|---------|--------|---------|----------|---------|--------|--------|--------|---------|--------|
|                            | (10.97, | (11.09, | (0.02,  |        |         |         |         |        | (35.78, | (32.30,  | (-0.43, |        | (0.55, | (0.50, | (-0.48, |        |
|                            | 11.45)  | 11.49)  | 0.03)   |        |         |         |         |        | 36.65)  | 32.98)   | -0.27)  |        | 0.67)  | 0.59)  | -0.27)  |        |
|                            | 9.58    | 9.59    | 0.00    |        |         |         |         |        | 21.66   | 19.72    | -0.31   |        | 0.34   | 0.31   | -0.31   |        |
| Iran (Islamic Republic of) | (9.16,  | (9.26,  | (-0.01, | 0.755  | —       | —       | —       | —      | (21.04, | (19.24,  | (-0.50, | 0.001  | (0.27, | (0.25, | (-0.50, | 0.002  |
|                            | 10.01)  | 9.92)   | 0.02)   |        |         |         |         |        | 22.29)  | 20.20)   | -0.12)  |        | 0.43)  | 0.37)  | -0.12)  |        |
|                            | 8.76    | 8.77    | 0.00    |        |         |         |         |        | 71.70   | 50.34    | -1.23   |        | 1.16   | 0.81   | -1.25   |        |
| Iraq                       | (8.04,  | (8.35,  | (-0.01, | 0.553  | —       | —       | —       | —      | (69.60, | (49.30,  | (-1.46, | <0.001 | (0.91, | (0.68, | (-1.50, | <0.001 |
|                            | 9.54)   | 9.22)   | 0.02)   |        |         |         |         |        | 73.86)  | 51.39)   | -0.99)  |        | 1.48)  | 0.96)  | -1.01)  |        |
|                            | 12.47   | 12.41   | -0.02   |        |         |         |         |        | 69.57   | 27.52    | -3.19   |        | 1.13   | 0.44   | -3.18   |        |
| Ireland                    | (10.66, | (10.73, | (-0.03, | <0.001 | —       | —       | —       | —      | (65.18, | (25.03,  | (-3.58, | <0.001 | (0.63, | (0.18, | (-3.66, | <0.001 |
|                            | 14.50)  | 14.28)  | -0.01)  |        |         |         |         |        | 74.17)  | 30.20)   | -2.80)  |        | 1.86)  | 0.91)  | -2.70)  |        |
|                            | 12.43   | 12.51   | 0.02    |        |         |         |         |        | 36.87   | 15.20    | -3.06   |        | 0.59   | 0.23   | -3.19   |        |
| Israel                     | (10.89, | (11.32, | (0.02,  | <0.001 | —       | —       | —       | —      | (34.19, | (13.89,  | (-3.40, | <0.001 | (0.29, | (0.10, | (-3.54, | <0.001 |
|                            | 14.13)  | 13.79)  | 0.03)   |        |         |         |         |        | 39.72)  | 16.61)   | -2.72)  |        | 1.05)  | 0.47)  | -2.85)  |        |
|                            | 13.65   | 14.64   | 0.24    |        | 0.17    |         |         |        | 50.86   | 16.93    | -3.74   |        | 0.81   | 0.25   | -4.00   |        |
| Italy                      | (13.16, | (14.05, | (0.23,  | <0.001 | (0.12,  | —       | —       | —      | (49.91, | (16.30,  | (-4.01, | <0.001 | (0.69, | (0.18, | (-4.47, | <0.001 |
|                            | 14.15)  | 15.24)  | 0.26)   |        | 0.24)   |         |         |        | 51.83)  | 17.57)   | -3.46)  |        | 0.94)  | 0.34)  | -3.53)  |        |
|                            | 9.19    | 9.21    | 0.01    |        |         |         |         |        | 54.15   | 59.97    | 0.64    |        | 0.91   | 1.03   | 0.56    |        |
| Jamaica                    | (7.33,  | (7.57,  | (0.00,  | 0.064  | —       | —       | —       | —      | (49.40, | (55.61,  | (-0.22, | 0.148  | (0.39, | (0.53, | (-0.94, | 0.467  |
|                            | 11.40)  | 11.12)  | 0.02)   |        |         |         |         |        | 59.27)  | 64.59)   | 1.51)   |        | 1.85)  | 1.80)  | 2.08)   |        |
|                            | 16.25   | 15.75   | -0.11   |        | 17.83   | 15.46   | -0.49   |        | 65.02   | 34.49    | -2.16   |        | 1.00   | 0.50   | -2.34   |        |
| Japan                      | (15.87, | (15.32, | (-0.13, | <0.001 | (17.44, | (15.04, | (-0.57, | <0.001 | (64.27, | (33.87,  | (-2.33, | <0.001 | (0.91, | (0.43, | (-2.53, | <0.001 |
|                            | 16.62)  | 16.19)  | -0.10)  |        | 18.22)  | 15.89)  | -0.41)  |        | 65.77)  | 35.13)   | -1.99)  |        | 1.10)  | 0.59)  | -2.15)  |        |
|                            | 8.84    | 8.88    | 0.01    |        |         |         |         |        | 18.91   | 9.51     | -2.33   |        | 0.30   | 0.14   | -2.63   |        |
| Jordan                     | (7.33,  | (8.07,  | (-0.01, | 0.161  | —       | —       | —       | —      | (16.67, | (8.67,   | (-2.78, | <0.001 | (0.08, | (0.06, | (-3.23, | <0.001 |
|                            | 10.62)  | 9.75)   | 0.03)   |        |         |         |         |        | 21.42)  | 10.41)   | -1.88)  |        | 0.84)  | 0.30)  | -2.02)  |        |
|                            | 11.54   | 11.52   | -0.01   |        | 1.99    | 2.11    | 0.09    |        | 85.26   | 525.72   | 6.83    |        | 1.47   | 9.37   | 6.97    |        |
| Kazakhstan                 | (10.75, | (10.74, | (-0.01, | 0.001  | (1.66,  | (1.80,  | (-0.29, | 0.644  | (83.08, | (520.55, | (5.99,  | <0.001 | (1.19, | (8.69, | (6.13,  | <0.001 |
|                            | 12.38)  | 12.36)  | -0.00)  |        | 2.37)   | 2.48)   | 0.47)   |        | 87.49)  | 530.94)  | 7.69)   |        | 1.79)  | 10.09) | 7.81)   |        |
|                            | 11.08   | 11.09   | 0.00    |        |         |         |         |        | 37.01   | 38.28    | 0.12    |        | 0.64   | 0.65   | 0.01    |        |
| Kenya                      | (10.35, | (10.64, | (0.00,  | <0.001 | —       | —       | —       | —      | (35.60, | (37.42,  | (0.04,  | 0.005  | (0.46, | (0.55, | (-0.10, | 0.831  |
|                            | 11.85)  | 11.55)  | 0.00)*  |        |         |         |         |        | 38.46)  | 39.16)   | 0.20)   |        | 0.86)  | 0.78)  | 0.13)   |        |
| Kiribati                   | 10.82   | 10.82   | 0.00    | 0.738  | —       | —       | —       | —      | 79.44   | 98.02    | 0.70    | <0.001 | 1.36   | 1.69   | 0.71    | <0.001 |

|              |         |         |         |        |   |        |   |   |          |          |         |        |        |        |         |        |
|--------------|---------|---------|---------|--------|---|--------|---|---|----------|----------|---------|--------|--------|--------|---------|--------|
|              | (2.40,  | (3.63,  | (-0.00, |        |   |        |   |   | (50.07,  | (71.85,  | (0.57,  |        | (0.00, | (0.02, | (0.50,  |        |
|              | 32.40)  | 25.21)  | 0.01)   |        |   |        |   |   | 120.69)  | 130.84)  | 0.82)   |        | 17.85) | 11.54) | 0.93)   |        |
|              | 8.95    | 8.78    | -0.07   |        |   |        |   |   | 36.13    | 20.55    | -1.81   |        | 0.57   | 0.32   | -1.91   |        |
| Kuwait       | (7.06,  | (7.47,  | (-0.08, | <0.001 | — | —      | — | — | (32.17,  | (18.49,  | (-3.26, | 0.016  | (0.18, | (0.11, | (-3.00, | 0.001  |
|              | 11.25)  | 10.29)  | -0.05)  |        |   |        |   |   | 40.49)   | 22.83)   | -0.33)  |        | 1.45)  | 0.78)  | -0.81)  |        |
|              | 11.53   | 11.55   | 0.01    |        |   |        |   |   | 113.22   | 174.85   | 1.56    |        | 2.00   | 3.14   | 1.65    |        |
| Kyrgyzstan   | (10.00, | (10.29, | (0.00,  | 0.011  | — | —      | — | — | (108.16, | (169.77, | (0.88,  | <0.001 | (1.37, | (2.49, | (0.99,  | <0.001 |
|              | 13.24)  | 12.93)  | 0.01)   |        |   |        |   |   | 118.47)  | 180.04)  | 2.25)   |        | 2.82)  | 3.91)  | 2.32)   |        |
| Lao People's | 10.12   | 10.26   | 0.05    |        |   |        |   |   | 26.05    | 36.59    | 1.22    |        | 0.44   | 0.62   | 1.23    |        |
| Democratic   | (8.57,  | (9.17,  | (0.04,  | <0.001 | — | —      | — | — | (23.44,  | (34.48,  | (1.03,  | <0.001 | (0.16, | (0.37, | (0.95,  | <0.001 |
| Republic     | 11.90)  | 11.45)  | 0.05)   |        |   |        |   |   | 28.89)   | 38.81)   | 1.41)   |        | 0.98)  | 0.97)  | 1.51)   |        |
|              | 12.10   | 12.17   | 0.02    |        |   | 4.12   |   |   | 419.47   | 577.21   | 1.13    |        | 7.42   | 10.32  | 1.18    |        |
| Latvia       | (10.00, | (9.40,  | (-0.01, | 0.147  | — | (2.76, | — | — | (406.86, | (558.93, | (0.07,  | 0.036  | (5.83, | (8.02, | (0.11,  | 0.030  |
|              | 14.54)  | 15.59)  | 0.04)   |        |   | 6.07)  |   |   | 432.38)  | 596.03)  | 2.20)   |        | 9.33)  | 13.21) | 2.26)   |        |
|              | 8.72    | 8.77    | 0.02    |        |   |        |   |   | 48.24    | 36.71    | -0.92   |        | 0.76   | 0.57   | -0.99   |        |
| Lebanon      | (7.10,  | (7.52,  | (0.01,  | <0.001 | — | —      | — | — | (44.36,  | (34.07,  | (-1.02, | <0.001 | (0.35, | (0.29, | (-1.10, | <0.001 |
|              | 10.61)  | 10.18)  | 0.03)   |        |   |        |   |   | 52.40)   | 39.51)   | -0.82)  |        | 1.49)  | 1.03)  | -0.88)  |        |
|              | 10.02   | 10.11   | 0.03    |        |   |        |   |   | 56.65    | 67.04    | 0.56    |        | 0.94   | 1.10   | 0.51    |        |
| Lesotho      | (7.72,  | (8.17,  | (0.03,  | <0.001 | — | —      | — | — | (50.94,  | (61.91,  | (0.47,  | <0.001 | (0.34, | (0.53, | (0.40,  | <0.001 |
|              | 12.85)  | 12.37)  | 0.04)   |        |   |        |   |   | 62.87)   | 72.50)   | 0.65)   |        | 2.15)  | 2.03)  | 0.61)   |        |
|              | 9.93    | 10.03   | 0.03    |        |   |        |   |   | 71.51    | 56.87    | -0.88   |        | 1.18   | 0.94   | -0.87   |        |
| Liberia      | (7.64,  | (8.66,  | (0.02,  | <0.001 | — | —      | — | — | (65.10,  | (53.53,  | (-1.20, | <0.001 | (0.49, | (0.55, | (-1.20, | <0.001 |
|              | 12.71)  | 11.57)  | 0.05)   |        |   |        |   |   | 78.39)   | 60.38)   | -0.57)  |        | 2.41)  | 1.50)  | -0.54)  |        |
|              | 8.86    | 8.78    | -0.03   |        |   |        |   |   | 37.73    | 28.93    | -0.93   |        | 0.59   | 0.45   | -0.94   |        |
| Libya        | (7.43,  | (7.75,  | (-0.04, | <0.001 | — | —      | — | — | (34.78,  | (27.03,  | (-1.24, | <0.001 | (0.27, | (0.24, | (-1.26, | <0.001 |
|              | 10.52)  | 9.90)   | -0.03)  |        |   |        |   |   | 40.88)   | 30.93)   | -0.62)  |        | 1.15)  | 0.77)  | -0.61)  |        |
|              | 12.92   | 12.98   | -0.00   |        |   |        |   |   | 155.03   | 174.91   | 0.36    |        | 2.73   | 3.13   | 0.43    |        |
| Lithuania    | (11.10, | (10.64, | (-0.14, | 0.950  | — | —      | — | — | (148.60, | (166.41, | (-0.75, | 0.525  | (1.94, | (2.09, | (-0.55, | 0.390  |
|              | 14.96)  | 15.72)  | 0.14)   |        |   |        |   |   | 161.68)  | 183.79)  | 1.49)   |        | 3.75)  | 4.58)  | 1.41)   |        |
|              | 13.28   | 13.28   | 0.00    |        |   |        |   |   | 49.20    | 21.03    | -2.89   |        | 0.78   | 0.32   | -3.03   |        |
| Luxembourg   | (8.03,  | (8.81,  | (-0.04, | 0.894  | — | —      | — | — | (38.46,  | (15.37,  | (-3.40, | <0.001 | (0.03, | (0.00, | (-3.56, | <0.001 |
|              | 21.15)  | 19.48)  | 0.05)   |        |   |        |   |   | 62.40)   | 28.35)   | -2.38)  |        | 4.86)  | 2.92)  | -2.49)  |        |
| Madagascar   | 10.05   | 10.06   | 0.00    | 0.050  | — | —      | — | — | 134.04   | 105.29   | -0.82   | 0.001  | 2.31   | 1.81   | -0.83   | <0.001 |

|                                        |                        |                        |                      |        |      |   |   |   |                          |                          |                      |        |               |               |                |        |
|----------------------------------------|------------------------|------------------------|----------------------|--------|------|---|---|---|--------------------------|--------------------------|----------------------|--------|---------------|---------------|----------------|--------|
|                                        | (9.12, 11.06)          | (9.46, 10.69)          | (0.00, 0.01)         |        |      |   |   |   | (130.45, 137.71)         | (103.27, 107.35)         | (-1.29, -0.33)       |        | (1.86, 2.85)  | (1.55, 2.10)  | (-1.26, -0.39) |        |
|                                        | 10.02                  | 10.00                  | -0.01                |        |      |   |   |   | 39.70                    | 44.08                    | 0.34                 |        | 0.68          | 0.75          | 0.33           |        |
| Malawi                                 | (8.98, 11.16)          | (9.27, 10.77)          | (-0.02, 0.01)        | 0.330  | —    | — | — | — | (37.51, 41.98)           | (42.49, 45.71)           | (0.17, 0.52)         | <0.001 | (0.42, 1.05)  | (0.56, 1.00)  | (0.10, 0.55)   | 0.004  |
|                                        | 10.24                  | 10.38                  | 0.05                 |        |      |   |   |   | 50.89                    | 48.12                    | -0.14                |        | 0.83          | 0.79          | -0.21          |        |
| Malaysia                               | (9.52, 11.00)          | (9.85, 10.93)          | (0.04, 0.05)         | <0.001 | —    | — | — | — | (49.25, 52.57)           | (46.98, 49.30)           | (-0.53, 0.26)        | 0.498  | (0.64, 1.08)  | (0.65, 0.95)  | (-0.76, 0.35)  | 0.470  |
|                                        | 10.23                  | 10.95                  | 0.24                 |        |      |   |   |   | 22.06                    | 16.37                    | -0.85                |        | 0.36          | 0.26          | -0.98          |        |
| Maldives                               | (4.30, 21.85)          | (7.08, 16.62)          | (0.22, 0.27)         | <0.001 | —    | — | — | — | (12.35, 37.32)           | (11.71, 22.74)           | (-1.42, -0.28)       | 0.004  | (0.00, 8.14)  | (0.00, 3.05)  | (-1.53, -0.44) | <0.001 |
|                                        | 9.96                   | 9.99                   | 0.01                 |        |      |   |   |   | 92.21                    | 69.43                    | -0.97                |        | 1.55          | 1.15          | -1.01          |        |
| Mali                                   | (8.83, 11.20)          | (9.28, 10.74)          | (0.01, 0.02)         | <0.001 | —    | — | — | — | (88.66, 95.87)           | (67.53, 71.37)           | (-1.20, -0.74)       | <0.001 | (1.11, 2.10)  | (0.91, 1.43)  | (-1.20, -0.81) | <0.001 |
|                                        | 12.54                  | 12.60                  | 0.02                 |        |      |   |   |   | 54.47                    | 35.83                    | -1.50                |        | 0.86          | 0.57          | -1.46          |        |
| Malta                                  | (7.34, 20.22)          | (7.34, 20.71)          | (0.01, 0.02)         | <0.001 | —    | — | — | — | (42.83, 68.45)           | (26.50, 47.83)           | (-1.77, -1.22)       | <0.001 | (0.04, 4.64)  | (0.01, 4.82)  | (-1.73, -1.19) | <0.001 |
|                                        | 10.92                  | 10.96                  | 0.01                 |        |      |   |   |   | 77.64                    | 96.47                    | 0.72                 |        | 1.32          | 1.65          | 0.76           |        |
| Marshall Islands                       | (1.12, 45.31)          | (1.92, 34.75)          | (0.01, 0.02)         | <0.001 | —    | — | — | — | (40.29, 136.87)          | (61.00, 145.23)          | (0.67, 0.78)         | <0.001 | (0.00, 29.76) | (0.00, 19.36) | (0.69, 0.82)   | <0.001 |
|                                        | 10.02                  | 10.00                  | -0.01                |        |      |   |   |   | 74.36                    | 46.71                    | -1.51                |        | 1.23          | 0.77          | -1.52          |        |
| Mauritania                             | (7.85, 12.64)          | (8.47, 11.75)          | (-0.01, -0.00)       | <0.001 | —    | — | — | — | (68.22, 80.94)           | (43.31, 50.31)           | (-1.63, -1.38)       | <0.001 | (0.55, 2.40)  | (0.39, 1.39)  | (-1.66, -1.39) | <0.001 |
|                                        | 10.29                  | 10.27                  | -0.01                |        |      |   |   |   | 41.37                    | 84.22                    | 2.58                 |        | 0.70          | 1.45          | 2.68           |        |
| Mauritius                              | (7.67, 13.54)          | (7.57, 13.64)          | (-0.01, -0.00)       | <0.001 | —    | — | — | — | (35.89, 47.47)           | (76.24, 92.83)           | (2.07, 3.09)         | <0.001 | (0.17, 1.94)  | (0.59, 3.04)  | (2.15, 3.21)   | <0.001 |
|                                        | 10.22                  | 10.24                  | 0.01                 |        |      |   |   |   | 16.62                    | 19.81                    | 0.65                 |        | 0.27          | 0.32          | 0.64           |        |
| Mexico                                 | (9.88, 10.57)          | (9.96, 10.53)          | (0.00, 0.01)         | <0.001 | —    | — | — | — | (16.18, 17.06)           | (19.42, 20.21)           | (0.37, 0.92)         | <0.001 | (0.22, 0.33)  | (0.27, 0.38)  | (0.17, 1.11)   | 0.007  |
| Micronesia<br>(Federated States<br>of) | 10.92<br>(3.10, 28.53) | 10.96<br>(3.29, 27.60) | 0.01<br>(0.01, 0.02) | <0.001 | —    | — | — | — | 78.40<br>(52.23, 113.60) | 92.27<br>(64.78, 127.96) | 0.55<br>(0.49, 0.61) | <0.001 | (0.00, 14.07) | (0.01, 13.46) | (0.46, 0.60)   | <0.001 |
| Monaco                                 | 12.45                  | 12.44                  | -0.01                | 0.033  | 8.80 | — | — | — | 83.23                    | 58.18                    | -1.23                | <0.001 | 1.35          | 0.95          | -1.22          | <0.001 |

|             |                   |                   |                   |        |                  |                 |                   |        |                     |                     |                   |        |                   |                  |                   |        |
|-------------|-------------------|-------------------|-------------------|--------|------------------|-----------------|-------------------|--------|---------------------|---------------------|-------------------|--------|-------------------|------------------|-------------------|--------|
|             | (0.44,<br>80.54)  | (0.48,<br>66.36)  | (-0.02,<br>-0.00) |        | (0.14,<br>74.23) |                 |                   |        | (35.12,<br>177.69)  | (20.23,<br>133.53)  | (-1.27,<br>-1.18) |        | (0.00,<br>63.46)  | (0.00,<br>46.09) | (-1.35,<br>-1.08) |        |
|             | 11.53             | 11.54             | 0.00              |        |                  |                 |                   |        | 154.00              | 151.49              | -0.04             |        | 2.68              | 2.65             | -0.02             |        |
| Mongolia    | (9.33,<br>14.17)  | (9.79,<br>13.54)  | (-0.00,<br>0.01)  | 0.180  | —                | —               | —                 | —      | (145.15,<br>163.28) | (145.22,<br>157.99) | (-0.33,<br>0.26)  | 0.794  | (1.62,<br>4.23)   | (1.89,<br>3.67)  | (-0.31,<br>0.28)  | 0.900  |
|             | 13.48             | 13.43             | -0.01             |        | 2.40             | 2.12            | -0.51             |        | 148.15              | 117.39              | -1.00             |        | 2.55              | 2.03             | -0.98             |        |
| Montenegro  | (9.33,<br>18.88)  | (8.94,<br>19.46)  | (-0.02,<br>-0.01) | <0.001 | (0.89,<br>5.23)  | (0.72,<br>5.11) | (-0.74,<br>-0.28) | <0.001 | (133.55,<br>163.95) | (103.60,<br>132.62) | (-1.93,<br>-0.07) | 0.036  | (0.98,<br>5.44)   | (0.62,<br>5.11)  | (-1.88,<br>-0.08) | 0.033  |
|             | 8.70              | 8.73              | 0.01              |        | —                | —               | —                 | —      | 30.33               | 21.09               | -1.20             |        | 0.49              | 0.33             | -1.28             |        |
| Morocco     | (8.14,<br>9.30)   | (8.26,<br>9.22)   | (0.01,<br>0.01)   | <0.001 | —                | —               | —                 | —      | (29.26,<br>31.43)   | (20.36,<br>21.85)   | (-1.45,<br>-0.95) | <0.001 | (0.36,<br>0.65)   | (0.24,<br>0.44)  | (-1.60,<br>-0.95) | <0.001 |
|             | 9.90              | 9.97              | 0.02              |        | —                | —               | —                 | —      | 26.22               | 39.71               | 1.49              |        | 0.45              | 0.69             | 1.50              |        |
| Mozambique  | (8.99,<br>10.89)  | (9.36,<br>10.60)  | (0.01,<br>0.04)   | 0.001  | —                | —               | —                 | —      | (24.67,<br>27.84)   | (38.44,<br>41.00)   | (1.29,<br>1.68)   | <0.001 | (0.27,<br>0.72)   | (0.53,<br>0.88)  | (1.38,<br>1.62)   | <0.001 |
|             | 10.21             | 10.16             | -0.02             |        | —                | —               | —                 | —      | 46.99               | 40.54               | -0.50             |        | 0.79              | 0.68             | -0.52             |        |
| Myanmar     | (9.73,<br>10.71)  | (9.75,<br>10.59)  | (-0.02,<br>-0.01) | <0.001 | —                | —               | —                 | —      | (45.94,<br>48.07)   | (39.70,<br>41.39)   | (-0.70,<br>-0.29) | <0.001 | (0.66,<br>0.94)   | (0.57,<br>0.79)  | (-0.67,<br>-0.37) | <0.001 |
|             | 10.02             | 10.03             | 0.01              |        | —                | —               | —                 | —      | 55.42               | 54.35               | -0.01             |        | 0.92              | 0.90             | -0.04             |        |
| Namibia     | (7.46,<br>13.25)  | (8.16,<br>12.22)  | (-0.00,<br>0.01)  | 0.123  | —                | —               | —                 | —      | (49.11,<br>62.38)   | (49.86,<br>59.15)   | (-0.26,<br>0.25)  | 0.965  | (0.28,<br>2.36)   | (0.41,<br>1.74)  | (-0.26,<br>0.19)  | 0.749  |
|             | 10.89             | 10.91             | 0.01              |        | —                | —               | —                 | —      | 88.78               | 100.77              | 0.43              |        | 1.51              | 1.71             | 0.43              |        |
| Nauru       | (0.00,<br>123.84) | (0.01,<br>113.10) | (0.00,<br>0.01)   | 0.016  | —                | —               | —                 | —      | (21.08,<br>248.15)  | (29.78,<br>252.36)  | (0.37,<br>0.50)   | <0.001 | (0.00,<br>106.66) | (0.00,<br>96.47) | (0.34,<br>0.51)   | <0.001 |
|             | 10.02             | 9.92              | -0.03             |        | —                | —               | —                 | —      | 6.35                | 6.35                | 0.02              |        | 0.11              | 0.10             | -0.38             |        |
| Nepal       | (9.29,<br>10.79)  | (9.37,<br>10.48)  | (-0.04,<br>-0.03) | <0.001 | —                | —               | —                 | —      | (5.77,<br>6.98)     | (5.91,<br>6.81)     | (-0.09,<br>0.12)  | 0.786  | (0.04,<br>0.22)   | (0.05,<br>0.18)  | (-1.06,<br>0.31)  | 0.279  |
|             | 12.56             | 12.52             | -0.01             |        | —                | —               | —                 | —      | 48.98               | 17.43               | -3.49             |        | 0.79              | 0.27             | -3.64             |        |
| Netherlands | (11.68,<br>13.49) | (11.58,<br>13.51) | (-0.02,<br>-0.00) | <0.001 | —                | —               | —                 | —      | (47.23,<br>50.77)   | (16.33,<br>18.59)   | (-3.84,<br>-3.13) | <0.001 | (0.58,<br>1.05)   | (0.15,<br>0.45)  | (-4.03,<br>-3.25) | <0.001 |
|             | 12.46             | 12.98             | 0.14              |        | 0.98             | 0.66            | -1.52             |        | 115.49              | 62.93               | -2.11             |        | 1.91              | 1.04             | -2.16             |        |
| New Zealand | (10.67,<br>14.46) | (11.17,<br>15.00) | (0.07,<br>0.22)   | <0.001 | (0.53,<br>1.66)  | (0.31,<br>1.24) | (-2.65,<br>-0.38) | 0.009  | (109.90,<br>121.29) | (58.89,<br>67.19)   | (-2.83,<br>-1.39) | <0.001 | (1.25,<br>2.79)   | (0.58,<br>1.73)  | (-2.85,<br>-1.46) | <0.001 |
|             | 9.16              | 9.23              | 0.03              | <0.001 | —                | —               | —                 | —      | 20.53               | 17.65               | -0.65             | 0.005  | 0.34              | 0.28             | -0.76             | 0.002  |

|                          |         |         |         |        |        |        |         |        |         |         |         |        |         |         |         |        |
|--------------------------|---------|---------|---------|--------|--------|--------|---------|--------|---------|---------|---------|--------|---------|---------|---------|--------|
|                          | (7.61,  | (8.13,  | (0.02,  |        |        |        |         |        | (18.16, | (16.12, | (-1.11, |        | (0.10,  | (0.12,  | (-1.23, |        |
|                          | 10.95)  | 10.43)  | 0.03)   |        |        |        |         |        | 23.15)  | 19.29)  | -0.20)  |        | 0.87)   | 0.56)   | -0.28)  |        |
|                          | 10.00   | 10.04   | 0.01    |        |        |        |         |        | 71.07   | 57.98   | -0.71   |        | 1.18    | 0.96    | -0.69   |        |
| Niger                    | (8.82,  | (9.32,  | (0.01,  | <0.001 | —      | —      | —       | —      | (67.84, | (56.23, | (-0.94, | <0.001 | (0.79,  | (0.74,  | (-0.97, | <0.001 |
|                          | 11.31)  | 10.80)  | 0.02)   |        |        |        |         |        | 74.42)  | 59.77)  | -0.47)  |        | 1.70)   | 1.22)   | -0.41)  |        |
|                          | 11.12   | 11.00   | -0.04   |        |        |        |         |        | 69.84   | 44.85   | -1.51   |        | 1.16    | 0.74    | -1.53   |        |
| Nigeria                  | (10.76, | (10.77, | (-0.04, | <0.001 | —      | —      | —       | —      | (68.92, | (44.37, | (-1.66, | <0.001 | (1.05,  | (0.68,  | (-1.71, | <0.001 |
|                          | 11.49)  | 11.24)  | -0.03)  |        |        |        |         |        | 70.77)  | 45.32)  | -1.35)  |        | 1.29)   | 0.80)   | -1.34)  |        |
|                          | 11.01   | 10.94   | -0.02   |        |        |        |         |        | 74.84   | 65.06   | -0.49   |        | 1.27    | 1.08    | -0.55   |        |
| Niue                     | (0.00,  | (0.00,  | (-0.03, | <0.001 | —      | —      | —       | —      | (0.16,  | (0.00,  | (-0.64, | <0.001 | (0.00,  | (0.00,  | (-0.70, | <0.001 |
|                          | 539.01) | 753.36) | -0.01)  |        |        |        |         |        | 659.01) | 854.92) | -0.34)  |        | 520.31) | 734.24) | -0.40)  |        |
|                          | 13.42   | 13.51   | 0.02    |        |        |        |         |        | 82.17   | 77.04   | -0.19   |        | 1.38    | 1.30    | -0.16   |        |
| North Macedonia          | (11.03, | (11.03, | (0.00,  | 0.033  | —      | —      | —       | —      | (76.08, | (71.10, | (-0.61, | 0.370  | (0.70,  | (0.64,  | (-0.61, | 0.491  |
|                          | 16.20)  | 16.45)  | 0.05)   |        |        |        |         |        | 88.63)  | 83.40)  | 0.23)   |        | 2.46)   | 2.45)   | 0.29)   |        |
|                          | 10.85   | 11.05   | 0.09    |        |        |        |         |        | 86.64   | 78.44   | -0.42   |        | 1.48    | 1.33    | -0.53   |        |
| Northern Mariana Islands | (1.82,  | (0.64,  | (-0.04, | 0.186  | —      | —      | —       | —      | (53.56, | (35.16, | (-1.13, | 0.256  | (0.00,  | (0.00,  | (-1.37, | 0.223  |
|                          | 37.24)  | 60.63)  | 0.22)   |        |        |        |         |        | 134.50) | 155.79) | 0.30)   |        | 22.44)  | 45.83)  | 0.32)   |        |
|                          | 13.41   | 13.43   | 0.02    |        | 1.44   | 0.27   | -5.79   |        | 44.05   | 27.29   | -1.64   |        | 0.68    | 0.41    | -1.71   |        |
| Norway                   | (11.68, | (11.78, | (0.01,  | <0.001 | (0.92, | (0.09, | (-7.89, | <0.001 | (40.87, | (24.92, | (-2.51, | <0.001 | (0.34,  | (0.17,  | (-2.78, | 0.002  |
|                          | 15.34)  | 15.27)  | 0.03)   |        | 2.17)  | 0.65)  | -3.64)  |        | 47.43)  | 29.83)  | -0.76)  |        | 1.23)   | 0.86)   | -0.64)  |        |
|                          | 9.18    | 9.26    | 0.04    |        |        |        |         |        | 36.18   | 35.01   | -0.03   |        | 0.57    | 0.55    | -0.08   |        |
| Oman                     | (7.20,  | (8.04,  | (0.01,  | 0.017  | —      | —      | —       | —      | (32.11, | (32.54, | (-0.43, | 0.887  | (0.17,  | (0.29,  | (-0.50, | 0.714  |
|                          | 11.54)  | 10.65)  | 0.07)   |        |        |        |         |        | 40.64)  | 37.66)  | 0.37)   |        | 1.41)   | 1.03)   | 0.35)   |        |
|                          | 11.21   | 11.14   | -0.02   |        |        |        |         |        | 8.83    | 12.14   | 1.13    |        | 0.15    | 0.20    | 0.99    |        |
| Pakistan                 | (10.87, | (10.92, | (-0.03, | <0.001 | —      | —      | —       | —      | (8.53,  | (11.91, | (1.01,  | <0.001 | (0.11,  | (0.17,  | (0.69,  | <0.001 |
|                          | 11.55)  | 11.36)  | -0.02)  |        |        |        |         |        | 9.14)   | 12.38)  | 1.24)   |        | 0.19)   | 0.23)   | 1.29)   |        |
|                          | 11.00   | 11.35   | 0.12    |        |        |        |         |        | 25.64   | 26.68   | 0.09    |        | 0.43    | 0.45    | 0.14    |        |
| Palau                    | (0.10,  | (0.07,  | (0.07,  | <0.001 | —      | —      | —       | —      | (2.46,  | (2.37,  | (-0.13, | 0.405  | (0.00,  | (0.00,  | (-0.07, | 0.193  |
|                          | 78.89)  | 89.42)  | 0.16)   |        |        |        |         |        | 103.40) | 113.91) | 0.31)   |        | 59.75)  | 69.67)  | 0.35)   |        |
|                          | 8.76    | 8.75    | -0.00   |        | 0.99   | 1.88   | 2.69    |        | 48.57   | 29.49   | -1.73   |        | 0.77    | 0.46    | -1.82   |        |
| Palestine                | (6.69,  | (7.51,  | (-0.01, | 0.233  | (0.36, | (1.28, | (-0.02, | 0.052  | (43.49, | (27.16, | (-2.15, | <0.001 | (0.26,  | (0.21,  | (-2.30, | <0.001 |
|                          | 11.35)  | 10.17)  | 0.00)   |        | 2.26)  | 2.67)  | 5.48)   |        | 54.15)  | 31.99)  | -1.30)  |        | 1.91)   | 0.89)   | -1.35)  |        |
| Panama                   | 9.24    | 9.25    | 0.00    | <0.001 | —      | —      | —       | —      | 44.86   | 64.17   | 1.34    | <0.001 | 0.74    | 1.07    | 1.37    | <0.001 |



|                     |         |         |         |        |         |        |         |        |         |          |         |        |        |        |         |        |
|---------------------|---------|---------|---------|--------|---------|--------|---------|--------|---------|----------|---------|--------|--------|--------|---------|--------|
|                     | (7.42,  | (7.82,  | (0.00,  |        |         |        |         |        | (40.72, | (60.28,  | (0.88,  |        | (0.30, | (0.63, | (0.90,  |        |
|                     | 11.39)  | 10.87)  | 0.01)   |        |         |        |         |        | 49.33)  | 68.24)   | 1.80)   |        | 1.56)  | 1.72)  | 1.84)   |        |
|                     | 10.96   | 10.93   | -0.01   |        |         |        |         |        | 43.49   | 53.58    | 0.66    |        | 0.74   | 0.91   | 0.64    |        |
| Papua New Guinea    | (9.39,  | (9.94,  | (-0.01, | <0.001 | —       | —      | —       | —      | (40.21, | (51.32,  | (0.44,  | <0.001 | (0.37, | (0.63, | (0.40,  | <0.001 |
|                     | 12.73)  | 12.00)  | -0.01)  |        |         |        |         |        | 46.98)  | 55.92)   | 0.88)   |        | 1.35)  | 1.26)  | 0.88)   |        |
|                     | 9.24    | 9.26    | 0.01    |        |         |        |         |        | 33.59   | 23.15    | -1.23   |        | 0.57   | 0.39   | -1.24   |        |
| Paraguay            | (7.77,  | (8.20,  | (0.01,  | <0.001 | —       | —      | —       | —      | (30.69, | (21.44,  | (-1.61, | <0.001 | (0.25, | (0.19, | (-1.63, | <0.001 |
|                     | 10.92)  | 10.43)  | 0.01)   |        |         |        |         |        | 36.70)  | 24.96)   | -0.85)  |        | 1.12)  | 0.69)  | -0.86)  |        |
|                     | 9.08    | 9.12    | 0.02    |        |         |        |         |        | 26.12   | 18.58    | -1.12   |        | 0.43   | 0.30   | -1.21   |        |
| Peru                | (8.44,  | (8.62,  | (0.01,  | <0.001 | —       | —      | —       | —      | (25.04, | (17.86,  | (-1.54, | <0.001 | (0.30, | (0.21, | (-1.79, | <0.001 |
|                     | 9.75)   | 9.64)   | 0.02)   |        |         |        |         |        | 27.23)  | 19.31)   | -0.71)  |        | 0.59)  | 0.41)  | -0.61)  |        |
|                     | 11.26   | 11.22   | -0.01   |        |         |        |         |        | 13.70   | 47.44    | 4.43    |        | 0.23   | 0.80   | 4.51    |        |
| Philippines         | (10.85, | (10.92, | (-0.02, | 0.004  | —       | —      | —       | —      | (13.23, | (46.80,  | (3.88,  | <0.001 | (0.17, | (0.72, | (3.68,  | <0.001 |
|                     | 11.68)  | 11.54)  | -0.00)  |        |         |        |         |        | 14.18)  | 48.08)   | 4.97)   |        | 0.30)  | 0.89)  | 5.35)   |        |
|                     | 15.06   | 15.09   | 0.02    |        | 0.14    | 0.45   | 3.93    |        | 69.75   | 61.82    | -0.51   |        | 1.18   | 1.06   | -0.36   |        |
| Poland              | (14.43, | (14.40, | (0.00,  | 0.016  | (0.09,  | (0.36, | (2.39,  | <0.001 | (68.43, | (60.52,  | (-0.84, | 0.002  | (1.01, | (0.90, | (-0.98, | 0.251  |
|                     | 15.71)  | 15.80)  | 0.03)   |        | 0.22)   | 0.57)  | 5.50)   |        | 71.10)  | 63.13)   | -0.19)  |        | 1.37)  | 1.25)  | 0.26)   |        |
|                     | 13.15   | 13.14   | -0.00   |        |         |        |         |        | 32.30   | 17.25    | -2.19   |        | 0.52   | 0.28   | -2.07   |        |
| Portugal            | (12.02, | (11.88, | (-0.01, | 0.506  | —       | —      | —       | —      | (30.51, | (15.83,  | (-3.02, | <0.001 | (0.31, | (0.13, | (-3.17, | <0.001 |
|                     | 14.37)  | 14.51)  | 0.00)   |        |         |        |         |        | 34.16)  | 18.77)   | -1.36)  |        | 0.80)  | 0.54)  | -0.96)  |        |
|                     | 9.17    | 9.20    | 0.01    |        |         |        |         |        | 64.52   | 30.75    | -2.47   |        | 1.07   | 0.51   | -2.57   |        |
| Puerto Rico         | (7.66,  | (7.51,  | (0.00,  | 0.002  | —       | —      | —       | —      | (60.36, | (27.62,  | (-3.01, | <0.001 | (0.60, | (0.18, | (-3.11, | <0.001 |
|                     | 10.91)  | 11.15)  | 0.02)   |        |         |        |         |        | 68.88)  | 34.15)   | -1.93)  |        | 1.78)  | 1.13)  | -2.02)  |        |
|                     | 9.38    | 9.63    | 0.09    |        | 14.67   | 6.59   | -2.71   |        | 45.73   | 27.25    | -1.76   |        | 0.69   | 0.40   | -1.84   |        |
| Qatar               | (5.76,  | (8.00,  | (0.08,  | <0.001 | (10.52, | (5.58, | (-3.10, | <0.001 | (37.00, | (24.38,  | (-2.25, | <0.001 | (0.05, | (0.13, | (-2.19, | <0.001 |
|                     | 14.95)  | 11.66)  | 0.11)   |        | 20.54)  | 7.96)  | -2.31)  |        | 56.29)  | 30.51)   | -1.27)  |        | 3.87)  | 1.25)  | -1.49)  |        |
|                     | 14.85   | 15.07   | 0.05    |        | 0.97    |        |         |        | 34.52   | 19.93    | -1.87   |        | 0.53   | 0.30   | -1.90   |        |
| Republic of Korea   | (14.33, | (14.48, | (0.04,  | <0.001 | (0.83,  | —      | —       | —      | (33.73, | (19.27,  | (-2.03, | <0.001 | (0.44, | (0.22, | (-2.48, | <0.001 |
|                     | 15.38)  | 15.67)  | 0.06)   |        | 1.12)   |        |         |        | 35.33)  | 20.61)   | -1.71)  |        | 0.64)  | 0.39)  | -1.31)  |        |
|                     | 12.39   | 12.53   | 0.04    |        |         |        |         |        | 68.30   | 108.51   | 1.54    |        | 1.18   | 1.89   | 1.57    |        |
| Republic of Moldova | (10.79, | (10.64, | (0.04,  | <0.001 | —       | —      | —       | —      | (64.58, | (103.24, | (0.34,  | 0.012  | (0.74, | (1.26, | (0.32,  | 0.014  |
|                     | 14.18)  | 14.69)  | 0.04)   |        |         |        |         |        | 72.20)  | 114.03)  | 2.76)   |        | 1.81)  | 2.79)  | 2.83)   |        |
| Romania             | 11.49   | 11.55   | -0.00   | 0.610  | —       | —      | —       | —      | 126.30  | 105.75   | -0.50   | 0.064  | 2.21   | 1.84   | -0.53   | 0.075  |

|                                  |         |         |         |        |        |        |         |        |          |          |         |        |        |         |         |        |
|----------------------------------|---------|---------|---------|--------|--------|--------|---------|--------|----------|----------|---------|--------|--------|---------|---------|--------|
|                                  | (10.78, | (10.67, | (-0.02, |        |        |        |         |        | (123.97, | (103.19, | (-1.03, |        | (1.91, | (1.52,  | (-1.10, |        |
|                                  | 12.23)  | 12.48)  | 0.01)   |        |        |        |         |        | 128.66)  | 108.36)  | 0.03)   |        | 2.55)  | 2.22)   | 0.05)   |        |
|                                  | 13.62   | 13.62   | 0.00    |        | 1.42   | 1.03   | -1.15   |        | 315.79   | 758.12   | 3.25    |        | 5.54   | 13.52   | 3.31    |        |
| Russian Federation               | (13.32, | (13.28, | (-0.00, | 0.907  | (1.33, | (0.96, | (-1.43, | <0.001 | (314.40, | (755.85, | (1.96,  | <0.001 | (5.36, | (13.22, | (2.00,  | <0.001 |
|                                  | 13.93)  | 13.97)  | 0.00)   |        | 1.52)  | 1.11)  | -0.87)  |        | 317.18)  | 760.39)  | 4.55)   |        | 5.73)  | 13.82)  | 4.63)   |        |
|                                  | 10.04   | 10.05   | 0.00    |        |        |        |         |        | 65.19    | 48.35    | -1.03   |        | 1.13   | 0.83    | -1.05   |        |
| Rwanda                           | (8.86,  | (9.21,  | (-0.01, | 0.767  | —      | —      | —       | —      | (62.03,  | (46.45,  | (-1.25, | <0.001 | (0.74, | (0.60,  | (-1.27, | <0.001 |
|                                  | 11.35)  | 10.95)  | 0.02)   |        |        |        |         |        | 68.49)   | 50.32)   | -0.81)  |        | 1.65)  | 1.13)   | -0.83)  |        |
| Saint Kitts and Nevis            | 9.22    | 9.23    | 0.00    |        |        |        |         |        | 174.90   | 86.66    | -2.29   |        | 3.03   | 1.45    | -2.38   |        |
|                                  | (0.72,  | (1.21,  | (0.00,  | 0.010  | —      | —      | —       | —      | (116.51, | (52.94,  | (-3.53, | <0.001 | (0.00, | (0.00,  | (-3.80, | 0.001  |
|                                  | 41.30)  | 33.76)  | 0.01)   |        |        |        |         |        | 253.41)  | 134.75)  | -1.03)  |        | 31.31) | 20.88)  | -0.94)  |        |
|                                  | 9.19    | 9.24    | 0.02    |        |        |        |         |        | 128.48   | 120.99   | -0.25   |        | 2.21   | 2.07    | -0.28   |        |
| Saint Lucia                      | (2.89,  | (3.48,  | (0.02,  | <0.001 | —      | —      | —       | —      | (98.49,  | (96.42,  | (-0.73, | 0.296  | (0.06, | (0.14,  | (-0.75, | 0.260  |
|                                  | 23.13)  | 20.08)  | 0.02)   |        |        |        |         |        | 165.32)  | 150.14)  | 0.22)   |        | 13.17) | 9.59)   | 0.20)   |        |
| Saint Vincent and the Grenadines | 9.26    | 9.25    | -0.00   |        |        |        |         |        | 48.68    | 55.72    | 0.55    |        | 0.83   | 0.94    | 0.56    |        |
|                                  | (2.48,  | (2.45,  | (-0.01, | 0.081  | —      | —      | —       | —      | (29.51,  | (35.48,  | (-0.10, | 0.095  | (0.00, | (0.00,  | (-0.12, | 0.108  |
|                                  | 25.76)  | 24.23)  | 0.00)   |        |        |        |         |        | 76.71)   | 83.48)   | 1.21)   |        | 13.25) | 11.02)  | 1.24)   |        |
|                                  | 11.05   | 10.95   | -0.03   |        |        |        |         |        | 60.12    | 71.58    | 0.60    |        | 1.02   | 1.22    | 0.62    |        |
| Samoa                            | (4.36,  | (4.94,  | (-0.04, | <0.001 | —      | —      | —       | —      | (41.43,  | (53.73,  | (0.58,  | <0.001 | (0.00, | (0.02,  | (0.54,  | <0.001 |
|                                  | 24.35)  | 21.49)  | -0.03)  |        |        |        |         |        | 85.03)   | 93.73)   | 0.63)   |        | 10.24) | 7.84)   | 0.70)   |        |
|                                  | 12.49   | 12.25   | -0.07   |        |        |        |         |        | 36.36    | 30.83    | -0.55   |        | 0.58   | 0.49    | -0.56   |        |
| San Marino                       | (0.45,  | (0.60,  | (-0.08, | <0.001 | —      | —      | —       | —      | (8.14,   | (6.88,   | (-0.65, | <0.001 | (0.00, | (0.00,  | (-0.64, | <0.001 |
|                                  | 66.38)  | 61.01)  | -0.06)  |        |        |        |         |        | 103.83)  | 89.43)   | -0.45)  |        | 44.94) | 40.27)  | -0.48)  |        |
| Sao Tome and Principe            | 10.02   | 10.08   | 0.02    |        |        |        |         |        | 61.11    | 62.22    | -0.05   |        | 1.04   | 1.02    | 0.14    |        |
|                                  | (2.61,  | (4.48,  | (0.02,  | <0.001 | —      | —      | —       | —      | (38.14,  | (46.57,  | (-0.73, | 0.878  | (0.00, | (0.01,  | (-0.58, | 0.696  |
|                                  | 28.67)  | 19.76)  | 0.03)   |        |        |        |         |        | 94.18)   | 81.64)   | 0.63)   |        | 15.49) | 6.77)   | 0.88)   |        |
|                                  | 9.00    | 9.00    | 0.00    |        |        |        |         |        | 63.88    | 46.54    | -1.11   |        | 1.04   | 0.75    | -1.14   |        |
| Saudi Arabia                     | (8.29,  | (8.56,  | (-0.01, | 0.948  | —      | —      | —       | —      | (61.94,  | (45.55,  | (-1.32, | <0.001 | (0.80, | (0.63,  | (-1.22, | <0.001 |
|                                  | 9.77)   | 9.45)   | 0.01)   |        |        |        |         |        | 65.87)   | 47.54)   | -0.89)  |        | 1.32)  | 0.89)   | -1.06)  |        |
|                                  | 9.98    | 10.05   | 0.02    |        |        |        |         |        | 64.26    | 57.66    | -0.43   |        | 1.06   | 0.94    | -0.45   |        |
| Senegal                          | (8.79,  | (9.25,  | (0.02,  | <0.001 | —      | —      | —       | —      | (61.19,  | (55.73,  | (-0.97, | 0.125  | (0.69, | (0.71,  | (-0.99, | 0.105  |
|                                  | 11.30)  | 10.90)  | 0.03)   |        |        |        |         |        | 67.46)   | 59.64)   | 0.12)   |        | 1.56)  | 1.23)   | 0.10)   |        |
| Serbia                           | 12.69   | 12.73   | 0.00    | 0.946  | —      | —      | —       | —      | 79.30    | 60.05    | -1.00   | <0.001 | 1.34   | 1.03    | -0.87   | <0.001 |

|                 |         |         |         |        |        |        |         |        |          |         |         |        |        |        |         |        |
|-----------------|---------|---------|---------|--------|--------|--------|---------|--------|----------|---------|---------|--------|--------|--------|---------|--------|
|                 | (11.53, | (11.44, | (-0.05, |        |        |        |         |        | (76.39,  | (57.30, | (-1.30, |        | (0.99, | (0.70, | (-1.30, |        |
|                 | 13.94)  | 14.12)  | 0.05)   |        |        |        |         |        | 82.29)   | 62.91)  | -0.70)  |        | 1.78)  | 1.47)  | -0.44)  |        |
|                 | 10.29   | 10.51   | 0.07    |        |        |        |         |        | 121.90   | 111.18  | -0.31   |        | 2.09   | 1.88   | -0.28   |        |
| Seychelles      | (2.22,  | (2.87,  | (0.06,  | <0.001 | —      | —      | —       | —      | (84.56,  | (80.99, | (-0.76, | 0.183  | (0.00, | (0.02, | (-0.98, | 0.445  |
|                 | 32.03)  | 28.01)  | 0.09)   |        |        |        |         |        | 171.26)  | 149.84) | 0.15)   |        | 19.84) | 14.80) | 0.43)   |        |
|                 | 9.97    | 10.02   | 0.02    |        |        |        |         |        | 65.82    | 63.38   | -0.12   |        | 1.09   | 1.04   | -0.15   |        |
| Sierra Leone    | (8.33,  | (8.97,  | (0.01,  | <0.001 | —      | —      | —       | —      | (61.50,  | (60.70, | (-0.30, | 0.196  | (0.60, | (0.72, | (-0.35, | 0.120  |
|                 | 11.85)  | 11.17)  | 0.03)   |        |        |        |         |        | 70.37)   | 66.16)  | 0.06)   |        | 1.85)  | 1.47)  | 0.04)   |        |
|                 | 14.86   | 14.78   | -0.02   |        | 10.40  | 4.26   | -3.14   |        | 192.25   | 64.49   | -3.68   |        | 3.19   | 1.02   | -3.84   |        |
| Singapore       | (12.97, | (13.07, | (-0.07, | 0.500  | (8.88, | (3.48, | (-4.71, | <0.001 | (185.38, | (60.98, | (-4.30, | <0.001 | (2.36, | (0.63, | (-4.51, | <0.001 |
|                 | 16.96)  | 16.70)  | 0.03)   |        | 12.13) | 5.22)  | -1.53)  |        | 199.33)  | 68.19)  | -3.06)  |        | 4.24)  | 1.62)  | -3.16)  |        |
|                 | 14.54   | 14.59   | 0.00    |        |        |        |         |        | 70.55    | 62.11   | -0.47   |        | 1.19   | 1.05   | -0.46   |        |
| Slovakia        | (12.93, | (12.84, | (-0.03, | 0.933  | —      | —      | —       | —      | (67.01,  | (58.61, | (-0.88, | 0.028  | (0.77, | (0.65, | (-0.88, | 0.035  |
|                 | 16.30)  | 16.54)  | 0.03)   |        |        |        |         |        | 74.24)   | 65.79)  | -0.05)  |        | 1.76)  | 1.67)  | -0.03)  |        |
|                 | 13.29   | 13.41   | 0.03    |        | 1.99   |        |         |        | 90.48    | 18.36   | -5.34   |        | 1.57   | 0.30   | -5.61   |        |
| Slovenia        | (10.83, | (10.57, | (-0.04, | 0.429  | (1.18, | —      | —       | —      | (84.08,  | (15.17, | (-6.29, | <0.001 | (0.83, | (0.03, | (-6.21, | <0.001 |
|                 | 16.16)  | 16.85)  | 0.09)   |        | 3.22)  |        |         |        | 97.28)   | 22.11)  | -4.39)  |        | 2.74)  | 1.32)  | -5.01)  |        |
|                 | 10.91   | 10.87   | -0.01   |        |        |        |         |        | 61.02    | 72.81   | 0.60    |        | 1.05   | 1.25   | 0.59    |        |
| Solomon Islands | (5.79,  | (7.22,  | (-0.02, | <0.001 | —      | —      | —       | —      | (47.03,  | (62.52, | (0.41,  | <0.001 | (0.03, | (0.26, | (0.40,  | <0.001 |
|                 | 19.23)  | 15.80)  | -0.01)  |        |        |        |         |        | 78.15)   | 84.35)  | 0.79)   |        | 6.09)  | 3.70)  | 0.78)   |        |
|                 | 10.07   | 10.13   | 0.02    |        |        |        |         |        | 49.40    | 42.80   | -0.47   |        | 0.85   | 0.73   | -0.51   |        |
| Somalia         | (8.84,  | (9.40,  | (0.01,  | 0.001  | —      | —      | —       | —      | (46.59,  | (41.25, | (-0.60, | <0.001 | (0.52, | (0.54, | (-0.75, | <0.001 |
|                 | 11.44)  | 10.89)  | 0.04)   |        |        |        |         |        | 52.34)   | 44.39)  | -0.33)  |        | 1.33)  | 0.97)  | -0.27)  |        |
|                 | 11.06   | 11.14   | 0.02    |        |        |        |         |        | 101.59   | 67.06   | -1.38   |        | 1.73   | 1.13   | -1.42   |        |
| South Africa    | (10.54, | (10.72, | (0.02,  | <0.001 | —      | —      | —       | —      | (99.97,  | (66.04, | (-2.17, | 0.001  | (1.52, | (1.00, | (-2.19, | <0.001 |
|                 | 11.61)  | 11.57)  | 0.03)   |        |        |        |         |        | 103.24)  | 68.10)  | -0.57)  |        | 1.96)  | 1.27)  | -0.64)  |        |
|                 | 10.16   | 9.96    | -0.07   |        |        |        |         |        | 40.76    | 30.37   | -1.01   |        | 0.71   | 0.52   | -1.08   |        |
| South Sudan     | (8.84,  | (8.87,  | (-0.08, | <0.001 | —      | —      | —       | —      | (37.92,  | (28.40, | (-1.41, | <0.001 | (0.38, | (0.29, | (-1.53, | <0.001 |
|                 | 11.64)  | 11.15)  | -0.06)  |        |        |        |         |        | 43.76)   | 32.46)  | -0.61)  |        | 1.23)  | 0.87)  | -0.62)  |        |
|                 | 12.51   | 12.50   | -0.00   |        |        |        |         |        | 49.59    | 29.23   | -1.86   |        | 0.79   | 0.47   | -1.83   |        |
| Spain           | (11.94, | (11.90, | (-0.01, | 0.697  | —      | —      | —       | —      | (48.46,  | (28.32, | (-2.38, | <0.001 | (0.65, | (0.36, | (-2.39, | <0.001 |
|                 | 13.09)  | 13.14)  | 0.01)   |        |        |        |         |        | 50.74)   | 30.17)  | -1.32)  |        | 0.95)  | 0.60)  | -1.27)  |        |
| Sri Lanka       | 10.24   | 10.18   | -0.02   | <0.001 | —      | 0.87   | —       | —      | 156.20   | 90.65   | -1.81   | <0.001 | 2.64   | 1.53   | -1.79   | <0.001 |

|                               |                            |                          |                            |        |                   |                 |                   |        |                            |                            |                            |        |                         |                         |                            |
|-------------------------------|----------------------------|--------------------------|----------------------------|--------|-------------------|-----------------|-------------------|--------|----------------------------|----------------------------|----------------------------|--------|-------------------------|-------------------------|----------------------------|
|                               | (9.53,<br>11.00)           | (9.50,<br>10.91)         | (-0.02,<br>-0.02)          |        | (0.68,<br>1.08)   |                 |                   |        | (153.32,<br>159.12)        | (88.60,<br>92.74)          | (-2.59,<br>-1.03)          |        | (2.28,<br>3.05)         | (1.27,<br>1.82)         | (-2.52,<br>-1.06)          |
|                               | 8.67                       | 8.70                     | 0.01                       |        |                   |                 |                   |        | 36.90                      | 28.41                      | -0.91                      |        | 0.60                    | 0.45                    | -0.99                      |
| Sudan                         | (8.00,<br>9.38)            | (8.26,<br>9.16)          | (0.00,<br>0.02)            | 0.014  | —                 | —               | —                 | —      | (35.52,<br>38.34)          | (27.61,<br>29.22)          | (-1.00,<br>-0.83)          | <0.001 | (0.43,<br>0.81)         | (0.36,<br>0.57)         | (-1.15,<br>-0.83)          |
|                               | 9.27                       | 9.22                     | -0.02                      |        |                   |                 |                   |        | 79.10                      | 79.99                      | 0.08                       |        | 1.34                    | 1.35                    | -0.01                      |
| Suriname                      | (5.07,<br>15.91)           | (5.61,<br>14.29)         | (-0.03,<br>-0.02)          | <0.001 | —                 | —               | —                 | —      | (65.26,<br>95.25)          | (68.49,<br>92.90)          | (-1.15,<br>1.32)           | 0.898  | (0.15,<br>5.43)         | (0.27,<br>4.05)         | (-1.71,<br>1.71)           |
|                               | 14.26                      | 14.22                    | -0.02                      |        | 25.11             | 3.03            | -6.72             |        | 75.50                      | 40.03                      | -2.14                      |        | 1.15                    | 0.61                    | -2.22                      |
| Sweden                        | (12.93,<br>15.69)          | (12.94,<br>15.60)        | (-0.05,<br>0.01)           | 0.245  | (23.33,<br>27.00) | (2.49,<br>3.67) | (-8.10,<br>-5.31) | <0.001 | (72.40,<br>78.70)          | (37.87,<br>42.29)          | (-2.30,<br>-1.99)          | <0.001 | (0.80,<br>1.62)         | (0.37,<br>0.95)         | (-2.38,<br>-2.05)          |
|                               | 10.06                      | 10.02                    | -0.03                      |        |                   |                 |                   |        | 43.01                      | 17.64                      | -3.04                      |        | 0.69                    | 0.28                    | -3.09                      |
| Switzerland                   | (8.88,<br>11.36)           | (8.87,<br>11.30)         | (-0.08,<br>0.01)           | 0.151  | —                 | —               | —                 | —      | (40.53,<br>45.61)          | (16.12,<br>19.28)          | (-3.38,<br>-2.71)          | <0.001 | (0.41,<br>1.10)         | (0.12,<br>0.58)         | (-3.53,<br>-2.64)          |
| Syrian Arab<br>Republic       | 8.75<br>(7.90,<br>9.68)    | 8.54<br>(7.72,<br>9.43)  | -0.09<br>(-0.11,<br>-0.06) | <0.001 | —                 | —               | —                 | —      | 39.13<br>(37.32,<br>41.01) | 27.08<br>(25.64,<br>28.58) | -1.29<br>(-1.46,<br>-1.12) | <0.001 | 0.63<br>(0.41,<br>0.92) | 0.43<br>(0.26,<br>0.67) | -1.34<br>(-1.62,<br>-1.07) |
| Taiwan (Province<br>of China) | 10.83<br>(10.16,<br>11.52) | 9.88<br>(9.18,<br>10.62) | -0.32<br>(-0.33,<br>-0.31) | <0.001 | —                 | —               | —                 | —      | 37.60<br>(36.36,<br>38.87) | 42.31<br>(40.93,<br>43.74) | 0.39<br>(0.07,<br>0.72)    | 0.018  | 0.59<br>(0.45,<br>0.77) | 0.69<br>(0.53,<br>0.90) | 0.53<br>(0.19,<br>0.88)    |
|                               | 11.51                      | 11.57                    | 0.02                       |        |                   |                 |                   |        | 20.64                      | 22.58                      | 0.37                       |        | 0.35                    | 0.39                    | 0.41                       |
| Tajikistan                    | (10.07,<br>13.13)          | (10.54,<br>12.68)        | (0.01,<br>0.02)            | <0.001 | —                 | —               | —                 | —      | (18.60,<br>22.85)          | (21.12,<br>24.13)          | (0.17,<br>0.58)            | <0.001 | (0.13,<br>0.78)         | (0.22,<br>0.64)         | (0.08,<br>0.73)            |
|                               | 10.22                      | 10.24                    | 0.01                       |        |                   |                 |                   |        | 16.68                      | 17.02                      | 0.22                       |        | 0.28                    | 0.28                    | 0.13                       |
| Thailand                      | (9.83,<br>10.62)           | (9.84,<br>10.66)         | (-0.00,<br>0.02)           | 0.193  | —                 | —               | —                 | —      | (16.18,<br>17.20)          | (16.51,<br>17.54)          | (-0.62,<br>1.07)           | 0.606  | (0.22,<br>0.35)         | (0.22,<br>0.36)         | (-1.02,<br>1.28)           |
|                               | 10.32                      | 10.21                    | -0.04                      |        |                   |                 |                   |        | 19.74                      | 31.89                      | 1.84                       |        | 0.33                    | 0.53                    | 1.87                       |
| Timor-Leste                   | (7.07,<br>14.66)           | (7.59,<br>13.56)         | (-0.05,<br>-0.03)          | <0.001 | —                 | —               | —                 | —      | (15.00,<br>25.59)          | (26.93,<br>37.59)          | (1.07,<br>2.62)            | <0.001 | (0.01,<br>2.06)         | (0.08,<br>1.91)         | (1.10,<br>2.64)            |
|                               | 9.97                       | 9.99                     | 0.01                       |        |                   |                 |                   |        | 75.40                      | 62.10                      | -0.67                      |        | 1.25                    | 1.02                    | -0.71                      |
| Togo                          | (8.30,<br>11.90)           | (8.91,<br>11.17)         | (0.00,<br>0.01)            | 0.003  | —                 | —               | —                 | —      | (70.68,<br>80.38)          | (59.37,<br>64.94)          | (-0.84,<br>-0.50)          | <0.001 | (0.71,<br>2.08)         | (0.70,<br>1.45)         | (-0.89,<br>-0.52)          |
| Tokelau                       | 10.93                      | 11.01                    | 0.03                       | 0.071  | —                 | —               | —                 | —      | 65.30                      | 69.97                      | 0.24                       | 0.001  | 1.12                    | 1.18                    | 0.17                       |

|                      |                |                |                |        |              |              |                |                  |                  |                |        |                |                |                |
|----------------------|----------------|----------------|----------------|--------|--------------|--------------|----------------|------------------|------------------|----------------|--------|----------------|----------------|----------------|
|                      | (0.00, 840.33) | (0.00, 908.07) | (-0.00, 0.06)  |        |              |              |                | (0.00, 936.97)   | (0.00, 1019.78)  | (0.09, 0.38)   |        | (0.00, 822.93) | (0.00, 889.58) | (-0.02, 0.37)  |
|                      | 10.86          | 10.80          | -0.02          |        |              |              |                | 25.83            | 30.39            | 0.58           |        | 0.43           | 0.50           | 0.53           |
| Tonga                | (2.72, 31.81)  | (2.97, 28.39)  | (-0.03, -0.01) | <0.001 | —            | —            | —              | (11.05, 52.94)   | (15.17, 54.90)   | (0.45, 0.70)   | <0.001 | (0.00, 16.33)  | (0.00, 12.31)  | (0.26, 0.80)   |
|                      | 9.24           | 9.25           | 0.00           |        |              |              |                | 105.48           | 98.19            | -0.19          |        | 1.77           | 1.66           | -0.17          |
| Trinidad and Tobago  | (6.76, 12.37)  | (6.80, 12.37)  | (0.00, 0.00)*  | <0.001 | —            | —            | —              | (96.59, 115.00)  | (89.93, 107.07)  | (-0.50, 0.13)  | 0.240  | (0.79, 3.44)   | (0.76, 3.26)   | (-0.49, 0.16)  |
|                      | 8.73           | 8.71           | -0.01          |        |              |              |                | 29.17            | 23.10            | -0.80          |        | 0.46           | 0.36           | -0.79          |
| Tunisia              | (7.75, 9.81)   | (7.86, 9.63)   | (-0.02, -0.01) | <0.001 | —            | —            | —              | (27.36, 31.09)   | (21.71, 24.57)   | (-0.91, -0.70) | <0.001 | (0.26, 0.78)   | (0.21, 0.60)   | (-1.01, -0.57) |
|                      | 8.75           | 8.78           | 0.02           |        | 1.09         |              |                | 52.11            | 22.83            | -2.83          |        | 0.81           | 0.34           | -3.00          |
| Turkey               | (8.38, 9.14)   | (8.47, 9.10)   | (-0.00, 0.04)  | 0.072  | (0.96, 1.24) | —            | —              | (51.20, 53.02)   | (22.32, 23.35)   | (-3.27, -2.39) | <0.001 | (0.70, 0.94)   | (0.28, 0.41)   | (-3.36, -2.64) |
|                      | 11.51          | 11.72          | 0.06           |        |              |              |                | 469.52           | 536.33           | 0.56           |        | 8.01           | 9.06           | 0.53           |
| Turkmenistan         | (9.84, 13.39)  | (10.28, 13.31) | (0.05, 0.07)   | <0.001 | —            | —            | —              | (458.32, 480.94) | (526.37, 546.43) | (0.20, 0.92)   | 0.003  | (6.60, 9.66)   | (7.81, 10.47)  | (0.17, 0.89)   |
|                      | 10.72          | 11.07          | 0.11           |        |              |              |                | 71.50            | 89.63            | 0.78           |        | 1.22           | 1.52           | 0.76           |
| Tuvalu               | (0.00, 129.23) | (0.01, 109.74) | (0.10, 0.12)   | <0.001 | —            | —            | —              | (12.10, 230.17)  | (24.96, 232.09)  | (0.70, 0.86)   | <0.001 | (0.00, 111.05) | (0.00, 92.60)  | (0.68, 0.83)   |
|                      | 10.02          | 10.00          | -0.01          |        |              |              |                | 39.89            | 46.51            | 0.46           |        | 0.69           | 0.80           | 0.43           |
| Uganda               | (9.21, 10.88)  | (9.49, 10.53)  | (-0.01, -0.00) | 0.002  | —            | —            | —              | (38.18, 41.67)   | (45.36, 47.68)   | (0.16, 0.76)   | 0.003  | (0.48, 0.97)   | (0.65, 0.97)   | (0.05, 0.81)   |
|                      | 13.57          | 13.63          | 0.01           |        | 2.22         | 2.12         | -0.28          | 345.53           | 705.37           | 2.43           |        | 6.13           | 12.56          | 2.44           |
| Ukraine              | (13.05, 14.11) | (13.01, 14.27) | (0.01, 0.02)   | <0.001 | (2.03, 2.43) | (1.92, 2.34) | (-0.38, -0.18) | (342.99, 348.09) | (701.38, 709.38) | (0.68, 4.21)   | 0.006  | (5.80, 6.48)   | (12.04, 13.11) | (0.67, 4.25)   |
|                      | 9.26           | 9.16           | -0.04          |        |              |              |                | 39.75            | 31.31            | -0.86          |        | 0.64           | 0.50           | -0.86          |
| United Arab Emirates | (7.37, 11.58)  | (8.03, 10.44)  | (-0.06, -0.03) | <0.001 | —            | —            | —              | (35.67, 44.24)   | (29.21, 33.56)   | (-1.10, -0.62) | <0.001 | (0.23, 1.57)   | (0.28, 0.89)   | (-1.07, -0.65) |
|                      | 13.26          | 12.70          | -0.16          |        |              | 1.27         |                | 57.65            | 47.80            | -0.64          |        | 0.92           | 0.76           | -0.63          |
| United Kingdom       | (12.77, 13.77) | (12.23, 13.18) | (-0.21, -0.12) | <0.001 | —            | (1.13, 1.43) | —              | (56.62, 58.69)   | (46.89, 48.71)   | (-0.84, -0.44) | <0.001 | (0.79, 1.06)   | (0.65, 0.89)   | (-0.84, -0.43) |
| United Republic of   | 9.97           | 9.98           | 0.00           | 0.061  | —            | —            | —              | 51.55            | 45.21            | -0.50          | <0.001 | 0.89           | 0.77           | -0.53          |

|                                          |                         |                         |                            |        |                   |                     |                   |                   |                            |                            |                            |                 |                         |                         |                            |        |
|------------------------------------------|-------------------------|-------------------------|----------------------------|--------|-------------------|---------------------|-------------------|-------------------|----------------------------|----------------------------|----------------------------|-----------------|-------------------------|-------------------------|----------------------------|--------|
| Tanzania                                 | (9.32,<br>10.66)        | (9.56,<br>10.42)        | (0.00,<br>0.01)            |        |                   |                     |                   | (50.00,<br>53.14) | (44.28,<br>46.16)          | (-0.63,<br>-0.37)          |                            | (0.69,<br>1.13) | (0.65,<br>0.91)         | (-0.67,<br>-0.39)       |                            |        |
|                                          | 14.07                   | 14.02                   | -0.01                      |        | 96.77             | 108.25              | 0.44              | 116.10            | 92.94                      | -0.77                      |                            | 1.78            | 1.36                    | -0.94                   |                            |        |
| United States of<br>America              | (13.84,<br>14.30)       | (13.80,<br>14.25)       | (-0.06,<br>0.05)           | 0.859  | (96.18,<br>97.37) | (107.65,<br>108.86) | (0.21,<br>0.66)   | <0.001            | (115.45,<br>116.75)        | (92.37,<br>93.50)          | (-0.98,<br>-0.57)          | <0.001          | (1.70,<br>1.86)         | (1.30,<br>1.43)         | (-1.18,<br>-0.71)          | <0.001 |
|                                          | 9.14                    | 9.16                    | 0.01                       |        |                   |                     |                   |                   | 142.58                     | 83.13                      | -1.89                      |                 | 2.42                    | 1.42                    | -1.86                      |        |
| United States<br>Virgin Islands          | (2.26,<br>25.07)        | (1.74,<br>28.43)        | (0.00,<br>0.01)            | 0.006  | —                 | —                   | —                 | —                 | (107.78,<br>185.37)        | (54.36,<br>122.27)         | (-2.50,<br>-1.27)          | <0.001          | (0.05,<br>14.62)        | (0.00,<br>15.82)        | (-2.50,<br>-1.21)          | <0.001 |
|                                          | 10.34                   | 10.33                   | -0.00                      |        | 5.04              | 2.16                | -2.89             |                   | 76.74                      | 42.47                      | -2.04                      |                 | 1.26                    | 0.68                    | -2.11                      |        |
| Uruguay                                  | (8.55,<br>12.39)        | (8.60,<br>12.31)        | (-0.01,<br>0.00)           | 0.313  | (3.82,<br>6.53)   | (1.41,<br>3.18)     | (-4.05,<br>-1.73) | <0.001            | (71.71,<br>82.02)          | (38.89,<br>46.29)          | (-2.45,<br>-1.62)          | <0.001          | (0.69,<br>2.11)         | (0.30,<br>1.34)         | (-2.53,<br>-1.70)          | <0.001 |
|                                          | 11.53                   | 11.55                   | 0.01                       |        |                   |                     |                   |                   | 20.57                      | 51.11                      | 3.16                       |                 | 0.35                    | 0.86                    | 3.18                       |        |
| Uzbekistan                               | (10.81,<br>12.28)       | (11.00,<br>12.13)       | (0.00,<br>0.01)            | 0.060  | —                 | —                   | —                 | —                 | (19.59,<br>21.59)          | (49.94,<br>52.29)          | (2.56,<br>3.76)            | <0.001          | (0.23,<br>0.51)         | (0.72,<br>1.03)         | (2.64,<br>3.73)            | <0.001 |
|                                          | 10.84                   | 10.82                   | -0.01                      |        |                   |                     |                   |                   | 59.58                      | 87.11                      | 1.28                       |                 | 1.02                    | 1.48                    | 1.25                       |        |
| Vanuatu                                  | (4.05,<br>24.09)        | (5.69,<br>18.93)        | (-0.01,<br>-0.00)          | 0.034  | —                 | —                   | —                 | —                 | (40.77,<br>84.45)          | (70.68,<br>106.36)         | (1.09,<br>1.47)            | <0.001          | (0.00,<br>9.72)         | (0.13,<br>6.31)         | (1.03,<br>1.48)            | <0.001 |
| Venezuela<br>(Bolivarian<br>Republic of) | 9.21<br>(8.55,<br>9.92) | 9.18<br>(8.62,<br>9.78) | -0.01<br>(-0.02,<br>-0.01) | <0.001 | —                 | —                   | —                 | —                 | 38.13<br>(36.76,<br>39.54) | 23.48<br>(22.57,<br>24.42) | -1.57<br>(-2.26,<br>-0.88) | <0.001          | 0.64<br>(0.47,<br>0.85) | 0.39<br>(0.28,<br>0.52) | -1.62<br>(-2.33,<br>-0.90) | <0.001 |
|                                          | 10.14                   | 10.29                   | 0.05                       |        |                   |                     |                   |                   | 36.06                      | 34.83                      | -0.12                      |                 | 0.61                    | 0.58                    | -0.17                      |        |
| Viet Nam                                 | (9.77,<br>10.53)        | (9.97,<br>10.61)        | (0.04,<br>0.05)            | <0.001 | —                 | —                   | —                 | —                 | (35.33,<br>36.80)          | (34.26,<br>35.40)          | (-0.21,<br>-0.02)          | 0.014           | (0.52,<br>0.72)         | (0.51,<br>0.66)         | (-0.33,<br>-0.01)          | 0.036  |
|                                          | 8.70                    | 8.73                    | 0.01                       |        |                   |                     |                   |                   | 24.93                      | 24.68                      | 0.02                       |                 | 0.41                    | 0.40                    | 0.02                       |        |
| Yemen                                    | (7.85,<br>9.62)         | (8.22,<br>9.26)         | (0.00,<br>0.02)            | 0.006  | —                 | —                   | —                 | —                 | (23.45,<br>26.48)          | (23.83,<br>25.57)          | (-0.30,<br>0.34)           | 0.917           | (0.24,<br>0.67)         | (0.30,<br>0.53)         | (-0.25,<br>0.30)           | 0.861  |
|                                          | 10.01                   | 10.03                   | 0.01                       |        |                   |                     |                   |                   | 36.28                      | 47.18                      | 0.90                       |                 | 0.62                    | 0.81                    | 0.90                       |        |
| Zambia                                   | (8.84,<br>11.31)        | (9.31,<br>10.79)        | (0.01,<br>0.01)            | <0.001 | —                 | —                   | —                 | —                 | (33.90,<br>38.79)          | (45.54,<br>48.86)          | (0.77,<br>1.02)            | <0.001          | (0.34,<br>1.05)         | (0.61,<br>1.07)         | (0.74,<br>1.06)            | <0.001 |
|                                          | 9.99                    | 9.98                    | -0.00                      |        |                   |                     |                   |                   | 50.49                      | 74.48                      | 1.34                       |                 | 0.82                    | 1.20                    | 1.33                       |        |
| Zimbabwe                                 | (8.98,<br>11.09)        | (9.19,<br>10.82)        | (-0.01,<br>-0.00)          | 0.002  | —                 | —                   | —                 | —                 | (48.23,<br>52.84)          | (72.34,<br>76.67)          | (0.58,<br>2.11)            | 0.001           | (0.55,<br>1.19)         | (0.94,<br>1.52)         | (0.60,<br>2.06)            | <0.001 |

**Women**

|                     |        |        |         |        |   |   |   |   |         |         |         |        |        |        |         |        |
|---------------------|--------|--------|---------|--------|---|---|---|---|---------|---------|---------|--------|--------|--------|---------|--------|
|                     | 6.97   | 6.97   | 0.00    |        |   |   |   |   | 36.52   | 24.47   | -1.37   |        | 0.61   | 0.41   | -1.39   |        |
| Afghanistan         | (5.76, | (6.33, | (0.00,  | 0.008  | — | — | — | — | (33.68, | (23.26, | (-1.55, | <0.001 | (0.29, | (0.26, | (-1.61, | <0.001 |
|                     | 8.38)  | 7.65)  | 0.00)*  |        |   |   |   |   | 39.56)  | 25.74)  | -1.18)  |        | 1.17)  | 0.61)  | -1.17)  |        |
|                     | 7.62   | 7.62   | 0.00    |        |   |   |   |   | 52.27   | 23.77   | -2.73   |        | 0.86   | 0.39   | -2.76   |        |
| Albania             | (5.69, | (5.32, | (0.00,  | <0.001 | — | — | — | — | (46.95, | (19.55, | (-3.05, | <0.001 | (0.31, | (0.04, | (-3.12, | <0.001 |
|                     | 10.04) | 10.61) | 0.00)*  |        |   |   |   |   | 58.06)  | 28.66)  | -2.40)  |        | 1.97)  | 1.54)  | -2.39)  |        |
|                     | 6.97   | 6.97   | 0.00    |        |   |   |   |   | 27.44   | 15.92   | -1.86   |        | 0.45   | 0.26   | -1.84   |        |
| Algeria             | (6.22, | (6.42, | (0.00,  | <0.001 | — | — | — | — | (25.94, | (15.08, | (-1.97, | <0.001 | (0.27, | (0.16, | (-2.02, | <0.001 |
|                     | 7.78)  | 7.55)  | 0.00)*  |        |   |   |   |   | 29.00)  | 16.79)  | -1.75)  |        | 0.70)  | 0.39)  | -1.65)  |        |
|                     | 8.12   | 8.12   | 0.00    |        |   |   |   |   | 109.60  | 82.98   | -0.92   |        | 1.88   | 1.42   | -1.09   |        |
| American Samoa      | (0.09, | (0.10, | (0.00,  | <0.001 | — | — | — | — | (52.62, | (35.70, | (-1.47, | 0.001  | (0.00, | (0.00, | (-1.58, | <0.001 |
|                     | 61.50) | 59.55) | 0.00)*  |        |   |   |   |   | 204.88) | 167.38) | -0.35)  |        | 51.23) | 48.28) | -0.60)  |        |
|                     | 7.43   | 7.43   | 0.00    |        |   |   |   |   | 28.37   | 18.95   | -1.36   |        | 0.44   | 0.30   | -1.31   |        |
| Andorra             | (0.11, | (0.13, | (0.00,  | <0.001 | — | — | — | — | (6.43,  | (2.90,  | (-1.50, | <0.001 | (0.00, | (0.00, | (-1.57, | <0.001 |
|                     | 55.01) | 51.95) | 0.00)*  |        |   |   |   |   | 86.23)  | 69.32)  | -1.22)  |        | 43.51) | 40.09) | -1.05)  |        |
|                     | 8.50   | 8.50   | 0.00    |        |   |   |   |   | 61.59   | 54.35   | -0.42   |        | 1.04   | 0.91   | -0.45   |        |
| Angola              | (7.22, | (7.75, | (-0.00, | 1.000  | — | — | — | — | (58.01, | (52.40, | (-1.02, | 0.171  | (0.62, | (0.67, | (-1.06, | 0.152  |
|                     | 9.95)  | 9.31)  | 0.00)   |        |   |   |   |   | 65.34)  | 56.35)  | 0.18)   |        | 1.65)  | 1.22)  | 0.17)   |        |
|                     | 7.67   | 7.67   | 0.00    |        |   |   |   |   | 36.78   | 26.99   | -1.09   |        | 0.61   | 0.44   | -1.21   |        |
| Antigua and Barbuda | (0.20, | (0.44, | (0.00,  | <0.001 | — | — | — | — | (11.62, | (8.49,  | (-1.30, | <0.001 | (0.00, | (0.00, | (-1.96, | 0.002  |
|                     | 44.96) | 37.32) | 0.00)*  |        |   |   |   |   | 88.83)  | 65.91)  | -0.88)  |        | 32.45) | 24.93) | -0.46)  |        |
|                     | 6.27   | 6.27   | 0.00    |        |   |   |   |   | 52.99   | 33.84   | -1.52   |        | 0.87   | 0.55   | -1.58   |        |
| Argentina           | (5.66, | (5.76, | (0.00,  | 0.004  | — | — | — | — | (51.18, | (32.64, | (-1.90, | <0.001 | (0.65, | (0.41, | (-1.93, | <0.001 |
|                     | 6.93)  | 6.82)  | 0.00)*  |        |   |   |   |   | 54.85)  | 35.07)  | -1.15)  |        | 1.14)  | 0.73)  | -1.23)  |        |
|                     | 8.83   | 8.83   | 0.00    |        |   |   |   |   | 43.16   | 14.50   | -3.77   |        | 0.73   | 0.24   | -3.81   |        |
| Armenia             | (6.80, | (6.50, | (0.00,  | <0.001 | — | — | — | — | (38.56, | (11.58, | (-5.51, | <0.001 | (0.25, | (0.02, | (-5.90, | 0.001  |
|                     | 11.31) | 11.86) | 0.00)*  |        |   |   |   |   | 48.19)  | 18.08)  | -1.99)  |        | 1.70)  | 1.39)  | -1.68)  |        |
|                     | 7.13   | 7.13   | 0.00    |        |   |   |   |   | 48.11   | 21.08   | -2.83   |        | 0.75   | 0.32   | -2.94   |        |
| Australia           | (6.26, | (6.34, | (0.00,  | <0.001 | — | — | — | — | (45.81, | (19.73, | (-3.33, | <0.001 | (0.49, | (0.18, | (-3.63, | <0.001 |
|                     | 8.09)  | 7.99)  | 0.00)*  |        |   |   |   |   | 50.51)  | 22.52)  | -2.33)  |        | 1.11)  | 0.56)  | -2.25)  |        |
|                     | 9.29   | 9.60   | 0.10    |        |   |   |   |   | 45.78   | 10.37   | -4.99   |        | 0.74   | 0.15   | -5.38   |        |
| Austria             | (7.80, | (8.02, | (0.05,  | <0.001 | — | — | — | — | (42.40, | (8.74,  | (-5.38, | <0.001 | (0.37, | (0.02, | (-6.00, | <0.001 |
|                     | 11.01) | 11.43) | 0.16)   |        |   |   |   |   | 49.39)  | 12.25)  | -4.60)  |        | 1.36)  | 0.60)  | -4.76)  |        |

|            |        |        |         |        |   |   |   |   |          |          |         |        |        |        |         |        |
|------------|--------|--------|---------|--------|---|---|---|---|----------|----------|---------|--------|--------|--------|---------|--------|
|            | 8.83   | 8.83   | 0.00    |        |   |   |   |   | 182.32   | 146.09   | -0.77   |        | 3.07   | 2.45   | -0.76   |        |
| Azerbaijan | (7.42, | (7.60, | (0.00,  | <0.001 | — | — | — | — | (175.68, | (141.00, | (-1.32, | 0.007  | (2.26, | (1.83, | (-1.58, | 0.073  |
|            | 10.45) | 10.24) | 0.00)*  |        |   |   |   |   | 189.16)  | 151.35)  | -0.21)  |        | 4.10)  | 3.23)  | 0.07)   |        |
|            | 7.67   | 7.67   | 0.00    |        |   |   |   |   | 79.18    | 72.84    | -0.44   |        | 1.34   | 1.23   | -0.48   |        |
| Bahamas    | (2.30, | (2.78, | (0.00,  | <0.001 | — | — | — | — | (57.89,  | (55.09,  | (-0.72, | 0.002  | (0.01, | (0.03, | (-0.75, | 0.001  |
|            | 19.40) | 17.04) | 0.00)*  |        |   |   |   |   | 106.15)  | 94.65)   | -0.16)  |        | 9.92)  | 7.46)  | -0.21)  |        |
|            | 6.97   | 6.97   | 0.00    |        |   |   |   |   | 48.52    | 25.35    | -2.23   |        | 0.75   | 0.39   | -2.23   |        |
| Bahrain    | (2.76, | (3.99, | (0.00,  | <0.001 | — | — | — | — | (35.55,  | (19.20,  | (-2.82, | <0.001 | (0.01, | (0.01, | (-2.99, | <0.001 |
|            | 14.94) | 11.48) | 0.00)*  |        |   |   |   |   | 64.96)   | 32.98)   | -1.63)  |        | 5.98)  | 2.68)  | -1.46)  |        |
|            | 8.50   | 8.50   |         |        |   |   |   |   | 10.36    | 7.31     | -1.13   |        | 0.17   | 0.12   | -1.14   |        |
| Bangladesh | (8.09, | (8.20, | —       | —      | — | — | — | — | (9.91,   | (7.03,   | (-1.65, | <0.001 | (0.12, | (0.09, | (-1.84, | 0.001  |
|            | 8.92)  | 8.81)  |         |        |   |   |   |   | 10.84)   | 7.61)    | -0.61)  |        | 0.25)  | 0.16)  | -0.44)  |        |
|            | 7.67   | 7.67   | 0.00    |        |   |   |   |   | 41.79    | 36.24    | -0.45   |        | 0.68   | 0.60   | -0.46   |        |
| Barbados   | (2.20, | (2.03, | (0.00,  | <0.001 | — | — | — | — | (26.54,  | (21.63,  | (-1.15, | 0.219  | (0.00, | (0.00, | (-0.84, | 0.017  |
|            | 19.47) | 20.49) | 0.00)*  |        |   |   |   |   | 62.85)   | 57.38)   | 0.27)   |        | 8.55)  | 9.38)  | -0.08)  |        |
|            | 8.61   | 8.61   | 0.00    |        |   |   |   |   | 96.19    | 113.66   | 0.56    |        | 1.68   | 2.03   | 0.63    |        |
| Belarus    | (7.37, | (7.16, | (0.00,  | 1.000  | — | — | — | — | (92.03,  | (108.81, | (-0.46, | 0.283  | (1.18, | (1.43, | (-0.36, | 0.212  |
|            | 10.02) | 10.32) | 0.00)   |        |   |   |   |   | 100.50)  | 118.72)  | 1.58)   |        | 2.35)  | 2.86)  | 1.63)   |        |
|            | 6.38   | 6.38   | 0.00    |        |   |   |   |   | 20.02    | 9.15     | -2.68   |        | 0.30   | 0.13   | -2.87   |        |
| Belgium    | (5.28, | (5.25, | (0.00,  | <0.001 | — | — | — | — | (18.02,  | (7.79,   | (-2.98, | <0.001 | (0.11, | (0.02, | (-3.24, | <0.001 |
|            | 7.67)  | 7.70)  | 0.00)*  |        |   |   |   |   | 22.20)   | 10.70)   | -2.37)  |        | 0.70)  | 0.47)  | -2.49)  |        |
|            | 7.67   | 7.67   | 0.00    |        |   |   |   |   | 48.74    | 58.98    | 0.58    |        | 0.81   | 0.98   | 0.56    |        |
| Belize     | (1.30, | (3.04, | (-0.00, | 1.000  | — | — | — | — | (27.70,  | (44.02,  | (-0.22, | 0.155  | (0.00, | (0.01, | (-0.22, | 0.159  |
|            | 27.08) | 16.18) | 0.00)   |        |   |   |   |   | 81.15)   | 77.52)   | 1.38)   |        | 16.60) | 6.39)  | 1.35)   |        |
|            | 8.50   | 8.50   | 0.00    |        |   |   |   |   | 51.79    | 37.88    | -1.05   |        | 0.88   | 0.64   | -1.11   |        |
| Benin      | (6.69, | (7.37, | (0.00,  | 1.000  | — | — | — | — | (47.09,  | (35.40,  | (-1.30, | <0.001 | (0.37, | (0.35, | (-1.26, | <0.001 |
|            | 10.68) | 9.77)  | 0.00)   |        |   |   |   |   | 56.86)   | 40.49)   | -0.80)  |        | 1.83)  | 1.08)  | -0.96)  |        |
|            | 7.67   | 7.67   | 0.00    |        |   |   |   |   | 34.16    | 18.81    | -2.19   |        | 0.55   | 0.29   | -2.32   |        |
| Bermuda    | (0.19, | (0.05, | (0.00,  | 1.000  | — | — | — | — | (10.18,  | (1.84,   | (-2.52, | <0.001 | (0.00, | (0.00, | (-2.74, | <0.001 |
|            | 53.15) | 65.46) | 0.00)   |        |   |   |   |   | 91.09)   | 82.55)   | -1.86)  |        | 41.94) | 53.11) | -1.91)  |        |
|            | 8.50   | 8.50   | 0.00    |        |   |   |   |   | 5.44     | 4.86     | -0.38   |        | 0.09   | 0.08   | -0.36   |        |
| Bhutan     | (3.95, | (4.65, | (0.00,  | 0.180  | — | — | — | — | (1.90,   | (2.10,   | (-0.66, | 0.008  | (0.00, | (0.00, | (-1.00, | 0.280  |
|            | 16.49) | 14.31) | 0.00)   |        |   |   |   |   | 12.63)   | 9.64)    | -0.10)  |        | 4.60)  | 2.53)  | 0.29)   |        |



|                   |        |        |         |        |   |   |   |         |         |         |        |        |        |         |        |
|-------------------|--------|--------|---------|--------|---|---|---|---------|---------|---------|--------|--------|--------|---------|--------|
| Bolivia           | 7.54   | 7.54   | 0.00    |        |   |   |   | 26.92   | 18.02   | -1.37   |        | 0.44   | 0.30   | -1.34   |        |
| (Plurinational    | (6.07, | (6.48, | (0.00,  | 0.005  | — | — | — | (24.08, | (16.35, | (-1.47, | <0.001 | (0.15, | (0.12, | (-1.44, | <0.001 |
| State of)         | 9.28)  | 8.73)  | 0.00)*  |        |   |   |   | 30.02)  | 19.81)  | -1.27)  |        | 1.04)  | 0.61)  | -1.24)  |        |
| Bosnia and        | 7.62   | 7.62   | 0.00    |        |   |   |   | 34.40   | 32.83   | -0.13   |        | 0.56   | 0.54   | -0.08   |        |
| Herzegovina       | (5.95, | (5.42, | (0.00,  | 1.000  | — | — | — | (30.74, | (28.11, | (-0.67, | 0.655  | (0.19, | (0.11, | (-0.54, | 0.737  |
|                   | 9.62)  | 10.47) | 0.00)   |        |   |   |   | 38.38)  | 38.18)  | 0.43)   |        | 1.31)  | 1.74)  | 0.39)   |        |
|                   | 8.50   | 8.50   | 0.00    |        |   |   |   | 52.94   | 44.90   | -0.56   |        | 0.89   | 0.74   | -0.61   |        |
| Botswana          | (5.31, | (6.21, | (0.00,  | <0.001 | — | — | — | (44.28, | (39.39, | (-0.77, | <0.001 | (0.12, | (0.20, | (-0.89, | <0.001 |
|                   | 13.09) | 11.38) | 0.00)*  |        |   |   |   | 62.94)  | 50.98)  | -0.34)  |        | 3.33)  | 1.95)  | -0.32)  |        |
|                   | 8.60   | 8.60   | 0.00    |        |   |   |   | 74.94   | 44.93   | -1.76   |        | 1.28   | 0.75   | -1.84   |        |
| Brazil            | (8.28, | (8.33, | (0.00,  | <0.001 | — | — | — | (73.97, | (44.31, | (-1.97, | <0.001 | (1.15, | (0.67, | (-2.05, | <0.001 |
|                   | 8.94)  | 8.88)  | 0.00)*  |        |   |   |   | 75.93)  | 45.55)  | -1.54)  |        | 1.41)  | 0.84)  | -1.62)  |        |
|                   | 8.60   | 8.60   | 0.00    |        |   |   |   | 111.61  | 87.61   | -0.82   |        | 1.82   | 1.42   | -0.85   |        |
| Brunei Darussalam | (2.74, | (3.72, | (0.00,  | <0.001 | — | — | — | (85.82, | (69.67, | (-1.01, | <0.001 | (0.05, | (0.08, | (-1.06, | <0.001 |
|                   | 20.75) | 17.34) | 0.00)*  |        |   |   |   | 143.02) | 109.04) | -0.63)  |        | 10.60) | 7.14)  | -0.64)  |        |
|                   | 7.62   | 7.62   | 0.00    |        |   |   |   | 23.50   | 42.87   | 2.22    |        | 0.38   | 0.70   | 2.26    |        |
| Bulgaria          | (6.28, | (5.95, | (-0.00, | 1.000  | — | — | — | (21.09, | (38.73, | (1.53,  | <0.001 | (0.14, | (0.27, | (1.61,  | <0.001 |
|                   | 9.17)  | 9.67)  | 0.00)   |        |   |   |   | 26.12)  | 47.36)  | 2.92)   |        | 0.86)  | 1.55)  | 2.92)   |        |
|                   | 8.50   | 8.50   | 0.00    |        |   |   |   | 55.32   | 37.33   | -1.32   |        | 0.95   | 0.63   | -1.39   |        |
| Burkina Faso      | (7.15, | (7.65, | (0.00,  | 1.000  | — | — | — | (51.68, | (35.49, | (-1.52, | <0.001 | (0.53, | (0.41, | (-1.69, | <0.001 |
|                   | 10.05) | 9.42)  | 0.00)   |        |   |   |   | 59.15)  | 39.25)  | -1.13)  |        | 1.60)  | 0.93)  | -1.09)  |        |
|                   | 8.50   | 8.50   | 0.00    |        |   |   |   | 32.17   | 21.53   | -1.38   |        | 0.55   | 0.36   | -1.47   |        |
| Burundi           | (6.81, | (7.33, | (0.00,  | <0.001 | — | — | — | (28.68, | (19.60, | (-1.57, | <0.001 | (0.18, | (0.15, | (-1.66, | <0.001 |
|                   | 10.52) | 9.81)  | 0.00)*  |        |   |   |   | 35.99)  | 23.61)  | -1.19)  |        | 1.31)  | 0.75)  | -1.28)  |        |
|                   | 8.50   | 8.50   | 0.00    |        |   |   |   | 26.64   | 17.66   | -1.38   |        | 0.44   | 0.29   | -1.40   |        |
| Cabo Verde        | (2.90, | (4.10, | (0.00,  | <0.001 | — | — | — | (15.32, | (10.96, | (-1.77, | <0.001 | (0.00, | (0.00, | (-1.85, | <0.001 |
|                   | 20.68) | 15.68) | 0.00)*  |        |   |   |   | 44.05)  | 27.04)  | -0.99)  |        | 9.03)  | 3.89)  | -0.95)  |        |
|                   | 7.48   | 7.48   | 0.00    |        |   |   |   | 22.36   | 19.23   | -0.51   |        | 0.38   | 0.33   | -0.50   |        |
| Cambodia          | (6.33, | (6.60, | (0.00,  | <0.001 | — | — | — | (20.29, | (17.81, | (-0.64, | <0.001 | (0.16, | (0.17, | (-0.59, | <0.001 |
|                   | 8.79)  | 8.44)  | 0.00)*  |        |   |   |   | 24.60)  | 20.73)  | -0.38)  |        | 0.79)  | 0.58)  | -0.41)  |        |
|                   | 8.50   | 8.50   | 0.00    |        |   |   |   | 61.45   | 42.13   | -1.29   |        | 1.05   | 0.72   | -1.29   |        |
| Cameroon          | (7.23, | (7.77, | (0.00,  | <0.001 | — | — | — | (57.84, | (40.46, | (-1.43, | <0.001 | (0.63, | (0.51, | (-1.50, | <0.001 |
|                   | 9.95)  | 9.28)  | 0.00)*  |        |   |   |   | 65.23)  | 43.85)  | -1.16)  |        | 1.68)  | 0.98)  | -1.09)  |        |

|                          |         |         |         |        |          |         |         |        |         |         |         |        |         |         |         |        |
|--------------------------|---------|---------|---------|--------|----------|---------|---------|--------|---------|---------|---------|--------|---------|---------|---------|--------|
|                          | 8.36    | 8.36    | 0.00    |        | 107.78   | 51.67   | -2.55   |        | 36.09   | 28.67   | -0.79   |        | 0.39    | 0.34    | -0.47   |        |
| Canada                   | (7.62,  | (7.63,  | (0.00,  | 0.101  | (105.13, | (49.88, | (-3.03, | <0.001 | (34.53, | (27.31, | (-0.98, | <0.001 | (0.25,  | (0.21,  | (-0.86, | 0.020  |
|                          | 9.16)   | 9.15)   | 0.00)   |        | 110.49)  | 53.51)  | -2.07)  |        | 37.70)  | 30.09)  | -0.60)  |        | 0.60)   | 0.53)   | -0.07)  |        |
| Central African Republic | 8.50    | 8.50    | 0.00    |        |          |         |         |        | 61.43   | 55.48   | -0.42   |        | 1.05    | 0.94    | -0.36   |        |
|                          | (6.15,  | (6.82,  | (0.00,  | <0.001 | —        | —       | —       | —      | (54.60, | (50.97, | (-0.76, | 0.016  | (0.33,  | (0.43,  | (-0.51, | <0.001 |
|                          | 11.54)  | 10.50)  | 0.00)*  |        |          |         |         |        | 68.95)  | 60.31)  | -0.08)  |        | 2.57)   | 1.80)   | -0.20)  |        |
| Chad                     | 8.50    | 8.50    | 0.00    |        |          |         |         |        | 55.02   | 36.89   | -1.30   |        | 0.94    | 0.62    | -1.41   |        |
|                          | (6.83,  | (7.45,  | (0.00,  | <0.001 | —        | —       | —       | —      | (50.52, | (34.60, | (-1.69, | <0.001 | (0.44,  | (0.36,  | (-1.66, | <0.001 |
|                          | 10.47)  | 9.67)   | 0.00)*  |        |          |         |         |        | 59.83)  | 39.30)  | -0.91)  |        | 1.79)   | 1.02)   | -1.17)  |        |
|                          | 6.27    | 6.27    | -0.00   |        |          |         |         |        | 24.06   | 19.28   | -0.77   |        | 0.38    | 0.30    | -0.88   |        |
| Chile                    | (5.39,  | (5.46,  | (-0.02, | 0.927  | —        | —       | —       | —      | (22.29, | (17.83, | (-1.10, | <0.001 | (0.19,  | (0.14,  | (-1.18, | <0.001 |
|                          | 7.27)   | 7.18)   | 0.01)   |        |          |         |         |        | 25.94)  | 20.83)  | -0.44)  |        | 0.69)   | 0.56)   | -0.57)  |        |
|                          | 9.53    | 8.45    | -0.43   |        |          |         |         |        | 21.52   | 15.76   | -1.15   |        | 0.34    | 0.25    | -1.18   |        |
| China                    | (9.41,  | (8.33,  | (-0.45, | <0.001 | —        | —       | —       | —      | (21.34, | (15.59, | (-1.74, | <0.001 | (0.32,  | (0.23,  | (-1.82, | <0.001 |
|                          | 9.65)   | 8.57)   | -0.40)* |        |          |         |         |        | 21.70)  | 15.92)  | -0.56)  |        | 0.37)   | 0.27)   | -0.53)  |        |
|                          | 7.67    | 7.67    | 0.00    |        |          |         |         |        | 18.86   | 14.42   | -0.88   |        | 0.31    | 0.23    | -1.13   |        |
| Colombia                 | (7.03,  | (7.13,  | (0.00,  | 0.079  | —        | —       | —       | —      | (17.85, | (13.67, | (-1.28, | <0.001 | (0.19,  | (0.15,  | (-1.46, | <0.001 |
|                          | 8.35)   | 8.24)   | 0.00)   |        |          |         |         |        | 19.92)  | 15.20)  | -0.47)  |        | 0.48)   | 0.35)   | -0.79)  |        |
|                          | 8.50    | 8.50    | 0.00    |        |          |         |         |        | 24.40   | 21.15   | -0.50   |        | 0.41    | 0.36    | -0.48   |        |
| Comoros                  | (3.38,  | (4.42,  | (-0.00, | 1.000  | —        | —       | —       | —      | (14.56, | (14.22, | (-3.23, | 0.722  | (0.00,  | (0.00,  | (-3.11, | 0.726  |
|                          | 18.36)  | 14.94)  | 0.00)   |        |          |         |         |        | 38.83)  | 30.38)  | 2.30)   |        | 6.73)   | 3.59)   | 2.22)   |        |
|                          | 8.50    | 8.50    | 0.00    |        |          |         |         |        | 60.80   | 52.27   | -0.40   |        | 1.04    | 0.89    | -0.42   |        |
| Congo                    | (6.01,  | (6.85,  | (-0.00, | 1.000  | —        | —       | —       | —      | (53.58, | (48.02, | (-1.06, | 0.235  | (0.30,  | (0.41,  | (-1.10, | 0.225  |
|                          | 11.76)  | 10.44)  | 0.00)   |        |          |         |         |        | 68.78)  | 56.79)  | 0.26)   |        | 2.68)   | 1.66)   | 0.26)   |        |
|                          | 8.12    | 8.12    | 0.00    |        |          |         |         |        | 18.74   | 9.98    | -2.15   |        | 0.31    | 0.16    | -2.23   |        |
| Cook Islands             | (0.00,  | (0.00,  | (0.00,  | 0.003  | —        | —       | —       | —      | (0.10,  | (0.00,  | (-2.39, | <0.001 | (0.00,  | (0.00,  | (-2.78, | <0.001 |
|                          | 135.55) | 139.78) | 0.00)*  |        |          |         |         |        | 154.12) | 143.31) | -1.91)  |        | 121.49) | 124.15) | -1.67)  |        |
|                          | 7.67    | 7.67    | 0.00    |        |          |         |         |        | 44.42   | 31.59   | -1.14   |        | 0.73    | 0.52    | -1.21   |        |
| Costa Rica               | (5.67,  | (6.04,  | (0.00,  | <0.001 | —        | —       | —       | —      | (39.35, | (28.21, | (-1.53, | <0.001 | (0.22,  | (0.17,  | (-2.27, | 0.027  |
|                          | 10.19)  | 9.63)   | 0.00)*  |        |          |         |         |        | 50.00)  | 35.29)  | -0.75)  |        | 1.84)   | 1.23)   | -0.14)  |        |
|                          | 8.50    | 8.50    | 0.00    |        |          |         |         |        | 53.27   | 34.97   | -1.41   |        | 0.90    | 0.59    | -1.45   |        |
| Cote d'Ivoire            | (7.31,  | (7.73,  | (0.00,  | <0.001 | —        | —       | —       | —      | (50.18, | (33.37, | (-1.67, | <0.001 | (0.54,  | (0.40,  | (-1.71, | <0.001 |
|                          | 9.84)   | 9.33)   | 0.00)*  |        |          |         |         |        | 56.52)  | 36.63)  | -1.16)  |        | 1.45)   | 0.84)   | -1.19)  |        |

|                   |        |        |         |        |   |   |   |   |         |         |         |        |        |        |         |        |
|-------------------|--------|--------|---------|--------|---|---|---|---|---------|---------|---------|--------|--------|--------|---------|--------|
|                   | 8.10   | 8.06   | -0.02   |        |   |   |   |   | 21.40   | 9.97    | -2.56   |        | 0.35   | 0.16   | -2.60   |        |
| Croatia           | (6.34, | (5.99, | (-0.03, | 0.002  | — | — | — | — | (18.49, | (7.69,  | (-3.38, | <0.001 | (0.08, | (0.00, | (-3.55, | <0.001 |
|                   | 10.22) | 10.68) | -0.01)  |        |   |   |   |   | 24.67)  | 12.79)  | -1.74)  |        | 1.04)  | 1.04)  | -1.64)  |        |
|                   | 7.67   | 7.67   | 0.00    |        |   |   |   |   | 26.20   | 26.38   | 0.03    |        | 0.43   | 0.43   | -0.02   |        |
| Cuba              | (6.58, | (6.43, | (0.00,  | <0.001 | — | — | — | — | (24.14, | (24.04, | (-0.66, | 0.933  | (0.20, | (0.18, | (-0.67, | 0.946  |
|                   | 8.89)  | 9.09)  | 0.00)*  |        |   |   |   |   | 28.39)  | 28.89)  | 0.72)   |        | 0.80)  | 0.88)  | 0.63)   |        |
|                   | 7.27   | 7.27   | 0.00    |        |   |   |   |   | 29.17   | 13.35   | -2.77   |        | 0.44   | 0.19   | -3.20   |        |
| Cyprus            | (3.62, | (4.24, | (-0.03, | 0.932  | — | — | — | — | (21.11, | (8.87,  | (-3.77, | <0.001 | (0.00, | (0.00, | (-4.24, | <0.001 |
|                   | 13.19) | 12.09) | 0.03)   |        |   |   |   |   | 39.40)  | 19.61)  | -1.77)  |        | 3.57)  | 2.85)  | -2.16)  |        |
|                   | 8.09   | 8.09   | -0.01   |        |   |   |   |   | 38.08   | 25.26   | -1.47   |        | 0.63   | 0.42   | -1.26   |        |
| Czechia           | (6.83, | (6.68, | (-0.01, | <0.001 | — | — | — | — | (35.31, | (22.78, | (-2.39, | 0.002  | (0.32, | (0.16, | (-2.16, | 0.007  |
|                   | 9.51)  | 9.73)  | -0.01)  |        |   |   |   |   | 41.02)  | 27.97)  | -0.55)  |        | 1.12)  | 0.95)  | -0.35)  |        |
| Democratic        | 8.01   | 8.01   | 0.00    |        |   |   |   |   | 29.40   | 32.41   | 0.34    |        | 0.48   | 0.52   | 0.31    |        |
| People's Republic | (7.18, | (7.23, | (0.00,  | <0.001 | — | — | — | — | (27.78, | (30.82, | (0.24,  | <0.001 | (0.29, | (0.34, | (0.21,  | <0.001 |
| of Korea          | 8.92)  | 8.87)  | 0.00)*  |        |   |   |   |   | 31.09)  | 34.08)  | 0.43)   |        | 0.75)  | 0.78)  | 0.41)   |        |
| Democratic        | 8.50   | 8.50   | 0.00    |        |   |   |   |   | 62.15   | 53.98   | -0.53   |        | 1.05   | 0.91   | -0.55   |        |
| Republic of the   | (7.82, | (8.06, | (0.00,  | <0.001 | — | — | — | — | (60.25, | (52.84, | (-0.72, | <0.001 | (0.82, | (0.77, | (-0.75, | <0.001 |
| Congo             | 9.23)  | 8.96)  | 0.00)*  |        |   |   |   |   | 64.10)  | 55.14)  | -0.33)  |        | 1.34)  | 1.07)  | -0.36)  |        |
|                   | 6.65   | 6.65   | 0.00    |        |   |   |   |   | 22.21   | 12.25   | -1.93   |        | 0.36   | 0.20   | -1.92   |        |
| Denmark           | (5.10, | (5.06, | (0.00,  | <0.001 | — | — | — | — | (19.30, | (10.06, | (-3.27, | 0.006  | (0.08, | (0.02, | (-3.13, | 0.002  |
|                   | 8.54)  | 8.60)  | 0.00)*  |        |   |   |   |   | 25.45)  | 14.80)  | -0.57)  |        | 1.02)  | 0.81)  | -0.69)  |        |
|                   | 8.50   | 8.50   | 0.00    |        |   |   |   |   | 19.25   | 14.70   | -1.02   |        | 0.33   | 0.25   | -1.02   |        |
| Djibouti          | (3.43, | (5.24, | (0.00,  | <0.001 | — | — | — | — | (10.74, | (10.35, | (-1.20, | <0.001 | (0.00, | (0.00, | (-1.81, | 0.011  |
|                   | 18.07) | 13.14) | 0.00)*  |        |   |   |   |   | 32.18)  | 20.39)  | -0.84)  |        | 6.22)  | 2.21)  | -0.24)  |        |
|                   | 7.67   | 7.67   | 0.00    |        |   |   |   |   | 136.28  | 122.89  | -0.32   |        | 2.26   | 2.05   | -0.30   |        |
| Dominica          | (0.20, | (0.17, | (0.00,  | <0.001 | — | — | — | — | (80.42, | (69.50, | (-0.86, | 0.239  | (0.00, | (0.00, | (-0.80, | 0.241  |
|                   | 47.84) | 44.32) | 0.00)*  |        |   |   |   |   | 218.84) | 201.45) | 0.22)   |        | 38.90) | 34.08) | 0.20)   |        |
|                   | 7.67   | 7.67   | 0.00    |        |   |   |   |   | 23.03   | 25.95   | 0.40    |        | 0.38   | 0.43   | 0.43    |        |
| Dominican         | (6.33, | (6.56, | (0.00,  | 0.435  | — | — | — | — | (20.65, | (23.86, | (0.11,  | 0.007  | (0.13, | (0.20, | (-0.07, | 0.093  |
| Republic          | 9.23)  | 8.92)  | 0.00)   |        |   |   |   |   | 25.62)  | 28.17)  | 0.69)   |        | 0.88)  | 0.81)  | 0.94)   |        |
|                   | 7.41   | 7.55   | 0.06    |        |   |   |   |   | 16.68   | 14.84   | -0.53   |        | 0.27   | 0.24   | -0.52   |        |
| Ecuador           | (6.27, | (6.67, | (0.02,  | 0.002  | — | — | — | — | (14.94, | (13.60, | (-0.95, | 0.016  | (0.09, | (0.11, | (-1.07, | 0.072  |
|                   | 8.72)  | 8.50)  | 0.10)   |        |   |   |   |   | 18.57)  | 16.16)  | -0.10)  |        | 0.64)  | 0.47)  | 0.05)   |        |

|                   |        |        |         |        |   |   |   |   |         |         |         |        |        |        |         |        |
|-------------------|--------|--------|---------|--------|---|---|---|---|---------|---------|---------|--------|--------|--------|---------|--------|
|                   | 6.97   | 6.97   | 0.00    |        |   |   |   |   | 47.52   | 30.15   | -1.56   |        | 0.76   | 0.48   | -1.58   |        |
| Egypt             | (6.46, | (6.60, | (0.00,  | <0.001 | — | — | — | — | (46.22, | (29.39, | (-1.81, | <0.001 | (0.60, | (0.39, | (-1.93, | <0.001 |
|                   | 7.50)  | 7.34)  | 0.00)*  |        |   |   |   |   | 48.85)  | 30.92)  | -1.31)  |        | 0.95)  | 0.59)  | -1.21)  |        |
|                   | 7.67   | 7.67   | 0.00    |        |   |   |   |   | 8.28    | 5.06    | -1.64   |        | 0.13   | 0.08   | -1.79   |        |
| El Salvador       | (6.06, | (6.26, | (0.00,  | 0.098  | — | — | — | — | (6.60,  | (3.92,  | (-1.98, | <0.001 | (0.01, | (0.00, | (-2.12, | <0.001 |
|                   | 9.61)  | 9.32)  | 0.00)   |        |   |   |   |   | 10.30)  | 6.43)   | -1.30)  |        | 0.69)  | 0.45)  | -1.47)  |        |
|                   | 8.50   | 8.50   | 0.00    |        |   |   |   |   | 63.59   | 39.24   | -1.67   |        | 1.08   | 0.67   | -1.64   |        |
| Equatorial Guinea | (3.32, | (5.39, | (0.00,  | 0.002  | — | — | — | — | (46.97, | (31.98, | (-2.02, | <0.001 | (0.01, | (0.06, | (-2.05, | <0.001 |
|                   | 18.19) | 12.89) | 0.00)*  |        |   |   |   |   | 84.40)  | 47.75)  | -1.31)  |        | 7.40)  | 2.82)  | -1.23)  |        |
|                   | 8.50   | 8.50   | 0.00    |        |   |   |   |   | 20.64   | 17.50   | -0.65   |        | 0.36   | 0.30   | -0.64   |        |
| Eritrea           | (6.23, | (7.01, | (0.00,  | 1.000  | — | — | — | — | (16.86, | (15.26, | (-0.98, | <0.001 | (0.03, | (0.08, | (-0.98, | <0.001 |
|                   | 11.39) | 10.23) | 0.00)   |        |   |   |   |   | 25.05)  | 19.99)  | -0.31)  |        | 1.45)  | 0.82)  | -0.30)  |        |
|                   | 8.61   | 8.61   | 0.00    |        |   |   |   |   | 70.02   | 39.43   | -1.70   |        | 1.24   | 0.69   | -1.76   |        |
| Estonia           | (5.53, | (4.95, | (0.00,  | 0.124  | — | — | — | — | (60.95, | (31.61, | (-3.17, | 0.027  | (0.32, | (0.05, | (-3.11, | 0.012  |
|                   | 12.87) | 14.27) | 0.00)   |        |   |   |   |   | 80.15)  | 48.96)  | -0.20)  |        | 3.43)  | 3.70)  | -0.39)  |        |
|                   | 8.50   | 8.50   | 0.00    |        |   |   |   |   | 51.58   | 43.02   | -0.63   |        | 0.86   | 0.71   | -0.66   |        |
| Eswatini          | (4.50, | (5.31, | (0.00,  | <0.001 | — | — | — | — | (40.63, | (35.34, | (-0.82, | <0.001 | (0.04, | (0.07, | (-0.90, | <0.001 |
|                   | 14.97) | 13.01) | 0.00)*  |        |   |   |   |   | 64.84)  | 51.96)  | -0.44)  |        | 4.72)  | 2.90)  | -0.41)  |        |
|                   | 9.37   | 9.37   | 0.00    |        |   |   |   |   | 24.52   | 14.95   | -1.68   |        | 0.42   | 0.25   | -1.76   |        |
| Ethiopia          | (8.76, | (8.96, | (0.00,  | <0.001 | — | — | — | — | (23.49, | (14.41, | (-1.81, | <0.001 | (0.29, | (0.18, | (-1.95, | <0.001 |
|                   | 10.02) | 9.80)  | 0.00)*  |        |   |   |   |   | 25.59)  | 15.49)  | -1.55)  |        | 0.58)  | 0.33)  | -1.57)  |        |
|                   | 8.12   | 8.12   | 0.00    |        |   |   |   |   | 51.39   | 57.09   | 0.33    |        | 0.87   | 0.97   | 0.33    |        |
| Fiji              | (4.29, | (4.47, | (0.00,  | <0.001 | — | — | — | — | (40.61, | (46.51, | (0.10,  | 0.004  | (0.05, | (0.09, | (0.18,  | <0.001 |
|                   | 14.14) | 13.59) | 0.00)*  |        |   |   |   |   | 64.26)  | 69.39)  | 0.56)   |        | 4.29)  | 3.89)  | 0.49)   |        |
|                   | 7.74   | 7.74   | -0.01   |        |   |   |   |   | 47.48   | 29.66   | -1.61   |        | 0.78   | 0.48   | -1.68   |        |
| Finland           | (6.01, | (5.95, | (-0.04, | 0.566  | — | — | — | — | (43.12, | (26.07, | (-2.30, | <0.001 | (0.32, | (0.13, | (-2.47, | <0.001 |
|                   | 9.85)  | 9.94)  | 0.02)   |        |   |   |   |   | 52.21)  | 33.64)  | -0.92)  |        | 1.66)  | 1.30)  | -0.88)  |        |
|                   | 7.43   | 7.43   | 0.00    |        |   |   |   |   | 21.31   | 11.14   | -2.29   |        | 0.31   | 0.16   | -2.27   |        |
| France            | (6.93, | (6.91, | (0.00,  | <0.001 | — | — | — | — | (20.45, | (10.49, | (-2.52, | <0.001 | (0.21, | (0.09, | (-2.71, | <0.001 |
|                   | 7.96)  | 7.99)  | 0.00)*  |        |   |   |   |   | 22.19)  | 11.81)  | -2.06)  |        | 0.43)  | 0.26)  | -1.83)  |        |
|                   | 8.50   | 8.50   | 0.00    |        |   |   |   |   | 54.78   | 38.67   | -1.25   |        | 0.94   | 0.65   | -1.29   |        |
| Gabon             | (4.74, | (5.83, | (0.00,  | <0.001 | — | — | — | — | (44.01, | (32.61, | (-1.61, | <0.001 | (0.07, | (0.10, | (-1.58, | <0.001 |
|                   | 14.35) | 12.03) | 0.00)*  |        |   |   |   |   | 67.54)  | 45.57)  | -0.88)  |        | 4.33)  | 2.21)  | -1.00)  |        |

|               |        |        |         |        |         |         |         |        |         |         |         |        |        |        |         |        |
|---------------|--------|--------|---------|--------|---------|---------|---------|--------|---------|---------|---------|--------|--------|--------|---------|--------|
|               | 8.50   | 8.50   | 0.00    |        |         |         |         |        | 44.97   | 36.80   | -0.72   |        | 0.76   | 0.62   | -0.74   |        |
| Gambia        | (4.81, | (6.05, | (0.00,  | <0.001 | —       | —       | —       | —      | (35.58, | (31.38, | (-1.05, | <0.001 | (0.04, | (0.11, | (-1.07, | <0.001 |
|               | 14.26) | 11.69) | 0.00)*  |        |         |         |         |        | 56.32)  | 42.94)  | -0.40)  |        | 4.07)  | 2.01)  | -0.42)  |        |
|               | 8.83   | 8.83   | 0.00    |        |         |         |         |        | 40.85   | 27.02   | -1.44   |        | 0.69   | 0.46   | -1.46   |        |
| Georgia       | (7.15, | (6.56, | (0.00,  | <0.001 | —       | —       | —       | —      | (37.17, | (23.05, | (-2.22, | <0.001 | (0.29, | (0.09, | (-2.30, | 0.001  |
|               | 10.81) | 11.72) | 0.00)*  |        |         |         |         |        | 44.81)  | 31.56)  | -0.65)  |        | 1.41)  | 1.56)  | -0.61)  |        |
|               | 7.81   | 7.81   | -0.00   |        |         |         |         |        | 36.54   | 17.38   | -2.57   |        | 0.58   | 0.27   | -2.66   |        |
| Germany       | (7.36, | (7.32, | (-0.00, | <0.001 | —       | —       | —       | —      | (35.56, | (16.64, | (-2.77, | <0.001 | (0.46, | (0.18, | (-3.13, | <0.001 |
|               | 8.29)  | 8.33)  | -0.00)* |        |         |         |         |        | 37.54)  | 18.14)  | -2.36)  |        | 0.72)  | 0.38)  | -2.19)  |        |
|               | 8.50   | 8.50   | 0.00    |        |         |         |         |        | 94.47   | 91.68   | -0.10   |        | 1.62   | 1.58   | -0.08   |        |
| Ghana         | (7.46, | (7.83, | (0.00,  | <0.001 | —       | —       | —       | —      | (90.86, | (89.42, | (-0.25, | 0.188  | (1.17, | (1.29, | (-0.23, | 0.293  |
|               | 9.65)  | 9.22)  | 0.00)*  |        |         |         |         |        | 98.19)  | 93.98)  | 0.05)   |        | 2.18)  | 1.91)  | 0.07)   |        |
|               | 7.43   | 7.43   | 0.00    |        |         |         |         |        | 23.51   | 12.51   | -2.11   |        | 0.38   | 0.20   | -2.11   |        |
| Greece        | (6.25, | (6.09, | (0.00,  | <0.001 | —       | —       | —       | —      | (21.37, | (10.78, | (-2.89, | <0.001 | (0.15, | (0.04, | (-2.83, | <0.001 |
|               | 8.78)  | 9.01)  | 0.00)*  |        |         |         |         |        | 25.81)  | 14.47)  | -1.33)  |        | 0.78)  | 0.63)  | -1.38)  |        |
|               | 8.36   | 8.36   | 0.00    |        | 77.09   | 44.91   | -1.80   |        | 77.95   | 47.96   | -1.59   |        | 1.21   | 0.72   | -1.70   |        |
| Greenland     | (0.18, | (0.11, | (0.00,  | 0.001  | (36.46, | (14.01, | (-2.19, | <0.001 | (35.82, | (15.30, | (-2.05, | <0.001 | (0.00, | (0.00, | (-2.20, | <0.001 |
|               | 59.90) | 59.33) | 0.00)*  |        | 152.00) | 112.73) | -1.40)  |        | 155.20) | 117.82) | -1.12)  |        | 48.76) | 46.16) | -1.20)  |        |
|               | 7.67   | 7.67   | 0.00    |        |         |         |         |        | 111.12  | 80.20   | -1.13   |        | 1.87   | 1.35   | -1.21   |        |
| Grenada       | (0.34, | (0.53, | (0.00,  | <0.001 | —       | —       | —       | —      | (64.93, | (44.97, | (-1.60, | <0.001 | (0.00, | (0.00, | (-1.57, | <0.001 |
|               | 41.13) | 35.27) | 0.00)*  |        |         |         |         |        | 179.28) | 133.16) | -0.66)  |        | 31.52) | 24.67) | -0.86)  |        |
|               | 8.12   | 8.12   | 0.00    |        |         |         |         |        | 58.78   | 51.12   | -0.40   |        | 0.99   | 0.87   | -0.37   |        |
| Guam          | (1.22, | (1.21, | (0.00,  | 1.000  | —       | —       | —       | —      | (34.10, | (28.26, | (-1.15, | 0.300  | (0.00, | (0.00, | (-1.12, | 0.347  |
|               | 27.71) | 27.87) | 0.00)   |        |         |         |         |        | 94.81)  | 85.56)  | 0.36)   |        | 15.81) | 15.82) | 0.40)   |        |
|               | 7.67   | 7.67   | 0.00    |        |         |         |         |        | 13.99   | 11.36   | -0.91   |        | 0.23   | 0.19   | -0.81   |        |
| Guatemala     | (6.30, | (6.83, | (0.00,  | 0.041  | —       | —       | —       | —      | (12.09, | (10.33, | (-2.34, | 0.223  | (0.05, | (0.08, | (-1.99, | 0.180  |
|               | 9.27)  | 8.59)  | 0.00)*  |        |         |         |         |        | 16.10)  | 12.47)  | 0.56)   |        | 0.69)  | 0.38)  | 0.38)   |        |
|               | 8.50   | 8.50   | 0.00    |        |         |         |         |        | 65.35   | 46.30   | -1.18   |        | 1.12   | 0.78   | -1.23   |        |
| Guinea        | (6.88, | (7.39, | (0.00,  | <0.001 | —       | —       | —       | —      | (60.66, | (43.64, | (-1.36, | <0.001 | (0.58, | (0.47, | (-1.41, | <0.001 |
|               | 10.40) | 9.73)  | 0.00)*  |        |         |         |         |        | 70.33)  | 49.10)  | -0.99)  |        | 1.97)  | 1.24)  | -1.04)  |        |
|               | 8.50   | 8.50   | 0.00    |        |         |         |         |        | 76.87   | 51.86   | -1.34   |        | 1.32   | 0.88   | -1.41   |        |
| Guinea-Bissau | (4.87, | (5.90, | (0.00,  | <0.001 | —       | —       | —       | —      | (64.60, | (45.01, | (-1.52, | <0.001 | (0.20, | (0.21, | (-1.56, | <0.001 |
|               | 13.98) | 11.93) | 0.00)*  |        |         |         |         |        | 90.90)  | 59.53)  | -1.16)  |        | 4.59)  | 2.52)  | -1.26)  |        |

|                               |        |        |         |        |   |   |   |   |          |          |         |        |        |        |         |        |
|-------------------------------|--------|--------|---------|--------|---|---|---|---|----------|----------|---------|--------|--------|--------|---------|--------|
|                               | 7.67   | 7.67   | 0.00    |        |   |   |   |   | 111.69   | 117.34   | 0.10    |        | 1.87   | 1.98   | 0.14    |        |
| Guyana                        | (4.03, | (3.98, | (0.00,  | <0.001 | — | — | — | — | (95.98,  | (100.94, | (-1.16, | 0.875  | (0.38, | (0.42, | (-1.00, | 0.809  |
|                               | 13.49) | 13.51) | 0.00)*  |        |   |   |   |   | 129.41)  | 135.72)  | 1.38)   |        | 5.80)  | 5.90)  | 1.29)   |        |
|                               | 7.67   | 7.67   | 0.00    |        |   |   |   |   | 109.24   | 100.68   | -0.21   |        | 1.83   | 1.68   | -0.24   |        |
| Haiti                         | (6.21, | (6.67, | (0.00,  | <0.001 | — | — | — | — | (103.46, | (96.98,  | (-0.41, | 0.040  | (1.15, | (1.23, | (-0.42, | 0.010  |
|                               | 9.39)  | 8.78)  | 0.00)*  |        |   |   |   |   | 115.27)  | 104.50)  | -0.01)  |        | 2.79)  | 2.24)  | -0.06)  |        |
|                               | 7.67   | 7.67   | 0.00    |        |   |   |   |   | 42.16    | 22.69    | -2.19   |        | 0.72   | 0.39   | -2.16   |        |
| Honduras                      | (5.90, | (6.54, | (0.00,  | 0.082  | — | — | — | — | (37.75,  | (20.67,  | (-2.74, | <0.001 | (0.25, | (0.17, | (-2.77, | <0.001 |
|                               | 9.84)  | 8.95)  | 0.00)   |        |   |   |   |   | 46.98)   | 24.87)   | -1.64)  |        | 1.65)  | 0.78)  | -1.56)  |        |
|                               | 7.62   | 7.62   | 0.00    |        |   |   |   |   | 97.18    | 28.40    | -4.16   |        | 1.67   | 0.48   | -4.22   |        |
| Hungary                       | (6.40, | (6.24, | (0.00,  | <0.001 | — | — | — | — | (92.80,  | (25.74,  | (-4.91, | <0.001 | (1.14, | (0.19, | (-5.07, | <0.001 |
|                               | 9.01)  | 9.25)  | 0.00)*  |        |   |   |   |   | 101.74)  | 31.29)   | -3.42)  |        | 2.37)  | 1.03)  | -3.36)  |        |
|                               | 7.43   | 7.43   | 0.00    |        |   |   |   |   | 9.96     | 4.76     | -2.52   |        | 0.15   | 0.07   | -2.68   |        |
| Iceland                       | (1.93, | (2.16, | (0.00,  | <0.001 | — | — | — | — | (3.27,   | (0.88,   | (-2.61, | <0.001 | (0.00, | (0.00, | (-3.11, | <0.001 |
|                               | 19.86) | 19.12) | 0.00)*  |        |   |   |   |   | 23.44)   | 15.28)   | -2.42)  |        | 8.17)  | 7.69)  | -2.25)  |        |
|                               | 9.37   | 9.37   | 0.00    |        |   |   |   |   | 6.81     | 5.74     | -0.66   |        | 0.11   | 0.10   | -0.48   |        |
| India                         | (9.22, | (9.26, | (0.00,  | <0.001 | — | — | — | — | (6.68,   | (5.66,   | (-1.26, | 0.032  | (0.10, | (0.08, | (-1.16, | 0.178  |
|                               | 9.52)  | 9.48)  | 0.00)*  |        |   |   |   |   | 6.94)    | 5.83)    | -0.06)  |        | 0.13)  | 0.11)  | 0.22)   |        |
|                               | 8.38   | 8.38   | 0.00    |        |   |   |   |   | 31.47    | 23.84    | -0.94   |        | 0.53   | 0.40   | -0.98   |        |
| Indonesia                     | (8.10, | (8.14, | (0.00,  | <0.001 | — | — | — | — | (30.90,  | (23.43,  | (-1.08, | <0.001 | (0.46, | (0.35, | (-1.12, | <0.001 |
|                               | 8.68)  | 8.64)  | 0.00)*  |        |   |   |   |   | 32.05)   | 24.27)   | -0.80)  |        | 0.61)  | 0.45)  | -0.83)  |        |
|                               | 7.67   | 7.67   | 0.00    |        |   |   |   |   | 15.11    | 12.55    | -0.67   |        | 0.24   | 0.20   | -0.67   |        |
| Iran (Islamic<br>Republic of) | (7.14, | (7.26, | (-0.00, | 1.000  | — | — | — | — | (14.38,  | (12.01,  | (-0.95, | <0.001 | (0.16, | (0.14, | (-1.09, | 0.002  |
|                               | 8.23)  | 8.10)  | 0.00)   |        |   |   |   |   | 15.88)   | 13.10)   | -0.39)  |        | 0.36)  | 0.28)  | -0.25)  |        |
|                               | 6.97   | 6.97   | 0.00    |        |   |   |   |   | 58.56    | 40.36    | -1.24   |        | 0.96   | 0.66   | -1.25   |        |
| Iraq                          | (6.05, | (6.42, | (0.00,  | <0.001 | — | — | — | — | (55.83,  | (39.03,  | (-1.48, | <0.001 | (0.64, | (0.50, | (-1.54, | <0.001 |
|                               | 7.99)  | 7.55)  | 0.00)*  |        |   |   |   |   | 61.40)   | 41.73)   | -1.00)  |        | 1.40)  | 0.86)  | -0.97)  |        |
|                               | 7.43   | 7.43   | 0.00    |        |   |   |   |   | 40.64    | 9.91     | -4.80   |        | 0.65   | 0.15   | -5.00   |        |
| Ireland                       | (5.52, | (5.67, | (0.00,  | 0.001  | — | — | — | — | (35.96,  | (7.86,   | (-5.56, | <0.001 | (0.19, | (0.01, | (-5.91, | <0.001 |
|                               | 9.80)  | 9.60)  | 0.00)*  |        |   |   |   |   | 45.76)   | 12.35)   | -4.03)  |        | 1.62)  | 0.79)  | -4.09)  |        |
|                               | 7.43   | 7.43   | 0.00    |        |   |   |   |   | 24.82    | 8.91     | -3.52   |        | 0.39   | 0.13   | -3.79   |        |
| Israel                        | (5.80, | (6.16, | (0.00,  | 0.001  | — | — | — | — | (21.75,  | (7.51,   | (-4.10, | <0.001 | (0.10, | (0.02, | (-4.21, | <0.001 |
|                               | 9.39)  | 8.90)  | 0.00)*  |        |   |   |   |   | 28.20)   | 10.50)   | -2.93)  |        | 1.05)  | 0.47)  | -3.38)  |        |

|              |        |        |         |        |        |        |         |        |          |          |         |        |        |        |         |        |
|--------------|--------|--------|---------|--------|--------|--------|---------|--------|----------|----------|---------|--------|--------|--------|---------|--------|
|              | 8.04   | 7.93   | -0.08   |        |        |        |         |        | 27.88    | 7.42     | -4.49   |        | 0.44   | 0.10   | -4.97   |        |
| Italy        | (7.50, | (7.31, | (-0.13, | 0.007  | —      | —      | —       | —      | (26.88,  | (6.83,   | (-4.81, | <0.001 | (0.32, | (0.04, | (-5.43, | <0.001 |
|              | 8.60)  | 8.58)  | -0.02)  |        |        |        |         |        | 28.90)   | 8.06)    | -4.16)  |        | 0.58)  | 0.20)  | -4.51)  |        |
|              | 7.67   | 7.67   | 0.00    |        |        |        |         |        | 49.30    | 50.97    | 0.34    |        | 0.83   | 0.87   | 0.37    |        |
| Jamaica      | (5.38, | (5.61, | (0.00,  | <0.001 | —      | —      | —       | —      | (43.04,  | (45.41,  | (-0.51, | 0.436  | (0.21, | (0.29, | (-0.48, | 0.396  |
|              | 10.69) | 10.25) | 0.00)*  |        |        |        |         |        | 56.27)   | 57.04)   | 1.20)   |        | 2.32)  | 2.02)  | 1.22)   |        |
|              | 9.90   | 9.05   | -0.31   |        | 1.62   | 0.27   | -6.35   |        | 35.66    | 17.57    | -2.41   |        | 0.53   | 0.24   | -2.81   |        |
| Japan        | (9.49, | (8.58, | (-0.32, | <0.001 | (1.46, | (0.20, | (-8.82, | <0.001 | (34.87,  | (16.93,  | (-2.73, | <0.001 | (0.44, | (0.17, | (-3.25, | <0.001 |
|              | 10.33) | 9.53)  | -0.31)  |        | 1.80)  | 0.38)  | -3.80)  |        | 36.46)   | 18.24)   | -2.10)  |        | 0.64)  | 0.33)  | -2.36)  |        |
|              | 6.97   | 6.97   | 0.00    |        |        |        |         |        | 13.56    | 5.53     | -3.03   |        | 0.22   | 0.08   | -3.45   |        |
| Jordan       | (5.05, | (5.91, | (0.00,  | <0.001 | —      | —      | —       | —      | (10.81,  | (4.59,   | (-3.47, | <0.001 | (0.01, | (0.01, | (-4.45, | <0.001 |
|              | 9.46)  | 8.16)  | 0.00)*  |        |        |        |         |        | 16.87)   | 6.60)    | -2.59)  |        | 1.17)  | 0.33)  | -2.44)  |        |
|              | 8.83   | 8.83   | 0.00    |        |        |        |         |        | 38.39    | 261.00   | 7.12    |        | 0.65   | 4.63   | 7.32    |        |
| Kazakhstan   | (7.86, | (7.87, | (0.00,  | 0.011  | —      | —      | —       | —      | (36.34,  | (255.86, | (6.33,  | <0.001 | (0.40, | (3.97, | (6.51,  | <0.001 |
|              | 9.90)  | 9.89)  | 0.00)*  |        |        |        |         |        | 40.54)   | 266.23)  | 7.92)   |        | 0.98)  | 5.38)  | 8.14)   |        |
|              | 9.37   | 9.37   | 0.00    |        |        |        |         |        | 15.52    | 16.03    | 0.09    |        | 0.26   | 0.27   | 0.11    |        |
| Kenya        | (8.44, | (8.79, | (0.00,  | <0.001 | —      | —      | —       | —      | (14.26,  | (15.26,  | (-0.04, | 0.179  | (0.12, | (0.18, | (-0.07, | 0.224  |
|              | 10.39) | 9.98)  | 0.00)*  |        |        |        |         |        | 16.87)   | 16.84)   | 0.22)   |        | 0.51)  | 0.40)  | 0.28)   |        |
|              | 8.12   | 8.12   | 0.00    |        |        |        |         |        | 47.21    | 48.96    | 0.12    |        | 0.81   | 0.84   | 0.11    |        |
| Kiribati     | (0.37, | (0.99, | (0.00,  | 1.000  | —      | —      | —       | —      | (18.76,  | (25.31,  | (0.02,  | 0.015  | (0.00, | (0.00, | (-0.05, | 0.175  |
|              | 43.25) | 30.05) | 0.00)   |        |        |        |         |        | 100.06)  | 85.99)   | 0.22)   |        | 31.04) | 17.76) | 0.28)   |        |
|              | 6.97   | 6.97   | 0.00    |        |        |        |         |        | 30.85    | 14.96    | -2.33   |        | 0.49   | 0.23   | -2.47   |        |
| Kuwait       | (4.51, | (5.36, | (0.00,  | <0.001 | —      | —      | —       | —      | (25.33,  | (12.48,  | (-3.36, | <0.001 | (0.05, | (0.03, | (-3.63, | <0.001 |
|              | 10.35) | 9.01)  | 0.00)*  |        |        |        |         |        | 37.26)   | 17.87)   | -1.29)  |        | 2.03)  | 1.04)  | -1.28)  |        |
|              | 8.83   | 8.83   | 0.00    |        |        |        |         |        | 61.27    | 71.50    | 0.46    |        | 1.07   | 1.27   | 0.53    |        |
| Kyrgyzstan   | (6.98, | (7.30, | (0.00,  | <0.001 | —      | —      | —       | —      | (56.10,  | (66.95,  | (-0.20, | 0.169  | (0.49, | (0.73, | (-0.16, | 0.129  |
|              | 11.05) | 10.61) | 0.00)*  |        |        |        |         |        | 66.81)   | 76.28)   | 1.12)   |        | 2.06)  | 2.06)  | 1.23)   |        |
| Lao People's | 7.48   | 7.48   | 0.00    |        |        |        |         |        | 19.49    | 27.74    | 1.25    |        | 0.33   | 0.47   | 1.28    |        |
| Democratic   | (5.67, | (6.18, | (0.00,  | <0.001 | —      | —      | —       | —      | (16.39,  | (25.15,  | (1.06,  | <0.001 | (0.05, | (0.19, | (0.89,  | <0.001 |
| Republic     | 9.72)  | 8.98)  | 0.00)*  |        |        |        |         |        | 23.03)   | 30.52)   | 1.45)   |        | 1.16)  | 0.98)  | 1.66)   |        |
|              | 8.23   | 8.23   | -0.02   |        |        |        |         |        | 169.16   | 158.75   | -0.13   |        | 3.00   | 2.81   | -0.14   |        |
| Latvia       | (5.85, | (5.14, | (-0.09, | 0.664  | —      | —      | —       | —      | (157.98, | (145.06, | (-1.25, | 0.816  | (1.68, | (1.28, | (-1.27, | 0.805  |
|              | 11.29) | 12.68) | 0.05)   |        |        |        |         |        | 180.97)  | 173.60)  | 0.99)   |        | 5.01)  | 5.72)  | 1.00)   |        |

|            |        |        |         |        |   |   |   |   |         |         |         |        |        |        |         |        |
|------------|--------|--------|---------|--------|---|---|---|---|---------|---------|---------|--------|--------|--------|---------|--------|
|            | 6.97   | 6.97   | 0.00    |        |   |   |   |   | 27.69   | 14.45   | -2.21   |        | 0.45   | 0.23   | -2.34   |        |
| Lebanon    | (5.00, | (5.43, | (0.00,  | <0.001 | — | — | — | — | (23.59, | (12.17, | (-2.31, | <0.001 | (0.08, | (0.03, | (-2.51, | <0.001 |
|            | 9.48)  | 8.85)  | 0.00)*  |        |   |   |   |   | 32.32)  | 17.08)  | -2.12)  |        | 1.45)  | 0.86)  | -2.18)  |        |
|            | 8.50   | 8.50   |         |        |   |   |   |   | 43.47   | 43.42   | -0.02   |        | 0.73   | 0.72   | -0.07   |        |
| Lesotho    | (5.65, | (6.04, | —       | —      | — | — | — | — | (36.59, | (37.58, | (-0.32, | 0.873  | (0.11, | (0.16, | (-0.41, | 0.686  |
|            | 12.42) | 11.67) |         |        |   |   |   |   | 51.39)  | 49.95)  | 0.27)   |        | 2.63)  | 2.08)  | 0.27)   |        |
|            | 8.50   | 8.50   | 0.00    |        |   |   |   |   | 58.26   | 41.59   | -1.16   |        | 0.99   | 0.70   | -1.20   |        |
| Liberia    | (5.72, | (6.77, | (0.00,  | <0.001 | — | — | — | — | (50.40, | (37.60, | (-1.45, | <0.001 | (0.23, | (0.27, | (-1.51, | <0.001 |
|            | 12.19) | 10.55) | 0.00)*  |        |   |   |   |   | 67.01)  | 45.90)  | -0.88)  |        | 2.79)  | 1.49)  | -0.89)  |        |
|            | 6.97   | 6.97   | 0.00    |        |   |   |   |   | 26.29   | 19.66   | -0.96   |        | 0.42   | 0.31   | -1.01   |        |
| Libya      | (5.11, | (5.68, | (0.00,  | <0.001 | — | — | — | — | (22.61, | (17.45, | (-1.30, | <0.001 | (0.08, | (0.09, | (-1.36, | <0.001 |
|            | 9.35)  | 8.46)  | 0.00)*  |        |   |   |   |   | 30.46)  | 22.09)  | -0.61)  |        | 1.40)  | 0.77)  | -0.67)  |        |
|            | 9.10   | 9.10   | -0.00   |        |   |   |   |   | 61.57   | 55.00   | -0.40   |        | 1.06   | 0.96   | -0.35   |        |
| Lithuania  | (6.99, | (6.41, | (-0.06, | 0.978  | — | — | — | — | (55.91, | (48.27, | (-1.85, | 0.587  | (0.44, | (0.28, | (-1.80, | 0.640  |
|            | 11.66) | 12.65) | 0.06)   |        |   |   |   |   | 67.67)  | 62.53)  | 1.06)   |        | 2.18)  | 2.62)  | 1.12)   |        |
|            | 7.20   | 7.20   | -0.02   |        |   |   |   |   | 26.01   | 9.51    | -3.38   |        | 0.41   | 0.14   | -3.77   |        |
| Luxembourg | (2.39, | (3.00, | (-0.11, | 0.757  | — | — | — | — | (15.61, | (4.52,  | (-3.74, | <0.001 | (0.00, | (0.00, | (-4.13, | <0.001 |
|            | 17.97) | 15.24) | 0.08)   |        |   |   |   |   | 41.76)  | 18.25)  | -3.02)  |        | 8.16)  | 5.17)  | -3.40)  |        |
|            | 8.50   | 8.50   | 0.00    |        |   |   |   |   | 60.02   | 46.69   | -0.86   |        | 1.03   | 0.80   | -0.88   |        |
| Madagascar | (7.31, | (7.73, | (0.00,  | <0.001 | — | — | — | — | (56.67, | (44.81, | (-1.23, | <0.001 | (0.63, | (0.57, | (-1.30, | <0.001 |
|            | 9.85)  | 9.33)  | 0.00)*  |        |   |   |   |   | 63.52)  | 48.64)  | -0.50)  |        | 1.60)  | 1.10)  | -0.46)  |        |
|            | 8.50   | 8.50   | 0.00    |        |   |   |   |   | 22.22   | 18.08   | -0.67   |        | 0.38   | 0.31   | -0.66   |        |
| Malawi     | (7.18, | (7.58, | (0.00,  | <0.001 | — | — | — | — | (19.96, | (16.69, | (-0.78, | <0.001 | (0.14, | (0.15, | (-0.81, | <0.001 |
|            | 10.02) | 9.50)  | 0.00)*  |        |   |   |   |   | 24.67)  | 19.55)  | -0.56)  |        | 0.85)  | 0.56)  | -0.51)  |        |
|            | 7.48   | 7.48   | 0.00    |        |   |   |   |   | 33.96   | 26.42   | -0.88   |        | 0.55   | 0.42   | -0.92   |        |
| Malaysia   | (6.62, | (6.83, | (0.00,  | 0.368  | — | — | — | — | (32.08, | (25.19, | (-1.08, | <0.001 | (0.33, | (0.28, | (-1.18, | <0.001 |
|            | 8.42)  | 8.17)  | 0.00)   |        |   |   |   |   | 35.92)  | 27.70)  | -0.68)  |        | 0.86)  | 0.61)  | -0.67)  |        |
|            | 7.48   | 7.48   | 0.00    |        |   |   |   |   | 15.18   | 6.81    | -2.56   |        | 0.25   | 0.11   | -2.80   |        |
| Maldives   | (1.39, | (2.87, | (0.00,  | <0.001 | — | — | — | — | (5.05,  | (2.55,  | (-2.78, | <0.001 | (0.00, | (0.00, | (-3.23, | <0.001 |
|            | 26.50) | 16.67) | 0.00)*  |        |   |   |   |   | 37.62)  | 15.58)  | -2.34)  |        | 15.89) | 5.97)  | -2.37)  |        |
|            | 8.50   | 8.50   | 0.00    |        |   |   |   |   | 105.12  | 60.12   | -1.88   |        | 1.80   | 1.02   | -1.93   |        |
| Mali       | (7.09, | (7.61, | (0.00,  | <0.001 | — | — | — | — | (99.92, | (57.66, | (-2.02, | <0.001 | (1.18, | (0.72, | (-2.06, | <0.001 |
|            | 10.12) | 9.47)  | 0.00)*  |        |   |   |   |   | 110.55) | 62.67)  | -1.75)  |        | 2.66)  | 1.41)  | -1.81)  |        |



|                   |         |         |         |        |   |   |   |          |         |         |        |         |        |         |        |
|-------------------|---------|---------|---------|--------|---|---|---|----------|---------|---------|--------|---------|--------|---------|--------|
|                   | 7.43    | 7.43    | 0.00    |        |   |   |   | 44.69    | 22.50   | -2.31   |        | 0.71    | 0.35   | -2.37   |        |
| Malta             | (2.43,  | (2.37,  | (0.00,  | <0.001 | — | — | — | (30.22,  | (12.48, | (-2.60, | <0.001 | (0.00,  | (0.00, | (-2.76, | <0.001 |
|                   | 17.87)  | 18.88)  | 0.00)*  |        |   |   |   | 64.08)   | 38.38)  | -2.01)  |        | 7.75)   | 8.54)  | -1.97)  |        |
|                   | 8.12    | 8.12    | 0.00    |        |   |   |   | 57.30    | 67.92   | 0.59    |        | 1.00    | 1.17   | 0.54    |        |
| Marshall Islands  | (0.04,  | (0.16,  | (0.00,  | 0.001  | — | — | — | (16.40,  | (28.88, | (0.55,  | <0.001 | (0.00,  | (0.00, | (0.46,  | <0.001 |
|                   | 70.79)  | 48.51)  | 0.00)*  |        |   |   |   | 147.03)  | 135.72) | 0.62)   |        | 58.75)  | 35.81) | 0.62)   |        |
|                   | 8.50    | 8.50    | 0.00    |        |   |   |   | 52.22    | 29.01   | -1.97   |        | 0.89    | 0.49   | -2.05   |        |
| Mauritania        | (5.81,  | (6.59,  | (0.00,  | <0.001 | — | — | — | (45.04,  | (25.30, | (-2.30, | <0.001 | (0.19,  | (0.12, | (-2.23, | <0.001 |
|                   | 12.08)  | 10.83)  | 0.00)*  |        |   |   |   | 60.27)   | 33.13)  | -1.64)  |        | 2.62)   | 1.35)  | -1.88)  |        |
|                   | 7.48    | 7.48    | 0.00    |        |   |   |   | 19.55    | 29.22   | 1.67    |        | 0.32    | 0.49   | 1.82    |        |
| Mauritius         | (4.45,  | (4.38,  | (0.00,  | 1.000  | — | — | — | (14.40,  | (22.71, | (1.23,  | <0.001 | (0.00,  | (0.02, | (1.36,  | <0.001 |
|                   | 11.82)  | 11.99)  | 0.00)   |        |   |   |   | 25.97)   | 37.07)  | 2.10)   |        | 2.20)   | 2.62)  | 2.28)   |        |
|                   | 8.60    | 8.60    | 0.00    |        |   |   |   | 10.97    | 12.01   | 0.56    |        | 0.17    | 0.19   | 0.58    |        |
| Mexico            | (8.17,  | (8.25,  | (-0.00, | 1.000  | — | — | — | (10.47,  | (11.59, | (0.26,  | <0.001 | (0.12,  | (0.14, | (-0.19, | 0.143  |
|                   | 9.06)   | 8.97)   | 0.00)   |        |   |   |   | 11.47)   | 12.44)  | 0.86)   |        | 0.25)   | 0.25)  | 1.36)   |        |
| Micronesia        | 8.12    | 8.12    | 0.00    |        |   |   |   | 53.13    | 60.74   | 0.47    |        | 0.92    | 1.03   | 0.39    |        |
| (Federated States | (0.60,  | (0.68,  | (0.00,  | 1.000  | — | — | — | (24.55,  | (31.02, | (0.39,  | <0.001 | (0.00,  | (0.00, | (0.25,  | <0.001 |
| of)               | 37.90)  | 35.52)  | 0.00)   |        |   |   |   | 101.68)  | 108.12) | 0.55)   |        | 26.21)  | 23.75) | 0.52)   |        |
|                   | 7.43    | 7.43    | 0.00    |        |   |   |   | 48.13    | 27.20   | -1.95   |        | 0.76    | 0.43   | -1.97   |        |
| Monaco            | (0.00,  | (0.00,  | (0.00,  | 1.000  | — | — | — | (6.53,   | (1.33,  | (-2.01, | <0.001 | (0.00,  | (0.00, | (-2.17, | <0.001 |
|                   | 137.38) | 104.79) | 0.00)   |        |   |   |   | 197.62)  | 138.27) | -1.89)  |        | 127.08) | 91.93) | -1.77)  |        |
|                   | 8.83    | 8.83    | 0.00    |        |   |   |   | 113.68   | 77.72   | -1.27   |        | 1.96    | 1.33   | -1.29   |        |
| Mongolia          | (6.18,  | (6.72,  | (0.00,  | 0.021  | — | — | — | (103.16, | (71.39, | (-1.59, | <0.001 | (0.80,  | (0.63, | (-1.63, | <0.001 |
|                   | 12.38)  | 11.47)  | 0.00)*  |        |   |   |   | 125.08)  | 84.53)  | -0.95)  |        | 4.15)   | 2.60)  | -0.96)  |        |
|                   | 7.62    | 7.62    | 0.00    |        |   |   |   | 87.64    | 70.58   | -0.59   |        | 1.50    | 1.21   | -0.61   |        |
| Montenegro        | (3.53,  | (3.26,  | (0.00,  | <0.001 | — | — | — | (71.84,  | (55.63, | (-1.10, | 0.024  | (0.16,  | (0.07, | (-1.12, | 0.020  |
|                   | 14.39)  | 15.38)  | 0.00)*  |        |   |   |   | 105.92)  | 88.55)  | -0.08)  |        | 5.78)   | 6.16)  | -0.09)  |        |
|                   | 6.97    | 6.97    | 0.00    |        |   |   |   | 22.73    | 15.13   | -1.37   |        | 0.37    | 0.24   | -1.47   |        |
| Morocco           | (6.25,  | (6.37,  | (0.00,  | <0.001 | — | — | — | (21.43,  | (14.25, | (-1.53, | <0.001 | (0.22,  | (0.14, | (-1.76, | <0.001 |
|                   | 7.74)   | 7.60)   | 0.00)*  |        |   |   |   | 24.09)   | 16.05)  | -1.20)  |        | 0.59)   | 0.39)  | -1.17)  |        |
|                   | 8.50    | 8.50    | 0.00    |        |   |   |   | 13.38    | 14.09   | 0.17    |        | 0.23    | 0.24   | 0.15    |        |
| Mozambique        | (7.37,  | (7.74,  | (0.00,  | <0.001 | — | — | — | (11.92,  | (13.07, | (0.06,  | 0.003  | (0.08,  | (0.12, | (-0.15, | 0.330  |
|                   | 9.76)   | 9.31)   | 0.00)*  |        |   |   |   | 14.98)   | 15.17)  | 0.28)   |        | 0.54)   | 0.43)  | 0.44)   |        |

|                 |          |          |         |        |   |   |   |   |          |          |         |        |          |          |         |        |
|-----------------|----------|----------|---------|--------|---|---|---|---|----------|----------|---------|--------|----------|----------|---------|--------|
|                 | 7.48     | 7.48     | 0.00    |        |   |   |   |   | 38.77    | 28.75    | -1.04   |        | 0.65     | 0.48     | -1.05   |        |
| Myanmar         | (6.90,   | (6.98,   | (0.00,  | <0.001 | — | — | — | — | (37.43,  | (27.77,  | (-1.22, | <0.001 | (0.49,   | (0.36,   | (-1.27, | <0.001 |
|                 | 8.09)    | 8.00)    | 0.00)*  |        |   |   |   |   | 40.15)   | 29.76)   | -0.86)  |        | 0.85)    | 0.63)    | -0.83)  |        |
|                 | 8.50     | 8.50     | 0.00    |        |   |   |   |   | 43.65    | 31.80    | -1.07   |        | 0.73     | 0.52     | -1.08   |        |
| Namibia         | (5.36,   | (6.16,   | (0.00,  | <0.001 | — | — | — | — | (35.96,  | (27.09,  | (-1.61, | <0.001 | (0.08,   | (0.09,   | (-1.63, | <0.001 |
|                 | 12.99)   | 11.47)   | 0.00)*  |        |   |   |   |   | 52.64)   | 37.12)   | -0.53)  |        | 3.04)    | 1.69)    | -0.52)  |        |
|                 | 8.12     | 8.12     | 0.00    |        |   |   |   |   | 59.10    | 64.85    | 0.31    |        | 1.02     | 1.11     | 0.29    |        |
| Nauru           | (0.00,   | (0.00,   | (0.00,  | <0.001 | — | — | — | — | (2.15,   | (4.05,   | (0.26,  | <0.001 | (0.00,   | (0.00,   | (0.20,  | <0.001 |
|                 | 222.66)  | 201.26)  | 0.00)*  |        |   |   |   |   | 313.76)  | 300.13)  | 0.37)   |        | 209.21)  | 188.05)  | 0.38)   |        |
|                 | 8.50     | 8.50     | 0.00    |        |   |   |   |   | 5.10     | 4.26     | -0.63   |        | 0.09     | 0.07     | -0.85   |        |
| Nepal           | (7.57,   | (7.83,   | (0.00,  | 0.001  | — | — | — | — | (4.37,   | (3.78,   | (-0.75, | <0.001 | (0.02,   | (0.02,   | (-0.85, | <0.001 |
|                 | 9.51)    | 9.22)    | 0.00)*  |        |   |   |   |   | 5.92)    | 4.79)    | -0.50)  |        | 0.27)    | 0.17)    | -0.85)  |        |
|                 | 7.43     | 7.43     | 0.00    |        |   |   |   |   | 26.56    | 8.95     | -3.67   |        | 0.42     | 0.13     | -3.97   |        |
| Netherlands     | (6.48,   | (6.43,   | (0.00,  | 0.001  | — | — | — | — | (24.74,  | (7.84,   | (-4.22, | <0.001 | (0.22,   | (0.03,   | (-4.39, | <0.001 |
|                 | 8.49)    | 8.56)    | 0.00)*  |        |   |   |   |   | 28.49)   | 10.18)   | -3.12)  |        | 0.74)    | 0.37)    | -3.56)  |        |
|                 | 7.60     | 7.35     | -0.12   |        |   |   |   |   | 67.95    | 30.97    | -2.79   |        | 1.11     | 0.51     | -2.73   |        |
| New Zealand     | (5.69,   | (5.50,   | (-0.16, | <0.001 | — | — | — | — | (61.97,  | (27.07,  | (-3.10, | <0.001 | (0.47,   | (0.13,   | (-3.02, | <0.001 |
|                 | 9.95)    | 9.63)    | -0.08)  |        |   |   |   |   | 74.36)   | 35.30)   | -2.49)  |        | 2.22)    | 1.37)    | -2.43)  |        |
|                 | 7.67     | 7.67     | 0.00    |        |   |   |   |   | 18.59    | 14.50    | -0.92   |        | 0.30     | 0.23     | -1.16   |        |
| Nicaragua       | (5.76,   | (6.28,   | (0.00,  | 0.005  | — | — | — | — | (15.55,  | (12.57,  | (-1.95, | 0.083  | (0.04,   | (0.05,   | (-1.72, | <0.001 |
|                 | 10.06)   | 9.28)    | 0.00)*  |        |   |   |   |   | 22.11)   | 16.66)   | 0.12)   |        | 1.17)    | 0.67)    | -0.60)  |        |
|                 | 8.50     | 8.50     | 0.00    |        |   |   |   |   | 63.24    | 41.99    | -1.40   |        | 1.08     | 0.71     | -1.43   |        |
| Niger           | (7.01,   | (7.58,   | (0.00,  | 0.001  | — | — | — | — | (58.93,  | (39.85,  | (-1.59, | <0.001 | (0.58,   | (0.46,   | (-1.67, | <0.001 |
|                 | 10.24)   | 9.51)    | 0.00)*  |        |   |   |   |   | 67.82)   | 44.22)   | -1.22)  |        | 1.87)    | 1.07)    | -1.20)  |        |
|                 | 9.37     | 9.37     | 0.00    |        |   |   |   |   | 57.75    | 29.59    | -2.32   |        | 0.99     | 0.50     | -2.39   |        |
| Nigeria         | (8.90,   | (9.08,   | (0.00,  | <0.001 | — | — | — | — | (56.52,  | (29.05,  | (-2.49, | <0.001 | (0.83,   | (0.43,   | (-2.66, | <0.001 |
|                 | 9.87)    | 9.67)    | 0.00)*  |        |   |   |   |   | 58.99)   | 30.13)   | -2.15)  |        | 1.16)    | 0.57)    | -2.12)  |        |
|                 | 8.12     | 8.12     | 0.00    |        |   |   |   |   | 47.39    | 39.80    | -0.60   |        | 0.81     | 0.67     | -0.65   |        |
| Niue            | (0.00,   | (0.00,   | (0.00,  | 0.005  | — | — | — | — | (0.00,   | (0.00,   | (-0.75, | <0.001 | (0.00,   | (0.00,   | (-0.82, | <0.001 |
|                 | 1056.00) | 1477.56) | 0.00)*  |        |   |   |   |   | 1134.46) | 1538.63) | -0.44)  |        | 1041.43) | 1462.79) | -0.48)  |        |
|                 | )        | )        | )       |        |   |   |   |   | )        | )        | )       |        | )        | )        | )       |        |
|                 | 7.62     | 7.62     | 0.00    |        |   |   |   |   | 54.50    | 35.86    | -1.41   |        | 0.91     | 0.60     | -1.40   |        |
| North Macedonia | (5.15,   | (5.06,   | (0.00,  | <0.001 | — | — | — | — | (47.49,  | (30.08,  | (-1.65, | <0.001 | (0.23,   | (0.09,   | (-1.71, | <0.001 |

|                  |         |         |         |        |   |   |   |   |         |         |         |        |         |         |         |        |
|------------------|---------|---------|---------|--------|---|---|---|---|---------|---------|---------|--------|---------|---------|---------|--------|
|                  | 10.88)  | 11.17)  | 0.00)*  |        |   |   |   |   | 62.26)  | 42.57)  | -1.16)  |        | 2.45)   | 2.28)   | -1.09)  |        |
| Northern Mariana | 8.12    | 8.12    | 0.00    |        |   |   |   |   | 62.14   | 37.18   | -1.52   |        | 1.09    | 0.63    | -1.57   |        |
| Islands          | (0.17,  | (0.00,  | (0.00,  | <0.001 | — | — | — | — | (25.06, | (3.96,  | (-2.32, | <0.001 | (0.00,  | (0.00,  | (-2.40, | <0.001 |
|                  | 51.24)  | 111.38) | 0.00)*  |        |   |   |   |   | 130.02) | 157.75) | -0.72)  |        | 39.06)  | 99.77)  | -0.74)  |        |
| Norway           | 8.39    | 8.39    | 0.02    |        |   |   |   |   | 23.43   | 13.87   | -1.84   |        | 0.36    | 0.20    | -2.05   |        |
|                  | (6.49,  | (6.57,  | (0.02,  | <0.001 | — | — | — | — | (20.15, | (11.48, | (-2.65, | <0.001 | (0.07,  | (0.02,  | (-2.87, | <0.001 |
|                  | 10.70)  | 10.60)  | 0.02)   |        |   |   |   |   | 27.10)  | 16.64)  | -1.02)  |        | 1.12)   | 0.85)   | -1.22)  |        |
| Oman             | 6.97    | 6.97    | 0.00    |        |   |   |   |   | 20.99   | 19.20   | -0.14   |        | 0.34    | 0.31    | -0.19   |        |
|                  | (4.22,  | (5.23,  | (-0.00, | 1.000  | — | — | — | — | (15.98, | (16.21, | (-0.87, | 0.702  | (0.01,  | (0.05,  | (-1.07, | 0.678  |
|                  | 10.94)  | 9.15)   | 0.00)   |        |   |   |   |   | 27.18)  | 22.62)  | 0.59)   |        | 2.17)   | 1.12)   | 0.70)   |        |
| Pakistan         | 9.37    | 9.37    | 0.00    |        |   |   |   |   | 6.68    | 7.68    | 0.49    |        | 0.11    | 0.13    | 0.48    |        |
|                  | (8.93,  | (9.08,  | (0.00,  | <0.001 | — | — | — | — | (6.30,  | (7.42,  | (0.40,  | <0.001 | (0.07,  | (0.10,  | (0.35,  | <0.001 |
|                  | 9.83)   | 9.67)   | 0.00)*  |        |   |   |   |   | 7.08)   | 7.96)   | 0.57)   |        | 0.18)   | 0.17)   | 0.61)   |        |
| Palau            | 8.12    | 8.12    | 0.00    |        |   |   |   |   | 15.50   | 13.06   | -0.60   |        | 0.27    | 0.22    | -0.75   |        |
|                  | (0.00,  | (0.00,  | (0.00,  | <0.001 | — | — | — | — | (0.02,  | (0.00,  | (-0.66, | <0.001 | (0.00,  | (0.00,  | (-1.03, | <0.001 |
|                  | 136.37) | 185.27) | 0.00)*  |        |   |   |   |   | 150.37) | 193.57) | -0.55)  |        | 121.35) | 170.61) | -0.47)  |        |
| Palestine        | 6.97    | 6.97    | 0.00    |        |   |   |   |   | 30.94   | 16.55   | -2.14   |        | 0.50    | 0.26    | -2.28   |        |
|                  | (4.43,  | (5.41,  | (0.00,  | 0.019  | — | — | — | — | (25.26, | (14.10, | (-2.41, | <0.001 | (0.04,  | (0.04,  | (-2.47, | <0.001 |
|                  | 10.60)  | 8.86)   | 0.00)*  |        |   |   |   |   | 37.65)  | 19.33)  | -1.87)  |        | 2.32)   | 0.89)   | -2.08)  |        |
| Panama           | 7.67    | 7.67    | 0.00    |        |   |   |   |   | 24.45   | 32.01   | 0.92    |        | 0.40    | 0.53    | 0.96    |        |
|                  | (5.40,  | (5.86,  | (0.00,  | <0.001 | — | — | — | — | (20.22, | (28.18, | (0.15,  | 0.019  | (0.04,  | (0.15,  | (0.06,  | 0.038  |
|                  | 10.63)  | 9.87)   | 0.00)*  |        |   |   |   |   | 29.36)  | 36.23)  | 1.70)   |        | 1.59)   | 1.34)   | 1.87)   |        |
| Papua New Guinea | 8.12    | 8.12    | 0.00    |        |   |   |   |   | 33.26   | 37.67   | 0.47    |        | 0.57    | 0.64    | 0.44    |        |
|                  | (6.23,  | (6.91,  | (0.00,  | <0.001 | — | — | — | — | (29.17, | (34.99, | (0.33,  | <0.001 | (0.16,  | (0.34,  | (0.29,  | <0.001 |
|                  | 10.44)  | 9.48)   | 0.00)*  |        |   |   |   |   | 37.78)  | 40.51)  | 0.61)   |        | 1.51)   | 1.12)   | 0.59)   |        |
| Paraguay         | 7.67    | 7.67    | 0.00    |        |   |   |   |   | 28.19   | 14.61   | -2.22   |        | 0.47    | 0.24    | -2.26   |        |
|                  | (5.82,  | (6.31,  | (0.00,  | <0.001 | — | — | — | — | (24.47, | (12.70, | (-2.61, | <0.001 | (0.11,  | (0.06,  | (-2.69, | <0.001 |
|                  | 9.96)   | 9.24)   | 0.00)*  |        |   |   |   |   | 32.35)  | 16.73)  | -1.83)  |        | 1.34)   | 0.67)   | -1.83)  |        |
| Peru             | 7.54    | 7.54    | 0.00    |        |   |   |   |   | 20.30   | 11.97   | -1.85   |        | 0.33    | 0.19    | -1.88   |        |
|                  | (6.74,  | (6.90,  | (0.00,  | 0.001  | — | — | — | — | (18.98, | (11.15, | (-2.57, | <0.001 | (0.18,  | (0.10,  | (-2.94, | 0.001  |
|                  | 8.42)   | 8.23)   | 0.00)*  |        |   |   |   |   | 21.70)  | 12.82)  | -1.13)  |        | 0.56)   | 0.33)   | -0.81)  |        |
| Philippines      | 8.38    | 8.21    | -0.07   |        |   |   |   |   | 8.58    | 33.10   | 4.87    |        | 0.14    | 0.55    | 5.06    |        |
|                  | (7.88,  | (7.84,  | (-0.07, | <0.001 | — | — | — | — | (8.05,  | (32.35, | (4.28,  | <0.001 | (0.08,  | (0.46,  | (4.54,  | <0.001 |

|                          |        |        |         |        |   |   |   |   |          |          |         |        |        |        |         |        |
|--------------------------|--------|--------|---------|--------|---|---|---|---|----------|----------|---------|--------|--------|--------|---------|--------|
|                          | 8.91)  | 8.60)  | -0.07)  |        |   |   |   |   | 9.12)    | 33.88)   | 5.46)   |        | 0.23)  | 0.66)  | 5.59)   |        |
|                          | 7.81)  | 7.81)  | -0.01)  |        |   |   |   |   | 29.15)   | 18.07)   | -1.74)  |        | 0.48)  | 0.29)  | -1.80)  |        |
| Poland                   | (7.17, | (7.12, | (-0.03, | 0.016  | — | — | — | — | (27.92,  | (17.04,  | (-2.33, | <0.001 | (0.34, | (0.18, | (-2.49, | <0.001 |
|                          | 8.49)  | 8.56)  | -0.00)  |        |   |   |   |   | 30.42)   | 19.17)   | -1.15)  |        | 0.67)  | 0.47)  | -1.11)  |        |
|                          | 7.43)  | 7.43)  | 0.00)   |        |   |   |   |   | 17.65)   | 6.29)    | -3.46)  |        | 0.27)  | 0.09)  | -3.60)  |        |
| Portugal                 | (6.26, | (6.13, | (0.00,  | 1.000  | — | — | — | — | (15.81,  | (5.10,   | (-4.59, | <0.001 | (0.09, | (0.01, | (-5.19, | <0.001 |
|                          | 8.77)  | 8.95)  | 0.00)   |        |   |   |   |   | 19.64)   | 7.69)    | -2.32)  |        | 0.63)  | 0.44)  | -2.00)  |        |
|                          | 7.67)  | 7.67)  | 0.00)   |        |   |   |   |   | 42.64)   | 15.49)   | -3.58)  |        | 0.69)  | 0.24)  | -3.68)  |        |
| Puerto Rico              | (5.79, | (5.58, | (0.00,  | <0.001 | — | — | — | — | (38.03,  | (12.46,  | (-4.21, | <0.001 | (0.22, | (0.02, | (-4.44, | <0.001 |
|                          | 9.97)  | 10.31) | 0.00)*  |        |   |   |   |   | 47.67)   | 19.07)   | -2.93)  |        | 1.61)  | 1.13)  | -2.92)  |        |
|                          | 6.97)  | 6.97)  | 0.00)   |        |   |   |   |   | 32.75)   | 13.91)   | -2.92)  |        | 0.53)  | 0.21)  | -3.11)  |        |
| Qatar                    | (2.12, | (4.38, | (0.00,  | 0.037  | — | — | — | — | (20.62,  | (10.21,  | (-3.21, | <0.001 | (0.00, | (0.00, | (-3.46, | <0.001 |
|                          | 17.66) | 10.84) | 0.00)*  |        |   |   |   |   | 50.07)   | 18.83)   | -2.64)  |        | 7.93)  | 2.20)  | -2.75)  |        |
|                          | 8.60)  | 8.60)  | 0.00)   |        |   |   |   |   | 26.68)   | 12.81)   | -2.49)  |        | 0.41)  | 0.19)  | -2.62)  |        |
| Republic of Korea        | (8.04, | (7.97, | (0.00,  | 0.063  | — | — | — | — | (25.69,  | (12.03,  | (-2.90, | <0.001 | (0.30, | (0.11, | (-3.21, | <0.001 |
|                          | 9.19)  | 9.28)  | 0.00)   |        |   |   |   |   | 27.70)   | 13.62)   | -2.09)  |        | 0.56)  | 0.32)  | -2.03)  |        |
|                          | 8.61)  | 8.61)  | 0.00)   |        |   |   |   |   | 28.50)   | 39.45)   | 1.01)   |        | 0.48)  | 0.67)  | 1.01)   |        |
| Republic of<br>Moldova   | (6.79, | (6.46, | (0.00,  | <0.001 | — | — | — | — | (25.13,  | (34.84,  | (-0.34, | 0.144  | (0.14, | (0.20, | (-0.33, | 0.141  |
|                          | 10.81) | 11.35) | 0.00)*  |        |   |   |   |   | 32.22)   | 44.59)   | 2.37)   |        | 1.23)  | 1.80)  | 2.38)   |        |
|                          | 7.23)  | 7.23)  | -0.01)  |        |   |   |   |   | 62.35)   | 40.89)   | -1.39)  |        | 1.06)  | 0.70)  | -1.37)  |        |
| Romania                  | (6.44, | (6.25, | (-0.01, | <0.001 | — | — | — | — | (60.02,  | (38.59,  | (-1.90, | <0.001 | (0.78, | (0.43, | (-1.87, | <0.001 |
|                          | 8.09)  | 8.32)  | -0.01)  |        |   |   |   |   | 64.76)   | 43.30)   | -0.88)  |        | 1.43)  | 1.08)  | -0.87)  |        |
|                          | 9.67)  | 9.67)  | 0.00)   |        |   |   |   |   | 139.91)  | 333.46)  | 3.12)   |        | 2.43)  | 5.92)  | 3.22)   |        |
| Russian Federation       | (9.31, | (9.27, | (0.00,  | <0.001 | — | — | — | — | (138.59, | (331.32, | (1.94,  | <0.001 | (2.26, | (5.64, | (2.01,  | <0.001 |
|                          | 10.04) | 10.08) | 0.00)*  |        |   |   |   |   | 141.24)  | 335.62)  | 4.32)   |        | 2.61)  | 6.22)  | 4.44)   |        |
|                          | 8.50)  | 8.50)  | 0.00)   |        |   |   |   |   | 38.48)   | 21.05)   | -2.04)  |        | 0.66)  | 0.36)  | -2.08)  |        |
| Rwanda                   | (7.00, | (7.43, | (0.00,  | <0.001 | — | — | — | — | (35.09,  | (19.31,  | (-2.29, | <0.001 | (0.29, | (0.16, | (-2.30, | <0.001 |
|                          | 10.25) | 9.69)  | 0.00)*  |        |   |   |   |   | 42.12)   | 22.91)   | -1.78)  |        | 1.33)  | 0.68)  | -1.86)  |        |
|                          | 7.67)  | 7.67)  | 0.00)   |        |   |   |   |   | 156.35)  | 41.74)   | -4.43)  |        | 2.67)  | 0.68)  | -4.61)  |        |
| Saint Kitts and<br>Nevis | (0.04, | (0.12, | (0.00,  | 1.000  | — | — | — | — | (83.33,  | (13.09,  | (-4.80, | <0.001 | (0.00, | (0.00, | (-5.01, | <0.001 |
|                          | 64.20) | 50.07) | 0.00)   |        |   |   |   |   | 269.95)  | 101.50)  | -4.06)  |        | 55.54) | 37.63) | -4.21)  |        |
|                          | 7.67)  | 7.67)  | 0.00)   |        |   |   |   |   | 72.86)   | 53.46)   | -1.02)  |        | 1.23)  | 0.90)  | -1.05)  |        |
| Saint Lucia              | (0.97, | (1.33, | (0.00,  | <0.001 | — | — | — | — | (43.61,  | (31.84,  | (-1.79, | 0.010  | (0.00, | (0.00, | (-1.83, | 0.008  |

|                                  |         |        |         |        |   |   |   |   |         |         |         |        |        |        |         |        |
|----------------------------------|---------|--------|---------|--------|---|---|---|---|---------|---------|---------|--------|--------|--------|---------|--------|
|                                  | 30.31)  | 24.95) | 0.00)*  |        |   |   |   |   | 115.85) | 84.79)  | -0.25)  |        | 20.31) | 13.90) | -0.27)  |        |
|                                  | 7.67    | 7.67   | 0.00    |        |   |   |   |   | 35.73   | 35.58   | 0.03    |        | 0.59   | 0.59   | 0.06    |        |
| Saint Vincent and the Grenadines | (0.63,  | (0.62, | (0.00,  | <0.001 | — | — | — | — | (14.80, | (14.73, | (-0.53, | 0.910  | (0.00, | (0.00, | (-0.52, | 0.834  |
|                                  | 36.04)  | 32.04) | 0.00)*  |        |   |   |   |   | 75.38)  | 72.26)  | 0.60)   |        | 24.85) | 19.53) | 0.64)   |        |
|                                  | 8.12    | 8.12   | 0.00    |        |   |   |   |   | 49.45   | 52.92   | 0.24    |        | 0.86   | 0.91   | 0.20    |        |
| Samoa                            | (1.23,  | (1.76, | (0.00,  | 1.000  | — | — | — | — | (26.15, | (31.98, | (0.18,  | <0.001 | (0.00, | (0.00, | (0.08,  | 0.001  |
|                                  | 29.86)  | 24.45) | 0.00)   |        |   |   |   |   | 86.24)  | 83.00)  | 0.30)   |        | 18.69) | 13.28) | 0.32)   |        |
|                                  | 7.43    | 7.43   | 0.00    |        |   |   |   |   | 14.15   | 12.40   | -0.46   |        | 0.21   | 0.19   | -0.34   |        |
| San Marino                       | (0.00,  | (0.00, | (0.00,  | <0.001 | — | — | — | — | (0.05,  | (0.06,  | (-0.51, | <0.001 | (0.00, | (0.00, | (-0.71, | 0.076  |
|                                  | 107.21) | 92.56) | 0.00)*  |        |   |   |   |   | 119.22) | 101.16) | -0.40)  |        | 93.71) | 79.31) | 0.04)   |        |
|                                  | 8.50    | 8.50   | 0.00    |        |   |   |   |   | 57.12   | 45.94   | -0.50   |        | 0.98   | 0.78   | -0.56   |        |
| Sao Tome and Principe            | (0.76,  | (2.08, | (0.00,  | 0.001  | — | — | — | — | (27.81, | (27.44, | (-1.40, | 0.284  | (0.00, | (0.00, | (-1.49, | 0.239  |
|                                  | 38.79)  | 23.67) | 0.00)*  |        |   |   |   |   | 106.33) | 72.54)  | 0.41)   |        | 27.08) | 11.55) | 0.38)   |        |
|                                  | 6.97    | 6.97   | 0.00    |        |   |   |   |   | 80.45   | 36.21   | -2.76   |        | 1.33   | 0.59   | -2.83   |        |
| Saudi Arabia                     | (5.99,  | (6.38, | (0.00,  | <0.001 | — | — | — | — | (77.02, | (34.87, | (-2.91, | <0.001 | (0.92, | (0.43, | (-3.00, | <0.001 |
|                                  | 8.07)   | 7.60)  | 0.00)*  |        |   |   |   |   | 84.01)  | 37.60)  | -2.62)  |        | 1.88)  | 0.79)  | -2.66)  |        |
|                                  | 8.50    | 8.50   | 0.00    |        |   |   |   |   | 46.30   | 32.42   | -1.16   |        | 0.78   | 0.54   | -1.21   |        |
| Senegal                          | (7.01,  | (7.48, | (0.00,  | <0.001 | — | — | — | — | (42.64, | (30.37, | (-1.49, | <0.001 | (0.37, | (0.31, | (-1.54, | <0.001 |
|                                  | 10.24)  | 9.63)  | 0.00)*  |        |   |   |   |   | 50.21)  | 34.58)  | -0.83)  |        | 1.48)  | 0.90)  | -0.88)  |        |
|                                  | 7.33    | 7.33   | -0.01   |        |   |   |   |   | 43.75   | 25.47   | -1.85   |        | 0.73   | 0.43   | -1.77   |        |
| Serbia                           | (6.10,  | (5.97, | (-0.01, | <0.001 | — | — | — | — | (40.68, | (22.92, | (-2.23, | <0.001 | (0.38, | (0.16, | (-2.18, | <0.001 |
|                                  | 8.75)   | 8.92)  | -0.01)  |        |   |   |   |   | 47.00)  | 28.25)  | -1.47)  |        | 1.27)  | 0.95)  | -1.35)  |        |
|                                  | 7.48    | 7.48   | 0.00    |        |   |   |   |   | 82.00   | 55.25   | -1.34   |        | 1.38   | 0.92   | -1.36   |        |
| Seychelles                       | (0.25,  | (0.38, | (0.00,  | <0.001 | — | — | — | — | (41.49, | (26.20, | (-1.56, | <0.001 | (0.00, | (0.00, | (-1.61, | <0.001 |
|                                  | 47.31)  | 36.98) | 0.00)*  |        |   |   |   |   | 149.53) | 103.76) | -1.12)  |        | 37.83) | 25.57) | -1.12)  |        |
|                                  | 8.50    | 8.50   | 0.00    |        |   |   |   |   | 52.45   | 45.80   | -0.47   |        | 0.89   | 0.77   | -0.47   |        |
| Sierra Leone                     | (6.48,  | (7.17, | (0.00,  | <0.001 | — | — | — | — | (47.14, | (42.59, | (-0.88, | 0.026  | (0.33, | (0.41, | (-0.67, | <0.001 |
|                                  | 11.00)  | 10.02) | 0.00)*  |        |   |   |   |   | 58.23)  | 49.20)  | -0.06)  |        | 2.00)  | 1.36)  | -0.27)  |        |
|                                  | 8.60    | 8.60   | 0.00    |        |   |   |   |   | 87.02   | 32.26   | -3.60   |        | 1.41   | 0.50   | -3.80   |        |
| Singapore                        | (6.61,  | (6.81, | (0.00,  | <0.001 | — | — | — | — | (80.44, | (28.75, | (-4.10, | <0.001 | (0.69, | (0.16, | (-4.31, | <0.001 |
|                                  | 11.06)  | 10.83) | 0.00)*  |        |   |   |   |   | 94.04)  | 36.17)  | -3.08)  |        | 2.62)  | 1.37)  | -3.29)  |        |
|                                  | 8.13    | 8.13   | -0.01   |        |   |   |   |   | 43.04   | 26.93   | -1.64   |        | 0.72   | 0.44   | -1.72   |        |
| Slovakia                         | (6.47,  | (6.32, | (-0.06, | 0.551  | — | — | — | — | (39.13, | (23.59, | (-2.23, | <0.001 | (0.30, | (0.12, | (-2.35, | <0.001 |

|                 |        |        |         |        |         |   |   |   |         |         |         |        |        |        |         |        |
|-----------------|--------|--------|---------|--------|---------|---|---|---|---------|---------|---------|--------|--------|--------|---------|--------|
|                 | 10.11) | 10.37) | 0.03)   |        |         |   |   |   | 47.25)  | 30.67)  | -1.05)  |        | 1.48)  | 1.27)  | -1.08)  |        |
|                 | 7.47   | 7.47   | -0.00   |        |         |   |   |   | 42.17   | 7.44    | -5.77   |        | 0.72   | 0.12   | -6.15   |        |
| Slovenia        | (4.97, | (4.60, | (-0.02, | 0.898  | —       | — | — | — | (36.02, | (4.65,  | (-6.34, | <0.001 | (0.14, | (0.00, | (-6.88, | <0.001 |
|                 | 10.85) | 11.65) | 0.01)   |        |         |   |   |   | 49.14)  | 11.52)  | -5.20)  |        | 2.30)  | 2.00)  | -5.41)  |        |
|                 | 8.12   | 8.12   | 0.00    |        |         |   |   |   | 49.45   | 53.63   | 0.27    |        | 0.86   | 0.93   | 0.24    |        |
| Solomon Islands | (2.51, | (3.97, | (0.00,  | <0.001 | —       | — | — | — | (32.05, | (41.52, | (0.08,  | 0.005  | (0.00, | (0.03, | (0.03,  | 0.024  |
|                 | 20.87) | 14.90) | 0.00)*  |        |         |   |   |   | 73.55)  | 68.26)  | 0.46)   |        | 10.39) | 4.88)  | 0.44)   |        |
|                 | 8.50   | 8.50   | 0.00    |        |         |   |   |   | 27.93   | 21.40   | -0.91   |        | 0.48   | 0.36   | -0.99   |        |
| Somalia         | (6.93, | (7.56, | (0.00,  | <0.001 | —       | — | — | — | (25.00, | (19.85, | (-1.04, | <0.001 | (0.17, | (0.19, | (-1.15, | <0.001 |
|                 | 10.33) | 9.53)  | 0.00)*  |        |         |   |   |   | 31.12)  | 23.05)  | -0.78)  |        | 1.08)  | 0.65)  | -0.84)  |        |
|                 | 9.37   | 9.37   | 0.00    |        |         |   |   |   | 88.59   | 45.17   | -2.24   |        | 1.49   | 0.76   | -2.25   |        |
| South Africa    | (8.70, | (8.83, | (0.00,  | <0.001 | —       | — | — | — | (86.49, | (43.97, | (-3.31, | <0.001 | (1.23, | (0.61, | (-3.35, | <0.001 |
|                 | 10.08) | 9.94)  | 0.00)*  |        |         |   |   |   | 90.72)  | 46.38)  | -1.15)  |        | 1.80)  | 0.93)  | -1.14)  |        |
|                 | 8.50   | 8.50   | 0.00    |        |         |   |   |   | 20.81   | 15.07   | -1.13   |        | 0.36   | 0.25   | -1.25   |        |
| South Sudan     | (6.78, | (7.15, | (0.00,  | <0.001 | —       | — | — | — | (17.93, | (13.22, | (-1.52, | <0.001 | (0.08, | (0.07, | (-1.72, | <0.001 |
|                 | 10.57) | 10.04) | 0.00)*  |        |         |   |   |   | 24.05)  | 17.12)  | -0.74)  |        | 1.08)  | 0.67)  | -0.79)  |        |
|                 | 7.43   | 7.43   | 0.00    |        |         |   |   |   | 26.25   | 9.99    | -3.33   |        | 0.41   | 0.15   | -3.43   |        |
| Spain           | (6.82, | (6.78, | (0.00,  | <0.001 | —       | — | — | — | (25.09, | (9.23,  | (-3.67, | <0.001 | (0.27, | (0.07, | (-3.92, | <0.001 |
|                 | 8.09)  | 8.14)  | 0.00)*  |        |         |   |   |   | 27.45)  | 10.80)  | -2.99)  |        | 0.59)  | 0.28)  | -2.94)  |        |
|                 | 7.48   | 7.48   | 0.00    |        |         |   |   |   | 94.49   | 43.67   | -2.57   |        | 1.58   | 0.72   | -2.60   |        |
| Sri Lanka       | (6.62, | (6.67, | (0.00,  | <0.001 | —       | — | — | — | (91.34, | (41.69, | (-3.04, | <0.001 | (1.19, | (0.48, | (-3.13, | <0.001 |
|                 | 8.42)  | 8.36)  | 0.00)*  |        |         |   |   |   | 97.71)  | 45.72)  | -2.10)  |        | 2.05)  | 1.03)  | -2.07)  |        |
|                 | 6.97   | 6.97   | 0.00    |        |         |   |   |   | 31.79   | 20.77   | -1.46   |        | 0.52   | 0.34   | -1.49   |        |
| Sudan           | (6.14, | (6.42, | (0.00,  | 1.000  | —       | — | — | — | (30.00, | (19.82, | (-1.52, | <0.001 | (0.31, | (0.22, | (-1.63, | <0.001 |
|                 | 7.88)  | 7.55)  | 0.00)   |        |         |   |   |   | 33.66)  | 21.76)  | -1.39)  |        | 0.82)  | 0.49)  | -1.34)  |        |
|                 | 7.67   | 7.67   | 0.00    |        |         |   |   |   | 60.70   | 57.13   | -0.12   |        | 1.01   | 0.95   | -0.11   |        |
| Suriname        | (2.72, | (3.38, | (0.00,  | <0.001 | —       | — | — | — | (44.12, | (43.81, | (-1.31, | 0.843  | (0.01, | (0.03, | (-1.35, | 0.863  |
|                 | 17.79) | 14.99) | 0.00)*  |        |         |   |   |   | 81.92)  | 73.28)  | 1.08)   |        | 8.11)  | 5.29)  | 1.15)   |        |
|                 | 8.94   | 8.68   | -0.12   |        | 23.20   |   |   |   | 38.76   | 19.78   | -2.10   |        | 0.56   | 0.28   | -2.29   |        |
| Sweden          | (7.46, | (7.27, | (-0.18, | <0.001 | (20.77, | — | — | — | (35.62, | (17.62, | (-2.95, | <0.001 | (0.24, | (0.08, | (-3.14, | <0.001 |
|                 | 10.64) | 10.30) | -0.06)  |        | 25.85)  |   |   |   | 42.12)  | 22.15)  | -1.24)  |        | 1.12)  | 0.73)  | -1.44)  |        |
|                 | 6.04   | 6.04   | 0.00    |        |         |   |   |   | 31.21   | 11.70   | -3.30   |        | 0.49   | 0.18   | -3.34   |        |
| Switzerland     | (4.76, | (4.79, | (-0.00, | 0.713  | —       | — | — | — | (28.18, | (9.94,  | (-3.64, | <0.001 | (0.18, | (0.03, | (-3.70, | <0.001 |

|                            |         |         |         |        |   |   |   |   |          |          |         |        |         |         |         |        |
|----------------------------|---------|---------|---------|--------|---|---|---|---|----------|----------|---------|--------|---------|---------|---------|--------|
|                            | 7.59)   | 7.55)   | 0.01)   |        |   |   |   |   | 34.49)   | 13.72)   | -2.96)  |        | 1.11)   | 0.66)   | -2.97)  |        |
| Syrian Arab Republic       | 6.97    | 6.97    | 0.00    |        |   |   |   |   | 28.96    | 18.52    | -1.56   |        | 0.47    | 0.30    | -1.56   |        |
|                            | (5.89,  | (5.99,  | (0.00,  | 0.198  | — | — | — | — | (26.72,  | (16.93,  | (-1.84, | <0.001 | (0.22,  | (0.13,  | (-2.00, | <0.001 |
|                            | 8.21)   | 8.07)   | 0.00)   |        |   |   |   |   | 31.34)   | 20.23)   | -1.29)  |        | 0.90)   | 0.62)   | -1.11)  |        |
| Taiwan (Province of China) | 7.70    | 6.92    | -0.38   |        |   |   |   |   | 23.72    | 18.29    | -0.97   |        | 0.36    | 0.29    | -0.85   |        |
|                            | (6.91,  | (6.09,  | (-0.38, | <0.001 | — | — | — | — | (22.32,  | (16.98,  | (-1.46, | <0.001 | (0.21,  | (0.14,  | (-1.38, | 0.002  |
|                            | 8.56)   | 7.84)   | -0.38)  |        |   |   |   |   | 25.19)   | 19.70)   | -0.48)  |        | 0.59)   | 0.53)   | -0.31)  |        |
|                            | 8.83    | 8.83    | 0.00    |        |   |   |   |   | 15.52    | 16.58    | 0.30    |        | 0.27    | 0.29    | 0.39    |        |
| Tajikistan                 | (7.08,  | (7.57,  | (0.00,  | <0.001 | — | — | — | — | (13.07,  | (14.81,  | (0.05,  | 0.019  | (0.04,  | (0.10,  | (0.05,  | 0.023  |
|                            | 10.93)  | 10.26)  | 0.00)*  |        |   |   |   |   | 18.32)   | 18.51)   | 0.55)   |        | 0.94)   | 0.66)   | 0.73)   |        |
|                            | 7.48    | 7.48    | 0.00    |        |   |   |   |   | 12.03    | 7.21     | -1.66   |        | 0.20    | 0.11    | -1.87   |        |
| Thailand                   | (7.01,  | (7.00,  | (0.00,  | <0.001 | — | — | — | — | (11.44,  | (6.74,   | (-2.51, | <0.001 | (0.13,  | (0.06,  | (-3.26, | 0.009  |
|                            | 7.97)   | 7.99)   | 0.00)*  |        |   |   |   |   | 12.65)   | 7.70)    | -0.80)  |        | 0.29)   | 0.19)   | -0.46)  |        |
|                            | 7.48    | 7.48    | 0.00    |        |   |   |   |   | 12.97    | 22.06    | 2.08    |        | 0.22    | 0.37    | 2.07    |        |
| Timor-Leste                | (3.77,  | (4.47,  | (0.00,  | <0.001 | — | — | — | — | (7.77,   | (16.43,  | (1.26,  | <0.001 | (0.00,  | (0.00,  | (1.15,  | <0.001 |
|                            | 13.56)  | 12.00)  | 0.00)*  |        |   |   |   |   | 20.52)   | 29.18)   | 2.90)   |        | 3.43)   | 2.71)   | 2.99)   |        |
|                            | 8.50    | 8.50    | 0.00    |        |   |   |   |   | 61.47    | 41.62    | -1.37   |        | 1.04    | 0.70    | -1.38   |        |
| Togo                       | (6.45,  | (7.15,  | (0.00,  | <0.001 | — | — | — | — | (55.59,  | (38.54,  | (-1.64, | <0.001 | (0.41,  | (0.35,  | (-1.62, | <0.001 |
|                            | 11.05)  | 10.04)  | 0.00)*  |        |   |   |   |   | 67.84)   | 44.89)   | -1.09)  |        | 2.25)   | 1.25)   | -1.15)  |        |
|                            | 8.12    | 8.12    | 0.00    |        |   |   |   |   | 59.76    | 54.54    | -0.32   |        | 1.04    | 0.93    | -0.37   |        |
| Tokelau                    | (0.00,  | (0.00,  | (0.00,  | <0.001 | — | — | — | — | (0.00,   | (0.00,   | (-0.35, | <0.001 | (0.00,  | (0.00,  | (-0.43, | <0.001 |
|                            | 1718.36 | 2321.71 | 0.00)*  |        |   |   |   |   | 1805.73) | 2407.95) | -0.29)  |        | 1705.87 | 2309.83 | -0.30)  |        |
|                            | )       | )       | 0.00)*  |        |   |   |   |   |          |          |         |        | )       | )       |         |        |
|                            | 8.12    | 8.12    | 0.00    |        |   |   |   |   | 6.13     | 5.72     | -0.23   |        | 0.10    | 0.09    | -0.35   |        |
| Tonga                      | (0.48,  | (0.64,  | (0.00,  | 0.001  | — | — | — | — | (0.13,   | (0.18,   | (-0.33, | <0.001 | (0.00,  | (0.00,  | (-0.35, | <0.001 |
|                            | 41.76)  | 35.26)  | 0.00)*  |        |   |   |   |   | 39.19)   | 31.50)   | -0.12)  |        | 28.79)  | 21.34)  | -0.35)  |        |
|                            | 7.67    | 7.67    | 0.00    |        |   |   |   |   | 76.85    | 52.51    | -1.34   |        | 1.27    | 0.87    | -1.35   |        |
| Trinidad and Tobago        | (4.61,  | (4.63,  | (0.00,  | <0.001 | — | — | — | — | (66.28,  | (43.97,  | (-1.97, | <0.001 | (0.27,  | (0.12,  | (-2.01, | <0.001 |
|                            | 12.07)  | 12.10)  | 0.00)*  |        |   |   |   |   | 88.69)   | 62.35)   | -0.72)  |        | 3.76)   | 3.22)   | -0.69)  |        |
|                            | 6.97    | 6.97    | 0.00    |        |   |   |   |   | 21.18    | 14.34    | -1.33   |        | 0.34    | 0.23    | -1.37   |        |
| Tunisia                    | (5.74,  | (5.92,  | (0.00,  | 0.130  | — | — | — | — | (18.99,  | (12.82,  | (-1.50, | <0.001 | (0.12,  | (0.08,  | (-1.72, | <0.001 |
|                            | 8.39)   | 8.16)   | 0.00)   |        |   |   |   |   | 23.56)   | 16.00)   | -1.17)  |        | 0.81)   | 0.55)   | -1.01)  |        |
|                            | 6.97    | 6.97    | 0.01    | <0.001 | — | — | — | — | 30.48    | 14.03    | -2.61   | <0.001 | 0.47    | 0.21    | -2.75   | <0.001 |
| Turkey                     |         |         |         |        |   |   |   |   |          |          |         |        |         |         |         |        |

|                              |         |         |         |        |         |         |         |       |          |          |         |        |         |         |         |        |
|------------------------------|---------|---------|---------|--------|---------|---------|---------|-------|----------|----------|---------|--------|---------|---------|---------|--------|
|                              | (6.49,  | (6.57,  | (0.01,  |        |         |         |         |       | (29.50,  | (13.46,  | (-2.82, |        | (0.36,  | (0.14,  | (-3.02, |        |
|                              | 7.46)   | 7.38)   | 0.01)*  |        |         |         |         |       | 31.48)   | 14.62)   | -2.41)  |        | 0.62)   | 0.29)   | -2.48)  |        |
|                              | 8.83    | 8.83    |         |        |         |         |         |       | 344.73   | 375.68   | 0.30    |        | 5.85    | 6.27    | 0.25    |        |
| Turkmenistan                 | (6.83,  | (7.04,  | —       | —      | —       | —       | —       | —     | (331.39, | (363.50, | (-0.45, | 0.440  | (4.21,  | (4.79,  | (-0.53, | 0.534  |
|                              | 11.29)  | 10.95)  |         |        |         |         |         |       | 358.51)  | 388.18)  | 1.05)   |        | 7.94)   | 8.08)   | 1.03)   |        |
|                              | 8.12    | 8.12    | 0.00    |        |         |         |         |       | 60.12    | 58.27    | -0.11   |        | 1.04    | 1.00    | -0.14   |        |
| Tuvalu                       | (0.00,  | (0.00,  | (0.00,  | <0.001 | —       | —       | —       | —     | (2.28,   | (2.64,   | (-0.14, | <0.001 | (0.00,  | (0.00,  | (-0.20, | <0.001 |
|                              | 219.79) | 210.83) | 0.00)*  |        |         |         |         |       | 312.94)  | 298.34)  | -0.08)  |        | 205.79) | 197.71) | -0.07)  |        |
|                              | 8.50    | 8.50    | 0.00    |        |         |         |         |       | 19.74    | 19.10    | -0.16   |        | 0.34    | 0.32    | -0.16   |        |
| Uganda                       | (7.48,  | (7.86,  | (0.00,  | <0.001 | —       | —       | —       | —     | (18.08,  | (18.09,  | (-0.61, | 0.491  | (0.15,  | (0.20,  | (-0.52, | 0.366  |
|                              | 9.64)   | 9.19)   | 0.00)*  |        |         |         |         |       | 21.53)   | 20.15)   | 0.30)   |        | 0.67)   | 0.49)   | 0.19)   |        |
|                              | 9.67    | 9.67    | 0.00    |        |         |         |         |       | 145.69   | 247.91   | 1.89    |        | 2.56    | 4.39    | 1.92    |        |
| Ukraine                      | (9.05,  | (8.94,  | (0.00,  | <0.001 | —       | —       | —       | —     | (143.36, | (244.54, | (0.17,  | 0.032  | (2.26,  | (3.96,  | (0.17,  | 0.031  |
|                              | 10.31)  | 10.45)  | 0.00)*  |        |         |         |         |       | 148.05)  | 251.32)  | 3.65)   |        | 2.89)   | 4.87)   | 3.70)   |        |
|                              | 6.97    | 6.97    | 0.00    |        |         |         |         |       | 24.49    | 15.77    | -1.51   |        | 0.39    | 0.25    | -1.56   |        |
| United Arab Emirates         | (4.29,  | (5.40,  | (0.00,  | 0.008  | —       | —       | —       | —     | (19.13,  | (13.36,  | (-1.70, | <0.001 | (0.01,  | (0.04,  | (-1.91, | <0.001 |
|                              | 10.80)  | 8.91)   | 0.00)*  |        |         |         |         |       | 30.96)   | 18.54)   | -1.33)  |        | 2.18)   | 0.94)   | -1.21)  |        |
|                              | 8.36    | 7.89    | -0.21   |        |         | 0.04    |         |       | 27.78    | 24.83    | -0.33   |        | 0.43    | 0.39    | -0.31   |        |
| United Kingdom               | (7.82,  | (7.37,  | (-0.25, | <0.001 | —       | (0.01,  | —       | —     | (26.77,  | (23.91,  | (-0.51, | <0.001 | (0.32,  | (0.28,  | (-0.48, | 0.001  |
|                              | 8.94)   | 8.44)   | -0.17)  |        |         | 0.11)   |         |       | 28.81)   | 25.78)   | -0.15)  |        | 0.58)   | 0.53)   | -0.13)  |        |
|                              | 8.50    | 8.50    | 0.00    |        |         |         |         |       | 21.71    | 18.65    | -0.50   |        | 0.37    | 0.32    | -0.45   |        |
| United Republic of Tanzania  | (7.68,  | (7.96,  | (0.00,  | <0.001 | —       | —       | —       | —     | (20.34,  | (17.83,  | (-0.77, | <0.001 | (0.21,  | (0.22,  | (-1.05, | 0.144  |
|                              | 9.39)   | 9.06)   | 0.00)*  |        |         |         |         |       | 23.15)   | 19.50)   | -0.23)  |        | 0.61)   | 0.45)   | 0.15)   |        |
|                              | 8.92    | 8.57    | -0.13   |        | 79.83   | 80.90   | 0.13    |       | 70.80    | 62.46    | -0.41   |        | 1.02    | 0.89    | -0.43   |        |
| United States of America     | (8.66,  | (8.33,  | (-0.27, | 0.083  | (79.07, | (80.16, | (-0.10, | 0.263 | (70.08,  | (61.81,  | (-0.65, | 0.001  | (0.94,  | (0.81,  | (-0.81, | 0.025  |
|                              | 9.18)   | 8.82)   | 0.02)   |        | 80.60)  | 81.65)  | 0.37)   |       | 71.53)   | 63.12)   | -0.18)  |        | 1.11)   | 0.97)   | -0.06)  |        |
|                              | 7.67    | 7.67    | 0.00    |        |         |         |         |       | 64.35    | 33.48    | -2.22   |        | 1.07    | 0.55    | -2.26   |        |
| United States Virgin Islands | (0.62,  | (0.34,  | (0.00,  | <0.001 | —       | —       | —       | —     | (34.64,  | (11.50,  | (-2.43, | <0.001 | (0.00,  | (0.00,  | (-2.52, | <0.001 |
|                              | 32.83)  | 39.54)  | 0.00)*  |        |         |         |         |       | 109.93)  | 77.43)   | -2.00)  |        | 21.50)  | 27.07)  | -2.00)  |        |
|                              | 6.27    | 6.27    | 0.00    |        |         |         |         |       | 52.65    | 20.76    | -3.28   |        | 0.86    | 0.33    | -3.42   |        |
| Uruguay                      | (4.39,  | (4.45,  | (0.00,  | <0.001 | —       | —       | —       | —     | (46.87,  | (17.33,  | (-4.08, | <0.001 | (0.28,  | (0.04,  | (-4.30, | <0.001 |
|                              | 8.69)   | 8.61)   | 0.00)*  |        |         |         |         |       | 58.95)   | 24.69)   | -2.48)  |        | 2.03)   | 1.21)   | -2.52)  |        |
| Uzbekistan                   | 8.83    | 8.83    | —       | —      | —       | —       | —       | —     | 13.57    | 33.00    | 2.91    | <0.001 | 0.23    | 0.55    | 2.89    | <0.001 |



|                                          |                         |                         |                          |        |   |   |   |   |                            |                            |                            |        |                         |                         |                            |        |
|------------------------------------------|-------------------------|-------------------------|--------------------------|--------|---|---|---|---|----------------------------|----------------------------|----------------------------|--------|-------------------------|-------------------------|----------------------------|--------|
|                                          | (7.95,<br>9.79)         | (8.15,<br>9.56)         |                          |        |   |   |   |   | (12.47,<br>14.76)          | (31.68,<br>34.37)          | (1.96,<br>3.87)            |        | (0.10,<br>0.44)         | (0.39,<br>0.75)         | (1.96,<br>3.83)            |        |
|                                          | 8.12                    | 8.12                    | 0.00                     |        |   |   |   |   | 39.07                      | 60.34                      | 1.47                       |        | 0.67                    | 1.04                    | 1.46                       |        |
| Vanuatu                                  | (1.23,<br>28.99)        | (2.56,<br>19.96)        | (0.00,<br>0.00)*         | <0.001 | — | — | — | — | (19.17,<br>71.76)          | (41.82,<br>84.62)          | (1.19,<br>1.74)            | <0.001 | (0.00,<br>17.14)        | (0.00,<br>9.38)         | (1.12,<br>1.81)            | <0.001 |
| Venezuela<br>(Bolivarian<br>Republic of) | 7.67<br>(6.83,<br>8.59) | 7.67<br>(6.96,<br>8.44) | 0.00<br>(0.00,<br>0.00)* | 0.004  | — | — | — | — | 28.16<br>(26.52,<br>29.88) | 17.97<br>(16.86,<br>19.13) | -1.49<br>(-2.36,<br>-0.61) | 0.001  | 0.47<br>(0.28,<br>0.74) | 0.29<br>(0.17,<br>0.47) | -1.62<br>(-2.43,<br>-0.80) | <0.001 |
|                                          | 7.48                    | 7.48                    | 0.00                     |        |   |   |   |   | 21.02                      | 18.81                      | -0.38                      |        | 0.35                    | 0.31                    | -0.40                      |        |
| Viet Nam                                 | (7.04,<br>7.94)         | (7.10,<br>7.88)         | (0.00,<br>0.00)*         | <0.001 | — | — | — | — | (20.26,<br>21.81)          | (18.22,<br>19.41)          | (-0.45,<br>-0.31)          | <0.001 | (0.26,<br>0.47)         | (0.24,<br>0.40)         | (-0.63,<br>-0.17)          | 0.001  |
|                                          | 6.97                    | 6.97                    | 0.00                     |        |   |   |   |   | 18.99                      | 17.38                      | -0.28                      |        | 0.32                    | 0.29                    | -0.27                      |        |
| Yemen                                    | (5.92,<br>8.16)         | (6.33,<br>7.65)         | (0.00,<br>0.00)*         | <0.001 | — | — | — | — | (17.20,<br>20.92)          | (16.37,<br>18.44)          | (-0.62,<br>0.07)           | 0.113  | (0.13,<br>0.67)         | (0.17,<br>0.45)         | (-0.55,<br>0.01)           | 0.055  |
|                                          | 8.50                    | 8.50                    | 0.00                     |        |   |   |   |   | 23.20                      | 20.43                      | -0.45                      |        | 0.40                    | 0.35                    | -0.54                      |        |
| Zambia                                   | (7.02,<br>10.24)        | (7.58,<br>9.51)         | (0.00,<br>0.00)*         | 0.001  | — | — | — | — | (20.59,<br>26.09)          | (18.95,<br>22.01)          | (-0.62,<br>-0.29)          | <0.001 | (0.12,<br>0.99)         | (0.18,<br>0.62)         | (-0.80,<br>-0.28)          | <0.001 |
|                                          | 8.50                    | 8.50                    | 0.00                     |        |   |   |   |   | 32.74                      | 46.76                      | 1.24                       |        | 0.54                    | 0.77                    | 1.24                       |        |
| Zimbabwe                                 | (7.23,<br>9.94)         | (7.51,<br>9.58)         | (0.00,<br>0.00)*         | <0.001 | — | — | — | — | (30.20,<br>35.46)          | (44.40,<br>49.21)          | (0.50,<br>1.99)            | 0.001  | (0.26,<br>1.03)         | (0.50,<br>1.16)         | (0.12,<br>2.38)            | 0.031  |
| <b>Men</b>                               |                         |                         |                          |        |   |   |   |   |                            |                            |                            |        |                         |                         |                            |        |
|                                          | 10.48                   | 10.48                   | 0.00                     |        |   |   |   |   | 36.33                      | 32.36                      | -0.33                      |        | 0.59                    | 0.53                    | -0.31                      |        |
| Afghanistan                              | (8.86,<br>12.37)        | (9.73,<br>11.27)        | (0.00,<br>0.00)*         | <0.001 | — | — | — | — | (33.25,<br>39.67)          | (31.02,<br>33.74)          | (-0.51,<br>-0.14)          | <0.001 | (0.25,<br>1.25)         | (0.37,<br>0.74)         | (-0.50,<br>-0.11)          | 0.002  |
|                                          | 18.95                   | 18.95                   | 0.00                     |        |   |   |   |   | 74.89                      | 85.85                      | 0.33                       |        | 1.23                    | 1.41                    | 0.34                       |        |
| Albania                                  | (15.88,<br>22.46)       | (15.33,<br>23.19)       | (0.00,<br>0.00)          | 1.000  | — | — | — | — | (68.63,<br>81.60)          | (77.91,<br>94.40)          | (-0.26,<br>0.91)           | 0.272  | (0.55,<br>2.41)         | (0.57,<br>2.96)         | (-0.27,<br>0.96)           | 0.273  |
|                                          | 10.48                   | 10.48                   | 0.00                     |        |   |   |   |   | 49.62                      | 34.03                      | -1.29                      |        | 0.79                    | 0.54                    | -1.26                      |        |
| Algeria                                  | (9.59,<br>11.43)        | (9.80,<br>11.19)        | (0.00,<br>0.00)*         | <0.001 | — | — | — | — | (47.67,<br>51.63)          | (32.80,<br>35.30)          | (-1.52,<br>-1.05)          | <0.001 | (0.56,<br>1.09)         | (0.39,<br>0.72)         | (-1.44,<br>-1.09)          | <0.001 |
|                                          | 13.64                   | 13.64                   | 0.00                     |        |   |   |   |   | 149.30                     | 209.09                     | 1.18                       |        | 2.54                    | 3.54                    | 1.15                       |        |
| American Samoa                           | (0.78,<br>68.32)        | (0.78,<br>70.14)        | (0.00,<br>0.00)*         | <0.001 | — | — | — | — | (81.43,<br>253.44)         | (126.09,<br>329.17)        | (0.66,<br>1.70)            | <0.001 | (0.00,<br>50.14)        | (0.00,<br>54.23)        | (0.62,<br>1.69)            | <0.001 |

|                     |         |         |         |        |        |        |         |        |          |          |         |        |        |        |         |        |
|---------------------|---------|---------|---------|--------|--------|--------|---------|--------|----------|----------|---------|--------|--------|--------|---------|--------|
|                     | 17.47   | 17.47   | 0.00    |        |        |        |         |        | 59.63    | 48.49    | -0.71   |        | 0.96   | 0.79   | -0.65   |        |
| Andorra             | (2.59,  | (2.45,  | (0.00,  | <0.001 | —      | —      | —       | —      | (25.88,  | (18.97,  | (-0.78, | <0.001 | (0.00, | (0.00, | (-0.80, | <0.001 |
|                     | 66.08)  | 65.41)  | 0.00)*  |        |        |        |         |        | 123.28)  | 107.34)  | -0.63)  |        | 40.68) | 38.81) | -0.51)  |        |
|                     | 11.64   | 11.64   | 0.00    |        |        |        |         |        | 109.28   | 113.25   | 0.17    |        | 1.84   | 1.92   | 0.19    |        |
| Angola              | (10.16, | (10.72, | (0.00,  | <0.001 | —      | —      | —       | —      | (104.57, | (110.26, | (-0.55, | 0.654  | (1.27, | (1.54, | (-0.54, | 0.616  |
|                     | 13.30)  | 12.64)  | 0.00)*  |        |        |        |         |        | 114.15)  | 116.30)  | 0.89)   |        | 2.59)  | 2.36)  | 0.92)   |        |
|                     | 10.79   | 10.79   | 0.00    |        |        |        |         |        | 80.91    | 85.89    | 0.44    |        | 1.37   | 1.45   | 0.51    |        |
| Antigua and Barbuda | (0.59,  | (1.15,  | (-0.00, | 1.000  | —      | —      | —       | —      | (38.19,  | (47.90,  | (0.11,  | 0.010  | (0.00, | (0.00, | (0.19,  | 0.003  |
|                     | 53.67)  | 41.84)  | 0.00)   |        |        |        |         |        | 152.36)  | 142.79)  | 0.76)   |        | 37.73) | 25.92) | 0.84)   |        |
|                     | 14.47   | 14.47   | 0.00    |        | 2.35   |        |         |        | 109.47   | 82.28    | -0.98   |        | 1.84   | 1.37   | -1.00   |        |
| Argentina           | (13.52, | (13.68, | (0.00,  | <0.001 | (1.98, | —      | —       | —      | (106.84, | (80.39,  | (-1.26, | <0.001 | (1.51, | (1.14, | (-1.29, | <0.001 |
|                     | 15.46)  | 15.29)  | 0.00)*  |        | 2.78)  |        |         |        | 112.16)  | 84.21)   | -0.69)  |        | 2.22)  | 1.64)  | -0.70)  |        |
|                     | 14.23   | 14.23   | 0.00    |        |        |        |         |        | 78.91    | 52.02    | -1.47   |        | 1.36   | 0.89   | -1.51   |        |
| Armenia             | (11.59, | (11.25, | (0.00,  | <0.001 | —      | —      | —       | —      | (72.48,  | (46.36,  | (-3.05, | 0.073  | (0.64, | (0.30, | (-3.15, | 0.075  |
|                     | 17.32)  | 17.85)  | 0.00)*  |        |        |        |         |        | 85.77)   | 58.28)   | 0.14)   |        | 2.57)  | 2.20)  | 0.16)   |        |
|                     | 17.11   | 17.11   | 0.00    |        |        |        |         |        | 113.04   | 70.15    | -1.62   |        | 1.83   | 1.15   | -1.57   |        |
| Australia           | (15.75, | (15.88, | (0.00,  | <0.001 | —      | —      | —       | —      | (109.51, | (67.68,  | (-2.10, | <0.001 | (1.40, | (0.86, | (-2.06, | <0.001 |
|                     | 18.56)  | 18.42)  | 0.00)*  |        |        |        |         |        | 116.66)  | 72.70)   | -1.14)  |        | 2.34)  | 1.53)  | -1.09)  |        |
|                     | 21.57   | 20.51   | -0.18   |        |        |        |         |        | 104.72   | 32.88    | -3.90   |        | 1.71   | 0.51   | -4.06   |        |
| Austria             | (19.31, | (18.23, | (-0.25, | <0.001 | —      | —      | —       | —      | (99.62,  | (30.02,  | (-4.29, | <0.001 | (1.12, | (0.22, | (-4.50, | <0.001 |
|                     | 24.05)  | 23.02)  | -0.11)  |        |        |        |         |        | 110.03)  | 35.98)   | -3.52)  |        | 2.53)  | 1.07)  | -3.62)  |        |
|                     | 14.23   | 14.23   | 0.00    |        | 4.10   | 3.89   | -0.32   |        | 385.75   | 365.18   | -0.30   |        | 6.63   | 6.22   | -0.35   |        |
| Azerbaijan          | (12.40, | (12.68, | (0.00,  | <0.001 | (3.02, | (3.13, | (-0.46, | <0.001 | (375.68, | (357.29, | (-1.17, | 0.491  | (5.36, | (5.24, | (-1.10, | 0.358  |
|                     | 16.29)  | 15.94)  | 0.00)*  |        | 5.43)  | 4.80)  | -0.18)  |        | 396.05)  | 373.22)  | 0.56)   |        | 8.13)  | 7.36)  | 0.40)   |        |
|                     | 10.79   | 10.79   | 0.00    |        |        |        |         |        | 205.06   | 267.16   | 0.92    |        | 3.53   | 4.67   | 0.95    |        |
| Bahamas             | (3.99,  | (4.64,  | (0.00,  | 0.080  | —      | —      | —       | —      | (168.58, | (231.25, | (0.21,  | 0.011  | (0.38, | (1.12, | (0.17,  | 0.018  |
|                     | 24.23)  | 21.47)  | 0.00)   |        |        |        |         |        | 247.52)  | 307.17)  | 1.64)   |        | 14.03) | 12.95) | 1.73)   |        |
|                     | 10.48   | 10.48   | 0.00    |        |        |        |         |        | 64.34    | 45.53    | -1.22   |        | 0.96   | 0.68   | -1.37   |        |
| Bahrain             | (5.83,  | (7.07,  | (0.00,  | <0.001 | —      | —      | —       | —      | (50.69,  | (37.58,  | (-1.66, | <0.001 | (0.04, | (0.07, | (-1.85, | <0.001 |
|                     | 18.18)  | 15.18)  | 0.00)*  |        |        |        |         |        | 80.97)   | 54.80)   | -0.77)  |        | 5.88)  | 2.93)  | -0.88)  |        |
|                     | 11.64   | 11.64   | 0.00    |        |        |        |         |        | 13.95    | 17.50    | 0.80    |        | 0.22   | 0.28   | 0.93    |        |
| Bangladesh          | (11.18, | (11.28, | (0.00,  | <0.001 | —      | —      | —       | —      | (13.45,  | (17.04,  | (0.07,  | 0.031  | (0.16, | (0.23, | (0.43,  | <0.001 |
|                     | 12.12)  | 12.02)  | 0.00)*  |        |        |        |         |        | 14.47)   | 17.96)   | 1.54)   |        | 0.30)  | 0.35)  | 1.44)   |        |

|                |         |         |         |        |   |        |   |   |          |          |         |        |        |        |         |        |
|----------------|---------|---------|---------|--------|---|--------|---|---|----------|----------|---------|--------|--------|--------|---------|--------|
|                | 10.79   | 10.79   | 0.00    |        |   |        |   |   | 142.75   | 122.90   | -0.61   |        | 2.43   | 2.09   | -0.60   |        |
| Barbados       | (3.88,  | (3.65,  | (0.00,  | <0.001 | — | —      | — | — | (112.55, | (94.13,  | (-1.63, | 0.251  | (0.13, | (0.06, | (-1.35, | 0.119  |
|                | 23.96)  | 24.88)  | 0.00)*  |        |   |        |   |   | 178.67)  | 157.91)  | 0.43)   |        | 11.61) | 11.77) | 0.16)   |        |
|                | 16.28   | 16.28   | 0.00    |        |   | 4.05   |   |   | 401.44   | 573.29   | 1.16    |        | 7.09   | 10.21  | 1.19    |        |
| Belarus        | (14.54, | (14.27, | (0.00,  | <0.001 | — | (3.23, | — | — | (392.92, | (562.35, | (0.25,  | 0.013  | (6.00, | (8.80, | (0.25,  | 0.013  |
|                | 18.18)  | 18.53)  | 0.00)*  |        |   | 5.09)  |   |   | 410.11)  | 584.43)  | 2.09)   |        | 8.34)  | 11.82) | 2.14)   |        |
|                | 14.59   | 14.59   | -0.03   |        |   |        |   |   | 41.80    | 21.87    | -2.26   |        | 0.65   | 0.33   | -2.33   |        |
| Belgium        | (12.92, | (12.86, | (-0.13, | 0.600  | — | —      | — | — | (38.93,  | (19.76,  | (-2.57, | <0.001 | (0.34, | (0.12, | (-2.65, | <0.001 |
|                | 16.42)  | 16.50)  | 0.07)   |        |   |        |   |   | 44.84)   | 24.15)   | -1.94)  |        | 1.14)  | 0.74)  | -2.00)  |        |
|                | 10.79   | 10.79   | 0.00    |        |   |        |   |   | 89.45    | 121.67   | 0.80    |        | 1.49   | 2.07   | 0.93    |        |
| Belize         | (2.73,  | (4.99,  | (0.00,  | <0.001 | — | —      | — | — | (60.12,  | (99.11,  | (0.63,  | <0.001 | (0.00, | (0.19, | (0.60,  | <0.001 |
|                | 30.78)  | 20.61)  | 0.00)*  |        |   |        |   |   | 129.28)  | 147.98)  | 0.98)   |        | 16.86) | 8.49)  | 1.25)   |        |
|                | 11.64   | 11.64   | 0.00    |        |   |        |   |   | 97.61    | 80.47    | -0.66   |        | 1.59   | 1.31   | -0.66   |        |
| Benin          | (9.29,  | (10.26, | (0.00,  | <0.001 | — | —      | — | — | (90.63,  | (76.80,  | (-0.79, | <0.001 | (0.81, | (0.88, | (-0.78, | <0.001 |
|                | 14.45)  | 13.18)  | 0.00)*  |        |   |        |   |   | 105.02)  | 84.28)   | -0.54)  |        | 2.86)  | 1.90)  | -0.55)  |        |
|                | 10.79   | 10.79   | 0.00    |        |   |        |   |   | 76.66    | 64.81    | -0.53   |        | 1.28   | 1.08   | -0.54   |        |
| Bermuda        | (0.64,  | (0.23,  | (0.00,  | <0.001 | — | —      | — | — | (36.81,  | (23.79,  | (-0.71, | <0.001 | (0.00, | (0.00, | (-0.75, | <0.001 |
|                | 57.03)  | 70.47)  | 0.00)*  |        |   |        |   |   | 146.57)  | 147.72)  | -0.34)  |        | 41.92) | 54.01) | -0.33)  |        |
|                | 11.64   | 11.64   | 0.00    |        |   |        |   |   | 7.77     | 9.43     | 0.64    |        | 0.13   | 0.15   | 0.57    |        |
| Bhutan         | (6.49,  | (7.26,  | (0.00,  | <0.001 | — | —      | — | — | (3.70,   | (5.54,   | (0.56,  | <0.001 | (0.00, | (0.00, | (0.34,  | <0.001 |
|                | 19.76)  | 17.81)  | 0.00)*  |        |   |        |   |   | 14.90)   | 15.13)   | 0.72)   |        | 4.22)  | 2.55)  | 0.79)   |        |
| Bolivia        | 10.67   | 10.67   | 0.00    |        |   |        |   |   | 33.96    | 30.61    | -0.37   |        | 0.56   | 0.50   | -0.42   |        |
| (Plurinational | (8.87,  | (9.41,  | (0.00,  | <0.001 | — | —      | — | — | (30.67,  | (28.44,  | (-0.50, | <0.001 | (0.21, | (0.26, | (-0.57, | <0.001 |
| State of)      | 12.76)  | 12.07)  | 0.00)*  |        |   |        |   |   | 37.52)   | 32.91)   | -0.24)  |        | 1.22)  | 0.88)  | -0.26)  |        |
|                | 18.95   | 18.95   | 0.00    |        |   |        |   |   | 83.17    | 97.20    | 0.45    |        | 1.41   | 1.65   | 0.45    |        |
| Bosnia and     | (16.35, | (15.41, | (0.00,  | <0.001 | — | —      | — | — | (77.64,  | (89.15,  | (-0.03, | 0.065  | (0.78, | (0.76, | (-0.03, | 0.068  |
| Herzegovina    | 21.85)  | 23.10)  | 0.00)*  |        |   |        |   |   | 89.00)   | 105.84)  | 0.93)   |        | 2.37)  | 3.20)  | 0.94)   |        |
|                | 11.64   | 11.64   | 0.00    |        |   |        |   |   | 108.66   | 96.46    | -0.41   |        | 1.80   | 1.60   | -0.40   |        |
| Botswana       | (7.56,  | (8.91,  | (0.00,  | 0.085  | — | —      | — | — | (95.26,  | (88.24,  | (-0.59, | <0.001 | (0.47, | (0.71, | (-0.56, | <0.001 |
|                | 17.36)  | 14.97)  | 0.00)   |        |   |        |   |   | 123.57)  | 105.25)  | -0.24)  |        | 4.98)  | 3.12)  | -0.24)  |        |
|                | 11.95   | 11.95   | 0.00    |        |   |        |   |   | 159.90   | 125.80   | -0.84   |        | 2.77   | 2.15   | -0.91   |        |
| Brazil         | (11.56, | (11.62, | (0.00,  | <0.001 | — | —      | — | — | (158.44, | (124.75, | (-1.03, | <0.001 | (2.58, | (2.01, | (-1.11, | <0.001 |
|                | 12.34)  | 12.28)  | 0.00)*  |        |   |        |   |   | 161.37)  | 126.85)  | -0.65)  |        | 2.97)  | 2.29)  | -0.71)  |        |

|                             |         |         |         |        |          |         |         |        |          |          |         |        |        |        |         |        |
|-----------------------------|---------|---------|---------|--------|----------|---------|---------|--------|----------|----------|---------|--------|--------|--------|---------|--------|
|                             | 20.82   | 20.82   | 0.00    |        | 11.49    | 6.11    | -2.28   |        | 292.93   | 186.63   | -1.55   |        | 4.77   | 3.12   | -1.46   |        |
| Brunei Darussalam           | (11.27, | (13.07, | (0.00,  | <0.001 | (4.91,   | (2.56,  | (-2.84, | <0.001 | (253.12, | (162.22, | (-1.97, | <0.001 | (1.04, | (0.76, | (-1.87, | <0.001 |
|                             | 35.51)  | 31.76)  | 0.00)*  |        | 23.30)   | 12.91)  | -1.72)  |        | 337.48)  | 213.96)  | -1.13)  |        | 14.12) | 9.00)  | -1.04)  |        |
|                             | 18.95   | 18.95   | 0.00    |        |          |         |         |        | 56.02    | 94.16    | 1.87    |        | 0.94   | 1.59   | 1.89    |        |
| Bulgaria                    | (16.80, | (16.31, | (-0.00, | 1.000  | —        | —       | —       | —      | (52.32,  | (88.35,  | (1.58,  | <0.001 | (0.52, | (0.93, | (1.60,  | <0.001 |
|                             | 21.29)  | 21.92)  | 0.00)   |        |          |         |         |        | 59.90)   | 100.29)  | 2.16)   |        | 1.57)  | 2.61)  | 2.18)   |        |
|                             | 11.64   | 11.64   | 0.00    |        |          |         |         |        | 73.53    | 73.31    | 0.07    |        | 1.21   | 1.20   | 0.06    |        |
| Burkina Faso                | (9.86,  | (10.58, | (0.00,  | <0.001 | —        | —       | —       | —      | (68.93,  | (70.61,  | (-0.20, | 0.589  | (0.68, | (0.87, | (-0.24, | 0.685  |
|                             | 13.69)  | 12.80)  | 0.00)*  |        |          |         |         |        | 78.38)   | 76.10)   | 0.34)   |        | 2.02)  | 1.62)  | 0.37)   |        |
|                             | 11.64   | 11.64   | 0.00    |        |          |         |         |        | 85.89    | 68.38    | -0.80   |        | 1.47   | 1.17   | -0.80   |        |
| Burundi                     | (9.58,  | (10.25, | (0.00,  | <0.001 | —        | —       | —       | —      | (79.98,  | (64.87,  | (-0.99, | <0.001 | (0.78, | (0.75, | (-0.98, | <0.001 |
|                             | 14.05)  | 13.18)  | 0.00)*  |        |          |         |         |        | 92.14)   | 72.03)   | -0.62)  |        | 2.53)  | 1.74)  | -0.62)  |        |
|                             | 11.64   | 11.64   | 0.00    |        |          |         |         |        | 61.12    | 46.41    | -0.99   |        | 1.01   | 0.73   | -1.11   |        |
| Cabo Verde                  | (4.24,  | (6.53,  | (0.00,  | <0.001 | —        | —       | —       | —      | (41.92,  | (35.36,  | (-1.26, | <0.001 | (0.00, | (0.02, | (-1.38, | <0.001 |
|                             | 28.31)  | 19.34)  | 0.00)*  |        |          |         |         |        | 88.23)   | 59.94)   | -0.71)  |        | 13.64) | 4.52)  | -0.84)  |        |
|                             | 13.01   | 13.01   | 0.00    |        |          |         |         |        | 30.64    | 29.91    | -0.05   |        | 0.52   | 0.51   | -0.02   |        |
| Cambodia                    | (11.35, | (11.85, | (0.00,  | <0.001 | —        | —       | —       | —      | (27.91,  | (28.13,  | (-0.14, | 0.244  | (0.22, | (0.30, | (-0.15, | 0.804  |
|                             | 14.87)  | 14.25)  | 0.00)*  |        |          |         |         |        | 33.60)   | 31.78)   | 0.04)   |        | 1.08)  | 0.81)  | 0.12)   |        |
|                             | 11.64   | 11.64   | 0.00    |        |          |         |         |        | 88.50    | 91.18    | 0.06    |        | 1.45   | 1.49   | 0.05    |        |
| Cameroon                    | (10.07, | (10.77, | (0.00,  | <0.001 | —        | —       | —       | —      | (84.08,  | (88.72,  | (-0.06, | 0.322  | (0.93, | (1.19, | (-0.08, | 0.483  |
|                             | 13.42)  | 12.58)  | 0.00)*  |        |          |         |         |        | 93.10)   | 93.69)   | 0.18)   |        | 2.18)  | 1.85)  | 0.18)   |        |
|                             | 19.08   | 19.08   | 0.00    |        | 126.55   | 86.92   | -1.27   |        | 75.59    | 60.29    | -0.78   |        | 1.03   | 0.83   | -0.78   |        |
| Canada                      | (17.94, | (17.96, | (0.00,  | 1.000  | (123.68, | (84.58, | (-1.48, | <0.001 | (73.33,  | (58.34,  | (-1.00, | <0.001 | (0.78, | (0.62, | (-1.20, | <0.001 |
|                             | 20.27)  | 20.25)  | 0.00)   |        | 129.48)  | 89.32)  | -1.06)  |        | 77.90)   | 62.31)   | -0.55)  |        | 1.33)  | 1.11)  | -0.37)  |        |
|                             | 11.64   | 11.64   | 0.00    |        |          |         |         |        | 108.91   | 102.13   | -0.33   |        | 1.80   | 1.70   | -0.32   |        |
| Central African<br>Republic | (8.78,  | (9.56,  | (0.00,  | <0.001 | —        | —       | —       | —      | (99.72,  | (95.77,  | (-0.68, | 0.066  | (0.79, | (0.96, | (-0.68, | 0.077  |
|                             | 15.23)  | 14.07)  | 0.00)*  |        |          |         |         |        | 118.80)  | 108.82)  | 0.02)   |        | 3.62)  | 2.80)  | 0.04)   |        |
|                             | 11.64   | 11.64   | 0.00    |        |          |         |         |        | 84.52    | 82.15    | 0.03    |        | 1.37   | 1.33   | 0.01    |        |
| Chad                        | (9.53,  | (10.33, | (0.00,  | <0.001 | —        | —       | —       | —      | (78.72,  | (78.68,  | (-0.23, | 0.811  | (0.72, | (0.92, | (-0.23, | 0.925  |
|                             | 14.12)  | 13.10)  | 0.00)*  |        |          |         |         |        | 90.67)   | 85.76)   | 0.30)   |        | 2.42)  | 1.89)  | 0.25)   |        |
|                             | 14.47   | 14.47   | 0.00    |        | 10.85    | 6.63    | -1.73   |        | 71.43    | 70.87    | 0.01    |        | 1.17   | 1.16   | -0.01   |        |
| Chile                       | (13.09, | (13.22, | (-0.01, | 0.928  | (9.70,   | (5.82,  | (-2.33, | <0.001 | (68.30,  | (68.09,  | (-0.33, | 0.959  | (0.80, | (0.83, | (-0.49, | 0.977  |
|                             | 15.96)  | 15.80)  | 0.01)   |        | 12.11)   | 7.53)   | -1.12)  |        | 74.68)   | 73.73)   | 0.34)   |        | 1.67)  | 1.58)  | 0.48)   |        |

|               |         |         |         |        |   |   |   |   |          |         |         |        |         |         |         |        |
|---------------|---------|---------|---------|--------|---|---|---|---|----------|---------|---------|--------|---------|---------|---------|--------|
|               | 16.04   | 15.31   | -0.16   |        |   |   |   |   | 35.87    | 34.21   | -0.13   |        | 0.58    | 0.55    | -0.12   |        |
| China         | (15.90, | (15.16, | (-0.18, | <0.001 | — | — | — | — | (35.65,  | (33.99, | (-0.43, | 0.399  | (0.55,  | (0.53,  | (-0.34, | 0.264  |
|               | 16.19)  | 15.47)  | -0.15)  |        |   |   |   |   | 36.09)   | 34.44)  | 0.17)   |        | 0.60)   | 0.58)   | 0.09)   |        |
|               | 10.79   | 10.79   | 0.00    |        |   |   |   |   | 39.87    | 31.36   | -0.77   |        | 0.66    | 0.51    | -0.80   |        |
| Colombia      | (10.02, | (10.14, | (0.00,  | <0.001 | — | — | — | — | (38.35,  | (30.24, | (-1.08, | <0.001 | (0.47,  | (0.38,  | (-1.11, | <0.001 |
|               | 11.62)  | 11.48)  | 0.00)*  |        |   |   |   |   | 41.44)   | 32.50)  | -0.47)  |        | 0.89)   | 0.68)   | -0.48)  |        |
|               | 11.64   | 11.64   | 0.00    |        |   |   |   |   | 66.15    | 61.36   | -0.25   |        | 1.14    | 1.06    | -0.26   |        |
| Comoros       | (5.24,  | (6.79,  | (0.00,  | <0.001 | — | — | — | — | (48.20,  | (49.14, | (-2.58, | 0.833  | (0.01,  | (0.07,  | (-2.42, | 0.819  |
|               | 23.21)  | 18.76)  | 0.00)*  |        |   |   |   |   | 89.04)   | 75.78)  | 2.12)   |        | 8.68)   | 4.69)   | 1.96)   |        |
|               | 11.64   | 11.64   | 0.00    |        |   |   |   |   | 126.61   | 99.84   | -0.85   |        | 2.12    | 1.69    | -0.67   |        |
| Congo         | (8.63,  | (9.63,  | (0.00,  | <0.001 | — | — | — | — | (115.98, | (93.74, | (-1.67, | 0.042  | (0.95,  | (0.98,  | (-1.41, | 0.080  |
|               | 15.48)  | 13.96)  | 0.00)*  |        |   |   |   |   | 138.03)  | 106.23) | -0.03)  |        | 4.22)   | 2.71)   | 0.08)   |        |
|               | 13.64   | 13.64   | 0.00    |        |   |   |   |   | 31.91    | 32.83   | 0.11    |        | 0.53    | 0.54    | 0.08    |        |
| Cook Islands  | (0.02,  | (0.00,  | (0.00,  | <0.001 | — | — | — | — | (1.36,   | (0.55,  | (0.02,  | 0.022  | (0.00,  | (0.00,  | (-0.14, | 0.469  |
|               | 144.49) | 170.03) | 0.00)*  |        |   |   |   |   | 174.88)  | 204.73) | 0.21)   |        | 122.12) | 144.95) | 0.29)   |        |
|               | 10.79   | 10.79   | 0.00    |        |   |   |   |   | 88.97    | 88.40   | 0.05    |        | 1.48    | 1.48    | 0.22    |        |
| Costa Rica    | (8.36,  | (8.79,  | (0.00,  | <0.001 | — | — | — | — | (81.66,  | (82.50, | (-1.00, | 0.932  | (0.67,  | (0.81,  | (-0.60, | 0.598  |
|               | 13.75)  | 13.13)  | 0.00)*  |        |   |   |   |   | 96.78)   | 94.63)  | 1.11)   |        | 2.85)   | 2.51)   | 1.04)   |        |
|               | 11.64   | 11.64   | 0.00    |        |   |   |   |   | 98.31    | 80.86   | -0.68   |        | 1.59    | 1.31    | -0.65   |        |
| Cote d'Ivoire | (10.28, | (10.75, | (0.00,  | 0.087  | — | — | — | — | (94.34,  | (78.48, | (-0.91, | <0.001 | (1.12,  | (1.02,  | (-0.86, | <0.001 |
|               | 13.15)  | 12.60)  | 0.00)   |        |   |   |   |   | 102.41)  | 83.29)  | -0.46)  |        | 2.21)   | 1.65)   | -0.43)  |        |
|               | 17.05   | 17.28   | 0.03    |        |   |   |   |   | 55.13    | 48.69   | -0.31   |        | 0.92    | 0.83    | -0.20   |        |
| Croatia       | (14.48, | (14.22, | (-0.03, | 0.348  | — | — | — | — | (50.52,  | (43.67, | (-1.01, | 0.393  | (0.42,  | (0.30,  | (-1.04, | 0.645  |
|               | 19.96)  | 20.86)  | 0.09)   |        |   |   |   |   | 60.07)   | 54.20)  | 0.40)   |        | 1.80)   | 1.93)   | 0.65)   |        |
|               | 10.79   | 10.79   | 0.00    |        |   |   |   |   | 65.92    | 77.92   | 0.58    |        | 1.11    | 1.32    | 0.63    |        |
| Cuba          | (9.50,  | (9.36,  | (0.00,  | <0.001 | — | — | — | — | (62.60,  | (74.01, | (0.18,  | 0.004  | (0.71,  | (0.86,  | (0.19,  | 0.005  |
|               | 12.22)  | 12.40)  | 0.00)*  |        |   |   |   |   | 69.37)   | 81.99)  | 0.98)   |        | 1.65)   | 1.96)   | 1.06)   |        |
|               | 17.49   | 17.49   | 0.01    |        |   |   |   |   | 68.89    | 57.30   | -0.58   |        | 1.11    | 0.94    | -0.53   |        |
| Cyprus        | (11.59, | (12.61, | (-0.06, | 0.811  | — | — | — | — | (56.54,  | (48.37, | (-0.85, | <0.001 | (0.11,  | (0.15,  | (-0.75, | <0.001 |
|               | 25.41)  | 23.95)  | 0.07)   |        |   |   |   |   | 83.20)   | 67.71)  | -0.30)  |        | 4.48)   | 3.73)   | -0.30)  |        |
|               | 21.76   | 21.76   | 0.01    |        |   |   |   |   | 94.60    | 64.05   | -1.33   |        | 1.59    | 1.08    | -1.38   |        |
| Czechia       | (19.70, | (19.46, | (0.01,  | <0.001 | — | — | — | — | (90.29,  | (60.25, | (-1.71, | <0.001 | (1.08,  | (0.64,  | (-1.88, | <0.001 |
|               | 24.00)  | 24.29)  | 0.01)   |        |   |   |   |   | 99.07)   | 68.06)  | -0.96)  |        | 2.27)   | 1.75)   | -0.87)  |        |

|                   |         |         |         |        |   |   |   |          |          |         |        |        |        |         |        |
|-------------------|---------|---------|---------|--------|---|---|---|----------|----------|---------|--------|--------|--------|---------|--------|
| Democratic        | 14.01   | 14.01   | 0.00    |        |   |   |   | 41.20    | 45.55    | 0.34    |        | 0.67   | 0.74   | 0.35    |        |
| People's Republic | (12.86, | (13.01, | (0.00,  | <0.001 | — | — | — | (39.20,  | (43.74,  | (0.27,  | <0.001 | (0.43, | (0.52, | (0.26,  | <0.001 |
| of Korea          | 15.24)  | 15.08)  | 0.00)*  |        |   |   |   | 43.28)   | 47.43)   | 0.42)   |        | 0.98)  | 1.01)  | 0.44)   |        |
| Democratic        | 11.64   | 11.64   | 0.00    |        |   |   |   | 94.02    | 98.08    | 0.10    |        | 1.59   | 1.66   | 0.07    |        |
| Republic of the   | (10.83, | (11.13, | (0.00,  | <0.001 | — | — | — | (91.64,  | (96.55,  | (-0.09, | 0.317  | (1.29, | (1.47, | (-0.11, | 0.457  |
| Congo             | 12.50)  | 12.18)  | 0.00)*  |        |   |   |   | 96.46)   | 99.63)   | 0.29)   |        | 1.95)  | 1.88)  | 0.25)   |        |
|                   | 16.66   | 16.66   | 0.00    |        |   |   |   | 56.82    | 35.44    | -1.68   |        | 0.93   | 0.58   | -1.67   |        |
| Denmark           | (14.20, | (14.13, | (0.00,  | <0.001 | — | — | — | (52.23,  | (31.73,  | (-2.26, | <0.001 | (0.43, | (0.20, | (-2.27, | <0.001 |
|                   | 19.44)  | 19.54)  | 0.00)*  |        |   |   |   | 61.73)   | 39.49)   | -1.10)  |        | 1.78)  | 1.35)  | -1.06)  |        |
|                   | 11.64   | 11.64   | 0.00    |        |   |   |   | 82.82    | 76.27    | -0.19   |        | 1.43   | 1.31   | -0.16   |        |
| Djibouti          | (5.96,  | (7.88,  | (0.00,  | 0.003  | — | — | — | (65.22,  | (66.03,  | (-1.14, | 0.700  | (0.07, | (0.31, | (-0.80, | 0.630  |
|                   | 21.05)  | 16.59)  | 0.00)*  |        |   |   |   | 104.00)  | 87.67)   | 0.78)   |        | 7.33)  | 3.63)  | 0.49)   |        |
|                   | 10.79   | 10.79   | 0.00    |        |   |   |   | 339.28   | 320.18   | -0.18   |        | 5.83   | 5.53   | -0.19   |        |
| Dominica          | (0.83,  | (0.69,  | (0.00,  | <0.001 | — | — | — | (248.59, | (230.63, | (-0.44, | 0.162  | (0.06, | (0.04, | (-0.51, | 0.243  |
|                   | 49.39)  | 48.28)  | 0.00)*  |        |   |   |   | 453.80)  | 433.20)  | 0.07)   |        | 41.84) | 39.33) | 0.13)   |        |
|                   | 10.79   | 10.79   | 0.00    |        |   |   |   | 40.55    | 48.36    | 0.69    |        | 0.68   | 0.82   | 0.72    |        |
| Dominican         | (9.13,  | (9.48,  | (-0.00, | 1.000  | — | — | — | (37.21,  | (45.53,  | (0.18,  | 0.008  | (0.31, | (0.49, | (0.25,  | 0.003  |
| Republic          | 12.70)  | 12.24)  | 0.00)   |        |   |   |   | 44.13)   | 51.32)   | 1.21)   |        | 1.32)  | 1.29)  | 1.19)   |        |
|                   | 10.63   | 10.66   | 0.01    |        |   |   |   | 30.49    | 36.98    | 0.55    |        | 0.50   | 0.61   | 0.57    |        |
| Ecuador           | (9.22,  | (9.61,  | (-0.00, | 0.134  | — | — | — | (28.07,  | (35.01,  | (0.09,  | 0.018  | (0.23, | (0.38, | (0.22,  | 0.001  |
|                   | 12.21)  | 11.79)  | 0.02)   |        |   |   |   | 33.08)   | 39.03)   | 1.01)   |        | 0.95)  | 0.92)  | 0.93)   |        |
|                   | 10.48   | 10.48   | 0.00    |        |   |   |   | 77.17    | 65.02    | -0.59   |        | 1.21   | 1.01   | -0.62   |        |
| Egypt             | (9.88,  | (10.04, | (0.00,  | <0.001 | — | — | — | (75.56,  | (63.94,  | (-0.86, | <0.001 | (1.01, | (0.88, | (-0.92, | <0.001 |
|                   | 11.10)  | 10.92)  | 0.00)*  |        |   |   |   | 78.80)   | 66.12)   | -0.32)  |        | 1.43)  | 1.16)  | -0.33)  |        |
|                   | 10.79   | 10.79   | 0.00    |        |   |   |   | 23.56    | 18.22    | -0.83   |        | 0.39   | 0.30   | -0.89   |        |
| El Salvador       | (8.76,  | (8.99,  | (0.00,  | 0.077  | — | — | — | (20.49,  | (15.82,  | (-1.63, | 0.045  | (0.09, | (0.07, | (-1.76, | 0.046  |
|                   | 13.19)  | 12.88)  | 0.00)   |        |   |   |   | 26.99)   | 20.90)   | -0.02)  |        | 1.13)  | 0.87)  | -0.02)  |        |
|                   | 11.64   | 11.64   | 0.00    |        |   |   |   | 115.03   | 80.15    | -1.30   |        | 1.92   | 1.35   | -1.26   |        |
| Equatorial Guinea | (4.78,  | (8.22,  | (0.00,  | <0.001 | — | — | — | (89.98,  | (70.42,  | (-1.55, | <0.001 | (0.08, | (0.37, | (-1.52, | <0.001 |
|                   | 24.43)  | 16.22)  | 0.00)*  |        |   |   |   | 145.39)  | 91.00)   | -1.05)  |        | 10.62) | 3.72)  | -1.00)  |        |
|                   | 11.64   | 11.64   | 0.00    |        |   |   |   | 70.25    | 81.41    | 0.52    |        | 1.20   | 1.40   | 0.53    |        |
| Eritrea           | (8.93,  | (9.92,  | (0.00,  | <0.001 | — | — | — | (63.05,  | (76.61,  | (0.30,  | <0.001 | (0.43, | (0.83, | (0.32,  | <0.001 |
|                   | 15.01)  | 13.60)  | 0.00)*  |        |   |   |   | 78.09)   | 86.44)   | 0.74)   |        | 2.74)  | 2.23)  | 0.74)   |        |

|          |         |         |         |        |         |        |   |   |          |          |         |        |        |        |         |        |
|----------|---------|---------|---------|--------|---------|--------|---|---|----------|----------|---------|--------|--------|--------|---------|--------|
|          | 16.28   | 16.28   | 0.00    |        |         | 4.28   |   |   | 297.14   | 163.20   | -1.94   |        | 5.35   | 2.91   | -1.96   |        |
| Estonia  | (11.94, | (11.14, | (0.00,  | <0.001 | —       | (2.16, | — | — | (278.12, | (147.61, | (-2.80, | <0.001 | (3.08, | (1.19, | (-2.87, | <0.001 |
|          | 21.73)  | 23.25)  | 0.00)*  |        |         | 8.21)  |   |   | 317.18)  | 180.32)  | -1.08)  |        | 8.73)  | 6.54)  | -1.03)  |        |
|          | 11.64   | 11.64   | 0.00    |        |         |        |   |   | 70.82    | 91.70    | 0.86    |        | 1.17   | 1.51   | 0.85    |        |
| Eswatini | (6.35,  | (7.71,  | (0.00,  | <0.001 | —       | —      | — | — | (56.54,  | (79.94,  | (0.69,  | <0.001 | (0.07, | (0.37, | (0.64,  | <0.001 |
|          | 20.01)  | 16.98)  | 0.00)*  |        |         |        |   |   | 87.93)   | 104.78)  | 1.03)   |        | 5.98)  | 4.22)  | 1.06)   |        |
|          | 12.86   | 12.86   | 0.00    |        |         |        |   |   | 57.45    | 50.99    | -0.40   |        | 0.98   | 0.87   | -0.42   |        |
| Ethiopia | (12.09, | (12.37, | (0.00,  | <0.001 | —       | —      | — | — | (55.77,  | (49.97,  | (-0.53, | <0.001 | (0.77, | (0.74, | (-0.61, | <0.001 |
|          | 13.66)  | 13.37)  | 0.00)*  |        |         |        |   |   | 59.18)   | 52.03)   | -0.28)  |        | 1.24)  | 1.02)  | -0.23)  |        |
|          | 13.64   | 13.64   | 0.00    |        |         |        |   |   | 88.88    | 92.23    | 0.10    |        | 1.49   | 1.54   | 0.08    |        |
| Fiji     | (8.55,  | (8.83,  | (0.00,  | <0.001 | —       | —      | — | — | (74.76,  | (78.87,  | (-0.26, | 0.592  | (0.22, | (0.30, | (-0.34, | 0.709  |
|          | 20.83)  | 20.16)  | 0.00)*  |        |         |        |   |   | 105.01)  | 107.23)  | 0.46)   |        | 5.18)  | 4.66)  | 0.50)   |        |
|          | 17.70   | 17.70   | 0.01    |        |         |        |   |   | 155.93   | 96.01    | -1.63   |        | 2.66   | 1.63   | -1.67   |        |
| Finland  | (15.08, | (14.99, | (-0.01, | 0.521  | —       | —      | — | — | (148.26, | (89.76,  | (-2.03, | <0.001 | (1.75, | (0.91, | (-2.09, | <0.001 |
|          | 20.68)  | 20.78)  | 0.02)   |        |         |        |   |   | 163.94)  | 102.62)  | -1.22)  |        | 3.94)  | 2.74)  | -1.24)  |        |
|          | 17.47   | 17.47   | 0.00    |        | 10.66   |        |   |   | 59.15    | 34.62    | -1.82   |        | 0.94   | 0.55   | -1.84   |        |
| France   | (16.70, | (16.65, | (0.00,  | <0.001 | (10.06, | —      | — | — | (57.74,  | (33.48,  | (-2.07, | <0.001 | (0.77, | (0.41, | (-2.14, | <0.001 |
|          | 18.26)  | 18.31)  | 0.00)*  |        | 11.29)  |        |   |   | 60.58)   | 35.79)   | -1.57)  |        | 1.14)  | 0.71)  | -1.53)  |        |
|          | 11.64   | 11.64   | 0.00    |        |         |        |   |   | 121.43   | 110.54   | -0.35   |        | 2.05   | 1.86   | -0.36   |        |
| Gabon    | (7.28,  | (8.33,  | (-0.00, | 1.000  | —       | —      | — | — | (106.02, | (99.64,  | (-0.93, | 0.241  | (0.52, | (0.70, | (-0.92, | 0.205  |
|          | 17.79)  | 15.90)  | 0.00)   |        |         |        |   |   | 138.54)  | 122.34)  | 0.23)   |        | 5.57)  | 4.05)  | 0.20)   |        |
|          | 11.64   | 11.64   | 0.00    |        |         |        |   |   | 84.63    | 90.78    | 0.33    |        | 1.38   | 1.47   | 0.30    |        |
| Gambia   | (7.08,  | (8.62,  | (-0.00, | 1.000  | —       | —      | — | — | (71.51,  | (82.08,  | (-0.50, | 0.436  | (0.21, | (0.55, | (-0.50, | 0.465  |
|          | 18.35)  | 15.47)  | 0.00)   |        |         |        |   |   | 99.71)   | 100.23)  | 1.17)   |        | 5.04)  | 3.26)  | 1.10)   |        |
|          | 14.23   | 14.20   | -0.01   |        |         |        |   |   | 89.97    | 103.50   | 0.56    |        | 1.56   | 1.80   | 0.57    |        |
| Georgia  | (12.04, | (11.36, | (-0.01, | <0.001 | —       | —      | — | — | (84.33,  | (95.81,  | (-0.34, | 0.225  | (0.90, | (0.92, | (-0.33, | 0.215  |
|          | 16.72)  | 17.60)  | -0.01)  |        |         |        |   |   | 95.89)   | 111.70)  | 1.46)   |        | 2.53)  | 3.25)  | 1.47)   |        |
|          | 16.74   | 16.74   | 0.00    |        |         |        |   |   | 92.12    | 52.49    | -1.97   |        | 1.53   | 0.86   | -2.02   |        |
| Germany  | (16.09, | (16.05, | (0.00,  | <0.001 | —       | —      | — | — | (90.61,  | (51.29,  | (-2.29, | <0.001 | (1.34, | (0.71, | (-2.26, | <0.001 |
|          | 17.41)  | 17.45)  | 0.00)*  |        |         |        |   |   | 93.66)   | 53.71)   | -1.66)  |        | 1.74)  | 1.03)  | -1.77)  |        |
|          | 11.64   | 11.64   | 0.00    |        |         |        |   |   | 80.77    | 102.47   | 0.83    |        | 1.31   | 1.67   | 0.84    |        |
| Ghana    | (10.37, | (10.82, | (0.00,  | <0.001 | —       | —      | — | — | (77.40,  | (100.00, | (0.66,  | <0.001 | (0.91, | (1.37, | (0.67,  | <0.001 |
|          | 13.04)  | 12.52)  | 0.00)*  |        |         |        |   |   | 84.25)   | 104.98)  | 1.00)   |        | 1.84)  | 2.02)  | 1.01)   |        |

|               |         |         |        |        |         |         |         |        |          |          |         |        |        |        |         |        |
|---------------|---------|---------|--------|--------|---------|---------|---------|--------|----------|----------|---------|--------|--------|--------|---------|--------|
|               | 17.47   | 17.47   | 0.00   |        |         |         |         |        | 40.39    | 39.93    | -0.04   |        | 0.64   | 0.66   | 0.08    |        |
| Greece        | (15.63, | (15.37, | (0.00, | <0.001 | —       | —       | —       | —      | (37.58,  | (36.80,  | (-0.32, | 0.770  | (0.33, | (0.32, | (-0.24, | 0.632  |
|               | 19.46)  | 19.79)  | 0.00)* |        |         |         |         |        | 43.36)   | 43.27)   | 0.24)   |        | 1.12)  | 1.24)  | 0.40)   |        |
|               | 19.08   | 19.08   | 0.00   |        | 148.38  | 113.53  | -0.92   |        | 198.46   | 144.65   | -1.08   |        | 3.25   | 2.33   | -1.11   |        |
| Greenland     | (3.40,  | (2.27,  | (0.00, | <0.001 | (93.66, | (59.48, | (-1.10, | <0.001 | (133.17, | (82.15,  | (-1.46, | <0.001 | (0.00, | (0.00, | (-1.42, | <0.001 |
|               | 69.66)  | 76.04)  | 0.00)* |        | 231.01) | 201.75) | (-0.74) |        | 291.45)  | 240.97)  | (-0.69) |        | 46.46) | 49.20) | (-0.80) |        |
|               | 10.79   | 10.79   | 0.00   |        |         |         |         |        | 152.35   | 136.51   | -0.51   |        | 2.66   | 2.35   | -0.57   |        |
| Grenada       | (1.03,  | (1.54,  | (0.00, | <0.001 | —       | —       | —       | —      | (96.45,  | (90.08,  | (-1.00, | 0.044  | (0.00, | (0.00, | (-1.08, | 0.031  |
|               | 45.91)  | 38.76)  | 0.00)* |        |         |         |         |        | 230.25)  | 199.35)  | (-0.01) |        | 33.00) | 25.32) | (-0.05) |        |
|               | 13.64   | 13.64   | 0.00   |        |         |         |         |        | 70.85    | 82.26    | 0.42    |        | 1.17   | 1.39   | 0.60    |        |
| Guam          | (4.23,  | (3.96,  | (0.00, | <0.001 | —       | —       | —       | —      | (45.38,  | (53.32,  | (0.11,  | 0.008  | (0.00, | (0.00, | (0.05,  | 0.031  |
|               | 33.49)  | 34.63)  | 0.00)* |        |         |         |         |        | 105.97)  | 121.67)  | 0.73)   |        | 14.40) | 15.75) | 1.15)   |        |
|               | 10.79   | 10.79   | 0.00   |        |         |         |         |        | 22.02    | 24.06    | 0.32    |        | 0.36   | 0.40   | 0.39    |        |
| Guatemala     | (9.09,  | (9.76,  | (0.00, | <0.001 | —       | —       | —       | —      | (19.57,  | (22.48,  | (-0.32, | 0.324  | (0.11, | (0.22, | (-0.16, | 0.166  |
|               | 12.74)  | 11.92)  | 0.00)* |        |         |         |         |        | 24.72)   | 25.73)   | 0.97)   |        | 0.89)  | 0.68)  | 0.95)   |        |
|               | 11.64   | 11.64   | 0.00   |        |         |         |         |        | 91.70    | 93.42    | 0.07    |        | 1.49   | 1.52   | 0.06    |        |
| Guinea        | (9.56,  | (10.21, | (0.00, | 0.001  | —       | —       | —       | —      | (85.73,  | (89.35,  | (-0.23, | 0.662  | (0.82, | (1.03, | (-0.16, | 0.593  |
|               | 14.07)  | 13.24)  | 0.00)* |        |         |         |         |        | 97.99)   | 97.65)   | 0.36)   |        | 2.53)  | 2.17)  | 0.27)   |        |
|               | 11.64   | 11.64   | 0.00   |        |         |         |         |        | 103.59   | 93.55    | -0.34   |        | 1.66   | 1.51   | -0.32   |        |
| Guinea-Bissau | (6.96,  | (8.39,  | (0.00, | <0.001 | —       | —       | —       | —      | (88.82,  | (84.03,  | (-0.42, | <0.001 | (0.31, | (0.53, | (-0.42, | <0.001 |
|               | 18.57)  | 15.85)  | 0.00)* |        |         |         |         |        | 120.38)  | 103.96)  | (-0.26) |        | 5.59)  | 3.55)  | (-0.23) |        |
|               | 10.79   | 10.79   | 0.00   |        |         |         |         |        | 207.38   | 255.10   | 0.82    |        | 3.54   | 4.43   | 0.87    |        |
| Guyana        | (6.31,  | (6.24,  | (0.00, | <0.001 | —       | —       | —       | —      | (185.14, | (229.78, | (-0.02, | 0.056  | (1.20, | (1.68, | (0.02,  | 0.044  |
|               | 17.47)  | 17.57)  | 0.00)* |        |         |         |         |        | 231.68)  | 282.52)  | 1.66)   |        | 8.29)  | 9.57)  | 1.73)   |        |
|               | 10.79   | 10.79   | 0.00   |        |         |         |         |        | 118.36   | 124.48   | 0.27    |        | 2.03   | 2.14   | 0.26    |        |
| Haiti         | (8.94,  | (9.54,  | (0.00, | <0.001 | —       | —       | —       | —      | (111.92, | (120.09, | (0.02,  | 0.033  | (1.27, | (1.60, | (0.04,  | 0.019  |
|               | 12.93)  | 12.17)  | 0.00)* |        |         |         |         |        | 125.09)  | 129.00)  | 0.51)   |        | 3.11)  | 2.82)  | 0.48)   |        |
|               | 10.79   | 10.79   | 0.00   |        |         |         |         |        | 44.50    | 25.98    | -1.94   |        | 0.77   | 0.45   | -1.93   |        |
| Honduras      | (8.61,  | (9.37,  | (0.00, | <0.001 | —       | —       | —       | —      | (39.75,  | (23.65,  | (-2.32, | <0.001 | (0.26, | (0.19, | (-2.33, | <0.001 |
|               | 13.41)  | 12.39)  | 0.00)* |        |         |         |         |        | 49.67)   | 28.48)   | (-1.56) |        | 1.77)  | 0.90)  | (-1.52) |        |
|               | 18.95   | 18.95   | 0.00   |        |         |         |         |        | 262.90   | 154.13   | -1.80   |        | 4.65   | 2.70   | -1.83   |        |
| Hungary       | (17.01, | (16.76, | (0.00, | 1.000  | —       | —       | —       | —      | (255.86, | (148.08, | (-2.17, | <0.001 | (3.76, | (1.95, | (-2.22, | <0.001 |
|               | 21.06)  | 21.36)  | 0.00)  |        |         |         |         |        | 270.11)  | 160.39)  | (-1.42) |        | 5.70)  | 3.66)  | (-1.44) |        |



|                               |         |         |         |        |         |         |         |        |         |         |         |        |        |        |         |        |
|-------------------------------|---------|---------|---------|--------|---------|---------|---------|--------|---------|---------|---------|--------|--------|--------|---------|--------|
|                               | 17.47   | 17.47   | 0.00    |        |         |         |         |        | 29.40   | 16.52   | -1.90   |        | 0.45   | 0.25   | -1.85   |        |
| Iceland                       | (8.10,  | (8.66,  | (-0.00, | 1.000  | —       | —       | —       | —      | (16.65, | (8.05,  | (-2.49, | <0.001 | (0.00, | (0.00, | (-2.47, | <0.001 |
|                               | 33.10)  | 32.12)  | 0.00)   |        |         |         |         |        | 48.30)  | 30.82)  | -1.31)  |        | 8.36)  | 7.92)  | -1.23)  |        |
|                               | 12.86   | 12.86   | 0.00    |        |         |         |         |        | 10.95   | 10.91   | -0.00   |        | 0.18   | 0.18   | 0.08    |        |
| India                         | (12.69, | (12.73, | (-0.00, | 1.000  | —       | —       | —       | —      | (10.79, | (10.79, | (-0.48, | 0.985  | (0.16, | (0.17, | (-0.55, | 0.810  |
|                               | 13.03)  | 12.99)  | 0.00)   |        |         |         |         |        | 11.11)  | 11.03)  | 0.47)   |        | 0.20)  | 0.20)  | 0.71)   |        |
|                               | 14.13   | 14.13   | 0.00    |        |         |         |         |        | 41.01   | 41.22   | 0.03    |        | 0.69   | 0.69   | 0.02    |        |
| Indonesia                     | (13.75, | (13.81, | (0.00,  | <0.001 | —       | —       | —       | —      | (40.36, | (40.68, | (-0.06, | 0.487  | (0.61, | (0.62, | (-0.20, | 0.879  |
|                               | 14.51)  | 14.45)  | 0.00)*  |        |         |         |         |        | 41.68)  | 41.77)  | 0.12)   |        | 0.78)  | 0.76)  | 0.23)   |        |
|                               | 11.43   | 11.43   |         |        |         |         |         |        | 28.00   | 26.63   | -0.20   |        | 0.44   | 0.41   | -0.24   |        |
| Iran (Islamic<br>Republic of) | (10.80, | (10.94, | —       | —      | —       | —       | —       | —      | (27.02, | (25.85, | (-0.30, | <0.001 | (0.32, | (0.32, | (-0.43, | 0.012  |
|                               | 12.09)  | 11.95)  |         |        |         |         |         |        | 29.01)  | 27.42)  | -0.10)  |        | 0.59)  | 0.52)  | -0.05)  |        |
|                               | 10.48   | 10.48   | 0.00    |        |         |         |         |        | 84.27   | 59.76   | -1.19   |        | 1.36   | 0.95   | -1.23   |        |
| Iraq                          | (9.38,  | (9.83,  | (0.00,  | <0.001 | —       | —       | —       | —      | (81.09, | (58.19, | (-1.36, | <0.001 | (0.98, | (0.76, | (-1.44, | <0.001 |
|                               | 11.67)  | 11.16)  | 0.00)*  |        |         |         |         |        | 87.54)  | 61.36)  | -1.01)  |        | 1.85)  | 1.18)  | -1.01)  |        |
|                               | 17.47   | 17.47   | 0.00    |        |         |         |         |        | 98.25   | 45.70   | -2.63   |        | 1.60   | 0.73   | -2.74   |        |
| Ireland                       | (14.46, | (14.67, | (0.00,  | <0.001 | —       | —       | —       | —      | (90.91, | (41.16, | (-3.02, | <0.001 | (0.79, | (0.27, | (-3.15, | <0.001 |
|                               | 20.92)  | 20.66)  | 0.00)*  |        |         |         |         |        | 106.03) | 50.62)  | -2.23)  |        | 2.89)  | 1.63)  | -2.33)  |        |
|                               | 17.47   | 17.47   | 0.00    |        |         |         |         |        | 49.14   | 21.37   | -2.92   |        | 0.78   | 0.33   | -3.04   |        |
| Israel                        | (14.89, | (15.50, | (0.00,  | <0.001 | —       | —       | —       | —      | (44.75, | (19.20, | (-3.34, | <0.001 | (0.32, | (0.11, | (-3.51, | <0.001 |
|                               | 20.36)  | 19.61)  | 0.00)*  |        |         |         |         |        | 53.84)  | 23.73)  | -2.49)  |        | 1.61)  | 0.75)  | -2.57)  |        |
|                               | 19.16   | 21.04   | 0.34    |        | 0.35    |         |         |        | 73.48   | 26.07   | -3.53   |        | 1.17   | 0.40   | -3.65   |        |
| Italy                         | (18.34, | (20.06, | (0.29,  | <0.001 | (0.24,  | —       | —       | —      | (71.87, | (24.99, | (-3.89, | <0.001 | (0.98, | (0.28, | (-4.01, | <0.001 |
|                               | 20.00)  | 22.06)  | 0.38)   |        | 0.48)   |         |         |        | 75.12)  | 27.19)  | -3.16)  |        | 1.40)  | 0.56)  | -3.29)  |        |
|                               | 10.79   | 10.79   | 0.00    |        |         |         |         |        | 59.27   | 69.59   | 0.68    |        | 1.00   | 1.20   | 0.74    |        |
| Jamaica                       | (7.97,  | (8.30,  | (0.00,  | <0.001 | —       | —       | —       | —      | (52.19, | (62.88, | (-0.45, | 0.240  | (0.28, | (0.47, | (-1.22, | 0.462  |
|                               | 14.39)  | 13.84)  | 0.00)*  |        |         |         |         |        | 67.10)  | 76.83)  | 1.82)   |        | 2.61)  | 2.53)  | 2.75)   |        |
|                               | 22.40   | 22.17   | -0.04   |        | 33.61   | 30.04   | -0.38   |        | 93.62   | 50.77   | -2.08   |        | 1.46   | 0.76   | -2.22   |        |
| Japan                         | (21.79, | (21.45, | (-0.05, | <0.001 | (32.86, | (29.22, | (-0.49, | <0.001 | (92.37, | (49.71, | (-2.24, | <0.001 | (1.31, | (0.64, | (-2.43, | <0.001 |
|                               | 23.03)  | 22.90)  | -0.03)  |        | 34.37)  | 30.88)  | -0.27)  |        | 94.89)  | 51.85)  | -1.92)  |        | 1.63)  | 0.90)  | -2.02)  |        |
|                               | 10.48   | 10.48   | 0.00    |        |         |         |         |        | 23.55   | 12.82   | -2.08   |        | 0.37   | 0.19   | -2.26   |        |
| Jordan                        | (8.26,  | (9.30,  | (0.00,  | 0.011  | —       | —       | —       | —      | (20.16, | (11.51, | (-2.55, | <0.001 | (0.06, | (0.06, | (-3.03, | <0.001 |
|                               | 13.20)  | 11.77)  | 0.00)*  |        |         |         |         |        | 27.43)  | 14.24)  | -1.61)  |        | 1.33)  | 0.44)  | -1.49)  |        |

|              |         |         |         |        |        |        |         |       |          |          |         |        |        |         |         |        |
|--------------|---------|---------|---------|--------|--------|--------|---------|-------|----------|----------|---------|--------|--------|---------|---------|--------|
|              | 14.23   | 14.23   | 0.00    |        | 4.05   | 4.28   | 0.09    |       | 132.63   | 795.79   | 6.69    |        | 2.30   | 14.21   | 6.81    |        |
| Kazakhstan   | (12.99, | (13.00, | (0.00,  | 0.007  | (3.38, | (3.64, | (-0.28, | 0.643 | (128.77, | (786.77, | (5.81,  | <0.001 | (1.81, | (13.03, | (5.93,  | <0.001 |
|              | 15.56)  | 15.56)  | 0.00)*  |        | 4.81)  | 5.02)  | 0.46)   |       | 136.57)  | 804.90)  | 7.58)   |        | 2.87)  | 15.48)  | 7.69)   |        |
|              | 12.86   | 12.86   | 0.00    |        |        |        |         |       | 59.08    | 61.42    | 0.13    |        | 1.02   | 1.05    | 0.11    |        |
| Kenya        | (11.75, | (12.17, | (0.00,  | <0.001 | —      | —      | —       | —     | (56.56,  | (59.86,  | (0.05,  | 0.002  | (0.71, | (0.86,  | (-0.04, | 0.150  |
|              | 14.06)  | 13.58)  | 0.00)*  |        |        |        |         |       | 61.70)   | 63.02)   | 0.21)   |        | 1.43)  | 1.28)   | 0.25)   |        |
|              | 13.64   | 13.64   | 0.00    |        |        |        |         |       | 113.71   | 150.15   | 0.94    |        | 1.94   | 2.59    | 0.98    |        |
| Kiribati     | (1.63,  | (3.04,  | (0.00,  | <0.001 | —      | —      | —       | —     | (64.45,  | (104.15, | (0.74,  | <0.001 | (0.00, | (0.01,  | (0.77,  | <0.001 |
|              | 54.14)  | 39.71)  | 0.00)*  |        |        |        |         |       | 188.04)  | 210.09)  | 1.14)   |        | 35.62) | 22.46)  | 1.18)   |        |
|              | 10.48   | 10.48   | 0.00    |        |        |        |         |       | 40.55    | 25.86    | -1.45   |        | 0.63   | 0.40    | -1.45   |        |
| Kuwait       | (7.78,  | (8.50,  | (0.00,  | <0.001 | —      | —      | —       | —     | (34.96,  | (22.65,  | (-2.22, | <0.001 | (0.13, | (0.10,  | (-2.29, | 0.001  |
|              | 13.98)  | 12.87)  | 0.00)*  |        |        |        |         |       | 46.91)   | 29.49)   | -0.67)  |        | 2.15)  | 1.23)   | -0.61)  |        |
|              | 14.23   | 14.23   | 0.00    |        |        |        |         |       | 165.86   | 278.41   | 1.88    |        | 2.94   | 5.02    | 1.94    |        |
| Kyrgyzstan   | (11.85, | (12.28, | (0.00,  | <0.001 | —      | —      | —       | —     | (157.16, | (269.35, | (1.17,  | <0.001 | (1.88, | (3.86,  | (1.21,  | <0.001 |
|              | 16.98)  | 16.42)  | 0.00)*  |        |        |        |         |       | 174.94)  | 287.72)  | 2.59)   |        | 4.40)  | 6.42)   | 2.67)   |        |
| Lao People's | 13.01   | 13.01   | 0.00    |        |        |        |         |       | 33.14    | 45.30    | 1.13    |        | 0.56   | 0.76    | 1.06    |        |
| Democratic   | (10.50, | (11.29, | (0.00,  | <0.001 | —      | —      | —       | —     | (28.94,  | (42.00,  | (0.95,  | <0.001 | (0.14, | (0.39,  | (0.89,  | <0.001 |
| Republic     | 15.97)  | 14.92)  | 0.00)*  |        |        |        |         |       | 37.82)   | 48.80)   | 1.31)   |        | 1.53)  | 1.35)   | 1.24)   |        |
|              | 15.92   | 15.92   | 0.02    |        |        | 8.14   |         |       | 673.31   | 979.57   | 1.20    |        | 11.91  | 17.56   | 1.26    |        |
| Latvia       | (12.55, | (11.54, | (-0.08, | 0.705  | —      | (5.45, | —       | —     | (650.68, | (946.33, | (0.03,  | 0.045  | (9.07, | (13.38, | (0.10,  | 0.034  |
|              | 19.95)  | 21.57)  | 0.12)   |        |        | 11.99) |         |       | 696.56)  | 1013.88) | 2.39)   |        | 15.39) | 22.88)  | 2.44)   |        |
|              | 10.48   | 10.48   | 0.00    |        |        |        |         |       | 68.75    | 57.87    | -0.57   |        | 1.08   | 0.90    | -0.64   |        |
| Lebanon      | (7.98,  | (8.59,  | (0.00,  | <0.001 | —      | —      | —       | —     | (62.18,  | (53.25,  | (-0.65, | <0.001 | (0.40, | (0.41,  | (-0.74, | <0.001 |
|              | 13.56)  | 12.69)  | 0.00)*  |        |        |        |         |       | 75.88)   | 62.80)   | -0.50)  |        | 2.42)  | 1.74)   | -0.54)  |        |
|              | 11.64   | 11.64   | 0.00    |        |        |        |         |       | 70.60    | 89.79    | 0.84    |        | 1.17   | 1.47    | 0.79    |        |
| Lesotho      | (8.16,  | (8.79,  | (0.00,  | <0.001 | —      | —      | —       | —     | (61.54,  | (81.52,  | (0.73,  | <0.001 | (0.29, | (0.59,  | (0.60,  | <0.001 |
|              | 16.23)  | 15.15)  | 0.00)*  |        |        |        |         |       | 80.72)   | 98.69)   | 0.96)   |        | 3.33)  | 3.05)   | 0.99)   |        |
|              | 11.64   | 11.64   | 0.00    |        |        |        |         |       | 87.05    | 72.97    | -0.83   |        | 1.41   | 1.19    | -0.81   |        |
| Liberia      | (8.04,  | (9.55,  | (0.00,  | <0.001 | —      | —      | —       | —     | (76.75,  | (67.59,  | (-1.17, | <0.001 | (0.39, | (0.59,  | (-1.14, | <0.001 |
|              | 16.39)  | 14.08)  | 0.00)*  |        |        |        |         |       | 98.43)   | 78.69)   | -0.49)  |        | 3.70)  | 2.16)   | -0.49)  |        |
|              | 10.48   | 10.48   | 0.00    |        |        |        |         |       | 47.78    | 37.65    | -0.88   |        | 0.74   | 0.58    | -0.88   |        |
| Libya        | (8.41,  | (8.93,  | (0.00,  | 0.006  | —      | —      | —       | —     | (43.35,  | (34.63,  | (-1.37, | 0.001  | (0.28, | (0.26,  | (-1.38, | 0.001  |
|              | 12.93)  | 12.22)  | 0.00)*  |        |        |        |         |       | 52.57)   | 40.87)   | -0.38)  |        | 1.63)  | 1.12)   | -0.38)  |        |

|                  |         |         |         |        |   |   |   |   |          |          |         |        |        |        |         |        |
|------------------|---------|---------|---------|--------|---|---|---|---|----------|----------|---------|--------|--------|--------|---------|--------|
|                  | 16.68   | 16.68   | -0.02   |        |   |   |   |   | 249.87   | 291.37   | 0.46    |        | 4.43   | 5.24   | 0.51    |        |
| Lithuania        | (13.79, | (13.01, | (-0.17, | 0.826  | — | — | — | — | (238.31, | (276.00, | (-0.50, | 0.351  | (3.01, | (3.37, | (-0.44, | 0.295  |
|                  | 20.01)  | 21.15)  | 0.14)   |        |   |   |   |   | 261.86)  | 307.46)  | 1.42)   |        | 6.30)  | 7.92)  | 1.47)   |        |
|                  | 19.16   | 19.16   | -0.00   |        |   |   |   |   | 71.52    | 32.21    | -2.68   |        | 1.14   | 0.51   | -2.74   |        |
| Luxembourg       | (10.51, | (11.76, | (-0.04, | 0.918  | — | — | — | — | (53.54,  | (22.53,  | (-3.61, | <0.001 | (0.02, | (0.00, | (-3.71, | <0.001 |
|                  | 33.02)  | 30.00)  | 0.04)   |        |   |   |   |   | 94.36)   | 45.17)   | -1.74)  |        | 8.88)  | 5.51)  | -1.76)  |        |
|                  | 11.64   | 11.64   | 0.00    |        |   |   |   |   | 209.85   | 165.22   | -0.80   |        | 3.62   | 2.84   | -0.81   |        |
| Madagascar       | (10.23, | (10.73, | (0.00,  | <0.001 | — | — | — | — | (203.46, | (161.62, | (-1.45, | 0.017  | (2.82, | (2.38, | (-1.44, | 0.013  |
|                  | 13.22)  | 12.62)  | 0.00)*  |        |   |   |   |   | 216.40)  | 168.89)  | -0.14)  |        | 4.59)  | 3.37)  | -0.17)  |        |
|                  | 11.64   | 11.64   | 0.00    |        |   |   |   |   | 58.24    | 72.83    | 0.77    |        | 1.00   | 1.25   | 0.76    |        |
| Malawi           | (10.04, | (10.52, | (-0.00, | 1.000  | — | — | — | — | (54.46,  | (69.87,  | (0.61,  | <0.001 | (0.56, | (0.88, | (0.56,  | <0.001 |
|                  | 13.45)  | 12.87)  | 0.00)   |        |   |   |   |   | 62.23)   | 75.88)   | 0.92)   |        | 1.67)  | 1.72)  | 0.97)   |        |
|                  | 13.01   | 13.01   | 0.00    |        |   |   |   |   | 67.80    | 67.47    | -0.05   |        | 1.12   | 1.12   | 0.05    |        |
| Malaysia         | (11.87, | (12.19, | (0.00,  | 0.002  | — | — | — | — | (65.13,  | (65.60,  | (-0.53, | 0.834  | (0.80, | (0.89, | (-0.27, | 0.755  |
|                  | 14.23)  | 13.87)  | 0.00)*  |        |   |   |   |   | 70.55)   | 69.38)   | 0.43)   |        | 1.53)  | 1.39)  | 0.37)   |        |
|                  | 13.01   | 13.01   | 0.00    |        |   |   |   |   | 28.91    | 21.82    | -0.82   |        | 0.48   | 0.35   | -0.88   |        |
| Maldives         | (4.15,  | (7.66,  | (0.00,  | 0.012  | — | — | — | — | (13.80,  | (14.94,  | (-1.37, | 0.004  | (0.00, | (0.00, | (-1.63, | 0.022  |
|                  | 33.46)  | 21.70)  | 0.00)*  |        |   |   |   |   | 55.21)   | 31.83)   | -0.26)  |        | 15.46) | 5.45)  | -0.13)  |        |
|                  | 11.64   | 11.64   | 0.00    |        |   |   |   |   | 75.89    | 79.22    | 0.17    |        | 1.23   | 1.29   | 0.17    |        |
| Mali             | (9.87,  | (10.53, | (0.00,  | <0.001 | — | — | — | — | (71.29,  | (76.32,  | (-0.11, | 0.230  | (0.70, | (0.94, | (-0.14, | 0.275  |
|                  | 13.67)  | 12.85)  | 0.00)*  |        |   |   |   |   | 80.73)   | 82.20)   | 0.45)   |        | 2.02)  | 1.74)  | 0.48)   |        |
|                  | 17.47   | 17.47   | 0.00    |        |   |   |   |   | 63.87    | 48.35    | -1.04   |        | 1.01   | 0.78   | -0.96   |        |
| Malta            | (9.08,  | (9.04,  | (0.00,  | <0.001 | — | — | — | — | (46.51,  | (33.54,  | (-1.49, | <0.001 | (0.01, | (0.00, | (-1.42, | <0.001 |
|                  | 30.79)  | 31.61)  | 0.00)*  |        |   |   |   |   | 85.92)   | 68.47)   | -0.58)  |        | 7.97)  | 8.96)  | -0.50)  |        |
|                  | 13.64   | 13.64   | 0.00    |        |   |   |   |   | 97.77    | 122.97   | 0.79    |        | 1.63   | 2.09   | 0.85    |        |
| Marshall Islands | (0.52,  | (1.21,  | (0.00,  | 0.001  | — | — | — | — | (41.95,  | (68.85,  | (0.64,  | <0.001 | (0.00, | (0.00, | (0.73,  | <0.001 |
|                  | 75.85)  | 55.39)  | 0.00)*  |        |   |   |   |   | 196.79)  | 203.16)  | 0.93)   |        | 55.61) | 35.30) | 0.98)   |        |
|                  | 11.64   | 11.64   | 0.00    |        |   |   |   |   | 97.81    | 65.93    | -1.31   |        | 1.59   | 1.08   | -1.27   |        |
| Mauritania       | (8.35,  | (9.29,  | (0.00,  | 0.001  | — | — | — | — | (87.84,  | (60.17,  | (-1.47, | <0.001 | (0.56, | (0.46, | (-1.43, | <0.001 |
|                  | 15.89)  | 14.46)  | 0.00)*  |        |   |   |   |   | 108.69)  | 72.14)   | -1.15)  |        | 3.68)  | 2.21)  | -1.12)  |        |
|                  | 13.01   | 13.01   | 0.00    |        |   |   |   |   | 62.48    | 137.93   | 2.95    |        | 1.07   | 2.40   | 3.00    |        |
| Mauritius        | (8.95,  | (8.81,  | (0.00,  | 1.000  | — | — | — | — | (53.07,  | (123.64, | (2.43,  | <0.001 | (0.19, | (0.87, | (2.43,  | <0.001 |
|                  | 18.32)  | 18.56)  | 0.00)   |        |   |   |   |   | 73.11)   | 153.47)  | 3.46)   |        | 3.37)  | 5.35)  | 3.57)   |        |

|                   |         |         |         |        |         |        |         |        |          |          |         |        |         |         |         |        |
|-------------------|---------|---------|---------|--------|---------|--------|---------|--------|----------|----------|---------|--------|---------|---------|---------|--------|
|                   | 11.95   | 11.95   | 0.00    |        |         |        |         |        | 22.67    | 27.97    | 0.75    |        | 0.37    | 0.46    | 0.77    |        |
| Mexico            | (11.42, | (11.52, | (0.00,  | 0.001  | —       | —      | —       | —      | (21.93,  | (27.31,  | (0.51,  | <0.001 | (0.28,  | (0.38,  | (0.43,  | <0.001 |
|                   | 12.50)  | 12.39)  | 0.00)*  |        |         |        |         |        | 23.42)   | 28.64)   | 1.00)   |        | 0.48)   | 0.55)   | 1.12)   |        |
| Micronesia        | 13.64   | 13.64   |         |        |         |        |         |        | 102.76   | 121.90   | 0.59    |        | 1.75    | 2.06    | 0.57    |        |
| (Federated States | (2.46,  | (2.70,  | —       | —      | —       | —      | —       | —      | (61.98,  | (78.74,  | (0.55,  | <0.001 | (0.00,  | (0.00,  | (0.50,  | <0.001 |
| of)               | 44.22)  | 42.62)  |         |        |         |        |         |        | 161.14)  | 181.23)  | 0.63)   |        | 25.31)  | 24.49)  | 0.64)   |        |
|                   | 17.47   | 17.47   | 0.00    |        | 17.69   |        |         |        | 118.49   | 90.67    | -0.91   |        | 1.95    | 1.51    | -0.87   |        |
| Monaco            | (0.18,  | (0.21,  | (0.00,  | <0.001 | (0.29,  | —      | —       | —      | (41.16,  | (26.14,  | (-0.96, | <0.001 | (0.00,  | (0.00,  | (-0.96, | <0.001 |
|                   | 147.20) | 118.35) | 0.00)*  |        | 146.02) |        |         |        | 289.36)  | 230.06)  | -0.86)  |        | 122.82) | 89.16)  | -0.78)  |        |
|                   | 14.23   | 14.23   | 0.00    |        |         |        |         |        | 193.97   | 225.73   | 0.52    |        | 3.39    | 3.98    | 0.56    |        |
| Mongolia          | (10.83, | (11.53, | (0.00,  | 1.000  | —       | —      | —       | —      | (179.91, | (214.95, | (-0.06, | 0.076  | (1.75,  | (2.67,  | (-0.01, | 0.054  |
|                   | 18.50)  | 17.44)  | 0.00)   |        |         |        |         |        | 208.92)  | 236.98)  | 1.10)   |        | 6.02)   | 5.80)   | 1.12)   |        |
|                   | 18.95   | 18.95   | 0.00    |        | 4.67    | 4.23   | -0.38   |        | 204.71   | 162.91   | -1.19   |        | 3.53    | 2.83    | -1.15   |        |
| Montenegro        | (12.22, | (11.64, | (0.00,  | <0.001 | (1.74,  | (1.44, | (-0.59, | <0.001 | (180.94, | (140.33, | (-2.55, | 0.087  | (1.08,  | (0.64,  | (-2.42, | 0.080  |
|                   | 28.11)  | 29.30)  | 0.00)*  |        | 10.17)  | 10.13) | -0.17)  |        | 230.78)  | 188.29)  | 0.18)   |        | 8.59)   | 8.34)   | 0.14)   |        |
|                   | 10.48   | 10.48   | 0.00    |        |         |        |         |        | 38.08    | 26.97    | -1.14   |        | 0.61    | 0.41    | -1.32   |        |
| Morocco           | (9.60,  | (9.75,  | (0.00,  | <0.001 | —       | —      | —       | —      | (36.39,  | (25.80,  | (-1.54, | <0.001 | (0.41,  | (0.28,  | (-1.71, | <0.001 |
|                   | 11.42)  | 11.25)  | 0.00)*  |        |         |        |         |        | 39.84)   | 28.19)   | -0.74)  |        | 0.88)   | 0.59)   | -0.93)  |        |
|                   | 11.64   | 11.64   | 0.00    |        |         |        |         |        | 42.26    | 68.98    | 1.75    |        | 0.73    | 1.19    | 1.75    |        |
| Mozambique        | (10.17, | (10.70, | (0.00,  | 0.001  | —       | —      | —       | —      | (39.32,  | (66.54,  | (1.53,  | <0.001 | (0.39,  | (0.89,  | (1.46,  | <0.001 |
|                   | 13.28)  | 12.66)  | 0.00)*  |        |         |        |         |        | 45.37)   | 71.49)   | 1.96)   |        | 1.26)   | 1.57)   | 2.04)   |        |
|                   | 13.01   | 13.01   | 0.00    |        |         |        |         |        | 55.40    | 53.11    | -0.14   |        | 0.93    | 0.88    | -0.19   |        |
| Myanmar           | (12.24, | (12.33, | (0.00,  | 0.014  | —       | —      | —       | —      | (53.77,  | (51.74,  | (-0.27, | 0.038  | (0.73,  | (0.71,  | (-0.31, | 0.004  |
|                   | 13.81)  | 13.71)  | 0.00)*  |        |         |        |         |        | 57.08)   | 54.52)   | -0.01)  |        | 1.17)   | 1.08)   | -0.06)  |        |
|                   | 11.64   | 11.64   | 0.00    |        |         |        |         |        | 67.96    | 78.03    | 0.50    |        | 1.12    | 1.29    | 0.52    |        |
| Namibia           | (7.78,  | (8.81,  | (0.00,  | 0.001  | —       | —      | —       | —      | (58.03,  | (70.36,  | (0.29,  | <0.001 | (0.20,  | (0.48,  | (0.30,  | <0.001 |
|                   | 16.96)  | 15.15)  | 0.00)*  |        |         |        |         |        | 79.24)   | 86.35)   | 0.71)   |        | 3.76)   | 2.84)   | 0.75)   |        |
|                   | 13.64   | 13.64   | 0.00    |        |         |        |         |        | 118.04   | 136.18   | 0.49    |        | 2.00    | 2.30    | 0.48    |        |
| Nauru             | (0.00,  | (0.00,  | (-0.00, | 1.000  | —       | —      | —       | —      | (17.67,  | (28.17,  | (0.40,  | <0.001 | (0.00,  | (0.00,  | (0.38,  | <0.001 |
|                   | 233.02) | 211.82) | 0.00)   |        |         |        |         |        | 406.38)  | 409.47)  | 0.57)   |        | 211.47) | 191.17) | 0.59)   |        |
|                   | 11.64   | 11.64   | 0.00    |        |         |        |         |        | 7.70     | 8.78     | 0.47    |        | 0.13    | 0.14    | 0.30    |        |
| Nepal             | (10.52, | (10.77, | (0.00,  | 1.000  | —       | —      | —       | —      | (6.79,   | (8.02,   | (0.30,  | <0.001 | (0.04,  | (0.06,  | (-0.10, | 0.141  |
|                   | 12.86)  | 12.58)  | 0.00)   |        |         |        |         |        | 8.70)    | 9.58)    | 0.63)   |        | 0.33)   | 0.29)   | 0.69)   |        |

|                          |         |         |         |        |        |        |         |        |          |          |         |        |         |         |         |        |
|--------------------------|---------|---------|---------|--------|--------|--------|---------|--------|----------|----------|---------|--------|---------|---------|---------|--------|
|                          | 17.47   | 17.47   | 0.00    |        |        |        |         |        | 70.47    | 25.73    | -3.44   |        | 1.14    | 0.40    | -3.55   |        |
| Netherlands              | (16.02, | (15.92, | (-0.00, | 1.000  | —      | —      | —       | —      | (67.55,  | (23.85,  | (-3.89, | <0.001 | (0.80,  | (0.20,  | (-4.01, | <0.001 |
|                          | 19.01)  | 19.13)  | 0.00)   |        |        |        |         |        | 73.49)   | 27.72)   | -3.00)  |        | 1.59)   | 0.72)   | -3.09)  |        |
|                          | 17.36   | 18.83   | 0.28    |        | 1.98   | 1.39   | -1.36   |        | 163.74   | 96.66    | -1.83   |        | 2.72    | 1.62    | -1.79   |        |
| New Zealand              | (14.39, | (15.74, | (0.20,  | <0.001 | (1.07, | (0.66, | (-2.51, | 0.022  | (154.32, | (89.50,  | (-2.35, | <0.001 | (1.63,  | (0.81,  | (-2.43, | <0.001 |
|                          | 20.77)  | 22.35)  | 0.37)   |        | 3.35)  | 2.58)  | -0.19)  |        | 173.59)  | 104.25)  | -1.31)  |        | 4.27)   | 2.88)   | -1.14)  |        |
|                          | 10.79   | 10.79   | 0.00    |        |        |        |         |        | 22.66    | 20.74    | -0.32   |        | 0.38    | 0.33    | -0.46   |        |
| Nicaragua                | (8.40,  | (9.13,  | (-0.00, | 1.000  | —      | —      | —       | —      | (19.07,  | (18.42,  | (-0.68, | 0.073  | (0.05,  | (0.10,  | (-0.85, | 0.019  |
|                          | 13.72)  | 12.68)  | 0.00)   |        |        |        |         |        | 26.78)   | 23.29)   | 0.03)   |        | 1.36)   | 0.81)   | -0.08)  |        |
|                          | 11.64   | 11.64   | 0.00    |        |        |        |         |        | 79.85    | 74.57    | -0.19   |        | 1.29    | 1.21    | -0.17   |        |
| Niger                    | (9.82,  | (10.55, | (0.00,  | 0.001  | —      | —      | —       | —      | (75.05,  | (71.79,  | (-0.43, | 0.126  | (0.74,  | (0.88,  | (-0.45, | 0.239  |
|                          | 13.74)  | 12.84)  | 0.00)*  |        |        |        |         |        | 84.90)   | 77.44)   | 0.05)   |        | 2.13)   | 1.65)   | 0.11)   |        |
|                          | 12.86   | 12.86   | 0.00    |        |        |        |         |        | 83.22    | 62.11    | -0.99   |        | 1.36    | 1.01    | -1.02   |        |
| Nigeria                  | (12.31, | (12.49, | (0.00,  | <0.001 | —      | —      | —       | —      | (81.82,  | (61.31,  | (-1.17, | <0.001 | (1.19,  | (0.91,  | (-1.19, | <0.001 |
|                          | 13.43)  | 13.23)  | 0.00)*  |        |        |        |         |        | 84.63)   | 62.92)   | -0.81)  |        | 1.56)   | 1.12)   | -0.85)  |        |
|                          | 13.64   | 13.64   | 0.00    |        |        |        |         |        | 100.66   | 89.51    | -0.43   |        | 1.70    | 1.48    | -0.50   |        |
| Niue                     | (0.00,  | (0.00,  | (0.00,  | <0.001 | —      | —      | —       | —      | (0.02,   | (0.00,   | (-0.61, | <0.001 | (0.00,  | (0.00,  | (-0.69, | <0.001 |
|                          | 1057.09 | 1493.23 | 0.00)*  |        |        |        |         |        | 1221.97) | 1636.90) | -0.24)  |        | 1034.65 | 1469.88 | -0.30)  |        |
|                          | )       | )       | 0.00)*  |        |        |        |         |        |          |          |         |        | )       | )       |         |        |
|                          | 18.95   | 18.95   | 0.00    |        |        |        |         |        | 108.57   | 115.03   | 0.18    |        | 1.83    | 1.96    | 0.22    |        |
| North Macedonia          | (15.00, | (14.90, | (0.00,  | <0.001 | —      | —      | —       | —      | (98.83,  | (105.03, | (-0.60, | 0.656  | (0.77,  | (0.87,  | (-0.59, | 0.598  |
|                          | 23.62)  | 23.88)  | 0.00)*  |        |        |        |         |        | 119.04)  | 125.85)  | 0.96)   |        | 3.67)   | 4.01)   | 1.02)   |        |
|                          | 13.64   | 13.64   | 0.00    |        |        |        |         |        | 110.95   | 113.84   | -0.14   |        | 1.88    | 1.92    | -0.13   |        |
| Northern Mariana Islands | (1.06,  | (0.25,  | (0.00,  | <0.001 | —      | —      | —       | —      | (60.17,  | (45.19,  | (-0.81, | 0.675  | (0.00,  | (0.00,  | (-0.77, | 0.682  |
|                          | 65.02)  | 101.20) | 0.00)*  |        |        |        |         |        | 193.37)  | 246.00)  | 0.53)   |        | 46.17)  | 83.14)  | 0.51)   |        |
|                          | 18.19   | 18.18   | 0.01    |        | 2.82   | 0.52   | -5.85   |        | 63.65    | 39.94    | -1.58   |        | 0.99    | 0.62    | -1.62   |        |
| Norway                   | (15.39, | (15.52, | (0.01,  | <0.001 | (1.80, | (0.17, | (-7.85, | <0.001 | (58.32,  | (35.98,  | (-2.05, | <0.001 | (0.43,  | (0.22,  | (-2.53, | 0.001  |
|                          | 21.36)  | 21.20)  | 0.01)*  |        | 4.22)  | 1.26)  | -3.81)  |        | 69.36)   | 44.25)   | -1.11)  |        | 1.96)   | 1.41)   | -0.70)  |        |
|                          | 10.48   | 10.48   | 0.00    |        |        |        |         |        | 45.47    | 43.81    | -0.12   |        | 0.71    | 0.68    | -0.11   |        |
| Oman                     | (7.85,  | (8.82,  | (-0.00, | 1.000  | —      | —      | —       | —      | (39.69,  | (40.16,  | (-0.41, | 0.442  | (0.17,  | (0.31,  | (-0.45, | 0.551  |
|                          | 13.77)  | 12.47)  | 0.00)   |        |        |        |         |        | 51.90)   | 47.80)   | 0.18)   |        | 2.03)   | 1.50)   | 0.24)   |        |
|                          | 12.86   | 12.86   | 0.00    |        |        |        |         |        | 10.75    | 16.47    | 1.51    |        | 0.18    | 0.27    | 1.45    |        |
| Pakistan                 | (12.36, | (12.53, | (0.00,  | 0.009  | —      | —      | —       | —      | (10.29,  | (16.10,  | (1.32,  | <0.001 | (0.12,  | (0.22,  | (1.30,  | <0.001 |

|                  |         |         |         |        |         |        |         |        |          |          |         |        |         |         |         |        |
|------------------|---------|---------|---------|--------|---------|--------|---------|--------|----------|----------|---------|--------|---------|---------|---------|--------|
|                  | 13.37)  | 13.20)  | 0.00)*  |        |         |        |         |        | 11.22)   | 16.86)   | 1.69)   |        | 0.25)   | 0.32)   | 1.60)   |        |
|                  | 13.64   | 13.64   | 0.00    |        |         |        |         |        | 34.99    | 35.92    | 0.09    |        | 0.59    | 0.60    | 0.08    |        |
| Palau            | (0.01,  | (0.01,  | (0.00,  | <0.001 | —       | —      | —       | —      | (1.63,   | (1.95,   | (-0.10, | 0.341  | (0.00,  | (0.00,  | (-0.22, | 0.617  |
|                  | 139.95) | 154.37) | 0.00)*  |        |         |        |         |        | 176.76)  | 189.23)  | 0.28)   |        | 116.06) | 131.67) | 0.37)   |        |
|                  | 10.48   | 10.48   | 0.00    |        | 1.95    | 3.74   | 2.75    |        | 65.62    | 42.01    | -1.52   |        | 1.04    | 0.65    | -1.60   |        |
| Palestine        | (7.38,  | (8.59,  | (0.00,  | <0.001 | (0.70,  | (2.55, | (0.01,  | 0.049  | (57.37,  | (38.11,  | (-2.08, | <0.001 | (0.25,  | (0.25,  | (-2.16, | <0.001 |
|                  | 14.64)  | 12.69)  | 0.00)*  |        | 4.48)   | 5.31)  | 5.56)   |        | 74.88)   | 46.23)   | -0.96)  |        | 3.14)   | 1.43)   | -1.05)  |        |
|                  | 10.79   | 10.79   | 0.00    |        |         |        |         |        | 65.12    | 95.64    | 1.39    |        | 1.08    | 1.61    | 1.49    |        |
| Panama           | (8.08,  | (8.65,  | (0.00,  | <0.001 | —       | —      | —       | —      | (58.11,  | (88.99,  | (0.80,  | <0.001 | (0.36,  | (0.85,  | (0.94,  | <0.001 |
|                  | 14.19)  | 13.32)  | 0.00)*  |        |         |        |         |        | 72.80)   | 102.67)  | 1.99)   |        | 2.57)   | 2.77)   | 2.05)   |        |
|                  | 13.64   | 13.64   | 0.00    |        |         |        |         |        | 53.18    | 69.20    | 0.84    |        | 0.90    | 1.17    | 0.82    |        |
| Papua New Guinea | (11.23, | (12.09, | (0.00,  | <0.001 | —       | —      | —       | —      | (48.17,  | (65.60,  | (0.61,  | <0.001 | (0.36,  | (0.74,  | (0.57,  | <0.001 |
|                  | 16.45)  | 15.34)  | 0.00)*  |        |         |        |         |        | 58.61)   | 72.96)   | 1.07)   |        | 1.92)   | 1.76)   | 1.08)   |        |
|                  | 10.79   | 10.79   | 0.00    |        |         |        |         |        | 38.88    | 31.36    | -0.68   |        | 0.66    | 0.53    | -0.74   |        |
| Paraguay         | (8.59,  | (9.20,  | (0.00,  | <0.001 | —       | —      | —       | —      | (34.52,  | (28.59,  | (-1.12, | 0.002  | (0.21,  | (0.22,  | (-1.20, | 0.002  |
|                  | 13.42)  | 12.59)  | 0.00)*  |        |         |        |         |        | 43.67)   | 34.34)   | -0.24)  |        | 1.59)   | 1.05)   | -0.27)  |        |
|                  | 10.67   | 10.67   | 0.00    |        |         |        |         |        | 32.17    | 25.13    | -0.76   |        | 0.52    | 0.41    | -0.73   |        |
| Peru             | (9.70,  | (9.91,  | (0.00,  | <0.001 | —       | —      | —       | —      | (30.47,  | (23.96,  | (-1.30, | 0.008  | (0.33,  | (0.27,  | (-1.36, | 0.024  |
|                  | 11.73)  | 11.48)  | 0.00)*  |        |         |        |         |        | 33.95)   | 26.34)   | -0.20)  |        | 0.81)   | 0.59)   | -0.10)  |        |
|                  | 14.13   | 14.10   | -0.01   |        |         |        |         |        | 18.78    | 61.12    | 4.19    |        | 0.31    | 1.03    | 4.23    |        |
| Philippines      | (13.48, | (13.63, | (-0.01, | <0.001 | —       | —      | —       | —      | (18.00,  | (60.11,  | (3.46,  | <0.001 | (0.22,  | (0.91,  | (3.32,  | <0.001 |
|                  | 14.80)  | 14.59)  | -0.01)  |        |         |        |         |        | 19.58)   | 62.14)   | 4.92)   |        | 0.43)   | 1.18)   | 5.14)   |        |
|                  | 22.10   | 22.10   | 0.02    |        | 0.29    | 0.89   | 3.86    |        | 109.47   | 104.20   | -0.22   |        | 1.86    | 1.80    | -0.18   |        |
| Poland           | (21.03, | (20.94, | (-0.04, | 0.486  | (0.19,  | (0.70, | (2.31,  | <0.001 | (107.15, | (101.86, | (-0.87, | 0.502  | (1.57,  | (1.51,  | (-0.82, | 0.594  |
|                  | 23.21)  | 23.31)  | 0.07)   |        | 0.43)   | 1.12)  | 5.43)   |        | 111.83)  | 106.58)  | 0.43)   |        | 2.19)   | 2.15)   | 0.47)   |        |
|                  | 18.92   | 18.89   | -0.01   |        |         |        |         |        | 47.17    | 28.52    | -1.69   |        | 0.76    | 0.47    | -1.61   |        |
| Portugal         | (17.01, | (16.75, | (-0.01, | <0.001 | —       | —      | —       | —      | (44.11,  | (25.95,  | (-2.47, | <0.001 | (0.42,  | (0.20,  | (-2.45, | <0.001 |
|                  | 21.00)  | 21.22)  | -0.01)  |        |         |        |         |        | 50.38)   | 31.29)   | -0.90)  |        | 1.27)   | 0.96)   | -0.77)  |        |
|                  | 10.79   | 10.79   | 0.00    |        |         |        |         |        | 88.72    | 46.96    | -2.14   |        | 1.50    | 0.79    | -2.15   |        |
| Puerto Rico      | (8.46,  | (8.23,  | (-0.00, | 1.000  | —       | —      | —       | —      | (81.68,  | (41.44,  | (-2.66, | <0.001 | (0.72,  | (0.23,  | (-2.69, | <0.001 |
|                  | 13.59)  | 13.91)  | 0.00)   |        |         |        |         |        | 96.21)   | 53.03)   | -1.61)  |        | 2.78)   | 1.95)   | -1.61)  |        |
|                  | 10.48   | 10.48   | 0.00    |        | 19.64   | 8.44   | -2.93   |        | 52.93    | 31.78    | -1.76   |        | 0.79    | 0.47    | -1.82   |        |
| Qatar            | (5.83,  | (8.41,  | (0.00,  | <0.001 | (14.07, | (7.14, | (-3.12, | <0.001 | (41.03,  | (27.90,  | (-2.14, | <0.001 | (0.02,  | (0.12,  | (-2.31, | <0.001 |

|                    |         |         |         |        |        |        |         |        |          |          |         |        |        |         |         |        |
|--------------------|---------|---------|---------|--------|--------|--------|---------|--------|----------|----------|---------|--------|--------|---------|---------|--------|
|                    | 18.59)  | 13.21)  | 0.00)*  |        | 28.17) | 10.35) | -2.74)  |        | 68.04)   | 36.30)   | -1.37)  |        | 6.24)  | 1.81)   | -1.33)  |        |
|                    | 20.82   | 20.82   | 0.00    |        | 1.87   |        |         |        | 42.01    | 26.26    | -1.62   |        | 0.64   | 0.40    | -1.62   |        |
| Republic of Korea  | (19.96, | (19.87, | (-0.00, | 1.000  | (1.61, | —      | —       | —      | (40.78,  | (25.22,  | (-1.84, | <0.001 | (0.50, | (0.28,  | (-1.90, | <0.001 |
|                    | 21.70)  | 21.80)  | 0.00)   |        | 2.17)  |        |         |        | 43.26)   | 27.33)   | -1.39)  |        | 0.82)  | 0.55)   | -1.34)  |        |
| Republic of        | 16.28   | 16.28   | 0.00    |        |        |        |         |        | 110.14   | 175.03   | 1.54    |        | 1.92   | 3.07    | 1.57    |        |
| Moldova            | (13.68, | (13.29, | (0.00,  | 0.010  | —      | —      | —       | —      | (103.41, | (165.73, | (0.36,  | 0.010  | (1.13, | (1.96,  | (0.36,  | 0.011  |
|                    | 19.26)  | 19.83)  | 0.00)*  |        |        |        |         |        | 117.22)  | 184.81)  | 2.74)   |        | 3.10)  | 4.71)   | 2.79)   |        |
|                    | 15.65   | 15.65   | -0.02   |        |        |        |         |        | 189.13   | 167.72   | -0.33   |        | 3.34   | 2.94    | -0.36   |        |
| Romania            | (14.49, | (14.23, | (-0.02, | <0.001 | —      | —      | —       | —      | (185.13, | (163.23, | (-0.92, | 0.281  | (2.83, | (2.38,  | (-0.99, | 0.271  |
|                    | 16.88)  | 17.18)  | -0.02)  |        |        |        |         |        | 193.20)  | 172.31)  | 0.27)   |        | 3.92)  | 3.61)   | 0.28)   |        |
|                    | 17.49   | 17.49   | 0.00    |        | 2.85   | 2.09   | -1.10   |        | 490.05   | 1182.73  | 3.26    |        | 8.63   | 21.13   | 3.31    |        |
| Russian Federation | (17.01, | (16.95, | (-0.00, | 1.000  | (2.68, | (1.94, | (-1.38, | <0.001 | (487.62, | (1178.73 | (2.01,  | <0.001 | (8.31, | (20.60, | (2.06,  | <0.001 |
|                    | 17.98)  | 18.04)  | 0.00)   |        | 3.04)  | 2.26)  | -0.83)  |        | 492.49)  | '        | 4.51)   |        | 8.96)  | 21.67)  | 4.57)   |        |
|                    |         |         |         |        |        |        |         |        |          | 1186.74) |         |        |        |         |         |        |
|                    | 11.64   | 11.64   | 0.00    |        |        |        |         |        | 92.71    | 76.61    | -0.66   |        | 1.60   | 1.33    | -0.63   |        |
| Rwanda             | (9.85,  | (10.36, | (0.00,  | <0.001 | —      | —      | —       | —      | (87.35,  | (73.19,  | (-0.96, | <0.001 | (0.96, | (0.91,  | (-0.91, | <0.001 |
|                    | 13.69)  | 13.05)  | 0.00)*  |        |        |        |         |        | 98.32)   | 80.16)   | -0.36)  |        | 2.52)  | 1.87)   | -0.35)  |        |
| Saint Kitts and    | 10.79   | 10.79   | 0.00    |        |        |        |         |        | 194.14   | 131.56   | -0.88   |        | 3.41   | 2.21    | -0.96   |        |
| Nevis              | (0.20,  | (0.49,  | (0.00,  | <0.001 | —      | —      | —       | —      | (109.30, | (74.00,  | (-2.19, | 0.197  | (0.00, | (0.00,  | (-2.49, | 0.229  |
|                    | 71.09)  | 55.46)  | 0.00)*  |        |        |        |         |        | 321.13)  | 218.21)  | 0.46)   |        | 58.80) | 40.61)  | 0.60)   |        |
|                    | 10.79   | 10.79   | 0.00    |        |        |        |         |        | 187.81   | 188.60   | -0.01   |        | 3.25   | 3.24    | -0.03   |        |
| Saint Lucia        | (2.00,  | (2.73,  | (0.00,  | <0.001 | —      | —      | —       | —      | (136.07, | (145.59, | (-0.78, | 0.987  | (0.03, | (0.12,  | (-0.83, | 0.951  |
|                    | 36.19)  | 29.24)  | 0.00)*  |        |        |        |         |        | 253.97)  | 240.73)  | 0.77)   |        | 25.11) | 17.55)  | 0.78)   |        |
| Saint Vincent and  | 10.79   | 10.79   | 0.00    |        |        |        |         |        | 61.29    | 75.76    | 0.69    |        | 1.05   | 1.29    | 0.67    |        |
| the Grenadines     | (1.63,  | (1.60,  | (0.00,  | <0.001 | —      | —      | —       | —      | (31.76,  | (43.31,  | (-0.04, | 0.064  | (0.00, | (0.00,  | (-0.07, | 0.076  |
|                    | 40.17)  | 36.86)  | 0.00)*  |        |        |        |         |        | 108.99)  | 123.41)  | 1.43)   |        | 25.28) | 20.95)  | 1.41)   |        |
|                    | 13.64   | 13.64   | 0.00    |        |        |        |         |        | 69.52    | 89.57    | 0.88    |        | 1.17   | 1.51    | 0.89    |        |
| Samoa              | (4.02,  | (4.78,  | (0.00,  | 0.001  | —      | —      | —       | —      | (42.68,  | (62.19,  | (0.84,  | <0.001 | (0.00, | (0.00,  | (0.77,  | <0.001 |
|                    | 36.70)  | 31.65)  | 0.00)*  |        |        |        |         |        | 108.69)  | 125.47)  | 0.92)   |        | 18.75) | 13.87)  | 1.00)   |        |
|                    | 17.47   | 17.47   | 0.00    |        |        |        |         |        | 57.71    | 51.27    | -0.40   |        | 0.92   | 0.83    | -0.35   |        |
| San Marino         | (0.20,  | (0.27,  | (-0.00, | 1.000  | —      | —      | —       | —      | (10.18,  | (8.81,   | (-0.45, | <0.001 | (0.00, | (0.00,  | (-0.39, | <0.001 |
|                    | 118.23) | 110.75) | 0.00)   |        |        |        |         |        | 183.21)  | 164.88)  | -0.35)  |        | 87.62) | 79.99)  | -0.31)  |        |
| Sao Tome and       | 11.64   | 11.64   | 0.00    | <0.001 | —      | —      | —       | —      | 65.03    | 78.59    | 0.63    | 0.058  | 1.09   | 1.25    | 0.51    | 0.162  |

|                 |         |         |         |        |         |        |         |        |          |          |         |        |        |        |         |        |
|-----------------|---------|---------|---------|--------|---------|--------|---------|--------|----------|----------|---------|--------|--------|--------|---------|--------|
| Principe        | (1.53,  | (3.74,  | (0.00,  |        |         |        |         |        | (32.73,  | (54.54,  | (-0.02, |        | (0.00, | (0.00, | (-0.20, |        |
|                 | 47.56)  | 27.88)  | 0.00)*  |        |         |        |         |        | 119.74)  | 110.11)  | 1.28)   |        | 31.71) | 12.01) | 1.23)   |        |
|                 | 10.48   | 10.48   | 0.00    |        |         |        |         |        | 52.82    | 53.72    | 0.06    |        | 0.84   | 0.86   | 0.08    |        |
| Saudi Arabia    | (9.48,  | (9.85,  | (-0.00, | 1.000  | —       | —      | —       | —      | (50.54,  | (52.34,  | (-0.08, | 0.418  | (0.57, | (0.70, | (-0.11, | 0.403  |
|                 | 11.55)  | 11.13)  | 0.00)   |        |         |        |         |        | 55.18)   | 55.14)   | 0.19)   |        | 1.19)  | 1.06)  | 0.28)   |        |
|                 | 11.64   | 11.64   | 0.00    |        |         |        |         |        | 84.14    | 83.20    | -0.15   |        | 1.36   | 1.35   | -0.12   |        |
| Senegal         | (9.79,  | (10.42, | (0.00,  | <0.001 | —       | —      | —       | —      | (79.13,  | (79.92,  | (-1.33, | 0.809  | (0.78, | (0.96, | (-1.27, | 0.834  |
|                 | 13.78)  | 12.98)  | 0.00)*  |        |         |        |         |        | 89.41)   | 86.59)   | 1.05)   |        | 2.23)  | 1.86)  | 1.03)   |        |
|                 | 17.86   | 17.86   | -0.01   |        |         |        |         |        | 113.69   | 93.29    | -0.67   |        | 1.93   | 1.61   | -0.61   |        |
| Serbia          | (15.93, | (15.74, | (-0.01, | <0.001 | —       | —      | —       | —      | (108.82, | (88.52,  | (-0.98, | <0.001 | (1.34, | (1.04, | (-0.91, | <0.001 |
|                 | 19.96)  | 20.19)  | -0.01)  |        |         |        |         |        | 118.73)  | 98.27)   | -0.35)  |        | 2.69)  | 2.40)  | -0.31)  |        |
|                 | 13.01   | 13.01   | 0.00    |        |         |        |         |        | 158.04   | 155.11   | 0.11    |        | 2.73   | 2.63   | 0.04    |        |
| Seychelles      | (1.62,  | (2.38,  | (0.00,  | <0.001 | —       | —      | —       | —      | (100.23, | (107.82, | (-0.51, | 0.731  | (0.00, | (0.01, | (-0.54, | 0.886  |
|                 | 50.75)  | 43.23)  | 0.00)*  |        |         |        |         |        | 238.82)  | 218.47)  | 0.74)   |        | 34.70) | 26.95) | 0.63)   |        |
|                 | 11.64   | 11.64   | 0.00    |        |         |        |         |        | 80.82    | 82.09    | 0.10    |        | 1.31   | 1.33   | 0.10    |        |
| Sierra Leone    | (9.10,  | (10.03, | (-0.00, | 1.000  | —       | —      | —       | —      | (73.94,  | (77.77,  | (-0.09, | 0.316  | (0.57, | (0.83, | (-0.31, | 0.641  |
|                 | 14.71)  | 13.46)  | 0.00)   |        |         |        |         |        | 88.20)   | 86.62)   | 0.28)   |        | 2.63)  | 2.06)  | 0.51)   |        |
|                 | 20.82   | 20.82   | 0.00    |        | 20.53   | 8.65   | -3.01   |        | 294.16   | 96.01    | -3.77   |        | 4.92   | 1.53   | -3.94   |        |
| Singapore       | (17.71, | (17.95, | (-0.00, | 1.000  | (17.52, | (7.06, | (-4.40, | <0.001 | (282.27, | (89.97,  | (-4.42, | <0.001 | (3.49, | (0.87, | (-4.62, | <0.001 |
|                 | 24.33)  | 24.06)  | 0.00)   |        | 23.95)  | 10.59) | -1.59)  |        | 306.44)  | 102.43)  | -3.12)  |        | 6.77)  | 2.60)  | -3.26)  |        |
|                 | 20.74   | 20.74   | -0.01   |        |         |        |         |        | 97.33    | 95.54    | -0.08   |        | 1.65   | 1.63   | -0.07   |        |
| Slovakia        | (18.06, | (17.84, | (-0.05, | 0.657  | —       | —      | —       | —      | (91.52,  | (89.54,  | (-0.89, | 0.848  | (0.97, | (0.94, | (-0.92, | 0.879  |
|                 | 23.73)  | 24.04)  | 0.03)   |        |         |        |         |        | 103.43)  | 101.91)  | 0.74)   |        | 2.63)  | 2.74)  | 0.79)   |        |
|                 | 18.92   | 18.92   | -0.01   |        | 3.84    |        |         |        | 136.46   | 28.38    | -5.34   |        | 2.37   | 0.46   | -5.55   |        |
| Slovenia        | (14.84, | (14.28, | (-0.10, | 0.870  | (2.27,  | —      | —       | —      | (125.49, | (22.94,  | (-5.92, | <0.001 | (1.14, | (0.04, | (-6.23, | <0.001 |
|                 | 23.82)  | 24.75)  | 0.08)   |        | 6.20)   |        |         |        | 148.20)  | 34.93)   | -4.75)  |        | 4.46)  | 2.39)  | -4.87)  |        |
|                 | 13.64   | 13.64   | 0.00    |        |         |        |         |        | 72.37    | 92.65    | 0.86    |        | 1.24   | 1.59   | 0.85    |        |
| Solomon Islands | (5.97,  | (8.01,  | (0.00,  | <0.001 | —       | —      | —       | —      | (51.51,  | (76.28,  | (0.73,  | <0.001 | (0.01, | (0.18, | (0.68,  | <0.001 |
|                 | 27.74)  | 21.89)  | 0.00)*  |        |         |        |         |        | 99.40)   | 111.58)  | 0.98)   |        | 10.46) | 6.05)  | 1.03)   |        |
|                 | 11.64   | 11.64   | 0.00    |        |         |        |         |        | 71.35    | 62.83    | -0.42   |        | 1.24   | 1.08   | -0.46   |        |
| Somalia         | (9.78,  | (10.57, | (0.00,  | <0.001 | —       | —      | —       | —      | (66.54,  | (60.23,  | (-0.58, | <0.001 | (0.68, | (0.76, | (-0.64, | <0.001 |
|                 | 13.78)  | 12.80)  | 0.00)*  |        |         |        |         |        | 76.42)   | 65.51)   | -0.26)  |        | 2.09)  | 1.49)  | -0.28)  |        |
| South Africa    | 12.86   | 12.86   | 0.00    | <0.001 | —       | —      | —       | —      | 115.12   | 88.46    | -0.91   | 0.011  | 1.98   | 1.50   | -1.03   | 0.003  |



|                            |         |         |         |        |         |        |         |        |          |          |         |        |        |        |         |        |
|----------------------------|---------|---------|---------|--------|---------|--------|---------|--------|----------|----------|---------|--------|--------|--------|---------|--------|
|                            | (12.05, | (12.23, | (0.00,  |        |         |        |         |        | (112.63, | (86.82,  | (-1.62, |        | (1.67, | (1.29, | (-1.71, |        |
|                            | 13.71)  | 13.51)  | 0.00)*  |        |         |        |         |        | 117.66)  | 90.14)   | -0.21)  |        | 2.35)  | 1.73)  | -0.35)  |        |
|                            | 11.64   | 11.64   | 0.00    |        |         |        |         |        | 58.55    | 48.86    | -0.55   |        | 1.02   | 0.84   | -0.60   |        |
| South Sudan                | (9.73,  | (9.92,  | (0.00,  | <0.001 | —       | —      | —       | —      | (53.88,  | (45.12,  | (-0.98, | 0.012  | (0.49, | (0.41, | (-1.01, | 0.004  |
|                            | 13.87)  | 13.60)  | 0.00)*  |        |         |        |         |        | 63.54)   | 52.85)   | -0.12)  |        | 1.92)  | 1.53)  | -0.19)  |        |
|                            | 17.47   | 17.47   | 0.00    |        |         |        |         |        | 72.47    | 48.18    | -1.46   |        | 1.16   | 0.78   | -1.41   |        |
| Spain                      | (16.53, | (16.46, | (0.00,  | <0.001 | —       | —      | —       | —      | (70.54,  | (46.53,  | (-1.93, | <0.001 | (0.93, | (0.59, | (-1.94, | <0.001 |
|                            | 18.44)  | 18.52)  | 0.00)*  |        |         |        |         |        | 74.43)   | 49.87)   | -0.98)  |        | 1.43)  | 1.03)  | -0.88)  |        |
|                            | 13.01   | 13.01   | 0.00    |        |         | 1.79   |         |        | 217.87   | 140.55   | -1.43   |        | 3.71   | 2.39   | -1.44   |        |
| Sri Lanka                  | (11.87, | (11.90, | (0.00,  | <0.001 | —       | (1.42, | —       | —      | (213.07, | (136.89, | (-2.34, | 0.002  | (3.10, | (1.94, | (-2.28, | 0.001  |
|                            | 14.23)  | 14.19)  | 0.00)*  |        |         | 2.24)  |         |        | 222.75)  | 144.28)  | -0.51)  |        | 4.40)  | 2.93)  | -0.58)  |        |
|                            | 10.48   | 10.48   | 0.00    |        |         |        |         |        | 42.30    | 36.20    | -0.55   |        | 0.68   | 0.57   | -0.60   |        |
| Sudan                      | (9.43,  | (9.79,  | (-0.00, | 1.000  | —       | —      | —       | —      | (40.17,  | (34.91,  | (-0.70, | <0.001 | (0.43, | (0.42, | (-0.71, | <0.001 |
|                            | 11.62)  | 11.21)  | 0.00)   |        |         |        |         |        | 44.52)   | 37.53)   | -0.40)  |        | 1.03)  | 0.77)  | -0.49)  |        |
|                            | 10.79   | 10.79   | 0.00    |        |         |        |         |        | 97.23    | 103.58   | 0.18    |        | 1.66   | 1.76   | 0.16    |        |
| Suriname                   | (4.75,  | (5.48,  | (0.00,  | 1.000  | —       | —      | —       | —      | (75.74,  | (85.12,  | (-1.14, | 0.790  | (0.06, | (0.19, | (-1.31, | 0.836  |
|                            | 21.94)  | 19.18)  | 0.00)   |        |         |        |         |        | 123.43)  | 124.91)  | 1.52)   |        | 9.39)  | 6.75)  | 1.64)   |        |
|                            | 19.33   | 19.42   | 0.01    |        | 26.93   | 5.90   | -4.56   |        | 110.53   | 59.06    | -2.20   |        | 1.72   | 0.91   | -2.25   |        |
| Sweden                     | (17.17, | (17.34, | (-0.01, | 0.255  | (24.38, | (4.84, | (-5.56, | <0.001 | (105.29, | (55.42,  | (-2.68, | <0.001 | (1.13, | (0.52, | (-2.78, | <0.001 |
|                            | 21.69)  | 21.68)  | 0.04)   |        | 29.70)  | 7.14)  | -3.55)  |        | 115.97)  | 62.89)   | -1.72)  |        | 2.54)  | 1.52)  | -1.72)  |        |
|                            | 13.82   | 13.82   | -0.03   |        |         |        |         |        | 54.07    | 23.31    | -2.87   |        | 0.87   | 0.37   | -2.92   |        |
| Switzerland                | (11.90, | (11.93, | (-0.09, | 0.361  | —       | —      | —       | —      | (50.23,  | (20.90,  | (-3.32, | <0.001 | (0.45, | (0.13, | (-3.46, | <0.001 |
|                            | 15.98)  | 15.94)  | 0.03)   |        |         |        |         |        | 58.15)   | 25.95)   | -2.41)  |        | 1.57)  | 0.90)  | -2.37)  |        |
|                            | 10.48   | 10.48   | 0.00    |        |         |        |         |        | 48.95    | 37.46    | -0.93   |        | 0.78   | 0.58   | -1.00   |        |
| Syrian Arab Republic       | (9.18,  | (9.11,  | (0.00,  | <0.001 | —       | —      | —       | —      | (46.14,  | (34.91,  | (-1.05, | <0.001 | (0.46, | (0.30, | (-1.19, | <0.001 |
|                            | 11.92)  | 12.03)  | 0.00)*  |        |         |        |         |        | 51.90)   | 40.18)   | -0.81)  |        | 1.26)  | 1.07)  | -0.82)  |        |
|                            | 13.81   | 12.66   | -0.31   |        |         |        |         |        | 50.87    | 65.55    | 0.83    |        | 0.81   | 1.09   | 0.96    |        |
| Taiwan (Province of China) | (12.77, | (11.56, | (-0.31, | <0.001 | —       | —      | —       | —      | (48.86,  | (63.15,  | (0.58,  | <0.001 | (0.58, | (0.80, | (0.63,  | <0.001 |
|                            | 14.92)  | 13.85)  | -0.31)  |        |         |        |         |        | 52.94)   | 68.03)   | 1.08)   |        | 1.12)  | 1.46)  | 1.29)   |        |
|                            | 14.23   | 14.23   | 0.00    |        |         |        |         |        | 25.82    | 28.46    | 0.39    |        | 0.44   | 0.49   | 0.44    |        |
| Tajikistan                 | (11.98, | (12.64, | (0.00,  | <0.001 | —       | —      | —       | —      | (22.60,  | (26.16,  | (0.20,  | <0.001 | (0.12, | (0.23, | (0.19,  | 0.001  |
|                            | 16.83)  | 15.98)  | 0.00)*  |        |         |        |         |        | 29.40)   | 30.92)   | 0.59)   |        | 1.20)  | 0.92)  | 0.68)   |        |
| Thailand                   | 13.01   | 13.01   | 0.00    | <0.001 | —       | —      | —       | —      | 21.47    | 26.93    | 1.01    | 0.070  | 0.36   | 0.45   | 1.04    | 0.071  |

|                        |         |         |         |        |        |   |   |   |          |          |         |        |         |         |         |        |
|------------------------|---------|---------|---------|--------|--------|---|---|---|----------|----------|---------|--------|---------|---------|---------|--------|
|                        | (12.39, | (12.37, | (0.00,  |        |        |   |   |   | (20.66,  | (26.03,  | (-0.08, |        | (0.26,  | (0.34,  | (-0.09, |        |
|                        | 13.65)  | 13.67)  | 0.00)*  |        |        |   |   |   | 22.31)   | 27.86)   | 2.12)   |        | 0.49)   | 0.59)   | 2.17)   |        |
|                        | 13.01   | 13.01   | 0.00    |        |        |   |   |   | 26.21    | 42.00    | 1.80    |        | 0.44    | 0.70    | 1.77    |        |
| Timor-Leste            | (8.04,  | (8.89,  | (-0.00, | 1.000  | —      | — | — | — | (18.68,  | (33.97,  | (1.03,  | <0.001 | (0.00,  | (0.05,  | (1.01,  | <0.001 |
|                        | 20.14)  | 18.64)  | 0.00)   |        |        |   |   |   | 35.92)   | 51.54)   | 2.57)   |        | 3.66)   | 3.30)   | 2.54)   |        |
|                        | 11.64   | 11.64   | 0.00    |        |        |   |   |   | 90.22    | 84.12    | -0.22   |        | 1.47    | 1.37    | -0.22   |        |
| Togo                   | (9.04,  | (9.95,  | (0.00,  | <0.001 | —      | — | — | — | (82.82,  | (79.50,  | (-0.43, | 0.052  | (0.66,  | (0.83,  | (-0.45, | 0.068  |
|                        | 14.84)  | 13.56)  | 0.00)*  |        |        |   |   |   | 98.19)   | 88.94)   | 0.00)   |        | 2.93)   | 2.14)   | 0.02)   |        |
|                        | 13.64   | 13.64   | 0.00    |        |        |   |   |   | 69.40    | 87.97    | 0.82    |        | 1.17    | 1.48    | 0.81    |        |
| Tokelau                | (0.00,  | (0.00,  | (0.00,  | 0.144  | —      | — | — | — | (0.00,   | (0.00,   | (0.78,  | <0.001 | (0.00,  | (0.00,  | (0.74,  | <0.001 |
|                        | 1608.61 | 1824.69 | 0.00)   |        |        |   |   |   | 1713.91) | 1961.22) | 0.86)   |        | 1586.06 | 1802.61 | 0.88)   |        |
|                        | )       | )       |         |        |        |   |   |   |          |          |         |        | )       | )       |         |        |
|                        | 13.64   | 13.64   | 0.00    |        |        |   |   |   | 46.68    | 57.14    | 0.71    |        | 0.78    | 0.95    | 0.67    |        |
| Tonga                  | (1.94,  | (2.22,  | (0.00,  | <0.001 | —      | — | — | — | (18.39,  | (27.18,  | (0.57,  | <0.001 | (0.00,  | (0.00,  | (0.47,  | <0.001 |
|                        | 54.53)  | 46.69)  | 0.00)*  |        |        |   |   |   | 101.95)  | 107.06)  | 0.84)   |        | 35.49)  | 26.29)  | 0.87)   |        |
|                        | 10.79   | 10.79   | 0.00    |        |        |   |   |   | 133.88   | 142.77   | 0.35    |        | 2.26    | 2.43    | 0.38    |        |
| Trinidad and<br>Tobago | (7.11,  | (7.16,  | (0.00,  | <0.001 | —      | — | — | — | (119.81, | (128.89, | (-0.12, | 0.141  | (0.79,  | (0.95,  | (-0.09, | 0.115  |
|                        | 15.79)  | 15.76)  | 0.00)*  |        |        |   |   |   | 149.20)  | 157.86)  | 0.82)   |        | 5.16)   | 5.31)   | 0.86)   |        |
|                        | 10.48   | 10.48   | 0.00    |        |        |   |   |   | 37.09    | 32.07    | -0.51   |        | 0.58    | 0.50    | -0.55   |        |
| Tunisia                | (8.98,  | (9.16,  | (-0.00, | 1.000  | —      | — | — | — | (34.22,  | (29.73,  | (-0.58, | <0.001 | (0.27,  | (0.25,  | (-0.70, | <0.001 |
|                        | 12.17)  | 11.94)  | 0.00)   |        |        |   |   |   | 40.15)   | 34.55)   | -0.44)  |        | 1.12)   | 0.91)   | -0.40)  |        |
|                        | 10.48   | 10.48   | 0.01    |        | 2.13   |   |   |   | 72.89    | 31.09    | -2.91   |        | 1.14    | 0.47    | -3.07   |        |
| Turkey                 | (9.91,  | (10.00, | (0.01,  | <0.001 | (1.87, | — | — | — | (71.39,  | (30.27,  | (-3.44, | <0.001 | (0.96,  | (0.37,  | (-3.71, | <0.001 |
|                        | 11.07)  | 10.97)  | 0.01)*  |        | 2.42)  |   |   |   | 74.40)   | 31.93)   | -2.37)  |        | 1.35)   | 0.58)   | -2.42)  |        |
|                        | 14.23   | 14.23   | 0.00    |        |        |   |   |   | 598.69   | 675.58   | 0.53    |        | 10.26   | 11.48   | 0.51    |        |
| Turkmenistan           | (11.63, | (12.08, | (0.00,  | <0.001 | —      | — | — | — | (580.61, | (660.33, | (0.17,  | 0.004  | (8.00,  | (9.57,  | (0.15,  | 0.006  |
|                        | 17.29)  | 16.67)  | 0.00)*  |        |        |   |   |   | 617.23)  | 691.11)  | 0.90)   |        | 13.01)  | 13.68)  | 0.87)   |        |
|                        | 13.64   | 13.64   | 0.00    |        |        |   |   |   | 84.56    | 116.60   | 1.11    |        | 1.43    | 1.98    | 1.12    |        |
| Tuvalu                 | (0.00,  | (0.00,  | (0.00,  | <0.001 | —      | — | — | — | (5.09,   | (22.97,  | (1.04,  | <0.001 | (0.00,  | (0.00,  | (1.03,  | <0.001 |
|                        | 272.20) | 190.59) | 0.00)*  |        |        |   |   |   | 395.61)  | 357.50)  | 1.19)   |        | 249.32) | 169.21) | 1.21)   |        |
|                        | 11.64   | 11.64   | 0.00    |        |        |   |   |   | 61.21    | 77.03    | 0.74    |        | 1.06    | 1.33    | 0.70    |        |
| Uganda                 | (10.41, | (10.85, | (0.00,  | 1.000  | —      | — | — | — | (58.17,  | (74.87,  | (0.36,  | <0.001 | (0.69,  | (1.05,  | (0.32,  | <0.001 |
|                        | 13.00)  | 12.49)  | 0.00)   |        |        |   |   |   | 64.38)   | 79.24)   | 1.11)   |        | 1.57)   | 1.65)   | 1.09)   |        |

|                                    |         |         |         |        |          |          |         |        |          |          |         |        |        |         |         |        |
|------------------------------------|---------|---------|---------|--------|----------|----------|---------|--------|----------|----------|---------|--------|--------|---------|---------|--------|
|                                    | 17.49   | 17.49   | 0.00    |        | 4.55     | 4.30     | -0.27   |        | 550.55   | 1162.99  | 2.53    | 9.81   | 20.76  | 2.53    |         |        |
| Ukraine                            | (16.65, | (16.51, | (0.00,  | <0.001 | (4.15,   | (3.90,   | (-0.44, | 0.001  | (545.99, | (1155.78 | (0.73,  | 0.006  | (9.21, | (19.81, | (0.73,  | 0.006  |
|                                    | 18.35)  | 18.51)  | 0.00)*  |        | 4.98)    | 4.74)    | -0.11)  |        | 555.14)  | 1170.25) | 4.36)   |        | 10.44) | 21.75)  | 4.37)   |        |
| United Arab Emirates               | 10.48   | 10.48   | 0.00    |        | —        | —        | —       | —      | 47.64    | 39.52    | -0.67   |        | 0.76   | 0.63    | -0.64   |        |
|                                    | (7.96,  | (8.86,  | (0.00,  | <0.001 | —        | —        | —       | —      | (41.98,  | (36.35,  | (-0.86, | <0.001 | (0.22, | (0.30,  | (-0.83, | <0.001 |
|                                    | 13.76)  | 12.37)  | 0.00)*  |        |          |          |         |        | 54.03)   | 42.95)   | -0.49)  |        | 2.27)  | 1.28)   | -0.45)  |        |
| United Kingdom                     | 18.18   | 17.40   | -0.17   |        |          | 2.49     |         |        | 87.58    | 70.33    | -0.77   |        | 1.40   | 1.13    | -0.75   |        |
|                                    | (17.37, | (16.63, | (-0.22, | <0.001 | —        | (2.21,   | —       | —      | (85.79,  | (68.79,  | (-1.02, | <0.001 | (1.18, | (0.94,  | (-1.00, | <0.001 |
|                                    | 19.02)  | 18.20)  | -0.12)  |        |          | 2.79)    |         |        | 89.40)   | 71.90)   | -0.52)  |        | 1.65)  | 1.35)   | -0.50)  |        |
| United Republic of Tanzania        | 11.64   | 11.64   | 0.00    |        | —        | —        | —       | —      | 85.13    | 75.16    | -0.46   |        | 1.47   | 1.29    | -0.47   |        |
|                                    | (10.63, | (10.98, | (0.00,  | <0.001 | —        | —        | —       | —      | (82.23,  | (73.41,  | (-0.62, | <0.001 | (1.11, | (1.07,  | (-0.65, | <0.001 |
|                                    | 12.74)  | 12.34)  | 0.00)*  |        |          |          |         |        | 88.11)   | 76.95)   | -0.30)  |        | 1.92)  | 1.54)   | -0.30)  |        |
| United States of America           | 19.15   | 19.35   | 0.05    |        | 113.60   | 135.19   | 0.63    |        | 161.12   | 122.94   | -0.96   |        | 2.53   | 1.84    | -1.11   |        |
|                                    | (18.77, | (18.99, | (-0.01, | 0.077  | (112.70, | (134.23, | (0.37,  | <0.001 | (160.03, | (122.03, | (-1.13, | <0.001 | (2.40, | (1.73,  | (-1.44, | <0.001 |
|                                    | 19.53)  | 19.72)  | 0.10)   |        | 114.51)  | 136.15)  | 0.88)   |        | 162.20)  | 123.86)  | -0.79)  |        | 2.67)  | 1.95)   | -0.78)  |        |
| United States Virgin Islands       | 10.79   | 10.79   | 0.00    |        | —        | —        | —       | —      | 232.12   | 138.82   | -1.79   |        | 3.97   | 2.40    | -1.75   |        |
|                                    | (1.30,  | (0.85,  | (0.00,  | <0.001 | —        | —        | —       | —      | (167.83, | (85.62,  | (-2.54, | <0.001 | (0.03, | (0.00,  | (-2.58, | <0.001 |
|                                    | 40.21)  | 46.56)  | 0.00)*  |        |          |          |         |        | 313.52)  | 214.00)  | -1.02)  |        | 29.04) | 32.16)  | -0.92)  |        |
| Uruguay                            | 14.47   | 14.47   | 0.00    |        | 10.13    | 4.38     | -2.85   |        | 101.37   | 64.85    | -1.49   |        | 1.67   | 1.05    | -1.54   |        |
|                                    | (11.49, | (11.58, | (0.00,  | <0.001 | (7.67,   | (2.85,   | (-4.00, | <0.001 | (93.18,  | (58.58,  | (-1.97, | <0.001 | (0.77, | (0.40,  | (-2.08, | <0.001 |
|                                    | 17.99)  | 17.86)  | 0.00)*  |        | 13.14)   | 6.45)    | -1.69)  |        | 110.08)  | 71.63)   | -1.01)  |        | 3.15)  | 2.26)   | -1.00)  |        |
| Uzbekistan                         | 14.23   | 14.23   | 0.00    |        | —        | —        | —       | —      | 27.62    | 69.14    | 3.26    |        | 0.47   | 1.18    | 3.29    |        |
|                                    | (13.11, | (13.37, | (-0.00, | 1.000  | —        | —        | —       | —      | (26.00,  | (67.23,  | (2.84,  | <0.001 | (0.28, | (0.94,  | (2.87,  | <0.001 |
|                                    | 15.43)  | 15.13)  | 0.00)   |        |          |          |         |        | 29.31)   | 71.09)   | 3.69)   |        | 0.75)  | 1.46)   | 3.71)   |        |
| Vanuatu                            | 13.64   | 13.64   | 0.00    |        | —        | —        | —       | —      | 81.01    | 115.56   | 1.23    |        | 1.38   | 1.96    | 1.17    |        |
|                                    | (3.59,  | (5.80,  | (0.00,  | 0.085  | —        | —        | —       | —      | (50.47,  | (88.88,  | (0.99,  | <0.001 | (0.00, | (0.06,  | (0.97,  | <0.001 |
|                                    | 37.00)  | 27.69)  | 0.00)   |        |          |          |         |        | 123.90)  | 148.03)  | 1.46)   |        | 18.17) | 11.06)  | 1.36)   |        |
| Venezuela (Bolivarian Republic of) | 10.79   | 10.79   | 0.00    |        | —        | —        | —       | —      | 48.35    | 29.34    | -1.44   |        | 0.81   | 0.49    | -1.50   |        |
|                                    | (9.78,  | (9.92,  | (0.00,  | 1.000  | —        | —        | —       | —      | (46.16,  | (27.89,  | (-2.03, | <0.001 | (0.55, | (0.32,  | (-2.06, | <0.001 |
|                                    | 11.89)  | 11.73)  | 0.00)   |        |          |          |         |        | 50.63)   | 30.85)   | -0.83)  |        | 1.16)  | 0.72)   | -0.93)  |        |
| Viet Nam                           | 13.01   | 13.01   | 0.00    |        | —        | —        | —       | —      | 52.47    | 50.51    | -0.13   |        | 0.89   | 0.85    | -0.16   |        |
|                                    | (12.40, | (12.51, | (0.00,  | 0.024  | —        | —        | —       | —      | (51.19,  | (49.55,  | (-0.21, | 0.002  | (0.73, | (0.73,  | (-0.30, | 0.018  |

|          |         |         |         |       |   |   |   |   |         |          |         |        |        |        |         |        |
|----------|---------|---------|---------|-------|---|---|---|---|---------|----------|---------|--------|--------|--------|---------|--------|
|          | 13.63)  | 13.52)  | 0.00)*  |       |   |   |   |   | 53.77)  | 51.49)   | -0.05)  |        | 1.08)  | 0.98)  | -0.03)  |        |
|          | 10.48   | 10.48   | 0.00    |       |   |   |   |   | 31.17   | 31.96    | 0.22    |        | 0.51   | 0.52   | 0.16    |        |
| Yemen    | (9.16,  | (9.70,  | (-0.00, | 1.000 | — | — | — | — | (28.81, | (30.59,  | (-0.09, | 0.161  | (0.25, | (0.35, | (-0.11, | 0.242  |
|          | 11.95)  | 11.30)  | 0.00)   |       |   |   |   |   | 33.68)  | 33.38)   | 0.54)   |        | 0.95)  | 0.73)  | 0.43)   |        |
|          | 11.64   | 11.64   | 0.00    |       |   |   |   |   | 50.31   | 75.24    | 1.39    |        | 0.86   | 1.30   | 1.42    |        |
| Zambia   | (9.85,  | (10.54, | (-0.00, | 1.000 | — | — | — | — | (46.31, | (72.29,  | (1.25,  | <0.001 | (0.41, | (0.94, | (1.22,  | <0.001 |
|          | 13.72)  | 12.84)  | 0.00)   |       |   |   |   |   | 54.59)  | 78.28)   | 1.54)   |        | 1.64)  | 1.77)  | 1.61)   |        |
|          | 11.64   | 11.64   | 0.00    |       |   |   |   |   | 69.85   | 104.90   | 1.39    |        | 1.12   | 1.68   | 1.39    |        |
| Zimbabwe | (10.07, | (10.41, | (0.00,  | 1.000 | — | — | — | — | (66.04, | (101.23, | (0.66,  | <0.001 | (0.68, | (1.24, | (0.59,  | 0.001  |
|          | 13.41)  | 12.99)  | 0.00)   |       |   |   |   |   | 73.84)  | 108.67)  | 2.12)   |        | 1.78)  | 2.23)  | 2.19)   |        |

**Atrial fibrillation  
and flutter  
Overall**

|                        |        |        |         |        |        |        |         |        |        |        |         |        |        |        |         |        |
|------------------------|--------|--------|---------|--------|--------|--------|---------|--------|--------|--------|---------|--------|--------|--------|---------|--------|
|                        | 1.56   | 1.71   | 0.32    |        | 5.19   | 5.66   | 0.30    |        | 0.64   | 0.68   | 0.33    |        |        |        |         |        |
| Afghanistan            | (1.10, | (1.46, | (0.24,  | <0.001 | (4.33, | (5.19, | (0.26,  | <0.001 | (0.36, | (0.53, | (0.23,  | <0.001 | —      | —      | —       | —      |
|                        | 2.16)  | 1.99)  | 0.39)   |        | 6.18)  | 6.17)  | 0.34)   |        | 1.06)  | 0.87)  | 0.43)   |        |        |        |         |        |
|                        | 2.88   | 2.91   | 0.04    |        | 9.59   | 9.61   | 0.00    |        | 1.05   | 1.08   | 0.08    |        |        |        |         |        |
| Albania                | (2.00, | (1.91, | (-0.02, | 0.236  | (7.90, | (7.69, | (-0.06, | 0.942  | (0.55, | (0.52, | (-0.11, | 0.407  | —      | —      | —       | —      |
|                        | 4.01)  | 4.25)  | 0.10)   |        | 11.53) | 11.86) | 0.07)   |        | 1.82)  | 2.01)  | 0.27)   |        |        |        |         |        |
|                        | 1.70   | 1.72   | 0.03    |        | 5.64   | 5.69   | 0.02    |        | 0.78   | 0.79   | 0.04    |        | 0.01   | 0.01   | 0.00    |        |
| Algeria                | (1.42, | (1.54, | (-0.06, | 0.505  | (5.11, | (5.36, | (-0.04, | 0.576  | (0.59, | (0.67, | (0.00,  | 0.031  | (0.00, | (0.00, | (0.00,  | <0.001 |
|                        | 2.03)  | 1.91)  | 0.11)   |        | 6.22)  | 6.04)  | 0.07)   |        | 1.01)  | 0.93)  | 0.08)   |        | 0.06)  | 0.04)  | 0.00)*  |        |
|                        | 2.48   | 2.56   | 0.07    |        | 8.24   | 8.49   | 0.08    |        | 6.18   | 7.49   | 0.67    |        | 0.10   | 0.13   | 1.03    |        |
| American Samoa         | (0.00, | (0.00, | (-0.04, | 0.218  | (0.45, | (0.55, | (-0.04, | 0.191  | (0.16, | (0.35, | (0.54,  | <0.001 | (0.00, | (0.00, | (0.74,  | <0.001 |
|                        | 28.12) | 28.26) | 0.19)   |        | 38.32) | 38.42) | 0.21)   |        | 34.67) | 36.89) | 0.80)   |        | 23.47) | 23.60) | 1.33)   |        |
|                        | 3.79   | 3.08   | -0.71   |        | 12.57  | 10.20  | -0.72   |        | 1.54   | 1.35   | -0.46   |        | 0.01   | 0.01   | 0.00    |        |
| Andorra                | (0.11, | (0.09, | (-0.79, | <0.001 | (2.96, | (2.55, | (-0.80, | <0.001 | (0.00, | (0.00, | (-0.57, | <0.001 | (0.00, | (0.00, | (0.00,  | <0.001 |
|                        | 26.20) | 23.58) | -0.64)  |        | 38.92) | 33.17) | -0.64)  |        | 22.82) | 21.15) | -0.35)  |        | 20.45) | 19.28) | 0.00)*  |        |
|                        | 1.40   | 1.44   | 0.09    |        | 4.64   | 4.79   | 0.11    |        | 0.83   | 0.93   | 0.40    |        | 0.01   | 0.01   | 0.00    |        |
| Angola                 | (1.02, | (1.20, | (0.09,  | <0.001 | (3.92, | (4.33, | (0.07,  | <0.001 | (0.55, | (0.74, | (0.24,  | <0.001 | (0.00, | (0.00, | (0.00,  | 0.002  |
|                        | 1.88)  | 1.72)  | 0.09)   |        | 5.46)  | 5.27)  | 0.14)   |        | 1.22)  | 1.15)  | 0.56)   |        | 0.13)  | 0.06)  | 0.00)*  |        |
| Antigua and<br>Barbuda | 0.93   | 0.96   | 0.13    | <0.001 | 3.09   | 3.18   | 0.09    | <0.001 | 1.19   | 0.99   | -0.59   | 0.293  | 0.02   | 0.01   | -2.74   | 0.198  |
|                        | (0.00, | (0.00, | (0.11,  |        | (0.02, | (0.13, | (0.06,  |        | (0.00, | (0.00, | (-1.67, |        | (0.00, | (0.00, | (-6.76, |        |

|            |        |        |         |        |         |         |           |        |        |        |         |        |        |        |         |        |
|------------|--------|--------|---------|--------|---------|---------|-----------|--------|--------|--------|---------|--------|--------|--------|---------|--------|
|            | 18.41) | 13.54) | 0.14)   |        | 22.47)  | 17.26)  | 0.12)     |        | 18.88) | 13.60) | 0.51)   |        | 16.58) | 11.83) | 1.46)   |        |
|            | 1.91   | 1.97   | 0.10    |        | 6.34    | 6.55    | 0.11      |        | 1.06   | 1.00   | -0.20   |        | 0.01   | 0.01   | 0.00    |        |
| Argentina  | (1.67, | (1.78, | (0.04,  | 0.002  | (5.90,  | (6.18,  | (0.08,    | <0.001 | (0.88, | (0.86, | (-0.36, | 0.018  | (0.00, | (0.00, | (-0.00, | 1.000  |
|            | 2.18)  | 2.19)  | 0.16)   |        | 6.81)   | 6.94)   | 0.13)     |        | 1.26)  | 1.15)  | -0.04)  |        | 0.05)  | 0.04)  | 0.00)   |        |
|            | 2.67   | 2.79   | 0.15    |        | 8.86    | 9.27    | 0.15      |        | 0.95   | 1.03   | 0.22    |        |        |        |         |        |
| Armenia    | (1.88, | (1.97, | (0.11,  | <0.001 | (7.34,  | (7.71,  | (0.14,    | <0.001 | (0.51, | (0.56, | (0.10,  | <0.001 | —      | —      | —       | —      |
|            | 3.69)  | 3.92)  | 0.19)   |        | 10.60)  | 11.12)  | 0.17)     |        | 1.63)  | 1.84)  | 0.34)   |        |        |        |         |        |
|            | 4.77   | 4.47   | -0.22   |        | 15.82   | 14.83   | -0.22     |        | 1.62   | 1.53   | -0.19   |        | 0.01   | 0.01   | 0.00    |        |
| Australia  | (4.28, | (4.05, | (-0.25, | <0.001 | (14.92, | (14.08, | (-0.24,   | <0.001 | (1.34, | (1.29, | (-0.44, | 0.132  | (0.00, | (0.00, | (0.00,  | <0.001 |
|            | 5.30)  | 4.92)  | -0.20)  |        | 16.77)  | 15.63)  | -0.20)    |        | 1.95)  | 1.80)  | 0.06)   |        | 0.07)  | 0.07)  | 0.00)*  |        |
|            | 3.62   | 3.83   | 0.23    |        | 11.99   | 12.69   | 0.21      |        | 1.38   | 1.44   | 0.18    |        | 0.01   | 0.01   | 0.00    |        |
| Austria    | (2.96, | (3.19, | (0.07,  | 0.004  | (10.77, | (11.50, | (0.13,    | <0.001 | (0.99, | (1.06, | (-0.25, | 0.409  | (0.00, | (0.00, | (-0.00, | 1.000  |
|            | 4.38)  | 4.58)  | 0.38)   |        | 13.33)  | 13.98)  | 0.29)     |        | 1.89)  | 1.94)  | 0.61)   |        | 0.17)  | 0.19)  | 0.00)   |        |
|            | 2.65   | 2.81   | 0.21    |        | 8.81    | 9.33    | 0.20      |        | 0.93   | 0.99   | 0.19    |        |        |        |         |        |
| Azerbaijan | (2.06, | (2.35, | (0.14,  | <0.001 | (7.68,  | (8.47,  | (0.16,    | <0.001 | (0.59, | (0.73, | (0.07,  | 0.001  | —      | —      | —       | —      |
|            | 3.37)  | 3.35)  | 0.28)   |        | 10.06)  | 10.26)  | 0.24)     |        | 1.39)  | 1.34)  | 0.30)   |        |        |        |         |        |
|            | 0.98   | 0.98   | 0.00    |        | 3.24    | 3.24    | -0.0020   |        | 1.66   | 2.02   | 0.60    |        | 0.03   | 0.03   | 0.06    |        |
| Bahamas    | (0.02, | (0.07, | (-0.05, | 0.938  | (0.70,  | (1.06,  | (-0.0023, | <0.001 | (0.15, | (0.43, | (-0.47, | 0.271  | (0.00, | (0.00, | (-0.16, | 0.595  |
|            | 5.72)  | 4.34)  | 0.06)   |        | 9.34)   | 7.68)   | -0.0018)  |        | 6.81)  | 5.95)  | 1.69)   |        | 3.96)  | 2.70)  | 0.28)   |        |
|            | 1.98   | 1.97   | -0.02   |        | 6.58    | 6.58    | -0.00     |        | 0.82   | 0.82   | 0.02    |        |        |        |         |        |
| Bahrain    | (0.68, | (1.21, | (-0.09, | 0.506  | (3.86,  | (5.17,  | (-0.04,   | 0.892  | (0.12, | (0.37, | (-0.05, | 0.537  | —      | —      | —       | —      |
|            | 4.97)  | 3.33)  | 0.05)   |        | 10.84)  | 8.51)   | 0.04)     |        | 3.38)  | 1.95)  | 0.10)   |        |        |        |         |        |
|            | 2.05   | 2.01   | -0.07   |        | 6.79    | 6.68    | -0.06     |        | 0.83   | 0.90   | 0.32    |        |        | 0.01   |         |        |
| Bangladesh | (1.89, | (1.90, | (-0.11, | 0.003  | (6.51,  | (6.48,  | (-0.08,   | <0.001 | (0.73, | (0.83, | (0.26,  | <0.001 | —      | (0.00, | —       | —      |
|            | 2.21)  | 2.13)  | -0.02)  |        | 7.09)   | 6.88)   | -0.04)    |        | 0.94)  | 0.97)  | 0.37)   |        |        | 0.02)  |         |        |
|            | 0.96   | 0.99   | 0.12    |        | 3.19    | 3.30    | 0.13      |        | 1.06   | 1.01   | -0.38   |        | 0.01   | 0.01   | -1.98   |        |
| Barbados   | (0.03, | (0.03, | (0.02,  | 0.020  | (0.75,  | (0.84,  | (0.10,    | <0.001 | (0.04, | (0.03, | (-1.32, | 0.436  | (0.00, | (0.00, | (-5.63, | 0.302  |
|            | 5.35)  | 5.76)  | 0.21)   |        | 8.84)   | 9.20)   | 0.16)     |        | 5.50)  | 5.81)  | 0.57)   |        | 3.62)  | 4.09)  | 1.82)   |        |
|            | 3.38   | 3.68   | 0.30    |        | 11.20   | 12.20   | 0.30      |        | 1.11   | 1.25   | 0.42    |        |        |        |         |        |
| Belarus    | (2.85, | (3.12, | (0.27,  | <0.001 | (10.22, | (11.16, | (0.29,    | <0.001 | (0.81, | (0.93, | (0.38,  | <0.001 | —      | —      | —       | —      |
|            | 3.98)  | 4.35)  | 0.33)   |        | 12.25)  | 13.35)  | 0.31)     |        | 1.48)  | 1.68)  | 0.46)   |        |        |        |         |        |
|            | 3.18   | 3.53   | 0.37    |        | 10.57   | 11.71   | 0.37      |        | 1.52   | 1.50   | -0.05   |        | 0.01   | 0.01   | 0.00    |        |
| Belgium    | (2.66, | (2.97, | (0.30,  | <0.001 | (9.59,  | (10.69, | (0.31,    | <0.001 | (1.17, | (1.15, | (-0.24, | 0.585  | (0.00, | (0.00, | (0.00,  | <0.001 |

|                   |        |        |         |        |        |        |         |        |        |        |         |        |        |        |         |        |
|-------------------|--------|--------|---------|--------|--------|--------|---------|--------|--------|--------|---------|--------|--------|--------|---------|--------|
|                   | 3.79)  | 4.17)  | 0.43)   |        | 11.63) | 12.81) | 0.43)   |        | 1.96)  | 1.95)  | 0.14)   |        | 0.14)  | 0.14)  | 0.00)*  |        |
|                   | 0.96   | 1.00   | 0.14    |        | 3.19   | 3.33   | 0.15    |        | 0.85   | 1.28   | 1.46    |        | 0.01   | 0.02   | 0.38    |        |
| Belize            | (0.00, | (0.08, | (0.12,  | <0.001 | (0.27, | (1.11, | (0.13,  | <0.001 | (0.00, | (0.16, | (0.77,  | <0.001 | (0.00, | (0.00, | (-0.28, | 0.252  |
|                   | 9.21)  | 4.19)  | 0.16)   |        | 13.07) | 7.66)  | 0.17)   |        | 8.98)  | 4.62)  | 2.16)   |        | 7.38)  | 2.41)  | 1.05)   |        |
|                   | 1.45   | 1.50   | 0.14    |        | 4.82   | 4.98   | 0.11    |        | 0.59   | 0.65   | 0.34    |        |        |        |         |        |
| Benin             | (0.88, | (1.13, | (0.06,  | <0.001 | (3.71, | (4.28, | (0.08,  | <0.001 | (0.25, | (0.41, | (0.11,  | 0.004  | —      | —      | —       | —      |
|                   | 2.26)  | 1.96)  | 0.21)   |        | 6.17)  | 5.77)  | 0.14)   |        | 1.17)  | 0.96)  | 0.56)   |        |        |        |         |        |
|                   | 1.02   | 1.01   | -0.05   |        | 3.40   | 3.35   | -0.06   |        | 0.84   | 0.63   | -1.21   |        | 0.01   | 0.01   | 0.00    |        |
| Bermuda           | (0.00, | (0.00, | (-0.14, | 0.361  | (0.09, | (0.04, | (-0.08, | <0.001 | (0.00, | (0.00, | (-1.34, | <0.001 | (0.00, | (0.00, | (0.00,  | <0.001 |
|                   | 21.75) | 27.66) | 0.05)   |        | 25.25) | 30.95) | -0.03)  |        | 21.47) | 27.12) | -1.08)  |        | 20.24) | 26.21) | 0.00)*  |        |
|                   | 2.12   | 2.09   | -0.06   |        | 7.05   | 6.92   | -0.07   |        | 0.77   | 0.82   | 0.28    |        |        |        |         |        |
| Bhutan            | (0.56, | (0.84, | (-0.09, | <0.001 | (3.71, | (4.40, | (-0.08, | <0.001 | (0.05, | (0.15, | (0.17,  | <0.001 | —      | —      | —       | —      |
|                   | 5.56)  | 4.32)  | -0.03)  |        | 12.16) | 10.39) | -0.05)  |        | 3.49)  | 2.53)  | 0.40)   |        |        |        |         |        |
| Bolivia           | 0.35   | 0.37   | 0.22    |        | 1.16   | 1.24   | 0.24    |        | 1.19   | 1.02   | -0.51   |        | 0.02   | 0.02   | 0.00    |        |
| (Plurinational    | (0.14, | (0.22, | (0.07,  | 0.003  | (0.74, | (0.93, | (0.17,  | <0.001 | (0.76, | (0.75, | (-0.69, | <0.001 | (0.00, | (0.00, | (0.00,  | <0.001 |
| State of)         | 0.72)  | 0.60)  | 0.36)   |        | 1.73)  | 1.61)  | 0.31)   |        | 1.76)  | 1.37)  | -0.33)  |        | 0.22)  | 0.12)  | 0.00)*  |        |
|                   | 3.12   | 3.04   | -0.09   |        | 10.35  | 10.11  | -0.08   |        | 1.51   | 1.50   | -0.12   |        | 0.01   | 0.01   | 0.00    |        |
| Bosnia and        | (2.39, | (2.14, | (-0.14, | 0.001  | (8.98, | (8.41, | (-0.11, | <0.001 | (1.01, | (0.90, | (-0.25, | 0.102  | (0.00, | (0.00, | (0.00,  | 0.339  |
| Herzegovina       | 4.01)  | 4.25)  | -0.04)  |        | 11.89) | 12.09) | -0.04)  |        | 2.17)  | 2.42)  | 0.02)   |        | 0.23)  | 0.45)  | 0.00)   |        |
|                   | 1.45   | 1.52   | 0.17    |        | 4.83   | 5.04   | 0.16    |        | 1.12   | 1.19   | 0.20    |        | 0.01   | 0.01   | 0.68    |        |
| Botswana          | (0.50, | (0.88, | (0.07,  | 0.001  | (2.85, | (3.81, | (0.11,  | <0.001 | (0.32, | (0.64, | (0.03,  | 0.025  | (0.00, | (0.00, | (-3.87, | 0.774  |
|                   | 3.30)  | 2.46)  | 0.27)   |        | 7.66)  | 6.57)  | 0.20)   |        | 2.83)  | 2.05)  | 0.38)   |        | 1.05)  | 0.41)  | 5.44)   |        |
|                   | 1.50   | 1.51   | 0.10    |        | 4.99   | 5.02   | 0.13    |        | 1.26   | 1.30   | 0.13    |        | 0.02   | 0.02   | -0.25   |        |
| Brazil            | (1.40, | (1.44, | (0.02,  | 0.022  | (4.80, | (4.88, | (0.07,  | <0.001 | (1.17, | (1.23, | (-0.18, | 0.407  | (0.01, | (0.01, | (-3.55, | 0.882  |
|                   | 1.61)  | 1.59)  | 0.19)   |        | 5.18)  | 5.17)  | 0.20)   |        | 1.36)  | 1.38)  | 0.44)   |        | 0.03)  | 0.03)  | 3.15)   |        |
|                   | 3.35   | 3.10   | -0.28   |        | 11.15  | 10.31  | -0.28   |        | 1.91   | 1.71   | -0.45   |        | 0.02   | 0.01   | -2.96   |        |
| Brunei Darussalam | (0.90, | (1.25, | (-0.33, | <0.001 | (5.92, | (6.56, | (-0.31, | <0.001 | (0.28, | (0.45, | (-0.76, | 0.004  | (0.00, | (0.00, | (-3.97, | <0.001 |
|                   | 8.73)  | 6.70)  | -0.23)  |        | 19.16) | 15.68) | -0.25)  |        | 6.57)  | 4.80)  | -0.14)  |        | 3.34)  | 2.26)  | -1.94)  |        |
|                   | 3.05   | 3.03   | -0.02   |        | 10.13  | 10.07  | -0.03   |        | 1.96   | 2.10   | 0.25    |        | 0.02   | 0.02   | 0.00    |        |
| Bulgaria          | (2.49, | (2.40, | (-0.05, | 0.171  | (9.08, | (8.90, | (-0.06, | 0.120  | (1.51, | (1.58, | (-0.04, | 0.089  | (0.00, | (0.00, | (-0.00, | 1.000  |
|                   | 3.71)  | 3.82)  | 0.01)   |        | 11.27) | 11.38) | 0.01)   |        | 2.50)  | 2.77)  | 0.55)   |        | 0.17)  | 0.29)  | 0.00)   |        |
|                   | 1.47   | 1.49   | 0.06    |        | 4.88   | 4.96   | 0.06    |        | 0.57   | 0.63   | 0.37    |        |        |        |         |        |
| Burkina Faso      | (1.02, | (1.22, | (0.03,  | <0.001 | (4.03, | (4.44, | (0.04,  | <0.001 | (0.31, | (0.45, | (0.16,  | 0.001  | —      | —      | —       | —      |

|                             |        |        |         |        |         |         |         |        |        |        |         |        |        |        |        |        |
|-----------------------------|--------|--------|---------|--------|---------|---------|---------|--------|--------|--------|---------|--------|--------|--------|--------|--------|
|                             | 2.05)  | 1.82)  | 0.10)   |        | 5.86)   | 5.52)   | 0.08)   |        | 0.97)  | 0.85)  | 0.58)   |        |        |        |        |        |
|                             | 1.00   | 1.01   | 0.06    |        | 3.30    | 3.35    | 0.06    |        | 0.93   | 0.77   | -0.65   |        | 0.01   | 0.01   | 0.00   |        |
| Burundi                     | (0.57, | (0.71, | (-0.08, | 0.398  | (2.47,  | (2.79,  | (-0.05, | 0.263  | (0.52, | (0.52, | (-0.83, | <0.001 | (0.00, | (0.00, | (0.00, | <0.001 |
|                             | 1.62)  | 1.39)  | 0.19)   |        | 4.33)   | 3.99)   | 0.17)   |        | 1.53)  | 1.11)  | -0.46)  |        | 0.26)  | 0.12)  | 0.00)* |        |
|                             | 1.49   | 1.59   | 0.24    |        | 4.95    | 5.26    | 0.21    |        | 0.77   | 0.72   | -0.25   |        | 0.01   |        |        |        |
| Cabo Verde                  | (0.06, | (0.42, | (0.21,  | <0.001 | (1.30,  | (2.78,  | (0.19,  | <0.001 | (0.00, | (0.07, | (-0.40, | 0.001  | (0.00, | —      | —      | —      |
|                             | 7.61)  | 4.18)  | 0.27)   |        | 12.99)  | 9.10)   | 0.24)   |        | 6.36)  | 2.87)  | -0.10)  |        | 4.94)  |        |        |        |
|                             | 2.25   | 2.43   | 0.26    |        | 7.47    | 8.05    | 0.26    |        | 0.95   | 1.13   | 0.62    |        | 0.01   | 0.01   | 0.00   |        |
| Cambodia                    | (1.74, | (2.07, | (0.23,  | <0.001 | (6.50,  | (7.39,  | (0.25,  | <0.001 | (0.63, | (0.89, | (0.54,  | <0.001 | (0.00, | (0.00, | (0.00, | 0.008  |
|                             | 2.87)  | 2.83)  | 0.29)   |        | 8.54)   | 8.77)   | 0.28)   |        | 1.38)  | 1.41)  | 0.69)   |        | 0.14)  | 0.07)  | 0.00)* |        |
|                             | 1.49   | 1.57   | 0.20    |        | 4.94    | 5.19    | 0.18    |        | 0.61   | 0.70   | 0.48    |        |        |        |        |        |
| Cameroon                    | (1.07, | (1.33, | (0.12,  | <0.001 | (4.15,  | (4.75,  | (0.14,  | <0.001 | (0.36, | (0.55, | (0.37,  | <0.001 | —      | —      | —      | —      |
|                             | 2.01)  | 1.84)  | 0.28)   |        | 5.84)   | 5.67)   | 0.22)   |        | 0.98)  | 0.89)  | 0.59)   |        |        |        |        |        |
|                             | 5.33   | 5.22   | -0.06   |        | 17.71   | 17.32   | -0.07   |        | 1.79   | 1.77   | -0.10   |        | 0.01   | 0.01   | 0.00   |        |
| Canada                      | (4.94, | (4.84, | (-0.10, | 0.001  | (16.98, | (16.63, | (-0.11, | 0.001  | (1.57, | (1.55, | (-0.13, | <0.001 | (0.00, | (0.00, | (0.00, | <0.001 |
|                             | 5.76)  | 5.63)  | -0.03)  |        | 18.46)  | 18.05)  | -0.03)  |        | 2.05)  | 2.02)  | -0.07)  |        | 0.05)  | 0.05)  | 0.00)* |        |
|                             | 1.42   | 1.43   | 0.02    |        | 4.73    | 4.74    | 0.01    |        | 0.82   | 0.79   | -0.14   |        | 0.01   | 0.01   | 0.00   |        |
| Central African<br>Republic | (0.71, | (0.91, | (-0.02, | 0.331  | (3.30,  | (3.74,  | (-0.01, | 0.554  | (0.31, | (0.42, | (-0.22, | <0.001 | (0.00, | (0.00, | (0.00, | 1.000  |
|                             | 2.56)  | 2.14)  | 0.07)   |        | 6.56)   | 5.92)   | 0.03)   |        | 1.76)  | 1.36)  | -0.07)  |        | 0.52)  | 0.24)  | 0.00)  |        |
|                             | 1.42   | 1.45   | 0.07    |        | 4.73    | 4.83    | 0.08    |        | 0.56   | 0.60   | 0.27    |        |        |        |        |        |
| Chad                        | (0.91, | (1.11, | (0.01,  | 0.024  | (3.73,  | (4.17,  | (0.04,  | <0.001 | (0.25, | (0.39, | (0.05,  | 0.017  | —      | —      | —      | —      |
|                             | 2.13)  | 1.88)  | 0.13)   |        | 5.91)   | 5.56)   | 0.11)   |        | 1.05)  | 0.89)  | 0.50)   |        |        |        |        |        |
|                             | 2.05   | 2.15   | 0.14    |        | 6.82    | 7.14    | 0.14    |        | 1.20   | 1.22   | 0.04    |        | 0.01   | 0.01   | 0.00   |        |
| Chile                       | (1.68, | (1.83, | (0.05,  | 0.003  | (6.11,  | (6.53,  | (0.06,  | 0.001  | (0.91, | (0.98, | (-0.22, | 0.766  | (0.00, | (0.00, | (0.00, | <0.001 |
|                             | 2.49)  | 2.52)  | 0.24)   |        | 7.58)   | 7.79)   | 0.22)   |        | 1.54)  | 1.51)  | 0.30)   |        | 0.10)  | 0.08)  | 0.00)* |        |
|                             | 2.38   | 2.51   | 0.18    |        | 7.89    | 8.34    | 0.18    |        | 0.91   | 0.93   | 0.05    |        |        |        |        |        |
| China                       | (2.34, | (2.47, | (0.11,  | <0.001 | (7.82,  | (8.27,  | (0.15,  | <0.001 | (0.89, | (0.91, | (-0.05, | 0.337  | —      | —      | —      | —      |
|                             | 2.42)  | 2.55)  | 0.25)   |        | 7.97)   | 8.42)   | 0.22)   |        | 0.94)  | 0.96)  | 0.15)   |        |        |        |        |        |
|                             | 0.99   | 1.00   | 0.03    |        | 3.30    | 3.31    | 0.02    |        | 0.87   | 0.85   | -0.11   |        | 0.01   | 0.01   | 0.00   |        |
| Colombia                    | (0.82, | (0.86, | (-0.13, | 0.729  | (2.97,  | (3.06,  | (-0.04, | 0.534  | (0.71, | (0.73, | (-0.22, | 0.068  | (0.00, | (0.00, | (0.00, | <0.001 |
|                             | 1.19)  | 1.15)  | 0.18)   |        | 3.65)   | 3.58)   | 0.07)   |        | 1.06)  | 1.00)  | 0.01)   |        | 0.05)  | 0.04)  | 0.00)* |        |
|                             | 0.93   | 0.97   | 0.17    |        | 3.09    | 3.21    | 0.13    |        | 0.84   | 0.84   | 0.02    |        | 0.01   | 0.01   | 0.00   |        |
| Comoros                     | (0.03, | (0.16, | (0.13,  | <0.001 | (0.78,  | (1.41,  | (0.11,  | <0.001 | (0.02, | (0.12, | (-1.22, | 0.972  | (0.00, | (0.00, | (0.00, | <0.001 |

|                   |        |        |         |        |         |        |         |        |        |        |         |        |        |        |         |        |
|-------------------|--------|--------|---------|--------|---------|--------|---------|--------|--------|--------|---------|--------|--------|--------|---------|--------|
|                   | 4.87)  | 3.10)  | 0.21)   |        | 8.25)   | 6.25)  | 0.16)   |        | 4.71)  | 2.90)  | 1.28)   |        | 3.18)  | 1.46)  | 0.00)*  |        |
|                   | 1.45   | 1.45   | 0.01    |        | 4.80    | 4.80   | 0.00    |        | 0.97   | 0.92   | -0.10   |        | 0.01   | 0.01   | 0.00    |        |
| Congo             | (0.69, | (0.97, | (-0.04, | 0.658  | (3.29,  | (3.89, | (-0.02, | 0.745  | (0.38, | (0.55, | (-0.37, | 0.489  | (0.00, | (0.00, | (0.00,  | <0.001 |
|                   | 2.67)  | 2.08)  | 0.06)   |        | 6.76)   | 5.86)  | 0.03)   |        | 2.05)  | 1.45)  | 0.18)   |        | 0.58)  | 0.20)  | 0.00)*  |        |
|                   | 2.41   | 2.47   | 0.08    |        | 8.01    | 8.18   | 0.07    |        | 7.87   | 7.14   | -0.35   |        | 0.13   | 0.12   | -0.26   |        |
| Cook Islands      | (0.00, | (0.00, | (0.01,  | 0.028  | (0.01,  | (0.01, | (0.02,  | 0.012  | (0.01, | (0.00, | (-0.42, | <0.001 | (0.00, | (0.00, | (-0.48, | 0.021  |
|                   | 65.21) | 71.53) | 0.15)   |        | 75.43)  | 82.44) | 0.13)   |        | 75.40) | 80.57) | -0.28)  |        | 60.78) | 66.79) | -0.04)  |        |
|                   | 1.01   | 1.00   | -0.04   |        | 3.35    | 3.33   | -0.02   |        | 0.56   | 0.58   | 0.22    |        |        | 0.01   |         |        |
| Costa Rica        | (0.50, | (0.61, | (-0.10, | 0.216  | (2.34,  | (2.58, | (-0.05, | 0.320  | (0.21, | (0.29, | (0.03,  | 0.026  | —      | (0.00, | —       | —      |
|                   | 1.81)  | 1.57)  | 0.02)   |        | 4.64)   | 4.25)  | 0.02)   |        | 1.22)  | 1.04)  | 0.42)   |        |        | 0.23)  |         |        |
|                   | 1.52   | 1.53   | 0.03    |        | 5.03    | 5.09   | 0.05    |        | 0.60   | 0.63   | 0.20    |        |        |        |         |        |
| Cote d'Ivoire     | (1.14, | (1.29, | (-0.05, | 0.435  | (4.31,  | (4.64, | (0.02,  | <0.001 | (0.37, | (0.48, | (-0.01, | 0.065  | —      | —      | —       | —      |
|                   | 1.98)  | 1.80)  | 0.11)   |        | 5.84)   | 5.56)  | 0.07)   |        | 0.92)  | 0.81)  | 0.41)   |        |        |        |         |        |
|                   | 2.89   | 2.90   | 0.01    |        | 9.62    | 9.61   | -0.01   |        | 1.23   | 1.12   | -0.35   |        | 0.01   | 0.01   | 0.00    |        |
| Croatia           | (2.21, | (2.12, | (-0.05, | 0.669  | (8.34,  | (8.17, | (-0.05, | 0.528  | (0.80, | (0.66, | (-0.48, | <0.001 | (0.00, | (0.00, | (0.00,  | <0.001 |
|                   | 3.74)  | 3.92)  | 0.07)   |        | 11.05)  | 11.29) | 0.03)   |        | 1.82)  | 1.84)  | -0.21)  |        | 0.25)  | 0.39)  | 0.00)*  |        |
|                   | 0.96   | 0.98   | 0.05    |        | 3.19    | 3.25   | 0.06    |        | 0.91   | 0.77   | -0.61   |        | 0.01   | 0.01   | 0.00    |        |
| Cuba              | (0.68, | (0.69, | (-0.03, | 0.188  | (2.65,  | (2.70, | (0.03,  | <0.001 | (0.64, | (0.52, | (-0.95, | <0.001 | (0.00, | (0.00, | (0.00,  | <0.001 |
|                   | 1.32)  | 1.36)  | 0.13)   |        | 3.80)   | 3.89)  | 0.10)   |        | 1.26)  | 1.11)  | -0.27)  |        | 0.12)  | 0.13)  | 0.00)*  |        |
|                   | 3.37   | 2.96   | -0.44   |        | 11.16   | 9.77   | -0.46   |        | 1.27   | 1.10   | -0.47   |        | 0.01   |        |         |        |
| Cyprus            | (1.65, | (1.79, | (-0.64, | <0.001 | (7.76,  | (7.54, | (-0.63, | <0.001 | (0.34, | (0.45, | (-0.70, | <0.001 | (0.00, | —      | —       | —      |
|                   | 6.17)  | 4.91)  | -0.24)  |        | 15.61)  | 12.71) | -0.28)  |        | 3.34)  | 2.64)  | -0.24)  |        | 1.34)  |        |         |        |
|                   | 3.24   | 3.31   | 0.09    |        | 10.75   | 10.98  | 0.09    |        | 1.19   | 1.15   | -0.08   |        | 0.01   |        |         |        |
| Czechia           | (2.72, | (2.77, | (0.02,  | 0.009  | (9.80,  | (9.99, | (0.04,  | <0.001 | (0.89, | (0.84, | (-0.24, | 0.315  | (0.00, | —      | —       | —      |
|                   | 3.84)  | 3.94)  | 0.15)   |        | 11.77)  | 12.06) | 0.13)   |        | 1.57)  | 1.56)  | 0.08)   |        | 0.12)  |        |         |        |
| Democratic        | 2.38   | 2.41   | 0.04    |        | 7.89    | 7.99   | 0.04    |        | 0.91   | 0.94   | 0.15    |        |        |        |         |        |
| People's Republic | (2.03, | (2.12, | (-0.02, | 0.173  | (7.25,  | (7.46, | (0.02,  | 0.002  | (0.70, | (0.77, | (0.07,  | <0.001 | —      | —      | —       | —      |
| of Korea          | 2.77)  | 2.72)  | 0.11)   |        | 8.58)   | 8.54)  | 0.07)   |        | 1.17)  | 1.15)  | 0.23)   |        |        |        |         |        |
| Democratic        | 1.41   | 1.40   | -0.01   |        | 4.68    | 4.65   | -0.02   |        | 0.89   | 0.88   | 0.01    |        | 0.01   | 0.01   | 0.00    |        |
| Republic of the   | (1.19, | (1.26, | (-0.05, | 0.808  | (4.27,  | (4.39, | (-0.05, | 0.287  | (0.72, | (0.77, | (-0.21, | 0.914  | (0.00, | (0.00, | (0.00,  | <0.001 |
| Congo             | 1.65)  | 1.55)  | 0.04)   |        | 5.11)   | 4.91)  | 0.02)   |        | 1.09)  | 1.00)  | 0.23)   |        | 0.05)  | 0.03)  | 0.00)*  |        |
|                   | 3.44   | 2.95   | -0.54   |        | 11.42   | 9.77   | -0.54   |        | 1.46   | 1.20   | -0.71   |        | 0.01   | 0.01   | 0.00    |        |
| Denmark           | (2.68, | (2.21, | (-0.56, | <0.001 | (10.00, | (8.39, | (-0.56, | <0.001 | (0.98, | (0.75, | (-0.87, | <0.001 | (0.00, | (0.00, | (0.00,  | <0.001 |



|                   |        |        |         |        |        |        |         |        |        |        |         |        |        |        |         |        |
|-------------------|--------|--------|---------|--------|--------|--------|---------|--------|--------|--------|---------|--------|--------|--------|---------|--------|
|                   | 4.36)  | 3.86)  | -0.51)  |        | 12.99) | 11.31) | -0.51)  |        | 2.10)  | 1.83)  | -0.56)  |        | 0.24)  | 0.25)  | 0.00)*  |        |
|                   | 0.95   | 0.96   | 0.06    |        | 3.13   | 3.19   | 0.08    |        | 0.90   | 0.82   | -0.28   |        | 0.01   | 0.01   | 0.00    |        |
| Djibouti          | (0.06, | (0.31, | (-0.03, | 0.196  | (0.94, | (1.85, | (0.04,  | <0.001 | (0.05, | (0.24, | (-0.57, | 0.072  | (0.00, | (0.00, | (0.00,  | <0.001 |
|                   | 4.33)  | 2.27)  | 0.15)   |        | 7.66)  | 5.16)  | 0.11)   |        | 4.24)  | 2.08)  | 0.03)   |        | 2.64)  | 0.80)  | 0.00)*  |        |
|                   | 0.99   | 1.00   | 0.04    |        | 3.28   | 3.33   | 0.05    |        | 1.37   | 1.35   | -0.12   |        | 0.02   | 0.02   | 0.00    |        |
| Dominica          | (0.00, | (0.00, | (-0.01, | 0.114  | (0.03, | (0.05, | (0.02,  | 0.006  | (0.00, | (0.00, | (-0.35, | 0.313  | (0.00, | (0.00, | (-0.00, | 1.000  |
|                   | 18.50) | 16.67) | 0.09)   |        | 22.79) | 20.99) | 0.09)   |        | 19.22) | 17.33) | 0.11)   |        | 16.56) | 14.70) | 0.00)   |        |
| Dominican         | 0.94   | 1.00   | 0.21    |        | 3.13   | 3.32   | 0.20    |        | 0.75   | 0.85   | 0.43    |        | 0.01   | 0.01   | 0.00    |        |
| Republic          | (0.59, | (0.72, | (0.09,  | 0.001  | (2.45, | (2.79, | (0.15,  | <0.001 | (0.45, | (0.60, | (0.18,  | 0.001  | (0.00, | (0.00, | (0.00,  | <0.001 |
|                   | 1.43)  | 1.35)  | 0.32)   |        | 3.95)  | 3.91)  | 0.25)   |        | 1.20)  | 1.17)  | 0.69)   |        | 0.18)  | 0.11)  | 0.00)*  |        |
|                   | 0.25   | 0.38   | 1.47    |        | 0.83   | 1.24   | 1.39    |        | 1.19   | 1.41   | 0.55    |        | 0.02   | 0.02   | 0.00    |        |
| Ecuador           | (0.11, | (0.24, | (1.12,  | <0.001 | (0.55, | (0.99, | (1.17,  | <0.001 | (0.85, | (1.14, | (0.06,  | 0.027  | (0.00, | (0.00, | (0.00,  | <0.001 |
|                   | 0.49)  | 0.55)  | 1.81)   |        | 1.21)  | 1.54)  | 1.62)   |        | 1.62)  | 1.72)  | 1.03)   |        | 0.15)  | 0.10)  | 0.00)*  |        |
|                   | 1.69   | 1.76   | 0.14    |        | 5.60   | 5.85   | 0.14    |        | 0.83   | 0.88   | 0.16    |        | 0.01   | 0.01   | 0.00    |        |
| Egypt             | (1.51, | (1.63, | (0.09,  | <0.001 | (5.26, | (5.62, | (0.12,  | <0.001 | (0.71, | (0.79, | (0.09,  | <0.001 | (0.00, | (0.00, | (-0.00, | 1.000  |
|                   | 1.89)  | 1.90)  | 0.20)   |        | 5.96)  | 6.10)  | 0.17)   |        | 0.98)  | 0.98)  | 0.22)   |        | 0.03)  | 0.02)  | 0.00)   |        |
|                   | 0.94   | 0.95   | 0.05    |        | 3.13   | 3.16   | 0.04    |        | 0.65   | 0.65   | 0.07    |        | 0.01   | 0.01   | 0.00    |        |
| El Salvador       | (0.52, | (0.59, | (-0.05, | 0.292  | (2.30, | (2.46, | (-0.01, | 0.132  | (0.31, | (0.36, | (-0.39, | 0.757  | (0.00, | (0.00, | (0.00,  | <0.001 |
|                   | 1.57)  | 1.46)  | 0.15)   |        | 4.15)  | 3.99)  | 0.08)   |        | 1.19)  | 1.09)  | 0.54)   |        | 0.26)  | 0.18)  | 0.00)*  |        |
|                   | 1.40   | 1.50   | 0.23    |        | 4.64   | 4.97   | 0.24    |        | 0.81   | 0.92   | 0.50    |        | 0.01   | 0.01   | 0.00    |        |
| Equatorial Guinea | (0.13, | (0.60, | (0.17,  | <0.001 | (1.65, | (3.12, | (0.22,  | <0.001 | (0.02, | (0.26, | (0.42,  | <0.001 | (0.00, | (0.00, | (0.00,  | 0.119  |
|                   | 5.60)  | 3.13)  | 0.30)   |        | 10.35) | 7.52)  | 0.26)   |        | 4.63)  | 2.32)  | 0.58)   |        | 3.14)  | 0.86)  | 0.00)   |        |
|                   | 0.91   | 0.94   | 0.12    |        | 3.02   | 3.11   | 0.11    |        | 0.81   | 0.89   | 0.32    |        | 0.01   | 0.01   | 0.00    |        |
| Eritrea           | (0.39, | (0.58, | (0.07,  | <0.001 | (1.97, | (2.42, | (0.06,  | <0.001 | (0.33, | (0.55, | (0.17,  | <0.001 | (0.00, | (0.00, | (0.00,  | <0.001 |
|                   | 1.81)  | 1.43)  | 0.17)   |        | 4.44)  | 3.93)  | 0.17)   |        | 1.68)  | 1.37)  | 0.47)   |        | 0.46)  | 0.19)  | 0.00)*  |        |
|                   | 3.29   | 3.67   | 0.38    |        | 10.92  | 12.17  | 0.37    |        | 1.10   | 1.22   | 0.35    |        |        |        |         |        |
| Estonia           | (2.04, | (2.20, | (0.34,  | <0.001 | (8.50, | (9.33, | (0.35,  | <0.001 | (0.44, | (0.46, | (0.27,  | <0.001 | —      | —      | —       | —      |
|                   | 5.10)  | 6.02)  | 0.41)   |        | 13.85) | 15.82) | 0.40)   |        | 2.35)  | 2.96)  | 0.44)   |        |        |        |         |        |
|                   | 1.46   | 1.48   | 0.05    |        | 4.86   | 4.91   | 0.05    |        | 0.97   | 1.16   | 0.63    |        | 0.01   | 0.01   | 0.00    |        |
| Eswatini          | (0.31, | (0.56, | (-0.04, | 0.257  | (2.33, | (3.03, | (0.00,  | 0.034  | (0.12, | (0.38, | (0.41,  | <0.001 | (0.00, | (0.00, | (0.00,  | <0.001 |
|                   | 4.26)  | 3.16)  | 0.13)   |        | 8.94)  | 7.52)  | 0.09)   |        | 3.51)  | 2.73)  | 0.86)   |        | 1.84)  | 0.91)  | 0.00)*  |        |
|                   | 0.94   | 0.98   | 0.14    |        | 3.11   | 3.24   | 0.14    |        | 0.80   | 0.76   | -0.21   |        | 0.01   | 0.01   | 0.00    |        |
| Ethiopia          | (0.78, | (0.87, | (0.08,  | <0.001 | (2.82, | (3.05, | (0.11,  | <0.001 | (0.66, | (0.67, | (-0.34, | 0.002  | (0.00, | (0.00, | (0.00,  | <0.001 |

|           |        |        |         |        |         |         |         |        |        |        |         |        |        |        |         |        |
|-----------|--------|--------|---------|--------|---------|---------|---------|--------|--------|--------|---------|--------|--------|--------|---------|--------|
|           | 1.11)  | 1.09)  | 0.21)   |        | 3.41)   | 3.44)   | 0.18)   |        | 0.96)  | 0.86)  | -0.08)  |        | 0.04)  | 0.03)  | 0.00)*  |        |
|           | 2.43   | 2.52   | 0.12    |        | 8.08    | 8.37    | 0.12    |        | 5.99   | 7.21   | 0.64    |        | 0.10   | 0.12   | 0.62    |        |
| Fiji      | (0.96, | (1.18, | (0.07,  | <0.001 | (5.07,  | (5.70,  | (0.09,  | <0.001 | (3.48, | (4.74, | (0.48,  | <0.001 | (0.00, | (0.00, | (0.62,  | <0.001 |
|           | 5.09)  | 4.76)  | 0.18)   |        | 12.22)  | 11.89)  | 0.14)   |        | 9.65)  | 10.53) | 0.79)   |        | 1.56)  | 1.29)  | 0.62)   |        |
|           | 3.62   | 3.20   | -0.42   |        | 12.02   | 10.63   | -0.42   |        | 1.38   | 1.15   | -0.61   |        | 0.01   |        |         |        |
| Finland   | (2.87, | (2.46, | (-0.44, | <0.001 | (10.62, | (9.24,  | (-0.44, | <0.001 | (0.94, | (0.73, | (-0.69, | <0.001 | (0.00, | —      | —       | —      |
|           | 4.55)  | 4.13)  | -0.41)  |        | 13.58)  | 12.20)  | -0.40)  |        | 2.01)  | 1.77)  | -0.54)  |        | 0.28)  |        |         |        |
|           | 3.66   | 3.04   | -0.63   |        | 12.15   | 10.11   | -0.63   |        | 1.45   | 1.19   | -0.70   |        | 0.01   | 0.01   | 0.00    |        |
| France    | (3.42, | (2.82, | (-0.66, | <0.001 | (11.71, | (9.70,  | (-0.64, | <0.001 | (1.30, | (1.05, | (-0.77, | <0.001 | (0.00, | (0.00, | (0.00,  | <0.001 |
|           | 3.91)  | 3.28)  | -0.61)  |        | 12.59)  | 10.53)  | -0.62)  |        | 1.61)  | 1.34)  | -0.62)  |        | 0.03)  | 0.03)  | 0.00)*  |        |
|           | 1.47   | 1.47   | 0.01    |        | 4.87    | 4.89    | 0.01    |        | 1.01   | 0.99   | -0.09   |        | 0.01   | 0.01   | 0.00    |        |
| Gabon     | (0.43, | (0.69, | (-0.08, | 0.915  | (2.70,  | (3.33,  | (-0.02, | 0.407  | (0.21, | (0.38, | (-0.29, | 0.357  | (0.00, | (0.00, | (0.00,  | <0.001 |
|           | 3.61)  | 2.75)  | 0.09)   |        | 8.10)   | 6.93)   | 0.04)   |        | 2.95)  | 2.11)  | 0.10)   |        | 1.27)  | 0.60)  | 0.00)*  |        |
|           | 1.49   | 1.52   | 0.07    |        | 4.96    | 5.04    | 0.06    |        | 0.56   | 0.64   | 0.45    |        |        |        |         |        |
| Gambia    | (0.41, | (0.76, | (0.03,  | 0.001  | (2.65,  | (3.53,  | (0.04,  | <0.001 | (0.04, | (0.20, | (0.26,  | <0.001 | —      | —      | —       | —      |
|           | 3.84)  | 2.73)  | 0.12)   |        | 8.47)   | 6.99)   | 0.07)   |        | 2.43)  | 1.55)  | 0.65)   |        |        |        |         |        |
|           | 2.73   | 2.90   | 0.20    |        | 9.07    | 9.62    | 0.20    |        | 1.16   | 1.45   | 0.70    |        | 0.01   | 0.01   | 0.00    |        |
| Georgia   | (2.08, | (2.08, | (0.15,  | <0.001 | (7.83,  | (8.07,  | (0.18,  | <0.001 | (0.75, | (0.89, | (0.40,  | <0.001 | (0.00, | (0.00, | (0.00,  | 0.002  |
|           | 3.53)  | 4.00)  | 0.25)   |        | 10.44)  | 11.44)  | 0.22)   |        | 1.72)  | 2.29)  | 1.01)   |        | 0.20)  | 0.43)  | 0.00)*  |        |
|           | 4.01   | 3.44   | -0.51   |        | 13.31   | 11.39   | -0.51   |        | 2.21   | 1.82   | -0.69   |        | 0.02   | 0.02   | 0.00    |        |
| Germany   | (3.80, | (3.23, | (-0.56, | <0.001 | (12.91, | (11.01, | (-0.56, | <0.001 | (2.05, | (1.67, | (-0.99, | <0.001 | (0.01, | (0.00, | (0.00,  | <0.001 |
|           | 4.24)  | 3.65)  | -0.45)  |        | 13.72)  | 11.77)  | -0.47)  |        | 2.38)  | 1.98)  | -0.38)  |        | 0.05)  | 0.04)  | 0.00)*  |        |
|           | 1.54   | 1.56   | 0.06    |        | 5.11    | 5.19    | 0.06    |        | 0.60   | 0.66   | 0.36    |        |        |        |         |        |
| Ghana     | (1.20, | (1.35, | (-0.00, | 0.064  | (4.47,  | (4.78,  | (0.04,  | <0.001 | (0.40, | (0.52, | (0.31,  | <0.001 | —      | —      | —       | —      |
|           | 1.95)  | 1.81)  | 0.12)   |        | 5.82)   | 5.62)   | 0.07)   |        | 0.87)  | 0.82)  | 0.41)   |        |        |        |         |        |
|           | 3.33   | 2.85   | -0.54   |        | 11.06   | 9.46    | -0.54   |        | 2.12   | 1.95   | -0.26   |        | 0.02   | 0.02   | 0.00    |        |
| Greece    | (2.78, | (2.34, | (-0.57, | <0.001 | (10.04, | (8.53,  | (-0.56, | <0.001 | (1.69, | (1.53, | (-0.43, | 0.002  | (0.00, | (0.00, | (0.00,  | <0.001 |
|           | 3.96)  | 3.46)  | -0.50)  |        | 12.16)  | 10.49)  | -0.51)  |        | 2.64)  | 2.47)  | -0.09)  |        | 0.14)  | 0.19)  | 0.00)*  |        |
|           | 5.57   | 5.15   | -0.26   |        | 18.52   | 17.09   | -0.27   |        | 2.13   | 1.88   | -0.41   |        | 0.01   | 0.01   | 0.00    |        |
| Greenland | (0.35, | (0.17, | (-0.35, | <0.001 | (5.67,  | (4.26,  | (-0.35, | <0.001 | (0.00, | (0.00, | (-0.51, | <0.001 | (0.00, | (0.00, | (0.00,  | 0.100  |
|           | 30.50) | 31.01) | -0.17)  |        | 48.96)  | 48.83)  | -0.20)  |        | 25.38) | 25.74) | -0.31)  |        | 22.09) | 22.55) | 0.00)   |        |
|           | 0.96   | 0.99   | 0.10    |        | 3.18    | 3.30    | 0.13    |        | 1.46   | 1.14   | -0.87   |        | 0.02   | 0.02   | -0.39   |        |
| Grenada   | (0.00, | (0.00, | (0.04,  | 0.002  | (0.05,  | (0.13,  | (0.10,  | <0.001 | (0.00, | (0.00, | (-1.63, | 0.025  | (0.00, | (0.00, | (-0.78, | 0.058  |

|               |        |        |         |        |         |        |         |        |        |        |         |        |        |        |         |        |
|---------------|--------|--------|---------|--------|---------|--------|---------|--------|--------|--------|---------|--------|--------|--------|---------|--------|
|               | 15.94) | 12.72) | 0.16)   |        | 20.04)  | 16.87) | 0.16)   |        | 16.84) | 12.98) | -0.11)  |        | 14.09) | 10.79) | 0.01)   |        |
|               | 2.38   | 2.52   | 0.20    |        | 7.88    | 8.34   | 0.19    |        | 4.82   | 6.58   | 1.13    |        | 0.08   | 0.11   | 1.21    |        |
| Guam          | (0.15, | (0.15, | (0.15,  | <0.001 | (2.42,  | (2.55, | (0.17,  | <0.001 | (0.95, | (1.65, | (0.29,  | 0.008  | (0.00, | (0.00, | (0.30,  | 0.009  |
|               | 10.77) | 11.28) | 0.25)   |        | 19.11)  | 20.11) | 0.22)   |        | 14.59) | 17.56) | 1.97)   |        | 6.66)  | 6.90)  | 2.13)   |        |
|               | 0.95   | 0.95   | 0.02    |        | 3.15    | 3.16   | 0.01    |        | 0.69   | 0.60   | -0.47   |        | 0.01   | 0.01   | 0.00    |        |
| Guatemala     | (0.60, | (0.73, | (-0.05, | 0.676  | (2.47,  | (2.75, | (-0.02, | 0.427  | (0.40, | (0.43, | (-1.12, | 0.165  | (0.00, | (0.00, | (0.00,  | 0.115  |
|               | 1.44)  | 1.22)  | 0.08)   |        | 3.96)   | 3.63)  | 0.05)   |        | 1.12)  | 0.82)  | 0.19)   |        | 0.18)  | 0.07)  | 0.00)   |        |
|               | 1.40   | 1.42   | 0.07    |        | 4.65    | 4.71   | 0.06    |        | 0.57   | 0.61   | 0.29    |        |        |        |         |        |
| Guinea        | (0.91, | (1.06, | (-0.00, | 0.065  | (3.70,  | (4.03, | (0.02,  | 0.003  | (0.28, | (0.39, | (0.25,  | <0.001 | —      | —      | —       | —      |
|               | 2.07)  | 1.86)  | 0.13)   |        | 5.78)   | 5.47)  | 0.09)   |        | 1.05)  | 0.92)  | 0.33)   |        |        |        |         |        |
|               | 1.46   | 1.49   | 0.08    |        | 4.84    | 4.94   | 0.07    |        | 0.58   | 0.64   | 0.32    |        |        |        |         |        |
| Guinea-Bissau | (0.41, | (0.70, | (0.03,  | 0.001  | (2.61,  | (3.35, | (0.04,  | <0.001 | (0.05, | (0.18, | (0.21,  | <0.001 | —      | —      | —       | —      |
|               | 3.70)  | 2.79)  | 0.12)   |        | 8.20)   | 7.02)  | 0.10)   |        | 2.37)  | 1.64)  | 0.42)   |        |        |        |         |        |
|               | 0.98   | 0.98   | -0.04   |        | 3.25    | 3.25   | -0.01   |        | 1.57   | 2.04   | 0.95    |        | 0.02   | 0.03   | 1.39    |        |
| Guyana        | (0.17, | (0.18, | (-0.08, | 0.051  | (1.46,  | (1.47, | (-0.06, | 0.806  | (0.46, | (0.71, | (0.31,  | 0.004  | (0.00, | (0.00, | (1.39,  | <0.001 |
|               | 3.09)  | 3.05)  | 0.00)   |        | 6.28)   | 6.22)  | 0.04)   |        | 3.93)  | 4.58)  | 1.59)   |        | 1.47)  | 1.43)  | 1.39)   |        |
|               | 0.93   | 0.93   | -0.02   |        | 3.08    | 3.09   | 0.01    |        | 1.13   | 1.12   | -0.03   |        | 0.02   | 0.02   | -0.47   |        |
| Haiti         | (0.56, | (0.68, | (-0.11, | 0.578  | (2.37,  | (2.62, | (-0.03, | 0.699  | (0.72, | (0.85, | (-0.28, | 0.792  | (0.00, | (0.00, | (-3.77, | 0.782  |
|               | 1.45)  | 1.24)  | 0.06)   |        | 3.94)   | 3.63)  | 0.05)   |        | 1.69)  | 1.45)  | 0.21)   |        | 0.21)  | 0.11)  | 2.93)   |        |
|               | 0.96   | 0.96   | 0.01    |        | 3.18    | 3.17   | -0.01   |        | 0.57   | 0.47   | -0.65   |        | 0.01   |        |         |        |
| Honduras      | (0.51, | (0.66, | (-0.05, | 0.782  | (2.29,  | (2.60, | (-0.04, | 0.547  | (0.24, | (0.27, | (-0.75, | <0.001 | (0.00, | —      | —       | —      |
|               | 1.65)  | 1.34)  | 0.06)   |        | 4.30)   | 3.83)  | 0.02)   |        | 1.15)  | 0.77)  | -0.55)  |        | 0.29)  |        |         |        |
|               | 3.35   | 3.21   | -0.15   |        | 11.13   | 10.66  | -0.15   |        | 1.33   | 1.19   | -0.39   |        | 0.01   | 0.01   |         |        |
| Hungary       | (2.84, | (2.65, | (-0.18, | <0.001 | (10.19, | (9.62, | (-0.17, | <0.001 | (1.02, | (0.86, | (-0.62, | <0.001 | (0.00, | (0.00, | —       | —      |
|               | 3.95)  | 3.89)  | -0.11)  |        | 12.15)  | 11.80) | -0.13)  |        | 1.72)  | 1.63)  | -0.17)  |        | 0.13)  | 0.17)  |         |        |
|               | 3.63   | 3.35   | -0.24   |        | 12.05   | 11.11  | -0.25   |        | 1.68   | 1.51   | -0.38   |        | 0.01   | 0.01   | 0.00    |        |
| Iceland       | (0.95, | (0.99, | (-0.35, | <0.001 | (6.35,  | (6.19, | (-0.34, | <0.001 | (0.16, | (0.18, | (-0.74, | 0.040  | (0.00, | (0.00, | (0.00,  | 0.003  |
|               | 9.67)  | 8.79)  | -0.14)  |        | 20.90)  | 18.83) | -0.16)  |        | 6.74)  | 6.14)  | -0.02)  |        | 3.86)  | 3.78)  | 0.00)*  |        |
|               | 2.20   | 2.24   | 0.05    |        | 7.31    | 7.42   | 0.05    |        | 0.83   | 0.93   | 0.42    |        |        | 0.01   |         |        |
| India         | (2.15, | (2.20, | (-0.01, | 0.087  | (7.21,  | (7.35, | (0.02,  | <0.001 | (0.80, | (0.90, | (0.20,  | <0.001 | —      | (0.00, | —       | —      |
|               | 2.26)  | 2.28)  | 0.11)   |        | 7.41)   | 7.49)  | 0.07)   |        | 0.87)  | 0.95)  | 0.64)   |        |        | 0.01)  |         |        |
|               | 2.53   | 2.60   | 0.09    |        | 8.39    | 8.62   | 0.09    |        | 1.20   | 1.31   | 0.29    |        | 0.01   | 0.01   | 0.00    |        |
| Indonesia     | (2.41, | (2.50, | (0.05,  | <0.001 | (8.16,  | (8.45, | (0.06,  | <0.001 | (1.11, | (1.24, | (0.24,  | <0.001 | (0.00, | (0.01, | (0.00,  | 0.004  |

|                            |        |        |         |        |         |        |         |        |        |        |         |        |        |        |         |        |
|----------------------------|--------|--------|---------|--------|---------|--------|---------|--------|--------|--------|---------|--------|--------|--------|---------|--------|
|                            | 2.65)  | 2.69)  | 0.12)   |        | 8.62)   | 8.79)  | 0.11)   |        | 1.28)  | 1.38)  | 0.34)   | 0.02)  | 0.02)  | 0.00)* |         |        |
| Iran (Islamic Republic of) | 1.75   | 1.75   | -0.03   |        | 5.80    | 5.80   | -0.03   |        | 0.71   | 0.74   | 0.13    |        |        |        |         |        |
|                            | (1.55, | (1.63, | (-0.10, | 0.481  | (5.44,  | (5.59, | (-0.11, | 0.370  | (0.59, | (0.66, | (0.04,  | 0.003  | —      | —      | —       | —      |
|                            | 1.96)  | 1.88)  | 0.05)   |        | 6.19)   | 6.03)  | 0.04)   |        | 0.85)  | 0.83)  | 0.21)   |        |        |        |         |        |
|                            | 1.82   | 1.83   | 0.01    |        | 6.04    | 6.06   | 0.00    |        | 2.57   | 3.00   | 0.63    |        | 0.04   | 0.05   | 0.77    |        |
| Iraq                       | (1.47, | (1.62, | (-0.04, | 0.616  | (5.37,  | (5.67, | (-0.03, | 0.882  | (2.15, | (2.73, | (0.34,  | <0.001 | (0.00, | (0.02, | (0.77,  | <0.001 |
|                            | 2.23)  | 2.06)  | 0.07)   |        | 6.76)   | 6.47)  | 0.03)   |        | 3.05)  | 3.28)  | 0.93)   |        | 0.14)  | 0.09)  | 0.77)   |        |
|                            | 3.54   | 3.15   | -0.41   |        | 11.77   | 10.46  | -0.41   |        | 1.39   | 1.18   | -0.57   |        | 0.01   | 0.01   | 0.00    |        |
| Ireland                    | (2.61, | (2.42, | (-0.46, | <0.001 | (10.01, | (9.12, | (-0.45, | <0.001 | (0.83, | (0.76, | (-0.73, | <0.001 | (0.00, | (0.00, | (0.00,  | <0.001 |
|                            | 4.71)  | 4.05)  | -0.36)  |        | 13.76)  | 11.96) | -0.38)  |        | 2.19)  | 1.79)  | -0.42)  |        | 0.30)  | 0.27)  | 0.00)*  |        |
|                            | 3.21   | 2.95   | -0.29   |        | 10.67   | 9.81   | -0.28   |        | 1.58   | 1.31   | -0.62   |        | 0.01   | 0.01   | 0.00    |        |
| Israel                     | (2.46, | (2.40, | (-0.35, | <0.001 | (9.26,  | (8.78, | (-0.33, | <0.001 | (1.07, | (0.95, | (-0.78, | <0.001 | (0.00, | (0.00, | (0.00,  | <0.001 |
|                            | 4.13)  | 3.60)  | -0.24)  |        | 12.24)  | 10.92) | -0.25)  |        | 2.27)  | 1.76)  | -0.45)  |        | 0.23)  | 0.14)  | 0.00)*  |        |
|                            | 3.25   | 2.76   | -0.57   |        | 10.79   | 9.17   | -0.57   |        | 1.47   | 1.22   | -0.66   |        | 0.01   | 0.01   | 0.00    |        |
| Italy                      | (3.01, | (2.54, | (-0.61, | <0.001 | (10.35, | (8.75, | (-0.59, | <0.001 | (1.31, | (1.07, | (-0.74, | <0.001 | (0.00, | (0.00, | (0.00,  | <0.001 |
|                            | 3.51)  | 3.01)  | -0.52)  |        | 11.24)  | 9.60)  | -0.54)  |        | 1.64)  | 1.39)  | -0.59)  |        | 0.04)  | 0.04)  | 0.00)*  |        |
|                            | 0.94   | 0.99   | 0.18    |        | 3.11    | 3.29   | 0.19    |        | 1.00   | 1.62   | 1.84    |        | 0.01   | 0.02   | 2.25    |        |
| Jamaica                    | (0.37, | (0.49, | (0.09,  | <0.001 | (1.96,  | (2.30, | (0.16,  | <0.001 | (0.42, | (0.96, | (0.49,  | 0.008  | (0.00, | (0.00, | (-2.28, | 0.336  |
|                            | 1.94)  | 1.78)  | 0.26)   |        | 4.68)   | 4.55)  | 0.23)   |        | 2.02)  | 2.56)  | 3.21)   |        | 0.54)  | 0.39)  | 6.98)   |        |
|                            | 2.72   | 2.76   | 0.04    |        | 9.01    | 9.16   | 0.04    |        | 1.18   | 1.15   | -0.09   |        | 0.01   | 0.01   | 0.00    |        |
| Japan                      | (2.57, | (2.60, | (-0.01, | 0.123  | (8.75,  | (8.87, | (0.01,  | 0.013  | (1.09, | (1.05, | (-0.26, | 0.270  | (0.00, | (0.00, | (0.00,  | <0.001 |
|                            | 2.87)  | 2.93)  | 0.08)   |        | 9.28)   | 9.45)  | 0.08)   |        | 1.28)  | 1.26)  | 0.07)   |        | 0.02)  | 0.02)  | 0.00)*  |        |
|                            | 1.71   | 1.78   | 0.14    |        | 5.68    | 5.91   | 0.14    |        | 0.77   | 0.77   | 0.03    |        |        |        |         |        |
| Jordan                     | (0.99, | (1.42, | (0.05,  | 0.003  | (4.26,  | (5.23, | (0.11,  | <0.001 | (0.32, | (0.54, | (-0.10, | 0.620  | —      | —      | —       | —      |
|                            | 2.77)  | 2.21)  | 0.24)   |        | 7.42)   | 6.66)  | 0.16)   |        | 1.56)  | 1.07)  | 0.16)   |        |        |        |         |        |
|                            | 2.78   | 2.87   | 0.12    |        | 9.21    | 9.52   | 0.12    |        | 1.50   | 1.67   | 0.39    |        | 0.01   | 0.02   | 3.06    |        |
| Kazakhstan                 | (2.39, | (2.50, | (0.03,  | 0.007  | (8.48,  | (8.84, | (0.07,  | <0.001 | (1.22, | (1.39, | (0.04,  | 0.028  | (0.00, | (0.00, | (3.06,  | <0.001 |
|                            | 3.21)  | 3.28)  | 0.21)   |        | 9.97)   | 10.25) | 0.18)   |        | 1.83)  | 1.99)  | 0.74)   |        | 0.08)  | 0.09)  | 3.06)   |        |
|                            | 0.98   | 0.99   | 0.04    |        | 3.25    | 3.28   | 0.05    |        | 0.76   | 0.83   | 0.31    |        | 0.01   | 0.01   | 0.00    |        |
| Kenya                      | (0.74, | (0.85, | (-0.12, | 0.613  | (2.80,  | (3.01, | (-0.02, | 0.151  | (0.55, | (0.70, | (0.19,  | <0.001 | (0.00, | (0.00, | (0.00,  | <0.001 |
|                            | 1.27)  | 1.15)  | 0.20)   |        | 3.75)   | 3.56)  | 0.11)   |        | 1.01)  | 0.97)  | 0.44)   |        | 0.08)  | 0.04)  | 0.00)*  |        |
|                            | 2.36   | 2.40   | 0.07    |        | 7.82    | 7.97   | 0.07    |        | 10.12  | 11.53  | 0.42    |        | 0.18   | 0.20   | 0.42    |        |
| Kiribati                   | (0.01, | (0.07, | (0.00,  | 0.046  | (0.88,  | (1.93, | (0.03,  | <0.001 | (1.70, | (3.82, | (0.29,  | <0.001 | (0.00, | (0.00, | (-0.11, | 0.119  |

|              |        |        |         |        |        |         |         |        |        |        |         |        |        |        |         |        |
|--------------|--------|--------|---------|--------|--------|---------|---------|--------|--------|--------|---------|--------|--------|--------|---------|--------|
|              | 19.90) | 12.89) | 0.13)   |        | 29.18) | 21.64)  | 0.10)   |        | 32.61) | 26.69) | 0.55)   |        | 15.73) | 8.83)  | 0.96)   |        |
|              | 1.87   | 1.81   | -0.13   |        | 6.20   | 6.01    | -0.11   |        | 0.87   | 0.83   | -0.12   |        | 0.01   | 0.01   | 0.00    |        |
| Kuwait       | (1.09, | (1.36, | (-0.20, | <0.001 | (4.69, | (5.17,  | (-0.16, | <0.001 | (0.38, | (0.54, | (-0.62, | 0.643  | (0.00, | (0.00, | (0.00,  | <0.001 |
|              | 3.07)  | 2.44)  | -0.06)  |        | 8.12)  | 7.02)   | -0.07)  |        | 1.83)  | 1.33)  | 0.38)   |        | 0.62)  | 0.35)  | 0.00)*  |        |
|              | 2.62   | 2.73   | 0.14    |        | 8.70   | 9.06    | 0.14    |        | 0.93   | 1.02   | 0.32    |        |        |        |         |        |
| Kyrgyzstan   | (1.88, | (2.12, | (0.10,  | <0.001 | (7.27, | (7.89,  | (0.12,  | <0.001 | (0.51, | (0.66, | (0.21,  | <0.001 | —      | —      | —       | —      |
|              | 3.57)  | 3.47)  | 0.18)   |        | 10.33) | 10.35)  | 0.17)   |        | 1.56)  | 1.50)  | 0.42)   |        |        |        |         |        |
| Lao People's | 2.38   | 2.41   | 0.04    |        | 7.91   | 8.01    | 0.04    |        | 1.01   | 1.29   | 0.89    |        | 0.01   | 0.01   | 0.00    |        |
| Democratic   | (1.60, | (1.88, | (0.01,  | 0.014  | (6.39, | (6.99,  | (0.03,  | <0.001 | (0.52, | (0.90, | (0.75,  | <0.001 | (0.00, | (0.00, | (0.00,  | <0.001 |
| Republic     | 3.43)  | 3.06)  | 0.08)   |        | 9.67)  | 9.13)   | 0.06)   |        | 1.76)  | 1.78)  | 1.03)   |        | 0.33)  | 0.16)  | 0.00)*  |        |
|              | 3.22   | 3.54   | 0.36    |        | 10.68  | 11.74   | 0.36    |        | 1.06   | 1.19   | 0.39    |        |        |        |         |        |
| Latvia       | (2.22, | (2.29, | (0.27,  | <0.001 | (8.77, | (9.35,  | (0.25,  | <0.001 | (0.53, | (0.53, | (0.15,  | 0.001  | —      | —      | —       | —      |
|              | 4.55)  | 5.39)  | 0.46)   |        | 12.91) | 14.70)  | 0.46)   |        | 1.95)  | 2.52)  | 0.63)   |        |        |        |         |        |
|              | 1.69   | 1.77   | 0.15    |        | 5.62   | 5.86    | 0.13    |        | 0.86   | 0.85   | -0.04   |        | 0.01   | 0.01   | 0.00    |        |
| Lebanon      | (0.98, | (1.27, | (0.06,  | 0.001  | (4.24, | (4.90,  | (0.05,  | 0.002  | (0.38, | (0.51, | (-0.17, | 0.474  | (0.00, | (0.00, | (0.00,  | <0.001 |
|              | 2.73)  | 2.43)  | 0.24)   |        | 7.31)  | 6.96)   | 0.21)   |        | 1.66)  | 1.35)  | 0.08)   |        | 0.39)  | 0.25)  | 0.00)*  |        |
|              | 1.46   | 1.48   | 0.06    |        | 4.83   | 4.93    | 0.08    |        | 0.84   | 1.07   | 0.84    |        | 0.01   | 0.01   | 0.00    |        |
| Lesotho      | (0.61, | (0.79, | (0.01,  | 0.026  | (3.11, | (3.55,  | (0.05,  | <0.001 | (0.24, | (0.49, | (0.74,  | <0.001 | (0.00, | (0.00, | (0.00,  | 1.000  |
|              | 2.94)  | 2.55)  | 0.12)   |        | 7.16)  | 6.66)   | 0.11)   |        | 2.09)  | 2.02)  | 0.93)   |        | 0.75)  | 0.46)  | 0.00)   |        |
|              | 1.54   | 1.54   | -0.00   |        | 5.13   | 5.12    | -0.00   |        | 0.58   | 0.63   | 0.22    |        |        |        |         |        |
| Liberia      | (0.73, | (1.01, | (-0.05, | 0.984  | (3.51, | (4.09,  | (-0.02, | 0.706  | (0.15, | (0.31, | (0.11,  | <0.001 | —      | —      | —       | —      |
|              | 2.89)  | 2.26)  | 0.05)   |        | 7.25)  | 6.32)   | 0.02)   |        | 1.58)  | 1.13)  | 0.33)   |        |        |        |         |        |
|              | 1.82   | 1.80   | -0.03   |        | 6.05   | 5.99    | -0.03   |        | 0.75   | 0.76   | 0.01    |        |        |        |         |        |
| Libya        | (1.14, | (1.38, | (-0.09, | 0.288  | (4.73, | (5.20,  | (-0.07, | 0.167  | (0.35, | (0.50, | (-0.04, | 0.742  | —      | —      | —       | —      |
|              | 2.76)  | 2.32)  | 0.03)   |        | 7.62)  | 6.87)   | 0.01)   |        | 1.43)  | 1.13)  | 0.05)   |        |        |        |         |        |
|              | 3.38   | 3.72   | 0.33    |        | 11.21  | 12.33   | 0.32    |        | 1.14   | 1.25   | 0.34    |        |        |        |         |        |
| Lithuania    | (2.48, | (2.58, | (0.30,  | <0.001 | (9.51, | (10.17, | (0.28,  | <0.001 | (0.65, | (0.63, | (0.29,  | <0.001 | —      | —      | —       | —      |
|              | 4.50)  | 5.26)  | 0.36)   |        | 13.13) | 14.87)  | 0.36)   |        | 1.87)  | 2.29)  | 0.39)   |        |        |        |         |        |
|              | 3.71   | 3.44   | -0.26   |        | 12.32  | 11.40   | -0.26   |        | 1.71   | 1.43   | -0.67   |        | 0.01   | 0.01   | 0.00    |        |
| Luxembourg   | (1.40, | (1.58, | (-0.30, | <0.001 | (7.60, | (7.72,  | (-0.30, | <0.001 | (0.34, | (0.37, | (-1.05, | 0.001  | (0.00, | (0.00, | (0.00,  | <0.001 |
|              | 8.77)  | 7.04)  | -0.22)  |        | 19.51) | 16.65)  | -0.22)  |        | 6.08)  | 4.40)  | -0.29)  |        | 3.66)  | 2.42)  | 0.00)*  |        |
|              | 0.94   | 0.95   | 0.04    |        | 3.11   | 3.16    | 0.06    |        | 1.79   | 1.52   | -0.60   |        | 0.03   | 0.02   | -1.35   |        |
| Madagascar   | (0.64, | (0.76, | (0.04,  | <0.001 | (2.54, | (2.80,  | (0.02,  | 0.001  | (1.37, | (1.28, | (-0.88, | <0.001 | (0.00, | (0.00, | (-1.35, | <0.001 |

|                   |        |        |         |        |        |        |         |        |        |        |         |        |        |        |         |        |
|-------------------|--------|--------|---------|--------|--------|--------|---------|--------|--------|--------|---------|--------|--------|--------|---------|--------|
|                   | 1.33)  | 1.18)  | 0.04)   |        | 3.77)  | 3.56)  | 0.10)   |        | 2.29)  | 1.81)  | -0.32)  |        | 0.17)  | 0.08)  | -1.35)  |        |
|                   | 0.98)  | 0.99)  | 0.03)   |        | 3.24)  | 3.29)  | 0.06)   |        | 0.75)  | 0.80)  | 0.23)   |        | 0.01)  | 0.01)  | 0.00)   |        |
| Malawi            | (0.64, | (0.75, | (0.03,  | <0.001 | (2.58, | (2.84, | (0.03,  | <0.001 | (0.46, | (0.59, | (0.09,  | 0.002  | (0.00, | (0.00, | (0.00,  | <0.001 |
|                   | 1.44)  | 1.29)  | 0.03)   |        | 4.01)  | 3.80)  | 0.08)   |        | 1.16)  | 1.06)  | 0.38)   |        | 0.16)  | 0.08)  | 0.00)*  |        |
|                   | 2.47)  | 2.52)  | 0.06)   |        | 8.19)  | 8.37)  | 0.07)   |        | 1.41)  | 1.69)  | 0.61)   |        | 0.01)  | 0.02)  | 2.27)   |        |
| Malaysia          | (2.10, | (2.26, | (0.01,  | 0.010  | (7.51, | (7.89, | (0.04,  | <0.001 | (1.14, | (1.47, | (0.38,  | <0.001 | (0.00, | (0.00, | (2.27,  | <0.001 |
|                   | 2.88)  | 2.80)  | 0.11)   |        | 8.92)  | 8.87)  | 0.11)   |        | 1.73)  | 1.92)  | 0.83)   |        | 0.08)  | 0.06)  | 2.27)   |        |
|                   | 2.34)  | 2.49)  | 0.21)   |        | 7.76)  | 8.27)  | 0.22)   |        | 1.12)  | 1.09)  | -0.01)  |        | 0.01)  | 0.01)  | 0.00)   |        |
| Maldives          | (0.11, | (1.07, | (0.16,  | <0.001 | (2.08, | (5.40, | (0.18,  | <0.001 | (0.00, | (0.26, | (-0.19, | 0.882  | (0.00, | (0.00, | (0.00,  | <0.001 |
|                   | 11.73) | 5.82)  | 0.25)   |        | 20.16) | 12.80) | 0.25)   |        | 9.65)  | 4.05)  | 0.16)   |        | 7.54)  | 2.69)  | 0.00)*  |        |
|                   | 1.42)  | 1.46)  | 0.09)   |        | 4.70)  | 4.83)  | 0.08)   |        | 0.60)  | 0.67)  | 0.39)   |        |        |        |         |        |
| Mali              | (0.98, | (1.16, | (0.01,  | 0.023  | (3.86, | (4.28, | (0.04,  | 0.001  | (0.33, | (0.47, | (0.32,  | <0.001 | —      | —      | —       | —      |
|                   | 1.98)  | 1.80)  | 0.16)   |        | 5.67)  | 5.44)  | 0.13)   |        | 1.00)  | 0.92)  | 0.46)   |        |        |        |         |        |
|                   | 3.44)  | 3.14)  | -0.32)  |        | 11.42) | 10.41) | -0.32)  |        | 1.37)  | 1.38)  | 0.01)   |        | 0.01)  | 0.01)  | 0.00)   |        |
| Malta             | (1.19, | (1.08, | (-0.39, | <0.001 | (6.80, | (6.18, | (-0.39, | <0.001 | (0.19, | (0.22, | (-0.19, | 0.908  | (0.00, | (0.00, | (-0.00, | 1.000  |
|                   | 8.22)  | 8.19)  | -0.24)  |        | 18.36) | 17.26) | -0.25)  |        | 5.30)  | 5.83)  | 0.21)   |        | 3.19)  | 3.95)  | 0.00)   |        |
|                   | 2.30)  | 2.37)  | 0.09)   |        | 7.65)  | 7.86)  | 0.09)   |        | 7.17)  | 10.48) | 1.33)   |        | 0.12)  | 0.18)  | 1.27)   |        |
| Marshall Islands  | (0.00, | (0.01, | (0.05,  | <0.001 | (0.22, | (0.86, | (0.07,  | <0.001 | (0.18, | (1.74, | (1.16,  | <0.001 | (0.00, | (0.00, | (1.13,  | <0.001 |
|                   | 31.87) | 20.65) | 0.14)   |        | 41.57) | 29.86) | 0.11)   |        | 40.59) | 33.97) | 1.50)   |        | 27.55) | 16.50) | 1.41)   |        |
|                   | 1.48)  | 1.51)  | 0.08)   |        | 4.90)  | 5.01)  | 0.08)   |        | 0.58)  | 0.63)  | 0.34)   |        |        |        |         |        |
| Mauritania        | (0.68, | (0.91, | (0.04,  | <0.001 | (3.30, | (3.84, | (0.06,  | <0.001 | (0.14, | (0.27, | (0.30,  | <0.001 | —      | —      | —       | —      |
|                   | 2.81)  | 2.37)  | 0.11)   |        | 7.02)  | 6.43)  | 0.10)   |        | 1.58)  | 1.25)  | 0.38)   |        |        |        |         |        |
|                   | 2.43)  | 2.49)  | 0.08)   |        | 8.07)  | 8.25)  | 0.07)   |        | 1.14)  | 1.24)  | 0.29)   |        | 0.01)  | 0.01)  | 0.00)   |        |
| Mauritius         | (1.24, | (1.31, | (0.04,  | <0.001 | (5.72, | (5.97, | (0.06,  | <0.001 | (0.39, | (0.47, | (0.16,  | <0.001 | (0.00, | (0.00, | (0.00,  | <0.001 |
|                   | 4.30)  | 4.34)  | 0.12)   |        | 11.07) | 11.17) | 0.09)   |        | 2.59)  | 2.72)  | 0.43)   |        | 0.82)  | 0.89)  | 0.00)*  |        |
|                   | 1.07)  | 1.08)  | 0.03)   |        | 3.56)  | 3.57)  | 0.01)   |        | 0.95)  | 0.90)  | -0.10)  |        | 0.01)  | 0.01)  | 0.00)   |        |
| Mexico            | (0.95, | (0.99, | (-0.02, | 0.234  | (3.34, | (3.41, | (-0.03, | 0.587  | (0.84, | (0.82, | (-0.24, | 0.148  | (0.00, | (0.00, | (-0.00, | 1.000  |
|                   | 1.20)  | 1.17)  | 0.07)   |        | 3.79)  | 3.74)  | 0.05)   |        | 1.07)  | 0.99)  | 0.04)   |        | 0.03)  | 0.02)  | 0.00)   |        |
| Micronesia        | 2.32)  | 2.35)  | 0.04)   |        | 7.71)  | 7.79)  | 0.03)   |        | 7.62)  | 9.71)  | 0.84)   |        | 0.13)  | 0.17)  | 0.95)   |        |
| (Federated States | (0.02, | (0.03, | (-0.03, | 0.282  | (1.28, | (1.44, | (-0.00, | 0.071  | (1.28, | (2.31, | (0.73,  | <0.001 | (0.00, | (0.00, | (0.43,  | <0.001 |
| of)               | 15.98) | 15.06) | 0.11)   |        | 24.84) | 23.91) | 0.07)   |        | 24.57) | 26.70) | 0.95)   |        | 11.85) | 10.96) | 1.48)   |        |
|                   | 3.52)  | 2.96)  | -0.61)  |        | 11.72) | 9.72)  | -0.65)  |        | 1.58)  | 1.38)  | -0.50)  |        | 0.01)  | 0.01)  | 0.00)   |        |
| Monaco            | (0.00, | (0.00, | (-0.68, | <0.001 | (0.61, | (0.31, | (-0.78, | <0.001 | (0.00, | (0.00, | (-0.58, | <0.001 | (0.00, | (0.00, | (-0.00, | 1.000  |

|             |         |        |         |        |         |         |         |        |         |         |         |        |         |        |         |        |
|-------------|---------|--------|---------|--------|---------|---------|---------|--------|---------|---------|---------|--------|---------|--------|---------|--------|
|             | 66.28)  | 49.35) | -0.53)  |        | 77.56)  | 60.13)  | -0.52)  |        | 63.58)  | 46.68)  | -0.42)  |        | 61.41)  | 44.33) | 0.00)   |        |
|             | 2.66    | 2.80   | 0.18    |        | 8.83    | 9.30    | 0.19    |        | 0.98    | 1.04    | 0.23    |        |         |        |         |        |
| Mongolia    | (1.53,  | (2.03, | (0.14,  | <0.001 | (6.61,  | (7.83,  | (0.14,  | <0.001 | (0.36,  | (0.60,  | (0.08,  | 0.003  | —       | —      | —       | —      |
|             | 4.31)   | 3.82)  | 0.22)   |        | 11.57)  | 11.01)  | 0.23)   |        | 2.15)   | 1.75)   | 0.38)   |        |         |        |         |        |
|             | 3.20    | 3.01   | -0.21   |        | 10.60   | 9.98    | -0.21   |        | 2.36    | 1.99    | -0.74   |        | 0.03    | 0.02   | -1.39   |        |
| Montenegro  | (1.40,  | (1.24, | (-0.28, | <0.001 | (7.00,  | (6.44,  | (-0.23, | <0.001 | (0.87,  | (0.63,  | (-1.30, | 0.011  | (0.00,  | (0.00, | (-3.82, | 0.273  |
|             | 6.29)   | 6.35)  | -0.15)  |        | 15.44)  | 14.96)  | -0.19)  |        | 5.16)   | 4.97)   | -0.17)  |        | 1.59)   | 2.03)  | 1.11)   |        |
|             | 1.77    | 1.77   | -0.01   |        | 5.88    | 5.87    | -0.01   |        | 0.72    | 0.69    | -0.14   |        |         |        |         |        |
| Morocco     | (1.50,  | (1.56, | (-0.08, | 0.875  | (5.36,  | (5.48,  | (-0.03, | 0.504  | (0.55,  | (0.57,  | (-0.31, | 0.123  | —       | —      | —       | —      |
|             | 2.08)   | 2.00)  | 0.07)   |        | 6.42)   | 6.27)   | 0.01)   |        | 0.92)   | 0.84)   | 0.04)   |        |         |        |         |        |
|             | 0.95    | 0.98   | 0.11    |        | 3.16    | 3.26    | 0.11    |        | 0.66    | 0.83    | 0.83    |        | 0.01    | 0.01   | 0.00    |        |
| Mozambique  | (0.67,  | (0.78, | (0.04,  | 0.002  | (2.62,  | (2.88,  | (0.09,  | <0.001 | (0.43,  | (0.64,  | (0.73,  | <0.001 | (0.00,  | (0.00, | (0.00,  | 0.009  |
|             | 1.32)   | 1.22)  | 0.19)   |        | 3.78)   | 3.68)   | 0.14)   |        | 0.97)   | 1.05)   | 0.92)   |        | 0.11)   | 0.07)  | 0.00)*  |        |
|             | 2.39    | 2.41   | 0.03    |        | 7.93    | 7.99    | 0.02    |        | 1.24    | 1.33    | 0.20    |        | 0.01    | 0.01   | 0.00    |        |
| Myanmar     | (2.14,  | (2.21, | (-0.02, | 0.239  | (7.47,  | (7.62,  | (0.01,  | 0.011  | (1.07,  | (1.18,  | (0.05,  | 0.008  | (0.00,  | (0.00, | (0.00,  | <0.001 |
|             | 2.66)   | 2.62)  | 0.07)   |        | 8.41)   | 8.37)   | 0.04)   |        | 1.44)   | 1.49)   | 0.35)   |        | 0.05)   | 0.04)  | 0.00)*  |        |
|             | 1.43    | 1.47   | 0.11    |        | 4.73    | 4.87    | 0.11    |        | 0.96    | 1.02    | 0.28    |        | 0.01    | 0.01   | 0.00    |        |
| Namibia     | (0.51,  | (0.78, | (0.03,  | 0.010  | (2.83,  | (3.51,  | (0.08,  | <0.001 | (0.25,  | (0.47,  | (0.04,  | 0.020  | (0.00,  | (0.00, | (-0.00, | 1.000  |
|             | 3.18)   | 2.52)  | 0.19)   |        | 7.44)   | 6.57)   | 0.14)   |        | 2.52)   | 1.95)   | 0.52)   |        | 0.98)   | 0.45)  | 0.00)   |        |
|             | 2.37    | 2.45   | 0.11    |        | 7.88    | 8.12    | 0.09    |        | 9.59    | 11.56   | 0.65    |        | 0.17    | 0.20   | 0.64    |        |
| Nauru       | (0.00,  | (0.00, | (0.05,  | <0.001 | (0.00,  | (0.00,  | (0.06,  | <0.001 | (0.00,  | (0.01,  | (0.61,  | <0.001 | (0.00,  | (0.00, | (0.23,  | 0.002  |
|             | 108.53) | 98.14) | 0.16)   |        | 119.49) | 109.37) | 0.13)   |        | 122.57) | 115.66) | 0.69)   |        | 104.03) | 93.56) | 1.05)   |        |
|             | 2.05    | 2.00   | -0.08   |        | 6.80    | 6.62    | -0.09   |        | 0.72    | 0.75    | 0.17    |        |         |        |         |        |
| Nepal       | (1.70,  | (1.74, | (-0.12, | <0.001 | (6.15,  | (6.15,  | (-0.11, | <0.001 | (0.52,  | (0.60,  | (-0.03, | 0.088  | —       | —      | —       | —      |
|             | 2.45)   | 2.28)  | -0.05)  |        | 7.50)   | 7.13)   | -0.07)  |        | 0.97)   | 0.94)   | 0.36)   |        |         |        |         |        |
|             | 3.20    | 2.92   | -0.32   |        | 10.63   | 9.67    | -0.33   |        | 1.35    | 1.15    | -0.58   |        | 0.01    | 0.01   | 0.00    |        |
| Netherlands | (2.78,  | (2.49, | (-0.37, | <0.001 | (9.84,  | (8.88,  | (-0.35, | <0.001 | (1.08,  | (0.89,  | (-0.69, | <0.001 | (0.00,  | (0.00, | (0.00,  | <0.001 |
|             | 3.68)   | 3.40)  | -0.26)  |        | 11.46)  | 10.52)  | -0.31)  |        | 1.67)   | 1.47)   | -0.46)  |        | 0.09)   | 0.09)  | 0.00)*  |        |
|             | 4.52    | 4.67   | 0.12    |        | 15.02   | 15.50   | 0.13    |        | 1.66    | 1.71    | 0.07    |        | 0.01    | 0.01   | 0.00    |        |
| New Zealand | (3.48,  | (3.64, | (0.06,  | <0.001 | (13.05, | (13.57, | (0.05,  | 0.001  | (1.06,  | (1.11,  | (-0.23, | 0.642  | (0.00,  | (0.00, | (0.00,  | 1.000  |
|             | 5.79)   | 5.92)  | 0.19)   |        | 17.20)  | 17.65)  | 0.20)   |        | 2.50)   | 2.53)   | 0.38)   |        | 0.29)   | 0.29)  | 0.00)   |        |
|             | 0.96    | 0.98   | 0.10    |        | 3.18    | 3.27    | 0.10    |        | 0.68    | 0.64    | -0.25   |        | 0.01    | 0.01   | 0.00    |        |
| Nicaragua   | (0.47,  | (0.64, | (0.04,  | <0.001 | (2.20,  | (2.61,  | (0.08,  | <0.001 | (0.28,  | (0.37,  | (-0.50, | 0.040  | (0.00,  | (0.00, | (-0.00, | 1.000  |

|                          |         |         |         |        |         |         |         |        |         |         |         |        |         |         |         |        |
|--------------------------|---------|---------|---------|--------|---------|---------|---------|--------|---------|---------|---------|--------|---------|---------|---------|--------|
|                          | 1.75)   | 1.45)   | 0.15)   |        | 4.46)   | 4.05)   | 0.13)   |        | 1.39)   | 1.03)   | -0.01)  |        | 0.37)   | 0.16)   | 0.00)   |        |
|                          | 1.44    | 1.47    | 0.07    |        | 4.79    | 4.87    | 0.06    |        | 0.56    | 0.62    | 0.37    |        |         |         |         |        |
| Niger                    | (0.97,  | (1.17,  | (0.04,  | <0.001 | (3.88,  | (4.30,  | (0.03,  | <0.001 | (0.28,  | (0.43,  | (0.16,  | 0.001  | —       | —       | —       | —      |
|                          | 2.07)   | 1.83)   | 0.11)   |        | 5.86)   | 5.49)   | 0.08)   |        | 1.00)   | 0.86)   | 0.57)   |        |         |         |         |        |
|                          | 1.56    | 1.59    | 0.06    |        | 5.20    | 5.28    | 0.06    |        | 0.64    | 0.65    | 0.01    |        |         |         |         |        |
| Nigeria                  | (1.42,  | (1.49,  | (0.00,  | 0.038  | (4.92,  | (5.10,  | (0.03,  | 0.001  | (0.55,  | (0.59,  | (-0.09, | 0.859  | —       | —       | —       | —      |
|                          | 1.72)   | 1.69)   | 0.13)   |        | 5.48)   | 5.46)   | 0.09)   |        | 0.75)   | 0.71)   | 0.11)   |        |         |         |         |        |
|                          | 2.41    | 2.47    | 0.08    |        | 7.99    | 8.21    | 0.09    |        | 7.59    | 7.45    | -0.06   |        | 0.13    | 0.13    | 0.05    |        |
| Niue                     | (0.00,  | (0.00,  | (0.03,  | 0.001  | (0.00,  | (0.00,  | (0.06,  | <0.001 | (0.00,  | (0.00,  | (-0.19, | 0.384  | (0.00,  | (0.00,  | (0.05,  | <0.001 |
|                          | 522.79) | 736.95) | 0.13)   |        | 534.35) | 747.90) | 0.12)   |        | 533.54) | 746.72) | 0.07)   |        | 518.02) | 732.36) | 0.05)   |        |
|                          | 2.89    | 2.87    | -0.03   |        | 9.60    | 9.51    | -0.03   |        | 1.28    | 1.17    | -0.28   |        | 0.01    | 0.01    | 0.00    |        |
| North Macedonia          | (1.85,  | (1.89,  | (-0.08, | 0.176  | (7.61,  | (7.65,  | (-0.06, | 0.004  | (0.63,  | (0.59,  | (-0.56, | 0.051  | (0.00,  | (0.00,  | (0.00,  | <0.001 |
|                          | 4.31)   | 4.29)   | 0.01)   |        | 11.95)  | 11.79)  | -0.01)  |        | 2.32)   | 2.23)   | 0.00)   |        | 0.49)   | 0.67)   | 0.00)*  |        |
|                          | 2.39    | 2.49    | 0.18    |        | 7.95    | 8.26    | 0.18    |        | 7.91    | 7.58    | -0.38   |        | 0.14    | 0.13    | -0.70   |        |
| Northern Mariana Islands | (0.01,  | (0.00,  | (0.02,  | 0.030  | (0.93,  | (0.07,  | (-0.03, | 0.097  | (0.94,  | (0.04,  | (-1.51, | 0.519  | (0.00,  | (0.00,  | (-2.96, | 0.547  |
|                          | 23.89)  | 48.36)  | 0.35)   |        | 32.55)  | 58.80)  | 0.40)   |        | 32.39)  | 57.78)  | 0.77)   |        | 20.16)  | 43.76)  | 1.60)   |        |
|                          | 3.39    | 3.08    | -0.34   |        | 11.26   | 10.24   | -0.33   |        | 1.44    | 1.19    | -0.66   |        | 0.01    | 0.01    | 0.00    |        |
| Norway                   | (2.57,  | (2.35,  | (-0.37, | <0.001 | (9.72,  | (8.88,  | (-0.35, | <0.001 | (0.93,  | (0.76,  | (-0.78, | <0.001 | (0.00,  | (0.00,  | (0.00,  | <0.001 |
|                          | 4.40)   | 3.99)   | -0.30)  |        | 12.98)  | 11.78)  | -0.30)  |        | 2.15)   | 1.81)   | -0.54)  |        | 0.27)   | 0.26)   | 0.00)*  |        |
|                          | 1.84    | 2.01    | 0.31    |        | 6.10    | 6.68    | 0.31    |        | 0.83    | 0.87    | 0.13    |        | 0.01    | 0.01    | 0.00    |        |
| Oman                     | (1.02,  | (1.55,  | (0.16,  | <0.001 | (4.50,  | (5.79,  | (0.14,  | <0.001 | (0.32,  | (0.58,  | (0.03,  | 0.014  | (0.00,  | (0.00,  | (0.00,  | <0.001 |
|                          | 3.07)   | 2.66)   | 0.46)   |        | 8.11)   | 7.73)   | 0.48)   |        | 1.76)   | 1.36)   | 0.22)   |        | 0.51)   | 0.32)   | 0.00)*  |        |
|                          | 2.21    | 2.22    | 0.01    |        | 7.32    | 7.35    | 0.01    |        | 0.85    | 0.99    | 0.54    |        |         | 0.01    |         |        |
| Pakistan                 | (2.04,  | (2.11,  | (-0.03, | 0.646  | (7.02,  | (7.16,  | (-0.01, | 0.427  | (0.75,  | (0.92,  | (0.43,  | <0.001 | —       | (0.00,  | —       | —      |
|                          | 2.38)   | 2.33)   | 0.05)   |        | 7.63)   | 7.55)   | 0.03)   |        | 0.96)   | 1.06)   | 0.66)   |        |         | 0.02)   |         |        |
|                          | 2.41    | 2.52    | 0.15    |        | 8.01    | 8.36    | 0.15    |        | 5.75    | 5.32    | -0.29   |        | 0.10    | 0.09    | -0.40   |        |
| Palau                    | (0.00,  | (0.00,  | (0.12,  | <0.001 | (0.01,  | (0.03,  | (0.13,  | <0.001 | (0.00,  | (0.00,  | (-0.40, | <0.001 | (0.00,  | (0.00,  | (-1.09, | 0.256  |
|                          | 63.78)  | 73.00)  | 0.18)   |        | 74.56)  | 82.17)  | 0.17)   |        | 70.20)  | 77.65)  | -0.19)  |        | 59.09)  | 68.99)  | 0.29)   |        |
|                          | 1.65    | 1.69    | 0.08    |        | 5.46    | 5.60    | 0.09    |        | 1.01    | 1.26    | 0.71    |        | 0.01    | 0.01    | -0.67   |        |
| Palestine                | (0.72,  | (1.11,  | (0.03,  | 0.001  | (3.59,  | (4.50,  | (0.07,  | <0.001 | (0.34,  | (0.78,  | (0.34,  | <0.001 | (0.00,  | (0.00,  | (-0.67, | <0.001 |
|                          | 3.23)   | 2.46)   | 0.13)   |        | 7.97)   | 6.89)   | 0.11)   |        | 2.37)   | 1.94)   | 1.08)   |        | 0.80)   | 0.26)   | -0.67)  |        |
|                          | 0.96    | 0.99    | 0.11    |        | 3.19    | 3.29    | 0.11    |        | 0.70    | 0.77    | 0.37    |        | 0.01    | 0.01    | 0.00    |        |
| Panama                   | (0.41,  | (0.56,  | (-0.00, | 0.055  | (2.08,  | (2.45,  | (0.07,  | <0.001 | (0.25,  | (0.40,  | (-0.12, | 0.136  | (0.00,  | (0.00,  | (0.00,  | <0.001 |



|                     |        |        |         |         |         |         |         |         |        |        |         |         |        |        |         |         |
|---------------------|--------|--------|---------|---------|---------|---------|---------|---------|--------|--------|---------|---------|--------|--------|---------|---------|
|                     | 1.90)  | 1.63)  | 0.21)   |         | 4.67)   | 4.32)   | 0.15)   |         | 1.54)  | 1.35)  | 0.86)   |         | 0.47)  | 0.26)  | 0.00)*  |         |
|                     | 2.31)  | 2.34)  | 0.04)   |         | 7.65)   | 7.78)   | 0.05)   |         | 3.82)  | 4.94)  | 0.86)   |         | 0.06)  | 0.08)  | 0.98)   |         |
| Papua New Guinea    | (1.55, | (1.87, | (-0.03, | 0.246)  | (6.21,  | (6.89,  | (-0.01, | 0.087)  | (2.83, | (4.24, | (0.69,  | <0.001) | (0.00, | (0.02, | (0.98,  | <0.001) |
|                     | 3.30)  | 2.90)  | 0.11)   |         | 9.34)   | 8.75)   | 0.11)   |         | 5.05)  | 5.72)  | 1.02)   |         | 0.41)  | 0.24)  | 0.98)   |         |
|                     | 1.38)  | 1.37)  | -0.03)  |         | 4.58)   | 4.56)   | -0.01)  |         | 1.25)  | 1.24)  | 0.02)   |         | 0.02)  | 0.02)  | 0.17)   |         |
| Paraguay            | (0.82, | (0.98, | (-0.11, | 0.576)  | (3.49,  | (3.80,  | (-0.04, | 0.386)  | (0.72, | (0.86, | (-0.14, | 0.814)  | (0.00, | (0.00, | (-1.86, | 0.874)  |
|                     | 2.18)  | 1.88)  | 0.06)   |         | 5.90)   | 5.43)   | 0.02)   |         | 2.01)  | 1.72)  | 0.18)   |         | 0.32)  | 0.16)  | 2.24)   |         |
|                     | 0.36)  | 0.38)  | 0.21)   |         | 1.19)   | 1.27)   | 0.21)   |         | 0.91)  | 0.72)  | -0.71)  |         | 0.02)  | 0.01)  | -2.21)  |         |
| Peru                | (0.23, | (0.29, | (0.02,  | 0.027)  | (0.95,  | (1.09,  | (0.11,  | <0.001) | (0.70, | (0.59, | (-1.28, | 0.016)  | (0.00, | (0.00, | (-2.21, | <0.001) |
|                     | 0.53)  | 0.50)  | 0.39)   |         | 1.48)   | 1.47)   | 0.32)   |         | 1.16)  | 0.88)  | -0.13)  |         | 0.08)  | 0.05)  | -2.21)  |         |
|                     | 2.42)  | 2.45)  | 0.04)   |         | 8.04)   | 8.14)   | 0.04)   |         | 1.07)  | 2.06)  | 2.30)   |         | 0.01)  | 0.03)  | 3.72)   |         |
| Philippines         | (2.22, | (2.30, | (-0.00, | 0.060)  | (7.66,  | (7.86,  | (0.01,  | 0.006)  | (0.93, | (1.93, | (2.02,  | <0.001) | (0.00, | (0.01, | (3.72,  | <0.001) |
|                     | 2.64)  | 2.61)  | 0.08)   |         | 8.44)   | 8.41)   | 0.07)   |         | 1.22)  | 2.20)  | 2.58)   |         | 0.03)  | 0.05)  | 3.72)   |         |
|                     | 3.18)  | 3.17)  | 0.01)   |         | 10.56)  | 10.53)  | 0.01)   |         | 1.24)  | 1.22)  | -0.08)  |         | 0.01)  | 0.01)  | 0.00)   |         |
| Poland              | (2.93, | (2.91, | (-0.12, | 0.935)  | (10.09, | (10.06, | (-0.10, | 0.917)  | (1.08, | (1.07, | (-0.25, | 0.391)  | (0.00, | (0.00, | (0.00,  | <0.001) |
|                     | 3.46)  | 3.46)  | 0.13)   |         | 11.04)  | 11.03)  | 0.11)   |         | 1.42)  | 1.41)  | 0.10)   |         | 0.04)  | 0.05)  | 0.00)*  |         |
|                     | 3.62)  | 3.06)  | -0.57)  |         | 12.00)  | 10.14)  | -0.57)  |         | 1.67)  | 1.25)  | -1.05)  |         | 0.01)  | 0.01)  | 0.00)   |         |
| Portugal            | (3.03, | (2.53, | (-0.65, | <0.001) | (10.91, | (9.17,  | (-0.64, | <0.001) | (1.28, | (0.92, | (-1.32, | <0.001) | (0.00, | (0.00, | (0.00,  | <0.001) |
|                     | 4.28)  | 3.69)  | -0.49)  |         | 13.16)  | 11.21)  | -0.49)  |         | 2.14)  | 1.68)  | -0.77)  |         | 0.12)  | 0.15)  | 0.00)*  |         |
|                     | 0.97)  | 1.01)  | 0.16)   |         | 3.20)   | 3.35)   | 0.15)   |         | 1.04)  | 1.01)  | -0.07)  |         | 0.01)  | 0.01)  | 0.62)   |         |
| Puerto Rico         | (0.52, | (0.52, | (0.11,  | <0.001) | (2.32,  | (2.40,  | (0.12,  | <0.001) | (0.57, | (0.53, | (-0.68, | 0.816)  | (0.00, | (0.00, | (0.62,  | <0.001) |
|                     | 1.65)  | 1.78)  | 0.20)   |         | 4.31)   | 4.56)   | 0.18)   |         | 1.75)  | 1.79)  | 0.54)   |         | 0.30)  | 0.37)  | 0.62)   |         |
|                     | 2.01)  | 2.05)  | 0.06)   |         | 6.66)   | 6.78)   | 0.05)   |         | 1.21)  | 1.13)  | -0.28)  |         | 0.01)  | 0.01)  | 0.00)   |         |
| Qatar               | (0.74, | (1.49, | (0.00,  | 0.043)  | (4.07,  | (5.71,  | (-0.00, | 0.071)  | (0.31, | (0.73, | (-0.44, | 0.001)  | (0.00, | (0.00, | (0.00,  | <0.001) |
|                     | 5.38)  | 3.03)  | 0.11)   |         | 11.08)  | 8.22)   | 0.10)   |         | 4.37)  | 1.99)  | -0.11)  |         | 2.88)  | 0.76)  | 0.00)*  |         |
|                     | 3.26)  | 3.02)  | -0.27)  |         | 10.84)  | 10.02)  | -0.27)  |         | 1.35)  | 1.14)  | -0.58)  |         | 0.01)  |        |         |         |
| Republic of Korea   | (3.01, | (2.80, | (-0.34, | <0.001) | (10.37, | (9.61,  | (-0.32, | <0.001) | (1.19, | (1.00, | (-0.69, | <0.001) | (0.00, | —      | —       | —       |
|                     | 3.53)  | 3.27)  | -0.20)  |         | 11.32)  | 10.44)  | -0.22)  |         | 1.53)  | 1.29)  | -0.48)  |         | 0.03)  |        |         |         |
|                     | 3.31)  | 3.56)  | 0.25)   |         | 10.97)  | 11.81)  | 0.26)   |         | 1.13)  | 1.23)  | 0.24)   |         |        |        |         |         |
| Republic of Moldova | (2.55, | (2.72, | (0.20,  | <0.001) | (9.56,  | (10.25, | (0.21,  | <0.001) | (0.71, | (0.76, | (0.09,  | 0.002)  | —      | —      | —       | —       |
|                     | 4.23)  | 4.65)  | 0.29)   |         | 12.55)  | 13.62)  | 0.31)   |         | 1.73)  | 1.97)  | 0.40)   |         |        |        |         |         |
|                     | 3.04)  | 2.99)  | -0.06)  |         | 10.07)  | 9.91)   | -0.07)  |         | 1.07)  | 1.09)  | 0.01)   |         |        |        |         |         |
| Romania             | (2.69, | (2.60, | (-0.15, | 0.189)  | (9.44,  | (9.19,  | (-0.15, | 0.108)  | (0.87, | (0.86, | (-0.13, | 0.889)  | —      | —      | —       | —       |

|                                  |        |        |         |        |         |         |         |        |        |        |         |        |        |        |         |        |
|----------------------------------|--------|--------|---------|--------|---------|---------|---------|--------|--------|--------|---------|--------|--------|--------|---------|--------|
|                                  | 3.41)  | 3.43)  | 0.03)   |        | 10.73)  | 10.68)  | 0.02)   |        | 1.31)  | 1.37)  | 0.15)   |        |        |        |         |        |
|                                  | 3.26   | 3.46   | 0.21    |        | 10.80   | 11.48   | 0.21    |        | 1.14   | 1.24   | 0.30    |        |        |        |         |        |
| Russian Federation               | (3.12, | (3.32, | (0.16,  | <0.001 | (10.55, | (11.23, | (0.18,  | <0.001 | (1.06, | (1.16, | (0.18,  | <0.001 | —      | —      | —       | —      |
|                                  | 3.39)  | 3.61)  | 0.25)   |        | 11.05)  | 11.75)  | 0.24)   |        | 1.22)  | 1.33)  | 0.41)   |        |        |        |         |        |
|                                  | 0.97   | 0.98   | 0.05    |        | 3.20    | 3.25    | 0.04    |        | 1.05   | 0.96   | -0.31   |        | 0.01   | 0.01   | 0.00    |        |
| Rwanda                           | (0.60, | (0.72, | (-0.07, | 0.412  | (2.49,  | (2.75,  | (-0.07, | 0.499  | (0.67, | (0.70, | (-0.42, | <0.001 | (0.00, | (0.00, | (0.00,  | <0.001 |
|                                  | 1.48)  | 1.31)  | 0.17)   |        | 4.06)   | 3.82)   | 0.15)   |        | 1.58)  | 1.29)  | -0.20)  |        | 0.20)  | 0.10)  | 0.00)*  |        |
| Saint Kitts and Nevis            | 0.96   | 1.01   | 0.15    |        | 3.20    | 3.34    | 0.15    |        | 2.33   | 1.10   | -2.01   |        | 0.04   | 0.01   | -2.75   |        |
|                                  | (0.00, | (0.00, | (0.04,  | 0.011  | (0.00,  | (0.05,  | (0.11,  | <0.001 | (0.00, | (0.00, | (-3.63, | 0.017  | (0.00, | (0.00, | (-3.67, | <0.001 |
|                                  | 27.64) | 19.99) | 0.27)   |        | 31.96)  | 23.90)  | 0.18)   |        | 30.19) | 20.17) | -0.36)  |        | 25.78) | 18.24) | -1.81)  |        |
| Saint Lucia                      | 0.98   | 1.00   | 0.06    |        | 3.25    | 3.32    | 0.07    |        | 1.43   | 1.26   | -0.40   |        | 0.02   | 0.02   | 0.00    |        |
|                                  | (0.00, | (0.01, | (-0.02, | 0.129  | (0.17,  | (0.53,  | (0.03,  | 0.002  | (0.00, | (0.02, | (-0.75, | 0.024  | (0.00, | (0.00, | (0.00,  | <0.001 |
|                                  | 11.27) | 7.78)  | 0.13)   |        | 15.29)  | 11.42)  | 0.12)   |        | 12.05) | 8.24)  | -0.05)  |        | 9.41)  | 6.04)  | 0.00)*  |        |
| Saint Vincent and the Grenadines | 0.96   | 0.99   | 0.12    |        | 3.18    | 3.28    | 0.11    |        | 1.64   | 1.38   | -0.52   |        | 0.02   | 0.02   | 0.00    |        |
|                                  | (0.00, | (0.00, | (0.09,  | <0.001 | (0.09,  | (0.21,  | (0.05,  | <0.001 | (0.00, | (0.00, | (-1.45, | 0.278  | (0.00, | (0.00, | (0.00,  | <0.001 |
|                                  | 13.67) | 11.08) | 0.16)   |        | 17.70)  | 15.00)  | 0.17)   |        | 14.82) | 11.82) | 0.42)   |        | 11.86) | 9.23)  | 0.00)*  |        |
| Samoa                            | 2.43   | 2.49   | 0.07    |        | 8.07    | 8.27    | 0.07    |        | 6.62   | 7.76   | 0.55    |        | 0.11   | 0.13   | 0.55    |        |
|                                  | (0.08, | (0.22, | (0.01,  | 0.021  | (1.99,  | (2.85,  | (0.02,  | 0.004  | (1.37, | (2.59, | (0.47,  | <0.001 | (0.00, | (0.00, | (0.34,  | <0.001 |
|                                  | 12.93) | 10.12) | 0.13)   |        | 21.79)  | 18.71)  | 0.12)   |        | 19.52) | 17.92) | 0.63)   |        | 8.69)  | 5.94)  | 0.76)   |        |
|                                  | 3.66   | 2.95   | -0.74   |        | 12.19   | 9.76    | -0.77   |        | 1.37   | 1.18   | -0.52   |        | 0.01   | 0.01   | 0.00    |        |
| San Marino                       | (0.00, | (0.00, | (-0.79, | <0.001 | (0.34,  | (0.34,  | (-0.81, | <0.001 | (0.00, | (0.00, | (-0.63, | <0.001 | (0.00, | (0.00, | (0.00,  | <0.001 |
|                                  | 51.14) | 44.60) | -0.69)  |        | 66.65)  | 55.91)  | -0.73)  |        | 46.61) | 41.46) | -0.41)  |        | 43.80) | 39.34) | 0.00)*  |        |
| Sao Tome and Principe            | 1.53   | 1.62   | 0.20    |        | 5.06    | 5.37    | 0.20    |        | 0.63   | 0.70   | 0.46    |        |        |        |         |        |
|                                  | (0.00, | (0.07, | (0.15,  | <0.001 | (0.31,  | (1.47,  | (0.19,  | <0.001 | (0.00, | (0.00, | (0.28,  | <0.001 | —      | —      | —       | —      |
|                                  | 16.66) | 7.92)  | 0.25)   |        | 22.88)  | 13.72)  | 0.22)   |        | 14.96) | 6.31)  | 0.64)   |        |        |        |         |        |
| Saudi Arabia                     | 1.76   | 1.84   | 0.15    |        | 5.85    | 6.11    | 0.15    |        | 0.90   | 1.01   | 0.36    |        | 0.01   | 0.01   | 0.00    |        |
|                                  | (1.43, | (1.67, | (0.09,  | <0.001 | (5.22,  | (5.80,  | (0.12,  | <0.001 | (0.67, | (0.88, | (0.07,  | 0.015  | (0.00, | (0.00, | (0.00,  | <0.001 |
|                                  | 2.15)  | 2.02)  | 0.20)   |        | 6.53)   | 6.44)   | 0.17)   |        | 1.19)  | 1.15)  | 0.65)   |        | 0.08)  | 0.04)  | 0.00)*  |        |
|                                  | 1.49   | 1.52   | 0.07    |        | 4.94    | 5.03    | 0.06    |        | 0.56   | 0.64   | 0.41    |        |        |        |         |        |
| Senegal                          | (1.00, | (1.19, | (0.05,  | <0.001 | (4.01,  | (4.41,  | (0.04,  | <0.001 | (0.28, | (0.43, | (0.20,  | <0.001 | —      | —      | —       | —      |
|                                  | 2.13)  | 1.91)  | 0.09)   |        | 6.03)   | 5.72)   | 0.08)   |        | 1.00)  | 0.91)  | 0.61)   |        |        |        |         |        |
| Serbia                           | 2.83   | 2.83   | -0.01   |        | 9.38    | 9.40    | -0.00   |        | 1.57   | 1.43   | -0.28   |        | 0.01   | 0.01   | 0.00    |        |
|                                  | (2.32, | (2.29, | (-0.11, | 0.884  | (8.43,  | (8.40,  | (-0.07, | 0.980  | (1.20, | (1.05, | (-0.64, | 0.139  | (0.00, | (0.00, | (0.00,  | 0.060  |

|                 |        |        |         |        |         |        |         |        |        |        |         |        |        |        |         |        |
|-----------------|--------|--------|---------|--------|---------|--------|---------|--------|--------|--------|---------|--------|--------|--------|---------|--------|
|                 | 3.42)  | 3.48)  | 0.09)   |        | 10.41)  | 10.52) | 0.07)   |        | 2.03)  | 1.91)  | 0.09)   |        | 0.14)  | 0.17)  | 0.00)   |        |
|                 | 2.49   | 2.54   | 0.07    |        | 8.26    | 8.41   | 0.06    |        | 1.70   | 1.74   | 0.19    |        | 0.02   | 0.02   | 0.00    |        |
| Seychelles      | (0.01, | (0.09, | (0.03,  | <0.001 | (0.96,  | (2.18, | (0.04,  | <0.001 | (0.00, | (0.02, | (-0.57, | 0.630  | (0.00, | (0.00, | (-0.00, | 1.000  |
|                 | 20.84) | 15.64) | 0.11)   |        | 30.63)  | 24.17) | 0.08)   |        | 19.45) | 14.41) | 0.95)   |        | 16.21) | 11.66) | 0.00)   |        |
|                 | 1.60   | 1.59   | -0.02   |        | 5.32    | 5.26   | -0.04   |        | 0.59   | 0.64   | 0.26    |        |        |        |         |        |
| Sierra Leone    | (0.95, | (1.15, | (-0.06, | 0.348  | (4.05,  | (4.42, | (-0.06, | 0.002  | (0.23, | (0.38, | (-0.03, | 0.080  | —      | —      | —       | —      |
|                 | 2.54)  | 2.14)  | 0.02)   |        | 6.87)   | 6.22)  | -0.01)  |        | 1.25)  | 1.03)  | 0.56)   |        |        |        |         |        |
|                 | 3.16   | 3.15   | 0.00    |        | 10.47   | 10.53  | 0.05    |        | 1.24   | 1.13   | -0.28   |        | 0.01   |        |         |        |
| Singapore       | (2.34, | (2.56, | (-0.13, | 0.964  | (8.90,  | (9.46, | (-0.08, | 0.483  | (0.74, | (0.80, | (-0.57, | 0.065  | (0.00, | —      | —       | —      |
|                 | 4.21)  | 3.90)  | 0.13)   |        | 12.25)  | 11.75) | 0.18)   |        | 1.96)  | 1.65)  | 0.02)   |        | 0.31)  |        |         |        |
|                 | 3.35   | 3.28   | -0.06   |        | 11.13   | 10.90  | -0.05   |        | 1.49   | 1.28   | -0.49   |        | 0.01   | 0.01   | 0.00    |        |
| Slovakia        | (2.65, | (2.59, | (-0.16, | 0.274  | (9.82,  | (9.62, | (-0.14, | 0.229  | (1.04, | (0.87, | (-0.67, | <0.001 | (0.00, | (0.00, | (0.00,  | <0.001 |
|                 | 4.20)  | 4.15)  | 0.05)   |        | 12.57)  | 12.35) | 0.03)   |        | 2.10)  | 1.89)  | -0.32)  |        | 0.22)  | 0.32)  | 0.00)*  |        |
|                 | 3.14   | 3.06   | -0.09   |        | 10.45   | 10.15  | -0.10   |        | 1.17   | 1.07   | -0.38   |        |        |        |         |        |
| Slovenia        | (2.08, | (1.97, | (-0.12, | <0.001 | (8.44,  | (8.10, | (-0.13, | <0.001 | (0.57, | (0.49, | (-0.59, | <0.001 | —      | —      | —       | —      |
|                 | 4.61)  | 4.71)  | -0.06)  |        | 12.86)  | 12.72) | -0.07)  |        | 2.20)  | 2.29)  | -0.17)  |        |        |        |         |        |
|                 | 2.29   | 2.37   | 0.11    |        | 7.61    | 7.85   | 0.10    |        | 6.18   | 8.05   | 0.92    |        | 0.10   | 0.14   | 1.11    |        |
| Solomon Islands | (0.29, | (0.81, | (0.00,  | 0.042  | (2.98,  | (4.65, | (0.01,  | 0.032  | (2.15, | (4.80, | (0.81,  | <0.001 | (0.00, | (0.00, | (0.91,  | <0.001 |
|                 | 8.27)  | 5.36)  | 0.22)   |        | 15.97)  | 12.43) | 0.19)   |        | 13.95) | 12.66) | 1.02)   |        | 4.48)  | 1.90)  | 1.30)   |        |
|                 | 0.92   | 0.96   | 0.16    |        | 3.06    | 3.18   | 0.14    |        | 0.80   | 0.68   | -0.55   |        | 0.01   | 0.01   | 0.00    |        |
| Somalia         | (0.57, | (0.73, | (0.05,  | 0.005  | (2.39,  | (2.74, | (0.10,  | <0.001 | (0.48, | (0.48, | (-0.71, | <0.001 | (0.00, | (0.00, | (0.00,  | 0.048  |
|                 | 1.41)  | 1.24)  | 0.26)   |        | 3.86)   | 3.67)  | 0.19)   |        | 1.27)  | 0.92)  | -0.38)  |        | 0.20)  | 0.08)  | 0.00)*  |        |
|                 | 1.65   | 1.63   | -0.04   |        | 5.48    | 5.41   | -0.04   |        | 2.75   | 1.75   | -1.72   |        | 0.04   | 0.02   | -2.63   |        |
| South Africa    | (1.44, | (1.48, | (-0.08, | 0.071  | (5.08,  | (5.12, | (-0.06, | 0.003  | (2.47, | (1.59, | (-2.49, | <0.001 | (0.01, | (0.01, | (-5.26, | 0.057  |
|                 | 1.89)  | 1.80)  | 0.00)   |        | 5.90)   | 5.71)  | -0.01)  |        | 3.05)  | 1.92)  | -0.94)  |        | 0.10)  | 0.05)  | 0.08)   |        |
|                 | 0.93   | 0.92   | -0.01   |        | 3.07    | 3.07   | 0.00    |        | 0.85   | 0.71   | -0.61   |        | 0.01   | 0.01   | 0.00    |        |
| South Sudan     | (0.51, | (0.60, | (-0.06, | 0.874  | (2.26,  | (2.44, | (-0.05, | 0.879  | (0.46, | (0.43, | (-0.79, | <0.001 | (0.00, | (0.00, | (0.00,  | 0.005  |
|                 | 1.54)  | 1.37)  | 0.05)   |        | 4.08)   | 3.80)  | 0.05)   |        | 1.44)  | 1.11)  | -0.43)  |        | 0.27)  | 0.16)  | 0.00)*  |        |
|                 | 3.56   | 3.04   | -0.55   |        | 11.83   | 10.08  | -0.55   |        | 1.50   | 1.17   | -0.88   |        | 0.01   | 0.01   | 0.00    |        |
| Spain           | (3.26, | (2.78, | (-0.60, | <0.001 | (11.26, | (9.62, | (-0.57, | <0.001 | (1.31, | (1.01, | (-1.00, | <0.001 | (0.00, | (0.00, | (0.00,  | <0.001 |
|                 | 3.89)  | 3.31)  | -0.50)  |        | 12.41)  | 10.56) | -0.52)  |        | 1.72)  | 1.34)  | -0.75)  |        | 0.04)  | 0.04)  | 0.00)*  |        |
|                 | 2.36   | 2.42   | 0.09    |        | 7.83    | 8.02   | 0.08    |        | 0.93   | 0.95   | 0.11    |        |        |        |         |        |
| Sri Lanka       | (2.01, | (2.10, | (0.04,  | 0.001  | (7.18,  | (7.44, | (0.06,  | <0.001 | (0.71, | (0.76, | (-0.20, | 0.498  | —      | —      | —       | —      |

|                            |        |        |         |        |         |         |         |        |        |        |         |        |        |        |         |        |
|----------------------------|--------|--------|---------|--------|---------|---------|---------|--------|--------|--------|---------|--------|--------|--------|---------|--------|
|                            | 2.76)  | 2.77)  | 0.14)   |        | 8.53)   | 8.64)   | 0.11)   |        | 1.19)  | 1.18)  | 0.41)   |        |        |        |         |        |
|                            | 1.67   | 1.75   | 0.17    |        | 5.54    | 5.79    | 0.15    |        | 0.70   | 0.73   | 0.13    |        |        |        |         |        |
| Sudan                      | (1.35, | (1.53, | (0.13,  | <0.001 | (4.94,  | (5.40,  | (0.13,  | <0.001 | (0.50, | (0.60, | (0.10,  | <0.001 | —      | —      | —       | —      |
|                            | 2.04)  | 1.98)  | 0.20)   |        | 6.18)   | 6.21)   | 0.18)   |        | 0.96)  | 0.89)  | 0.15)   |        |        |        |         |        |
|                            | 0.95   | 0.99   | 0.14    |        | 3.16    | 3.29    | 0.14    |        | 1.39   | 1.45   | 0.16    |        | 0.02   | 0.02   | 0.00    |        |
| Suriname                   | (0.04, | (0.14, | (0.11,  | <0.001 | (0.80,  | (1.34,  | (0.11,  | <0.001 | (0.13, | (0.31, | (-1.08, | 0.803  | (0.00, | (0.00, | (0.00,  | <0.001 |
|                            | 4.98)  | 3.49)  | 0.17)   |        | 8.43)   | 6.76)   | 0.17)   |        | 5.66)  | 4.18)  | 1.42)   |        | 3.29)  | 1.83)  | 0.00)*  |        |
|                            | 4.46   | 4.08   | -0.42   |        | 14.79   | 13.54   | -0.42   |        | 1.56   | 1.38   | -0.43   |        | 0.01   |        |         |        |
| Sweden                     | (3.75, | (3.45, | (-0.81, | 0.036  | (13.49, | (12.36, | (-0.80, | 0.034  | (1.15, | (1.02, | (-0.61, | <0.001 | (0.00, | —      | —       | —      |
|                            | 5.26)  | 4.81)  | -0.03)  |        | 16.19)  | 14.82)  | -0.03)  |        | 2.06)  | 1.84)  | -0.25)  |        | 0.15)  |        |         |        |
|                            | 3.16   | 2.75   | -0.49   |        | 10.48   | 9.15    | -0.48   |        | 1.23   | 1.04   | -0.58   |        | 0.01   |        |         |        |
| Switzerland                | (2.54, | (2.23, | (-0.63, | <0.001 | (9.32,  | (8.17,  | (-0.65, | <0.001 | (0.86, | (0.73, | (-0.88, | <0.001 | (0.00, | —      | —       | —      |
|                            | 3.90)  | 3.40)  | -0.35)  |        | 11.75)  | 10.23)  | -0.31)  |        | 1.73)  | 1.47)  | -0.28)  |        | 0.20)  |        |         |        |
|                            | 1.73   | 1.68   | -0.12   |        | 5.73    | 5.57    | -0.10   |        | 0.77   | 0.75   | -0.11   |        |        |        |         |        |
| Syrian Arab Republic       | (1.31, | (1.33, | (-0.15, | <0.001 | (4.93,  | (4.95,  | (-0.13, | <0.001 | (0.50, | (0.53, | (-0.19, | 0.011  | —      | —      | —       | —      |
|                            | 2.24)  | 2.10)  | -0.08)  |        | 6.61)   | 6.27)   | -0.07)  |        | 1.13)  | 1.06)  | -0.03)  |        |        |        |         |        |
|                            | 2.46   | 2.38   | -0.11   |        | 8.16    | 7.90    | -0.11   |        | 0.89   | 0.92   | 0.10    |        |        |        |         |        |
| Taiwan (Province of China) | (2.15, | (2.09, | (-0.16, | <0.001 | (7.59,  | (7.37,  | (-0.14, | <0.001 | (0.71, | (0.74, | (0.06,  | <0.001 | —      | —      | —       | —      |
|                            | 2.80)  | 2.71)  | -0.06)  |        | 8.76)   | 8.47)   | -0.08)  |        | 1.11)  | 1.13)  | 0.14)   |        |        |        |         |        |
|                            | 2.57   | 2.68   | 0.14    |        | 8.52    | 8.89    | 0.14    |        | 0.93   | 1.03   | 0.37    |        |        |        |         |        |
| Tajikistan                 | (1.83, | (2.17, | (0.10,  | <0.001 | (7.10,  | (7.93,  | (0.12,  | <0.001 | (0.51, | (0.72, | (0.11,  | 0.006  | —      | —      | —       | —      |
|                            | 3.51)  | 3.27)  | 0.18)   |        | 10.14)  | 9.94)   | 0.17)   |        | 1.56)  | 1.42)  | 0.64)   |        |        |        |         |        |
|                            | 2.31   | 2.40   | 0.13    |        | 7.65    | 7.96    | 0.13    |        | 1.07   | 1.24   | 0.53    |        | 0.01   | 0.01   | 0.00    |        |
| Thailand                   | (2.11, | (2.22, | (0.09,  | <0.001 | (7.29,  | (7.64,  | (0.12,  | <0.001 | (0.94, | (1.11, | (0.26,  | <0.001 | (0.00, | (0.00, | (0.00,  | <0.001 |
|                            | 2.51)  | 2.58)  | 0.18)   |        | 8.02)   | 8.29)   | 0.15)   |        | 1.21)  | 1.37)  | 0.80)   |        | 0.03)  | 0.03)  | 0.00)*  |        |
|                            | 2.35   | 2.38   | 0.04    |        | 7.81    | 7.90    | 0.04    |        | 0.89   | 1.11   | 0.73    |        |        | 0.01   |         |        |
| Timor-Leste                | (0.87, | (1.06, | (0.00,  | 0.030  | (4.76,  | (5.25,  | (0.02,  | <0.001 | (0.13, | (0.30, | (0.42,  | <0.001 | —      | (0.00, | —       | —      |
|                            | 5.11)  | 4.60)  | 0.08)   |        | 12.08)  | 11.43)  | 0.06)   |        | 3.01)  | 2.87)  | 1.05)   |        |        | 1.08)  |         |        |
|                            | 1.50   | 1.51   | 0.03    |        | 4.97    | 5.02    | 0.04    |        | 0.60   | 0.65   | 0.35    |        |        |        |         |        |
| Togo                       | (0.84, | (1.09, | (-0.01, | 0.183  | (3.67,  | (4.21,  | (0.01,  | 0.020  | (0.22, | (0.39, | (0.27,  | <0.001 | —      | —      | —       | —      |
|                            | 2.48)  | 2.05)  | 0.07)   |        | 6.58)   | 5.93)   | 0.07)   |        | 1.32)  | 1.03)  | 0.43)   |        |        |        |         |        |
|                            | 2.36   | 2.48   | 0.17    |        | 7.81    | 8.27    | 0.19    |        | 7.37   | 7.57   | 0.02    |        | 0.13   | 0.13   | -0.05   |        |
| Tokelau                    | (0.00, | (0.00, | (0.12,  | <0.001 | (0.00,  | (0.00,  | (0.13,  | <0.001 | (0.00, | (0.00, | (-0.31, | 0.912  | (0.00, | (0.00, | (-0.75, | 0.878  |

|                                |         |         |         |        |         |         |         |        |         |         |         |        |         |         |         |        |
|--------------------------------|---------|---------|---------|--------|---------|---------|---------|--------|---------|---------|---------|--------|---------|---------|---------|--------|
|                                | 825.39) | 892.29) | 0.23)   |        | 835.56) | 904.26) | 0.26)   |        | 834.99) | 902.39) | 0.35)   |        | 821.11) | 887.51) | 0.64)   |        |
|                                | 2.41    | 2.49    | 0.10    |        | 8.00    | 8.27    | 0.11    |        | 5.12    | 5.84    | 0.47    |        | 0.08    | 0.10    | 0.85    |        |
| Tonga                          | (0.01,  | (0.03,  | (0.02,  | 0.020  | (0.92,  | (1.52,  | (0.03,  | 0.006  | (0.25,  | (0.66,  | (0.27,  | <0.001 | (0.00,  | (0.00,  | (0.85,  | <0.001 |
|                                | 20.17)  | 16.10)  | 0.18)   |        | 29.65)  | 25.47)  | 0.18)   |        | 24.85)  | 21.70)  | 0.67)   |        | 15.73)  | 11.55)  | 0.85)   |        |
| Trinidad and<br>Tobago         | 0.99    | 1.01    | 0.08    |        | 3.29    | 3.35    | 0.06    |        | 0.74    | 0.79    | 0.30    |        | 0.01    | 0.01    | 0.00    |        |
|                                | (0.30,  | (0.39,  | (-0.01, | 0.075  | (1.83,  | (2.08,  | (0.03,  | <0.001 | (0.18,  | (0.25,  | (-0.06, | 0.098  | (0.00,  | (0.00,  | (0.00,  | <0.001 |
|                                | 2.43)   | 2.32)   | 0.16)   |        | 5.46)   | 5.23)   | 0.08)   |        | 2.06)   | 2.03)   | 0.66)   |        | 0.85)   | 0.92)   | 0.00)*  |        |
|                                | 1.68    | 1.71    | 0.06    |        | 5.56    | 5.66    | 0.06    |        | 0.75    | 0.79    | 0.20    |        |         | 0.01    |         |        |
| Tunisia                        | (1.22,  | (1.37,  | (0.01,  | 0.033  | (4.69,  | (5.04,  | (0.03,  | 0.001  | (0.46,  | (0.56,  | (0.07,  | 0.002  | —       | (0.00,  | —       | —      |
|                                | 2.25)   | 2.11)   | 0.12)   |        | 6.54)   | 6.35)   | 0.09)   |        | 1.16)   | 1.08)   | 0.33)   |        |         | 0.11)   |         |        |
|                                | 1.80    | 1.80    | -0.01   |        | 5.98    | 5.97    | -0.01   |        | 0.90    | 0.76    | -0.55   |        | 0.01    |         |         |        |
| Turkey                         | (1.62,  | (1.67,  | (-0.07, | 0.735  | (5.65,  | (5.73,  | (-0.04, | 0.395  | (0.78,  | (0.67,  | (-0.70, | <0.001 | (0.00,  | —       | —       | —      |
|                                | 2.00)   | 1.94)   | 0.05)   |        | 6.33)   | 6.23)   | 0.02)   |        | 1.04)   | 0.85)   | -0.41)  |        | 0.03)   |         |         |        |
|                                | 2.58    | 2.87    | 0.37    |        | 8.56    | 9.53    | 0.38    |        | 0.94    | 1.14    | 0.68    |        |         | 0.01    |         |        |
| Turkmenistan                   | (1.76,  | (2.19,  | (0.31,  | <0.001 | (6.98,  | (8.23,  | (0.34,  | <0.001 | (0.48,  | (0.72,  | (0.61,  | <0.001 | —       | (0.00,  | —       | —      |
|                                | 3.67)   | 3.72)   | 0.43)   |        | 10.41)  | 10.98)  | 0.41)   |        | 1.68)   | 1.71)   | 0.75)   |        |         | 0.21)   |         |        |
|                                | 2.35    | 2.47    | 0.17    |        | 7.78    | 8.20    | 0.17    |        | 7.55    | 8.92    | 0.57    |        | 0.13    | 0.15    | 0.55    |        |
| Tuvalu                         | (0.00,  | (0.00,  | (0.10,  | <0.001 | (0.00,  | (0.00,  | (0.14,  | <0.001 | (0.00,  | (0.00,  | (0.52,  | <0.001 | (0.00,  | (0.00,  | (0.23,  | 0.001  |
|                                | 113.40) | 94.69)  | 0.23)   |        | 124.26) | 105.99) | 0.20)   |        | 123.75) | 107.17) | 0.62)   |        | 108.83) | 89.96)  | 0.88)   |        |
|                                | 0.97    | 0.96    | -0.02   |        | 3.20    | 3.20    | 0.00    |        | 0.76    | 0.90    | 0.56    |        | 0.01    | 0.01    | 0.00    |        |
| Uganda                         | (0.69,  | (0.79,  | (-0.06, | 0.316  | (2.68,  | (2.87,  | (-0.03, | 0.927  | (0.52,  | (0.73,  | (0.37,  | <0.001 | (0.00,  | (0.00,  | (-0.00, | 1.000  |
|                                | 1.31)   | 1.17)   | 0.02)   |        | 3.79)   | 3.56)   | 0.04)   |        | 1.07)   | 1.09)   | 0.74)   |        | 0.11)   | 0.05)   | 0.00)   |        |
|                                | 3.32    | 3.56    | 0.25    |        | 11.02   | 11.81   | 0.24    |        | 1.08    | 1.29    | 0.56    |        |         | 0.01    |         |        |
| Ukraine                        | (3.08,  | (3.30,  | (0.23,  | <0.001 | (10.58, | (11.34, | (0.23,  | <0.001 | (0.95,  | (1.14,  | (0.28,  | <0.001 | —       | (0.00,  | —       | —      |
|                                | 3.58)   | 3.84)   | 0.27)   |        | 11.47)  | 12.31)  | 0.25)   |        | 1.23)   | 1.47)   | 0.83)   |        |         | 0.05)   |         |        |
|                                | 2.08    | 2.05    | -0.06   |        | 6.91    | 6.76    | -0.08   |        | 0.93    | 1.03    | 0.13    |        | 0.01    | 0.01    | 0.00    |        |
| United Arab<br>Emirates        | (1.34,  | (1.78,  | (-0.13, | 0.048  | (5.48,  | (6.26,  | (-0.16, | 0.038  | (0.47,  | (0.84,  | (-0.29, | 0.540  | (0.00,  | (0.00,  | (-0.00, | 1.000  |
|                                | 3.24)   | 2.44)   | -0.00)  |        | 8.72)   | 7.37)   | -0.00)  |        | 1.87)   | 1.35)   | 0.55)   |        | 0.69)   | 0.25)   | 0.00)   |        |
|                                | 3.74    | 4.24    | 0.45    |        | 12.42   | 14.09   | 0.45    |        | 1.35    | 1.51    | 0.41    |        | 0.01    | 0.01    | 0.00    |        |
| United Kingdom                 | (3.49,  | (3.99,  | (0.30,  | <0.001 | (11.95, | (13.63, | (0.31,  | <0.001 | (1.20,  | (1.36,  | (0.23,  | <0.001 | (0.00,  | (0.00,  | (0.00,  | <0.001 |
|                                | 4.01)   | 4.51)   | 0.60)   |        | 12.90)  | 14.55)  | 0.58)   |        | 1.51)   | 1.67)   | 0.60)   |        | 0.03)   | 0.03)   | 0.00)*  |        |
| United Republic of<br>Tanzania | 1.03    | 1.06    | 0.12    | 0.086  | 3.42    | 3.51    | 0.09    | 0.002  | 0.91    | 0.88    | -0.17   | 0.002  | 0.01    | 0.01    | 0.00    | <0.001 |
|                                | (0.80,  | (0.91,  | (-0.02, |        | (2.99,  | (3.23,  | (0.04,  |        | (0.70,  | (0.74,  | (-0.28, |        | (0.00,  | (0.00,  | (0.00,  |        |

|                                    |        |        |         |        |         |         |         |        |        |        |         |        |        |        |         |        |
|------------------------------------|--------|--------|---------|--------|---------|---------|---------|--------|--------|--------|---------|--------|--------|--------|---------|--------|
|                                    | 1.30)  | 1.22)  | 0.25)   |        | 3.88)   | 3.80)   | 0.15)   |        | 1.17)  | 1.03)  | -0.06)  | 0.08)  | 0.04)  | 0.00)* |         |        |
| United States of America           | 4.47   | 5.60   | 0.77    |        | 14.85   | 18.57   | 0.77    |        | 1.54   | 1.93   | 0.78    | 0.01   | 0.01   | 0.00   |         |        |
|                                    | (4.35, | (5.46, | (0.67,  | <0.001 | (14.63, | (18.32, | (0.69,  | <0.001 | (1.47, | (1.86, | (0.66,  | <0.001 | (0.00, | (0.00, | (0.00,  | 1.000  |
|                                    | 4.60)  | 5.73)  | 0.88)   |        | 15.08)  | 18.81)  | 0.85)   |        | 1.62)  | 2.01)  | 0.90)   | 0.01)  | 0.01)  | 0.00)  |         |        |
| United States Virgin Islands       | 0.95   | 0.98   | 0.11    |        | 3.15    | 3.25    | 0.11    |        | 1.43   | 1.09   | -1.01   | 0.02   | 0.01   | -2.26  |         |        |
|                                    | (0.00, | (0.00, | (0.03,  | 0.012  | (0.17,  | (0.12,  | (0.08,  | <0.001 | (0.00, | (0.00, | (-1.63, | 0.002  | (0.00, | (0.00, | (-2.26, | <0.001 |
|                                    | 12.01) | 14.94) | 0.20)   |        | 15.72)  | 18.67)  | 0.14)   |        | 12.89) | 15.15) | -0.38)  | 10.30) | 13.24) | -2.26) |         |        |
| Uruguay                            | 2.00   | 2.05   | 0.08    |        | 6.65    | 6.80    | 0.08    |        | 0.82   | 0.80   | -0.16   |        |        |        |         |        |
|                                    | (1.26, | (1.34, | (0.01,  | 0.021  | (5.22,  | (5.44,  | (0.05,  | <0.001 | (0.38, | (0.39, | (-0.27, | 0.004  | —      | —      | —       | —      |
|                                    | 3.03)  | 3.02)  | 0.14)   |        | 8.35)   | 8.40)   | 0.11)   |        | 1.55)  | 1.48)  | -0.05)  |        |        |        |         |        |
| Uzbekistan                         | 2.51   | 2.69   | 0.24    |        | 8.33    | 8.92    | 0.24    |        | 0.91   | 1.08   | 0.59    |        | 0.01   |        |         |        |
|                                    | (2.15, | (2.42, | (0.19,  | <0.001 | (7.65,  | (8.43,  | (0.21,  | <0.001 | (0.70, | (0.91, | (0.35,  | <0.001 | —      | (0.00, | —       | —      |
|                                    | 2.91)  | 2.98)  | 0.29)   |        | 9.04)   | 9.44)   | 0.26)   |        | 1.17)  | 1.26)  | 0.82)   |        | 0.04)  |        |         |        |
| Vanuatu                            | 2.52   | 2.51   | -0.01   |        | 8.36    | 8.33    | -0.01   |        | 4.73   | 7.91   | 1.76    | 0.08   | 0.14   | 1.96   |         |        |
|                                    | (0.11, | (0.42, | (-0.04, | 0.419  | (2.26,  | (3.65,  | (-0.04, | 0.524  | (0.69, | (3.42, | (1.52,  | <0.001 | (0.00, | (0.00, | (1.20,  | <0.001 |
|                                    | 12.49) | 8.06)  | 0.02)   |        | 21.53)  | 16.26)  | 0.02)   |        | 16.03) | 15.64) | 2.00)   | 8.02)  | 4.04)  | 2.74)  |         |        |
| Venezuela (Bolivarian Republic of) | 1.03   | 1.02   | -0.04   |        | 3.43    | 3.37    | -0.05   |        | 0.67   | 0.72   | 0.28    | 0.01   | 0.01   | 0.00   |         |        |
|                                    | (0.81, | (0.84, | (-0.11, | 0.190  | (3.00,  | (3.05,  | (-0.09, | 0.003  | (0.49, | (0.58, | (-0.18, | 0.238  | (0.00, | (0.00, | (0.00,  | <0.001 |
|                                    | 1.30)  | 1.22)  | 0.02)   |        | 3.90)   | 3.72)   | -0.02)  |        | 0.90)  | 0.90)  | 0.74)   | 0.07)  | 0.05)  | 0.00)* |         |        |
| Viet Nam                           | 2.34   | 2.55   | 0.30    |        | 7.75    | 8.47    | 0.30    |        | 1.19   | 1.41   | 0.55    | 0.01   | 0.01   | 0.00   |         |        |
|                                    | (2.14, | (2.41, | (0.24,  | <0.001 | (7.39,  | (8.20,  | (0.28,  | <0.001 | (1.05, | (1.30, | (0.37,  | <0.001 | (0.00, | (0.00, | (0.00,  | <0.001 |
|                                    | 2.55)  | 2.71)  | 0.36)   |        | 8.13)   | 8.75)   | 0.32)   |        | 1.34)  | 1.52)  | 0.73)   | 0.03)  | 0.03)  | 0.00)* |         |        |
| Yemen                              | 1.63   | 1.67   | 0.08    |        | 5.40    | 5.56    | 0.10    |        | 0.65   | 0.70   | 0.25    |        |        |        |         |        |
|                                    | (1.24, | (1.45, | (0.04,  | <0.001 | (4.67,  | (5.13,  | (0.08,  | <0.001 | (0.42, | (0.56, | (0.15,  | <0.001 | —      | —      | —       | —      |
|                                    | 2.09)  | 1.93)  | 0.12)   |        | 6.20)   | 6.00)   | 0.12)   |        | 0.97)  | 0.88)  | 0.35)   |        |        |        |         |        |
| Zambia                             | 0.94   | 0.96   | 0.06    |        | 3.11    | 3.17    | 0.07    |        | 0.79   | 0.96   | 0.70    | 0.01   | 0.01   | 0.00   |         |        |
|                                    | (0.56, | (0.72, | (0.03,  | 0.001  | (2.37,  | (2.73,  | (0.04,  | <0.001 | (0.44, | (0.73, | (0.56,  | <0.001 | (0.00, | (0.00, | (0.00,  | <0.001 |
|                                    | 1.48)  | 1.24)  | 0.10)   |        | 4.02)   | 3.67)   | 0.11)   |        | 1.29)  | 1.25)  | 0.84)   | 0.22)  | 0.09)  | 0.00)* |         |        |
| Zimbabwe                           | 1.42   | 1.44   | 0.06    |        | 4.71    | 4.78    | 0.06    |        | 0.61   | 0.67   | 0.37    |        |        |        |         |        |
|                                    | (1.01, | (1.13, | (-0.02, | 0.151  | (3.93,  | (4.20,  | (0.01,  | 0.015  | (0.35, | (0.47, | (0.02,  | 0.036  | —      | —      | —       | —      |
|                                    | 1.93)  | 1.80)  | 0.14)   |        | 5.59)   | 5.41)   | 0.11)   |        | 0.97)  | 0.93)  | 0.71)   |        |        |        |         |        |
| <b>Women</b>                       |        |        |         |        |         |         |         |        |        |        |         |        |        |        |         |        |
| Afghanistan                        | 1.22   | 1.23   | 0.03    | 0.162  | 4.04    | 4.09    | 0.06    | 0.007  | 0.52   | 0.53   | 0.10    | 0.002  | —      | —      | —       | —      |

|                        |                  |                  |                   |        |                  |                  |                   |        |                  |                  |                   |        |                  |                  |                  |
|------------------------|------------------|------------------|-------------------|--------|------------------|------------------|-------------------|--------|------------------|------------------|-------------------|--------|------------------|------------------|------------------|
|                        | (0.71,<br>1.98)  | (0.93,<br>1.60)  | (-0.01,<br>0.07)  |        | (3.07,<br>5.25)  | (3.52,<br>4.73)  | (0.02,<br>0.10)   |        | (0.21,<br>1.09)  | (0.34,<br>0.79)  | (0.04,<br>0.16)   |        |                  |                  |                  |
|                        | 1.14             | 1.15             | -0.00             |        | 3.77             | 3.80             | 0.03              |        | 0.56             | 0.57             | 0.05              |        |                  |                  |                  |
| Albania                | (0.44,<br>2.40)  | (0.38,<br>2.67)  | (-0.06,<br>0.05)  | 0.906  | (2.34,<br>5.75)  | (2.22,<br>6.10)  | (-0.02,<br>0.08)  | 0.265  | (0.13,<br>1.59)  | (0.10,<br>1.83)  | (-0.04,<br>0.14)  | 0.298  | —                | —                | —                |
|                        | 1.24             | 1.26             | 0.03              |        | 4.11             | 4.19             | 0.07              |        | 0.62             | 0.65             | 0.18              |        |                  | 0.01             |                  |
| Algeria                | (0.90,<br>1.66)  | (1.05,<br>1.51)  | (-0.02,<br>0.09)  | 0.259  | (3.47,<br>4.84)  | (3.80,<br>4.63)  | (0.03,<br>0.10)   | <0.001 | (0.39,<br>0.93)  | (0.50,<br>0.84)  | (0.15,<br>0.21)   | <0.001 | —                | (0.00,<br>0.06)  | —                |
|                        | 2.24             | 2.32             | 0.12              |        | 7.44             | 7.70             | 0.11              |        | 7.66             | 9.17             | 0.64              |        | 0.13             | 0.16             | 0.74             |
| American Samoa         | (0.00,<br>52.23) | (0.00,<br>50.23) | (0.04,<br>0.20)   | 0.003  | (0.02,<br>62.14) | (0.04,<br>60.07) | (0.07,<br>0.15)   | <0.001 | (0.02,<br>62.40) | (0.10,<br>62.74) | (0.46,<br>0.81)   | <0.001 | (0.00,<br>48.02) | (0.00,<br>45.98) | (0.27,<br>1.22)  |
|                        | 1.06             | 0.91             | -0.54             |        | 3.52             | 3.03             | -0.52             |        | 0.65             | 0.58             | -0.37             |        | 0.01             | 0.01             | 0.00             |
| Andorra                | (0.00,<br>44.47) | (0.00,<br>40.86) | (-0.59,<br>-0.49) | <0.001 | (0.00,<br>48.41) | (0.00,<br>43.69) | (-0.58,<br>-0.46) | <0.001 | (0.00,<br>43.80) | (0.00,<br>40.41) | (-0.53,<br>-0.22) | <0.001 | (0.00,<br>42.78) | (0.00,<br>39.60) | (0.00,<br>0.00)  |
|                        | 1.21             | 1.23             | 0.08              |        | 4.00             | 4.08             | 0.08              |        | 0.79             | 0.87             | 0.32              |        | 0.01             | 0.01             | 0.00             |
| Angola                 | (0.72,<br>1.89)  | (0.93,<br>1.60)  | (-0.04,<br>0.19)  | 0.195  | (3.06,<br>5.13)  | (3.51,<br>4.71)  | (0.03,<br>0.14)   | 0.002  | (0.41,<br>1.37)  | (0.63,<br>1.19)  | (0.21,<br>0.43)   | <0.001 | (0.00,<br>0.26)  | (0.00,<br>0.10)  | (0.00,<br>0.00)* |
|                        | 0.70             | 0.72             | 0.09              |        | 2.32             | 2.38             | 0.09              |        | 0.85             | 0.67             | -0.83             |        | 0.01             | 0.01             | 0.00             |
| Antigua and<br>Barbuda | (0.00,<br>32.70) | (0.00,<br>25.36) | (-0.01,<br>0.19)  | 0.068  | (0.00,<br>35.93) | (0.00,<br>28.18) | (0.04,<br>0.15)   | 0.001  | (0.00,<br>32.98) | (0.00,<br>25.29) | (-1.05,<br>-0.62) | <0.001 | (0.00,<br>31.29) | (0.00,<br>24.12) | (0.00,<br>0.00)* |
|                        | 0.99             | 1.03             | 0.14              |        | 3.30             | 3.42             | 0.12              |        | 0.73             | 0.65             | -0.42             |        | 0.01             | 0.01             | 0.00             |
| Argentina              | (0.76,<br>1.28)  | (0.83,<br>1.26)  | (0.09,<br>0.20)   | <0.001 | (2.85,<br>3.79)  | (3.06,<br>3.82)  | (0.05,<br>0.18)   | <0.001 | (0.53,<br>0.98)  | (0.50,<br>0.84)  | (-0.54,<br>-0.29) | <0.001 | (0.00,<br>0.08)  | (0.00,<br>0.06)  | (0.00,<br>0.00)* |
|                        | 1.46             | 1.48             | 0.07              |        | 4.84             | 4.92             | 0.06              |        | 0.62             | 0.65             | 0.19              |        |                  |                  |                  |
| Armenia                | (0.71,<br>2.68)  | (0.72,<br>2.97)  | (0.02,<br>0.11)   | 0.007  | (3.34,<br>6.79)  | (3.41,<br>7.09)  | (0.04,<br>0.08)   | <0.001 | (0.19,<br>1.57)  | (0.20,<br>1.91)  | (0.04,<br>0.33)   | 0.014  | —                | —                | —                |
|                        | 2.51             | 2.40             | -0.16             |        | 8.34             | 7.95             | -0.17             |        | 0.90             | 0.85             | -0.19             |        |                  |                  |                  |
| Australia              | (2.02,<br>3.09)  | (1.98,<br>2.89)  | (-0.20,<br>-0.12) | <0.001 | (7.43,<br>9.34)  | (7.18,<br>8.80)  | (-0.19,<br>-0.15) | <0.001 | (0.62,<br>1.28)  | (0.61,<br>1.17)  | (-0.25,<br>-0.14) | <0.001 | —                | —                | —                |
|                        | 1.00             | 1.07             | 0.27              |        | 3.31             | 3.53             | 0.24              |        | 0.61             | 0.61             | -0.02             |        | 0.01             | 0.01             | 0.00             |
| Austria                | (0.55,<br>1.69)  | (0.62,<br>1.77)  | (0.09,<br>0.45)   | 0.004  | (2.44,<br>4.42)  | (2.68,<br>4.63)  | (0.12,<br>0.36)   | <0.001 | (0.28,<br>1.20)  | (0.29,<br>1.20)  | (-0.30,<br>0.26)  | 0.884  | (0.00,<br>0.33)  | (0.00,<br>0.38)  | (0.00,<br>0.00)* |
|                        | 1.44             | 1.49             | 0.12              | <0.001 | 4.78             | 4.93             | 0.10              | <0.001 | 0.58             | 0.63             | 0.25              | <0.001 | —                | —                | —                |
| Azerbaijan             |                  |                  |                   |        |                  |                  |                   |        |                  |                  |                   |        |                  |                  |                  |

|            |                  |                  |                   |        |                  |                  |                   |        |                  |                  |                   |        |                  |                 |                  |        |
|------------|------------------|------------------|-------------------|--------|------------------|------------------|-------------------|--------|------------------|------------------|-------------------|--------|------------------|-----------------|------------------|--------|
|            | (0.87,<br>2.26)  | (1.03,<br>2.11)  | (0.06,<br>0.18)   |        | (3.66,<br>6.14)  | (4.07,<br>5.96)  | (0.08,<br>0.12)   |        | (0.25,<br>1.17)  | (0.35,<br>1.08)  | (0.12,<br>0.39)   |        |                  |                 |                  |        |
|            | 0.74             | 0.73             | -0.01             |        | 2.44             | 2.42             | -0.03             |        | 1.27             | 1.28             | -0.23             |        | 0.02             | 0.02            | 0.00             |        |
| Bahamas    | (0.00,<br>8.98)  | (0.00,<br>6.57)  | (-0.09,<br>0.07)  | 0.792  | (0.11,<br>12.02) | (0.28,<br>9.31)  | (-0.07,<br>0.01)  | 0.090  | (0.01,<br>9.93)  | (0.04,<br>7.51)  | (-0.59,<br>0.13)  | 0.212  | (0.00,<br>7.59)  | (0.00,<br>5.29) | (0.00,<br>0.00)* | <0.001 |
|            | 1.31             | 1.29             | -0.06             |        | 4.35             | 4.28             | -0.05             |        | 0.66             | 0.61             | -0.29             |        |                  |                 |                  |        |
| Bahrain    | (0.05,<br>7.02)  | (0.37,<br>3.79)  | (-0.10,<br>-0.02) | 0.005  | (1.07,<br>11.80) | (2.37,<br>7.56)  | (-0.07,<br>-0.03) | <0.001 | (0.00,<br>5.89)  | (0.07,<br>2.87)  | (-0.55,<br>-0.02) | 0.034  | —                | —               | —                | —      |
|            | 1.86             | 1.86             | -0.01             |        | 6.18             | 6.17             | -0.01             |        | 0.77             | 0.80             | 0.35              |        |                  | 0.01            |                  |        |
| Bangladesh | (1.65,<br>2.09)  | (1.71,<br>2.01)  | (-0.06,<br>0.04)  | 0.720  | (5.78,<br>6.59)  | (5.90,<br>6.45)  | (-0.04,<br>0.03)  | 0.726  | (0.63,<br>0.92)  | (0.71,<br>0.90)  | (0.27,<br>0.43)   | <0.001 | —                | (0.00,<br>0.02) | —                | —      |
|            | 0.73             | 0.73             | -0.01             |        | 2.41             | 2.44             | 0.05              |        | 0.66             | 0.65             | -0.08             |        | 0.01             | 0.01            | 0.00             |        |
| Barbados   | (0.00,<br>8.62)  | (0.00,<br>9.54)  | (-0.14,<br>0.13)  | 0.946  | (0.14,<br>11.52) | (0.15,<br>12.25) | (0.01,<br>0.10)   | 0.031  | (0.00,<br>8.49)  | (0.00,<br>9.41)  | (-0.44,<br>0.29)  | 0.687  | (0.00,<br>7.28)  | (0.00,<br>8.30) | (0.00,<br>0.00)* | <0.001 |
|            | 1.63             | 1.73             | 0.19              |        | 5.40             | 5.75             | 0.21              |        | 0.60             | 0.66             | 0.27              |        |                  |                 |                  |        |
| Belarus    | (1.13,<br>2.28)  | (1.21,<br>2.48)  | (0.14,<br>0.23)   | <0.001 | (4.46,<br>6.49)  | (4.76,<br>6.95)  | (0.19,<br>0.23)   | <0.001 | (0.32,<br>1.05)  | (0.36,<br>1.22)  | (-0.23,<br>0.77)  | 0.298  | —                | —               | —                | —      |
|            | 0.97             | 1.11             | 0.48              |        | 3.21             | 3.69             | 0.48              |        | 0.64             | 0.61             | -0.15             |        | 0.01             | 0.01            | 0.00             |        |
| Belgium    | (0.58,<br>1.53)  | (0.70,<br>1.71)  | (0.35,<br>0.61)   | <0.001 | (2.47,<br>4.12)  | (2.91,<br>4.65)  | (0.37,<br>0.59)   | <0.001 | (0.34,<br>1.13)  | (0.32,<br>1.09)  | (-0.32,<br>0.02)  | 0.076  | (0.00,<br>0.26)  | (0.00,<br>0.27) | (0.00,<br>0.00)* | <0.001 |
|            | 0.72             | 0.74             | 0.10              |        | 2.38             | 2.47             | 0.12              |        | 0.62             | 0.79             | 0.83              |        | 0.01             | 0.01            | 0.00             |        |
| Belize     | (0.00,<br>16.63) | (0.00,<br>6.05)  | (-0.00,<br>0.20)  | 0.055  | (0.01,<br>19.79) | (0.29,<br>8.97)  | (0.07,<br>0.17)   | <0.001 | (0.00,<br>16.43) | (0.00,<br>6.13)  | (0.02,<br>1.64)   | 0.044  | (0.00,<br>15.23) | (0.00,<br>4.63) | (0.00,<br>0.00)* | <0.001 |
|            | 1.26             | 1.29             | 0.08              |        | 4.19             | 4.27             | 0.07              |        | 0.50             | 0.55             | 0.36              |        |                  |                 |                  |        |
| Benin      | (0.58,<br>2.39)  | (0.83,<br>1.91)  | (0.04,<br>0.12)   | <0.001 | (2.82,<br>5.99)  | (3.39,<br>5.31)  | (0.04,<br>0.10)   | <0.001 | (0.12,<br>1.35)  | (0.27,<br>0.99)  | (0.28,<br>0.45)   | <0.001 | —                | —               | —                | —      |
|            | 0.76             | 0.75             | -0.06             |        | 2.53             | 2.48             | -0.07             |        | 0.56             | 0.41             | -1.17             |        | 0.01             |                 |                  |        |
| Bermuda    | (0.00,<br>42.18) | (0.00,<br>53.68) | (-0.11,<br>-0.00) | 0.039  | (0.00,<br>44.77) | (0.00,<br>56.09) | (-0.14,<br>-0.00) | 0.038  | (0.00,<br>41.89) | (0.00,<br>53.20) | (-1.48,<br>-0.87) | <0.001 | (0.00,<br>41.08) | —               | —                | —      |
|            | 1.94             | 1.92             | -0.05             |        | 6.44             | 6.38             | -0.04             |        | 0.68             | 0.73             | 0.29              |        |                  |                 |                  |        |
| Bhutan     | (0.17,<br>7.87)  | (0.40,<br>5.60)  | (-0.08,<br>-0.02) | 0.002  | (2.22,<br>14.56) | (3.06,<br>11.73) | (-0.07,<br>-0.02) | 0.001  | (0.00,<br>5.75)  | (0.03,<br>3.71)  | (0.21,<br>0.38)   | <0.001 | —                | —               | —                | —      |
|            | 0.27             | 0.29             | 0.22              | 0.187  | 0.89             | 0.97             | 0.29              | <0.001 | 1.13             | 1.03             | -0.32             | <0.001 | 0.02             | 0.02            | 0.00             | <0.001 |



|                             |                          |                         |                            |        |                          |                          |                            |        |                         |                         |                            |        |                 |                 |                  |        |
|-----------------------------|--------------------------|-------------------------|----------------------------|--------|--------------------------|--------------------------|----------------------------|--------|-------------------------|-------------------------|----------------------------|--------|-----------------|-----------------|------------------|--------|
| (Plurinational<br>State of) | (0.05,<br>0.81)          | (0.11,<br>0.62)         | (-0.11,<br>0.55)           |        | (0.41,<br>1.67)          | (0.60,<br>1.47)          | (0.20,<br>0.38)            |        | (0.58,<br>1.98)         | (0.65,<br>1.54)         | (-0.44,<br>-0.19)          |        | (0.00,<br>0.40) | (0.00,<br>0.20) | (0.00,<br>0.00)* |        |
| Bosnia and<br>Herzegovina   | 1.21<br>(0.61,<br>2.16)  | 1.19<br>(0.49,<br>2.57) | -0.07<br>(-0.11,<br>-0.02) | 0.003  | 4.02<br>(2.84,<br>5.53)  | 3.95<br>(2.53,<br>5.98)  | -0.06<br>(-0.11,<br>-0.01) | 0.020  | 0.55<br>(0.19,<br>1.29) | 0.60<br>(0.15,<br>1.78) | 0.28<br>(0.13,<br>0.43)    | <0.001 | —               | —               | —                | —      |
| Botswana                    | 1.25<br>(0.21,<br>4.02)  | 1.28<br>(0.52,<br>2.67) | 0.09<br>(0.04,<br>0.13)    | <0.001 | 4.15<br>(1.82,<br>8.11)  | 4.23<br>(2.70,<br>6.37)  | 0.07<br>(0.05,<br>0.10)    | <0.001 | 1.02<br>(0.13,<br>3.67) | 1.04<br>(0.37,<br>2.34) | 0.06<br>(-0.22,<br>0.33)   | 0.688  | (0.00,<br>1.92) | (0.00,<br>0.79) | (-0.00,<br>0.00) | 1.000  |
| Brazil                      | 1.13<br>(1.01,<br>1.26)  | 1.14<br>(1.05,<br>1.24) | 0.13<br>(-0.00,<br>0.26)   | 0.056  | 3.74<br>(3.52,<br>3.98)  | 3.79<br>(3.62,<br>3.96)  | 0.13<br>(0.02,<br>0.23)    | 0.024  | 1.07<br>(0.95,<br>1.20) | 1.17<br>(1.07,<br>1.27) | 0.35<br>(0.10,<br>0.60)    | 0.006  | (0.00,<br>0.04) | (0.01,<br>0.03) | (-1.88,<br>6.79) | 0.279  |
| Brunei Darussalam           | 0.81<br>(0.00,<br>8.95)  | 0.74<br>(0.01,<br>5.98) | -0.31<br>(-0.44,<br>-0.17) | <0.001 | 2.68<br>(0.16,<br>12.26) | 2.46<br>(0.41,<br>8.60)  | -0.30<br>(-0.33,<br>-0.27) | <0.001 | 0.70<br>(0.00,<br>8.75) | 0.66<br>(0.00,<br>5.86) | -0.16<br>(-0.29,<br>-0.03) | 0.013  | (0.00,<br>7.40) | (0.00,<br>4.78) | (-0.00,<br>0.00) | 1.000  |
| Bulgaria                    | 1.21<br>(0.74,<br>1.89)  | 1.17<br>(0.65,<br>2.05) | -0.10<br>(-0.22,<br>0.01)  | 0.081  | 4.02<br>(3.13,<br>5.12)  | 3.89<br>(2.89,<br>5.22)  | -0.12<br>(-0.17,<br>-0.08) | <0.001 | 1.67<br>(1.10,<br>2.45) | 1.65<br>(1.01,<br>2.64) | -0.02<br>(-0.26,<br>0.22)  | 0.879  | (0.00,<br>0.31) | (0.00,<br>0.56) | (0.35,<br>0.35)  | <0.001 |
| Burkina Faso                | 1.30<br>(0.76,<br>2.06)  | 1.29<br>(0.95,<br>1.72) | -0.01<br>(-0.03,<br>0.02)  | 0.508  | 4.30<br>(3.26,<br>5.57)  | 4.28<br>(3.64,<br>5.02)  | -0.02<br>(-0.04,<br>0.01)  | 0.179  | 0.52<br>(0.21,<br>1.07) | 0.55<br>(0.34,<br>0.85) | 0.26<br>(0.18,<br>0.34)    | <0.001 | —               | —               | —                | —      |
| Burundi                     | 0.83<br>(0.33,<br>1.72)  | 0.82<br>(0.46,<br>1.36) | -0.04<br>(-0.04,<br>-0.04) | <0.001 | 2.74<br>(1.72,<br>4.13)  | 2.73<br>(2.02,<br>3.61)  | -0.01<br>(-0.04,<br>0.01)  | 0.321  | 0.90<br>(0.38,<br>1.81) | 0.71<br>(0.38,<br>1.21) | -0.82<br>(-1.01,<br>-0.63) | <0.001 | (0.00,<br>0.49) | (0.00,<br>0.22) | (0.00,<br>0.00)* | 0.010  |
| Cabo Verde                  | 1.32<br>(0.00,<br>10.76) | 1.33<br>(0.10,<br>5.71) | 0.03<br>(-0.03,<br>0.08)   | 0.340  | 4.37<br>(0.53,<br>15.92) | 4.40<br>(1.42,<br>10.34) | 0.02<br>(-0.01,<br>0.06)   | 0.138  | 0.73<br>(0.00,<br>9.69) | 0.73<br>(0.01,<br>4.70) | -0.06<br>(-0.24,<br>0.13)  | 0.554  | (0.00,<br>8.30) | (0.00,<br>3.35) | (0.00,<br>0.00)* | <0.001 |
| Cambodia                    | 2.06<br>(1.44,<br>2.88)  | 2.21<br>(1.74,<br>2.77) | 0.24<br>(0.18,<br>0.29)    | <0.001 | 6.85<br>(5.65,<br>8.23)  | 7.33<br>(6.45,<br>8.30)  | 0.23<br>(0.21,<br>0.25)    | <0.001 | 0.78<br>(0.42,<br>1.34) | 0.94<br>(0.65,<br>1.33) | 0.70<br>(0.55,<br>0.85)    | <0.001 | —               | (0.00,<br>0.12) | —                | —      |
| Cameroon                    | 1.30<br>(0.78,<br>2.03)  | 1.33<br>(1.03,<br>1.70) | 0.09<br>(0.01,<br>0.16)    | 0.022  | 4.30<br>(3.30,<br>5.51)  | 4.42<br>(3.85,<br>5.05)  | 0.10<br>(0.07,<br>0.14)    | <0.001 | 0.55<br>(0.24,<br>1.09) | 0.61<br>(0.41,<br>0.87) | 0.36<br>(0.26,<br>0.46)    | <0.001 | —               | —               | —                | —      |
| Canada                      | 2.93                     | 2.87                    | -0.08                      | <0.001 | 9.72                     | 9.54                     | -0.07                      | <0.001 | 1.03                    | 1.05                    | -0.03                      | 0.223  | —               | —               | —                | —      |

|                          |         |         |         |        |         |         |         |        |         |         |         |        |         |         |         |        |
|--------------------------|---------|---------|---------|--------|---------|---------|---------|--------|---------|---------|---------|--------|---------|---------|---------|--------|
|                          | (2.52,  | (2.48,  | (-0.09, |        | (8.97,  | (8.82,  | (-0.08, |        | (0.80,  | (0.82,  | (-0.09, |        |         |         |         |        |
|                          | 3.39)   | 3.32)   | -0.06)  |        | 10.53)  | 10.31)  | -0.05)  |        | 1.32)   | 1.33)   | 0.02)   |        |         |         |         |        |
| Central African Republic | 1.25    | 1.22    | -0.07   |        | 4.13    | 4.05    | -0.08   |        | 0.77    | 0.71    | -0.35   |        | 0.01    | 0.01    | 0.00    |        |
|                          | (0.40,  | (0.60,  | (-0.14, | 0.021  | (2.36,  | (2.81,  | (-0.13, | 0.004  | (0.16,  | (0.26,  | (-0.43, | <0.001 | (0.00,  | (0.00,  | (0.00,  | 0.003  |
|                          | 2.94)   | 2.22)   | -0.01)  |        | 6.71)   | 5.65)   | -0.03)  |        | 2.25)   | 1.54)   | -0.26)  |        | 0.99)   | 0.45)   | 0.00)*  |        |
| Chad                     | 1.24    | 1.24    | 0.01    |        | 4.11    | 4.11    | -0.00   |        | 0.49    | 0.51    | 0.14    |        |         |         |         |        |
|                          | (0.62,  | (0.82,  | (-0.08, | 0.877  | (2.88,  | (3.30,  | (-0.03, | 0.945  | (0.14,  | (0.26,  | (0.01,  | 0.036  | —       | —       | —       | —      |
|                          | 2.22)   | 1.80)   | 0.09)   |        | 5.68)   | 5.06)   | 0.03)   |        | 1.21)   | 0.92)   | 0.27)   |        |         |         |         |        |
| Chile                    | 1.06    | 1.09    | 0.11    |        | 3.50    | 3.63    | 0.12    |        | 0.85    | 0.84    | -0.06   |        | 0.01    | 0.01    | 0.00    |        |
|                          | (0.70,  | (0.78,  | (-0.02, | 0.097  | (2.82,  | (3.04,  | (-0.02, | 0.086  | (0.54,  | (0.57,  | (-0.24, | 0.552  | (0.00,  | (0.00,  | (0.00,  | <0.001 |
|                          | 1.53)   | 1.50)   | 0.23)   |        | 4.31)   | 4.32)   | 0.27)   |        | 1.29)   | 1.21)   | 0.13)   |        | 0.17)   | 0.15)   | 0.00)*  |        |
| China                    | 2.31    | 2.45    | 0.19    |        | 7.65    | 8.14    | 0.19    |        | 0.87    | 0.90    | 0.10    |        |         |         |         |        |
|                          | (2.25,  | (2.40,  | (0.13,  | <0.001 | (7.54,  | (8.04,  | (0.13,  | <0.001 | (0.84,  | (0.86,  | (-0.02, | 0.091  | —       | —       | —       | —      |
|                          | 2.37)   | 2.51)   | 0.25)   |        | 7.77)   | 8.25)   | 0.26)   |        | 0.91)   | 0.93)   | 0.21)   |        |         |         |         |        |
| Colombia                 | 0.76    | 0.75    | -0.02   |        | 2.52    | 2.50    | -0.02   |        | 0.78    | 0.84    | 0.33    |        | 0.01    | 0.01    | 0.00    |        |
|                          | (0.55,  | (0.59,  | (-0.09, | 0.672  | (2.13,  | (2.20,  | (-0.07, | 0.378  | (0.58,  | (0.67,  | (0.22,  | <0.001 | (0.00,  | (0.00,  | (0.00,  | <0.001 |
|                          | 1.01)   | 0.95)   | 0.06)   |        | 2.96)   | 2.84)   | 0.03)   |        | 1.04)   | 1.04)   | 0.45)   |        | 0.08)   | 0.06)   | 0.00)*  |        |
| Comoros                  | 0.77    | 0.78    | 0.00    |        | 2.57    | 2.59    | 0.03    |        | 0.84    | 0.85    | 0.06    |        | 0.01    | 0.01    | 0.00    |        |
|                          | (0.00,  | (0.02,  | (-0.11, | 0.948  | (0.21,  | (0.59,  | (-0.01, | 0.165  | (0.00,  | (0.03,  | (-1.29, | 0.929  | (0.00,  | (0.00,  | (0.00,  | <0.001 |
|                          | 7.48)   | 4.38)   | 0.11)   |        | 10.59)  | 7.24)   | 0.06)   |        | 7.59)   | 4.48)   | 1.44)   |        | 6.01)   | 2.94)   | 0.00)*  |        |
| Congo                    | 1.27    | 1.23    | -0.10   |        | 4.20    | 4.07    | -0.11   |        | 0.84    | 0.86    | 0.16    |        | 0.01    | 0.01    | 0.00    |        |
|                          | (0.38,  | (0.65,  | (-0.17, | 0.003  | (2.34,  | (2.94,  | (-0.13, | <0.001 | (0.17,  | (0.39,  | (-0.05, | 0.137  | (0.00,  | (0.00,  | (0.00,  | <0.001 |
|                          | 3.10)   | 2.11)   | -0.03)  |        | 6.96)   | 5.50)   | -0.08)  |        | 2.47)   | 1.64)   | 0.36)   |        | 1.08)   | 0.37)   | 0.00)*  |        |
| Cook Islands             | 2.17    | 2.27    | 0.15    |        | 7.20    | 7.52    | 0.14    |        | 10.51   | 7.91    | -0.98   |        | 0.19    | 0.14    | -1.07   |        |
|                          | (0.00,  | (0.00,  | (0.08,  | <0.001 | (0.00,  | (0.00,  | (0.11,  | <0.001 | (0.00,  | (0.00,  | (-1.03, | <0.001 | (0.00,  | (0.00,  | (-1.26, | <0.001 |
|                          | 125.30) | 128.46) | 0.22)   |        | 135.16) | 138.84) | 0.17)   |        | 141.54) | 139.65) | -0.93)  |        | 121.28) | 124.11) | -0.88)  |        |
| Costa Rica               | 0.76    | 0.75    | -0.03   |        | 2.54    | 2.50    | -0.05   |        | 0.54    | 0.54    | 0.06    |        | 0.01    | 0.01    |         |        |
|                          | (0.22,  | (0.32,  | (-0.09, | 0.316  | (1.38,  | (1.63,  | (-0.08, | 0.005  | (0.11,  | (0.19,  | (-0.19, | 0.662  | (0.00,  | (0.00,  | —       | —      |
|                          | 1.93)   | 1.54)   | 0.03)   |        | 4.28)   | 3.69)   | -0.01)  |        | 1.60)   | 1.25)   | 0.30)   |        | 0.71)   | 0.46)   |         |        |
| Cote d'Ivoire            | 1.31    | 1.30    | -0.02   |        | 4.34    | 4.30    | -0.03   |        | 0.52    | 0.53    | 0.11    |        |         |         |         |        |
|                          | (0.82,  | (0.99,  | (-0.08, | 0.543  | (3.38,  | (3.72,  | (-0.05, | 0.005  | (0.23,  | (0.35,  | (-0.11, | 0.316  | —       | —       | —       | —      |
|                          | 2.00)   | 1.67)   | 0.04)   |        | 5.50)   | 4.95)   | -0.01)  |        | 1.01)   | 0.79)   | 0.33)   |        |         |         |         |        |
| Croatia                  | 1.15    | 1.07    | -0.28   | 0.010  | 3.82    | 3.54    | -0.28   | <0.001 | 0.64    | 0.54    | -0.60   | 0.007  | 0.01    | —       | —       | —      |

|                                             |                         |                         |                            |        |                         |                         |                            |        |                         |                         |                            |        |                         |                         |                          |        |
|---------------------------------------------|-------------------------|-------------------------|----------------------------|--------|-------------------------|-------------------------|----------------------------|--------|-------------------------|-------------------------|----------------------------|--------|-------------------------|-------------------------|--------------------------|--------|
|                                             | (0.59,<br>2.08)         | (0.47,<br>2.24)         | (-0.49,<br>-0.07)          |        | (2.72,<br>5.26)         | (2.36,<br>5.24)         | (-0.43,<br>-0.14)          |        | (0.24,<br>1.41)         | (0.15,<br>1.55)         | (-1.04,<br>-0.16)          |        | (0.00,<br>0.50)         |                         |                          |        |
|                                             | 0.71                    | 0.70                    | -0.02                      |        | 2.37                    | 2.33                    | -0.05                      |        | 0.78                    | 0.62                    | -0.72                      |        | 0.01                    | 0.01                    | 0.00                     |        |
| Cuba                                        | (0.39,<br>1.19)         | (0.38,<br>1.22)         | (-0.13,<br>0.10)           | 0.805  | (1.74,<br>3.15)         | (1.69,<br>3.16)         | (-0.13,<br>0.03)           | 0.251  | (0.44,<br>1.28)         | (0.32,<br>1.12)         | (-0.87,<br>-0.57)          | <0.001 | (0.00,<br>0.21)         | (0.00,<br>0.26)         | (0.00,<br>0.00)*         | <0.001 |
|                                             | 1.01                    | 0.91                    | -0.36                      |        | 3.34                    | 3.01                    | -0.36                      |        | 0.59                    | 0.49                    | -0.60                      |        | 0.01                    |                         |                          |        |
| Cyprus                                      | (0.08,<br>4.48)         | (0.19,<br>3.69)         | (-0.52,<br>-0.21)          | <0.001 | (1.10,<br>7.93)         | (1.46,<br>6.31)         | (-0.51,<br>-0.21)          | <0.001 | (0.01,<br>3.80)         | (0.04,<br>3.16)         | (-0.90,<br>-0.29)          | <0.001 | (0.00,<br>2.77)         | —                       | —                        | —      |
|                                             | 1.26                    | 1.23                    | -0.08                      |        | 4.17                    | 4.07                    | -0.08                      |        | 0.62                    | 0.56                    | -0.31                      |        |                         |                         |                          |        |
| Czechia                                     | (0.83,<br>1.86)         | (0.79,<br>1.89)         | (-0.17,<br>0.02)           | 0.102  | (3.36,<br>5.14)         | (3.23,<br>5.11)         | (-0.13,<br>-0.04)          | <0.001 | (0.33,<br>1.08)         | (0.28,<br>1.09)         | (-0.38,<br>-0.23)          | <0.001 | —                       | —                       | —                        | —      |
| Democratic<br>People's Republic<br>of Korea | 2.16<br>(1.70,<br>2.70) | 2.17<br>(1.78,<br>2.63) | 0.01<br>(-0.05,<br>0.07)   | 0.730  | 7.16<br>(6.31,<br>8.11) | 7.21<br>(6.48,<br>8.01) | 0.02<br>(-0.00,<br>0.05)   | 0.063  | 0.85<br>(0.57,<br>1.21) | 0.86<br>(0.62,<br>1.17) | 0.06<br>(0.00,<br>0.12)    | 0.037  | —                       | —                       | —                        | —      |
| Democratic<br>Republic of the<br>Congo      | 1.22<br>(0.95,<br>1.55) | 1.19<br>(1.01,<br>1.39) | -0.10<br>(-0.15,<br>-0.05) | <0.001 | 4.06<br>(3.54,<br>4.63) | 3.93<br>(3.60,<br>4.29) | -0.11<br>(-0.13,<br>-0.09) | <0.001 | 0.82<br>(0.60,<br>1.09) | 0.79<br>(0.65,<br>0.96) | -0.11<br>(-0.17,<br>-0.06) | <0.001 | 0.01<br>(0.00,<br>0.08) | 0.01<br>(0.00,<br>0.04) | 0.00<br>(0.00,<br>0.00)* | <0.001 |
|                                             | 1.00                    | 0.87                    | -0.48                      |        | 3.32                    | 2.89                    | -0.49                      |        | 0.53                    | 0.45                    | -0.57                      |        |                         |                         |                          |        |
| Denmark                                     | (0.48,<br>1.88)         | (0.37,<br>1.76)         | (-0.58,<br>-0.38)          | <0.001 | (2.29,<br>4.69)         | (1.89,<br>4.25)         | (-0.54,<br>-0.43)          | <0.001 | (0.18,<br>1.26)         | (0.13,<br>1.19)         | (-0.84,<br>-0.29)          | <0.001 | —                       | —                       | —                        | —      |
|                                             | 0.77                    | 0.78                    | 0.06                       |        | 2.55                    | 2.59                    | 0.05                       |        | 0.84                    | 0.73                    | -0.41                      |        | 0.01                    | 0.01                    | 0.00                     |        |
| Djibouti                                    | (0.00,<br>7.11)         | (0.10,<br>3.02)         | (-0.00,<br>0.13)           | 0.062  | (0.23,<br>10.18)        | (1.03,<br>5.56)         | (-0.03,<br>0.12)           | 0.222  | (0.00,<br>7.24)         | (0.09,<br>2.93)         | (-0.89,<br>0.07)           | 0.097  | (0.00,<br>5.64)         | (0.00,<br>1.79)         | (0.00,<br>0.00)*         | 0.006  |
|                                             | 0.73                    | 0.74                    | 0.03                       |        | 2.44                    | 2.44                    | -0.00                      |        | 0.84                    | 0.83                    | 0.01                       |        | 0.01                    | 0.01                    | 0.44                     |        |
| Dominica                                    | (0.00,<br>36.36)        | (0.00,<br>31.51)        | (-0.06,<br>0.12)           | 0.550  | (0.00,<br>39.76)        | (0.00,<br>34.89)        | (-0.07,<br>0.06)           | 0.905  | (0.00,<br>36.56)        | (0.00,<br>31.69)        | (-0.42,<br>0.44)           | 0.961  | (0.00,<br>34.88)        | (0.00,<br>30.02)        | (0.44,<br>0.44)          | <0.001 |
| Dominican<br>Republic                       | 0.71<br>(0.32,<br>1.37) | 0.73<br>(0.41,<br>1.20) | 0.09<br>(0.00,<br>0.18)    | 0.041  | 2.35<br>(1.56,<br>3.39) | 2.42<br>(1.80,<br>3.19) | 0.09<br>(0.05,<br>0.13)    | <0.001 | 0.66<br>(0.29,<br>1.29) | 0.75<br>(0.43,<br>1.23) | 0.47<br>(0.17,<br>0.77)    | 0.002  | (0.00,<br>0.33)         | (0.00,<br>0.20)         | (0.00,<br>0.00)*         | <0.001 |
|                                             | 0.18                    | 0.27                    | 1.42                       |        | 0.59                    | 0.91                    | 1.50                       |        | 0.89                    | 1.03                    | 0.32                       |        | 0.02                    | 0.02                    | 0.27                     |        |
| Ecuador                                     | (0.04,<br>0.52)         | (0.13,<br>0.51)         | (0.98,<br>1.86)            | <0.001 | (0.28,<br>1.09)         | (0.62,<br>1.29)         | (1.23,<br>1.77)            | <0.001 | (0.50,<br>1.48)         | (0.72,<br>1.44)         | (-0.09,<br>0.73)           | 0.131  | (0.00,<br>0.26)         | (0.00,<br>0.14)         | (-0.28,<br>0.81)         | 0.329  |
| Egypt                                       | 1.24                    | 1.27                    | 0.08                       | <0.001 | 4.12                    | 4.22                    | 0.08                       | <0.001 | 0.69                    | 0.74                    | 0.27                       | <0.001 | 0.01                    | 0.01                    | 0.00                     | 1.000  |

|                   |        |        |         |        |        |        |         |        |        |        |         |        |        |        |         |        |
|-------------------|--------|--------|---------|--------|--------|--------|---------|--------|--------|--------|---------|--------|--------|--------|---------|--------|
|                   | (1.02, | (1.12, | (0.08,  |        | (3.71, | (3.94, | (0.06,  |        | (0.53, | (0.63, | (0.25,  |        | (0.00, | (0.00, | (-0.00, |        |
|                   | 1.50)  | 1.44)  | 0.08)   |        | 4.56)  | 4.52)  | 0.11)   |        | 0.88)  | 0.87)  | 0.28)   |        | 0.05)  | 0.03)  | 0.00)   |        |
|                   | 0.73   | 0.74   | 0.04    |        | 2.41   | 2.46   | 0.07    |        | 0.42   | 0.42   | -0.02   |        |        |        |         |        |
| El Salvador       | (0.27, | (0.34, | (-0.06, | 0.437  | (1.46, | (1.67, | (0.01,  | 0.021  | (0.10, | (0.14, | (-0.12, | 0.774  | —      | —      | —       | —      |
|                   | 1.59)  | 1.40)  | 0.13)   |        | 3.75)  | 3.51)  | 0.12)   |        | 1.15)  | 0.97)  | 0.09)   |        |        |        |         |        |
|                   | 1.23   | 1.27   | 0.11    |        | 4.09   | 4.20   | 0.10    |        | 0.75   | 0.91   | 0.74    |        | 0.01   | 0.01   | 0.00    |        |
| Equatorial Guinea | (0.02, | (0.25, | (0.03,  | 0.005  | (0.80, | (1.95, | (0.07,  | <0.001 | (0.00, | (0.12, | (0.68,  | <0.001 | (0.00, | (0.00, | (0.00,  | <0.001 |
|                   | 7.76)  | 3.83)  | 0.19)   |        | 12.34) | 7.92)  | 0.14)   |        | 6.88)  | 3.27)  | 0.80)   |        | 5.45)  | 1.72)  | 0.00)*  |        |
|                   | 0.75   | 0.76   | 0.04    |        | 2.50   | 2.53   | 0.05    |        | 0.74   | 0.76   | 0.06    |        | 0.01   | 0.01   | 0.00    |        |
| Eritrea           | (0.18, | (0.34, | (-0.10, | 0.545  | (1.25, | (1.68, | (-0.02, | 0.179  | (0.17, | (0.34, | (-0.07, | 0.361  | (0.00, | (0.00, | (0.00,  | <0.001 |
|                   | 2.10)  | 1.48)  | 0.18)   |        | 4.47)  | 3.66)  | 0.11)   |        | 2.08)  | 1.47)  | 0.20)   |        | 0.86)  | 0.36)  | 0.00)*  |        |
|                   | 1.62   | 1.72   | 0.21    |        | 5.38   | 5.72   | 0.21    |        | 0.64   | 0.64   | -0.01   |        |        |        |         |        |
| Estonia           | (0.54, | (0.49, | (0.14,  | <0.001 | (3.16, | (3.14, | (0.19,  | <0.001 | (0.08, | (0.05, | (-0.34, | 0.937  | —      | —      | —       | —      |
|                   | 3.92)  | 5.06)  | 0.29)   |        | 8.72)  | 10.15) | 0.23)   |        | 2.53)  | 3.59)  | 0.32)   |        |        |        |         |        |
|                   | 1.27   | 1.26   | -0.03   |        | 4.20   | 4.16   | -0.03   |        | 0.93   | 0.92   | -0.06   |        | 0.01   | 0.01   | 0.00    |        |
| Eswatini          | (0.09, | (0.24, | (-0.13, | 0.614  | (1.32, | (1.92, | (-0.05, | 0.025  | (0.03, | (0.12, | (-0.29, | 0.642  | (0.00, | (0.00, | (0.00,  | <0.001 |
|                   | 5.56)  | 3.82)  | 0.07)   |        | 10.00) | 7.87)  | -0.00)  |        | 5.01)  | 3.31)  | 0.18)   |        | 3.32)  | 1.73)  | 0.00)*  |        |
|                   | 0.79   | 0.80   | 0.05    |        | 2.62   | 2.67   | 0.07    |        | 0.76   | 0.72   | -0.18   |        | 0.01   | 0.01   | 0.00    |        |
| Ethiopia          | (0.60, | (0.68, | (-0.03, | 0.211  | (2.27, | (2.43, | (0.02,  | 0.004  | (0.58, | (0.60, | (-0.32, | 0.007  | (0.00, | (0.00, | (0.00,  | 0.007  |
|                   | 1.02)  | 0.95)  | 0.12)   |        | 3.01)  | 2.92)  | 0.11)   |        | 0.99)  | 0.85)  | -0.05)  |        | 0.07)  | 0.04)  | 0.00)*  |        |
|                   | 2.21   | 2.28   | 0.09    |        | 7.35   | 7.55   | 0.09    |        | 7.84   | 9.73   | 0.75    |        | 0.14   | 0.17   | 0.70    |        |
| Fiji              | (0.47, | (0.64, | (0.05,  | <0.001 | (3.52, | (4.10, | (0.07,  | <0.001 | (3.88, | (5.73, | (0.42,  | <0.001 | (0.00, | (0.00, | (0.21,  | 0.006  |
|                   | 6.47)  | 5.83)  | 0.13)   |        | 13.54) | 12.79) | 0.11)   |        | 14.15) | 15.51) | 1.07)   |        | 3.03)  | 2.50)  | 1.20)   |        |
|                   | 1.07   | 0.91   | -0.53   |        | 3.54   | 3.03   | -0.53   |        | 0.52   | 0.46   | -0.43   |        |        |        |         |        |
| Finland           | (0.54, | (0.41, | (-0.62, | <0.001 | (2.51, | (2.03, | (-0.57, | <0.001 | (0.18, | (0.13, | (-0.55, | <0.001 | —      | —      | —       | —      |
|                   | 1.99)  | 1.84)  | -0.44)  |        | 4.93)  | 4.43)  | -0.49)  |        | 1.28)  | 1.23)  | -0.31)  |        |        |        |         |        |
|                   | 1.08   | 0.92   | -0.57   |        | 3.59   | 3.06   | -0.56   |        | 0.57   | 0.50   | -0.48   |        |        |        |         |        |
| France            | (0.90, | (0.75, | (-0.63, | <0.001 | (3.26, | (2.75, | (-0.59, | <0.001 | (0.44, | (0.38, | (-0.62, | <0.001 | —      | —      | —       | —      |
|                   | 1.29)  | 1.12)  | -0.50)  |        | 3.95)  | 3.40)  | -0.53)  |        | 0.72)  | 0.65)  | -0.34)  |        |        |        |         |        |
|                   | 1.26   | 1.26   | 0.03    |        | 4.18   | 4.17   | -0.01   |        | 0.93   | 0.89   | -0.16   |        | 0.01   | 0.01   | 0.00    |        |
| Gabon             | (0.12, | (0.36, | (-0.09, | 0.671  | (1.49, | (2.28, | (-0.07, | 0.753  | (0.05, | (0.19, | (-0.53, | 0.389  | (0.00, | (0.00, | (0.00,  | 0.019  |
|                   | 4.99)  | 3.15)  | 0.15)   |        | 9.31)  | 7.01)  | 0.05)   |        | 4.44)  | 2.60)  | 0.21)   |        | 2.77)  | 1.13)  | 0.00)*  |        |
| Gambia            | 1.29   | 1.29   | -0.01   | 0.836  | 4.29   | 4.28   | -0.01   | 0.536  | 0.49   | 0.55   | 0.42    | <0.001 | —      | —      | —       | —      |

|               |                  |                  |                   |        |                  |                  |                   |        |                  |                  |                   |        |                  |                  |                  |
|---------------|------------------|------------------|-------------------|--------|------------------|------------------|-------------------|--------|------------------|------------------|-------------------|--------|------------------|------------------|------------------|
|               | (0.13,<br>5.08)  | (0.41,<br>3.06)  | (-0.06,<br>0.05)  |        | (1.54,<br>9.51)  | (2.44,<br>6.97)  | (-0.04,<br>0.02)  |        | (0.00,<br>3.75)  | (0.07,<br>1.97)  | (0.31,<br>0.52)   |        |                  |                  |                  |
|               | 1.47             | 1.52             | 0.11              |        | 4.87             | 5.04             | 0.12              |        | 0.62             | 0.64             | 0.08              |        |                  |                  |                  |
| Georgia       | (0.85,<br>2.40)  | (0.75,<br>2.92)  | (0.05,<br>0.17)   | <0.001 | (3.66,<br>6.38)  | (3.52,<br>7.13)  | (0.05,<br>0.19)   | 0.001  | (0.25,<br>1.32)  | (0.19,<br>1.77)  | (-0.06,<br>0.22)  | 0.289  | —                | —                | —                |
|               | 1.12             | 0.95             | -0.54             |        | 3.71             | 3.14             | -0.54             |        | 1.03             | 0.93             | -0.36             |        | 0.01             | 0.01             | 0.00             |
| Germany       | (0.96,<br>1.30)  | (0.80,<br>1.12)  | (-0.67,<br>-0.41) | <0.001 | (3.42,<br>4.03)  | (2.86,<br>3.45)  | (-0.59,<br>-0.50) | <0.001 | (0.88,<br>1.21)  | (0.78,<br>1.11)  | (-0.50,<br>-0.21) | <0.001 | (0.00,<br>0.06)  | (0.00,<br>0.06)  | (0.00,<br>0.00)* |
|               | 1.32             | 1.33             | 0.02              |        | 4.37             | 4.43             | 0.03              |        | 0.57             | 0.63             | 0.38              |        |                  |                  |                  |
| Ghana         | (0.89,<br>1.88)  | (1.06,<br>1.66)  | (-0.02,<br>0.05)  | 0.368  | (3.56,<br>5.32)  | (3.92,<br>4.99)  | (0.00,<br>0.06)   | 0.028  | (0.31,<br>0.97)  | (0.45,<br>0.86)  | (0.29,<br>0.47)   | <0.001 | —                | —                | —                |
|               | 1.00             | 0.85             | -0.52             |        | 3.31             | 2.84             | -0.53             |        | 1.22             | 1.16             | -0.18             |        | 0.02             | 0.02             | 0.00             |
| Greece        | (0.60,<br>1.56)  | (0.49,<br>1.44)  | (-0.60,<br>-0.45) | <0.001 | (2.55,<br>4.23)  | (2.15,<br>3.73)  | (-0.57,<br>-0.48) | <0.001 | (0.78,<br>1.83)  | (0.72,<br>1.82)  | (-0.38,<br>0.01)  | 0.064  | (0.00,<br>0.24)  | (0.00,<br>0.35)  | (0.00,<br>0.00)* |
|               | 2.86             | 2.78             | -0.10             |        | 9.50             | 9.22             | -0.10             |        | 1.05             | 0.99             | -0.14             |        |                  |                  |                  |
| Greenland     | (0.00,<br>51.57) | (0.00,<br>49.72) | (-0.14,<br>-0.05) | <0.001 | (0.24,<br>62.29) | (0.20,<br>60.45) | (-0.11,<br>-0.09) | <0.001 | (0.00,<br>48.59) | (0.00,<br>46.61) | (-0.19,<br>-0.09) | <0.001 | —                | —                | —                |
|               | 0.72             | 0.74             | 0.05              |        | 2.38             | 2.45             | 0.09              |        | 0.85             | 0.83             | -0.05             |        | 0.01             | 0.01             | 0.46             |
| Grenada       | (0.00,<br>29.54) | (0.00,<br>23.60) | (-0.05,<br>0.15)  | 0.316  | (0.00,<br>32.83) | (0.00,<br>26.94) | (0.04,<br>0.15)   | 0.001  | (0.00,<br>29.79) | (0.00,<br>23.77) | (-0.38,<br>0.27)  | 0.747  | (0.00,<br>28.12) | (0.00,<br>22.13) | (0.46,<br>0.46)  |
|               | 2.14             | 2.27             | 0.19              |        | 7.11             | 7.53             | 0.19              |        | 6.58             | 7.70             | 0.42              |        | 0.11             | 0.13             | 0.61             |
| Guam          | (0.01,<br>18.03) | (0.01,<br>18.50) | (0.12,<br>0.26)   | <0.001 | (0.80,<br>26.46) | (0.94,<br>27.28) | (0.15,<br>0.22)   | <0.001 | (0.66,<br>25.55) | (0.98,<br>27.56) | (-0.86,<br>1.70)  | 0.523  | (0.00,<br>14.13) | (0.00,<br>14.42) | (-0.82,<br>2.06) |
|               | 0.73             | 0.74             | 0.04              |        | 2.42             | 2.44             | 0.04              |        | 0.72             | 0.56             | -1.10             |        | 0.01             | 0.01             | 0.00             |
| Guatemala     | (0.33,<br>1.40)  | (0.48,<br>1.08)  | (-0.17,<br>0.24)  | 0.739  | (1.62,<br>3.48)  | (1.95,<br>3.01)  | (-0.03,<br>0.11)  | 0.234  | (0.32,<br>1.38)  | (0.34,<br>0.87)  | (-1.39,<br>-0.82) | <0.001 | (0.00,<br>0.33)  | (0.00,<br>0.12)  | (0.00,<br>0.00)* |
|               | 1.21             | 1.22             | 0.04              |        | 4.01             | 4.06             | 0.04              |        | 0.50             | 0.54             | 0.27              |        |                  |                  |                  |
| Guinea        | (0.62,<br>2.13)  | (0.80,<br>1.80)  | (-0.03,<br>0.10)  | 0.266  | (2.85,<br>5.50)  | (3.23,<br>5.04)  | (-0.01,<br>0.10)  | 0.123  | (0.16,<br>1.19)  | (0.27,<br>0.96)  | (0.18,<br>0.36)   | <0.001 | —                | —                | —                |
|               | 1.28             | 1.27             | -0.02             |        | 4.24             | 4.20             | -0.03             |        | 0.52             | 0.56             | 0.27              |        |                  |                  |                  |
| Guinea-Bissau | (0.16,<br>4.64)  | (0.37,<br>3.15)  | (-0.12,<br>0.07)  | 0.654  | (1.64,<br>8.94)  | (2.31,<br>7.04)  | (-0.06,<br>-0.00) | 0.028  | (0.01,<br>3.40)  | (0.06,<br>2.10)  | (0.05,<br>0.48)   | 0.014  | —                | —                | —                |
|               | 0.73             | 0.73             | 0.01              | 0.937  | 2.43             | 2.42             | -0.02             | 0.541  | 1.11             | 1.39             | 0.83              | 0.015  | 0.02             | 0.02             | 0.00             |
| Guyana        |                  |                  |                   |        |                  |                  |                   |        |                  |                  |                   |        |                  |                  | 0.069            |

|                            |              |              |                |        |               |               |                |        |              |              |                |        |              |              |               |        |
|----------------------------|--------------|--------------|----------------|--------|---------------|---------------|----------------|--------|--------------|--------------|----------------|--------|--------------|--------------|---------------|--------|
|                            | (0.02, 4.18) | (0.02, 4.02) | (-0.15, 0.16)  |        | (0.54, 6.88)  | (0.56, 6.69)  | (-0.09, 0.05)  |        | (0.08, 4.80) | (0.16, 5.11) | (0.16, 1.50)   |        | (0.00, 2.85) | (0.00, 2.70) | (0.00, 0.00)  |        |
|                            | 0.70         | 0.70         | -0.02          |        | 2.32          | 2.32          | -0.02          |        | 0.93         | 0.89         | -0.15          |        | 0.01         | 0.01         | 0.00          |        |
| Haiti                      | (0.29, 1.40) | (0.42, 1.09) | (-0.14, 0.10)  | 0.788  | (1.50, 3.42)  | (1.78, 2.97)  | (-0.07, 0.03)  | 0.497  | (0.45, 1.70) | (0.57, 1.32) | (-0.47, 0.17)  | 0.350  | (0.00, 0.37) | (0.00, 0.16) | (0.00, 0.00)* | 0.004  |
|                            | 0.73         | 0.74         | 0.04           |        | 2.43          | 2.44          | 0.02           |        | 0.57         | 0.46         | -0.76          |        | 0.01         |              |               |        |
| Honduras                   | (0.24, 1.72) | (0.40, 1.24) | (0.04, 0.04)   | <0.001 | (1.40, 3.92)  | (1.78, 3.27)  | (-0.02, 0.05)  | 0.336  | (0.15, 1.49) | (0.20, 0.89) | (-0.94, -0.58) | <0.001 | (0.00, 0.57) | —            | —             | —      |
|                            | 1.28         | 1.23         | -0.16          |        | 4.26          | 4.08          | -0.17          |        | 0.69         | 0.62         | -0.34          |        | 0.01         |              |               |        |
| Hungary                    | (0.86, 1.87) | (0.76, 1.93) | (-0.24, -0.08) | <0.001 | (3.46, 5.21)  | (3.19, 5.18)  | (-0.21, -0.12) | <0.001 | (0.39, 1.16) | (0.31, 1.18) | (-0.52, -0.16) | <0.001 | (0.00, 0.25) | —            | —             | —      |
|                            | 0.99         | 0.89         | -0.37          |        | 3.29          | 2.96          | -0.38          |        | 0.76         | 0.61         | -0.73          |        | 0.01         | 0.01         | 0.00          |        |
| Iceland                    | (0.00, 9.73) | (0.00, 9.08) | (-0.52, -0.22) | <0.001 | (0.29, 13.62) | (0.33, 12.31) | (-0.42, -0.33) | <0.001 | (0.00, 9.31) | (0.00, 8.61) | (-0.94, -0.51) | <0.001 | (0.00, 7.89) | (0.00, 7.58) | (0.00, 0.00)* | <0.001 |
|                            | 2.07         | 2.14         | 0.12           |        | 6.86          | 7.11          | 0.13           |        | 0.74         | 0.82         | 0.32           |        |              |              |               |        |
| India                      | (1.99, 2.14) | (2.09, 2.20) | (0.04, 0.19)   | 0.002  | (6.72, 7.00)  | (7.01, 7.21)  | (0.04, 0.23)   | 0.005  | (0.69, 0.78) | (0.79, 0.85) | (0.27, 0.37)   | <0.001 | —            | —            | —             | —      |
|                            | 2.32         | 2.37         | 0.07           |        | 7.70          | 7.87          | 0.07           |        | 0.98         | 1.05         | 0.20           |        | 0.01         | 0.01         | 0.00          |        |
| Indonesia                  | (2.16, 2.49) | (2.24, 2.50) | (0.00, 0.13)   | 0.036  | (7.39, 8.01)  | (7.64, 8.10)  | (0.04, 0.09)   | <0.001 | (0.88, 1.10) | (0.96, 1.14) | (0.15, 0.25)   | <0.001 | (0.00, 0.02) | (0.00, 0.02) | (0.00, 0.00)* | <0.001 |
|                            | 1.39         | 1.38         | -0.10          |        | 4.62          | 4.60          | -0.09          |        | 0.61         | 0.65         | 0.15           |        |              |              |               |        |
| Iran (Islamic Republic of) | (1.15, 1.67) | (1.24, 1.55) | (-0.21, 0.02)  | 0.105  | (4.16, 5.12)  | (4.32, 4.89)  | (-0.18, -0.01) | 0.032  | (0.45, 0.81) | (0.55, 0.76) | (-0.03, 0.33)  | 0.101  | —            | —            | —             | —      |
|                            | 1.32         | 1.30         | -0.06          |        | 4.37          | 4.32          | -0.04          |        | 2.79         | 3.44         | 0.84           |        | 0.04         | 0.06         | 1.68          |        |
| Iraq                       | (0.90, 1.86) | (1.05, 1.59) | (-0.13, 0.02)  | 0.161  | (3.57, 5.29)  | (3.85, 4.83)  | (-0.07, -0.01) | 0.003  | (2.17, 3.52) | (3.03, 3.88) | (0.55, 1.14)   | <0.001 | (0.00, 0.24) | (0.02, 0.14) | (1.23, 2.14)  | <0.001 |
|                            | 1.06         | 0.94         | -0.41          |        | 3.51          | 3.12          | -0.41          |        | 0.64         | 0.49         | -0.91          |        | 0.01         |              |               |        |
| Ireland                    | (0.43, 2.18) | (0.45, 1.83) | (-0.41, -0.41) | <0.001 | (2.24, 5.25)  | (2.16, 4.44)  | (-0.45, -0.38) | <0.001 | (0.18, 1.60) | (0.16, 1.24) | (-1.22, -0.60) | <0.001 | (0.00, 0.58) | —            | —             | —      |
|                            | 1.00         | 0.89         | -0.43          |        | 3.32          | 2.95          | -0.41          |        | 0.68         | 0.50         | -1.08          |        | 0.01         |              |               |        |
| Israel                     | (0.47, 1.87) | (0.50, 1.48) | (-0.49, -0.37) | <0.001 | (2.28, 4.68)  | (2.19, 3.90)  | (-0.45, -0.38) | <0.001 | (0.26, 1.45) | (0.22, 0.99) | (-1.25, -0.90) | <0.001 | (0.00, 0.43) | —            | —             | —      |
|                            | 1.27         | 1.02         | -0.73          | <0.001 | 4.20          | 3.40          | -0.71          | <0.001 | 0.75         | 0.59         | -0.83          | <0.001 | 0.01         | 0.01         | 0.00          | <0.001 |

|                                        |                  |                  |                   |        |                  |                  |                   |        |                  |                  |                   |        |                  |                  |                  |
|----------------------------------------|------------------|------------------|-------------------|--------|------------------|------------------|-------------------|--------|------------------|------------------|-------------------|--------|------------------|------------------|------------------|
|                                        | (1.06,<br>1.50)  | (0.83,<br>1.25)  | (-0.81,<br>-0.65) |        | (3.82,<br>4.61)  | (3.05,<br>3.79)  | (-0.81,<br>-0.62) |        | (0.59,<br>0.94)  | (0.44,<br>0.77)  | (-0.96,<br>-0.69) |        | (0.00,<br>0.05)  | (0.00,<br>0.07)  | (0.00,<br>0.00)* |
|                                        | 0.71             | 0.74             | 0.14              |        | 2.34             | 2.46             | 0.17              |        | 0.58             | 0.71             | 1.02              |        | 0.01             | 0.01             | 0.00             |
| Jamaica                                | (0.13,<br>2.20)  | (0.22,<br>1.86)  | (0.02,<br>0.26)   | 0.026  | (1.06,<br>4.49)  | (1.35,<br>4.13)  | (0.14,<br>0.19)   | <0.001 | (0.08,<br>2.01)  | (0.20,<br>1.82)  | (0.46,<br>1.59)   | <0.001 | (0.00,<br>1.02)  | (0.00,<br>0.69)  | (0.00,<br>0.00)* |
|                                        | 0.93             | 0.69             | -1.10             |        | 3.10             | 2.30             | -1.08             |        | 0.62             | 0.49             | -0.79             |        | 0.01             | 0.01             | 0.00             |
| Japan                                  | (0.81,<br>1.06)  | (0.58,<br>0.82)  | (-1.33,<br>-0.87) | <0.001 | (2.88,<br>3.32)  | (2.10,<br>2.52)  | (-1.24,<br>-0.92) | <0.001 | (0.52,<br>0.73)  | (0.40,<br>0.61)  | (-1.05,<br>-0.54) | <0.001 | (0.00,<br>0.03)  | (0.00,<br>0.04)  | (0.00,<br>0.00)* |
|                                        | 1.24             | 1.26             | 0.05              |        | 4.12             | 4.17             | 0.04              |        | 0.62             | 0.64             | 0.12              |        |                  |                  |                  |
| Jordan                                 | (0.44,<br>2.76)  | (0.82,<br>1.85)  | (-0.04,<br>0.14)  | 0.298  | (2.47,<br>6.45)  | (3.34,<br>5.16)  | (0.01,<br>0.07)   | 0.013  | (0.12,<br>1.86)  | (0.34,<br>1.10)  | (-0.11,<br>0.35)  | 0.292  | —                | —                | —                |
|                                        | 1.49             | 1.52             | 0.06              |        | 4.95             | 5.05             | 0.07              |        | 1.03             | 1.09             | 0.17              |        | 0.01             | 0.01             | 0.00             |
| Kazakhstan                             | (1.11,<br>1.97)  | (1.16,<br>1.98)  | (-0.02,<br>0.14)  | 0.152  | (4.22,<br>5.77)  | (4.36,<br>5.83)  | (0.05,<br>0.09)   | <0.001 | (0.72,<br>1.44)  | (0.79,<br>1.49)  | (0.04,<br>0.30)   | 0.012  | (0.00,<br>0.14)  | (0.00,<br>0.16)  | (0.00,<br>0.00)* |
|                                        | 0.82             | 0.81             | -0.04             |        | 2.72             | 2.69             | -0.02             |        | 0.74             | 0.78             | 0.18              |        | 0.01             | 0.01             | 0.00             |
| Kenya                                  | (0.53,<br>1.23)  | (0.63,<br>1.02)  | (-0.15,<br>0.06)  | 0.419  | (2.15,<br>3.41)  | (2.36,<br>3.05)  | (-0.13,<br>0.08)  | 0.685  | (0.46,<br>1.12)  | (0.61,<br>0.99)  | (0.02,<br>0.35)   | 0.031  | (0.00,<br>0.15)  | (0.00,<br>0.06)  | (-0.00,<br>0.00) |
|                                        | 2.15             | 2.20             | 0.07              |        | 7.13             | 7.28             | 0.07              |        | 13.59            | 15.18            | 0.34              |        | 0.25             | 0.28             | 0.41             |
| Kiribati                               | (0.00,<br>33.77) | (0.00,<br>20.42) | (0.01,<br>0.14)   | 0.021  | (0.13,<br>42.93) | (0.65,<br>29.20) | (0.05,<br>0.09)   | <0.001 | (1.32,<br>53.57) | (3.67,<br>41.30) | (0.19,<br>0.50)   | <0.001 | (0.00,<br>30.01) | (0.00,<br>16.69) | (-0.03,<br>0.85) |
|                                        | 1.27             | 1.30             | 0.08              |        | 4.21             | 4.31             | 0.07              |        | 0.60             | 0.60             | 0.10              |        |                  |                  |                  |
| Kuwait                                 | (0.36,<br>3.23)  | (0.78,<br>2.27)  | (0.03,<br>0.12)   | 0.001  | (2.28,<br>7.15)  | (3.30,<br>5.71)  | (0.06,<br>0.09)   | <0.001 | (0.07,<br>2.23)  | (0.27,<br>1.43)  | (-0.12,<br>0.33)  | 0.367  | —                | —                | —                |
|                                        | 1.42             | 1.44             | 0.05              |        | 4.72             | 4.77             | 0.04              |        | 0.60             | 0.64             | 0.24              |        |                  |                  |                  |
| Kyrgyzstan                             | (0.71,<br>2.56)  | (0.85,<br>2.29)  | (-0.01,<br>0.11)  | 0.131  | (3.30,<br>6.55)  | (3.62,<br>6.17)  | (0.01,<br>0.06)   | 0.005  | (0.18,<br>1.45)  | (0.28,<br>1.28)  | (0.15,<br>0.32)   | <0.001 | —                | —                | —                |
|                                        | 2.18             | 2.21             | 0.05              |        | 7.24             | 7.34             | 0.04              |        | 0.77             | 1.02             | 1.00              |        |                  | 0.01             |                  |
| Lao People's<br>Democratic<br>Republic | (1.18,<br>3.70)  | (1.50,<br>3.14)  | (-0.01,<br>0.10)  | 0.101  | (5.26,<br>9.71)  | (5.98,<br>8.92)  | (0.02,<br>0.06)   | <0.001 | (0.24,<br>1.84)  | (0.56,<br>1.70)  | (0.93,<br>1.08)   | <0.001 | —                | (0.00,<br>0.29)  | —                |
|                                        | 1.60             | 1.66             | 0.14              |        | 5.30             | 5.52             | 0.15              |        | 0.61             | 0.63             | 0.12              |        |                  |                  |                  |
| Latvia                                 | (0.70,<br>3.21)  | (0.60,<br>4.15)  | (0.05,<br>0.23)   | 0.002  | (3.51,<br>7.77)  | (3.34,<br>8.97)  | (0.10,<br>0.20)   | <0.001 | (0.13,<br>1.86)  | (0.09,<br>2.76)  | (-0.03,<br>0.28)  | 0.125  | —                | —                | —                |
|                                        | 1.26             | 1.30             | 0.10              | 0.206  | 4.17             | 4.31             | 0.10              | 0.002  | 0.71             | 0.65             | -0.32             | <0.001 | 0.01             | —                | —                |
| Lebanon                                |                  |                  |                   |        |                  |                  |                   |        |                  |                  |                   |        |                  |                  |                  |

|            |               |              |                |        |               |               |                |        |               |              |                |              |               |              |                |        |
|------------|---------------|--------------|----------------|--------|---------------|---------------|----------------|--------|---------------|--------------|----------------|--------------|---------------|--------------|----------------|--------|
|            | (0.49, 2.64)  | (0.74, 2.21) | (-0.06, 0.26)  |        | (2.61, 6.30)  | (3.21, 5.74)  | (0.04, 0.17)   |        | (0.18, 1.87)  | (0.28, 1.40) | (-0.44, -0.19) | (0.00, 0.71) |               |              |                |        |
|            | 1.24          | 1.23         | -0.03          |        | 4.12          | 4.09          | -0.02          |        | 0.78          | 0.87         | 0.37           | 0.01         | 0.01          | 0.00         |                |        |
| Lesotho    | (0.28, 3.52)  | (0.40, 2.87) | (-0.09, 0.03)  | 0.320  | (2.02, 7.46)  | (2.36, 6.58)  | (-0.04, 0.00)  | 0.050  | (0.10, 2.83)  | (0.21, 2.35) | (0.17, 0.58)   | <0.001       | (0.00, 1.48)  | (0.00, 0.93) | (0.00, 0.00)*  | 0.001  |
|            | 1.35          | 1.31         | -0.10          |        | 4.47          | 4.35          | -0.09          |        | 0.52          | 0.54         | 0.16           |              |               |              |                |        |
| Liberia    | (0.39, 3.34)  | (0.66, 2.33) | (-0.17, -0.03) | 0.004  | (2.46, 7.46)  | (3.07, 5.99)  | (-0.13, -0.06) | <0.001 | (0.04, 2.08)  | (0.17, 1.31) | (0.05, 0.26)   | 0.003        | —             | —            | —              | —      |
|            | 1.28          | 1.28         | -0.01          |        | 4.25          | 4.26          | -0.00          |        | 0.62          | 0.62         | -0.04          |              |               |              |                |        |
| Libya      | (0.49, 2.72)  | (0.79, 1.99) | (-0.08, 0.06)  | 0.878  | (2.64, 6.49)  | (3.32, 5.40)  | (-0.04, 0.03)  | 0.894  | (0.14, 1.79)  | (0.30, 1.17) | (-0.14, 0.07)  | 0.501        | —             | —            | —              | —      |
|            | 1.63          | 1.76         | 0.26           |        | 5.41          | 5.85          | 0.26           |        | 0.63          | 0.69         | 0.25           |              |               |              |                |        |
| Lithuania  | (0.83, 2.91)  | (0.76, 3.67) | (0.18, 0.34)   | <0.001 | (3.83, 7.45)  | (3.85, 8.68)  | (0.23, 0.30)   | <0.001 | (0.19, 1.59)  | (0.15, 2.23) | (0.18, 0.32)   | <0.001       | —             | —            | —              | —      |
|            | 1.11          | 1.00         | -0.32          |        | 3.68          | 3.33          | -0.31          |        | 0.78          | 0.62         | -0.77          |              | 0.01          | 0.01         | 0.00           |        |
| Luxembourg | (0.02, 9.13)  | (0.05, 6.36) | (-0.47, -0.17) | <0.001 | (0.77, 12.76) | (0.98, 9.53)  | (-0.43, -0.19) | <0.001 | (0.00, 8.64)  | (0.01, 5.82) | (-1.08, -0.46) | <0.001       | (0.00, 7.53)  | (0.00, 4.96) | (0.00, 0.00)*  | <0.001 |
|            | 0.78          | 0.77         | -0.05          |        | 2.58          | 2.57          | -0.02          |        | 1.81          | 1.46         | -0.77          |              | 0.03          | 0.02         | -1.34          |        |
| Madagascar | (0.42, 1.33)  | (0.54, 1.08) | (-0.17, 0.06)  | 0.367  | (1.87, 3.48)  | (2.11, 3.09)  | (-0.05, 0.02)  | 0.413  | (1.24, 2.56)  | (1.12, 1.86) | (-1.08, -0.47) | <0.001       | (0.00, 0.28)  | (0.00, 0.13) | (-1.34, -1.34) | <0.001 |
|            | 0.81          | 0.81         | 0.02           |        | 2.67          | 2.68          | 0.02           |        | 0.76          | 0.74         | -0.08          |              | 0.01          | 0.01         | 0.00           |        |
| Malawi     | (0.40, 1.45)  | (0.52, 1.20) | (-0.10, 0.13)  | 0.763  | (1.87, 3.71)  | (2.12, 3.33)  | (-0.03, 0.08)  | 0.418  | (0.37, 1.39)  | (0.47, 1.11) | (-0.32, 0.16)  | 0.512        | (0.00, 0.30)  | (0.00, 0.14) | (0.00, 0.00)*  | 0.005  |
|            | 2.24          | 2.27         | 0.04           |        | 7.42          | 7.53          | 0.04           |        | 1.17          | 1.32         | 0.39           |              | 0.01          | 0.01         | -0.77          |        |
| Malaysia   | (1.75, 2.81)  | (1.91, 2.67) | (-0.04, 0.13)  | 0.323  | (6.51, 8.42)  | (6.87, 8.24)  | (-0.03, 0.11)  | 0.252  | (0.83, 1.61)  | (1.05, 1.64) | (0.20, 0.58)   | <0.001       | (0.00, 0.14)  | (0.00, 0.08) | (-5.29, 3.97)  | 0.746  |
|            | 2.12          | 2.17         | 0.07           |        | 7.05          | 7.21          | 0.06           |        | 0.91          | 0.88         | -0.17          |              | 0.01          | 0.01         | 0.00           |        |
| Maldives   | (0.00, 19.48) | (0.31, 8.94) | (0.03, 0.11)   | <0.001 | (0.67, 27.94) | (2.99, 15.77) | (0.03, 0.10)   | <0.001 | (0.00, 17.26) | (0.02, 7.09) | (-0.29, -0.05) | 0.005        | (0.00, 15.49) | (0.00, 5.80) | (0.00, 0.00)*  | <0.001 |
|            | 1.23          | 1.25         | 0.05           |        | 4.08          | 4.15          | 0.04           |        | 0.58          | 0.63         | 0.24           |              |               |              |                |        |
| Mali       | (0.70, 2.02)  | (0.89, 1.72) | (-0.11, 0.22)  | 0.538  | (3.04, 5.37)  | (3.46, 4.95)  | (-0.10, 0.19)  | 0.560  | (0.24, 1.18)  | (0.38, 0.98) | (0.12, 0.37)   | <0.001       | —             | —            | —              | —      |
|            | 1.05          | 0.93         | -0.42          | <0.001 | 3.48          | 3.08          | -0.42          | <0.001 | 0.67          | 0.64         | -0.14          | 0.257        | 0.01          | 0.01         | 0.00           | 0.015  |



|                                  |                |               |                |        |                |               |                |        |                |               |                |              |                |               |               |        |
|----------------------------------|----------------|---------------|----------------|--------|----------------|---------------|----------------|--------|----------------|---------------|----------------|--------------|----------------|---------------|---------------|--------|
|                                  | (0.01, 8.17)   | (0.01, 9.28)  | (-0.64, -0.20) |        | (0.65, 11.79)  | (0.54, 12.23) | (-0.54, -0.29) |        | (0.00, 7.57)   | (0.00, 8.88)  | (-0.39, 0.10)  | (0.00, 6.51) | (0.00, 7.99)   | (0.00, 0.00)* |               |        |
|                                  | 2.08           | 2.15          | 0.10           |        | 6.90           | 7.13          | 0.11           |        | 9.37           | 13.10         | 1.17           | 0.17         | 0.24           | 1.24          |               |        |
| Marshall Islands                 | (0.00, 61.04)  | (0.00, 37.71) | (0.05, 0.15)   | <0.001 | (0.00, 70.40)  | (0.09, 46.76) | (0.08, 0.13)   | <0.001 | (0.03, 74.86)  | (0.95, 56.84) | (1.07, 1.27)   | <0.001       | (0.00, 57.18)  | (0.00, 33.95) | (1.03, 1.44)  | <0.001 |
|                                  | 1.28           | 1.29          | 0.03           |        | 4.24           | 4.27          | 0.02           |        | 0.49           | 0.54          | 0.33           |              |                |               |               |        |
| Mauritania                       | (0.35, 3.27)   | (0.57, 2.50)  | (-0.03, 0.09)  | 0.352  | (2.27, 7.22)   | (2.83, 6.19)  | (0.00, 0.05)   | 0.027  | (0.04, 2.08)   | (0.13, 1.46)  | (0.23, 0.44)   | <0.001       | —              | —             | —             | —      |
|                                  | 2.20           | 2.24          | 0.04           |        | 7.30           | 7.45          | 0.05           |        | 0.83           | 0.86          | 0.04           |              |                |               |               |        |
| Mauritius                        | (0.73, 5.09)   | (0.79, 5.15)  | (-0.05, 0.14)  | 0.378  | (4.26, 11.71)  | (4.49, 11.75) | (-0.05, 0.14)  | 0.321  | (0.10, 3.08)   | (0.12, 3.16)  | (-0.15, 0.22)  | 0.686        | —              | —             | —             | —      |
|                                  | 0.90           | 0.88          | -0.09          |        | 2.99           | 2.92          | -0.08          |        | 0.98           | 0.84          | -0.44          |              | 0.01           | 0.01          | 0.00          |        |
| Mexico                           | (0.75, 1.07)   | (0.77, 1.00)  | (-0.24, 0.06)  | 0.239  | (2.71, 3.29)   | (2.72, 3.14)  | (-0.14, -0.02) | 0.012  | (0.83, 1.16)   | (0.73, 0.96)  | (-0.61, -0.27) | <0.001       | (0.00, 0.05)   | (0.00, 0.03)  | (0.00, 0.00)* | <0.001 |
| Micronesia (Federated States of) | 2.12           | 2.14          | 0.03           |        | 7.03           | 7.09          | 0.02           |        | 8.78           | 11.64         | 1.00           |              | 0.16           | 0.21          | 1.06          |        |
|                                  | (0.00, 28.64)  | (0.00, 26.03) | (-0.04, 0.11)  | 0.408  | (0.22, 37.52)  | (0.31, 34.90) | (-0.04, 0.08)  | 0.439  | (0.51, 40.38)  | (1.40, 42.28) | (0.87, 1.12)   | <0.001       | (0.00, 24.79)  | (0.00, 22.23) | (0.39, 1.74)  | 0.002  |
|                                  | 1.05           | 0.91          | -0.49          |        | 3.49           | 3.03          | -0.49          |        | 0.70           | 0.60          | -0.50          |              | 0.01           | 0.01          | 0.00          |        |
| Monaco                           | (0.00, 127.35) | (0.00, 92.61) | (-0.64, -0.35) | <0.001 | (0.00, 130.64) | (0.00, 95.89) | (-0.53, -0.45) | <0.001 | (0.00, 126.86) | (0.00, 92.11) | (-0.61, -0.40) | <0.001       | (0.00, 125.93) | (0.00, 91.14) | (0.00, 0.00)* | 0.006  |
|                                  | 1.44           | 1.50          | 0.12           |        | 4.77           | 4.97          | 0.14           |        | 0.67           | 0.69          | 0.04           |              |                |               |               |        |
| Mongolia                         | (0.42, 3.58)   | (0.76, 2.78)  | (0.08, 0.16)   | <0.001 | (2.61, 8.00)   | (3.52, 6.92)  | (0.11, 0.17)   | <0.001 | (0.09, 2.44)   | (0.23, 1.73)  | (-0.04, 0.12)  | 0.321        | —              | —             | —             | —      |
|                                  | 1.23           | 1.17          | -0.18          |        | 4.09           | 3.88          | -0.18          |        | 1.18           | 1.16          | 0.00           |              | 0.01           | 0.02          | 3.12          |        |
| Montenegro                       | (0.09, 5.32)   | (0.07, 6.00)  | (-0.26, -0.10) | <0.001 | (1.35, 9.57)   | (1.22, 9.87)  | (-0.22, -0.14) | <0.001 | (0.08, 5.24)   | (0.07, 6.01)  | (-0.32, 0.33)  | 0.982        | (0.00, 3.17)   | (0.00, 4.16)  | (3.12, 3.12)  | <0.001 |
|                                  | 1.29           | 1.30          | 0.02           |        | 4.26           | 4.31          | 0.03           |        | 0.54           | 0.56          | 0.11           |              |                |               |               |        |
| Morocco                          | (0.97, 1.68)   | (1.05, 1.59)  | (-0.05, 0.09)  | 0.592  | (3.66, 4.94)   | (3.85, 4.81)  | (-0.01, 0.07)  | 0.103  | (0.34, 0.81)   | (0.41, 0.76)  | (0.03, 0.19)   | 0.006        | —              | —             | —             | —      |
|                                  | 0.80           | 0.81          | 0.04           |        | 2.66           | 2.69          | 0.05           |        | 0.62           | 0.68          | 0.32           |              | 0.01           | 0.01          | 0.00          |        |
| Mozambique                       | (0.47, 1.29)   | (0.56, 1.13)  | (0.00, 0.08)   | 0.047  | (2.01, 3.46)   | (2.22, 3.22)  | (-0.01, 0.10)  | 0.114  | (0.33, 1.06)   | (0.46, 0.97)  | (0.14, 0.50)   | 0.001        | (0.00, 0.19)   | (0.00, 0.10)  | (0.00, 0.00)* | <0.001 |
|                                  | 2.18           | 2.20          | 0.03           | 0.604  | 7.22           | 7.30          | 0.03           | 0.371  | 0.93           | 1.03          | 0.36           | 0.015        | 0.01           | 0.01          | 0.00          | 0.007  |

|                 |                 |                 |                |        |                 |                 |                |        |                 |                 |                |              |                 |                 |               |        |
|-----------------|-----------------|-----------------|----------------|--------|-----------------|-----------------|----------------|--------|-----------------|-----------------|----------------|--------------|-----------------|-----------------|---------------|--------|
|                 | (1.85, 2.55)    | (1.94, 2.49)    | (-0.07, 0.12)  |        | (6.61, 7.88)    | (6.81, 7.81)    | (-0.03, 0.09)  |        | (0.71, 1.18)    | (0.85, 1.23)    | (0.07, 0.65)   | (0.00, 0.06) | (0.00, 0.05)    | (0.00, 0.00)*   |               |        |
|                 | 1.22            | 1.23            | 0.03           |        | 4.06            | 4.09            | 0.04           |        | 0.92            | 0.84            | -0.35          | 0.01         | 0.01            | 0.00            |               |        |
| Namibia         | (0.21, 3.93)    | (0.43, 2.76)    | (-0.07, 0.13)  | 0.522  | (1.78, 7.93)    | (2.44, 6.44)    | (0.00, 0.07)   | 0.053  | (0.10, 3.46)    | (0.22, 2.20)    | (-0.61, -0.08) | 0.011        | (0.00, 1.87)    | (0.00, 0.85)    | (0.00, 0.00)* | <0.001 |
|                 | 2.15            | 2.24            | 0.13           |        | 7.14            | 7.42            | 0.12           |        | 11.19           | 13.81           | 0.73           |              | 0.20            | 0.25            | 0.81          |        |
| Nauru           | (0.00, 211.61)  | (0.00, 190.47)  | (0.07, 0.20)   | <0.001 | (0.00, 221.81)  | (0.00, 201.03)  | (0.10, 0.15)   | <0.001 | (0.00, 229.78)  | (0.00, 213.50)  | (0.64, 0.82)   | <0.001       | (0.00, 207.59)  | (0.00, 186.38)  | (0.75, 0.88)  | <0.001 |
|                 | 1.88            | 1.87            | -0.03          |        | 6.23            | 6.20            | -0.02          |        | 0.63            | 0.70            | 0.26           |              |                 |                 |               |        |
| Nepal           | (1.42, 2.43)    | (1.54, 2.24)    | (-0.10, 0.04)  | 0.379  | (5.37, 7.19)    | (5.59, 6.85)    | (-0.04, 0.00)  | 0.075  | (0.38, 0.99)    | (0.50, 0.94)    | (-0.16, 0.67)  | 0.223        | —               | —               | —             | —      |
|                 | 0.97            | 0.87            | -0.39          |        | 3.21            | 2.87            | -0.39          |        | 0.54            | 0.46            | -0.56          |              |                 |                 |               |        |
| Netherlands     | (0.65, 1.39)    | (0.56, 1.30)    | (-0.47, -0.30) | <0.001 | (2.61, 3.91)    | (2.28, 3.58)    | (-0.43, -0.35) | <0.001 | (0.32, 0.88)    | (0.24, 0.80)    | (-0.72, -0.39) | <0.001       | —               | —               | —             | —      |
|                 | 2.52            | 2.35            | -0.24          |        | 8.38            | 7.81            | -0.24          |        | 0.98            | 0.86            | -0.40          |              | 0.01            |                 |               |        |
| New Zealand     | (1.49, 4.02)    | (1.40, 3.75)    | (-0.28, -0.20) | <0.001 | (6.37, 10.82)   | (5.97, 10.06)   | (-0.27, -0.21) | <0.001 | (0.39, 2.05)    | (0.34, 1.85)    | (-0.45, -0.36) | <0.001       | (0.00, 0.57)    | —               | —             | —      |
|                 | 0.74            | 0.75            | 0.04           |        | 2.45            | 2.47            | 0.04           |        | 0.68            | 0.65            | -0.26          |              | 0.01            | 0.01            | 0.00          |        |
| Nicaragua       | (0.21, 1.87)    | (0.35, 1.38)    | (-0.05, 0.12)  | 0.376  | (1.32, 4.15)    | (1.70, 3.48)    | (-0.03, 0.11)  | 0.307  | (0.18, 1.79)    | (0.29, 1.25)    | (-0.56, 0.04)  | 0.093        | (0.00, 0.70)    | (0.00, 0.30)    | (0.00, 0.00)* | <0.001 |
|                 | 1.24            | 1.25            | 0.02           |        | 4.11            | 4.14            | 0.02           |        | 0.49            | 0.53            | 0.24           |              |                 |                 |               |        |
| Niger           | (0.66, 2.14)    | (0.87, 1.74)    | (-0.10, 0.14)  | 0.770  | (2.95, 5.57)    | (3.41, 4.97)    | (-0.00, 0.04)  | 0.064  | (0.16, 1.16)    | (0.30, 0.88)    | (0.05, 0.43)   | 0.012        | —               | —               | —             | —      |
|                 | 1.36            | 1.39            | 0.10           |        | 4.51            | 4.61            | 0.08           |        | 0.56            | 0.57            | 0.02           |              |                 |                 |               |        |
| Nigeria         | (1.16, 1.58)    | (1.27, 1.52)    | (-0.06, 0.26)  | 0.202  | (4.13, 4.91)    | (4.38, 4.85)    | (0.04, 0.12)   | <0.001 | (0.44, 0.72)    | (0.49, 0.65)    | (-0.10, 0.13)  | 0.777        | —               | —               | —             | —      |
|                 | 2.19            | 2.25            | 0.09           |        | 7.27            | 7.48            | 0.09           |        | 9.16            | 9.73            | 0.18           |              | 0.16            | 0.17            | 0.22          |        |
| Niue            | (0.00, 1044.34) | (0.00, 1465.89) | (0.01, 0.18)   | 0.022  | (0.00, 1054.92) | (0.00, 1475.94) | (0.07, 0.11)   | <0.001 | (0.00, 1058.87) | (0.00, 1480.47) | (0.11, 0.26)   | <0.001       | (0.00, 1040.10) | (0.00, 1461.81) | (-0.02, 0.46) | 0.077  |
|                 | 1.16            | 1.11            | -0.16          |        | 3.84            | 3.69            | -0.14          |        | 0.62            | 0.58            | -0.20          |              |                 |                 |               |        |
| North Macedonia | (0.36, 2.80)    | (0.36, 2.93)    | (-0.23, -0.09) | <0.001 | (2.18, 6.30)    | (2.14, 6.19)    | (-0.17, -0.11) | <0.001 | (0.10, 2.01)    | (0.10, 2.20)    | (-0.32, -0.08) | 0.001        | —               | —               | —             | —      |

|                          |         |         |         |        |         |         |         |        |         |         |         |        |         |         |         |        |
|--------------------------|---------|---------|---------|--------|---------|---------|---------|--------|---------|---------|---------|--------|---------|---------|---------|--------|
| Northern Mariana Islands | 2.15    | 2.22    | 0.09    |        | 7.13    | 7.35    | 0.08    |        | 9.81    | 9.14    | -0.24   |        | 0.17    | 0.16    | -0.38   |        |
|                          | (0.00,  | (0.00,  | (0.03,  | 0.004  | (0.07,  | (0.00,  | (0.03,  | 0.003  | (0.32,  | (0.00,  | (-0.48, | 0.044  | (0.00,  | (0.00,  | (-0.79, | 0.062  |
|                          | 41.09)  | 103.23) | 0.14)   |        | 50.08)  | 113.49) | 0.14)   |        | 54.49)  | 116.90) | -0.01)  |        | 37.35)  | 99.00)  | 0.02)   |        |
| Norway                   | 1.14    | 1.02    | -0.38   |        | 3.78    | 3.40    | -0.37   |        | 0.60    | 0.48    | -0.73   |        |         |         |         |        |
|                          | (0.53,  | (0.48,  | (-0.43, | <0.001 | (2.57,  | (2.33,  | (-0.41, | <0.001 | (0.19,  | (0.14,  | (-0.88, | <0.001 | —       | —       | —       | —      |
|                          | 2.17)   | 1.96)   | -0.33)  |        | 5.39)   | 4.84)   | -0.33)  |        | 1.45)   | 1.24)   | -0.57)  |        |         |         |         |        |
| Oman                     | 1.22    | 1.30    | 0.21    |        | 4.06    | 4.30    | 0.19    |        | 0.69    | 0.72    | 0.17    |        | 0.01    | 0.01    | 0.00    |        |
|                          | (0.25,  | (0.65,  | (0.17,  | <0.001 | (1.92,  | (3.01,  | (0.17,  | <0.001 | (0.06,  | (0.27,  | (-0.06, | 0.138  | (0.00,  | (0.00,  | (0.00,  | 0.019  |
|                          | 3.63)   | 2.42)   | 0.25)   |        | 7.56)   | 6.03)   | 0.22)   |        | 2.80)   | 1.66)   | 0.40)   |        | 1.60)   | 0.65)   | 0.00)*  |        |
| Pakistan                 | 2.03    | 2.08    | 0.08    |        | 6.74    | 6.88    | 0.07    |        | 0.75    | 0.84    | 0.42    |        |         |         |         |        |
|                          | (1.81,  | (1.93,  | (0.02,  | 0.009  | (6.33,  | (6.62,  | (0.03,  | <0.001 | (0.61,  | (0.75,  | (0.35,  | <0.001 | —       | —       | —       | —      |
|                          | 2.28)   | 2.23)   | 0.14)   |        | 7.18)   | 7.16)   | 0.10)   |        | 0.90)   | 0.94)   | 0.49)   |        |         |         |         |        |
| Palau                    | 2.19    | 2.24    | 0.07    |        | 7.27    | 7.43    | 0.07    |        | 7.95    | 7.39    | -0.27   |        | 0.14    | 0.13    | -0.25   |        |
|                          | (0.00,  | (0.00,  | (-0.01, | 0.067  | (0.00,  | (0.00,  | (0.02,  | 0.006  | (0.00,  | (0.00,  | (-0.41, | <0.001 | (0.00,  | (0.00,  | (-0.25, | <0.001 |
|                          | 125.31) | 173.97) | 0.14)   |        | 135.52) | 182.33) | 0.11)   |        | 136.76) | 182.51) | -0.13)  |        | 121.10) | 170.43) | -0.25)  |        |
| Palestine                | 1.22    | 1.23    | 0.03    |        | 4.03    | 4.09    | 0.04    |        | 0.83    | 1.22    | 1.35    |        | 0.01    | 0.02    | 2.21    |        |
|                          | (0.26,  | (0.59,  | (-0.07, | 0.532  | (1.93,  | (2.80,  | (0.02,  | 0.002  | (0.12,  | (0.59,  | (0.95,  | <0.001 | (0.00,  | (0.00,  | (2.21,  | <0.001 |
|                          | 3.55)   | 2.28)   | 0.13)   |        | 7.44)   | 5.76)   | 0.07)   |        | 2.95)   | 2.24)   | 1.75)   |        | 1.54)   | 0.50)   | 2.21)   |        |
| Panama                   | 0.73    | 0.74    | 0.05    |        | 2.43    | 2.46    | 0.04    |        | 0.57    | 0.59    | 0.21    |        | 0.01    | 0.01    | 0.00    |        |
|                          | (0.15,  | (0.26,  | (0.05,  | <0.001 | (1.16,  | (1.48,  | (-0.03, | 0.260  | (0.09,  | (0.18,  | (0.08,  | 0.003  | (0.00,  | (0.00,  | (0.00,  | <0.001 |
|                          | 2.15)   | 1.64)   | 0.05)   |        | 4.49)   | 3.84)   | 0.12)   |        | 1.90)   | 1.43)   | 0.34)   |        | 0.93)   | 0.50)   | 0.00)*  |        |
| Papua New Guinea         | 2.08    | 2.14    | 0.09    |        | 6.90    | 7.11    | 0.10    |        | 4.70    | 6.21    | 1.01    |        | 0.08    | 0.11    | 1.23    |        |
|                          | (1.11,  | (1.52,  | (0.02,  | 0.011  | (4.98,  | (5.93,  | (0.04,  | 0.001  | (3.15,  | (5.11,  | (0.91,  | <0.001 | (0.00,  | (0.01,  | (0.49,  | 0.001  |
|                          | 3.57)   | 2.93)   | 0.15)   |        | 9.32)   | 8.45)   | 0.15)   |        | 6.75)   | 7.47)   | 1.12)   |        | 0.76)   | 0.39)   | 1.98)   |        |
| Paraguay                 | 0.98    | 0.99    | 0.04    |        | 3.25    | 3.28    | 0.04    |        | 1.57    | 1.38    | -0.39   |        | 0.02    | 0.02    | 0.00    |        |
|                          | (0.37,  | (0.54,  | (-0.07, | 0.453  | (2.01,  | (2.39,  | (0.01,  | 0.022  | (0.76,  | (0.84,  | (-0.63, | 0.002  | (0.00,  | (0.00,  | (0.00,  | <0.001 |
|                          | 2.10)   | 1.67)   | 0.15)   |        | 4.98)   | 4.39)   | 0.08)   |        | 2.87)   | 2.16)   | -0.14)  |        | 0.63)   | 0.31)   | 0.00)*  |        |
| Peru                     | 0.28    | 0.30    | 0.23    |        | 0.92    | 0.99    | 0.25    |        | 0.92    | 0.70    | -0.85   |        | 0.02    | 0.01    | -1.96   |        |
|                          | (0.13,  | (0.18,  | (0.23,  | <0.001 | (0.63,  | (0.77,  | (0.15,  | <0.001 | (0.63,  | (0.52,  | (-1.54, | 0.018  | (0.00,  | (0.00,  | (-4.95, | 0.211  |
|                          | 0.51)   | 0.46)   | 0.23)   |        | 1.29)   | 1.25)   | 0.36)   |        | 1.29)   | 0.93)   | -0.14)  |        | 0.14)   | 0.08)   | 1.13)   |        |
| Philippines              | 2.25    | 2.27    | 0.02    |        | 7.48    | 7.52    | 0.01    |        | 0.89    | 1.68    | 2.22    |        |         | 0.02    |         |        |
|                          | (1.97,  | (2.07,  | (-0.06, | 0.678  | (6.95,  | (7.15,  | (-0.02, | 0.466  | (0.72,  | (1.51,  | (1.91,  | <0.001 | —       | (0.01,  | —       | —      |
|                          | 2.56)   | 2.48)   | 0.09)   |        | 8.03)   | 7.91)   | 0.04)   |        | 1.10)   | 1.87)   | 2.52)   |        |         | 0.05)   |         |        |

|                          |        |        |         |        |        |        |         |        |        |        |         |        |        |        |         |        |
|--------------------------|--------|--------|---------|--------|--------|--------|---------|--------|--------|--------|---------|--------|--------|--------|---------|--------|
|                          | 1.47   | 1.47   | -0.00   |        | 4.88   | 4.86   | -0.01   |        | 0.65   | 0.63   | -0.15   |        |        |        |         |        |
| Poland                   | (1.23, | (1.22, | (-0.08, | 0.927  | (4.43, | (4.41, | (-0.06, | 0.627  | (0.49, | (0.48, | (-0.28, | 0.023  | —      | —      | —       | —      |
|                          | 1.75)  | 1.76)  | 0.07)   |        | 5.37)  | 5.36)  | 0.04)   |        | 0.85)  | 0.85)  | -0.02)  |        |        |        |         |        |
|                          | 1.09   | 0.92   | -0.58   |        | 3.60   | 3.05   | -0.57   |        | 0.69   | 0.49   | -1.15   |        | 0.01   |        |         |        |
| Portugal                 | (0.67, | (0.54, | (-0.62, | <0.001 | (2.80, | (2.34, | (-0.60, | <0.001 | (0.37, | (0.23, | (-1.31, | <0.001 | (0.00, | —      | —       | —      |
|                          | 1.67)  | 1.50)  | -0.54)  |        | 4.56)  | 3.96)  | -0.55)  |        | 1.17)  | 0.97)  | -0.99)  |        | 0.21)  |        |         |        |
|                          | 0.73   | 0.75   | 0.08    |        | 2.42   | 2.50   | 0.09    |        | 0.56   | 0.57   | -0.06   |        | 0.01   | 0.01   | 0.00    |        |
| Puerto Rico              | (0.25, | (0.23, | (-0.02, | 0.122  | (1.42, | (1.42, | (0.06,  | <0.001 | (0.16, | (0.14, | (-0.35, | 0.672  | (0.00, | (0.00, | (0.00,  | <0.001 |
|                          | 1.67)  | 1.86)  | 0.19)   |        | 3.86)  | 4.12)  | 0.13)   |        | 1.44)  | 1.61)  | 0.23)   |        | 0.53)  | 0.72)  | 0.00)*  |        |
|                          | 1.27   | 1.30   | 0.05    |        | 4.22   | 4.30   | 0.06    |        | 0.70   | 0.69   | -0.04   |        | 0.01   | 0.01   |         |        |
| Qatar                    | (0.03, | (0.50, | (-0.04, | 0.285  | (0.90, | (2.67, | (-0.01, | 0.081  | (0.00, | (0.16, | (-0.15, | 0.438  | (0.00, | (0.00, | —       | —      |
|                          | 9.05)  | 3.49)  | 0.13)   |        | 13.45) | 7.12)  | 0.12)   |        | 8.15)  | 2.73)  | 0.07)   |        | 7.05)  | 1.91)  |         |        |
|                          | 0.83   | 0.73   | -0.45   |        | 2.75   | 2.42   | -0.44   |        | 0.53   | 0.42   | -0.75   |        | 0.01   |        |         |        |
| Republic of Korea        | (0.65, | (0.57, | (-0.53, | <0.001 | (2.41, | (2.13, | (-0.50, | <0.001 | (0.39, | (0.31, | (-0.83, | <0.001 | (0.00, | —      | —       | —      |
|                          | 1.03)  | 0.93)  | -0.37)  |        | 3.11)  | 2.75)  | -0.38)  |        | 0.70)  | 0.58)  | -0.67)  |        | 0.05)  |        |         |        |
|                          | 1.65   | 1.70   | 0.08    |        | 5.47   | 5.63   | 0.09    |        | 0.65   | 0.67   | 0.09    |        |        |        |         |        |
| Republic of<br>Moldova   | (0.96, | (0.93, | (-0.04, | 0.190  | (4.13, | (4.14, | (0.05,  | <0.001 | (0.26, | (0.24, | (-0.08, | 0.295  | —      | —      | —       | —      |
|                          | 2.71)  | 3.03)  | 0.19)   |        | 7.16)  | 7.63)  | 0.13)   |        | 1.45)  | 1.75)  | 0.27)   |        |        |        |         |        |
|                          | 1.21   | 1.16   | -0.16   |        | 4.03   | 3.84   | -0.17   |        | 0.57   | 0.56   | -0.06   |        |        |        |         |        |
| Romania                  | (0.92, | (0.83, | (-0.26, | 0.001  | (3.47, | (3.21, | (-0.24, | <0.001 | (0.37, | (0.34, | (-0.26, | 0.577  | —      | —      | —       | —      |
|                          | 1.58)  | 1.60)  | -0.07)  |        | 4.65)  | 4.57)  | -0.10)  |        | 0.84)  | 0.90)  | 0.15)   |        |        |        |         |        |
|                          | 1.81   | 1.96   | 0.27    |        | 6.02   | 6.51   | 0.27    |        | 0.71   | 0.78   | 0.36    |        |        |        |         |        |
| Russian Federation       | (1.67, | (1.81, | (0.18,  | <0.001 | (5.76, | (6.24, | (0.21,  | <0.001 | (0.62, | (0.68, | (0.20,  | <0.001 | —      | —      | —       | —      |
|                          | 1.96)  | 2.12)  | 0.35)   |        | 6.28)  | 6.80)  | 0.32)   |        | 0.80)  | 0.88)  | 0.51)   |        |        |        |         |        |
|                          | 0.80   | 0.80   | -0.01   |        | 2.66   | 2.66   | 0.00    |        | 1.07   | 0.94   | -0.49   |        | 0.02   | 0.01   | -2.69   |        |
| Rwanda                   | (0.36, | (0.48, | (-0.09, | 0.832  | (1.78, | (2.04, | (-0.06, | 0.968  | (0.55, | (0.60, | (-0.79, | 0.001  | (0.00, | (0.00, | (-3.65, | <0.001 |
|                          | 1.54)  | 1.25)  | 0.07)   |        | 3.83)  | 3.41)  | 0.06)   |        | 1.88)  | 1.42)  | -0.19)  |        | 0.38)  | 0.18)  | -1.72)  |        |
|                          | 0.73   | 0.74   | 0.06    |        | 2.41   | 2.44   | 0.04    |        | 1.90   | 0.62   | -3.81   |        | 0.03   | 0.01   | -3.94   |        |
| Saint Kitts and<br>Nevis | (0.00, | (0.00, | (-0.03, | 0.203  | (0.00, | (0.00, | (-0.04, | 0.382  | (0.00, | (0.00, | (-4.08, | <0.001 | (0.00, | (0.00, | (-8.10, | 0.075  |
|                          | 52.01) | 37.67) | 0.16)   |        | 55.41) | 40.67) | 0.12)   |        | 54.27) | 37.46) | -3.54)  |        | 50.60) | 36.36) | 0.40)   |        |
|                          | 0.74   | 0.73   | -0.01   |        | 2.45   | 2.43   | -0.02   |        | 0.90   | 0.77   | -0.52   |        | 0.01   | 0.01   | 0.00    |        |
| Saint Lucia              | (0.00, | (0.00, | (-0.12, | 0.836  | (0.00, | (0.04, | (-0.10, | 0.532  | (0.00, | (0.00, | (-1.15, | 0.112  | (0.00, | (0.00, | (-0.00, | 1.000  |
|                          | 19.61) | 13.56) | 0.10)   |        | 22.89) | 16.41) | 0.05)   |        | 19.91) | 13.64) | 0.12)   |        | 18.16) | 12.26) | 0.00)   |        |

|                                     |        |        |         |        |         |        |         |        |        |        |         |        |        |        |         |        |
|-------------------------------------|--------|--------|---------|--------|---------|--------|---------|--------|--------|--------|---------|--------|--------|--------|---------|--------|
| Saint Vincent and<br>the Grenadines | 0.71   | 0.73   | 0.10    |        | 2.35    | 2.43   | 0.12    |        | 1.05   | 1.00   | -0.13   |        | 0.02   | 0.01   | -2.25   |        |
|                                     | (0.00, | (0.00, | (-0.02, | 0.093  | (0.00,  | (0.00, | (0.09,  | <0.001 | (0.00, | (0.00, | (-1.01, | 0.774  | (0.00, | (0.00, | (-2.25, | <0.001 |
|                                     | 25.25) | 19.77) | 0.21)   |        | 28.46)  | 22.89) | 0.16)   |        | 25.86) | 20.30) | 0.76)   |        | 23.87) | 18.36) | -2.25)  |        |
| Samoa                               | 2.21   | 2.26   | 0.07    |        | 7.33    | 7.50   | 0.08    |        | 9.08   | 10.55  | 0.52    |        | 0.16   | 0.19   | 0.68    |        |
|                                     | (0.00, | (0.02, | (0.03,  | 0.002  | (0.60,  | (1.20, | (0.05,  | <0.001 | (1.11, | (2.51, | (0.41,  | <0.001 | (0.00, | (0.00, | (0.53,  | <0.001 |
|                                     | 21.39) | 15.87) | 0.12)   |        | 30.27)  | 24.52) | 0.10)   |        | 33.01) | 29.06) | 0.62)   |        | 17.44) | 11.97) | 0.83)   |        |
| San Marino                          | 1.06   | 0.91   | -0.52   |        | 3.50    | 3.03   | -0.50   |        | 0.52   | 0.51   | -0.08   |        |        |        |         |        |
|                                     | (0.00, | (0.00, | (-0.56, | <0.001 | (0.00,  | (0.00, | (-0.53, | <0.001 | (0.00, | (0.00, | (-0.16, | 0.049  | —      | —      | —       | —      |
|                                     | 95.48) | 80.54) | -0.48)  |        | 100.47) | 84.11) | -0.47)  |        | 94.37) | 79.84) | 0.00)   |        |        |        |         |        |
| Sao Tome and<br>Principe            | 1.33   | 1.38   | 0.10    |        | 4.42    | 4.57   | 0.11    |        | 0.55   | 0.65   | 0.64    |        |        |        |         |        |
|                                     | (0.00, | (0.00, | (0.03,  | 0.009  | (0.02,  | (0.41, | (0.08,  | <0.001 | (0.00, | (0.00, | (0.43,  | <0.001 | —      | —      | —       | —      |
|                                     | 27.96) | 12.74) | 0.18)   |        | 33.79)  | 18.24) | 0.13)   |        | 26.43) | 11.36) | 0.85)   |        |        |        |         |        |
| Saudi Arabia                        | 1.23   | 1.25   | 0.04    |        | 4.09    | 4.15   | 0.05    |        | 0.75   | 0.65   | -0.51   |        | 0.01   | 0.01   | 0.00    |        |
|                                     | (0.80, | (1.03, | (0.02,  | 0.002  | (3.26,  | (3.74, | (0.03,  | <0.001 | (0.43, | (0.49, | (-0.65, | <0.001 | (0.00, | (0.00, | (0.00,  | 0.143  |
|                                     | 1.81)  | 1.51)  | 0.07)   |        | 5.06)   | 4.60)  | 0.07)   |        | 1.22)  | 0.85)  | -0.37)  |        | 0.20)  | 0.08)  | 0.00)   |        |
| Senegal                             | 1.29   | 1.29   | -0.02   |        | 4.28    | 4.28   | -0.02   |        | 0.49   | 0.53   | 0.28    |        |        |        |         |        |
|                                     | (0.70, | (0.88, | (-0.12, | 0.694  | (3.12,  | (3.50, | (-0.10, | 0.710  | (0.16, | (0.28, | (0.04,  | 0.023  | —      | —      | —       | —      |
|                                     | 2.18)  | 1.83)  | 0.08)   |        | 5.74)   | 5.19)  | 0.07)   |        | 1.13)  | 0.91)  | 0.51)   |        |        |        |         |        |
| Serbia                              | 1.13   | 1.12   | -0.10   |        | 3.75    | 3.72   | -0.09   |        | 0.84   | 0.72   | -0.54   |        | 0.01   | 0.01   | 0.00    |        |
|                                     | (0.70, | (0.67, | (-0.28, | 0.313  | (2.93,  | (2.85, | (-0.25, | 0.295  | (0.48, | (0.37, | (-0.82, | <0.001 | (0.00, | (0.00, | (0.00,  | 0.006  |
|                                     | 1.74)  | 1.81)  | 0.09)   |        | 4.75)   | 4.81)  | 0.08)   |        | 1.39)  | 1.31)  | -0.27)  |        | 0.26)  | 0.33)  | 0.00)*  |        |
| Seychelles                          | 2.25   | 2.28   | 0.04    |        | 7.46    | 7.56   | 0.04    |        | 1.09   | 1.15   | 0.23    |        | 0.01   | 0.01   | 0.00    |        |
|                                     | (0.00, | (0.00, | (-0.02, | 0.179  | (0.09,  | (0.51, | (-0.01, | 0.110  | (0.00, | (0.00, | (-0.15, | 0.228  | (0.00, | (0.00, | (0.00,  | <0.001 |
|                                     | 39.80) | 27.84) | 0.10)   |        | 49.46)  | 36.38) | 0.09)   |        | 37.60) | 25.90) | 0.62)   |        | 35.48) | 23.87) | 0.00)*  |        |
| Sierra Leone                        | 1.40   | 1.34   | -0.15   |        | 4.65    | 4.46   | -0.15   |        | 0.52   | 0.56   | 0.24    |        |        |        |         |        |
|                                     | (0.62, | (0.80, | (-0.22, | <0.001 | (3.07,  | (3.40, | (-0.21, | <0.001 | (0.11, | (0.23, | (0.08,  | 0.004  | —      | —      | —       | —      |
|                                     | 2.74)  | 2.12)  | -0.08)  |        | 6.77)   | 5.74)  | -0.08)  |        | 1.53)  | 1.12)  | 0.40)   |        |        |        |         |        |
| Singapore                           | 0.81   | 0.74   | -0.35   |        | 2.69    | 2.47   | -0.30   |        | 0.63   | 0.42   | -1.43   |        | 0.01   |        |         |        |
|                                     | (0.30, | (0.37, | (-0.39, | <0.001 | (1.65,  | (1.74, | (-0.34, | <0.001 | (0.20, | (0.15, | (-1.76, | <0.001 | (0.00, | —      | —       | —      |
|                                     | 1.83)  | 1.59)  | -0.31)  |        | 4.21)   | 3.59)  | -0.26)  |        | 1.59)  | 1.20)  | -1.10)  |        | 0.66)  |        |         |        |
| Slovakia                            | 1.28   | 1.24   | -0.10   |        | 4.26    | 4.10   | -0.12   |        | 0.66   | 0.58   | -0.44   |        | 0.01   |        |         |        |
|                                     | (0.72, | (0.68, | (-0.23, | 0.120  | (3.16,  | (3.02, | (-0.19, | <0.001 | (0.28, | (0.23, | (-0.59, | <0.001 | (0.00, | —      | —       | —      |
|                                     | 2.17)  | 2.22)  | 0.03)   |        | 5.66)   | 5.56)  | -0.06)  |        | 1.37)  | 1.40)  | -0.28)  |        | 0.43)  |        |         |        |

|                 |        |        |         |        |        |        |         |        |        |        |         |        |        |        |         |        |
|-----------------|--------|--------|---------|--------|--------|--------|---------|--------|--------|--------|---------|--------|--------|--------|---------|--------|
|                 | 1.19   | 1.14   | -0.17   |        | 3.95   | 3.77   | -0.20   |        | 0.61   | 0.51   | -0.63   |        |        |        |         |        |
| Slovenia        | (0.39, | (0.33, | (-0.35, | 0.057  | (2.30, | (2.11, | (-0.32, | 0.001  | (0.10, | (0.06, | (-1.00, | 0.001  | —      | —      | —       | —      |
|                 | 2.93)  | 3.35)  | 0.01)   |        | 6.45)  | 6.66)  | -0.08)  |        | 2.10)  | 2.51)  | -0.26)  |        |        |        |         |        |
|                 | 2.06   | 2.17   | 0.17    |        | 6.82   | 7.18   | 0.17    |        | 7.88   | 9.94   | 0.81    |        | 0.14   | 0.18   | 0.86    |        |
| Solomon Islands | (0.04, | (0.36, | (0.11,  | <0.001 | (1.35, | (3.16, | (0.15,  | <0.001 | (1.84, | (5.06, | (0.68,  | <0.001 | (0.00, | (0.00, | (0.38,  | <0.001 |
|                 | 12.67) | 6.93)  | 0.22)   |        | 20.36) | 13.99) | 0.19)   |        | 21.91) | 17.56) | 0.94)   |        | 9.12)  | 3.57)  | 1.34)   |        |
|                 | 0.76   | 0.77   | 0.06    |        | 2.53   | 2.54   | 0.02    |        | 0.79   | 0.62   | -0.84   |        | 0.01   | 0.01   | 0.00    |        |
| Somalia         | (0.35, | (0.48, | (-0.03, | 0.179  | (1.71, | (1.99, | (-0.02, | 0.311  | (0.37, | (0.36, | (-1.03, | <0.001 | (0.00, | (0.00, | (0.00,  | <0.001 |
|                 | 1.46)  | 1.16)  | 0.14)   |        | 3.62)  | 3.19)  | 0.06)   |        | 1.50)  | 0.98)  | -0.65)  |        | 0.36)  | 0.15)  | 0.00)*  |        |
|                 | 1.42   | 1.37   | -0.11   |        | 4.71   | 4.53   | -0.13   |        | 3.15   | 1.60   | -2.25   |        | 0.05   | 0.02   | -3.33   |        |
| South Africa    | (1.15, | (1.17, | (-0.23, | 0.064  | (4.20, | (4.16, | (-0.19, | <0.001 | (2.74, | (1.39, | (-3.52, | 0.001  | (0.01, | (0.00, | (-4.81, | <0.001 |
|                 | 1.74)  | 1.59)  | 0.01)   |        | 5.27)  | 4.93)  | -0.08)  |        | 3.61)  | 1.84)  | -0.96)  |        | 0.14)  | 0.07)  | -1.83)  |        |
|                 | 0.74   | 0.76   | 0.08    |        | 2.47   | 2.53   | 0.07    |        | 0.85   | 0.67   | -0.79   |        | 0.01   | 0.01   | 0.00    |        |
| South Sudan     | (0.26, | (0.39, | (-0.01, | 0.087  | (1.46, | (1.79, | (-0.00, | 0.052  | (0.33, | (0.32, | (-0.96, | <0.001 | (0.00, | (0.00, | (0.00,  | <0.001 |
|                 | 1.68)  | 1.36)  | 0.16)   |        | 3.91)  | 3.48)  | 0.15)   |        | 1.82)  | 1.24)  | -0.62)  |        | 0.55)  | 0.29)  | 0.00)*  |        |
|                 | 1.12   | 0.94   | -0.61   |        | 3.71   | 3.14   | -0.58   |        | 0.64   | 0.51   | -0.79   |        | 0.01   |        |         |        |
| Spain           | (0.88, | (0.75, | (-0.66, | <0.001 | (3.27, | (2.78, | (-0.60, | <0.001 | (0.47, | (0.37, | (-0.89, | <0.001 | (0.00, | —      | —       | —      |
|                 | 1.40)  | 1.18)  | -0.55)  |        | 4.19)  | 3.53)  | -0.55)  |        | 0.86)  | 0.70)  | -0.69)  |        | 0.07)  |        |         |        |
|                 | 2.15   | 2.20   | 0.08    |        | 7.14   | 7.30   | 0.08    |        | 0.81   | 0.84   | 0.11    |        |        |        |         |        |
| Sri Lanka       | (1.69, | (1.79, | (0.04,  | <0.001 | (6.27, | (6.54, | (0.06,  | <0.001 | (0.53, | (0.60, | (-0.19, | 0.465  | —      | —      | —       | —      |
|                 | 2.71)  | 2.68)  | 0.13)   |        | 8.10)  | 8.13)  | 0.09)   |        | 1.17)  | 1.16)  | 0.42)   |        |        |        |         |        |
|                 | 1.23   | 1.29   | 0.13    |        | 4.09   | 4.29   | 0.16    |        | 0.53   | 0.58   | 0.28    |        |        |        |         |        |
| Sudan           | (0.87, | (1.05, | (0.09,  | <0.001 | (3.40, | (3.84, | (0.12,  | <0.001 | (0.31, | (0.43, | (0.21,  | <0.001 | —      | —      | —       | —      |
|                 | 1.70)  | 1.58)  | 0.17)   |        | 4.89)  | 4.79)  | 0.21)   |        | 0.87)  | 0.78)  | 0.36)   |        |        |        |         |        |
|                 | 0.71   | 0.73   | 0.07    |        | 2.35   | 2.42   | 0.09    |        | 0.96   | 1.02   | 0.29    |        | 0.01   | 0.01   | 0.78    |        |
| Suriname        | (0.00, | (0.01, | (-0.03, | 0.171  | (0.14, | (0.44, | (0.05,  | <0.001 | (0.00, | (0.04, | (-1.04, | 0.671  | (0.00, | (0.00, | (0.78,  | <0.001 |
|                 | 7.74)  | 4.89)  | 0.18)   |        | 10.64) | 7.60)  | 0.14)   |        | 8.19)  | 5.38)  | 1.64)   |        | 6.39)  | 3.57)  | 0.78)   |        |
|                 | 1.38   | 1.26   | -0.51   |        | 4.59   | 4.19   | -0.52   |        | 0.64   | 0.56   | -0.56   |        |        |        |         |        |
| Sweden          | (0.86, | (0.79, | (-0.79, | <0.001 | (3.60, | (3.28, | (-0.81, | 0.001  | (0.31, | (0.27, | (-0.94, | 0.004  | —      | —      | —       | —      |
|                 | 2.13)  | 1.95)  | -0.23)  |        | 5.80)  | 5.30)  | -0.22)  |        | 1.21)  | 1.08)  | -0.18)  |        |        |        |         |        |
|                 | 0.97   | 0.83   | -0.54   |        | 3.23   | 2.77   | -0.55   |        | 0.49   | 0.43   | -0.44   |        |        |        |         |        |
| Switzerland     | (0.53, | (0.46, | (-0.73, | <0.001 | (2.35, | (2.04, | (-0.72, | <0.001 | (0.19, | (0.18, | (-0.63, | <0.001 | —      | —      | —       | —      |
|                 | 1.71)  | 1.48)  | -0.36)  |        | 4.37)  | 3.74)  | -0.38)  |        | 1.08)  | 0.98)  | -0.25)  |        |        |        |         |        |

|                            |         |         |         |        |          |          |         |        |          |          |         |        |         |         |        |        |
|----------------------------|---------|---------|---------|--------|----------|----------|---------|--------|----------|----------|---------|--------|---------|---------|--------|--------|
| Syrian Arab Republic       | 1.26    | 1.28    | 0.06    |        | 4.19     | 4.26     | 0.06    |        | 0.63     | 0.65     | 0.09    |        |         |         |        |        |
|                            | (0.78,  | (0.90,  | (-0.02, | 0.157  | (3.24,   | (3.55,   | (0.02,  | 0.001  | (0.30,   | (0.38,   | (-0.03, | 0.121  | —       | —       | —      | —      |
|                            | 1.94)   | 1.81)   | 0.15)   |        | 5.32)    | 5.10)    | 0.09)   |        | 1.15)    | 1.05)    | 0.21)   |        |         |         |        |        |
| Taiwan (Province of China) | 2.16    | 1.91    | -0.43   |        | 7.15     | 6.34     | -0.42   |        | 0.82     | 0.78     | -0.06   |        |         |         |        |        |
|                            | (1.75,  | (1.55,  | (-0.49, | <0.001 | (6.40,   | (5.68,   | (-0.46, | <0.001 | (0.58,   | (0.55,   | (-0.33, | 0.650  | —       | —       | —      | —      |
|                            | 2.63)   | 2.35)   | -0.38)  |        | 7.97)    | 7.08)    | -0.38)  |        | 1.13)    | 1.08)    | 0.20)   |        |         |         |        |        |
| Tajikistan                 | 1.38    | 1.42    | 0.11    |        | 4.59     | 4.71     | 0.09    |        | 0.61     | 0.68     | 0.39    |        |         |         |        |        |
|                            | (0.68,  | (0.92,  | (0.01,  | 0.027  | (3.19,   | (3.75,   | (0.03,  | 0.002  | (0.19,   | (0.35,   | (0.19,  | <0.001 | —       | —       | —      | —      |
|                            | 2.51)   | 2.10)   | 0.21)   |        | 6.41)    | 5.86)    | 0.15)   |        | 1.47)    | 1.19)    | 0.59)   |        |         |         |        |        |
| Thailand                   | 2.11    | 2.19    | 0.12    |        | 7.01     | 7.25     | 0.11    |        | 0.91     | 1.00     | 0.30    |        | 0.01    | 0.01    | 0.00   |        |
|                            | (1.86,  | (1.95,  | (0.09,  | <0.001 | (6.53,   | (6.83,   | (0.09,  | <0.001 | (0.75,   | (0.84,   | (0.09,  | 0.006  | (0.00,  | (0.00,  | (0.00, | 0.001  |
|                            | 2.39)   | 2.44)   | 0.16)   |        | 7.51)    | 7.70)    | 0.14)   |        | 1.11)    | 1.18)    | 0.52)   |        | 0.04)   | 0.05)   | 0.00)* |        |
| Timor-Leste                | 2.13    | 2.17    | 0.06    |        | 7.07     | 7.20     | 0.06    |        | 0.70     | 0.92     | 0.85    |        |         | 0.01    |        |        |
|                            | (0.39,  | (0.59,  | (-0.01, | 0.072  | (3.19,   | (3.83,   | (0.01,  | 0.016  | (0.01,   | (0.08,   | (0.37,  | 0.001  | —       | (0.00,  | —      | —      |
|                            | 6.64)   | 5.61)   | 0.13)   |        | 13.56)   | 12.34)   | 0.10)   |        | 4.35)    | 3.71)    | 1.34)   |        |         | 2.11)   |        |        |
| Togo                       | 1.30    | 1.30    | -0.01   |        | 4.32     | 4.32     | -0.01   |        | 0.54     | 0.58     | 0.25    |        |         |         |        |        |
|                            | (0.53,  | (0.79,  | (-0.09, | 0.709  | (2.74,   | (3.34,   | (-0.03, | 0.366  | (0.11,   | (0.26,   | (0.19,  | <0.001 | —       | —       | —      | —      |
|                            | 2.68)   | 2.02)   | 0.06)   |        | 6.48)    | 5.51)    | 0.01)   |        | 1.60)    | 1.11)    | 0.31)   |        |         |         |        |        |
| Tokelau                    | 2.13    | 2.22    | 0.13    |        | 7.06     | 7.38     | 0.14    |        | 10.36    | 11.79    | 0.44    |        | 0.18    | 0.21    | 0.47   |        |
|                            | (0.00,  | (0.00,  | (0.04,  | 0.004  | (0.00,   | (0.00,   | (0.07,  | <0.001 | (0.00,   | (0.00,   | (0.40,  | <0.001 | (0.00,  | (0.00,  | (0.37, | <0.001 |
|                            | 1707.94 | 2312.33 | 0.22)   |        | 1716.51) | 2322.85) | 0.21)   |        | 1722.65) | 2330.81) | 0.48)   |        | 1704.42 | 2308.50 | 0.57)  |        |
|                            | )       | )       |         |        |          |          |         |        |          |          |         |        | )       | )       |        |        |
| Tonga                      | 2.20    | 2.28    | 0.12    |        | 7.29     | 7.56     | 0.11    |        | 6.94     | 7.54     | 0.22    |        | 0.12    | 0.13    | 0.37   |        |
|                            | (0.00,  | (0.00,  | (0.05,  | <0.001 | (0.16,   | (0.42,   | (0.05,  | 0.001  | (0.13,   | (0.41,   | (0.13,  | <0.001 | (0.00,  | (0.00,  | (0.16, | <0.001 |
|                            | 32.95)  | 25.68)  | 0.18)   |        | 42.27)   | 35.01)   | 0.17)   |        | 41.59)   | 34.98)   | 0.32)   |        | 28.84)  | 21.43)  | 0.57)  |        |
| Trinidad and Tobago        | 0.73    | 0.74    | 0.05    |        | 2.43     | 2.45     | 0.02    |        | 0.77     | 0.82     | 0.08    |        | 0.01    | 0.01    | 0.00   |        |
|                            | (0.06,  | (0.11,  | (-0.03, | 0.256  | (0.83,   | (1.04,   | (-0.01, | 0.120  | (0.08,   | (0.14,   | (-0.60, | 0.826  | (0.00,  | (0.00,  | (0.00, | <0.001 |
|                            | 2.99)   | 2.92)   | 0.13)   |        | 5.51)    | 5.24)    | 0.06)   |        | 3.03)    | 3.05)    | 0.76)   |        | 1.70)   | 1.85)   | 0.00)* |        |
| Tunisia                    | 1.24    | 1.26    | 0.06    |        | 4.10     | 4.19     | 0.07    |        | 0.64     | 0.67     | 0.17    |        |         | 0.01    |        |        |
|                            | (0.71,  | (0.87,  | (-0.04, | 0.268  | (3.08,   | (3.46,   | (0.03,  | 0.001  | (0.29,   | (0.40,   | (0.13,  | <0.001 | —       | (0.00,  | —      | —      |
|                            | 2.00)   | 1.79)   | 0.16)   |        | 5.36)    | 5.05)    | 0.12)   |        | 1.24)    | 1.09)    | 0.22)   |        |         | 0.22)   |        |        |
| Turkey                     | 1.29    | 1.28    | -0.00   |        | 4.26     | 4.24     | 0.00    |        | 0.66     | 0.62     | -0.11   |        | 0.01    |         |        |        |
|                            | (1.07,  | (1.12,  | (-0.12, | 0.980  | (3.87,   | (3.94,   | (-0.05, | 0.989  | (0.51,   | (0.51,   | (-0.20, | 0.016  | (0.00,  | —       | —      | —      |

|                              |         |         |         |        |         |         |         |        |         |         |         |        |         |         |        |
|------------------------------|---------|---------|---------|--------|---------|---------|---------|--------|---------|---------|---------|--------|---------|---------|--------|
|                              | 1.53)   | 1.45)   | 0.12)   |        | 4.69)   | 4.55)   | 0.05)   |        | 0.84)   | 0.75)   | -0.02)  |        | 0.05)   |         |        |
|                              | 1.40)   | 1.48)   | 0.18)   |        | 4.66)   | 4.91)   | 0.18)   |        | 0.58)   | 0.67)   | 0.54)   |        |         |         |        |
| Turkmenistan                 | (0.63,  | (0.81,  | (0.09,  | <0.001 | (3.10,  | (3.60,  | (0.14,  | <0.001 | (0.14,  | (0.25,  | (0.48,  | <0.001 | —       | —       | —      |
|                              | 2.70)   | 2.50)   | 0.27)   |        | 6.73)   | 6.56)   | 0.22)   |        | 1.58)   | 1.45)   | 0.60)   |        |         |         |        |
|                              | 2.14)   | 2.23)   | 0.14)   |        | 7.10)   | 7.38)   | 0.13)   |        | 9.66)   | 11.50)  | 0.60)   |        | 0.17)   | 0.21)   | 0.76)  |
| Tuvalu                       | (0.00,  | (0.00,  | (0.09,  | <0.001 | (0.00,  | (0.00,  | (0.09,  | <0.001 | (0.00,  | (0.00,  | (0.54,  | <0.001 | (0.00,  | (0.00,  | (0.47, |
|                              | 207.99) | 200.35) | 0.18)   |        | 217.81) | 210.86) | 0.17)   |        | 222.74) | 218.91) | 0.66)   |        | 204.04) | 196.19) | 1.05)  |
|                              | 0.80)   | 0.79)   | -0.04)  |        | 2.66)   | 2.62)   | -0.04)  |        | 0.72)   | 0.83)   | 0.50)   |        | 0.01)   | 0.01)   | 0.00)  |
| Uganda                       | (0.47,  | (0.58,  | (-0.11, | 0.355  | (2.01,  | (2.22,  | (-0.09, | 0.115  | (0.41,  | (0.62,  | (0.35,  | <0.001 | (0.00,  | (0.00,  | (0.00, |
|                              | 1.28)   | 1.05)   | 0.04)   |        | 3.45)   | 3.08)   | 0.01)   |        | 1.17)   | 1.09)   | 0.64)   |        | 0.19)   | 0.09)   | 0.00)* |
|                              | 1.87)   | 2.01)   | 0.26)   |        | 6.19)   | 6.67)   | 0.26)   |        | 0.67)   | 0.79)   | 0.52)   |        |         |         |        |
| Ukraine                      | (1.62,  | (1.74,  | (0.19,  | <0.001 | (5.74,  | (6.17,  | (0.24,  | <0.001 | (0.52,  | (0.63,  | (0.22,  | 0.001  | —       | —       | —      |
|                              | 2.14)   | 2.32)   | 0.32)   |        | 6.68)   | 7.21)   | 0.28)   |        | 0.84)   | 1.00)   | 0.83)   |        |         |         |        |
|                              | 1.33)   | 1.30)   | -0.07)  |        | 4.40)   | 4.33)   | -0.06)  |        | 0.66)   | 0.67)   | -0.15)  |        |         | 0.01)   |        |
| United Arab Emirates         | (0.34,  | (0.87,  | (-0.12, | 0.009  | (2.28,  | (3.55,  | (-0.09, | <0.001 | (0.07,  | (0.37,  | (-0.54, | 0.455  | —       | (0.00,  | —      |
|                              | 3.61)   | 2.07)   | -0.02)  |        | 7.74)   | 5.39)   | -0.03)  |        | 2.62)   | 1.34)   | 0.24)   |        |         | 0.58)   |        |
|                              | 1.24)   | 1.28)   | 0.10)   |        | 4.12)   | 4.23)   | 0.09)   |        | 0.59)   | 0.59)   | -0.01)  |        |         |         |        |
| United Kingdom               | (1.04,  | (1.09,  | (-0.04, | 0.166  | (3.74,  | (3.88,  | (0.01,  | 0.025  | (0.45,  | (0.47,  | (-0.09, | 0.844  | —       | —       | —      |
|                              | 1.47)   | 1.49)   | 0.25)   |        | 4.53)   | 4.61)   | 0.17)   |        | 0.76)   | 0.75)   | 0.07)   |        |         |         |        |
|                              | 0.85)   | 0.87)   | 0.09)   |        | 2.82)   | 2.88)   | 0.08)   |        | 0.85)   | 0.85)   | -0.02)  |        | 0.01)   | 0.01)   | 0.00)  |
| United Republic of Tanzania  | (0.58,  | (0.69,  | (-0.00, | 0.056  | (2.30,  | (2.54,  | (0.03,  | 0.004  | (0.58,  | (0.67,  | (-0.12, | 0.769  | (0.00,  | (0.00,  | (0.00, |
|                              | 1.21)   | 1.08)   | 0.18)   |        | 3.44)   | 3.25)   | 0.13)   |        | 1.21)   | 1.06)   | 0.09)   |        | 0.13)   | 0.06)   | 0.00)* |
|                              | 2.38)   | 3.13)   | 0.98)   |        | 7.89)   | 10.40)  | 0.96)   |        | 0.88)   | 1.12)   | 0.87)   |        |         |         |        |
| United States of America     | (2.25,  | (2.99,  | (0.85,  | <0.001 | (7.66,  | (10.14, | (0.89,  | <0.001 | (0.81,  | (1.04,  | (0.66,  | <0.001 | —       | —       | —      |
|                              | 2.51)   | 3.28)   | 1.11)   |        | 8.12)   | 10.66)  | 1.03)   |        | 0.96)   | 1.21)   | 1.08)   |        |         |         |        |
|                              | 0.72)   | 0.73)   | 0.05)   |        | 2.39)   | 2.43)   | 0.06)   |        | 0.78)   | 0.64)   | -0.67)  |        | 0.01)   | 0.01)   | 0.00)  |
| United States Virgin Islands | (0.00,  | (0.00,  | (-0.09, | 0.506  | (0.00,  | (0.00,  | (0.03,  | <0.001 | (0.00,  | (0.00,  | (-0.89, | <0.001 | (0.00,  | (0.00,  | (0.00, |
|                              | 20.78)  | 27.31)  | 0.19)   |        | 23.71)  | 30.13)  | 0.09)   |        | 20.90)  | 27.16)  | -0.45)  |        | 19.47)  | 26.06)  | 0.00)  |
|                              | 1.03)   | 1.06)   | 0.08)   |        | 3.42)   | 3.53)   | 0.10)   |        | 0.54)   | 0.51)   | -0.27)  |        |         |         |        |
| Uruguay                      | (0.37,  | (0.42,  | (-0.02, | 0.100  | (2.07,  | (2.24,  | (0.06,  | <0.001 | (0.12,  | (0.12,  | (-0.44, | 0.002  | —       | —       | —      |
|                              | 2.26)   | 2.24)   | 0.18)   |        | 5.31)   | 5.32)   | 0.14)   |        | 1.57)   | 1.47)   | -0.10)  |        |         |         |        |
|                              | 1.37)   | 1.43)   | 0.15)   |        | 4.56)   | 4.74)   | 0.14)   |        | 0.59)   | 0.66)   | 0.42)   |        |         |         |        |
| Uzbekistan                   | (1.01,  | (1.16,  | (0.07,  | <0.001 | (3.87,  | (4.24,  | (0.09,  | <0.001 | (0.36,  | (0.49,  | (0.33,  | <0.001 | —       | —       | —      |



|                |        |        |         |        |         |         |         |        |        |        |         |        |        |        |         |        |
|----------------|--------|--------|---------|--------|---------|---------|---------|--------|--------|--------|---------|--------|--------|--------|---------|--------|
|                | 1.82)  | 1.74)  | 0.23)   |        | 5.34)   | 5.29)   | 0.19)   |        | 0.90)  | 0.89)  | 0.52)   |        |        |        |         |        |
|                | 2.28   | 2.29   | 0.00    |        | 7.56    | 7.60    | 0.01    |        | 5.25   | 9.46   | 1.96    |        | 0.09   | 0.17   | 1.98    |        |
| Vanuatu        | (0.00, | (0.09, | (-0.04, | 0.897  | (0.76,  | (1.98,  | (-0.02, | 0.595  | (0.25, | (2.98, | (1.61,  | <0.001 | (0.00, | (0.00, | (0.99,  | <0.001 |
|                | 20.27) | 11.69) | 0.04)   |        | 29.32)  | 19.96)  | 0.03)   |        | 25.47) | 22.56) | 2.32)   |        | 16.06) | 7.83)  | 2.98)   |        |
| Venezuela      | 0.79   | 0.77   | -0.07   |        | 2.62    | 2.55    | -0.09   |        | 0.68   | 0.71   | 0.20    |        | 0.01   | 0.01   | 0.00    |        |
| (Bolivarian    | (0.52, | (0.56, | (-0.16, | 0.129  | (2.11,  | (2.16,  | (-0.14, | <0.001 | (0.43, | (0.52, | (-0.38, | 0.492  | (0.00, | (0.00, | (-0.00, | 1.000  |
| Republic of)   | 1.15)  | 1.03)  | 0.02)   |        | 3.22)   | 2.99)   | -0.04)  |        | 1.01)  | 0.96)  | 0.79)   |        | 0.12)  | 0.09)  | 0.00)   |        |
|                | 2.13   | 2.30   | 0.26    |        | 7.06    | 7.65    | 0.27    |        | 0.85   | 1.07   | 0.72    |        | 0.01   | 0.01   | 0.00    |        |
| Viet Nam       | (1.87, | (2.11, | (0.22,  | <0.001 | (6.59,  | (7.29,  | (0.25,  | <0.001 | (0.70, | (0.94, | (0.57,  | <0.001 | (0.00, | (0.00, | (0.00,  | <0.001 |
|                | 2.41)  | 2.52)  | 0.30)   |        | 7.57)   | 8.02)   | 0.29)   |        | 1.04)  | 1.22)  | 0.87)   |        | 0.04)  | 0.04)  | 0.00)*  |        |
|                | 1.20   | 1.22   | 0.05    |        | 3.99    | 4.06    | 0.06    |        | 0.49   | 0.55   | 0.36    |        |        |        |         |        |
| Yemen          | (0.76, | (0.96, | (-0.03, | 0.197  | (3.14,  | (3.56,  | (0.03,  | <0.001 | (0.23, | (0.37, | (0.24,  | <0.001 | —      | —      | —       | —      |
|                | 1.80)  | 1.54)  | 0.13)   |        | 4.99)   | 4.62)   | 0.09)   |        | 0.92)  | 0.77)  | 0.48)   |        |        |        |         |        |
|                | 0.77   | 0.78   | 0.05    |        | 2.57    | 2.59    | 0.03    |        | 0.83   | 0.89   | 0.21    |        | 0.01   | 0.01   | 0.00    |        |
| Zambia         | (0.33, | (0.50, | (-0.04, | 0.283  | (1.66,  | (2.04,  | (-0.03, | 0.336  | (0.37, | (0.59, | (0.06,  | 0.006  | (0.00, | (0.00, | (0.00,  | <0.001 |
|                | 1.56)  | 1.17)  | 0.15)   |        | 3.80)   | 3.25)   | 0.09)   |        | 1.63)  | 1.30)  | 0.36)   |        | 0.42)  | 0.15)  | 0.00)*  |        |
|                | 1.22   | 1.23   | 0.05    |        | 4.06    | 4.07    | 0.02    |        | 0.56   | 0.61   | 0.31    |        |        |        |         |        |
| Zimbabwe       | (0.73, | (0.85, | (-0.01, | 0.076  | (3.09,  | (3.36,  | (-0.04, | 0.600  | (0.24, | (0.36, | (0.06,  | 0.015  | —      | —      | —       | —      |
|                | 1.94)  | 1.71)  | 0.10)   |        | 5.24)   | 4.89)   | 0.07)   |        | 1.09)  | 0.97)  | 0.55)   |        |        |        |         |        |
| <b>Men</b>     |        |        |         |        |         |         |         |        |        |        |         |        |        |        |         |        |
|                | 2.03   | 2.15   | 0.18    |        | 6.75    | 7.14    | 0.18    |        | 0.80   | 0.83   | 0.24    |        |        |        |         |        |
| Afghanistan    | (1.25, | (1.76, | (0.11,  | <0.001 | (5.27,  | (6.40,  | (0.15,  | <0.001 | (0.35, | (0.59, | (0.18,  | <0.001 | —      | —      | —       | —      |
|                | 3.15)  | 2.60)  | 0.26)   |        | 8.54)   | 7.93)   | 0.22)   |        | 1.60)  | 1.13)  | 0.30)   |        |        |        |         |        |
|                | 4.52   | 4.65   | 0.10    |        | 14.98   | 15.44   | 0.10    |        | 1.51   | 1.60   | 0.25    |        |        | 0.01   |         |        |
| Albania        | (3.01, | (2.89, | (0.05,  | <0.001 | (12.08, | (12.02, | (0.06,  | <0.001 | (0.70, | (0.66, | (0.00,  | 0.046  | —      | (0.00, | —       | —      |
|                | 6.52)  | 7.10)  | 0.15)   |        | 18.38)  | 19.53)  | 0.14)   |        | 2.84)  | 3.27)  | 0.49)   |        |        | 0.85)  |         |        |
|                | 2.14   | 2.17   | 0.03    |        | 7.10    | 7.19    | 0.03    |        | 0.94   | 0.93   | -0.04   |        | 0.01   | 0.01   | 0.00    |        |
| Algeria        | (1.70, | (1.88, | (-0.04, | 0.351  | (6.27,  | (6.67,  | (0.01,  | 0.004  | (0.66, | (0.75, | (-0.11, | 0.169  | (0.00, | (0.00, | (-0.00, | 1.000  |
|                | 2.66)  | 2.48)  | 0.10)   |        | 8.02)   | 7.75)   | 0.06)   |        | 1.31)  | 1.15)  | 0.02)   |        | 0.11)  | 0.06)  | 0.00)   |        |
|                | 2.71   | 2.81   | 0.10    |        | 9.00    | 9.32    | 0.10    |        | 4.78   | 5.74   | 0.63    |        | 0.07   | 0.09   | 0.87    |        |
| American Samoa | (0.00, | (0.00, | (-0.01, | 0.064  | (0.07,  | (0.09,  | (-0.01, | 0.065  | (0.00, | (0.00, | (0.38,  | <0.001 | (0.00, | (0.00, | (0.49,  | <0.001 |
|                | 50.81) | 53.26) | 0.20)   |        | 62.59)  | 65.02)  | 0.20)   |        | 54.64) | 58.87) | 0.88)   |        | 45.53) | 47.95) | 1.24)   |        |
| Andorra        | 6.04   | 5.24   | -0.48   | <0.001 | 20.06   | 17.41   | -0.48   | <0.001 | 2.27   | 2.12   | -0.26   | <0.001 | 0.01   | 0.01   | 0.00    | <0.001 |

|                     |               |               |                |        |                |                |                |        |               |               |                |        |               |               |               |
|---------------------|---------------|---------------|----------------|--------|----------------|----------------|----------------|--------|---------------|---------------|----------------|--------|---------------|---------------|---------------|
|                     | (0.11, 48.14) | (0.09, 44.97) | (-0.56, -0.40) |        | (4.10, 68.35)  | (3.71, 61.56)  | (-0.55, -0.42) |        | (0.00, 42.58) | (0.00, 40.51) | (-0.34, -0.19) |        | (0.00, 39.17) | (0.00, 37.54) | (0.00, 0.00)* |
|                     | 1.59          | 1.68          | 0.19           |        | 5.27           | 5.58           | 0.19           |        | 0.87          | 0.99          | 0.46           |        | 0.01          | 0.01          | 0.00          |
| Angola              | (1.03, 2.34)  | (1.31, 2.13)  | (0.14, 0.24)   | <0.001 | (4.20, 6.52)   | (4.87, 6.36)   | (0.17, 0.22)   | <0.001 | (0.48, 1.46)  | (0.71, 1.34)  | (0.27, 0.64)   | <0.001 | (0.00, 0.25)  | (0.00, 0.11)  | (0.00, 0.00)* |
|                     | 1.19          | 1.23          | 0.12           |        | 3.96           | 4.07           | 0.10           |        | 1.57          | 1.34          | -0.25          |        | 0.02          | 0.02          | -0.02         |
| Antigua and Barbuda | (0.00, 37.54) | (0.00, 25.48) | (0.04, 0.20)   | 0.002  | (0.00, 42.93)  | (0.03, 30.58)  | (0.07, 0.13)   | <0.001 | (0.00, 38.23) | (0.00, 25.71) | (-1.05, 0.56)  | 0.547  | (0.00, 35.18) | (0.00, 23.16) | (-0.46, 0.42) |
|                     | 2.85          | 2.95          | 0.12           |        | 9.47           | 9.81           | 0.13           |        | 1.39          | 1.36          | -0.04          |        | 0.01          | 0.01          | 0.00          |
| Argentina           | (2.44, 3.32)  | (2.61, 3.34)  | (0.07, 0.16)   | <0.001 | (8.70, 10.28)  | (9.17, 10.48)  | (0.07, 0.18)   | <0.001 | (1.11, 1.73)  | (1.13, 1.63)  | (-0.30, 0.22)  | 0.760  | (0.00, 0.08)  | (0.00, 0.06)  | (0.00, 0.00)* |
|                     | 3.96          | 4.18          | 0.18           |        | 13.14          | 13.88          | 0.19           |        | 1.30          | 1.44          | 0.38           |        |               |               |               |
| Armenia             | (2.60, 5.79)  | (2.76, 6.22)  | (0.15, 0.21)   | <0.001 | (10.51, 16.24) | (11.16, 17.18) | (0.18, 0.20)   | <0.001 | (0.58, 2.51)  | (0.67, 2.87)  | (0.13, 0.62)   | 0.003  | —             | —             | —             |
|                     | 7.05          | 6.58          | -0.23          |        | 23.39          | 21.85          | -0.22          |        | 2.34          | 2.22          | -0.11          |        | 0.01          | 0.01          | 0.00          |
| Australia           | (6.20, 7.97)  | (5.87, 7.36)  | (-0.27, -0.19) | <0.001 | (21.83, 25.03) | (20.55, 23.23) | (-0.26, -0.19) | <0.001 | (1.87, 2.91)  | (1.81, 2.69)  | (-0.43, 0.22)  | 0.514  | (0.00, 0.13)  | (0.00, 0.12)  | (0.00, 0.00)* |
|                     | 6.17          | 6.51          | 0.22           |        | 20.47          | 21.63          | 0.22           |        | 2.13          | 2.25          | 0.22           |        | 0.01          | 0.01          | 0.00          |
| Austria             | (4.97, 7.58)  | (5.35, 7.90)  | (0.07, 0.36)   | 0.003  | (18.22, 22.94) | (19.45, 24.01) | (0.07, 0.37)   | 0.004  | (1.45, 3.04)  | (1.59, 3.14)  | (-0.22, 0.67)  | 0.324  | (0.00, 0.32)  | (0.00, 0.35)  | (0.00, 0.00)* |
|                     | 3.94          | 4.11          | 0.14           |        | 13.07          | 13.64          | 0.15           |        | 1.29          | 1.35          | 0.12           |        |               |               |               |
| Azerbaijan          | (2.92, 5.21)  | (3.34, 5.03)  | (0.12, 0.17)   | <0.001 | (11.12, 15.28) | (12.19, 15.24) | (0.14, 0.16)   | <0.001 | (0.73, 2.10)  | (0.92, 1.94)  | (-0.04, 0.28)  | 0.146  | —             | —             | —             |
|                     | 1.24          | 1.24          | -0.00          |        | 4.10           | 4.13           | 0.02           |        | 2.07          | 2.81          | 0.92           |        | 0.03          | 0.04          | 0.85          |
| Bahamas             | (0.00, 10.47) | (0.02, 7.59)  | (-0.09, 0.09)  | 0.976  | (0.46, 15.35)  | (0.88, 12.12)  | (-0.03, 0.07)  | 0.414  | (0.06, 11.86) | (0.36, 10.16) | (-0.14, 2.00)  | 0.090  | (0.00, 8.18)  | (0.00, 5.41)  | (-0.88, 2.62) |
|                     | 2.29          | 2.28          | -0.02          |        | 7.60           | 7.56           | -0.01          |        | 0.89          | 0.91          | 0.09           |        |               |               |               |
| Bahrain             | (0.66, 7.32)  | (1.30, 4.45)  | (-0.07, 0.04)  | 0.544  | (4.14, 14.00)  | (5.75, 10.36)  | (-0.06, 0.03)  | 0.530  | (0.08, 5.52)  | (0.35, 2.84)  | (-0.14, 0.33)  | 0.430  | —             | —             | —             |
|                     | 2.21          | 2.17          | -0.07          |        | 7.34           | 7.21           | -0.06          |        | 0.89          | 1.00          | 0.37           |        |               | 0.01          |               |
| Bangladesh          | (1.99, 2.45)  | (2.01, 2.34)  | (-0.13, -0.01) | 0.019  | (6.93, 7.76)   | (6.91, 7.52)   | (-0.08, -0.05) | <0.001 | (0.75, 1.04)  | (0.89, 1.12)  | (-0.03, 0.77)  | 0.073  | —             | (0.00, 0.02)  | —             |
|                     | 1.21          | 1.27          | 0.17           | <0.001 | 4.03           | 4.22           | 0.17           | <0.001 | 1.49          | 1.40          | -0.42          | 0.478  | 0.02          | 0.02          | -0.43         |
| Barbados            |               |               |                |        |                |                |                |        |               |               |                |        |               |               | 0.060         |

|                          |               |               |                |        |                |                |                |        |               |               |                |              |               |               |                |        |
|--------------------------|---------------|---------------|----------------|--------|----------------|----------------|----------------|--------|---------------|---------------|----------------|--------------|---------------|---------------|----------------|--------|
|                          | (0.00, 9.54)  | (0.01, 10.29) | (0.10, 0.23)   |        | (0.52, 14.27)  | (0.62, 14.97)  | (0.12, 0.21)   |        | (0.02, 10.01) | (0.01, 10.54) | (-1.56, 0.74)  | (0.00, 7.25) | (0.00, 8.05)  | (-0.87, 0.02) |                |        |
|                          | 5.14          | 5.63          | 0.32           |        | 17.05          | 18.69          | 0.32           |        | 1.61          | 1.84          | 0.43           |              |               |               |                |        |
| Belarus                  | (4.22, 6.21)  | (4.65, 6.82)  | (0.30, 0.34)   | <0.001 | (15.34, 18.92) | (16.86, 20.71) | (0.30, 0.33)   | <0.001 | (1.12, 2.27)  | (1.30, 2.60)  | (0.38, 0.48)   | <0.001       | —             | —             | —              | —      |
|                          | 5.32          | 5.93          | 0.39           |        | 17.66          | 19.70          | 0.39           |        | 2.37          | 2.40          | 0.02           |              | 0.02          | 0.01          | -2.35          |        |
| Belgium                  | (4.37, 6.43)  | (4.92, 7.12)  | (0.31, 0.48)   | <0.001 | (15.90, 19.59) | (17.83, 21.74) | (0.32, 0.47)   | <0.001 | (1.75, 3.15)  | (1.78, 3.20)  | (-0.10, 0.14)  | 0.781        | (0.00, 0.26)  | (0.00, 0.28)  | (-6.36, 1.83)  | 0.266  |
|                          | 1.19          | 1.28          | 0.25           |        | 3.96           | 4.25           | 0.25           |        | 1.07          | 1.80          | 1.65           |              | 0.01          | 0.03          | 1.50           |        |
| Belize                   | (0.00, 16.61) | (0.03, 7.30)  | (0.14, 0.36)   | <0.001 | (0.12, 21.63)  | (0.94, 12.02)  | (0.21, 0.29)   | <0.001 | (0.00, 16.33) | (0.11, 8.16)  | (0.29, 3.02)   | 0.017        | (0.00, 14.30) | (0.00, 4.95)  | (0.24, 2.77)   | 0.019  |
|                          | 1.68          | 1.74          | 0.12           |        | 5.58           | 5.77           | 0.12           |        | 0.70          | 0.75          | 0.26           |              |               |               |                |        |
| Benin                    | (0.81, 3.08)  | (1.18, 2.48)  | (0.03, 0.20)   | 0.006  | (3.85, 7.82)   | (4.69, 7.03)   | (0.07, 0.16)   | <0.001 | (0.20, 1.76)  | (0.40, 1.29)  | (0.17, 0.36)   | <0.001       | —             | —             | —              | —      |
|                          | 1.30          | 1.28          | -0.06          |        | 4.30           | 4.26           | -0.04          |        | 1.14          | 0.86          | -1.16          |              | 0.01          | 0.01          | 0.00           |        |
| Bermuda                  | (0.00, 41.83) | (0.00, 54.07) | (-0.16, 0.04)  | 0.257  | (0.02, 46.37)  | (0.01, 58.30)  | (-0.08, -0.00) | 0.029  | (0.00, 41.58) | (0.00, 53.47) | (-1.32, -1.01) | <0.001       | (0.00, 39.88) | (0.00, 52.20) | (0.00, 0.00)*  | <0.001 |
|                          | 2.29          | 2.23          | -0.09          |        | 7.59           | 7.41           | -0.08          |        | 0.85          | 0.90          | 0.21           |              |               |               |                |        |
| Bhutan                   | (0.32, 7.95)  | (0.61, 5.83)  | (-0.11, -0.06) | <0.001 | (3.09, 15.57)  | (3.96, 12.71)  | (-0.10, -0.07) | <0.001 | (0.01, 5.59)  | (0.07, 3.82)  | (0.08, 0.35)   | 0.002        | —             | —             | —              | —      |
| Bolivia                  | 0.44          | 0.46          | 0.14           |        | 1.45           | 1.51           | 0.16           |        | 1.25          | 1.02          | -0.68          |              | 0.02          | 0.02          | 0.00           |        |
| (Plurinational State of) | (0.13, 1.08)  | (0.22, 0.84)  | (-0.03, 0.31)  | 0.098  | (0.80, 2.42)   | (1.04, 2.12)   | (0.09, 0.23)   | <0.001 | (0.65, 2.16)  | (0.64, 1.53)  | (-0.92, -0.44) | <0.001       | (0.00, 0.42)  | (0.00, 0.20)  | (0.00, 0.00)*  | <0.001 |
|                          | 4.92          | 4.89          | -0.01          |        | 16.32          | 16.23          | -0.01          |        | 2.41          | 2.40          | -0.13          |              | 0.02          | 0.02          | 0.00           |        |
| Bosnia and Herzegovina   | (3.64, 6.50)  | (3.29, 7.09)  | (-0.07, 0.04)  | 0.680  | (13.91, 19.02) | (13.21, 19.83) | (-0.06, 0.04)  | 0.677  | (1.55, 3.59)  | (1.34, 4.09)  | (-0.28, 0.02)  | 0.087        | (0.00, 0.44)  | (0.00, 0.88)  | (0.00, 0.00)*  | <0.001 |
|                          | 1.70          | 1.76          | 0.13           |        | 5.63           | 5.85           | 0.14           |        | 1.23          | 1.35          | 0.32           |              | 0.01          | 0.02          | 2.94           |        |
| Botswana                 | (0.34, 5.07)  | (0.84, 3.30)  | (0.05, 0.21)   | 0.002  | (2.64, 10.52)  | (4.02, 8.27)   | (0.08, 0.20)   | <0.001 | (0.16, 4.35)  | (0.56, 2.76)  | (-0.03, 0.66)  | 0.073        | (0.00, 2.24)  | (0.00, 0.78)  | (2.94, 2.94)   | <0.001 |
|                          | 1.90          | 1.90          | 0.11           |        | 6.30           | 6.31           | 0.11           |        | 1.46          | 1.44          | 0.01           |              | 0.02          | 0.02          | -0.02          |        |
| Brazil                   | (1.74, 2.07)  | (1.78, 2.03)  | (0.02, 0.20)   | 0.019  | (6.00, 6.61)   | (6.09, 6.54)   | (0.03, 0.19)   | 0.009  | (1.32, 1.62)  | (1.34, 1.56)  | (-0.25, 0.27)  | 0.941        | (0.01, 0.04)  | (0.01, 0.03)  | (-0.02, -0.02) | <0.001 |
| Brunei Darussalam        | 5.38          | 5.09          | -0.20          | <0.001 | 17.86          | 16.89          | -0.20          | <0.001 | 2.88          | 2.58          | -0.40          | 0.189        | 0.02          | 0.02          | -0.98          | 0.227  |

|                             |                  |                  |                   |        |                   |                   |                   |        |                  |                 |                   |                 |                  |                  |                  |        |
|-----------------------------|------------------|------------------|-------------------|--------|-------------------|-------------------|-------------------|--------|------------------|-----------------|-------------------|-----------------|------------------|------------------|------------------|--------|
|                             | (1.31,<br>15.05) | (1.92,<br>11.55) | (-0.24,<br>-0.16) |        | (9.08,<br>31.86)  | (10.43,<br>26.38) | (-0.24,<br>-0.16) |        | (0.32,<br>11.27) | (0.57,<br>8.10) | (-0.99,<br>0.20)  | (0.00,<br>6.47) | (0.00,<br>4.23)  | (-2.55,<br>0.62) |                  |        |
|                             | 4.90             | 4.76             | -0.10             |        | 16.28             | 15.81             | -0.10             |        | 2.25             | 2.51            | 0.40              | 0.02            | 0.02             | 0.00             |                  |        |
| Bulgaria                    | (3.90,<br>6.11)  | (3.67,<br>6.15)  | (-0.13,<br>-0.07) | <0.001 | (14.41,<br>18.34) | (13.78,<br>18.12) | (-0.13,<br>-0.08) | <0.001 | (1.59,<br>3.10)  | (1.74,<br>3.59) | (0.10,<br>0.70)   | 0.009           | (0.00,<br>0.29)  | (0.00,<br>0.53)  | (0.00,<br>0.00)* | 0.022  |
|                             | 1.70             | 1.73             | 0.07              |        | 5.64              | 5.75              | 0.08              |        | 0.65             | 0.72            | 0.42              |                 |                  |                  |                  |        |
| Burkina Faso                | (1.00,<br>2.71)  | (1.30,<br>2.26)  | (0.03,<br>0.11)   | 0.001  | (4.27,<br>7.31)   | (4.94,<br>6.66)   | (0.06,<br>0.11)   | <0.001 | (0.25,<br>1.37)  | (0.45,<br>1.08) | (0.29,<br>0.55)   | <0.001          | —                | —                | —                | —      |
|                             | 1.18             | 1.19             | 0.05              |        | 3.90              | 3.94              | 0.04              |        | 0.96             | 0.83            | -0.50             |                 | 0.01             | 0.01             | 0.00             |        |
| Burundi                     | (0.55,<br>2.22)  | (0.75,<br>1.79)  | (-0.08,<br>0.18)  | 0.428  | (2.64,<br>5.56)   | (3.10,<br>4.94)   | (-0.06,<br>0.14)  | 0.385  | (0.40,<br>1.93)  | (0.47,<br>1.35) | (-0.64,<br>-0.35) | <0.001          | (0.00,<br>0.51)  | (0.00,<br>0.21)  | (0.00,<br>0.00)* | 0.014  |
|                             | 1.74             | 1.82             | 0.17              |        | 5.78              | 6.02              | 0.15              |        | 0.82             | 0.72            | -0.50             |                 | 0.01             |                  |                  |        |
| Cabo Verde                  | (0.00,<br>15.41) | (0.28,<br>6.23)  | (0.12,<br>0.22)   | <0.001 | (0.61,<br>22.31)  | (2.55,<br>12.17)  | (0.12,<br>0.17)   | <0.001 | (0.00,<br>13.74) | (0.01,<br>4.48) | (-0.77,<br>-0.23) | <0.001          | (0.00,<br>12.19) | —                | —                | —      |
|                             | 2.51             | 2.65             | 0.19              |        | 8.32              | 8.80              | 0.19              |        | 1.19             | 1.32            | 0.37              |                 | 0.01             | 0.01             | 0.00             |        |
| Cambodia                    | (1.70,<br>3.57)  | (2.13,<br>3.27)  | (0.17,<br>0.21)   | <0.001 | (6.77,<br>10.12)  | (7.81,<br>9.87)   | (0.17,<br>0.21)   | <0.001 | (0.66,<br>1.99)  | (0.96,<br>1.77) | (0.28,<br>0.46)   | <0.001          | (0.00,<br>0.34)  | (0.00,<br>0.14)  | (0.00,<br>0.00)* | <0.001 |
|                             | 1.70             | 1.81             | 0.23              |        | 5.63              | 6.00              | 0.23              |        | 0.68             | 0.81            | 0.61              |                 |                  | 0.01             |                  |        |
| Cameroon                    | (1.08,<br>2.54)  | (1.45,<br>2.24)  | (0.11,<br>0.35)   | <0.001 | (4.43,<br>7.05)   | (5.32,<br>6.75)   | (0.17,<br>0.29)   | <0.001 | (0.32,<br>1.29)  | (0.57,<br>1.11) | (0.53,<br>0.68)   | <0.001          | —                | (0.00,<br>0.09)  | —                | —      |
|                             | 7.77             | 7.64             | -0.05             |        | 25.79             | 25.36             | -0.04             |        | 2.57             | 2.52            | -0.10             |                 | 0.01             | 0.01             | 0.00             |        |
| Canada                      | (7.09,<br>8.50)  | (6.98,<br>8.34)  | (-0.11,<br>0.02)  | 0.163  | (24.55,<br>27.08) | (24.16,<br>26.60) | (-0.11,<br>0.02)  | 0.184  | (2.18,<br>3.00)  | (2.15,<br>2.94) | (-0.12,<br>-0.07) | <0.001          | (0.00,<br>0.09)  | (0.00,<br>0.09)  | (0.00,<br>0.00)* | <0.001 |
|                             | 1.61             | 1.65             | 0.08              |        | 5.35              | 5.49              | 0.09              |        | 0.87             | 0.89            | -0.00             |                 | 0.01             | 0.01             | 0.00             |        |
| Central African<br>Republic | (0.60,<br>3.52)  | (0.88,<br>2.83)  | (0.01,<br>0.16)   | 0.023  | (3.26,<br>8.31)   | (3.97,<br>7.40)   | (0.07,<br>0.10)   | <0.001 | (0.20,<br>2.48)  | (0.36,<br>1.83) | (-0.10,<br>0.10)  | 0.963           | (0.00,<br>1.04)  | (0.00,<br>0.49)  | (0.00,<br>0.00)* | <0.001 |
|                             | 1.65             | 1.71             | 0.13              |        | 5.47              | 5.66              | 0.12              |        | 0.63             | 0.70            | 0.45              |                 |                  |                  |                  |        |
| Chad                        | (0.86,<br>2.87)  | (1.17,<br>2.41)  | (0.04,<br>0.22)   | 0.004  | (3.91,<br>7.45)   | (4.63,<br>6.86)   | (0.10,<br>0.15)   | <0.001 | (0.19,<br>1.52)  | (0.37,<br>1.20) | (0.35,<br>0.55)   | <0.001          | —                | —                | —                | —      |
|                             | 3.11             | 3.22             | 0.11              |        | 10.31             | 10.69             | 0.11              |        | 1.55             | 1.61            | 0.12              |                 | 0.01             | 0.01             | 0.00             |        |
| Chile                       | (2.45,<br>3.88)  | (2.66,<br>3.87)  | (0.02,<br>0.19)   | 0.011  | (9.07,<br>11.67)  | (9.65,<br>11.83)  | (0.02,<br>0.20)   | 0.022  | (1.10,<br>2.13)  | (1.22,<br>2.09) | (-0.11,<br>0.35)  | 0.316           | (0.00,<br>0.18)  | (0.00,<br>0.15)  | (0.00,<br>0.00)* | <0.001 |
| China                       | 2.45             | 2.57             | 0.16              | 0.001  | 8.12              | 8.53              | 0.17              | <0.001 | 0.95             | 0.96            | 0.01              | 0.935           | —                | —                | —                | —      |

|               |         |         |          |        |         |         |         |        |         |         |         |        |         |         |        |        |
|---------------|---------|---------|----------|--------|---------|---------|---------|--------|---------|---------|---------|--------|---------|---------|--------|--------|
|               | (2.39,  | (2.51,  | (0.06,   |        | (8.01,  | (8.43,  | (0.11,  |        | (0.92,  | (0.93,  | (-0.16, |        |         |         |        |        |
|               | 2.51)   | 2.63)   | 0.26)    |        | 8.23)   | 8.64)   | 0.23)   |        | 0.99)   | 1.00)   | 0.18)   |        |         |         |        |        |
|               | 1.24    | 1.25    | 0.04     |        | 4.11    | 4.16    | 0.06    |        | 0.97    | 0.87    | -0.41   |        | 0.01    | 0.01    | 0.00   |        |
| Colombia      | (0.97,  | (1.04,  | (-0.07,  | 0.503  | (3.60,  | (3.75,  | (0.02,  | 0.001  | (0.73,  | (0.69,  | (-0.48, | <0.001 | (0.00,  | (0.00,  | (0.00, | <0.001 |
|               | 1.57)   | 1.50)   | 0.15)    |        | 4.68)   | 4.59)   | 0.09)   |        | 1.26)   | 1.08)   | -0.34)  |        | 0.09)   | 0.06)   | 0.00)* |        |
|               | 1.11    | 1.15    | 0.14     |        | 3.67    | 3.81    | 0.13    |        | 0.84    | 0.83    | -0.03   |        | 0.01    | 0.01    | 0.00   |        |
| Comoros       | (0.00,  | (0.08,  | (0.03,   | 0.015  | (0.47,  | (1.24,  | (0.11,  | <0.001 | (0.00,  | (0.03,  | (-0.96, | 0.954  | (0.00,  | (0.00,  | (0.00, | 0.020  |
|               | 8.80)   | 4.90)   | 0.24)    |        | 13.12)  | 8.89)   | 0.15)   |        | 8.31)   | 4.37)   | 0.91)   |        | 6.70)   | 2.85)   | 0.00)* |        |
|               | 1.64    | 1.68    | 0.08     |        | 5.44    | 5.57    | 0.09    |        | 1.12    | 0.99    | -0.36   |        | 0.01    | 0.01    | 0.00   |        |
| Congo         | (0.56,  | (0.97,  | (0.01,   | 0.027  | (3.20,  | (4.19,  | (0.05,  | <0.001 | (0.28,  | (0.47,  | (-0.71, | 0.049  | (0.00,  | (0.00,  | (0.00, | <0.001 |
|               | 3.73)   | 2.72)   | 0.16)    |        | 8.65)   | 7.26)   | 0.13)   |        | 3.00)   | 1.84)   | -0.00)  |        | 1.19)   | 0.41)   | 0.00)* |        |
|               | 2.64    | 2.70    | 0.07     |        | 8.75    | 8.95    | 0.07    |        | 5.52    | 6.25    | 0.43    |        | 0.09    | 0.10    | 0.68   |        |
| Cook Islands  | (0.00,  | (0.00,  | (0.01,   | 0.019  | (0.00,  | (0.00,  | (0.03,  | <0.001 | (0.00,  | (0.00,  | (0.34,  | <0.001 | (0.00,  | (0.00,  | (0.28, | 0.001  |
|               | 126.19) | 149.34) | 0.13)    |        | 137.28) | 161.64) | 0.11)   |        | 131.88) | 156.52) | 0.53)   |        | 121.33) | 144.06) | 1.08)  |        |
|               | 1.26    | 1.28    | 0.06     |        | 4.18    | 4.26    | 0.07    |        | 0.58    | 0.62    | 0.27    |        |         |         |        |        |
| Costa Rica    | (0.50,  | (0.67,  | (-0.01,  | 0.110  | (2.62,  | (3.05,  | (0.05,  | <0.001 | (0.13,  | (0.23,  | (0.17,  | <0.001 | —       | —       | —      | —      |
|               | 2.64)   | 2.26)   | 0.13)    |        | 6.33)   | 5.81)   | 0.10)   |        | 1.68)   | 1.39)   | 0.37)   |        |         |         |        |        |
|               | 1.70    | 1.75    | 0.10     |        | 5.63    | 5.82    | 0.12    |        | 0.67    | 0.72    | 0.28    |        |         |         |        |        |
| Cote d'Ivoire | (1.16,  | (1.40,  | (0.05,   | <0.001 | (4.59,  | (5.16,  | (0.09,  | <0.001 | (0.35,  | (0.50,  | (0.10,  | 0.002  | —       | —       | —      | —      |
|               | 2.40)   | 2.17)   | 0.15)    |        | 6.83)   | 6.54)   | 0.14)   |        | 1.17)   | 1.00)   | 0.46)   |        |         |         |        |        |
|               | 4.56    | 4.65    | 0.07     |        | 15.13   | 15.43   | 0.07    |        | 1.79    | 1.67    | -0.24   |        | 0.01    | 0.01    | 0.00   |        |
| Croatia       | (3.37,  | (3.29,  | (0.02,   | 0.003  | (12.90, | (12.88, | (0.03,  | 0.002  | (1.08,  | (0.91,  | (-0.39, | 0.002  | (0.00,  | (0.00,  | (0.00, | <0.001 |
|               | 6.07)   | 6.50)   | 0.11)    |        | 17.67)  | 18.44)  | 0.11)   |        | 2.83)   | 2.96)   | -0.08)  |        | 0.48)   | 0.75)   | 0.00)* |        |
|               | 1.21    | 1.25    | 0.1021   |        | 4.02    | 4.14    | 0.11    |        | 1.05    | 0.92    | -0.49   |        | 0.01    | 0.01    | 0.00   |        |
| Cuba          | (0.77,  | (0.80,  | (0.1017, | <0.001 | (3.18,  | (3.28,  | (0.03,  | 0.010  | (0.64,  | (0.54,  | (-0.86, | 0.010  | (0.00,  | (0.00,  | (0.00, | <0.001 |
|               | 1.81)   | 1.87)   | 0.1025)  |        | 5.02)   | 5.17)   | 0.19)   |        | 1.61)   | 1.46)   | -0.12)  |        | 0.21)   | 0.25)   | 0.00)* |        |
|               | 5.66    | 5.08    | -0.37    |        | 18.77   | 16.87   | -0.37   |        | 1.92    | 1.74    | -0.36   |        | 0.01    | 0.01    |        |        |
| Cyprus        | (2.58,  | (2.93,  | (-0.47,  | <0.001 | (12.61, | (12.70, | (-0.45, | <0.001 | (0.40,  | (0.61,  | (-0.58, | 0.001  | (0.00,  | (0.00,  | —      | —      |
|               | 10.86)  | 8.81)   | -0.28)   |        | 26.96)  | 22.47)  | -0.28)  |        | 5.73)   | 4.65)   | -0.14)  |        | 2.57)   | 2.40)   |        |        |
|               | 5.19    | 5.26    | 0.06     |        | 17.21   | 17.46   | 0.07    |        | 1.76    | 1.70    | -0.05   |        | 0.01    |         |        |        |
| Czechia       | (4.27,  | (4.32,  | (0.01,   | 0.015  | (15.53, | (15.73, | (0.02,  | 0.008  | (1.24,  | (1.19,  | (-0.24, | 0.649  | (0.00,  | —       | —      | —      |
|               | 6.26)   | 6.40)   | 0.12)    |        | 19.05)  | 19.38)  | 0.12)   |        | 2.43)   | 2.42)   | 0.15)   |        | 0.23)   |         |        |        |
| Democratic    | 2.60    | 2.60    | 0.00     | 0.873  | 8.63    | 8.63    | 0.00    | 0.766  | 0.98    | 1.00    | 0.13    | 0.002  | —       | —       | —      | —      |

|                                  |               |               |                |        |                |                |                |        |               |               |                |        |               |               |               |        |
|----------------------------------|---------------|---------------|----------------|--------|----------------|----------------|----------------|--------|---------------|---------------|----------------|--------|---------------|---------------|---------------|--------|
| People's Republic of Korea       | (2.10, 3.19)  | (2.20, 3.06)  | (-0.05, 0.05)  |        | (7.68, 9.66)   | (7.90, 9.43)   | (-0.02, 0.02)  |        | (0.68, 1.37)  | (0.76, 1.31)  | (0.05, 0.21)   |        |               |               |               |        |
| Democratic Republic of the Congo | 1.61          | 1.61          | 0.00           |        | 5.33           | 5.34           | 0.01           |        | 0.97          | 0.97          | 0.10           |        | 0.01          | 0.01          | 0.00          |        |
|                                  | (1.28, 1.99)  | (1.40, 1.84)  | (-0.05, 0.05)  | 0.986  | (4.71, 6.00)   | (4.96, 5.75)   | (-0.01, 0.03)  | 0.229  | (0.72, 1.28)  | (0.81, 1.15)  | (0.01, 0.18)   | 0.035  | (0.00, 0.09)  | (0.00, 0.05)  | (-0.00, 0.00) | 1.000  |
|                                  | 5.79          | 4.96          | -0.53          |        | 19.21          | 16.47          | -0.52          |        | 2.35          | 1.93          | -0.70          |        | 0.01          | 0.01          | 0.00          |        |
| Denmark                          | (4.41, 7.48)  | (3.64, 6.64)  | (-0.56, -0.49) | <0.001 | (16.64, 22.09) | (13.97, 19.32) | (-0.56, -0.49) | <0.001 | (1.51, 3.51)  | (1.15, 3.08)  | (-0.87, -0.53) | <0.001 | (0.00, 0.46)  | (0.00, 0.48)  | (0.00, 0.00)* | <0.001 |
|                                  | 1.10          | 1.15          | 0.16           |        | 3.64           | 3.82           | 0.17           |        | 0.94          | 0.93          | -0.02          |        | 0.01          | 0.01          | 0.00          |        |
| Djibouti                         | (0.02, 6.95)  | (0.23, 3.40)  | (0.05, 0.27)   | 0.006  | (0.69, 11.07)  | (1.81, 7.08)   | (0.14, 0.21)   | <0.001 | (0.01, 6.66)  | (0.14, 3.05)  | (-0.53, 0.50)  | 0.942  | (0.00, 4.91)  | (0.00, 1.47)  | (0.00, 0.00)* | <0.001 |
|                                  | 1.21          | 1.26          | 0.14           |        | 4.03           | 4.19           | 0.13           |        | 1.85          | 1.85          | 0.01           |        | 0.03          | 0.03          | 0.00          |        |
| Dominica                         | (0.00, 33.87) | (0.00, 31.35) | (0.08, 0.20)   | <0.001 | (0.00, 39.31)  | (0.01, 36.97)  | (0.05, 0.21)   | 0.001  | (0.00, 35.07) | (0.00, 32.50) | (-0.51, 0.53)  | 0.975  | (0.00, 31.47) | (0.00, 28.83) | (0.00, 0.00)* | 0.002  |
|                                  | 1.20          | 1.26          | 0.17           |        | 3.99           | 4.18           | 0.16           |        | 0.86          | 0.94          | 0.32           |        | 0.01          | 0.01          | 0.00          |        |
| Dominican Republic               | (0.65, 2.05)  | (0.83, 1.83)  | (0.06, 0.27)   | 0.002  | (2.90, 5.37)   | (3.36, 5.13)   | (0.11, 0.20)   | <0.001 | (0.41, 1.61)  | (0.58, 1.44)  | (0.10, 0.55)   | 0.005  | (0.00, 0.36)  | (0.00, 0.19)  | (0.00, 0.00)* | <0.001 |
|                                  | 0.33          | 0.48          | 1.26           |        | 1.08           | 1.59           | 1.31           |        | 1.49          | 1.79          | 0.55           |        | 0.03          | 0.03          | 0.00          |        |
| Ecuador                          | (0.11, 0.75)  | (0.27, 0.78)  | (0.86, 1.67)   | <0.001 | (0.63, 1.73)   | (1.19, 2.09)   | (0.89, 1.74)   | <0.001 | (0.96, 2.21)  | (1.36, 2.31)  | (0.10, 1.00)   | 0.016  | (0.00, 0.28)  | (0.00, 0.17)  | (0.00, 0.00)* | <0.001 |
|                                  | 2.12          | 2.22          | 0.15           |        | 7.05           | 7.38           | 0.15           |        | 0.98          | 1.01          | 0.07           |        | 0.01          | 0.01          | 0.00          |        |
| Egypt                            | (1.84, 2.44)  | (2.02, 2.44)  | (0.10, 0.21)   | <0.001 | (6.52, 7.62)   | (7.01, 7.76)   | (0.14, 0.17)   | <0.001 | (0.79, 1.20)  | (0.88, 1.16)  | (0.01, 0.13)   | 0.016  | (0.00, 0.05)  | (0.00, 0.03)  | (0.00, 0.00)* | <0.001 |
|                                  | 1.18          | 1.22          | 0.12           |        | 3.93           | 4.04           | 0.11           |        | 0.91          | 0.94          | 0.18           |        | 0.01          | 0.01          | 0.00          |        |
| El Salvador                      | (0.53, 2.28)  | (0.63, 2.13)  | (0.01, 0.24)   | 0.037  | (2.62, 5.67)   | (2.88, 5.52)   | (0.05, 0.16)   | <0.001 | (0.36, 1.90)  | (0.44, 1.77)  | (-0.43, 0.80)  | 0.558  | (0.00, 0.54)  | (0.00, 0.40)  | (0.00, 0.00)* | <0.001 |
|                                  | 1.62          | 1.72          | 0.22           |        | 5.37           | 5.72           | 0.21           |        | 0.89          | 0.93          | 0.12           |        | 0.01          | 0.01          | 0.00          |        |
| Equatorial Guinea                | (0.02, 10.37) | (0.47, 4.46)  | (0.14, 0.29)   | <0.001 | (1.05, 16.31)  | (3.04, 9.81)   | (0.16, 0.26)   | <0.001 | (0.00, 9.07)  | (0.13, 3.28)  | (-0.07, 0.31)  | 0.201  | (0.00, 7.39)  | (0.00, 1.70)  | (0.00, 0.00)  | 0.122  |
|                                  | 1.08          | 1.10          | 0.07           |        | 3.58           | 3.66           | 0.08           |        | 0.89          | 1.02          | 0.45           |        | 0.01          | 0.01          | 0.00          |        |
| Eritrea                          | (0.32, 2.65)  | (0.59, 1.90)  | (-0.01, 0.15)  | 0.084  | (1.99, 5.95)   | (2.64, 4.95)   | (0.04, 0.13)   | 0.001  | (0.23, 2.38)  | (0.53, 1.79)  | (0.18, 0.72)   | 0.001  | (0.00, 0.94)  | (0.00, 0.35)  | (0.00, 0.00)* | <0.001 |
| Estonia                          | 5.02          | 5.49          | 0.31           | <0.001 | 16.66          | 18.24          | 0.31           | <0.001 | 1.58          | 1.76          | 0.37           | <0.001 | —             | —             | —             | —      |

|          |        |        |         |        |         |         |         |        |        |        |         |        |        |        |         |        |
|----------|--------|--------|---------|--------|---------|---------|---------|--------|--------|--------|---------|--------|--------|--------|---------|--------|
|          | (2.85, | (3.04, | (0.27,  |        | (12.45, | (13.45, | (0.28,  |        | (0.51, | (0.54, | (0.28,  |        |        |        |         |        |
|          | 8.29)  | 9.71)  | 0.35)   |        | 21.93)  | 24.63)  | 0.35)   |        | 3.84)  | 4.97)  | 0.45)   |        |        |        |         |        |
|          | 1.71   | 1.72   | 0.04    |        | 5.67    | 5.72    | 0.04    |        | 1.02   | 1.43   | 1.21    |        | 0.01   | 0.02   | 2.25    |        |
| Eswatini | (0.14, | (0.42, | (-0.04, | 0.361  | (1.90,  | (2.92,  | (0.01,  | 0.026  | (0.02, | (0.29, | (1.01,  | <0.001 | (0.00, | (0.00, | (2.25,  | <0.001 |
|          | 7.12)  | 4.67)  | 0.11)   |        | 13.04)  | 10.07)  | 0.08)   |        | 5.96)  | 4.23)  | 1.41)   |        | 4.07)  | 1.86)  | 2.25)   |        |
|          | 1.10   | 1.16   | 0.19    |        | 3.67    | 3.86    | 0.18    |        | 0.83   | 0.80   | -0.15   |        | 0.01   | 0.01   | 0.00    |        |
| Ethiopia | (0.87, | (1.00, | (0.13,  | <0.001 | (3.22,  | (3.56,  | (0.15,  | <0.001 | (0.63, | (0.67, | (-0.36, | 0.157  | (0.00, | (0.00, | (0.00,  | 0.044  |
|          | 1.39)  | 1.34)  | 0.26)   |        | 4.16)   | 4.18)   | 0.21)   |        | 1.08)  | 0.95)  | 0.06)   |        | 0.07)  | 0.04)  | 0.00)*  |        |
|          | 2.65   | 2.76   | 0.14    |        | 8.79    | 9.15    | 0.13    |        | 4.17   | 4.81   | 0.48    |        | 0.06   | 0.07   | 0.40    |        |
| Fiji     | (0.68, | (0.93, | (0.09,  | <0.001 | (4.56,  | (5.38,  | (0.11,  | <0.001 | (1.53, | (2.21, | (0.06,  | 0.024  | (0.00, | (0.00, | (-0.37, | 0.305  |
|          | 7.05)  | 6.38)  | 0.18)   |        | 15.33)  | 14.60)  | 0.15)   |        | 9.16)  | 9.15)  | 0.89)   |        | 2.84)  | 2.21)  | 1.18)   |        |
|          | 6.07   | 5.35   | -0.44   |        | 20.13   | 17.76   | -0.44   |        | 2.21   | 1.80   | -0.69   |        | 0.01   | 0.01   | 0.00    |        |
| Finland  | (4.71, | (4.02, | (-0.46, | <0.001 | (17.61, | (15.26, | (-0.45, | <0.001 | (1.43, | (1.07, | (-0.91, | <0.001 | (0.00, | (0.00, | (0.00,  | <0.001 |
|          | 7.76)  | 7.04)  | -0.42)  |        | 22.98)  | 20.59)  | -0.42)  |        | 3.34)  | 2.91)  | -0.48)  |        | 0.53)  | 0.54)  | 0.00)*  |        |
|          | 6.23   | 5.25   | -0.59   |        | 20.68   | 17.42   | -0.59   |        | 2.33   | 1.91   | -0.70   |        | 0.01   | 0.01   | 0.00    |        |
| France   | (5.79, | (4.83, | (-0.61, | <0.001 | (19.87, | (16.66, | (-0.61, | <0.001 | (2.07, | (1.66, | (-0.77, | <0.001 | (0.00, | (0.00, | (0.00,  | <0.001 |
|          | 6.69)  | 5.70)  | -0.56)  |        | 21.50)  | 18.22)  | -0.56)  |        | 2.62)  | 2.18)  | -0.62)  |        | 0.05)  | 0.05)  | 0.00)*  |        |
|          | 1.64   | 1.71   | 0.14    |        | 5.44    | 5.67    | 0.14    |        | 1.08   | 1.10   | 0.03    |        | 0.01   | 0.01   | 0.00    |        |
| Gabon    | (0.30, | (0.58, | (0.06,  | 0.001  | (2.47,  | (3.33,  | (0.10,  | <0.001 | (0.11, | (0.26, | (-0.15, | 0.738  | (0.00, | (0.00, | (0.00,  | <0.001 |
|          | 5.09)  | 3.91)  | 0.22)   |        | 10.40)  | 9.04)   | 0.18)   |        | 4.21)  | 3.04)  | 0.21)   |        | 2.31)  | 1.24)  | 0.00)*  |        |
|          | 1.70   | 1.77   | 0.15    |        | 5.65    | 5.87    | 0.14    |        | 0.64   | 0.74   | 0.51    |        |        |        |         |        |
| Gambia   | (0.25, | (0.66, | (0.09,  | <0.001 | (2.34,  | (3.59,  | (0.11,  | <0.001 | (0.01, | (0.13, | (0.28,  | <0.001 | —      | —      | —       | —      |
|          | 5.81)  | 3.85)  | 0.22)   |        | 11.46)  | 9.09)   | 0.16)   |        | 4.07)  | 2.37)  | 0.75)   |        |        |        |         |        |
|          | 4.09   | 4.30   | 0.16    |        | 13.58   | 14.28   | 0.17    |        | 1.74   | 2.27   | 0.85    |        | 0.01   | 0.02   | 2.38    |        |
| Georgia  | (2.95, | (2.90, | (0.14,  | <0.001 | (11.42, | (11.61, | (0.14,  | <0.001 | (1.03, | (1.30, | (0.58,  | <0.001 | (0.00, | (0.00, | (2.38,  | <0.001 |
|          | 5.53)  | 6.24)  | 0.19)   |        | 16.03)  | 17.45)  | 0.20)   |        | 2.76)  | 3.80)  | 1.11)   |        | 0.40)  | 0.80)  | 2.38)   |        |
|          | 6.79   | 5.78   | -0.53   |        | 22.53   | 19.20   | -0.52   |        | 3.34   | 2.67   | -0.78   |        | 0.03   | 0.02   | -1.35   |        |
| Germany  | (6.39, | (5.41, | (-0.56, | <0.001 | (21.80, | (18.52, | (-0.56, | <0.001 | (3.06, | (2.42, | (-1.10, | <0.001 | (0.01, | (0.00, | (-1.35, | <0.001 |
|          | 7.20)  | 6.18)  | -0.49)  |        | 23.28)  | 19.91)  | -0.49)  |        | 3.64)  | 2.94)  | -0.47)  |        | 0.07)  | 0.07)  | -1.35)  |        |
|          | 1.77   | 1.82   | 0.10    |        | 5.87    | 6.06    | 0.12    |        | 0.63   | 0.69   | 0.31    |        |        |        |         |        |
| Ghana    | (1.26, | (1.48, | (0.03,  | 0.009  | (4.90,  | (5.42,  | (0.09,  | <0.001 | (0.35, | (0.49, | (0.23,  | <0.001 | —      | —      | —       | —      |
|          | 2.42)  | 2.22)  | 0.18)   |        | 6.98)   | 6.75)   | 0.14)   |        | 1.06)  | 0.95)  | 0.40)   |        |        |        |         |        |
|          | 5.66   | 4.87   | -0.52   | <0.001 | 18.79   | 16.18   | -0.52   | <0.001 | 3.02   | 2.75   | -0.31   | 0.004  | 0.03   | 0.03   | -0.27   | 0.913  |

|               |        |        |         |        |         |         |         |        |        |        |         |        |        |         |         |        |
|---------------|--------|--------|---------|--------|---------|---------|---------|--------|--------|--------|---------|--------|--------|---------|---------|--------|
|               | (4.65, | (3.93, | (-0.54, |        | (16.92, | (14.45, | (-0.53, |        | (2.30, | (2.05, | (-0.52, | (0.00, | (0.00, | (-5.08, |         |        |
|               | 6.83)  | 6.01)  | -0.50)  |        | 20.82)  | 18.09)  | -0.51)  |        | 3.91)  | 3.64)  | -0.10)  | 0.25)  | 0.35)  | 4.77)   |         |        |
|               | 7.58   | 7.39   | -0.07   |        | 25.17   | 24.52   | -0.07   |        | 2.93   | 2.73   | -0.21   | 0.02   | 0.01   | -2.21   |         |        |
| Greenland     | (0.26, | (0.09, | (-0.13, | 0.015  | (6.26,  | (4.42,  | (-0.13, | 0.007  | (0.00, | (0.00, | (-0.43, | 0.054  | (0.00, | (0.00,  | (-2.21, | <0.001 |
|               | 52.80) | 57.35) | -0.01)  |        | 77.71)  | 83.38)  | -0.02)  |        | 46.07) | 49.85) | 0.00)   | 41.75) | 45.29) | -2.21)  |         |        |
|               | 1.20   | 1.24   | 0.11    |        | 3.97    | 4.11    | 0.12    |        | 2.06   | 1.45   | -1.37   | 0.03   | 0.02   | -1.34   |         |        |
| Grenada       | (0.00, | (0.00, | (0.01,  | 0.027  | (0.01,  | (0.03,  | (0.09,  | <0.001 | (0.00, | (0.00, | (-2.35, | 0.007  | (0.00, | (0.00,  | (-1.34, | <0.001 |
|               | 30.47) | 23.44) | 0.21)   |        | 35.79)  | 28.82)  | 0.15)   |        | 32.05) | 23.80) | -0.38)  | 28.14) | 21.00) | -1.34)  |         |        |
|               | 2.57   | 2.75   | 0.23    |        | 8.54    | 9.11    | 0.22    |        | 3.34   | 5.46   | 1.72    | 0.05   | 0.09   | 2.22    |         |        |
| Guam          | (0.03, | (0.03, | (0.17,  | <0.001 | (1.57,  | (1.58,  | (0.18,  | <0.001 | (0.11, | (0.43, | (0.81,  | <0.001 | (0.00, | (0.00,  | (1.19,  | <0.001 |
|               | 17.00) | 18.34) | 0.28)   |        | 26.62)  | 28.76)  | 0.26)   |        | 18.27) | 22.91) | 2.63)   | 12.32) | 13.28) | 3.26)   |         |        |
|               | 1.18   | 1.21   | 0.10    |        | 3.93    | 4.02    | 0.09    |        | 0.66   | 0.65   | -0.08   | 0.01   | 0.01   | 0.00    |         |        |
| Guatemala     | (0.64, | (0.85, | (0.01,  | 0.025  | (2.85,  | (3.34,  | (0.06,  | <0.001 | (0.28, | (0.40, | (-0.33, | 0.520  | (0.00, | (0.00,  | (0.00,  | <0.001 |
|               | 2.02)  | 1.67)  | 0.19)   |        | 5.28)   | 4.81)   | 0.11)   |        | 1.34)  | 1.01)  | 0.17)   | 0.35)  | 0.14)  | 0.00)*  |         |        |
|               | 1.63   | 1.67   | 0.08    |        | 5.42    | 5.54    | 0.08    |        | 0.66   | 0.71   | 0.39    |        |        |         |         |        |
| Guinea        | (0.88, | (1.10, | (0.01,  | 0.035  | (3.93,  | (4.45,  | (0.05,  | <0.001 | (0.22, | (0.36, | (0.32,  | <0.001 | —      | —       | —       | —      |
|               | 2.79)  | 2.43)  | 0.16)   |        | 7.29)   | 6.81)   | 0.11)   |        | 1.51)  | 1.26)  | 0.46)   |        |        |         |         |        |
|               | 1.68   | 1.75   | 0.15    |        | 5.59    | 5.80    | 0.13    |        | 0.65   | 0.73   | 0.36    |        |        |         |         |        |
| Guinea-Bissau | (0.22, | (0.58, | (0.11,  | <0.001 | (2.24,  | (3.36,  | (0.10,  | <0.001 | (0.01, | (0.10, | (0.30,  | <0.001 | —      | —       | —       | —      |
|               | 5.94)  | 4.07)  | 0.18)   |        | 11.56)  | 9.35)   | 0.16)   |        | 4.24)  | 2.59)  | 0.42)   |        |        |         |         |        |
|               | 1.23   | 1.25   | 0.05    |        | 4.09    | 4.14    | 0.04    |        | 2.04   | 2.72   | 1.23    | 0.03   | 0.04   | 1.33    |         |        |
| Guyana        | (0.11, | (0.11, | (-0.02, | 0.142  | (1.40,  | (1.42,  | (-0.04, | 0.315  | (0.39, | (0.67, | (0.57,  | <0.001 | (0.00, | (0.00,  | (0.49,  | 0.002  |
|               | 5.06)  | 5.07)  | 0.12)   |        | 9.32)   | 9.36)   | 0.11)   |        | 6.28)  | 7.34)  | 1.90)   | 2.92)  | 2.91)  | 2.17)   |         |        |
|               | 1.19   | 1.21   | 0.05    |        | 3.93    | 4.01    | 0.07    |        | 1.36   | 1.39   | 0.07    | 0.02   | 0.02   | 0.00    |         |        |
| Haiti         | (0.61, | (0.80, | (-0.01, | 0.092  | (2.79,  | (3.23,  | (0.05,  | <0.001 | (0.73, | (0.95, | (-0.13, | 0.498  | (0.00, | (0.00,  | (0.00,  | 0.004  |
|               | 2.09)  | 1.75)  | 0.12)   |        | 5.39)   | 4.93)   | 0.09)   |        | 2.31)  | 1.96)  | 0.27)   | 0.41)  | 0.20)  | 0.00)*  |         |        |
|               | 1.20   | 1.21   | 0.04    |        | 3.97    | 4.03    | 0.06    |        | 0.57   | 0.49   | -0.55   |        |        |         |         |        |
| Honduras      | (0.51, | (0.73, | (-0.04, | 0.296  | (2.58,  | (3.10,  | (0.02,  | 0.001  | (0.14, | (0.21, | (-0.77, | <0.001 | —      | —       | —       | —      |
|               | 2.39)  | 1.89)  | 0.12)   |        | 5.85)   | 5.16)   | 0.10)   |        | 1.51)  | 0.97)  | -0.32)  |        |        |         |         |        |
|               | 5.43   | 5.17   | -0.17   |        | 18.01   | 17.15   | -0.17   |        | 1.97   | 1.75   | -0.39   | 0.01   | 0.01   | 0.00    |         |        |
| Hungary       | (4.51, | (4.16, | (-0.19, | <0.001 | (16.32, | (15.29, | (-0.19, | <0.001 | (1.44, | (1.19, | (-0.62, | 0.001  | (0.00, | (0.00,  | (0.00,  | <0.001 |
|               | 6.50)  | 6.38)  | -0.14)  |        | 19.85)  | 19.20)  | -0.14)  |        | 2.67)  | 2.53)  | -0.17)  | 0.25)  | 0.33)  | 0.00)*  |         |        |
| Iceland       | 6.09   | 5.60   | -0.24   | <0.001 | 20.23   | 18.59   | -0.24   | <0.001 | 2.54   | 2.34   | -0.26   | 0.353  | 0.02   | 0.01    | -2.31   | <0.001 |



|                               |        |        |         |        |         |         |         |        |        |        |         |        |        |        |         |        |
|-------------------------------|--------|--------|---------|--------|---------|---------|---------|--------|--------|--------|---------|--------|--------|--------|---------|--------|
|                               | (1.39, | (1.47, | (-0.36, |        | (10.08, | (9.88,  | (-0.35, |        | (0.15, | (0.20, | (-0.80, |        | (0.00, | (0.00, | (-2.31, |        |
|                               | 17.41) | 15.87) | -0.12)  |        | 36.54)  | 32.86)  | -0.13)  |        | 11.94) | 11.14) | 0.29)   |        | 7.52)  | 7.51)  | -2.31)  |        |
|                               | 2.33   | 2.33   | 0.00    |        | 7.72    | 7.72    | -0.00   |        | 0.93   | 1.03   | 0.38    |        | 0.01   | 0.01   |         |        |
| India                         | (2.25, | (2.27, | (-0.03, | 0.936  | (7.59,  | (7.62,  | (-0.02, | 0.905  | (0.88, | (0.99, | (0.15,  | 0.001  | (0.00, | (0.00, | —       | —      |
|                               | 2.41)  | 2.38)  | 0.03)   |        | 7.86)   | 7.82)   | 0.02)   |        | 0.97)  | 1.07)  | 0.61)   |        | 0.01)  | 0.01)  |         |        |
|                               | 2.73   | 2.82   | 0.10    |        | 9.06    | 9.35    | 0.11    |        | 1.40   | 1.56   | 0.36    |        | 0.01   | 0.01   | 0.00    |        |
| Indonesia                     | (2.55, | (2.68, | (0.06,  | <0.001 | (8.73,  | (9.10,  | (0.09,  | <0.001 | (1.28, | (1.46, | (0.24,  | <0.001 | (0.00, | (0.01, | (0.00,  | 0.998  |
|                               | 2.92)  | 2.96)  | 0.14)   |        | 9.39)   | 9.61)   | 0.13)   |        | 1.54)  | 1.67)  | 0.48)   |        | 0.03)  | 0.03)  | 0.00)   |        |
|                               | 2.10   | 2.10   | -0.02   |        | 6.96    | 6.98    | 0.01    |        | 0.80   | 0.83   | 0.11    |        |        |        |         |        |
| Iran (Islamic<br>Republic of) | (1.80, | (1.92, | (-0.10, | 0.722  | (6.40,  | (6.65,  | (-0.05, | 0.809  | (0.62, | (0.72, | (-0.10, | 0.305  | —      | —      | —       | —      |
|                               | 2.43)  | 2.30)  | 0.07)   |        | 7.56)   | 7.33)   | 0.06)   |        | 1.02)  | 0.96)  | 0.31)   |        |        |        |         |        |
|                               | 2.29   | 2.32   | 0.04    |        | 7.61    | 7.70    | 0.04    |        | 2.35   | 2.58   | 0.33    |        | 0.03   | 0.04   | 0.99    |        |
| Iraq                          | (1.75, | (1.99, | (-0.01, | 0.156  | (6.58,  | (7.09,  | (0.01,  | 0.005  | (1.80, | (2.23, | (-0.09, | 0.124  | (0.00, | (0.01, | (0.99,  | <0.001 |
|                               | 2.96)  | 2.69)  | 0.08)   |        | 8.76)   | 8.36)   | 0.06)   |        | 3.02)  | 2.96)  | 0.75)   |        | 0.21)  | 0.11)  | 0.99)   |        |
|                               | 6.02   | 5.53   | -0.30   |        | 19.99   | 18.34   | -0.31   |        | 2.14   | 1.93   | -0.40   |        | 0.01   | 0.01   | 0.00    |        |
| Ireland                       | (4.31, | (4.15, | (-0.33, | <0.001 | (16.76, | (15.80, | (-0.33, | <0.001 | (1.18, | (1.17, | (-0.54, | <0.001 | (0.00, | (0.00, | (0.00,  | <0.001 |
|                               | 8.20)  | 7.27)  | -0.27)  |        | 23.68)  | 21.23)  | -0.28)  |        | 3.59)  | 3.07)  | -0.26)  |        | 0.60)  | 0.53)  | 0.00)*  |        |
|                               | 5.53   | 5.01   | -0.34   |        | 18.36   | 16.61   | -0.35   |        | 2.53   | 2.11   | -0.59   |        | 0.02   | 0.01   | -2.33   |        |
| Israel                        | (4.12, | (4.00, | (-0.38, | <0.001 | (15.72, | (14.74, | (-0.39, | <0.001 | (1.61, | (1.48, | (-0.80, | <0.001 | (0.00, | (0.00, | (-2.33, | <0.001 |
|                               | 7.28)  | 6.20)  | -0.30)  |        | 21.33)  | 18.67)  | -0.30)  |        | 3.79)  | 2.93)  | -0.37)  |        | 0.46)  | 0.26)  | -2.33)  |        |
|                               | 5.24   | 4.49   | -0.54   |        | 17.40   | 14.89   | -0.55   |        | 2.19   | 1.85   | -0.60   |        | 0.01   | 0.01   | 0.00    |        |
| Italy                         | (4.81, | (4.08, | (-0.56, | <0.001 | (16.62, | (14.15, | (-0.58, | <0.001 | (1.91, | (1.59, | (-0.72, | <0.001 | (0.00, | (0.00, | (0.00,  | <0.001 |
|                               | 5.70)  | 4.93)  | -0.52)  |        | 18.22)  | 15.67)  | -0.51)  |        | 2.49)  | 2.14)  | -0.49)  |        | 0.06)  | 0.07)  | 0.00)*  |        |
|                               | 1.18   | 1.26   | 0.22    |        | 3.92    | 4.19    | 0.23    |        | 1.45   | 2.59   | 2.16    |        | 0.02   | 0.04   | 2.76    |        |
| Jamaica                       | (0.34, | (0.49, | (0.12,  | <0.001 | (2.14,  | (2.62,  | (0.17,  | <0.001 | (0.49, | (1.42, | (0.02,  | 0.048  | (0.00, | (0.00, | (0.75,  | 0.007  |
|                               | 2.97)  | 2.65)  | 0.32)   |        | 6.60)   | 6.34)   | 0.29)   |        | 3.33)  | 4.36)  | 4.34)   |        | 1.10)  | 0.79)  | 4.81)   |        |
|                               | 4.47   | 4.77   | 0.21    |        | 14.83   | 15.82   | 0.21    |        | 1.74   | 1.78   | 0.08    |        | 0.01   | 0.01   | 0.00    |        |
| Japan                         | (4.21, | (4.47, | (0.18,  | <0.001 | (14.36, | (15.29, | (0.19,  | <0.001 | (1.58, | (1.61, | (-0.05, | 0.244  | (0.00, | (0.00, | (0.00,  | <0.001 |
|                               | 4.74)  | 5.08)  | 0.25)   |        | 15.32)  | 16.37)  | 0.24)   |        | 1.91)  | 1.98)  | 0.21)   |        | 0.03)  | 0.04)  | 0.00)*  |        |
|                               | 2.15   | 2.21   | 0.09    |        | 7.15    | 7.33    | 0.09    |        | 0.91   | 0.87   | -0.12   |        |        |        |         |        |
| Jordan                        | (1.06, | (1.67, | (0.06,  | <0.001 | (4.97,  | (6.32,  | (0.06,  | <0.001 | (0.27, | (0.55, | (-0.29, | 0.151  | —      | —      | —       | —      |
|                               | 3.90)  | 2.87)  | 0.13)   |        | 9.95)   | 8.46)   | 0.12)   |        | 2.22)  | 1.32)  | 0.05)   |        |        |        |         |        |
| Kazakhstan                    | 4.09   | 4.25   | 0.15    | <0.001 | 13.59   | 14.11   | 0.14    | <0.001 | 1.99   | 2.25   | 0.49    | 0.107  | 0.02   | 0.02   | 0.05    | 0.953  |

|                                  |               |               |               |        |                |                |               |        |               |               |               |              |               |               |               |        |
|----------------------------------|---------------|---------------|---------------|--------|----------------|----------------|---------------|--------|---------------|---------------|---------------|--------------|---------------|---------------|---------------|--------|
|                                  | (3.43, 4.85)  | (3.62, 4.97)  | (0.08, 0.21)  |        | (12.34, 14.93) | (12.93, 15.37) | (0.08, 0.21)  |        | (1.53, 2.54)  | (1.80, 2.80)  | (-0.11, 1.08) | (0.00, 0.15) | (0.00, 0.17)  | (-1.46, 1.58) |               |        |
|                                  | 1.14          | 1.17          | 0.10          |        | 3.77           | 3.89           | 0.12          |        | 0.78          | 0.88          | 0.43          | 0.01         | 0.01          | 0.00          |               |        |
| Kenya                            | (0.78, 1.60)  | (0.95, 1.43)  | (-0.05, 0.25) | 0.194  | (3.09, 4.55)   | (3.48, 4.34)   | (-0.01, 0.26) | 0.079  | (0.49, 1.17)  | (0.69, 1.10)  | (0.27, 0.59)  | <0.001       | (0.00, 0.15)  | (0.00, 0.06)  | (-0.00, 0.00) | 1.000  |
|                                  | 2.58          | 2.63          | 0.06          |        | 8.56           | 8.72           | 0.07          |        | 6.34          | 7.54          | 0.60          |              | 0.10          | 0.12          | 0.37          |        |
| Kiribati                         | (0.00, 37.18) | (0.01, 22.71) | (0.01, 0.12)  | 0.023  | (0.22, 48.09)  | (0.92, 33.10)  | (0.03, 0.11)  | 0.001  | (0.06, 43.91) | (0.64, 31.05) | (0.51, 0.69)  | <0.001       | (0.00, 32.29) | (0.00, 17.87) | (0.15, 0.59)  | 0.001  |
|                                  | 2.20          | 2.25          | 0.07          |        | 7.31           | 7.48           | 0.07          |        | 1.03          | 1.03          | 0.05          |              | 0.01          | 0.01          | 0.00          |        |
| Kuwait                           | (1.17, 4.07)  | (1.58, 3.31)  | (0.01, 0.13)  | 0.017  | (5.28, 10.09)  | (6.21, 9.08)   | (0.05, 0.10)  | <0.001 | (0.38, 2.59)  | (0.60, 1.89)  | (-0.62, 0.72) | 0.889        | (0.00, 1.24)  | (0.00, 0.67)  | (0.00, 0.00)* | <0.001 |
|                                  | 3.84          | 4.03          | 0.17          |        | 12.76          | 13.39          | 0.16          |        | 1.27          | 1.39          | 0.29          |              |               |               |               |        |
| Kyrgyzstan                       | (2.58, 5.52)  | (2.99, 5.33)  | (0.15, 0.19)  | <0.001 | (10.32, 15.60) | (11.39, 15.64) | (0.15, 0.18)  | <0.001 | (0.59, 2.37)  | (0.81, 2.24)  | (0.15, 0.42)  | <0.001       | —             | —             | —             | —      |
| Lao People's Democratic Republic | (1.47, 4.27)  | (1.84, 3.59)  | (0.01, 0.05)  | <0.001 | (6.40, 11.36)  | (7.19, 10.34)  | (0.01, 0.03)  | <0.001 | (0.52, 2.56)  | (0.98, 2.36)  | (0.61, 0.87)  | <0.001       | (0.00, 0.67)  | (0.00, 0.30)  | (2.33, 2.33)  | <0.001 |
|                                  | 4.90          | 5.36          | 0.34          |        | 16.26          | 17.80          | 0.34          |        | 1.54          | 1.73          | 0.41          |              |               |               |               |        |
| Latvia                           | (3.16, 7.30)  | (3.24, 8.69)  | (0.25, 0.43)  | <0.001 | (12.92, 20.24) | (13.70, 23.02) | (0.27, 0.42)  | <0.001 | (0.65, 3.12)  | (0.65, 4.16)  | (0.03, 0.79)  | 0.033        | —             | —             | —             | —      |
|                                  | 2.20          | 2.28          | 0.12          |        | 7.32           | 7.55           | 0.11          |        | 1.03          | 1.06          | 0.08          |              | 0.01          | 0.01          | 0.00          |        |
| Lebanon                          | (1.06, 4.06)  | (1.47, 3.40)  | (0.08, 0.15)  | <0.001 | (5.04, 10.26)  | (6.01, 9.41)   | (0.09, 0.12)  | <0.001 | (0.32, 2.47)  | (0.54, 1.92)  | (-0.01, 0.17) | 0.066        | (0.00, 0.83)  | (0.00, 0.46)  | (0.00, 0.00)* | <0.001 |
|                                  | 1.68          | 1.71          | 0.08          |        | 5.56           | 5.69           | 0.08          |        | 0.90          | 1.25          | 1.13          |              | 0.01          | 0.01          | 0.00          |        |
| Lesotho                          | (0.48, 4.20)  | (0.73, 3.42)  | (0.02, 0.13)  | 0.007  | (3.04, 9.35)   | (3.70, 8.37)   | (0.06, 0.11)  | <0.001 | (0.13, 3.04)  | (0.44, 2.79)  | (0.90, 1.37)  | <0.001       | (0.00, 1.50)  | (0.00, 0.86)  | (0.00, 0.00)* | <0.001 |
|                                  | 1.75          | 1.78          | 0.06          |        | 5.81           | 5.92           | 0.07          |        | 0.66          | 0.71          | 0.25          |              |               |               |               |        |
| Liberia                          | (0.59, 4.15)  | (0.99, 2.97)  | (0.00, 0.11)  | 0.038  | (3.43, 9.34)   | (4.37, 7.84)   | (0.04, 0.09)  | <0.001 | (0.08, 2.58)  | (0.26, 1.57)  | (-0.10, 0.60) | 0.156        | —             | —             | —             | —      |
|                                  | 2.21          | 2.27          | 0.10          |        | 7.35           | 7.54           | 0.09          |        | 0.85          | 0.89          | 0.07          |              |               |               |               |        |
| Libya                            | (1.25, 3.63)  | (1.63, 3.11)  | (0.05, 0.14)  | <0.001 | (5.46, 9.67)   | (6.33, 8.93)   | (0.06, 0.11)  | <0.001 | (0.31, 1.86)  | (0.51, 1.47)  | (-0.00, 0.14) | 0.055        | —             | —             | —             | —      |
|                                  | 5.19          | 5.64          | 0.28          | <0.001 | 17.21          | 18.71          | 0.29          | <0.001 | 1.66          | 1.79          | 0.36          | <0.001       | —             | —             | —             | —      |
| Lithuania                        |               |               |               |        |                |                |               |        |               |               |               |              |               |               |               |        |

|                  |        |        |         |        |         |         |         |        |        |        |         |        |        |        |         |        |
|------------------|--------|--------|---------|--------|---------|---------|---------|--------|--------|--------|---------|--------|--------|--------|---------|--------|
|                  | (3.62, | (3.69, | (0.25,  |        | (14.23, | (14.98, | (0.26,  |        | (0.84, | (0.79, | (0.29,  |        |        |        |         |        |
|                  | 7.20)  | 8.38)  | 0.32)   |        | 20.64)  | 23.20)  | 0.31)   |        | 2.96)  | 3.66)  | 0.42)   |        |        |        |         |        |
|                  | 6.17   | 5.82   | -0.21   |        | 20.49   | 19.32   | -0.21   |        | 2.59   | 2.22   | -0.54   |        | 0.02   | 0.01   | -2.31   |        |
| Luxembourg       | (2.10, | (2.48, | (-0.25, | <0.001 | (12.09, | (12.64, | (-0.24, | <0.001 | (0.37, | (0.46, | (-1.05, | 0.039  | (0.00, | (0.00, | (-2.31, | <0.001 |
|                  | 15.70) | 12.63) | -0.18)  |        | 33.77)  | 29.12)  | -0.19)  |        | 10.81) | 7.83)  | -0.03)  |        | 7.10)  | 4.72)  | -2.31)  |        |
|                  | 1.10   | 1.14   | 0.14    |        | 3.64    | 3.78    | 0.13    |        | 1.76   | 1.59   | -0.36   |        | 0.03   | 0.02   | -1.35   |        |
| Madagascar       | (0.66, | (0.84, | (0.07,  | <0.001 | (2.78,  | (3.22,  | (0.10,  | <0.001 | (1.19, | (1.24, | (-0.80, | 0.106  | (0.00, | (0.00, | (-1.35, | <0.001 |
|                  | 1.73)  | 1.51)  | 0.21)   |        | 4.70)   | 4.42)   | 0.15)   |        | 2.52)  | 2.02)  | 0.08)   |        | 0.28)  | 0.13)  | -1.35)  |        |
|                  | 1.16   | 1.20   | 0.13    |        | 3.83    | 3.98    | 0.13    |        | 0.74   | 0.86   | 0.52    |        | 0.01   | 0.01   | 0.00    |        |
| Malawi           | (0.64, | (0.82, | (0.01,  | 0.028  | (2.83,  | (3.26,  | (0.08,  | <0.001 | (0.35, | (0.55, | (0.46,  | <0.001 | (0.00, | (0.00, | (-0.00, | 1.000  |
|                  | 1.91)  | 1.69)  | 0.25)   |        | 5.08)   | 4.81)   | 0.19)   |        | 1.38)  | 1.29)  | 0.58)   |        | 0.31)  | 0.16)  | 0.00)   |        |
|                  | 2.70   | 2.74   | 0.05    |        | 8.95    | 9.10    | 0.06    |        | 1.65   | 2.00   | 0.68    |        | 0.02   | 0.02   | 0.00    |        |
| Malaysia         | (2.17, | (2.38, | (-0.00, | 0.054  | (7.95,  | (8.42,  | (0.04,  | <0.001 | (1.24, | (1.69, | (0.26,  | 0.001  | (0.00, | (0.00, | (0.00,  | <0.001 |
|                  | 3.32)  | 3.15)  | 0.11)   |        | 10.05)  | 9.83)   | 0.07)   |        | 2.16)  | 2.36)  | 1.09)   |        | 0.15)  | 0.10)  | 0.00)*  |        |
|                  | 2.55   | 2.65   | 0.13    |        | 8.45    | 8.78    | 0.13    |        | 1.32   | 1.19   | -0.31   |        | 0.01   | 0.01   | 0.00    |        |
| Maldives         | (0.01, | (0.94, | (0.10,  | <0.001 | (1.17,  | (5.25,  | (0.11,  | <0.001 | (0.00, | (0.20, | (-0.44, | <0.001 | (0.00, | (0.00, | (0.00,  | 0.018  |
|                  | 19.41) | 8.09)  | 0.15)   |        | 29.28)  | 15.47)  | 0.15)   |        | 17.22) | 6.35)  | -0.18)  |        | 14.67) | 5.00)  | 0.00)*  |        |
|                  | 1.63   | 1.69   | 0.12    |        | 5.40    | 5.61    | 0.13    |        | 0.62   | 0.71   | 0.51    |        | —      | —      | —       | —      |
| Mali             | (0.96, | (1.23, | (0.07,  | <0.001 | (4.11,  | (4.74,  | (0.11,  | <0.001 | (0.24, | (0.43, | (0.45,  | <0.001 | —      | —      | —       | —      |
|                  | 2.57)  | 2.27)  | 0.18)   |        | 6.96)   | 6.60)   | 0.16)   |        | 1.28)  | 1.12)  | 0.57)   |        |        |        |         |        |
|                  | 5.80   | 5.20   | -0.37   |        | 19.26   | 17.26   | -0.37   |        | 2.06   | 2.07   | 0.00    |        | 0.01   | 0.01   | 0.00    |        |
| Malta            | (1.79, | (1.60, | (-0.40, | <0.001 | (10.91, | (9.78,  | (-0.39, | <0.001 | (0.18, | (0.22, | (-0.37, | 0.997  | (0.00, | (0.00, | (0.00,  | <0.001 |
|                  | 14.86) | 14.80) | -0.35)  |        | 32.22)  | 29.99)  | -0.35)  |        | 9.47)  | 10.59) | 0.37)   |        | 6.22)  | 7.79)  | 0.00)*  |        |
|                  | 2.51   | 2.57   | 0.08    |        | 8.34    | 8.54    | 0.08    |        | 5.14   | 8.02   | 1.67    |        | 0.08   | 0.13   | 1.79    |        |
| Marshall Islands | (0.00, | (0.00, | (0.02,  | 0.007  | (0.02,  | (0.26,  | (0.06,  | <0.001 | (0.00, | (0.20, | (1.44,  | <0.001 | (0.00, | (0.00, | (1.43,  | <0.001 |
|                  | 57.61) | 36.16) | 0.14)   |        | 68.71)  | 46.78)  | 0.10)   |        | 62.53) | 45.92) | 1.90)   |        | 52.70) | 31.41) | 2.16)   |        |
|                  | 1.69   | 1.76   | 0.14    |        | 5.62    | 5.83    | 0.12    |        | 0.68   | 0.73   | 0.26    |        |        |        |         |        |
| Mauritania       | (0.55, | (0.86, | (0.11,  | <0.001 | (3.23,  | (4.04,  | (0.10,  | <0.001 | (0.08, | (0.21, | (0.20,  | <0.001 | —      | —      | —       | —      |
|                  | 3.97)  | 3.20)  | 0.17)   |        | 9.07)   | 8.14)   | 0.15)   |        | 2.47)  | 1.82)  | 0.33)   |        |        |        |         |        |
|                  | 2.65   | 2.72   | 0.09    |        | 8.81    | 9.02    | 0.08    |        | 1.43   | 1.61   | 0.49    |        | 0.01   | 0.02   | 2.33    |        |
| Mauritius        | (1.02, | (1.10, | (0.04,  | <0.001 | (5.47,  | (5.77,  | (0.06,  | <0.001 | (0.34, | (0.46, | (0.31,  | <0.001 | (0.00, | (0.00, | (2.33,  | <0.001 |
|                  | 5.66)  | 5.74)  | 0.13)   |        | 13.46)  | 13.57)  | 0.10)   |        | 3.94)  | 4.21)  | 0.67)   |        | 1.60)  | 1.75)  | 2.33)   |        |
| Mexico           | 1.26   | 1.29   | 0.08    | 0.002  | 4.17    | 4.27    | 0.09    | <0.001 | 0.92   | 0.96   | 0.17    | 0.011  | 0.01   | 0.01   | 0.00    | <0.001 |

|                   |         |         |         |        |         |         |         |        |         |         |         |         |         |        |         |        |
|-------------------|---------|---------|---------|--------|---------|---------|---------|--------|---------|---------|---------|---------|---------|--------|---------|--------|
|                   | (1.07,  | (1.15,  | (0.03,  |        | (3.83,  | (4.02,  | (0.07,  |        | (0.76,  | (0.84,  | (0.04,  | (0.00,  | (0.00,  | (0.00, |         |        |
|                   | 1.46)   | 1.44)   | 0.14)   |        | 4.54)   | 4.54)   | 0.11)   |        | 1.10)   | 1.09)   | 0.30)   | 0.05)   | 0.03)   | 0.00)* |         |        |
| Micronesia        | 2.51    | 2.55    | 0.05    |        | 8.32    | 8.45    | 0.06    |        | 6.62    | 7.87    | 0.59    | 0.11    | 0.13    | 0.58   |         |        |
| (Federated States | (0.00,  | (0.00,  | (0.02,  | 0.003  | (0.53,  | (0.63,  | (0.04,  | <0.001 | (0.26,  | (0.53,  | (0.49,  | <0.001  | (0.00,  | (0.00, | (0.05,  | 0.034  |
| of)               | 26.90)  | 25.67)  | 0.09)   |        | 37.13)  | 35.97)  | 0.07)   |        | 34.05)  | 34.82)  | 0.69)   | 22.21)  | 20.94)  | 1.12)  |         |        |
|                   | 6.03    | 5.34    | -0.42   |        | 20.03   | 17.73   | -0.42   |        | 2.48    | 2.31    | -0.29   | 0.01    | 0.01    | -0.07  |         |        |
| Monaco            | (0.00,  | (0.00,  | (-0.46, | <0.001 | (0.68,  | (0.31,  | (-0.45, | <0.001 | (0.00,  | (0.00,  | (-0.37, | <0.001  | (0.00,  | (0.00, | (-2.53, | 0.956  |
|                   | 128.34) | 95.99)  | -0.39)  |        | 147.85) | 117.14) | -0.40)  |        | 123.30) | 90.51)  | -0.22)  | 119.84) | 86.28)  | 2.46)  |         |        |
|                   | 3.87    | 4.13    | 0.23    |        | 12.84   | 13.70   | 0.23    |        | 1.28    | 1.40    | 0.34    |         |         |        |         |        |
| Mongolia          | (2.00,  | (2.82,  | (0.19,  | <0.001 | (9.11,  | (11.19, | (0.19,  | <0.001 | (0.34,  | (0.69,  | (0.15,  | <0.001  | —       | —      | —       | —      |
|                   | 6.79)   | 5.94)   | 0.26)   |        | 17.59)  | 16.70)  | 0.27)   |        | 3.35)   | 2.65)   | 0.53)   |         |         |        |         |        |
|                   | 5.05    | 4.83    | -0.16   |        | 16.75   | 16.03   | -0.15   |        | 3.46    | 2.82    | -0.84   | 0.04    | 0.03    | -0.96  |         |        |
| Montenegro        | (1.97,  | (1.76,  | (-0.21, | <0.001 | (10.51, | (9.78,  | (-0.19, | <0.001 | (1.05,  | (0.68,  | (-1.75, | 0.073   | (0.00,  | (0.00, | (-0.96, | <0.001 |
|                   | 10.68)  | 11.01)  | -0.11)  |        | 25.42)  | 25.15)  | -0.10)  |        | 8.49)   | 8.19)   | 0.08)   | 3.07)   | 3.88)   | -0.96) |         |        |
|                   | 2.27    | 2.24    | -0.05   |        | 7.52    | 7.44    | -0.03   |        | 0.90    | 0.83    | -0.28   |         |         |        |         |        |
| Morocco           | (1.83,  | (1.92,  | (-0.10, | 0.125  | (6.70,  | (6.84,  | (-0.08, | 0.249  | (0.63,  | (0.63,  | (-0.59, | 0.085   | —       | —      | —       | —      |
|                   | 2.78)   | 2.61)   | 0.01)   |        | 8.41)   | 8.09)   | 0.02)   |        | 1.24)   | 1.06)   | 0.04)   |         |         |        |         |        |
|                   | 1.14    | 1.18    | 0.12    |        | 3.78    | 3.91    | 0.13    |        | 0.70    | 1.00    | 1.25    | 0.01    | 0.01    | 0.00   |         |        |
| Mozambique        | (0.69,  | (0.86,  | (0.06,  | <0.001 | (2.91,  | (3.30,  | (0.09,  | <0.001 | (0.36,  | (0.71,  | (1.11,  | <0.001  | (0.00,  | (0.00, | (0.00,  | <0.001 |
|                   | 1.78)   | 1.58)   | 0.19)   |        | 4.84)   | 4.59)   | 0.17)   |        | 1.23)   | 1.37)   | 1.39)   | 0.23)   | 0.12)   | 0.00)* |         |        |
|                   | 2.61    | 2.64    | 0.04    |        | 8.65    | 8.75    | 0.04    |        | 1.57    | 1.66    | 0.21    | 0.02    | 0.02    | 0.00   |         |        |
| Myanmar           | (2.24,  | (2.33,  | (0.01,  | 0.005  | (7.97,  | (8.19,  | (0.02,  | <0.001 | (1.29,  | (1.42,  | (0.08,  | 0.001   | (0.00,  | (0.00, | (0.00,  | <0.001 |
|                   | 3.02)   | 2.97)   | 0.07)   |        | 9.38)   | 9.34)   | 0.06)   |        | 1.90)   | 1.93)   | 0.35)   | 0.08)   | 0.07)   | 0.00)* |         |        |
|                   | 1.65    | 1.72    | 0.16    |        | 5.47    | 5.70    | 0.15    |        | 1.00    | 1.22    | 0.73    | 0.01    | 0.01    | -0.20  |         |        |
| Namibia           | (0.36,  | (0.71,  | (0.08,  | <0.001 | (2.66,  | (3.65,  | (0.11,  | <0.001 | (0.11,  | (0.41,  | (0.40,  | <0.001  | (0.00,  | (0.00, | (-0.20, | <0.001 |
|                   | 4.74)   | 3.50)   | 0.23)   |        | 9.98)   | 8.50)   | 0.19)   |        | 3.74)   | 2.82)   | 1.05)   | 2.01)   | 0.92)   | -0.20) |         |        |
|                   | 2.60    | 2.66    | 0.08    |        | 8.61    | 8.82    | 0.09    |        | 7.97    | 9.30    | 0.54    | 0.13    | 0.16    | 0.76   |         |        |
| Nauru             | (0.00,  | (0.00,  | (0.03,  | 0.003  | (0.00,  | (0.00,  | (0.05,  | <0.001 | (0.00,  | (0.00,  | (0.49,  | <0.001  | (0.00,  | (0.00, | (0.53,  | <0.001 |
|                   | 212.87) | 192.17) | 0.13)   |        | 225.10) | 204.66) | 0.12)   |        | 223.42) | 205.21) | 0.60)   | 207.82) | 187.03) | 1.00)  |         |        |
|                   | 2.23    | 2.17    | -0.10   |        | 7.40    | 7.19    | -0.10   |        | 0.80    | 0.83    | 0.17    |         |         |        |         |        |
| Nepal             | (1.72,  | (1.77,  | (-0.15, | 0.001  | (6.44,  | (6.44,  | (-0.12, | <0.001 | (0.51,  | (0.59,  | (-0.17, | 0.335   | —       | —      | —       | —      |
|                   | 2.84)   | 2.63)   | -0.04)  |        | 8.45)   | 8.01)   | -0.07)  |        | 1.20)   | 1.14)   | 0.50)   |         |         |        |         |        |
| Netherlands       | 5.34    | 4.95    | -0.27   | <0.001 | 17.73   | 16.43   | -0.27   | <0.001 | 2.11    | 1.85    | -0.50   | <0.001  | 0.01    | 0.01   | 0.00    | <0.001 |

|                          |         |         |         |        |          |          |         |        |          |          |         |        |         |         |         |        |
|--------------------------|---------|---------|---------|--------|----------|----------|---------|--------|----------|----------|---------|--------|---------|---------|---------|--------|
|                          | (4.58,  | (4.16,  | (-0.29, |        | (16.32,  | (14.97,  | (-0.29, |        | (1.64,   | (1.38,   | (-0.62, | (0.00, | (0.00,  | (0.00,  |         |        |
|                          | 6.21)   | 5.85)   | -0.24)  |        | 19.25)   | 18.00)   | -0.25)  |        | 2.69)    | 2.43)    | -0.37)  | 0.16)  | 0.17)   | 0.00)*  |         |        |
|                          | 6.56    | 7.23    | 0.36    |        | 21.78    | 23.99    | 0.35    |        | 2.36     | 2.65     | 0.36    | 0.01   | 0.01    | 0.00    |         |        |
| New Zealand              | (4.79,  | (5.38,  | (0.27,  | <0.001 | (18.44,  | (20.52,  | (0.28,  | <0.001 | (1.36,   | (1.59,   | (0.03,  | 0.034  | (0.00,  | (0.00,  | (0.00,  | <0.001 |
|                          | 8.78)   | 9.52)   | 0.44)   |        | 25.57)   | 27.90)   | 0.43)   |        | 3.82)    | 4.17)    | 0.68)   | 0.57)  | 0.57)   | 0.00)*  |         |        |
|                          | 1.20    | 1.23    | 0.09    |        | 3.99     | 4.10     | 0.10    |        | 0.69     | 0.62     | -0.37   | 0.01   |         |         |         |        |
| Nicaragua                | (0.45,  | (0.70,  | (-0.01, | 0.069  | (2.44,   | (3.05,   | (0.06,  | <0.001 | (0.17,   | (0.27,   | (-0.77, | 0.072  | (0.00,  | —       | —       | —      |
|                          | 2.61)   | 2.02)   | 0.18)   |        | 6.17)    | 5.38)    | 0.14)   |        | 1.88)    | 1.23)    | 0.03)   | 0.76)  |         |         |         |        |
|                          | 1.66    | 1.70    | 0.09    |        | 5.50     | 5.63     | 0.09    |        | 0.63     | 0.70     | 0.34    |        |         |         |         |        |
| Niger                    | (0.96,  | (1.24,  | (0.03,  | 0.004  | (4.13,   | (4.77,   | (0.06,  | <0.001 | (0.24,   | (0.42,   | (0.26,  | <0.001 | —       | —       | —       | —      |
|                          | 2.67)   | 2.27)   | 0.15)   |        | 7.17)    | 6.61)    | 0.11)   |        | 1.36)    | 1.10)    | 0.42)   |        |         |         |         |        |
|                          | 1.74    | 1.82    | 0.16    |        | 5.78     | 6.03     | 0.15    |        | 0.71     | 0.74     | 0.16    |        |         |         |         |        |
| Nigeria                  | (1.53,  | (1.67,  | (0.13,  | <0.001 | (5.38,   | (5.76,   | (0.13,  | <0.001 | (0.58,   | (0.64,   | (-0.00, | 0.052  | —       | —       | —       | —      |
|                          | 1.97)   | 1.98)   | 0.20)   |        | 6.19)    | 6.32)    | 0.17)   |        | 0.87)    | 0.84)    | 0.33)   |        |         |         |         |        |
|                          | 2.62    | 2.70    |         |        |          |          |         |        |          |          |         | 0.10   | 0.08    | -0.85   |         |        |
| Niue                     | (0.00,  | (0.00,  | 0.10    |        | 8.71     | 8.95     | 0.09    |        | 6.02     | 5.19     | -0.57   |        | (0.00,  | (0.00,  |         |        |
|                          | 1036.77 | 1472.24 | (0.06,  | <0.001 | (0.00,   | (0.00,   | (0.08,  | <0.001 | (0.00,   | (0.00,   | (-0.86, | <0.001 | 1031.47 | 1467.15 | (-2.12, | 0.197  |
|                          | )       | )       | 0.14)   |        | 1049.45) | 1484.16) | 0.11)   |        | 1043.88) | 1477.35) | -0.28)  |        | )       | )       | 0.44)   |        |
|                          | 4.55    | 4.49    | -0.04   |        | 15.11    | 14.90    | -0.05   |        | 1.91     | 1.72     | -0.34   |        | 0.01    | 0.01    | 0.00    |        |
| North Macedonia          | (2.75,  | (2.81,  | (-0.07, | 0.006  | (11.64,  | (11.68,  | (-0.06, | <0.001 | (0.83,   | (0.76,   | (-0.73, | 0.088  | (0.00,  | (0.00,  | (0.00,  | <0.001 |
|                          | 7.10)   | 7.03)   | -0.01)  |        | 19.30)   | 18.92)   | -0.04)  |        | 3.78)    | 3.62)    | 0.05)   |        | 0.94)   | 1.29)   | 0.00)*  |        |
|                          | 2.59    | 2.68    | 0.10    |        | 8.60     | 8.90     | 0.10    |        | 6.47     | 6.61     | 0.07    |        | 0.11    | 0.11    | 0.00    |        |
| Northern Mariana Islands | (0.00,  | (0.00,  | (0.02,  | 0.012  | (0.35,   | (0.01,   | (0.05,  | <0.001 | (0.11,   | (0.00,   | (-0.10, | 0.421  | (0.00,  | (0.00,  | (0.00,  | <0.001 |
|                          | 47.07)  | 84.87)  | 0.18)   |        | 55.93)   | 95.95)   | 0.15)   |        | 52.78)   | 92.43)   | 0.23)   |        | 43.35)  | 80.00)  | 0.00)*  |        |
|                          | 5.53    | 5.01    | -0.34   |        | 18.35    | 16.65    | -0.34   |        | 2.24     | 1.87     | -0.63   |        | 0.01    | 0.01    | 0.00    |        |
| Norway                   | (4.08,  | (3.73,  | (-0.37, | <0.001 | (15.62,  | (14.23,  | (-0.35, | <0.001 | (1.36,   | (1.12,   | (-0.80, | <0.001 | (0.00,  | (0.00,  | (0.00,  | <0.001 |
|                          | 7.36)   | 6.64)   | -0.32)  |        | 21.45)   | 19.39)   | -0.33)  |        | 3.51)    | 2.97)    | -0.46)  |        | 0.53)   | 0.50)   | 0.00)*  |        |
|                          | 2.11    | 2.29    | 0.28    |        | 6.99     | 7.59     | 0.28    |        | 0.89     | 0.93     | 0.09    |        | 0.01    | 0.01    |         |        |
| Oman                     | (1.08,  | (1.70,  | (0.23,  | <0.001 | (4.95,   | (6.48,   | (0.25,  | <0.001 | (0.29,   | (0.58,   | (-0.03, | 0.139  | (0.00,  | (0.00,  | —       | —      |
|                          | 3.83)   | 3.21)   | 0.34)   |        | 9.68)    | 9.01)    | 0.32)   |        | 2.23)    | 1.68)    | 0.22)   |        | 0.93)   | 0.62)   |         |        |
|                          | 2.37    | 2.36    | -0.02   |        | 7.87     | 7.82     | -0.02   |        | 0.95     | 1.13     | 0.66    |        | 0.01    | 0.01    | 0.00    |        |
| Pakistan                 | (2.14,  | (2.20,  | (-0.07, | 0.518  | (7.43,   | (7.54,   | (-0.07, | 0.336  | (0.80,   | (1.03,   | (0.37,  | <0.001 | (0.00,  | (0.00,  | (0.00,  | <0.001 |
|                          | 2.62)   | 2.52)   | 0.04)   |        | 8.32)    | 8.11)    | 0.03)   |        | 1.11)    | 1.25)    | 0.96)   |        | 0.03)   | 0.02)   | 0.00)*  |        |

|                  |         |         |         |        |         |         |         |        |         |         |         |        |         |         |         |        |
|------------------|---------|---------|---------|--------|---------|---------|---------|--------|---------|---------|---------|--------|---------|---------|---------|--------|
|                  | 2.62    | 2.71    | 0.11    |        | 8.71    | 8.98    | 0.11    |        | 3.65    | 3.94    | 0.27    |        | 0.05    | 0.06    | 0.76    |        |
| Palau            | (0.00,  | (0.00,  | (0.08,  | <0.001 | (0.00,  | (0.00,  | (0.10,  | <0.001 | (0.00,  | (0.00,  | (0.07,  | 0.010  | (0.00,  | (0.00,  | (0.76,  | <0.001 |
|                  | 120.26) | 134.73) | 0.14)   |        | 132.37) | 143.96) | 0.12)   |        | 122.23) | 136.76) | 0.48)   |        | 115.01) | 130.73) | 0.76)   |        |
|                  | 2.09    | 2.14    | 0.09    |        | 6.92    | 7.11    | 0.09    |        | 1.21    | 1.31    | 0.20    |        | 0.01    | 0.01    | -0.64   |        |
| Palestine        | (0.69,  | (1.26,  | (0.06,  | <0.001 | (4.01,  | (5.38,  | (0.07,  | <0.001 | (0.24,  | (0.64,  | (-0.21, | 0.337  | (0.00,  | (0.00,  | (-4.24, | 0.731  |
|                  | 4.85)   | 3.42)   | 0.12)   |        | 11.15)  | 9.22)   | 0.11)   |        | 3.60)   | 2.38)   | 0.60)   |        | 1.60)   | 0.50)   | 3.09)   |        |
|                  | 1.19    | 1.24    | 0.15    |        | 3.94    | 4.12    | 0.16    |        | 0.83    | 0.95    | 0.56    |        | 0.01    | 0.01    | 0.00    |        |
| Panama           | (0.38,  | (0.59,  | (0.07,  | <0.001 | (2.26,  | (2.82,  | (0.13,  | <0.001 | (0.20,  | (0.40,  | (0.16,  | 0.006  | (0.00,  | (0.00,  | (0.00,  | <0.001 |
|                  | 2.80)   | 2.30)   | 0.23)   |        | 6.39)   | 5.81)   | 0.19)   |        | 2.27)   | 1.92)   | 0.97)   |        | 0.93)   | 0.49)   | 0.00)*  |        |
|                  | 2.52    | 2.55    | 0.04    |        | 8.36    | 8.46    | 0.04    |        | 3.01    | 3.66    | 0.64    |        | 0.04    | 0.05    | 0.76    |        |
| Papua New Guinea | (1.46,  | (1.87,  | (-0.01, | 0.093  | (6.29,  | (7.16,  | (0.03,  | <0.001 | (1.85,  | (2.84,  | (0.50,  | <0.001 | (0.00,  | (0.00,  | (0.76,  | <0.001 |
|                  | 4.05)   | 3.40)   | 0.09)   |        | 10.89)  | 9.92)   | 0.06)   |        | 4.64)   | 4.66)   | 0.78)   |        | 0.65)   | 0.31)   | 0.76)   |        |
|                  | 1.76    | 1.74    | -0.03   |        | 5.86    | 5.79    | -0.04   |        | 0.94    | 1.10    | 0.59    |        | 0.01    | 0.01    | 0.00    |        |
| Paraguay         | (0.91,  | (1.13,  | (-0.08, | 0.324  | (4.17,  | (4.61,  | (-0.07, | 0.005  | (0.36,  | (0.63,  | (0.22,  | 0.002  | (0.00,  | (0.00,  | (0.00,  | <0.001 |
|                  | 3.09)   | 2.58)   | 0.03)   |        | 8.00)   | 7.18)   | -0.01)  |        | 2.01)   | 1.79)   | 0.96)   |        | 0.57)   | 0.28)   | 0.00)*  |        |
|                  | 0.45    | 0.47    | 0.13    |        | 1.49    | 1.56    | 0.16    |        | 0.89    | 0.75    | -0.48   |        | 0.01    | 0.01    | 0.00    |        |
| Peru             | (0.25,  | (0.32,  | (0.00,  | 0.050  | (1.10,  | (1.28,  | (0.12,  | <0.001 | (0.60,  | (0.55,  | (-1.00, | 0.067  | (0.00,  | (0.00,  | (0.00,  | <0.001 |
|                  | 0.74)   | 0.67)   | 0.26)   |        | 1.96)   | 1.89)   | 0.21)   |        | 1.27)   | 0.99)   | 0.03)   |        | 0.14)   | 0.08)   | 0.00)*  |        |
|                  | 2.59    | 2.63    | 0.05    |        | 8.59    | 8.71    | 0.05    |        | 1.24    | 2.42    | 2.36    |        | 0.01    | 0.03    | 3.87    |        |
| Philippines      | (2.29,  | (2.41,  | (0.03,  | <0.001 | (8.03,  | (8.32,  | (0.03,  | <0.001 | (1.04,  | (2.22,  | (2.04,  | <0.001 | (0.00,  | (0.01,  | (1.58,  | 0.001  |
|                  | 2.92)   | 2.85)   | 0.06)   |        | 9.17)   | 9.12)   | 0.06)   |        | 1.47)   | 2.64)   | 2.68)   |        | 0.05)   | 0.07)   | 6.21)   |        |
|                  | 4.87    | 4.84    | -0.00   |        | 16.17   | 16.05   | -0.01   |        | 1.82    | 1.80    | -0.05   |        | 0.01    | 0.01    | 0.00    |        |
| Poland           | (4.43,  | (4.39,  | (-0.09, | 0.937  | (15.36, | (15.23, | (-0.10, | 0.908  | (1.55,  | (1.53,  | (-0.41, | 0.792  | (0.00,  | (0.00,  | (0.00,  | <0.001 |
|                  | 5.36)   | 5.33)   | 0.09)   |        | 17.03)  | 16.92)  | 0.09)   |        | 2.13)   | 2.12)   | 0.32)   |        | 0.07)   | 0.10)   | 0.00)*  |        |
|                  | 6.26    | 5.33    | -0.54   |        | 20.76   | 17.70   | -0.53   |        | 2.70    | 2.06    | -0.98   |        | 0.02    | 0.01    | -2.28   |        |
| Portugal         | (5.16,  | (4.32,  | (-0.64, | <0.001 | (18.73, | (15.85, | (-0.63, | <0.001 | (2.00,  | (1.46,  | (-1.24, | <0.001 | (0.00,  | (0.00,  | (-2.28, | <0.001 |
|                  | 7.51)   | 6.53)   | -0.43)  |        | 22.96)  | 19.74)  | -0.44)  |        | 3.57)   | 2.85)   | -0.72)  |        | 0.24)   | 0.29)   | -2.28)  |        |
|                  | 1.23    | 1.29    | 0.17    |        | 4.09    | 4.28    | 0.16    |        | 1.58    | 1.50    | -0.12   |        | 0.02    | 0.02    | -0.43   |        |
| Puerto Rico      | (0.53,  | (0.53,  | (0.05,  | 0.005  | (2.67,  | (2.77,  | (0.11,  | <0.001 | (0.76,  | (0.67,  | (-0.90, | 0.765  | (0.00,  | (0.00,  | (-0.89, | 0.063  |
|                  | 2.45)   | 2.63)   | 0.28)   |        | 6.00)   | 6.35)   | 0.21)   |        | 2.91)   | 2.91)   | 0.67)   |        | 0.63)   | 0.73)   | 0.03)   |        |
|                  | 2.25    | 2.27    | 0.03    |        | 7.45    | 7.54    | 0.03    |        | 1.38    | 1.25    | -0.40   |        | 0.01    | 0.01    | 0.00    |        |
| Qatar            | (0.74,  | (1.60,  | (-0.04, | 0.424  | (4.33,  | (6.26,  | (-0.00, | 0.063  | (0.31,  | (0.78,  | (-0.58, | <0.001 | (0.00,  | (0.00,  | (0.00,  | <0.001 |
|                  | 7.68)   | 3.69)   | 0.09)   |        | 13.87)  | 9.45)   | 0.07)   |        | 6.66)   | 2.55)   | -0.23)  |        | 5.16)   | 1.26)   | 0.00)*  |        |

|                    |        |        |         |        |         |         |         |        |        |        |         |        |        |        |         |        |
|--------------------|--------|--------|---------|--------|---------|---------|---------|--------|--------|--------|---------|--------|--------|--------|---------|--------|
|                    | 5.56   | 5.07   | -0.32   |        | 18.47   | 16.84   | -0.32   |        | 2.13   | 1.78   | -0.61   |        | 0.01   | 0.01   | 0.00    |        |
| Republic of Korea  | (5.11, | (4.67, | (-0.36, | <0.001 | (17.62, | (16.11, | (-0.35, | <0.001 | (1.85, | (1.54, | (-0.84, | <0.001 | (0.00, | (0.00, | (0.00,  | <0.001 |
|                    | 6.05)  | 5.51)  | -0.28)  |        | 19.35)  | 17.61)  | -0.29)  |        | 2.44)  | 2.05)  | -0.37)  |        | 0.06)  | 0.07)  | 0.00)*  |        |
| Republic of        | 5.06   | 5.36   | 0.20    |        | 16.78   | 17.78   | 0.20    |        | 1.63   | 1.76   | 0.18    |        |        |        |         |        |
| Moldova            | (3.74, | (3.93, | (0.10,  | <0.001 | (14.29, | (15.10, | (0.11,  | <0.001 | (0.93, | (1.00, | (-0.06, | 0.136  | —      | —      | —       | —      |
|                    | 6.74)  | 7.28)  | 0.29)   |        | 19.61)  | 20.93)  | 0.29)   |        | 2.72)  | 3.07)  | 0.41)   |        |        |        |         |        |
|                    | 4.83   | 4.74   | -0.09   |        | 16.03   | 15.74   | -0.08   |        | 1.57   | 1.59   | -0.03   |        |        |        |         |        |
| Romania            | (4.23, | (4.06, | (-0.14, | 0.001  | (14.92, | (14.47, | (-0.14, | 0.010  | (1.24, | (1.21, | (-0.22, | 0.801  | —      | —      | —       | —      |
|                    | 5.51)  | 5.53)  | -0.03)  |        | 17.22)  | 17.10)  | -0.02)  |        | 1.98)  | 2.08)  | 0.17)   |        |        |        |         |        |
|                    | 4.70   | 4.99   | 0.20    |        | 15.60   | 16.56   | 0.21    |        | 1.58   | 1.72   | 0.32    |        |        | 0.01   |         |        |
| Russian Federation | (4.47, | (4.75, | (0.16,  | <0.001 | (15.19, | (16.12, | (0.18,  | <0.001 | (1.45, | (1.58, | (0.22,  | <0.001 | —      | (0.00, | —       | —      |
|                    | 4.94)  | 5.24)  | 0.25)   |        | 16.03)  | 17.01)  | 0.23)   |        | 1.72)  | 1.87)  | 0.41)   |        |        | 0.03)  |         |        |
|                    | 1.13   | 1.17   | 0.12    |        | 3.75    | 3.87    | 0.11    |        | 1.04   | 0.98   | -0.17   |        | 0.01   | 0.01   | 0.00    |        |
| Rwanda             | (0.59, | (0.77, | (0.05,  | 0.001  | (2.68,  | (3.10,  | (0.05,  | <0.001 | (0.52, | (0.62, | (-0.28, | 0.005  | (0.00, | (0.00, | (0.00,  | <0.001 |
|                    | 1.97)  | 1.70)  | 0.19)   |        | 5.12)   | 4.78)   | 0.16)   |        | 1.85)  | 1.48)  | -0.05)  |        | 0.38)  | 0.19)  | 0.00)*  |        |
|                    | 1.21   | 1.27   | 0.17    |        | 4.02    | 4.21    | 0.16    |        | 2.78   | 1.58   | -1.14   |        | 0.04   | 0.02   | -1.72   |        |
| Saint Kitts and    | (0.00, | (0.00, | (0.11,  | <0.001 | (0.00,  | (0.01,  | (0.13,  | <0.001 | (0.00, | (0.00, | (-3.41, | 0.333  | (0.00, | (0.00, | (-5.72, | 0.412  |
| Nevis              | 54.77) | 38.76) | 0.24)   |        | 60.34)  | 43.76)  | 0.19)   |        | 57.76) | 39.32) | 1.18)   |        | 52.41) | 36.57) | 2.44)   |        |
|                    | 1.24   | 1.27   | 0.08    |        | 4.10    | 4.22    | 0.08    |        | 2.00   | 1.76   | -0.36   |        | 0.03   | 0.03   | -0.30   |        |
| Saint Lucia        | (0.00, | (0.00, | (0.02,  | 0.012  | (0.05,  | (0.31,  | (0.06,  | <0.001 | (0.00, | (0.01, | (-1.09, | 0.344  | (0.00, | (0.00, | (-0.81, | 0.251  |
|                    | 21.84) | 14.12) | 0.14)   |        | 27.16)  | 19.00)  | 0.11)   |        | 23.19) | 15.02) | 0.38)   |        | 19.45) | 11.83) | 0.22)   |        |
|                    | 1.20   | 1.25   | 0.15    |        | 3.98    | 4.15    | 0.16    |        | 2.21   | 1.77   | -0.46   |        | 0.03   | 0.03   | -0.44   |        |
| Saint Vincent and  | (0.00, | (0.00, | (0.09,  | <0.001 | (0.02,  | (0.07,  | (0.13,  | <0.001 | (0.00, | (0.00, | (-1.80, | 0.508  | (0.00, | (0.00, | (-1.00, | 0.124  |
| the Grenadines     | 25.75) | 20.86) | 0.21)   |        | 31.00)  | 26.06)  | 0.18)   |        | 27.48) | 21.87) | 0.90)   |        | 23.46) | 18.47) | 0.13)   |        |
|                    | 2.65   | 2.72   | 0.09    |        | 8.79    | 9.02    | 0.08    |        | 4.21   | 5.08   | 0.66    |        | 0.06   | 0.08   | 0.72    |        |
| Samoa              | (0.01, | (0.05, | (0.03,  | 0.003  | (1.05,  | (1.88,  | (0.06,  | <0.001 | (0.11, | (0.50, | (0.53,  | <0.001 | (0.00, | (0.00, | (0.36,  | <0.001 |
|                    | 21.79) | 16.21) | 0.14)   |        | 32.19)  | 26.32)  | 0.10)   |        | 24.38) | 20.07) | 0.79)   |        | 16.87) | 11.28) | 1.07)   |        |
|                    | 6.01   | 5.31   | -0.43   |        | 19.94   | 17.63   | -0.42   |        | 2.13   | 1.97   | -0.31   |        | 0.01   | 0.01   | 0.00    |        |
| San Marino         | (0.00, | (0.00, | (-0.48, | <0.001 | (0.34,  | (0.35,  | (-0.46, | <0.001 | (0.00, | (0.00, | (-0.46, | <0.001 | (0.00, | (0.00, | (0.00,  | 0.001  |
|                    | 97.65) | 88.40) | -0.37)  |        | 122.94) | 109.89) | -0.37)  |        | 90.08) | 82.12) | -0.15)  |        | 85.79) | 78.36) | 0.00)*  |        |
|                    | 1.75   | 1.85   | 0.19    |        | 5.82    | 6.15    | 0.20    |        | 0.72   | 0.75   | 0.09    |        |        |        |         |        |
| Sao Tome and       | (0.00, | (0.01, | (0.12,  | <0.001 | (0.05,  | (0.94,  | (0.17,  | <0.001 | (0.00, | (0.00, | (-0.30, | 0.642  | —      | —      | —       | —      |
| Principe           | 33.34) | 13.28) | 0.25)   |        | 40.94)  | 20.40)  | 0.24)   |        | 31.33) | 11.23) | 0.49)   |        |        |        |         |        |

|                 |        |        |         |        |         |         |         |        |        |        |         |        |        |        |          |        |
|-----------------|--------|--------|---------|--------|---------|---------|---------|--------|--------|--------|---------|--------|--------|--------|----------|--------|
|                 | 2.09   | 2.20   | 0.18    |        | 6.93    | 7.31    | 0.18    |        | 1.00   | 1.23   | 0.75    |        | 0.01   | 0.01   | 0.00     |        |
| Saudi Arabia    | (1.63, | (1.97, | (0.11,  | <0.001 | (6.07,  | (6.88,  | (0.16,  | <0.001 | (0.69, | (1.06, | (0.54,  | <0.001 | (0.00, | (0.00, | (0.00,   | 0.004  |
|                 | 2.64)  | 2.47)  | 0.26)   |        | 7.89)   | 7.77)   | 0.21)   |        | 1.39)  | 1.44)  | 0.96)   |        | 0.13)  | 0.07)  | 0.00)*   |        |
|                 | 1.71   | 1.76   | 0.11    |        | 5.68    | 5.83    | 0.10    |        | 0.63   | 0.75   | 0.55    |        |        |        |          |        |
| Senegal         | (0.98, | (1.26, | (0.04,  | 0.001  | (4.25,  | (4.88,  | (0.05,  | <0.001 | (0.23, | (0.44, | (0.23,  | 0.001  | —      | —      | —        | —      |
|                 | 2.78)  | 2.40)  | 0.17)   |        | 7.44)   | 6.92)   | 0.14)   |        | 1.39)  | 1.20)  | 0.87)   |        |        |        |          |        |
|                 | 4.48   | 4.49   | 0.00    |        | 14.85   | 14.91   | 0.01    |        | 2.28   | 2.11   | -0.26   |        | 0.02   | 0.02   | 0.13     |        |
| Serbia          | (3.58, | (3.54, | (-0.04, | 0.988  | (13.19, | (13.13, | (-0.02, | 0.732  | (1.66, | (1.47, | (-0.90, | 0.438  | (0.00, | (0.00, | (-5.55,  | 0.965  |
|                 | 5.54)  | 5.66)  | 0.04)   |        | 16.69)  | 16.89)  | 0.03)   |        | 3.07)  | 2.96)  | 0.39)   |        | 0.27)  | 0.32)  | 6.15)    |        |
|                 | 2.69   | 2.73   | 0.05    |        | 8.93    | 9.05    | 0.05    |        | 2.20   | 2.18   | 0.09    |        | 0.03   | 0.03   | -0.28    |        |
| Seychelles      | (0.00, | (0.02, | (0.03,  | <0.001 | (0.33,  | (1.37,  | (0.01,  | 0.010  | (0.00, | (0.00, | (-0.95, | 0.863  | (0.00, | (0.00, | (-0.87,  | 0.347  |
|                 | 34.93) | 26.81) | 0.08)   |        | 46.14)  | 35.96)  | 0.08)   |        | 34.08) | 25.98) | 1.14)   |        | 29.78) | 22.74) | 0.32)    |        |
|                 | 1.83   | 1.84   | 0.04    |        | 6.06    | 6.12    | 0.05    |        | 0.66   | 0.73   | 0.34    |        |        |        |          |        |
| Sierra Leone    | (0.87, | (1.18, | (-0.04, | 0.338  | (4.14,  | (4.84,  | (-0.01, | 0.121  | (0.16, | (0.34, | (0.21,  | <0.001 | —      | —      | —        | —      |
|                 | 3.40)  | 2.75)  | 0.12)   |        | 8.57)   | 7.64)   | 0.11)   |        | 1.81)  | 1.37)  | 0.47)   |        |        |        |          |        |
|                 | 5.52   | 5.17   | -0.23   |        | 18.34   | 17.16   | -0.23   |        | 1.85   | 1.72   | -0.26   |        | 0.01   |        |          |        |
| Singapore       | (3.98, | (4.15, | (-0.25, | <0.001 | (15.40, | (15.32, | (-0.25, | <0.001 | (1.01, | (1.17, | (-0.43, | 0.003  | (0.00, | —      | —        | —      |
|                 | 7.49)  | 6.50)  | -0.20)  |        | 21.69)  | 19.29)  | -0.21)  |        | 3.13)  | 2.63)  | -0.09)  |        | 0.56)  |        |          |        |
|                 | 5.38   | 5.22   | -0.09   |        | 17.86   | 17.32   | -0.08   |        | 2.31   | 1.94   | -0.57   |        | 0.01   | 0.01   | -2.27    |        |
| Slovakia        | (4.14, | (4.01, | (-0.21, | 0.176  | (15.54, | (15.07, | (-0.19, | 0.109  | (1.53, | (1.24, | (-0.80, | <0.001 | (0.00, | (0.00, | (-11.27, | 0.642  |
|                 | 6.91)  | 6.78)  | 0.04)   |        | 20.46)  | 19.90)  | 0.02)   |        | 3.39)  | 3.03)  | -0.33)  |        | 0.43)  | 0.61)  | 7.65)    |        |
|                 | 4.97   | 4.80   | -0.11   |        | 16.50   | 15.92   | -0.12   |        | 1.69   | 1.59   | -0.19   |        | 0.01   |        |          |        |
| Slovenia        | (3.14, | (2.95, | (-0.16, | <0.001 | (13.01, | (12.40, | (-0.16, | <0.001 | (0.72, | (0.63, | (-0.44, | 0.145  | (0.00, | —      | —        | —      |
|                 | 7.61)  | 7.76)  | -0.07)  |        | 20.76)  | 20.45)  | -0.08)  |        | 3.52)  | 3.79)  | 0.06)   |        | 1.12)  |        |          |        |
|                 | 2.52   | 2.57   | 0.05    |        | 8.35    | 8.54    | 0.07    |        | 4.60   | 6.11   | 0.98    |        | 0.07   | 0.10   | 1.39     |        |
| Solomon Islands | (0.10, | (0.51, | (-0.04, | 0.285  | (2.17,  | (4.02,  | (0.03,  | 0.001  | (0.63, | (2.43, | (0.85,  | <0.001 | (0.00, | (0.00, | (0.91,   | <0.001 |
|                 | 12.89) | 7.67)  | 0.15)   |        | 21.99)  | 15.91)  | 0.11)   |        | 16.20) | 12.67) | 1.12)   |        | 8.41)  | 3.50)  | 1.88)    |        |
|                 | 1.09   | 1.14   | 0.15    |        | 3.61    | 3.78    | 0.16    |        | 0.81   | 0.74   | -0.31   |        | 0.01   | 0.01   | 0.00     |        |
| Somalia         | (0.57, | (0.79, | (0.05,  | 0.003  | (2.59,  | (3.12,  | (0.14,  | <0.001 | (0.38, | (0.46, | (-0.45, | <0.001 | (0.00, | (0.00, | (0.00,   | <0.001 |
|                 | 1.91)  | 1.59)  | 0.25)   |        | 4.91)   | 4.54)   | 0.18)   |        | 1.56)  | 1.11)  | -0.18)  |        | 0.39)  | 0.14)  | 0.00)*   |        |
|                 | 1.89   | 1.89   | 0.00    |        | 6.27    | 6.26    | -0.00   |        | 2.33   | 1.89   | -0.87   |        | 0.03   | 0.03   | -0.31    |        |
| South Africa    | (1.57, | (1.66, | (-0.04, | 0.918  | (5.66,  | (5.83,  | (-0.02, | 0.776  | (1.97, | (1.66, | (-1.47, | 0.005  | (0.00, | (0.01, | (-2.98,  | 0.821  |
|                 | 2.26)  | 2.14)  | 0.05)   |        | 6.93)   | 6.72)   | 0.02)   |        | 2.73)  | 2.15)  | -0.26)  |        | 0.12)  | 0.07)  | 2.43)    |        |



|                               |        |        |         |        |         |         |         |        |        |        |         |        |        |        |         |        |
|-------------------------------|--------|--------|---------|--------|---------|---------|---------|--------|--------|--------|---------|--------|--------|--------|---------|--------|
|                               | 1.09   | 1.13   | 0.12    |        | 3.61    | 3.74    | 0.12    |        | 0.85   | 0.76   | -0.36   |        | 0.01   | 0.01   | 0.00    |        |
| South Sudan                   | (0.50, | (0.61, | (0.04,  | 0.006  | (2.43,  | (2.73,  | (0.09,  | <0.001 | (0.34, | (0.35, | (-0.51, | <0.001 | (0.00, | (0.00, | (0.00,  | <0.001 |
|                               | 2.06)  | 1.92)  | 0.21)   |        | 5.16)   | 5.01)   | 0.16)   |        | 1.74)  | 1.45)  | -0.21)  |        | 0.48)  | 0.35)  | 0.00)*  |        |
|                               | 6.00   | 5.12   | -0.56   |        | 19.93   | 16.98   | -0.55   |        | 2.36   | 1.82   | -0.91   |        | 0.01   | 0.01   | 0.00    |        |
| Spain                         | (5.44, | (4.65, | (-0.57, | <0.001 | (18.89, | (16.14, | (-0.57, | <0.001 | (2.02, | (1.55, | (-1.04, | <0.001 | (0.00, | (0.00, | (0.00,  | <0.001 |
|                               | 6.61)  | 5.62)  | -0.55)  |        | 21.01)  | 17.86)  | -0.53)  |        | 2.75)  | 2.13)  | -0.77)  |        | 0.08)  | 0.08)  | 0.00)*  |        |
|                               | 2.57   | 2.65   | 0.11    |        | 8.52    | 8.80    | 0.11    |        | 1.05   | 1.07   | 0.14    |        | 0.01   | 0.01   |         |        |
| Sri Lanka                     | (2.06, | (2.18, | (0.05,  | <0.001 | (7.56,  | (7.93,  | (0.07,  | <0.001 | (0.73, | (0.78, | (-0.01, | 0.071  | (0.00, | (0.00, | —       | —      |
|                               | 3.17)  | 3.20)  | 0.17)   |        | 9.56)   | 9.74)   | 0.15)   |        | 1.45)  | 1.43)  | 0.30)   |        | 0.12)  | 0.11)  |         |        |
|                               | 2.14   | 2.28   | 0.22    |        | 7.09    | 7.55    | 0.22    |        | 0.89   | 0.90   | 0.06    |        |        |        |         |        |
| Sudan                         | (1.63, | (1.92, | (0.17,  | <0.001 | (6.13,  | (6.89,  | (0.20,  | <0.001 | (0.57, | (0.68, | (0.01,  | 0.023  | —      | —      | —       | —      |
|                               | 2.75)  | 2.68)  | 0.27)   |        | 8.16)   | 8.26)   | 0.23)   |        | 1.31)  | 1.17)  | 0.11)   |        |        |        |         |        |
|                               | 1.20   | 1.26   | 0.18    |        | 3.98    | 4.19    | 0.18    |        | 1.81   | 1.90   | 0.24    |        | 0.03   | 0.03   | 0.24    |        |
| Suriname                      | (0.01, | (0.07, | (0.13,  | <0.001 | (0.59,  | (1.26,  | (0.15,  | <0.001 | (0.06, | (0.23, | (-1.53, | 0.792  | (0.00, | (0.00, | (-0.61, | 0.567  |
|                               | 8.87)  | 5.93)  | 0.23)   |        | 13.50)  | 10.33)  | 0.21)   |        | 9.85)  | 6.95)  | 2.04)   |        | 6.67)  | 3.73)  | 1.10)   |        |
|                               | 7.40   | 6.76   | -0.41   |        | 24.58   | 22.42   | -0.42   |        | 2.43   | 2.16   | -0.46   |        | 0.01   |        |         |        |
| Sweden                        | (6.14, | (5.62, | (-0.76, | 0.022  | (22.24, | (20.31, | (-0.77, | 0.021  | (1.74, | (1.54, | (-0.76, | 0.003  | (0.00, | —      | —       | —      |
|                               | 8.87)  | 8.08)  | -0.06)  |        | 27.11)  | 24.72)  | -0.06)  |        | 3.34)  | 2.97)  | -0.16)  |        | 0.29)  |        |         |        |
|                               | 5.22   | 4.61   | -0.45   |        | 17.32   | 15.29   | -0.45   |        | 1.93   | 1.63   | -0.60   |        | 0.01   | 0.01   | 0.00    |        |
| Switzerland                   | (4.12, | (3.66, | (-0.56, | <0.001 | (15.26, | (13.52, | (-0.55, | <0.001 | (1.29, | (1.09, | (-0.82, | <0.001 | (0.00, | (0.00, | (0.00,  | <0.001 |
|                               | 6.56)  | 5.78)  | -0.34)  |        | 19.61)  | 17.27)  | -0.35)  |        | 2.83)  | 2.40)  | -0.39)  |        | 0.39)  | 0.37)  | 0.00)*  |        |
|                               | 2.17   | 2.19   | 0.05    |        | 7.20    | 7.28    | 0.04    |        | 0.91   | 0.89   | -0.15   |        | 0.01   |        |         |        |
| Syrian Arab<br>Republic       | (1.53, | (1.60, | (-0.02, | 0.152  | (5.97,  | (6.21,  | (-0.02, | 0.212  | (0.51, | (0.53, | (-0.20, | <0.001 | (0.00, | —      | —       | —      |
|                               | 3.00)  | 2.97)  | 0.11)   |        | 8.62)   | 8.52)   | 0.11)   |        | 1.49)  | 1.45)  | -0.10)  |        | 0.24)  |        |         |        |
|                               | 2.75   | 2.86   | 0.13    |        | 9.12    | 9.48    | 0.13    |        | 0.97   | 1.06   | 0.18    |        |        |        |         |        |
| Taiwan (Province<br>of China) | (2.30, | (2.41, | (0.07,  | <0.001 | (8.29,  | (8.67,  | (0.11,  | <0.001 | (0.71, | (0.79, | (-0.00, | 0.054  | —      | —      | —       | —      |
|                               | 3.26)  | 3.38)  | 0.20)   |        | 10.02)  | 10.37)  | 0.15)   |        | 1.29)  | 1.40)  | 0.36)   |        |        |        |         |        |
|                               | 3.77   | 3.91   | 0.13    |        | 12.50   | 12.98   | 0.13    |        | 1.25   | 1.36   | 0.25    |        |        |        |         |        |
| Tajikistan                    | (2.52, | (3.05, | (0.10,  | <0.001 | (10.09, | (11.35, | (0.11,  | <0.001 | (0.59, | (0.88, | (0.17,  | <0.001 | —      | —      | —       | —      |
|                               | 5.43)  | 4.94)  | 0.15)   |        | 15.33)  | 14.78)  | 0.15)   |        | 2.36)  | 2.03)  | 0.33)   |        |        |        |         |        |
|                               | 2.51   | 2.61   | 0.13    |        | 8.33    | 8.67    | 0.13    |        | 1.23   | 1.48   | 0.66    |        | 0.01   | 0.01   | 0.00    |        |
| Thailand                      | (2.22, | (2.35, | (0.11,  | <0.001 | (7.80,  | (8.20,  | (0.12,  | <0.001 | (1.03, | (1.29, | (0.38,  | <0.001 | (0.00, | (0.00, | (0.00,  | 0.001  |
|                               | 2.82)  | 2.89)  | 0.16)   |        | 8.89)   | 9.16)   | 0.15)   |        | 1.46)  | 1.69)  | 0.94)   |        | 0.05)  | 0.06)  | 0.00)*  |        |

|                        |         |         |         |        |          |          |         |        |          |          |         |        |         |         |         |        |
|------------------------|---------|---------|---------|--------|----------|----------|---------|--------|----------|----------|---------|--------|---------|---------|---------|--------|
|                        | 2.56    | 2.60    | 0.05    |        | 8.50     | 8.62     | 0.05    |        | 1.07     | 1.31     | 0.80    |        | 0.01    | 0.01    | 0.00    |        |
| Timor-Leste            | (0.61,  | (0.79,  | (-0.00, | 0.069  | (4.27,   | (4.82,   | (0.03,  | <0.001 | (0.07,   | (0.19,   | (0.63,  | <0.001 | (0.00,  | (0.00,  | (-0.00, | 1.000  |
|                        | 7.10)   | 6.32)   | 0.11)   |        | 15.19)   | 14.25)   | 0.06)   |        | 4.80)    | 4.43)    | 0.96)   |        | 2.89)   | 2.19)   | 0.00)   |        |
|                        | 1.74    | 1.77    | 0.07    |        | 5.76     | 5.87     | 0.08    |        | 0.68     | 0.74     | 0.38    |        |         |         |         |        |
| Togo                   | (0.74,  | (1.10,  | (0.02,  | 0.012  | (3.74,   | (4.59,   | (0.05,  | <0.001 | (0.14,   | (0.34,   | (0.26,  | <0.001 | —       | —       | —       | —      |
|                        | 3.46)   | 2.69)   | 0.12)   |        | 8.48)    | 7.39)    | 0.11)   |        | 2.00)    | 1.40)    | 0.50)   |        |         |         |         |        |
|                        | 2.61    | 2.68    |         |        | 8.67     | 8.90     | 0.09    |        | 3.91     | 4.85     | 0.74    |        | 0.06    | 0.07    | 0.52    |        |
| Tokelau                | (0.00,  | (0.00,  | (0.04,  | <0.001 | (0.00,   | (0.00,   | (0.05,  | <0.001 | (0.00,   | (0.00,   | (0.65,  | <0.001 | (0.00,  | (0.00,  | (0.52,  | <0.001 |
|                        | 1589.14 | 1804.85 | 0.13)   |        | 1601.39) | 1816.08) | 0.12)   |        | 1591.85) | 1809.30) | 0.84)   |        | 1583.92 | 1799.98 | 0.52)   | <0.001 |
|                        | )       | )       |         |        |          |          |         |        |          |          |         |        | )       | )       |         |        |
|                        | 2.66    | 2.74    | 0.09    |        | 8.84     | 9.09     | 0.09    |        | 2.97     | 3.88     | 0.88    |        | 0.04    | 0.06    | 1.63    |        |
| Tonga                  | (0.00,  | (0.00,  | (0.03,  | 0.001  | (0.21,   | (0.55,   | (0.03,  | 0.003  | (0.00,   | (0.01,   | (0.64,  | <0.001 | (0.00,  | (0.00,  | (0.82,  | <0.001 |
|                        | 39.34)  | 29.92)  | 0.14)   |        | 50.61)   | 41.08)   | 0.14)   |        | 39.79)   | 32.05)   | 1.11)   |        | 34.22)  | 24.62)  | 2.46)   |        |
|                        | 1.25    | 1.27    | 0.06    |        | 4.14     | 4.22     | 0.07    |        | 0.71     | 0.76     | 0.30    |        | 0.01    | 0.01    | 0.00    |        |
| Trinidad and<br>Tobago | (0.24,  | (0.35,  | (-0.02, | 0.121  | (1.92,   | (2.29,   | (0.03,  | <0.001 | (0.06,   | (0.12,   | (-0.01, | 0.056  | (0.00,  | (0.00,  | (0.00,  | <0.001 |
|                        | 3.78)   | 3.61)   | 0.13)   |        | 7.80)    | 7.41)    | 0.11)   |        | 2.94)    | 2.90)    | 0.61)   |        | 1.68)   | 1.78)   | 0.00)*  |        |
|                        | 2.12    | 2.17    | 0.09    |        | 7.03     | 7.22     | 0.10    |        | 0.87     | 0.90     | 0.11    |        |         | 0.01    |         |        |
| Tunisia                | (1.41,  | (1.64,  | (-0.01, | 0.074  | (5.66,   | (6.22,   | (-0.05, | 0.203  | (0.44,   | (0.57,   | (-0.03, | 0.114  | —       | (0.00,  | —       | —      |
|                        | 3.06)   | 2.84)   | 0.18)   |        | 8.63)    | 8.34)    | 0.24)   |        | 1.54)    | 1.37)    | 0.26)   |        |         | 0.20)   |         |        |
|                        | 2.30    | 2.30    | -0.00   |        | 7.62     | 7.62     | -0.01   |        | 1.13     | 0.89     | -0.84   |        | 0.01    |         |         |        |
| Turkey                 | (2.02,  | (2.09,  | (-0.04, | 0.904  | (7.10,   | (7.23,   | (-0.03, | 0.494  | (0.94,   | (0.76,   | (-1.05, | <0.001 | (0.00,  | —       | —       | —      |
|                        | 2.61)   | 2.52)   | 0.04)   |        | 8.17)    | 8.02)    | 0.01)   |        | 1.36)    | 1.03)    | -0.63)  |        | 0.05)   |         |         |        |
|                        | 3.82    | 4.08    | 0.23    |        | 12.68    | 13.55    | 0.23    |        | 1.32     | 1.54     | 0.57    |        |         | 0.01    |         |        |
| Turkmenistan           | (2.41,  | (2.97,  | (0.21,  | <0.001 | (9.94,   | (11.45,  | (0.22,  | <0.001 | (0.56,   | (0.89,   | (0.49,  | <0.001 | —       | (0.00,  | —       | —      |
|                        | 5.77)   | 5.49)   | 0.25)   |        | 15.95)   | 15.95)   | 0.24)   |        | 2.65)    | 2.50)    | 0.65)   |        |         | 0.40)   |         |        |
|                        | 2.60    | 2.68    | 0.09    |        | 8.63     | 8.90     | 0.10    |        | 4.87     | 6.74     | 1.12    |        | 0.08    | 0.11    | 1.29    |        |
| Tuvalu                 | (0.00,  | (0.00,  | (-0.01, | 0.063  | (0.00,   | (0.00,   | (0.05,  | <0.001 | (0.00,   | (0.00,   | (1.05,  | <0.001 | (0.00,  | (0.00,  | (1.07,  | <0.001 |
|                        | 251.86) | 170.86) | 0.18)   |        | 264.20)  | 183.40)  | 0.15)   |        | 256.42)  | 178.84)  | 1.19)   |        | 246.64) | 165.58) | 1.50)   |        |
|                        | 1.14    | 1.16    | 0.06    |        | 3.77     | 3.85     | 0.07    |        | 0.80     | 0.97     | 0.64    |        | 0.01    | 0.01    | 0.00    |        |
| Uganda                 | (0.73,  | (0.89,  | (0.01,  | 0.017  | (2.98,   | (3.33,   | (0.02,  | 0.005  | (0.46,   | (0.72,   | (0.53,  | <0.001 | (0.00,  | (0.00,  | (0.00,  | <0.001 |
|                        | 1.69)   | 1.50)   | 0.12)   |        | 4.71)    | 4.43)    | 0.12)   |        | 1.28)    | 1.28)    | 0.76)   |        | 0.20)   | 0.10)   | 0.00)*  |        |
|                        | 4.83    | 5.14    | 0.21    |        | 16.04    | 17.07    | 0.21    |        | 1.52     | 1.80     | 0.59    |        |         | 0.01    |         |        |
| Ukraine                | (4.42,  | (4.70,  | (0.19,  | <0.001 | (15.29,  | (16.27,  | (0.20,  | <0.001 | (1.29,   | (1.55,   | (0.46,  | <0.001 | —       | (0.00,  | —       | —      |

|                    |        |        |         |        |         |         |         |        |        |        |         |        |        |        |         |        |
|--------------------|--------|--------|---------|--------|---------|---------|---------|--------|--------|--------|---------|--------|--------|--------|---------|--------|
|                    | 5.27)  | 5.63)  | 0.24)   |        | 16.83)  | 17.92)  | 0.22)   | 1.77)  | 2.10)  | 0.73)  |         | 0.08)  |        |        |         |        |
| United Arab        | 2.31   | 2.30   | -0.02   |        | 7.68    | 7.64    | -0.02   | 1.02   | 1.15   | 0.23   |         | 0.01   | 0.01   | 0.00   |         |        |
| Emirates           | (1.43, | (1.97, | (-0.07, | 0.389  | (5.97,  | (7.02,  | (-0.04, | 0.049  | (0.47, | (0.92, | (-0.14, | 0.216  | (0.00, | (0.00, | (-0.00, | 1.000  |
|                    | 3.97)  | 2.87)  | 0.03)   |        | 10.06)  | 8.46)   | 0.00)   |        | 2.44)  | 1.65)  | 0.60)   |        | 1.26)  | 0.46)  | 0.00)   |        |
| United Kingdom     | 6.26   | 7.18   | 0.49    |        | 20.78   | 23.85   | 0.49    |        | 2.11   | 2.41   | 0.47    |        | 0.01   | 0.01   | 0.00    |        |
|                    | (5.79, | (6.73, | (0.34,  | <0.001 | (19.92, | (23.02, | (0.35,  | <0.001 | (1.85, | (2.15, | (0.36,  | <0.001 | (0.00, | (0.00, | (0.00,  | <0.001 |
|                    | 6.76)  | 7.67)  | 0.64)   |        | 21.67)  | 24.72)  | 0.64)   |        | 2.41)  | 2.70)  | 0.59)   |        | 0.05)  | 0.05)  | 0.00)*  |        |
| United Republic of | 1.22   | 1.26   | 0.12    |        | 4.05    | 4.20    | 0.13    |        | 0.98   | 0.91   | -0.30   |        | 0.01   | 0.01   | 0.00    |        |
| Tanzania           | (0.88, | (1.03, | (0.03,  | 0.009  | (3.39,  | (3.76,  | (0.10,  | <0.001 | (0.67, | (0.71, | (-0.46, | <0.001 | (0.00, | (0.00, | (0.00,  | 0.006  |
|                    | 1.66)  | 1.53)  | 0.21)   |        | 4.80)   | 4.66)   | 0.15)   |        | 1.38)  | 1.14)  | -0.15)  |        | 0.14)  | 0.06)  | 0.00)*  |        |
| United States of   | 6.60   | 8.08   | 0.71    |        | 21.90   | 26.81   | 0.71    |        | 2.22   | 2.75   | 0.74    |        | 0.01   | 0.01   | 0.00    |        |
| America            | (6.39, | (7.85, | (0.61,  | <0.001 | (21.51, | (26.40, | (0.62,  | <0.001 | (2.10, | (2.62, | (0.62,  | <0.001 | (0.00, | (0.00, | (0.00,  | <0.001 |
|                    | 6.81)  | 8.31)  | 0.81)   |        | 22.29)  | 27.23)  | 0.80)   |        | 2.34)  | 2.89)  | 0.86)   |        | 0.02)  | 0.02)  | 0.00)*  |        |
| United States      | 1.22   | 1.26   | 0.13    |        | 4.06    | 4.20    | 0.12    |        | 2.21   | 1.61   | -1.16   |        | 0.03   | 0.02   | -1.94   |        |
| Virgin Islands     | (0.00, | (0.00, | (0.06,  | <0.001 | (0.04,  | (0.02,  | (0.09,  | <0.001 | (0.00, | (0.00, | (-1.97, | 0.005  | (0.00, | (0.00, | (-5.42, | 0.288  |
|                    | 24.06) | 30.00) | 0.19)   |        | 29.10)  | 35.01)  | 0.16)   |        | 25.93) | 30.66) | -0.34)  |        | 21.78) | 27.75) | 1.67)   |        |
| Uruguay            | 3.03   | 3.09   | 0.06    |        | 10.04   | 10.27   | 0.08    |        | 1.12   | 1.11   | -0.10   |        |        |        |         |        |
|                    | (1.74, | (1.86, | (0.00,  | 0.042  | (7.55,  | (7.90,  | (0.02,  | 0.005  | (0.41, | (0.44, | (-0.26, | 0.178  | —      | —      | —       | —      |
|                    | 4.88)  | 4.84)  | 0.12)   |        | 13.09)  | 13.13)  | 0.13)   |        | 2.43)  | 2.32)  | 0.05)   |        |        |        |         |        |
| Uzbekistan         | 3.66   | 3.96   | 0.27    |        | 12.13   | 13.16   | 0.28    |        | 1.24   | 1.49   | 0.60    |        |        | 0.01   |         |        |
|                    | (3.05, | (3.51, | (0.24,  | <0.001 | (10.99, | (12.31, | (0.26,  | <0.001 | (0.89, | (1.22, | (0.46,  | <0.001 | —      | (0.00, | —       | —      |
|                    | 4.35)  | 4.46)  | 0.30)   |        | 13.37)  | 14.05)  | 0.30)   |        | 1.68)  | 1.81)  | 0.73)   |        |        | 0.07)  |         |        |
| Vanuatu            | 2.76   | 2.73   | -0.04   |        | 9.14    | 9.07    | -0.02   |        | 4.25   | 6.38   | 1.39    |        | 0.06   | 0.10   | 1.58    |        |
|                    | (0.01, | (0.16, | (-0.08, | 0.135  | (1.26,  | (2.70,  | (-0.05, | 0.036  | (0.12, | (1.42, | (1.29,  | <0.001 | (0.00, | (0.00, | (0.87,  | <0.001 |
|                    | 20.89) | 12.55) | 0.01)   |        | 31.57)  | 22.21)  | -0.00)  |        | 23.50) | 18.18) | 1.49)   |        | 15.70) | 7.78)  | 2.30)   |        |
| Venezuela          | 1.28   | 1.28   | -0.00   |        | 4.25    | 4.24    | -0.01   |        | 0.67   | 0.73   | 0.34    |        | 0.01   | 0.01   | 0.00    |        |
| (Bolivarian        | (0.93, | (1.00, | (-0.09, | 0.967  | (3.58,  | (3.72,  | (-0.05, | 0.705  | (0.42, | (0.53, | (-0.05, | 0.084  | (0.00, | (0.00, | (0.00,  | <0.001 |
| Republic of)       | 1.73)  | 1.61)  | 0.09)   |        | 5.02)   | 4.81)   | 0.03)   |        | 1.01)  | 1.00)  | 0.72)   |        | 0.12)  | 0.09)  | 0.00)*  |        |
| Viet Nam           | 2.57   | 2.80   | 0.30    |        | 8.52    | 9.30    | 0.30    |        | 1.55   | 1.74   | 0.40    |        | 0.02   | 0.02   | 0.00    |        |
|                    | (2.27, | (2.59, | (0.25,  | <0.001 | (7.97,  | (8.90,  | (0.27,  | <0.001 | (1.33, | (1.58, | (0.24,  | <0.001 | (0.00, | (0.00, | (0.00,  | <0.001 |
|                    | 2.89)  | 3.03)  | 0.34)   |        | 9.10)   | 9.71)   | 0.33)   |        | 1.81)  | 1.93)  | 0.56)   |        | 0.06)  | 0.05)  | 0.00)*  |        |
| Yemen              | 2.08   | 2.13   | 0.08    |        | 6.91    | 7.06    | 0.08    |        | 0.82   | 0.86   | 0.16    |        |        |        |         |        |
|                    | (1.47, | (1.77, | (0.02,  | 0.015  | (5.74,  | (6.39,  | (0.06,  | <0.001 | (0.46, | (0.64, | (0.11,  | <0.001 | —      | —      | —       | —      |

|                        |        |        |         |       |        |        |        |        |        |        |         |        |        |        |         |        |
|------------------------|--------|--------|---------|-------|--------|--------|--------|--------|--------|--------|---------|--------|--------|--------|---------|--------|
|                        | 2.87)  | 2.54)  | 0.14)   |       | 8.24)  | 7.78)  | 0.10)  |        | 1.36)  | 1.14)  | 0.20)   |        |        |        |         |        |
|                        | 1.11   | 1.13   | 0.08    |       | 3.68   | 3.76   | 0.08   |        | 0.74   | 1.03   | 1.15    |        | 0.01   | 0.01   | 0.00    |        |
| Zambia                 | (0.54, | (0.78, | (-0.01, | 0.075 | (2.55, | (3.09, | (0.05, | <0.001 | (0.30, | (0.70, | (1.03,  | <0.001 | (0.00, | (0.00, | (0.00,  | <0.001 |
|                        | 2.02)  | 1.60)  | 0.18)   |       | 5.14)  | 4.55)  | 0.11)  |        | 1.53)  | 1.48)  | 1.27)   |        | 0.42)  | 0.16)  | 0.00)*  |        |
|                        | 1.63   | 1.68   | 0.12    |       | 5.42   | 5.58   | 0.11   |        | 0.66   | 0.74   | 0.45    |        |        |        |         |        |
| Zimbabwe               | (1.02, | (1.21, | (0.01,  | 0.035 | (4.23, | (4.69, | (0.01, | 0.028  | (0.30, | (0.44, | (0.16,  | 0.002  | —      | —      | —       | —      |
|                        | 2.49)  | 2.28)  | 0.22)   |       | 6.85)  | 6.60)  | 0.20)  |        | 1.28)  | 1.17)  | 0.75)   |        |        |        |         |        |
| <b>Aortic aneurysm</b> |        |        |         |       |        |        |        |        |        |        |         |        |        |        |         |        |
| <b>Overall</b>         |        |        |         |       |        |        |        |        |        |        |         |        |        |        |         |        |
|                        |        |        |         |       |        |        |        |        | 5.00   | 5.34   | 0.26    |        | 0.09   | 0.09   | -0.00   |        |
| Afghanistan            | —      | —      | —       | —     | —      | —      | —      | —      | (4.20, | (4.93, | (0.15,  | <0.001 | (0.01, | (0.05, | (-0.00, | <0.001 |
|                        |        |        |         |       |        |        |        |        | 5.92)  | 5.77)  | 0.36)   |        | 0.32)  | 0.17)  | -0.00)* |        |
|                        |        |        |         |       |        |        |        |        | 7.57   | 9.54   | 0.72    |        | 0.13   | 0.16   | 0.65    |        |
| Albania                | —      | —      | —       | —     | —      | —      | —      | —      | (6.18, | (7.69, | (0.22,  | 0.004  | (0.01, | (0.01, | (-0.29, | 0.175  |
|                        |        |        |         |       |        |        |        |        | 9.20)  | 11.71) | 1.22)   |        | 0.54)  | 0.70)  | 1.59)   |        |
|                        |        |        |         |       |        |        |        |        | 6.63   | 5.39   | -0.62   |        | 0.11   | 0.09   | -0.68   |        |
| Algeria                | —      | —      | —       | —     | —      | —      | —      | —      | (6.11, | (5.06, | (-0.83, | <0.001 | (0.05, | (0.05, | (-0.68, | <0.001 |
|                        |        |        |         |       |        |        |        |        | 7.20)  | 5.75)  | -0.41)  |        | 0.21)  | 0.15)  | -0.68)  |        |
|                        |        |        |         |       |        |        |        |        | 14.20  | 10.25  | -1.04   |        | 0.25   | 0.18   | -1.04   |        |
| American Samoa         | —      | —      | —       | —     | —      | —      | —      | —      | (2.37, | (1.04, | (-1.78, | 0.007  | (0.00, | (0.00, | (-1.72, | 0.003  |
|                        |        |        |         |       |        |        |        |        | 46.91) | 40.93) | -0.29)  |        | 23.76) | 23.70) | -0.35)  |        |
|                        |        |        |         |       |        |        |        |        | 13.08  | 11.03  | -0.60   |        | 0.23   | 0.19   | -0.59   |        |
| Andorra                | —      | —      | —       | —     | —      | —      | —      | —      | (3.10, | (2.38, | (-0.65, | <0.001 | (0.00, | (0.00, | (-0.71, | <0.001 |
|                        |        |        |         |       |        |        |        |        | 39.89) | 35.65) | -0.54)  |        | 20.80) | 19.57) | -0.47)  |        |
|                        |        |        |         |       |        |        |        |        | 10.50  | 9.50   | -0.30   |        | 0.18   | 0.17   | -0.15   |        |
| Angola                 | —      | —      | —       | —     | —      | —      | —      | —      | (9.46, | (8.90, | (-1.11, | 0.477  | (0.07, | (0.09, | (-1.10, | 0.764  |
|                        |        |        |         |       |        |        |        |        | 11.63) | 10.13) | 0.52)   |        | 0.40)  | 0.27)  | 0.82)   |        |
|                        |        |        |         |       |        |        |        |        | 5.72   | 4.20   | -1.01   |        | 0.10   | 0.07   | -1.30   |        |
| Antigua and Barbuda    | —      | —      | —       | —     | —      | —      | —      | —      | (0.36, | (0.30, | (-1.74, | 0.007  | (0.00, | (0.00, | (-2.00, | <0.001 |
|                        |        |        |         |       |        |        |        |        | 26.59) | 19.04) | -0.28)  |        | 16.74) | 11.94) | -0.60)  |        |
|                        |        |        |         |       |        |        |        |        | 9.91   | 8.90   | -0.37   |        | 0.17   | 0.16   | -0.30   |        |
| Argentina              | —      | —      | —       | —     | —      | —      | —      | —      | (9.36, | (8.47, | (-0.72, | 0.033  | (0.11, | (0.10, | (-0.78, | 0.228  |
|                        |        |        |         |       |        |        |        |        | 10.49) | 9.35)  | -0.03)  |        | 0.26)  | 0.23)  | 0.19)   |        |

|            |   |   |   |   |   |   |   |   |   |         |         |         |        |        |        |         |        |
|------------|---|---|---|---|---|---|---|---|---|---------|---------|---------|--------|--------|--------|---------|--------|
|            |   |   |   |   |   |   |   |   |   | 11.98   | 16.58   | 1.21    |        | 0.21   | 0.30   | 1.29    |        |
| Armenia    | — | — | — | — | — | — | — | — | — | (10.25, | (14.39, | (0.26,  | 0.013  | (0.05, | (0.08, | (0.47,  | 0.002  |
|            |   |   |   |   |   |   |   |   |   | 13.91)  | 19.06)  | 2.17)   |        | 0.64)  | 0.91)  | 2.11)   |        |
|            |   |   |   |   |   |   |   |   |   | 10.24   | 5.33    | -2.24   |        | 0.18   | 0.09   | -2.39   |        |
| Australia  | — | — | — | — | — | — | — | — | — | (9.50,  | (4.86,  | (-2.64, | <0.001 | (0.09, | (0.04, | (-3.23, | <0.001 |
|            |   |   |   |   |   |   |   |   |   | 11.02)  | 5.83)   | -1.83)  |        | 0.31)  | 0.19)  | -1.54)  |        |
|            |   |   |   |   |   |   |   |   |   | 16.59   | 10.12   | -1.67   |        | 0.29   | 0.18   | -1.68   |        |
| Austria    | — | — | — | — | — | — | — | — | — | (15.17, | (9.02,  | (-2.12, | <0.001 | (0.13, | (0.06, | (-2.18, | <0.001 |
|            |   |   |   |   |   |   |   |   |   | 18.12)  | 11.33)  | -1.22)  |        | 0.57)  | 0.43)  | -1.19)  |        |
|            |   |   |   |   |   |   |   |   |   | 3.69    | 3.82    | -0.01   |        | 0.07   | 0.07   | -0.28   |        |
| Azerbaijan | — | — | — | — | — | — | — | — | — | (3.02,  | (3.27,  | (-0.88, | 0.978  | (0.01, | (0.01, | (-1.96, | 0.741  |
|            |   |   |   |   |   |   |   |   |   | 4.48)   | 4.46)   | 0.86)   |        | 0.26)  | 0.22)  | 1.42)   |        |
|            |   |   |   |   |   |   |   |   |   | 12.08   | 13.74   | 0.48    |        | 0.21   | 0.24   | 0.33    |        |
| Bahamas    | — | — | — | — | — | — | — | — | — | (6.44,  | (8.51,  | (-0.19, | 0.163  | (0.00, | (0.00, | (-0.52, | 0.442  |
|            |   |   |   |   |   |   |   |   |   | 20.86)  | 21.09)  | 1.17)   |        | 4.31)  | 3.10)  | 1.19)   |        |
|            |   |   |   |   |   |   |   |   |   | 4.99    | 4.27    | -0.57   |        | 0.09   | 0.07   | -0.73   |        |
| Bahrain    | — | — | — | — | — | — | — | — | — | (2.65,  | (2.80,  | (-1.17, | 0.060  | (0.00, | (0.00, | (-1.70, | 0.143  |
|            |   |   |   |   |   |   |   |   |   | 8.91)   | 6.40)   | 0.02)   |        | 2.31)  | 1.07)  | 0.25)   |        |
|            |   |   |   |   |   |   |   |   |   | 5.03    | 5.19    | 0.14    |        | 0.09   | 0.09   | 0.07    |        |
| Bangladesh | — | — | — | — | — | — | — | — | — | (4.80,  | (5.02,  | (-0.47, | 0.650  | (0.06, | (0.07, | (-0.35, | 0.753  |
|            |   |   |   |   |   |   |   |   |   | 5.26)   | 5.37)   | 0.76)   |        | 0.12)  | 0.12)  | 0.49)   |        |
|            |   |   |   |   |   |   |   |   |   | 6.73    | 5.60    | -0.65   |        | 0.12   | 0.10   | -0.61   |        |
| Barbados   | — | — | — | — | — | — | — | — | — | (2.78,  | (2.01,  | (-1.26, | 0.039  | (0.00, | (0.00, | (-2.11, | 0.426  |
|            |   |   |   |   |   |   |   |   |   | 13.75)  | 12.61)  | -0.03)  |        | 3.82)  | 4.25)  | 0.90)   |        |
|            |   |   |   |   |   |   |   |   |   | 6.48    | 10.37   | 1.66    |        | 0.11   | 0.18   | 1.60    |        |
| Belarus    | — | — | — | — | — | — | — | — | — | (5.73,  | (9.32,  | (0.90,  | <0.001 | (0.03, | (0.07, | (0.66,  | 0.001  |
|            |   |   |   |   |   |   |   |   |   | 7.31)   | 11.54)  | 2.43)   |        | 0.28)  | 0.43)  | 2.55)   |        |
|            |   |   |   |   |   |   |   |   |   | 10.67   | 5.52    | -2.24   |        | 0.18   | 0.10   | -2.00   |        |
| Belgium    | — | — | — | — | — | — | — | — | — | (9.66,  | (4.79,  | (-2.57, | <0.001 | (0.08, | (0.02, | (-2.75, | <0.001 |
|            |   |   |   |   |   |   |   |   |   | 11.76)  | 6.33)   | -1.90)  |        | 0.39)  | 0.28)  | -1.25)  |        |
|            |   |   |   |   |   |   |   |   |   | 3.63    | 4.76    | 0.96    |        | 0.06   | 0.08   | 0.81    |        |
| Belize     | — | — | — | — | — | — | — | — | — | (0.52,  | (2.05,  | (0.49,  | <0.001 | (0.00, | (0.00, | (0.06,  | 0.034  |
|            |   |   |   |   |   |   |   |   |   | 13.25)  | 9.48)   | 1.43)   |        | 7.48)  | 2.54)  | 1.56)   |        |

|                   |   |   |   |   |   |   |   |   |   |         |         |         |        |        |        |         |        |
|-------------------|---|---|---|---|---|---|---|---|---|---------|---------|---------|--------|--------|--------|---------|--------|
|                   |   |   |   |   |   |   |   |   |   | 7.76    | 6.83    | -0.45   |        | 0.14   | 0.12   | -0.46   |        |
| Benin             | — | — | — | — | — | — | — | — | — | (6.40,  | (6.06,  | (-0.56, | <0.001 | (0.02, | (0.04, | (-0.69, | <0.001 |
|                   |   |   |   |   |   |   |   |   |   | 9.35)   | 7.68)   | -0.34)  |        | 0.52)  | 0.29)  | -0.23)  |        |
|                   |   |   |   |   |   |   |   |   |   | 14.27   | 7.63    | -2.14   |        | 0.25   | 0.13   | -2.65   |        |
| Bermuda           | — | — | — | — | — | — | — | — | — | (3.76,  | (0.55,  | (-2.67, | <0.001 | (0.00, | (0.00, | (-2.86, | <0.001 |
|                   |   |   |   |   |   |   |   |   |   | 41.20)  | 38.18)  | -1.60)  |        | 20.62) | 26.42) | -2.44)  |        |
|                   |   |   |   |   |   |   |   |   |   | 4.14    | 4.88    | 0.60    |        | 0.07   | 0.09   | 0.95    |        |
| Bhutan            | — | — | — | — | — | — | — | — | — | (1.86,  | (2.85,  | (0.49,  | <0.001 | (0.00, | (0.00, | (0.95,  | <0.001 |
|                   |   |   |   |   |   |   |   |   |   | 8.12)   | 7.85)   | 0.70)   |        | 2.24)  | 1.31)  | 0.95)   |        |
| Bolivia           |   |   |   |   |   |   |   |   |   | 7.47    | 6.67    | -0.37   |        | 0.13   | 0.11   | -0.55   |        |
| (Plurinational    | — | — | — | — | — | — | — | — | — | (6.39,  | (5.95,  | (-0.58, | 0.001  | (0.03, | (0.04, | (-0.80, | <0.001 |
| State of)         |   |   |   |   |   |   |   |   |   | 8.70)   | 7.45)   | -0.15)  |        | 0.39)  | 0.26)  | -0.30)  |        |
|                   |   |   |   |   |   |   |   |   |   | 14.72   | 16.14   | 0.28    |        | 0.27   | 0.29   | 0.26    |        |
| Bosnia and        | — | — | — | — | — | — | — | — | — | (13.07, | (13.89, | (-0.15, | 0.202  | (0.09, | (0.07, | (-0.27, | 0.335  |
| Herzegovina       |   |   |   |   |   |   |   |   |   | 16.52)  | 18.69)  | 0.72)   |        | 0.62)  | 0.88)  | 0.79)   |        |
|                   |   |   |   |   |   |   |   |   |   | 13.34   | 10.94   | -0.66   |        | 0.23   | 0.19   | -0.64   |        |
| Botswana          | — | — | — | — | — | — | — | — | — | (10.11, | (9.06,  | (-0.90, | <0.001 | (0.01, | (0.02, | (-1.17, | 0.020  |
|                   |   |   |   |   |   |   |   |   |   | 17.32)  | 13.12)  | -0.42)  |        | 1.43)  | 0.70)  | -0.10)  |        |
|                   |   |   |   |   |   |   |   |   |   | 15.57   | 18.75   | 0.69    |        | 0.28   | 0.33   | 0.53    |        |
| Brazil            | — | — | — | — | — | — | — | — | — | (15.25, | (18.46, | (0.49,  | <0.001 | (0.24, | (0.29, | (0.31,  | <0.001 |
|                   |   |   |   |   |   |   |   |   |   | 15.90)  | 19.03)  | 0.89)   |        | 0.32)  | 0.37)  | 0.76)   |        |
|                   |   |   |   |   |   |   |   |   |   | 21.66   | 16.77   | -0.88   |        | 0.38   | 0.30   | -0.80   |        |
| Brunei Darussalam | — | — | — | — | — | — | — | — | — | (14.22, | (11.77, | (-1.22, | <0.001 | (0.00, | (0.00, | (-1.27, | 0.001  |
|                   |   |   |   |   |   |   |   |   |   | 31.72)  | 23.38)  | -0.54)  |        | 4.01)  | 2.73)  | -0.32)  |        |
|                   |   |   |   |   |   |   |   |   |   | 21.93   | 31.95   | 1.39    |        | 0.37   | 0.55   | 1.45    |        |
| Bulgaria          | — | — | — | — | — | — | — | — | — | (20.29, | (29.54, | (0.86,  | <0.001 | (0.19, | (0.28, | (0.90,  | <0.001 |
|                   |   |   |   |   |   |   |   |   |   | 23.66)  | 34.53)  | 1.92)   |        | 0.67)  | 1.00)  | 2.01)   |        |
|                   |   |   |   |   |   |   |   |   |   | 5.83    | 5.42    | -0.24   |        | 0.11   | 0.10   | -0.07   |        |
| Burkina Faso      | — | — | — | — | — | — | — | — | — | (4.94,  | (4.90,  | (-0.51, | 0.089  | (0.02, | (0.04, | (-1.18, | 0.903  |
|                   |   |   |   |   |   |   |   |   |   | 6.85)   | 5.98)   | 0.04)   |        | 0.33)  | 0.20)  | 1.05)   |        |
|                   |   |   |   |   |   |   |   |   |   | 16.30   | 8.83    | -2.13   |        | 0.28   | 0.15   | -2.16   |        |
| Burundi           | — | — | — | — | — | — | — | — | — | (14.53, | (7.95,  | (-2.36, | <0.001 | (0.09, | (0.06, | (-2.44, | <0.001 |
|                   |   |   |   |   |   |   |   |   |   | 18.25)  | 9.78)   | -1.89)  |        | 0.67)  | 0.33)  | -1.88)  |        |

|                             |   |   |   |   |   |   |   |   |   |         |         |         |        |        |        |         |        |
|-----------------------------|---|---|---|---|---|---|---|---|---|---------|---------|---------|--------|--------|--------|---------|--------|
|                             |   |   |   |   |   |   |   |   |   | 7.54    | 7.41    | -0.09   |        | 0.13   | 0.13   | -0.05   |        |
| Cabo Verde                  | — | — | — | — | — | — | — | — | — | (3.14,  | (4.42,  | (-0.56, | 0.708  | (0.00, | (0.00, | (-0.52, | 0.831  |
|                             |   |   |   |   |   |   |   |   |   | 15.82)  | 11.70)  | 0.38)   |        | 5.16)  | 1.86)  | 0.42)   |        |
|                             |   |   |   |   |   |   |   |   |   | 3.69    | 4.25    | 0.51    |        | 0.06   | 0.07   | 0.52    |        |
| Cambodia                    | — | — | — | — | — | — | — | — | — | (3.08,  | (3.78,  | (0.41,  | <0.001 | (0.01, | (0.02, | (0.52,  | <0.001 |
|                             |   |   |   |   |   |   |   |   |   | 4.41)   | 4.77)   | 0.61)   |        | 0.24)  | 0.17)  | 0.52)   |        |
|                             |   |   |   |   |   |   |   |   |   | 7.88    | 8.09    | 0.09    |        | 0.14   | 0.14   | -0.05   |        |
| Cameroon                    | — | — | — | — | — | — | — | — | — | (6.92,  | (7.56,  | (-0.12, | 0.388  | (0.04, | (0.08, | (-0.54, | 0.838  |
|                             |   |   |   |   |   |   |   |   |   | 8.94)   | 8.65)   | 0.30)   |        | 0.36)  | 0.24)  | 0.44)   |        |
|                             |   |   |   |   |   |   |   |   |   | 10.36   | 6.54    | -1.56   |        | 0.18   | 0.11   | -1.72   |        |
| Canada                      | — | — | — | — | — | — | — | — | — | (9.78,  | (6.09,  | (-1.88, | <0.001 | (0.11, | (0.06, | (-2.46, | <0.001 |
|                             |   |   |   |   |   |   |   |   |   | 10.97)  | 7.01)   | -1.24)  |        | 0.28)  | 0.20)  | -0.97)  |        |
|                             |   |   |   |   |   |   |   |   |   | 10.68   | 8.60    | -0.84   |        | 0.19   | 0.15   | -0.94   |        |
| Central African<br>Republic | — | — | — | — | — | — | — | — | — | (8.66,  | (7.31,  | (-1.24, | <0.001 | (0.02, | (0.03, | (-1.16, | <0.001 |
|                             |   |   |   |   |   |   |   |   |   | 13.07)  | 10.06)  | -0.44)  |        | 0.81)  | 0.48)  | -0.72)  |        |
|                             |   |   |   |   |   |   |   |   |   | 6.04    | 5.61    | -0.18   |        | 0.11   | 0.10   | -0.11   |        |
| Chad                        | — | — | — | — | — | — | — | — | — | (4.95,  | (4.95,  | (-0.42, | 0.136  | (0.01, | (0.03, | (-0.87, | 0.769  |
|                             |   |   |   |   |   |   |   |   |   | 7.31)   | 6.34)   | 0.06)   |        | 0.42)  | 0.25)  | 0.65)   |        |
|                             |   |   |   |   |   |   |   |   |   | 9.29    | 12.47   | 1.15    |        | 0.16   | 0.21   | 1.18    |        |
| Chile                       | — | — | — | — | — | — | — | — | — | (8.50,  | (11.65, | (0.83,  | <0.001 | (0.07, | (0.12, | (0.70,  | <0.001 |
|                             |   |   |   |   |   |   |   |   |   | 10.13)  | 13.33)  | 1.48)   |        | 0.31)  | 0.36)  | 1.66)   |        |
|                             |   |   |   |   |   |   |   |   |   | 6.19    | 6.60    | 0.23    |        | 0.11   | 0.12   | 0.34    |        |
| China                       | — | — | — | — | — | — | — | — | — | (6.13,  | (6.53,  | (-0.17, | 0.262  | (0.10, | (0.11, | (-0.15, | 0.176  |
|                             |   |   |   |   |   |   |   |   |   | 6.26)   | 6.67)   | 0.63)   |        | 0.12)  | 0.13)  | 0.83)   |        |
|                             |   |   |   |   |   |   |   |   |   | 15.02   | 13.33   | -0.41   |        | 0.26   | 0.23   | -0.44   |        |
| Colombia                    | — | — | — | — | — | — | — | — | — | (14.36, | (12.82, | (-0.92, | 0.116  | (0.18, | (0.17, | (-0.88, | 0.050  |
|                             |   |   |   |   |   |   |   |   |   | 15.70)  | 13.86)  | 0.10)   |        | 0.37)  | 0.31)  | 0.00)   |        |
|                             |   |   |   |   |   |   |   |   |   | 12.57   | 9.54    | -0.93   |        | 0.22   | 0.17   | -0.89   |        |
| Comoros                     | — | — | — | — | — | — | — | — | — | (7.44,  | (6.27,  | (-3.34, | 0.456  | (0.00, | (0.00, | (-3.20, | 0.455  |
|                             |   |   |   |   |   |   |   |   |   | 20.14)  | 13.95)  | 1.54)   |        | 3.55)  | 1.75)  | 1.47)   |        |
|                             |   |   |   |   |   |   |   |   |   | 14.67   | 9.36    | -1.60   |        | 0.26   | 0.16   | -1.51   |        |
| Congo                       | — | — | — | — | — | — | — | — | — | (12.12, | (8.09,  | (-2.20, | <0.001 | (0.03, | (0.04, | (-2.01, | <0.001 |
|                             |   |   |   |   |   |   |   |   |   | 17.62)  | 10.79)  | -1.00)  |        | 0.98)  | 0.46)  | -1.01)  |        |

|                                             |   |   |   |   |   |   |   |   |         |         |         |        |        |        |         |        |
|---------------------------------------------|---|---|---|---|---|---|---|---|---------|---------|---------|--------|--------|--------|---------|--------|
|                                             |   |   |   |   |   |   |   |   | 21.34   | 18.09   | -0.57   |        | 0.38   | 0.32   | -0.53   |        |
| Cook Islands                                | — | — | — | — | — | — | — | — | (1.46,  | (0.50,  | (-0.71, | <0.001 | (0.00, | (0.00, | (-0.68, | <0.001 |
|                                             |   |   |   |   |   |   |   |   | 97.49)  | 100.10) | -0.43)  |        | 61.24) | 67.20) | -0.37)  |        |
|                                             |   |   |   |   |   |   |   |   | 10.98   | 18.26   | 1.81    |        | 0.19   | 0.31   | 1.77    |        |
| Costa Rica                                  | — | — | — | — | — | — | — | — | (9.21,  | (16.41, | (0.65,  | 0.002  | (0.03, | (0.12, | (0.80,  | <0.001 |
|                                             |   |   |   |   |   |   |   |   | 13.01)  | 20.27)  | 2.99)   |        | 0.66)  | 0.69)  | 2.76)   |        |
|                                             |   |   |   |   |   |   |   |   | 8.62    | 7.19    | -0.59   |        | 0.15   | 0.13   | -0.46   |        |
| Cote d'Ivoire                               | — | — | — | — | — | — | — | — | (7.73,  | (6.67,  | (-0.82, | <0.001 | (0.06, | (0.07, | (-0.72, | 0.001  |
|                                             |   |   |   |   |   |   |   |   | 9.59)   | 7.73)   | -0.37)  |        | 0.34)  | 0.22)  | -0.20)  |        |
|                                             |   |   |   |   |   |   |   |   | 12.87   | 15.74   | 0.60    |        | 0.23   | 0.28   | 0.58    |        |
| Croatia                                     | — | — | — | — | — | — | — | — | (11.32, | (13.73, | (0.25,  | 0.001  | (0.07, | (0.07, | (0.21,  | 0.002  |
|                                             |   |   |   |   |   |   |   |   | 14.59)  | 18.00)  | 0.96)   |        | 0.58)  | 0.79)  | 0.94)   |        |
|                                             |   |   |   |   |   |   |   |   | 8.02    | 5.94    | -1.11   |        | 0.14   | 0.10   | -1.06   |        |
| Cuba                                        | — | — | — | — | — | — | — | — | (7.21,  | (5.18,  | (-1.98, | 0.012  | (0.05, | (0.03, | (-1.58, | <0.001 |
|                                             |   |   |   |   |   |   |   |   | 8.90)   | 6.78)   | -0.24)  |        | 0.30)  | 0.28)  | -0.54)  |        |
|                                             |   |   |   |   |   |   |   |   | 11.36   | 8.73    | -0.80   |        | 0.20   | 0.15   | -0.74   |        |
| Cyprus                                      | — | — | — | — | — | — | — | — | (7.93,  | (6.42,  | (-1.56, | 0.042  | (0.00, | (0.00, | (-1.85, | 0.193  |
|                                             |   |   |   |   |   |   |   |   | 15.83)  | 11.82)  | -0.03)  |        | 1.68)  | 1.44)  | 0.38)   |        |
|                                             |   |   |   |   |   |   |   |   | 13.17   | 13.01   | -0.03   |        | 0.23   | 0.23   | -0.02   |        |
| Czechia                                     | — | — | — | — | — | — | — | — | (12.04, | (11.83, | (-0.60, | 0.919  | (0.10, | (0.10, | (-0.74, | 0.952  |
|                                             |   |   |   |   |   |   |   |   | 14.38)  | 14.30)  | 0.55)   |        | 0.45)  | 0.49)  | 0.70)   |        |
|                                             |   |   |   |   |   |   |   |   | 9.39    | 10.54   | 0.40    |        | 0.16   | 0.18   | 0.40    |        |
| Democratic<br>People's Republic<br>of Korea | — | — | — | — | — | — | — | — | (8.72,  | (9.92,  | (0.38,  | <0.001 | (0.09, | (0.11, | (0.40,  | <0.001 |
|                                             |   |   |   |   |   |   |   |   | 10.10)  | 11.18)  | 0.42)   |        | 0.28)  | 0.29)  | 0.40)   |        |
|                                             |   |   |   |   |   |   |   |   | 9.26    | 7.63    | -0.72   |        | 0.16   | 0.13   | -0.74   |        |
| Democratic<br>Republic of the<br>Congo      | — | — | — | — | — | — | — | — | (8.73,  | (7.32,  | (-0.88, | <0.001 | (0.10, | (0.10, | (-1.32, | 0.013  |
|                                             |   |   |   |   |   |   |   |   | 9.82)   | 7.94)   | -0.56)  |        | 0.25)  | 0.18)  | -0.16)  |        |
|                                             |   |   |   |   |   |   |   |   | 12.45   | 6.97    | -2.04   |        | 0.22   | 0.12   | -2.11   |        |
| Denmark                                     | — | — | — | — | — | — | — | — | (10.94, | (5.82,  | (-2.43, | <0.001 | (0.06, | (0.02, | (-2.78, | <0.001 |
|                                             |   |   |   |   |   |   |   |   | 14.12)  | 8.29)   | -1.65)  |        | 0.56)  | 0.44)  | -1.45)  |        |
|                                             |   |   |   |   |   |   |   |   | 12.51   | 9.28    | -1.06   |        | 0.22   | 0.16   | -1.14   |        |
| Djibouti                                    | — | — | — | — | — | — | — | — | (7.76,  | (6.83,  | (-1.79, | 0.005  | (0.00, | (0.00, | (-2.44, | 0.091  |
|                                             |   |   |   |   |   |   |   |   | 19.29)  | 12.34)  | -0.32)  |        | 3.01)  | 1.07)  | 0.18)   |        |



|                    |   |   |   |   |   |   |   |   |   |         |         |         |        |        |        |         |        |
|--------------------|---|---|---|---|---|---|---|---|---|---------|---------|---------|--------|--------|--------|---------|--------|
|                    |   |   |   |   |   |   |   |   |   | 10.26   | 9.02    | -0.42   |        | 0.18   | 0.16   | -0.52   |        |
| Dominica           | — | — | — | — | — | — | — | — | — | (1.82,  | (1.35,  | (-0.77, | 0.018  | (0.00, | (0.00, | (-1.06, | 0.056  |
|                    |   |   |   |   |   |   |   |   |   | 33.37)  | 30.27)  | -0.07)  |        | 16.86) | 14.98) | 0.01)   |        |
|                    |   |   |   |   |   |   |   |   |   | 6.54    | 8.33    | 0.88    |        | 0.11   | 0.15   | 1.19    |        |
| Dominican Republic | — | — | — | — | — | — | — | — | — | (5.60,  | (7.50,  | (0.40,  | <0.001 | (0.02, | (0.06, | (0.07,  | 0.037  |
|                    |   |   |   |   |   |   |   |   |   | 7.59)   | 9.23)   | 1.37)   |        | 0.35)  | 0.31)  | 2.31)   |        |
|                    |   |   |   |   |   |   |   |   |   | 9.44    | 9.73    | -0.02   |        | 0.16   | 0.17   | 0.01    |        |
| Ecuador            | — | — | — | — | — | — | — | — | — | (8.48,  | (9.01,  | (-0.71, | 0.952  | (0.06, | (0.09, | (-0.75, | 0.985  |
|                    |   |   |   |   |   |   |   |   |   | 10.49)  | 10.49)  | 0.67)   |        | 0.36)  | 0.30)  | 0.77)   |        |
|                    |   |   |   |   |   |   |   |   |   | 9.24    | 10.12   | 0.33    |        | 0.15   | 0.17   | 0.46    |        |
| Egypt              | — | — | — | — | — | — | — | — | — | (8.83,  | (9.82,  | (-0.09, | 0.125  | (0.11, | (0.13, | (0.25,  | <0.001 |
|                    |   |   |   |   |   |   |   |   |   | 9.66)   | 10.44)  | 0.76)   |        | 0.22)  | 0.21)  | 0.66)   |        |
|                    |   |   |   |   |   |   |   |   |   | 5.77    | 6.01    | 0.07    |        | 0.10   | 0.10   | 0.21    |        |
| El Salvador        | — | — | — | — | — | — | — | — | — | (4.72,  | (5.08,  | (-1.19, | 0.918  | (0.01, | (0.02, | (-0.51, | 0.574  |
|                    |   |   |   |   |   |   |   |   |   | 6.99)   | 7.07)   | 1.34)   |        | 0.41)  | 0.34)  | 0.93)   |        |
|                    |   |   |   |   |   |   |   |   |   | 9.97    | 8.07    | -0.73   |        | 0.17   | 0.14   | -0.70   |        |
| Equatorial Guinea  | — | — | — | — | — | — | — | — | — | (5.37,  | (5.86,  | (-1.15, | 0.001  | (0.00, | (0.00, | (-1.54, | 0.109  |
|                    |   |   |   |   |   |   |   |   |   | 17.09)  | 10.91)  | -0.30)  |        | 3.46)  | 1.09)  | 0.16)   |        |
|                    |   |   |   |   |   |   |   |   |   | 13.61   | 11.92   | -0.44   |        | 0.24   | 0.21   | -0.37   |        |
| Eritrea            | — | — | — | — | — | — | — | — | — | (11.41, | (10.62, | (-0.70, | 0.001  | (0.04, | (0.07, | (-0.66, | 0.010  |
|                    |   |   |   |   |   |   |   |   |   | 16.14)  | 13.34)  | -0.19)  |        | 0.83)  | 0.49)  | -0.09)  |        |
|                    |   |   |   |   |   |   |   |   |   | 12.59   | 10.07   | -0.76   |        | 0.22   | 0.17   | -0.76   |        |
| Estonia            | — | — | — | — | — | — | — | — | — | (9.88,  | (7.30,  | (-1.31, | 0.007  | (0.01, | (0.00, | (-1.31, | 0.007  |
|                    |   |   |   |   |   |   |   |   |   | 15.84)  | 13.71)  | -0.21)  |        | 1.10)  | 1.58)  | -0.21)  |        |
|                    |   |   |   |   |   |   |   |   |   | 10.51   | 11.84   | 0.39    |        | 0.18   | 0.21   | 0.48    |        |
| Eswatini           | — | — | — | — | — | — | — | — | — | (6.84,  | (8.94,  | (0.15,  | 0.001  | (0.00, | (0.00, | (0.39,  | <0.001 |
|                    |   |   |   |   |   |   |   |   |   | 15.57)  | 15.41)  | 0.63)   |        | 2.15)  | 1.25)  | 0.57)   |        |
|                    |   |   |   |   |   |   |   |   |   | 9.91    | 5.87    | -1.79   |        | 0.17   | 0.10   | -1.88   |        |
| Ethiopia           | — | — | — | — | — | — | — | — | — | (9.43,  | (5.63,  | (-1.91, | <0.001 | (0.11, | (0.07, | (-2.36, | <0.001 |
|                    |   |   |   |   |   |   |   |   |   | 10.41)  | 6.12)   | -1.67)  |        | 0.25)  | 0.14)  | -1.39)  |        |
|                    |   |   |   |   |   |   |   |   |   | 23.20   | 22.44   | -0.16   |        | 0.41   | 0.40   | -0.16   |        |
| Fiji               | — | — | — | — | — | — | — | — | — | (18.07, | (17.83, | (-0.54, | 0.426  | (0.02, | (0.03, | (-0.85, | 0.655  |
|                    |   |   |   |   |   |   |   |   |   | 29.39)  | 27.88)  | 0.23)   |        | 2.09)  | 1.77)  | 0.54)   |        |

|           |   |   |   |   |   |   |   |   |   |         |         |         |        |        |        |         |        |
|-----------|---|---|---|---|---|---|---|---|---|---------|---------|---------|--------|--------|--------|---------|--------|
|           |   |   |   |   |   |   |   |   |   | 18.68   | 9.41    | -2.38   |        | 0.33   | 0.17   | -2.34   |        |
| Finland   | — | — | — | — | — | — | — | — | — | (16.83, | (8.05,  | (-2.79, | <0.001 | (0.13, | (0.04, | (-2.85, | <0.001 |
|           |   |   |   |   |   |   |   |   |   | 20.71)  | 10.95)  | -1.96)  |        | 0.74)  | 0.53)  | -1.83)  |        |
|           |   |   |   |   |   |   |   |   |   | 9.03    | 5.33    | -1.85   |        | 0.16   | 0.09   | -1.96   |        |
| France    | — | — | — | — | — | — | — | — | — | (8.65,  | (5.02,  | (-2.24, | <0.001 | (0.11, | (0.06, | (-2.74, | <0.001 |
|           |   |   |   |   |   |   |   |   |   | 9.43)   | 5.65)   | -1.47)  |        | 0.22)  | 0.15)  | -1.18)  |        |
|           |   |   |   |   |   |   |   |   |   | 14.22   | 10.83   | -1.03   |        | 0.25   | 0.19   | -0.98   |        |
| Gabon     | — | — | — | — | — | — | — | — | — | (10.48, | (8.53,  | (-1.33, | <0.001 | (0.00, | (0.01, | (-1.85, | 0.028  |
|           |   |   |   |   |   |   |   |   |   | 18.92)  | 13.59)  | -0.74)  |        | 1.70)  | 0.92)  | -0.11)  |        |
|           |   |   |   |   |   |   |   |   |   | 6.51    | 7.17    | 0.31    |        | 0.12   | 0.13   | 0.27    |        |
| Gambia    | — | — | — | — | — | — | — | — | — | (3.98,  | (5.45,  | (-0.90, | 0.621  | (0.00, | (0.00, | (-0.20, | 0.258  |
|           |   |   |   |   |   |   |   |   |   | 10.13)  | 9.29)   | 1.53)   |        | 1.64)  | 0.75)  | 0.74)   |        |
|           |   |   |   |   |   |   |   |   |   | 3.62    | 13.33   | 4.64    |        | 0.06   | 0.24   | 4.94    |        |
| Georgia   | — | — | — | — | — | — | — | — | — | (2.86,  | (11.40, | (3.31,  | <0.001 | (0.00, | (0.05, | (3.52,  | <0.001 |
|           |   |   |   |   |   |   |   |   |   | 4.52)   | 15.53)  | 5.99)   |        | 0.30)  | 0.76)  | 6.39)   |        |
|           |   |   |   |   |   |   |   |   |   | 13.36   | 9.30    | -1.39   |        | 0.23   | 0.16   | -1.31   |        |
| Germany   | — | — | — | — | — | — | — | — | — | (12.95, | (8.95,  | (-1.89, | <0.001 | (0.18, | (0.12, | (-1.66, | <0.001 |
|           |   |   |   |   |   |   |   |   |   | 13.78)  | 9.67)   | -0.89)  |        | 0.29)  | 0.22)  | -0.95)  |        |
|           |   |   |   |   |   |   |   |   |   | 9.87    | 6.87    | -1.26   |        | 0.18   | 0.12   | -1.19   |        |
| Ghana     | — | — | — | — | — | — | — | — | — | (9.01,  | (6.42,  | (-1.56, | <0.001 | (0.08, | (0.07, | (-1.70, | <0.001 |
|           |   |   |   |   |   |   |   |   |   | 10.80)  | 7.35)   | -0.97)  |        | 0.35)  | 0.20)  | -0.67)  |        |
|           |   |   |   |   |   |   |   |   |   | 20.82   | 23.14   | 0.34    |        | 0.36   | 0.40   | 0.35    |        |
| Greece    | — | — | — | — | — | — | — | — | — | (19.39, | (21.48, | (-0.08, | 0.111  | (0.19, | (0.21, | (-0.01, | 0.056  |
|           |   |   |   |   |   |   |   |   |   | 22.32)  | 24.91)  | 0.75)   |        | 0.61)  | 0.71)  | 0.71)   |        |
|           |   |   |   |   |   |   |   |   |   | 7.68    | 4.07    | -2.21   |        | 0.14   | 0.07   | -2.53   |        |
| Greenland | — | — | — | — | — | — | — | — | — | (0.93,  | (0.06,  | (-2.50, | <0.001 | (0.00, | (0.00, | (-2.81, | <0.001 |
|           |   |   |   |   |   |   |   |   |   | 33.44)  | 29.30)  | -1.92)  |        | 22.28) | 22.66) | -2.25)  |        |
|           |   |   |   |   |   |   |   |   |   | 11.39   | 9.16    | -0.73   |        | 0.20   | 0.16   | -0.85   |        |
| Grenada   | — | — | — | — | — | — | — | — | — | (2.63,  | (2.19,  | (-1.50, | 0.063  | (0.00, | (0.00, | (-1.73, | 0.061  |
|           |   |   |   |   |   |   |   |   |   | 32.48)  | 25.61)  | 0.04)   |        | 14.44) | 11.08) | 0.04)   |        |
|           |   |   |   |   |   |   |   |   |   | 27.03   | 20.68   | -0.82   |        | 0.47   | 0.37   | -0.79   |        |
| Guam      | — | — | — | — | — | — | — | — | — | (15.66, | (10.64, | (-1.37, | 0.004  | (0.00, | (0.00, | (-1.42, | 0.015  |
|           |   |   |   |   |   |   |   |   |   | 43.69)  | 36.35)  | -0.26)  |        | 7.41)  | 7.41)  | -0.15)  |        |

|                               |   |   |   |   |   |   |   |   |         |         |         |        |        |        |         |        |
|-------------------------------|---|---|---|---|---|---|---|---|---------|---------|---------|--------|--------|--------|---------|--------|
|                               |   |   |   |   |   |   |   |   | 5.54    | 5.19    | -0.22   |        | 0.10   | 0.09   | -0.48   |        |
| Guatemala                     | — | — | — | — | — | — | — | — | (4.67,  | (4.68,  | (-1.14, | 0.636  | (0.02, | (0.03, | (-1.14, | 0.164  |
|                               |   |   |   |   |   |   |   |   | 6.52)   | 5.74)   | 0.71)   |        | 0.32)  | 0.19)  | 0.19)   |        |
|                               |   |   |   |   |   |   |   |   | 7.01    | 6.93    | -0.01   |        | 0.13   | 0.12   | -0.21   |        |
| Guinea                        | — | — | — | — | — | — | — | — | (5.87,  | (6.15,  | (-0.25, | 0.931  | (0.02, | (0.04, | (-0.44, | 0.080  |
|                               |   |   |   |   |   |   |   |   | 8.31)   | 7.79)   | 0.23)   |        | 0.42)  | 0.29)  | 0.03)   |        |
|                               |   |   |   |   |   |   |   |   | 9.48    | 8.89    | -0.21   |        | 0.17   | 0.16   | -0.21   |        |
| Guinea-Bissau                 | — | — | — | — | — | — | — | — | (6.38,  | (6.83,  | (-0.28, | <0.001 | (0.00, | (0.01, | (-0.58, | 0.268  |
|                               |   |   |   |   |   |   |   |   | 13.62)  | 11.40)  | -0.14)  |        | 1.65)  | 0.88)  | 0.16)   |        |
|                               |   |   |   |   |   |   |   |   | 9.35    | 16.08   | 2.35    |        | 0.16   | 0.28   | 2.37    |        |
| Guyana                        | — | — | — | — | — | — | — | — | (6.22,  | (11.82, | (1.84,  | <0.001 | (0.00, | (0.00, | (1.88,  | <0.001 |
|                               |   |   |   |   |   |   |   |   | 13.58)  | 21.41)  | 2.86)   |        | 1.72)  | 1.89)  | 2.86)   |        |
|                               |   |   |   |   |   |   |   |   | 7.44    | 7.43    | 0.07    |        | 0.13   | 0.13   | 0.17    |        |
| Haiti                         | — | — | — | — | — | — | — | — | (6.35,  | (6.71,  | (-0.10, | 0.425  | (0.03, | (0.05, | (-0.07, | 0.160  |
|                               |   |   |   |   |   |   |   |   | 8.67)   | 8.22)   | 0.23)   |        | 0.40)  | 0.28)  | 0.42)   |        |
|                               |   |   |   |   |   |   |   |   | 2.99    | 1.81    | -1.79   |        | 0.05   | 0.03   | -1.76   |        |
| Honduras                      | — | — | — | — | — | — | — | — | (2.17,  | (1.41,  | (-2.09, | <0.001 | (0.00, | (0.00, | (-2.40, | <0.001 |
|                               |   |   |   |   |   |   |   |   | 4.03)   | 2.30)   | -1.49)  |        | 0.38)  | 0.17)  | -1.10)  |        |
|                               |   |   |   |   |   |   |   |   | 15.04   | 10.80   | -1.14   |        | 0.27   | 0.19   | -1.21   |        |
| Hungary                       | — | — | — | — | — | — | — | — | (13.85, | (9.68,  | (-1.63, | <0.001 | (0.13, | (0.07, | (-1.96, | 0.002  |
|                               |   |   |   |   |   |   |   |   | 16.30)  | 12.03)  | -0.65)  |        | 0.49)  | 0.44)  | -0.45)  |        |
|                               |   |   |   |   |   |   |   |   | 14.67   | 9.12    | -1.61   |        | 0.25   | 0.16   | -1.54   |        |
| Iceland                       | — | — | — | — | — | — | — | — | (8.27,  | (4.62,  | (-1.84, | <0.001 | (0.00, | (0.00, | (-1.82, | <0.001 |
|                               |   |   |   |   |   |   |   |   | 24.19)  | 16.54)  | -1.39)  |        | 4.32)  | 4.04)  | -1.26)  |        |
|                               |   |   |   |   |   |   |   |   | 4.95    | 5.93    | 0.69    |        | 0.09   | 0.11   | 0.78    |        |
| India                         | — | — | — | — | — | — | — | — | (4.88,  | (5.87,  | (0.13,  | 0.016  | (0.08, | (0.10, | (-0.01, | 0.052  |
|                               |   |   |   |   |   |   |   |   | 5.03)   | 5.99)   | 1.25)   |        | 0.10)  | 0.11)  | 1.58)   |        |
|                               |   |   |   |   |   |   |   |   | 5.04    | 5.66    | 0.38    |        | 0.09   | 0.10   | 0.35    |        |
| Indonesia                     | — | — | — | — | — | — | — | — | (4.88,  | (5.52,  | (0.27,  | <0.001 | (0.07, | (0.08, | (0.35,  | <0.001 |
|                               |   |   |   |   |   |   |   |   | 5.21)   | 5.80)   | 0.50)   |        | 0.11)  | 0.12)  | 0.35)   |        |
|                               |   |   |   |   |   |   |   |   | 5.07    | 6.08    | 0.62    |        | 0.09   | 0.10   | 0.38    |        |
| Iran (Islamic<br>Republic of) | — | — | — | — | — | — | — | — | (4.76,  | (5.82,  | (0.40,  | <0.001 | (0.05, | (0.07, | (0.38,  | <0.001 |
|                               |   |   |   |   |   |   |   |   | 5.39)   | 6.35)   | 0.84)   |        | 0.14)  | 0.14)  | 0.38)   |        |

|            |   |   |   |   |   |   |   |   |         |         |         |        |        |        |         |        |
|------------|---|---|---|---|---|---|---|---|---------|---------|---------|--------|--------|--------|---------|--------|
|            |   |   |   |   |   |   |   |   | 5.87    | 4.34    | -1.02   |        | 0.10   | 0.07   | -1.15   |        |
| Iraq       | — | — | — | — | — | — | — | — | (5.27,  | (4.03,  | (-1.15, | <0.001 | (0.04, | (0.04, | (-2.02, | 0.009  |
|            |   |   |   |   |   |   |   |   | 6.52)   | 4.66)   | -0.89)  |        | 0.23)  | 0.13)  | -0.28)  |        |
|            |   |   |   |   |   |   |   |   | 11.86   | 8.33    | -1.25   |        | 0.20   | 0.14   | -1.24   |        |
| Ireland    | — | — | — | — | — | — | — | — | (10.08, | (7.01,  | (-1.70, | <0.001 | (0.04, | (0.02, | (-1.66, | <0.001 |
|            |   |   |   |   |   |   |   |   | 13.86)  | 9.85)   | -0.80)  |        | 0.63)  | 0.50)  | -0.82)  |        |
|            |   |   |   |   |   |   |   |   | 6.60    | 4.15    | -1.60   |        | 0.11   | 0.07   | -1.56   |        |
| Israel     | — | — | — | — | — | — | — | — | (5.50,  | (3.48,  | (-2.34, | <0.001 | (0.01, | (0.01, | (-1.95, | <0.001 |
|            |   |   |   |   |   |   |   |   | 7.87)   | 4.91)   | -0.85)  |        | 0.40)  | 0.24)  | -1.18)  |        |
|            |   |   |   |   |   |   |   |   | 9.49    | 7.36    | -0.91   |        | 0.16   | 0.13   | -0.80   |        |
| Italy      | — | — | — | — | — | — | — | — | (9.08,  | (6.96,  | (-1.33, | <0.001 | (0.11, | (0.08, | (-1.27, | 0.001  |
|            |   |   |   |   |   |   |   |   | 9.91)   | 7.78)   | -0.48)  |        | 0.23)  | 0.20)  | -0.32)  |        |
|            |   |   |   |   |   |   |   |   | 4.80    | 8.55    | 2.07    |        | 0.08   | 0.15   | 2.21    |        |
| Jamaica    | — | — | — | — | — | — | — | — | (3.45,  | (6.94,  | (0.61,  | 0.005  | (0.00, | (0.01, | (0.96,  | <0.001 |
|            |   |   |   |   |   |   |   |   | 6.53)   | 10.42)  | 3.55)   |        | 0.66)  | 0.60)  | 3.47)   |        |
|            |   |   |   |   |   |   |   |   | 5.81    | 9.96    | 1.88    |        | 0.10   | 0.18   | 2.08    |        |
| Japan      | — | — | — | — | — | — | — | — | (5.59,  | (9.64,  | (1.72,  | <0.001 | (0.07, | (0.14, | (1.77,  | <0.001 |
|            |   |   |   |   |   |   |   |   | 6.03)   | 10.29)  | 2.04)   |        | 0.14)  | 0.23)  | 2.40)   |        |
|            |   |   |   |   |   |   |   |   | 12.32   | 9.28    | -0.93   |        | 0.21   | 0.16   | -1.09   |        |
| Jordan     | — | — | — | — | — | — | — | — | (10.49, | (8.44,  | (-1.37, | <0.001 | (0.04, | (0.07, | (-1.97, | 0.017  |
|            |   |   |   |   |   |   |   |   | 14.43)  | 10.17)  | -0.49)  |        | 0.72)  | 0.32)  | -0.20)  |        |
|            |   |   |   |   |   |   |   |   | 11.52   | 16.37   | 1.16    |        | 0.20   | 0.29   | 1.17    |        |
| Kazakhstan | — | — | — | — | — | — | — | — | (10.73, | (15.46, | (0.58,  | <0.001 | (0.11, | (0.18, | (0.56,  | <0.001 |
|            |   |   |   |   |   |   |   |   | 12.36)  | 17.33)  | 1.74)   |        | 0.34)  | 0.45)  | 1.78)   |        |
|            |   |   |   |   |   |   |   |   | 8.73    | 8.68    | -0.02   |        | 0.15   | 0.15   | 0.05    |        |
| Kenya      | — | — | — | — | — | — | — | — | (8.05,  | (8.27,  | (-0.17, | 0.778  | (0.07, | (0.10, | (-0.56, | 0.878  |
|            |   |   |   |   |   |   |   |   | 9.45)   | 9.10)   | 0.12)   |        | 0.28)  | 0.22)  | 0.66)   |        |
|            |   |   |   |   |   |   |   |   | 10.81   | 11.84   | 0.31    |        | 0.19   | 0.21   | 0.41    |        |
| Kiribati   | — | — | — | — | — | — | — | — | (2.17,  | (4.11,  | (0.20,  | <0.001 | (0.00, | (0.00, | (0.41,  | <0.001 |
|            |   |   |   |   |   |   |   |   | 33.03)  | 26.86)  | 0.42)   |        | 15.74) | 8.83)  | 0.41)   |        |
|            |   |   |   |   |   |   |   |   | 6.30    | 5.69    | -0.35   |        | 0.10   | 0.09   | -0.36   |        |
| Kuwait     | — | — | — | — | — | — | — | — | (4.69,  | (4.61,  | (-1.35, | 0.492  | (0.00, | (0.01, | (-2.43, | 0.733  |
|            |   |   |   |   |   |   |   |   | 8.34)   | 6.98)   | 0.65)   |        | 0.78)  | 0.48)  | 1.75)   |        |

|              |   |   |   |   |   |   |   |   |   |         |         |         |        |        |        |         |        |
|--------------|---|---|---|---|---|---|---|---|---|---------|---------|---------|--------|--------|--------|---------|--------|
|              |   |   |   |   |   |   |   |   |   | 5.21    | 4.60    | -0.35   |        | 0.09   | 0.08   | -0.32   |        |
| Kyrgyzstan   | — | — | — | — | — | — | — | — | — | (4.18,  | (3.82,  | (-1.26, | 0.462  | (0.01, | (0.01, | (-1.85, | 0.682  |
|              |   |   |   |   |   |   |   |   |   | 6.43)   | 5.51)   | 0.58)   |        | 0.41)  | 0.30)  | 1.23)   |        |
| Lao People's |   |   |   |   |   |   |   |   |   | 4.07    | 6.34    | 1.56    |        | 0.07   | 0.11   | 1.56    |        |
| Democratic   | — | — | — | — | — | — | — | — | — | (3.08,  | (5.48,  | (1.38,  | <0.001 | (0.00, | (0.02, | (0.73,  | <0.001 |
| Republic     |   |   |   |   |   |   |   |   |   | 5.30)   | 7.31)   | 1.73)   |        | 0.44)  | 0.31)  | 2.39)   |        |
|              |   |   |   |   |   |   |   |   |   | 11.64   | 9.35    | -0.81   |        | 0.20   | 0.16   | -0.77   |        |
| Latvia       | — | — | — | — | — | — | — | — | — | (9.61,  | (7.10,  | (-1.99, | 0.182  | (0.02, | (0.00, | (-1.87, | 0.170  |
|              |   |   |   |   |   |   |   |   |   | 14.01)  | 12.22)  | 0.38)   |        | 0.77)  | 1.16)  | 0.33)   |        |
|              |   |   |   |   |   |   |   |   |   | 9.38    | 9.70    | 0.13    |        | 0.16   | 0.16   | 0.06    |        |
| Lebanon      | — | — | — | — | — | — | — | — | — | (7.66,  | (8.40,  | (0.01,  | 0.041  | (0.02, | (0.04, | (-0.16, | 0.604  |
|              |   |   |   |   |   |   |   |   |   | 11.37)  | 11.16)  | 0.25)   |        | 0.65)  | 0.49)  | 0.27)   |        |
|              |   |   |   |   |   |   |   |   |   | 7.78    | 9.84    | 0.82    |        | 0.14   | 0.17   | 0.83    |        |
| Lesotho      | — | — | — | — | — | — | — | — | — | (5.68,  | (7.91,  | (0.63,  | <0.001 | (0.00, | (0.01, | (0.35,  | 0.001  |
|              |   |   |   |   |   |   |   |   |   | 10.43)  | 12.11)  | 1.00)   |        | 0.98)  | 0.74)  | 1.31)   |        |
|              |   |   |   |   |   |   |   |   |   | 6.87    | 6.14    | -0.45   |        | 0.12   | 0.11   | -0.48   |        |
| Liberia      | — | — | — | — | — | — | — | — | — | (4.97,  | (5.05,  | (-0.78, | 0.007  | (0.00, | (0.01, | (-0.85, | 0.012  |
|              |   |   |   |   |   |   |   |   |   | 9.27)   | 7.40)   | -0.13)  |        | 0.86)  | 0.41)  | -0.10)  |        |
|              |   |   |   |   |   |   |   |   |   | 6.45    | 7.47    | 0.46    |        | 0.11   | 0.12   | 0.33    |        |
| Libya        | — | — | — | — | — | — | — | — | — | (5.22,  | (6.53,  | (-0.03, | 0.066  | (0.01, | (0.03, | (-0.47, | 0.419  |
|              |   |   |   |   |   |   |   |   |   | 7.90)   | 8.51)   | 0.96)   |        | 0.49)  | 0.34)  | 1.13)   |        |
|              |   |   |   |   |   |   |   |   |   | 12.02   | 14.16   | 0.52    |        | 0.21   | 0.25   | 0.54    |        |
| Lithuania    | — | — | — | — | — | — | — | — | — | (10.28, | (11.81, | (-0.98, | 0.501  | (0.04, | (0.04, | (-0.85, | 0.445  |
|              |   |   |   |   |   |   |   |   |   | 13.98)  | 16.90)  | 2.04)   |        | 0.63)  | 0.97)  | 1.95)   |        |
|              |   |   |   |   |   |   |   |   |   | 14.33   | 7.56    | -2.27   |        | 0.25   | 0.13   | -2.24   |        |
| Luxembourg   | — | — | — | — | — | — | — | — | — | (8.96,  | (4.43,  | (-2.88, | <0.001 | (0.00, | (0.00, | (-3.08, | <0.001 |
|              |   |   |   |   |   |   |   |   |   | 22.27)  | 12.41)  | -1.65)  |        | 4.03)  | 2.62)  | -1.39)  |        |
|              |   |   |   |   |   |   |   |   |   | 33.89   | 21.19   | -1.60   |        | 0.59   | 0.37   | -1.60   |        |
| Madagascar   | — | — | — | — | — | — | — | — | — | (32.10, | (20.28, | (-2.01, | <0.001 | (0.37, | (0.26, | (-2.07, | <0.001 |
|              |   |   |   |   |   |   |   |   |   | 35.77)  | 22.12)  | -1.20)  |        | 0.89)  | 0.51)  | -1.12)  |        |
|              |   |   |   |   |   |   |   |   |   | 10.61   | 10.11   | -0.17   |        | 0.18   | 0.17   | -0.18   |        |
| Malawi       | — | — | — | — | — | — | — | — | — | (9.49,  | (9.36,  | (-0.41, | 0.182  | (0.06, | (0.09, | (-0.37, | 0.077  |
|              |   |   |   |   |   |   |   |   |   | 11.83)  | 10.91)  | 0.08)   |        | 0.42)  | 0.31)  | 0.02)   |        |

|                   |   |   |   |   |   |   |   |   |         |         |         |        |        |        |         |        |
|-------------------|---|---|---|---|---|---|---|---|---------|---------|---------|--------|--------|--------|---------|--------|
|                   |   |   |   |   |   |   |   |   | 9.33    | 10.11   | 0.40    |        | 0.16   | 0.17   | 0.16    |        |
| Malaysia          | — | — | — | — | — | — | — | — | (8.63,  | (9.59,  | (-0.32, | 0.278  | (0.08, | (0.11, | (-0.96, | 0.777  |
|                   |   |   |   |   |   |   |   |   | 10.06)  | 10.66)  | 1.11)   |        | 0.28)  | 0.26)  | 1.30)   |        |
|                   |   |   |   |   |   |   |   |   | 6.78    | 4.98    | -1.00   |        | 0.12   | 0.09   | -0.81   |        |
| Maldives          | — | — | — | — | — | — | — | — | (2.00,  | (2.63,  | (-1.66, | 0.003  | (0.00, | (0.00, | (-1.69, | 0.075  |
|                   |   |   |   |   |   |   |   |   | 17.75)  | 9.20)   | -0.33)  |        | 7.73)  | 2.80)  | 0.08)   |        |
|                   |   |   |   |   |   |   |   |   | 7.80    | 6.15    | -0.78   |        | 0.14   | 0.11   | -0.76   |        |
| Mali              | — | — | — | — | — | — | — | — | (6.75,  | (5.56,  | (-0.98, | <0.001 | (0.03, | (0.04, | (-1.20, | 0.001  |
|                   |   |   |   |   |   |   |   |   | 8.97)   | 6.78)   | -0.59)  |        | 0.39)  | 0.23)  | -0.32)  |        |
|                   |   |   |   |   |   |   |   |   | 6.40    | 6.66    | 0.09    |        | 0.11   | 0.11   | -0.22   |        |
| Malta             | — | — | — | — | — | — | — | — | (2.93,  | (3.16,  | (-0.34, | 0.673  | (0.00, | (0.00, | (-0.77, | 0.448  |
|                   |   |   |   |   |   |   |   |   | 12.41)  | 13.07)  | 0.53)   |        | 3.37)  | 4.11)  | 0.34)   |        |
|                   |   |   |   |   |   |   |   |   | 20.64   | 24.97   | 0.69    |        | 0.36   | 0.44   | 0.71    |        |
| Marshall Islands  | — | — | — | — | — | — | — | — | (4.42,  | (9.08,  | (0.63,  | <0.001 | (0.00, | (0.00, | (0.54,  | <0.001 |
|                   |   |   |   |   |   |   |   |   | 61.01)  | 54.94)  | 0.74)   |        | 28.00) | 17.03) | 0.88)   |        |
|                   |   |   |   |   |   |   |   |   | 7.82    | 5.01    | -1.49   |        | 0.14   | 0.09   | -1.50   |        |
| Mauritania        | — | — | — | — | — | — | — | — | (5.84,  | (3.89,  | (-1.60, | <0.001 | (0.00, | (0.00, | (-1.66, | <0.001 |
|                   |   |   |   |   |   |   |   |   | 10.27)  | 6.35)   | -1.37)  |        | 0.87)  | 0.46)  | -1.34)  |        |
|                   |   |   |   |   |   |   |   |   | 8.92    | 9.10    | 0.00    |        | 0.16   | 0.16   | -0.02   |        |
| Mauritius         | — | — | — | — | — | — | — | — | (6.47,  | (6.60,  | (-0.88, | 0.999  | (0.00, | (0.00, | (-1.13, | 0.975  |
|                   |   |   |   |   |   |   |   |   | 12.02)  | 12.27)  | 0.89)   |        | 1.09)  | 1.15)  | 1.10)   |        |
|                   |   |   |   |   |   |   |   |   | 4.89    | 4.92    | 0.09    |        | 0.08   | 0.08   | 0.15    |        |
| Mexico            | — | — | — | — | — | — | — | — | (4.64,  | (4.73,  | (-0.50, | 0.770  | (0.05, | (0.06, | (-1.47, | 0.860  |
|                   |   |   |   |   |   |   |   |   | 5.14)   | 5.12)   | 0.68)   |        | 0.12)  | 0.11)  | 1.79)   |        |
| Micronesia        |   |   |   |   |   |   |   |   | 26.47   | 26.12   | -0.06   |        | 0.47   | 0.46   | -0.14   |        |
| (Federated States | — | — | — | — | — | — | — | — | (12.24, | (12.44, | (-0.12, | 0.036  | (0.00, | (0.00, | (-0.26, | 0.020  |
| of)               |   |   |   |   |   |   |   |   | 50.34)  | 48.64)  | -0.00)  |        | 12.50) | 11.51) | -0.02)  |        |
|                   |   |   |   |   |   |   |   |   | 17.50   | 14.50   | -0.64   |        | 0.30   | 0.25   | -0.58   |        |
| Monaco            | — | — | — | — | — | — | — | — | (1.64,  | (0.92,  | (-0.71, | <0.001 | (0.00, | (0.00, | (-0.71, | <0.001 |
|                   |   |   |   |   |   |   |   |   | 86.90)  | 69.08)  | -0.56)  |        | 61.84) | 44.78) | -0.44)  |        |
|                   |   |   |   |   |   |   |   |   | 3.95    | 5.12    | 0.91    |        | 0.07   | 0.09   | 1.10    |        |
| Mongolia          | — | — | — | — | — | — | — | — | (2.66,  | (4.00,  | (0.39,  | 0.001  | (0.00, | (0.00, | (0.77,  | <0.001 |
|                   |   |   |   |   |   |   |   |   | 5.69)   | 6.48)   | 1.44)   |        | 0.76)  | 0.51)  | 1.44)   |        |

|             |   |   |   |   |   |   |   |   |   |         |         |         |        |         |        |         |        |
|-------------|---|---|---|---|---|---|---|---|---|---------|---------|---------|--------|---------|--------|---------|--------|
|             |   |   |   |   |   |   |   |   |   | 70.00   | 47.23   | -1.87   |        | 1.22    | 0.83   | -1.84   |        |
| Montenegro  | — | — | — | — | — | — | — | — | — | (60.09, | (38.63, | (-3.73, | 0.054  | (0.26,  | (0.09, | (-3.63, | 0.049  |
|             |   |   |   |   |   |   |   |   |   | 81.11)  | 57.28)  | 0.03)   |        | 3.56)   | 3.35)  | -0.01)  |        |
|             |   |   |   |   |   |   |   |   |   | 4.70    | 4.20    | -0.34   |        | 0.08    | 0.07   | -0.54   |        |
| Morocco     | — | — | — | — | — | — | — | — | — | (4.27,  | (3.87,  | (-0.69, | 0.051  | (0.03,  | (0.03, | (-1.16, | 0.091  |
|             |   |   |   |   |   |   |   |   |   | 5.15)   | 4.54)   | 0.00)   |        | 0.17)   | 0.13)  | 0.09)   |        |
|             |   |   |   |   |   |   |   |   |   | 8.17    | 11.73   | 1.31    |        | 0.14    | 0.20   | 1.28    |        |
| Mozambique  | — | — | — | — | — | — | — | — | — | (7.31,  | (11.04, | (1.12,  | <0.001 | (0.05,  | (0.12, | (0.86,  | <0.001 |
|             |   |   |   |   |   |   |   |   |   | 9.10)   | 12.45)  | 1.49)   |        | 0.32)   | 0.32)  | 1.71)   |        |
|             |   |   |   |   |   |   |   |   |   | 6.86    | 7.30    | 0.24    |        | 0.12    | 0.12   | 0.00    |        |
| Myanmar     | — | — | — | — | — | — | — | — | — | (6.46,  | (6.95,  | (0.11,  | <0.001 | (0.07,  | (0.08, | (0.00,  | <0.001 |
|             |   |   |   |   |   |   |   |   |   | 7.28)   | 7.67)   | 0.37)   |        | 0.19)   | 0.18)  | 0.00)*  |        |
|             |   |   |   |   |   |   |   |   |   | 9.99    | 8.94    | -0.33   |        | 0.17    | 0.15   | -0.39   |        |
| Namibia     | — | — | — | — | — | — | — | — | — | (7.32,  | (7.15,  | (-0.58, | 0.013  | (0.00,  | (0.01, | (-1.02, | 0.222  |
|             |   |   |   |   |   |   |   |   |   | 13.38)  | 11.05)  | -0.07)  |        | 1.27)   | 0.70)  | 0.24)   |        |
|             |   |   |   |   |   |   |   |   |   | 33.62   | 33.39   | -0.02   |        | 0.60    | 0.59   | -0.05   |        |
| Nauru       | — | — | — | — | — | — | — | — | — | (1.68,  | (2.14,  | (-0.06, | 0.235  | (0.00,  | (0.00, | (-0.13, | 0.164  |
|             |   |   |   |   |   |   |   |   |   | 163.92) | 152.31) | 0.02)   |        | 104.87) | 94.32) | 0.02)   |        |
|             |   |   |   |   |   |   |   |   |   | 3.28    | 3.66    | 0.38    |        | 0.06    | 0.06   | 0.02    |        |
| Nepal       | — | — | — | — | — | — | — | — | — | (2.85,  | (3.33,  | (0.19,  | <0.001 | (0.01,  | (0.03, | (-0.12, | 0.809  |
|             |   |   |   |   |   |   |   |   |   | 3.75)   | 4.02)   | 0.56)   |        | 0.16)   | 0.13)  | 0.15)   |        |
|             |   |   |   |   |   |   |   |   |   | 8.36    | 4.83    | -1.93   |        | 0.14    | 0.08   | -2.02   |        |
| Netherlands | — | — | — | — | — | — | — | — | — | (7.65,  | (4.26,  | (-2.09, | <0.001 | (0.07,  | (0.03, | (-2.58, | <0.001 |
|             |   |   |   |   |   |   |   |   |   | 9.12)   | 5.46)   | -1.78)  |        | 0.28)   | 0.21)  | -1.45)  |        |
|             |   |   |   |   |   |   |   |   |   | 13.49   | 7.04    | -2.28   |        | 0.24    | 0.13   | -2.17   |        |
| New Zealand | — | — | — | — | — | — | — | — | — | (11.63, | (5.74,  | (-2.50, | <0.001 | (0.05,  | (0.01, | (-2.53, | <0.001 |
|             |   |   |   |   |   |   |   |   |   | 15.57)  | 8.56)   | -2.06)  |        | 0.67)   | 0.49)  | -1.82)  |        |
|             |   |   |   |   |   |   |   |   |   | 3.96    | 3.53    | -0.53   |        | 0.07    | 0.06   | -0.68   |        |
| Nicaragua   | — | — | — | — | — | — | — | — | — | (2.93,  | (2.86,  | (-0.95, | 0.012  | (0.00,  | (0.01, | (-1.44, | 0.084  |
|             |   |   |   |   |   |   |   |   |   | 5.26)   | 4.31)   | -0.12)  |        | 0.48)   | 0.25)  | 0.09)   |        |
|             |   |   |   |   |   |   |   |   |   | 6.12    | 5.01    | -0.68   |        | 0.11    | 0.09   | -0.66   |        |
| Niger       | — | — | — | — | — | — | — | — | — | (5.14,  | (4.47,  | (-0.92, | <0.001 | (0.02,  | (0.03, | (-0.94, | <0.001 |
|             |   |   |   |   |   |   |   |   |   | 7.25)   | 5.59)   | -0.45)  |        | 0.37)   | 0.20)  | -0.38)  |        |

|                          |   |   |   |   |   |   |   |   |         |         |         |        |         |         |         |        |
|--------------------------|---|---|---|---|---|---|---|---|---------|---------|---------|--------|---------|---------|---------|--------|
|                          |   |   |   |   |   |   |   |   | 8.11    | 5.85    | -1.12   |        | 0.15    | 0.10    | -1.48   |        |
| Nigeria                  | — | — | — | — | — | — | — | — | (7.78,  | (5.67,  | (-1.31, | <0.001 | (0.10,  | (0.08,  | (-2.07, | <0.001 |
|                          |   |   |   |   |   |   |   |   | 8.45)   | 6.03)   | -0.94)  |        | 0.20)   | 0.13)   | -0.88)  |        |
|                          |   |   |   |   |   |   |   |   | 22.96   | 16.80   | -1.09   |        | 0.41    | 0.29    | -1.17   |        |
| Niue                     | — | — | — | — | — | — | — | — | (0.00,  | (0.00,  | (-1.30, | <0.001 | (0.00,  | (0.00,  | (-1.48, | <0.001 |
|                          |   |   |   |   |   |   |   |   | 563.81) | 765.11) | -0.89)  |        | 518.58) | 732.70) | -0.86)  |        |
|                          |   |   |   |   |   |   |   |   | 7.59    | 9.91    | 0.94    |        | 0.13    | 0.18    | 1.09    |        |
| North Macedonia          | — | — | — | — | — | — | — | — | (5.82,  | (7.91,  | (0.14,  | 0.021  | (0.00,  | (0.01,  | (0.22,  | 0.014  |
|                          |   |   |   |   |   |   |   |   | 9.73)   | 12.35)  | 1.75)   |        | 0.71)   | 0.93)   | 1.98)   |        |
|                          |   |   |   |   |   |   |   |   | 25.37   | 8.75    | -3.58   |        | 0.46    | 0.16    | -3.57   |        |
| Northern Mariana Islands | — | — | — | — | — | — | — | — | (9.59,  | (0.14,  | (-3.96, | <0.001 | (0.00,  | (0.00,  | (-4.13, | <0.001 |
|                          |   |   |   |   |   |   |   |   | 56.97)  | 58.85)  | -3.20)  |        | 20.70)  | 43.79)  | -3.00)  |        |
|                          |   |   |   |   |   |   |   |   | 11.97   | 5.53    | -2.64   |        | 0.21    | 0.10    | -2.52   |        |
| Norway                   | — | — | — | — | — | — | — | — | (10.36, | (4.52,  | (-3.13, | <0.001 | (0.05,  | (0.01,  | (-3.32, | <0.001 |
|                          |   |   |   |   |   |   |   |   | 13.77)  | 6.72)   | -2.15)  |        | 0.60)   | 0.41)   | -1.71)  |        |
|                          |   |   |   |   |   |   |   |   | 9.27    | 9.63    | 0.20    |        | 0.16    | 0.16    | 0.05    |        |
| Oman                     | — | — | — | — | — | — | — | — | (7.28,  | (8.39,  | (-0.27, | 0.406  | (0.01,  | (0.04,  | (-0.65, | 0.881  |
|                          |   |   |   |   |   |   |   |   | 11.64)  | 11.05)  | 0.67)   |        | 0.78)   | 0.53)   | 0.77)   |        |
|                          |   |   |   |   |   |   |   |   | 5.05    | 8.87    | 1.96    |        | 0.09    | 0.16    | 1.85    |        |
| Pakistan                 | — | — | — | — | — | — | — | — | (4.81,  | (8.66,  | (1.73,  | <0.001 | (0.06,  | (0.13,  | (1.58,  | <0.001 |
|                          |   |   |   |   |   |   |   |   | 5.29)   | 9.07)   | 2.18)   |        | 0.13)   | 0.19)   | 2.12)   |        |
|                          |   |   |   |   |   |   |   |   | 20.52   | 23.55   | 0.40    |        | 0.36    | 0.41    | 0.29    |        |
| Palau                    | — | — | — | — | — | — | — | — | (1.23,  | (1.77,  | (0.01,  | 0.045  | (0.00,  | (0.00,  | (-0.02, | 0.064  |
|                          |   |   |   |   |   |   |   |   | 95.37)  | 108.20) | 0.79)   |        | 59.61)  | 69.59)  | 0.59)   |        |
|                          |   |   |   |   |   |   |   |   | 5.27    | 5.25    | 0.04    |        | 0.09    | 0.09    | 0.01    |        |
| Palestine                | — | — | — | — | — | — | — | — | (3.63,  | (4.27,  | (-0.41, | 0.878  | (0.00,  | (0.01,  | (-1.09, | 0.985  |
|                          |   |   |   |   |   |   |   |   | 7.45)   | 6.41)   | 0.48)   |        | 0.93)   | 0.39)   | 1.12)   |        |
|                          |   |   |   |   |   |   |   |   | 11.30   | 10.66   | -0.10   |        | 0.20    | 0.19    | -0.11   |        |
| Panama                   | — | — | — | — | — | — | — | — | (9.22,  | (9.11,  | (-0.61, | 0.694  | (0.02,  | (0.04,  | (-1.03, | 0.813  |
|                          |   |   |   |   |   |   |   |   | 13.73)  | 12.40)  | 0.41)   |        | 0.80)   | 0.56)   | 0.82)   |        |
|                          |   |   |   |   |   |   |   |   | 10.05   | 10.53   | 0.17    |        | 0.18    | 0.19    | 0.23    |        |
| Papua New Guinea         | — | — | — | — | — | — | — | — | (8.47,  | (9.52,  | (0.03,  | 0.015  | (0.03,  | (0.08,  | (0.23,  | <0.001 |
|                          |   |   |   |   |   |   |   |   | 11.86)  | 11.61)  | 0.31)   |        | 0.59)   | 0.39)   | 0.23)   |        |



|                     |   |   |   |   |   |   |   |   |   |         |         |         |        |        |        |         |        |
|---------------------|---|---|---|---|---|---|---|---|---|---------|---------|---------|--------|--------|--------|---------|--------|
|                     |   |   |   |   |   |   |   |   |   | 7.15    | 8.74    | 0.79    |        | 0.12   | 0.15   | 0.81    |        |
| Paraguay            | — | — | — | — | — | — | — | — | — | (5.83,  | (7.70,  | (0.23,  | 0.006  | (0.01, | (0.04, | (-0.23, | 0.127  |
|                     |   |   |   |   |   |   |   |   |   | 8.68)   | 9.88)   | 1.37)   |        | 0.50)  | 0.38)  | 1.86)   |        |
|                     |   |   |   |   |   |   |   |   |   | 7.42    | 6.19    | -0.48   |        | 0.13   | 0.11   | -0.56   |        |
| Peru                | — | — | — | — | — | — | — | — | — | (6.84,  | (5.78,  | (-1.08, | 0.122  | (0.06, | (0.06, | (-1.52, | 0.259  |
|                     |   |   |   |   |   |   |   |   |   | 8.04)   | 6.63)   | 0.13)   |        | 0.24)  | 0.18)  | 0.41)   |        |
|                     |   |   |   |   |   |   |   |   |   | 2.60    | 10.37   | 4.93    |        | 0.05   | 0.18   | 4.87    |        |
| Philippines         | — | — | — | — | — | — | — | — | — | (2.40,  | (10.08, | (4.35,  | <0.001 | (0.02, | (0.14, | (3.90,  | <0.001 |
|                     |   |   |   |   |   |   |   |   |   | 2.82)   | 10.68)  | 5.52)   |        | 0.08)  | 0.22)  | 5.85)   |        |
|                     |   |   |   |   |   |   |   |   |   | 12.44   | 14.83   | 0.55    |        | 0.22   | 0.26   | 0.57    |        |
| Poland              | — | — | — | — | — | — | — | — | — | (11.89, | (14.20, | (0.26,  | <0.001 | (0.15, | (0.18, | (0.27,  | <0.001 |
|                     |   |   |   |   |   |   |   |   |   | 13.01)  | 15.49)  | 0.84)   |        | 0.31)  | 0.37)  | 0.88)   |        |
|                     |   |   |   |   |   |   |   |   |   | 12.52   | 8.72    | -1.25   |        | 0.21   | 0.15   | -1.14   |        |
| Portugal            | — | — | — | — | — | — | — | — | — | (11.41, | (7.73,  | (-2.13, | 0.005  | (0.09, | (0.05, | (-2.17, | 0.033  |
|                     |   |   |   |   |   |   |   |   |   | 13.70)  | 9.81)   | -0.37)  |        | 0.42)  | 0.37)  | -0.09)  |        |
|                     |   |   |   |   |   |   |   |   |   | 6.93    | 4.54    | -1.32   |        | 0.12   | 0.08   | -1.22   |        |
| Puerto Rico         | — | — | — | — | — | — | — | — | — | (5.60,  | (3.40,  | (-1.87, | <0.001 | (0.01, | (0.00, | (-2.10, | 0.007  |
|                     |   |   |   |   |   |   |   |   |   | 8.47)   | 5.95)   | -0.76)  |        | 0.49)  | 0.49)  | -0.34)  |        |
|                     |   |   |   |   |   |   |   |   |   | 5.68    | 4.06    | -1.15   |        | 0.10   | 0.07   | -1.14   |        |
| Qatar               | — | — | — | — | — | — | — | — | — | (3.07,  | (3.12,  | (-1.63, | <0.001 | (0.00, | (0.00, | (-2.05, | 0.015  |
|                     |   |   |   |   |   |   |   |   |   | 10.25)  | 5.41)   | -0.67)  |        | 3.00)  | 0.83)  | -0.23)  |        |
|                     |   |   |   |   |   |   |   |   |   | 6.59    | 4.53    | -1.30   |        | 0.12   | 0.08   | -1.46   |        |
| Republic of Korea   | — | — | — | — | — | — | — | — | — | (6.24,  | (4.23,  | (-1.85, | <0.001 | (0.07, | (0.05, | (-1.63, | <0.001 |
|                     |   |   |   |   |   |   |   |   |   | 6.95)   | 4.84)   | -0.75)  |        | 0.17)  | 0.14)  | -1.28)  |        |
|                     |   |   |   |   |   |   |   |   |   | 9.19    | 13.17   | 1.18    |        | 0.16   | 0.23   | 1.22    |        |
| Republic of Moldova | — | — | — | — | — | — | — | — | — | (7.83,  | (11.33, | (0.29,  | 0.009  | (0.03, | (0.05, | (0.14,  | 0.027  |
|                     |   |   |   |   |   |   |   |   |   | 10.73)  | 15.28)  | 2.08)   |        | 0.50)  | 0.74)  | 2.31)   |        |
|                     |   |   |   |   |   |   |   |   |   | 14.04   | 17.95   | 0.90    |        | 0.24   | 0.31   | 0.88    |        |
| Romania             | — | — | — | — | — | — | — | — | — | (13.26, | (16.88, | (0.30,  | 0.003  | (0.15, | (0.18, | (0.37,  | 0.001  |
|                     |   |   |   |   |   |   |   |   |   | 14.86)  | 19.08)  | 1.49)   |        | 0.38)  | 0.49)  | 1.40)   |        |
|                     |   |   |   |   |   |   |   |   |   | 14.48   | 22.14   | 1.53    |        | 0.25   | 0.39   | 1.60    |        |
| Russian Federation  | — | — | — | — | — | — | — | — | — | (14.18, | (21.74, | (0.22,  | 0.022  | (0.21, | (0.34, | (0.23,  | 0.022  |
|                     |   |   |   |   |   |   |   |   |   | 14.79)  | 22.54)  | 2.86)   |        | 0.30)  | 0.45)  | 2.98)   |        |

|                                  |   |   |   |   |   |   |   |   |         |         |         |        |        |        |         |        |
|----------------------------------|---|---|---|---|---|---|---|---|---------|---------|---------|--------|--------|--------|---------|--------|
|                                  |   |   |   |   |   |   |   |   | 17.44   | 9.64    | -2.03   |        | 0.30   | 0.17   | -1.95   |        |
| Rwanda                           | — | — | — | — | — | — | — | — | (15.82, | (8.80,  | (-2.21, | <0.001 | (0.12, | (0.07, | (-2.31, | <0.001 |
|                                  |   |   |   |   |   |   |   |   | 19.19)  | 10.54)  | -1.84)  |        | 0.63)  | 0.33)  | -1.58)  |        |
| Saint Kitts and Nevis            | — | — | — | — | — | — | — | — | 8.06    | 4.21    | -1.46   |        | 0.14   | 0.07   | -1.59   |        |
|                                  |   |   |   |   |   |   |   |   | (0.40,  | (0.10,  | (-2.37, | 0.002  | (0.00, | (0.00, | (-2.68, | 0.004  |
|                                  |   |   |   |   |   |   |   |   | 39.97)  | 25.60)  | -0.55)  |        | 25.99) | 18.35) | -0.50)  |        |
| Saint Lucia                      | — | — | — | — | — | — | — | — | 13.64   | 12.00   | -0.48   |        | 0.24   | 0.21   | -0.50   |        |
|                                  |   |   |   |   |   |   |   |   | (5.15,  | (5.29,  | (-0.92, | 0.033  | (0.00, | (0.00, | (-1.13, | 0.126  |
|                                  |   |   |   |   |   |   |   |   | 29.91)  | 23.65)  | -0.04)  |        | 9.83)  | 6.40)  | 0.14)   |        |
| Saint Vincent and the Grenadines | — | — | — | — | — | — | — | — | 8.22    | 7.60    | -0.24   |        | 0.14   | 0.13   | -0.21   |        |
|                                  |   |   |   |   |   |   |   |   | (1.77,  | (1.68,  | (-1.32, | 0.662  | (0.00, | (0.00, | (-0.86, | 0.527  |
|                                  |   |   |   |   |   |   |   |   | 24.86)  | 21.79)  | 0.85)   |        | 12.07) | 9.46)  | 0.44)   |        |
| Samoa                            | — | — | — | — | — | — | — | — | 15.15   | 14.88   | -0.08   |        | 0.27   | 0.26   | -0.14   |        |
|                                  |   |   |   |   |   |   |   |   | (6.45,  | (7.34,  | (-0.14, | 0.014  | (0.00, | (0.00, | (-0.28, | 0.042  |
|                                  |   |   |   |   |   |   |   |   | 30.76)  | 27.09)  | -0.02)  |        | 8.96)  | 6.18)  | -0.01)  |        |
| San Marino                       | — | — | — | — | — | — | — | — | 6.80    | 6.37    | -0.24   |        | 0.12   | 0.11   | -0.33   |        |
|                                  |   |   |   |   |   |   |   |   | (0.02,  | (0.04,  | (-0.34, | <0.001 | (0.00, | (0.00, | (-0.97, | 0.322  |
|                                  |   |   |   |   |   |   |   |   | 56.68)  | 50.83)  | -0.13)  |        | 44.03) | 39.54) | 0.32)   |        |
| Sao Tome and Principe            | — | — | — | — | — | — | — | — | 7.23    | 7.56    | 0.40    |        | 0.13   | 0.13   | 0.08    |        |
|                                  |   |   |   |   |   |   |   |   | (1.02,  | (2.79,  | (-0.23, | 0.212  | (0.00, | (0.00, | (-0.94, | 0.881  |
|                                  |   |   |   |   |   |   |   |   | 25.77)  | 16.56)  | 1.03)   |        | 13.96) | 5.21)  | 1.10)   |        |
| Saudi Arabia                     | — | — | — | — | — | — | — | — | 3.46    | 4.19    | 0.63    |        | 0.06   | 0.07   | 0.69    |        |
|                                  |   |   |   |   |   |   |   |   | (3.01,  | (3.91,  | (0.43,  | <0.001 | (0.02, | (0.04, | (0.26,  | 0.002  |
|                                  |   |   |   |   |   |   |   |   | 3.96)   | 4.48)   | 0.83)   |        | 0.17)  | 0.13)  | 1.13)   |        |
| Senegal                          | — | — | — | — | — | — | — | — | 6.34    | 6.02    | -0.29   |        | 0.11   | 0.11   | 0.18    |        |
|                                  |   |   |   |   |   |   |   |   | (5.34,  | (5.37,  | (-0.73, | 0.199  | (0.02, | (0.04, | (-0.23, | 0.394  |
|                                  |   |   |   |   |   |   |   |   | 7.49)   | 6.72)   | 0.15)   |        | 0.38)  | 0.24)  | 0.58)   |        |
| Serbia                           | — | — | — | — | — | — | — | — | 16.38   | 13.24   | -0.72   |        | 0.29   | 0.24   | -0.65   |        |
|                                  |   |   |   |   |   |   |   |   | (15.09, | (11.98, | (-1.12, | 0.001  | (0.14, | (0.10, | (-1.27, | 0.038  |
|                                  |   |   |   |   |   |   |   |   | 17.75)  | 14.60)  | -0.31)  |        | 0.53)  | 0.50)  | -0.04)  |        |
| Seychelles                       | — | — | — | — | — | — | — | — | 10.43   | 12.39   | 0.82    |        | 0.18   | 0.21   | 0.66    |        |
|                                  |   |   |   |   |   |   |   |   | (2.08,  | (4.01,  | (-0.00, | 0.051  | (0.00, | (0.00, | (-0.35, | 0.202  |
|                                  |   |   |   |   |   |   |   |   | 32.79)  | 30.35)  | 1.64)   |        | 16.50) | 12.00) | 1.69)   |        |

|                 |   |   |   |   |   |   |   |   |         |         |         |        |        |        |         |        |
|-----------------|---|---|---|---|---|---|---|---|---------|---------|---------|--------|--------|--------|---------|--------|
|                 |   |   |   |   |   |   |   |   | 6.36    | 6.46    | 0.08    |        | 0.11   | 0.11   | -0.08   |        |
| Sierra Leone    | — | — | — | — | — | — | — | — | (5.02,  | (5.59,  | (-0.21, | 0.609  | (0.01, | (0.03, | (-0.90, | 0.849  |
|                 |   |   |   |   |   |   |   |   | 7.96)   | 7.44)   | 0.36)   |        | 0.54)  | 0.33)  | 0.75)   |        |
|                 |   |   |   |   |   |   |   |   | 12.71   | 5.89    | -2.74   |        | 0.22   | 0.10   | -2.73   |        |
| Singapore       | — | — | — | — | — | — | — | — | (10.98, | (4.91,  | (-3.43, | <0.001 | (0.05, | (0.01, | (-3.50, | <0.001 |
|                 |   |   |   |   |   |   |   |   | 14.64)  | 7.06)   | -2.05)  |        | 0.64)  | 0.46)  | -1.95)  |        |
|                 |   |   |   |   |   |   |   |   | 15.07   | 14.32   | -0.29   |        | 0.27   | 0.25   | -0.38   |        |
| Slovakia        | — | — | — | — | — | — | — | — | (13.48, | (12.70, | (-0.98, | 0.402  | (0.10, | (0.08, | (-1.13, | 0.328  |
|                 |   |   |   |   |   |   |   |   | 16.81)  | 16.12)  | 0.40)   |        | 0.61)  | 0.66)  | 0.38)   |        |
|                 |   |   |   |   |   |   |   |   | 11.84   | 9.05    | -0.94   |        | 0.21   | 0.16   | -1.01   |        |
| Slovenia        | — | — | — | — | — | — | — | — | (9.61,  | (6.94,  | (-1.59, | 0.005  | (0.02, | (0.01, | (-1.78, | 0.011  |
|                 |   |   |   |   |   |   |   |   | 14.47)  | 11.72)  | -0.29)  |        | 0.91)  | 1.11)  | -0.23)  |        |
|                 |   |   |   |   |   |   |   |   | 17.73   | 18.24   | 0.10    |        | 0.32   | 0.33   | 0.11    |        |
| Solomon Islands | — | — | — | — | — | — | — | — | (10.41, | (13.21, | (0.03,  | 0.009  | (0.00, | (0.00, | (-0.26, | 0.578  |
|                 |   |   |   |   |   |   |   |   | 28.44)  | 24.58)  | 0.18)   |        | 4.87)  | 2.24)  | 0.48)   |        |
|                 |   |   |   |   |   |   |   |   | 11.91   | 8.02    | -1.33   |        | 0.21   | 0.14   | -1.30   |        |
| Somalia         | — | — | — | — | — | — | — | — | (10.55, | (7.36,  | (-1.61, | <0.001 | (0.07, | (0.06, | (-1.62, | <0.001 |
|                 |   |   |   |   |   |   |   |   | 13.41)  | 8.73)   | -1.05)  |        | 0.50)  | 0.27)  | -0.99)  |        |
|                 |   |   |   |   |   |   |   |   | 23.47   | 11.29   | -2.65   |        | 0.41   | 0.20   | -2.43   |        |
| South Africa    | — | — | — | — | — | — | — | — | (22.68, | (10.88, | (-3.56, | <0.001 | (0.31, | (0.15, | (-3.44, | <0.001 |
|                 |   |   |   |   |   |   |   |   | 24.28)  | 11.72)  | -1.73)  |        | 0.54)  | 0.26)  | -1.41)  |        |
|                 |   |   |   |   |   |   |   |   | 10.43   | 6.37    | -1.71   |        | 0.18   | 0.11   | -1.62   |        |
| South Sudan     | — | — | — | — | — | — | — | — | (9.02,  | (5.48,  | (-2.01, | <0.001 | (0.04, | (0.02, | (-2.08, | <0.001 |
|                 |   |   |   |   |   |   |   |   | 12.02)  | 7.37)   | -1.41)  |        | 0.53)  | 0.33)  | -1.17)  |        |
|                 |   |   |   |   |   |   |   |   | 10.50   | 7.46    | -1.33   |        | 0.18   | 0.13   | -1.22   |        |
| Spain           | — | — | — | — | — | — | — | — | (9.98,  | (7.02,  | (-1.71, | <0.001 | (0.12, | (0.08, | (-1.76, | <0.001 |
|                 |   |   |   |   |   |   |   |   | 11.04)  | 7.94)   | -0.95)  |        | 0.26)  | 0.21)  | -0.68)  |        |
|                 |   |   |   |   |   |   |   |   | 7.89    | 6.29    | -0.70   |        | 0.14   | 0.11   | -0.74   |        |
| Sri Lanka       | — | — | — | — | — | — | — | — | (7.25,  | (5.75,  | (-2.07, | 0.320  | (0.06, | (0.05, | (-2.75, | 0.478  |
|                 |   |   |   |   |   |   |   |   | 8.57)   | 6.86)   | 0.69)   |        | 0.25)  | 0.21)  | 1.31)   |        |
|                 |   |   |   |   |   |   |   |   | 5.24    | 5.72    | 0.28    |        | 0.09   | 0.10   | 0.36    |        |
| Sudan           | — | — | — | — | — | — | — | — | (4.71,  | (5.36,  | (0.20,  | <0.001 | (0.03, | (0.05, | (0.36,  | <0.001 |
|                 |   |   |   |   |   |   |   |   | 5.82)   | 6.10)   | 0.37)   |        | 0.20)  | 0.16)  | 0.36)   |        |

|                               |   |   |   |   |   |   |   |   |         |         |         |        |         |         |         |        |
|-------------------------------|---|---|---|---|---|---|---|---|---------|---------|---------|--------|---------|---------|---------|--------|
|                               |   |   |   |   |   |   |   |   | 8.69    | 7.49    | -0.52   |        | 0.15    | 0.13    | -0.49   |        |
| Suriname                      | — | — | — | — | — | — | — | — | (4.48,  | (4.29,  | (-1.91, | 0.469  | (0.00,  | (0.00,  | (-2.64, | 0.660  |
|                               |   |   |   |   |   |   |   |   | 15.46)  | 12.17)  | 0.89)   |        | 3.52)   | 2.04)   | 1.71)   |        |
|                               |   |   |   |   |   |   |   |   | 16.23   | 8.88    | -2.10   |        | 0.28    | 0.16    | -2.04   |        |
| Sweden                        | — | — | — | — | — | — | — | — | (14.83, | (7.91,  | (-2.31, | <0.001 | (0.13,  | (0.05,  | (-2.30, | <0.001 |
|                               |   |   |   |   |   |   |   |   | 17.73)  | 9.94)   | -1.90)  |        | 0.56)   | 0.37)   | -1.79)  |        |
|                               |   |   |   |   |   |   |   |   | 11.92   | 5.10    | -2.99   |        | 0.20    | 0.09    | -2.69   |        |
| Switzerland                   | — | — | — | — | — | — | — | — | (10.66, | (4.32,  | (-3.61, | <0.001 | (0.07,  | (0.02,  | (-3.67, | <0.001 |
|                               |   |   |   |   |   |   |   |   | 13.30)  | 5.99)   | -2.37)  |        | 0.49)   | 0.32)   | -1.70)  |        |
|                               |   |   |   |   |   |   |   |   | 6.62    | 4.79    | -1.13   |        | 0.11    | 0.08    | -1.14   |        |
| Syrian Arab<br>Republic       | — | — | — | — | — | — | — | — | (5.85,  | (4.18,  | (-1.46, | <0.001 | (0.03,  | (0.02,  | (-2.07, | 0.017  |
|                               |   |   |   |   |   |   |   |   | 7.48)   | 5.48)   | -0.81)  |        | 0.29)   | 0.24)   | -0.20)  |        |
|                               |   |   |   |   |   |   |   |   | 6.30    | 15.26   | 3.05    |        | 0.11    | 0.27    | 3.16    |        |
| Taiwan (Province<br>of China) | — | — | — | — | — | — | — | — | (5.81,  | (14.46, | (2.56,  | <0.001 | (0.05,  | (0.17,  | (2.30,  | <0.001 |
|                               |   |   |   |   |   |   |   |   | 6.83)   | 16.11)  | 3.55)   |        | 0.20)   | 0.41)   | 4.03)   |        |
|                               |   |   |   |   |   |   |   |   | 4.27    | 5.22    | 0.70    |        | 0.08    | 0.09    | 0.55    |        |
| Tajikistan                    | — | — | — | — | — | — | — | — | (3.35,  | (4.52,  | (0.44,  | <0.001 | (0.00,  | (0.02,  | (-0.13, | 0.115  |
|                               |   |   |   |   |   |   |   |   | 5.38)   | 6.00)   | 0.97)   |        | 0.39)   | 0.26)   | 1.24)   |        |
|                               |   |   |   |   |   |   |   |   | 6.05    | 7.98    | 1.04    |        | 0.11    | 0.14    | 1.01    |        |
| Thailand                      | — | — | — | — | — | — | — | — | (5.75,  | (7.63,  | (0.45,  | 0.001  | (0.07,  | (0.09,  | (-0.28, | 0.125  |
|                               |   |   |   |   |   |   |   |   | 6.37)   | 8.34)   | 1.63)   |        | 0.16)   | 0.19)   | 2.31)   |        |
|                               |   |   |   |   |   |   |   |   | 2.24    | 4.68    | 2.64    |        | 0.04    | 0.08    | 2.41    |        |
| Timor-Leste                   | — | — | — | — | — | — | — | — | (0.86,  | (2.89,  | (1.89,  | <0.001 | (0.00,  | (0.00,  | (0.56,  | 0.010  |
|                               |   |   |   |   |   |   |   |   | 4.83)   | 7.25)   | 3.39)   |        | 1.55)   | 1.20)   | 4.29)   |        |
|                               |   |   |   |   |   |   |   |   | 8.33    | 8.08    | -0.08   |        | 0.15    | 0.14    | -0.24   |        |
| Togo                          | — | — | — | — | — | — | — | — | (6.73,  | (7.09,  | (-0.38, | 0.582  | (0.01,  | (0.04,  | (-0.62, | 0.206  |
|                               |   |   |   |   |   |   |   |   | 10.23)  | 9.18)   | 0.21)   |        | 0.64)   | 0.36)   | 0.13)   |        |
|                               |   |   |   |   |   |   |   |   | 13.65   | 14.57   | 0.24    |        | 0.24    | 0.26    | 0.27    |        |
| Tokelau                       | — | — | — | — | — | — | — | — | (0.00,  | (0.00,  | (0.10,  | <0.001 | (0.00,  | (0.00,  | (-0.04, | 0.083  |
|                               |   |   |   |   |   |   |   |   | 846.72) | 915.75) | 0.37)   |        | 821.33) | 887.76) | 0.59)   |        |
|                               |   |   |   |   |   |   |   |   | 7.88    | 10.76   | 1.07    |        | 0.14    | 0.19    | 1.19    |        |
| Tonga                         | — | — | — | — | — | — | — | — | (1.11,  | (2.75,  | (0.83,  | <0.001 | (0.00,  | (0.00,  | (0.57,  | <0.001 |
|                               |   |   |   |   |   |   |   |   | 28.53)  | 28.83)  | 1.30)   |        | 15.82)  | 11.73)  | 1.80)   |        |

|                             |   |   |   |   |   |   |   |   |   |         |         |         |        |         |        |         |        |
|-----------------------------|---|---|---|---|---|---|---|---|---|---------|---------|---------|--------|---------|--------|---------|--------|
| Trinidad and Tobago         | — | — | — | — | — | — | — | — | — | 15.08   | 16.49   | 0.47    | 0.27   | 0.29    | 0.46   |         |        |
|                             | — | — | — | — | — | — | — | — | — | (11.81, | (13.32, | (-0.14, | 0.134  | (0.01,  | (0.03, | (-0.24, | 0.198  |
|                             |   |   |   |   |   |   |   |   |   | 18.99)  | 20.27)  | 1.08)   |        | 1.31)   | 1.36)  | 1.17)   |        |
|                             |   |   |   |   |   |   |   |   |   | 4.43    | 5.27    | 0.59    | 0.08   | 0.09    | 0.40   |         |        |
| Tunisia                     | — | — | — | — | — | — | — | — | — | (3.72,  | (4.63,  | (0.51,  | <0.001 | (0.01,  | (0.03, | (0.40,  | <0.001 |
|                             |   |   |   |   |   |   |   |   |   | 5.24)   | 5.98)   | 0.68)   |        | 0.27)   | 0.24)  | 0.40)   |        |
|                             |   |   |   |   |   |   |   |   |   | 20.24   | 11.48   | -1.95   | 0.36   | 0.20    | -1.99  |         |        |
| Turkey                      | — | — | — | — | — | — | — | — | — | (19.65, | (11.13, | (-2.35, | <0.001 | (0.28,  | (0.16, | (-2.36, | <0.001 |
|                             |   |   |   |   |   |   |   |   |   | 20.84)  | 11.84)  | -1.55)  |        | 0.45)   | 0.26)  | -1.63)  |        |
|                             |   |   |   |   |   |   |   |   |   | 3.93    | 12.51   | 4.07    | 0.07   | 0.22    | 4.17   |         |        |
| Turkmenistan                | — | — | — | — | — | — | — | — | — | (2.94,  | (11.03, | (3.08,  | <0.001 | (0.00,  | (0.07, | (3.25,  | <0.001 |
|                             |   |   |   |   |   |   |   |   |   | 5.15)   | 14.14)  | 5.07)   |        | 0.44)   | 0.55)  | 5.09)   |        |
|                             |   |   |   |   |   |   |   |   |   | 17.62   | 22.80   | 0.87    | 0.31   | 0.40    | 0.87   |         |        |
| Tuvalu                      | — | — | — | — | — | — | — | — | — | (0.06,  | (0.60,  | (0.81,  | <0.001 | (0.00,  | (0.00, | (0.63,  | <0.001 |
|                             |   |   |   |   |   |   |   |   |   | 142.21) | 130.98) | 0.94)   |        | 109.20) | 90.45) | 1.10)   |        |
|                             |   |   |   |   |   |   |   |   |   | 9.20    | 9.62    | 0.05    | 0.16   | 0.17    | 0.13   |         |        |
| Uganda                      | — | — | — | — | — | — | — | — | — | (8.38,  | (9.10,  | (-0.14, | 0.637  | (0.07,  | (0.10, | (-0.16, | 0.373  |
|                             |   |   |   |   |   |   |   |   |   | 10.07)  | 10.16)  | 0.24)   |        | 0.32)   | 0.26)  | 0.41)   |        |
|                             |   |   |   |   |   |   |   |   |   | 6.52    | 20.80   | 3.98    | 0.11   | 0.37    | 4.15   |         |        |
| Ukraine                     | — | — | — | — | — | — | — | — | — | (6.17,  | (20.10, | (1.48,  | 0.002  | (0.07,  | (0.28, | (1.17,  | 0.006  |
|                             |   |   |   |   |   |   |   |   |   | 6.88)   | 21.53)  | 6.54)   |        | 0.17)   | 0.48)  | 7.22)   |        |
|                             |   |   |   |   |   |   |   |   |   | 10.20   | 13.16   | 0.82    | 0.18   | 0.23    | 0.85   |         |        |
| United Arab Emirates        | — | — | — | — | — | — | — | — | — | (8.28,  | (11.97, | (0.55,  | <0.001 | (0.02,  | (0.10, | (0.36,  | 0.001  |
|                             |   |   |   |   |   |   |   |   |   | 12.53)  | 14.48)  | 1.08)   |        | 0.93)   | 0.52)  | 1.33)   |        |
|                             |   |   |   |   |   |   |   |   |   | 11.72   | 9.26    | -0.87   | 0.20   | 0.16    | -0.75  |         |        |
| United Kingdom              | — | — | — | — | — | — | — | — | — | (11.26, | (8.88,  | (-1.20, | <0.001 | (0.14,  | (0.11, | (-1.16, | <0.001 |
|                             |   |   |   |   |   |   |   |   |   | 12.19)  | 9.66)   | -0.54)  |        | 0.27)   | 0.22)  | -0.34)  |        |
|                             |   |   |   |   |   |   |   |   |   | 12.89   | 10.14   | -0.84   | 0.22   | 0.17    | -0.96  |         |        |
| United Republic of Tanzania | — | — | — | — | — | — | — | — | — | (12.12, | (9.69,  | (-1.13, | <0.001 | (0.13,  | (0.12, | (-1.38, | <0.001 |
|                             |   |   |   |   |   |   |   |   |   | 13.70)  | 10.59)  | -0.54)  |        | 0.36)   | 0.25)  | -0.54)  |        |
|                             |   |   |   |   |   |   |   |   |   | 13.48   | 11.23   | -0.68   | 0.23   | 0.20    | -0.53  |         |        |
| United States of America    | — | — | — | — | — | — | — | — | — | (13.26, | (11.04, | (-1.07, | 0.001  | (0.21,  | (0.17, | (-1.17, | 0.108  |
|                             |   |   |   |   |   |   |   |   |   | 13.70)  | 11.42)  | -0.29)  |        | 0.27)   | 0.23)  | 0.12)   |        |

|                |   |   |   |   |   |   |   |   |         |         |         |        |        |        |         |        |
|----------------|---|---|---|---|---|---|---|---|---------|---------|---------|--------|--------|--------|---------|--------|
| United States  |   |   |   |   |   |   |   |   | 9.61    | 5.42    | -2.00   |        | 0.17   | 0.10   | -2.06   |        |
| Virgin Islands | — | — | — | — | — | — | — | — | (2.51,  | (0.52,  | (-2.35, | <0.001 | (0.00, | (0.00, | (-2.89, | <0.001 |
|                |   |   |   |   |   |   |   |   | 25.67)  | 22.43)  | -1.64)  |        | 10.58) | 13.39) | -1.22)  |        |
|                |   |   |   |   |   |   |   |   | 15.67   | 14.24   | -0.32   |        | 0.27   | 0.25   | -0.23   |        |
| Uruguay        | — | — | — | — | — | — | — | — | (13.45, | (12.21, | (-0.92, | 0.300  | (0.06, | (0.05, | (-0.98, | 0.552  |
|                |   |   |   |   |   |   |   |   | 18.16)  | 16.53)  | 0.29)   |        | 0.79)  | 0.73)  | 0.53)   |        |
|                |   |   |   |   |   |   |   |   | 1.92    | 5.87    | 3.92    |        | 0.03   | 0.10   | 3.83    |        |
| Uzbekistan     | — | — | — | — | — | — | — | — | (1.62,  | (5.48,  | (3.49,  | <0.001 | (0.01, | (0.06, | (2.79,  | <0.001 |
|                |   |   |   |   |   |   |   |   | 2.25)   | 6.28)   | 4.35)   |        | 0.11)  | 0.17)  | 4.89)   |        |
|                |   |   |   |   |   |   |   |   | 17.86   | 22.54   | 0.77    |        | 0.32   | 0.40   | 0.74    |        |
| Vanuatu        | — | — | — | — | — | — | — | — | (8.24,  | (14.49, | (0.63,  | <0.001 | (0.00, | (0.00, | (0.40,  | <0.001 |
|                |   |   |   |   |   |   |   |   | 34.02)  | 33.58)  | 0.91)   |        | 8.48)  | 4.52)  | 1.08)   |        |
| Venezuela      |   |   |   |   |   |   |   |   | 6.30    | 8.16    | 0.92    |        | 0.11   | 0.14   | 0.90    |        |
| (Bolivarian    | — | — | — | — | — | — | — | — | (5.74,  | (7.63,  | (0.38,  | 0.001  | (0.05, | (0.08, | (-0.00, | 0.050  |
| Republic of)   |   |   |   |   |   |   |   |   | 6.90)   | 8.71)   | 1.46)   |        | 0.22)  | 0.23)  | 1.81)   |        |
|                |   |   |   |   |   |   |   |   | 5.33    | 6.34    | 0.61    |        | 0.09   | 0.11   | 0.76    |        |
| Viet Nam       | — | — | — | — | — | — | — | — | (5.05,  | (6.10,  | (0.50,  | <0.001 | (0.06, | (0.08, | (0.41,  | <0.001 |
|                |   |   |   |   |   |   |   |   | 5.62)   | 6.59)   | 0.72)   |        | 0.14)  | 0.15)  | 1.12)   |        |
|                |   |   |   |   |   |   |   |   | 3.98    | 5.09    | 0.93    |        | 0.07   | 0.09   | 1.20    |        |
| Yemen          | — | — | — | — | — | — | — | — | (3.39,  | (4.70,  | (0.68,  | <0.001 | (0.01, | (0.04, | (0.10,  | 0.032  |
|                |   |   |   |   |   |   |   |   | 4.65)   | 5.50)   | 1.18)   |        | 0.22)  | 0.16)  | 2.31)   |        |
|                |   |   |   |   |   |   |   |   | 10.09   | 11.42   | 0.42    |        | 0.17   | 0.20   | 0.51    |        |
| Zambia         | — | — | — | — | — | — | — | — | (8.85,  | (10.62, | (0.17,  | 0.001  | (0.05, | (0.11, | (-0.09, | 0.097  |
|                |   |   |   |   |   |   |   |   | 11.46)  | 12.27)  | 0.67)   |        | 0.47)  | 0.34)  | 1.12)   |        |
|                |   |   |   |   |   |   |   |   | 9.15    | 14.44   | 1.60    |        | 0.16   | 0.25   | 1.59    |        |
| Zimbabwe       | — | — | — | — | — | — | — | — | (8.13,  | (13.46, | (1.21,  | <0.001 | (0.05, | (0.14, | (0.87,  | <0.001 |
|                |   |   |   |   |   |   |   |   | 10.27)  | 15.47)  | 1.98)   |        | 0.38)  | 0.43)  | 2.31)   |        |
| <b>Women</b>   |   |   |   |   |   |   |   |   |         |         |         |        |        |        |         |        |
|                |   |   |   |   |   |   |   |   | 2.52    | 2.61    | 0.14    |        | 0.04   | 0.04   | 0.00    |        |
| Afghanistan    | — | — | — | — | — | — | — | — | (1.81,  | (2.22,  | (0.09,  | <0.001 | (0.00, | (0.01, | (0.00,  | 0.004  |
|                |   |   |   |   |   |   |   |   | 3.47)   | 3.06)   | 0.19)   |        | 0.40)  | 0.15)  | 0.00)*  |        |
|                |   |   |   |   |   |   |   |   | 5.32    | 4.75    | -0.47   |        | 0.09   | 0.08   | -0.49   |        |
| Albania        | — | — | — | — | — | — | — | — | (3.70,  | (2.99,  | (-0.93, | 0.048  | (0.00, | (0.00, | (-1.22, | 0.184  |

|                     |   |   |   |   |   |   |   |   |        |        |         |        |        |        |         |        |
|---------------------|---|---|---|---|---|---|---|---|--------|--------|---------|--------|--------|--------|---------|--------|
|                     |   |   |   |   |   |   |   |   | 7.44)  | 7.21)  | -0.00)  |        | 0.83)  | 1.03)  | 0.24)   |        |
|                     |   |   |   |   |   |   |   |   | 3.44   | 3.51   | 0.06    |        | 0.06   | 0.06   | 0.00    |        |
| Algeria             | — | — | — | — | — | — | — | — | (2.92, | (3.12, | (-0.12, | 0.510  | (0.01, | (0.02, | (0.00,  | <0.001 |
|                     |   |   |   |   |   |   |   |   | 4.04)  | 3.93)  | 0.25)   |        | 0.20)  | 0.14)  | 0.00)*  |        |
|                     |   |   |   |   |   |   |   |   | 6.38   | 3.52   | -2.03   |        | 0.12   | 0.06   | -2.35   |        |
| American Samoa      | — | — | — | — | — | — | — | — | (0.01, | (0.00, | (-2.59, | <0.001 | (0.00, | (0.00, | (-3.45, | <0.001 |
|                     |   |   |   |   |   |   |   |   | 59.67) | 52.43) | -1.46)  |        | 47.97) | 45.78) | -1.24)  |        |
|                     |   |   |   |   |   |   |   |   | 6.98   | 6.27   | -0.36   |        | 0.12   | 0.11   | -0.37   |        |
| Andorra             | — | — | — | — | — | — | — | — | (0.10, | (0.09, | (-0.54, | <0.001 | (0.00, | (0.00, | (-0.58, | 0.001  |
|                     |   |   |   |   |   |   |   |   | 53.88) | 49.43) | -0.18)  |        | 42.97) | 39.77) | -0.15)  |        |
|                     |   |   |   |   |   |   |   |   | 5.13   | 4.95   | -0.25   |        | 0.09   | 0.09   | 0.03    |        |
| Angola              | — | — | — | — | — | — | — | — | (4.12, | (4.36, | (-0.47, | 0.021  | (0.01, | (0.03, | (-0.33, | 0.876  |
|                     |   |   |   |   |   |   |   |   | 6.33)  | 5.60)  | -0.04)  |        | 0.40)  | 0.22)  | 0.39)   |        |
|                     |   |   |   |   |   |   |   |   | 3.47   | 2.16   | -1.68   |        | 0.06   | 0.04   | -1.86   |        |
| Antigua and Barbuda | — | — | — | — | — | — | — | — | (0.00, | (0.00, | (-2.14, | <0.001 | (0.00, | (0.00, | (-2.24, | <0.001 |
|                     |   |   |   |   |   |   |   |   | 37.80) | 27.95) | -1.22)  |        | 31.39) | 24.17) | -1.47)  |        |
|                     |   |   |   |   |   |   |   |   | 5.81   | 4.95   | -0.56   |        | 0.10   | 0.09   | -0.49   |        |
| Argentina           | — | — | — | — | — | — | — | — | (5.22, | (4.50, | (-0.88, | 0.001  | (0.04, | (0.04, | (-0.97, | 0.045  |
|                     |   |   |   |   |   |   |   |   | 6.45)  | 5.44)  | -0.23)  |        | 0.22)  | 0.17)  | -0.01)  |        |
|                     |   |   |   |   |   |   |   |   | 4.56   | 6.37   | 1.19    |        | 0.08   | 0.12   | 1.22    |        |
| Armenia             | — | — | — | — | — | — | — | — | (3.15, | (4.60, | (0.82,  | <0.001 | (0.00, | (0.00, | (0.70,  | <0.001 |
|                     |   |   |   |   |   |   |   |   | 6.43)  | 8.79)  | 1.56)   |        | 0.74)  | 1.20)  | 1.74)   |        |
|                     |   |   |   |   |   |   |   |   | 5.42   | 2.91   | -2.12   |        | 0.09   | 0.05   | -2.04   |        |
| Australia           | — | — | — | — | — | — | — | — | (4.67, | (2.43, | (-2.35, | <0.001 | (0.02, | (0.01, | (-2.49, | <0.001 |
|                     |   |   |   |   |   |   |   |   | 6.26)  | 3.46)  | -1.90)  |        | 0.27)  | 0.19)  | -1.59)  |        |
|                     |   |   |   |   |   |   |   |   | 10.19  | 7.02   | -1.28   |        | 0.18   | 0.12   | -1.53   |        |
| Austria             | — | — | — | — | — | — | — | — | (8.63, | (5.74, | (-1.75, | <0.001 | (0.03, | (0.01, | (-2.15, | <0.001 |
|                     |   |   |   |   |   |   |   |   | 11.97) | 8.54)  | -0.81)  |        | 0.60)  | 0.56)  | -0.91)  |        |
|                     |   |   |   |   |   |   |   |   | 1.97   | 2.30   | 0.53    |        | 0.04   | 0.04   | 0.00    |        |
| Azerbaijan          | — | — | — | — | — | — | — | — | (1.31, | (1.71, | (0.32,  | <0.001 | (0.00, | (0.00, | (0.00,  | <0.001 |
|                     |   |   |   |   |   |   |   |   | 2.87)  | 3.05)  | 0.74)   |        | 0.36)  | 0.32)  | 0.00)*  |        |
|                     |   |   |   |   |   |   |   |   | 9.31   | 9.17   | 0.07    |        | 0.16   | 0.16   | 0.14    |        |
| Bahamas             | — | — | — | — | — | — | — | — | (3.10, | (3.75, | (-0.28, | 0.692  | (0.00, | (0.00, | (-0.26, | 0.501  |

|                |   |   |   |   |   |   |   |   |        |         |         |        |        |        |         |        |
|----------------|---|---|---|---|---|---|---|---|--------|---------|---------|--------|--------|--------|---------|--------|
|                |   |   |   |   |   |   |   |   | 21.91) | 18.96)  | 0.42)   |        | 7.86)  | 5.56)  | 0.54)   |        |
|                |   |   |   |   |   |   |   |   | 2.43   | 2.07    | -0.56   |        | 0.04   | 0.04   | -0.21   |        |
| Bahrain        | — | — | — | — | — | — | — | — | (0.38, | (0.67,  | (-0.90, | 0.001  | (0.00, | (0.00, | (-4.32, | 0.921  |
|                |   |   |   |   |   |   |   |   | 8.57)  | 5.13)   | -0.22)  |        | 4.73)  | 2.08)  | 4.07)   |        |
|                |   |   |   |   |   |   |   |   | 3.58   | 4.08    | 0.49    |        | 0.06   | 0.07   | 0.53    |        |
| Bangladesh     | — | — | — | — | — | — | — | — | (3.31, | (3.87,  | (0.10,  | 0.015  | (0.03, | (0.05, | (-0.32, | 0.223  |
|                |   |   |   |   |   |   |   |   | 3.88)  | 4.30)   | 0.88)   |        | 0.11)  | 0.11)  | 1.39)   |        |
|                |   |   |   |   |   |   |   |   | 3.22   | 2.90    | -0.34   |        | 0.06   | 0.05   | -0.61   |        |
| Barbados       | — | — | — | — | — | — | — | — | (0.33, | (0.22,  | (-1.05, | 0.343  | (0.00, | (0.00, | (-0.61, | <0.001 |
|                |   |   |   |   |   |   |   |   | 12.80) | 13.16)  | 0.37)   |        | 7.37)  | 8.38)  | -0.61)  |        |
|                |   |   |   |   |   |   |   |   | 3.86   | 5.46    | 1.17    |        | 0.07   | 0.10   | 1.04    |        |
| Belarus        | — | — | — | — | — | — | — | — | (3.06, | (4.40,  | (0.82,  | <0.001 | (0.00, | (0.01, | (0.52,  | <0.001 |
|                |   |   |   |   |   |   |   |   | 4.82)  | 6.75)   | 1.52)   |        | 0.33)  | 0.51)  | 1.57)   |        |
|                |   |   |   |   |   |   |   |   | 5.64   | 3.52    | -1.70   |        | 0.10   | 0.06   | -2.12   |        |
| Belgium        | — | — | — | — | — | — | — | — | (4.63, | (2.73,  | (-1.91, | <0.001 | (0.01, | (0.00, | (-2.30, | <0.001 |
|                |   |   |   |   |   |   |   |   | 6.83)  | 4.50)   | -1.49)  |        | 0.41)  | 0.36)  | -1.94)  |        |
|                |   |   |   |   |   |   |   |   | 3.45   | 3.77    | 0.34    |        | 0.06   | 0.07   | 0.60    |        |
| Belize         | — | — | — | — | — | — | — | — | (0.09, | (0.84,  | (-0.08, | 0.113  | (0.00, | (0.00, | (-0.39, | 0.236  |
|                |   |   |   |   |   |   |   |   | 21.12) | 10.82)  | 0.76)   |        | 15.33) | 4.74)  | 1.61)   |        |
|                |   |   |   |   |   |   |   |   | 5.26   | 3.46    | -1.42   |        | 0.10   | 0.06   | -1.76   |        |
| Benin          | — | — | — | — | — | — | — | — | (3.75, | (2.71,  | (-1.73, | <0.001 | (0.00, | (0.00, | (-2.06, | <0.001 |
|                |   |   |   |   |   |   |   |   | 7.18)  | 4.36)   | -1.11)  |        | 0.71)  | 0.31)  | -1.46)  |        |
|                |   |   |   |   |   |   |   |   | 5.61   | 2.96    | -2.21   |        | 0.10   | 0.05   | -2.38   |        |
| Bermuda        | — | — | — | — | — | — | — | — | (0.06, | (0.00,  | (-2.77, | <0.001 | (0.00, | (0.00, | (-3.19, | <0.001 |
|                |   |   |   |   |   |   |   |   | 49.53) | 57.35)  | -1.64)  |        | 41.22) | 52.70) | -1.58)  |        |
|                |   |   |   |   |   |   |   |   | 2.06   | 3.11    | 1.41    |        | 0.04   | 0.05   | 0.78    |        |
| Bhutan         | — | — | — | — | — | — | — | — | (0.25, | (1.02,  | (1.25,  | <0.001 | (0.00, | (0.00, | (-0.58, | 0.263  |
|                |   |   |   |   |   |   |   |   | 7.86)  | 7.26)   | 1.56)   |        | 4.50)  | 2.48)  | 2.15)   |        |
| Bolivia        |   |   |   |   |   |   |   |   | 5.33   | 5.42    | 0.06    |        | 0.09   | 0.09   | 0.09    |        |
| (Plurinational | — | — | — | — | — | — | — | — | (4.10, | (4.53,  | (-0.08, | 0.411  | (0.00, | (0.01, | (-0.32, | 0.662  |
| State of)      |   |   |   |   |   |   |   |   | 6.82)  | 6.45)   | 0.20)   |        | 0.51)  | 0.32)  | 0.51)   |        |
| Bosnia and     |   |   |   |   |   |   |   |   | 10.73  | 13.15   | 0.68    |        | 0.19   | 0.24   | 0.80    |        |
| Herzegovina    | — | — | — | — | — | — | — | — | (8.74, | (10.34, | (0.38,  | <0.001 | (0.02, | (0.01, | (0.31,  | 0.001  |



|                   |   |   |   |   |   |   |   |   |        |         |         |        |        |        |         |        |
|-------------------|---|---|---|---|---|---|---|---|--------|---------|---------|--------|--------|--------|---------|--------|
|                   |   |   |   |   |   |   |   |   | 13.03) | 16.57)  | 0.98)   |        | 0.76)  | 1.26)  | 1.29)   |        |
|                   |   |   |   |   |   |   |   |   | 11.63  | 7.85    | -1.34   |        | 0.20   | 0.14   | -1.41   |        |
| Botswana          | — | — | — | — | — | — | — | — | (7.65, | (5.68,  | (-1.58, | <0.001 | (0.00, | (0.00, | (-2.08, | <0.001 |
|                   |   |   |   |   |   |   |   |   | 17.07) | 10.61)  | -1.11)  |        | 2.26)  | 1.01)  | -0.74)  |        |
|                   |   |   |   |   |   |   |   |   | 9.92   | 11.53   | 0.58    |        | 0.18   | 0.20   | 0.44    |        |
| Brazil            | — | — | — | — | — | — | — | — | (9.56, | (11.22, | (0.34,  | <0.001 | (0.13, | (0.17, | (0.17,  | 0.002  |
|                   |   |   |   |   |   |   |   |   | 10.29) | 11.85)  | 0.82)   |        | 0.23)  | 0.25)  | 0.72)   |        |
|                   |   |   |   |   |   |   |   |   | 8.32   | 7.98    | -0.13   |        | 0.15   | 0.14   | -0.24   |        |
| Brunei Darussalam | — | — | — | — | — | — | — | — | (2.55, | (3.43,  | (-0.22, | 0.005  | (0.00, | (0.00, | (-0.67, | 0.270  |
|                   |   |   |   |   |   |   |   |   | 20.46) | 16.30)  | -0.04)  |        | 7.67)  | 5.01)  | 0.19)   |        |
|                   |   |   |   |   |   |   |   |   | 10.74  | 15.06   | 1.20    |        | 0.18   | 0.26   | 1.23    |        |
| Bulgaria          | — | — | — | — | — | — | — | — | (9.16, | (12.76, | (0.52,  | 0.001  | (0.04, | (0.05, | (0.53,  | <0.001 |
|                   |   |   |   |   |   |   |   |   | 12.54) | 17.71)  | 1.88)   |        | 0.57)  | 0.92)  | 1.93)   |        |
|                   |   |   |   |   |   |   |   |   | 4.94   | 3.06    | -1.63   |        | 0.09   | 0.06   | -1.27   |        |
| Burkina Faso      | — | — | — | — | — | — | — | — | (3.85, | (2.53,  | (-1.85, | <0.001 | (0.00, | (0.01, | (-2.13, | 0.004  |
|                   |   |   |   |   |   |   |   |   | 6.25)  | 3.66)   | -1.41)  |        | 0.44)  | 0.20)  | -0.41)  |        |
|                   |   |   |   |   |   |   |   |   | 7.82   | 4.62    | -1.80   |        | 0.14   | 0.08   | -1.88   |        |
| Burundi           | — | — | — | — | — | — | — | — | (6.15, | (3.75,  | (-1.97, | <0.001 | (0.01, | (0.01, | (-2.10, | <0.001 |
|                   |   |   |   |   |   |   |   |   | 9.84)  | 5.64)   | -1.63)  |        | 0.70)  | 0.34)  | -1.67)  |        |
|                   |   |   |   |   |   |   |   |   | 3.83   | 3.60    | -0.21   |        | 0.07   | 0.06   | -0.52   |        |
| Cabo Verde        | — | — | — | — | — | — | — | — | (0.51, | (1.03,  | (-0.41, | 0.041  | (0.00, | (0.00, | (-0.52, | <0.001 |
|                   |   |   |   |   |   |   |   |   | 14.47) | 9.09)   | -0.01)  |        | 8.41)  | 3.46)  | -0.52)  |        |
|                   |   |   |   |   |   |   |   |   | 2.41   | 3.29    | 1.09    |        | 0.04   | 0.06   | 1.39    |        |
| Cambodia          | — | — | — | — | — | — | — | — | (1.76, | (2.72,  | (0.99,  | <0.001 | (0.00, | (0.01, | (1.39,  | <0.001 |
|                   |   |   |   |   |   |   |   |   | 3.24)  | 3.95)   | 1.19)   |        | 0.30)  | 0.21)  | 1.39)   |        |
|                   |   |   |   |   |   |   |   |   | 6.63   | 4.12    | -1.62   |        | 0.12   | 0.07   | -1.91   |        |
| Cameroon          | — | — | — | — | — | — | — | — | (5.41, | (3.59,  | (-1.82, | <0.001 | (0.01, | (0.02, | (-2.23, | <0.001 |
|                   |   |   |   |   |   |   |   |   | 8.05)  | 4.71)   | -1.41)  |        | 0.47)  | 0.20)  | -1.59)  |        |
|                   |   |   |   |   |   |   |   |   | 5.13   | 3.09    | -1.71   |        | 0.09   | 0.05   | -1.99   |        |
| Canada            | — | — | — | — | — | — | — | — | (4.56, | (2.66,  | (-2.01, | <0.001 | (0.03, | (0.01, | (-2.65, | <0.001 |
|                   |   |   |   |   |   |   |   |   | 5.76)  | 3.58)   | -1.41)  |        | 0.22)  | 0.16)  | -1.32)  |        |
| Central African   | — | — | — | — | — | — | — | — | 4.54   | 3.18    | -1.33   | <0.001 | 0.08   | 0.06   | -0.92   | 0.362  |
| Republic          | — | — | — | — | — | — | — | — | (2.79, | (2.15,  | (-1.50, |        | (0.00, | (0.00, | (-2.87, |        |

|               |   |   |   |   |   |   |   |   |         |         |         |        |         |         |         |        |
|---------------|---|---|---|---|---|---|---|---|---------|---------|---------|--------|---------|---------|---------|--------|
|               |   |   |   |   |   |   |   |   | 7.04    | 4.55    | -1.16   |        | 1.12    | 0.54    | 1.07)   |        |
|               |   |   |   |   |   |   |   |   | 4.98    | 2.95    | -1.78   |        | 0.09    | 0.05    | -2.21   |        |
| Chad          | — | — | — | — | — | — | — | — | (3.65,  | (2.31,  | (-2.05, | <0.001 | (0.00,  | (0.00,  | (-2.57, | <0.001 |
|               |   |   |   |   |   |   |   |   | 6.65)   | 3.73)   | -1.52)  |        | 0.59)   | 0.27)   | -1.85)  |        |
|               |   |   |   |   |   |   |   |   | 5.37    | 6.93    | 0.89    |        | 0.09    | 0.12    | 1.05    |        |
| Chile         | — | — | — | — | — | — | — | — | (4.55,  | (6.07,  | (0.76,  | <0.001 | (0.02,  | (0.03,  | (0.32,  | 0.005  |
|               |   |   |   |   |   |   |   |   | 6.30)   | 7.87)   | 1.03)   |        | 0.30)   | 0.32)   | 1.79)   |        |
|               |   |   |   |   |   |   |   |   | 3.33    | 2.82    | -0.67   |        | 0.06    | 0.05    | -0.56   |        |
| China         | — | — | — | — | — | — | — | — | (3.26,  | (2.76,  | (-1.42, | 0.079  | (0.05,  | (0.04,  | (-1.15, | 0.063  |
|               |   |   |   |   |   |   |   |   | 3.40)   | 2.89)   | 0.08)   |        | 0.07)   | 0.06)   | 0.03)   |        |
|               |   |   |   |   |   |   |   |   | 8.69    | 7.78    | -0.22   |        | 0.15    | 0.14    | -0.33   |        |
| Colombia      | — | — | — | — | — | — | — | — | (8.00,  | (7.24,  | (-0.54, | 0.184  | (0.07,  | (0.07,  | (-0.70, | 0.078  |
|               |   |   |   |   |   |   |   |   | 9.44)   | 8.36)   | 0.10)   |        | 0.28)   | 0.23)   | 0.04)   |        |
|               |   |   |   |   |   |   |   |   | 8.38    | 6.63    | -0.81   |        | 0.15    | 0.11    | -0.97   |        |
| Comoros       | — | — | — | — | — | — | — | — | (3.15,  | (3.06,  | (-3.42, | 0.551  | (0.00,  | (0.00,  | (-3.66, | 0.488  |
|               |   |   |   |   |   |   |   |   | 18.53)  | 12.62)  | 1.87)   |        | 6.25)   | 3.14)   | 1.80)   |        |
|               |   |   |   |   |   |   |   |   | 5.55    | 4.94    | -0.33   |        | 0.10    | 0.09    | -0.29   |        |
| Congo         | — | — | — | — | — | — | — | — | (3.49,  | (3.70,  | (-0.62, | 0.034  | (0.00,  | (0.00,  | (-0.53, | 0.018  |
|               |   |   |   |   |   |   |   |   | 8.45)   | 6.48)   | -0.03)  |        | 1.24)   | 0.52)   | -0.05)  |        |
|               |   |   |   |   |   |   |   |   | 7.33    | 4.27    | -1.85   |        | 0.13    | 0.08    | -1.73   |        |
| Cook Islands  | — | — | — | — | — | — | — | — | (0.00,  | (0.00,  | (-1.92, | <0.001 | (0.00,  | (0.00,  | (-2.15, | <0.001 |
|               |   |   |   |   |   |   |   |   | 135.27) | 132.48) | -1.79)  |        | 121.16) | 123.98) | -1.32)  |        |
|               |   |   |   |   |   |   |   |   | 6.04    | 9.17    | 1.62    |        | 0.10    | 0.16    | 1.70    |        |
| Costa Rica    | — | — | — | — | — | — | — | — | (4.25,  | (7.41,  | (1.46,  | <0.001 | (0.00,  | (0.01,  | (1.50,  | <0.001 |
|               |   |   |   |   |   |   |   |   | 8.36)   | 11.25)  | 1.79)   |        | 0.88)   | 0.71)   | 1.89)   |        |
|               |   |   |   |   |   |   |   |   | 5.49    | 3.22    | -1.82   |        | 0.10    | 0.06    | -1.65   |        |
| Cote d'Ivoire | — | — | — | — | — | — | — | — | (4.45,  | (2.74,  | (-2.06, | <0.001 | (0.01,  | (0.01,  | (-2.07, | <0.001 |
|               |   |   |   |   |   |   |   |   | 6.71)   | 3.77)   | -1.58)  |        | 0.41)   | 0.18)   | -1.23)  |        |
|               |   |   |   |   |   |   |   |   | 4.92    | 6.51    | 0.92    |        | 0.08    | 0.11    | 1.14    |        |
| Croatia       | — | — | — | — | — | — | — | — | (3.59,  | (4.72,  | (0.52,  | <0.001 | (0.00,  | (0.00,  | (0.68,  | <0.001 |
|               |   |   |   |   |   |   |   |   | 6.61)   | 8.84)   | 1.33)   |        | 0.63)   | 0.96)   | 1.60)   |        |
|               |   |   |   |   |   |   |   |   | 4.02    | 3.34    | -0.66   |        | 0.07    | 0.06    | -0.50   |        |
| Cuba          | — | — | — | — | — | — | — | — | (3.23,  | (2.55,  | (-0.91, | <0.001 | (0.01,  | (0.00,  | (-1.17, | 0.142  |

|                   |   |   |   |   |   |   |   |   |        |        |         |        |        |        |         |        |
|-------------------|---|---|---|---|---|---|---|---|--------|--------|---------|--------|--------|--------|---------|--------|
|                   |   |   |   |   |   |   |   |   | 4.95)  | 4.31)  | -0.40)  |        | 0.31)  | 0.34)  | 0.17)   |        |
|                   |   |   |   |   |   |   |   |   | 6.37   | 3.40   | -2.15   |        | 0.11   | 0.06   | -2.30   |        |
| Cyprus            | — | — | — | — | — | — | — | — | (3.02, | (1.53, | (-2.65, | <0.001 | (0.00, | (0.00, | (-3.75, | 0.002  |
|                   |   |   |   |   |   |   |   |   | 11.97) | 7.11)  | -1.65)  |        | 2.96)  | 2.63)  | -0.82)  |        |
|                   |   |   |   |   |   |   |   |   | 6.19   | 7.97   | 0.91    |        | 0.11   | 0.14   | 0.82    |        |
| Czechia           | — | — | — | — | — | — | — | — | (5.12, | (6.67, | (0.39,  | 0.001  | (0.01, | (0.02, | (-0.36, | 0.176  |
|                   |   |   |   |   |   |   |   |   | 7.43)  | 9.50)  | 1.43)   |        | 0.41)  | 0.56)  | 2.01)   |        |
| Democratic        |   |   |   |   |   |   |   |   | 4.48   | 4.90   | 0.30    |        | 0.08   | 0.08   | 0.00    |        |
| People's Republic | — | — | — | — | — | — | — | — | (3.85, | (4.30, | (0.25,  | <0.001 | (0.02, | (0.02, | (0.00,  | <0.001 |
| of Korea          |   |   |   |   |   |   |   |   | 5.19)  | 5.57)  | 0.34)   |        | 0.23)  | 0.22)  | 0.00)*  |        |
| Democratic        |   |   |   |   |   |   |   |   | 5.39   | 4.16   | -0.94   |        | 0.09   | 0.07   | -1.09   |        |
| Republic of the   | — | — | — | — | — | — | — | — | (4.82, | (3.84, | (-1.20, | <0.001 | (0.03, | (0.04, | (-1.56, | <0.001 |
| Congo             |   |   |   |   |   |   |   |   | 6.00)  | 4.50)  | -0.67)  |        | 0.21)  | 0.13)  | -0.62)  |        |
|                   |   |   |   |   |   |   |   |   | 6.37   | 4.15   | -1.43   |        | 0.11   | 0.07   | -1.60   |        |
| Denmark           | — | — | — | — | — | — | — | — | (4.88, | (2.93, | (-1.84, | <0.001 | (0.00, | (0.00, | (-2.03, | <0.001 |
|                   |   |   |   |   |   |   |   |   | 8.20)  | 5.73)  | -1.02)  |        | 0.64)  | 0.61)  | -1.17)  |        |
|                   |   |   |   |   |   |   |   |   | 7.46   | 4.79   | -1.61   |        | 0.13   | 0.08   | -1.51   |        |
| Djibouti          | — | — | — | — | — | — | — | — | (2.63, | (2.48, | (-2.48, | <0.001 | (0.00, | (0.00, | (-2.40, | 0.001  |
|                   |   |   |   |   |   |   |   |   | 17.00) | 8.48)  | -0.73)  |        | 5.86)  | 1.92)  | -0.62)  |        |
|                   |   |   |   |   |   |   |   |   | 9.20   | 8.10   | -0.39   |        | 0.16   | 0.14   | -0.40   |        |
| Dominica          | — | — | — | — | — | — | — | — | (0.34, | (0.22, | (-1.01, | 0.233  | (0.00, | (0.00, | (-0.98, | 0.180  |
|                   |   |   |   |   |   |   |   |   | 50.80) | 45.08) | 0.25)   |        | 35.15) | 30.29) | 0.19)   |        |
|                   |   |   |   |   |   |   |   |   | 3.77   | 4.82   | 0.91    |        | 0.07   | 0.08   | 0.43    |        |
| Dominican         | — | — | — | — | — | — | — | — | (2.82, | (3.94, | (0.38,  | 0.001  | (0.00, | (0.01, | (-0.40, | 0.312  |
| Republic          |   |   |   |   |   |   |   |   | 4.95)  | 5.84)  | 1.43)   |        | 0.43)  | 0.33)  | 1.27)   |        |
|                   |   |   |   |   |   |   |   |   | 7.09   | 6.25   | -0.52   |        | 0.12   | 0.11   | -0.33   |        |
| Ecuador           | — | — | — | — | — | — | — | — | (5.96, | (5.45, | (-0.92, | 0.011  | (0.02, | (0.03, | (-1.15, | 0.428  |
|                   |   |   |   |   |   |   |   |   | 8.39)  | 7.13)  | -0.12)  |        | 0.42)  | 0.28)  | 0.49)   |        |
|                   |   |   |   |   |   |   |   |   | 5.51   | 6.22   | 0.46    |        | 0.09   | 0.10   | 0.35    |        |
| Egypt             | — | — | — | — | — | — | — | — | (5.07, | (5.88, | (0.24,  | <0.001 | (0.04, | (0.06, | (0.35,  | <0.001 |
|                   |   |   |   |   |   |   |   |   | 5.98)  | 6.58)  | 0.67)   |        | 0.17)  | 0.16)  | 0.35)   |        |
|                   |   |   |   |   |   |   |   |   | 3.23   | 2.71   | -0.57   |        | 0.05   | 0.05   | 0.13    |        |
| El Salvador       | — | — | — | — | — | — | — | — | (2.21, | (1.90, | (-1.34, | 0.148  | (0.00, | (0.00, | (0.13,  | <0.001 |

|                   |   |   |   |   |   |   |   |   |        |        |         |        |        |        |         |        |
|-------------------|---|---|---|---|---|---|---|---|--------|--------|---------|--------|--------|--------|---------|--------|
|                   |   |   |   |   |   |   |   |   | 4.61)  | 3.76)  | 0.20)   |        | 0.56)  | 0.39)  | 0.13)   |        |
|                   |   |   |   |   |   |   |   |   | 4.61   | 4.82   | 0.14    |        | 0.08   | 0.08   | -0.20   |        |
| Equatorial Guinea | — | — | — | — | — | — | — | — | (1.09, | (2.49, | (-0.20, | 0.411  | (0.00, | (0.00, | (-0.47, | 0.138  |
|                   |   |   |   |   |   |   |   |   | 12.94) | 8.52)  | 0.48)   |        | 5.60)  | 1.86)  | 0.07)   |        |
|                   |   |   |   |   |   |   |   |   | 5.94   | 4.91   | -0.71   |        | 0.10   | 0.09   | -0.49   |        |
| Eritrea           | — | — | — | — | — | — | — | — | (3.99, | (3.75, | (-0.99, | <0.001 | (0.00, | (0.00, | (-1.11, | 0.123  |
|                   |   |   |   |   |   |   |   |   | 8.55)  | 6.32)  | -0.43)  |        | 1.04)  | 0.49)  | 0.13)   |        |
|                   |   |   |   |   |   |   |   |   | 5.65   | 4.63   | -0.73   |        | 0.10   | 0.08   | -0.80   |        |
| Estonia           | — | — | — | — | — | — | — | — | (3.26, | (2.16, | (-1.93, | 0.242  | (0.00, | (0.00, | (-2.24, | 0.285  |
|                   |   |   |   |   |   |   |   |   | 9.22)  | 9.11)  | 0.49)   |        | 1.69)  | 2.82)  | 0.67)   |        |
|                   |   |   |   |   |   |   |   |   | 10.21  | 7.14   | -1.22   |        | 0.18   | 0.12   | -1.30   |        |
| Eswatini          | — | — | — | — | — | — | — | — | (5.56, | (4.21, | (-1.61, | <0.001 | (0.00, | (0.00, | (-1.68, | <0.001 |
|                   |   |   |   |   |   |   |   |   | 17.45) | 11.42) | -0.84)  |        | 3.62)  | 1.94)  | -0.91)  |        |
|                   |   |   |   |   |   |   |   |   | 6.05   | 4.31   | -1.17   |        | 0.11   | 0.07   | -1.54   |        |
| Ethiopia          | — | — | — | — | — | — | — | — | (5.54, | (4.02, | (-1.40, | <0.001 | (0.05, | (0.04, | (-1.99, | <0.001 |
|                   |   |   |   |   |   |   |   |   | 6.59)  | 4.61)  | -0.94)  |        | 0.20)  | 0.13)  | -1.09)  |        |
|                   |   |   |   |   |   |   |   |   | 9.08   | 9.02   | -0.02   |        | 0.17   | 0.16   | -0.21   |        |
| Fiji              | — | — | — | — | — | — | — | — | (4.84, | (5.17, | (-0.22, | 0.810  | (0.00, | (0.00, | (-0.21, | <0.001 |
|                   |   |   |   |   |   |   |   |   | 15.61) | 14.66) | 0.17)   |        | 3.08)  | 2.49)  | -0.21)  |        |
|                   |   |   |   |   |   |   |   |   | 6.84   | 5.37   | -0.86   |        | 0.12   | 0.09   | -1.03   |        |
| Finland           | — | — | — | — | — | — | — | — | (5.30, | (3.95, | (-1.39, | 0.002  | (0.01, | (0.00, | (-1.27, | <0.001 |
|                   |   |   |   |   |   |   |   |   | 8.74)  | 7.18)  | -0.33)  |        | 0.73)  | 0.71)  | -0.78)  |        |
|                   |   |   |   |   |   |   |   |   | 3.85   | 2.65   | -1.40   |        | 0.07   | 0.05   | -1.15   |        |
| France            | — | — | — | — | — | — | — | — | (3.50, | (2.35, | (-1.69, | <0.001 | (0.03, | (0.01, | (-2.26, | 0.044  |
|                   |   |   |   |   |   |   |   |   | 4.23)  | 2.98)  | -1.10)  |        | 0.14)  | 0.11)  | -0.03)  |        |
|                   |   |   |   |   |   |   |   |   | 6.58   | 5.04   | -0.97   |        | 0.12   | 0.09   | -0.94   |        |
| Gabon             | — | — | — | — | — | — | — | — | (3.18, | (3.00, | (-1.51, | <0.001 | (0.00, | (0.00, | (-1.30, | <0.001 |
|                   |   |   |   |   |   |   |   |   | 12.20) | 7.97)  | -0.43)  |        | 2.97)  | 1.28)  | -0.59)  |        |
|                   |   |   |   |   |   |   |   |   | 4.71   | 3.66   | -0.82   |        | 0.09   | 0.07   | -0.92   |        |
| Gambia            | — | — | — | — | — | — | — | — | (1.89, | (2.05, | (-2.07, | 0.206  | (0.00, | (0.00, | (-1.40, | <0.001 |
|                   |   |   |   |   |   |   |   |   | 9.88)  | 6.08)  | 0.45)   |        | 2.99)  | 1.13)  | -0.44)  |        |
|                   |   |   |   |   |   |   |   |   | 1.74   | 2.68   | 1.31    |        | 0.03   | 0.05   | 2.17    |        |
| Georgia           | — | — | — | — | — | — | — | — | (1.05, | (1.56, | (0.46,  | 0.003  | (0.00, | (0.00, | (0.14,  | 0.036  |

|               |   |   |   |   |   |   |   |   |        |         |         |        |        |        |         |        |
|---------------|---|---|---|---|---|---|---|---|--------|---------|---------|--------|--------|--------|---------|--------|
|               |   |   |   |   |   |   |   |   | 2.73)  | 4.41)   | 2.17)   |        | 0.45)  | 0.95)  | 4.24)   |        |
|               |   |   |   |   |   |   |   |   | 7.28   | 5.60    | -0.97   |        | 0.13   | 0.10   | -1.09   |        |
| Germany       | — | — | — | — | — | — | — | — | (6.86, | (5.20,  | (-1.36, | <0.001 | (0.08, | (0.05, | (-1.38, | <0.001 |
|               |   |   |   |   |   |   |   |   | 7.73)  | 6.03)   | -0.59)  |        | 0.20)  | 0.17)  | -0.81)  |        |
|               |   |   |   |   |   |   |   |   | 11.01  | 6.29    | -1.93   |        | 0.20   | 0.12   | -1.68   |        |
| Ghana         | — | — | — | — | — | — | — | — | (9.72, | (5.68,  | (-2.15, | <0.001 | (0.06, | (0.05, | (-2.07, | <0.001 |
|               |   |   |   |   |   |   |   |   | 12.43) | 6.93)   | -1.72)  |        | 0.49)  | 0.24)  | -1.29)  |        |
|               |   |   |   |   |   |   |   |   | 10.50  | 12.04   | 0.49    |        | 0.18   | 0.21   | 0.64    |        |
| Greece        | — | — | — | — | — | — | — | — | (9.09, | (10.38, | (0.02,  | 0.040  | (0.04, | (0.05, | (0.21,  | 0.003  |
|               |   |   |   |   |   |   |   |   | 12.07) | 13.92)  | 0.96)   |        | 0.51)  | 0.64)  | 1.08)   |        |
|               |   |   |   |   |   |   |   |   | 6.32   | 3.91    | -1.57   |        | 0.12   | 0.07   | -1.71   |        |
| Greenland     | — | — | — | — | — | — | — | — | (0.04, | (0.00,  | (-1.91, | <0.001 | (0.00, | (0.00, | (-2.29, | <0.001 |
|               |   |   |   |   |   |   |   |   | 56.96) | 51.66)  | -1.23)  |        | 47.04) | 45.00) | -1.12)  |        |
|               |   |   |   |   |   |   |   |   | 6.05   | 4.88    | -0.74   |        | 0.11   | 0.09   | -1.03   |        |
| Grenada       | — | — | — | — | — | — | — | — | (0.11, | (0.09,  | (-1.29, | 0.008  | (0.00, | (0.00, | (-1.56, | <0.001 |
|               |   |   |   |   |   |   |   |   | 38.90) | 30.92)  | -0.19)  |        | 28.30) | 22.28) | -0.51)  |        |
|               |   |   |   |   |   |   |   |   | 3.68   | 3.08    | -0.63   |        | 0.07   | 0.06   | -0.58   |        |
| Guam          | — | — | — | — | — | — | — | — | (0.10, | (0.04,  | (-1.29, | 0.059  | (0.00, | (0.00, | (-2.34, | 0.520  |
|               |   |   |   |   |   |   |   |   | 20.62) | 19.91)  | 0.02)   |        | 14.04) | 14.26) | 1.21)   |        |
|               |   |   |   |   |   |   |   |   | 3.52   | 3.61    | 0.12    |        | 0.06   | 0.06   | -0.02   |        |
| Guatemala     | — | — | — | — | — | — | — | — | (2.58, | (3.04,  | (-0.49, | 0.699  | (0.00, | (0.01, | (-2.08, | 0.986  |
|               |   |   |   |   |   |   |   |   | 4.70)  | 4.27)   | 0.73)   |        | 0.43)  | 0.21)  | 2.09)   |        |
|               |   |   |   |   |   |   |   |   | 5.91   | 3.69    | -1.60   |        | 0.11   | 0.07   | -1.62   |        |
| Guinea        | — | — | — | — | — | — | — | — | (4.51, | (2.94,  | (-1.73, | <0.001 | (0.00, | (0.00, | (-2.06, | <0.001 |
|               |   |   |   |   |   |   |   |   | 7.63)  | 4.58)   | -1.48)  |        | 0.59)  | 0.30)  | -1.17)  |        |
|               |   |   |   |   |   |   |   |   | 6.51   | 4.21    | -1.50   |        | 0.12   | 0.08   | -1.44   |        |
| Guinea-Bissau | — | — | — | — | — | — | — | — | (3.21, | (2.38,  | (-1.63, | <0.001 | (0.00, | (0.00, | (-1.74, | <0.001 |
|               |   |   |   |   |   |   |   |   | 11.82) | 6.95)   | -1.37)  |        | 2.65)  | 1.26)  | -1.14)  |        |
|               |   |   |   |   |   |   |   |   | 7.38   | 12.07   | 1.99    |        | 0.13   | 0.21   | 1.90    |        |
| Guyana        | — | — | — | — | — | — | — | — | (3.72, | (7.18,  | (1.29,  | <0.001 | (0.00, | (0.00, | (1.15,  | <0.001 |
|               |   |   |   |   |   |   |   |   | 13.31) | 19.09)  | 2.70)   |        | 3.06)  | 3.06)  | 2.65)   |        |
|               |   |   |   |   |   |   |   |   | 4.04   | 4.84    | 0.68    |        | 0.07   | 0.08   | 0.45    |        |
| Haiti         | — | — | — | — | — | — | — | — | (2.97, | (4.05,  | (0.30,  | <0.001 | (0.00, | (0.01, | (-0.50, | 0.356  |

|                               |   |   |   |   |   |   |   |   |        |        |         |        |        |        |         |        |
|-------------------------------|---|---|---|---|---|---|---|---|--------|--------|---------|--------|--------|--------|---------|--------|
|                               |   |   |   |   |   |   |   |   | 5.37)  | 5.73)  | 1.06)   |        | 0.47)  | 0.29)  | 1.41)   |        |
|                               |   |   |   |   |   |   |   |   | 2.19   | 1.45   | -1.48   |        | 0.04   | 0.03   | -0.86   |        |
| Honduras                      | — | — | — | — | — | — | — | — | (1.27, | (0.97, | (-1.86, | <0.001 | (0.00, | (0.00, | (-2.02, | 0.147  |
|                               |   |   |   |   |   |   |   |   | 3.55)  | 2.09)  | -1.10)  |        | 0.62)  | 0.25)  | 0.31)   |        |
|                               |   |   |   |   |   |   |   |   | 7.58   | 5.87   | -0.91   |        | 0.13   | 0.10   | -1.06   |        |
| Hungary                       | — | — | — | — | — | — | — | — | (6.41, | (4.72, | (-1.42, | <0.001 | (0.02, | (0.01, | (-1.51, | <0.001 |
|                               |   |   |   |   |   |   |   |   | 8.92)  | 7.25)  | -0.41)  |        | 0.45)  | 0.50)  | -0.61)  |        |
|                               |   |   |   |   |   |   |   |   | 9.37   | 6.82   | -1.08   |        | 0.16   | 0.12   | -1.00   |        |
| Iceland                       | — | — | — | — | — | — | — | — | (2.96, | (1.89, | (-1.42, | <0.001 | (0.00, | (0.00, | (-1.33, | <0.001 |
|                               |   |   |   |   |   |   |   |   | 22.56) | 18.12) | -0.74)  |        | 8.19)  | 7.78)  | -0.68)  |        |
|                               |   |   |   |   |   |   |   |   | 2.55   | 3.23   | 0.81    |        | 0.04   | 0.06   | 0.99    |        |
| India                         | — | — | — | — | — | — | — | — | (2.47, | (3.16, | (0.26,  | 0.004  | (0.03, | (0.05, | (0.28,  | 0.006  |
|                               |   |   |   |   |   |   |   |   | 2.63)  | 3.30)  | 1.37)   |        | 0.06)  | 0.07)  | 1.70)   |        |
|                               |   |   |   |   |   |   |   |   | 3.87   | 4.13   | 0.23    |        | 0.07   | 0.07   | 0.00    |        |
| Indonesia                     | — | — | — | — | — | — | — | — | (3.66, | (3.96, | (0.13,  | <0.001 | (0.04, | (0.05, | (0.00,  | <0.001 |
|                               |   |   |   |   |   |   |   |   | 4.08)  | 4.30)  | 0.33)   |        | 0.10)  | 0.10)  | 0.00)*  |        |
|                               |   |   |   |   |   |   |   |   | 2.63   | 3.74   | 1.19    |        | 0.04   | 0.06   | 0.80    |        |
| Iran (Islamic<br>Republic of) | — | — | — | — | — | — | — | — | (2.32, | (3.46, | (0.92,  | <0.001 | (0.01, | (0.03, | (-0.00, | 0.051  |
|                               |   |   |   |   |   |   |   |   | 2.97)  | 4.05)  | 1.45)   |        | 0.11)  | 0.12)  | 1.61)   |        |
|                               |   |   |   |   |   |   |   |   | 3.75   | 2.51   | -1.29   |        | 0.06   | 0.04   | -1.62   |        |
| Iraq                          | — | — | — | — | — | — | — | — | (3.10, | (2.19, | (-1.52, | <0.001 | (0.01, | (0.01, | (-2.08, | <0.001 |
|                               |   |   |   |   |   |   |   |   | 4.50)  | 2.86)  | -1.06)  |        | 0.25)  | 0.12)  | -1.16)  |        |
|                               |   |   |   |   |   |   |   |   | 5.57   | 4.23   | -0.98   |        | 0.10   | 0.07   | -1.29   |        |
| Ireland                       | — | — | — | — | — | — | — | — | (3.92, | (2.98, | (-1.52, | <0.001 | (0.00, | (0.00, | (-1.57, | <0.001 |
|                               |   |   |   |   |   |   |   |   | 7.69)  | 5.88)  | -0.44)  |        | 0.76)  | 0.66)  | -1.00)  |        |
|                               |   |   |   |   |   |   |   |   | 2.60   | 1.44   | -2.08   |        | 0.04   | 0.02   | -2.33   |        |
| Israel                        | — | — | — | — | — | — | — | — | (1.68, | (0.91, | (-2.39, | <0.001 | (0.00, | (0.00, | (-2.33, | <0.001 |
|                               |   |   |   |   |   |   |   |   | 3.85)  | 2.16)  | -1.77)  |        | 0.50)  | 0.29)  | -2.33)  |        |
|                               |   |   |   |   |   |   |   |   | 3.99   | 3.48   | -0.46   |        | 0.07   | 0.06   | -0.46   |        |
| Italy                         | — | — | — | — | — | — | — | — | (3.62, | (3.09, | (-0.86, | 0.022  | (0.03, | (0.02, | (-0.99, | 0.086  |
|                               |   |   |   |   |   |   |   |   | 4.39)  | 3.91)  | -0.07)  |        | 0.14)  | 0.15)  | 0.07)   |        |
|                               |   |   |   |   |   |   |   |   | 4.10   | 4.41   | 0.28    |        | 0.07   | 0.08   | 0.38    |        |
| Jamaica                       | — | — | — | — | — | — | — | — | (2.42, | (2.89, | (-0.31, | 0.346  | (0.00, | (0.00, | (-0.54, | 0.415  |

|              |   |   |   |   |   |   |   |   |        |        |         |        |        |        |         |        |
|--------------|---|---|---|---|---|---|---|---|--------|--------|---------|--------|--------|--------|---------|--------|
|              |   |   |   |   |   |   |   |   | 6.57)  | 6.47)  | 0.88)   |        | 1.14)  | 0.82)  | 1.31)   |        |
|              |   |   |   |   |   |   |   |   | 2.52   | 4.33   | 1.91    |        | 0.04   | 0.08   | 2.26    |        |
| Japan        | — | — | — | — | — | — | — | — | (2.31, | (4.03, | (1.69,  | <0.001 | (0.02, | (0.04, | (1.77,  | <0.001 |
|              |   |   |   |   |   |   |   |   | 2.73)  | 4.66)  | 2.14)   |        | 0.08)  | 0.13)  | 2.75)   |        |
|              |   |   |   |   |   |   |   |   | 5.86   | 4.56   | -0.81   |        | 0.09   | 0.07   | -0.89   |        |
| Jordan       | — | — | — | — | — | — | — | — | (4.20, | (3.73, | (-1.09, | <0.001 | (0.00, | (0.01, | (-1.30, | <0.001 |
|              |   |   |   |   |   |   |   |   | 8.07)  | 5.53)  | -0.54)  |        | 0.97)  | 0.31)  | -0.48)  |        |
|              |   |   |   |   |   |   |   |   | 5.94   | 8.26   | 1.09    |        | 0.10   | 0.15   | 1.30    |        |
| Kazakhstan   | — | — | — | — | — | — | — | — | (5.15, | (7.36, | (0.80,  | <0.001 | (0.03, | (0.05, | (0.71,  | <0.001 |
|              |   |   |   |   |   |   |   |   | 6.83)  | 9.25)  | 1.38)   |        | 0.29)  | 0.35)  | 1.89)   |        |
|              |   |   |   |   |   |   |   |   | 6.11   | 5.24   | -0.57   |        | 0.11   | 0.09   | -0.76   |        |
| Kenya        | — | — | — | — | — | — | — | — | (5.32, | (4.80, | (-0.70, | <0.001 | (0.03, | (0.04, | (-1.16, | <0.001 |
|              |   |   |   |   |   |   |   |   | 6.99)  | 5.72)  | -0.45)  |        | 0.30)  | 0.18)  | -0.36)  |        |
|              |   |   |   |   |   |   |   |   | 3.36   | 4.12   | 0.68    |        | 0.06   | 0.07   | 0.77    |        |
| Kiribati     | — | — | — | — | — | — | — | — | (0.00, | (0.10, | (0.50,  | <0.001 | (0.00, | (0.00, | (-0.91, | 0.371  |
|              |   |   |   |   |   |   |   |   | 35.70) | 23.70) | 0.85)   |        | 29.62) | 16.26) | 2.49)   |        |
|              |   |   |   |   |   |   |   |   | 2.88   | 2.10   | -1.04   |        | 0.05   | 0.03   | -1.67   |        |
| Kuwait       | — | — | — | — | — | — | — | — | (1.39, | (1.24, | (-2.84, | 0.262  | (0.00, | (0.00, | (-3.10, | 0.025  |
|              |   |   |   |   |   |   |   |   | 5.33)  | 3.46)  | 0.79)   |        | 1.29)  | 0.76)  | -0.21)  |        |
|              |   |   |   |   |   |   |   |   | 2.67   | 2.35   | -0.39   |        | 0.05   | 0.04   | -0.60   |        |
| Kyrgyzstan   | — | — | — | — | — | — | — | — | (1.70, | (1.60, | (-1.11, | 0.297  | (0.00, | (0.00, | (-2.08, | 0.429  |
|              |   |   |   |   |   |   |   |   | 4.02)  | 3.34)  | 0.34)   |        | 0.58)  | 0.39)  | 0.90)   |        |
| Lao People's |   |   |   |   |   |   |   |   | 1.86   | 4.25   | 2.91    |        | 0.03   | 0.07   | 2.96    |        |
| Democratic   | — | — | — | — | — | — | — | — | (0.98, | (3.26, | (2.73,  | <0.001 | (0.00, | (0.00, | (2.39,  | <0.001 |
| Republic     |   |   |   |   |   |   |   |   | 3.23)  | 5.44)  | 3.10)   |        | 0.68)  | 0.41)  | 3.54)   |        |
|              |   |   |   |   |   |   |   |   | 5.78   | 4.60   | -0.74   |        | 0.10   | 0.08   | -0.86   |        |
| Latvia       | — | — | — | — | — | — | — | — | (3.89, | (2.58, | (-1.21, | 0.002  | (0.00, | (0.00, | (-1.83, | 0.082  |
|              |   |   |   |   |   |   |   |   | 8.34)  | 7.92)  | -0.27)  |        | 1.09)  | 2.00)  | 0.11)   |        |
|              |   |   |   |   |   |   |   |   | 4.23   | 3.69   | -0.47   |        | 0.07   | 0.06   | -0.51   |        |
| Lebanon      | — | — | — | — | — | — | — | — | (2.72, | (2.60, | (-0.57, | <0.001 | (0.00, | (0.00, | (-0.51, | <0.001 |
|              |   |   |   |   |   |   |   |   | 6.30)  | 5.12)  | -0.37)  |        | 0.84)  | 0.60)  | -0.51)  |        |
|              |   |   |   |   |   |   |   |   | 7.61   | 5.67   | -1.01   |        | 0.13   | 0.10   | -0.96   |        |
| Lesotho      | — | — | — | — | — | — | — | — | (4.81, | (3.67, | (-1.32, | <0.001 | (0.00, | (0.00, | (-1.43, | <0.001 |

|                  |   |   |   |   |   |   |   |   |         |         |         |         |        |        |         |         |  |
|------------------|---|---|---|---|---|---|---|---|---------|---------|---------|---------|--------|--------|---------|---------|--|
|                  |   |   |   |   |   |   |   |   |         | 11.54)  | 8.39)   | (-0.70) |        | 1.70)  | 1.10)   | (-0.48) |  |
|                  |   |   |   |   |   |   |   |   |         | 5.20)   | 3.46)   | (-1.43) |        | 0.09)  | 0.06)   | (-1.37) |  |
| Liberia          | — | — | — | — | — | — | — | — | (3.03,  | (2.36,  | (-1.68, | <0.001  | (0.00, | (0.00, | (-1.70, | <0.001  |  |
|                  |   |   |   |   |   |   |   |   | 8.33)   | 4.91)   | (-1.17) |         | 1.35)  | 0.55)  | (-1.04) |         |  |
|                  |   |   |   |   |   |   |   |   | 3.69)   | 4.27)   | 0.50)   |         | 0.06)  | 0.07)  | 0.52)   |         |  |
| Libya            | — | — | — | — | — | — | — | — | (2.38,  | (3.28,  | (0.36,  | <0.001  | (0.00, | (0.00, | (0.52,  | <0.001  |  |
|                  |   |   |   |   |   |   |   |   | 5.54)   | 5.48)   | 0.65)   |         | 0.86)  | 0.41)  | 0.52)   |         |  |
|                  |   |   |   |   |   |   |   |   | 5.70)   | 6.55)   | 0.45)   |         | 0.10)  | 0.12)  | 0.51)   |         |  |
| Lithuania        | — | — | — | — | — | — | — | — | (4.09,  | (4.39,  | (0.00,  | 0.049   | (0.00, | (0.00, | (0.19,  | 0.002   |  |
|                  |   |   |   |   |   |   |   |   | 7.77)   | 9.55)   | 0.90)   |         | 0.77)  | 1.39)  | 0.84)   |         |  |
|                  |   |   |   |   |   |   |   |   | 5.69)   | 3.93)   | (-1.26) |         | 0.10)  | 0.07)  | (-1.15) |         |  |
| Luxembourg       | — | — | — | — | — | — | — | — | (1.67,  | (1.15,  | (-1.46, | <0.001  | (0.00, | (0.00, | (-1.56, | <0.001  |  |
|                  |   |   |   |   |   |   |   |   | 15.69)  | 10.67)  | (-1.07) |         | 7.67)  | 5.05)  | (-0.73) |         |  |
|                  |   |   |   |   |   |   |   |   | 19.61)  | 12.19)  | (-1.66) |         | 0.34)  | 0.21)  | (-1.67) |         |  |
| Madagascar       | — | — | — | — | — | — | — | — | (17.70, | (11.23, | (-1.86, | <0.001  | (0.13, | (0.10, | (-2.27, | <0.001  |  |
|                  |   |   |   |   |   |   |   |   | 21.68)  | 13.21)  | (-1.45) |         | 0.74)  | 0.39)  | (-1.08) |         |  |
|                  |   |   |   |   |   |   |   |   | 6.53)   | 4.99)   | (-0.93) |         | 0.11)  | 0.09)  | (-0.60) |         |  |
| Malawi           | — | — | — | — | — | — | — | — | (5.33,  | (4.27,  | (-1.12, | <0.001  | (0.01, | (0.02, | (-1.09, | 0.016   |  |
|                  |   |   |   |   |   |   |   |   | 7.94)   | 5.80)   | (-0.75) |         | 0.47)  | 0.27)  | (-0.11) |         |  |
|                  |   |   |   |   |   |   |   |   | 5.21)   | 4.76)   | (-0.33) |         | 0.09)  | 0.08)  | (-0.50) |         |  |
| Malaysia         | — | — | — | — | — | — | — | — | (4.48,  | (4.24,  | (-0.71, | 0.090   | (0.02, | (0.03, | (-1.26, | 0.199   |  |
|                  |   |   |   |   |   |   |   |   | 6.02)   | 5.32)   | 0.05)   |         | 0.26)  | 0.19)  | 0.27)   |         |  |
|                  |   |   |   |   |   |   |   |   | 2.52)   | 1.84)   | (-0.95) |         | 0.04)  | 0.03)  | (-1.00) |         |  |
| Maldives         | — | — | — | — | — | — | — | — | (0.03,  | (0.17,  | (-1.13, | <0.001  | (0.00, | (0.00, | (-1.00, | <0.001  |  |
|                  |   |   |   |   |   |   |   |   | 19.55)  | 8.62)   | (-0.76) |         | 15.55) | 5.85)  | (-1.00) |         |  |
|                  |   |   |   |   |   |   |   |   | 8.65)   | 4.89)   | (-1.94) |         | 0.16)  | 0.09)  | (-1.87) |         |  |
| Mali             | — | — | — | — | — | — | — | — | (7.13,  | (4.17,  | (-2.23, | <0.001  | (0.02, | (0.02, | (-2.49, | <0.001  |  |
|                  |   |   |   |   |   |   |   |   | 10.40)  | 5.70)   | (-1.66) |         | 0.57)  | 0.27)  | (-1.24) |         |  |
|                  |   |   |   |   |   |   |   |   | 2.48)   | 2.53)   | 0.03)   |         | 0.04)  | 0.04)  | 0.07)   |         |  |
| Malta            | — | — | — | — | — | — | — | — | (0.24,  | (0.25,  | (-0.35, | 0.891   | (0.00, | (0.00, | (-0.19, | 0.596   |  |
|                  |   |   |   |   |   |   |   |   | 10.57)  | 11.79)  | 0.40)   |         | 6.57)  | 8.05)  | 0.33)   |         |  |
|                  |   |   |   |   |   |   |   |   | 5.19)   | 5.83)   | 0.41)   |         | 0.10)  | 0.11)  | 0.61)   |         |  |
| Marshall Islands | — | — | — | — | — | — | — | — | (0.00,  | (0.03,  | (0.35,  | <0.001  | (0.00, | (0.00, | (0.27,  | <0.001  |  |



|                   |   |   |   |   |   |   |   |   |         |         |         |        |         |        |         |        |  |
|-------------------|---|---|---|---|---|---|---|---|---------|---------|---------|--------|---------|--------|---------|--------|--|
|                   |   |   |   |   |   |   |   |   | 66.80)  | 44.54)  | 0.48)   |        | 57.03)  | 33.68) | 0.95)   |        |  |
|                   |   |   |   |   |   |   |   |   | 5.24    | 3.30    | -1.57   |        | 0.10    | 0.06   | -1.61   |        |  |
| Mauritania        | — | — | — | — | — | — | — | — | (3.08,  | (2.10,  | (-1.83, | <0.001 | (0.00,  | (0.00, | (-2.11, | <0.001 |  |
|                   |   |   |   |   |   |   |   |   | 8.38)   | 4.96)   | -1.31)  |        | 1.38)   | 0.69)  | -1.10)  |        |  |
|                   |   |   |   |   |   |   |   |   | 6.68    | 5.59    | -0.76   |        | 0.12    | 0.10   | -0.83   |        |  |
| Mauritius         | — | — | — | — | — | — | — | — | (3.82,  | (3.03,  | (-1.57, | 0.067  | (0.00,  | (0.00, | (-1.99, | 0.167  |  |
|                   |   |   |   |   |   |   |   |   | 10.89)  | 9.55)   | 0.05)   |        | 1.86)   | 1.94)  | 0.35)   |        |  |
|                   |   |   |   |   |   |   |   |   | 3.22    | 2.57    | -0.77   |        | 0.06    | 0.04   | -1.30   |        |  |
| Mexico            | — | — | — | — | — | — | — | — | (2.95,  | (2.38,  | (-1.32, | 0.006  | (0.03,  | (0.02, | (-1.30, | <0.001 |  |
|                   |   |   |   |   |   |   |   |   | 3.51)   | 2.78)   | -0.22)  |        | 0.11)   | 0.08)  | -1.30)  |        |  |
| Micronesia        |   |   |   |   |   |   |   |   | 4.39    | 5.31    | 0.65    |        | 0.08    | 0.10   | 0.87    |        |  |
| (Federated States | — | — | — | — | — | — | — | — | (0.03,  | (0.11,  | (0.57,  | <0.001 | (0.00,  | (0.00, | (0.32,  | 0.002  |  |
| of)               |   |   |   |   |   |   |   |   | 32.56)  | 31.57)  | 0.74)   |        | 24.63)  | 21.99) | 1.41)   |        |  |
|                   |   |   |   |   |   |   |   |   | 17.36   | 13.86   | -0.76   |        | 0.30    | 0.24   | -0.81   |        |  |
| Monaco            | — | — | — | — | — | — | — | — | (0.26,  | (0.08,  | (-0.85, | <0.001 | (0.00,  | (0.00, | (-0.92, | <0.001 |  |
|                   |   |   |   |   |   |   |   |   | 151.05) | 115.37) | -0.67)  |        | 126.35) | 91.56) | -0.70)  |        |  |
|                   |   |   |   |   |   |   |   |   | 2.66    | 2.54    | -0.14   |        | 0.05    | 0.04   | -0.74   |        |  |
| Mongolia          | — | — | — | — | — | — | — | — | (1.25,  | (1.51,  | (-0.32, | 0.124  | (0.00,  | (0.00, | (-0.74, | <0.001 |  |
|                   |   |   |   |   |   |   |   |   | 5.09)   | 4.11)   | 0.04)   |        | 1.38)   | 0.82)  | -0.74)  |        |  |
|                   |   |   |   |   |   |   |   |   | 26.86   | 27.27   | 0.15    |        | 0.47    | 0.47   | 0.16    |        |  |
| Montenegro        | — | — | — | — | — | — | — | — | (18.47, | (18.34, | (-0.43, | 0.621  | (0.00,  | (0.00, | (-0.36, | 0.544  |  |
|                   |   |   |   |   |   |   |   |   | 37.79)  | 39.31)  | 0.73)   |        | 4.03)   | 4.96)  | 0.69)   |        |  |
|                   |   |   |   |   |   |   |   |   | 2.27    | 2.49    | 0.32    |        | 0.04    | 0.04   | 0.00    |        |  |
| Morocco           | — | — | — | — | — | — | — | — | (1.87,  | (2.15,  | (0.16,  | <0.001 | (0.00,  | (0.01, | (0.00,  | <0.001 |  |
|                   |   |   |   |   |   |   |   |   | 2.74)   | 2.88)   | 0.49)   |        | 0.15)   | 0.12)  | 0.00)*  |        |  |
|                   |   |   |   |   |   |   |   |   | 4.70    | 4.32    | -0.30   |        | 0.08    | 0.08   | 0.12    |        |  |
| Mozambique        | — | — | — | — | — | — | — | — | (3.85,  | (3.76,  | (-0.48, | 0.001  | (0.01,  | (0.02, | (-0.73, | 0.776  |  |
|                   |   |   |   |   |   |   |   |   | 5.70)   | 4.94)   | -0.12)  |        | 0.32)   | 0.21)  | 0.98)   |        |  |
|                   |   |   |   |   |   |   |   |   | 3.86    | 4.55    | 0.57    |        | 0.07    | 0.08   | 0.54    |        |  |
| Myanmar           | — | — | — | — | — | — | — | — | (3.43,  | (4.17,  | (0.38,  | <0.001 | (0.02,  | (0.04, | (-0.29, | 0.201  |  |
|                   |   |   |   |   |   |   |   |   | 4.32)   | 4.96)   | 0.76)   |        | 0.16)   | 0.15)  | 1.38)   |        |  |
|                   |   |   |   |   |   |   |   |   | 9.67    | 6.48    | -1.42   |        | 0.17    | 0.11   | -1.40   |        |  |
| Namibia           | — | — | — | — | — | — | — | — | (6.12,  | (4.43,  | (-1.72, | <0.001 | (0.00,  | (0.00, | (-2.28, | 0.002  |  |

|                          |   |   |   |   |   |   |   |   |          |          |         |        |         |         |         |        |
|--------------------------|---|---|---|---|---|---|---|---|----------|----------|---------|--------|---------|---------|---------|--------|
|                          |   |   |   |   |   |   |   |   | 14.63)   | 9.17)    | -1.13)  |        | 2.16)   | 1.04)   | -0.52)  |        |
|                          |   |   |   |   |   |   |   |   | 5.84     | 5.93     | 0.06    |        | 0.11    | 0.11    | -0.07   |        |
| Nauru                    | — | — | — | — | — | — | — | — | (0.00,   | (0.00,   | (-0.04, | 0.259  | (0.00,  | (0.00,  | (-0.44, | 0.717  |
|                          |   |   |   |   |   |   |   |   | 218.87)  | 197.68)  | 0.15)   |        | 207.39) | 186.08) | 0.30)   |        |
|                          |   |   |   |   |   |   |   |   | 1.63     | 2.28     | 1.18    |        | 0.03    | 0.04    | 0.97    |        |
| Nepal                    | — | — | — | — | — | — | — | — | (1.23,   | (1.93,   | (1.03,  | <0.001 | (0.00,  | (0.01,  | (0.97,  | <0.001 |
|                          |   |   |   |   |   |   |   |   | 2.14)    | 2.68)    | 1.32)   |        | 0.18)   | 0.13)   | 0.97)   |        |
|                          |   |   |   |   |   |   |   |   | 5.41     | 3.69     | -1.28   |        | 0.09    | 0.06    | -1.31   |        |
| Netherlands              | — | — | — | — | — | — | — | — | (4.61,   | (2.99,   | (-1.55, | <0.001 | (0.02,  | (0.01,  | (-1.97, | <0.001 |
|                          |   |   |   |   |   |   |   |   | 6.32)    | 4.50)    | -1.01)  |        | 0.30)   | 0.27)   | -0.65)  |        |
|                          |   |   |   |   |   |   |   |   | 5.65     | 3.48     | -1.72   |        | 0.10    | 0.06    | -1.87   |        |
| New Zealand              | — | — | — | — | — | — | — | — | (4.03,   | (2.28,   | (-2.01, | <0.001 | (0.00,  | (0.00,  | (-2.61, | <0.001 |
|                          |   |   |   |   |   |   |   |   | 7.71)    | 5.12)    | -1.43)  |        | 0.75)   | 0.68)   | -1.11)  |        |
|                          |   |   |   |   |   |   |   |   | 2.54     | 2.28     | -0.56   |        | 0.04    | 0.04    | 0.14    |        |
| Nicaragua                | — | — | — | — | — | — | — | — | (1.48,   | (1.55,   | (-1.48, | 0.228  | (0.00,  | (0.00,  | (-0.12, | 0.276  |
|                          |   |   |   |   |   |   |   |   | 4.13)    | 3.23)    | 0.36)   |        | 0.76)   | 0.36)   | 0.41)   |        |
|                          |   |   |   |   |   |   |   |   | 5.21     | 3.04     | -1.85   |        | 0.10    | 0.05    | -2.18   |        |
| Niger                    | — | — | — | — | — | — | — | — | (3.95,   | (2.46,   | (-1.96, | <0.001 | (0.00,  | (0.00,  | (-2.71, | <0.001 |
|                          |   |   |   |   |   |   |   |   | 6.77)    | 3.73)    | -1.73)  |        | 0.55)   | 0.23)   | -1.66)  |        |
|                          |   |   |   |   |   |   |   |   | 6.66     | 3.07     | -2.67   |        | 0.12    | 0.06    | -2.27   |        |
| Nigeria                  | — | — | — | — | — | — | — | — | (6.22,   | (2.89,   | (-2.90, | <0.001 | (0.07,  | (0.03,  | (-2.93, | <0.001 |
|                          |   |   |   |   |   |   |   |   | 7.13)    | 3.25)    | -2.43)  |        | 0.20)   | 0.09)   | -1.60)  |        |
|                          |   |   |   |   |   |   |   |   |          |          |         |        | 0.10    | 0.09    | -0.43   |        |
| Niue                     | — | — | — | — | — | — | — | — | (0.00,   | (0.00,   | (-0.74, | <0.001 | (0.00,  | (0.00,  | (-0.43, | <0.001 |
|                          |   |   |   |   |   |   |   |   | 1051.73) | 1471.03) | -0.51)  |        | 1039.98 | 1461.65 | -0.43)  |        |
|                          |   |   |   |   |   |   |   |   |          |          |         |        | )       | )       |         |        |
|                          |   |   |   |   |   |   |   |   | 5.15     | 6.41     | 0.75    |        | 0.09    | 0.11    | 0.75    |        |
| North Macedonia          | — | — | — | — | — | — | — | — | (3.17,   | (4.17,   | (-0.07, | 0.074  | (0.00,  | (0.00,  | (0.15,  | 0.014  |
|                          |   |   |   |   |   |   |   |   | 7.93)    | 9.62)    | 1.58)   |        | 1.14)   | 1.54)   | 1.35)   |        |
|                          |   |   |   |   |   |   |   |   | 13.48    | 2.93     | -5.07   |        | 0.25    | 0.05    | -6.06   |        |
| Northern Mariana Islands | — | — | — | — | — | — | — | — | (1.02,   | (0.00,   | (-5.55, | <0.001 | (0.00,  | (0.00,  | (-6.74, | <0.001 |
|                          |   |   |   |   |   |   |   |   | 60.14)   | 104.29)  | -4.59)  |        | 37.48)  | 98.77)  | -5.39)  |        |
|                          |   |   |   |   |   |   |   |   | 5.25     | 2.81     | -2.19   | <0.001 | 0.09    | 0.05    | -2.01   | <0.001 |
| Norway                   | — | — | — | — | — | — | — | — |          |          |         |        |         |         |         |        |

|                  |   |   |   |   |   |   |   |   |   |                   |                   |                   |        |                   |                   |                   |        |
|------------------|---|---|---|---|---|---|---|---|---|-------------------|-------------------|-------------------|--------|-------------------|-------------------|-------------------|--------|
|                  |   |   |   |   |   |   |   |   |   | (3.79,<br>7.12)   | (1.83,<br>4.18)   | (-2.51,<br>-1.88) |        | (0.00,<br>0.69)   | (0.00,<br>0.61)   | (-2.65,<br>-1.37) |        |
|                  |   |   |   |   |   |   |   |   |   | 4.32              | 5.26              | 0.70              |        | 0.07              | 0.09              | 0.82              |        |
| Oman             | — | — | — | — | — | — | — | — | — | (2.23,<br>7.68)   | (3.78,<br>7.19)   | (0.13,<br>1.27)   | 0.016  | (0.00,<br>1.72)   | (0.00,<br>0.78)   | (0.22,<br>1.42)   | 0.007  |
|                  |   |   |   |   |   |   |   |   |   | 2.58              | 3.96              | 1.49              |        | 0.05              | 0.07              | 1.15              |        |
| Pakistan         | — | — | — | — | — | — | — | — | — | (2.34,<br>2.84)   | (3.77,<br>4.16)   | (1.36,<br>1.61)   | <0.001 | (0.02,<br>0.09)   | (0.05,<br>0.10)   | (1.15,<br>1.15)   | <0.001 |
|                  |   |   |   |   |   |   |   |   |   | 1.38              | 1.32              | -0.18             |        | 0.02              | 0.02              | 0.43              |        |
| Palau            | — | — | — | — | — | — | — | — | — | (0.00,<br>123.56) | (0.00,<br>172.62) | (-0.28,<br>-0.09) | <0.001 | (0.00,<br>120.86) | (0.00,<br>170.25) | (0.43,<br>0.43)   | <0.001 |
|                  |   |   |   |   |   |   |   |   |   | 1.92              | 2.55              | 1.03              |        | 0.03              | 0.04              | 1.11              |        |
| Palestine        | — | — | — | — | — | — | — | — | — | (0.72,<br>4.34)   | (1.64,<br>3.81)   | (0.79,<br>1.26)   | <0.001 | (0.00,<br>1.58)   | (0.00,<br>0.55)   | (-0.88,<br>3.13)  | 0.277  |
|                  |   |   |   |   |   |   |   |   |   | 6.41              | 5.21              | -0.72             |        | 0.11              | 0.09              | -0.65             |        |
| Panama           | — | — | — | — | — | — | — | — | — | (4.29,<br>9.24)   | (3.73,<br>7.08)   | (-1.26,<br>-0.16) | 0.011  | (0.00,<br>1.13)   | (0.00,<br>0.66)   | (-1.53,<br>0.24)  | 0.150  |
|                  |   |   |   |   |   |   |   |   |   | 2.40              | 2.66              | 0.37              |        | 0.04              | 0.05              | 0.40              |        |
| Papua New Guinea | — | — | — | — | — | — | — | — | — | (1.37,<br>3.92)   | (1.97,<br>3.51)   | (0.21,<br>0.52)   | <0.001 | (0.00,<br>0.70)   | (0.00,<br>0.30)   | (0.04,<br>0.75)   | 0.030  |
|                  |   |   |   |   |   |   |   |   |   | 4.48              | 3.83              | -0.54             |        | 0.08              | 0.07              | -0.52             |        |
| Paraguay         | — | — | — | — | — | — | — | — | — | (3.06,<br>6.35)   | (2.88,<br>4.99)   | (-0.86,<br>-0.23) | 0.001  | (0.00,<br>0.73)   | (0.00,<br>0.40)   | (-0.52,<br>-0.52) | <0.001 |
|                  |   |   |   |   |   |   |   |   |   | 4.61              | 4.26              | -0.23             |        | 0.08              | 0.07              | -0.41             |        |
| Peru             | — | — | — | — | — | — | — | — | — | (3.99,<br>5.31)   | (3.78,<br>4.78)   | (-0.49,<br>0.04)  | 0.094  | (0.02,<br>0.23)   | (0.02,<br>0.17)   | (-1.12,<br>0.30)  | 0.257  |
|                  |   |   |   |   |   |   |   |   |   | 1.65              | 7.56              | 5.44              |        | 0.03              | 0.13              | 5.23              |        |
| Philippines      | — | — | — | — | — | — | — | — | — | (1.42,<br>1.91)   | (7.20,<br>7.94)   | (4.98,<br>5.90)   | <0.001 | (0.01,<br>0.08)   | (0.09,<br>0.19)   | (4.52,<br>5.94)   | <0.001 |
|                  |   |   |   |   |   |   |   |   |   | 5.44              | 5.62              | 0.09              |        | 0.09              | 0.10              | 0.09              |        |
| Poland           | — | — | — | — | — | — | — | — | — | (4.93,<br>6.00)   | (5.07,<br>6.23)   | (-0.25,<br>0.44)  | 0.599  | (0.04,<br>0.20)   | (0.04,<br>0.23)   | (-0.37,<br>0.56)  | 0.693  |
|                  |   |   |   |   |   |   |   |   |   | 5.68              | 4.17              | -0.99             |        | 0.10              | 0.07              | -1.19             | <0.001 |
| Portugal         | — | — | — | — | — | — | — | — | — |                   |                   |                   |        |                   |                   |                   |        |

|                                     |   |   |   |   |   |   |   |   |        |        |         |        |        |        |         |        |
|-------------------------------------|---|---|---|---|---|---|---|---|--------|--------|---------|--------|--------|--------|---------|--------|
|                                     |   |   |   |   |   |   |   |   | (4.66, | (3.24, | (-1.59, |        | (0.01, | (0.00, | (-1.50, |        |
|                                     |   |   |   |   |   |   |   |   | 6.87)  | 5.30)  | -0.39)  |        | 0.37)  | 0.41)  | -0.88)  |        |
|                                     |   |   |   |   |   |   |   |   | 3.80   | 2.67   | -1.23   |        | 0.07   | 0.05   | -1.00   |        |
| Puerto Rico                         | — | — | — | — | — | — | — | — | (2.51, | (1.53, | (-1.72, | <0.001 | (0.00, | (0.00, | (-2.06, | 0.070  |
|                                     |   |   |   |   |   |   |   |   | 5.51)  | 4.38)  | -0.74)  |        | 0.64)  | 0.80)  | 0.08)   |        |
|                                     |   |   |   |   |   |   |   |   | 1.98   | 1.61   | -0.71   |        | 0.03   | 0.03   | 0.31    |        |
| Qatar                               | — | — | — | — | — | — | — | — | (0.11, | (0.57, | (-0.96, | <0.001 | (0.00, | (0.00, | (0.31,  | <0.001 |
|                                     |   |   |   |   |   |   |   |   | 10.28) | 4.09)  | -0.46)  |        | 7.10)  | 1.94)  | 0.31)   |        |
|                                     |   |   |   |   |   |   |   |   | 3.17   | 2.25   | -1.17   |        | 0.06   | 0.04   | -1.29   |        |
| Republic of Korea                   | — | — | — | — | — | — | — | — | (2.83, | (1.95, | (-1.45, | <0.001 | (0.02, | (0.01, | (-1.29, | <0.001 |
|                                     |   |   |   |   |   |   |   |   | 3.54)  | 2.60)  | -0.89)  |        | 0.13)  | 0.12)  | -1.29)  |        |
|                                     |   |   |   |   |   |   |   |   | 3.26   | 5.09   | 1.36    |        | 0.06   | 0.09   | 1.10    |        |
| Republic of<br>Moldova              | — | — | — | — | — | — | — | — | (2.21, | (3.58, | (0.24,  | 0.017  | (0.00, | (0.00, | (-0.13, | 0.078  |
|                                     |   |   |   |   |   |   |   |   | 4.68)  | 7.16)  | 2.48)   |        | 0.60)  | 0.98)  | 2.35)   |        |
|                                     |   |   |   |   |   |   |   |   | 7.71   | 10.54  | 1.13    |        | 0.13   | 0.18   | 1.22    |        |
| Romania                             | — | — | — | — | — | — | — | — | (6.90, | (9.37, | (0.68,  | <0.001 | (0.05, | (0.06, | (1.09,  | <0.001 |
|                                     |   |   |   |   |   |   |   |   | 8.59)  | 11.83) | 1.58)   |        | 0.31)  | 0.43)  | 1.35)   |        |
|                                     |   |   |   |   |   |   |   |   | 7.05   | 9.51   | 1.03    |        | 0.12   | 0.17   | 1.22    |        |
| Russian Federation                  | — | — | — | — | — | — | — | — | (6.75, | (9.14, | (0.36,  | 0.003  | (0.09, | (0.12, | (0.49,  | 0.001  |
|                                     |   |   |   |   |   |   |   |   | 7.35)  | 9.90)  | 1.71)   |        | 0.17)  | 0.23)  | 1.95)   |        |
|                                     |   |   |   |   |   |   |   |   | 9.37   | 6.24   | -1.44   |        | 0.16   | 0.11   | -1.30   |        |
| Rwanda                              | — | — | — | — | — | — | — | — | (7.74, | (5.30, | (-1.73, | <0.001 | (0.02, | (0.02, | (-1.53, | <0.001 |
|                                     |   |   |   |   |   |   |   |   | 11.27) | 7.29)  | -1.16)  |        | 0.63)  | 0.34)  | -1.06)  |        |
|                                     |   |   |   |   |   |   |   |   | 4.75   | 2.23   | -2.65   |        | 0.08   | 0.04   | -2.55   |        |
| Saint Kitts and<br>Nevis            | — | — | — | — | — | — | — | — | (0.00, | (0.00, | (-3.58, | <0.001 | (0.00, | (0.00, | (-3.33, | <0.001 |
|                                     |   |   |   |   |   |   |   |   | 59.42) | 40.45) | -1.72)  |        | 50.70) | 36.42) | -1.76)  |        |
|                                     |   |   |   |   |   |   |   |   | 11.00  | 9.51   | -0.57   |        | 0.20   | 0.17   | -0.49   |        |
| Saint Lucia                         | — | — | — | — | — | — | — | — | (1.95, | (2.19, | (-1.27, | 0.110  | (0.00, | (0.00, | (-0.91, | 0.025  |
|                                     |   |   |   |   |   |   |   |   | 36.04) | 27.46) | 0.13)   |        | 18.51) | 12.56) | -0.06)  |        |
|                                     |   |   |   |   |   |   |   |   | 4.98   | 5.46   | 0.40    |        | 0.09   | 0.10   | 0.35    |        |
| Saint Vincent and<br>the Grenadines | — | — | — | — | — | — | — | — | (0.11, | (0.20, | (-0.29, | 0.257  | (0.00, | (0.00, | (-0.45, | 0.390  |
|                                     |   |   |   |   |   |   |   |   | 32.30) | 28.31) | 1.11)   |        | 23.99) | 18.53) | 1.15)   |        |
|                                     |   |   |   |   |   |   |   |   | 5.70   | 5.23   | -0.31   | <0.001 | 0.10   | 0.10   | -0.00   | <0.001 |
| Samoa                               | — | — | — | — | — | — | — | — |        |        |         |        |        |        |         |        |

|                       |   |   |   |   |   |   |   |   |        |        |         |        |        |        |         |        |
|-----------------------|---|---|---|---|---|---|---|---|--------|--------|---------|--------|--------|--------|---------|--------|
|                       |   |   |   |   |   |   |   |   | (0.32, | (0.53, | (-0.40, |        | (0.00, | (0.00, | (-0.00, |        |
|                       |   |   |   |   |   |   |   |   | 27.19) | 20.67) | -0.22)  |        | 17.32) | 11.77) | -0.00)* |        |
|                       |   |   |   |   |   |   |   |   | 1.62   | 1.67   | 0.09    |        | 0.03   | 0.03   | 0.00    |        |
| San Marino            | — | — | — | — | — | — | — | — | (0.00, | (0.00, | (-0.04, | 0.187  | (0.00, | (0.00, | (0.00,  | <0.001 |
|                       |   |   |   |   |   |   |   |   | 96.45) | 82.01) | 0.22)   |        | 93.35) | 79.01) | 0.00)*  |        |
|                       |   |   |   |   |   |   |   |   | 6.42   | 4.99   | -0.78   |        | 0.12   | 0.09   | -0.83   |        |
| Sao Tome and Principe | — | — | — | — | — | — | — | — | (0.17, | (0.58, | (-1.98, | 0.212  | (0.00, | (0.00, | (-1.81, | 0.104  |
|                       |   |   |   |   |   |   |   |   | 36.86) | 18.72) | 0.44)   |        | 25.55) | 10.24) | 0.17)   |        |
|                       |   |   |   |   |   |   |   |   | 2.07   | 1.32   | -1.62   |        | 0.04   | 0.02   | -2.32   |        |
| Saudi Arabia          | — | — | — | — | — | — | — | — | (1.54, | (1.08, | (-1.91, | <0.001 | (0.00, | (0.00, | (-2.32, | <0.001 |
|                       |   |   |   |   |   |   |   |   | 2.73)  | 1.61)  | -1.33)  |        | 0.24)  | 0.10)  | -2.32)  |        |
|                       |   |   |   |   |   |   |   |   | 4.64   | 3.09   | -1.40   |        | 0.08   | 0.05   | -1.96   |        |
| Senegal               | — | — | — | — | — | — | — | — | (3.47, | (2.46, | (-1.68, | <0.001 | (0.00, | (0.00, | (-3.31, | 0.005  |
|                       |   |   |   |   |   |   |   |   | 6.09)  | 3.84)  | -1.11)  |        | 0.52)  | 0.25)  | -0.59)  |        |
|                       |   |   |   |   |   |   |   |   | 6.32   | 6.78   | 0.26    |        | 0.11   | 0.12   | 0.28    |        |
| Serbia                | — | — | — | — | — | — | — | — | (5.19, | (5.51, | (0.06,  | 0.011  | (0.01, | (0.01, | (-0.38, | 0.408  |
|                       |   |   |   |   |   |   |   |   | 7.63)  | 8.27)  | 0.47)   |        | 0.43)  | 0.51)  | 0.95)   |        |
|                       |   |   |   |   |   |   |   |   | 6.38   | 6.40   | -0.01   |        | 0.11   | 0.11   | 0.07    |        |
| Seychelles            | — | — | — | — | — | — | — | — | (0.10, | (0.24, | (-0.18, | 0.873  | (0.00, | (0.00, | (-0.08, | 0.338  |
|                       |   |   |   |   |   |   |   |   | 46.11) | 35.00) | 0.16)   |        | 35.66) | 24.06) | 0.23)   |        |
|                       |   |   |   |   |   |   |   |   | 4.58   | 3.48   | -0.97   |        | 0.08   | 0.06   | -1.08   |        |
| Sierra Leone          | — | — | — | — | — | — | — | — | (3.05, | (2.60, | (-1.19, | <0.001 | (0.00, | (0.00, | (-1.50, | <0.001 |
|                       |   |   |   |   |   |   |   |   | 6.63)  | 4.57)  | -0.76)  |        | 0.81)  | 0.39)  | -0.65)  |        |
|                       |   |   |   |   |   |   |   |   | 5.99   | 2.51   | -3.01   |        | 0.10   | 0.04   | -3.58   |        |
| Singapore             | — | — | — | — | — | — | — | — | (4.38, | (1.68, | (-3.47, | <0.001 | (0.00, | (0.00, | (-4.31, | <0.001 |
|                       |   |   |   |   |   |   |   |   | 8.05)  | 3.77)  | -2.54)  |        | 0.81)  | 0.75)  | -2.85)  |        |
|                       |   |   |   |   |   |   |   |   | 8.04   | 6.82   | -0.56   |        | 0.14   | 0.12   | -0.49   |        |
| Slovakia              | — | — | — | — | — | — | — | — | (6.43, | (5.29, | (-1.05, | 0.022  | (0.01, | (0.01, | (-1.15, | 0.154  |
|                       |   |   |   |   |   |   |   |   | 9.95)  | 8.74)  | -0.08)  |        | 0.66)  | 0.80)  | 0.18)   |        |
|                       |   |   |   |   |   |   |   |   | 7.07   | 5.34   | -0.99   |        | 0.12   | 0.09   | -1.01   |        |
| Slovenia              | — | — | — | — | — | — | — | — | (4.71, | (3.10, | (-1.70, | 0.007  | (0.00, | (0.00, | (-2.13, | 0.082  |
|                       |   |   |   |   |   |   |   |   | 10.29) | 8.86)  | -0.27)  |        | 1.37)  | 1.96)  | 0.13)   |        |
|                       |   |   |   |   |   |   |   |   | 3.05   | 3.23   | 0.21    | <0.001 | 0.06   | 0.06   | 0.00    | 0.007  |
| Solomon Islands       | — | — | — | — | — | — | — | — |        |        |         |        |        |        |         |        |

|                         |   |   |   |   |   |   |   |   |                   |                 |                   |        |                 |                 |                   |        |
|-------------------------|---|---|---|---|---|---|---|---|-------------------|-----------------|-------------------|--------|-----------------|-----------------|-------------------|--------|
|                         |   |   |   |   |   |   |   |   | (0.19,<br>14.19)  | (0.85,<br>8.47) | (0.10,<br>0.33)   |        | (0.00,<br>8.95) | (0.00,<br>3.32) | (0.00,<br>0.00)*  |        |
|                         |   |   |   |   |   |   |   |   | 6.81              | 3.80            | -2.01             |        | 0.12            | 0.07            | -1.97             |        |
| Somalia                 | — | — | — | — | — | — | — | — | (5.40,<br>8.49)   | (3.16,<br>4.55) | (-2.15,<br>-1.86) | <0.001 | (0.01,<br>0.55) | (0.01,<br>0.24) | (-2.19,<br>-1.76) | <0.001 |
|                         |   |   |   |   |   |   |   |   | 19.26             | 6.60            | -3.54             |        | 0.34            | 0.11            | -3.59             |        |
| South Africa            | — | — | — | — | — | — | — | — | (18.27,<br>20.29) | (6.15,<br>7.07) | (-5.05,<br>-2.01) | <0.001 | (0.22,<br>0.50) | (0.06,<br>0.19) | (-4.99,<br>-2.16) | <0.001 |
|                         |   |   |   |   |   |   |   |   | 7.50              | 4.31            | -1.97             |        | 0.13            | 0.07            | -2.12             |        |
| South Sudan             | — | — | — | — | — | — | — | — | (5.80,<br>9.58)   | (3.34,<br>5.48) | (-2.54,<br>-1.40) | <0.001 | (0.00,<br>0.75) | (0.00,<br>0.40) | (-2.80,<br>-1.42) | <0.001 |
|                         |   |   |   |   |   |   |   |   | 3.99              | 3.89            | -0.14             |        | 0.07            | 0.07            | -0.04             |        |
| Spain                   | — | — | — | — | — | — | — | — | (3.54,<br>4.48)   | (3.42,<br>4.40) | (-0.40,<br>0.12)  | 0.291  | (0.02,<br>0.16) | (0.02,<br>0.17) | (-0.99,<br>0.92)  | 0.938  |
|                         |   |   |   |   |   |   |   |   | 4.97              | 4.36            | -0.40             |        | 0.08            | 0.07            | -0.43             |        |
| Sri Lanka               | — | — | — | — | — | — | — | — | (4.27,<br>5.76)   | (3.75,<br>5.04) | (-0.73,<br>-0.07) | 0.019  | (0.02,<br>0.25) | (0.02,<br>0.22) | (-1.23,<br>0.39)  | 0.302  |
|                         |   |   |   |   |   |   |   |   | 2.42              | 3.07            | 0.82              |        | 0.04            | 0.05            | 0.75              |        |
| Sudan                   | — | — | — | — | — | — | — | — | (1.94,<br>2.99)   | (2.71,<br>3.47) | (0.75,<br>0.89)   | <0.001 | (0.00,<br>0.19) | (0.01,<br>0.13) | (0.75,<br>0.75)   | <0.001 |
|                         |   |   |   |   |   |   |   |   | 3.52              | 3.19            | -0.37             |        | 0.06            | 0.06            | 0.05              |        |
| Suriname                | — | — | — | — | — | — | — | — | (0.56,<br>12.13)  | (0.77,<br>8.79) | (-1.05,<br>0.32)  | 0.297  | (0.00,<br>6.48) | (0.00,<br>3.65) | (-0.85,<br>0.97)  | 0.908  |
|                         |   |   |   |   |   |   |   |   | 8.44              | 5.21            | -1.57             |        | 0.15            | 0.09            | -1.96             |        |
| Sweden                  | — | — | — | — | — | — | — | — | (7.04,<br>10.07)  | (4.17,<br>6.45) | (-2.19,<br>-0.95) | <0.001 | (0.02,<br>0.54) | (0.01,<br>0.44) | (-2.31,<br>-1.61) | <0.001 |
|                         |   |   |   |   |   |   |   |   | 2.89              | 2.01            | -1.24             |        | 0.05            | 0.04            | -1.02             |        |
| Switzerland             | — | — | — | — | — | — | — | — | (2.05,<br>3.99)   | (1.35,<br>2.92) | (-1.52,<br>-0.96) | <0.001 | (0.00,<br>0.48) | (0.00,<br>0.44) | (-2.23,<br>0.20)  | 0.100  |
|                         |   |   |   |   |   |   |   |   | 1.80              | 1.79            | -0.01             |        | 0.03            | 0.03            | 0.00              |        |
| Syrian Arab<br>Republic | — | — | — | — | — | — | — | — | (1.26,<br>2.51)   | (1.31,<br>2.42) | (-0.23,<br>0.21)  | 0.943  | (0.00,<br>0.29) | (0.00,<br>0.25) | (0.00,<br>0.00)*  | <0.001 |
|                         |   |   |   |   |   |   |   |   | 3.32              | 6.45            | 2.38              | <0.001 | 0.06            | 0.11            | 2.35              | <0.001 |
| Taiwan (Province)       | — | — | — | — | — | — | — | — |                   |                 |                   |        |                 |                 |                   |        |

|                        |   |   |   |   |   |   |   |   |                    |                    |                   |        |                    |                    |                   |        |
|------------------------|---|---|---|---|---|---|---|---|--------------------|--------------------|-------------------|--------|--------------------|--------------------|-------------------|--------|
| of China)              |   |   |   |   |   |   |   |   | (2.81,<br>3.89)    | (5.70,<br>7.28)    | (2.10,<br>2.66)   |        | (0.01,<br>0.19)    | (0.04,<br>0.30)    | (2.10,<br>2.61)   |        |
|                        |   |   |   |   |   |   |   |   | 3.73               | 4.76               | 0.91              |        | 0.07               | 0.09               | 0.86              |        |
| Tajikistan             | — | — | — | — | — | — | — | — | (2.54,<br>5.31)    | (3.82,<br>5.87)    | (0.75,<br>1.07)   | <0.001 | (0.00,<br>0.63)    | (0.01,<br>0.37)    | (0.86,<br>0.86)   | <0.001 |
|                        |   |   |   |   |   |   |   |   | 2.99               | 2.62               | -0.48             |        | 0.05               | 0.04               | -0.76             |        |
| Thailand               | — | — | — | — | — | — | — | — | (2.69,<br>3.31)    | (2.35,<br>2.93)    | (-0.82,<br>-0.14) | 0.006  | (0.02,<br>0.11)    | (0.02,<br>0.10)    | (-2.84,<br>1.37)  | 0.482  |
|                        |   |   |   |   |   |   |   |   | 1.34               | 3.40               | 3.49              |        | 0.02               | 0.06               | 3.08              |        |
| Timor-Leste            | — | — | — | — | — | — | — | — | (0.15,<br>5.31)    | (1.40,<br>7.09)    | (2.77,<br>4.20)   | <0.001 | (0.00,<br>3.08)    | (0.00,<br>2.20)    | (1.29,<br>4.90)   | 0.001  |
|                        |   |   |   |   |   |   |   |   | 6.32               | 4.18               | -1.47             |        | 0.12               | 0.07               | -1.84             |        |
| Togo                   | — | — | — | — | — | — | — | — | (4.44,<br>8.75)    | (3.23,<br>5.32)    | (-1.84,<br>-1.10) | <0.001 | (0.00,<br>0.92)    | (0.00,<br>0.38)    | (-2.18,<br>-1.50) | <0.001 |
|                        |   |   |   |   |   |   |   |   | 5.86               | 5.53               | -0.21             |        | 0.11               | 0.10               | -0.36             |        |
| Tokelau                | — | — | — | — | — | — | — | — | (0.00,<br>1714.98) | (0.00,<br>2317.79) | (-0.25,<br>-0.16) | <0.001 | (0.00,<br>1704.28) | (0.00,<br>2308.26) | (-0.57,<br>-0.15) | 0.001  |
|                        |   |   |   |   |   |   |   |   | 1.28               | 1.39               | 0.26              |        | 0.02               | 0.02               | 0.00              |        |
| Tonga                  | — | — | — | — | — | — | — | — | (0.00,<br>30.98)   | (0.00,<br>23.88)   | (0.14,<br>0.39)   | <0.001 | (0.00,<br>28.64)   | (0.00,<br>21.20)   | (0.00,<br>0.00)*  | <0.001 |
|                        |   |   |   |   |   |   |   |   | 6.38               | 6.58               | 0.03              |        | 0.12               | 0.12               | 0.01              |        |
| Trinidad and<br>Tobago | — | — | — | — | — | — | — | — | (3.54,<br>10.62)   | (4.00,<br>10.44)   | (-0.33,<br>0.40)  | 0.859  | (0.00,<br>1.92)    | (0.00,<br>2.03)    | (-0.45,<br>0.48)  | 0.959  |
|                        |   |   |   |   |   |   |   |   | 3.12               | 3.44               | 0.35              |        | 0.05               | 0.06               | 0.62              |        |
| Tunisia                | — | — | — | — | — | — | — | — | (2.31,<br>4.14)    | (2.73,<br>4.30)    | (0.19,<br>0.50)   | <0.001 | (0.00,<br>0.38)    | (0.00,<br>0.30)    | (0.62,<br>0.62)   | <0.001 |
|                        |   |   |   |   |   |   |   |   | 5.09               | 4.58               | -0.30             |        | 0.09               | 0.08               | -0.38             |        |
| Turkey                 | — | — | — | — | — | — | — | — | (4.68,<br>5.52)    | (4.26,<br>4.91)    | (-0.67,<br>0.07)  | 0.114  | (0.04,<br>0.16)    | (0.04,<br>0.14)    | (-1.39,<br>0.64)  | 0.466  |
|                        |   |   |   |   |   |   |   |   | 2.12               | 4.69               | 2.77              |        | 0.04               | 0.08               | 2.79              |        |
| Turkmenistan           | — | — | — | — | — | — | — | — | (1.19,<br>3.54)    | (3.42,<br>6.29)    | (2.10,<br>3.45)   | <0.001 | (0.00,<br>0.69)    | (0.00,<br>0.58)    | (2.30,<br>3.28)   | <0.001 |

|                                 |   |   |   |   |   |   |   |   |         |         |         |        |         |         |         |        |
|---------------------------------|---|---|---|---|---|---|---|---|---------|---------|---------|--------|---------|---------|---------|--------|
|                                 |   |   |   |   |   |   |   |   | 4.95    | 5.28    | 0.21    |        | 0.09    | 0.10    | 0.36    |        |
| Tuvalu                          | — | — | — | — | — | — | — | — | (0.00,  | (0.00,  | (0.11,  | <0.001 | (0.00,  | (0.00,  | (0.36,  | <0.001 |
|                                 |   |   |   |   |   |   |   |   | 213.53) | 206.25) | 0.31)   |        | 203.88) | 195.96) | 0.36)   |        |
|                                 |   |   |   |   |   |   |   |   | 5.47    | 5.40    | -0.08   |        | 0.10    | 0.09    | -0.27   |        |
| Uganda                          | — | — | — | — | — | — | — | — | (4.61,  | (4.87,  | (-0.58, | 0.743  | (0.02,  | (0.04,  | (-0.92, | 0.421  |
|                                 |   |   |   |   |   |   |   |   | 6.46)   | 5.98)   | 0.42)   |        | 0.33)   | 0.21)   | 0.39)   |        |
|                                 |   |   |   |   |   |   |   |   | 3.33    | 8.03    | 2.98    |        | 0.06    | 0.14    | 2.93    |        |
| Ukraine                         | — | — | — | — | — | — | — | — | (2.98,  | (7.40,  | (2.18,  | <0.001 | (0.02,  | (0.07,  | (1.81,  | <0.001 |
|                                 |   |   |   |   |   |   |   |   | 3.71)   | 8.72)   | 3.79)   |        | 0.13)   | 0.27)   | 4.05)   |        |
|                                 |   |   |   |   |   |   |   |   | 4.02    | 4.71    | 0.52    |        | 0.07    | 0.08    | 0.65    |        |
| United Arab<br>Emirates         | — | — | — | — | — | — | — | — | (2.07,  | (3.44,  | (0.05,  | 0.031  | (0.00,  | (0.00,  | (-0.29, | 0.177  |
|                                 |   |   |   |   |   |   |   |   | 7.16)   | 6.36)   | 0.99)   |        | 1.63)   | 0.69)   | 1.59)   |        |
|                                 |   |   |   |   |   |   |   |   | 5.23    | 4.40    | -0.65   |        | 0.09    | 0.08    | -0.53   |        |
| United Kingdom                  | — | — | — | — | — | — | — | — | (4.80,  | (4.02,  | (-0.86, | <0.001 | (0.04,  | (0.03,  | (-1.03, | 0.044  |
|                                 |   |   |   |   |   |   |   |   | 5.68)   | 4.80)   | -0.45)  |        | 0.17)   | 0.15)   | -0.01)  |        |
|                                 |   |   |   |   |   |   |   |   | 7.48    | 5.88    | -0.82   |        | 0.13    | 0.10    | -0.92   |        |
| United Republic of<br>Tanzania  | — | — | — | — | — | — | — | — | (6.68,  | (5.42,  | (-0.95, | <0.001 | (0.04,  | (0.05,  | (-1.34, | <0.001 |
|                                 |   |   |   |   |   |   |   |   | 8.35)   | 6.37)   | -0.69)  |        | 0.30)   | 0.19)   | -0.49)  |        |
|                                 |   |   |   |   |   |   |   |   | 6.75    | 5.64    | -0.64   |        | 0.12    | 0.10    | -0.66   |        |
| United States of<br>America     | — | — | — | — | — | — | — | — | (6.54,  | (5.45,  | (-0.93, | <0.001 | (0.09,  | (0.08,  | (-1.12, | 0.006  |
|                                 |   |   |   |   |   |   |   |   | 6.98)   | 5.84)   | -0.36)  |        | 0.15)   | 0.13)   | -0.19)  |        |
|                                 |   |   |   |   |   |   |   |   | 4.11    | 2.41    | -1.82   |        | 0.07    | 0.04    | -2.30   |        |
| United States<br>Virgin Islands | — | — | — | — | — | — | — | — | (0.06,  | (0.00,  | (-2.00, | <0.001 | (0.00,  | (0.00,  | (-2.77, | <0.001 |
|                                 |   |   |   |   |   |   |   |   | 26.86)  | 30.36)  | -1.64)  |        | 19.60)  | 26.12)  | -1.83)  |        |
|                                 |   |   |   |   |   |   |   |   | 11.85   | 9.10    | -1.16   |        | 0.21    | 0.16    | -1.17   |        |
| Uruguay                         | — | — | — | — | — | — | — | — | (9.19,  | (6.89,  | (-1.40, | <0.001 | (0.01,  | (0.00,  | (-1.44, | <0.001 |
|                                 |   |   |   |   |   |   |   |   | 15.03)  | 11.81)  | -0.92)  |        | 1.04)   | 0.94)   | -0.90)  |        |
|                                 |   |   |   |   |   |   |   |   | 1.14    | 2.91    | 3.29    |        | 0.02    | 0.05    | 3.24    |        |
| Uzbekistan                      | — | — | — | — | — | — | — | — | (0.83,  | (2.53,  | (2.86,  | <0.001 | (0.00,  | (0.01,  | (1.23,  | 0.001  |
|                                 |   |   |   |   |   |   |   |   | 1.53)   | 3.34)   | 3.72)   |        | 0.14)   | 0.14)   | 5.28)   |        |
|                                 |   |   |   |   |   |   |   |   | 2.87    | 4.55    | 1.51    |        | 0.05    | 0.08    | 1.17    |        |
| Vanuatu                         | — | — | — | — | — | — | — | — | (0.02,  | (0.73,  | (1.21,  | <0.001 | (0.00,  | (0.00,  | (0.33,  | 0.006  |
|                                 |   |   |   |   |   |   |   |   | 21.18)  | 15.15)  | 1.81)   |        | 15.98)  | 7.65)   | 2.02)   |        |



|                |   |   |   |   |   |   |   |   |         |         |         |        |        |        |         |        |
|----------------|---|---|---|---|---|---|---|---|---------|---------|---------|--------|--------|--------|---------|--------|
| Venezuela      |   |   |   |   |   |   |   |   | 4.43    | 6.05    | 1.01    |        | 0.08   | 0.10   | 0.85    |        |
| (Bolivarian    | — | — | — | — | — | — | — | — | (3.78,  | (5.42,  | (0.17,  | 0.019  | (0.02, | (0.04, | (-0.31, | 0.151  |
| Republic of)   |   |   |   |   |   |   |   |   | 5.15)   | 6.73)   | 1.87)   |        | 0.23)  | 0.23)  | 2.02)   |        |
|                |   |   |   |   |   |   |   |   | 3.30    | 4.17    | 0.82    |        | 0.06   | 0.07   | 0.44    |        |
| Viet Nam       | — | — | — | — | — | — | — | — | (2.99,  | (3.90,  | (0.69,  | <0.001 | (0.02, | (0.04, | (0.44,  | <0.001 |
|                |   |   |   |   |   |   |   |   | 3.63)   | 4.46)   | 0.95)   |        | 0.12)  | 0.12)  | 0.44)   |        |
|                |   |   |   |   |   |   |   |   | 1.58    | 2.50    | 1.69    |        | 0.03   | 0.04   | 0.98    |        |
| Yemen          | — | — | — | — | — | — | — | — | (1.09,  | (2.12,  | (1.38,  | <0.001 | (0.00, | (0.01, | (0.98,  | <0.001 |
|                |   |   |   |   |   |   |   |   | 2.22)   | 2.92)   | 2.00)   |        | 0.25)  | 0.14)  | 0.98)   |        |
|                |   |   |   |   |   |   |   |   | 7.72    | 6.67    | -0.52   |        | 0.13   | 0.12   | -0.32   |        |
| Zambia         | — | — | — | — | — | — | — | — | (6.23,  | (5.83,  | (-0.79, | <0.001 | (0.01, | (0.03, | (-0.60, | 0.030  |
|                |   |   |   |   |   |   |   |   | 9.48)   | 7.61)   | -0.24)  |        | 0.62)  | 0.31)  | -0.03)  |        |
|                |   |   |   |   |   |   |   |   | 7.09    | 9.34    | 0.92    |        | 0.13   | 0.16   | 0.92    |        |
| Zimbabwe       | — | — | — | — | — | — | — | — | (5.87,  | (8.27,  | (0.27,  | 0.006  | (0.02, | (0.05, | (-0.50, | 0.204  |
|                |   |   |   |   |   |   |   |   | 8.50)   | 10.51)  | 1.57)   |        | 0.47)  | 0.39)  | 2.35)   |        |
| <b>Men</b>     |   |   |   |   |   |   |   |   |         |         |         |        |        |        |         |        |
|                |   |   |   |   |   |   |   |   | 8.16    | 7.89    | -0.02   |        | 0.14   | 0.14   | 0.08    |        |
| Afghanistan    | — | — | — | — | — | — | — | — | (6.61,  | (7.20,  | (-0.13, | 0.792  | (0.01, | (0.06, | (-0.14, | 0.482  |
|                |   |   |   |   |   |   |   |   | 10.01)  | 8.65)   | 0.10)   |        | 0.66)  | 0.28)  | 0.30)   |        |
|                |   |   |   |   |   |   |   |   | 9.76    | 13.96   | 1.26    |        | 0.16   | 0.23   | 1.10    |        |
| Albania        | — | — | — | — | — | — | — | — | (7.59,  | (10.88, | (0.41,  | 0.003  | (0.01, | (0.01, | (0.34,  | 0.004  |
|                |   |   |   |   |   |   |   |   | 12.39)  | 17.68)  | 2.11)   |        | 0.90)  | 1.25)  | 1.86)   |        |
|                |   |   |   |   |   |   |   |   | 9.70    | 7.26    | -0.88   |        | 0.17   | 0.12   | -1.07   |        |
| Algeria        | — | — | — | — | — | — | — | — | (8.80,  | (6.72,  | (-1.18, | <0.001 | (0.07, | (0.06, | (-1.38, | <0.001 |
|                |   |   |   |   |   |   |   |   | 10.66)  | 7.85)   | -0.59)  |        | 0.35)  | 0.23)  | -0.75)  |        |
|                |   |   |   |   |   |   |   |   | 21.97   | 17.17   | -1.02   |        | 0.39   | 0.30   | -1.06   |        |
| American Samoa | — | — | — | — | — | — | — | — | (2.62,  | (1.21,  | (-1.27, | <0.001 | (0.00, | (0.00, | (-1.33, | <0.001 |
|                |   |   |   |   |   |   |   |   | 82.81)  | 77.53)  | -0.77)  |        | 46.14) | 48.35) | -0.80)  |        |
|                |   |   |   |   |   |   |   |   | 18.24   | 15.69   | -0.51   |        | 0.32   | 0.28   | -0.44   |        |
| Andorra        | — | — | — | — | — | — | — | — | (3.16,  | (2.32,  | (-0.61, | <0.001 | (0.00, | (0.00, | (-0.62, | <0.001 |
|                |   |   |   |   |   |   |   |   | 66.34)  | 61.11)  | -0.41)  |        | 39.65) | 37.96) | -0.25)  |        |
|                |   |   |   |   |   |   |   |   | 15.74   | 14.59   | -0.23   |        | 0.27   | 0.25   | -0.31   |        |
| Angola         | — | — | — | — | — | — | — | — | (13.96, | (13.51, | (-1.03, | 0.573  | (0.09, | (0.13, | (-0.55, | 0.011  |

|                     |   |   |   |   |   |   |   |   |         |         |         |        |        |        |         |        |
|---------------------|---|---|---|---|---|---|---|---|---------|---------|---------|--------|--------|--------|---------|--------|
|                     |   |   |   |   |   |   |   |   | 17.70)  | 15.74)  | 0.57)   |        | 0.66)  | 0.45)  | -0.07)  |        |
|                     |   |   |   |   |   |   |   |   | 8.16    | 6.36    | -0.99   |        | 0.14   | 0.11   | -0.62   |        |
| Antigua and Barbuda | — | — | — | — | — | — | — | — | (0.18,  | (0.21,  | (-1.85, | 0.027  | (0.00, | (0.00, | (-1.42, | 0.131  |
|                     |   |   |   |   |   |   |   |   | 49.76)  | 34.57)  | -0.11)  |        | 35.41) | 23.35) | 0.19)   |        |
|                     |   |   |   |   |   |   |   |   | 14.10   | 12.95   | -0.31   |        | 0.24   | 0.23   | -0.22   |        |
| Argentina           | — | — | — | — | — | — | — | — | (13.16, | (12.21, | (-0.58, | 0.027  | (0.14, | (0.14, | (-0.61, | 0.261  |
|                     |   |   |   |   |   |   |   |   | 15.09)  | 13.73)  | -0.03)  |        | 0.41)  | 0.35)  | 0.17)   |        |
|                     |   |   |   |   |   |   |   |   | 19.78   | 27.09   | 1.16    |        | 0.35   | 0.48   | 1.17    |        |
| Armenia             | — | — | — | — | — | — | — | — | (16.62, | (23.12, | (0.11,  | 0.031  | (0.06, | (0.10, | (0.14,  | 0.025  |
|                     |   |   |   |   |   |   |   |   | 23.38)  | 31.66)  | 2.23)   |        | 1.17)  | 1.62)  | 2.21)   |        |
|                     |   |   |   |   |   |   |   |   | 15.08   | 7.79    | -2.29   |        | 0.26   | 0.14   | -2.20   |        |
| Australia           | — | — | — | — | — | — | — | — | (13.82, | (7.00,  | (-2.81, | <0.001 | (0.12, | (0.05, | (-2.88, | <0.001 |
|                     |   |   |   |   |   |   |   |   | 16.43)  | 8.66)   | -1.77)  |        | 0.50)  | 0.31)  | -1.51)  |        |
|                     |   |   |   |   |   |   |   |   | 22.76   | 13.07   | -1.90   |        | 0.39   | 0.23   | -1.82   |        |
| Austria             | — | — | — | — | — | — | — | — | (20.44, | (11.33, | (-2.35, | <0.001 | (0.14, | (0.06, | (-2.42, | <0.001 |
|                     |   |   |   |   |   |   |   |   | 25.30)  | 15.04)  | -1.44)  |        | 0.89)  | 0.68)  | -1.22)  |        |
|                     |   |   |   |   |   |   |   |   | 5.52    | 5.31    | -0.29   |        | 0.10   | 0.09   | -0.43   |        |
| Azerbaijan          | — | — | — | — | — | — | — | — | (4.35,  | (4.41,  | (-1.38, | 0.607  | (0.01, | (0.01, | (-1.57, | 0.461  |
|                     |   |   |   |   |   |   |   |   | 6.93)   | 6.37)   | 0.81)   |        | 0.48)  | 0.37)  | 0.72)   |        |
|                     |   |   |   |   |   |   |   |   | 15.00   | 18.60   | 0.81    |        | 0.26   | 0.33   | 0.83    |        |
| Bahamas             | — | — | — | — | — | — | — | — | (6.41,  | (10.12, | (-0.11, | 0.084  | (0.00, | (0.00, | (-0.26, | 0.136  |
|                     |   |   |   |   |   |   |   |   | 30.27)  | 31.47)  | 1.73)   |        | 8.62)  | 5.96)  | 1.92)   |        |
|                     |   |   |   |   |   |   |   |   | 6.52    | 5.64    | -0.60   |        | 0.11   | 0.10   | -0.11   |        |
| Bahrain             | — | — | — | — | — | — | — | — | (3.13,  | (3.42,  | (-1.39, | 0.141  | (0.00, | (0.00, | (-0.64, | 0.694  |
|                     |   |   |   |   |   |   |   |   | 13.04)  | 9.10)   | 0.20)   |        | 4.54)  | 1.97)  | 0.43)   |        |
|                     |   |   |   |   |   |   |   |   | 6.40    | 6.39    | 0.03    |        | 0.11   | 0.11   | -0.05   |        |
| Bangladesh          | — | — | — | — | — | — | — | — | (6.05,  | (6.11,  | (-0.55, | 0.926  | (0.07, | (0.08, | (-1.00, | 0.927  |
|                     |   |   |   |   |   |   |   |   | 6.77)   | 6.67)   | 0.61)   |        | 0.17)  | 0.15)  | 0.92)   |        |
|                     |   |   |   |   |   |   |   |   | 10.42   | 8.42    | -0.78   |        | 0.18   | 0.15   | -0.77   |        |
| Barbados            | — | — | — | — | — | — | — | — | (3.63,  | (2.42,  | (-1.74, | 0.117  | (0.00, | (0.00, | (-1.99, | 0.226  |
|                     |   |   |   |   |   |   |   |   | 23.50)  | 21.39)  | 0.20)   |        | 7.58)  | 8.30)  | 0.48)   |        |
|                     |   |   |   |   |   |   |   |   | 9.12    | 15.19   | 1.77    |        | 0.16   | 0.27   | 1.87    |        |
| Belarus             | — | — | — | — | — | — | — | — | (7.85,  | (13.41, | (0.71,  | 0.001  | (0.04, | (0.08, | (0.86,  | <0.001 |

|                   |   |   |   |   |   |   |   |   |   |         |         |         |        |        |        |         |        |
|-------------------|---|---|---|---|---|---|---|---|---|---------|---------|---------|--------|--------|--------|---------|--------|
|                   |   |   |   |   |   |   |   |   |   | 10.54)  | 17.19)  | 2.85)   |        | 0.47)  | 0.73)  | 2.89)   |        |
|                   |   |   |   |   |   |   |   |   |   | 15.50)  | 7.50)   | -2.50)  |        | 0.27)  | 0.13)  | -2.44)  |        |
| Belgium           | — | — | — | — | — | — | — | — | — | (13.80, | (6.31,  | (-2.89, | <0.001 | (0.09, | (0.02, | (-3.40, | <0.001 |
|                   |   |   |   |   |   |   |   |   |   | 17.36)  | 8.86)   | -2.10)  |        | 0.64)  | 0.46)  | -1.48)  |        |
|                   |   |   |   |   |   |   |   |   |   | 3.82)   | 5.81)   | 1.45)   |        | 0.07)  | 0.10)  | 1.36)   |        |
| Belize            | — | — | — | — | — | — | — | — | — | (0.17,  | (1.82,  | (0.73,  | <0.001 | (0.00, | (0.00, | (0.42,  | 0.004  |
|                   |   |   |   |   |   |   |   |   |   | 20.66)  | 14.05)  | 2.17)   |        | 14.39) | 5.10)  | 2.32)   |        |
|                   |   |   |   |   |   |   |   |   |   | 10.95)  | 10.53)  | -0.13)  |        | 0.19)  | 0.18)  | -0.13)  |        |
| Benin             | — | — | — | — | — | — | — | — | — | (8.59,  | (9.15,  | (-0.31, | 0.165  | (0.01, | (0.05, | (-0.77, | 0.700  |
|                   |   |   |   |   |   |   |   |   |   | 13.78)  | 12.07)  | 0.05)   |        | 0.96)  | 0.51)  | 0.52)   |        |
|                   |   |   |   |   |   |   |   |   |   | 23.14)  | 12.46)  | -2.58)  |        | 0.40)  | 0.22)  | -2.56)  |        |
| Bermuda           | — | — | — | — | — | — | — | — | — | (4.90,  | (0.54,  | (-2.80, | <0.001 | (0.00, | (0.00, | (-2.82, | <0.001 |
|                   |   |   |   |   |   |   |   |   |   | 74.64)  | 72.12)  | -2.36)  |        | 40.50) | 52.55) | -2.29)  |        |
|                   |   |   |   |   |   |   |   |   |   | 5.95)   | 6.46)   | 0.26)   |        | 0.11)  | 0.11)  | 0.09)   |        |
| Bhutan            | — | — | — | — | — | — | — | — | — | (2.32,  | (3.33,  | (0.15,  | <0.001 | (0.00, | (0.00, | (-0.44, | 0.753  |
|                   |   |   |   |   |   |   |   |   |   | 12.86)  | 11.41)  | 0.37)   |        | 4.20)  | 2.48)  | 0.62)   |        |
| Bolivia           |   |   |   |   |   |   |   |   |   | 9.76)   | 7.91)   | -0.73)  |        | 0.17)  | 0.14)  | -0.68)  |        |
| (Plurinational    | — | — | — | — | — | — | — | — | — | (7.99,  | (6.82,  | (-1.08, | <0.001 | (0.02, | (0.03, | (-0.98, | <0.001 |
| State of)         |   |   |   |   |   |   |   |   |   | 11.82)  | 9.14)   | -0.37)  |        | 0.67)  | 0.39)  | -0.38)  |        |
|                   |   |   |   |   |   |   |   |   |   | 18.45)  | 19.11)  | -0.11)  |        | 0.33)  | 0.34)  | -0.09)  |        |
| Bosnia and        |   |   |   |   |   |   |   |   |   | (15.90, | (15.68, | (-0.70, | 0.718  | (0.08, | (0.04, | (-0.63, | 0.748  |
| Herzegovina       | — | — | — | — | — | — | — | — | — | 21.30)  | 23.13)  | 0.48)   |        | 0.94)  | 1.39)  | 0.46)   |        |
|                   |   |   |   |   |   |   |   |   |   | 15.32)  | 14.07)  | -0.26)  |        | 0.27)  | 0.24)  | -0.30)  |        |
| Botswana          | — | — | — | — | — | — | — | — | — | (10.39, | (11.07, | (-0.55, | 0.085  | (0.00, | (0.01, | (-0.88, | 0.307  |
|                   |   |   |   |   |   |   |   |   |   | 21.93)  | 17.65)  | 0.04)   |        | 2.69)  | 1.18)  | 0.28)   |        |
|                   |   |   |   |   |   |   |   |   |   | 21.47)  | 26.15)  | 0.69)   |        | 0.38)  | 0.46)  | 0.68)   |        |
| Brazil            | — | — | — | — | — | — | — | — | — | (20.93, | (25.68, | (0.43,  | <0.001 | (0.31, | (0.40, | (0.44,  | <0.001 |
|                   |   |   |   |   |   |   |   |   |   | 22.02)  | 26.63)  | 0.96)   |        | 0.46)  | 0.53)  | 0.92)   |        |
|                   |   |   |   |   |   |   |   |   |   | 32.97)  | 24.25)  | -1.07)  |        | 0.57)  | 0.43)  | -0.97)  |        |
| Brunei Darussalam | — | — | — | — | — | — | — | — | — | (20.65, | (16.17, | (-1.57, | <0.001 | (0.00, | (0.00, | (-1.59, | 0.002  |
|                   |   |   |   |   |   |   |   |   |   | 50.30)  | 35.35)  | -0.57)  |        | 7.46)  | 4.91)  | -0.35)  |        |
|                   |   |   |   |   |   |   |   |   |   | 32.97)  | 47.77)  | 1.37)   |        | 0.56)  | 0.81)  | 1.37)   |        |
| Bulgaria          | — | — | — | — | — | — | — | — | — | (30.15, | (43.67, | (0.68,  | <0.001 | (0.25, | (0.37, | (0.68,  | <0.001 |

|                          |   |   |   |   |   |   |   |   |         |         |         |        |        |        |         |        |
|--------------------------|---|---|---|---|---|---|---|---|---------|---------|---------|--------|--------|--------|---------|--------|
|                          |   |   |   |   |   |   |   |   | 35.99)  | 52.19)  | 2.07)   |        | 1.09)  | 1.64)  | 2.07)   |        |
|                          |   |   |   |   |   |   |   |   | 7.00    | 8.16    | 0.61    |        | 0.12   | 0.14   | 0.54    |        |
| Burkina Faso             | — | — | — | — | — | — | — | — | (5.55,  | (7.23,  | (0.30,  | <0.001 | (0.01, | (0.05, | (-0.28, | 0.196  |
|                          |   |   |   |   |   |   |   |   | 8.72)   | 9.18)   | 0.92)   |        | 0.58)  | 0.35)  | 1.36)   |        |
|                          |   |   |   |   |   |   |   |   | 25.36   | 13.17   | -2.27   |        | 0.44   | 0.23   | -2.25   |        |
| Burundi                  | — | — | — | — | — | — | — | — | (22.19, | (11.65, | (-2.50, | <0.001 | (0.12, | (0.07, | (-2.56, | <0.001 |
|                          |   |   |   |   |   |   |   |   | 28.88)  | 14.83)  | -2.03)  |        | 1.17)  | 0.55)  | -1.94)  |        |
|                          |   |   |   |   |   |   |   |   | 12.28   | 10.88   | -0.50   |        | 0.22   | 0.19   | -0.52   |        |
| Cabo Verde               | — | — | — | — | — | — | — | — | (4.07,  | (5.98,  | (-1.15, | 0.137  | (0.00, | (0.00, | (-1.11, | 0.087  |
|                          |   |   |   |   |   |   |   |   | 30.25)  | 18.36)  | 0.16)   |        | 12.55) | 3.55)  | 0.08)   |        |
|                          |   |   |   |   |   |   |   |   | 5.23    | 5.20    | -0.00   |        | 0.09   | 0.09   | -0.05   |        |
| Cambodia                 | — | — | — | — | — | — | — | — | (4.15,  | (4.47,  | (-0.12, | 0.984  | (0.00, | (0.02, | (-0.18, | 0.477  |
|                          |   |   |   |   |   |   |   |   | 6.54)   | 6.01)   | 0.12)   |        | 0.47)  | 0.26)  | 0.08)   |        |
|                          |   |   |   |   |   |   |   |   | 9.37    | 12.28   | 0.93    |        | 0.16   | 0.22   | 1.07    |        |
| Cameroon                 | — | — | — | — | — | — | — | — | (7.90,  | (11.35, | (0.69,  | <0.001 | (0.03, | (0.11, | (0.52,  | <0.001 |
|                          |   |   |   |   |   |   |   |   | 11.06)  | 13.27)  | 1.17)   |        | 0.55)  | 0.39)  | 1.63)   |        |
|                          |   |   |   |   |   |   |   |   | 15.61   | 10.02   | -1.50   |        | 0.27   | 0.18   | -1.29   |        |
| Canada                   | — | — | — | — | — | — | — | — | (14.62, | (9.24,  | (-1.88, | <0.001 | (0.15, | (0.09, | (-1.62, | <0.001 |
|                          |   |   |   |   |   |   |   |   | 16.66)  | 10.85)  | -1.13)  |        | 0.45)  | 0.32)  | -0.96)  |        |
|                          |   |   |   |   |   |   |   |   | 17.20   | 14.57   | -0.64   |        | 0.30   | 0.25   | -0.67   |        |
| Central African Republic | — | — | — | — | — | — | — | — | (13.55, | (12.16, | (-1.01, | 0.001  | (0.02, | (0.04, | (-1.17, | 0.009  |
|                          |   |   |   |   |   |   |   |   | 21.59)  | 17.34)  | -0.26)  |        | 1.53)  | 0.90)  | -0.17)  |        |
|                          |   |   |   |   |   |   |   |   | 7.25    | 8.63    | 0.77    |        | 0.13   | 0.15   | 0.70    |        |
| Chad                     | — | — | — | — | — | — | — | — | (5.54,  | (7.45,  | (0.27,  | 0.002  | (0.00, | (0.03, | (0.23,  | 0.004  |
|                          |   |   |   |   |   |   |   |   | 9.34)   | 9.96)   | 1.28)   |        | 0.73)  | 0.44)  | 1.18)   |        |
|                          |   |   |   |   |   |   |   |   | 13.36   | 17.98   | 1.07    |        | 0.23   | 0.31   | 1.03    |        |
| Chile                    | — | — | — | — | — | — | — | — | (12.02, | (16.61, | (0.61,  | <0.001 | (0.09, | (0.16, | (0.44,  | 0.001  |
|                          |   |   |   |   |   |   |   |   | 14.82)  | 19.44)  | 1.53)   |        | 0.50)  | 0.57)  | 1.63)   |        |
|                          |   |   |   |   |   |   |   |   | 8.88    | 10.22   | 0.50    |        | 0.15   | 0.18   | 0.60    |        |
| China                    | — | — | — | — | — | — | — | — | (8.76,  | (10.11, | (0.09,  | 0.017  | (0.14, | (0.17, | (-0.12, | 0.104  |
|                          |   |   |   |   |   |   |   |   | 8.99)   | 10.34)  | 0.91)   |        | 0.17)  | 0.20)  | 1.32)   |        |
|                          |   |   |   |   |   |   |   |   | 21.75   | 19.02   | -0.51   |        | 0.38   | 0.33   | -0.52   |        |
| Colombia                 | — | — | — | — | — | — | — | — | (20.61, | (18.15, | (-1.16, | 0.122  | (0.24, | (0.23, | (-1.20, | 0.139  |

|                   |   |   |   |   |   |   |   |   |         |         |         |        |         |         |         |        |
|-------------------|---|---|---|---|---|---|---|---|---------|---------|---------|--------|---------|---------|---------|--------|
|                   |   |   |   |   |   |   |   |   | 22.93)  | 19.92)  | 0.14)   |        | 0.57)   | 0.47)   | 0.17)   |        |
|                   |   |   |   |   |   |   |   |   | 17.14   | 12.38   | -1.14   |        | 0.30    | 0.21    | -1.20   |        |
| Comoros           | — | — | — | — | — | — | — | — | (8.74,  | (7.28,  | (-3.53, | 0.357  | (0.00,  | (0.00,  | (-3.31, | 0.274  |
|                   |   |   |   |   |   |   |   |   | 30.79)  | 19.78)  | 1.31)   |        | 7.22)   | 3.24)   | 0.96)   |        |
|                   |   |   |   |   |   |   |   |   | 24.28   | 14.09   | -1.87   |        | 0.42    | 0.25    | -1.78   |        |
| Congo             | — | — | — | — | — | — | — | — | (19.61, | (11.85, | (-2.41, | <0.001 | (0.03,  | (0.04,  | (-2.28, | <0.001 |
|                   |   |   |   |   |   |   |   |   | 29.80)  | 16.63)  | -1.33)  |        | 1.87)   | 0.81)   | -1.27)  |        |
|                   |   |   |   |   |   |   |   |   | 34.55   | 34.08   | -0.05   |        | 0.61    | 0.60    | -0.05   |        |
| Cook Islands      | — | — | — | — | — | — | — | — | (1.56,  | (0.60,  | (-0.13, | 0.283  | (0.00,  | (0.00,  | (-0.19, | 0.523  |
|                   |   |   |   |   |   |   |   |   | 180.84) | 207.63) | 0.04)   |        | 122.30) | 145.08) | 0.10)   |        |
|                   |   |   |   |   |   |   |   |   | 16.01   | 27.89   | 1.96    |        | 0.27    | 0.47    | 1.94    |        |
| Costa Rica        | — | — | — | — | — | — | — | — | (13.00, | (24.61, | (0.28,  | 0.022  | (0.02,  | (0.14,  | (0.24,  | 0.025  |
|                   |   |   |   |   |   |   |   |   | 19.55)  | 31.50)  | 3.66)   |        | 1.17)   | 1.19)   | 3.67)   |        |
|                   |   |   |   |   |   |   |   |   | 11.68   | 11.08   | -0.15   |        | 0.20    | 0.19    | -0.24   |        |
| Cote d'Ivoire     | — | — | — | — | — | — | — | — | (10.27, | (10.19, | (-0.42, | 0.288  | (0.06,  | (0.09,  | (-0.53, | 0.118  |
|                   |   |   |   |   |   |   |   |   | 13.23)  | 12.03)  | 0.12)   |        | 0.52)   | 0.36)   | 0.06)   |        |
|                   |   |   |   |   |   |   |   |   | 20.52   | 24.60   | 0.50    |        | 0.36    | 0.43    | 0.49    |        |
| Croatia           | — | — | — | — | — | — | — | — | (17.80, | (21.11, | (0.10,  | 0.014  | (0.09,  | (0.09,  | (0.11,  | 0.012  |
|                   |   |   |   |   |   |   |   |   | 23.57)  | 28.58)  | 0.90)   |        | 1.03)   | 1.39)   | 0.87)   |        |
|                   |   |   |   |   |   |   |   |   | 12.01   | 8.40    | -1.33   |        | 0.21    | 0.15    | -1.33   |        |
| Cuba              | — | — | — | — | — | — | — | — | (10.62, | (7.15,  | (-1.80, | <0.001 | (0.06,  | (0.03,  | (-1.91, | <0.001 |
|                   |   |   |   |   |   |   |   |   | 13.54)  | 9.82)   | -0.86)  |        | 0.51)   | 0.46)   | -0.73)  |        |
|                   |   |   |   |   |   |   |   |   | 16.13   | 14.04   | -0.29   |        | 0.28    | 0.24    | -0.44   |        |
| Cyprus            | — | — | — | — | — | — | — | — | (10.51, | (9.97,  | (-0.70, | 0.159  | (0.00,  | (0.00,  | (-1.39, | 0.370  |
|                   |   |   |   |   |   |   |   |   | 23.78)  | 19.64)  | 0.12)   |        | 3.08)   | 2.73)   | 0.52)   |        |
|                   |   |   |   |   |   |   |   |   | 19.96   | 17.78   | -0.34   |        | 0.35    | 0.31    | -0.32   |        |
| Czechia           | — | — | — | — | — | — | — | — | (18.01, | (15.85, | (-1.23, | 0.450  | (0.14,  | (0.11,  | (-1.25, | 0.505  |
|                   |   |   |   |   |   |   |   |   | 22.06)  | 19.91)  | 0.55)   |        | 0.74)   | 0.77)   | 0.62)   |        |
| Democratic        |   |   |   |   |   |   |   |   | 14.55   | 15.47   | 0.21    |        | 0.25    | 0.27    | 0.21    |        |
| People's Republic | — | — | — | — | — | — | — | — | (13.36, | (14.45, | (0.16,  | <0.001 | (0.12,  | (0.15,  | (-0.19, | 0.302  |
| of Korea          |   |   |   |   |   |   |   |   | 15.82)  | 16.54)  | 0.25)   |        | 0.48)   | 0.45)   | 0.60)   |        |
| Democratic        |   |   |   |   |   |   |   |   | 13.29   | 11.03   | -0.65   |        | 0.23    | 0.19    | -0.61   |        |
| Republic of the   | — | — | — | — | — | — | — | — | (12.38, | (10.51, | (-0.84, | <0.001 | (0.13,  | (0.13,  | (-0.93, | <0.001 |

|                    |   |   |   |   |   |   |   |   |   |         |         |         |        |        |        |         |        |
|--------------------|---|---|---|---|---|---|---|---|---|---------|---------|---------|--------|--------|--------|---------|--------|
| Congo              |   |   |   |   |   |   |   |   |   | 14.24)  | 11.57)  | -0.47)  |        | 0.40)  | 0.28)  | -0.30)  |        |
|                    |   |   |   |   |   |   |   |   |   | 18.27   | 9.69    | -2.20   |        | 0.32   | 0.17   | -2.26   |        |
| Denmark            | — | — | — | — | — | — | — | — | — | (15.72, | (7.80,  | (-2.80, | <0.001 | (0.07, | (0.01, | (-2.97, | <0.001 |
|                    |   |   |   |   |   |   |   |   |   | 21.13)  | 11.92)  | -1.59)  |        | 0.95)  | 0.75)  | -1.53)  |        |
|                    |   |   |   |   |   |   |   |   |   | 16.71   | 13.61   | -0.66   |        | 0.29   | 0.23   | -0.75   |        |
| Djibouti           | — | — | — | — | — | — | — | — | — | (9.43,  | (9.50,  | (-1.23, | 0.023  | (0.00, | (0.00, | (-1.74, | 0.145  |
|                    |   |   |   |   |   |   |   |   |   | 27.77)  | 18.90)  | -0.09)  |        | 5.41)  | 1.90)  | 0.26)   |        |
|                    |   |   |   |   |   |   |   |   |   | 11.22   | 9.90    | -0.39   |        | 0.20   | 0.17   | -0.53   |        |
| Dominica           | — | — | — | — | — | — | — | — | — | (0.80,  | (0.51,  | (-0.75, | 0.031  | (0.00, | (0.00, | (-0.85, | 0.001  |
|                    |   |   |   |   |   |   |   |   |   | 50.77)  | 46.88)  | -0.04)  |        | 31.79) | 29.13) | -0.21)  |        |
|                    |   |   |   |   |   |   |   |   |   | 9.55    | 11.72   | 0.78    |        | 0.17   | 0.21   | 0.82    |        |
| Dominican Republic | — | — | — | — | — | — | — | — | — | (7.93,  | (10.35, | (0.21,  | 0.008  | (0.02, | (0.06, | (0.18,  | 0.012  |
|                    |   |   |   |   |   |   |   |   |   | 11.42)  | 13.24)  | 1.36)   |        | 0.62)  | 0.50)  | 1.47)   |        |
|                    |   |   |   |   |   |   |   |   |   | 11.89   | 13.28   | 0.26    |        | 0.21   | 0.23   | 0.21    |        |
| Ecuador            | — | — | — | — | — | — | — | — | — | (10.35, | (12.09, | (-0.48, | 0.494  | (0.05, | (0.10, | (-0.59, | 0.612  |
|                    |   |   |   |   |   |   |   |   |   | 13.61)  | 14.55)  | 1.00)   |        | 0.57)  | 0.46)  | 1.01)   |        |
|                    |   |   |   |   |   |   |   |   |   | 12.83   | 13.82   | 0.28    |        | 0.22   | 0.23   | 0.23    |        |
| Egypt              | — | — | — | — | — | — | — | — | — | (12.16, | (13.32, | (-0.33, | 0.374  | (0.14, | (0.17, | (-0.34, | 0.427  |
|                    |   |   |   |   |   |   |   |   |   | 13.54)  | 14.34)  | 0.89)   |        | 0.33)  | 0.31)  | 0.80)   |        |
|                    |   |   |   |   |   |   |   |   |   | 8.59    | 9.87    | 0.40    |        | 0.15   | 0.17   | 0.45    |        |
| El Salvador        | — | — | — | — | — | — | — | — | — | (6.75,  | (8.11,  | (-1.22, | 0.631  | (0.01, | (0.02, | (-1.07, | 0.564  |
|                    |   |   |   |   |   |   |   |   |   | 10.80)  | 11.92)  | 2.04)   |        | 0.77)  | 0.67)  | 1.99)   |        |
|                    |   |   |   |   |   |   |   |   |   | 16.72   | 10.84   | -1.45   |        | 0.29   | 0.19   | -1.44   |        |
| Equatorial Guinea  | — | — | — | — | — | — | — | — | — | (7.97,  | (7.37,  | (-1.84, | <0.001 | (0.00, | (0.00, | (-1.85, | <0.001 |
|                    |   |   |   |   |   |   |   |   |   | 31.39)  | 15.54)  | -1.07)  |        | 7.91)  | 2.01)  | -1.01)  |        |
|                    |   |   |   |   |   |   |   |   |   | 21.52   | 18.64   | -0.42   |        | 0.37   | 0.32   | -0.44   |        |
| Eritrea            | — | — | — | — | — | — | — | — | — | (17.60, | (16.37, | (-0.75, | 0.013  | (0.04, | (0.09, | (-0.76, | 0.010  |
|                    |   |   |   |   |   |   |   |   |   | 26.11)  | 21.15)  | -0.09)  |        | 1.55)  | 0.84)  | -0.11)  |        |
|                    |   |   |   |   |   |   |   |   |   | 19.49   | 15.15   | -0.99   |        | 0.33   | 0.26   | -0.90   |        |
| Estonia            | — | — | — | — | — | — | — | — | — | (14.78, | (10.49, | (-1.60, | 0.002  | (0.01, | (0.00, | (-1.47, | 0.002  |
|                    |   |   |   |   |   |   |   |   |   | 25.30)  | 21.54)  | -0.38)  |        | 2.01)  | 2.96)  | -0.33)  |        |
|                    |   |   |   |   |   |   |   |   |   | 10.84   | 16.93   | 1.51    |        | 0.19   | 0.29   | 1.47    |        |
| Eswatini           | — | — | — | — | — | — | — | — | — | (5.55,  | (11.99, | (1.25,  | <0.001 | (0.00, | (0.00, | (0.91,  | <0.001 |

|           |   |   |   |   |   |   |   |   |   |         |         |         |        |        |        |         |        |
|-----------|---|---|---|---|---|---|---|---|---|---------|---------|---------|--------|--------|--------|---------|--------|
|           |   |   |   |   |   |   |   |   |   | 19.34)  | 23.30)  | 1.76)   |        | 4.40)  | 2.37)  | 2.03)   |        |
|           |   |   |   |   |   |   |   |   |   | 14.25   | 7.52    | -2.18   |        | 0.25   | 0.13   | -2.25   |        |
| Ethiopia  | — | — | — | — | — | — | — | — | — | (13.41, | (7.13,  | (-2.35, | <0.001 | (0.15, | (0.08, | (-2.63, | <0.001 |
|           |   |   |   |   |   |   |   |   |   | 15.12)  | 7.92)   | -2.01)  |        | 0.39)  | 0.20)  | -1.87)  |        |
|           |   |   |   |   |   |   |   |   |   | 37.04   | 35.27   | -0.23   |        | 0.65   | 0.62   | -0.23   |        |
| Fiji      | — | — | — | — | — | — | — | — | — | (28.01, | (27.24, | (-0.67, | 0.325  | (0.02, | (0.02, | (-0.79, | 0.417  |
|           |   |   |   |   |   |   |   |   |   | 48.15)  | 44.95)  | 0.22)   |        | 3.88)  | 3.19)  | 0.33)   |        |
|           |   |   |   |   |   |   |   |   |   | 30.01   | 13.22   | -2.83   |        | 0.53   | 0.23   | -2.89   |        |
| Finland   | — | — | — | — | — | — | — | — | — | (26.74, | (10.99, | (-3.37, | <0.001 | (0.18, | (0.03, | (-3.55, | <0.001 |
|           |   |   |   |   |   |   |   |   |   | 33.63)  | 15.80)  | -2.29)  |        | 1.29)  | 0.90)  | -2.22)  |        |
|           |   |   |   |   |   |   |   |   |   | 14.19   | 8.07    | -1.98   |        | 0.25   | 0.14   | -1.98   |        |
| France    | — | — | — | — | — | — | — | — | — | (13.51, | (7.53,  | (-2.47, | <0.001 | (0.17, | (0.08, | (-2.60, | <0.001 |
|           |   |   |   |   |   |   |   |   |   | 14.90)  | 8.64)   | -1.49)  |        | 0.36)  | 0.24)  | -1.36)  |        |
|           |   |   |   |   |   |   |   |   |   | 21.22   | 17.25   | -0.81   |        | 0.37   | 0.30   | -0.81   |        |
| Gabon     | — | — | — | — | — | — | — | — | — | (15.01, | (13.07, | (-1.12, | <0.001 | (0.00, | (0.01, | (-1.12, | <0.001 |
|           |   |   |   |   |   |   |   |   |   | 29.21)  | 22.36)  | -0.50)  |        | 2.97)  | 1.76)  | -0.49)  |        |
|           |   |   |   |   |   |   |   |   |   | 8.53    | 11.03   | 0.91    |        | 0.15   | 0.19   | 1.05    |        |
| Gambia    | — | — | — | — | — | — | — | — | — | (4.57,  | (8.00,  | (-0.32, | 0.148  | (0.00, | (0.00, | (-0.18, | 0.094  |
|           |   |   |   |   |   |   |   |   |   | 14.73)  | 14.90)  | 2.16)   |        | 3.15)  | 1.44)  | 2.28)   |        |
|           |   |   |   |   |   |   |   |   |   | 5.60    | 23.76   | 5.17    |        | 0.10   | 0.42   | 5.17    |        |
| Georgia   | — | — | — | — | — | — | — | — | — | (4.26,  | (20.15, | (3.71,  | <0.001 | (0.00, | (0.08, | (3.86,  | <0.001 |
|           |   |   |   |   |   |   |   |   |   | 7.24)   | 27.90)  | 6.66)   |        | 0.55)  | 1.42)  | 6.50)   |        |
|           |   |   |   |   |   |   |   |   |   | 19.12   | 12.74   | -1.45   |        | 0.33   | 0.22   | -1.46   |        |
| Germany   | — | — | — | — | — | — | — | — | — | (18.44, | (12.16, | (-1.92, | <0.001 | (0.25, | (0.15, | (-2.23, | <0.001 |
|           |   |   |   |   |   |   |   |   |   | 19.82)  | 13.34)  | -0.98)  |        | 0.44)  | 0.32)  | -0.69)  |        |
|           |   |   |   |   |   |   |   |   |   | 8.85    | 7.52    | -0.57   |        | 0.15   | 0.13   | -0.38   |        |
| Ghana     | — | — | — | — | — | — | — | — | — | (7.71,  | (6.84,  | (-1.05, | 0.019  | (0.04, | (0.06, | (-0.85, | 0.116  |
|           |   |   |   |   |   |   |   |   |   | 10.11)  | 8.26)   | -0.09)  |        | 0.42)  | 0.27)  | 0.09)   |        |
|           |   |   |   |   |   |   |   |   |   | 31.08   | 34.21   | 0.25    |        | 0.53   | 0.59   | 0.34    |        |
| Greece    | — | — | — | — | — | — | — | — | — | (28.63, | (31.37, | (-0.20, | 0.270  | (0.26, | (0.28, | (0.01,  | 0.042  |
|           |   |   |   |   |   |   |   |   |   | 33.69)  | 37.27)  | 0.71)   |        | 0.98)  | 1.15)  | 0.66)   |        |
|           |   |   |   |   |   |   |   |   |   | 8.81    | 4.21    | -2.54   |        | 0.16   | 0.08   | -2.82   |        |
| Greenland | — | — | — | — | — | — | — | — | — | (0.46,  | (0.00,  | (-2.83, | <0.001 | (0.00, | (0.00, | (-3.15, | <0.001 |

|               |   |   |   |   |   |   |   |   |         |         |         |        |        |        |         |        |
|---------------|---|---|---|---|---|---|---|---|---------|---------|---------|--------|--------|--------|---------|--------|
|               |   |   |   |   |   |   |   |   | 54.49)  | 52.27)  | -2.24)  |        | 41.95) | 45.40) | -2.50)  |        |
|               |   |   |   |   |   |   |   |   | 16.67   | 13.17   | -0.87   |        | 0.30   | 0.23   | -0.99   |        |
| Grenada       | — | — | — | — | — | — | — | — | (2.70,  | (2.25,  | (-1.69, | 0.038  | (0.00, | (0.00, | (-1.98, | 0.052  |
|               |   |   |   |   |   |   |   |   | 55.87)  | 42.92)  | -0.05)  |        | 28.66) | 21.42) | 0.01)   |        |
|               |   |   |   |   |   |   |   |   | 46.66   | 36.77   | -0.71   |        | 0.81   | 0.65   | -0.64   |        |
| Guam          | — | — | — | — | — | — | — | — | (26.46, | (18.36, | (-1.30, | 0.017  | (0.00, | (0.00, | (-1.26, | 0.043  |
|               |   |   |   |   |   |   |   |   | 76.72)  | 66.13)  | -0.13)  |        | 13.76) | 14.39) | -0.02)  |        |
|               |   |   |   |   |   |   |   |   | 7.70    | 6.91    | -0.38   |        | 0.13   | 0.12   | -0.23   |        |
| Guatemala     | — | — | — | — | — | — | — | — | (6.25,  | (6.06,  | (-1.25, | 0.391  | (0.01, | (0.03, | (-1.30, | 0.684  |
|               |   |   |   |   |   |   |   |   | 9.40)   | 7.85)   | 0.49)   |        | 0.56)  | 0.31)  | 0.86)   |        |
|               |   |   |   |   |   |   |   |   | 8.39    | 10.96   | 0.95    |        | 0.15   | 0.19   | 0.83    |        |
| Guinea        | — | — | — | — | — | — | — | — | (6.58,  | (9.51,  | (0.79,  | <0.001 | (0.01, | (0.05, | (0.53,  | <0.001 |
|               |   |   |   |   |   |   |   |   | 10.56)  | 12.58)  | 1.10)   |        | 0.72)  | 0.54)  | 1.13)   |        |
|               |   |   |   |   |   |   |   |   | 13.00   | 14.21   | 0.31    |        | 0.23   | 0.25   | 0.24    |        |
| Guinea-Bissau | — | — | — | — | — | — | — | — | (7.82,  | (10.46, | (0.22,  | <0.001 | (0.00, | (0.00, | (0.09,  | 0.002  |
|               |   |   |   |   |   |   |   |   | 20.51)  | 18.95)  | 0.40)   |        | 3.43)  | 1.75)  | 0.39)   |        |
|               |   |   |   |   |   |   |   |   | 11.37   | 20.28   | 2.43    |        | 0.20   | 0.36   | 2.47    |        |
| Guyana        | — | — | — | — | — | — | — | — | (6.61,  | (13.56, | (1.83,  | <0.001 | (0.00, | (0.00, | (1.89,  | <0.001 |
|               |   |   |   |   |   |   |   |   | 18.39)  | 29.26)  | 3.03)   |        | 3.23)  | 3.50)  | 3.06)   |        |
|               |   |   |   |   |   |   |   |   | 11.24   | 10.40   | -0.23   |        | 0.20   | 0.18   | -0.33   |        |
| Haiti         | — | — | — | — | — | — | — | — | (9.30,  | (9.15,  | (-0.45, | 0.047  | (0.02, | (0.05, | (-0.60, | 0.020  |
|               |   |   |   |   |   |   |   |   | 13.47)  | 11.78)  | -0.00)  |        | 0.72)  | 0.46)  | -0.05)  |        |
|               |   |   |   |   |   |   |   |   | 3.84    | 2.23    | -1.82   |        | 0.07   | 0.04   | -1.90   |        |
| Honduras      | — | — | — | — | — | — | — | — | (2.53,  | (1.58,  | (-2.17, | <0.001 | (0.00, | (0.00, | (-2.59, | <0.001 |
|               |   |   |   |   |   |   |   |   | 5.61)   | 3.06)   | -1.46)  |        | 0.71)  | 0.31)  | -1.21)  |        |
|               |   |   |   |   |   |   |   |   | 22.41   | 15.60   | -1.25   |        | 0.40   | 0.28   | -1.28   |        |
| Hungary       | — | — | — | — | — | — | — | — | (20.38, | (13.72, | (-1.79, | <0.001 | (0.17, | (0.08, | (-2.03, | 0.001  |
|               |   |   |   |   |   |   |   |   | 24.60)  | 17.69)  | -0.71)  |        | 0.81)  | 0.73)  | -0.52)  |        |
|               |   |   |   |   |   |   |   |   | 19.74   | 11.25   | -1.96   |        | 0.33   | 0.20   | -1.87   |        |
| Iceland       | — | — | — | — | — | — | — | — | (9.68,  | (4.63,  | (-2.27, | <0.001 | (0.00, | (0.00, | (-2.24, | <0.001 |
|               |   |   |   |   |   |   |   |   | 36.03)  | 23.79)  | -1.65)  |        | 8.13)  | 7.81)  | -1.50)  |        |
|               |   |   |   |   |   |   |   |   | 7.19    | 8.49    | 0.66    |        | 0.13   | 0.15   | 0.54    |        |
| India         | — | — | — | — | — | — | — | — | (7.06,  | (8.39,  | (-0.07, | 0.076  | (0.11, | (0.14, | (-0.54, | 0.332  |



|                               |   |   |   |   |   |   |   |   |         |         |         |        |        |        |         |        |
|-------------------------------|---|---|---|---|---|---|---|---|---------|---------|---------|--------|--------|--------|---------|--------|
|                               |   |   |   |   |   |   |   |   | 7.33)   | 8.59)   | 1.40)   |        | 0.15)  | 0.17)  | 1.63)   |        |
|                               |   |   |   |   |   |   |   |   | 6.26    | 7.15    | 0.43    |        | 0.11   | 0.12   | 0.21    |        |
| Indonesia                     | — | — | — | — | — | — | — | — | (6.01,  | (6.93,  | (0.30,  | <0.001 | (0.08, | (0.09, | (-0.58, | 0.601  |
|                               |   |   |   |   |   |   |   |   | 6.53)   | 7.38)   | 0.56)   |        | 0.15)  | 0.16)  | 1.01)   |        |
|                               |   |   |   |   |   |   |   |   | 7.45    | 8.34    | 0.37    |        | 0.13   | 0.14   | 0.22    |        |
| Iran (Islamic<br>Republic of) | — | — | — | — | — | — | — | — | (6.93,  | (7.92,  | (0.14,  | 0.002  | (0.07, | (0.09, | (-0.21, | 0.319  |
|                               |   |   |   |   |   |   |   |   | 8.00)   | 8.78)   | 0.60)   |        | 0.22)  | 0.21)  | 0.66)   |        |
|                               |   |   |   |   |   |   |   |   | 7.88    | 6.06    | -0.89   |        | 0.14   | 0.10   | -0.96   |        |
| Iraq                          | — | — | — | — | — | — | — | — | (6.90,  | (5.55,  | (-1.01, | <0.001 | (0.04, | (0.05, | (-1.48, | <0.001 |
|                               |   |   |   |   |   |   |   |   | 8.97)   | 6.59)   | -0.77)  |        | 0.36)  | 0.20)  | -0.44)  |        |
|                               |   |   |   |   |   |   |   |   | 18.10   | 12.56   | -1.32   |        | 0.31   | 0.22   | -1.21   |        |
| Ireland                       | — | — | — | — | — | — | — | — | (15.02, | (10.25, | (-1.95, | <0.001 | (0.04, | (0.02, | (-1.93, | 0.001  |
|                               |   |   |   |   |   |   |   |   | 21.64)  | 15.26)  | -0.70)  |        | 1.12)  | 0.89)  | -0.49)  |        |
|                               |   |   |   |   |   |   |   |   | 10.69   | 6.81    | -1.54   |        | 0.18   | 0.12   | -1.53   |        |
| Israel                        | — | — | — | — | — | — | — | — | (8.70,  | (5.61,  | (-2.41, | 0.001  | (0.02, | (0.01, | (-2.41, | 0.001  |
|                               |   |   |   |   |   |   |   |   | 13.02)  | 8.19)   | -0.66)  |        | 0.74)  | 0.44)  | -0.64)  |        |
|                               |   |   |   |   |   |   |   |   | 14.93   | 11.13   | -1.05   |        | 0.26   | 0.19   | -1.11   |        |
| Italy                         | — | — | — | — | — | — | — | — | (14.20, | (10.45, | (-1.60, | <0.001 | (0.17, | (0.11, | (-1.78, | 0.001  |
|                               |   |   |   |   |   |   |   |   | 15.68)  | 11.86)  | -0.49)  |        | 0.37)  | 0.32)  | -0.44)  |        |
|                               |   |   |   |   |   |   |   |   | 5.51    | 12.87   | 3.01    |        | 0.09   | 0.22   | 3.05    |        |
| Jamaica                       | — | — | — | — | — | — | — | — | (3.51,  | (10.06, | (1.14,  | 0.001  | (0.00, | (0.01, | (1.18,  | 0.001  |
|                               |   |   |   |   |   |   |   |   | 8.31)   | 16.22)  | 4.91)   |        | 1.23)  | 1.11)  | 4.95)   |        |
|                               |   |   |   |   |   |   |   |   | 9.03    | 15.40   | 1.83    |        | 0.16   | 0.28   | 1.99    |        |
| Japan                         | — | — | — | — | — | — | — | — | (8.64,  | (14.85, | (1.64,  | <0.001 | (0.11, | (0.21, | (1.56,  | <0.001 |
|                               |   |   |   |   |   |   |   |   | 9.42)   | 15.97)  | 2.02)   |        | 0.22)  | 0.37)  | 2.42)   |        |
|                               |   |   |   |   |   |   |   |   | 18.06   | 13.11   | -1.05   |        | 0.31   | 0.22   | -1.28   |        |
| Jordan                        | — | — | — | — | — | — | — | — | (14.96, | (11.77, | (-1.53, | <0.001 | (0.04, | (0.08, | (-2.14, | 0.004  |
|                               |   |   |   |   |   |   |   |   | 21.68)  | 14.56)  | -0.55)  |        | 1.26)  | 0.49)  | -0.42)  |        |
|                               |   |   |   |   |   |   |   |   | 17.14   | 24.63   | 1.19    |        | 0.30   | 0.44   | 1.27    |        |
| Kazakhstan                    | — | — | — | — | — | — | — | — | (15.77, | (23.06, | (0.42,  | 0.003  | (0.14, | (0.25, | (0.16,  | 0.025  |
|                               |   |   |   |   |   |   |   |   | 18.60)  | 26.30)  | 1.98)   |        | 0.55)  | 0.72)  | 2.40)   |        |
|                               |   |   |   |   |   |   |   |   | 11.42   | 12.24   | 0.24    |        | 0.20   | 0.21   | 0.13    |        |
| Kenya                         | — | — | — | — | — | — | — | — | (10.33, | (11.55, | (0.12,  | <0.001 | (0.08, | (0.13, | (-0.02, | 0.095  |

|              |   |   |   |   |   |   |   |   |         |         |         |        |        |        |         |        |
|--------------|---|---|---|---|---|---|---|---|---------|---------|---------|--------|--------|--------|---------|--------|
|              |   |   |   |   |   |   |   |   | 12.60)  | 12.97)  | 0.36)   |        | 0.42)  | 0.33)  | 0.29)   |        |
|              |   |   |   |   |   |   |   |   | 18.83   | 20.09   | 0.22    |        | 0.33   | 0.36   | 0.29    |        |
| Kiribati     | — | — | — | — | — | — | — | — | (3.06,  | (6.04,  | (0.10,  | <0.001 | (0.00, | (0.00, | (0.13,  | 0.001  |
|              |   |   |   |   |   |   |   |   | 63.30)  | 49.53)  | 0.33)   |        | 32.72) | 18.32) | 0.46)   |        |
|              |   |   |   |   |   |   |   |   | 8.88    | 9.00    | -0.05   |        | 0.14   | 0.15   | 0.08    |        |
| Kuwait       | — | — | — | — | — | — | — | — | (6.32,  | (7.13,  | (-1.44, | 0.947  | (0.00, | (0.01, | (-1.61, | 0.931  |
|              |   |   |   |   |   |   |   |   | 12.29)  | 11.30)  | 1.37)   |        | 1.45)  | 0.88)  | 1.78)   |        |
|              |   |   |   |   |   |   |   |   | 7.79    | 6.86    | -0.30   |        | 0.14   | 0.12   | -0.34   |        |
| Kyrgyzstan   | — | — | — | — | — | — | — | — | (6.01,  | (5.51,  | (-1.36, | 0.586  | (0.00, | (0.01, | (-1.91, | 0.672  |
|              |   |   |   |   |   |   |   |   | 9.95)   | 8.46)   | 0.78)   |        | 0.75)  | 0.53)  | 1.25)   |        |
| Lao People's |   |   |   |   |   |   |   |   | 6.46    | 8.41    | 0.95    |        | 0.11   | 0.14   | 0.82    |        |
| Democratic   | — | — | — | — | — | — | — | — | (4.69,  | (7.02,  | (0.75,  | <0.001 | (0.00, | (0.02, | (0.56,  | <0.001 |
| Republic     |   |   |   |   |   |   |   |   | 8.71)   | 9.99)   | 1.15)   |        | 0.84)  | 0.51)  | 1.09)   |        |
|              |   |   |   |   |   |   |   |   | 17.45   | 13.90   | -0.83   |        | 0.30   | 0.24   | -0.77   |        |
| Latvia       | — | — | — | — | — | — | — | — | (13.94, | (10.05, | (-2.24, | 0.249  | (0.02, | (0.00, | (-2.14, | 0.279  |
|              |   |   |   |   |   |   |   |   | 21.61)  | 18.97)  | 0.59)   |        | 1.37)  | 2.16)  | 0.63)   |        |
|              |   |   |   |   |   |   |   |   | 14.89   | 15.66   | 0.20    |        | 0.25   | 0.26   | 0.19    |        |
| Lebanon      | — | — | — | — | — | — | — | — | (11.79, | (13.36, | (0.06,  | 0.004  | (0.01, | (0.05, | (-0.16, | 0.292  |
|              |   |   |   |   |   |   |   |   | 18.61)  | 18.28)  | 0.33)   |        | 1.26)  | 0.86)  | 0.54)   |        |
|              |   |   |   |   |   |   |   |   | 7.95    | 13.77   | 1.91    |        | 0.14   | 0.24   | 2.01    |        |
| Lesotho      | — | — | — | — | — | — | — | — | (5.03,  | (10.62, | (1.58,  | <0.001 | (0.00, | (0.01, | (1.64,  | <0.001 |
|              |   |   |   |   |   |   |   |   | 12.02)  | 17.58)  | 2.24)   |        | 1.74)  | 1.27)  | 2.37)   |        |
|              |   |   |   |   |   |   |   |   | 9.06    | 8.97    | -0.20   |        | 0.16   | 0.16   | -0.14   |        |
| Liberia      | — | — | — | — | — | — | — | — | (5.89,  | (7.10,  | (-0.63, | 0.358  | (0.00, | (0.01, | (-0.74, | 0.657  |
|              |   |   |   |   |   |   |   |   | 13.40)  | 11.19)  | 0.23)   |        | 1.79)  | 0.74)  | 0.47)   |        |
|              |   |   |   |   |   |   |   |   | 8.68    | 10.42   | 0.53    |        | 0.15   | 0.18   | 0.53    |        |
| Libya        | — | — | — | — | — | — | — | — | (6.79,  | (8.89,  | (-0.17, | 0.140  | (0.01, | (0.03, | (-0.32, | 0.224  |
|              |   |   |   |   |   |   |   |   | 10.97)  | 12.14)  | 1.24)   |        | 0.79)  | 0.55)  | 1.40)   |        |
|              |   |   |   |   |   |   |   |   | 18.37   | 21.52   | 0.39    |        | 0.32   | 0.38   | 0.48    |        |
| Lithuania    | — | — | — | — | — | — | — | — | (15.34, | (17.48, | (-0.55, | 0.416  | (0.05, | (0.04, | (-0.46, | 0.318  |
|              |   |   |   |   |   |   |   |   | 21.84)  | 26.33)  | 1.35)   |        | 1.12)  | 1.73)  | 1.42)   |        |
|              |   |   |   |   |   |   |   |   | 22.64   | 11.09   | -2.40   |        | 0.39   | 0.19   | -2.40   |        |
| Luxembourg   | — | — | — | — | — | — | — | — | (13.28, | (5.89,  | (-3.33, | <0.001 | (0.00, | (0.00, | (-3.30, | <0.001 |

|                   |   |   |   |   |   |   |   |   |         |         |         |        |        |        |         |        |
|-------------------|---|---|---|---|---|---|---|---|---------|---------|---------|--------|--------|--------|---------|--------|
|                   |   |   |   |   |   |   |   |   | 37.06)  | 19.72)  | -1.46)  |        | 7.69)  | 5.01)  | -1.50)  |        |
|                   |   |   |   |   |   |   |   |   | 48.53   | 30.38   | -1.66   |        | 0.84   | 0.53   | -1.64   |        |
| Madagascar        | — | — | — | — | — | — | — | — | (45.49, | (28.85, | (-2.25, | <0.001 | (0.48, | (0.34, | (-2.26, | <0.001 |
|                   |   |   |   |   |   |   |   |   | 51.74)  | 31.98)  | -1.08)  |        | 1.38)  | 0.78)  | -1.02)  |        |
|                   |   |   |   |   |   |   |   |   | 14.94   | 15.77   | 0.19    |        | 0.26   | 0.27   | 0.22    |        |
| Malawi            | — | — | — | — | — | — | — | — | (13.06, | (14.41, | (-0.11, | 0.214  | (0.07, | (0.12, | (0.05,  | 0.010  |
|                   |   |   |   |   |   |   |   |   | 17.03)  | 17.23)  | 0.48)   |        | 0.70)  | 0.54)  | 0.39)   |        |
|                   |   |   |   |   |   |   |   |   | 13.44   | 14.90   | 0.47    |        | 0.23   | 0.26   | 0.54    |        |
| Malaysia          | — | — | — | — | — | — | — | — | (12.27, | (14.02, | (-0.50, | 0.342  | (0.10, | (0.15, | (-0.41, | 0.267  |
|                   |   |   |   |   |   |   |   |   | 14.70)  | 15.81)  | 1.45)   |        | 0.45)  | 0.40)  | 1.51)   |        |
|                   |   |   |   |   |   |   |   |   | 10.99   | 6.74    | -1.62   |        | 0.19   | 0.11   | -1.91   |        |
| Maldives          | — | — | — | — | — | — | — | — | (2.72,  | (3.27,  | (-2.42, | <0.001 | (0.00, | (0.00, | (-2.98, | 0.001  |
|                   |   |   |   |   |   |   |   |   | 31.55)  | 13.67)  | -0.82)  |        | 14.98) | 5.14)  | -0.83)  |        |
|                   |   |   |   |   |   |   |   |   | 6.91    | 7.58    | 0.34    |        | 0.12   | 0.13   | 0.28    |        |
| Mali              | — | — | — | — | — | — | — | — | (5.51,  | (6.65,  | (-0.02, | 0.065  | (0.01, | (0.04, | (-0.45, | 0.449  |
|                   |   |   |   |   |   |   |   |   | 8.56)   | 8.61)   | 0.71)   |        | 0.55)  | 0.35)  | 1.01)   |        |
|                   |   |   |   |   |   |   |   |   | 10.20   | 10.54   | 0.05    |        | 0.17   | 0.18   | 0.12    |        |
| Malta             | — | — | — | — | — | — | — | — | (4.19,  | (4.53,  | (-0.51, | 0.872  | (0.00, | (0.00, | (-0.51, | 0.707  |
|                   |   |   |   |   |   |   |   |   | 21.26)  | 22.35)  | 0.60)   |        | 6.52)  | 8.04)  | 0.76)   |        |
|                   |   |   |   |   |   |   |   |   | 35.53   | 42.74   | 0.64    |        | 0.62   | 0.76   | 0.74    |        |
| Marshall Islands  | — | — | — | — | — | — | — | — | (6.64,  | (14.35, | (0.56,  | <0.001 | (0.00, | (0.00, | (0.62,  | <0.001 |
|                   |   |   |   |   |   |   |   |   | 111.40) | 98.47)  | 0.73)   |        | 53.74) | 32.67) | 0.85)   |        |
|                   |   |   |   |   |   |   |   |   | 10.60   | 6.88    | -1.44   |        | 0.19   | 0.12   | -1.52   |        |
| Mauritania        | — | — | — | — | — | — | — | — | (7.37,  | (5.03,  | (-1.57, | <0.001 | (0.00, | (0.00, | (-1.82, | <0.001 |
|                   |   |   |   |   |   |   |   |   | 14.82)  | 9.22)   | -1.30)  |        | 1.62)  | 0.85)  | -1.23)  |        |
|                   |   |   |   |   |   |   |   |   | 11.10   | 12.55   | 0.60    |        | 0.19   | 0.21   | 0.49    |        |
| Mauritius         | — | — | — | — | — | — | — | — | (7.34,  | (8.47,  | (-0.67, | 0.357  | (0.00, | (0.00, | (-1.08, | 0.545  |
|                   |   |   |   |   |   |   |   |   | 16.14)  | 17.99)  | 1.89)   |        | 1.93)  | 2.10)  | 2.09)   |        |
|                   |   |   |   |   |   |   |   |   | 6.67    | 7.39    | 0.44    |        | 0.11   | 0.13   | 0.59    |        |
| Mexico            | — | — | — | — | — | — | — | — | (6.26,  | (7.05,  | (-0.25, | 0.212  | (0.07, | (0.09, | (-0.04, | 0.068  |
|                   |   |   |   |   |   |   |   |   | 7.09)   | 7.74)   | 1.15)   |        | 0.19)  | 0.18)  | 1.23)   |        |
| Micronesia        | — | — | — | — | — | — | — | — | 47.33   | 45.72   | -0.13   |        | 0.84   | 0.80   | -0.18   |        |
| (Federated States | — | — | — | — | — | — | — | — | (21.09, | (20.80, | (-0.17, | <0.001 | (0.00, | (0.00, | (-0.28, | <0.001 |

|             |   |   |   |   |   |   |   |   |         |         |         |        |         |         |         |        |
|-------------|---|---|---|---|---|---|---|---|---------|---------|---------|--------|---------|---------|---------|--------|
| of)         |   |   |   |   |   |   |   |   | 92.09)  | 87.91)  | -0.09)  |        | 23.64)  | 22.24)  | -0.09)  |        |
|             |   |   |   |   |   |   |   |   | 17.63   | 15.31   | -0.48   |        | 0.31    | 0.27    | -0.46   |        |
| Monaco      | — | — | — | — | — | — | — | — | (0.26,  | (0.12,  | (-0.59, | <0.001 | (0.00,  | (0.00,  | (-0.78, | 0.005  |
|             |   |   |   |   |   |   |   |   | 146.21) | 114.00) | -0.38)  |        | 120.28) | 86.77)  | -0.14)  |        |
|             |   |   |   |   |   |   |   |   | 5.24    | 7.69    | 1.35    |        | 0.09    | 0.13    | 1.32    |        |
| Mongolia    | — | — | — | — | — | — | — | — | (3.22,  | (5.77,  | (0.51,  | 0.002  | (0.00,  | (0.00,  | (0.78,  | <0.001 |
|             |   |   |   |   |   |   |   |   | 8.18)   | 10.10)  | 2.20)   |        | 1.42)   | 0.94)   | 1.85)   |        |
|             |   |   |   |   |   |   |   |   | 110.33  | 66.58   | -2.37   |        | 1.92    | 1.17    | -2.32   |        |
| Montenegro  | — | — | — | — | — | — | — | — | (93.09, | (52.42, | (-4.73, | 0.055  | (0.32,  | (0.07,  | (-4.59, | 0.050  |
|             |   |   |   |   |   |   |   |   | 129.89) | 83.58)  | 0.05)   |        | 6.24)   | 5.82)   | -0.01)  |        |
|             |   |   |   |   |   |   |   |   | 7.17    | 5.90    | -0.62   |        | 0.12    | 0.10    | -0.69   |        |
| Morocco     | — | — | — | — | — | — | — | — | (6.42,  | (5.36,  | (-1.07, | 0.008  | (0.04,  | (0.04,  | (-1.30, | 0.030  |
|             |   |   |   |   |   |   |   |   | 7.99)   | 6.48)   | -0.16)  |        | 0.28)   | 0.20)   | -0.07)  |        |
|             |   |   |   |   |   |   |   |   | 12.48   | 20.19   | 1.72    |        | 0.22    | 0.35    | 1.62    |        |
| Mozambique  | — | — | — | — | — | — | — | — | (10.91, | (18.88, | (1.52,  | <0.001 | (0.06,  | (0.20,  | (1.26,  | <0.001 |
|             |   |   |   |   |   |   |   |   | 14.21)  | 21.57)  | 1.92)   |        | 0.57)   | 0.59)   | 1.98)   |        |
|             |   |   |   |   |   |   |   |   | 9.93    | 10.21   | 0.13    |        | 0.17    | 0.17    | 0.00    |        |
| Myanmar     | — | — | — | — | — | — | — | — | (9.25,  | (9.61,  | (-0.07, | 0.205  | (0.09,  | (0.10,  | (0.00,  | <0.001 |
|             |   |   |   |   |   |   |   |   | 10.65)  | 10.84)  | 0.32)   |        | 0.29)   | 0.27)   | 0.00)*  |        |
|             |   |   |   |   |   |   |   |   | 10.33   | 11.54   | 0.42    |        | 0.18    | 0.20    | 0.49    |        |
| Namibia     | — | — | — | — | — | — | — | — | (6.57,  | (8.66,  | (0.05,  | 0.026  | (0.00,  | (0.00,  | (-0.32, | 0.240  |
|             |   |   |   |   |   |   |   |   | 15.61)  | 15.10)  | 0.80)   |        | 2.31)   | 1.25)   | 1.30)   |        |
|             |   |   |   |   |   |   |   |   | 61.15   | 60.65   | -0.03   |        | 1.08    | 1.07    | -0.03   |        |
| Nauru       | — | — | — | — | — | — | — | — | (2.44,  | (3.14,  | (-0.07, | 0.238  | (0.00,  | (0.00,  | (-0.09, | 0.422  |
|             |   |   |   |   |   |   |   |   | 317.49) | 294.66) | 0.02)   |        | 209.71) | 188.83) | 0.04)   |        |
|             |   |   |   |   |   |   |   |   | 5.02    | 5.39    | 0.26    |        | 0.09    | 0.09    | -0.07   |        |
| Nepal       | — | — | — | — | — | — | — | — | (4.26,  | (4.78,  | (0.02,  | 0.032  | (0.02,  | (0.03,  | (-0.87, | 0.864  |
|             |   |   |   |   |   |   |   |   | 5.87)   | 6.06)   | 0.49)   |        | 0.28)   | 0.23)   | 0.74)   |        |
|             |   |   |   |   |   |   |   |   | 11.18   | 5.96    | -2.20   |        | 0.20    | 0.10    | -2.38   |        |
| Netherlands | — | — | — | — | — | — | — | — | (10.04, | (5.08,  | (-2.45, | <0.001 | (0.07,  | (0.02,  | (-2.93, | <0.001 |
|             |   |   |   |   |   |   |   |   | 12.43)  | 6.95)   | -1.95)  |        | 0.43)   | 0.32)   | -1.83)  |        |
|             |   |   |   |   |   |   |   |   | 21.51   | 10.84   | -2.36   |        | 0.37    | 0.19    | -2.29   |        |
| New Zealand | — | — | — | — | — | — | — | — | (18.19, | (8.53,  | (-2.57, | <0.001 | (0.06,  | (0.01,  | (-2.59, | <0.001 |

|                          |   |   |   |   |   |   |   |   |          |          |         |        |         |         |         |        |
|--------------------------|---|---|---|---|---|---|---|---|----------|----------|---------|--------|---------|---------|---------|--------|
|                          |   |   |   |   |   |   |   |   | 25.27)   | 13.59)   | -2.14)  |        | 1.19)   | 0.90)   | -1.99)  |        |
|                          |   |   |   |   |   |   |   |   | 5.53     | 4.80     | -0.69   |        | 0.10    | 0.08    | -0.78   |        |
| Nicaragua                | — | — | — | — | — | — | — | — | (3.78,   | (3.71,   | (-1.19, | 0.006  | (0.00,  | (0.00,  | (-1.57, | 0.053  |
|                          |   |   |   |   |   |   |   |   | 7.85)    | 6.13)    | -0.20)  |        | 0.92)   | 0.44)   | 0.01)   |        |
|                          |   |   |   |   |   |   |   |   | 7.18     | 7.05     | -0.01   |        | 0.13    | 0.12    | -0.21   |        |
| Niger                    | — | — | — | — | — | — | — | — | (5.70,   | (6.16,   | (-0.31, | 0.937  | (0.01,  | (0.03,  | (-0.60, | 0.288  |
|                          |   |   |   |   |   |   |   |   | 8.95)    | 8.05)    | 0.28)   |        | 0.60)   | 0.34)   | 0.18)   |        |
|                          |   |   |   |   |   |   |   |   | 9.64     | 9.02     | -0.22   |        | 0.17    | 0.16    | -0.21   |        |
| Nigeria                  | — | — | — | — | — | — | — | — | (9.15,   | (8.70,   | (-0.40, | 0.017  | (0.11,  | (0.12,  | (-0.77, | 0.464  |
|                          |   |   |   |   |   |   |   |   | 10.15)   | 9.35)    | -0.04)  |        | 0.25)   | 0.21)   | 0.35)   |        |
|                          |   |   |   |   |   |   |   |   | 39.49    | 28.63    | -1.13   |        | 0.70    | 0.50    | -1.17   |        |
| Niue                     | — | — | — | — | — | — | — | — | (0.00,   | (0.00,   | (-1.38, | <0.001 | (0.00,  | (0.00,  | (-1.47, | <0.001 |
|                          |   |   |   |   |   |   |   |   | 1110.07) | 1523.03) | -0.88)  |        | 1032.69 | 1467.97 | -0.87)  |        |
|                          |   |   |   |   |   |   |   |   |          |          |         |        | )       | )       |         |        |
|                          |   |   |   |   |   |   |   |   | 9.92     | 13.14    | 0.97    |        | 0.18    | 0.24    | 1.05    |        |
| North Macedonia          | — | — | — | — | — | — | — | — | (7.14,   | (10.00,  | (-0.52, | 0.204  | (0.00,  | (0.01,  | (-0.50, | 0.186  |
|                          |   |   |   |   |   |   |   |   | 13.43)   | 17.12)   | 2.49)   |        | 1.25)   | 1.63)   | 2.62)   |        |
|                          |   |   |   |   |   |   |   |   | 36.41    | 13.54    | -3.37   |        | 0.65    | 0.24    | -3.37   |        |
| Northern Mariana Islands | — | — | — | — | — | — | — | — | (11.33,  | (0.12,   | (-4.35, | <0.001 | (0.00,  | (0.00,  | (-4.68, | <0.001 |
|                          |   |   |   |   |   |   |   |   | 95.70)   | 103.28)  | -2.39)  |        | 44.19)  | 80.22)  | -2.05)  |        |
|                          |   |   |   |   |   |   |   |   | 18.34    | 8.09     | -2.78   |        | 0.32    | 0.14    | -2.78   |        |
| Norway                   | — | — | — | — | — | — | — | — | (15.57,  | (6.41,   | (-3.27, | <0.001 | (0.06,  | (0.01,  | (-3.33, | <0.001 |
|                          |   |   |   |   |   |   |   |   | 21.49)   | 10.13)   | -2.29)  |        | 1.03)   | 0.73)   | -2.23)  |        |
|                          |   |   |   |   |   |   |   |   | 11.90    | 11.96    | -0.02   |        | 0.20    | 0.20    | -0.06   |        |
| Oman                     | — | — | — | — | — | — | — | — | (9.11,   | (10.15,  | (-0.43, | 0.911  | (0.01,  | (0.04,  | (-0.47, | 0.756  |
|                          |   |   |   |   |   |   |   |   | 15.35)   | 14.11)   | 0.38)   |        | 1.25)   | 0.87)   | 0.34)   |        |
|                          |   |   |   |   |   |   |   |   | 7.28     | 13.70    | 2.26    |        | 0.13    | 0.24    | 2.25    |        |
| Pakistan                 | — | — | — | — | — | — | — | — | (6.89,   | (13.34,  | (1.99,  | <0.001 | (0.08,  | (0.19,  | (2.07,  | <0.001 |
|                          |   |   |   |   |   |   |   |   | 7.69)    | 14.06)   | 2.53)   |        | 0.20)   | 0.29)   | 2.44)   |        |
|                          |   |   |   |   |   |   |   |   | 38.32    | 38.26    | -0.00   |        | 0.67    | 0.67    | -0.01   |        |
| Palau                    | — | — | — | — | — | — | — | — | (2.12,   | (2.72,   | (-0.18, | 0.990  | (0.00,  | (0.00,  | (-0.29, | 0.966  |
|                          |   |   |   |   |   |   |   |   | 182.90)  | 191.07)  | 0.18)   |        | 116.24) | 131.74) | 0.28)   |        |
| Palestine                | — | — | — | — | — | — | — | — | 8.54     | 7.89     | -0.26   | 0.476  | 0.15    | 0.14    | -0.20   | 0.679  |

|                   |   |   |   |   |   |   |   |   |   |                   |                   |                   |        |                 |                 |                   |        |
|-------------------|---|---|---|---|---|---|---|---|---|-------------------|-------------------|-------------------|--------|-----------------|-----------------|-------------------|--------|
|                   |   |   |   |   |   |   |   |   |   | (5.63,<br>12.59)  | (6.21,<br>9.93)   | (-0.97,<br>0.46)  |        | (0.00,<br>1.82) | (0.01,<br>0.70) | (-1.14,<br>0.75)  |        |
|                   |   |   |   |   |   |   |   |   |   | 16.16             | 16.04             | 0.12              |        | 0.28            | 0.28            | 0.01              |        |
| Panama            | — | — | — | — | — | — | — | — | — | (12.68,<br>20.34) | (13.37,<br>19.08) | (-0.61,<br>0.84)  | 0.755  | (0.01,<br>1.41) | (0.04,<br>0.97) | (-0.71,<br>0.74)  | 0.982  |
|                   |   |   |   |   |   |   |   |   |   | 17.29             | 18.36             | 0.21              |        | 0.31            | 0.32            | 0.13              |        |
| Papua New Guinea  | — | — | — | — | — | — | — | — | — | (14.41,<br>20.59) | (16.49,<br>20.38) | (0.08,<br>0.35)   | 0.002  | (0.04,<br>1.09) | (0.12,<br>0.71) | (-0.02,<br>0.27)  | 0.086  |
|                   |   |   |   |   |   |   |   |   |   | 9.76              | 13.46             | 1.27              |        | 0.17            | 0.23            | 1.32              |        |
| Paraguay          | — | — | — | — | — | — | — | — | — | (7.62,<br>12.33)  | (11.66,<br>15.46) | (0.53,<br>2.03)   | 0.001  | (0.01,<br>0.86) | (0.06,<br>0.65) | (-0.16,<br>2.82)  | 0.081  |
|                   |   |   |   |   |   |   |   |   |   | 10.36             | 8.17              | -0.65             |        | 0.18            | 0.14            | -0.63             |        |
| Peru              | — | — | — | — | — | — | — | — | — | (9.38,<br>11.42)  | (7.51,<br>8.88)   | (-1.42,<br>0.13)  | 0.101  | (0.07,<br>0.38) | (0.07,<br>0.26) | (-1.83,<br>0.58)  | 0.306  |
|                   |   |   |   |   |   |   |   |   |   | 3.54              | 13.06             | 4.64              |        | 0.06            | 0.23            | 4.72              |        |
| Philippines       | — | — | — | — | — | — | — | — | — | (3.21,<br>3.90)   | (12.59,<br>13.54) | (3.90,<br>5.39)   | <0.001 | (0.02,<br>0.13) | (0.17,<br>0.30) | (3.70,<br>5.74)   | <0.001 |
|                   |   |   |   |   |   |   |   |   |   | 19.27             | 23.74             | 0.65              |        | 0.33            | 0.42            | 0.73              |        |
| Poland            | — | — | — | — | — | — | — | — | — | (18.31,<br>20.29) | (22.63,<br>24.91) | (0.34,<br>0.96)   | <0.001 | (0.22,<br>0.50) | (0.28,<br>0.61) | (0.32,<br>1.14)   | <0.001 |
|                   |   |   |   |   |   |   |   |   |   | 19.44             | 13.40             | -1.34             |        | 0.33            | 0.23            | -1.24             |        |
| Portugal          | — | — | — | — | — | — | — | — | — | (17.49,<br>21.54) | (11.66,<br>15.34) | (-2.11,<br>-0.56) | 0.001  | (0.12,<br>0.71) | (0.06,<br>0.64) | (-2.59,<br>0.14)  | 0.077  |
|                   |   |   |   |   |   |   |   |   |   | 10.44             | 6.56              | -1.45             |        | 0.19            | 0.12            | -1.46             |        |
| Puerto Rico       | — | — | — | — | — | — | — | — | — | (8.10,<br>13.25)  | (4.61,<br>9.06)   | (-2.16,<br>-0.73) | <0.001 | (0.01,<br>0.93) | (0.00,<br>0.91) | (-2.39,<br>-0.53) | 0.002  |
|                   |   |   |   |   |   |   |   |   |   | 7.15              | 4.79              | -1.36             |        | 0.12            | 0.08            | -1.55             |        |
| Qatar             | — | — | — | — | — | — | — | — | — | (3.60,<br>14.22)  | (3.58,<br>6.69)   | (-1.62,<br>-1.10) | <0.001 | (0.00,<br>5.30) | (0.00,<br>1.34) | (-2.58,<br>-0.50) | 0.004  |
|                   |   |   |   |   |   |   |   |   |   | 9.86              | 6.55              | -1.42             |        | 0.17            | 0.12            | -1.26             |        |
| Republic of Korea | — | — | — | — | — | — | — | — | — | (9.26,<br>10.48)  | (6.07,<br>7.07)   | (-2.17,<br>-0.67) | <0.001 | (0.10,<br>0.27) | (0.06,<br>0.21) | (-2.50,<br>-0.01) | 0.048  |
| Republic of       | — | — | — | — | — | — | — | — | — | 15.37             | 20.94             | 1.00              | 0.050  | 0.26            | 0.36            | 1.03              | 0.047  |

|                                     |   |   |   |   |   |   |   |   |   |                   |                   |                   |        |                  |                  |                   |        |
|-------------------------------------|---|---|---|---|---|---|---|---|---|-------------------|-------------------|-------------------|--------|------------------|------------------|-------------------|--------|
| Moldova                             |   |   |   |   |   |   |   |   |   | (12.87,<br>18.25) | (17.69,<br>24.72) | (-0.00,<br>2.00)  |        | (0.04,<br>0.94)  | (0.06,<br>1.33)  | (0.01,<br>2.06)   |        |
|                                     |   |   |   |   |   |   |   |   |   | 20.25             | 25.02             | 0.76              |        | 0.35             | 0.43             | 0.73              |        |
| Romania                             | — | — | — | — | — | — | — | — | — | (18.94,<br>21.63) | (23.26,<br>26.88) | (-0.02,<br>1.55)  | 0.056  | (0.20,<br>0.58)  | (0.23,<br>0.75)  | (-0.08,<br>1.55)  | 0.078  |
|                                     |   |   |   |   |   |   |   |   |   | 21.84             | 34.75             | 1.72              |        | 0.38             | 0.61             | 1.75              |        |
| Russian Federation                  | — | — | — | — | — | — | — | — | — | (21.32,<br>22.37) | (34.05,<br>35.46) | (0.23,<br>3.23)   | 0.023  | (0.32,<br>0.46)  | (0.52,<br>0.72)  | (0.33,<br>3.19)   | 0.016  |
|                                     |   |   |   |   |   |   |   |   |   | 25.75             | 13.16             | -2.32             |        | 0.45             | 0.23             | -2.29             |        |
| Rwanda                              | — | — | — | — | — | — | — | — | — | (22.96,<br>28.80) | (11.76,<br>14.68) | (-2.47,<br>-2.17) | <0.001 | (0.15,<br>1.04)  | (0.08,<br>0.52)  | (-2.50,<br>-2.08) | <0.001 |
|                                     |   |   |   |   |   |   |   |   |   | 11.47             | 6.18              | -1.21             |        | 0.21             | 0.11             | -1.53             |        |
| Saint Kitts and<br>Nevis            | — | — | — | — | — | — | — | — | — | (0.19,<br>73.16)  | (0.05,<br>47.54)  | (-3.51,<br>1.16)  | 0.314  | (0.00,<br>52.73) | (0.00,<br>36.73) | (-3.58,<br>0.57)  | 0.152  |
|                                     |   |   |   |   |   |   |   |   |   | 16.46             | 14.48             | -0.46             |        | 0.29             | 0.26             | -0.42             |        |
| Saint Lucia                         | — | — | — | — | — | — | — | — | — | (4.13,<br>45.52)  | (4.72,<br>34.36)  | (-1.11,<br>0.19)  | 0.165  | (0.00,<br>19.95) | (0.00,<br>12.27) | (-1.26,<br>0.43)  | 0.332  |
|                                     |   |   |   |   |   |   |   |   |   | 11.38             | 9.74              | -0.46             |        | 0.20             | 0.17             | -0.48             |        |
| Saint Vincent and<br>the Grenadines | — | — | — | — | — | — | — | — | — | (1.56,<br>41.99)  | (1.23,<br>35.27)  | (-1.05,<br>0.14)  | 0.137  | (0.00,<br>23.77) | (0.00,<br>18.76) | (-1.27,<br>0.31)  | 0.230  |
|                                     |   |   |   |   |   |   |   |   |   | 23.81             | 24.19             | 0.04              |        | 0.42             | 0.43             | 0.03              |        |
| Samoa                               | — | — | — | — | — | — | — | — | — | (9.08,<br>52.22)  | (11.00,<br>46.60) | (-0.07,<br>0.14)  | 0.504  | (0.00,<br>17.52) | (0.00,<br>11.95) | (-0.07,<br>0.14)  | 0.532  |
|                                     |   |   |   |   |   |   |   |   |   | 11.72             | 11.63             | -0.02             |        | 0.20             | 0.20             | -0.04             |        |
| San Marino                          | — | — | — | — | — | — | — | — | — | (0.02,<br>108.10) | (0.03,<br>100.20) | (-0.08,<br>0.04)  | 0.522  | (0.00,<br>86.19) | (0.00,<br>78.75) | (-0.25,<br>0.17)  | 0.710  |
|                                     |   |   |   |   |   |   |   |   |   | 8.09              | 10.09             | 0.74              |        | 0.15             | 0.17             | 0.35              |        |
| Sao Tome and<br>Principe            | — | — | — | — | — | — | — | — | — | (0.34,<br>43.74)  | (2.82,<br>25.89)  | (-0.80,<br>2.30)  | 0.349  | (0.00,<br>30.16) | (0.00,<br>10.07) | (-1.45,<br>2.19)  | 0.703  |
|                                     |   |   |   |   |   |   |   |   |   | 4.35              | 6.09              | 1.15              |        | 0.08             | 0.11             | 1.05              |        |
| Saudi Arabia                        | — | — | — | — | — | — | — | — | — | (3.70,<br>5.08)   | (5.66,<br>6.55)   | (0.94,<br>1.36)   | <0.001 | (0.01,<br>0.24)  | (0.06,<br>0.20)  | (0.86,<br>1.24)   | <0.001 |
|                                     |   |   |   |   |   |   |   |   |   | 8.28              | 9.11              | 0.29              | 0.278  | 0.14             | 0.16             | 0.42              | 0.121  |
| Senegal                             | — | — | — | — | — | — | — | — | — |                   |                   |                   |        |                  |                  |                   |        |

|                 |   |   |   |   |   |   |   |   |  |         |         |         |        |        |        |         |        |
|-----------------|---|---|---|---|---|---|---|---|--|---------|---------|---------|--------|--------|--------|---------|--------|
|                 |   |   |   |   |   |   |   |   |  | (6.66,  | (7.99,  | (-0.24, |        | (0.01, | (0.04, | (-0.11, |        |
|                 |   |   |   |   |   |   |   |   |  | 10.20)  | 10.36)  | 0.83)   |        | 0.65)  | 0.42)  | 0.95)   |        |
|                 |   |   |   |   |   |   |   |   |  | 26.13   | 19.50   | -0.97   |        | 0.47   | 0.35   | -1.18   |        |
| Serbia          | — | — | — | — | — | — | — | — |  | (23.86, | (17.38, | (-1.47, | <0.001 | (0.21, | (0.12, | (-1.56, | <0.001 |
|                 |   |   |   |   |   |   |   |   |  | 28.57)  | 21.82)  | -0.48)  |        | 0.91)  | 0.82)  | -0.81)  |        |
|                 |   |   |   |   |   |   |   |   |  | 14.16   | 17.16   | 0.98    |        | 0.25   | 0.29   | 0.88    |        |
| Seychelles      | — | — | — | — | — | — | — | — |  | (1.80,  | (4.47,  | (-0.08, | 0.070  | (0.00, | (0.00, | (-0.14, | 0.092  |
|                 |   |   |   |   |   |   |   |   |  | 53.22)  | 48.62)  | 2.06)   |        | 30.19) | 23.19) | 1.92)   |        |
|                 |   |   |   |   |   |   |   |   |  | 8.43    | 9.66    | 0.52    |        | 0.15   | 0.17   | 0.46    |        |
| Sierra Leone    | — | — | — | — | — | — | — | — |  | (6.23,  | (8.14,  | (0.16,  | 0.004  | (0.00, | (0.03, | (0.13,  | 0.007  |
|                 |   |   |   |   |   |   |   |   |  | 11.17)  | 11.39)  | 0.87)   |        | 0.98)  | 0.57)  | 0.80)   |        |
|                 |   |   |   |   |   |   |   |   |  | 19.30   | 9.05    | -2.68   |        | 0.34   | 0.15   | -2.87   |        |
| Singapore       | — | — | — | — | — | — | — | — |  | (16.32, | (7.33,  | (-3.13, | <0.001 | (0.06, | (0.01, | (-3.42, | <0.001 |
|                 |   |   |   |   |   |   |   |   |  | 22.69)  | 11.15)  | -2.22)  |        | 1.10)  | 0.81)  | -2.31)  |        |
|                 |   |   |   |   |   |   |   |   |  | 21.91   | 21.45   | -0.08   |        | 0.38   | 0.38   | 0.01    |        |
| Slovakia        | — | — | — | — | — | — | — | — |  | (19.22, | (18.69, | (-0.80, | 0.821  | (0.11, | (0.10, | (-0.72, | 0.975  |
|                 |   |   |   |   |   |   |   |   |  | 24.89)  | 24.57)  | 0.64)   |        | 1.00)  | 1.13)  | 0.75)   |        |
|                 |   |   |   |   |   |   |   |   |  | 16.34   | 12.43   | -0.92   |        | 0.29   | 0.22   | -0.98   |        |
| Slovenia        | — | — | — | — | — | — | — | — |  | (12.72, | (9.07,  | (-1.93, | 0.074  | (0.01, | (0.00, | (-1.95, | 0.048  |
|                 |   |   |   |   |   |   |   |   |  | 20.74)  | 16.88)  | 0.09)   |        | 1.59)  | 2.02)  | -0.01)  |        |
|                 |   |   |   |   |   |   |   |   |  | 31.89   | 33.78   | 0.21    |        | 0.57   | 0.60   | 0.21    |        |
| Solomon Islands | — | — | — | — | — | — | — | — |  | (18.26, | (24.06, | (0.13,  | <0.001 | (0.00, | (0.00, | (0.07,  | 0.003  |
|                 |   |   |   |   |   |   |   |   |  | 52.12)  | 46.16)  | 0.29)   |        | 9.34)  | 4.44)  | 0.34)   |        |
|                 |   |   |   |   |   |   |   |   |  | 17.11   | 11.96   | -1.20   |        | 0.30   | 0.21   | -1.20   |        |
| Somalia         | — | — | — | — | — | — | — | — |  | (14.80, | (10.84, | (-1.52, | <0.001 | (0.07, | (0.08, | (-1.38, | <0.001 |
|                 |   |   |   |   |   |   |   |   |  | 19.70)  | 13.17)  | -0.88)  |        | 0.85)  | 0.43)  | -1.03)  |        |
|                 |   |   |   |   |   |   |   |   |  | 27.85   | 15.88   | -2.03   |        | 0.49   | 0.28   | -2.09   |        |
| South Africa    | — | — | — | — | — | — | — | — |  | (26.62, | (15.19, | (-2.92, | <0.001 | (0.34, | (0.19, | (-3.04, | <0.001 |
|                 |   |   |   |   |   |   |   |   |  | 29.13)  | 16.59)  | -1.14)  |        | 0.70)  | 0.39)  | -1.12)  |        |
|                 |   |   |   |   |   |   |   |   |  | 13.04   | 8.85    | -1.24   |        | 0.23   | 0.15   | -1.40   |        |
| South Sudan     | — | — | — | — | — | — | — | — |  | (10.90, | (7.30,  | (-1.69, | <0.001 | (0.03, | (0.02, | (-1.75, | <0.001 |
|                 |   |   |   |   |   |   |   |   |  | 15.52)  | 10.64)  | -0.80)  |        | 0.83)  | 0.59)  | -1.05)  |        |
|                 |   |   |   |   |   |   |   |   |  | 16.90   | 11.01   | -1.66   | <0.001 | 0.29   | 0.19   | -1.67   | <0.001 |
| Spain           | — | — | — | — | — | — | — | — |  |         |         |         |        |        |        |         |        |



|                            |   |   |   |   |   |   |   |   |         |         |         |        |        |        |         |        |
|----------------------------|---|---|---|---|---|---|---|---|---------|---------|---------|--------|--------|--------|---------|--------|
|                            |   |   |   |   |   |   |   |   | (15.97, | (10.25, | (-2.11, |        | (0.18, | (0.10, | (-2.42, |        |
|                            |   |   |   |   |   |   |   |   | 17.86)  | 11.81)  | -1.20)  |        | 0.44)  | 0.33)  | -0.91)  |        |
|                            |   |   |   |   |   |   |   |   | 10.80   | 8.35    | -0.78   |        | 0.19   | 0.14   | -0.99   |        |
| Sri Lanka                  | — | — | — | — | — | — | — | — | (9.76,  | (7.47,  | (-2.84, | 0.467  | (0.07, | (0.05, | (-3.02, | 0.346  |
|                            |   |   |   |   |   |   |   |   | 11.94)  | 9.30)   | 1.33)   |        | 0.39)  | 0.32)  | 1.08)   |        |
|                            |   |   |   |   |   |   |   |   | 8.29    | 8.61    | 0.12    |        | 0.14   | 0.15   | 0.10    |        |
| Sudan                      | — | — | — | — | — | — | — | — | (7.32,  | (7.96,  | (0.01,  | 0.040  | (0.04, | (0.07, | (-0.32, | 0.636  |
|                            |   |   |   |   |   |   |   |   | 9.36)   | 9.30)   | 0.23)   |        | 0.36)  | 0.27)  | 0.52)   |        |
|                            |   |   |   |   |   |   |   |   | 13.77   | 11.90   | -0.49   |        | 0.24   | 0.21   | -0.52   |        |
| Suriname                   | — | — | — | — | — | — | — | — | (6.43,  | (6.28,  | (-2.63, | 0.658  | (0.00, | (0.00, | (-2.38, | 0.588  |
|                            |   |   |   |   |   |   |   |   | 26.36)  | 20.59)  | 1.70)   |        | 7.06)  | 4.08)  | 1.38)   |        |
|                            |   |   |   |   |   |   |   |   | 23.66   | 12.34   | -2.23   |        | 0.41   | 0.22   | -2.20   |        |
| Sweden                     | — | — | — | — | — | — | — | — | (21.30, | (10.76, | (-2.53, | <0.001 | (0.16, | (0.06, | (-2.55, | <0.001 |
|                            |   |   |   |   |   |   |   |   | 26.21)  | 14.11)  | -1.93)  |        | 0.90)  | 0.61)  | -1.85)  |        |
|                            |   |   |   |   |   |   |   |   | 20.37   | 8.05    | -3.28   |        | 0.35   | 0.14   | -3.20   |        |
| Switzerland                | — | — | — | — | — | — | — | — | (18.08, | (6.69,  | (-4.03, | <0.001 | (0.11, | (0.02, | (-4.15, | <0.001 |
|                            |   |   |   |   |   |   |   |   | 22.89)  | 9.65)   | -2.53)  |        | 0.88)  | 0.57)  | -2.25)  |        |
|                            |   |   |   |   |   |   |   |   | 11.28   | 8.69    | -0.94   |        | 0.19   | 0.15   | -0.91   |        |
| Syrian Arab Republic       | — | — | — | — | — | — | — | — | (9.87,  | (7.44,  | (-1.23, | <0.001 | (0.05, | (0.03, | (-1.49, | 0.002  |
|                            |   |   |   |   |   |   |   |   | 12.85)  | 10.14)  | -0.65)  |        | 0.53)  | 0.51)  | -0.32)  |        |
|                            |   |   |   |   |   |   |   |   | 9.16    | 23.89   | 3.26    |        | 0.16   | 0.43   | 3.33    |        |
| Taiwan (Province of China) | — | — | — | — | — | — | — | — | (8.32,  | (22.49, | (2.88,  | <0.001 | (0.07, | (0.26, | (2.93,  | <0.001 |
|                            |   |   |   |   |   |   |   |   | 10.06)  | 25.37)  | 3.65)   |        | 0.32)  | 0.68)  | 3.73)   |        |
|                            |   |   |   |   |   |   |   |   | 4.82    | 5.66    | 0.53    |        | 0.09   | 0.10   | 0.36    |        |
| Tajikistan                 | — | — | — | — | — | — | — | — | (3.47,  | (4.65,  | (0.03,  | 0.039  | (0.00, | (0.01, | (-0.68, | 0.499  |
|                            |   |   |   |   |   |   |   |   | 6.55)   | 6.83)   | 1.03)   |        | 0.67)  | 0.39)  | 1.40)   |        |
|                            |   |   |   |   |   |   |   |   | 9.21    | 13.37   | 1.40    |        | 0.16   | 0.23   | 1.30    |        |
| Thailand                   | — | — | — | — | — | — | — | — | (8.68,  | (12.73, | (0.70,  | <0.001 | (0.10, | (0.15, | (0.46,  | 0.002  |
|                            |   |   |   |   |   |   |   |   | 9.78)   | 14.03)  | 2.11)   |        | 0.25)  | 0.33)  | 2.14)   |        |
|                            |   |   |   |   |   |   |   |   | 3.08    | 5.97    | 2.35    |        | 0.05   | 0.10   | 2.63    |        |
| Timor-Leste                | — | — | — | — | — | — | — | — | (0.95,  | (3.23,  | (1.59,  | <0.001 | (0.00, | (0.00, | (1.82,  | <0.001 |
|                            |   |   |   |   |   |   |   |   | 7.65)   | 10.34)  | 3.11)   |        | 2.97)  | 2.34)  | 3.44)   |        |
|                            |   |   |   |   |   |   |   |   | 10.65   | 12.57   | 0.60    | <0.001 | 0.19   | 0.22   | 0.64    | 0.091  |

|                         |   |   |   |   |   |   |   |   |                    |                    |                   |        |                    |                    |                   |        |
|-------------------------|---|---|---|---|---|---|---|---|--------------------|--------------------|-------------------|--------|--------------------|--------------------|-------------------|--------|
|                         |   |   |   |   |   |   |   |   | (8.06,<br>13.87)   | (10.76,<br>14.62)  | (0.28,<br>0.93)   |        | (0.00,<br>1.17)    | (0.04,<br>0.66)    | (-0.10,<br>1.39)  |        |
|                         |   |   |   |   |   |   |   |   | 21.60              | 22.90              | 0.20              |        | 0.38               | 0.40               | 0.13              |        |
| Tokelau                 | — | — | — | — | — | — | — | — | (0.00,<br>1626.11) | (0.00,<br>1843.17) | (0.17,<br>0.24)   | <0.001 | (0.00,<br>1584.55) | (0.00,<br>1800.60) | (0.07,<br>0.19)   | <0.001 |
|                         |   |   |   |   |   |   |   |   | 15.11              | 21.20              | 1.16              |        | 0.27               | 0.37               | 1.10              |        |
| Tonga                   | — | — | — | — | — | — | — | — | (1.82,<br>58.90)   | (5.04,<br>59.07)   | (0.93,<br>1.40)   | <0.001 | (0.00,<br>34.63)   | (0.00,<br>25.23)   | (0.55,<br>1.65)   | <0.001 |
|                         |   |   |   |   |   |   |   |   | 23.70              | 26.17              | 0.56              |        | 0.41               | 0.46               | 0.59              |        |
| Trinidad and<br>Tobago  | — | — | — | — | — | — | — | — | (17.99,<br>30.70)  | (20.55,<br>33.02)  | (-0.19,<br>1.31)  | 0.141  | (0.01,<br>2.41)    | (0.02,<br>2.50)    | (-0.14,<br>1.31)  | 0.114  |
|                         |   |   |   |   |   |   |   |   | 5.73               | 7.16               | 0.76              |        | 0.10               | 0.12               | 0.60              |        |
| Tunisia                 | — | — | — | — | — | — | — | — | (4.59,<br>7.07)    | (6.11,<br>8.36)    | (0.68,<br>0.84)   | <0.001 | (0.01,<br>0.46)    | (0.02,<br>0.39)    | (0.45,<br>0.75)   | <0.001 |
|                         |   |   |   |   |   |   |   |   | 34.70              | 17.97              | -2.26             |        | 0.62               | 0.32               | -2.27             |        |
| Turkey                  | — | — | — | — | — | — | — | — | (33.62,<br>35.81)  | (17.37,<br>18.60)  | (-2.70,<br>-1.82) | <0.001 | (0.48,<br>0.78)    | (0.24,<br>0.41)    | (-2.70,<br>-1.84) | <0.001 |
|                         |   |   |   |   |   |   |   |   | 5.81               | 19.30              | 4.23              |        | 0.10               | 0.34               | 4.55              |        |
| Turkmenistan            | — | — | — | — | — | — | — | — | (4.11,<br>8.01)    | (16.79,<br>22.09)  | (3.14,<br>5.33)   | <0.001 | (0.00,<br>0.84)    | (0.09,<br>0.92)    | (3.82,<br>5.28)   | <0.001 |
|                         |   |   |   |   |   |   |   |   | 32.81              | 37.78              | 0.46              |        | 0.58               | 0.67               | 0.46              |        |
| Tuvalu                  | — | — | — | — | — | — | — | — | (0.04,<br>308.71)  | (0.69,<br>234.43)  | (0.38,<br>0.54)   | <0.001 | (0.00,<br>247.65)  | (0.00,<br>166.69)  | (0.31,<br>0.61)   | <0.001 |
|                         |   |   |   |   |   |   |   |   | 13.14              | 14.31              | 0.21              |        | 0.23               | 0.25               | 0.24              |        |
| Uganda                  | — | — | — | — | — | — | — | — | (11.76,<br>14.66)  | (13.39,<br>15.28)  | (-0.11,<br>0.53)  | 0.199  | (0.08,<br>0.53)    | (0.14,<br>0.41)    | (-0.12,<br>0.61)  | 0.192  |
|                         |   |   |   |   |   |   |   |   | 9.79               | 33.58              | 4.20              |        | 0.17               | 0.59               | 4.22              |        |
| Ukraine                 | — | — | — | — | — | — | — | — | (9.18,<br>10.42)   | (32.33,<br>34.86)  | (1.33,<br>7.17)   | 0.004  | (0.10,<br>0.28)    | (0.44,<br>0.80)    | (1.31,<br>7.21)   | 0.004  |
|                         |   |   |   |   |   |   |   |   | 12.83              | 16.76              | 0.87              |        | 0.22               | 0.29               | 0.76              |        |
| United Arab<br>Emirates | — | — | — | — | — | — | — | — | (10.17,<br>16.21)  | (15.00,<br>18.74)  | (0.61,<br>1.14)   | <0.001 | (0.01,<br>1.53)    | (0.11,<br>0.80)    | (0.50,<br>1.03)   | <0.001 |

|                    |   |   |   |   |   |   |   |   |   |         |         |         |        |        |        |         |        |
|--------------------|---|---|---|---|---|---|---|---|---|---------|---------|---------|--------|--------|--------|---------|--------|
|                    |   |   |   |   |   |   |   |   |   | 18.24   | 14.06   | -0.95   |        | 0.31   | 0.25   | -0.82   |        |
| United Kingdom     | — | — | — | — | — | — | — | — | — | (17.43, | (13.39, | (-1.33, | <0.001 | (0.21, | (0.17, | (-1.26, | <0.001 |
|                    |   |   |   |   |   |   |   |   |   | 19.07)  | 14.75)  | -0.57)  |        | 0.44)  | 0.36)  | -0.37)  |        |
| United Republic of |   |   |   |   |   |   |   |   |   | 18.97   | 14.93   | -0.81   |        | 0.33   | 0.26   | -0.82   |        |
| Tanzania           | — | — | — | — | — | — | — | — | — | (17.62, | (14.15, | (-1.02, | <0.001 | (0.17, | (0.16, | (-1.09, | <0.001 |
|                    |   |   |   |   |   |   |   |   |   | 20.41)  | 15.74)  | -0.60)  |        | 0.58)  | 0.39)  | -0.55)  |        |
| United States of   |   |   |   |   |   |   |   |   |   | 20.18   | 16.78   | -0.70   |        | 0.35   | 0.30   | -0.61   |        |
| America            | — | — | — | — | — | — | — | — | — | (19.80, | (16.45, | (-1.11, | 0.001  | (0.30, | (0.26, | (-1.06, | 0.008  |
|                    |   |   |   |   |   |   |   |   |   | 20.57)  | 17.12)  | -0.29)  |        | 0.41)  | 0.35)  | -0.16)  |        |
| United States      |   |   |   |   |   |   |   |   |   | 15.90   | 8.80    | -2.02   |        | 0.28   | 0.16   | -2.02   |        |
| Virgin Islands     | — | — | — | — | — | — | — | — | — | (3.22,  | (0.49,  | (-2.49, | <0.001 | (0.00, | (0.00, | (-2.82, | <0.001 |
|                    |   |   |   |   |   |   |   |   |   | 47.98)  | 43.00)  | -1.54)  |        | 22.25) | 28.00) | -1.21)  |        |
| Uruguay            | — | — | — | — | — | — | — | — | — | 19.59   | 19.55   | 0.08    |        | 0.34   | 0.34   | 0.11    |        |
|                    |   |   |   |   |   |   |   |   |   | (16.08, | (16.18, | (-0.75, | 0.854  | (0.04, | (0.04, | (-0.85, | 0.827  |
|                    |   |   |   |   |   |   |   |   |   | 23.64)  | 23.43)  | 0.92)   |        | 1.28)  | 1.22)  | 1.07)   |        |
| Uzbekistan         | — | — | — | — | — | — | — | — | — | 2.70    | 8.80    | 4.11    |        | 0.05   | 0.15   | 3.88    |        |
|                    |   |   |   |   |   |   |   |   |   | (2.21,  | (8.13,  | (3.45,  | <0.001 | (0.00, | (0.08, | (2.98,  | <0.001 |
|                    |   |   |   |   |   |   |   |   |   | 3.28)   | 9.52)   | 4.78)   |        | 0.19)  | 0.27)  | 4.79)   |        |
| Vanuatu            | — | — | — | — | — | — | — | — | — | 33.34   | 41.48   | 0.74    |        | 0.59   | 0.73   | 0.74    |        |
|                    |   |   |   |   |   |   |   |   |   | (14.81, | (25.98, | (0.56,  | <0.001 | (0.00, | (0.00, | (0.43,  | <0.001 |
|                    |   |   |   |   |   |   |   |   |   | 65.01)  | 63.08)  | 0.92)   |        | 16.74) | 8.97)  | 1.05)   |        |
| Venezuela          |   |   |   |   |   |   |   |   |   | 8.23    | 10.43   | 0.83    |        | 0.14   | 0.18   | 1.08    |        |
| (Bolivarian        | — | — | — | — | — | — | — | — | — | (7.33,  | (9.58,  | (0.14,  | 0.019  | (0.05, | (0.09, | (0.28,  | 0.008  |
| Republic of)       |   |   |   |   |   |   |   |   |   | 9.22)   | 11.34)  | 1.52)   |        | 0.33)  | 0.34)  | 1.88)   |        |
| Viet Nam           | — | — | — | — | — | — | — | — | — | 7.52    | 8.44    | 0.40    |        | 0.13   | 0.14   | 0.46    |        |
|                    |   |   |   |   |   |   |   |   |   | (7.05,  | (8.05,  | (0.30,  | <0.001 | (0.07, | (0.10, | (-0.12, | 0.117  |
|                    |   |   |   |   |   |   |   |   |   | 8.03)   | 8.85)   | 0.49)   |        | 0.21)  | 0.21)  | 1.03)   |        |
| Yemen              | — | — | — | — | — | — | — | — | — | 6.56    | 7.69    | 0.62    |        | 0.12   | 0.13   | 0.74    |        |
|                    |   |   |   |   |   |   |   |   |   | (5.47,  | (7.01,  | (0.35,  | <0.001 | (0.02, | (0.06, | (0.42,  | <0.001 |
|                    |   |   |   |   |   |   |   |   |   | 7.81)   | 8.42)   | 0.89)   |        | 0.41)  | 0.26)  | 1.05)   |        |
| Zambia             | — | — | — | — | — | — | — | — | — | 12.63   | 16.40   | 0.90    |        | 0.22   | 0.29   | 1.00    |        |
|                    |   |   |   |   |   |   |   |   |   | (10.67, | (15.04, | (0.60,  | <0.001 | (0.04, | (0.13, | (0.53,  | <0.001 |
|                    |   |   |   |   |   |   |   |   |   | 14.88)  | 17.86)  | 1.19)   |        | 0.76)  | 0.55)  | 1.46)   |        |

|                     |                          |                           |                         |        |                          |                          |                            |        |                            |                             |                            |        |                          |                          |                            |        |
|---------------------|--------------------------|---------------------------|-------------------------|--------|--------------------------|--------------------------|----------------------------|--------|----------------------------|-----------------------------|----------------------------|--------|--------------------------|--------------------------|----------------------------|--------|
| Zimbabwe            | —                        | —                         | —                       | —      | —                        | —                        | —                          | —      | 11.43<br>(9.79,<br>13.29)  | 20.22<br>(18.54,<br>22.02)  | 2.19<br>(1.67,<br>2.71)    | <0.001 | —                        | —                        | —                          | —      |
| <b>Endocarditis</b> |                          |                           |                         |        |                          |                          |                            |        |                            |                             |                            |        |                          |                          |                            |        |
| <b>Overall</b>      |                          |                           |                         |        |                          |                          |                            |        |                            |                             |                            |        |                          |                          |                            |        |
|                     | 4.58<br>(3.86,<br>5.42)  | 6.07<br>(5.66,<br>6.51)   | 1.00<br>(0.94,<br>1.06) | <0.001 | 0.42<br>(0.23,<br>0.75)  | 0.56<br>(0.44,<br>0.71)  | 1.01<br>(0.79,<br>1.23)    | <0.001 | 8.50<br>(7.48,<br>9.64)    | 8.62<br>(8.11,<br>9.16)     | 0.12<br>(-0.02,<br>0.27)   | 0.097  | 0.14<br>(0.04,<br>0.40)  | 0.15<br>(0.09,<br>0.24)  | 0.31<br>(-0.14,<br>0.77)   | 0.173  |
| Albania             | 3.95<br>(2.97,<br>5.17)  | 5.20<br>(3.86,<br>6.87)   | 0.96<br>(0.90,<br>1.03) | <0.001 | 0.46<br>(0.17,<br>1.01)  | 0.55<br>(0.19,<br>1.27)  | 0.67<br>(0.57,<br>0.76)    | <0.001 | 7.33<br>(5.98,<br>8.92)    | 7.52<br>(5.90,<br>9.46)     | 0.14<br>(-0.78,<br>1.06)   | 0.767  | 0.12<br>(0.01,<br>0.52)  | 0.12<br>(0.01,<br>0.64)  | -0.04<br>(-0.84,<br>0.77)  | 0.928  |
| Algeria             | 5.05<br>(4.60,<br>5.53)  | 6.27<br>(5.90,<br>6.66)   | 0.75<br>(0.73,<br>0.78) | <0.001 | 0.68<br>(0.52,<br>0.87)  | 0.80<br>(0.67,<br>0.95)  | 0.55<br>(0.48,<br>0.63)    | <0.001 | 11.67<br>(10.98,<br>12.40) | 7.60<br>(7.19,<br>8.02)     | -1.44<br>(-1.57,<br>-1.30) | <0.001 | 0.20<br>(0.11,<br>0.32)  | 0.13<br>(0.08,<br>0.19)  | -1.47<br>(-2.26,<br>-0.68) | <0.001 |
| American Samoa      | 6.71<br>(0.35,<br>34.58) | 12.28<br>(1.86,<br>43.39) | 2.12<br>(2.05,<br>2.20) | <0.001 | 1.32<br>(0.00,<br>25.61) | 1.78<br>(0.00,<br>26.48) | 1.01<br>(0.97,<br>1.06)    | <0.001 | 25.10<br>(7.79,<br>62.03)  | 63.77<br>(32.80,<br>113.35) | 3.29<br>(2.99,<br>3.59)    | <0.001 | 0.43<br>(0.00,<br>24.06) | 1.09<br>(0.00,<br>25.36) | 3.31<br>(2.97,<br>3.65)    | <0.001 |
| Andorra             | 5.67<br>(0.37,<br>29.37) | 6.96<br>(0.69,<br>30.33)  | 0.71<br>(0.69,<br>0.73) | <0.001 | 1.03<br>(0.00,<br>22.13) | 0.99<br>(0.00,<br>20.95) | -0.13<br>(-0.21,<br>-0.06) | <0.001 | 5.01<br>(0.26,<br>28.25)   | 6.12<br>(0.54,<br>28.77)    | 0.71<br>(0.66,<br>0.76)    | <0.001 | 0.08<br>(0.00,<br>20.58) | 0.11<br>(0.00,<br>19.43) | 1.01<br>(0.43,<br>1.60)    | 0.001  |
| Angola              | 3.03<br>(2.50,<br>3.65)  | 3.85<br>(3.48,<br>4.24)   | 0.87<br>(0.75,<br>1.00) | <0.001 | 0.69<br>(0.45,<br>1.01)  | 0.84<br>(0.67,<br>1.03)  | 0.67<br>(0.52,<br>0.83)    | <0.001 | 17.80<br>(16.46,<br>19.23) | 15.75<br>(14.99,<br>16.54)  | -0.36<br>(-0.86,<br>0.14)  | 0.157  | 0.30<br>(0.15,<br>0.55)  | 0.27<br>(0.17,<br>0.39)  | -0.39<br>(-1.15,<br>0.37)  | 0.309  |
| Antigua and Barbuda | 6.48<br>(0.55,<br>27.67) | 11.00<br>(2.90,<br>29.35) | 1.82<br>(1.76,<br>1.88) | <0.001 | 1.05<br>(0.00,<br>18.49) | 1.41<br>(0.00,<br>14.42) | 1.02<br>(0.97,<br>1.08)    | <0.001 | 22.96<br>(8.24,<br>51.64)  | 23.65<br>(10.41,<br>46.67)  | 0.29<br>(-0.95,<br>1.55)   | 0.645  | 0.39<br>(0.00,<br>17.29) | 0.40<br>(0.00,<br>12.56) | 0.26<br>(-0.97,<br>1.50)   | 0.685  |
| Argentina           | 3.92<br>(3.57,<br>4.29)  | 7.35<br>(6.95,<br>7.76)   | 2.19<br>(2.15,<br>2.23) | <0.001 | 0.78<br>(0.63,<br>0.95)  | 1.09<br>(0.94,<br>1.26)  | 1.20<br>(1.16,<br>1.24)    | <0.001 | 13.18<br>(12.54,<br>13.84) | 16.46<br>(15.86,<br>17.07)  | 0.79<br>(0.47,<br>1.11)    | <0.001 | 0.22<br>(0.15,<br>0.32)  | 0.28<br>(0.21,<br>0.37)  | 0.82<br>(0.65,<br>1.00)    | <0.001 |
| Armenia             | 3.42<br>(2.53,<br>4.53)  | 4.23<br>(3.10,<br>5.69)   | 0.74<br>(0.69,<br>0.79) | <0.001 | 0.36<br>(0.12,<br>0.85)  | 0.43<br>(0.13,<br>1.11)  | 0.64<br>(0.50,<br>0.77)    | <0.001 | 3.30<br>(2.43,<br>4.39)    | 3.87<br>(2.82,<br>5.25)     | 0.57<br>(-0.24,<br>1.39)   | 0.168  | 0.06<br>(0.00,<br>0.39)  | 0.07<br>(0.00,<br>0.59)  | 0.38<br>(-1.19,<br>1.97)   | 0.638  |
| Australia           | 5.38                     | 6.52                      | 0.66                    | <0.001 | 1.32                     | 1.13                     | -0.55                      | <0.001 | 5.93                       | 8.05                        | 1.09                       | <0.001 | 0.10                     | 0.14                     | 1.17                       | 0.003  |

|            |        |        |        |        |        |        |         |        |         |         |         |        |        |        |         |        |
|------------|--------|--------|--------|--------|--------|--------|---------|--------|---------|---------|---------|--------|--------|--------|---------|--------|
|            | (4.85, | (5.99, | (0.61, |        | (1.06, | (0.92, | (-0.65, |        | (5.37,  | (7.46,  | (0.52,  |        | (0.04, | (0.07, | (0.40,  |        |
|            | 5.96)  | 7.09)  | 0.70)  |        | 1.62)  | 1.38)  | -0.44)  |        | 6.54)   | 8.67)   | 1.67)   |        | 0.21)  | 0.24)  | 1.94)   |        |
|            | 5.30   | 6.29   | 0.59   |        | 0.93   | 0.87   | -0.23   |        | 5.70    | 4.45    | -0.88   |        | 0.10   | 0.07   | -0.90   |        |
| Austria    | (4.51, | (5.40, | (0.42, | <0.001 | (0.62, | (0.56, | (-0.43, | 0.019  | (4.88,  | (3.72,  | (-1.51, | 0.007  | (0.02, | (0.01, | (-1.45, | 0.001  |
|            | 6.20)  | 7.30)  | 0.75)  |        | 1.35)  | 1.31)  | -0.04)  |        | 6.63)   | 5.30)   | -0.24)  |        | 0.30)  | 0.29)  | -0.35)  |        |
|            | 3.07   | 3.75   | 0.70   |        | 0.28   | 0.33   | 0.57    |        | 4.57    | 5.09    | 0.28    |        | 0.08   | 0.08   | -0.14   |        |
| Azerbaijan | (2.48, | (3.19, | (0.64, | <0.001 | (0.12, | (0.18, | (0.34,  | <0.001 | (3.85,  | (4.44,  | (-0.44, | 0.445  | (0.01, | (0.02, | (-1.05, | 0.770  |
|            | 3.77)  | 4.39)  | 0.76)  |        | 0.55)  | 0.57)  | 0.81)   |        | 5.39)   | 5.82)   | 1.02)   |        | 0.27)  | 0.25)  | 0.79)   |        |
|            | 7.24   | 12.66  | 1.93   |        | 0.95   | 1.40   | 1.34    |        | 43.93   | 47.57   | 0.28    |        | 0.75   | 0.81   | 0.28    |        |
| Bahamas    | (3.16, | (7.64, | (1.87, | <0.001 | (0.03, | (0.18, | (1.23,  | <0.001 | (32.55, | (37.24, | (-0.30, | 0.340  | (0.01, | (0.04, | (-0.32, | 0.356  |
|            | 14.48) | 19.82) | 1.98)  |        | 5.53)  | 5.03)  | 1.44)   |        | 58.21)  | 59.96)  | 0.87)   |        | 5.22)  | 4.09)  | 0.89)   |        |
|            | 6.06   | 7.64   | 0.81   |        | 0.81   | 0.96   | 0.57    |        | 6.74    | 4.77    | -1.22   |        | 0.11   | 0.08   | -1.03   |        |
| Bahrain    | (3.40, | (5.53, | (0.76, | <0.001 | (0.10, | (0.34, | (0.42,  | <0.001 | (3.84,  | (3.14,  | (-1.80, | <0.001 | (0.00, | (0.00, | (-2.04, | 0.046  |
|            | 10.30) | 10.41) | 0.87)  |        | 3.41)  | 2.34)  | 0.73)   |        | 11.23)  | 7.08)   | -0.64)  |        | 2.36)  | 1.09)  | -0.02)  |        |
|            | 2.97   | 3.99   | 1.03   |        | 0.40   | 0.51   | 0.87    |        | 15.03   | 11.96   | -0.73   |        | 0.25   | 0.20   | -0.67   |        |
| Bangladesh | (2.80, | (3.84, | (0.96, | <0.001 | (0.34, | (0.46, | (0.76,  | <0.001 | (14.65, | (11.70, | (-1.20, | 0.002  | (0.20, | (0.17, | (-1.11, | 0.003  |
|            | 3.14)  | 4.15)  | 1.10)  |        | 0.47)  | 0.57)  | 0.98)   |        | 15.42)  | 12.23)  | -0.26)  |        | 0.31)  | 0.24)  | -0.23)  |        |
|            | 8.41   | 13.09  | 1.51   |        | 1.45   | 1.86   | 0.85    |        | 39.66   | 35.90   | -0.50   |        | 0.67   | 0.61   | -0.46   |        |
| Barbados   | (3.89, | (7.02, | (1.45, | <0.001 | (0.12, | (0.20, | (0.77,  | <0.001 | (28.75, | (25.17, | (-1.21, | 0.169  | (0.01, | (0.00, | (-1.15, | 0.194  |
|            | 15.96) | 22.45) | 1.58)  |        | 6.15)  | 7.25)  | 0.94)   |        | 53.42)  | 49.81)  | 0.21)   |        | 4.83)  | 5.17)  | 0.23)   |        |
|            | 5.52   | 8.68   | 1.57   |        | 0.58   | 0.85   | 1.32    |        | 11.26   | 23.56   | 2.47    |        | 0.19   | 0.41   | 2.57    |        |
| Belarus    | (4.82, | (7.68, | (1.37, | <0.001 | (0.37, | (0.55, | (1.25,  | <0.001 | (10.25, | (21.93, | (1.87,  | <0.001 | (0.08, | (0.22, | (1.88,  | <0.001 |
|            | 6.30)  | 9.80)  | 1.77)  |        | 0.88)  | 1.27)  | 1.40)   |        | 12.35)  | 25.29)  | 3.08)   |        | 0.39)  | 0.72)  | 3.28)   |        |
|            | 5.29   | 7.79   | 1.32   |        | 1.22   | 1.30   | 0.20    |        | 3.57    | 5.33    | 1.34    |        | 0.06   | 0.09   | 1.45    |        |
| Belgium    | (4.58, | (6.90, | (1.27, | <0.001 | (0.89, | (0.95, | (0.10,  | <0.001 | (2.99,  | (4.60,  | (1.03,  | <0.001 | (0.01, | (0.02, | (0.79,  | <0.001 |
|            | 6.09)  | 8.77)  | 1.38)  |        | 1.64)  | 1.74)  | 0.31)   |        | 4.23)   | 6.14)   | 1.64)   |        | 0.22)  | 0.27)  | 2.11)   |        |
|            | 4.90   | 8.43   | 1.92   |        | 0.55   | 0.86   | 1.56    |        | 7.60    | 12.82   | 1.70    |        | 0.13   | 0.22   | 1.69    |        |
| Belize     | (1.09, | (4.67, | (1.85, | <0.001 | (0.00, | (0.06, | (1.49,  | <0.001 | (2.48,  | (8.04,  | (1.32,  | <0.001 | (0.00, | (0.00, | (1.22,  | <0.001 |
|            | 14.91) | 14.12) | 1.99)  |        | 8.28)  | 3.86)  | 1.64)   |        | 18.69)  | 19.49)  | 2.07)   |        | 7.58)  | 2.78)  | 2.17)   |        |
|            | 3.45   | 4.08   | 0.62   |        | 0.71   | 0.80   | 0.40    |        | 17.01   | 13.07   | -0.89   |        | 0.29   | 0.22   | -0.98   |        |
| Benin      | (2.61, | (3.52, | (0.52, | <0.001 | (0.36, | (0.56, | (0.32,  | <0.001 | (15.02, | (12.02, | (-1.09, | <0.001 | (0.09, | (0.10, | (-1.28, | <0.001 |
|            | 4.50)  | 4.71)  | 0.72)  |        | 1.28)  | 1.11)  | 0.49)   |        | 19.20)  | 14.19)  | -0.68)  |        | 0.73)  | 0.42)  | -0.68)  |        |
| Bermuda    | 6.76   | 11.22  | 1.74   | <0.001 | 1.13   | 1.50   | 0.96    | <0.001 | 19.52   | 15.41   | -0.86   | <0.001 | 0.33   | 0.26   | -0.88   | <0.001 |

|                                  |               |               |                |        |               |               |               |        |                |                |                |               |               |                |                |        |
|----------------------------------|---------------|---------------|----------------|--------|---------------|---------------|---------------|--------|----------------|----------------|----------------|---------------|---------------|----------------|----------------|--------|
|                                  | (0.66, 30.67) | (1.46, 43.92) | (1.68, 1.81)   |        | (0.00, 22.07) | (0.00, 28.78) | (0.90, 1.02)  |        | (6.41, 48.73)  | (2.98, 50.26)  | (-1.15, -0.57) | (0.00, 20.75) | (0.00, 26.64) | (-1.19, -0.56) |                |        |
|                                  | 2.89          | 4.18          | 1.29           |        | 0.31          | 0.43          | 1.15          |        | 7.66           | 8.49           | 0.33           | 0.13          | 0.14          | 0.20           |                |        |
| Bhutan                           | (1.14, 6.29)  | (2.32, 6.98)  | (1.21, 1.37)   | <0.001 | (0.00, 2.61)  | (0.03, 1.91)  | (1.00, 1.30)  | <0.001 | (4.48, 12.43)  | (5.73, 12.17)  | (0.24, 0.43)   | <0.001        | (0.00, 2.33)  | (0.00, 1.42)   | (-0.19, 0.59)  | 0.312  |
| Bolivia (Plurinational State of) | (2.70, 4.25)  | (5.45, 6.88)  | (2.00, 2.15)   | <0.001 | (0.18, 0.73)  | (0.43, 0.91)  | (1.62, 1.99)  | <0.001 | (13.93, 17.15) | (12.43, 14.54) | (-0.61, -0.35) | <0.001        | (0.09, 0.57)  | (0.11, 0.41)   | (-0.66, -0.37) | <0.001 |
| Bosnia and Herzegovina           | 4.67          | 5.65          | 0.69           |        | 0.47          | 0.54          | 0.50          |        | 3.60           | 3.70           | 0.01           |               | 0.06          | 0.06           | -0.09          |        |
|                                  | (3.76, 5.75)  | (4.31, 7.30)  | (0.52, 0.86)   | <0.001 | (0.22, 0.89)  | (0.19, 1.25)  | (0.19, 0.82)  | 0.002  | (2.81, 4.55)   | (2.63, 5.08)   | (-0.52, 0.53)  | 0.978         | (0.00, 0.31)  | (0.00, 0.54)   | (-0.44, 0.27)  | 0.629  |
| Botswana                         | 5.45          | 6.07          | 0.35           |        | 1.21          | 1.27          | 0.14          |        | 32.86          | 30.04          | -0.33          |               | 0.55          | 0.50           | -0.35          |        |
|                                  | (3.56, 8.09)  | (4.68, 7.76)  | (0.29, 0.42)   | <0.001 | (0.45, 2.78)  | (0.68, 2.17)  | (0.09, 0.19)  | <0.001 | (27.89, 38.55) | (26.83, 33.54) | (-0.67, 0.00)  | 0.051         | (0.09, 1.89)  | (0.17, 1.15)   | (-0.62, -0.08) | 0.011  |
| Brazil                           | 4.83          | 7.30          | 1.41           |        | 0.70          | 0.98          | 1.13          |        | 24.12          | 21.06          | -0.46          |               | 0.40          | 0.35           | -0.46          |        |
|                                  | (4.65, 5.01)  | (7.12, 7.48)  | (1.33, 1.50)   | <0.001 | (0.64, 0.77)  | (0.91, 1.05)  | (0.95, 1.31)  | <0.001 | (23.73, 24.51) | (20.76, 21.37) | (-0.69, -0.23) | <0.001        | (0.35, 0.45)  | (0.31, 0.39)   | (-0.72, -0.21) | <0.001 |
| Brunei Darussalam                | 5.54          | 6.40          | 0.50           |        | 0.83          | 0.86          | 0.11          |        | 17.41          | 10.47          | -1.73          |               | 0.29          | 0.18           | -1.60          |        |
|                                  | (2.19, 11.67) | (3.42, 11.11) | (0.48, 0.52)   | <0.001 | (0.02, 4.78)  | (0.08, 3.64)  | (0.07, 0.15)  | <0.001 | (10.84, 26.61) | (6.56, 16.04)  | (-2.09, -1.36) | <0.001        | (0.00, 3.86)  | (0.00, 2.54)   | (-2.33, -0.85) | <0.001 |
| Bulgaria                         | 4.52          | 6.44          | 1.23           |        | 0.53          | 0.66          | 0.77          |        | 12.60          | 18.28          | 1.24           |               | 0.21          | 0.31           | 1.30           |        |
|                                  | (3.79, 5.35)  | (5.37, 7.69)  | (1.18, 1.29)   | <0.001 | (0.30, 0.86)  | (0.35, 1.16)  | (0.69, 0.86)  | <0.001 | (11.36, 13.94) | (16.44, 20.29) | (0.99, 1.48)   | <0.001        | (0.08, 0.45)  | (0.11, 0.70)   | (1.02, 1.59)   | <0.001 |
| Burkina Faso                     | 3.20          | 3.81          | 0.68           |        | 0.57          | 0.63          | 0.38          |        | 13.98          | 13.38          | -0.10          |               | 0.24          | 0.23           | 0.04           |        |
|                                  | (2.60, 3.92)  | (3.40, 4.26)  | (0.55, 0.82)   | <0.001 | (0.33, 0.93)  | (0.47, 0.83)  | (0.23, 0.52)  | <0.001 | (12.62, 15.45) | (12.58, 14.23) | (-0.47, 0.28)  | 0.610         | (0.09, 0.52)  | (0.13, 0.37)   | (-0.72, 0.81)  | 0.918  |
| Burundi                          | 4.66          | 4.01          | -0.48          |        | 0.81          | 0.83          | 0.09          |        | 36.76          | 21.33          | -1.86          |               | 0.61          | 0.36           | -1.83          |        |
|                                  | (3.76, 5.73)  | (3.45, 4.65)  | (-0.58, -0.38) | <0.001 | (0.46, 1.34)  | (0.59, 1.16)  | (-0.04, 0.22) | 0.184  | (34.12, 39.56) | (19.98, 22.75) | (-2.12, -1.59) | <0.001        | (0.32, 1.10)  | (0.20, 0.59)   | (-2.24, -1.42) | <0.001 |
| Cabo Verde                       | 3.39          | 4.60          | 1.09           |        | 0.70          | 0.83          | 0.62          |        | 8.20           | 8.10           | -0.04          |               | 0.14          | 0.13           | -0.06          |        |
|                                  | (0.92, 9.79)  | (2.33, 8.21)  | (0.96, 1.22)   | <0.001 | (0.01, 5.99)  | (0.11, 3.04)  | (0.45, 0.80)  | <0.001 | (3.71, 16.41)  | (4.97, 12.53)  | (-0.42, 0.34)  | 0.830         | (0.00, 5.16)  | (0.00, 1.87)   | (-0.48, 0.36)  | 0.792  |
| Cambodia                         | 3.75          | 4.88          | 0.93           |        | 0.56          | 0.70          | 0.78          | <0.001 | 17.67          | 18.84          | 0.24           | <0.001        | 0.30          | 0.32           | 0.23           | <0.001 |

|                          |               |               |                |        |               |               |                |        |                |                |                |        |               |               |                |        |
|--------------------------|---------------|---------------|----------------|--------|---------------|---------------|----------------|--------|----------------|----------------|----------------|--------|---------------|---------------|----------------|--------|
|                          | (3.14, 4.44)  | (4.38, 5.43)  | (0.83, 1.04)   |        | (0.34, 0.87)  | (0.52, 0.92)  | (0.68, 0.88)   |        | (16.31, 19.12) | (17.85, 19.88) | (0.16, 0.32)   |        | (0.15, 0.56)  | (0.20, 0.48)  | (0.14, 0.32)   |        |
|                          | 3.48          | 4.23          | 0.71           |        | 0.60          | 0.73          | 0.72           |        | 18.47          | 15.78          | -0.59          |        | 0.32          | 0.27          | -0.66          |        |
| Cameroon                 | (2.90, 4.15)  | (3.86, 4.62)  | (0.52, 0.89)   | <0.001 | (0.37, 0.93)  | (0.58, 0.91)  | (0.58, 0.87)   | <0.001 | (17.04, 19.99) | (15.05, 16.54) | (-0.88, -0.30) | <0.001 | (0.15, 0.58)  | (0.18, 0.39)  | (-1.07, -0.24) | 0.002  |
|                          | 5.77          | 6.27          | 0.30           |        | 5.26          | 3.47          | -1.42          |        | 3.86           | 8.06           | 2.65           |        | 0.06          | 0.13          | 2.73           |        |
| Canada                   | (5.34, 6.24)  | (5.82, 6.74)  | (0.20, 0.39)   | <0.001 | (4.85, 5.69)  | (3.14, 3.82)  | (-1.49, -1.34) | <0.001 | (3.52, 4.24)   | (7.56, 8.58)   | (2.20, 3.11)   | <0.001 | (0.02, 0.13)  | (0.08, 0.22)  | (2.08, 3.38)   | <0.001 |
| Central African Republic | 3.13          | 3.35          | 0.29           |        | 0.55          | 0.55          | 0.06           |        | 19.51          | 17.92          | -0.31          |        | 0.33          | 0.30          | -0.27          |        |
|                          | (2.12, 4.49)  | (2.60, 4.27)  | (0.18, 0.40)   | <0.001 | (0.19, 1.32)  | (0.27, 1.00)  | (-0.06, 0.18)  | 0.347  | (16.82, 22.55) | (16.09, 19.91) | (-0.47, -0.15) | <0.001 | (0.07, 1.01)  | (0.11, 0.68)  | (-0.46, -0.09) | 0.004  |
|                          | 3.22          | 3.67          | 0.53           |        | 0.51          | 0.56          | 0.34           |        | 15.23          | 11.48          | -0.87          |        | 0.26          | 0.19          | -0.97          |        |
| Chad                     | (2.48, 4.12)  | (3.17, 4.22)  | (0.42, 0.63)   | <0.001 | (0.25, 0.96)  | (0.38, 0.82)  | (0.23, 0.45)   | <0.001 | (13.52, 17.11) | (10.56, 12.47) | (-1.18, -0.55) | <0.001 | (0.08, 0.63)  | (0.09, 0.37)  | (-1.26, -0.68) | <0.001 |
|                          | 4.27          | 8.09          | 2.23           |        | 0.85          | 1.26          | 1.33           |        | 6.90           | 9.75           | 1.25           |        | 0.12          | 0.17          | 1.33           |        |
| Chile                    | (3.75, 4.85)  | (7.43, 8.79)  | (2.13, 2.32)   | <0.001 | (0.63, 1.13)  | (1.01, 1.56)  | (1.28, 1.38)   | <0.001 | (6.23, 7.64)   | (9.03, 10.51)  | (0.79, 1.71)   | <0.001 | (0.04, 0.25)  | (0.08, 0.30)  | (0.62, 2.04)   | <0.001 |
|                          | 7.67          | 5.38          | -1.17          |        | 0.85          | 0.79          | -0.22          |        | 8.12           | 3.78           | -2.58          |        | 0.13          | 0.06          | -2.61          |        |
| China                    | (7.60, 7.74)  | (5.32, 5.45)  | (-1.46, -0.89) | <0.001 | (0.83, 0.87)  | (0.77, 0.82)  | (-0.32, -0.13) | <0.001 | (8.05, 8.20)   | (3.73, 3.84)   | (-3.10, -2.06) | <0.001 | (0.12, 0.14)  | (0.06, 0.07)  | (-4.20, -1.00) | 0.002  |
|                          | 4.49          | 7.03          | 1.57           |        | 0.87          | 1.16          | 1.01           |        | 14.32          | 18.23          | 0.92           |        | 0.24          | 0.30          | 0.82           |        |
| Colombia                 | (4.13, 4.86)  | (6.65, 7.41)  | (1.47, 1.67)   | <0.001 | (0.72, 1.04)  | (1.01, 1.32)  | (0.90, 1.13)   | <0.001 | (13.69, 14.97) | (17.63, 18.84) | (0.69, 1.16)   | <0.001 | (0.16, 0.34)  | (0.23, 0.39)  | (0.30, 1.35)   | 0.002  |
|                          | 4.64          | 4.89          | 0.18           |        | 1.13          | 1.22          | 0.27           |        | 29.67          | 22.03          | -1.04          |        | 0.50          | 0.37          | -1.06          |        |
| Comoros                  | (1.90, 9.87)  | (2.69, 8.25)  | (0.14, 0.22)   | <0.001 | (0.11, 4.95)  | (0.30, 3.40)  | (0.20, 0.34)   | <0.001 | (21.64, 39.96) | (16.94, 28.22) | (-3.72, 1.72)  | 0.458  | (0.00, 4.00)  | (0.01, 2.09)  | (-3.61, 1.55)  | 0.422  |
|                          | 3.98          | 4.01          | 0.03           |        | 0.86          | 0.90          | 0.14           |        | 24.23          | 17.28          | -1.20          |        | 0.41          | 0.29          | -1.04          |        |
| Congo                    | (2.77, 5.60)  | (3.20, 4.97)  | (-0.05, 0.10)  | 0.487  | (0.36, 1.79)  | (0.54, 1.42)  | (0.01, 0.27)   | 0.033  | (21.01, 27.84) | (15.53, 19.17) | (-1.83, -0.56) | <0.001 | (0.09, 1.20)  | (0.11, 0.64)  | (-1.54, -0.54) | <0.001 |
|                          | 8.51          | 10.25         | 0.62           |        | 1.33          | 1.55          | 0.52           |        | 36.99          | 29.84          | -0.72          |        | 0.62          | 0.50          | -0.72          |        |
| Cook Islands             | (0.03, 75.45) | (0.03, 86.03) | (0.57, 0.67)   | <0.001 | (0.00, 62.89) | (0.00, 69.62) | (0.41, 0.62)   | <0.001 | (6.68, 120.50) | (2.83, 119.13) | (-0.80, -0.64) | <0.001 | (0.00, 61.67) | (0.00, 67.56) | (-0.84, -0.60) | <0.001 |
| Costa Rica               | 5.50          | 9.72          | 1.98           | <0.001 | 0.88          | 1.31          | 1.35           | <0.001 | 14.04          | 21.55          | 1.49           | <0.001 | 0.24          | 0.37          | 1.64           | <0.001 |

|                                       |               |               |              |        |               |               |               |        |                |                |                |              |               |               |                |        |
|---------------------------------------|---------------|---------------|--------------|--------|---------------|---------------|---------------|--------|----------------|----------------|----------------|--------------|---------------|---------------|----------------|--------|
|                                       | (4.27, 6.99)  | (8.38, 11.21) | (1.94, 2.03) |        | (0.44, 1.60)  | (0.85, 1.95)  | (1.31, 1.40)  |        | (12.03, 16.31) | (19.54, 23.72) | (0.92, 2.06)   | (0.05, 0.74) | (0.15, 0.77)  | (0.92, 2.37)  |                |        |
|                                       | 3.61          | 4.05          | 0.46         |        | 0.68          | 0.73          | 0.29          |        | 18.80          | 14.08          | -1.01          | 0.32         | 0.24          | -0.98         |                |        |
| Cote d'Ivoire                         | (3.08, 4.22)  | (3.68, 4.46)  | (0.35, 0.56) | <0.001 | (0.46, 0.98)  | (0.57, 0.91)  | (0.20, 0.38)  | <0.001 | (17.53, 20.14) | (13.37, 14.82) | (-1.17, -0.85) | <0.001       | (0.17, 0.55)  | (0.15, 0.35)  | (-1.25, -0.70) | <0.001 |
|                                       | 5.18          | 5.48          | 0.18         |        | 0.57          | 0.56          | -0.06         |        | 4.21           | 4.33           | 0.08           | 0.07         | 0.07          | 0.02          |                |        |
| Croatia                               | (4.19, 6.34)  | (4.29, 6.94)  | (0.14, 0.22) | <0.001 | (0.28, 1.05)  | (0.23, 1.19)  | (-0.28, 0.16) | 0.569  | (3.34, 5.27)   | (3.29, 5.63)   | (-0.43, 0.59)  | 0.760        | (0.00, 0.36)  | (0.00, 0.50)  | (-0.80, 0.86)  | 0.957  |
|                                       | 5.74          | 9.49          | 1.76         |        | 0.80          | 1.11          | 1.14          |        | 11.10          | 10.76          | -0.27          | 0.19         | 0.18          | -0.21         |                |        |
| Cuba                                  | (5.07, 6.48)  | (8.52, 10.55) | (1.69, 1.83) | <0.001 | (0.56, 1.10)  | (0.79, 1.51)  | (1.05, 1.22)  | <0.001 | (10.15, 12.11) | (9.72, 11.87)  | (-0.44, -0.11) | 0.001        | (0.08, 0.37)  | (0.07, 0.39)  | (-0.41, -0.01) | 0.042  |
|                                       | 4.52          | 6.28          | 1.12         |        | 0.90          | 0.95          | 0.17          |        | 8.16           | 6.80           | -0.62          | 0.14         | 0.11          | -0.78         |                |        |
| Cyprus                                | (2.47, 7.64)  | (4.28, 9.10)  | (1.08, 1.17) | <0.001 | (0.17, 2.81)  | (0.28, 2.59)  | (0.01, 0.33)  | 0.035  | (5.29, 12.08)  | (4.71, 9.70)   | (-0.86, -0.39) | <0.001       | (0.00, 1.58)  | (0.00, 1.40)  | (-1.21, -0.35) | <0.001 |
|                                       | 5.88          | 7.21          | 0.70         |        | 0.87          | 0.90          | 0.10          |        | 9.02           | 10.41          | 0.49           | 0.15         | 0.18          | 0.73          |                |        |
| Czechia                               | (5.12, 6.71)  | (6.29, 8.25)  | (0.62, 0.78) | <0.001 | (0.59, 1.23)  | (0.60, 1.33)  | (-0.03, 0.23) | 0.142  | (8.08, 10.05)  | (9.33, 11.61)  | (-0.04, 1.02)  | 0.069        | (0.05, 0.34)  | (0.06, 0.42)  | (0.07, 1.40)   | 0.030  |
| Democratic People's Republic of Korea | 4.43          | 4.61          | 0.16         |        | 0.55          | 0.56          | 0.08          |        | 9.67           | 7.86           | -0.72          | 0.16         | 0.13          | -0.78         |                |        |
|                                       | (3.98, 4.92)  | (4.20, 5.05)  | (0.06, 0.27) | 0.002  | (0.40, 0.74)  | (0.42, 0.73)  | (-0.01, 0.17) | 0.081  | (9.00, 10.37)  | (7.33, 8.43)   | (-0.78, -0.65) | <0.001       | (0.08, 0.28)  | (0.07, 0.22)  | (-0.91, -0.64) | <0.001 |
| Democratic Republic of the Congo      | 3.05          | 3.55          | 0.57         |        | 0.70          | 0.74          | 0.23          |        | 16.74          | 14.73          | -0.44          | 0.28         | 0.25          | -0.42         |                |        |
|                                       | (2.76, 3.36)  | (3.35, 3.76)  | (0.43, 0.70) | <0.001 | (0.57, 0.86)  | (0.65, 0.84)  | (0.18, 0.28)  | <0.001 | (16.04, 17.46) | (14.31, 15.16) | (-0.56, -0.33) | <0.001       | (0.20, 0.39)  | (0.20, 0.31)  | (-0.60, -0.23) | <0.001 |
|                                       | 5.99          | 8.37          | 1.16         |        | 0.82          | 0.91          | 0.36          |        | 3.55           | 3.86           | 0.27           | 0.06         | 0.07          | 0.52          |                |        |
| Denmark                               | (4.95, 7.20)  | (7.09, 9.82)  | (1.06, 1.25) | <0.001 | (0.47, 1.34)  | (0.52, 1.48)  | (0.24, 0.47)  | <0.001 | (2.77, 4.50)   | (3.02, 4.88)   | (-0.18, 0.71)  | 0.236        | (0.00, 0.33)  | (0.00, 0.35)  | (0.52, 0.52)   | <0.001 |
|                                       | 4.48          | 4.95          | 0.35         |        | 1.15          | 1.30          | 0.43          |        | 27.50          | 22.40          | -0.62          | 0.46         | 0.37          | -0.64         |                |        |
| Djibouti                              | (1.96, 9.06)  | (3.20, 7.32)  | (0.29, 0.40) | <0.001 | (0.15, 4.43)  | (0.51, 2.76)  | (0.35, 0.52)  | <0.001 | (20.35, 36.56) | (18.48, 26.93) | (-1.14, -0.09) | 0.021        | (0.01, 3.41)  | (0.04, 1.42)  | (-1.23, -0.05) | 0.034  |
|                                       | 7.27          | 10.95         | 1.40         |        | 0.87          | 1.18          | 1.05          |        | 35.68          | 35.07          | -0.21          | 0.60         | 0.59          | -0.06         |                |        |
| Dominica                              | (0.84, 28.56) | (2.10, 33.20) | (1.33, 1.47) | <0.001 | (0.00, 18.08) | (0.00, 16.99) | (0.96, 1.14)  | <0.001 | (16.84, 67.68) | (16.04, 66.68) | (-0.63, 0.23)  | 0.352        | (0.00, 17.62) | (0.00, 15.85) | (-0.55, 0.43)  | 0.798  |
| Dominican Republic                    | 4.59          | 9.18          | 2.45         | <0.001 | 0.66          | 1.08          | 1.73          | <0.001 | 17.49          | 24.50          | 1.13           | <0.001       | 0.29          | 0.41          | 1.13           | <0.001 |



|                   |        |        |        |        |        |        |         |        |         |         |         |        |        |        |         |        |
|-------------------|--------|--------|--------|--------|--------|--------|---------|--------|---------|---------|---------|--------|--------|--------|---------|--------|
| Republic          | (3.84, | (8.31, | (2.31, |        | (0.40, | (0.80, | (1.63,  |        | (15.99, | (23.07, | (0.76,  |        | (0.13, | (0.25, | (0.57,  |        |
|                   | 5.46)  | 10.11) | 2.60)  |        | 1.05)  | 1.44)  | 1.83)   |        | 19.11)  | 26.00)  | 1.50)   |        | 0.59)  | 0.65)  | 1.70)   |        |
|                   | 3.59   | 6.13   | 1.87   |        | 0.41   | 0.68   | 1.79    |        | 12.84   | 13.19   | 0.05    |        | 0.21   | 0.22   | -0.02   |        |
| Ecuador           | (3.02, | (5.57, | (1.83, | <0.001 | (0.23, | (0.50, | (1.66,  | <0.001 | (11.75, | (12.36, | (-0.31, | 0.788  | (0.09, | (0.12, | (-0.49, | 0.928  |
|                   | 4.25)  | 6.74)  | 1.91)  |        | 0.67)  | 0.90)  | 1.93)   |        | 14.02)  | 14.06)  | 0.40)   |        | 0.42)  | 0.36)  | 0.45)   |        |
|                   | 5.02   | 6.96   | 1.14   |        | 0.99   | 1.27   | 0.85    |        | 15.91   | 13.90   | -0.45   |        | 0.26   | 0.23   | -0.32   |        |
| Egypt             | (4.72, | (6.71, | (1.10, | <0.001 | (0.86, | (1.16, | (0.78,  | <0.001 | (15.38, | (13.54, | (-0.76, | 0.004  | (0.20, | (0.18, | (-0.72, | 0.108  |
|                   | 5.33)  | 7.22)  | 1.18)  |        | 1.14)  | 1.38)  | 0.93)   |        | 16.46)  | 14.26)  | -0.14)  |        | 0.34)  | 0.28)  | 0.07)   |        |
|                   | 3.81   | 5.73   | 1.43   |        | 0.45   | 0.70   | 1.56    |        | 12.54   | 8.23    | -1.35   |        | 0.21   | 0.14   | -1.51   |        |
| El Salvador       | (2.98, | (4.83, | (1.39, | <0.001 | (0.21, | (0.41, | (1.43,  | <0.001 | (11.00, | (7.14,  | (-1.88, | <0.001 | (0.06, | (0.03, | (-1.90, | <0.001 |
|                   | 4.82)  | 6.76)  | 1.48)  |        | 0.88)  | 1.11)  | 1.69)   |        | 14.24)  | 9.45)   | -0.80)  |        | 0.57)  | 0.39)  | -1.13)  |        |
|                   | 3.13   | 4.17   | 1.03   |        | 0.75   | 1.00   | 1.02    |        | 19.84   | 13.29   | -1.37   |        | 0.33   | 0.22   | -1.36   |        |
| Equatorial Guinea | (0.93, | (2.70, | (0.94, | <0.001 | (0.02, | (0.37, | (0.90,  | <0.001 | (13.15, | (10.47, | (-1.69, | <0.001 | (0.00, | (0.01, | (-1.88, | <0.001 |
|                   | 7.95)  | 6.25)  | 1.11)  |        | 4.40)  | 2.30)  | 1.15)   |        | 28.93)  | 16.71)  | -1.05)  |        | 3.73)  | 1.22)  | -0.83)  |        |
|                   | 4.10   | 4.17   | 0.10   |        | 0.71   | 0.82   | 0.49    |        | 27.27   | 23.51   | -0.53   |        | 0.46   | 0.40   | -0.53   |        |
| Eritrea           | (2.98, | (3.44, | (0.01, | 0.037  | (0.30, | (0.52, | (0.36,  | <0.001 | (24.19, | (21.71, | (-0.78, | <0.001 | (0.14, | (0.19, | (-0.82, | <0.001 |
|                   | 5.54)  | 5.02)  | 0.19)  |        | 1.47)  | 1.25)  | 0.63)   |        | 30.65)  | 25.44)  | -0.27)  |        | 1.14)  | 0.73)  | -0.25)  |        |
|                   | 6.67   | 8.51   | 0.83   |        | 0.95   | 1.12   | 0.55    |        | 22.89   | 18.31   | -0.85   |        | 0.38   | 0.31   | -0.74   |        |
| Estonia           | (4.74, | (5.93, | (0.72, | <0.001 | (0.33, | (0.33, | (0.48,  | <0.001 | (19.16, | (14.43, | (-1.75, | 0.068  | (0.05, | (0.02, | (-1.84, | 0.190  |
|                   | 9.16)  | 12.00) | 0.94)  |        | 2.20)  | 2.98)  | 0.62)   |        | 27.18)  | 23.06)  | 0.06)   |        | 1.37)  | 1.79)  | 0.37)   |        |
|                   | 4.37   | 5.24   | 0.63   |        | 0.88   | 0.93   | 0.19    |        | 26.20   | 27.51   | 0.13    |        | 0.44   | 0.46   | 0.07    |        |
| Eswatini          | (2.26, | (3.42, | (0.59, | <0.001 | (0.15, | (0.29, | (0.14,  | <0.001 | (20.43, | (23.07, | (-0.10, | 0.266  | (0.02, | (0.06, | (-0.30, | 0.725  |
|                   | 7.84)  | 7.74)  | 0.67)  |        | 3.15)  | 2.31)  | 0.25)   |        | 33.25)  | 32.59)  | 0.34)   |        | 2.54)  | 1.64)  | 0.43)   |        |
|                   | 3.67   | 3.92   | 0.25   |        | 0.66   | 0.80   | 0.71    |        | 23.11   | 12.81   | -2.04   |        | 0.39   | 0.21   | -2.12   |        |
| Ethiopia          | (3.39, | (3.73, | (0.14, | <0.001 | (0.54, | (0.72, | (0.60,  | <0.001 | (22.39, | (12.46, | (-2.22, | <0.001 | (0.30, | (0.17, | (-2.42, | <0.001 |
|                   | 3.96)  | 4.11)  | 0.35)  |        | 0.79)  | 0.89)  | 0.83)   |        | 23.84)  | 13.16)  | -1.85)  |        | 0.50)  | 0.27)  | -1.83)  |        |
|                   | 7.94   | 11.00  | 1.11   |        | 1.32   | 1.57   | 0.59    |        | 52.88   | 73.04   | 1.12    |        | 0.89   | 1.23   | 1.13    |        |
| Fiji              | (5.14, | (7.85, | (1.04, | <0.001 | (0.37, | (0.56, | (0.50,  | <0.001 | (45.13, | (64.48, | (0.88,  | <0.001 | (0.16, | (0.36, | (0.88,  | <0.001 |
|                   | 11.81) | 15.02) | 1.18)  |        | 3.44)  | 3.52)  | 0.68)   |        | 61.65)  | 82.44)  | 1.37)   |        | 2.82)  | 3.03)  | 1.38)   |        |
|                   | 6.16   | 6.60   | 0.23   |        | 0.96   | 0.83   | -0.53   |        | 7.38    | 4.74    | -1.52   |        | 0.12   | 0.08   | -1.58   |        |
| Finland           | (5.08, | (5.44, | (0.17, | <0.001 | (0.56, | (0.46, | (-0.73, | <0.001 | (6.21,  | (3.78,  | (-1.90, | <0.001 | (0.02, | (0.01, | (-2.51, | 0.001  |
|                   | 7.42)  | 7.96)  | 0.28)  |        | 1.55)  | 1.42)  | -0.33)  |        | 8.74)   | 5.90)   | -1.14)  |        | 0.46)  | 0.40)  | -0.64)  |        |
| France            | 5.62   | 6.89   | 0.71   | <0.001 | 1.35   | 1.07   | -0.81   | <0.001 | 4.22    | 6.08    | 1.21    | <0.001 | 0.07   | 0.10   | 1.16    | 0.010  |

|           |        |        |        |        |        |        |         |        |         |         |         |        |        |        |         |        |
|-----------|--------|--------|--------|--------|--------|--------|---------|--------|---------|---------|---------|--------|--------|--------|---------|--------|
|           | (5.32, | (6.53, | (0.68, |        | (1.20, | (0.93, | (-0.87, |        | (3.96,  | (5.74,  | (0.74,  |        | (0.04, | (0.06, | (0.28,  |        |
|           | 5.94)  | 7.26)  | 0.74)  |        | 1.51)  | 1.23)  | -0.74)  |        | 4.50)   | 6.43)   | 1.67)   |        | 0.12)  | 0.16)  | 2.05)   |        |
|           | 3.90   | 4.34   | 0.37   |        | 1.02   | 1.09   | 0.24    |        | 22.17   | 18.09   | -0.73   |        | 0.38   | 0.31   | -0.72   |        |
| Gabon     | (2.14, | (2.96, | (0.35, | <0.001 | (0.26, | (0.47, | (0.19,  | <0.001 | (17.52, | (15.11, | (-0.98, | <0.001 | (0.02, | (0.04, | (-1.35, | 0.026  |
|           | 6.63)  | 6.17)  | 0.40)  |        | 2.82)  | 2.18)  | 0.29)   |        | 27.75)  | 21.51)  | -0.49)  |        | 1.89)  | 1.10)  | -0.09)  |        |
|           | 3.59   | 4.43   | 0.77   |        | 0.81   | 0.91   | 0.43    |        | 14.93   | 14.95   | -0.03   |        | 0.25   | 0.25   | 0.07    |        |
| Gambia    | (1.91, | (3.16, | (0.66, | <0.001 | (0.16, | (0.40, | (0.36,  | <0.001 | (11.11, | (12.48, | (-1.26, | 0.960  | (0.00, | (0.03, | (-0.98, | 0.896  |
|           | 6.34)  | 6.07)  | 0.89)  |        | 2.67)  | 1.85)  | 0.51)   |        | 19.76)  | 17.79)  | 1.21)   |        | 1.85)  | 0.94)  | 1.13)   |        |
|           | 3.50   | 4.22   | 0.65   |        | 0.38   | 0.43   | 0.44    |        | 6.24    | 8.29    | 0.81    |        | 0.10   | 0.14   | 0.48    |        |
| Georgia   | (2.75, | (3.13, | (0.60, | <0.001 | (0.16, | (0.14, | (0.36,  | <0.001 | (5.23,  | (6.76,  | (-1.29, | 0.450  | (0.02, | (0.01, | (-2.25, | 0.735  |
|           | 4.39)  | 5.59)  | 0.70)  |        | 0.75)  | 1.06)  | 0.52)   |        | 7.39)   | 10.11)  | 2.96)   |        | 0.36)  | 0.63)  | 3.27)   |        |
|           | 6.55   | 7.89   | 0.60   |        | 1.34   | 1.18   | -0.45   |        | 8.19    | 7.55    | -0.34   |        | 0.14   | 0.13   | -0.25   |        |
| Germany   | (6.26, | (7.55, | (0.54, | <0.001 | (1.21, | (1.05, | (-0.53, | <0.001 | (7.87,  | (7.23,  | (-0.69, | 0.066  | (0.10, | (0.09, | (-0.82, | 0.384  |
|           | 6.85)  | 8.24)  | 0.66)  |        | 1.48)  | 1.33)  | -0.37)  |        | 8.52)   | 7.89)   | 0.02)   |        | 0.19)  | 0.18)  | 0.32)   |        |
|           | 4.16   | 4.79   | 0.49   |        | 1.05   | 1.13   | 0.25    |        | 26.09   | 21.06   | -0.73   |        | 0.44   | 0.36   | -0.69   |        |
| Ghana     | (3.64, | (4.43, | (0.43, | <0.001 | (0.79, | (0.95, | (0.19,  | <0.001 | (24.73, | (20.28, | (-0.94, | <0.001 | (0.28, | (0.26, | (-1.05, | <0.001 |
|           | 4.74)  | 5.18)  | 0.54)  |        | 1.36)  | 1.32)  | 0.31)   |        | 27.51)  | 21.87)  | -0.52)  |        | 0.67)  | 0.48)  | -0.33)  |        |
|           | 5.45   | 6.57   | 0.67   |        | 0.74   | 0.75   | 0.05    |        | 2.15    | 5.13    | 3.08    |        | 0.04   | 0.09   | 3.05    |        |
| Greece    | (4.73, | (5.68, | (0.64, | <0.001 | (0.49, | (0.47, | (-0.01, | 0.130  | (1.71,  | (4.34,  | (2.70,  | <0.001 | (0.00, | (0.01, | (2.10,  | <0.001 |
|           | 6.25)  | 7.58)  | 0.70)  |        | 1.07)  | 1.16)  | 0.11)   |        | 2.68)   | 6.02)   | 3.46)   |        | 0.17)  | 0.29)  | 4.01)   |        |
|           | 4.84   | 5.30   | 0.34   |        | 1.26   | 1.07   | -0.57   |        | 7.12    | 5.52    | -0.91   |        | 0.13   | 0.10   | -0.88   |        |
| Greenland | (0.22, | (0.17, | (0.20, | <0.001 | (0.00, | (0.00, | (-0.71, | <0.001 | (0.80,  | (0.22,  | (-1.21, | <0.001 | (0.00, | (0.00, | (-1.34, | <0.001 |
|           | 29.39) | 31.43) | 0.48)  |        | 23.95) | 24.38) | -0.43)  |        | 32.52)  | 31.60)  | -0.60)  |        | 22.26) | 22.70) | -0.41)  |        |
|           | 8.74   | 13.84  | 1.58   |        | 1.30   | 1.75   | 1.01    |        | 56.77   | 44.93   | -0.80   |        | 0.97   | 0.76   | -0.87   |        |
| Grenada   | (1.60, | (4.74, | (1.52, | <0.001 | (0.00, | (0.01, | (0.91,  | <0.001 | (33.41, | (26.47, | (-1.40, | 0.009  | (0.00, | (0.00, | (-1.49, | 0.007  |
|           | 28.22) | 32.03) | 1.64)  |        | 16.35) | 13.90) | 1.11)   |        | 91.09)  | 71.92)  | -0.20)  |        | 15.81) | 12.18) | -0.24)  |        |
|           | 5.92   | 9.84   | 1.78   |        | 1.05   | 1.44   | 1.09    |        | 12.70   | 37.22   | 3.80    |        | 0.21   | 0.63   | 3.87    |        |
| Guam      | (1.51, | (3.55, | (1.73, | <0.001 | (0.00, | (0.02, | (1.00,  | <0.001 | (5.47,  | (23.30, | (3.10,  | <0.001 | (0.00, | (0.00, | (2.97,  | <0.001 |
|           | 16.02) | 21.87) | 1.83)  |        | 8.45)  | 9.31)  | 1.17)   |        | 25.37)  | 56.56)  | 4.51)   |        | 6.91)  | 7.89)  | 4.79)   |        |
|           | 3.56   | 5.15   | 1.30   |        | 0.35   | 0.56   | 1.66    |        | 6.67    | 11.20   | 1.63    |        | 0.11   | 0.19   | 1.59    |        |
| Guatemala | (2.89, | (4.65, | (1.25, | <0.001 | (0.16, | (0.40, | (1.50,  | <0.001 | (5.74,  | (10.46, | (0.85,  | <0.001 | (0.02, | (0.10, | (0.62,  | 0.001  |
|           | 4.36)  | 5.69)  | 1.35)  |        | 0.65)  | 0.76)  | 1.82)   |        | 7.72)   | 11.98)  | 2.42)   |        | 0.34)  | 0.32)  | 2.57)   |        |
| Guinea    | 3.23   | 3.93   | 0.74   | <0.001 | 0.61   | 0.73   | 0.63    | <0.001 | 19.13   | 16.11   | -0.61   | <0.001 | 0.33   | 0.27   | -0.70   | <0.001 |

|                               |        |        |        |        |        |        |        |        |         |         |         |        |        |        |         |        |
|-------------------------------|--------|--------|--------|--------|--------|--------|--------|--------|---------|---------|---------|--------|--------|--------|---------|--------|
|                               | (2.51, | (3.38, | (0.64, |        | (0.32, | (0.50, | (0.52, |        | (17.26, | (14.94, | (-0.83, |        | (0.12, | (0.14, | (-1.00, |        |
|                               | 4.10)  | 4.55)  | 0.84)  |        | 1.07)  | 1.03)  | 0.73)  |        | 21.15)  | 17.34)  | -0.39)  |        | 0.70)  | 0.49)  | -0.39)  |        |
|                               | 3.33   | 4.07   | 0.76   |        | 0.36   | 0.44   | 0.70   |        | 17.96   | 14.60   | -0.74   |        | 0.31   | 0.25   | -0.78   |        |
| Guinea-Bissau                 | (1.71, | (2.78, | (0.60, | <0.001 | (0.02, | (0.10, | (0.53, | <0.001 | (13.72, | (11.99, | (-0.82, | <0.001 | (0.01, | (0.03, | (-0.97, | <0.001 |
|                               | 5.96)  | 5.81)  | 0.92)  |        | 1.93)  | 1.29)  | 0.88)  |        | 23.19)  | 17.64)  | -0.66)  |        | 1.87)  | 1.01)  | -0.60)  |        |
|                               | 5.57   | 12.13  | 2.70   |        | 0.73   | 1.26   | 1.88   |        | 32.17   | 67.07   | 2.68    |        | 0.54   | 1.14   | 2.98    |        |
| Guyana                        | (3.29, | (8.53, | (2.64, | <0.001 | (0.11, | (0.34, | (1.78, | <0.001 | (26.25, | (58.22, | (1.93,  | <0.001 | (0.05, | (0.27, | (2.50,  | <0.001 |
|                               | 8.95)  | 16.78) | 2.77)  |        | 2.59)  | 3.36)  | 1.97)  |        | 39.12)  | 76.93)  | 3.43)   |        | 2.32)  | 3.20)  | 3.45)   |        |
|                               | 4.26   | 7.14   | 1.85   |        | 0.38   | 0.64   | 1.88   |        | 28.72   | 27.75   | -0.04   |        | 0.48   | 0.47   | -0.03   |        |
| Haiti                         | (3.46, | (6.43, | (1.72, | <0.001 | (0.17, | (0.44, | (1.70, | <0.001 | (26.58, | (26.34, | (-0.40, | 0.845  | (0.24, | (0.30, | (-0.41, | 0.870  |
|                               | 5.19)  | 7.90)  | 1.99)  |        | 0.73)  | 0.89)  | 2.06)  |        | 31.00)  | 29.21)  | 0.33)   |        | 0.87)  | 0.70)  | 0.35)   |        |
|                               | 3.96   | 5.71   | 1.28   |        | 0.34   | 0.53   | 1.58   |        | 6.37    | 4.35    | -1.30   |        | 0.11   | 0.07   | -1.55   |        |
| Honduras                      | (3.04, | (4.99, | (1.23, | <0.001 | (0.12, | (0.33, | (1.49, | <0.001 | (5.17,  | (3.72,  | (-1.86, | <0.001 | (0.01, | (0.01, | (-1.55, | <0.001 |
|                               | 5.09)  | 6.51)  | 1.33)  |        | 0.79)  | 0.82)  | 1.67)  |        | 7.77)   | 5.07)   | -0.73)  |        | 0.47)  | 0.23)  | -1.55)  |        |
|                               | 5.58   | 6.58   | 0.59   |        | 0.60   | 0.66   | 0.33   |        | 8.25    | 9.82    | 0.63    |        | 0.14   | 0.17   | 0.78    |        |
| Hungary                       | (4.85, | (5.68, | (0.54, | <0.001 | (0.38, | (0.40, | (0.26, | <0.001 | (7.36,  | (8.73,  | (0.33,  | <0.001 | (0.05, | (0.05, | (0.31,  | 0.001  |
|                               | 6.40)  | 7.60)  | 0.63)  |        | 0.92)  | 1.05)  | 0.40)  |        | 9.23)   | 11.03)  | 0.93)   |        | 0.33)  | 0.41)  | 1.26)   |        |
|                               | 5.33   | 7.52   | 1.20   |        | 0.85   | 0.95   | 0.39   |        | 2.16    | 2.98    | 1.19    |        | 0.04   | 0.05   | 1.39    |        |
| Iceland                       | (1.86, | (3.46, | (1.18, | <0.001 | (0.01, | (0.04, | (0.34, | <0.001 | (0.31,  | (0.75,  | (0.93,  | <0.001 | (0.00, | (0.00, | (0.79,  | <0.001 |
|                               | 12.09) | 14.55) | 1.22)  |        | 5.39)  | 5.36)  | 0.44)  |        | 7.50)   | 8.39)   | 1.44)   |        | 3.91)  | 3.85)  | 2.00)   |        |
|                               | 3.23   | 4.49   | 1.18   |        | 0.35   | 0.46   | 1.01   |        | 10.47   | 10.70   | 0.07    |        | 0.18   | 0.18   | 0.02    |        |
| India                         | (3.17, | (4.44, | (1.07, | <0.001 | (0.33, | (0.44, | (0.83, | <0.001 | (10.36, | (10.62, | (-0.30, | 0.714  | (0.16, | (0.17, | (-0.59, | 0.959  |
|                               | 3.29)  | 4.55)  | 1.28)  |        | 0.37)  | 0.48)  | 1.20)  |        | 10.58)  | 10.78)  | 0.44)   |        | 0.19)  | 0.19)  | 0.62)   |        |
|                               | 4.95   | 6.38   | 0.91   |        | 1.06   | 1.25   | 0.59   |        | 28.78   | 23.46   | -0.69   |        | 0.48   | 0.39   | -0.75   |        |
| Indonesia                     | (4.79, | (6.23, | (0.84, | <0.001 | (0.99, | (1.19, | (0.54, | <0.001 | (28.40, | (23.17, | (-0.84, | <0.001 | (0.43, | (0.36, | (-0.88, | <0.001 |
|                               | 5.11)  | 6.54)  | 0.98)  |        | 1.14)  | 1.32)  | 0.64)  |        | 29.17)  | 23.75)  | -0.53)  |        | 0.54)  | 0.43)  | -0.62)  |        |
|                               | 6.11   | 7.92   | 0.91   |        | 0.95   | 1.12   | 0.60   |        | 9.10    | 8.43    | -0.26   |        | 0.15   | 0.14   | -0.30   |        |
| Iran (Islamic<br>Republic of) | (5.78, | (7.62, | (0.85, | <0.001 | (0.82, | (1.01, | (0.54, | <0.001 | (8.70,  | (8.13,  | (-0.50, | 0.029  | (0.10, | (0.10, | (-0.80, | 0.237  |
|                               | 6.45)  | 8.22)  | 0.98)  |        | 1.10)  | 1.24)  | 0.66)  |        | 9.52)   | 8.74)   | -0.03)  |        | 0.22)  | 0.18)  | 0.20)   |        |
|                               | 5.34   | 6.56   | 0.73   |        | 0.69   | 0.82   | 0.60   |        | 7.71    | 6.43    | -0.65   |        | 0.13   | 0.11   | -0.72   |        |
| Iraq                          | (4.77, | (6.19, | (0.66, | <0.001 | (0.50, | (0.69, | (0.57, | <0.001 | (7.02,  | (6.06,  | (-0.84, | <0.001 | (0.05, | (0.06, | (-1.08, | <0.001 |
|                               | 5.96)  | 6.95)  | 0.80)  |        | 0.94)  | 0.96)  | 0.63)  |        | 8.46)   | 6.81)   | -0.46)  |        | 0.27)  | 0.17)  | -0.36)  |        |
|                               | 5.97   | 7.28   | 0.69   | <0.001 | 0.90   | 0.89   | -0.03  | 0.301  | 3.43    | 3.91    | 0.43    | 0.014  | 0.06   | 0.07   | 0.44    | 0.123  |

|              |        |        |         |        |        |        |         |        |         |          |         |        |        |        |         |        |
|--------------|--------|--------|---------|--------|--------|--------|---------|--------|---------|----------|---------|--------|--------|--------|---------|--------|
|              | (4.73, | (6.03, | (0.65,  |        | (0.46, | (0.49, | (-0.08, |        | (2.50,  | (3.02,   | (0.09,  |        | (0.00, | (0.00, | (-0.12, |        |
|              | 7.43)  | 8.73)  | 0.73)   |        | 1.57)  | 1.50)  | 0.02)   |        | 4.58)   | 4.99)    | 0.78)   |        | 0.40)  | 0.38)  | 1.00)   |        |
|              | 5.52   | 7.00   | 0.83    |        | 1.03   | 1.03   | 0.01    |        | 6.25    | 5.67     | -0.35   |        | 0.10   | 0.10   | 0.09    |        |
| Israel       | (4.51, | (6.12, | (0.80,  | <0.001 | (0.62, | (0.71, | (-0.04, | 0.776  | (5.17,  | (4.88,   | (-0.69, | 0.042  | (0.01, | (0.02, | (-0.59, | 0.804  |
|              | 6.69)  | 7.98)  | 0.86)   |        | 1.61)  | 1.45)  | 0.06)   |        | 7.50)   | 6.55)    | -0.01)  |        | 0.39)  | 0.28)  | 0.77)   |        |
|              | 8.23   | 5.26   | -1.58   |        | 1.24   | 0.85   | -1.30   |        | 2.37    | 5.93     | 3.21    |        | 0.04   | 0.10   | 3.23    |        |
| Italy        | (7.85, | (4.91, | (-1.72, | <0.001 | (1.09, | (0.71, | (-1.45, | <0.001 | (2.17,  | (5.56,   | (2.55,  | <0.001 | (0.02, | (0.06, | (2.65,  | <0.001 |
|              | 8.62)  | 5.62)  | -1.43)  |        | 1.40)  | 1.01)  | -1.15)  |        | 2.59)   | 6.31)    | 3.87)   |        | 0.08)  | 0.16)  | 3.81)   |        |
|              | 5.80   | 11.86  | 2.49    |        | 0.95   | 1.52   | 1.63    |        | 16.56   | 30.08    | 2.14    |        | 0.27   | 0.50   | 2.20    |        |
| Jamaica      | (4.34, | (9.97, | (2.41,  | <0.001 | (0.44, | (0.90, | (1.58,  | <0.001 | (14.04, | (27.04,  | (0.33,  | 0.020  | (0.04, | (0.18, | (0.29,  | 0.024  |
|              | 7.64)  | 14.01) | 2.56)   |        | 1.88)  | 2.41)  | 1.68)   |        | 19.44)  | 33.37)   | 3.99)   |        | 0.95)  | 1.11)  | 4.15)   |        |
|              | 7.52   | 6.36   | -0.58   |        | 1.66   | 1.43   | -0.51   |        | 3.95    | 4.45     | 0.40    |        | 0.06   | 0.07   | 0.25    |        |
| Japan        | (7.26, | (6.09, | (-0.62, | <0.001 | (1.55, | (1.30, | (-0.65, | <0.001 | (3.77,  | (4.23,   | (0.08,  | 0.015  | (0.04, | (0.05, | (-0.24, | 0.319  |
|              | 7.78)  | 6.63)  | -0.54)  |        | 1.79)  | 1.56)  | -0.37)  |        | 4.14)   | 4.69)    | 0.71)   |        | 0.09)  | 0.11)  | 0.73)   |        |
|              | 7.43   | 7.78   | 0.14    |        | 1.97   | 2.09   | 0.20    |        | 19.51   | 10.79    | -2.00   |        | 0.33   | 0.18   | -2.07   |        |
| Jordan       | (6.00, | (7.02, | (0.09,  | <0.001 | (1.27, | (1.70, | (0.14,  | <0.001 | (17.10, | (9.89,   | (-2.50, | <0.001 | (0.09, | (0.08, | (-2.67, | <0.001 |
|              | 9.14)  | 8.61)  | 0.20)   |        | 2.96)  | 2.54)  | 0.26)   |        | 22.19)  | 11.76)   | -1.51)  |        | 0.91)  | 0.35)  | -1.47)  |        |
|              | 3.35   | 4.16   | 0.75    |        | 0.32   | 0.38   | 0.57    |        | 8.98    | 12.99    | 1.21    |        | 0.15   | 0.22   | 1.19    |        |
| Kazakhstan   | (2.93, | (3.69, | (0.70,  | <0.001 | (0.20, | (0.25, | (0.40,  | <0.001 | (8.28,  | (12.17,  | (0.57,  | <0.001 | (0.07, | (0.13, | (0.41,  | 0.003  |
|              | 3.81)  | 4.67)  | 0.80)   |        | 0.48)  | 0.56)  | 0.74)   |        | 9.72)   | 13.85)   | 1.86)   |        | 0.28)  | 0.37)  | 1.97)   |        |
|              | 4.03   | 4.60   | 0.51    |        | 1.20   | 1.23   | 0.09    |        | 16.72   | 17.19    | 0.10    |        | 0.28   | 0.29   | 0.08    |        |
| Kenya        | (3.60, | (4.32, | (0.34,  | <0.001 | (0.98, | (1.09, | (0.04,  | 0.001  | (15.81, | (16.63,  | (-0.02, | 0.112  | (0.17, | (0.22, | (-0.13, | 0.452  |
|              | 4.50)  | 4.91)  | 0.69)   |        | 1.48)  | 1.39)  | 0.14)   |        | 17.67)  | 17.77)   | 0.21)   |        | 0.44)  | 0.37)  | 0.30)   |        |
|              | 10.53  | 11.68  | 0.35    |        | 1.23   | 1.36   | 0.35    |        | 124.01  | 158.68   | 0.83    |        | 2.12   | 2.71   | 0.83    |        |
| Kiribati     | (2.20, | (4.09, | (0.29,  | <0.001 | (0.00, | (0.01, | (0.23,  | <0.001 | (86.50, | (124.88, | (0.59,  | <0.001 | (0.01, | (0.14, | (0.60,  | <0.001 |
|              | 32.19) | 26.47) | 0.40)   |        | 17.55) | 10.93) | 0.48)   |        | 173.17) | 199.04)  | 1.07)   |        | 19.16) | 13.26) | 1.06)   |        |
|              | 5.82   | 7.31   | 0.79    |        | 0.93   | 1.09   | 0.55    |        | 4.89    | 5.74     | 0.75    |        | 0.08   | 0.09   | 0.80    |        |
| Kuwait       | (4.32, | (6.15, | (0.75,  | <0.001 | (0.40, | (0.68, | (0.48,  | <0.001 | (3.53,  | (4.73,   | (-0.24, | 0.139  | (0.00, | (0.01, | (-0.94, | 0.370  |
|              | 7.74)  | 8.68)  | 0.83)   |        | 1.91)  | 1.74)  | 0.62)   |        | 6.66)   | 6.95)    | 1.76)   |        | 0.73)  | 0.47)  | 2.56)   |        |
|              | 3.06   | 3.59   | 0.56    |        | 0.30   | 0.34   | 0.53    |        | 5.38    | 6.33     | 0.58    |        | 0.09   | 0.11   | 0.71    |        |
| Kyrgyzstan   | (2.30, | (2.91, | (0.50,  | <0.001 | (0.10, | (0.15, | (0.38,  | <0.001 | (4.34,  | (5.41,   | (-0.33, | 0.212  | (0.01, | (0.02, | (-0.56, | 0.272  |
|              | 4.01)  | 4.40)  | 0.63)   |        | 0.70)  | 0.65)  | 0.67)   |        | 6.60)   | 7.38)    | 1.50)   |        | 0.41)  | 0.34)  | 2.00)   |        |
| Lao People's | 3.64   | 5.01   | 1.13    | <0.001 | 0.54   | 0.71   | 0.96    | <0.001 | 18.59   | 28.14    | 1.48    | <0.001 | 0.31   | 0.47   | 1.46    | <0.001 |

|                     |               |               |                |        |              |              |                |        |                |                |                |              |              |              |                |        |
|---------------------|---------------|---------------|----------------|--------|--------------|--------------|----------------|--------|----------------|----------------|----------------|--------------|--------------|--------------|----------------|--------|
| Democratic Republic | (2.73, 4.78)  | (4.26, 5.87)  | (1.07, 1.19)   |        | (0.23, 1.10) | (0.44, 1.08) | (0.81, 1.10)   |        | (16.42, 20.99) | (26.31, 30.08) | (1.28, 1.68)   | (0.09, 0.80) | (0.26, 0.79) | (1.07, 1.86) |                |        |
|                     | 6.43          | 8.40          | 0.93           |        | 0.57         | 0.74         | 0.92           |        | 15.25          | 11.42          | -0.95          | 0.26         | 0.20         | -0.91        |                |        |
| Latvia              | (4.93, 8.25)  | (6.20, 11.24) | (0.85, 1.01)   | <0.001 | (0.20, 1.32) | (0.21, 2.02) | (0.77, 1.06)   | <0.001 | (12.91, 17.92) | (8.88, 14.57)  | (-1.84, -0.06) | 0.037        | (0.04, 0.86) | (0.01, 1.21) | (-2.42, 0.64)  | 0.247  |
|                     | 7.13          | 8.85          | 0.73           |        | 0.94         | 1.14         | 0.67           |        | 12.31          | 9.24           | -0.96          | 0.20         | 0.15         | -1.03        |                |        |
| Lebanon             | (5.66, 8.88)  | (7.61, 10.25) | (0.69, 0.77)   | <0.001 | (0.46, 1.72) | (0.72, 1.72) | (0.55, 0.78)   | <0.001 | (10.36, 14.55) | (7.96, 10.67)  | (-1.16, -0.77) | <0.001       | (0.03, 0.72) | (0.03, 0.47) | (-1.49, -0.57) | <0.001 |
|                     | 4.07          | 5.12          | 0.81           |        | 0.82         | 0.87         | 0.21           |        | 22.94          | 29.29          | 0.87           | 0.38         | 0.49         | 0.84         |                |        |
| Lesotho             | (2.67, 6.01)  | (3.78, 6.81)  | (0.74, 0.89)   | <0.001 | (0.29, 1.94) | (0.38, 1.72) | (0.09, 0.32)   | <0.001 | (19.38, 27.03) | (25.93, 32.98) | (0.61, 1.13)   | <0.001       | (0.06, 1.35) | (0.15, 1.20) | (0.58, 1.11)   | <0.001 |
|                     | 3.28          | 4.07          | 0.78           |        | 0.60         | 0.72         | 0.65           |        | 20.09          | 12.35          | -1.71          | 0.34         | 0.21         | -1.67        |                |        |
| Liberia             | (2.04, 5.03)  | (3.22, 5.09)  | (0.64, 0.92)   | <0.001 | (0.16, 1.60) | (0.39, 1.22) | (0.56, 0.74)   | <0.001 | (16.71, 23.97) | (10.81, 14.06) | (-2.26, -1.17) | <0.001       | (0.04, 1.22) | (0.05, 0.55) | (-2.21, -1.12) | <0.001 |
|                     | 4.73          | 6.14          | 0.90           |        | 0.66         | 0.84         | 0.81           |        | 9.19           | 8.45           | -0.34          | 0.15         | 0.14         | -0.25        |                |        |
| Libya               | (3.69, 5.99)  | (5.29, 7.09)  | (0.88, 0.92)   | <0.001 | (0.32, 1.26) | (0.55, 1.24) | (0.75, 0.88)   | <0.001 | (7.74, 10.87)  | (7.45, 9.56)   | (-0.80, 0.13)  | 0.156        | (0.02, 0.56) | (0.04, 0.36) | (-1.01, 0.51)  | 0.515  |
|                     | 5.84          | 7.72          | 0.96           |        | 0.65         | 0.81         | 0.74           |        | 16.22          | 13.77          | -0.63          | 0.28         | 0.24         | -0.62        |                |        |
| Lithuania           | (4.65, 7.26)  | (5.98, 9.87)  | (0.88, 1.04)   | <0.001 | (0.30, 1.24) | (0.32, 1.75) | (0.53, 0.96)   | <0.001 | (14.20, 18.46) | (11.45, 16.48) | (-1.64, 0.38)  | 0.220        | (0.07, 0.73) | (0.03, 0.95) | (-1.66, 0.44)  | 0.251  |
|                     | 5.44          | 6.86          | 0.80           |        | 1.82         | 1.63         | -0.38          |        | 7.23           | 10.38          | 1.27           | 0.12         | 0.17         | 1.14         |                |        |
| Luxembourg          | (2.36, 11.29) | (3.83, 11.65) | (0.77, 0.82)   | <0.001 | (0.33, 6.39) | (0.38, 4.89) | (-0.41, -0.35) | <0.001 | (3.59, 13.57)  | (6.57, 15.89)  | (0.77, 1.77)   | <0.001       | (0.00, 3.83) | (0.00, 2.69) | (0.44, 1.84)   | 0.001  |
|                     | 6.55          | 5.84          | -0.41          |        | 1.28         | 1.33         | 0.11           |        | 66.80          | 40.27          | -1.86          | 1.12         | 0.68         | -1.73        |                |        |
| Madagascar          | (5.79, 7.38)  | (5.38, 6.33)  | (-0.48, -0.35) | <0.001 | (0.97, 1.68) | (1.12, 1.58) | (0.05, 0.18)   | 0.001  | (64.33, 69.34) | (39.05, 41.53) | (-2.60, -1.12) | <0.001       | (0.82, 1.51) | (0.52, 0.86) | (-2.14, -1.32) | <0.001 |
|                     | 3.50          | 4.21          | 0.69           |        | 0.78         | 0.88         | 0.43           |        | 21.21          | 20.65          | -0.09          | 0.35         | 0.34         | 0.05         |                |        |
| Malawi              | (2.90, 4.20)  | (3.75, 4.72)  | (0.54, 0.85)   | <0.001 | (0.51, 1.15) | (0.67, 1.13) | (0.30, 0.56)   | <0.001 | (19.67, 22.85) | (19.59, 21.75) | (-0.25, 0.07)  | 0.271        | (0.18, 0.64) | (0.22, 0.52) | (-0.16, 0.25)  | 0.665  |
|                     | 8.69          | 9.57          | 0.31           |        | 2.84         | 3.17         | 0.39           |        | 63.12          | 48.89          | -0.88          | 1.06         | 0.83         | -0.84        |                |        |
| Malaysia            | (8.02, 9.40)  | (9.07, 10.10) | (0.23, 0.40)   | <0.001 | (2.47, 3.26) | (2.88, 3.48) | (0.31, 0.46)   | <0.001 | (61.30, 64.99) | (47.73, 50.06) | (-1.53, -0.23) | 0.008        | (0.84, 1.33) | (0.69, 1.00) | (-1.49, -0.19) | 0.011  |
|                     | 4.73          | 6.28          | 0.96           | <0.001 | 1.01         | 1.28         | 0.83           | <0.001 | 20.21          | 11.36          | -1.85          | <0.001       | 0.34         | 0.19         | -1.84          | <0.001 |

|                                  |               |               |              |        |               |               |                |        |                |                 |                |        |               |               |                |
|----------------------------------|---------------|---------------|--------------|--------|---------------|---------------|----------------|--------|----------------|-----------------|----------------|--------|---------------|---------------|----------------|
|                                  | (1.10, 14.59) | (3.55, 10.85) | (0.88, 1.03) |        | (0.01, 9.10)  | (0.28, 4.47)  | (0.77, 0.88)   |        | (11.10, 34.84) | (7.57, 16.90)   | (-2.36, -1.34) |        | (0.00, 8.08)  | (0.00, 2.94)  | (-2.32, -1.36) |
|                                  | 3.46          | 4.02          | 0.53         |        | 0.65          | 0.73          | 0.42           |        | 22.37          | 16.23           | -1.06          |        | 0.38          | 0.27          | -1.16          |
| Mali                             | (2.82, 4.23)  | (3.58, 4.51)  | (0.46, 0.61) | <0.001 | (0.39, 1.03)  | (0.55, 0.96)  | (0.30, 0.54)   | <0.001 | (20.62, 24.23) | (15.30, 17.20)  | (-1.41, -0.71) | <0.001 | (0.18, 0.71)  | (0.16, 0.43)  | (-1.47, -0.84) |
|                                  | 5.67          | 7.51          | 0.97         |        | 1.44          | 1.30          | -0.40          |        | 4.43           | 9.62            | 2.68           |        | 0.07          | 0.16          | 2.82           |
| Malta                            | (2.44, 11.48) | (3.67, 14.27) | (0.88, 1.06) | <0.001 | (0.17, 5.57)  | (0.13, 5.93)  | (-0.47, -0.33) | <0.001 | (1.64, 9.84)   | (5.19, 16.90)   | (2.29, 3.08)   | <0.001 | (0.00, 3.30)  | (0.00, 4.18)  | (2.39, 3.26)   |
|                                  | 5.60          | 7.99          | 1.24         |        | 0.69          | 0.88          | 0.84           |        | 31.68          | 63.98           | 2.43           |        | 0.54          | 1.09          | 2.42           |
| Marshall Islands                 | (0.10, 37.00) | (0.89, 30.14) | (1.19, 1.28) | <0.001 | (0.00, 28.56) | (0.00, 17.88) | (0.74, 0.95)   | <0.001 | (10.19, 76.29) | (35.90, 105.55) | (2.33, 2.54)   | <0.001 | (0.00, 28.32) | (0.00, 18.30) | (2.20, 2.64)   |
|                                  | 3.88          | 4.24          | 0.33         |        | 0.77          | 0.85          | 0.31           |        | 19.54          | 8.51            | -2.87          |        | 0.33          | 0.14          | -2.88          |
| Mauritania                       | (2.59, 5.63)  | (3.27, 5.42)  | (0.25, 0.41) | <0.001 | (0.27, 1.79)  | (0.45, 1.48)  | (0.25, 0.37)   | <0.001 | (16.41, 23.12) | (7.08, 10.17)   | (-3.14, -2.60) | <0.001 | (0.05, 1.16)  | (0.02, 0.54)  | (-3.05, -2.72) |
|                                  | 5.09          | 8.12          | 1.63         |        | 1.08          | 1.30          | 0.66           |        | 12.51          | 30.75           | 3.18           |        | 0.21          | 0.52          | 3.22           |
| Mauritius                        | (3.31, 7.52)  | (5.76, 11.15) | (1.56, 1.69) | <0.001 | (0.37, 2.47)  | (0.49, 2.86)  | (0.57, 0.75)   | <0.001 | (9.61, 16.03)  | (25.99, 36.17)  | (2.33, 4.04)   | <0.001 | (0.01, 1.18)  | (0.09, 1.73)  | (2.39, 4.06)   |
|                                  | 4.85          | 6.58          | 1.04         |        | 0.62          | 0.80          | 0.89           |        | 6.54           | 9.20            | 1.31           |        | 0.11          | 0.15          | 1.27           |
| Mexico                           | (4.62, 5.09)  | (6.36, 6.81)  | (0.92, 1.16) | <0.001 | (0.54, 0.71)  | (0.73, 0.89)  | (0.69, 1.09)   | <0.001 | (6.26, 6.82)   | (8.94, 9.47)    | (0.63, 1.99)   | <0.001 | (0.08, 0.15)  | (0.12, 0.19)  | (0.21, 2.34)   |
| Micronesia (Federated States of) | 5.62          | 8.46          | 1.43         |        | 0.70          | 0.93          | 0.98           |        | 33.04          | 63.64           | 2.28           |        | 0.57          | 1.08          | 2.24           |
|                                  | (0.74, 20.87) | (1.99, 24.16) | (1.38, 1.47) | <0.001 | (0.00, 12.84) | (0.00, 12.30) | (0.87, 1.10)   | <0.001 | (17.09, 58.33) | (41.24, 94.35)  | (2.22, 2.35)   | <0.001 | (0.00, 12.65) | (0.00, 12.61) | (2.08, 2.41)   |
|                                  | 7.34          | 8.86          | 0.64         |        | 1.61          | 1.46          | -0.35          |        | 20.37          | 17.86           | -0.45          |        | 0.34          | 0.30          | -0.40          |
| Monaco                           | (0.04, 72.54) | (0.12, 60.12) | (0.60, 0.68) | <0.001 | (0.00, 63.89) | (0.00, 47.09) | (-0.42, -0.28) | <0.001 | (2.36, 91.34)  | (1.65, 74.68)   | (-0.50, -0.40) | <0.001 | (0.00, 61.91) | (0.00, 44.88) | (-0.56, -0.23) |
|                                  | 3.23          | 4.07          | 0.84         |        | 0.27          | 0.35          | 0.89           |        | 4.79           | 4.63            | -0.09          |        | 0.08          | 0.08          | -0.15          |
| Mongolia                         | (2.11, 4.80)  | (3.07, 5.33)  | (0.75, 0.93) | <0.001 | (0.04, 1.06)  | (0.11, 0.89)  | (0.67, 1.11)   | <0.001 | (3.38, 6.65)   | (3.57, 5.94)    | (-0.54, 0.37)  | 0.710  | (0.00, 0.78)  | (0.00, 0.49)  | (-0.61, 0.31)  |
|                                  | 4.68          | 5.69          | 0.69         |        | 0.45          | 0.52          | 0.49           |        | 4.49           | 3.46            | -1.31          |        | 0.08          | 0.06          | -1.28          |
| Montenegro                       | (2.40, 8.24)  | (2.96, 10.02) | (0.63, 0.74) | <0.001 | (0.02, 2.35)  | (0.02, 2.90)  | (0.37, 0.60)   | <0.001 | (2.27, 7.99)   | (1.44, 7.10)    | (-3.24, 0.66)  | 0.190  | (0.00, 1.68)  | (0.00, 2.10)  | (-2.49, -0.06) |
| Morocco                          | 4.75          | 6.48          | 1.08         | <0.001 | 0.60          | 0.76          | 0.86           | <0.001 | 5.95           | 6.12            | 0.07           | 0.676  | 0.10          | 0.10          | -0.21          |

|             |         |         |         |        |         |        |         |        |         |         |         |         |        |         |         |        |
|-------------|---------|---------|---------|--------|---------|--------|---------|--------|---------|---------|---------|---------|--------|---------|---------|--------|
|             | (4.33,  | (6.07,  | (1.04,  |        | (0.45,  | (0.63, | (0.81,  |        | (5.47,  | (5.73,  | (-0.27, | (0.05,  | (0.06, | (-0.52, |         |        |
|             | 5.21)   | 6.90)   | 1.12)   |        | 0.77)   | 0.92)  | 0.91)   |        | 6.45)   | 6.53)   | 0.41)   | 0.19)   | 0.17)  | 0.12)   |         |        |
|             | 3.16    | 4.44    | 1.26    |        | 0.58    | 0.75   | 0.89    |        | 14.80   | 18.65   | 0.80    | 0.25    | 0.31   | 0.73    |         |        |
| Mozambique  | (2.65,  | (4.04,  | (1.08,  | <0.001 | (0.38,  | (0.59, | (0.74,  | <0.001 | (13.66, | (17.80, | (0.64,  | <0.001  | (0.12, | (0.21,  | (0.45,  | <0.001 |
|             | 3.73)   | 4.87)   | 1.44)   |        | 0.86)   | 0.94)  | 1.05)   |        | 16.01)  | 19.52)  | 0.96)   | 0.46)   | 0.45)  | 1.01)   |         |        |
|             | 4.88    | 5.75    | 0.58    |        | 0.87    | 1.04   | 0.62    |        | 45.94   | 35.94   | -0.85   | 0.77    | 0.60   | -0.85   |         |        |
| Myanmar     | (4.54,  | (5.44,  | (0.56,  | <0.001 | (0.74,  | (0.91, | (0.55,  | <0.001 | (44.91, | (35.16, | (-1.05, | <0.001  | (0.64, | (0.50,  | (-1.06, | <0.001 |
|             | 5.23)   | 6.08)   | 0.61)   |        | 1.03)   | 1.19)  | 0.69)   |        | 47.00)  | 36.75)  | -0.64)  | 0.91)   | 0.71)  | -0.65)  |         |        |
|             | 4.63    | 5.37    | 0.51    |        | 1.14    | 1.22   | 0.24    |        | 24.62   | 21.40   | -0.42   | 0.41    | 0.35   | -0.45   |         |        |
| Namibia     | (2.96,  | (4.04,  | (0.46,  | <0.001 | (0.43,  | (0.64, | (0.17,  | <0.001 | (20.48, | (18.63, | (-0.76, | 0.014   | (0.05, | (0.08,  | (-0.97, | 0.087  |
|             | 6.99)   | 7.04)   | 0.56)   |        | 2.61)   | 2.15)  | 0.31)   |        | 29.42)  | 24.49)  | -0.09)  | 1.62)   | 1.00)  | 0.07)   |         |        |
|             | 7.81    | 10.03   | 0.85    |        | 0.94    | 1.13   | 0.64    |        | 51.23   | 71.42   | 1.14    | 0.87    | 1.21   | 1.15    |         |        |
| Nauru       | (0.00,  | (0.00,  | (0.82,  | <0.001 | (0.00,  | (0.00, | (0.53,  | <0.001 | (6.20,  | (15.45, | (1.04,  | <0.001  | (0.00, | (0.00,  | (0.95,  | <0.001 |
|             | 118.41) | 111.75) | 0.89)   |        | 105.49) | 95.30) | 0.75)   |        | 191.21) | 209.81) | 1.24)   | 105.40) | 95.50) | 1.35)   |         |        |
|             | 2.80    | 3.81    | 1.10    |        | 0.28    | 0.37   | 0.97    |        | 6.69    | 7.23    | 0.28    | 0.11    | 0.12   | 0.33    |         |        |
| Nepal       | (2.42,  | (3.47,  | (1.02,  | <0.001 | (0.17,  | (0.27, | (0.76,  | <0.001 | (6.09,  | (6.77,  | (0.16,  | <0.001  | (0.05, | (0.07,  | (-0.52, | 0.449  |
|             | 3.23)   | 4.17)   | 1.18)   |        | 0.44)   | 0.49)  | 1.19)   |        | 7.34)   | 7.73)   | 0.41)   | 0.23)   | 0.20)  | 1.17)   |         |        |
|             | 5.54    | 7.33    | 0.97    |        | 1.11    | 1.16   | 0.16    |        | 3.61    | 6.53    | 2.10    | 0.06    | 0.11   | 2.44    |         |        |
| Netherlands | (4.96,  | (6.62,  | (0.93,  | <0.001 | (0.86,  | (0.89, | (0.11,  | <0.001 | (3.15,  | (5.87,  | (1.76,  | <0.001  | (0.02, | (0.04,  | (1.94,  | <0.001 |
|             | 6.17)   | 8.10)   | 1.01)   |        | 1.41)   | 1.49)  | 0.22)   |        | 4.12)   | 7.26)   | 2.43)   | 0.17)   | 0.25)  | 2.93)   |         |        |
|             | 7.61    | 5.73    | -0.98   |        | 1.00    | 0.76   | -0.94   |        | 5.92    | 5.01    | -0.58   | 0.10    | 0.08   | -0.59   |         |        |
| New Zealand | (6.23,  | (4.55,  | (-1.05, | <0.001 | (0.55,  | (0.38, | (-1.07, | <0.001 | (4.71,  | (3.92,  | (-1.31, | 0.123   | (0.01, | (0.00,  | (-1.17, | 0.044  |
|             | 9.21)   | 7.12)   | -0.91)  |        | 1.69)   | 1.38)  | -0.81)  |        | 7.35)   | 6.33)   | 0.16)   | 0.45)   | 0.43)  | -0.02)  |         |        |
|             | 4.43    | 6.78    | 1.47    |        | 0.64    | 0.98   | 1.47    |        | 14.43   | 10.39   | -1.42   | 0.24    | 0.17   | -1.55   |         |        |
| Nicaragua   | (3.37,  | (5.85,  | (1.44,  | <0.001 | (0.29,  | (0.65, | (1.42,  | <0.001 | (12.46, | (9.23,  | (-1.97, | <0.001  | (0.05, | (0.05,  | (-2.26, | <0.001 |
|             | 5.75)   | 7.83)   | 1.50)   |        | 1.26)   | 1.43)  | 1.53)   |        | 16.65)  | 11.66)  | -0.86)  | 0.73)   | 0.41)  | -0.84)  |         |        |
|             | 3.17    | 3.89    | 0.78    |        | 0.62    | 0.73   | 0.62    |        | 15.46   | 12.57   | -0.69   | 0.26    | 0.21   | -0.75   |         |        |
| Niger       | (2.53,  | (3.45,  | (0.60,  | <0.001 | (0.35,  | (0.55, | (0.46,  | <0.001 | (13.95, | (11.74, | (-0.97, | <0.001  | (0.10, | (0.12,  | (-1.24, | 0.003  |
|             | 3.94)   | 4.37)   | 0.97)   |        | 1.02)   | 0.97)  | 0.78)   |        | 17.11)  | 13.45)  | -0.40)  | 0.58)   | 0.36)  | -0.26)  |         |        |
|             | 4.10    | 4.38    | 0.31    |        | 0.89    | 1.00   | 0.45    |        | 17.30   | 9.56    | -2.04   | 0.30    | 0.16   | -2.24   |         |        |
| Nigeria     | (3.88,  | (4.23,  | (0.15,  | <0.001 | (0.79,  | (0.93, | (0.33,  | <0.001 | (16.84, | (9.34,  | (-2.20, | <0.001  | (0.24, | (0.13,  | (-2.79, | <0.001 |
|             | 4.33)   | 4.52)   | 0.47)   |        | 1.00)   | 1.07)  | 0.57)   |        | 17.78)  | 9.78)   | -1.87)  | 0.37)   | 0.19)  | -1.69)  |         |        |
| Niue        | 7.21    | 9.76    | 1.06    | <0.001 | 1.14    | 1.40   | 0.68    | <0.001 | 34.68   | 37.14   | 0.23    | 0.041   | 0.59   | 0.62    | 0.15    | 0.516  |

|                          |                |                |                |        |                |                |                |        |                |                |                |        |                |                |                |
|--------------------------|----------------|----------------|----------------|--------|----------------|----------------|----------------|--------|----------------|----------------|----------------|--------|----------------|----------------|----------------|
|                          | (0.00, 531.91) | (0.00, 751.20) | (0.90, 1.23)   |        | (0.00, 519.98) | (0.00, 734.85) | (0.52, 0.84)   |        | (0.00, 584.97) | (0.00, 803.55) | (0.01, 0.46)   |        | (0.00, 518.93) | (0.00, 733.34) | (-0.30, 0.61)  |
|                          | 3.93           | 5.18           | 0.97           |        | 0.40           | 0.49           | 0.73           |        | 5.66           | 4.36           | -0.91          |        | 0.10           | 0.07           | -1.07          |
| North Macedonia          | (2.69, 5.56)   | (3.71, 7.11)   | (0.92, 1.03)   | <0.001 | (0.09, 1.13)   | (0.13, 1.40)   | (0.54, 0.91)   | <0.001 | (4.14, 7.54)   | (3.04, 6.14)   | (-1.66, -0.15) | 0.019  | (0.00, 0.65)   | (0.00, 0.78)   | (-2.43, 0.31)  |
|                          | 6.15           | 8.01           | 0.85           |        | 0.88           | 1.05           | 0.56           |        | 11.99          | 16.50          | 1.09           |        | 0.20           | 0.28           | 1.07           |
| Northern Mariana Islands | (0.41, 30.04)  | (0.16, 56.38)  | (0.66, 1.04)   | <0.001 | (0.00, 21.48)  | (0.00, 45.21)  | (0.30, 0.81)   | <0.001 | (2.40, 38.56)  | (1.66, 70.22)  | (0.39, 1.79)   | 0.002  | (0.00, 20.28)  | (0.00, 44.00)  | (0.10, 2.06)   |
|                          | 9.12           | 6.94           | -0.95          |        | 1.29           | 1.21           | -0.23          |        | 4.13           | 4.47           | 0.25           |        | 0.07           | 0.08           | 0.27           |
| Norway                   | (7.71, 10.73)  | (5.78, 8.29)   | (-1.04, -0.85) | <0.001 | (0.80, 1.99)   | (0.76, 1.86)   | (-0.33, -0.13) | <0.001 | (3.21, 5.25)   | (3.57, 5.55)   | (-0.17, 0.68)  | 0.245  | (0.00, 0.38)   | (0.01, 0.38)   | (-0.39, 0.93)  |
|                          | 5.29           | 7.18           | 1.06           |        | 0.87           | 1.12           | 0.88           |        | 8.76           | 8.51           | -0.04          |        | 0.14           | 0.14           | -0.02          |
| Oman                     | (3.82, 7.15)   | (6.14, 8.41)   | (0.95, 1.17)   | <0.001 | (0.35, 1.81)   | (0.74, 1.71)   | (0.73, 1.02)   | <0.001 | (6.83, 11.09)  | (7.33, 9.86)   | (-0.57, 0.49)  | 0.889  | (0.01, 0.76)   | (0.03, 0.50)   | (-0.56, 0.53)  |
|                          | 3.30           | 4.74           | 1.28           |        | 0.33           | 0.45           | 1.07           |        | 11.02          | 17.71          | 1.65           |        | 0.19           | 0.30           | 1.62           |
| Pakistan                 | (3.12, 3.49)   | (4.60, 4.89)   | (1.17, 1.39)   | <0.001 | (0.28, 0.40)   | (0.41, 0.50)   | (0.94, 1.20)   | <0.001 | (10.68, 11.37) | (17.43, 18.00) | (1.52, 1.77)   | <0.001 | (0.15, 0.24)   | (0.26, 0.34)   | (1.25, 1.98)   |
|                          | 5.53           | 6.37           | 0.51           |        | 0.75           | 0.83           | 0.33           |        | 15.33          | 14.80          | -0.15          |        | 0.26           | 0.25           | -0.16          |
| Palau                    | (0.00, 69.29)  | (0.00, 80.57)  | (0.39, 0.64)   | <0.001 | (0.00, 60.34)  | (0.00, 70.42)  | (0.27, 0.40)   | <0.001 | (0.45, 86.44)  | (0.28, 94.99)  | (-0.34, 0.04)  | 0.113  | (0.00, 59.40)  | (0.00, 69.31)  | (-0.39, 0.07)  |
|                          | 5.21           | 6.61           | 0.83           |        | 0.68           | 0.81           | 0.63           |        | 6.06           | 3.76           | -1.71          |        | 0.10           | 0.06           | -1.96          |
| Palestine                | (3.63, 7.33)   | (5.52, 7.87)   | (0.78, 0.88)   | <0.001 | (0.21, 1.78)   | (0.47, 1.34)   | (0.53, 0.72)   | <0.001 | (4.35, 8.30)   | (2.95, 4.74)   | (-2.21, -1.21) | <0.001 | (0.00, 0.94)   | (0.00, 0.34)   | (-2.97, -0.95) |
|                          | 4.73           | 7.45           | 1.57           |        | 0.63           | 0.92           | 1.27           |        | 14.67          | 18.61          | 0.93           |        | 0.24           | 0.30           | 0.93           |
| Panama                   | (3.45, 6.35)   | (6.17, 8.92)   | (1.51, 1.63)   | <0.001 | (0.24, 1.40)   | (0.51, 1.53)   | (1.20, 1.34)   | <0.001 | (12.38, 17.27) | (16.55, 20.85) | (0.31, 1.55)   | 0.003  | (0.04, 0.85)   | (0.10, 0.72)   | (0.00, 1.87)   |
|                          | 4.17           | 5.36           | 0.89           |        | 0.44           | 0.55           | 0.78           |        | 14.68          | 23.28          | 1.54           |        | 0.25           | 0.39           | 1.51           |
| Papua New Guinea         | (3.23, 5.34)   | (4.67, 6.13)   | (0.83, 0.95)   | <0.001 | (0.18, 0.94)   | (0.34, 0.83)   | (0.58, 0.98)   | <0.001 | (12.81, 16.76) | (21.81, 24.84) | (1.28, 1.80)   | <0.001 | (0.06, 0.69)   | (0.22, 0.65)   | (1.22, 1.80)   |
|                          | 4.62           | 7.19           | 1.54           |        | 0.83           | 1.19           | 1.25           |        | 14.51          | 18.94          | 0.98           |        | 0.24           | 0.32           | 0.99           |
| Paraguay                 | (3.59, 5.85)   | (6.25, 8.23)   | (1.49, 1.59)   | <0.001 | (0.44, 1.44)   | (0.83, 1.66)   | (1.21, 1.30)   | <0.001 | (12.65, 16.59) | (17.40, 20.58) | (0.36, 1.61)   | 0.002  | (0.06, 0.67)   | (0.15, 0.60)   | (0.36, 1.62)   |
|                          | 3.79           | 6.38           | 1.82           | <0.001 | 0.53           | 0.87           | 1.74           | <0.001 | 18.02          | 10.91          | -1.63          | <0.001 | 0.30           | 0.18           | -1.59          |



|                     |        |         |         |        |        |        |         |        |         |         |         |        |        |        |         |        |
|---------------------|--------|---------|---------|--------|--------|--------|---------|--------|---------|---------|---------|--------|--------|--------|---------|--------|
|                     | (3.38, | (5.97,  | (1.76,  |        | (0.39, | (0.72, | (1.64,  |        | (17.12, | (10.36, | (-2.53, |        | (0.19, | (0.12, | (-2.80, |        |
|                     | 4.24)  | 6.82)   | 1.88)   |        | 0.71)  | 1.05)  | 1.83)   |        | 18.95)  | 11.48)  | -0.72)  |        | 0.44)  | 0.27)  | -0.36)  |        |
|                     | 4.13   | 7.45    | 2.07    |        | 0.92   | 1.20   | 0.92    |        | 9.30    | 41.14   | 5.38    |        | 0.16   | 0.69   | 5.33    |        |
| Philippines         | (3.88, | (7.20,  | (1.99,  | <0.001 | (0.80, | (1.10, | (0.83,  | <0.001 | (8.91,  | (40.55, | (4.43,  | <0.001 | (0.11, | (0.62, | (4.94,  | <0.001 |
|                     | 4.39)  | 7.71)   | 2.14)   |        | 1.05)  | 1.30)  | 1.00)   |        | 9.69)   | 41.74)  | 6.35)   |        | 0.22)  | 0.77)  | 5.73)   |        |
|                     | 4.72   | 5.10    | 0.28    |        | 0.72   | 0.78   | 0.27    |        | 7.61    | 10.10   | 0.95    |        | 0.13   | 0.17   | 0.91    |        |
| Poland              | (4.37, | (4.71,  | (0.23,  | <0.001 | (0.59, | (0.63, | (0.14,  | <0.001 | (7.17,  | (9.58,  | (0.42,  | <0.001 | (0.08, | (0.11, | (0.37,  | 0.001  |
|                     | 5.09)  | 5.52)   | 0.33)   |        | 0.88)  | 0.95)  | 0.40)   |        | 8.07)   | 10.66)  | 1.48)   |        | 0.20)  | 0.27)  | 1.45)   |        |
|                     | 5.39   | 9.00    | 1.78    |        | 1.45   | 1.48   | 0.06    |        | 10.04   | 11.72   | 0.63    |        | 0.17   | 0.20   | 0.71    |        |
| Portugal            | (4.67, | (7.97,  | (1.71,  | <0.001 | (1.09, | (1.08, | (-0.02, | 0.125  | (9.05,  | (10.54, | (-0.16, | 0.117  | (0.06, | (0.07, | (-0.27, | 0.154  |
|                     | 6.19)  | 10.13)  | 1.85)   |        | 1.89)  | 1.99)  | 0.13)   |        | 11.11)  | 12.99)  | 1.42)   |        | 0.36)  | 0.44)  | 1.70)   |        |
|                     | 6.28   | 11.17   | 1.99    |        | 1.18   | 1.59   | 1.02    |        | 19.90   | 22.96   | 0.47    |        | 0.34   | 0.39   | 0.46    |        |
| Puerto Rico         | (5.04, | (9.31,  | (1.93,  | <0.001 | (0.68, | (0.95, | (0.93,  | <0.001 | (17.62, | (20.26, | (-0.41, | 0.296  | (0.10, | (0.12, | (-0.43, | 0.312  |
|                     | 7.75)  | 13.29)  | 2.04)   |        | 1.91)  | 2.53)  | 1.11)   |        | 22.39)  | 25.91)  | 1.36)   |        | 0.81)  | 0.97)  | 1.37)   |        |
|                     | 6.05   | 7.84    | 0.91    |        | 1.28   | 1.26   | -0.08   |        | 7.36    | 4.51    | -1.67   |        | 0.12   | 0.07   | -1.71   |        |
| Qatar               | (3.27, | (6.41,  | (0.87,  | <0.001 | (0.27, | (0.75, | (-0.19, | 0.157  | (4.24,  | (3.48,  | (-2.13, | <0.001 | (0.00, | (0.00, | (-2.40, | <0.001 |
|                     | 10.82) | 9.67)   | 0.96)   |        | 4.62)  | 2.25)  | 0.03)   |        | 12.45)  | 5.95)   | -1.21)  |        | 3.04)  | 0.84)  | -1.01)  |        |
|                     | 5.34   | 5.39    | 0.01    |        | 1.85   | 1.63   | -0.46   |        | 20.65   | 4.78    | -4.89   |        | 0.34   | 0.08   | -5.04   |        |
| Republic of Korea   | (5.03, | (5.05,  | (-0.06, | 0.765  | (1.67, | (1.44, | (-0.56, | <0.001 | (20.04, | (4.47,  | (-5.81, | <0.001 | (0.27, | (0.04, | (-5.75, | <0.001 |
|                     | 5.66)  | 5.74)   | 0.08)   |        | 2.04)  | 1.83)  | -0.35)  |        | 21.28)  | 5.11)   | -3.97)  |        | 0.43)  | 0.14)  | -4.33)  |        |
|                     | 5.23   | 7.46    | 1.26    |        | 0.57   | 0.78   | 1.10    |        | 9.09    | 13.12   | 1.01    |        | 0.15   | 0.22   | 1.05    |        |
| Republic of Moldova | (4.22, | (6.06,  | (1.07,  | <0.001 | (0.27, | (0.38, | (0.84,  | <0.001 | (7.75,  | (11.28, | (0.50,  | <0.001 | (0.03, | (0.05, | (0.46,  | 0.001  |
|                     | 6.43)  | 9.12)   | 1.45)   |        | 1.07)  | 1.49)  | 1.36)   |        | 10.62)  | 15.22)  | 1.53)   |        | 0.50)  | 0.74)  | 1.65)   |        |
|                     | 4.97   | 6.65    | 1.00    |        | 0.48   | 0.61   | 0.83    |        | 4.21    | 7.94    | 2.25    |        | 0.07   | 0.13   | 2.14    |        |
| Romania             | (4.51, | (5.99,  | (0.96,  | <0.001 | (0.34, | (0.43, | (0.70,  | <0.001 | (3.79,  | (7.22,  | (1.92,  | <0.001 | (0.03, | (0.06, | (1.65,  | <0.001 |
|                     | 5.47)  | 7.35)   | 1.05)   |        | 0.65)  | 0.86)  | 0.95)   |        | 4.68)   | 8.71)   | 2.58)   |        | 0.16)  | 0.27)  | 2.64)   |        |
|                     | 5.56   | 12.04   | 2.68    |        | 0.60   | 1.11   | 2.12    |        | 16.08   | 48.49   | 3.90    |        | 0.27   | 0.84   | 4.00    |        |
| Russian Federation  | (5.37, | (11.74, | (2.49,  | <0.001 | (0.54, | (1.01, | (1.96,  | <0.001 | (15.76, | (47.89, | (2.48,  | <0.001 | (0.23, | (0.76, | (2.63,  | <0.001 |
|                     | 5.75)  | 12.36)  | 2.87)   |        | 0.67)  | 1.21)  | 2.28)   |        | 16.41)  | 49.10)  | 5.35)   |        | 0.31)  | 0.92)  | 5.40)   |        |
|                     | 4.83   | 4.38    | -0.31   |        | 0.82   | 0.88   | 0.24    |        | 35.21   | 22.56   | -1.55   |        | 0.59   | 0.38   | -1.55   |        |
| Rwanda              | (4.02, | (3.83,  | (-0.48, | <0.001 | (0.51, | (0.65, | (0.11,  | <0.001 | (32.93, | (21.28, | (-1.67, | <0.001 | (0.33, | (0.23, | (-1.77, | <0.001 |
|                     | 5.77)  | 4.99)   | -0.13)  |        | 1.27)  | 1.18)  | 0.38)   |        | 37.60)  | 23.90)  | -1.44)  |        | 0.99)  | 0.60)  | -1.32)  |        |
| Saint Kitts and     | 5.92   | 9.11    | 1.49    | <0.001 | 0.72   | 1.00   | 1.15    | <0.001 | 21.88   | 9.65    | -2.83   | <0.001 | 0.37   | 0.16   | -2.94   | <0.001 |

|                                     |        |        |        |        |        |        |         |        |         |         |         |        |        |        |         |        |
|-------------------------------------|--------|--------|--------|--------|--------|--------|---------|--------|---------|---------|---------|--------|--------|--------|---------|--------|
| Nevis                               | (0.15, | (1.19, | (1.45, |        | (0.00, | (0.00, | (1.06,  |        | (5.44,  | (1.34,  | (-3.58, |        | (0.00, | (0.00, | (-3.83, |        |
|                                     | 36.06) | 33.52) | 1.54)  |        | 27.03) | 20.09) | 1.24)   |        | 60.59)  | 34.44)  | -2.08)  |        | 26.41) | 18.52) | -2.05)  |        |
|                                     | 7.69   | 14.82  | 2.27   |        | 1.35   | 1.93   | 1.24    |        | 38.77   | 50.21   | 0.92    |        | 0.66   | 0.86   | 0.94    |        |
| Saint Lucia                         | (2.02, | (7.16, | (2.22, | <0.001 | (0.01, | (0.10, | (1.16,  | <0.001 | (23.40, | (34.86, | (0.54,  | <0.001 | (0.00, | (0.00, | (0.50,  | <0.001 |
|                                     | 21.21) | 27.40) | 2.32)  |        | 11.61) | 9.40)  | 1.33)   |        | 61.23)  | 70.23)  | 1.31)   |        | 10.54) | 7.57)  | 1.38)   |        |
|                                     | 5.41   | 9.11   | 1.83   |        | 0.67   | 0.98   | 1.36    |        | 12.15   | 18.23   | 1.45    |        | 0.20   | 0.31   | 1.50    |        |
| Saint Vincent and<br>the Grenadines | (0.79, | (2.38, | (1.76, | <0.001 | (0.00, | (0.00, | (1.29,  | <0.001 | (3.96,  | (7.70,  | (0.71,  | <0.001 | (0.00, | (0.00, | (0.63,  | 0.001  |
|                                     | 20.30) | 24.02) | 1.90)  |        | 12.92) | 11.08) | 1.43)   |        | 29.94)  | 36.64)  | 2.19)   |        | 12.16) | 9.80)  | 2.37)   |        |
|                                     | 5.96   | 8.74   | 1.34   |        | 0.92   | 1.16   | 0.79    |        | 26.66   | 42.90   | 1.66    |        | 0.45   | 0.73   | 1.67    |        |
| Samoa                               | (1.44, | (3.44, | (1.30, | <0.001 | (0.00, | (0.02, | (0.69,  | <0.001 | (14.88, | (29.43, | (1.56,  | <0.001 | (0.00, | (0.00, | (1.54,  | <0.001 |
|                                     | 17.54) | 18.70) | 1.38)  |        | 9.97)  | 7.67)  | 0.89)   |        | 44.88)  | 60.73)  | 1.76)   |        | 9.26)  | 7.00)  | 1.79)   |        |
|                                     | 6.01   | 7.29   | 0.67   |        | 1.62   | 1.43   | -0.46   |        | 7.34    | 8.09    | 0.34    |        | 0.12   | 0.14   | 0.47    |        |
| San Marino                          | (0.01, | (0.07, | (0.65, | <0.001 | (0.00, | (0.00, | (-0.53, | <0.001 | (0.03,  | (0.12,  | (0.21,  | <0.001 | (0.00, | (0.00, | (-0.11, | 0.112  |
|                                     | 55.17) | 52.56) | 0.68)  |        | 46.96) | 42.07) | -0.39)  |        | 57.55)  | 53.86)  | 0.46)   |        | 44.03) | 39.59) | 1.05)   |        |
|                                     | 3.49   | 4.87   | 1.16   |        | 0.75   | 0.94   | 0.80    |        | 14.47   | 15.89   | 0.37    |        | 0.25   | 0.27   | 0.31    |        |
| Sao Tome and<br>Principe            | (0.20, | (1.36, | (1.11, | <0.001 | (0.00, | (0.01, | (0.71,  | <0.001 | (4.64,  | (8.48,  | (-1.06, | 0.614  | (0.00, | (0.00, | (-0.98, | 0.641  |
|                                     | 19.13) | 12.63) | 1.21)  |        | 14.91) | 6.64)  | 0.88)   |        | 35.60)  | 27.32)  | 1.81)   |        | 14.16) | 5.46)  | 1.61)   |        |
|                                     | 5.77   | 8.50   | 1.34   |        | 0.91   | 1.21   | 1.01    |        | 10.13   | 11.33   | 0.31    |        | 0.17   | 0.19   | 0.39    |        |
| Saudi Arabia                        | (5.20, | (8.08, | (1.30, | <0.001 | (0.69, | (1.06, | (0.93,  | <0.001 | (9.36,  | (10.86, | (0.12,  | 0.001  | (0.08, | (0.14, | (0.08,  | 0.015  |
|                                     | 6.40)  | 8.93)  | 1.39)  |        | 1.18)  | 1.38)  | 1.08)   |        | 10.96)  | 11.81)  | 0.49)   |        | 0.32)  | 0.27)  | 0.70)   |        |
|                                     | 3.44   | 4.23   | 0.80   |        | 0.72   | 0.79   | 0.34    |        | 14.46   | 12.76   | -0.49   |        | 0.24   | 0.21   | -0.43   |        |
| Senegal                             | (2.76, | (3.72, | (0.68, | <0.001 | (0.43, | (0.58, | (0.20,  | <0.001 | (12.99, | (11.84, | (-1.04, | 0.079  | (0.09, | (0.11, | (-0.98, | 0.121  |
|                                     | 4.25)  | 4.79)  | 0.92)  |        | 1.16)  | 1.07)  | 0.48)   |        | 16.06)  | 13.73)  | 0.06)   |        | 0.56)  | 0.38)  | 0.12)   |        |
|                                     | 3.55   | 5.83   | 1.77   |        | 0.46   | 0.61   | 0.97    |        | 8.45    | 6.24    | -1.08   |        | 0.14   | 0.11   | -0.87   |        |
| Serbia                              | (2.95, | (4.98, | (1.62, | <0.001 | (0.26, | (0.36, | (0.82,  | <0.001 | (7.52,  | (5.37,  | (-1.23, | <0.001 | (0.05, | (0.02, | (-1.12, | <0.001 |
|                                     | 4.24)  | 6.79)  | 1.92)  |        | 0.75)  | 0.98)  | 1.13)   |        | 9.48)   | 7.22)   | -0.93)  |        | 0.34)  | 0.32)  | -0.62)  |        |
|                                     | 7.51   | 8.52   | 0.42   |        | 1.49   | 1.52   | 0.06    |        | 49.34   | 44.17   | -0.29   |        | 0.83   | 0.74   | -0.38   |        |
| Seychelles                          | (1.06, | (1.98, | (0.33, | <0.001 | (0.00, | (0.00, | (-0.03, | 0.216  | (27.31, | (25.92, | (-0.72, | 0.198  | (0.00, | (0.00, | (-0.96, | 0.205  |
|                                     | 28.12) | 24.99) | 0.52)  |        | 18.66) | 14.30) | 0.14)   |        | 83.65)  | 71.31)  | 0.15)   |        | 17.62) | 12.92) | 0.21)   |        |
|                                     | 3.11   | 3.87   | 0.78   |        | 0.67   | 0.77   | 0.51    |        | 12.47   | 12.93   | 0.10    |        | 0.21   | 0.22   | 0.12    |        |
| Sierra Leone                        | (2.23, | (3.24, | (0.70, | <0.001 | (0.31, | (0.50, | (0.44,  | <0.001 | (10.61, | (11.72, | (-0.03, | 0.121  | (0.04, | (0.09, | (-0.07, | 0.228  |
|                                     | 4.23)  | 4.61)  | 0.85)  |        | 1.31)  | 1.14)  | 0.58)   |        | 14.57)  | 14.25)  | 0.23)   |        | 0.68)  | 0.47)  | 0.30)   |        |
| Singapore                           | 4.33   | 6.04   | 1.14   | <0.001 | 1.59   | 1.39   | -0.47   | <0.001 | 7.67    | 9.04    | 0.63    | 0.080  | 0.13   | 0.15   | 0.63    | 0.225  |

|                 |        |        |         |        |        |        |         |        |         |         |         |        |        |        |         |        |
|-----------------|--------|--------|---------|--------|--------|--------|---------|--------|---------|---------|---------|--------|--------|--------|---------|--------|
|                 | (3.34, | (5.03, | (1.00,  |        | (1.03, | (0.92, | (-0.66, |        | (6.35,  | (7.79,  | (-0.07, |        | (0.02, | (0.03, | (-0.39, |        |
|                 | 5.53)  | 7.24)  | 1.27)   |        | 2.39)  | 2.07)  | -0.27)  |        | 9.21)   | 10.48)  | 1.33)   |        | 0.51)  | 0.52)  | 1.66)   |        |
|                 | 5.73   | 6.59   | 0.48    |        | 0.66   | 0.70   | 0.22    |        | 7.30    | 6.47    | -0.46   |        | 0.12   | 0.11   | -0.36   |        |
| Slovakia        | (4.75, | (5.46, | (0.41,  | <0.001 | (0.36, | (0.37, | (0.10,  | <0.001 | (6.19,  | (5.36,  | (-0.77, | 0.003  | (0.02, | (0.01, | (-0.79, | 0.100  |
|                 | 6.87)  | 7.93)  | 0.55)   |        | 1.13)  | 1.26)  | 0.34)   |        | 8.57)   | 7.77)   | -0.15)  |        | 0.41)  | 0.47)  | 0.07)   |        |
|                 | 4.54   | 5.08   | 0.39    |        | 0.60   | 0.59   | -0.08   |        | 5.42    | 3.64    | -1.44   |        | 0.09   | 0.06   | -1.33   |        |
| Slovenia        | (3.17, | (3.44, | (0.28,  | <0.001 | (0.19, | (0.14, | (-0.20, | 0.192  | (3.92,  | (2.27,  | (-2.34, | 0.002  | (0.00, | (0.00, | (-2.40, | 0.017  |
|                 | 6.34)  | 7.34)  | 0.49)   |        | 1.50)  | 1.77)  | 0.04)   |        | 7.34)   | 5.64)   | -0.52)  |        | 0.72)  | 0.97)  | -0.24)  |        |
|                 | 5.11   | 6.98   | 1.09    |        | 0.48   | 0.63   | 0.98    |        | 28.15   | 49.01   | 1.93    |        | 0.49   | 0.84   | 1.90    |        |
| Solomon Islands | (1.85, | (4.11, | (1.06,  | <0.001 | (0.00, | (0.05, | (0.87,  | <0.001 | (18.99, | (40.65, | (1.75,  | <0.001 | (0.00, | (0.11, | (1.71,  | <0.001 |
|                 | 11.79) | 11.16) | 1.13)   |        | 5.06)  | 2.70)  | 1.10)   |        | 40.50)  | 58.64)  | 2.11)   |        | 5.13)  | 3.08)  | 2.10)   |        |
|                 | 3.76   | 3.99   | 0.21    |        | 0.67   | 0.72   | 0.25    |        | 25.83   | 21.17   | -0.67   |        | 0.44   | 0.35   | -0.72   |        |
| Somalia         | (3.03, | (3.55, | (0.06,  | 0.006  | (0.38, | (0.54, | (0.08,  | 0.005  | (23.81, | (20.11, | (-0.81, | <0.001 | (0.21, | (0.23, | (-0.95, | <0.001 |
|                 | 4.64)  | 4.48)  | 0.37)   |        | 1.10)  | 0.95)  | 0.43)   |        | 27.98)  | 22.27)  | -0.52)  |        | 0.81)  | 0.53)  | -0.50)  |        |
|                 | 6.48   | 5.75   | -0.40   |        | 1.70   | 1.56   | -0.29   |        | 55.87   | 27.87   | -2.33   |        | 0.95   | 0.47   | -2.36   |        |
| South Africa    | (6.08, | (5.45, | (-0.51, | <0.001 | (1.50, | (1.40, | (-0.35, | <0.001 | (54.67, | (27.21, | (-3.71, | 0.001  | (0.80, | (0.39, | (-3.82, | 0.002  |
|                 | 6.90)  | 6.06)  | -0.28)  |        | 1.92)  | 1.73)  | -0.22)  |        | 57.09)  | 28.54)  | -0.92)  |        | 1.12)  | 0.56)  | -0.88)  |        |
|                 | 4.04   | 3.93   | -0.04   |        | 0.89   | 0.92   | 0.14    |        | 21.30   | 13.33   | -1.63   |        | 0.36   | 0.22   | -1.69   |        |
| South Sudan     | (3.23, | (3.26, | (-0.14, | 0.403  | (0.54, | (0.61, | (0.04,  | 0.004  | (19.33, | (12.05, | (-1.94, | <0.001 | (0.15, | (0.09, | (-2.05, | <0.001 |
|                 | 5.02)  | 4.70)  | 0.06)   |        | 1.43)  | 1.34)  | 0.23)   |        | 23.44)  | 14.72)  | -1.32)  |        | 0.77)  | 0.48)  | -1.32)  |        |
|                 | 5.52   | 7.10   | 0.87    |        | 1.17   | 1.14   | -0.08   |        | 8.27    | 7.22    | -0.60   |        | 0.14   | 0.12   | -0.56   |        |
| Spain           | (5.15, | (6.65, | (0.86,  | <0.001 | (1.00, | (0.96, | (-0.12, | <0.001 | (7.81,  | (6.77,  | (-1.08, | 0.016  | (0.08, | (0.07, | (-1.33, | 0.152  |
|                 | 5.92)  | 7.57)  | 0.88)   |        | 1.36)  | 1.35)  | -0.04)  |        | 8.75)   | 7.70)   | -0.11)  |        | 0.21)  | 0.20)  | 0.21)   |        |
|                 | 6.92   | 8.64   | 0.74    |        | 1.50   | 1.68   | 0.38    |        | 42.46   | 43.11   | 0.15    |        | 0.72   | 0.73   | 0.14    |        |
| Sri Lanka       | (6.33, | (8.01, | (0.65,  | <0.001 | (1.23, | (1.41, | (0.30,  | <0.001 | (40.98, | (41.69, | (-0.86, | 0.771  | (0.54, | (0.56, | (-0.78, | 0.766  |
|                 | 7.55)  | 9.31)  | 0.84)   |        | 1.81)  | 1.99)  | 0.46)   |        | 43.99)  | 44.56)  | 1.17)   |        | 0.94)  | 0.94)  | 1.06)   |        |
|                 | 4.60   | 5.81   | 0.82    |        | 0.51   | 0.64   | 0.80    |        | 10.53   | 7.25    | -1.29   |        | 0.18   | 0.12   | -1.51   |        |
| Sudan           | (4.12, | (5.45, | (0.74,  | <0.001 | (0.35, | (0.52, | (0.75,  | <0.001 | (9.78,  | (6.84,  | (-1.42, | <0.001 | (0.09, | (0.07, | (-1.84, | <0.001 |
|                 | 5.13)  | 6.19)  | 0.89)   |        | 0.71)  | 0.77)  | 0.85)   |        | 11.32)  | 7.68)   | -1.15)  |        | 0.31)  | 0.19)  | -1.18)  |        |
|                 | 4.78   | 8.25   | 1.92    |        | 0.57   | 0.87   | 1.54    |        | 14.45   | 17.42   | 0.76    |        | 0.24   | 0.29   | 0.78    |        |
| Suriname        | (1.94, | (4.87, | (1.86,  | <0.001 | (0.01, | (0.10, | (1.40,  | <0.001 | (8.98,  | (12.30, | (-0.70, | 0.312  | (0.00, | (0.00, | (-1.05, | 0.406  |
|                 | 10.19) | 13.11) | 1.97)   |        | 4.18)  | 3.32)  | 1.67)   |        | 22.32)  | 24.00)  | 2.24)   |        | 3.66)  | 2.34)  | 2.63)   |        |
| Sweden          | 6.82   | 7.88   | 0.50    | <0.001 | 1.49   | 1.14   | -0.90   | <0.001 | 2.54    | 3.70    | 1.40    | <0.001 | 0.04   | 0.06   | 1.70    | 0.008  |

|                  |         |         |        |        |         |         |         |        |         |         |         |        |         |         |         |        |
|------------------|---------|---------|--------|--------|---------|---------|---------|--------|---------|---------|---------|--------|---------|---------|---------|--------|
|                  | (5.91,  | (6.94,  | (0.41, |        | (1.08,  | (0.80,  | (-1.02, |        | (2.00,  | (3.07,  | (1.03,  |        | (0.00,  | (0.01,  | (0.45,  |        |
|                  | 7.83)   | 8.92)   | 0.59)  |        | 2.00)   | 1.59)   | -0.78)  |        | 3.18)   | 4.42)   | 1.78)   |        | 0.21)   | 0.24)   | 2.98)   |        |
|                  | 5.50    | 6.29    | 0.44   |        | 1.23    | 1.03    | -0.65   |        | 6.34    | 7.61    | 0.47    |        | 0.11    | 0.13    | 0.42    |        |
| Switzerland      | (4.65,  | (5.40,  | (0.35, | <0.001 | (0.85,  | (0.69,  | (-0.88, | <0.001 | (5.44,  | (6.66,  | (-0.18, | 0.154  | (0.02,  | (0.04,  | (0.04,  | 0.030  |
|                  | 6.49)   | 7.30)   | 0.53)  |        | 1.74)   | 1.50)   | -0.41)  |        | 7.38)   | 8.68)   | 1.11)   |        | 0.35)   | 0.38)   | 0.80)   |        |
| Syrian Arab      | 5.22    | 6.83    | 0.96   |        | 0.53    | 0.68    | 0.87    |        | 6.15    | 3.88    | -1.55   |        | 0.10    | 0.06    | -1.94   |        |
| Republic         | (4.56,  | (6.11,  | (0.86, | <0.001 | (0.34,  | (0.47,  | (0.77,  | <0.001 | (5.42,  | (3.34,  | (-1.75, | <0.001 | (0.03,  | (0.01,  | (-3.17, | 0.002  |
|                  | 5.96)   | 7.63)   | 1.05)  |        | 0.81)   | 0.98)   | 0.98)   |        | 6.96)   | 4.50)   | -1.34)  |        | 0.27)   | 0.21)   | -0.70)  |        |
| Taiwan (Province | 5.18    | 6.07    | 0.54   |        | 1.72    | 1.81    | 0.18    |        | 5.90    | 18.52   | 4.09    |        | 0.10    | 0.32    | 4.27    |        |
| of China)        | (4.73,  | (5.54,  | (0.47, | <0.001 | (1.47,  | (1.53,  | (0.10,  | <0.001 | (5.42,  | (17.61, | (2.88,  | <0.001 | (0.04,  | (0.21,  | (3.44,  | <0.001 |
|                  | 5.67)   | 6.64)   | 0.61)  |        | 2.01)   | 2.13)   | 0.26)   |        | 6.41)   | 19.47)  | 5.32)   |        | 0.19)   | 0.47)   | 5.10)   |        |
|                  | 3.22    | 3.84    | 0.63   |        | 0.31    | 0.36    | 0.56    |        | 3.87    | 4.88    | 0.84    |        | 0.07    | 0.08    | 0.61    |        |
| Tajikistan       | (2.47,  | (3.26,  | (0.58, | <0.001 | (0.12,  | (0.20,  | (0.44,  | <0.001 | (3.04,  | (4.22,  | (0.61,  | <0.001 | (0.00,  | (0.02,  | (-0.39, | 0.232  |
|                  | 4.14)   | 4.51)   | 0.68)  |        | 0.71)   | 0.61)   | 0.68)   |        | 4.89)   | 5.62)   | 1.08)   |        | 0.36)   | 0.24)   | 1.60)   |        |
|                  | 8.83    | 10.11   | 0.44   |        | 4.00    | 4.29    | 0.24    |        | 71.75   | 73.22   | 0.18    |        | 1.22    | 1.22    | 0.11    |        |
| Thailand         | (8.47,  | (9.71,  | (0.25, | <0.001 | (3.76,  | (4.04,  | (0.19,  | <0.001 | (70.70, | (72.16, | (-0.52, | 0.621  | (1.08,  | (1.09,  | (-0.59, | 0.755  |
|                  | 9.21)   | 10.51)  | 0.63)  |        | 4.25)   | 4.56)   | 0.28)   |        | 72.81)  | 74.30)  | 0.87)   |        | 1.36)   | 1.37)   | 0.81)   |        |
|                  | 3.76    | 5.53    | 1.35   |        | 0.67    | 0.90    | 1.03    |        | 13.96   | 22.05   | 1.71    |        | 0.24    | 0.37    | 1.67    |        |
| Timor-Leste      | (1.91,  | (3.61,  | (1.25, | <0.001 | (0.08,  | (0.26,  | (0.94,  | <0.001 | (10.06, | (18.02, | (0.92,  | <0.001 | (0.00,  | (0.03,  | (0.98,  | <0.001 |
|                  | 6.77)   | 8.21)   | 1.45)  |        | 2.56)   | 2.41)   | 1.12)   |        | 18.95)  | 26.81)  | 2.52)   |        | 1.89)   | 1.65)   | 2.35)   |        |
|                  | 3.53    | 4.22    | 0.68   |        | 0.71    | 0.79    | 0.40    |        | 17.57   | 12.96   | -1.06   |        | 0.30    | 0.22    | -1.06   |        |
| Togo             | (2.58,  | (3.53,  | (0.52, | <0.001 | (0.32,  | (0.51,  | (0.26,  | <0.001 | (15.30, | (11.71, | (-1.24, | <0.001 | (0.07,  | (0.08,  | (-1.38, | <0.001 |
|                  | 4.75)   | 5.01)   | 0.83)  |        | 1.39)   | 1.17)   | 0.54)   |        | 20.12)  | 14.31)  | -0.88)  |        | 0.85)   | 0.47)   | -0.73)  |        |
|                  | 6.46    | 9.14    | 1.20   |        | 0.94    | 1.20    | 0.84    |        | 33.55   | 46.63   | 1.16    |        | 0.58    | 0.79    | 1.13    |        |
| Tokelau          | (0.00,  | (0.00,  | (1.13, | <0.001 | (0.00,  | (0.00,  | (0.72,  | <0.001 | (0.00,  | (0.00,  | (0.89,  | <0.001 | (0.00,  | (0.00,  | (0.82,  | <0.001 |
|                  | 832.54) | 904.68) | 1.27)  |        | 822.56) | 889.54) | 0.96)   |        | 882.30) | 974.54) | 1.43)   |        | 821.95) | 888.77) | 1.45)   |        |
|                  | 5.83    | 7.32    | 0.81   |        | 1.41    | 1.57    | 0.37    |        | 16.29   | 25.96   | 1.64    |        | 0.28    | 0.44    | 1.59    |        |
| Tonga            | (0.64,  | (1.32,  | (0.72, | <0.001 | (0.00,  | (0.00,  | (0.32,  | <0.001 | (5.23,  | (12.07, | (1.51,  | <0.001 | (0.00,  | (0.00,  | (1.34,  | <0.001 |
|                  | 24.72)  | 23.43)  | 0.90)  |        | 17.87)  | 14.22)  | 0.42)   |        | 40.14)  | 49.25)  | 1.77)   |        | 16.06)  | 12.20)  | 1.83)   |        |
|                  | 5.83    | 9.78    | 1.81   |        | 0.70    | 1.03    | 1.35    |        | 19.15   | 19.26   | 0.05    |        | 0.33    | 0.33    | 0.09    |        |
| Trinidad and     | (3.90,  | (7.29,  | (1.76, | <0.001 | (0.16,  | (0.35,  | (1.24,  | <0.001 | (15.46, | (15.77, | (-0.28, | 0.759  | (0.03,  | (0.04,  | (-0.50, | 0.759  |
| Tobago           | 8.43)   | 12.93)  | 1.86)  |        | 1.96)   | 2.45)   | 1.45)   |        | 23.49)  | 23.37)  | 0.39)   |        | 1.42)   | 1.43)   | 0.69)   |        |
| Tunisia          | 5.00    | 6.93    | 1.14   | <0.001 | 0.75    | 0.96    | 0.88    | <0.001 | 6.95    | 6.43    | -0.26   | 0.003  | 0.12    | 0.11    | -0.25   | 0.569  |

|                              |                |                |                |        |                |               |                |        |                |                |                |              |                |               |                |        |
|------------------------------|----------------|----------------|----------------|--------|----------------|---------------|----------------|--------|----------------|----------------|----------------|--------------|----------------|---------------|----------------|--------|
|                              | (4.26, 5.84)   | (6.18, 7.75)   | (1.10, 1.18)   |        | (0.48, 1.13)   | (0.69, 1.30)  | (0.76, 1.00)   |        | (6.06, 7.94)   | (5.72, 7.22)   | (-0.43, -0.09) | (0.03, 0.33) | (0.04, 0.26)   | (-1.11, 0.61) |                |        |
|                              | 7.09           | 7.56           | 0.20           |        | 1.44           | 1.35          | -0.23          |        | 15.22          | 7.06           | -2.62          | 0.26         | 0.12           | -2.62         |                |        |
| Turkey                       | (6.75, 7.44)   | (7.27, 7.86)   | (0.14, 0.26)   | <0.001 | (1.29, 1.60)   | (1.23, 1.48)  | (-0.30, -0.15) | <0.001 | (14.72, 15.73) | (6.78, 7.34)   | (-3.09, -2.14) | <0.001       | (0.20, 0.33)   | (0.09, 0.16)  | (-3.23, -2.00) | <0.001 |
|                              | 3.11           | 3.89           | 0.79           |        | 0.26           | 0.32          | 0.84           |        | 2.90           | 8.84           | 4.03           |              | 0.05           | 0.15          | 4.05           |        |
| Turkmenistan                 | (2.28, 4.19)   | (3.08, 4.85)   | (0.73, 0.84)   | <0.001 | (0.07, 0.72)   | (0.12, 0.69)  | (0.58, 1.10)   | <0.001 | (2.08, 3.94)   | (7.60, 10.23)  | (3.45, 4.62)   | <0.001       | (0.00, 0.40)   | (0.03, 0.44)  | (3.50, 4.60)   | <0.001 |
|                              | 6.46           | 8.25           | 0.84           |        | 0.83           | 0.99          | 0.59           |        | 38.69          | 52.86          | 1.09           |              | 0.66           | 0.90          | 1.07           |        |
| Tuvalu                       | (0.00, 121.27) | (0.00, 104.92) | (0.82, 0.87)   | <0.001 | (0.00, 110.23) | (0.00, 91.52) | (0.55, 0.63)   | <0.001 | (2.31, 178.06) | (8.47, 177.83) | (0.99, 1.18)   | <0.001       | (0.00, 109.90) | (0.00, 91.38) | (0.88, 1.25)   | <0.001 |
|                              | 3.50           | 4.24           | 0.71           |        | 0.83           | 0.90          | 0.30           |        | 16.21          | 20.82          | 0.78           |              | 0.27           | 0.35          | 0.71           |        |
| Uganda                       | (3.03, 4.02)   | (3.92, 4.59)   | (0.62, 0.80)   | <0.001 | (0.61, 1.10)   | (0.75, 1.07)  | (0.20, 0.41)   | <0.001 | (15.15, 17.32) | (20.07, 21.59) | (0.40, 1.17)   | <0.001       | (0.15, 0.46)   | (0.26, 0.47)  | (0.46, 0.97)   | <0.001 |
|                              | 5.77           | 10.99          | 2.30           |        | 0.58           | 0.98          | 1.84           |        | 12.10          | 34.62          | 3.59           |              | 0.21           | 0.59          | 3.58           |        |
| Ukraine                      | (5.44, 6.12)   | (10.45, 11.54) | (2.09, 2.50)   | <0.001 | (0.48, 0.70)   | (0.83, 1.16)  | (1.58, 2.09)   | <0.001 | (11.62, 12.60) | (33.70, 35.57) | (1.43, 5.79)   | 0.001        | (0.15, 0.28)   | (0.48, 0.73)  | (1.41, 5.80)   | 0.001  |
|                              | 6.09           | 7.48           | 0.71           |        | 0.95           | 1.08          | 0.42           |        | 10.41          | 10.91          | 0.16           |              | 0.17           | 0.18          | -0.07          |        |
| United Arab Emirates         | (4.60, 8.02)   | (6.50, 8.60)   | (0.63, 0.78)   | <0.001 | (0.43, 1.97)   | (0.73, 1.58)  | (0.35, 0.50)   | <0.001 | (8.44, 12.81)  | (9.77, 12.18)  | (-0.08, 0.39)  | 0.187        | (0.02, 0.93)   | (0.07, 0.48)  | (-0.60, 0.46)  | 0.791  |
|                              | 7.27           | 6.89           | -0.18          |        | 1.01           | 1.03          | 0.09           |        | 3.41           | 7.70           | 2.93           |              | 0.06           | 0.13          | 2.72           |        |
| United Kingdom               | (6.91, 7.64)   | (6.55, 7.24)   | (-0.30, -0.06) | 0.003  | (0.87, 1.15)   | (0.90, 1.17)  | (-0.10, 0.28)  | 0.363  | (3.17, 3.67)   | (7.34, 8.07)   | (2.47, 3.40)   | <0.001       | (0.03, 0.10)   | (0.09, 0.19)  | (1.87, 3.57)   | <0.001 |
|                              | 3.89           | 4.18           | 0.30           |        | 0.85           | 0.97          | 0.48           |        | 23.18          | 18.24          | -0.78          |              | 0.39           | 0.30          | -0.84          |        |
| United Republic of Tanzania  | (3.49, 4.33)   | (3.91, 4.47)   | (0.22, 0.38)   | <0.001 | (0.67, 1.07)   | (0.84, 1.12)  | (0.42, 0.54)   | <0.001 | (22.17, 24.22) | (17.66, 18.84) | (-1.06, -0.50) | <0.001       | (0.27, 0.55)   | (0.23, 0.39)  | (-1.12, -0.56) | <0.001 |
|                              | 6.31           | 5.61           | -0.38          |        | 2.85           | 2.96          | 0.17           |        | 7.62           | 12.79          | 1.83           |              | 0.13           | 0.22          | 1.82           |        |
| United States of America     | (6.16, 6.47)   | (5.47, 5.75)   | (-0.44, -0.32) | <0.001 | (2.74, 2.95)   | (2.86, 3.06)  | (0.02, 0.33)   | 0.031  | (7.45, 7.78)   | (12.58, 13.00) | (1.51, 2.16)   | <0.001       | (0.11, 0.15)   | (0.19, 0.25)  | (1.34, 2.30)   | <0.001 |
|                              | 7.21           | 12.93          | 2.01           |        | 1.27           | 1.74          | 1.09           |        | 36.74          | 25.56          | -1.32          |              | 0.62           | 0.44          | -1.30          |        |
| United States Virgin Islands | (1.40, 22.19)  | (3.53, 33.84)  | (1.91, 2.11)   | <0.001 | (0.00, 12.64)  | (0.00, 16.45) | (1.03, 1.14)   | <0.001 | (20.29, 61.56) | (10.98, 51.15) | (-1.61, -1.03) | <0.001       | (0.00, 11.45)  | (0.00, 14.04) | (-1.66, -0.94) | <0.001 |
| Uruguay                      | 4.65           | 8.60           | 2.13           | <0.001 | 1.21           | 1.52          | 0.79           | <0.001 | 12.97          | 16.02          | 0.77           | <0.001       | 0.22           | 0.28          | 0.76           | 0.001  |

|                                    |               |               |              |        |              |              |               |        |                |                |                |              |              |              |                |        |
|------------------------------------|---------------|---------------|--------------|--------|--------------|--------------|---------------|--------|----------------|----------------|----------------|--------------|--------------|--------------|----------------|--------|
|                                    | (3.48, 6.09)  | (7.03, 10.42) | (2.08, 2.19) |        | (0.66, 2.04) | (0.91, 2.40) | (0.73, 0.84)  |        | (10.95, 15.26) | (13.86, 18.42) | (0.48, 1.06)   | (0.04, 0.72) | (0.07, 0.77) | (0.33, 1.19) |                |        |
|                                    | 2.81          | 3.68          | 0.95         |        | 0.26         | 0.34         | 1.02          |        | 3.42           | 7.95           | 2.99           | 0.06         | 0.13         | 2.72         |                |        |
| Uzbekistan                         | (2.46, 3.20)  | (3.37, 4.01)  | (0.88, 1.03) | <0.001 | (0.16, 0.40) | (0.25, 0.45) | (0.90, 1.14)  | <0.001 | (3.03, 3.84)   | (7.50, 8.43)   | (2.54, 3.45)   | <0.001       | (0.02, 0.14) | (0.08, 0.21) | (1.65, 3.81)   | <0.001 |
|                                    | 5.54          | 6.96          | 0.80         |        | 0.65         | 0.76         | 0.53          |        | 22.25          | 44.19          | 2.34           |              | 0.38         | 0.75         | 2.31           |        |
| Vanuatu                            | (1.19, 16.70) | (3.00, 13.99) | (0.73, 0.88) | <0.001 | (0.00, 9.02) | (0.01, 5.09) | (0.40, 0.67)  | <0.001 | (11.53, 39.27) | (32.79, 58.46) | (2.13, 2.55)   | <0.001       | (0.00, 8.57) | (0.01, 5.10) | (1.83, 2.80)   | <0.001 |
| Venezuela (Bolivarian Republic of) | (4.15, 5.12)  | (5.64, 6.59)  | (0.93, 1.02) | <0.001 | (0.34, 0.66) | (0.49, 0.80) | (0.88, 1.06)  | <0.001 | (8.65, 10.02)  | (7.36, 8.44)   | (-1.29, 0.17)  | 0.131        | (0.08, 0.27) | (0.07, 0.22) | (-1.77, 0.68)  | 0.376  |
|                                    | 5.19          | 6.97          | 1.02         |        | 1.43         | 1.70         | 0.59          |        | 24.63          | 25.85          | 0.17           |              | 0.42         | 0.44         | 0.17           |        |
| Viet Nam                           | (4.92, 5.47)  | (6.71, 7.23)  | (1.00, 1.04) | <0.001 | (1.29, 1.58) | (1.57, 1.83) | (0.54, 0.65)  | <0.001 | (24.03, 25.23) | (25.36, 26.35) | (0.07, 0.27)   | 0.001        | (0.34, 0.51) | (0.38, 0.51) | (0.04, 0.31)   | 0.013  |
|                                    | 4.45          | 5.80          | 0.94         |        | 0.48         | 0.60         | 0.78          |        | 5.40           | 6.30           | 0.61           |              | 0.09         | 0.11         | 0.74           |        |
| Yemen                              | (3.85, 5.13)  | (5.39, 6.23)  | (0.91, 0.97) | <0.001 | (0.29, 0.74) | (0.48, 0.76) | (0.60, 0.96)  | <0.001 | (4.71, 6.16)   | (5.87, 6.76)   | (0.25, 0.98)   | 0.001        | (0.02, 0.25) | (0.06, 0.18) | (0.18, 1.30)   | 0.010  |
|                                    | 3.53          | 4.20          | 0.61         |        | 0.71         | 0.84         | 0.59          |        | 23.29          | 22.11          | -0.20          |              | 0.39         | 0.37         | -0.21          |        |
| Zambia                             | (2.85, 4.34)  | (3.74, 4.71)  | (0.56, 0.67) | <0.001 | (0.43, 1.13) | (0.64, 1.08) | (0.50, 0.67)  | <0.001 | (21.46, 25.25) | (21.02, 23.25) | (-0.39, 0.00)  | 0.054        | (0.18, 0.75) | (0.24, 0.55) | (-0.41, 0.00)  | 0.052  |
|                                    | 4.16          | 4.60          | 0.36         |        | 0.52         | 0.52         | 0.05          |        | 8.73           | 13.36          | 1.44           |              | 0.14         | 0.22         | 1.45           |        |
| Zimbabwe                           | (3.52, 4.88)  | (4.08, 5.18)  | (0.29, 0.43) | <0.001 | (0.32, 0.82) | (0.36, 0.74) | (-0.14, 0.23) | 0.620  | (7.80, 9.75)   | (12.46, 14.32) | (0.91, 1.97)   | <0.001       | (0.05, 0.35) | (0.12, 0.38) | (0.30, 2.62)   | 0.013  |
| <b>Women</b>                       |               |               |              |        |              |              |               |        |                |                |                |              |              |              |                |        |
|                                    | 3.69          | 4.74          | 0.90         |        | 0.30         | 0.40         | 1.04          |        | 7.77           | 7.11           | -0.32          |              | 0.13         | 0.12         | -0.19          |        |
| Afghanistan                        | (2.84, 4.75)  | (4.22, 5.32)  | (0.80, 1.00) | <0.001 | (0.10, 0.76) | (0.26, 0.59) | (0.86, 1.21)  | <0.001 | (6.49, 9.27)   | (6.46, 7.82)   | (-0.50, -0.13) | 0.001        | (0.02, 0.53) | (0.05, 0.26) | (-0.46, 0.08)  | 0.166  |
|                                    | 3.65          | 4.78          | 0.94         |        | 0.48         | 0.55         | 0.47          |        | 8.72           | 7.88           | -0.39          |              | 0.14         | 0.13         | -0.33          |        |
| Albania                            | (2.35, 5.46)  | (3.01, 7.26)  | (0.90, 0.99) | <0.001 | (0.11, 1.43) | (0.10, 1.80) | (0.38, 0.56)  | <0.001 | (6.65, 11.27)  | (5.55, 10.89)  | (-1.21, 0.43)  | 0.350        | (0.00, 0.92) | (0.00, 1.11) | (-1.76, 1.12)  | 0.655  |
|                                    | 3.98          | 4.90          | 0.72         |        | 0.52         | 0.61         | 0.51          |        | 9.51           | 5.80           | -1.66          |              | 0.16         | 0.10         | -1.53          |        |
| Algeria                            | (3.42, 4.61)  | (4.44, 5.39)  | (0.68, 0.75) | <0.001 | (0.33, 0.79) | (0.46, 0.81) | (0.44, 0.58)  | <0.001 | (8.63, 10.46)  | (5.31, 6.34)   | (-1.84, -1.48) | <0.001       | (0.06, 0.34) | (0.04, 0.19) | (-1.73, -1.32) | <0.001 |

|                     |        |        |        |        |        |        |         |        |         |         |         |        |        |        |         |        |
|---------------------|--------|--------|--------|--------|--------|--------|---------|--------|---------|---------|---------|--------|--------|--------|---------|--------|
|                     | 7.90   | 16.27  | 2.55   |        | 1.75   | 2.41   | 1.10    |        | 29.14   | 73.36   | 3.26    |        | 0.50   | 1.26   | 3.25    |        |
| American Samoa      | (0.07, | (1.25, | (2.50, | <0.001 | (0.00, | (0.00, | (1.06,  | <0.001 | (5.33,  | (29.09, | (2.82,  | <0.001 | (0.00, | (0.00, | (2.77,  | <0.001 |
|                     | 61.29) | 73.18) | 2.61)  |        | 50.85) | 50.02) | 1.15)   |        | 94.77)  | 155.50) | 3.70)   |        | 48.67) | 48.04) | 3.74)   |        |
|                     | 5.29   | 6.31   | 0.62   |        | 0.96   | 0.91   | -0.20   |        | 3.23    | 3.80    | 0.59    |        | 0.05   | 0.06   | 0.76    |        |
| Andorra             | (0.02, | (0.07, | (0.58, | <0.001 | (0.00, | (0.00, | (-0.26, | <0.001 | (0.00,  | (0.00,  | (0.41,  | <0.001 | (0.00, | (0.00, | (-0.44, | 0.213  |
|                     | 51.48) | 50.00) | 0.66)  |        | 44.40) | 41.17) | -0.15)  |        | 48.09)  | 45.84)  | 0.78)   |        | 42.86) | 39.70) | 1.98)   |        |
|                     | 2.61   | 3.30   | 0.89   |        | 0.70   | 0.84   | 0.65    |        | 14.76   | 11.95   | -0.68   |        | 0.25   | 0.20   | -0.63   |        |
| Angola              | (1.93, | (2.84, | (0.78, | <0.001 | (0.37, | (0.62, | (0.57,  | <0.001 | (13.05, | (11.05, | (-1.26, | 0.022  | (0.07, | (0.10, | (-1.11, | 0.011  |
|                     | 3.46)  | 3.82)  | 1.00)  |        | 1.21)  | 1.13)  | 0.73)   |        | 16.64)  | 12.90)  | -0.10)  |        | 0.63)  | 0.37)  | -0.14)  |        |
|                     | 5.49   | 9.08   | 1.75   |        | 0.93   | 1.22   | 0.95    |        | 14.16   | 10.42   | -1.15   |        | 0.24   | 0.17   | -1.18   |        |
| Antigua and Barbuda | (0.04, | (0.76, | (1.73, | <0.001 | (0.00, | (0.00, | (0.91,  | <0.001 | (1.53,  | (1.10,  | (-1.41, | <0.001 | (0.00, | (0.00, | (-1.68, | <0.001 |
|                     | 41.26) | 39.54) | 1.77)  |        | 33.04) | 26.38) | 0.99)   |        | 55.44)  | 41.66)  | -0.88)  |        | 31.73) | 24.43) | -0.68)  |        |
|                     | 3.68   | 6.74   | 2.11   |        | 0.81   | 1.11   | 1.10    |        | 11.91   | 12.27   | 0.12    |        | 0.20   | 0.21   | 0.13    |        |
| Argentina           | (3.22, | (6.21, | (2.08, | <0.001 | (0.60, | (0.90, | (1.04,  | <0.001 | (11.06, | (11.55, | (-0.14, | 0.379  | (0.10, | (0.12, | (-0.31, | 0.565  |
|                     | 4.20)  | 7.31)  | 2.14)  |        | 1.07)  | 1.36)  | 1.16)   |        | 12.81)  | 13.02)  | 0.38)   |        | 0.35)  | 0.33)  | 0.57)   |        |
|                     | 2.80   | 3.52   | 0.81   |        | 0.29   | 0.35   | 0.68    |        | 2.10    | 1.86    | -0.36   |        | 0.03   | 0.03   | -0.32   |        |
| Armenia             | (1.72, | (2.13, | (0.72, | <0.001 | (0.04, | (0.04, | (0.51,  | <0.001 | (1.18,  | (0.91,  | (-1.00, | 0.286  | (0.00, | (0.00, | (-0.65, | 0.061  |
|                     | 4.34)  | 5.65)  | 0.89)  |        | 1.08)  | 1.56)  | 0.85)   |        | 3.48)   | 3.57)   | 0.30)   |        | 0.65)  | 1.09)  | 0.02)   |        |
|                     | 5.09   | 6.09   | 0.62   |        | 1.52   | 1.24   | -0.71   |        | 4.42    | 6.00    | 1.19    |        | 0.07   | 0.10   | 1.16    |        |
| Australia           | (4.36, | (5.37, | (0.57, | <0.001 | (1.13, | (0.92, | (-0.75, | <0.001 | (3.74,  | (5.29,  | (0.64,  | <0.001 | (0.01, | (0.03, | (0.53,  | <0.001 |
|                     | 5.91)  | 6.89)  | 0.68)  |        | 2.00)  | 1.63)  | -0.68)  |        | 5.18)   | 6.78)   | 1.73)   |        | 0.24)  | 0.27)  | 1.79)   |        |
|                     | 4.55   | 5.18   | 0.44   |        | 0.82   | 0.74   | -0.40   |        | 3.35    | 2.23    | -1.43   |        | 0.06   | 0.04   | -1.37   |        |
| Austria             | (3.53, | (4.05, | (0.29, | <0.001 | (0.42, | (0.35, | (-0.57, | <0.001 | (2.48,  | (1.51,  | (-1.92, | <0.001 | (0.00, | (0.00, | (-1.37, | <0.001 |
|                     | 5.80)  | 6.57)  | 0.59)  |        | 1.46)  | 1.41)  | -0.23)  |        | 4.44)   | 3.21)   | -0.94)  |        | 0.41)  | 0.43)  | -1.37)  |        |
|                     | 2.56   | 3.18   | 0.76   |        | 0.24   | 0.29   | 0.60    |        | 3.91    | 4.50    | 0.44    |        | 0.06   | 0.07   | 0.32    |        |
| Azerbaijan          | (1.83, | (2.46, | (0.71, | <0.001 | (0.06, | (0.10, | (0.50,  | <0.001 | (3.01,  | (3.64,  | (0.04,  | 0.033  | (0.00, | (0.01, | (-1.03, | 0.644  |
|                     | 3.51)  | 4.07)  | 0.81)  |        | 0.67)  | 0.67)  | 0.70)   |        | 5.02)   | 5.53)   | 0.85)   |        | 0.40)  | 0.37)  | 1.69)   |        |
|                     | 6.77   | 11.29  | 1.76   |        | 1.04   | 1.42   | 1.07    |        | 40.56   | 38.11   | -0.40   |        | 0.68   | 0.64   | -0.44   |        |
| Bahamas             | (1.82, | (5.09, | (1.70, | <0.001 | (0.00, | (0.05, | (0.99,  | <0.001 | (25.87, | (25.63, | (-0.68, | 0.007  | (0.00, | (0.00, | (-0.73, | 0.003  |
|                     | 18.16) | 21.87) | 1.82)  |        | 9.36)  | 7.80)  | 1.16)   |        | 61.05)  | 54.75)  | -0.11)  |        | 8.79)  | 6.44)  | -0.14)  |        |
|                     | 4.59   | 5.75   | 0.79   |        | 0.62   | 0.73   | 0.50    |        | 5.80    | 2.71    | -2.63   |        | 0.09   | 0.04   | -2.87   |        |
| Bahrain             | (1.36, | (3.11, | (0.73, | <0.001 | (0.00, | (0.07, | (0.42,  | <0.001 | (2.04,  | (1.00,  | (-3.28, | <0.001 | (0.00, | (0.00, | (-3.66, | <0.001 |
|                     | 11.74) | 9.94)  | 0.84)  |        | 5.74)  | 3.21)  | 0.58)   |        | 13.39)  | 6.09)   | -1.97)  |        | 4.82)  | 2.10)  | -2.08)  |        |

|                |        |        |        |        |        |        |           |        |         |         |         |        |        |        |         |        |
|----------------|--------|--------|--------|--------|--------|--------|-----------|--------|---------|---------|---------|--------|--------|--------|---------|--------|
|                | 2.66   | 3.56   | 1.00   |        | 0.38   | 0.49   | 0.86      |        | 16.11   | 10.21   | -1.51   |        | 0.27   | 0.17   | -1.46   |        |
| Bangladesh     | (2.44, | (3.36, | (0.92, | <0.001 | (0.30, | (0.42, | (0.76,    | <0.001 | (15.55, | (9.88,  | (-1.72, | <0.001 | (0.20, | (0.13, | (-1.75, | <0.001 |
|                | 2.91)  | 3.76)  | 1.07)  |        | 0.48)  | 0.57)  | 0.96)     |        | 16.68)  | 10.55)  | -1.29)  |        | 0.35)  | 0.22)  | -1.18)  |        |
|                | 6.37   | 10.77  | 1.82   |        | 1.37   | 1.74   | 0.84      |        | 25.84   | 23.25   | -0.41   |        | 0.43   | 0.39   | -0.40   |        |
| Barbados       | (1.55, | (3.73, | (1.75, | <0.001 | (0.01, | (0.03, | (0.75,    | <0.001 | (14.23, | (11.92, | (-0.83, | 0.055  | (0.00, | (0.00, | (-0.81, | 0.065  |
|                | 17.59) | 24.80) | 1.89)  |        | 9.77)  | 11.39) | 0.93)     |        | 43.38)  | 41.27)  | 0.01)   |        | 8.08)  | 9.00)  | 0.02)   |        |
|                | 4.64   | 6.46   | 1.16   |        | 0.53   | 0.68   | 0.88      |        | 5.54    | 9.53    | 1.81    |        | 0.09   | 0.16   | 2.02    |        |
| Belarus        | (3.75, | (5.23, | (1.02, | <0.001 | (0.26, | (0.33, | (0.78,    | <0.001 | (4.55,  | (8.04,  | (1.29,  | <0.001 | (0.01, | (0.03, | (1.07,  | <0.001 |
|                | 5.70)  | 7.93)  | 1.29)  |        | 0.98)  | 1.33)  | 0.99)     |        | 6.70)   | 11.26)  | 2.34)   |        | 0.37)  | 0.61)  | 2.98)   |        |
|                | 5.61   | 8.02   | 1.20   |        | 1.31   | 1.36   | 0.11197   |        | 3.13    | 4.25    | 1.06    |        | 0.05   | 0.07   | 1.13    |        |
| Belgium        | (4.58, | (6.75, | (1.13, | <0.001 | (0.84, | (0.87, | (0.11160, | <0.001 | (2.38,  | (3.34,  | (0.52,  | <0.001 | (0.00, | (0.00, | (0.01,  | 0.047  |
|                | 6.82)  | 9.47)  | 1.26)  |        | 1.97)  | 2.06)  | 0.11233)  |        | 4.07)   | 5.34)   | 1.60)   |        | 0.33)  | 0.38)  | 2.25)   |        |
|                | 4.62   | 8.15   | 1.99   |        | 0.56   | 0.86   | 1.50      |        | 6.08    | 9.05    | 1.32    |        | 0.10   | 0.15   | 1.07    |        |
| Belize         | (0.34, | (3.33, | (1.95, | <0.001 | (0.00, | (0.01, | (1.43,    | <0.001 | (0.74,  | (3.91,  | (0.50,  | 0.002  | (0.00, | (0.00, | (0.37,  | 0.003  |
|                | 22.56) | 16.85) | 2.04)  |        | 16.14) | 6.18)  | 1.57)     |        | 24.76)  | 18.03)  | 2.15)   |        | 15.39) | 4.90)  | 1.77)   |        |
|                | 2.95   | 3.52   | 0.68   |        | 0.72   | 0.82   | 0.46      |        | 13.87   | 9.57    | -1.22   |        | 0.24   | 0.16   | -1.40   |        |
| Benin          | (1.93, | (2.81, | (0.56, | <0.001 | (0.28, | (0.49, | (0.42,    | <0.001 | (11.50, | (8.36,  | (-1.51, | <0.001 | (0.03, | (0.04, | (-2.02, | <0.001 |
|                | 4.35)  | 4.37)  | 0.79)  |        | 1.59)  | 1.29)  | 0.50)     |        | 16.62)  | 10.93)  | -0.94)  |        | 0.92)  | 0.45)  | -0.78)  |        |
|                | 5.30   | 8.65   | 1.71   |        | 0.85   | 1.12   | 0.97      |        | 6.42    | 3.43    | -2.14   |        | 0.11   | 0.06   | -1.86   |        |
| Bermuda        | (0.03, | (0.10, | (1.66, | <0.001 | (0.00, | (0.00, | (0.92,    | <0.001 | (0.08,  | (0.00,  | (-2.77, | <0.001 | (0.00, | (0.00, | (-2.92, | 0.001  |
|                | 49.46) | 66.92) | 1.77)  |        | 42.45) | 54.55) | 1.02)     |        | 51.19)  | 58.45)  | -1.51)  |        | 41.24) | 52.71) | -0.78)  |        |
|                | 2.57   | 3.69   | 1.30   |        | 0.29   | 0.40   | 1.09      |        | 7.05    | 7.09    | 0.03    |        | 0.12   | 0.12   | -0.01   |        |
| Bhutan         | (0.49, | (1.36, | (1.20, | <0.001 | (0.00, | (0.00, | (0.95,    | <0.001 | (2.94,  | (3.63,  | (-0.27, | 0.843  | (0.00, | (0.00, | (-0.33, | 0.947  |
|                | 8.44)  | 8.05)  | 1.41)  |        | 4.91)  | 3.12)  | 1.23)     |        | 14.68)  | 12.52)  | 0.33)   |        | 4.64)  | 2.60)  | 0.31)   |        |
| Bolivia        | 3.00   | 5.63   | 2.21   |        | 0.33   | 0.58   | 2.02      |        | 15.41   | 12.76   | -0.65   |        | 0.26   | 0.22   | -0.56   |        |
| (Plurinational | (2.10, | (4.71, | (2.14, | <0.001 | (0.09, | (0.31, | (1.86,    | <0.001 | (13.27, | (11.36, | (-0.84, | <0.001 | (0.05, | (0.07, | (-0.74, | <0.001 |
| State of)      | 4.18)  | 6.67)  | 2.27)  |        | 0.87)  | 0.97)  | 2.18)     |        | 17.82)  | 14.29)  | -0.46)  |        | 0.78)  | 0.51)  | -0.38)  |        |
|                | 4.26   | 5.07   | 0.62   |        | 0.43   | 0.48   | 0.41      |        | 2.03    | 2.40    | 0.52    |        | 0.03   | 0.04   | 0.19    |        |
| Bosnia and     | (3.04, | (3.33, | (0.54, | <0.001 | (0.12, | (0.08, | (0.26,    | <0.001 | (1.22,  | (1.26,  | (-0.17, | 0.142  | (0.00, | (0.00, | (-0.05, | 0.120  |
| Herzegovina    | 5.82)  | 7.48)  | 0.71)  |        | 1.12)  | 1.66)  | 0.57)     |        | 3.18)   | 4.23)   | 1.22)   |        | 0.49)  | 0.95)  | 0.43)   |        |
|                | 4.57   | 5.58   | 0.68   |        | 1.27   | 1.35   | 0.21      |        | 26.84   | 25.72   | -0.13   |        | 0.45   | 0.43   | -0.17   |        |
| Botswana       | (2.34, | (3.76, | (0.63, | <0.001 | (0.30, | (0.55, | (0.12,    | <0.001 | (20.79, | (21.60, | (-0.56, | 0.542  | (0.01, | (0.06, | (-0.87, | 0.633  |
|                | 8.24)  | 8.01)  | 0.74)  |        | 3.80)  | 2.80)  | 0.31)     |        | 34.25)  | 30.41)  | 0.30)   |        | 2.65)  | 1.48)  | 0.53)   |        |



|                          |        |        |         |        |        |        |         |        |         |         |         |        |        |        |         |        |
|--------------------------|--------|--------|---------|--------|--------|--------|---------|--------|---------|---------|---------|--------|--------|--------|---------|--------|
|                          | 4.39   | 6.38   | 1.29    |        | 0.77   | 1.01   | 0.91    |        | 20.31   | 18.13   | -0.40   |        | 0.34   | 0.30   | -0.41   |        |
| Brazil                   | (4.16, | (6.15, | (1.22,  | <0.001 | (0.67, | (0.91, | (0.76,  | <0.001 | (19.81, | (17.73, | (-0.63, | 0.001  | (0.27, | (0.25, | (-0.64, | 0.001  |
|                          | 4.63)  | 6.62)  | 1.35)   |        | 0.87)  | 1.11)  | 1.05)   |        | 20.82)  | 18.53)  | -0.16)  |        | 0.41)  | 0.36)  | -0.18)  |        |
|                          | 4.81   | 5.26   | 0.31    |        | 0.58   | 0.60   | 0.10    |        | 6.24    | 3.84    | -1.70   |        | 0.10   | 0.06   | -1.82   |        |
| Brunei Darussalam        | (0.89, | (1.70, | (0.25,  | <0.001 | (0.00, | (0.00, | (0.03,  | 0.004  | (1.52,  | (0.96,  | (-1.82, | <0.001 | (0.00, | (0.00, | (-2.19, | <0.001 |
|                          | 15.28) | 12.79) | 0.37)   |        | 8.46)  | 5.82)  | 0.17)   |        | 17.38)  | 10.79)  | -1.58)  |        | 7.58)  | 4.88)  | -1.45)  |        |
|                          | 4.18   | 5.79   | 1.12    |        | 0.50   | 0.60   | 0.64    |        | 9.42    | 14.77   | 1.57    |        | 0.16   | 0.24   | 1.50    |        |
| Bulgaria                 | (3.20, | (4.37, | (1.07,  | <0.001 | (0.21, | (0.21, | (0.56,  | <0.001 | (7.92,  | (12.40, | (1.04,  | <0.001 | (0.02, | (0.04, | (0.73,  | <0.001 |
|                          | 5.36)  | 7.58)  | 1.18)   |        | 1.02)  | 1.41)  | 0.72)   |        | 11.13)  | 17.51)  | 2.10)   |        | 0.53)  | 0.91)  | 2.28)   |        |
|                          | 2.84   | 3.30   | 0.61    |        | 0.61   | 0.67   | 0.33    |        | 13.50   | 10.70   | -0.75   |        | 0.23   | 0.18   | -0.82   |        |
| Burkina Faso             | (2.09, | (2.78, | (0.47,  | <0.001 | (0.29, | (0.45, | (0.22,  | <0.001 | (11.74, | (9.72,  | (-1.00, | <0.001 | (0.06, | (0.08, | (-1.37, | 0.003  |
|                          | 3.79)  | 3.89)  | 0.74)   |        | 1.15)  | 0.97)  | 0.44)   |        | 15.46)  | 11.74)  | -0.49)  |        | 0.65)  | 0.37)  | -0.28)  |        |
|                          | 3.73   | 3.23   | -0.47   |        | 0.78   | 0.82   | 0.16    |        | 32.42   | 16.40   | -2.35   |        | 0.54   | 0.27   | -2.48   |        |
| Burundi                  | (2.64, | (2.54, | (-0.63, | <0.001 | (0.34, | (0.49, | (0.03,  | 0.012  | (29.01, | (14.77, | (-2.68, | <0.001 | (0.19, | (0.10, | (-2.75, | <0.001 |
|                          | 5.15)  | 4.08)  | -0.32)  |        | 1.58)  | 1.30)  | 0.28)   |        | 36.15)  | 18.18)  | -2.02)  |        | 1.28)  | 0.61)  | -2.20)  |        |
|                          | 2.96   | 3.99   | 1.07    |        | 0.71   | 0.84   | 0.60    |        | 6.19    | 5.72    | -0.31   |        | 0.10   | 0.10   | -0.13   |        |
| Cabo Verde               | (0.33, | (1.25, | (0.99,  | <0.001 | (0.00, | (0.02, | (0.45,  | <0.001 | (1.60,  | (2.27,  | (-0.81, | 0.238  | (0.00, | (0.00, | (-0.94, | 0.764  |
|                          | 12.84) | 9.64)  | 1.16)   |        | 9.42)  | 4.86)  | 0.74)   |        | 17.61)  | 12.00)  | 0.20)   |        | 8.47)  | 3.52)  | 0.70)   |        |
|                          | 3.64   | 4.85   | 1.02    |        | 0.53   | 0.66   | 0.76    |        | 17.17   | 18.20   | 0.21    |        | 0.29   | 0.31   | 0.23    |        |
| Cambodia                 | (2.85, | (4.15, | (0.92,  | <0.001 | (0.26, | (0.42, | (0.65,  | <0.001 | (15.38, | (16.83, | (0.13,  | <0.001 | (0.10, | (0.15, | (0.14,  | <0.001 |
|                          | 4.59)  | 5.64)  | 1.13)   |        | 0.98)  | 0.99)  | 0.88)   |        | 19.12)  | 19.67)  | 0.28)   |        | 0.67)  | 0.56)  | 0.32)   |        |
|                          | 3.06   | 3.62   | 0.61    |        | 0.60   | 0.73   | 0.71    |        | 18.26   | 12.47   | -1.35   |        | 0.31   | 0.21   | -1.41   |        |
| Cameroon                 | (2.32, | (3.15, | (0.44,  | <0.001 | (0.30, | (0.53, | (0.51,  | <0.001 | (16.32, | (11.57, | (-1.57, | <0.001 | (0.11, | (0.11, | (-1.86, | <0.001 |
|                          | 3.98)  | 4.14)  | 0.79)   |        | 1.10)  | 0.99)  | 0.91)   |        | 20.38)  | 13.42)  | -1.14)  |        | 0.73)  | 0.38)  | -0.96)  |        |
|                          | 5.38   | 5.74   | 0.22    |        | 6.77   | 4.33   | -1.51   |        | 3.45    | 6.70    | 2.40    |        | 0.05   | 0.11   | 2.73    |        |
| Canada                   | (4.79, | (5.14, | (0.17,  | <0.001 | (6.12, | (3.81, | (-1.60, | <0.001 | (2.99,  | (6.06,  | (1.91,  | <0.001 | (0.01, | (0.04, | (1.48,  | <0.001 |
|                          | 6.03)  | 6.39)  | 0.28)   |        | 7.48)  | 4.89)  | -1.42)  |        | 3.97)   | 7.40)   | 2.90)   |        | 0.16)  | 0.24)  | 4.00)   |        |
|                          | 2.56   | 2.85   | 0.43    |        | 0.58   | 0.58   | 0.02    |        | 15.72   | 13.81   | -0.52   |        | 0.27   | 0.23   | -0.53   |        |
| Central African Republic | (1.37, | (1.92, | (0.23,  | <0.001 | (0.12, | (0.21, | (-0.10, | 0.771  | (12.40, | (11.62, | (-0.72, | <0.001 | (0.01, | (0.03, | (-1.25, | 0.151  |
|                          | 4.48)  | 4.10)  | 0.64)   |        | 1.86)  | 1.29)  | 0.13)   |        | 19.72)  | 16.31)  | -0.33)  |        | 1.42)  | 0.82)  | 0.19)   |        |
|                          | 2.80   | 3.18   | 0.51    |        | 0.51   | 0.56   | 0.33    |        | 14.21   | 8.48    | -1.72   |        | 0.24   | 0.14   | -1.88   |        |
| Chad                     | (1.89, | (2.55, | (0.39,  | <0.001 | (0.18, | (0.32, | (0.22,  | <0.001 | (11.98, | (7.40,  | (-2.00, | <0.001 | (0.04, | (0.04, | (-2.19, | <0.001 |
|                          | 4.02)  | 3.92)  | 0.64)   |        | 1.20)  | 0.94)  | 0.45)   |        | 16.75)  | 9.67)   | -1.43)  |        | 0.82)  | 0.40)  | -1.55)  |        |

|               |         |         |         |        |         |         |         |        |         |         |         |        |         |         |         |        |
|---------------|---------|---------|---------|--------|---------|---------|---------|--------|---------|---------|---------|--------|---------|---------|---------|--------|
|               | 4.00    | 7.53    | 2.23    |        | 0.96    | 1.32    | 1.10    |        | 4.90    | 6.45    | 0.98    |        | 0.08    | 0.11    | 1.13    |        |
| Chile         | (3.31,  | (6.64,  | (2.15,  | <0.001 | (0.64,  | (0.96,  | (0.96,  | <0.001 | (4.12,  | (5.63,  | (0.44,  | <0.001 | (0.01,  | (0.03,  | (0.41,  | 0.002  |
|               | 4.81)   | 8.51)   | 2.30)   |        | 1.39)   | 1.77)   | 1.24)   |        | 5.79)   | 7.37)   | 1.52)   |        | 0.28)   | 0.30)   | 1.85)   |        |
|               | 7.54    | 4.95    | -1.41   |        | 0.83    | 0.74    | -0.38   |        | 5.40    | 2.01    | -3.62   |        | 0.09    | 0.03    | -3.77   |        |
| China         | (7.43,  | (4.86,  | (-1.74, | <0.001 | (0.80,  | (0.70,  | (-0.46, | <0.001 | (5.31,  | (1.95,  | (-4.55, | <0.001 | (0.08,  | (0.03,  | (-4.82, | <0.001 |
|               | 7.65)   | 5.04)   | -1.07)  |        | 0.87)   | 0.77)   | -0.30)  |        | 5.49)   | 2.07)   | -2.68)  |        | 0.10)   | 0.04)   | -2.70)  |        |
|               | 4.01    | 6.20    | 1.52    |        | 0.98    | 1.21    | 0.72    |        | 10.71   | 14.35   | 1.03    |        | 0.18    | 0.24    | 1.08    |        |
| Colombia      | (3.55,  | (5.72,  | (1.46,  | <0.001 | (0.76,  | (1.00,  | (0.65,  | <0.001 | (9.96,  | (13.60, | (0.44,  | 0.001  | (0.09,  | (0.15,  | (0.47,  | 0.001  |
|               | 4.51)   | 6.72)   | 1.59)   |        | 1.24)   | 1.45)   | 0.80)   |        | 11.51)  | 15.13)  | 1.63)   |        | 0.31)   | 0.36)   | 1.69)   |        |
|               | 3.95    | 4.13    | 0.14    |        | 1.15    | 1.25    | 0.29    |        | 28.92   | 20.56   | -1.16   |        | 0.48    | 0.34    | -1.17   |        |
| Comoros       | (0.88,  | (1.51,  | (0.02,  | 0.019  | (0.02,  | (0.13,  | (0.20,  | <0.001 | (18.38, | (13.82, | (-4.08, | 0.444  | (0.00,  | (0.00,  | (-3.80, | 0.391  |
|               | 12.07)  | 9.20)   | 0.26)   |        | 7.86)   | 5.03)   | 0.38)   |        | 43.87)  | 29.56)  | 1.85)   |        | 6.81)   | 3.55)   | 1.53)   |        |
|               | 3.33    | 3.52    | 0.19    |        | 0.89    | 0.94    | 0.19    |        | 18.85   | 15.23   | -0.77   |        | 0.32    | 0.26    | -0.75   |        |
| Congo         | (1.87,  | (2.49,  | (0.10,  | <0.001 | (0.25,  | (0.46,  | (0.07,  | 0.001  | (14.97, | (12.98, | (-1.68, | 0.097  | (0.02,  | (0.05,  | (-1.64, | 0.103  |
|               | 5.61)   | 4.83)   | 0.28)   |        | 2.41)   | 1.73)   | 0.30)   |        | 23.50)  | 17.76)  | 0.14)   |        | 1.60)   | 0.79)   | 0.15)   |        |
|               | 10.94   | 12.76   | 0.51    |        | 1.76    | 1.97    | 0.38    |        | 46.36   | 31.85   | -1.28   |        | 0.79    | 0.54    | -1.29   |        |
| Cook Islands  | (0.00,  | (0.00,  | (0.45,  | <0.001 | (0.00,  | (0.00,  | (0.32,  | <0.001 | (3.80,  | (0.79,  | (-1.37, | <0.001 | (0.00,  | (0.00,  | (-1.41, | <0.001 |
|               | 140.82) | 148.67) | 0.58)   |        | 124.13) | 127.78) | 0.45)   |        | 200.55) | 182.48) | -1.20)  |        | 122.41) | 124.92) | -1.17)  |        |
|               | 4.69    | 7.59    | 1.68    |        | 0.96    | 1.26    | 0.95    |        | 9.81    | 14.61   | 1.31    |        | 0.16    | 0.25    | 1.41    |        |
| Costa Rica    | (3.15,  | (5.98,  | (1.62,  | <0.001 | (0.36,  | (0.66,  | (0.91,  | <0.001 | (7.51,  | (12.34, | (0.39,  | 0.005  | (0.00,  | (0.04,  | (0.33,  | 0.010  |
|               | 6.76)   | 9.52)   | 1.75)   |        | 2.13)   | 2.21)   | 1.00)   |        | 12.63)  | 17.20)  | 2.23)   |        | 0.98)   | 0.85)   | 2.49)   |        |
|               | 3.06    | 3.48    | 0.51    |        | 0.69    | 0.74    | 0.26    |        | 16.55   | 10.84   | -1.43   |        | 0.28    | 0.18    | -1.41   |        |
| Cote d'Ivoire | (2.37,  | (2.99,  | (0.41,  | <0.001 | (0.39,  | (0.53,  | (0.13,  | <0.001 | (14.86, | (9.96,  | (-1.72, | <0.001 | (0.10,  | (0.08,  | (-1.81, | <0.001 |
|               | 3.91)   | 4.03)   | 0.61)   |        | 1.17)   | 1.02)   | 0.40)   |        | 18.41)  | 11.78)  | -1.13)  |        | 0.65)   | 0.35)   | -1.00)  |        |
|               | 5.23    | 5.07    | -0.12   |        | 0.56    | 0.51    | -0.37   |        | 2.88    | 2.15    | -0.94   |        | 0.05    | 0.04    | -0.73   |        |
| Croatia       | (3.85,  | (3.48,  | (-0.18, | <0.001 | (0.18,  | (0.11,  | (-0.49, | <0.001 | (1.89,  | (1.18,  | (-1.81, | 0.037  | (0.00,  | (0.00,  | (-1.37, | 0.024  |
|               | 6.98)   | 7.22)   | -0.06)  |        | 1.34)   | 1.56)   | -0.24)  |        | 4.24)   | 3.69)   | -0.06)  |        | 0.57)   | 0.84)   | -0.10)  |        |
|               | 5.29    | 8.92    | 1.83    |        | 0.82    | 1.12    | 1.08    |        | 9.62    | 8.38    | -0.49   |        | 0.16    | 0.14    | -0.43   |        |
| Cuba          | (4.39,  | (7.58,  | (1.80,  | <0.001 | (0.50,  | (0.68,  | (1.03,  | <0.001 | (8.39,  | (7.08,  | (-0.75, | <0.001 | (0.04,  | (0.02,  | (-0.78, | 0.017  |
|               | 6.32)   | 10.43)  | 1.87)   |        | 1.29)   | 1.75)   | 1.13)   |        | 10.98)  | 9.85)   | -0.22)  |        | 0.44)   | 0.47)   | -0.08)  |        |
|               | 4.39    | 6.09    | 1.13    |        | 0.80    | 0.86    | 0.22    |        | 4.08    | 2.21    | -2.15   |        | 0.07    | 0.04    | -2.33   |        |
| Cyprus        | (1.71,  | (3.39,  | (1.09,  | <0.001 | (0.03,  | (0.10,  | (0.10,  | <0.001 | (1.51,  | (0.74,  | (-3.23, | <0.001 | (0.00,  | (0.00,  | (-2.99, | <0.001 |
|               | 9.38)   | 10.57)  | 1.17)   |        | 4.17)   | 3.80)   | 0.35)   |        | 8.97)   | 5.66)   | -1.05)  |        | 2.89)   | 2.60)   | -1.66)  |        |

|                   |        |        |        |        |        |        |         |        |         |         |         |        |        |        |         |        |
|-------------------|--------|--------|--------|--------|--------|--------|---------|--------|---------|---------|---------|--------|--------|--------|---------|--------|
|                   | 5.31   | 6.06   | 0.45   |        | 0.81   | 0.78   | -0.12   |        | 5.88    | 6.09    | 0.15    |        | 0.10   | 0.10   | -0.02   |        |
| Czechia           | (4.31, | (4.87, | (0.39, | <0.001 | (0.45, | (0.40, | (-0.29, | 0.146  | (4.81,  | (4.90,  | (-0.60, | 0.700  | (0.01, | (0.01, | (-0.42, | 0.939  |
|                   | 6.49)  | 7.48)  | 0.51)  |        | 1.36)  | 1.43)  | 0.04)   |        | 7.12)   | 7.52)   | 0.90)   |        | 0.40)  | 0.51)  | 0.39)   |        |
| Democratic        | 3.99   | 4.13   | 0.12   |        | 0.50   | 0.51   | 0.04    |        | 7.18    | 5.33    | -1.04   |        | 0.12   | 0.09   | -1.11   |        |
| People's Republic | (3.41, | (3.57, | (0.06, | <0.001 | (0.31, | (0.33, | (-0.04, | 0.317  | (6.40,  | (4.69,  | (-1.12, | <0.001 | (0.04, | (0.02, | (-1.33, | <0.001 |
| of Korea          | 4.65)  | 4.75)  | 0.18)  |        | 0.78)  | 0.76)  | 0.11)   |        | 8.04)   | 6.02)   | -0.96)  |        | 0.29)  | 0.23)  | -0.88)  |        |
| Democratic        | 2.64   | 3.06   | 0.56   |        | 0.74   | 0.77   | 0.17    |        | 14.43   | 11.48   | -0.90   |        | 0.24   | 0.19   | -0.91   |        |
| Republic of the   | (2.27, | (2.79, | (0.45, | <0.001 | (0.55, | (0.64, | (0.11,  | <0.001 | (13.53, | (10.96, | (-1.17, | <0.001 | (0.14, | (0.13, | (-1.14, | <0.001 |
| Congo             | 3.06)  | 3.34)  | 0.68)  |        | 0.98)  | 0.92)  | 0.22)   |        | 15.37)  | 12.02)  | -0.62)  |        | 0.40)  | 0.28)  | -0.69)  |        |
|                   | 6.48   | 7.73   | 0.64   |        | 0.90   | 0.88   | -0.10   |        | 2.49    | 2.30    | -0.14   |        | 0.04   | 0.04   | 0.11    |        |
| Denmark           | (4.96, | (6.01, | (0.55, | <0.001 | (0.40, | (0.38, | (-0.26, | 0.248  | (1.59,  | (1.42,  | (-1.47, | 0.844  | (0.00, | (0.00, | (-1.70, | 0.906  |
|                   | 8.35)  | 9.81)  | 0.74)  |        | 1.77)  | 1.78)  | 0.07)   |        | 3.74)   | 3.56)   | 1.22)   |        | 0.53)  | 0.55)  | 1.96)   |        |
|                   | 3.34   | 3.82   | 0.47   |        | 1.16   | 1.32   | 0.45    |        | 21.38   | 15.71   | -0.89   |        | 0.36   | 0.26   | -0.92   |        |
| Djibouti          | (0.64, | (1.77, | (0.44, | <0.001 | (0.03, | (0.29, | (0.35,  | <0.001 | (12.56, | (11.14, | (-1.87, | 0.075  | (0.00, | (0.00, | (-1.94, | 0.079  |
|                   | 10.88) | 7.31)  | 0.50)  |        | 7.53)  | 3.91)  | 0.55)   |        | 34.49)  | 21.62)  | 0.09)   |        | 6.25)  | 2.24)  | 0.11)   |        |
|                   | 7.37   | 11.04  | 1.39   |        | 1.02   | 1.33   | 0.89    |        | 40.17   | 39.52   | -0.29   |        | 0.67   | 0.66   | -0.11   |        |
| Dominica          | (0.15, | (0.67, | (1.25, | <0.001 | (0.00, | (0.00, | (0.79,  | <0.001 | (13.58, | (12.76, | (-1.04, | 0.462  | (0.00, | (0.00, | (-0.94, | 0.805  |
|                   | 47.53) | 50.01) | 1.53)  |        | 36.67) | 32.68) | 0.99)   |        | 95.41)  | 92.85)  | 0.48)   |        | 36.05) | 31.34) | 0.73)   |        |
|                   | 4.36   | 8.89   | 2.50   |        | 0.67   | 1.09   | 1.68    |        | 16.49   | 22.47   | 1.04    |        | 0.27   | 0.38   | 1.08    |        |
| Dominican         | (3.36, | (7.69, | (2.44, | <0.001 | (0.33, | (0.70, | (1.57,  | <0.001 | (14.51, | (20.54, | (0.51,  | <0.001 | (0.08, | (0.17, | (0.52,  | <0.001 |
| Republic          | 5.57)  | 10.23) | 2.56)  |        | 1.27)  | 1.62)  | 1.79)   |        | 18.70)  | 24.54)  | 1.57)   |        | 0.74)  | 0.74)  | 1.65)   |        |
|                   | 3.16   | 5.66   | 2.04   |        | 0.38   | 0.67   | 1.99    |        | 10.75   | 9.95    | -0.61   |        | 0.18   | 0.17   | -0.63   |        |
| Ecuador           | (2.42, | (4.90, | (1.99, | <0.001 | (0.16, | (0.43, | (1.77,  | <0.001 | (9.36,  | (8.94,  | (-1.39, | 0.124  | (0.04, | (0.06, | (-1.62, | 0.218  |
|                   | 4.07)  | 6.50)  | 2.09)  |        | 0.78)  | 1.00)  | 2.21)   |        | 12.30)  | 11.04)  | 0.17)   |        | 0.51)  | 0.37)  | 0.37)   |        |
|                   | 3.93   | 5.40   | 1.13   |        | 0.78   | 1.00   | 0.85    |        | 12.74   | 9.87    | -0.72   |        | 0.21   | 0.16   | -0.93   |        |
| Egypt             | (3.56, | (5.08, | (1.05, | <0.001 | (0.62, | (0.87, | (0.75,  | <0.001 | (12.07, | (9.44,  | (-1.48, | 0.063  | (0.13, | (0.11, | (-1.30, | <0.001 |
|                   | 4.33)  | 5.73)  | 1.21)  |        | 0.97)  | 1.15)  | 0.94)   |        | 13.44)  | 10.32)  | 0.04)   |        | 0.32)  | 0.23)  | -0.57)  |        |
|                   | 3.50   | 5.14   | 1.34   |        | 0.49   | 0.73   | 1.38    |        | 9.29    | 5.90    | -1.64   |        | 0.15   | 0.10   | -1.52   |        |
| El Salvador       | (2.43, | (4.00, | (1.29, | <0.001 | (0.16, | (0.34, | (1.31,  | <0.001 | (7.53,  | (4.67,  | (-2.29, | <0.001 | (0.01, | (0.01, | (-2.12, | <0.001 |
|                   | 4.90)  | 6.53)  | 1.40)  |        | 1.18)  | 1.36)  | 1.46)   |        | 11.38)  | 7.36)   | -1.00)  |        | 0.71)  | 0.47)  | -0.93)  |        |
|                   | 2.61   | 3.56   | 1.10   |        | 0.76   | 1.03   | 1.07    |        | 15.42   | 11.35   | -1.07   |        | 0.26   | 0.19   | -1.10   |        |
| Equatorial Guinea | (0.33, | (1.68, | (1.00, | <0.001 | (0.00, | (0.20, | (0.92,  | <0.001 | (7.95,  | (7.65,  | (-1.61, | <0.001 | (0.00, | (0.00, | (-1.87, | 0.006  |
|                   | 9.76)  | 6.76)  | 1.20)  |        | 6.78)  | 3.32)  | 1.23)   |        | 27.27)  | 16.34)  | -0.53)  |        | 5.92)  | 2.04)  | -0.32)  |        |

|          |        |        |         |        |        |        |         |        |         |         |         |        |        |        |         |        |
|----------|--------|--------|---------|--------|--------|--------|---------|--------|---------|---------|---------|--------|--------|--------|---------|--------|
|          | 3.08   | 3.33   | 0.28    |        | 0.70   | 0.83   | 0.60    |        | 21.12   | 14.83   | -1.29   |        | 0.36   | 0.25   | -1.37   |        |
| Eritrea  | (1.79, | (2.42, | (0.18,  | <0.001 | (0.18, | (0.42, | (0.47,  | <0.001 | (17.37, | (12.81, | (-1.40, | <0.001 | (0.04, | (0.06, | (-1.56, | <0.001 |
|          | 5.01)  | 4.48)  | 0.38)   |        | 1.92)  | 1.51)  | 0.73)   |        | 25.48)  | 17.10)  | -1.17)  |        | 1.44)  | 0.74)  | -1.18)  |        |
|          | 4.91   | 6.31   | 0.87    |        | 0.76   | 0.87   | 0.46    |        | 8.22    | 6.75    | -0.44   |        | 0.13   | 0.11   | -0.27   |        |
| Estonia  | (2.68, | (3.28, | (0.74,  | <0.001 | (0.10, | (0.07, | (0.41,  | <0.001 | (5.18,  | (3.51,  | (-1.99, | 0.580  | (0.00, | (0.00, | (-2.24, | 0.790  |
|          | 8.34)  | 11.34) | 1.00)   |        | 2.80)  | 4.09)  | 0.51)   |        | 12.46)  | 12.04)  | 1.13)   |        | 1.76)  | 2.88)  | 1.74)   |        |
|          | 4.02   | 4.58   | 0.48    |        | 0.93   | 0.95   | 0.10    |        | 24.92   | 18.52   | -1.07   |        | 0.42   | 0.31   | -1.07   |        |
| Eswatini | (1.50, | (2.35, | (0.27,  | <0.001 | (0.07, | (0.16, | (0.02,  | 0.012  | (17.52, | (13.62, | (-1.46, | <0.001 | (0.00, | (0.00, | (-1.53, | <0.001 |
|          | 9.15)  | 8.17)  | 0.69)   |        | 4.73)  | 3.25)  | 0.18)   |        | 34.69)  | 24.70)  | -0.69)  |        | 4.00)  | 2.25)  | -0.61)  |        |
|          | 3.25   | 3.15   | -0.07   |        | 0.61   | 0.71   | 0.56    |        | 22.06   | 9.07    | -3.00   |        | 0.37   | 0.15   | -3.08   |        |
| Ethiopia | (2.89, | (2.92, | (-0.19, | 0.278  | (0.46, | (0.60, | (0.46,  | <0.001 | (21.10, | (8.67,  | (-3.22, | <0.001 | (0.26, | (0.10, | (-3.34, | <0.001 |
|          | 3.64)  | 3.40)  | 0.05)   |        | 0.79)  | 0.83)  | 0.66)   |        | 23.05)  | 9.49)   | -2.79)  |        | 0.52)  | 0.21)  | -2.83)  |        |
|          | 9.41   | 12.74  | 1.02    |        | 1.59   | 1.86   | 0.54    |        | 60.82   | 82.64   | 1.07    |        | 1.03   | 1.40   | 1.09    |        |
| Fiji     | (5.22, | (8.03, | (0.95,  | <0.001 | (0.26, | (0.42, | (0.47,  | <0.001 | (49.11, | (69.78, | (0.79,  | <0.001 | (0.08, | (0.23, | (0.80,  | <0.001 |
|          | 15.79) | 19.24) | 1.09)   |        | 5.39)  | 5.25)  | 0.61)   |        | 74.59)  | 97.21)  | 1.36)   |        | 4.52)  | 4.56)  | 1.38)   |        |
|          | 5.13   | 5.32   | 0.13    |        | 0.73   | 0.63   | -0.49   |        | 3.10    | 2.02    | -1.54   |        | 0.05   | 0.03   | -1.57   |        |
| Finland  | (3.75, | (3.87, | (0.04,  | 0.003  | (0.28, | (0.21, | (-0.65, | <0.001 | (2.07,  | (1.18,  | (-2.28, | <0.001 | (0.00, | (0.00, | (-2.86, | 0.020  |
|          | 6.88)  | 7.19)  | 0.21)   |        | 1.60)  | 1.52)  | -0.32)  |        | 4.52)   | 3.29)   | -0.79)  |        | 0.63)  | 0.62)  | -0.25)  |        |
|          | 5.32   | 6.20   | 0.53    |        | 1.48   | 1.07   | -1.14   |        | 3.02    | 3.89    | 0.85    |        | 0.05   | 0.06   | 0.63    |        |
| France   | (4.90, | (5.73, | (0.46,  | <0.001 | (1.26, | (0.87, | (-1.27, | <0.001 | (2.70,  | (3.52,  | (0.48,  | <0.001 | (0.02, | (0.03, | (-0.19, | 0.131  |
|          | 5.77)  | 6.71)  | 0.60)   |        | 1.73)  | 1.29)  | -1.02)  |        | 3.36)   | 4.29)   | 1.22)   |        | 0.11)  | 0.14)  | 1.46)   |        |
|          | 3.08   | 3.60   | 0.56    |        | 1.03   | 1.11   | 0.26    |        | 16.13   | 12.21   | -0.94   |        | 0.27   | 0.21   | -0.85   |        |
| Gabon    | (1.06, | (1.96, | (0.50,  | <0.001 | (0.11, | (0.32, | (0.19,  | <0.001 | (10.63, | (8.93,  | (-1.31, | <0.001 | (0.00, | (0.00, | (-1.27, | <0.001 |
|          | 7.33)  | 6.13)  | 0.61)   |        | 4.37)  | 2.84)  | 0.33)   |        | 23.69)  | 16.34)  | -0.56)  |        | 3.23)  | 1.49)  | -0.42)  |        |
|          | 3.10   | 3.80   | 0.77    |        | 0.88   | 0.98   | 0.38    |        | 12.57   | 10.93   | -0.52   |        | 0.21   | 0.18   | -0.43   |        |
| Gambia   | (1.11, | (2.24, | (0.65,  | <0.001 | (0.07, | (0.29, | (0.31,  | <0.001 | (7.88,  | (8.08,  | (-1.57, | 0.338  | (0.00, | (0.00, | (-0.80, | 0.027  |
|          | 7.33)  | 6.12)  | 0.88)   |        | 4.20)  | 2.50)  | 0.45)   |        | 19.32)  | 14.52)  | 0.55)   |        | 3.18)  | 1.33)  | -0.05)  |        |
|          | 2.95   | 3.62   | 0.71    |        | 0.36   | 0.40   | 0.38    |        | 5.91    | 7.25    | 0.15    |        | 0.10   | 0.12   | 0.29    |        |
| Georgia  | (2.02, | (2.24, | (0.67,  | <0.001 | (0.09, | (0.06, | (0.27,  | <0.001 | (4.57,  | (5.25,  | (-0.73, | 0.740  | (0.00, | (0.00, | (-1.77, | 0.782  |
|          | 4.18)  | 5.64)  | 0.76)   |        | 0.96)  | 1.50)  | 0.48)   |        | 7.56)   | 9.86)   | 1.04)   |        | 0.56)  | 1.07)  | 2.40)   |        |
|          | 6.30   | 7.18   | 0.43    |        | 1.48   | 1.22   | -0.69   |        | 6.08    | 5.09    | -0.66   |        | 0.10   | 0.08   | -0.79   |        |
| Germany  | (5.90, | (6.72, | (0.39,  | <0.001 | (1.28, | (1.03, | (-0.80, | <0.001 | (5.69,  | (4.70,  | (-1.07, | 0.002  | (0.05, | (0.04, | (-1.87, | 0.150  |
|          | 6.73)  | 7.68)  | 0.46)   |        | 1.69)  | 1.45)  | -0.58)  |        | 6.51)   | 5.51)   | -0.24)  |        | 0.17)  | 0.16)  | 0.29)   |        |

|               |        |        |        |        |        |        |         |        |         |         |         |        |        |        |         |        |
|---------------|--------|--------|--------|--------|--------|--------|---------|--------|---------|---------|---------|--------|--------|--------|---------|--------|
|               | 4.15   | 4.22   | 0.04   |        | 1.27   | 1.32   | 0.13    |        | 33.24   | 20.29   | -1.69   |        | 0.57   | 0.35   | -1.66   |        |
| Ghana         | (3.43, | (3.75, | (0.00, | 0.038  | (0.89, | (1.07, | (0.05,  | 0.001  | (31.12, | (19.24, | (-1.94, | <0.001 | (0.32, | (0.22, | (-2.07, | <0.001 |
|               | 4.98)  | 4.73)  | 0.08)  |        | 1.77)  | 1.63)  | 0.21)   |        | 35.48)  | 21.39)  | -1.43)  |        | 0.94)  | 0.52)  | -1.24)  |        |
|               | 5.14   | 5.88   | 0.48   |        | 0.76   | 0.73   | -0.14   |        | 2.40    | 2.79    | 0.63    |        | 0.04   | 0.05   | 0.78    |        |
| Greece        | (4.17, | (4.70, | (0.44, | <0.001 | (0.42, | (0.36, | (-0.21, | <0.001 | (1.75,  | (1.99,  | (-0.07, | 0.078  | (0.00, | (0.00, | (0.78,  | <0.001 |
|               | 6.28)  | 7.29)  | 0.52)  |        | 1.27)  | 1.36)  | -0.07)  |        | 3.22)   | 3.82)   | 1.34)   |        | 0.28)  | 0.40)  | 0.78)   |        |
|               | 4.82   | 5.03   | 0.17   |        | 1.10   | 0.92   | -0.60   |        | 3.34    | 3.03    | -0.35   |        | 0.06   | 0.05   | -0.69   |        |
| Greenland     | (0.01, | (0.01, | (0.11, | <0.001 | (0.00, | (0.00, | (-0.81, | <0.001 | (0.00,  | (0.00,  | (-0.62, | 0.014  | (0.00, | (0.00, | (-1.11, | 0.001  |
|               | 54.40) | 53.72) | 0.23)  |        | 48.54) | 46.52) | -0.39)  |        | 52.03)  | 50.17)  | -0.07)  |        | 46.93) | 44.97) | -0.27)  |        |
|               | 8.72   | 13.34  | 1.44   |        | 1.46   | 1.89   | 0.89    |        | 61.49   | 46.78   | -0.94   |        | 1.03   | 0.79   | -0.90   |        |
| Grenada       | (0.50, | (2.26, | (1.34, | <0.001 | (0.00, | (0.00, | (0.81,  | <0.001 | (28.97, | (21.27, | (-1.47, | 0.001  | (0.00, | (0.00, | (-1.54, | 0.006  |
|               | 42.96) | 44.12) | 1.53)  |        | 30.71) | 25.57) | 0.98)   |        | 116.57) | 90.42)  | -0.41)  |        | 29.99) | 23.60) | -0.26)  |        |
|               | 7.12   | 12.07  | 1.85   |        | 1.44   | 1.91   | 0.98    |        | 16.15   | 42.67   | 3.40    |        | 0.27   | 0.73   | 3.45    |        |
| Guam          | (0.88, | (2.83, | (1.82, | <0.001 | (0.00, | (0.00, | (0.91,  | <0.001 | (4.94,  | (22.01, | (2.84,  | <0.001 | (0.00, | (0.00, | (2.80,  | <0.001 |
|               | 26.15) | 33.87) | 1.88)  |        | 16.65) | 17.72) | 1.06)   |        | 39.46)  | 75.06)  | 3.97)   |        | 14.44) | 15.56) | 4.11)   |        |
|               | 3.19   | 4.62   | 1.29   |        | 0.34   | 0.55   | 1.70    |        | 6.62    | 9.50    | 1.10    |        | 0.11   | 0.16   | 1.06    |        |
| Guatemala     | (2.33, | (3.97, | (1.25, | <0.001 | (0.11, | (0.35, | (1.62,  | <0.001 | (5.36,  | (8.57,  | (-0.03, | 0.056  | (0.01, | (0.06, | (-0.32, | 0.132  |
|               | 4.29)  | 5.35)  | 1.34)  |        | 0.82)  | 0.84)  | 1.77)   |        | 8.12)   | 10.51)  | 2.24)   |        | 0.50)  | 0.34)  | 2.45)   |        |
|               | 2.88   | 3.41   | 0.63   |        | 0.63   | 0.74   | 0.57    |        | 19.76   | 13.64   | -1.29   |        | 0.34   | 0.23   | -1.32   |        |
| Guinea        | (1.98, | (2.72, | (0.54, | <0.001 | (0.26, | (0.44, | (0.45,  | <0.001 | (17.22, | (12.22, | (-1.49, | <0.001 | (0.08, | (0.08, | (-1.56, | <0.001 |
|               | 4.07)  | 4.22)  | 0.71)  |        | 1.32)  | 1.18)  | 0.70)   |        | 22.58)  | 15.20)  | -1.10)  |        | 0.93)  | 0.53)  | -1.09)  |        |
|               | 2.97   | 3.59   | 0.72   |        | 0.37   | 0.45   | 0.71    |        | 17.70   | 11.58   | -1.48   |        | 0.30   | 0.20   | -1.47   |        |
| Guinea-Bissau | (1.06, | (2.00, | (0.63, | <0.001 | (0.00, | (0.05, | (0.58,  | <0.001 | (12.12, | (8.47,  | (-1.69, | <0.001 | (0.00, | (0.00, | (-1.89, | <0.001 |
|               | 6.85)  | 6.04)  | 0.81)  |        | 3.05)  | 1.86)  | 0.84)   |        | 25.12)  | 15.52)  | -1.27)  |        | 2.96)  | 1.47)  | -1.06)  |        |
|               | 5.61   | 12.39  | 2.75   |        | 0.85   | 1.41   | 1.76    |        | 37.37   | 71.61   | 2.41    |        | 0.62   | 1.20   | 2.47    |        |
| Guyana        | (2.58, | (7.49, | (2.64, | <0.001 | (0.05, | (0.20, | (1.62,  | <0.001 | (28.59, | (59.06, | (0.98,  | 0.001  | (0.02, | (0.13, | (1.18,  | <0.001 |
|               | 10.88) | 19.40) | 2.87)  |        | 4.21)  | 5.01)  | 1.90)   |        | 48.19)  | 86.14)  | 3.86)   |        | 3.88)  | 4.69)  | 3.78)   |        |
|               | 3.90   | 6.69   | 1.93   |        | 0.32   | 0.58   | 2.06    |        | 31.70   | 30.29   | -0.13   |        | 0.53   | 0.50   | -0.15   |        |
| Haiti         | (2.88, | (5.76, | (1.81, | <0.001 | (0.09, | (0.33, | (1.92,  | <0.001 | (28.64, | (28.27, | (-0.51, | 0.501  | (0.20, | (0.27, | (-0.59, | 0.498  |
|               | 5.18)  | 7.73)  | 2.06)  |        | 0.85)  | 0.94)  | 2.21)   |        | 35.02)  | 32.41)  | 0.25)   |        | 1.14)  | 0.85)  | 0.29)   |        |
|               | 3.50   | 5.17   | 1.37   |        | 0.31   | 0.50   | 1.67    |        | 7.00    | 5.05    | -1.12   |        | 0.12   | 0.09   | -0.94   |        |
| Honduras      | (2.34, | (4.24, | (1.33, | <0.001 | (0.05, | (0.24, | (1.57,  | <0.001 | (5.30,  | (4.12,  | (-1.51, | <0.001 | (0.00, | (0.01, | (-1.43, | <0.001 |
|               | 5.08)  | 6.24)  | 1.41)  |        | 1.05)  | 0.91)  | 1.76)   |        | 9.10)   | 6.12)   | -0.72)  |        | 0.76)  | 0.35)  | -0.46)  |        |

|                               |        |        |         |        |        |        |         |        |         |         |         |        |        |        |         |        |
|-------------------------------|--------|--------|---------|--------|--------|--------|---------|--------|---------|---------|---------|--------|--------|--------|---------|--------|
|                               | 5.18   | 5.89   | 0.45    |        | 0.58   | 0.60   | 0.13    |        | 4.70    | 6.54    | 1.02    |        | 0.08   | 0.11   | 1.19    |        |
| Hungary                       | (4.19, | (4.69, | (0.41,  | <0.001 | (0.28, | (0.27, | (0.06,  | <0.001 | (3.76,  | (5.29,  | (0.56,  | <0.001 | (0.01, | (0.01, | (0.61,  | <0.001 |
|                               | 6.34)  | 7.32)  | 0.49)   |        | 1.07)  | 1.20)  | 0.21)   |        | 5.82)   | 8.04)   | 1.50)   |        | 0.37)  | 0.52)  | 1.77)   |        |
|                               | 4.85   | 5.82   | 0.64    |        | 0.74   | 0.75   | 0.05    |        | 1.43    | 1.52    | 0.22    |        | 0.02   | 0.02   | 0.97    |        |
| Iceland                       | (0.80, | (1.37, | (0.49,  | <0.001 | (0.00, | (0.00, | (-0.01, | 0.098  | (0.01,  | (0.03,  | (0.09,  | 0.001  | (0.00, | (0.00, | (-0.78, | 0.278  |
|                               | 16.01) | 16.78) | 0.78)   |        | 9.28)  | 8.91)  | 0.11)   |        | 10.49)  | 10.18)  | 0.35)   |        | 7.92)  | 7.61)  | 2.76)   |        |
|                               | 2.94   | 4.11   | 1.19    |        | 0.34   | 0.44   | 1.00    |        | 9.59    | 9.39    | -0.12   |        | 0.16   | 0.16   | 0.06    |        |
| India                         | (2.86, | (4.03, | (1.10,  | <0.001 | (0.31, | (0.42, | (0.79,  | <0.001 | (9.44,  | (9.28,  | (-0.70, | 0.682  | (0.14, | (0.14, | (-0.92, | 0.906  |
|                               | 3.03)  | 4.18)  | 1.29)   |        | 0.37)  | 0.47)  | 1.22)   |        | 9.74)   | 9.51)   | 0.46)   |        | 0.18)  | 0.17)  | 1.04)   |        |
|                               | 5.04   | 6.35   | 0.79    |        | 1.14   | 1.32   | 0.51    |        | 32.40   | 23.68   | -1.10   |        | 0.54   | 0.40   | -1.05   |        |
| Indonesia                     | (4.82, | (6.14, | (0.75,  | <0.001 | (1.03, | (1.22, | (0.46,  | <0.001 | (31.82, | (23.27, | (-1.33, | <0.001 | (0.47, | (0.35, | (-1.34, | <0.001 |
|                               | 5.27)  | 6.57)  | 0.84)   |        | 1.25)  | 1.42)  | 0.56)   |        | 32.98)  | 24.10)  | -0.88)  |        | 0.62)  | 0.45)  | -0.77)  |        |
|                               | 5.07   | 6.51   | 0.87    |        | 0.77   | 0.90   | 0.56    |        | 6.41    | 5.53    | -0.51   |        | 0.10   | 0.09   | -0.68   |        |
| Iran (Islamic<br>Republic of) | (4.65, | (6.13, | (0.83,  | <0.001 | (0.61, | (0.77, | (0.50,  | <0.001 | (5.93,  | (5.18,  | (-0.76, | <0.001 | (0.05, | (0.05, | (-0.97, | <0.001 |
|                               | 5.53)  | 6.91)  | 0.92)   |        | 0.96)  | 1.06)  | 0.62)   |        | 6.92)   | 5.90)   | -0.25)  |        | 0.19)  | 0.15)  | -0.39)  |        |
|                               | 4.20   | 5.14   | 0.71    |        | 0.52   | 0.61   | 0.56    |        | 5.67    | 4.56    | -0.81   |        | 0.09   | 0.08   | -0.55   |        |
| Iraq                          | (3.49, | (4.67, | (0.65,  | <0.001 | (0.29, | (0.45, | (0.51,  | <0.001 | (4.85,  | (4.12,  | (-1.09, | <0.001 | (0.02, | (0.03, | (-1.24, | 0.119  |
|                               | 5.01)  | 5.64)  | 0.76)   |        | 0.86)  | 0.80)  | 0.61)   |        | 6.61)   | 5.03)   | -0.52)  |        | 0.31)  | 0.17)  | 0.14)   |        |
|                               | 5.66   | 6.67   | 0.57    |        | 1.03   | 0.94   | -0.30   |        | 3.87    | 3.30    | -0.59   |        | 0.06   | 0.06   | -0.17   |        |
| Ireland                       | (4.00, | (5.02, | (0.53,  | <0.001 | (0.41, | (0.40, | (-0.34, | <0.001 | (2.52,  | (2.19,  | (-1.42, | 0.171  | (0.00, | (0.00, | (-0.63, | 0.460  |
|                               | 7.77)  | 8.72)  | 0.61)   |        | 2.14)  | 1.93)  | -0.25)  |        | 5.68)   | 4.82)   | 0.25)   |        | 0.70)  | 0.63)  | 0.29)   |        |
|                               | 5.18   | 6.23   | 0.64    |        | 0.85   | 0.84   | -0.08   |        | 3.86    | 2.66    | -1.32   |        | 0.06   | 0.04   | -1.38   |        |
| Israel                        | (3.84, | (5.07, | (0.60,  | <0.001 | (0.37, | (0.45, | (-0.15, | 0.025  | (2.71,  | (1.93,  | (-1.75, | <0.001 | (0.00, | (0.00, | (-1.74, | <0.001 |
|                               | 6.85)  | 7.59)  | 0.68)   |        | 1.69)  | 1.43)  | -0.01)  |        | 5.33)   | 3.59)   | -0.89)  |        | 0.53)  | 0.32)  | -1.02)  |        |
|                               | 7.16   | 4.43   | -1.73   |        | 1.19   | 0.82   | -1.29   |        | 1.63    | 3.87    | 2.99    |        | 0.03   | 0.06   | 2.44    |        |
| Italy                         | (6.66, | (3.98, | (-2.03, | <0.001 | (0.99, | (0.63, | (-1.41, | <0.001 | (1.39,  | (3.44,  | (2.34,  | <0.001 | (0.00, | (0.02, | (0.87,  | 0.002  |
|                               | 7.69)  | 4.93)  | -1.42)  |        | 1.41)  | 1.05)  | -1.18)  |        | 1.89)   | 4.33)   | 3.65)   |        | 0.08)  | 0.15)  | 4.04)   |        |
|                               | 5.64   | 12.45  | 2.74    |        | 1.08   | 1.73   | 1.64    |        | 20.36   | 36.97   | 2.28    |        | 0.34   | 0.62   | 2.30    |        |
| Jamaica                       | (3.70, | (9.78, | (2.67,  | <0.001 | (0.36, | (0.84, | (1.58,  | <0.001 | (16.51, | (32.29, | (1.16,  | <0.001 | (0.03, | (0.16, | (1.19,  | <0.001 |
|                               | 8.32)  | 15.63) | 2.82)   |        | 2.61)  | 3.17)  | 1.70)   |        | 24.93)  | 42.17)  | 3.42)   |        | 1.56)  | 1.67)  | 3.42)   |        |
|                               | 6.38   | 5.33   | -0.62   |        | 1.79   | 1.49   | -0.64   |        | 3.34    | 3.28    | -0.06   |        | 0.05   | 0.05   | -0.28   |        |
| Japan                         | (6.05, | (4.98, | (-0.65, | <0.001 | (1.61, | (1.30, | (-0.74, | <0.001 | (3.10,  | (3.00,  | (-0.39, | 0.711  | (0.03, | (0.02, | (-0.85, | 0.328  |
|                               | 6.72)  | 5.70)  | -0.59)  |        | 1.97)  | 1.69)  | -0.53)  |        | 3.59)   | 3.57)   | 0.27)   |        | 0.09)  | 0.10)  | 0.29)   |        |

|              |        |        |         |        |        |        |        |        |         |          |         |        |        |        |         |        |
|--------------|--------|--------|---------|--------|--------|--------|--------|--------|---------|----------|---------|--------|--------|--------|---------|--------|
|              | 6.58   | 6.13   | -0.27   |        | 1.85   | 1.90   | 0.08   |        | 19.46   | 9.00     | -2.59   |        | 0.33   | 0.15   | -2.63   |        |
| Jordan       | (4.66, | (5.14, | (-0.32, | <0.001 | (0.91, | (1.36, | (0.01, | 0.024  | (16.00, | (7.78,   | (-3.26, | <0.001 | (0.04, | (0.03, | (-3.29, | <0.001 |
|              | 9.10)  | 7.26)  | -0.21)  |        | 3.44)  | 2.58)  | 0.14)  |        | 23.49)  | 10.36)   | -1.92)  |        | 1.37)  | 0.43)  | -1.97)  |        |
|              | 2.69   | 3.37   | 0.79    |        | 0.26   | 0.31   | 0.60   |        | 4.57    | 7.96     | 1.90    |        | 0.08   | 0.14   | 1.91    |        |
| Kazakhstan   | (2.17, | (2.79, | (0.74,  | <0.001 | (0.12, | (0.15, | (0.40, | <0.001 | (3.88,  | (7.07,   | (1.08,  | <0.001 | (0.01, | (0.04, | (1.44,  | <0.001 |
|              | 3.31)  | 4.05)  | 0.84)   |        | 0.50)  | 0.57)  | 0.81)  |        | 5.35)   | 8.94)    | 2.73)   |        | 0.25)  | 0.34)  | 2.39)   |        |
|              | 3.25   | 3.72   | 0.54    |        | 1.16   | 1.20   | 0.12   |        | 13.73   | 12.78    | -0.25   |        | 0.23   | 0.21   | -0.40   |        |
| Kenya        | (2.72, | (3.36, | (0.31,  | <0.001 | (0.86, | (1.00, | (0.03, | 0.008  | (12.60, | (12.10,  | (-0.45, | 0.013  | (0.10, | (0.13, | (-1.00, | 0.201  |
|              | 3.86)  | 4.10)  | 0.76)   |        | 1.56)  | 1.43)  | 0.20)  |        | 14.95)  | 13.49)   | -0.05)  |        | 0.46)  | 0.33)  | 0.21)   |        |
|              | 11.99  | 14.15  | 0.55    |        | 1.45   | 1.64   | 0.42   |        | 124.29  | 163.55   | 0.92    |        | 2.14   | 2.80   | 0.90    |        |
| Kiribati     | (1.20, | (3.39, | (0.48,  | <0.001 | (0.00, | (0.00, | (0.33, | <0.001 | (73.89, | (116.73, | (0.72,  | <0.001 | (0.00, | (0.02, | (0.66,  | <0.001 |
|              | 49.50) | 39.23) | 0.61)   |        | 32.13) | 19.25) | 0.51)  |        | 197.78) | 223.25)  | 1.13)   |        | 33.44) | 21.38) | 1.14)   |        |
|              | 4.59   | 5.73   | 0.77    |        | 0.94   | 1.08   | 0.49   |        | 5.29    | 4.52     | -0.54   |        | 0.09   | 0.07   | -0.89   |        |
| Kuwait       | (2.64, | (4.29, | (0.72,  | <0.001 | (0.22, | (0.51, | (0.44, | <0.001 | (3.18,  | (3.24,   | (-1.28, | 0.160  | (0.00, | (0.00, | (-1.34, | <0.001 |
|              | 7.50)  | 7.62)  | 0.81)   |        | 2.70)  | 2.15)  | 0.54)  |        | 8.34)   | 6.25)    | 0.21)   |        | 1.36)  | 0.81)  | -0.43)  |        |
|              | 2.53   | 3.01   | 0.61    |        | 0.24   | 0.28   | 0.57   |        | 3.61    | 3.77     | 0.02    |        | 0.06   | 0.06   | -0.21   |        |
| Kyrgyzstan   | (1.59, | (2.14, | (0.56,  | <0.001 | (0.03, | (0.07, | (0.45, | <0.001 | (2.46,  | (2.79,   | (-0.48, | 0.947  | (0.00, | (0.00, | (-0.74, | 0.435  |
|              | 3.85)  | 4.11)  | 0.65)   |        | 0.90)  | 0.76)  | 0.70)  |        | 5.14)   | 4.99)    | 0.51)   |        | 0.61)  | 0.43)  | 0.32)   |        |
| Lao People's | 3.46   | 4.82   | 1.17    |        | 0.48   | 0.63   | 0.98   |        | 15.58   | 25.23    | 1.72    |        | 0.26   | 0.42   | 1.66    |        |
| Democratic   | (2.26, | (3.79, | (1.11,  | <0.001 | (0.12, | (0.30, | (0.85, | <0.001 | (12.86, | (22.78,  | (1.50,  | <0.001 | (0.03, | (0.16, | (1.41,  | <0.001 |
| Republic     | 5.11)  | 6.06)  | 1.23)   |        | 1.36)  | 1.18)  | 1.11)  |        | 18.74)  | 27.89)   | 1.94)   |        | 1.05)  | 0.91)  | 1.92)   |        |
|              | 5.27   | 6.61   | 0.76    |        | 0.50   | 0.61   | 0.70   |        | 5.63    | 4.16     | -1.09   |        | 0.09   | 0.07   | -0.75   |        |
| Latvia       | (3.42, | (3.92, | (0.65,  | <0.001 | (0.08, | (0.05, | (0.36, | <0.001 | (3.70,  | (2.10,   | (-1.59, | <0.001 | (0.00, | (0.00, | (-2.50, | 0.411  |
|              | 7.82)  | 10.66) | 0.87)   |        | 1.73)  | 2.84)  | 1.04)  |        | 8.26)   | 7.63)    | -0.59)  |        | 1.07)  | 1.99)  | 1.04)   |        |
|              | 4.44   | 5.72   | 0.87    |        | 0.67   | 0.82   | 0.69   |        | 7.71    | 4.77     | -1.64   |        | 0.13   | 0.08   | -1.65   |        |
| Lebanon      | (2.90, | (4.34, | (0.84,  | <0.001 | (0.18, | (0.36, | (0.56, | <0.001 | (5.62,  | (3.51,   | (-1.80, | <0.001 | (0.00, | (0.00, | (-2.00, | <0.001 |
|              | 6.53)  | 7.45)  | 0.90)   |        | 1.77)  | 1.66)  | 0.82)  |        | 10.34)  | 6.38)    | -1.47)  |        | 0.94)  | 0.63)  | -1.29)  |        |
|              | 3.76   | 4.56   | 0.68    |        | 0.86   | 0.89   | 0.13   |        | 19.81   | 21.42    | 0.21    |        | 0.33   | 0.36   | 0.20    |        |
| Lesotho      | (1.98, | (2.82, | (0.57,  | <0.001 | (0.18, | (0.25, | (0.00, | 0.046  | (15.27, | (17.38,  | (-0.50, | 0.566  | (0.01, | (0.03, | (-0.86, | 0.713  |
|              | 6.65)  | 7.01)  | 0.78)   |        | 2.77)  | 2.32)  | 0.26)  |        | 25.39)  | 26.15)   | 0.91)   |        | 2.02)  | 1.53)  | 1.28)   |        |
|              | 2.92   | 3.50   | 0.66    |        | 0.62   | 0.74   | 0.58   |        | 19.83   | 10.70    | -2.13   |        | 0.34   | 0.18   | -2.16   |        |
| Liberia      | (1.42, | (2.43, | (0.48,  | <0.001 | (0.08, | (0.31, | (0.43, | <0.001 | (15.37, | (8.73,   | (-2.43, | <0.001 | (0.01, | (0.02, | (-2.45, | <0.001 |
|              | 5.37)  | 4.90)  | 0.83)   |        | 2.22)  | 1.54)  | 0.74)  |        | 25.20)  | 12.99)   | -1.82)  |        | 1.77)  | 0.74)  | -1.87)  |        |

|                  |        |        |         |        |        |        |         |        |         |         |         |        |        |        |         |        |
|------------------|--------|--------|---------|--------|--------|--------|---------|--------|---------|---------|---------|--------|--------|--------|---------|--------|
|                  | 3.60   | 4.77   | 0.96    |        | 0.53   | 0.67   | 0.78    |        | 6.87    | 6.42    | -0.18   |        | 0.11   | 0.11   | -0.18   |        |
| Libya            | (2.31, | (3.72, | (0.93,  | <0.001 | (0.13, | (0.32, | (0.70,  | <0.001 | (5.04,  | (5.18,  | (-0.59, | 0.391  | (0.00, | (0.01, | (-1.07, | 0.693  |
|                  | 5.45)  | 6.03)  | 0.99)   |        | 1.55)  | 1.25)  | 0.86)   |        | 9.21)   | 7.86)   | 0.23)   |        | 0.94)  | 0.46)  | 0.72)   |        |
|                  | 4.62   | 5.96   | 0.86    |        | 0.55   | 0.65   | 0.54    |        | 6.87    | 5.96    | -0.82   |        | 0.11   | 0.10   | -0.87   |        |
| Lithuania        | (3.17, | (3.85, | (0.79,  | <0.001 | (0.14, | (0.12, | (0.31,  | <0.001 | (5.08,  | (3.88,  | (-1.36, | 0.003  | (0.00, | (0.00, | (-1.55, | 0.013  |
|                  | 6.54)  | 8.94)  | 0.93)   |        | 1.47)  | 2.21)  | 0.77)   |        | 9.12)   | 8.89)   | -0.28)  |        | 0.80)  | 1.37)  | -0.18)  |        |
|                  | 5.04   | 6.14   | 0.67    |        | 1.95   | 1.67   | -0.54   |        | 5.32    | 6.51    | 0.72    |        | 0.09   | 0.11   | 0.67    |        |
| Luxembourg       | (1.27, | (2.37, | (0.61,  | <0.001 | (0.12, | (0.15, | (-0.58, | <0.001 | (1.42,  | (2.58,  | (0.31,  | 0.001  | (0.00, | (0.00, | (-0.07, | 0.074  |
|                  | 14.94) | 13.76) | 0.72)   |        | 10.53) | 7.60)  | -0.49)  |        | 15.30)  | 14.28)  | 1.13)   |        | 7.65)  | 5.12)  | 1.42)   |        |
|                  | 5.25   | 4.47   | -0.57   |        | 1.21   | 1.24   | 0.08    |        | 58.12   | 31.12   | -2.21   |        | 0.97   | 0.52   | -2.22   |        |
| Madagascar       | (4.32, | (3.91, | (-0.63, | <0.001 | (0.79, | (0.96, | (-0.01, | 0.070  | (54.92, | (29.62, | (-2.60, | <0.001 | (0.59, | (0.34, | (-2.86, | <0.001 |
|                  | 6.34)  | 5.08)  | -0.52)  |        | 1.79)  | 1.59)  | 0.16)   |        | 61.48)  | 32.68)  | -1.82)  |        | 1.52)  | 0.76)  | -1.58)  |        |
|                  | 2.86   | 3.35   | 0.60    |        | 0.75   | 0.84   | 0.40    |        | 19.64   | 13.59   | -1.27   |        | 0.33   | 0.22   | -1.37   |        |
| Malawi           | (2.13, | (2.79, | (0.43,  | <0.001 | (0.40, | (0.58, | (0.24,  | <0.001 | (17.60, | (12.42, | (-1.56, | <0.001 | (0.11, | (0.10, | (-1.62, | <0.001 |
|                  | 3.80)  | 4.00)  | 0.77)   |        | 1.31)  | 1.20)  | 0.57)   |        | 21.87)  | 14.84)  | -0.98)  |        | 0.77)  | 0.45)  | -1.11)  |        |
|                  | 6.22   | 7.61   | 0.69    |        | 2.52   | 2.79   | 0.36    |        | 34.45   | 25.50   | -1.00   |        | 0.57   | 0.42   | -1.00   |        |
| Malaysia         | (5.43, | (6.95, | (0.61,  | <0.001 | (2.03, | (2.40, | (0.32,  | <0.001 | (32.57, | (24.29, | (-1.20, | <0.001 | (0.35, | (0.28, | (-1.20, | <0.001 |
|                  | 7.09)  | 8.31)  | 0.76)   |        | 3.10)  | 3.22)  | 0.40)   |        | 36.41)  | 26.75)  | -0.79)  |        | 0.88)  | 0.61)  | -0.81)  |        |
|                  | 4.43   | 5.85   | 0.93    |        | 0.80   | 0.97   | 0.64    |        | 17.64   | 6.10    | -3.47   |        | 0.29   | 0.10   | -3.55   |        |
| Maldives         | (0.35, | (1.96, | (0.80,  | <0.001 | (0.00, | (0.01, | (0.60,  | <0.001 | (6.71,  | (2.10,  | (-4.08, | <0.001 | (0.00, | (0.00, | (-4.17, | <0.001 |
|                  | 22.21) | 14.36) | 1.06)   |        | 16.70) | 7.35)  | 0.68)   |        | 40.50)  | 14.72)  | -2.87)  |        | 15.94) | 5.96)  | -2.92)  |        |
|                  | 3.26   | 3.78   | 0.52    |        | 0.70   | 0.79   | 0.39    |        | 28.28   | 16.80   | -1.75   |        | 0.48   | 0.28   | -1.85   |        |
| Mali             | (2.42, | (3.19, | (0.48,  | <0.001 | (0.34, | (0.53, | (0.31,  | <0.001 | (25.62, | (15.52, | (-1.90, | <0.001 | (0.19, | (0.14, | (-2.33, | <0.001 |
|                  | 4.32)  | 4.44)  | 0.55)   |        | 1.29)  | 1.13)  | 0.46)   |        | 31.16)  | 18.18)  | -1.60)  |        | 1.02)  | 0.53)  | -1.37)  |        |
|                  | 5.86   | 7.35   | 0.78    |        | 1.47   | 1.26   | -0.55   |        | 3.71    | 6.33    | 1.90    |        | 0.06   | 0.10   | 1.72    |        |
| Malta            | (1.60, | (2.36, | (0.75,  | <0.001 | (0.04, | (0.02, | (-0.60, | <0.001 | (0.62,  | (1.78,  | (1.63,  | <0.001 | (0.00, | (0.00, | (0.78,  | <0.001 |
|                  | 15.63) | 18.69) | 0.82)   |        | 9.06)  | 10.00) | -0.50)  |        | 12.54)  | 17.36)  | 2.18)   |        | 6.61)  | 8.14)  | 2.67)   |        |
|                  | 6.68   | 10.32  | 1.52    |        | 0.87   | 1.14   | 0.95    |        | 36.26   | 82.83   | 2.86    |        | 0.63   | 1.42   | 2.84    |        |
| Marshall Islands | (0.01, | (0.42, | (1.47,  | <0.001 | (0.00, | (0.00, | (0.83,  | <0.001 | (6.65,  | (38.74, | (2.74,  | <0.001 | (0.00, | (0.00, | (2.60,  | <0.001 |
|                  | 68.59) | 52.29) | 1.56)   |        | 58.41) | 35.75) | 1.07)   |        | 116.18) | 155.43) | 2.98)   |        | 58.03) | 36.32) | 3.07)   |        |
|                  | 3.40   | 3.68   | 0.31    |        | 0.78   | 0.86   | 0.36    |        | 18.75   | 7.40    | -3.14   |        | 0.32   | 0.12   | -3.19   |        |
| Mauritania       | (1.80, | (2.47, | (0.23,  | <0.001 | (0.16, | (0.34, | (0.23,  | <0.001 | (14.58, | (5.60,  | (-3.36, | <0.001 | (0.01, | (0.00, | (-3.40, | <0.001 |
|                  | 5.92)  | 5.32)  | 0.40)   |        | 2.45)  | 1.85)  | 0.50)   |        | 23.82)  | 9.63)   | -2.93)  |        | 1.74)  | 0.79)  | -2.98)  |        |



|                   |         |         |        |        |         |         |         |        |         |         |         |        |         |         |                     |        |
|-------------------|---------|---------|--------|--------|---------|---------|---------|--------|---------|---------|---------|--------|---------|---------|---------------------|--------|
|                   | 4.99    | 7.98    | 1.63   |        | 1.28    | 1.51    | 0.57    |        | 13.27   | 27.87   | 2.38    |        | 0.22    | 0.47    | 2.41                |        |
| Mauritius         | (2.60,  | (4.79,  | (1.56, | <0.001 | (0.28,  | (0.37,  | (0.49,  | <0.001 | (9.13,  | (21.54, | (0.75,  | 0.004  | (0.00,  | (0.02,  | (1.34,              | <0.001 |
|                   | 8.72)   | 12.58)  | 1.70)  |        | 3.72)   | 4.19)   | 0.66)   |        | 18.69)  | 35.54)  | 4.04)   |        | 2.03)   | 2.58)   | 3.49)               |        |
|                   | 5.12    | 5.52    | 0.26   |        | 0.71    | 0.78    | 0.32    |        | 5.56    | 6.89    | 0.90    |        | 0.09    | 0.11    | 0.92                |        |
| Mexico            | (4.79,  | (5.23,  | (0.18, | <0.001 | (0.59,  | (0.68,  | (0.20,  | <0.001 | (5.21,  | (6.57,  | (0.28,  | 0.005  | (0.05,  | (0.08,  | (-0.39,             | 0.171  |
|                   | 5.47)   | 5.81)   | 0.34)  |        | 0.85)   | 0.90)   | 0.45)   |        | 5.93)   | 7.22)   | 1.53)   |        | 0.15)   | 0.16)   | 2.25)               |        |
| Micronesia        | 6.77    | 10.70   | 1.59   |        | 0.89    | 1.20    | 1.04    |        | 36.18   | 79.24   | 2.76    |        | 0.62    | 1.35    | 2.72                |        |
| (Federated States | (0.32,  | (1.37,  | (1.56, | <0.001 | (0.00,  | (0.00,  | (0.96,  | <0.001 | (13.77, | (44.43, | (2.66,  | <0.001 | (0.00,  | (0.00,  | (2.51,              | <0.001 |
| of)               | 35.92)  | 39.73)  | 1.63)  |        | 26.07)  | 24.01)  | 1.11)   |        | 78.89)  | 131.55) | 2.85)   |        | 25.64)  | 24.35)  | 2.94)               |        |
|                   | 5.68    | 6.66    | 0.55   |        | 1.19    | 1.06    | -0.43   |        | 7.28    | 6.25    | -0.52   |        | 0.12    | 0.10    | -0.57               |        |
| Monaco            | (0.00,  | (0.00,  | (0.51, | <0.001 | (0.00,  | (0.00,  | (-0.46, | <0.001 | (0.00,  | (0.00,  | (-0.59, | <0.001 | (0.00,  | (0.00,  | (-1.38,             | 0.168  |
|                   | 134.56) | 103.32) | 0.59)  |        | 127.76) | 93.14)  | -0.40)  |        | 136.94) | 102.63) | -0.46)  |        | 126.10) | 91.32)  | 0.24)               |        |
|                   | 2.71    | 3.47    | 0.87   |        | 0.23    | 0.29    | 0.81    |        | 3.87    | 2.89    | -0.96   |        | 0.07    | 0.05    | -1.05               |        |
| Mongolia          | (1.35,  | (2.21,  | (0.80, | <0.001 | (0.00,  | (0.03,  | (0.57,  | <0.001 | (2.18,  | (1.76,  | (-1.60, | 0.004  | (0.00,  | (0.00,  | (-1.76,             | 0.004  |
|                   | 5.04)   | 5.28)   | 0.94)  |        | 1.66)   | 1.21)   | 1.06)   |        | 6.52)   | 4.56)   | -0.30)  |        | 1.40)   | 0.83)   | -0.33)              |        |
|                   | 4.21    | 5.12    | 0.71   |        | 0.41    | 0.47    | 0.51    |        | 2.33    | 2.36    | 0.24    |        | 0.04    | 0.04    | -0.00               |        |
| Montenegro        | (1.39,  | (1.74,  | (0.57, | <0.001 | (0.00,  | (0.00,  | (0.31,  | <0.001 | (0.45,  | (0.39,  | (-0.88, | 0.674  | (0.00,  | (0.00,  | (-0.00,             | <0.001 |
|                   | 9.79)   | 11.96)  | 0.84)  |        | 3.93)   | 4.98)   | 0.71)   |        | 7.06)   | 8.00)   | 1.37)   |        | 3.22)   | 4.20)   | -0.00) <sup>†</sup> |        |
|                   | 3.74    | 5.11    | 1.09   |        | 0.45    | 0.58    | 0.90    |        | 4.07    | 4.86    | 0.62    |        | 0.07    | 0.08    | 0.47                |        |
| Morocco           | (3.22,  | (4.61,  | (1.04, | <0.001 | (0.28,  | (0.42,  | (0.84,  | <0.001 | (3.54,  | (4.37,  | (0.39,  | <0.001 | (0.02,  | (0.03,  | (-0.41,             | 0.292  |
|                   | 4.32)   | 5.66)   | 1.14)  |        | 0.68)   | 0.78)   | 0.96)   |        | 4.68)   | 5.39)   | 0.84)   |        | 0.20)   | 0.18)   | 1.36)               |        |
|                   | 2.61    | 3.59    | 1.18   |        | 0.54    | 0.69    | 0.88    |        | 12.28   | 11.24   | -0.33   |        | 0.21    | 0.19    | -0.27               |        |
| Mozambique        | (2.01,  | (3.11,  | (0.98, | <0.001 | (0.29,  | (0.49,  | (0.72,  | <0.001 | (10.91, | (10.36, | (-0.55, | 0.004  | (0.06,  | (0.09,  | (-0.58,             | 0.084  |
|                   | 3.34)   | 4.13)   | 1.38)  |        | 0.93)   | 0.95)   | 1.04)   |        | 13.79)  | 12.18)  | -0.11)  |        | 0.50)   | 0.35)   | 0.04)               |        |
|                   | 4.88    | 5.41    | 0.36   |        | 0.89    | 1.02    | 0.48    |        | 48.33   | 31.79   | -1.45   |        | 0.80    | 0.53    | -1.44               |        |
| Myanmar           | (4.41,  | (4.99,  | (0.32, | <0.001 | (0.70,  | (0.85,  | (0.42,  | <0.001 | (46.84, | (30.76, | (-1.72, | <0.001 | (0.62,  | (0.40,  | (-1.75,             | <0.001 |
|                   | 5.38)   | 5.86)   | 0.40)  |        | 1.12)   | 1.23)   | 0.55)   |        | 49.85)  | 32.85)  | -1.17)  |        | 1.02)   | 0.68)   | -1.13)              |        |
|                   | 4.27    | 4.83    | 0.42   |        | 1.24    | 1.31    | 0.20    |        | 23.14   | 14.69   | -1.51   |        | 0.39    | 0.24    | -1.63               |        |
| Namibia           | (2.16,  | (3.12,  | (0.35, | <0.001 | (0.30,  | (0.52,  | (0.12,  | <0.001 | (17.64, | (11.55, | (-2.07, | <0.001 | (0.01,  | (0.01,  | (-2.32,             | <0.001 |
|                   | 7.78)   | 7.18)   | 0.49)  |        | 3.70)   | 2.78)   | 0.29)   |        | 29.95)  | 18.45)  | -0.94)  |        | 2.50)   | 1.26)   | -0.94)              |        |
|                   | 9.92    | 12.62   | 0.81   |        | 1.23    | 1.46    | 0.58    |        | 61.05   | 88.72   | 1.28    |        | 1.05    | 1.51    | 1.26                |        |
| Nauru             | (0.00,  | (0.00,  | (0.73, | <0.001 | (0.00,  | (0.00,  | (0.48,  | <0.001 | (2.51,  | (10.12, | (1.16,  | <0.001 | (0.00,  | (0.00,  | (1.15,              | <0.001 |
|                   | 226.20) | 209.83) | 0.90)  |        | 209.57) | 188.69) | 0.69)   |        | 316.23) | 338.08) | 1.41)   |        | 209.25) | 188.84) | 1.38)               |        |

|                          |         |         |         |        |          |          |         |        |          |          |         |        |          |          |         |        |
|--------------------------|---------|---------|---------|--------|----------|----------|---------|--------|----------|----------|---------|--------|----------|----------|---------|--------|
|                          | 2.52    | 3.44    | 1.13    |        | 0.26     | 0.34     | 0.97    |        | 5.87     | 5.87     | -0.01   |        | 0.10     | 0.10     | -0.01   |        |
| Nepal                    | (2.03,  | (3.01,  | (0.99,  | <0.001 | (0.12,   | (0.22,   | (0.76,  | <0.001 | (5.10,   | (5.31,   | (-0.29, | 0.952  | (0.02,   | (0.04,   | (-0.31, | 0.968  |
|                          | 3.10)   | 3.90)   | 1.26)   |        | 0.49)    | 0.51)    | 1.18)   |        | 6.74)    | 6.48)    | 0.28)   |        | 0.28)    | 0.21)    | 0.30)   |        |
|                          | 5.21    | 6.56    | 0.80    |        | 1.19     | 1.17     | -0.06   |        | 3.06     | 5.25     | 1.89    |        | 0.05     | 0.09     | 2.20    |        |
| Netherlands              | (4.42,  | (5.62,  | (0.76,  | <0.001 | (0.83,   | (0.79,   | (-0.16, | 0.227  | (2.47,   | (4.41,   | (1.24,  | <0.001 | (0.00,   | (0.01,   | (1.62,  | <0.001 |
|                          | 6.10)   | 7.63)   | 0.84)   |        | 1.67)    | 1.68)    | 0.04)   |        | 3.77)    | 6.21)    | 2.55)   |        | 0.23)    | 0.30)    | 2.79)   |        |
|                          | 7.38    | 5.91    | -0.77   |        | 1.08     | 0.85     | -0.82   |        | 5.66     | 4.46     | -0.80   |        | 0.09     | 0.07     | -0.54   |        |
| New Zealand              | (5.50,  | (4.27,  | (-0.87, | <0.001 | (0.45,   | (0.31,   | (-1.00, | <0.001 | (4.04,   | (3.06,   | (-2.10, | 0.231  | (0.00,   | (0.00,   | (-2.14, | 0.515  |
|                          | 9.70)   | 7.99)   | -0.66)  |        | 2.19)    | 1.86)    | -0.64)  |        | 7.73)    | 6.30)    | 0.51)   |        | 0.73)    | 0.70)    | 1.09)   |        |
|                          | 4.11    | 6.38    | 1.52    |        | 0.69     | 1.06     | 1.50    |        | 16.73    | 11.19    | -1.44   |        | 0.28     | 0.19     | -1.73   |        |
| Nicaragua                | (2.74,  | (5.12,  | (1.46,  | <0.001 | (0.23,   | (0.59,   | (1.40,  | <0.001 | (13.83,  | (9.50,   | (-2.42, | 0.004  | (0.03,   | (0.03,   | (-2.38, | <0.001 |
|                          | 5.98)   | 7.87)   | 1.59)   |        | 1.71)    | 1.77)    | 1.60)   |        | 20.09)   | 13.09)   | -0.46)  |        | 1.13)    | 0.60)    | -1.06)  |        |
|                          | 2.80    | 3.36    | 0.71    |        | 0.62     | 0.74     | 0.61    |        | 15.28    | 10.14    | -1.43   |        | 0.26     | 0.17     | -1.49   |        |
| Niger                    | (1.99,  | (2.79,  | (0.57,  | <0.001 | (0.27,   | (0.49,   | (0.52,  | <0.001 | (13.21,  | (9.11,   | (-1.77, | <0.001 | (0.06,   | (0.06,   | (-1.92, | <0.001 |
|                          | 3.89)   | 4.01)   | 0.85)   |        | 1.26)    | 1.09)    | 0.70)   |        | 17.62)   | 11.26)   | -1.09)  |        | 0.78)    | 0.39)    | -1.06)  |        |
|                          | 3.67    | 3.82    | 0.23    |        | 0.94     | 1.04     | 0.38    |        | 17.41    | 7.57     | -2.85   |        | 0.30     | 0.13     | -2.88   |        |
| Nigeria                  | (3.37,  | (3.64,  | (0.08,  | 0.002  | (0.79,   | (0.95,   | (0.22,  | <0.001 | (16.74,  | (7.30,   | (-3.01, | <0.001 | (0.22,   | (0.09,   | (-3.13, | <0.001 |
|                          | 3.98)   | 4.01)   | 0.38)   |        | 1.10)    | 1.15)    | 0.55)   |        | 18.10)   | 7.85)    | -2.69)  |        | 0.40)    | 0.17)    | -2.62)  |        |
|                          | 8.73    | 12.56   | 1.27    |        | 1.52     | 1.88     | 0.73    |        | 38.35    | 44.49    | 0.49    |        | 0.66     | 0.76     | 0.48    |        |
| Niue                     | (0.00,  | (0.00,  | 1.27    |        | 1.52     | 1.88     | 0.73    |        | 38.35    | 44.49    | 0.49    |        | 0.66     | 0.76     | 0.48    |        |
|                          | 1057.39 | 1486.39 | (1.12,  | <0.001 | (0.00,   | (0.00,   | (0.67,  | <0.001 | (0.00,   | (0.00,   | (0.23,  | <0.001 | (0.00,   | (0.00,   | (0.14,  | 0.006  |
|                          | )       | )       | 1.43)   |        | 1042.82) | 1465.22) | 0.79)   |        | 1116.64) | 1549.18) | 0.75)   |        | 1041.10) | 1462.98) | 0.82)   |        |
|                          | 3.61    | 4.66    | 0.89    |        | 0.39     | 0.46     | 0.61    |        | 6.95     | 3.88     | -2.09   |        | 0.12     | 0.07     | -1.72   |        |
| North Macedonia          | (1.99,  | (2.74,  | (0.85,  | <0.001 | (0.03,   | (0.04,   | (0.38,  | <0.001 | (4.61,   | (2.17,   | (-2.80, | <0.001 | (0.00,   | (0.00,   | (-2.31, | <0.001 |
|                          | 6.03)   | 7.58)   | 0.93)   |        | 1.66)    | 2.09)    | 0.83)   |        | 10.08)   | 6.58)    | -1.38)  |        | 1.19)    | 1.48)    | -1.12)  |        |
|                          | 7.39    | 10.64   | 1.26    |        | 1.25     | 1.57     | 0.76    |        | 19.15    | 28.15    | 1.37    |        | 0.33     | 0.49     | 1.40    |        |
| Northern Mariana Islands | (0.11,  | (0.02,  | (1.23,  | <0.001 | (0.00,   | (0.00,   | (0.69,  | <0.001 | (2.79,   | (1.49,   | (1.13,  | <0.001 | (0.00,   | (0.00,   | (1.16,  | <0.001 |
|                          | 49.98)  | 116.09) | 1.29)   |        | 39.32)   | 101.25)  | 0.82)   |        | 68.45)   | 145.64)  | 1.60)   |        | 37.62)   | 99.55)   | 1.65)   |        |
|                          | 7.38    | 6.13    | -0.67   |        | 1.15     | 1.29     | 0.39    |        | 3.55     | 3.00     | -0.68   |        | 0.06     | 0.05     | -0.53   |        |
| Norway                   | (5.60,  | (4.59,  | (-0.72, | <0.001 | (0.53,   | (0.66,   | (0.25,  | <0.001 | (2.37,   | (1.98,   | (-1.13, | 0.002  | (0.00,   | (0.00,   | (-1.09, | 0.065  |
|                          | 9.56)   | 8.05)   | -0.63)  |        | 2.20)    | 2.33)    | 0.52)   |        | 5.14)    | 4.40)    | -0.24)  |        | 0.64)    | 0.61)    | 0.03)   |        |
|                          | 3.92    | 5.30    | 1.04    |        | 0.63     | 0.81     | 0.86    |        | 5.92     | 6.09     | 0.16    |        | 0.10     | 0.10     | 0.33    |        |
| Oman                     | (1.95,  | (3.80,  | (0.99,  | <0.001 | (0.06,   | (0.31,   | (0.80,  | <0.001 | (3.41,   | (4.47,   | (-0.45, | 0.616  | (0.00,   | (0.00,   | (-0.23, | 0.250  |

|                  |         |         |         |        |         |         |         |        |         |         |         |        |         |         |         |        |
|------------------|---------|---------|---------|--------|---------|---------|---------|--------|---------|---------|---------|--------|---------|---------|---------|--------|
|                  | 7.16)   | 7.25)   | 1.09)   |        | 2.63)   | 1.83)   | 0.93)   |        | 9.66)   | 8.17)   | 0.77)   |        | 1.76)   | 0.80)   | 0.90)   |        |
|                  | 2.89    | 4.28    | 1.39    |        | 0.31    | 0.43    | 1.11    |        | 9.96    | 15.81   | 1.60    |        | 0.17    | 0.26    | 1.45    |        |
| Pakistan         | (2.65,  | (4.09,  | (1.30,  | <0.001 | (0.24,  | (0.37,  | (0.91,  | <0.001 | (9.49,  | (15.44, | (1.45,  | <0.001 | (0.11,  | (0.22,  | (1.17,  | <0.001 |
|                  | 3.15)   | 4.48)   | 1.47)   |        | 0.41)   | 0.49)   | 1.31)   |        | 10.44)  | 16.20)  | 1.75)   |        | 0.24)   | 0.32)   | 1.74)   |        |
|                  | 6.18    | 7.37    | 0.64    |        | 0.86    | 0.98    | 0.44    |        | 13.38   | 12.18   | -0.34   |        | 0.23    | 0.21    | -0.39   |        |
| Palau            | (0.00,  | (0.00,  | (0.54,  | <0.001 | (0.00,  | (0.00,  | (0.36,  | <0.001 | (0.01,  | (0.00,  | (-0.42, | <0.001 | (0.00,  | (0.00,  | (-0.67, | 0.006  |
|                  | 132.77) | 183.87) | 0.75)   |        | 122.51) | 172.04) | 0.53)   |        | 146.28) | 192.31) | -0.25)  |        | 121.27) | 170.59) | -0.11)  |        |
|                  | 3.93    | 5.18    | 0.96    |        | 0.48    | 0.60    | 0.76    |        | 2.57    | 1.78    | -1.25   |        | 0.04    | 0.03    | -1.14   |        |
| Palestine        | (2.09,  | (3.84,  | (0.92,  | <0.001 | (0.04,  | (0.21,  | (0.71,  | <0.001 | (1.15,  | (1.04,  | (-1.45, | <0.001 | (0.00,  | (0.00,  | (-4.53, | 0.522  |
|                  | 6.91)   | 6.86)   | 1.00)   |        | 2.28)   | 1.37)   | 0.82)   |        | 5.17)   | 2.87)   | -1.05)  |        | 1.60)   | 0.52)   | 2.38)   |        |
|                  | 4.18    | 6.58    | 1.56    |        | 0.68    | 0.94    | 1.14    |        | 12.36   | 15.90   | 0.93    |        | 0.20    | 0.26    | 1.11    |        |
| Panama           | (2.55,  | (4.91,  | (1.53,  | <0.001 | (0.16,  | (0.39,  | (1.05,  | <0.001 | (9.47,  | (13.23, | (0.22,  | 0.010  | (0.00,  | (0.03,  | (0.36,  | 0.004  |
|                  | 6.52)   | 8.65)   | 1.59)   |        | 1.98)   | 1.90)   | 1.22)   |        | 15.92)  | 18.95)  | 1.64)   |        | 1.26)   | 0.93)   | 1.87)   |        |
|                  | 4.58    | 6.08    | 1.00    |        | 0.50    | 0.63    | 0.79    |        | 16.02   | 26.46   | 1.69    |        | 0.27    | 0.45    | 1.71    |        |
| Papua New Guinea | (3.19,  | (5.04,  | (0.94,  | <0.001 | (0.13,  | (0.33,  | (0.65,  | <0.001 | (13.25, | (24.23, | (1.36,  | <0.001 | (0.03,  | (0.20,  | (1.36,  | <0.001 |
|                  | 6.42)   | 7.27)   | 1.07)   |        | 1.38)   | 1.09)   | 0.93)   |        | 19.24)  | 28.84)  | 2.02)   |        | 1.07)   | 0.87)   | 2.07)   |        |
|                  | 4.28    | 6.77    | 1.60    |        | 0.96    | 1.35    | 1.19    |        | 15.41   | 19.34   | 0.92    |        | 0.26    | 0.33    | 0.97    |        |
| Paraguay         | (2.93,  | (5.50,  | (1.53,  | <0.001 | (0.40,  | (0.82,  | (1.12,  | <0.001 | (12.71, | (17.13, | (0.31,  | 0.003  | (0.03,  | (0.10,  | (0.29,  | 0.005  |
|                  | 6.08)   | 8.26)   | 1.67)   |        | 1.98)   | 2.10)   | 1.25)   |        | 18.53)  | 21.75)  | 1.53)   |        | 1.02)   | 0.79)   | 1.67)   |        |
|                  | 3.38    | 5.82    | 1.90    |        | 0.51    | 0.88    | 1.92    |        | 16.99   | 8.75    | -2.16   |        | 0.29    | 0.15    | -2.24   |        |
| Peru             | (2.84,  | (5.26,  | (1.85,  | <0.001 | (0.33,  | (0.67,  | (1.83,  | <0.001 | (15.77, | (8.06,  | (-3.13, | <0.001 | (0.15,  | (0.07,  | (-3.59, | 0.001  |
|                  | 3.99)   | 6.42)   | 1.94)   |        | 0.78)   | 1.13)   | 2.02)   |        | 18.29)  | 9.49)   | -1.19)  |        | 0.51)   | 0.27)   | -0.87)  |        |
|                  | 4.12    | 8.03    | 2.32    |        | 1.04    | 1.39    | 1.01    |        | 8.45    | 41.39   | 5.75    |        | 0.14    | 0.69    | 5.67    |        |
| Philippines      | (3.77,  | (7.66,  | (2.17,  | <0.001 | (0.87,  | (1.24,  | (0.94,  | <0.001 | (7.94,  | (40.54, | (5.01,  | <0.001 | (0.08,  | (0.59,  | (4.77,  | <0.001 |
|                  | 4.50)   | 8.41)   | 2.46)   |        | 1.24)   | 1.55)   | 1.08)   |        | 8.99)   | 42.25)  | 6.50)   |        | 0.23)   | 0.81)   | 6.57)   |        |
|                  | 4.54    | 4.53    | -0.00   |        | 0.67    | 0.66    | -0.03   |        | 3.67    | 3.96    | 0.30    |        | 0.06    | 0.07    | 0.54    |        |
| Poland           | (4.06,  | (4.01,  | (-0.08, | 0.986  | (0.49,  | (0.47,  | (-0.17, | 0.620  | (3.24,  | (3.48,  | (-0.15, | 0.197  | (0.02,  | (0.02,  | (-0.52, | 0.319  |
|                  | 5.07)   | 5.10)   | 0.08)   |        | 0.90)   | 0.91)   | 0.10)   |        | 4.15)   | 4.50)   | 0.75)   |        | 0.16)   | 0.19)   | 1.61)   |        |
|                  | 5.42    | 8.30    | 1.49    |        | 1.49    | 1.42    | -0.16   |        | 7.04    | 6.94    | 0.02    |        | 0.11    | 0.12    | 0.21    |        |
| Portugal         | (4.43,  | (6.92,  | (1.45,  | <0.001 | (0.99,  | (0.89,  | (-0.21, | <0.001 | (5.90,  | (5.70,  | (-0.82, | 0.964  | (0.02,  | (0.01,  | (-0.82, | 0.693  |
|                  | 6.58)   | 9.88)   | 1.52)   |        | 2.15)   | 2.19)   | -0.11)  |        | 8.35)   | 8.39)   | 0.86)   |        | 0.40)   | 0.48)   | 1.25)   |        |
|                  | 5.64    | 9.43    | 1.78    |        | 1.20    | 1.53    | 0.84    |        | 13.06   | 11.25   | -0.78   |        | 0.22    | 0.19    | -0.76   |        |
| Puerto Rico      | (4.05,  | (7.10,  | (1.75,  | <0.001 | (0.54,  | (0.69,  | (0.78,  | <0.001 | (10.57, | (8.70,  | (-1.44, | 0.023  | (0.02,  | (0.01,  | (-1.49, | 0.044  |

|                    |        |        |         |        |        |        |         |        |         |         |         |        |        |        |         |        |
|--------------------|--------|--------|---------|--------|--------|--------|---------|--------|---------|---------|---------|--------|--------|--------|---------|--------|
|                    | 7.65)  | 12.31) | 1.82)   |        | 2.31)  | 2.95)  | 0.91)   |        | 15.98)  | 14.34)  | -0.11)  |        | 0.91)  | 1.04)  | -0.02)  |        |
|                    | 4.24)  | 5.43)  | 0.86)   |        | 0.61)  | 0.68)  | 0.36)   |        | 2.82)   | 1.78)   | -1.44)  |        | 0.05)  | 0.03)  | -1.95)  |        |
| Qatar              | (0.81, | (3.20, | (0.82,  | <0.001 | (0.00, | (0.10, | (0.29,  | <0.001 | (0.31,  | (0.65,  | (-3.11, | 0.098  | (0.00, | (0.00, | (-2.50, | <0.001 |
|                    | 13.76) | 8.98)  | 0.90)   |        | 8.09)  | 2.88)  | 0.44)   |        | 11.62)  | 4.35)   | 0.27)   |        | 7.12)  | 1.94)  | -1.41)  |        |
|                    | 5.04)  | 4.82)  | -0.18)  |        | 1.98)  | 1.70)  | -0.54)  |        | 20.49)  | 3.76)   | -5.63)  |        | 0.34)  | 0.06)  | -6.09)  |        |
| Republic of Korea  | (4.62, | (4.35, | (-0.31, | 0.005  | (1.72, | (1.42, | (-0.62, | <0.001 | (19.62, | (3.35,  | (-6.37, | <0.001 | (0.23, | (0.02, | (-6.89, | <0.001 |
|                    | 5.50)  | 5.32)  | -0.06)  |        | 2.28)  | 2.01)  | -0.47)  |        | 21.38)  | 4.21)   | -4.89)  |        | 0.47)  | 0.15)  | -5.29)  |        |
| Republic of        | 4.44)  | 5.96)  | 1.03)   |        | 0.49)  | 0.63)  | 0.91)   |        | 5.16)   | 6.69)   | 0.71)   |        | 0.08)  | 0.11)  | 0.80)   |        |
| Moldova            | (3.17, | (4.22, | (0.97,  | <0.001 | (0.14, | (0.17, | (0.78,  | <0.001 | (3.77,  | (4.83,  | (-0.02, | 0.058  | (0.00, | (0.00, | (-0.02, | 0.056  |
|                    | 6.08)  | 8.28)  | 1.10)   |        | 1.26)  | 1.78)  | 1.04)   |        | 6.92)   | 9.12)   | 1.44)   |        | 0.65)  | 1.02)  | 1.64)   |        |
|                    | 4.31)  | 5.41)  | 0.78)   |        | 0.41)  | 0.50)  | 0.66)   |        | 2.21)   | 4.64)   | 2.86)   |        | 0.04)  | 0.08)  | 2.29)   |        |
| Romania            | (3.71, | (4.58, | (0.74,  | <0.001 | (0.24, | (0.27, | (0.47,  | <0.001 | (1.78,  | (3.86,  | (2.48,  | <0.001 | (0.00, | (0.01, | (0.02,  | 0.048  |
|                    | 4.99)  | 6.36)  | 0.82)   |        | 0.66)  | 0.85)  | 0.86)   |        | 2.73)   | 5.55)   | 3.25)   |        | 0.17)  | 0.29)  | 4.61)   |        |
|                    | 4.89)  | 9.88)  | 2.42)   |        | 0.56)  | 0.96)  | 1.86)   |        | 8.20)   | 23.97)  | 3.81)   |        | 0.13)  | 0.40)  | 4.01)   |        |
| Russian Federation | (4.63, | (9.49, | (2.09,  | <0.001 | (0.48, | (0.84, | (1.72,  | <0.001 | (7.87,  | (23.35, | (2.46,  | <0.001 | (0.09, | (0.33, | (2.49,  | <0.001 |
|                    | 5.15)  | 10.29) | 2.75)   |        | 0.66)  | 1.10)  | 2.01)   |        | 8.54)   | 24.61)  | 5.17)   |        | 0.18)  | 0.49)  | 5.56)   |        |
|                    | 4.04)  | 3.46)  | -0.49)  |        | 0.81)  | 0.86)  | 0.22)   |        | 32.98)  | 17.45)  | -2.23)  |        | 0.55)  | 0.29)  | -2.21)  |        |
| Rwanda             | (3.03, | (2.80, | (-0.67, | <0.001 | (0.40, | (0.55, | (0.10,  | <0.001 | (29.93, | (15.88, | (-2.48, | <0.001 | (0.22, | (0.12, | (-2.71, | <0.001 |
|                    | 5.31)  | 4.25)  | -0.31)  |        | 1.49)  | 1.30)  | 0.34)   |        | 36.29)  | 19.12)  | -1.98)  |        | 1.17)  | 0.59)  | -1.71)  |        |
| Saint Kitts and    | 6.26)  | 9.16)  | 1.33)   |        | 0.93)  | 1.20)  | 0.86)   |        | 34.28)  | 12.67)  | -3.46)  |        | 0.58)  | 0.21)  | -3.47)  |        |
| Nevis              | (0.01, | (0.27, | (1.26,  | <0.001 | (0.00, | (0.00, | (0.79,  | <0.001 | (6.73,  | (0.83,  | (-3.91, | <0.001 | (0.00, | (0.00, | (-4.06, | <0.001 |
|                    | 61.83) | 52.53) | 1.40)   |        | 52.26) | 38.62) | 0.93)   |        | 106.37) | 58.41)  | -3.00)  |        | 51.64) | 36.75) | -2.88)  |        |
|                    | 7.04)  | 12.16) | 1.88)   |        | 1.53)  | 1.97)  | 0.87)   |        | 34.83)  | 37.48)  | 0.27)   |        | 0.59)  | 0.63)  | 0.26)   |        |
| Saint Lucia        | (0.75, | (3.42, | (1.81,  | <0.001 | (0.00, | (0.01, | (0.81,  | <0.001 | (15.96, | (19.87, | (-0.41, | 0.434  | (0.00, | (0.00, | (-0.46, | 0.486  |
|                    | 29.50) | 31.47) | 1.95)   |        | 20.70) | 15.83) | 0.93)   |        | 67.94)  | 64.94)  | 0.96)   |        | 19.18) | 13.42) | 0.98)   |        |
|                    | 5.16)  | 8.88)  | 1.89)   |        | 0.72)  | 1.03)  | 1.24)   |        | 12.98)  | 18.93)  | 1.42)   |        | 0.21)  | 0.31)  | 1.51)   |        |
| Saint Vincent and  | (0.16, | (0.94, | (1.84,  | <0.001 | (0.00, | (0.00, | (1.19,  | <0.001 | (2.40,  | (5.08,  | (0.73,  | <0.001 | (0.00, | (0.00, | (0.77,  | <0.001 |
| the Grenadines     | 32.20) | 33.98) | 1.94)   |        | 25.03) | 20.39) | 1.30)   |        | 43.86)  | 49.15)  | 2.12)   |        | 24.20) | 18.97) | 2.25)   |        |
|                    | 7.15)  | 11.57) | 1.68)   |        | 1.20)  | 1.55)  | 0.89)   |        | 33.59)  | 56.62)  | 1.82)   |        | 0.58)  | 0.97)  | 1.81)   |        |
| Samoa              | (0.85, | (3.36, | (1.64,  | <0.001 | (0.00, | (0.00, | (0.74,  | <0.001 | (15.17, | (34.92, | (1.76,  | <0.001 | (0.00, | (0.00, | (1.70,  | <0.001 |
|                    | 28.60) | 29.62) | 1.73)   |        | 19.16) | 14.32) | 1.04)   |        | 65.74)  | 87.42)  | 1.87)   |        | 18.17) | 13.38) | 1.91)   |        |
|                    | 5.65)  | 6.64)  | 0.56)   |        | 1.88)  | 1.55)  | -0.66)  |        | 6.21)   | 6.68)   | 0.25)   |        | 0.10)  | 0.11)  | 0.33)   |        |
| San Marino         | (0.00, | (0.00, | (0.54,  | <0.001 | (0.00, | (0.00, | (-0.74, | <0.001 | (0.00,  | (0.00,  | (0.13,  | <0.001 | (0.00, | (0.00, | (-0.06, | 0.099  |

|                       |         |        |        |        |        |        |         |        |         |         |         |        |        |        |         |        |
|-----------------------|---------|--------|--------|--------|--------|--------|---------|--------|---------|---------|---------|--------|--------|--------|---------|--------|
|                       | 103.97) | 91.08) | 0.57)  |        | 96.86) | 81.89) | -0.59)  |        | 105.01) | 91.05)  | 0.38)   |        | 93.49) | 79.17) | 0.72)   |        |
| Sao Tome and Principe | 3.13    | 4.26   | 1.07   |        | 0.73   | 0.90   | 0.73    |        | 14.38   | 14.73   | 0.10    |        | 0.25   | 0.25   | 0.06    |        |
|                       | (0.01,  | (0.43, | (1.04, | <0.001 | (0.00, | (0.00, | (0.62,  | <0.001 | (2.55,  | (5.38,  | (-1.78, | 0.917  | (0.00, | (0.00, | (-1.47, | 0.938  |
|                       | 30.43)  | 17.29) | 1.10)  |        | 26.52) | 11.72) | 0.83)   |        | 48.18)  | 32.63)  | 2.02)   |        | 25.76) | 10.55) | 1.62)   |        |
|                       | 4.52    | 7.55   | 1.81   |        | 0.76   | 1.06   | 1.16    |        | 11.43   | 12.08   | 0.11    |        | 0.19   | 0.21   | 0.08    |        |
| Saudi Arabia          | (3.73,  | (6.95, | (1.73, | <0.001 | (0.46, | (0.84, | (1.07,  | <0.001 | (10.14, | (11.33, | (-0.20, | 0.499  | (0.06, | (0.12, | (-0.22, | 0.603  |
|                       | 5.43)   | 8.20)  | 1.88)  |        | 1.20)  | 1.32)  | 1.26)   |        | 12.84)  | 12.87)  | 0.41)   |        | 0.48)  | 0.34)  | 0.37)   |        |
|                       | 3.01    | 3.63   | 0.69   |        | 0.76   | 0.83   | 0.31    |        | 13.25   | 8.92    | -1.36   |        | 0.22   | 0.15   | -1.17   |        |
| Senegal               | (2.16,  | (2.97, | (0.56, | <0.001 | (0.37, | (0.53, | (0.18,  | <0.001 | (11.34, | (7.86,  | (-2.17, | 0.001  | (0.04, | (0.04, | (-1.54, | <0.001 |
|                       | 4.12)   | 4.39)  | 0.83)  |        | 1.43)  | 1.24)  | 0.45)   |        | 15.42)  | 10.08)  | -0.55)  |        | 0.72)  | 0.39)  | -0.79)  |        |
|                       | 3.15    | 5.46   | 1.94   |        | 0.41   | 0.57   | 1.16    |        | 5.95    | 4.27    | -1.04   |        | 0.10   | 0.07   | -1.38   |        |
| Serbia                | (2.36,  | (4.31, | (1.68, | <0.001 | (0.17, | (0.24, | (1.02,  | <0.001 | (4.85,  | (3.27,  | (-1.27, | <0.001 | (0.01, | (0.00, | (-1.58, | <0.001 |
|                       | 4.12)   | 6.85)  | 2.19)  |        | 0.87)  | 1.15)  | 1.31)   |        | 7.24)   | 5.51)   | -0.80)  |        | 0.42)  | 0.44)  | -1.17)  |        |
|                       | 6.96    | 8.09   | 0.50   |        | 1.65   | 1.68   | 0.06    |        | 44.91   | 35.00   | -0.81   |        | 0.75   | 0.58   | -0.80   |        |
| Seychelles            | (0.18,  | (0.51, | (0.41, | <0.001 | (0.00, | (0.00, | (-0.02, | 0.118  | (17.36, | (12.96, | (-1.28, | 0.001  | (0.00, | (0.00, | (-1.38, | 0.006  |
|                       | 46.59)  | 37.87) | 0.59)  |        | 38.10) | 27.02) | 0.14)   |        | 100.22) | 77.14)  | -0.33)  |        | 36.71) | 24.95) | -0.23)  |        |
|                       | 2.73    | 3.39   | 0.79   |        | 0.70   | 0.80   | 0.49    |        | 11.33   | 11.74   | 0.13    |        | 0.19   | 0.20   | 0.18    |        |
| Sierra Leone          | (1.65,  | (2.58, | (0.62, | <0.001 | (0.23, | (0.43, | (0.41,  | <0.001 | (8.95,  | (10.15, | (-0.27, | 0.529  | (0.01, | (0.04, | (-0.33, | 0.490  |
|                       | 4.30)   | 4.40)  | 0.95)  |        | 1.72)  | 1.38)  | 0.57)   |        | 14.19)  | 13.52)  | 0.53)   |        | 0.97)  | 0.59)  | 0.70)   |        |
|                       | 4.11    | 5.46   | 0.98   |        | 1.91   | 1.54   | -0.76   |        | 6.07    | 7.44    | 0.85    |        | 0.10   | 0.12   | 0.53    |        |
| Singapore             | (2.78,  | (4.12, | (0.91, | <0.001 | (1.05, | (0.85, | (-0.87, | <0.001 | (4.42,  | (5.80,  | (-0.01, | 0.052  | (0.00, | (0.01, | (-0.92, | 0.475  |
|                       | 5.91)   | 7.23)  | 1.04)  |        | 3.25)  | 2.71)  | -0.65)  |        | 8.17)   | 9.51)   | 1.72)   |        | 0.81)  | 0.86)  | 2.00)   |        |
|                       | 5.26    | 5.75   | 0.31   |        | 0.64   | 0.64   | 0.01    |        | 5.31    | 4.63    | -0.46   |        | 0.09   | 0.08   | -0.16   |        |
| Slovakia              | (3.95,  | (4.27, | (0.28, | <0.001 | (0.25, | (0.22, | (0.00,  | 0.026  | (3.98,  | (3.32,  | (-1.12, | 0.175  | (0.00, | (0.00, | (-0.83, | 0.636  |
|                       | 6.90)   | 7.65)  | 0.35)  |        | 1.39)  | 1.54)  | 0.02)   |        | 6.95)   | 6.37)   | 0.21)   |        | 0.57)  | 0.75)  | 0.51)   |        |
|                       | 3.78    | 4.19   | 0.35   |        | 0.51   | 0.49   | -0.12   |        | 2.64    | 1.77    | -1.24   |        | 0.04   | 0.03   | -1.00   |        |
| Slovenia              | (2.09,  | (2.16, | (0.22, | <0.001 | (0.06, | (0.03, | (-0.26, | 0.104  | (1.26,  | (0.55,  | (-1.98, | 0.001  | (0.00, | (0.00, | (-1.00, | <0.001 |
|                       | 6.38)   | 7.56)  | 0.49)  |        | 2.00)  | 2.59)  | 0.02)   |        | 4.95)   | 4.49)   | -0.48)  |        | 1.23)  | 1.86)  | -1.00)  |        |
|                       | 6.16    | 8.87   | 1.26   |        | 0.57   | 0.77   | 1.03    |        | 35.56   | 63.93   | 2.05    |        | 0.62   | 1.10   | 2.02    |        |
| Solomon Islands       | (1.47,  | (4.47, | (1.22, | <0.001 | (0.00, | (0.02, | (0.93,  | <0.001 | (21.21, | (50.64, | (1.85,  | <0.001 | (0.00, | (0.06, | (1.77,  | <0.001 |
|                       | 18.25)  | 15.92) | 1.31)  |        | 9.79)  | 4.59)  | 1.13)   |        | 56.66)  | 79.72)  | 2.24)   |        | 9.94)  | 5.17)  | 2.26)   |        |
|                       | 3.03    | 3.23   | 0.25   |        | 0.65   | 0.70   | 0.27    |        | 23.53   | 16.03   | -1.31   |        | 0.40   | 0.27   | -1.30   |        |
| Somalia               | (2.12,  | (2.66, | (0.13, | <0.001 | (0.28, | (0.45, | (0.09,  | 0.003  | (20.84, | (14.72, | (-1.45, | <0.001 | (0.12, | (0.12, | (-1.51, | <0.001 |

|                            |        |        |         |        |        |        |         |        |         |         |         |        |        |        |         |        |
|----------------------------|--------|--------|---------|--------|--------|--------|---------|--------|---------|---------|---------|--------|--------|--------|---------|--------|
|                            | 4.19)  | 3.88)  | 0.37)   |        | 1.31)  | 1.04)  | 0.44)   |        | 26.49)  | 17.43)  | -1.16)  |        | 0.97)  | 0.52)  | -1.09)  |        |
|                            | 6.73)  | 5.23)  | -0.85)  |        | 1.92)  | 1.70)  | -0.42)  |        | 66.53)  | 23.13)  | -3.45)  |        | 1.12)  | 0.39)  | -3.47)  |        |
| South Africa               | (6.17, | (4.83, | (-0.96, | <0.001 | (1.63, | (1.47, | (-0.54, | <0.001 | (64.71, | (22.28, | (-5.13, | <0.001 | (0.90, | (0.29, | (-5.22, | <0.001 |
|                            | 7.33)  | 5.66)  | -0.75)  |        | 2.25)  | 1.95)  | -0.29)  |        | 68.38)  | 24.00)  | -1.73)  |        | 1.39)  | 0.52)  | -1.69)  |        |
|                            | 3.24)  | 3.26)  | 0.08)   |        | 0.88)  | 0.92)  | 0.17)   |        | 19.12)  | 10.20)  | -2.23)  |        | 0.32)  | 0.17)  | -2.27)  |        |
| South Sudan                | (2.23, | (2.45, | (-0.01, | 0.100  | (0.40, | (0.52, | (0.07,  | 0.001  | (16.47, | (8.71,  | (-2.54, | <0.001 | (0.07, | (0.03, | (-2.66, | <0.001 |
|                            | 4.62)  | 4.26)  | 0.17)   |        | 1.76)  | 1.53)  | 0.26)   |        | 22.13)  | 11.89)  | -1.91)  |        | 1.02)  | 0.55)  | -1.87)  |        |
|                            | 5.17)  | 6.41)  | 0.75)   |        | 1.27)  | 1.16)  | -0.32)  |        | 5.42)   | 5.06)   | -0.24)  |        | 0.09)  | 0.08)  | -0.57)  |        |
| Spain                      | (4.66, | (5.80, | (0.72,  | <0.001 | (1.02, | (0.90, | (-0.42, | <0.001 | (4.90,  | (4.52,  | (-0.82, | 0.422  | (0.03, | (0.03, | (-1.21, | 0.080  |
|                            | 5.72)  | 7.06)  | 0.78)   |        | 1.55)  | 1.46)  | -0.22)  |        | 5.99)   | 5.65)   | 0.35)   |        | 0.19)  | 0.20)  | 0.07)   |        |
|                            | 5.84)  | 7.93)  | 1.04)   |        | 1.52)  | 1.72)  | 0.40)   |        | 27.60)  | 30.67)  | 0.52)   |        | 0.46)  | 0.52)  | 0.54)   |        |
| Sri Lanka                  | (5.08, | (7.10, | (0.93,  | <0.001 | (1.15, | (1.35, | (0.29,  | <0.001 | (25.92, | (29.01, | (-0.66, | 0.388  | (0.27, | (0.32, | (-0.43, | 0.277  |
|                            | 6.68)  | 8.84)  | 1.15)   |        | 1.98)  | 2.17)  | 0.51)   |        | 29.37)  | 32.40)  | 1.71)   |        | 0.75)  | 0.79)  | 1.53)   |        |
|                            | 3.61)  | 4.58)  | 0.83)   |        | 0.37)  | 0.47)  | 0.83)   |        | 7.61)   | 4.69)   | -1.64)  |        | 0.13)  | 0.08)  | -1.73)  |        |
| Sudan                      | (3.03, | (4.13, | (0.75,  | <0.001 | (0.20, | (0.34, | (0.76,  | <0.001 | (6.75,  | (4.24,  | (-1.84, | <0.001 | (0.04, | (0.03, | (-1.97, | <0.001 |
|                            | 4.29)  | 5.06)  | 0.92)   |        | 0.64)  | 0.64)  | 0.91)   |        | 8.56)   | 5.17)   | -1.44)  |        | 0.32)  | 0.17)  | -1.49)  |        |
|                            | 4.52)  | 8.06)  | 2.03)   |        | 0.59)  | 0.90)  | 1.54)   |        | 14.49)  | 16.65)  | 0.67)   |        | 0.24)  | 0.28)  | 0.70)   |        |
| Suriname                   | (1.04, | (3.63, | (1.97,  | <0.001 | (0.00, | (0.02, | (1.46,  | <0.001 | (7.16,  | (9.88,  | (-1.14, | 0.469  | (0.00, | (0.00, | (-1.07, | 0.440  |
|                            | 13.41) | 15.49) | 2.08)   |        | 7.36)  | 5.20)  | 1.62)   |        | 26.75)  | 26.35)  | 2.52)   |        | 6.79)  | 4.09)  | 2.51)   |        |
|                            | 6.59)  | 6.83)  | 0.11)   |        | 1.71)  | 1.14)  | -1.37)  |        | 1.91)   | 2.17)   | 0.45)   |        | 0.03)  | 0.04)  | 1.30)   |        |
| Sweden                     | (5.34, | (5.59, | (0.06,  | <0.001 | (1.10, | (0.67, | (-1.54, | <0.001 | (1.27,  | (1.51,  | (-0.61, | 0.407  | (0.00, | (0.00, | (-0.31, | 0.113  |
|                            | 8.07)  | 8.28)  | 0.17)   |        | 2.54)  | 1.84)  | -1.21)  |        | 2.78)   | 3.05)   | 1.51)   |        | 0.35)  | 0.36)  | 2.93)   |        |
|                            | 4.40)  | 4.87)  | 0.35)   |        | 0.92)  | 0.76)  | -0.68)  |        | 2.94)   | 3.59)   | 0.69)   |        | 0.05)  | 0.06)  | 0.65)   |        |
| Switzerland                | (3.33, | (3.77, | (0.25,  | <0.001 | (0.48, | (0.37, | (-0.90, | <0.001 | (2.09,  | (2.69,  | (-0.21, | 0.132  | (0.00, | (0.00, | (-0.26, | 0.161  |
|                            | 5.74)  | 6.23)  | 0.44)   |        | 1.66)  | 1.43)  | -0.47)  |        | 4.07)   | 4.74)   | 1.58)   |        | 0.47)  | 0.48)  | 1.56)   |        |
|                            | 4.05)  | 5.52)  | 1.09)   |        | 0.40)  | 0.53)  | 0.99)   |        | 4.20)   | 2.84)   | -1.27)  |        | 0.07)  | 0.05)  | -0.97)  |        |
| Syrian Arab Republic       | (3.24, | (4.67, | (1.02,  | <0.001 | (0.18, | (0.30, | (0.85,  | <0.001 | (3.39,  | (2.25,  | (-1.74, | <0.001 | (0.00, | (0.00, | (-2.15, | 0.115  |
|                            | 5.03)  | 6.50)  | 1.15)   |        | 0.81)  | 0.92)  | 1.13)   |        | 5.17)   | 3.57)   | -0.80)  |        | 0.35)  | 0.27)  | 0.24)   |        |
|                            | 4.01)  | 4.49)  | 0.39)   |        | 1.72)  | 1.59)  | -0.28)  |        | 3.20)   | 9.63)   | 3.90)   |        | 0.05)  | 0.16)  | 4.09)   |        |
| Taiwan (Province of China) | (3.45, | (3.84, | (0.33,  | <0.001 | (1.36, | (1.22, | (-0.33, | <0.001 | (2.70,  | (8.68,  | (2.93,  | <0.001 | (0.01, | (0.06, | (2.85,  | <0.001 |
|                            | 4.64)  | 5.23)  | 0.44)   |        | 2.15)  | 2.05)  | -0.22)  |        | 3.77)   | 10.67)  | 4.88)   |        | 0.18)  | 0.36)  | 5.35)   |        |
|                            | 2.64)  | 3.23)  | 0.72)   |        | 0.24)  | 0.28)  | 0.54)   |        | 2.89)   | 3.49)   | 0.76)   |        | 0.05)  | 0.06)  | 0.89)   |        |
| Tajikistan                 | (1.72, | (2.48, | (0.65,  | <0.001 | (0.04, | (0.10, | (0.33,  | <0.001 | (1.93,  | (2.71,  | (0.53,  | <0.001 | (0.00, | (0.00, | (-0.30, | 0.143  |

|                     |          |          |         |        |          |          |         |        |          |          |         |        |          |          |         |        |
|---------------------|----------|----------|---------|--------|----------|----------|---------|--------|----------|----------|---------|--------|----------|----------|---------|--------|
|                     | 3.92)    | 4.14)    | 0.78)   |        | 0.88)    | 0.64)    | 0.76)   |        | 4.23)    | 4.42)    | 0.98)   |        | 0.59)    | 0.32)    | 2.08)   |        |
|                     | 8.42)    | 8.93)    | 0.16)   |        | 4.70)    | 4.88)    | 0.13)   |        | 60.49)   | 46.81)   | -0.89)  |        | 1.01)    | 0.77)    | -0.97)  |        |
| Thailand            | (7.93,   | (8.41,   | (-0.14, | 0.292  | (4.34,   | (4.50,   | (0.07,  | <0.001 | (59.14,  | (45.60,  | (-2.15, | 0.168  | (0.85,   | (0.62,   | (-2.25, | 0.144  |
|                     | 8.95)    | 9.47)    | 0.46)   |        | 5.10)    | 5.29)    | 0.19)   |        | 61.85)   | 48.04)   | 0.38)   |        | 1.21)    | 0.95)    | 0.33)   |        |
|                     | 3.58)    | 5.29)    | 1.39)   |        | 0.61)    | 0.81)    | 0.97)   |        | 11.81)   | 20.18)   | 1.97)   |        | 0.20)    | 0.34)    | 1.93)   |        |
| Timor-Leste         | (1.22,   | (2.80,   | (1.30,  | <0.001 | (0.01,   | (0.10,   | (0.88,  | <0.001 | (6.93,   | (14.89,  | (1.18,  | <0.001 | (0.00,   | (0.00,   | (1.15,  | <0.001 |
|                     | 8.44)    | 9.36)    | 1.48)   |        | 4.08)    | 3.36)    | 1.07)   |        | 19.02)   | 26.94)   | 2.76)   |        | 3.40)    | 2.65)    | 2.71)   |        |
|                     | 3.09)    | 3.65)    | 0.64)   |        | 0.74)    | 0.82)    | 0.36)   |        | 17.43)   | 10.16)   | -1.88)  |        | 0.30)    | 0.17)    | -1.95)  |        |
| Togo                | (1.92,   | (2.78,   | (0.53,  | <0.001 | (0.24,   | (0.44,   | (0.23,  | <0.001 | (14.38,  | (8.67,   | (-2.15, | <0.001 | (0.03,   | (0.03,   | (-2.24, | <0.001 |
|                     | 4.79)    | 4.70)    | 0.76)   |        | 1.82)    | 1.40)    | 0.49)   |        | 20.98)   | 11.84)   | -1.62)  |        | 1.19)    | 0.53)    | -1.66)  |        |
|                     | 7.88)    | 12.44)   | 1.58)   |        | 1.16)    | 1.57)    | 1.06)   |        | 47.18)   | 66.25)   | 1.18)   |        | 0.81)    | 1.14)    | 1.19)   |        |
| Tokelau             | (0.00,   | (0.00,   | (1.53,  | <0.001 | (0.00,   | (0.00,   | (0.95,  | <0.001 | (0.00,   | (0.00,   | (1.10,  | <0.001 | (0.00,   | (0.00,   | (1.07,  | <0.001 |
|                     | 1718.09) | 2329.29) | 1.64)   |        | 1706.16) | 2310.73) | 1.17)   |        | 1789.91) | 2416.89) | 1.25)   |        | 1705.59) | 2309.98) | 1.31)   |        |
|                     | )        | )        | )       |        | )        | )        | )       |        | )        | )        | )       |        | )        | )        | )       |        |
|                     | 6.66)    | 8.56)    | 0.89)   |        | 1.90)    | 2.10)    | 0.34)   |        | 19.81)   | 29.52)   | 1.37)   |        | 0.34)    | 0.51)    | 1.40)   |        |
| Tonga               | (0.22,   | (0.72,   | (0.79,  | <0.001 | (0.00,   | (0.00,   | (0.28,  | <0.001 | (4.14,   | (10.20,  | (1.23,  | <0.001 | (0.00,   | (0.00,   | (1.24,  | <0.001 |
|                     | 39.64)   | 36.09)   | 0.99)   |        | 31.89)   | 25.12)   | 0.40)   |        | 60.35)   | 67.18)   | 1.51)   |        | 29.23)   | 22.17)   | 1.55)   |        |
|                     | 5.28)    | 9.05)    | 1.91)   |        | 0.69)    | 1.01)    | 1.34)   |        | 14.20)   | 13.80)   | -0.41)  |        | 0.25)    | 0.24)    | -0.40)  |        |
| Trinidad and Tobago | (2.81,   | (5.74,   | (1.85,  | <0.001 | (0.06,   | (0.18,   | (1.21,  | <0.001 | (9.85,   | (9.71,   | (-0.78, | 0.032  | (0.00,   | (0.00,   | (-0.77, | 0.037  |
|                     | 9.11)    | 13.73)   | 1.96)   |        | 2.86)    | 3.44)    | 1.47)   |        | 19.87)   | 19.21)   | -0.04)  |        | 2.14)    | 2.23)    | -0.02)  |        |
|                     | 3.94)    | 5.44)    | 1.12)   |        | 0.62)    | 0.78)    | 0.81)   |        | 5.57)    | 4.62)    | -0.63)  |        | 0.09)    | 0.08)    | -0.73)  |        |
| Tunisia             | (3.03,   | (4.53,   | (1.09,  | <0.001 | (0.30,   | (0.46,   | (0.75,  | <0.001 | (4.47,   | (3.78,   | (-0.97, | <0.001 | (0.01,   | (0.01,   | (-1.70, | 0.143  |
|                     | 5.06)    | 6.51)    | 1.16)   |        | 1.17)    | 1.26)    | 0.88)   |        | 6.87)    | 5.60)    | -0.29)  |        | 0.44)    | 0.33)    | 0.25)   |        |
|                     | 4.87)    | 5.93)    | 0.64)   |        | 1.35)    | 1.28)    | -0.21)  |        | 9.80)    | 5.54)    | -2.02)  |        | 0.16)    | 0.09)    | -1.82)  |        |
| Turkey              | (4.47,   | (5.57,   | (0.56,  | <0.001 | (1.14,   | (1.12,   | (-0.27, | <0.001 | (9.23,   | (5.20,   | (-2.62, | <0.001 | (0.10,   | (0.05,   | (-2.36, | <0.001 |
|                     | 5.29)    | 6.31)    | 0.71)   |        | 1.59)    | 1.47)    | -0.16)  |        | 10.39)   | 5.91)    | -1.42)  |        | 0.26)    | 0.15)    | -1.28)  |        |
|                     | 2.57)    | 3.25)    | 0.82)   |        | 0.21)    | 0.26)    | 0.74)   |        | 2.42)    | 6.52)    | 3.52)   |        | 0.04)    | 0.11)    | 3.47)   |        |
| Turkmenistan        | (1.55,   | (2.20,   | (0.76,  | <0.001 | (0.02,   | (0.04,   | (0.45,  | <0.001 | (1.43,   | (5.00,   | (2.80,  | <0.001 | (0.00,   | (0.00,   | (2.01,  | <0.001 |
|                     | 4.07)    | 4.63)    | 0.88)   |        | 0.97)    | 0.87)    | 1.03)   |        | 3.89)    | 8.37)    | 4.25)   |        | 0.69)    | 0.62)    | 4.96)   |        |
|                     | 7.84)    | 10.74)   | 1.09)   |        | 1.02)    | 1.28)    | 0.77)   |        | 48.46)   | 66.87)   | 1.12)   |        | 0.83)    | 1.15)    | 1.13)   |        |
| Tuvalu              | (0.00,   | (0.00,   | (1.06,  | <0.001 | (0.00,   | (0.00,   | (0.72,  | <0.001 | (0.99,   | (4.23,   | (0.98,  | <0.001 | (0.00,   | (0.00,   | (0.97,  | <0.001 |
|                     | 219.22)  | 215.85)  | 1.12)   |        | 205.75)  | 198.20)  | 0.81)   |        | 292.56)  | 312.13)  | 1.26)   |        | 205.36)  | 197.99)  | 1.30)   |        |
| Uganda              | 2.73)    | 3.35)    | 0.76)   | <0.001 | 0.79)    | 0.86)    | 0.31)   | <0.001 | 11.75)   | 13.94)   | 0.52)   | 0.007  | 0.20)    | 0.23)    | 0.52)   | 0.099  |

|                    |        |        |         |        |        |        |         |        |         |         |         |        |        |        |         |        |
|--------------------|--------|--------|---------|--------|--------|--------|---------|--------|---------|---------|---------|--------|--------|--------|---------|--------|
|                    | (2.17, | (2.95, | (0.60,  |        | (0.51, | (0.66, | (0.15,  |        | (10.53, | (13.11, | (0.14,  |        | (0.07, | (0.13, | (-0.10, |        |
|                    | 3.41)  | 3.79)  | 0.91)   |        | 1.20)  | 1.09)  | 0.48)   |        | 13.08)  | 14.81)  | 0.89)   |        | 0.47)  | 0.38)  | 1.14)   |        |
|                    | 5.54   | 8.56   | 1.52    |        | 0.58   | 0.82   | 1.20    |        | 6.57    | 14.28   | 2.69    |        | 0.11   | 0.24   | 2.73    |        |
| Ukraine            | (5.08, | (7.89, | (1.33,  | <0.001 | (0.44, | (0.62, | (0.98,  | <0.001 | (6.07,  | (13.41, | (0.73,  | 0.007  | (0.05, | (0.14, | (0.58,  | 0.013  |
|                    | 6.03)  | 9.28)  | 1.70)   |        | 0.76)  | 1.08)  | 1.42)   |        | 7.11)   | 15.20)  | 4.68)   |        | 0.20)  | 0.39)  | 4.93)   |        |
| United Arab        | 4.48   | 5.48   | 0.70    |        | 0.80   | 0.88   | 0.32    |        | 6.78    | 6.00    | -0.50   |        | 0.11   | 0.10   | -0.34   |        |
| Emirates           | (2.39, | (4.13, | (0.67,  | <0.001 | (0.12, | (0.40, | (0.23,  | <0.001 | (4.13,  | (4.56,  | (-0.78, | <0.001 | (0.00, | (0.00, | (-1.23, | 0.467  |
|                    | 7.76)  | 7.21)  | 0.72)   |        | 2.81)  | 1.79)  | 0.40)   |        | 10.60)  | 7.81)   | -0.22)  |        | 1.71)  | 0.72)  | 0.57)   |        |
|                    | 6.45   | 6.13   | -0.17   |        | 0.99   | 0.98   | -0.03   |        | 2.15    | 5.05    | 3.02    |        | 0.03   | 0.09   | 3.23    |        |
| United Kingdom     | (5.97, | (5.68, | (-0.29, | 0.007  | (0.81, | (0.80, | (-0.19, | 0.706  | (1.88,  | (4.65,  | (2.55,  | <0.001 | (0.01, | (0.04, | (2.11,  | <0.001 |
|                    | 6.95)  | 6.62)  | -0.05)  |        | 1.21)  | 1.18)  | 0.13)   |        | 2.45)   | 5.49)   | 3.49)   |        | 0.10)  | 0.16)  | 4.37)   |        |
|                    | 2.94   | 3.41   | 0.56    |        | 0.82   | 0.97   | 0.62    |        | 17.50   | 14.09   | -0.76   |        | 0.29   | 0.23   | -0.80   |        |
| United Republic of | (2.47, | (3.08, | (0.47,  | <0.001 | (0.59, | (0.79, | (0.56,  | <0.001 | (16.32, | (13.39, | (-1.02, | <0.001 | (0.16, | (0.15, | (-1.29, | 0.001  |
| Tanzania           | 3.48)  | 3.77)  | 0.66)   |        | 1.13)  | 1.17)  | 0.67)   |        | 18.76)  | 14.81)  | -0.50)  |        | 0.51)  | 0.35)  | -0.31)  |        |
|                    | 6.14   | 5.03   | -0.67   |        | 3.42   | 3.40   | 0.04    |        | 5.41    | 10.76   | 2.49    |        | 0.09   | 0.18   | 2.40    |        |
| United States of   | (5.93, | (4.84, | (-0.73, | <0.001 | (3.26, | (3.24, | (-0.08, | 0.537  | (5.21,  | (10.49, | (2.07,  | <0.001 | (0.07, | (0.15, | (1.68,  | <0.001 |
| America            | 6.36)  | 5.22)  | -0.62)  |        | 3.58)  | 3.55)  | 0.16)   |        | 5.61)   | 11.03)  | 2.91)   |        | 0.12)  | 0.22)  | 3.12)   |        |
|                    | 6.85   | 11.36  | 1.74    |        | 1.60   | 1.98   | 0.73    |        | 31.31   | 20.15   | -1.47   |        | 0.52   | 0.34   | -1.43   |        |
| United States      | (0.44, | (1.19, | (1.66,  | <0.001 | (0.00, | (0.00, | (0.65,  | <0.001 | (12.04, | (4.51,  | (-1.78, | <0.001 | (0.00, | (0.00, | (-1.96, | <0.001 |
| Virgin Islands     | 31.47) | 45.32) | 1.82)   |        | 22.51) | 29.76) | 0.81)   |        | 67.09)  | 58.63)  | -1.15)  |        | 20.47) | 26.68) | -0.89)  |        |
|                    | 4.31   | 7.84   | 2.09    |        | 1.30   | 1.50   | 0.48    |        | 10.42   | 11.35   | 0.29    |        | 0.18   | 0.19   | 0.30    |        |
| Uruguay            | (2.78, | (5.79, | (2.06,  | <0.001 | (0.54, | (0.69, | (0.39,  | <0.001 | (7.94,  | (8.87,  | (-0.03, | 0.075  | (0.00, | (0.01, | (-0.17, | 0.214  |
|                    | 6.38)  | 10.41) | 2.12)   |        | 2.63)  | 2.85)  | 0.56)   |        | 13.43)  | 14.34)  | 0.60)   |        | 0.99)  | 1.00)  | 0.76)   |        |
|                    | 2.31   | 3.08   | 1.01    |        | 0.21   | 0.27   | 0.92    |        | 2.38    | 5.63    | 3.01    |        | 0.04   | 0.09   | 2.65    |        |
| Uzbekistan         | (1.86, | (2.68, | (0.94,  | <0.001 | (0.09, | (0.16, | (0.75,  | <0.001 | (1.94,  | (5.10,  | (2.40,  | <0.001 | (0.00, | (0.04, | (2.19,  | <0.001 |
|                    | 2.83)  | 3.52)  | 1.09)   |        | 0.41)  | 0.42)  | 1.09)   |        | 2.91)   | 6.22)   | 3.63)   |        | 0.18)  | 0.20)  | 3.12)   |        |
|                    | 6.25   | 8.17   | 0.94    |        | 0.78   | 0.92   | 0.57    |        | 21.76   | 48.96   | 2.77    |        | 0.37   | 0.83   | 2.82    |        |
| Vanuatu            | (0.62, | (2.57, | (0.89,  | <0.001 | (0.00, | (0.00, | (0.41,  | <0.001 | (7.93,  | (32.55, | (2.49,  | <0.001 | (0.00, | (0.00, | (2.30,  | <0.001 |
|                    | 26.20) | 20.08) | 0.98)   |        | 17.27) | 9.12)  | 0.73)   |        | 48.79)  | 71.15)  | 3.06)   |        | 16.57) | 9.01)  | 3.34)   |        |
| Venezuela          | 4.16   | 5.54   | 1.00    |        | 0.47   | 0.62   | 0.98    |        | 8.13    | 7.89    | -0.14   |        | 0.13   | 0.13   | -0.03   |        |
| (Bolivarian        | (3.54, | (4.94, | (0.96,  | <0.001 | (0.28, | (0.43, | (0.86,  | <0.001 | (7.27,  | (7.17,  | (-1.19, | 0.787  | (0.05, | (0.05, | (-1.45, | 0.968  |
| Republic of)       | 4.85)  | 6.20)  | 1.03)   |        | 0.74)  | 0.87)  | 1.10)   |        | 9.07)   | 8.68)   | 0.91)   |        | 0.32)  | 0.27)  | 1.41)   |        |
| Viet Nam           | 4.63   | 6.47   | 1.17    | <0.001 | 1.45   | 1.66   | 0.46    | <0.001 | 16.76   | 19.03   | 0.46    | <0.001 | 0.29   | 0.32   | 0.39    | 0.009  |



|                     |               |               |              |        |               |               |               |        |                |                 |                |        |               |               |                |        |
|---------------------|---------------|---------------|--------------|--------|---------------|---------------|---------------|--------|----------------|-----------------|----------------|--------|---------------|---------------|----------------|--------|
|                     | (4.28, 5.00)  | (6.12, 6.84)  | (1.14, 1.19) |        | (1.26, 1.66)  | (1.49, 1.85)  | (0.39, 0.52)  |        | (16.08, 17.46) | (18.43, 19.64)  | (0.31, 0.60)   |        | (0.20, 0.39)  | (0.25, 0.41)  | (0.10, 0.68)   |        |
|                     | 3.54          | 4.58          | 0.90         |        | 0.35          | 0.45          | 0.87          |        | 3.35           | 3.96            | 0.69           |        | 0.06          | 0.07          | 0.89           |        |
| Yemen               | (2.80, 4.42)  | (4.06, 5.14)  | (0.86, 0.94) | <0.001 | (0.15, 0.71)  | (0.30, 0.65)  | (0.73, 1.02)  | <0.001 | (2.62, 4.22)   | (3.49, 4.49)    | (0.31, 1.08)   | <0.001 | (0.00, 0.30)  | (0.02, 0.17)  | (0.23, 1.55)   | 0.008  |
|                     | 3.04          | 3.32          | 0.32         |        | 0.71          | 0.82          | 0.52          |        | 24.87          | 17.09           | -1.31          |        | 0.42          | 0.29          | -1.28          |        |
| Zambia              | (2.20, 4.16)  | (2.76, 3.97)  | (0.26, 0.37) | <0.001 | (0.34, 1.36)  | (0.56, 1.18)  | (0.42, 0.63)  | <0.001 | (22.27, 27.73) | (15.77, 18.50)  | (-1.61, -1.01) | <0.001 | (0.14, 1.00)  | (0.14, 0.54)  | (-1.59, -0.97) | <0.001 |
|                     | 3.97          | 4.32          | 0.31         |        | 0.49          | 0.49          | 0.03          |        | 6.11           | 9.14            | 1.37           |        | 0.10          | 0.15          | 1.22           |        |
| Zimbabwe            | (3.12, 4.99)  | (3.63, 5.11)  | (0.25, 0.38) | <0.001 | (0.23, 0.95)  | (0.28, 0.81)  | (-0.08, 0.13) | 0.642  | (5.03, 7.37)   | (8.11, 10.27)   | (0.20, 2.55)   | 0.021  | (0.01, 0.42)  | (0.05, 0.37)  | (-0.84, 3.32)  | 0.247  |
| <b>Men</b>          |               |               |              |        |               |               |               |        |                |                 |                |        |               |               |                |        |
|                     | 5.65          | 7.33          | 0.93         |        | 0.56          | 0.72          | 0.93          |        | 9.44           | 10.04           | 0.24           |        | 0.16          | 0.17          | 0.29           |        |
| Afghanistan         | (4.46, 7.11)  | (6.70, 8.01)  | (0.86, 1.00) | <0.001 | (0.24, 1.21)  | (0.53, 0.96)  | (0.81, 1.06)  | <0.001 | (7.82, 11.34)  | (9.28, 10.87)   | (0.06, 0.42)   | 0.008  | (0.02, 0.68)  | (0.08, 0.32)  | (0.05, 0.53)   | 0.018  |
|                     | 4.24          | 5.59          | 0.96         |        | 0.43          | 0.55          | 0.87          |        | 5.98           | 7.20            | 0.70           |        | 0.10          | 0.12          | 0.47           |        |
| Albania             | (2.85, 6.10)  | (3.71, 8.13)  | (0.85, 1.08) | <0.001 | (0.09, 1.31)  | (0.10, 1.74)  | (0.73, 1.02)  | <0.001 | (4.31, 8.11)   | (5.06, 9.98)    | (-0.31, 1.71)  | 0.175  | (0.00, 0.79)  | (0.00, 1.05)  | (-1.05, 2.02)  | 0.545  |
|                     | 6.08          | 7.62          | 0.78         |        | 0.83          | 0.98          | 0.56          |        | 13.76          | 9.36            | -1.27          |        | 0.23          | 0.16          | -1.26          |        |
| Algeria             | (5.40, 6.84)  | (7.05, 8.23)  | (0.76, 0.80) | <0.001 | (0.59, 1.14)  | (0.78, 1.22)  | (0.48, 0.65)  | <0.001 | (12.71, 14.87) | (8.74, 10.03)   | (-1.42, -1.11) | <0.001 | (0.11, 0.43)  | (0.09, 0.27)  | (-1.47, -1.05) | <0.001 |
|                     | 5.52          | 8.21          | 1.39         |        | 0.89          | 1.12          | 0.79          |        | 21.03          | 53.75           | 3.35           |        | 0.36          | 0.91          | 3.30           |        |
| American Samoa      | (0.01, 55.13) | (0.09, 61.83) | (1.33, 1.45) | <0.001 | (0.00, 46.98) | (0.00, 49.72) | (0.69, 0.88)  | <0.001 | (2.53, 80.50)  | (17.53, 129.73) | (2.78, 3.93)   | <0.001 | (0.00, 46.05) | (0.00, 49.43) | (2.72, 3.88)   | <0.001 |
|                     | 6.00          | 7.58          | 0.81         |        | 1.08          | 1.07          | -0.05         |        | 6.51           | 8.39            | 0.91           |        | 0.11          | 0.15          | 1.21           |        |
| Andorra             | (0.07, 48.61) | (0.19, 49.86) | (0.78, 0.84) | <0.001 | (0.00, 40.90) | (0.00, 39.34) | (-0.11, 0.01) | 0.109  | (0.12, 49.19)  | (0.35, 50.60)   | (0.77, 1.04)   | <0.001 | (0.00, 39.33) | (0.00, 37.76) | (0.91, 1.51)   | <0.001 |
|                     | 3.45          | 4.46          | 0.92         |        | 0.67          | 0.83          | 0.76          |        | 20.77          | 20.02           | -0.13          |        | 0.35          | 0.34          | -0.24          |        |
| Angola              | (2.66, 4.40)  | (3.89, 5.09)  | (0.83, 1.02) | <0.001 | (0.36, 1.18)  | (0.60, 1.13)  | (0.58, 0.94)  | <0.001 | (18.75, 22.97) | (18.77, 21.33)  | (-0.94, 0.69)  | 0.752  | (0.13, 0.76)  | (0.19, 0.56)  | (-0.60, 0.12)  | 0.193  |
|                     | 7.57          | 13.04         | 1.86         |        | 1.17          | 1.62          | 1.11          |        | 32.51          | 37.50           | 0.76           |        | 0.55          | 0.63          | 0.68           |        |
| Antigua and Barbuda | (0.14, 48.55) | (1.88, 45.31) | (1.80, 1.93) | <0.001 | (0.00, 37.32) | (0.00, 26.24) | (1.05, 1.17)  | <0.001 | (8.70, 86.61)  | (14.41, 80.30)  | (-0.81, 2.36)  | 0.345  | (0.00, 36.18) | (0.00, 24.37) | (-0.91, 2.30)  | 0.405  |

|            |        |        |        |        |        |        |         |        |         |         |         |        |        |        |         |        |
|------------|--------|--------|--------|--------|--------|--------|---------|--------|---------|---------|---------|--------|--------|--------|---------|--------|
|            | 4.15   | 7.97   | 2.27   |        | 0.74   | 1.06   | 1.28    |        | 14.48   | 20.77   | 1.27    |        | 0.25   | 0.35   | 1.17    |        |
| Argentina  | (3.65, | (7.39, | (2.21, | <0.001 | (0.54, | (0.86, | (1.15,  | <0.001 | (13.53, | (19.82, | (1.09,  | <0.001 | (0.14, | (0.24, | (0.84,  | <0.001 |
|            | 4.70)  | 8.59)  | 2.33)  |        | 0.99)  | 1.31)  | 1.41)   |        | 15.47)  | 21.75)  | 1.45)   |        | 0.41)  | 0.50)  | 1.51)   |        |
|            | 4.06   | 4.94   | 0.70   |        | 0.43   | 0.51   | 0.61    |        | 4.57    | 5.94    | 0.75    |        | 0.08   | 0.10   | 0.63    |        |
| Armenia    | (2.71, | (3.26, | (0.64, | <0.001 | (0.09, | (0.10, | (0.49,  | <0.001 | (3.12,  | (4.12,  | (-0.04, | 0.064  | (0.00, | (0.00, | (-0.48, | 0.266  |
|            | 5.87)  | 7.27)  | 0.76)  |        | 1.29)  | 1.69)  | 0.72)   |        | 6.47)   | 8.38)   | 1.54)   |        | 0.73)  | 1.07)  | 1.76)   |        |
|            | 5.67   | 6.96   | 0.69   |        | 1.12   | 1.03   | -0.30   |        | 7.45    | 10.13   | 1.15    |        | 0.12   | 0.17   | 1.26    |        |
| Australia  | (4.91, | (6.19, | (0.62, | <0.001 | (0.80, | (0.74, | (-0.41, | <0.001 | (6.56,  | (9.21,  | (0.48,  | 0.001  | (0.04, | (0.07, | (0.08,  | 0.036  |
|            | 6.53)  | 7.80)  | 0.75)  |        | 1.54)  | 1.39)  | -0.20)  |        | 8.42)   | 11.13)  | 1.83)   |        | 0.31)  | 0.36)  | 2.46)   |        |
|            | 6.03   | 7.35   | 0.68   |        | 1.03   | 1.00   | -0.12   |        | 7.97    | 6.57    | -0.73   |        | 0.13   | 0.11   | -0.71   |        |
| Austria    | (4.86, | (6.03, | (0.51, | <0.001 | (0.59, | (0.55, | (-0.29, | 0.179  | (6.62,  | (5.34,  | (-1.27, | 0.008  | (0.02, | (0.01, | (-1.31, | 0.021  |
|            | 7.41)  | 8.90)  | 0.85)  |        | 1.71)  | 1.70)  | 0.05)   |        | 9.53)   | 8.03)   | -0.19)  |        | 0.52)  | 0.51)  | -0.11)  |        |
|            | 3.61   | 4.30   | 0.62   |        | 0.31   | 0.37   | 0.62    |        | 5.28    | 5.66    | 0.18    |        | 0.09   | 0.09   | -0.26   |        |
| Azerbaijan | (2.71, | (3.47, | (0.56, | <0.001 | (0.10, | (0.16, | (0.37,  | <0.001 | (4.18,  | (4.71,  | (-0.69, | 0.690  | (0.00, | (0.01, | (-1.66, | 0.722  |
|            | 4.73)  | 5.29)  | 0.67)  |        | 0.79)  | 0.76)  | 0.87)   |        | 6.60)   | 6.78)   | 1.05)   |        | 0.46)  | 0.37)  | 1.17)   |        |
|            | 7.73   | 14.12  | 2.10   |        | 0.87   | 1.38   | 1.62    |        | 47.51   | 57.70   | 0.67    |        | 0.81   | 1.00   | 0.70    |        |
| Bahamas    | (2.21, | (6.89, | (2.03, | <0.001 | (0.00, | (0.04, | (1.50,  | <0.001 | (31.03, | (41.70, | (0.01,  | 0.048  | (0.00, | (0.01, | (0.04,  | 0.038  |
|            | 20.12) | 25.80) | 2.16)  |        | 9.64)  | 7.84)  | 1.74)   |        | 70.17)  | 77.92)  | 1.33)   |        | 9.57)  | 7.18)  | 1.37)   |        |
|            | 6.99   | 8.93   | 0.86   |        | 0.92   | 1.10   | 0.62    |        | 7.00    | 6.06    | -0.51   |        | 0.12   | 0.10   | -0.70   |        |
| Bahrain    | (3.38, | (5.93, | (0.82, | <0.001 | (0.06, | (0.27, | (0.56,  | <0.001 | (3.35,  | (3.65,  | (-0.96, | 0.026  | (0.00, | (0.00, | (-1.31, | 0.023  |
|            | 13.74) | 13.19) | 0.89)  |        | 5.67)  | 3.41)  | 0.69)   |        | 13.81)  | 9.76)   | -0.06)  |        | 4.55)  | 1.99)  | -0.10)  |        |
|            | 3.26   | 4.46   | 1.08   |        | 0.42   | 0.54   | 0.92    |        | 13.90   | 13.83   | -0.02   |        | 0.23   | 0.23   | -0.01   |        |
| Bangladesh | (3.01, | (4.23, | (1.05, | <0.001 | (0.33, | (0.47, | (0.85,  | <0.001 | (13.39, | (13.43, | (-0.55, | 0.955  | (0.17, | (0.18, | (-0.66, | 0.966  |
|            | 3.52)  | 4.69)  | 1.12)  |        | 0.52)  | 0.63)  | 0.99)   |        | 14.43)  | 14.25)  | 0.53)   |        | 0.31)  | 0.29)  | 0.64)   |        |
|            | 10.56  | 15.54  | 1.33   |        | 1.55   | 1.99   | 0.86    |        | 54.16   | 49.14   | -0.44   |        | 0.92   | 0.84   | -0.42   |        |
| Barbados   | (3.74, | (6.61, | (1.23, | <0.001 | (0.02, | (0.05, | (0.77,  | <0.001 | (36.30, | (31.63, | (-0.99, | 0.116  | (0.00, | (0.00, | (-1.16, | 0.272  |
|            | 23.66) | 31.21) | 1.42)  |        | 10.09) | 11.63) | 0.95)   |        | 77.86)  | 73.10)  | 0.11)   |        | 8.98)  | 9.60)  | 0.33)   |        |
|            | 6.40   | 10.85  | 1.83   |        | 0.64   | 1.01   | 1.56    |        | 16.99   | 37.23   | 2.62    |        | 0.29   | 0.65   | 2.69    |        |
| Belarus    | (5.34, | (9.31, | (1.68, | <0.001 | (0.34, | (0.58, | (1.39,  | <0.001 | (15.25, | (34.39, | (1.97,  | <0.001 | (0.11, | (0.32, | (2.03,  | <0.001 |
|            | 7.61)  | 12.63) | 1.99)  |        | 1.11)  | 1.70)  | 1.73)   |        | 18.88)  | 40.28)  | 3.28)   |        | 0.65)  | 1.22)  | 3.35)   |        |
|            | 4.98   | 7.57   | 1.45   |        | 1.14   | 1.23   | 0.26    |        | 3.99    | 6.39    | 1.57    |        | 0.07   | 0.11   | 1.57    |        |
| Belgium    | (4.04, | (6.36, | (1.42, | <0.001 | (0.71, | (0.77, | (0.13,  | <0.001 | (3.15,  | (5.29,  | (1.32,  | <0.001 | (0.00, | (0.01, | (1.21,  | <0.001 |
|            | 6.10)  | 8.97)  | 1.47)  |        | 1.74)  | 1.88)  | 0.39)   |        | 5.00)   | 7.68)   | 1.83)   |        | 0.35)  | 0.43)  | 1.93)   |        |

|                   |        |        |         |        |        |        |         |        |         |         |         |        |        |        |         |        |
|-------------------|--------|--------|---------|--------|--------|--------|---------|--------|---------|---------|---------|--------|--------|--------|---------|--------|
|                   | 5.16   | 8.73   | 1.86    |        | 0.55   | 0.85   | 1.53    |        | 9.08    | 16.75   | 2.00    |        | 0.15   | 0.28   | 1.98    |        |
| Belize            | (0.48, | (3.61, | (1.79,  | <0.001 | (0.00, | (0.01, | (1.41,  | <0.001 | (1.90,  | (9.16,  | (1.42,  | <0.001 | (0.00, | (0.00, | (1.27,  | <0.001 |
|                   | 22.62) | 17.95) | 1.94)   |        | 15.20) | 6.44)  | 1.66)   |        | 28.40)  | 28.31)  | 2.57)   |        | 14.54) | 5.44)  | 2.69)   |        |
|                   | 4.06   | 4.69   | 0.51    |        | 0.70   | 0.78   | 0.37    |        | 20.89   | 16.90   | -0.72   |        | 0.36   | 0.29   | -0.72   |        |
| Benin             | (2.74, | (3.83, | (0.39,  | <0.001 | (0.23, | (0.45, | (0.31,  | <0.001 | (17.63, | (15.18, | (-0.92, | <0.001 | (0.06, | (0.10, | (-0.97, | <0.001 |
|                   | 5.84)  | 5.70)  | 0.62)   |        | 1.68)  | 1.27)  | 0.42)   |        | 24.61)  | 18.77)  | -0.52)  |        | 1.21)  | 0.65)  | -0.47)  |        |
|                   | 8.26   | 13.88  | 1.78    |        | 1.42   | 1.89   | 0.97    |        | 32.93   | 27.83   | -0.41   |        | 0.55   | 0.47   | -0.41   |        |
| Bermuda           | (0.26, | (0.72, | (1.72,  | <0.001 | (0.00, | (0.00, | (0.87,  | <0.001 | (9.48,  | (4.68,  | (-0.55, | <0.001 | (0.00, | (0.00, | (-0.56, | <0.001 |
|                   | 52.93) | 74.68) | 1.84)   |        | 42.21) | 55.48) | 1.06)   |        | 88.74)  | 96.25)  | -0.27)  |        | 40.76) | 53.00) | -0.27)  |        |
|                   | 3.16   | 4.61   | 1.32    |        | 0.33   | 0.46   | 1.19    |        | 8.21    | 9.74    | 0.58    |        | 0.14   | 0.16   | 0.36    |        |
| Bhutan            | (0.86, | (2.06, | (1.21,  | <0.001 | (0.00, | (0.01, | (1.00,  | <0.001 | (3.88,  | (5.79,  | (0.47,  | <0.001 | (0.00, | (0.00, | (-0.11, | 0.136  |
|                   | 8.75)  | 9.03)  | 1.44)   |        | 4.54)  | 3.09)  | 1.39)   |        | 15.67)  | 15.49)  | 0.70)   |        | 4.25)  | 2.57)  | 0.84)   |        |
| Bolivia           | 3.82   | 6.63   | 1.94    |        | 0.44   | 0.70   | 1.64    |        | 15.53   | 14.12   | -0.32   |        | 0.25   | 0.23   | -0.39   |        |
| (Plurinational    | (2.77, | (5.64, | (1.89,  | <0.001 | (0.15, | (0.41, | (1.44,  | <0.001 | (13.36, | (12.66, | (-0.44, | <0.001 | (0.05, | (0.08, | (-0.53, | <0.001 |
| State of)         | 5.17)  | 7.75)  | 1.99)   |        | 1.04)  | 1.13)  | 1.84)   |        | 17.99)  | 15.70)  | -0.21)  |        | 0.79)  | 0.52)  | -0.26)  |        |
|                   | 5.06   | 6.21   | 0.75    |        | 0.50   | 0.60   | 0.66    |        | 5.06    | 4.97    | -0.22   |        | 0.09   | 0.08   | -0.41   |        |
| Bosnia and        | (3.77, | (4.28, | (0.54,  | <0.001 | (0.17, | (0.13, | (0.32,  | <0.001 | (3.77,  | (3.27,  | (-0.78, | 0.456  | (0.00, | (0.00, | (-0.93, | 0.128  |
| Herzegovina       | 6.66)  | 8.77)  | 0.96)   |        | 1.19)  | 1.79)  | 1.00)   |        | 6.66)   | 7.30)   | 0.35)   |        | 0.56)  | 0.99)  | 0.12)   |        |
|                   | 6.48   | 6.56   | 0.01    |        | 1.15   | 1.19   | 0.11    |        | 39.79   | 34.40   | -0.47   |        | 0.66   | 0.57   | -0.49   |        |
| Botswana          | (3.56, | (4.56, | (-0.09, | 0.795  | (0.21, | (0.44, | (-0.03, | 0.129  | (31.90, | (29.56, | (-0.72, | <0.001 | (0.04, | (0.12, | (-0.78, | 0.001  |
|                   | 11.08) | 9.17)  | 0.12)   |        | 3.97)  | 2.58)  | 0.25)   |        | 49.24)  | 39.81)  | -0.23)  |        | 3.29)  | 1.69)  | -0.19)  |        |
|                   | 5.28   | 8.23   | 1.57    |        | 0.64   | 0.95   | 1.36    |        | 28.07   | 24.05   | -0.52   |        | 0.47   | 0.40   | -0.55   |        |
| Brazil            | (5.02, | (7.96, | (1.26,  | <0.001 | (0.55, | (0.86, | (1.23,  | <0.001 | (27.48, | (23.59, | (-0.72, | <0.001 | (0.39, | (0.34, | (-0.88, | 0.002  |
|                   | 5.55)  | 8.51)  | 1.88)   |        | 0.73)  | 1.04)  | 1.49)   |        | 28.68)  | 24.52)  | -0.33)  |        | 0.55)  | 0.47)  | -0.21)  |        |
|                   | 6.16   | 7.37   | 0.62    |        | 1.03   | 1.07   | 0.12    |        | 27.03   | 16.13   | -1.75   |        | 0.45   | 0.28   | -1.60   |        |
| Brunei Darussalam | (1.70, | (3.22, | (0.59,  | <0.001 | (0.01, | (0.04, | (0.05,  | 0.001  | (16.01, | (9.62,  | (-2.21, | <0.001 | (0.00, | (0.00, | (-2.10, | <0.001 |
|                   | 16.13) | 14.85) | 0.65)   |        | 8.26)  | 5.98)  | 0.19)   |        | 43.10)  | 25.78)  | -1.29)  |        | 7.25)  | 4.67)  | -1.10)  |        |
|                   | 4.85   | 7.05   | 1.30    |        | 0.55   | 0.72   | 0.94    |        | 15.76   | 21.56   | 1.05    |        | 0.26   | 0.36   | 1.10    |        |
| Bulgaria          | (3.80, | (5.52, | (1.23,  | <0.001 | (0.24, | (0.29, | (0.87,  | <0.001 | (13.82, | (18.82, | (0.76,  | <0.001 | (0.07, | (0.10, | (0.81,  | <0.001 |
|                   | 6.10)  | 8.93)  | 1.37)   |        | 1.08)  | 1.53)  | 1.01)   |        | 17.89)  | 24.64)  | 1.35)   |        | 0.69)  | 1.04)  | 1.40)   |        |
|                   | 3.64   | 4.37   | 0.69    |        | 0.51   | 0.57   | 0.44    |        | 14.53   | 16.48   | 0.49    |        | 0.25   | 0.28   | 0.54    |        |
| Burkina Faso      | (2.69, | (3.74, | (0.52,  | <0.001 | (0.20, | (0.36, | (0.32,  | <0.001 | (12.46, | (15.17, | (0.08,  | 0.020  | (0.05, | (0.13, | (-0.12, | 0.111  |
|                   | 4.85)  | 5.09)  | 0.87)   |        | 1.11)  | 0.88)  | 0.55)   |        | 16.87)  | 17.87)  | 0.90)   |        | 0.77)  | 0.53)  | 1.21)   |        |

|                             |        |        |         |        |        |        |         |        |         |         |         |        |        |        |         |        |
|-----------------------------|--------|--------|---------|--------|--------|--------|---------|--------|---------|---------|---------|--------|--------|--------|---------|--------|
|                             | 5.66   | 4.83   | -0.53   |        | 0.84   | 0.85   | 0.03    |        | 41.36   | 26.43   | -1.52   |        | 0.69   | 0.44   | -1.60   |        |
| Burundi                     | (4.24, | (3.95, | (-0.63, | <0.001 | (0.36, | (0.50, | (-0.03, | 0.305  | (37.36, | (24.30, | (-1.81, | <0.001 | (0.26, | (0.21, | (-1.97, | <0.001 |
|                             | 7.42)  | 5.86)  | -0.43)  |        | 1.71)  | 1.35)  | 0.10)   |        | 45.70)  | 28.72)  | -1.23)  |        | 1.51)  | 0.84)  | -1.23)  |        |
|                             | 3.86   | 5.17   | 1.03    |        | 0.69   | 0.83   | 0.68    |        | 10.74   | 10.31   | -0.26   |        | 0.18   | 0.17   | -0.39   |        |
| Cabo Verde                  | (0.49, | (2.02, | (0.97,  | <0.001 | (0.00, | (0.03, | (0.58,  | <0.001 | (3.45,  | (5.56,  | (-0.79, | 0.349  | (0.00, | (0.00, | (-1.07, | 0.269  |
|                             | 17.60) | 11.03) | 1.10)   |        | 13.16) | 4.68)  | 0.78)   |        | 27.64)  | 17.64)  | 0.28)   |        | 12.48) | 3.52)  | 0.30)   |        |
|                             | 3.88   | 4.92   | 0.85    |        | 0.60   | 0.74   | 0.77    |        | 18.29   | 19.47   | 0.25    |        | 0.31   | 0.33   | 0.25    |        |
| Cambodia                    | (2.98, | (4.21, | (0.76,  | <0.001 | (0.28, | (0.48, | (0.63,  | <0.001 | (16.23, | (18.05, | (0.14,  | <0.001 | (0.10, | (0.17, | (0.00,  | 0.046  |
|                             | 5.00)  | 5.71)  | 0.94)   |        | 1.15)  | 1.08)  | 0.92)   |        | 20.56)  | 20.98)  | 0.36)   |        | 0.78)  | 0.58)  | 0.49)   |        |
|                             | 3.94   | 4.86   | 0.74    |        | 0.60   | 0.74   | 0.76    |        | 18.67   | 19.26   | 0.11    |        | 0.32   | 0.33   | 0.10    |        |
| Cameroon                    | (3.06, | (4.31, | (0.65,  | <0.001 | (0.29, | (0.53, | (0.60,  | <0.001 | (16.61, | (18.11, | (-0.04, | 0.147  | (0.10, | (0.19, | (-0.20, | 0.517  |
|                             | 5.02)  | 5.47)  | 0.82)   |        | 1.12)  | 1.00)  | 0.91)   |        | 20.94)  | 20.47)  | 0.25)   |        | 0.77)  | 0.53)  | 0.39)   |        |
|                             | 6.16   | 6.79   | 0.35    |        | 3.73   | 2.62   | -1.22   |        | 4.28    | 9.44    | 2.79    |        | 0.07   | 0.16   | 3.06    |        |
| Canada                      | (5.53, | (6.14, | (0.25,  | <0.001 | (3.26, | (2.22, | (-1.26, | <0.001 | (3.77,  | (8.69,  | (2.38,  | <0.001 | (0.02, | (0.08, | (2.22,  | <0.001 |
|                             | 6.85)  | 7.50)  | 0.45)   |        | 4.27)  | 3.06)  | -1.17)  |        | 4.85)   | 10.25)  | 3.20)   |        | 0.19)  | 0.31)  | 3.91)   |        |
|                             | 3.74   | 3.91   | 0.20    |        | 0.52   | 0.52   | 0.01    |        | 23.54   | 22.44   | -0.25   |        | 0.39   | 0.38   | -0.23   |        |
| Central African<br>Republic | (2.21, | (2.75, | (0.08,  | 0.001  | (0.09, | (0.17, | (-0.18, | 0.935  | (19.36, | (19.50, | (-0.55, | 0.094  | (0.04, | (0.09, | (-0.66, | 0.283  |
|                             | 6.03)  | 5.42)  | 0.31)   |        | 1.85)  | 1.26)  | 0.20)   |        | 28.44)  | 25.74)  | 0.04)   |        | 1.66)  | 1.08)  | 0.19)   |        |
|                             | 3.69   | 4.21   | 0.53    |        | 0.51   | 0.57   | 0.38    |        | 16.38   | 14.89   | -0.23   |        | 0.28   | 0.25   | -0.23   |        |
| Chad                        | (2.56, | (3.45, | (0.43,  | <0.001 | (0.16, | (0.31, | (0.27,  | <0.001 | (13.81, | (13.37, | (-0.48, | 0.077  | (0.04, | (0.09, | (-0.63, | 0.258  |
|                             | 5.18)  | 5.10)  | 0.62)   |        | 1.29)  | 0.98)  | 0.48)   |        | 19.33)  | 16.56)  | 0.03)   |        | 0.96)  | 0.58)  | 0.17)   |        |
|                             | 4.54   | 8.64   | 2.23    |        | 0.75   | 1.21   | 1.67    |        | 8.99    | 13.03   | 1.33    |        | 0.15   | 0.22   | 1.31    |        |
| Chile                       | (3.78, | (7.69, | (2.18,  | <0.001 | (0.46, | (0.87, | (1.51,  | <0.001 | (7.90,  | (11.86, | (0.81,  | <0.001 | (0.04, | (0.09, | (0.54,  | 0.001  |
|                             | 5.41)  | 9.68)  | 2.29)   |        | 1.14)  | 1.65)  | 1.84)   |        | 10.20)  | 14.28)  | 1.85)   |        | 0.40)  | 0.45)  | 2.08)   |        |
|                             | 7.79   | 5.80   | -0.99   |        | 0.87   | 0.84   | -0.10   |        | 10.68   | 5.47    | -2.27   |        | 0.18   | 0.09   | -2.24   |        |
| China                       | (7.69, | (5.71, | (-1.14, | <0.001 | (0.83, | (0.81, | (-0.30, | 0.345  | (10.56, | (5.38,  | (-2.70, | <0.001 | (0.16, | (0.08, | (-3.36, | <0.001 |
|                             | 7.90)  | 5.89)  | -0.83)  |        | 0.90)  | 0.88)  | 0.11)   |        | 10.80)  | 5.56)   | -1.83)  |        | 0.19)  | 0.10)  | -1.10)  |        |
|                             | 4.99   | 7.86   | 1.59    |        | 0.75   | 1.10   | 1.34    |        | 18.16   | 22.17   | 0.73    |        | 0.30   | 0.37   | 0.69    |        |
| Colombia                    | (4.46, | (7.31, | (1.48,  | <0.001 | (0.56, | (0.90, | (1.28,  | <0.001 | (17.14, | (21.24, | (0.12,  | 0.019  | (0.18, | (0.26, | (0.29,  | 0.001  |
|                             | 5.57)  | 8.45)  | 1.70)   |        | 0.99)  | 1.34)  | 1.40)   |        | 19.22)  | 23.14)  | 1.35)   |        | 0.47)  | 0.52)  | 1.09)   |        |
|                             | 5.39   | 5.64   | 0.18    |        | 1.10   | 1.20   | 0.31    |        | 30.57   | 23.46   | -0.95   |        | 0.52   | 0.40   | -0.96   |        |
| Comoros                     | (1.46, | (2.47, | (0.08,  | <0.001 | (0.01, | (0.11, | (0.22,  | <0.001 | (19.11, | (16.22, | (-3.47, | 0.468  | (0.00, | (0.00, | (-3.33, | 0.433  |
|                             | 14.84) | 11.15) | 0.28)   |        | 8.49)  | 4.88)  | 0.40)   |        | 47.00)  | 32.91)  | 1.64)   |        | 7.58)  | 3.56)  | 1.46)   |        |

|                   |         |         |         |        |         |         |         |        |         |         |         |        |         |         |         |        |
|-------------------|---------|---------|---------|--------|---------|---------|---------|--------|---------|---------|---------|--------|---------|---------|---------|--------|
|                   | 4.66    | 4.53    | -0.10   |        | 0.83    | 0.87    | 0.15    |        | 29.86   | 19.49   | -1.54   |        | 0.50    | 0.33    | -1.51   |        |
| Congo             | (2.83,  | (3.31,  | (-0.15, | <0.001 | (0.20,  | (0.39,  | (0.07,  | <0.001 | (24.79, | (16.84, | (-2.25, | <0.001 | (0.06,  | (0.07,  | (-2.35, | 0.001  |
|                   | 7.36)   | 6.05)   | -0.05)  |        | 2.43)   | 1.67)   | 0.23)   |        | 35.75)  | 22.43)  | -0.83)  |        | 1.98)   | 0.93)   | -0.66)  |        |
|                   | 6.22    | 7.34    | 0.56    |        | 0.93    | 1.06    | 0.43    |        | 27.73   | 27.45   | -0.02   |        | 0.46    | 0.46    | 0.00    |        |
| Cook Islands      | (0.00,  | (0.00,  | (0.51,  | <0.001 | (0.00,  | (0.00,  | (0.35,  | <0.001 | (0.87,  | (0.22,  | (-0.12, | 0.661  | (0.00,  | (0.00,  | (-0.21, | 0.990  |
|                   | 132.08) | 158.27) | 0.61)   |        | 122.75) | 145.95) | 0.52)   |        | 167.36) | 195.45) | 0.08)   |        | 121.98) | 144.78) | 0.21)   |        |
|                   | 6.34    | 12.02   | 2.23    |        | 0.81    | 1.38    | 1.85    |        | 18.39   | 28.99   | 1.55    |        | 0.31    | 0.49    | 1.58    |        |
| Costa Rica        | (4.50,  | (9.91,  | (2.18,  | <0.001 | (0.27,  | (0.73,  | (1.77,  | <0.001 | (15.14, | (25.67, | (0.89,  | <0.001 | (0.03,  | (0.15,  | (0.96,  | <0.001 |
|                   | 8.72)   | 14.46)  | 2.27)   |        | 1.94)   | 2.38)   | 1.93)   |        | 22.16)  | 32.65)  | 2.22)   |        | 1.24)   | 1.22)   | 2.21)   |        |
|                   | 4.16    | 4.61    | 0.42    |        | 0.67    | 0.71    | 0.23    |        | 20.99   | 17.24   | -0.65   |        | 0.35    | 0.29    | -0.65   |        |
| Cote d'Ivoire     | (3.37,  | (4.06,  | (0.31,  | <0.001 | (0.38,  | (0.51,  | (0.08,  | 0.002  | (19.13, | (16.13, | (-0.89, | <0.001 | (0.15,  | (0.16,  | (-1.08, | 0.004  |
|                   | 5.09)   | 5.22)   | 0.53)   |        | 1.11)   | 0.98)   | 0.37)   |        | 22.99)  | 18.40)  | -0.41)  |        | 0.72)   | 0.48)   | -0.21)  |        |
|                   | 5.12    | 5.88    | 0.47    |        | 0.58    | 0.61    | 0.18    |        | 5.51    | 6.43    | 0.45    |        | 0.09    | 0.11    | 0.71    |        |
| Croatia           | (3.77,  | (4.19,  | (0.39,  | <0.001 | (0.20,  | (0.17,  | (-0.08, | 0.170  | (4.12,  | (4.68,  | (-0.10, | 0.107  | (0.00,  | (0.00,  | (-0.06, | 0.071  |
|                   | 6.81)   | 8.09)   | 0.55)   |        | 1.34)   | 1.66)   | 0.43)   |        | 7.25)   | 8.70)   | 0.99)   |        | 0.63)   | 0.92)   | 1.49)   |        |
|                   | 6.19    | 10.04   | 1.70    |        | 0.77    | 1.09    | 1.23    |        | 12.58   | 13.00   | 0.07    |        | 0.21    | 0.22    | 0.07    |        |
| Cuba              | (5.21,  | (8.66,  | (1.63,  | <0.001 | (0.46,  | (0.67,  | (1.17,  | <0.001 | (11.17, | (11.43, | (-0.50, | 0.816  | (0.07,  | (0.06,  | (-0.05, | 0.254  |
|                   | 7.30)   | 11.58)  | 1.77)   |        | 1.23)   | 1.69)   | 1.29)   |        | 14.12)  | 14.73)  | 0.64)   |        | 0.52)   | 0.57)   | 0.18)   |        |
|                   | 4.65    | 6.48    | 1.13    |        | 0.99    | 1.04    | 0.15    |        | 12.03   | 11.27   | -0.15   |        | 0.20    | 0.19    | -0.19   |        |
| Cyprus            | (1.93,  | (3.75,  | (1.09,  | <0.001 | (0.08,  | (0.17,  | (0.05,  | 0.006  | (7.25,  | (7.55,  | (-0.58, | 0.490  | (0.00,  | (0.00,  | (-0.64, | 0.403  |
|                   | 9.52)   | 10.87)  | 1.18)   |        | 4.28)   | 3.91)   | 0.26)   |        | 18.86)  | 16.58)  | 0.28)   |        | 2.94)   | 2.67)   | 0.26)   |        |
|                   | 6.42    | 8.31    | 0.88    |        | 0.93    | 1.02    | 0.31    |        | 12.07   | 14.50   | 0.71    |        | 0.20    | 0.25    | 0.73    |        |
| Czechia           | (5.33,  | (6.95,  | (0.78,  | <0.001 | (0.54,  | (0.58,  | (0.13,  | 0.001  | (10.55, | (12.73, | (0.19,  | 0.008  | (0.05,  | (0.07,  | (0.06,  | 0.034  |
|                   | 7.68)   | 9.89)   | 0.99)   |        | 1.48)   | 1.69)   | 0.49)   |        | 13.75)  | 16.48)  | 1.23)   |        | 0.55)   | 0.69)   | 1.40)   |        |
| Democratic        | 4.89    | 5.03    | 0.12    |        | 0.60    | 0.60    | 0.01    |        | 12.38   | 10.14   | -0.69   |        | 0.20    | 0.17    | -0.60   |        |
| People's Republic | (4.22,  | (4.44,  | (0.04,  | 0.002  | (0.38,  | (0.41,  | (-0.08, | 0.784  | (11.30, | (9.30,  | (-0.77, | <0.001 | (0.09,  | (0.08,  | (-0.79, | <0.001 |
| of Korea          | 5.65)   | 5.67)   | 0.19)   |        | 0.90)   | 0.86)   | 0.10)   |        | 13.54)  | 11.04)  | -0.61)  |        | 0.41)   | 0.33)   | -0.41)  |        |
| Democratic        | 3.47    | 4.03    | 0.56    |        | 0.67    | 0.71    | 0.23    |        | 19.15   | 17.92   | -0.25   |        | 0.33    | 0.30    | -0.36   |        |
| Republic of the   | (3.04,  | (3.74,  | (0.41,  | <0.001 | (0.48,  | (0.59,  | (0.18,  | <0.001 | (18.09, | (17.27, | (-0.43, | 0.005  | (0.20,  | (0.22,  | (-0.64, | 0.010  |
| Congo             | 3.96)   | 4.35)   | 0.72)   |        | 0.90)   | 0.85)   | 0.28)   |        | 20.27)  | 18.59)  | -0.08)  |        | 0.51)   | 0.41)   | -0.09)  |        |
|                   | 5.52    | 8.98    | 1.69    |        | 0.74    | 0.93    | 0.80    |        | 4.56    | 5.37    | 0.56    |        | 0.08    | 0.09    | 0.41    |        |
| Denmark           | (4.16,  | (7.15,  | (1.64,  | <0.001 | (0.31,  | (0.42,  | (0.64,  | <0.001 | (3.34,  | (3.99,  | (0.16,  | 0.006  | (0.00,  | (0.00,  | (-0.12, | 0.128  |
|                   | 7.22)   | 11.15)  | 1.75)   |        | 1.53)   | 1.83)   | 0.95)   |        | 6.11)   | 7.10)   | 0.96)   |        | 0.57)   | 0.63)   | 0.93)   |        |

|                       |        |        |         |        |        |        |        |        |         |         |         |        |        |        |         |        |
|-----------------------|--------|--------|---------|--------|--------|--------|--------|--------|---------|---------|---------|--------|--------|--------|---------|--------|
|                       | 5.43   | 6.02   | 0.36    |        | 1.14   | 1.29   | 0.42   |        | 32.58   | 28.83   | -0.33   |        | 0.55   | 0.48   | -0.32   |        |
| Djibouti              | (1.86, | (3.42, | (0.32,  | <0.001 | (0.04, | (0.30, | (0.34, | <0.001 | (22.21, | (22.69, | (-0.99, | 0.329  | (0.00, | (0.02, | (-1.02, | 0.385  |
|                       | 12.94) | 9.83)  | 0.39)   |        | 6.75)  | 3.59)  | 0.49)  |        | 46.54)  | 36.14)  | 0.34)   |        | 5.84)  | 2.33)  | 0.40)   |        |
|                       | 7.17   | 10.88  | 1.45    |        | 0.73   | 1.03   | 1.19   |        | 31.46   | 30.91   | -0.05   |        | 0.54   | 0.53   | -0.05   |        |
| Dominica              | (0.18, | (0.70, | (1.41,  | <0.001 | (0.00, | (0.00, | (1.11, | <0.001 | (9.19,  | (8.51,  | (-0.24, | 0.601  | (0.00, | (0.00, | (-0.28, | 0.687  |
|                       | 43.84) | 48.45) | 1.48)   |        | 32.75) | 30.86) | 1.28)  |        | 80.38)  | 79.05)  | 0.14)   |        | 32.41) | 29.86) | 0.18)   |        |
|                       | 4.84   | 9.45   | 2.35    |        | 0.65   | 1.08   | 1.77   |        | 18.58   | 26.46   | 1.25    |        | 0.31   | 0.45   | 1.33    |        |
| Dominican<br>Republic | (3.74, | (8.22, | (2.13,  | <0.001 | (0.30, | (0.69, | (1.59, | <0.001 | (16.35, | (24.39, | (0.88,  | <0.001 | (0.09, | (0.21, | (0.89,  | <0.001 |
|                       | 6.19)  | 10.81) | 2.57)   |        | 1.27)  | 1.60)  | 1.95)  |        | 21.04)  | 28.68)  | 1.63)   |        | 0.82)  | 0.82)  | 1.76)   |        |
|                       | 4.03   | 6.62   | 1.73    |        | 0.43   | 0.68   | 1.57   |        | 15.04   | 16.40   | 0.15    |        | 0.25   | 0.27   | 0.17    |        |
| Ecuador               | (3.18, | (5.79, | (1.67,  | <0.001 | (0.19, | (0.44, | (1.42, | <0.001 | (13.37, | (15.11, | (-0.17, | 0.353  | (0.08, | (0.13, | (-0.23, | 0.401  |
|                       | 5.06)  | 7.53)  | 1.79)   |        | 0.86)  | 1.02)  | 1.73)  |        | 16.87)  | 17.78)  | 0.47)   |        | 0.61)  | 0.50)  | 0.57)   |        |
|                       | 6.06   | 8.45   | 1.16    |        | 1.20   | 1.52   | 0.82   |        | 18.96   | 17.73   | -0.23   |        | 0.31   | 0.29   | -0.14   |        |
| Egypt                 | (5.60, | (8.06, | (1.12,  | <0.001 | (1.00, | (1.36, | (0.75, | <0.001 | (18.15, | (17.16, | (-0.77, | 0.400  | (0.21, | (0.22, | (-0.50, | 0.452  |
|                       | 6.54)  | 8.85)  | 1.20)   |        | 1.43)  | 1.70)  | 0.89)  |        | 19.80)  | 18.31)  | 0.31)   |        | 0.44)  | 0.37)  | 0.22)   |        |
|                       | 4.16   | 6.41   | 1.51    |        | 0.41   | 0.66   | 1.66   |        | 16.16   | 10.96   | -1.29   |        | 0.27   | 0.19   | -1.19   |        |
| El Salvador           | (2.93, | (5.03, | (1.46,  | <0.001 | (0.11, | (0.28, | (1.48, | <0.001 | (13.64, | (9.12,  | (-2.21, | 0.006  | (0.04, | (0.02, | (-2.36, | 0.050  |
|                       | 5.77)  | 8.08)  | 1.57)   |        | 1.14)  | 1.35)  | 1.85)  |        | 19.05)  | 13.08)  | -0.37)  |        | 0.95)  | 0.69)  | 0.00)   |        |
|                       | 3.78   | 4.67   | 0.76    |        | 0.74   | 0.98   | 0.99   |        | 25.32   | 14.93   | -1.81   |        | 0.42   | 0.25   | -1.84   |        |
| Equatorial Guinea     | (0.59, | (2.63, | (0.67,  | <0.001 | (0.00, | (0.22, | (0.84, | <0.001 | (14.35, | (10.90, | (-2.09, | <0.001 | (0.00, | (0.00, | (-2.23, | <0.001 |
|                       | 13.44) | 7.93)  | 0.84)   |        | 8.66)  | 3.14)  | 1.14)  |        | 41.96)  | 20.12)  | -1.53)  |        | 8.14)  | 2.10)  | -1.44)  |        |
|                       | 5.15   | 4.98   | -0.07   |        | 0.72   | 0.81   | 0.42   |        | 33.47   | 31.85   | -0.14   |        | 0.56   | 0.54   | -0.08   |        |
| Eritrea               | (3.39, | (3.88, | (-0.14, | 0.028  | (0.19, | (0.41, | (0.37, | <0.001 | (28.67, | (28.91, | (-0.44, | 0.355  | (0.11, | (0.22, | (-0.39, | 0.609  |
|                       | 7.58)  | 6.32)  | -0.01)  |        | 2.02)  | 1.46)  | 0.48)  |        | 38.91)  | 35.01)  | 0.16)   |        | 1.81)  | 1.12)  | 0.23)   |        |
|                       | 8.43   | 10.56  | 0.78    |        | 1.15   | 1.35   | 0.56   |        | 37.51   | 29.03   | -0.86   |        | 0.63   | 0.50   | -0.78   |        |
| Estonia               | (5.44, | (6.69, | (0.69,  | <0.001 | (0.26, | (0.26, | (0.44, | <0.001 | (30.83, | (22.37, | (-1.75, | 0.064  | (0.07, | (0.02, | (-1.83, | 0.147  |
|                       | 12.53) | 16.23) | 0.87)   |        | 3.28)  | 4.61)  | 0.68)  |        | 45.27)  | 37.38)  | 0.05)   |        | 2.50)  | 3.31)  | 0.28)   |        |
|                       | 4.79   | 5.95   | 0.74    |        | 0.83   | 0.90   | 0.26   |        | 27.62   | 37.14   | 0.96    |        | 0.46   | 0.61   | 0.95    |        |
| Eswatini              | (1.73, | (3.26, | (0.71,  | <0.001 | (0.03, | (0.13, | (0.18, | <0.001 | (19.03, | (29.79, | (0.78,  | <0.001 | (0.00, | (0.04, | (0.73,  | <0.001 |
|                       | 11.08) | 10.08) | 0.77)   |        | 5.35)  | 3.30)  | 0.33)  |        | 39.14)  | 45.85)  | 1.14)   |        | 4.83)  | 2.88)  | 1.17)   |        |
|                       | 4.13   | 4.70   | 0.47    |        | 0.71   | 0.90   | 0.82   |        | 24.21   | 16.73   | -1.26   |        | 0.41   | 0.28   | -1.33   |        |
| Ethiopia              | (3.71, | (4.41, | (0.41,  | <0.001 | (0.54, | (0.77, | (0.65, | <0.001 | (23.14, | (16.16, | (-1.43, | <0.001 | (0.28, | (0.21, | (-1.61, | <0.001 |
|                       | 4.60)  | 5.01)  | 0.52)   |        | 0.92)  | 1.04)  | 1.00)  |        | 25.32)  | 17.32)  | -1.09)  |        | 0.58)  | 0.37)  | -1.05)  |        |

|           |        |        |        |        |        |        |         |        |         |         |         |        |        |        |         |        |
|-----------|--------|--------|--------|--------|--------|--------|---------|--------|---------|---------|---------|--------|--------|--------|---------|--------|
|           | 6.50   | 9.35   | 1.24   |        | 1.06   | 1.30   | 0.71    |        | 45.06   | 63.97   | 1.25    |        | 0.75   | 1.06   | 1.24    |        |
| Fiji      | (3.17, | (5.46, | (1.18, | <0.001 | (0.10, | (0.20, | (0.60,  | <0.001 | (35.24, | (52.90, | (0.33,  | 0.008  | (0.03, | (0.12, | (0.88,  | <0.001 |
|           | 12.02) | 14.96) | 1.31)  |        | 4.49)  | 4.31)  | 0.81)   |        | 56.91)  | 76.69)  | 2.17)   |        | 4.01)  | 3.92)  | 1.60)   |        |
|           | 7.15   | 7.81   | 0.28   |        | 1.18   | 1.02   | -0.51   |        | 11.49   | 7.30    | -1.54   |        | 0.20   | 0.12   | -1.77   |        |
| Finland   | (5.54, | (6.07, | (0.17, | <0.001 | (0.59, | (0.46, | (-0.62, | <0.001 | (9.45,  | (5.65,  | (-2.07, | <0.001 | (0.02, | (0.00, | (-2.46, | <0.001 |
|           | 9.12)  | 9.93)  | 0.39)  |        | 2.18)  | 2.01)  | -0.40)  |        | 13.87)  | 9.34)   | -1.00)  |        | 0.82)  | 0.73)  | -1.09)  |        |
|           | 5.92   | 7.59   | 0.87   |        | 1.21   | 1.08   | -0.40   |        | 5.42    | 8.31    | 1.44    |        | 0.09   | 0.14   | 1.51    |        |
| France    | (5.48, | (7.06, | (0.84, | <0.001 | (1.02, | (0.89, | (-0.47, | <0.001 | (5.00,  | (7.76,  | (0.79,  | <0.001 | (0.04, | (0.08, | (0.22,  | 0.022  |
|           | 6.39)  | 8.15)  | 0.90)  |        | 1.44)  | 1.31)  | -0.33)  |        | 5.87)   | 8.89)   | 2.09)   |        | 0.17)  | 0.24)  | 2.82)   |        |
|           | 4.66   | 5.16   | 0.35   |        | 1.00   | 1.07   | 0.23    |        | 27.80   | 24.62   | -0.50   |        | 0.47   | 0.42   | -0.43   |        |
| Gabon     | (2.10, | (3.05, | (0.32, | <0.001 | (0.11, | (0.27, | (0.16,  | <0.001 | (20.70, | (19.62, | (-1.08, | 0.095  | (0.01, | (0.03, | (-1.07, | 0.188  |
|           | 9.09)  | 8.24)  | 0.38)  |        | 3.96)  | 2.92)  | 0.30)   |        | 36.65)  | 30.53)  | 0.09)   |        | 3.13)  | 1.94)  | 0.21)   |        |
|           | 4.13   | 5.11   | 0.76   |        | 0.73   | 0.84   | 0.49    |        | 17.50   | 19.35   | 0.47    |        | 0.29   | 0.32   | 0.43    |        |
| Gambia    | (1.68, | (3.21, | (0.68, | <0.001 | (0.03, | (0.21, | (0.36,  | <0.001 | (11.70, | (15.35, | (-0.83, | 0.483  | (0.00, | (0.02, | (-0.91, | 0.534  |
|           | 8.83)  | 7.83)  | 0.84)  |        | 4.07)  | 2.40)  | 0.62)   |        | 25.43)  | 24.15)  | 1.78)   |        | 3.39)  | 1.65)  | 1.78)   |        |
|           | 4.06   | 4.79   | 0.58   |        | 0.40   | 0.46   | 0.54    |        | 6.59    | 9.30    | 0.79    |        | 0.11   | 0.16   | 1.00    |        |
| Georgia   | (2.94, | (3.21, | (0.53, | <0.001 | (0.11, | (0.09, | (0.44,  | <0.001 | (5.14,  | (7.06,  | (-2.11, | 0.598  | (0.00, | (0.00, | (-2.30, | 0.557  |
|           | 5.49)  | 6.93)  | 0.62)  |        | 1.02)  | 1.50)  | 0.63)   |        | 8.34)   | 12.09)  | 3.77)   |        | 0.57)  | 1.03)  | 4.41)   |        |
|           | 6.79   | 8.54   | 0.77   |        | 1.21   | 1.15   | -0.20   |        | 10.19   | 9.82    | -0.18   |        | 0.17   | 0.17   | -0.05   |        |
| Germany   | (6.38, | (8.05, | (0.70, | <0.001 | (1.04, | (0.97, | (-0.30, | <0.001 | (9.70,  | (9.31,  | (-0.68, | 0.480  | (0.11, | (0.11, | (-0.63, | 0.853  |
|           | 7.22)  | 9.05)  | 0.84)  |        | 1.40)  | 1.35)  | -0.09)  |        | 10.71)  | 10.36)  | 0.32)   |        | 0.26)  | 0.25)  | 0.52)   |        |
|           | 4.15   | 5.40   | 0.93   |        | 0.80   | 0.91   | 0.46    |        | 18.10   | 21.84   | 0.67    |        | 0.30   | 0.37   | 0.74    |        |
| Ghana     | (3.42, | (4.85, | (0.88, | <0.001 | (0.50, | (0.69, | (0.38,  | <0.001 | (16.48, | (20.70, | (0.51,  | <0.001 | (0.13, | (0.23, | (0.42,  | <0.001 |
|           | 5.01)  | 6.01)  | 0.97)  |        | 1.23)  | 1.18)  | 0.54)   |        | 19.84)  | 23.04)  | 0.82)   |        | 0.62)  | 0.56)  | 1.07)   |        |
|           | 5.76   | 7.26   | 0.81   |        | 0.72   | 0.78   | 0.25    |        | 1.91    | 7.46    | 4.72    |        | 0.03   | 0.13   | 5.31    |        |
| Greece    | (4.73, | (5.96, | (0.76, | <0.001 | (0.39, | (0.39, | (0.20,  | <0.001 | (1.34,  | (6.14,  | (4.32,  | <0.001 | (0.00, | (0.01, | (4.36,  | <0.001 |
|           | 6.95)  | 8.79)  | 0.86)  |        | 1.22)  | 1.40)  | 0.30)   |        | 2.64)   | 9.00)   | 5.13)   |        | 0.26)  | 0.51)  | 6.27)   |        |
|           | 4.87   | 5.55   | 0.47   |        | 1.39   | 1.21   | -0.48   |        | 10.04   | 7.86    | -0.83   |        | 0.18   | 0.14   | -0.79   |        |
| Greenland | (0.03, | (0.01, | (0.40, | <0.001 | (0.00, | (0.00, | (-0.58, | <0.001 | (0.73,  | (0.12,  | (-1.07, | <0.001 | (0.00, | (0.00, | (-1.29, | 0.002  |
|           | 49.06) | 54.67) | 0.54)  |        | 43.74) | 47.33) | -0.37)  |        | 56.10)  | 58.08)  | -0.59)  |        | 41.98) | 45.51) | -0.28)  |        |
|           | 8.76   | 14.33  | 1.70   |        | 1.15   | 1.63   | 1.19    |        | 52.20   | 43.32   | -0.69   |        | 0.90   | 0.74   | -0.75   |        |
| Grenada   | (0.50, | (2.81, | (1.66, | <0.001 | (0.00, | (0.00, | (1.10,  | <0.001 | (22.52, | (19.54, | (-1.64, | 0.160  | (0.00, | (0.00, | (-1.78, | 0.160  |
|           | 43.05) | 44.39) | 1.74)  |        | 30.16) | 23.96) | 1.27)   |        | 104.85) | 84.28)  | 0.27)   |        | 29.77) | 22.37) | 0.30)   |        |

|               |        |        |        |        |        |        |        |        |         |         |         |        |        |        |         |        |
|---------------|--------|--------|--------|--------|--------|--------|--------|--------|---------|---------|---------|--------|--------|--------|---------|--------|
|               | 4.92   | 7.82   | 1.61   |        | 0.74   | 1.02   | 1.11   |        | 10.12   | 32.44   | 4.10    |        | 0.17   | 0.55   | 4.16    |        |
| Guam          | (0.44, | (1.26, | (1.54, | <0.001 | (0.00, | (0.00, | (0.96, | <0.001 | (2.34,  | (15.54, | (3.37,  | <0.001 | (0.00, | (0.00, | (3.49,  | <0.001 |
|               | 20.65) | 26.17) | 1.68)  |        | 13.64) | 15.02) | 1.27)  |        | 28.69)  | 60.22)  | 4.83)   |        | 12.55) | 14.17) | 4.83)   |        |
|               | 3.96   | 5.73   | 1.30   |        | 0.35   | 0.56   | 1.63   |        | 6.72    | 13.12   | 2.27    |        | 0.11   | 0.22   | 2.14    |        |
| Guatemala     | (2.96, | (4.98, | (1.26, | <0.001 | (0.11, | (0.35, | (1.41, | <0.001 | (5.39,  | (11.96, | (1.64,  | <0.001 | (0.01, | (0.09, | (1.49,  | <0.001 |
|               | 5.22)  | 6.58)  | 1.33)  |        | 0.87)  | 0.87)  | 1.86)  |        | 8.30)   | 14.37)  | 2.89)   |        | 0.53)  | 0.45)  | 2.80)   |        |
|               | 3.63   | 4.54   | 0.83   |        | 0.59   | 0.71   | 0.66   |        | 18.26   | 19.13   | 0.19    |        | 0.31   | 0.32   | 0.12    |        |
| Guinea        | (2.53, | (3.68, | (0.70, | <0.001 | (0.21, | (0.40, | (0.55, | <0.001 | (15.59, | (17.24, | (-0.12, | 0.227  | (0.06, | (0.12, | (-0.02, | 0.102  |
|               | 5.08)  | 5.57)  | 0.97)  |        | 1.36)  | 1.21)  | 0.78)  |        | 21.28)  | 21.19)  | 0.50)   |        | 0.97)  | 0.72)  | 0.26)   |        |
|               | 3.73   | 4.61   | 0.74   |        | 0.34   | 0.42   | 0.75   |        | 18.18   | 17.98   | -0.06   |        | 0.31   | 0.30   | -0.18   |        |
| Guinea-Bissau | (1.39, | (2.69, | (0.73, | <0.001 | (0.00, | (0.03, | (0.45, | <0.001 | (12.09, | (13.82, | (-0.19, | 0.333  | (0.00, | (0.01, | (-0.39, | 0.098  |
|               | 8.46)  | 7.51)  | 0.76)  |        | 3.58)  | 2.00)  | 1.05)  |        | 26.52)  | 23.09)  | 0.06)   |        | 3.55)  | 1.83)  | 0.03)   |        |
|               | 5.54   | 11.88  | 2.66   |        | 0.61   | 1.11   | 2.07   |        | 26.80   | 62.71   | 3.13    |        | 0.45   | 1.08   | 3.19    |        |
| Guyana        | (2.49, | (6.99, | (2.60, | <0.001 | (0.01, | (0.10, | (1.96, | <0.001 | (19.27, | (50.57, | (2.21,  | <0.001 | (0.00, | (0.08, | (2.15,  | <0.001 |
|               | 10.89) | 19.01) | 2.71)  |        | 3.89)  | 4.71)  | 2.19)  |        | 36.48)  | 77.00)  | 4.06)   |        | 3.67)  | 4.69)  | 4.24)   |        |
|               | 4.66   | 7.66   | 1.79   |        | 0.43   | 0.70   | 1.73   |        | 25.37   | 25.15   | 0.05    |        | 0.43   | 0.43   | 0.07    |        |
| Haiti         | (3.47, | (6.61, | (1.65, | <0.001 | (0.13, | (0.41, | (1.59, | <0.001 | (22.44, | (23.20, | (-0.12, | 0.591  | (0.13, | (0.21, | (-0.16, | 0.568  |
|               | 6.14)  | 8.84)  | 1.93)  |        | 1.05)  | 1.13)  | 1.87)  |        | 28.57)  | 27.23)  | 0.22)   |        | 1.06)  | 0.79)  | 0.29)   |        |
|               | 4.46   | 6.32   | 1.22   |        | 0.37   | 0.57   | 1.50   |        | 5.68    | 3.57    | -1.59   |        | 0.10   | 0.06   | -1.76   |        |
| Honduras      | (3.09, | (5.23, | (1.18, | <0.001 | (0.07, | (0.28, | (1.25, | <0.001 | (4.09,  | (2.75,  | (-1.94, | <0.001 | (0.00, | (0.00, | (-2.66, | <0.001 |
|               | 6.27)  | 7.58)  | 1.26)  |        | 1.17)  | 1.04)  | 1.75)  |        | 7.71)   | 4.57)   | -1.24)  |        | 0.76)  | 0.35)  | -0.85)  |        |
|               | 5.98   | 7.26   | 0.68   |        | 0.63   | 0.72   | 0.44   |        | 11.75   | 13.00   | 0.37    |        | 0.20   | 0.22   | 0.40    |        |
| Hungary       | (4.92, | (5.95, | (0.62, | <0.001 | (0.32, | (0.35, | (0.36, | <0.001 | (10.27, | (11.25, | (0.04,  | 0.026  | (0.05, | (0.05, | (-0.14, | 0.150  |
|               | 7.21)  | 8.79)  | 0.74)  |        | 1.12)  | 1.33)  | 0.52)  |        | 13.41)  | 14.98)  | 0.69)   |        | 0.55)  | 0.66)  | 0.95)   |        |
|               | 5.79   | 9.09   | 1.58   |        | 0.96   | 1.13   | 0.58   |        | 2.86    | 4.34    | 1.53    |        | 0.05   | 0.07   | 1.19    |        |
| Iceland       | (1.23, | (3.24, | (1.52, | <0.001 | (0.00, | (0.01, | (0.50, | <0.001 | (0.21,  | (0.82,  | (1.18,  | <0.001 | (0.00, | (0.00, | (1.19,  | <0.001 |
|               | 17.02) | 21.00) | 1.64)  |        | 9.28)  | 9.40)  | 0.66)  |        | 12.52)  | 14.27)  | 1.87)   |        | 7.58)  | 7.61)  | 1.19)   |        |
|               | 3.50   | 4.86   | 1.17   |        | 0.36   | 0.48   | 0.99   |        | 11.30   | 11.95   | 0.22    |        | 0.19   | 0.21   | 0.36    |        |
| India         | (3.41, | (4.78, | (1.05, | <0.001 | (0.33, | (0.46, | (0.82, | <0.001 | (11.14, | (11.83, | (-0.35, | 0.452  | (0.17, | (0.19, | (-0.41, | 0.359  |
|               | 3.59)  | 4.94)  | 1.30)  |        | 0.39)  | 0.51)  | 1.16)  |        | 11.47)  | 12.07)  | 0.79)   |        | 0.22)  | 0.22)  | 1.14)   |        |
|               | 4.85   | 6.41   | 1.01   |        | 0.98   | 1.19   | 0.66   |        | 25.06   | 23.25   | -0.28   |        | 0.42   | 0.39   | -0.31   |        |
| Indonesia     | (4.63, | (6.20, | (0.89, | <0.001 | (0.89, | (1.10, | (0.59, | <0.001 | (24.55, | (22.84, | (-0.40, | <0.001 | (0.36, | (0.34, | (-0.38, | <0.001 |
|               | 5.08)  | 6.63)  | 1.12)  |        | 1.09)  | 1.29)  | 0.74)  |        | 25.58)  | 23.66)  | -0.16)  |        | 0.50)  | 0.45)  | -0.23)  |        |



|                            |        |        |         |        |        |        |         |        |         |          |         |        |        |        |         |        |
|----------------------------|--------|--------|---------|--------|--------|--------|---------|--------|---------|----------|---------|--------|--------|--------|---------|--------|
| Iran (Islamic Republic of) | 7.12   | 9.27   | 0.93    |        | 1.13   | 1.33   | 0.57    |        | 11.74   | 11.24    | -0.15   |        | 0.20   | 0.19   | -0.15   |        |
|                            | (6.62, | (8.83, | (0.88,  | <0.001 | (0.94, | (1.17, | (0.46,  | <0.001 | (11.09, | (10.75,  | (-0.37, | 0.204  | (0.12, | (0.13, | (-0.51, | 0.416  |
|                            | 7.65)  | 9.74)  | 0.97)   |        | 1.36)  | 1.52)  | 0.68)   |        | 12.42)  | 11.74)   | 0.08)   |        | 0.31)  | 0.26)  | 0.21)   |        |
| Iraq                       | 6.43   | 7.90   | 0.73    |        | 0.86   | 1.01   | 0.57    |        | 9.65    | 8.19     | -0.54   |        | 0.16   | 0.14   | -0.57   |        |
|                            | (5.56, | (7.33, | (0.67,  | <0.001 | (0.56, | (0.82, | (0.51,  | <0.001 | (8.57,  | (7.61,   | (-0.75, | <0.001 | (0.05, | (0.07, | (-0.92, | 0.001  |
|                            | 7.39)  | 8.50)  | 0.78)   |        | 1.27)  | 1.25)  | 0.63)   |        | 10.84)  | 8.81)    | -0.34)  |        | 0.40)  | 0.24)  | -0.22)  |        |
| Ireland                    | 6.27   | 7.92   | 0.82    |        | 0.76   | 0.83   | 0.30    |        | 2.98    | 4.56     | 1.34    |        | 0.05   | 0.08   | 1.53    |        |
|                            | (4.53, | (6.10, | (0.77,  | <0.001 | (0.25, | (0.33, | (0.25,  | <0.001 | (1.82,  | (3.23,   | (0.93,  | <0.001 | (0.00, | (0.00, | (0.82,  | <0.001 |
|                            | 8.48)  | 10.15) | 0.86)   |        | 1.78)  | 1.78)  | 0.36)   |        | 4.62)   | 6.28)    | 1.75)   |        | 0.68)  | 0.66)  | 2.25)   |        |
| Israel                     | 5.87   | 7.76   | 0.97    |        | 1.21   | 1.22   | 0.03    |        | 8.72    | 8.62     | -0.05   |        | 0.15   | 0.15   | 0.01    |        |
|                            | (4.42, | (6.47, | (0.94,  | <0.001 | (0.61, | (0.75, | (-0.02, | 0.237  | (6.91,  | (7.26,   | (-0.43, | 0.809  | (0.01, | (0.02, | (-0.96, | 0.978  |
|                            | 7.65)  | 9.23)  | 1.00)   |        | 2.17)  | 1.89)  | 0.08)   |        | 10.87)  | 10.17)   | 0.34)   |        | 0.69)  | 0.49)  | 1.00)   |        |
| Italy                      | 9.28   | 6.05   | -1.48   |        | 1.29   | 0.89   | -1.29   |        | 3.10    | 7.92     | 3.26    |        | 0.05   | 0.13   | 3.60    |        |
|                            | (8.71, | (5.54, | (-1.74, | <0.001 | (1.08, | (0.70, | (-1.61, | <0.001 | (2.78,  | (7.33,   | (2.31,  | <0.001 | (0.02, | (0.07, | (2.92,  | <0.001 |
|                            | 9.87)  | 6.60)  | -1.22)  |        | 1.52)  | 1.12)  | -0.97)  |        | 3.45)   | 8.55)    | 4.22)   |        | 0.12)  | 0.24)  | 4.29)   |        |
| Jamaica                    | 5.98   | 11.27  | 2.20    |        | 0.82   | 1.31   | 1.63    |        | 12.50   | 23.06    | 2.31    |        | 0.21   | 0.39   | 2.22    |        |
|                            | (3.91, | (8.69, | (2.15,  | <0.001 | (0.21, | (0.55, | (1.57,  | <0.001 | (9.45,  | (19.31,  | (0.46,  | 0.014  | (0.00, | (0.05, | (0.06,  | 0.044  |
|                            | 8.84)  | 14.40) | 2.24)   |        | 2.33)  | 2.66)  | 1.68)   |        | 16.31)  | 27.36)   | 4.18)   |        | 1.41)  | 1.36)  | 4.42)   |        |
| Japan                      | 8.62   | 7.35   | -0.55   |        | 1.54   | 1.37   | -0.41   |        | 4.55    | 5.59     | 0.73    |        | 0.08   | 0.09   | 0.58    |        |
|                            | (8.25, | (6.95, | (-0.58, | <0.001 | (1.39, | (1.20, | (-0.47, | <0.001 | (4.28,  | (5.24,   | (0.16,  | 0.012  | (0.04, | (0.05, | (0.25,  | 0.001  |
|                            | 9.01)  | 7.77)  | -0.52)  |        | 1.72)  | 1.56)  | -0.35)  |        | 4.84)   | 5.95)    | 1.29)   |        | 0.12)  | 0.15)  | 0.92)   |        |
| Jordan                     | 8.16   | 9.15   | 0.39    |        | 2.07   | 2.25   | 0.28    |        | 19.56   | 12.27    | -1.58   |        | 0.33   | 0.21   | -1.53   |        |
|                            | (6.15, | (8.04, | (0.35,  | <0.001 | (1.13, | (1.72, | (0.23,  | <0.001 | (16.28, | (10.98,  | (-2.07, | <0.001 | (0.04, | (0.07, | (-2.07, | <0.001 |
|                            | 10.70) | 10.37) | 0.42)   |        | 3.59)  | 2.90)  | 0.34)   |        | 23.37)  | 13.68)   | -1.09)  |        | 1.31)  | 0.47)  | -0.99)  |        |
| Kazakhstan                 | 4.00   | 4.95   | 0.74    |        | 0.38   | 0.46   | 0.65    |        | 13.40   | 18.09    | 1.00    |        | 0.23   | 0.31   | 0.99    |        |
|                            | (3.36, | (4.24, | (0.66,  | <0.001 | (0.20, | (0.26, | (0.48,  | <0.001 | (12.20, | (16.72,  | (0.20,  | 0.014  | (0.10, | (0.16, | (0.08,  | 0.033  |
|                            | 4.74)  | 5.75)  | 0.81)   |        | 0.65)  | 0.76)  | 0.82)   |        | 14.70)  | 19.54)   | 1.80)   |        | 0.46)  | 0.57)  | 1.90)   |        |
| Kenya                      | 4.84   | 5.52   | 0.52    |        | 1.24   | 1.26   | 0.06    |        | 19.77   | 21.77    | 0.30    |        | 0.33   | 0.37   | 0.34    |        |
|                            | (4.17, | (5.08, | (0.42,  | <0.001 | (0.92, | (1.05, | (-0.01, | 0.110  | (18.37, | (20.86,  | (0.11,  | 0.002  | (0.17, | (0.26, | (0.06,  | 0.016  |
|                            | 5.59)  | 6.00)  | 0.62)   |        | 1.66)  | 1.50)  | 0.13)   |        | 21.27)  | 22.71)   | 0.49)   |        | 0.60)  | 0.51)  | 0.61)   |        |
| Kiribati                   | 8.99   | 9.04   | 0.01    |        | 0.99   | 1.07   | 0.26    |        | 122.91  | 153.34   | 0.77    |        | 2.08   | 2.61   | 0.79    |        |
|                            | (0.43, | (1.19, | (-0.03, | 0.539  | (0.00, | (0.00, | (0.12,  | <0.001 | (71.67, | (107.12, | (0.62,  | <0.001 | (0.00, | (0.01, | (0.65,  | <0.001 |
|                            | 47.29) | 32.90) | 0.05)   |        | 33.85) | 19.62) | 0.39)   |        | 198.99) | 213.38)  | 0.91)   |        | 35.84) | 22.45) | 0.93)   |        |

|              |        |        |         |        |        |        |         |        |         |         |         |        |        |        |         |        |
|--------------|--------|--------|---------|--------|--------|--------|---------|--------|---------|---------|---------|--------|--------|--------|---------|--------|
|              | 6.69   | 8.79   | 0.95    |        | 0.91   | 1.11   | 0.69    |        | 4.55    | 6.91    | 1.62    |        | 0.07   | 0.11   | 1.82    |        |
| Kuwait       | (4.60, | (7.05, | (0.92,  | <0.001 | (0.28, | (0.56, | (0.62,  | <0.001 | (2.90,  | (5.41,  | (0.44,  | 0.007  | (0.00, | (0.01, | (0.65,  | 0.002  |
|              | 9.60)  | 10.95) | 0.99)   |        | 2.51)  | 2.13)  | 0.76)   |        | 7.02)   | 8.81)   | 2.81)   |        | 1.34)  | 0.82)  | 3.01)   |        |
|              | 3.60   | 4.18   | 0.53    |        | 0.35   | 0.40   | 0.56    |        | 7.16    | 8.88    | 0.78    |        | 0.12   | 0.15   | 0.61    |        |
| Kyrgyzstan   | (2.45, | (3.15, | (0.45,  | <0.001 | (0.07, | (0.13, | (0.37,  | <0.001 | (5.48,  | (7.35,  | (-0.31, | 0.161  | (0.00, | (0.02, | (-0.57, | 0.313  |
|              | 5.13)  | 5.45)  | 0.62)   |        | 1.06)  | 0.93)  | 0.75)   |        | 9.22)   | 10.65)  | 1.88)   |        | 0.72)  | 0.57)  | 1.82)   |        |
| Lao People's | 3.83   | 5.20   | 1.09    |        | 0.61   | 0.78   | 0.92    |        | 21.85   | 31.01   | 1.26    |        | 0.37   | 0.52   | 1.19    |        |
| Democratic   | (2.52, | (4.13, | (1.00,  | <0.001 | (0.17, | (0.41, | (0.81,  | <0.001 | (18.49, | (28.31, | (1.09,  | <0.001 | (0.06, | (0.23, | (0.91,  | <0.001 |
| Republic     | 5.63)  | 6.47)  | 1.18)   |        | 1.58)  | 1.37)  | 1.03)   |        | 25.68)  | 33.90)  | 1.43)   |        | 1.25)  | 1.04)  | 1.48)   |        |
|              | 7.59   | 10.12  | 1.03    |        | 0.65   | 0.87   | 1.03    |        | 24.97   | 18.37   | -1.05   |        | 0.43   | 0.32   | -0.96   |        |
| Latvia       | (5.35, | (6.83, | (0.90,  | <0.001 | (0.14, | (0.15, | (0.80,  | <0.001 | (20.75, | (13.94, | (-2.28, | 0.096  | (0.06, | (0.01, | (-2.22, | 0.137  |
|              | 10.50) | 14.68) | 1.16)   |        | 1.91)  | 3.12)  | 1.26)   |        | 29.82)  | 23.99)  | 0.19)   |        | 1.57)  | 2.27)  | 0.31)   |        |
|              | 10.00  | 11.94  | 0.59    |        | 1.22   | 1.46   | 0.60    |        | 17.13   | 13.60   | -0.77   |        | 0.29   | 0.23   | -0.90   |        |
| Lebanon      | (7.51, | (9.93, | (0.51,  | <0.001 | (0.48, | (0.82, | (0.51,  | <0.001 | (13.84, | (11.45, | (-0.95, | <0.001 | (0.02, | (0.03, | (-1.05, | <0.001 |
|              | 13.09) | 14.26) | 0.66)   |        | 2.64)  | 2.44)  | 0.68)   |        | 21.01)  | 16.07)  | -0.60)  |        | 1.30)  | 0.81)  | -0.75)  |        |
|              | 4.39   | 5.66   | 0.89    |        | 0.77   | 0.85   | 0.33    |        | 26.26   | 36.87   | 1.19    |        | 0.43   | 0.61   | 1.19    |        |
| Lesotho      | (2.39, | (3.74, | (0.84,  | <0.001 | (0.13, | (0.24, | (0.27,  | <0.001 | (20.88, | (31.64, | (0.98,  | <0.001 | (0.02, | (0.12, | (0.88,  | <0.001 |
|              | 7.53)  | 8.25)  | 0.94)   |        | 2.70)  | 2.19)  | 0.40)   |        | 32.70)  | 42.74)  | 1.40)   |        | 2.22)  | 1.84)  | 1.51)   |        |
|              | 3.72   | 4.67   | 0.82    |        | 0.57   | 0.69   | 0.72    |        | 20.27   | 14.10   | -1.44   |        | 0.34   | 0.24   | -1.42   |        |
| Liberia      | (1.85, | (3.39, | (0.73,  | <0.001 | (0.05, | (0.27, | (0.59,  | <0.001 | (15.32, | (11.76, | (-1.76, | <0.001 | (0.01, | (0.03, | (-1.80, | <0.001 |
|              | 6.78)  | 6.29)  | 0.92)   |        | 2.47)  | 1.50)  | 0.85)   |        | 26.37)  | 16.79)  | -1.11)  |        | 2.11)  | 0.86)  | -1.03)  |        |
|              | 5.65   | 7.41   | 0.94    |        | 0.77   | 1.00   | 0.90    |        | 11.13   | 10.34   | -0.29   |        | 0.18   | 0.17   | -0.17   |        |
| Libya        | (4.15, | (6.13, | (0.90,  | <0.001 | (0.30, | (0.57, | (0.79,  | <0.001 | (9.00,  | (8.81,  | (-0.99, | 0.413  | (0.01, | (0.03, | (-0.93, | 0.662  |
|              | 7.55)  | 8.90)  | 0.98)   |        | 1.69)  | 1.64)  | 1.01)   |        | 13.65)  | 12.07)  | 0.41)   |        | 0.85)  | 0.55)  | 0.59)   |        |
|              | 7.07   | 9.42   | 0.99    |        | 0.75   | 0.96   | 0.83    |        | 25.61   | 21.30   | -0.71   |        | 0.44   | 0.37   | -0.66   |        |
| Lithuania    | (5.24, | (6.78, | (0.74,  | <0.001 | (0.26, | (0.27, | (0.66,  | <0.001 | (22.03, | (17.29, | (-1.75, | 0.184  | (0.10, | (0.03, | (-1.70, | 0.223  |
|              | 9.34)  | 12.86) | 1.24)   |        | 1.74)  | 2.58)  | 0.99)   |        | 29.63)  | 26.07)  | 0.34)   |        | 1.29)  | 1.71)  | 0.40)   |        |
|              | 5.82   | 7.56   | 0.90    |        | 1.69   | 1.60   | -0.21   |        | 9.08    | 14.15   | 1.42    |        | 0.15   | 0.24   | 1.43    |        |
| Luxembourg   | (1.71, | (3.34, | (0.83,  | <0.001 | (0.08, | (0.15, | (-0.33, | <0.001 | (3.64,  | (8.11,  | (0.47,  | 0.003  | (0.00, | (0.00, | (0.64,  | <0.001 |
|              | 15.62) | 15.38) | 0.98)   |        | 9.71)  | 7.22)  | -0.10)  |        | 19.96)  | 23.59)  | 2.38)   |        | 7.32)  | 5.09)  | 2.24)   |        |
|              | 7.88   | 7.24   | -0.31   |        | 1.36   | 1.43   | 0.16    |        | 75.66   | 49.64   | -1.49   |        | 1.28   | 0.84   | -1.51   |        |
| Madagascar   | (6.71, | (6.52, | (-0.39, | <0.001 | (0.91, | (1.12, | (0.10,  | <0.001 | (71.92, | (47.70, | (-1.94, | <0.001 | (0.83, | (0.60, | (-2.01, | <0.001 |
|              | 9.21)  | 8.02)  | -0.23)  |        | 1.99)  | 1.80)  | 0.22)   |        | 79.56)  | 51.64)  | -1.05)  |        | 1.90)  | 1.14)  | -1.00)  |        |

|                   |         |         |         |        |         |        |         |        |         |         |         |        |         |        |         |        |
|-------------------|---------|---------|---------|--------|---------|--------|---------|--------|---------|---------|---------|--------|---------|--------|---------|--------|
|                   | 4.17    | 5.16    | 0.76    |        | 0.81    | 0.92   | 0.48    |        | 22.86   | 28.44   | 0.76    |        | 0.38    | 0.48   | 0.77    |        |
| Malawi            | (3.24,  | (4.42,  | (0.69,  | <0.001 | (0.43,  | (0.62, | (0.36,  | <0.001 | (20.57, | (26.64, | (0.56,  | <0.001 | (0.14,  | (0.27, | (0.41,  | <0.001 |
|                   | 5.31)   | 6.00)   | 0.83)   |        | 1.41)   | 1.32)  | 0.60)   |        | 25.36)  | 30.34)  | 0.95)   |        | 0.87)   | 0.79)  | 1.13)   |        |
|                   | 11.17   | 11.31   | 0.00    |        | 3.16    | 3.51   | 0.37    |        | 91.79   | 69.56   | -0.97   |        | 1.56    | 1.19   | -0.95   |        |
| Malaysia          | (10.10, | (10.55, | (-0.14, | 0.958  | (2.61,  | (3.09, | (0.34,  | <0.001 | (88.68, | (67.68, | (-1.71, | 0.011  | (1.17,  | (0.96, | (-1.71, | 0.016  |
|                   | 12.32)  | 12.10)  | 0.14)   |        | 3.81)   | 3.96)  | 0.40)   |        | 94.98)  | 71.49)  | -0.23)  |        | 2.03)   | 1.47)  | -0.17)  |        |
|                   | 5.03    | 6.50    | 0.86    |        | 1.22    | 1.46   | 0.62    |        | 22.73   | 14.21   | -1.45   |        | 0.38    | 0.24   | -1.41   |        |
| Maldives          | (0.50,  | (3.11,  | (0.80,  | <0.001 | (0.00,  | (0.20, | (0.57,  | <0.001 | (9.72,  | (8.89,  | (-2.14, | <0.001 | (0.00,  | (0.00, | (-2.07, | <0.001 |
|                   | 22.49)  | 13.38)  | 0.93)   |        | 16.60)  | 6.92)  | 0.67)   |        | 47.09)  | 22.73)  | -0.75)  |        | 15.29)  | 5.29)  | -0.75)  |        |
|                   | 3.69    | 4.29    | 0.54    |        | 0.59    | 0.66   | 0.40    |        | 15.33   | 15.54   | 0.06    |        | 0.26    | 0.26   | -0.01   |        |
| Mali              | (2.74,  | (3.64,  | (0.38,  | <0.001 | (0.25,  | (0.42, | (0.20,  | <0.001 | (13.25, | (14.23, | (-0.22, | 0.673  | (0.06,  | (0.12, | (-0.41, | 0.953  |
|                   | 4.90)   | 5.04)   | 0.71)   |        | 1.21)   | 1.01)  | 0.59)   |        | 17.67)  | 16.95)  | 0.34)   |        | 0.76)   | 0.52)  | 0.38)   |        |
|                   | 5.49    | 7.67    | 1.15    |        | 1.41    | 1.33   | -0.21   |        | 5.12    | 12.69   | 3.08    |        | 0.08    | 0.21   | 3.20    |        |
| Malta             | (1.47,  | (2.67,  | (1.04,  | <0.001 | (0.03,  | (0.03, | (-0.32, | <0.001 | (1.27,  | (5.90,  | (2.69,  | <0.001 | (0.00,  | (0.00, | (2.43,  | <0.001 |
|                   | 14.80)  | 18.73)  | 1.26)   |        | 8.66)   | 9.82)  | -0.09)  |        | 14.31)  | 25.22)  | 3.47)   |        | 6.36)   | 8.09)  | 3.97)   |        |
|                   | 4.55    | 5.81    | 0.86    |        | 0.52    | 0.63   | 0.68    |        | 27.50   | 46.40   | 1.80    |        | 0.46    | 0.79   | 1.86    |        |
| Marshall Islands  | (0.00,  | (0.04,  | (0.81,  | <0.001 | (0.00,  | (0.00, | (0.59,  | <0.001 | (3.91,  | (16.41, | (1.68,  | <0.001 | (0.00,  | (0.00, | (1.63,  | <0.001 |
|                   | 60.73)  | 42.16)  | 0.91)   |        | 53.49)  | 32.42) | 0.78)   |        | 98.23)  | 103.64) | 1.92)   |        | 53.41)  | 32.73) | 2.09)   |        |
|                   | 4.40    | 4.84    | 0.32    |        | 0.76    | 0.83   | 0.31    |        | 20.37   | 9.74    | -2.54   |        | 0.34    | 0.16   | -2.55   |        |
| Mauritania        | (2.50,  | (3.39,  | (0.22,  | <0.001 | (0.14,  | (0.30, | (0.24,  | <0.001 | (15.85, | (7.55,  | (-2.67, | <0.001 | (0.01,  | (0.01, | (-2.72, | <0.001 |
|                   | 7.27)   | 6.76)   | 0.42)   |        | 2.50)   | 1.88)  | 0.38)   |        | 25.83)  | 12.40)  | -2.41)  |        | 1.87)   | 0.92)  | -2.39)  |        |
|                   | 5.19    | 8.25    | 1.62    |        | 0.87    | 1.10   | 0.78    |        | 11.78   | 33.55   | 3.73    |        | 0.20    | 0.58   | 3.77    |        |
| Mauritius         | (2.78,  | (5.03,  | (1.57,  | <0.001 | (0.12,  | (0.20, | (0.69,  | <0.001 | (7.94,  | (26.68, | (2.96,  | <0.001 | (0.00,  | (0.04, | (2.96,  | <0.001 |
|                   | 8.91)   | 12.83)  | 1.67)   |        | 3.06)   | 3.54)  | 0.86)   |        | 16.86)  | 41.73)  | 4.50)   |        | 1.96)   | 2.71)  | 4.58)   |        |
|                   | 4.56    | 7.70    | 1.79    |        | 0.53    | 0.82   | 1.50    |        | 7.59    | 11.64   | 1.62    |        | 0.13    | 0.20   | 1.66    |        |
| Mexico            | (4.23,  | (7.35,  | (1.69,  | <0.001 | (0.42,  | (0.72, | (1.32,  | <0.001 | (7.16,  | (11.21, | (1.07,  | <0.001 | (0.08,  | (0.14, | (0.76,  | <0.001 |
|                   | 4.90)   | 8.05)   | 1.88)   |        | 0.65)   | 0.95)  | 1.68)   |        | 8.03)   | 12.07)  | 2.17)   |        | 0.20)   | 0.26)  | 2.56)   |        |
| Micronesia        | 4.52    | 6.35    | 1.18    |        | 0.52    | 0.68   | 0.95    |        | 30.01   | 48.97   | 1.69    |        | 0.51    | 0.82   | 1.66    |        |
| (Federated States | (0.07,  | (0.35,  | (1.13,  | <0.001 | (0.00,  | (0.00, | (0.86,  | <0.001 | (10.60, | (23.55, | (1.58,  | <0.001 | (0.00,  | (0.00, | (1.57,  | <0.001 |
| of)               | 29.96)  | 31.58)  | 1.23)   |        | 22.94)  | 21.92) | 1.04)   |        | 68.06)  | 91.16)  | 1.80)   |        | 22.97)  | 22.22) | 1.75)   |        |
|                   | 9.02    | 11.19   | 0.72    |        | 2.03    | 1.87   | -0.30   |        | 33.58   | 29.99   | -0.38   |        | 0.57    | 0.52   | -0.31   |        |
| Monaco            | (0.00,  | (0.02,  | (0.65,  | <0.001 | (0.00,  | (0.00, | (-0.39, | <0.001 | (2.80,  | (1.93,  | (-0.44, | <0.001 | (0.00,  | (0.00, | (-0.43, | <0.001 |
|                   | 133.71) | 107.03) | 0.79)   |        | 123.00) | 89.90) | -0.20)  |        | 169.81) | 138.66) | -0.33)  |        | 120.68) | 87.25) | -0.19)  |        |

|             |         |         |         |        |         |         |         |        |         |         |         |        |         |         |         |        |
|-------------|---------|---------|---------|--------|---------|---------|---------|--------|---------|---------|---------|--------|---------|---------|---------|--------|
|             | 3.74    | 4.66    | 0.77    |        | 0.32    | 0.41    | 0.92    |        | 5.71    | 6.38    | 0.25    |        | 0.10    | 0.11    | 0.33    |        |
| Mongolia    | (2.10,  | (3.18,  | (0.70,  | <0.001 | (0.02,  | (0.07,  | (0.64,  | <0.001 | (3.59,  | (4.66,  | (-0.10, | 0.168  | (0.00,  | (0.00,  | (-0.78, | 0.566  |
|             | 6.32)   | 6.67)   | 0.85)   |        | 1.77)   | 1.36)   | 1.19)   |        | 8.75)   | 8.60)   | 0.60)   |        | 1.43)   | 0.90)   | 1.44)   |        |
|             | 5.12    | 6.24    | 0.69    |        | 0.49    | 0.57    | 0.53    |        | 6.50    | 4.51    | -1.61   |        | 0.11    | 0.08    | -1.73   |        |
| Montenegro  | (2.00,  | (2.48,  | (0.63,  | <0.001 | (0.00,  | (0.00,  | (0.29,  | <0.001 | (2.90,  | (1.47,  | (-3.02, | 0.028  | (0.00,  | (0.00,  | (-4.35, | 0.204  |
|             | 10.81)  | 13.20)  | 0.76)   |        | 3.91)   | 4.87)   | 0.77)   |        | 12.64)  | 10.79)  | -0.18)  |        | 3.21)   | 3.98)   | 0.96)   |        |
|             | 5.79    | 7.84    | 1.06    |        | 0.75    | 0.95    | 0.83    |        | 7.86    | 7.38    | -0.18   |        | 0.13    | 0.12    | -0.26   |        |
| Morocco     | (5.14,  | (7.21,  | (1.03,  | <0.001 | (0.53,  | (0.74,  | (0.79,  | <0.001 | (7.09,  | (6.77,  | (-0.52, | 0.277  | (0.05,  | (0.06,  | (-0.91, | 0.434  |
|             | 6.51)   | 8.51)   | 1.09)   |        | 1.04)   | 1.20)   | 0.87)   |        | 8.71)   | 8.02)   | 0.15)   |        | 0.29)   | 0.23)   | 0.39)   |        |
|             | 3.84    | 5.40    | 1.26    |        | 0.63    | 0.83    | 0.97    |        | 17.90   | 27.11   | 1.46    |        | 0.30    | 0.46    | 1.53    |        |
| Mozambique  | (3.02,  | (4.77,  | (1.10,  | <0.001 | (0.33,  | (0.59,  | (0.84,  | <0.001 | (16.03, | (25.62, | (1.33,  | <0.001 | (0.11,  | (0.28,  | (1.36,  | <0.001 |
|             | 4.82)   | 6.11)   | 1.42)   |        | 1.11)   | 1.14)   | 1.10)   |        | 19.94)  | 28.66)  | 1.60)   |        | 0.69)   | 0.71)   | 1.70)   |        |
|             | 4.88    | 6.11    | 0.79    |        | 0.86    | 1.06    | 0.72    |        | 43.51   | 40.38   | -0.26   |        | 0.73    | 0.67    | -0.29   |        |
| Myanmar     | (4.41,  | (5.65,  | (0.75,  | <0.001 | (0.67,  | (0.88,  | (0.62,  | <0.001 | (42.08, | (39.18, | (-0.44, | 0.005  | (0.55,  | (0.52,  | (-0.38, | <0.001 |
|             | 5.39)   | 6.60)   | 0.82)   |        | 1.09)   | 1.28)   | 0.83)   |        | 44.98)  | 41.61)  | -0.08)  |        | 0.95)   | 0.85)   | -0.19)  |        |
|             | 5.02    | 5.95    | 0.59    |        | 1.04    | 1.14    | 0.31    |        | 26.16   | 28.44   | 0.33    |        | 0.43    | 0.47    | 0.34    |        |
| Namibia     | (2.63,  | (3.98,  | (0.55,  | <0.001 | (0.19,  | (0.40,  | (0.20,  | <0.001 | (20.18, | (23.90, | (0.01,  | 0.042  | (0.01,  | (0.07,  | (-0.02, | 0.063  |
|             | 8.90)   | 8.59)   | 0.62)   |        | 3.57)   | 2.61)   | 0.43)   |        | 33.53)  | 33.64)  | 0.64)   |        | 2.70)   | 1.67)   | 0.70)   |        |
|             | 5.71    | 7.47    | 0.92    |        | 0.65    | 0.80    | 0.69    |        | 41.54   | 54.30   | 0.92    |        | 0.70    | 0.91    | 0.92    |        |
| Nauru       | (0.00,  | (0.00,  | (0.90,  | <0.001 | (0.00,  | (0.00,  | (0.61,  | <0.001 | (0.51,  | (2.38,  | (0.83,  | <0.001 | (0.00,  | (0.00,  | (0.78,  | <0.001 |
|             | 218.46) | 200.75) | 0.95)   |        | 208.79) | 188.22) | 0.78)   |        | 282.98) | 281.91) | 1.02)   |        | 208.92) | 188.46) | 1.05)   |        |
|             | 3.11    | 4.27    | 1.12    |        | 0.30    | 0.40    | 1.03    |        | 7.55    | 8.91    | 0.59    |        | 0.13    | 0.15    | 0.48    |        |
| Nepal       | (2.54,  | (3.74,  | (1.07,  | <0.001 | (0.14,  | (0.25,  | (0.84,  | <0.001 | (6.63,  | (8.13,  | (0.47,  | <0.001 | (0.04,  | (0.07,  | (-0.16, | 0.143  |
|             | 3.77)   | 4.85)   | 1.16)   |        | 0.55)   | 0.61)   | 1.21)   |        | 8.56)   | 9.74)   | 0.71)   |        | 0.33)   | 0.30)   | 1.14)   |        |
|             | 5.86    | 8.08    | 1.12    |        | 1.03    | 1.15    | 0.40    |        | 4.13    | 7.80    | 2.26    |        | 0.07    | 0.13    | 2.16    |        |
| Netherlands | (5.04,  | (7.05,  | (1.09,  | <0.001 | (0.70,  | (0.78,  | (0.37,  | <0.001 | (3.45,  | (6.79,  | (1.74,  | <0.001 | (0.01,  | (0.03,  | (1.23,  | <0.001 |
|             | 6.78)   | 9.23)   | 1.15)   |        | 1.46)   | 1.64)   | 0.43)   |        | 4.91)   | 8.93)   | 2.78)   |        | 0.26)   | 0.36)   | 3.11)   |        |
|             | 7.84    | 5.55    | -1.19   |        | 0.92    | 0.68    | -1.05   |        | 6.16    | 5.59    | -0.28   |        | 0.10    | 0.09    | -0.41   |        |
| New Zealand | (5.89,  | (3.94,  | (-1.25, | <0.001 | (0.35,  | (0.21,  | (-1.25, | <0.001 | (4.45,  | (3.97,  | (-1.02, | 0.466  | (0.00,  | (0.00,  | (-1.43, | 0.433  |
|             | 10.24)  | 7.60)   | -1.13)  |        | 1.97)   | 1.63)   | -0.86)  |        | 8.32)   | 7.66)   | 0.47)   |        | 0.74)   | 0.73)   | 0.62)   |        |
|             | 4.79    | 7.19    | 1.41    |        | 0.58    | 0.89    | 1.51    |        | 11.88   | 9.55    | -0.85   |        | 0.20    | 0.15    | -1.03   |        |
| Nicaragua   | (3.23,  | (5.84,  | (1.38,  | <0.001 | (0.15,  | (0.47,  | (1.46,  | <0.001 | (9.34,  | (8.00,  | (-1.38, | 0.002  | (0.01,  | (0.02,  | (-1.56, | <0.001 |
|             | 6.89)   | 8.76)   | 1.45)   |        | 1.62)   | 1.56)   | 1.57)   |        | 14.94)  | 11.32)  | -0.32)  |        | 1.08)   | 0.55)   | -0.50)  |        |

|                          |         |         |         |        |          |          |         |        |          |          |         |        |         |         |         |        |
|--------------------------|---------|---------|---------|--------|----------|----------|---------|--------|----------|----------|---------|--------|---------|---------|---------|--------|
|                          | 3.57    | 4.44    | 0.81    |        | 0.61     | 0.73     | 0.70    |        | 15.64    | 15.11    | -0.06   |        | 0.27    | 0.26    | -0.01   |        |
| Niger                    | (2.61,  | (3.78,  | (0.68,  | <0.001 | (0.26,   | (0.48,   | (0.64,  | <0.001 | (13.47,  | (13.82,  | (-0.35, | 0.671  | (0.06,  | (0.11,  | (-0.24, | 0.951  |
|                          | 4.81)   | 5.19)   | 0.94)   |        | 1.27)    | 1.09)    | 0.77)   |        | 18.09)   | 16.50)   | 0.23)   |        | 0.81)   | 0.51)   | 0.23)   |        |
|                          | 4.56    | 5.00    | 0.40    |        | 0.84     | 0.95     | 0.46    |        | 17.21    | 11.81    | -1.30   |        | 0.29    | 0.20    | -1.34   |        |
| Nigeria                  | (4.24,  | (4.78,  | (0.26,  | <0.001 | (0.71,   | (0.85,   | (0.28,  | <0.001 | (16.57,  | (11.45,  | (-1.46, | <0.001 | (0.21,  | (0.16,  | (-1.86, | <0.001 |
|                          | 4.90)   | 5.23)   | 0.55)   |        | 1.00)    | 1.05)    | 0.64)   |        | 17.88)   | 12.18)   | -1.15)  |        | 0.39)   | 0.26)   | -0.80)  |        |
|                          | 5.76    | 7.00    |         |        | 0.77     | 0.92     | 0.61    |        | 31.02    | 29.53    | -0.21   |        | 0.52    | 0.48    | -0.28   |        |
| Niue                     | (0.00,  | (0.00,  |         | <0.001 | (0.00,   | (0.00,   | (0.44,  | <0.001 | (0.00,   | (0.00,   | (-0.44, | 0.083  | (0.00,  | (0.00,  | (-0.61, | 0.106  |
|                          | 1042.35 | 1480.53 | 0.67    |        | 1032.73) | 1468.74) | 0.78)   |        | 1091.01) | 1523.08) | 0.03)   |        | 1032.30 | 1467.92 | 0.06)   |        |
|                          | )       | )       | 0.80)   |        |          |          |         |        |          |          |         |        | )       | )       |         |        |
|                          | 4.24    | 5.66    | 1.01    |        | 0.41     | 0.53     | 0.94    |        | 4.42     | 4.80     | 0.32    |        | 0.07    | 0.08    | 0.50    |        |
| North Macedonia          | (2.50,  | (3.59,  | (0.95,  | <0.001 | (0.04,   | (0.07,   | (0.76,  | <0.001 | (2.64,   | (2.93,   | (-0.79, | 0.575  | (0.00,  | (0.00,  | (-0.31, | 0.226  |
|                          | 6.74)   | 8.65)   | 1.07)   |        | 1.64)    | 2.09)    | 1.12)   |        | 6.96)    | 7.58)    | 1.44)   |        | 1.06)   | 1.41)   | 1.32)   |        |
|                          | 4.98    | 5.82    | 0.57    |        | 0.52     | 0.61     | 0.58    |        | 5.33     | 7.06     | 0.97    |        | 0.09    | 0.12    | 0.92    |        |
| Northern Mariana Islands | (0.01,  | (0.00,  | (0.44,  | <0.001 | (0.00,   | (0.00,   | (0.48,  | <0.001 | (0.02,   | (0.00,   | (0.85,  | <0.001 | (0.00,  | (0.00,  | (0.51,  | <0.001 |
|                          | 51.38)  | 89.20)  | 0.70)   |        | 44.09)   | 80.76)   | 0.68)   |        | 51.70)   | 91.27)   | 1.09)   |        | 43.34)  | 79.98)  | 1.34)   |        |
|                          | 10.78   | 7.71    | -1.14   |        | 1.42     | 1.14     | -0.73   |        | 4.68     | 5.85     | 0.80    |        | 0.08    | 0.10    | 0.64    |        |
| Norway                   | (8.66,  | (6.02,  | (-1.22, | <0.001 | (0.73,   | (0.56,   | (-0.79, | <0.001 | (3.34,   | (4.43,   | (0.13,  | 0.019  | (0.00,  | (0.00,  | (-0.27, | 0.170  |
|                          | 13.29)  | 9.75)   | -1.06)  |        | 2.52)    | 2.10)    | -0.67)  |        | 6.41)    | 7.63)    | 1.47)   |        | 0.65)   | 0.66)   | 1.55)   |        |
|                          | 6.02    | 8.07    | 1.02    |        | 0.99     | 1.27     | 0.86    |        | 10.34    | 9.75     | -0.16   |        | 0.17    | 0.16    | -0.19   |        |
| Oman                     | (4.09,  | (6.67,  | (0.99,  | <0.001 | (0.33,   | (0.75,   | (0.81,  | <0.001 | (7.73,   | (8.14,   | (-0.56, | 0.438  | (0.00,  | (0.02,  | (-0.77, | 0.521  |
|                          | 8.63)   | 9.81)   | 1.04)   |        | 2.41)    | 2.17)    | 0.91)   |        | 13.61)   | 11.70)   | 0.24)   |        | 1.21)   | 0.82)   | 0.39)   |        |
|                          | 3.67    | 5.19    | 1.22    |        | 0.35     | 0.48     | 1.09    |        | 11.99    | 19.60    | 1.72    |        | 0.21    | 0.33    | 1.59    |        |
| Pakistan                 | (3.41,  | (4.98,  | (1.06,  | <0.001 | (0.28,   | (0.42,   | (1.00,  | <0.001 | (11.50,  | (19.18,  | (1.57,  | <0.001 | (0.15,  | (0.28,  | (1.36,  | <0.001 |
|                          | 3.95)   | 5.41)   | 1.38)   |        | 0.45)    | 0.55)    | 1.18)   |        | 12.50)   | 20.02)   | 1.88)   |        | 0.29)   | 0.39)   | 1.82)   |        |
|                          | 4.93    | 5.70    | 0.53    |        | 0.64     | 0.73     | 0.46    |        | 17.11    | 16.69    | -0.10   |        | 0.29    | 0.28    | -0.19   |        |
| Palau                    | (0.00,  | (0.00,  | (0.46,  | <0.001 | (0.00,   | (0.00,   | (0.38,  | <0.001 | (0.06,   | (0.05,   | (-0.20, | 0.037  | (0.00,  | (0.00,  | (-0.40, | 0.066  |
|                          | 124.25) | 140.63) | 0.60)   |        | 116.13)  | 131.97)  | 0.54)   |        | 146.28)  | 159.14)  | -0.01)  |        | 115.46) | 131.12) | 0.01)   |        |
|                          | 6.45    | 8.00    | 0.76    |        | 0.87     | 1.03     | 0.60    |        | 9.43     | 5.69     | -1.77   |        | 0.16    | 0.09    | -1.96   |        |
| Palestine                | (4.03,  | (6.34,  | (0.66,  | <0.001 | (0.18,   | (0.50,   | (0.50,  | <0.001 | (6.46,   | (4.30,   | (-2.49, | <0.001 | (0.00,  | (0.00,  | (-2.98, | <0.001 |
|                          | 9.97)   | 10.00)  | 0.85)   |        | 2.88)    | 1.92)    | 0.71)   |        | 13.50)   | 7.41)    | -1.05)  |        | 1.83)   | 0.63)   | -0.94)  |        |
|                          | 5.27    | 8.30    | 1.57    |        | 0.59     | 0.91     | 1.49    |        | 16.95    | 21.26    | 0.86    |        | 0.28    | 0.35    | 0.83    |        |
| Panama                   | (3.42,  | (6.43,  | (1.53,  | <0.001 | (0.12,   | (0.37,   | (1.36,  | <0.001 | (13.53,  | (18.20,  | (0.22,  | 0.009  | (0.02,  | (0.07,  | (0.17,  | 0.014  |

|                     |        |         |        |        |        |        |         |        |         |         |         |        |        |        |         |        |
|---------------------|--------|---------|--------|--------|--------|--------|---------|--------|---------|---------|---------|--------|--------|--------|---------|--------|
|                     | 7.82)  | 10.56)  | 1.61)  |        | 1.85)  | 1.85)  | 1.62)   |        | 21.04)  | 24.69)  | 1.50)   |        | 1.38)  | 1.06)  | 1.49)   |        |
|                     | 3.79)  | 4.65)   | 0.73)  |        | 0.39)  | 0.47)  | 0.65)   |        | 13.40)  | 20.12)  | 1.34)   |        | 0.23)  | 0.34)  | 1.36)   |        |
| Papua New Guinea    | (2.57, | (3.76,  | (0.67, | <0.001 | (0.09, | (0.22, | (0.40,  | <0.001 | (10.96, | (18.20, | (1.13,  | <0.001 | (0.02, | (0.13, | (1.08,  | <0.001 |
|                     | 5.43)  | 5.70)   | 0.78)  |        | 1.18)  | 0.89)  | 0.91)   |        | 16.25)  | 22.18)  | 1.54)   |        | 0.95)  | 0.72)  | 1.63)   |        |
|                     | 4.95)  | 7.59)   | 1.49)  |        | 0.70)  | 1.04)  | 1.37)   |        | 13.62)  | 18.56)  | 1.17)   |        | 0.23)  | 0.31)  | 1.13)   |        |
| Paraguay            | (3.49, | (6.26,  | (1.43, | <0.001 | (0.25, | (0.59, | (1.30,  | <0.001 | (11.12, | (16.45, | (0.38,  | 0.004  | (0.02, | (0.09, | (0.32,  | 0.006  |
|                     | 6.83)  | 9.13)   | 1.54)  |        | 1.62)  | 1.70)  | 1.44)   |        | 16.54)  | 20.88)  | 1.97)   |        | 0.95)  | 0.75)  | 1.94)   |        |
|                     | 4.22)  | 6.95)   | 1.74)  |        | 0.55)  | 0.86)  | 1.54)   |        | 19.06)  | 12.98)  | -1.17)  |        | 0.31)  | 0.21)  | -1.19)  |        |
| Peru                | (3.61, | (6.34,  | (1.69, | <0.001 | (0.35, | (0.66, | (1.39,  | <0.001 | (17.77, | (12.14, | (-1.82, | <0.001 | (0.16, | (0.12, | (-2.13, | 0.014  |
|                     | 4.91)  | 7.60)   | 1.80)  |        | 0.83)  | 1.11)  | 1.69)   |        | 20.42)  | 13.86)  | -0.52)  |        | 0.54)  | 0.35)  | -0.24)  |        |
|                     | 4.13)  | 6.91)   | 1.81)  |        | 0.80)  | 1.01)  | 0.84)   |        | 10.14)  | 40.91)  | 4.98)   |        | 0.17)  | 0.69)  | 5.09)   |        |
| Philippines         | (3.78, | (6.57,  | (1.67, | <0.001 | (0.65, | (0.89, | (0.77,  | <0.001 | (9.58,  | (40.09, | (4.40,  | <0.001 | (0.11, | (0.59, | (4.68,  | <0.001 |
|                     | 4.51)  | 7.25)   | 1.95)  |        | 0.97)  | 1.15)  | 0.91)   |        | 10.73)  | 41.74)  | 5.56)   |        | 0.27)  | 0.81)  | 5.51)   |        |
|                     | 4.88)  | 5.66)   | 0.52)  |        | 0.77)  | 0.89)  | 0.52)   |        | 11.46)  | 16.05)  | 1.11)   |        | 0.20)  | 0.28)  | 1.19)   |        |
| Poland              | (4.38, | (5.09,  | (0.46, | <0.001 | (0.58, | (0.68, | (0.41,  | <0.001 | (10.71, | (15.12, | (0.73,  | <0.001 | (0.11, | (0.17, | (0.36,  | 0.005  |
|                     | 5.42)  | 6.28)   | 0.57)  |        | 1.00)  | 1.16)  | 0.64)   |        | 12.25)  | 17.02)  | 1.48)   |        | 0.33)  | 0.44)  | 2.04)   |        |
|                     | 5.36)  | 9.72)   | 2.06)  |        | 1.41)  | 1.54)  | 0.30)   |        | 13.10)  | 16.60)  | 0.81)   |        | 0.22)  | 0.28)  | 0.80)   |        |
| Portugal            | (4.36, | (8.23,  | (1.97, | <0.001 | (0.93, | (0.98, | (0.19,  | <0.001 | (11.51, | (14.63, | (-0.18, | 0.108  | (0.06, | (0.08, | (-0.17, | 0.105  |
|                     | 6.52)  | 11.43)  | 2.15)  |        | 2.07)  | 2.32)  | 0.40)   |        | 14.85)  | 18.78)  | 1.82)   |        | 0.56)  | 0.71)  | 1.79)   |        |
|                     | 7.01)  | 13.05)  | 2.14)  |        | 1.17)  | 1.67)  | 1.24)   |        | 27.50)  | 35.44)  | 0.80)   |        | 0.47)  | 0.61)  | 0.81)   |        |
| Puerto Rico         | (5.14, | (10.22, | (2.07, | <0.001 | (0.50, | (0.77, | (1.14,  | <0.001 | (23.63, | (30.66, | (-0.15, | 0.099  | (0.10, | (0.14, | (-0.16, | 0.102  |
|                     | 9.34)  | 16.43)  | 2.21)  |        | 2.33)  | 3.15)  | 1.33)   |        | 31.82)  | 40.76)  | 1.75)   |        | 1.37)  | 1.70)  | 1.79)   |        |
|                     | 6.77)  | 8.55)   | 0.82)  |        | 1.53)  | 1.42)  | -0.27)  |        | 9.26)   | 5.28)   | -1.93)  |        | 0.15)  | 0.09)  | -1.73)  |        |
| Qatar               | (3.26, | (6.76,  | (0.75, | <0.001 | (0.26, | (0.79, | (-0.34, | <0.001 | (4.99,  | (3.96,  | (-2.38, | <0.001 | (0.00, | (0.00, | (-2.58, | <0.001 |
|                     | 13.87) | 11.00)  | 0.89)  |        | 7.07)  | 2.88)  | -0.20)  |        | 17.00)  | 7.30)   | -1.47)  |        | 5.34)  | 1.34)  | -0.86)  |        |
|                     | 5.62)  | 5.89)   | 0.16)  |        | 1.72)  | 1.56)  | -0.38)  |        | 20.79)  | 5.68)   | -4.39)  |        | 0.35)  | 0.10)  | -4.23)  |        |
| Republic of Korea   | (5.18, | (5.41,  | (0.11, | <0.001 | (1.48, | (1.32, | (-0.53, | <0.001 | (19.93, | (5.22,  | (-4.62, | <0.001 | (0.24, | (0.04, | (-5.12, | <0.001 |
|                     | 6.09)  | 6.41)   | 0.21)  |        | 1.99)  | 1.85)  | -0.24)  |        | 21.67)  | 6.18)   | -4.15)  |        | 0.48)  | 0.19)  | -3.34)  |        |
|                     | 6.07)  | 8.89)   | 1.38)  |        | 0.66)  | 0.92)  | 1.21)   |        | 13.24)  | 19.32)  | 1.29)   |        | 0.23)  | 0.33)  | 1.32)   |        |
| Republic of Moldova | (4.54, | (6.80,  | (1.13, | <0.001 | (0.23, | (0.35, | (1.06,  | <0.001 | (10.95, | (16.25, | (0.89,  | <0.001 | (0.03, | (0.05, | (0.88,  | <0.001 |
|                     | 7.97)  | 11.52)  | 1.63)  |        | 1.51)  | 2.11)  | 1.35)   |        | 15.90)  | 22.91)  | 1.69)   |        | 0.89)  | 1.29)  | 1.76)   |        |
|                     | 5.62)  | 7.82)   | 1.15)  |        | 0.55)  | 0.73)  | 0.98)   |        | 6.17)   | 11.08)  | 2.03)   |        | 0.10)  | 0.19)  | 2.17)   |        |
| Romania             | (4.94, | (6.84,  | (1.11, | <0.001 | (0.35, | (0.45, | (0.83,  | <0.001 | (5.45,  | (9.90,  | (1.76,  | <0.001 | (0.03, | (0.06, | (1.76,  | <0.001 |

|                                  |        |         |         |        |        |        |         |        |         |         |         |        |        |        |         |        |
|----------------------------------|--------|---------|---------|--------|--------|--------|---------|--------|---------|---------|---------|--------|--------|--------|---------|--------|
|                                  | 6.38)  | 8.92)   | 1.19)   |        | 0.82)  | 1.12)  | 1.14)   |        | 6.97)   | 12.36)  | 2.31)   |        | 0.27)  | 0.43)  | 2.59)   |        |
|                                  | 6.22   | 14.20   | 2.87    |        | 0.64   | 1.25   | 2.34    |        | 23.85   | 72.92   | 4.11    |        | 0.40   | 1.27   | 4.24    |        |
| Russian Federation               | (5.94, | (13.73, | (2.65,  | <0.001 | (0.55, | (1.11, | (2.10,  | <0.001 | (23.30, | (71.90, | (2.33,  | <0.001 | (0.33, | (1.14, | (2.55,  | <0.001 |
|                                  | 6.51)  | 14.67)  | 3.08)   |        | 0.74)  | 1.40)  | 2.58)   |        | 24.41)  | 73.95)  | 5.91)   |        | 0.48)  | 1.41)  | 5.95)   |        |
|                                  | 5.64   | 5.32    | -0.18   |        | 0.84   | 0.90   | 0.27    |        | 37.47   | 27.86   | -1.00   |        | 0.63   | 0.47   | -0.99   |        |
| Rwanda                           | (4.40, | (4.47,  | (-0.32, | 0.018  | (0.41, | (0.57, | (0.13,  | <0.001 | (34.14, | (25.83, | (-1.24, | <0.001 | (0.27, | (0.24, | (-1.21, | <0.001 |
|                                  | 7.13)  | 6.30)   | -0.03)  |        | 1.55)  | 1.36)  | 0.40)   |        | 41.04)  | 30.00)  | -0.76)  |        | 1.29)  | 0.84)  | -0.77)  |        |
|                                  | 5.59   | 9.05    | 1.72    |        | 0.50   | 0.79   | 1.61    |        | 9.27    | 6.61    | -0.72   |        | 0.16   | 0.11   | -0.78   |        |
| Saint Kitts and Nevis            | (0.00, | (0.26,  | (1.60,  | <0.001 | (0.00, | (0.00, | (1.46,  | <0.001 | (0.08,  | (0.06,  | (-1.90, | 0.236  | (0.00, | (0.00, | (-2.36, | 0.337  |
|                                  | 62.37) | 52.48)  | 1.85)   |        | 53.25) | 38.03) | 1.76)   |        | 69.00)  | 48.41)  | 0.47)   |        | 52.63) | 36.74) | 0.82)   |        |
|                                  | 8.38   | 17.49   | 2.55    |        | 1.16   | 1.90   | 1.72    |        | 43.04   | 62.96   | 1.18    |        | 0.74   | 1.08   | 1.14    |        |
| Saint Lucia                      | (1.02, | (6.44,  | (2.49,  | <0.001 | (0.00, | (0.01, | (1.65,  | <0.001 | (20.75, | (39.28, | (0.95,  | <0.001 | (0.00, | (0.00, | (0.91,  | <0.001 |
|                                  | 32.95) | 38.56)  | 2.60)   |        | 21.37) | 15.28) | 1.78)   |        | 80.62)  | 96.08)  | 1.41)   |        | 20.73) | 13.81) | 1.37)   |        |
|                                  | 5.66   | 9.35    | 1.75    |        | 0.62   | 0.93   | 1.41    |        | 11.36   | 17.63   | 1.49    |        | 0.19   | 0.30   | 1.64    |        |
| Saint Vincent and the Grenadines | (0.24, | (1.11,  | (1.70,  | <0.001 | (0.00, | (0.00, | (1.25,  | <0.001 | (1.69,  | (4.51,  | (0.62,  | 0.001  | (0.00, | (0.00, | (0.94,  | <0.001 |
|                                  | 32.57) | 34.62)  | 1.81)   |        | 24.44) | 20.25) | 1.58)   |        | 41.49)  | 47.13)  | 2.36)   |        | 23.74) | 19.02) | 2.36)   |        |
|                                  | 4.88   | 6.02    | 0.74    |        | 0.67   | 0.79   | 0.57    |        | 20.21   | 29.72   | 1.35    |        | 0.34   | 0.50   | 1.37    |        |
| Samoa                            | (0.36, | (0.96,  | (0.71,  | <0.001 | (0.00, | (0.00, | (0.42,  | <0.001 | (7.54,  | (15.23, | (1.29,  | <0.001 | (0.00, | (0.00, | (1.29,  | <0.001 |
|                                  | 24.36) | 20.89)  | 0.77)   |        | 17.81) | 12.50) | 0.73)   |        | 46.09)  | 53.03)  | 1.41)   |        | 17.32) | 12.04) | 1.45)   |        |
|                                  | 6.36   | 8.01    | 0.80    |        | 1.37   | 1.29   | -0.21   |        | 8.39    | 9.69    | 0.50    |        | 0.14   | 0.17   | 0.63    |        |
| San Marino                       | (0.00, | (0.00,  | (0.78,  | <0.001 | (0.00, | (0.00, | (-0.26, | <0.001 | (0.00,  | (0.01,  | (0.33,  | <0.001 | (0.00, | (0.00, | (-0.10, | 0.093  |
|                                  | 98.16) | 93.75)  | 0.82)   |        | 88.50) | 80.93) | -0.16)  |        | 101.94) | 96.78)  | 0.66)   |        | 86.06) | 78.67) | 1.37)   |        |
|                                  | 3.87   | 5.47    | 1.22    |        | 0.77   | 0.98   | 0.85    |        | 14.67   | 17.05   | 0.65    |        | 0.26   | 0.28   | 0.51    |        |
| Sao Tome and Principe            | (0.03, | (0.84,  | (1.16,  | <0.001 | (0.00, | (0.00, | (0.72,  | <0.001 | (2.15,  | (6.93,  | (0.16,  | 0.010  | (0.00, | (0.00, | (-0.08, | 0.088  |
|                                  | 35.81) | 18.84)  | 1.27)   |        | 31.10) | 11.54) | 0.99)   |        | 53.44)  | 35.34)  | 1.14)   |        | 30.35) | 10.27) | 1.11)   |        |
|                                  | 6.64   | 9.19    | 1.14    |        | 1.01   | 1.31   | 0.89    |        | 9.22    | 10.75   | 0.48    |        | 0.16   | 0.19   | 0.56    |        |
| Saudi Arabia                     | (5.85, | (8.62,  | (1.09,  | <0.001 | (0.72, | (1.11, | (0.84,  | <0.001 | (8.27,  | (10.17, | (0.24,  | <0.001 | (0.06, | (0.12, | (0.07,  | 0.024  |
|                                  | 7.52)  | 9.80)   | 1.18)   |        | 1.39)  | 1.55)  | 0.95)   |        | 10.26)  | 11.37)  | 0.73)   |        | 0.35)  | 0.29)  | 1.05)   |        |
|                                  | 3.92   | 4.83    | 0.76    |        | 0.68   | 0.76   | 0.39    |        | 15.80   | 16.78   | 0.15    |        | 0.27   | 0.28   | 0.24    |        |
| Senegal                          | (2.89, | (4.06,  | (0.57,  | <0.001 | (0.29, | (0.47, | (0.19,  | <0.001 | (13.59, | (15.27, | (-1.07, | 0.815  | (0.05, | (0.12, | (-0.45, | 0.495  |
|                                  | 5.23)  | 5.71)   | 0.94)   |        | 1.38)  | 1.17)  | 0.59)   |        | 18.30)  | 18.40)  | 1.38)   |        | 0.83)  | 0.58)  | 0.94)   |        |
|                                  | 3.94   | 6.19    | 1.59    |        | 0.50   | 0.65   | 0.89    |        | 10.87   | 8.14    | -1.06   |        | 0.18   | 0.14   | -1.03   |        |
| Serbia                           | (3.07, | (4.99,  | (1.47,  | <0.001 | (0.23, | (0.30, | (0.63,  | <0.001 | (9.39,  | (6.76,  | (-1.26, | <0.001 | (0.04, | (0.02, | (-1.33, | <0.001 |

|                 |        |        |         |        |        |        |         |        |         |         |         |        |        |        |         |        |
|-----------------|--------|--------|---------|--------|--------|--------|---------|--------|---------|---------|---------|--------|--------|--------|---------|--------|
|                 | 4.99)  | 7.61)  | 1.70)   |        | 0.97)  | 1.23)  | 1.16)   |        | 12.52)  | 9.73)   | -0.87)  | 0.53)  | 0.52)  | -0.73) |         |        |
|                 | 8.00)  | 8.85)  | 0.33)   |        | 1.34)  | 1.39)  | 0.13)   |        | 53.16)  | 51.21)  | -0.07)  | 0.91)  | 0.86)  | -0.19) |         |        |
| Seychelles      | (0.35, | (1.02, | (0.27,  | <0.001 | (0.00, | (0.00, | (0.07,  | <0.001 | (22.94, | (25.82, | (-0.67, | 0.815  | (0.00, | (0.00, | (-0.77, | 0.540  |
|                 | 43.23) | 36.68) | 0.39)   |        | 32.08) | 25.05) | 0.18)   |        | 107.35) | 93.82)  | 0.53)   |        | 31.38) | 24.13) | 0.41)   |        |
|                 | 3.54)  | 4.39)  | 0.76)   |        | 0.64)  | 0.73)  | 0.45)   |        | 13.75)  | 14.22)  | 0.11)   |        | 0.23)  | 0.24)  | 0.08)   |        |
| Sierra Leone    | (2.22, | (3.43, | (0.71,  | <0.001 | (0.17, | (0.37, | (0.32,  | <0.001 | (10.94, | (12.40, | (-0.06, | 0.190  | (0.01, | (0.06, | (-0.12, | 0.420  |
|                 | 5.40)  | 5.55)  | 0.80)   |        | 1.71)  | 1.32)  | 0.58)   |        | 17.08)  | 16.24)  | 0.28)   |        | 1.11)  | 0.67)  | 0.29)   |        |
|                 | 4.54)  | 6.59)  | 1.24)   |        | 1.30)  | 1.23)  | -0.21)  |        | 9.30)   | 10.61)  | 0.44)   |        | 0.16)  | 0.18)  | 0.34)   |        |
| Singapore       | (3.16, | (5.13, | (0.89,  | <0.001 | (0.63, | (0.65, | (-0.43, | 0.065  | (7.29,  | (8.75,  | (0.12,  | 0.006  | (0.01, | (0.02, | (-0.67, | 0.512  |
|                 | 6.33)  | 8.41)  | 1.59)   |        | 2.42)  | 2.23)  | 0.01)   |        | 11.71)  | 12.83)  | 0.75)   |        | 0.83)  | 0.84)  | 1.36)   |        |
|                 | 6.18)  | 7.40)  | 0.61)   |        | 0.68)  | 0.76)  | 0.37)   |        | 9.25)   | 8.21)   | -0.58)  |        | 0.16)  | 0.14)  | -0.60)  |        |
| Slovakia        | (4.77, | (5.75, | (0.52,  | <0.001 | (0.28, | (0.31, | (0.21,  | <0.001 | (7.51,  | (6.51,  | (-1.32, | 0.131  | (0.01, | (0.01, | (-1.39, | 0.132  |
|                 | 7.90)  | 9.44)  | 0.70)   |        | 1.42)  | 1.67)  | 0.53)   |        | 11.29)  | 10.31)  | 0.17)   |        | 0.67)  | 0.80)  | 0.18)   |        |
|                 | 5.27)  | 5.91)  | 0.39)   |        | 0.70)  | 0.69)  | -0.04)  |        | 8.07)   | 5.36)   | -1.40)  |        | 0.14)  | 0.09)  | -1.46)  |        |
| Slovenia        | (3.25, | (3.52, | (0.26,  | <0.001 | (0.13, | (0.09, | (-0.29, | 0.777  | (5.55,  | (3.12,  | (-2.27, | 0.002  | (0.00, | (0.00, | (-2.99, | 0.065  |
|                 | 8.14)  | 9.52)  | 0.51)   |        | 2.23)  | 2.77)  | 0.22)   |        | 11.42)  | 8.82)   | -0.52)  |        | 1.35)  | 1.84)  | 0.09)   |        |
|                 | 4.08)  | 5.05)  | 0.75)   |        | 0.39)  | 0.47)  | 0.66)   |        | 20.98)  | 33.67)  | 1.65)   |        | 0.36)  | 0.58)  | 1.68)   |        |
| Solomon Islands | (0.65, | (1.92, | (0.68,  | <0.001 | (0.00, | (0.00, | (0.33,  | <0.001 | (10.68, | (24.16, | (1.47,  | <0.001 | (0.00, | (0.00, | (1.52,  | <0.001 |
|                 | 14.66) | 10.94) | 0.82)   |        | 8.91)  | 4.15)  | 1.00)   |        | 37.75)  | 45.77)  | 1.82)   |        | 8.92)  | 4.36)  | 1.84)   |        |
|                 | 4.51)  | 4.71)  | 0.16)   |        | 0.69)  | 0.74)  | 0.28)   |        | 28.10)  | 25.97)  | -0.25)  |        | 0.48)  | 0.44)  | -0.25)  |        |
| Somalia         | (3.38, | (4.04, | (0.10,  | <0.001 | (0.30, | (0.49, | (0.11,  | 0.001  | (25.13, | (24.34, | (-0.40, | 0.001  | (0.16, | (0.25, | (-0.52, | 0.070  |
|                 | 5.92)  | 5.46)  | 0.21)   |        | 1.38)  | 1.08)  | 0.46)   |        | 31.35)  | 27.69)  | -0.10)  |        | 1.10)  | 0.72)  | 0.02)   |        |
|                 | 6.22)  | 6.25)  | 0.03)   |        | 1.46)  | 1.43)  | -0.07)  |        | 44.48)  | 32.50)  | -1.15)  |        | 0.76)  | 0.55)  | -1.21)  |        |
| South Africa    | (5.66, | (5.81, | (-0.03, | 0.268  | (1.21, | (1.22, | (-0.14, | 0.022  | (42.95, | (31.51, | (-1.75, | <0.001 | (0.57, | (0.43, | (-1.88, | <0.001 |
|                 | 6.82)  | 6.71)  | 0.09)   |        | 1.76)  | 1.66)  | -0.01)  |        | 46.06)  | 33.52)  | -0.56)  |        | 1.00)  | 0.70)  | -0.54)  |        |
|                 | 4.75)  | 4.71)  | 0.01)   |        | 0.90)  | 0.92)  | 0.11)   |        | 23.25)  | 17.10)  | -0.98)  |        | 0.40)  | 0.29)  | -1.11)  |        |
| South Sudan     | (3.56, | (3.64, | (-0.13, | 0.869  | (0.43, | (0.49, | (-0.02, | 0.089  | (20.41, | (14.95, | (-1.47, | <0.001 | (0.11, | (0.07, | (-1.50, | <0.001 |
|                 | 6.27)  | 6.01)  | 0.16)   |        | 1.73)  | 1.61)  | 0.23)   |        | 26.40)  | 19.49)  | -0.49)  |        | 1.07)  | 0.79)  | -0.71)  |        |
|                 | 5.87)  | 7.78)  | 0.97)   |        | 1.07)  | 1.13)  | 0.19)   |        | 11.06)  | 9.36)   | -0.74)  |        | 0.18)  | 0.16)  | -0.55)  |        |
| Spain           | (5.33, | (7.12, | (0.96,  | <0.001 | (0.85, | (0.88, | (0.16,  | <0.001 | (10.32, | (8.64,  | (-1.29, | 0.008  | (0.10, | (0.08, | (-1.23, | 0.117  |
|                 | 6.45)  | 8.48)  | 0.99)   |        | 1.34)  | 1.42)  | 0.23)   |        | 11.85)  | 10.13)  | -0.19)  |        | 0.31)  | 0.29)  | 0.14)   |        |
|                 | 8.00)  | 9.40)  | 0.52)   |        | 1.48)  | 1.64)  | 0.34)   |        | 57.34)  | 56.36)  | -0.01)  |        | 0.97)  | 0.96)  | 0.01)   |        |
| Sri Lanka       | (7.10, | (8.47, | (0.42,  | <0.001 | (1.11, | (1.27, | (0.27,  | <0.001 | (54.90, | (54.03, | (-1.58, | 0.995  | (0.68, | (0.68, | (-1.51, | 0.986  |



|                            |        |         |        |        |        |        |         |        |         |         |         |        |        |        |         |        |
|----------------------------|--------|---------|--------|--------|--------|--------|---------|--------|---------|---------|---------|--------|--------|--------|---------|--------|
|                            | 8.98)  | 10.41)  | 0.62)  |        | 1.93)  | 2.10)  | 0.41)   |        | 59.86)  | 58.76)  | 1.60)   |        | 1.36)  | 1.32)  | 1.56)   |        |
|                            | 5.66   | 7.12    | 0.81   |        | 0.65   | 0.81   | 0.77    |        | 13.69   | 10.00   | -1.08   |        | 0.23   | 0.17   | -1.05   |        |
| Sudan                      | (4.89, | (6.54,  | (0.74, | <0.001 | (0.41, | (0.63, | (0.72,  | <0.001 | (12.46, | (9.32,  | (-1.31, | <0.001 | (0.10, | (0.09, | (-1.37, | <0.001 |
|                            | 6.53)  | 7.73)   | 0.87)  |        | 0.99)  | 1.04)  | 0.81)   |        | 15.02)  | 10.73)  | -0.85)  |        | 0.48)  | 0.29)  | -0.74)  |        |
|                            | 5.04   | 8.46    | 1.82   |        | 0.55   | 0.85   | 1.57    |        | 14.48   | 18.27   | 0.83    |        | 0.25   | 0.31   | 0.72    |        |
| Suriname                   | (1.31, | (3.86,  | (1.75, | <0.001 | (0.00, | (0.02, | (1.40,  | <0.001 | (7.12,  | (11.06, | (-0.78, | 0.314  | (0.00, | (0.00, | (-1.03, | 0.420  |
|                            | 14.25) | 16.16)  | 1.89)  |        | 7.52)  | 5.24)  | 1.75)   |        | 26.93)  | 28.48)  | 2.47)   |        | 7.05)  | 4.28)  | 2.51)   |        |
|                            | 7.04   | 8.88    | 0.82   |        | 1.28   | 1.15   | -0.37   |        | 3.14    | 5.13    | 1.76    |        | 0.05   | 0.09   | 2.00    |        |
| Sweden                     | (5.77, | (7.51,  | (0.76, | <0.001 | (0.77, | (0.69, | (-0.47, | <0.001 | (2.32,  | (4.12,  | (1.34,  | <0.001 | (0.00, | (0.01, | (0.81,  | 0.001  |
|                            | 8.52)  | 10.44)  | 0.88)  |        | 2.00)  | 1.81)  | -0.26)  |        | 4.17)   | 6.34)   | 2.17)   |        | 0.37)  | 0.42)  | 3.20)   |        |
|                            | 6.53   | 7.64    | 0.52   |        | 1.51   | 1.29   | -0.57   |        | 9.52    | 11.47   | 0.48    |        | 0.16   | 0.20   | 0.62    |        |
| Switzerland                | (5.25, | (6.29,  | (0.45, | <0.001 | (0.94, | (0.77, | (-0.73, | <0.001 | (7.99,  | (9.85,  | (-0.21, | 0.172  | (0.02, | (0.04, | (-0.28, | 0.178  |
|                            | 8.07)  | 9.24)   | 0.59)  |        | 2.35)  | 2.06)  | -0.41)  |        | 11.30)  | 13.32)  | 1.17)   |        | 0.62)  | 0.65)  | 1.52)   |        |
|                            | 6.35   | 8.53    | 1.04   |        | 0.66   | 0.87   | 0.99    |        | 8.04    | 5.29    | -1.40   |        | 0.14   | 0.09   | -1.47   |        |
| Syrian Arab Republic       | (5.34, | (7.29,  | (1.00, | <0.001 | (0.36, | (0.51, | (0.88,  | <0.001 | (6.86,  | (4.32,  | (-1.61, | <0.001 | (0.03, | (0.01, | (-1.99, | <0.001 |
|                            | 7.53)  | 9.95)   | 1.08)  |        | 1.13)  | 1.44)  | 1.10)   |        | 9.37)   | 6.45)   | -1.18)  |        | 0.45)  | 0.43)  | -0.94)  |        |
|                            | 6.30   | 7.59    | 0.64   |        | 1.72   | 2.02   | 0.56    |        | 8.47    | 27.14   | 4.21    |        | 0.14   | 0.47   | 4.46    |        |
| Taiwan (Province of China) | (5.61, | (6.77,  | (0.57, | <0.001 | (1.37, | (1.61, | (0.48,  | <0.001 | (7.67,  | (25.62, | (3.43,  | <0.001 | (0.06, | (0.29, | (3.34,  | <0.001 |
|                            | 7.06)  | 8.49)   | 0.71)  |        | 2.14)  | 2.51)  | 0.63)   |        | 9.34)   | 28.75)  | 5.00)   |        | 0.30)  | 0.73)  | 5.59)   |        |
|                            | 3.81   | 4.45    | 0.56   |        | 0.39   | 0.44   | 0.51    |        | 4.87    | 6.24    | 0.86    |        | 0.08   | 0.11   | 0.96    |        |
| Tajikistan                 | (2.68, | (3.57,  | (0.48, | <0.001 | (0.10, | (0.20, | (0.39,  | <0.001 | (3.56,  | (5.20,  | (0.52,  | <0.001 | (0.00, | (0.01, | (0.06,  | 0.036  |
|                            | 5.30)  | 5.48)   | 0.64)  |        | 1.10)  | 0.85)  | 0.63)   |        | 6.55)   | 7.44)   | 1.21)   |        | 0.65)  | 0.39)  | 1.87)   |        |
|                            | 9.25   | 11.30   | 0.66   |        | 3.27   | 3.69   | 0.43    |        | 83.47   | 100.00  | 0.79    |        | 1.43   | 1.68   | 0.74    |        |
| Thailand                   | (8.72, | (10.71, | (0.58, | <0.001 | (2.96, | (3.36, | (0.42,  | <0.001 | (81.86, | (98.24, | (0.10,  | 0.024  | (1.22, | (1.46, | (0.01,  | 0.046  |
|                            | 9.81)  | 11.91)  | 0.74)  |        | 3.61)  | 4.05)  | 0.44)   |        | 85.11)  | 101.79) | 1.48)   |        | 1.66)  | 1.93)  | 1.47)   |        |
|                            | 3.94   | 5.77    | 1.36   |        | 0.72   | 0.99   | 1.13    |        | 16.03   | 23.97   | 1.54    |        | 0.27   | 0.40   | 1.44    |        |
| Timor-Leste                | (1.47, | (3.09,  | (1.26, | <0.001 | (0.03, | (0.15, | (1.03,  | <0.001 | (10.34, | (18.11, | (0.75,  | <0.001 | (0.00, | (0.01, | (0.74,  | <0.001 |
|                            | 8.76)  | 10.07)  | 1.45)  |        | 4.09)  | 3.71)  | 1.24)   |        | 23.91)  | 31.35)  | 2.35)   |        | 3.36)  | 2.82)  | 2.14)   |        |
|                            | 4.02   | 4.83    | 0.65   |        | 0.66   | 0.74   | 0.45    |        | 17.72   | 16.18   | -0.30   |        | 0.30   | 0.27   | -0.34   |        |
| Togo                       | (2.58, | (3.78,  | (0.58, | <0.001 | (0.18, | (0.37, | (0.35,  | <0.001 | (14.41, | (14.14, | (-0.48, | 0.001  | (0.03, | (0.07, | (-0.83, | 0.172  |
|                            | 6.06)  | 6.11)   | 0.71)  |        | 1.84)  | 1.36)  | 0.56)   |        | 21.64)  | 18.43)  | -0.12)  |        | 1.34)  | 0.74)  | 0.15)   |        |
|                            | 5.00   | 6.16    | 0.72   |        | 0.71   | 0.86   | 0.66    |        | 19.99   | 25.72   | 0.86    |        | 0.34   | 0.43   | 0.81    |        |
| Tokelau                    | (0.00, | (0.00,  | (0.70, | <0.001 | (0.00, | (0.00, | (0.62,  | <0.001 | (0.00,  | (0.00,  | (0.80,  | <0.001 | (0.00, | (0.00, | (0.64,  | <0.001 |

|                         |         |         |         |        |          |          |         |        |          |          |         |        |          |          |         |        |
|-------------------------|---------|---------|---------|--------|----------|----------|---------|--------|----------|----------|---------|--------|----------|----------|---------|--------|
|                         | 1593.02 | 1811.14 | 0.74)   |        | 1585.08) | 1801.39) | 0.70)   |        | 1621.00) | 1846.75) | 0.92)   |        | 1584.44) | 1800.63) | 0.98)   |        |
|                         | )       | )       |         |        |          |          |         |        |          |          |         |        | )        | )        |         |        |
|                         | 4.96    | 5.96    | 0.66    |        | 0.88     | 1.00     | 0.42    |        | 12.33    | 21.70    | 2.00    |        | 0.21     | 0.36     | 1.87    |        |
| Tonga                   | (0.05,  | (0.18,  | (0.57,  | <0.001 | (0.00,   | (0.00,   | (0.40,  | <0.001 | (1.36,   | (5.73,   | (1.82,  | <0.001 | (0.00,   | (0.00,   | (1.66,  | <0.001 |
|                         | 41.86)  | 34.83)  | 0.75)   |        | 35.48)   | 26.28)   | 0.44)   |        | 53.20)   | 58.63)   | 2.17)   |        | 34.49)   | 25.17)   | 2.08)   |        |
|                         | 6.39    | 10.50   | 1.73    |        | 0.71     | 1.05     | 1.37    |        | 24.07    | 24.59    | 0.12    |        | 0.42     | 0.43     | 0.33    |        |
| Trinidad and<br>Tobago  | (3.63,  | (6.99,  | (1.69,  | <0.001 | (0.07,   | (0.20,   | (1.27,  | <0.001 | (18.30,  | (19.14,  | (-0.60, | 0.751  | (0.01,   | (0.02,   | (-0.43, | 0.394  |
|                         | 10.49)  | 15.32)  | 1.76)   |        | 2.88)    | 3.43)    | 1.47)   |        | 31.12)   | 31.28)   | 0.84)   |        | 2.42)    | 2.46)    | 1.10)   |        |
|                         | 6.05    | 8.46    | 1.17    |        | 0.89     | 1.14     | 0.87    |        | 8.33     | 8.31     | -0.02   |        | 0.14     | 0.14     | -0.03   |        |
| Tunisia                 | (4.91,  | (7.29,  | (1.13,  | <0.001 | (0.49,   | (0.74,   | (0.80,  | <0.001 | (6.97,   | (7.16,   | (-0.10, | 0.636  | (0.02,   | (0.03,   | (-0.49, | 0.883  |
|                         | 7.39)   | 9.77)   | 1.20)   |        | 1.51)    | 1.69)    | 0.94)   |        | 9.90)    | 9.61)    | 0.06)   |        | 0.52)    | 0.42)    | 0.43)   |        |
|                         | 9.22    | 9.09    | -0.06   |        | 1.52     | 1.41     | -0.27   |        | 20.41    | 8.47     | -2.99   |        | 0.35     | 0.14     | -3.11   |        |
| Turkey                  | (8.68,  | (8.65,  | (-0.10, | 0.007  | (1.30,   | (1.24,   | (-0.36, | <0.001 | (19.60,  | (8.05,   | (-3.45, | <0.001 | (0.25,   | (0.09,   | (-3.66, | <0.001 |
|                         | 9.78)   | 9.54)   | -0.02)  |        | 1.76)    | 1.59)    | -0.17)  |        | 21.24)   | 8.91)    | -2.53)  |        | 0.47)    | 0.21)    | -2.56)  |        |
|                         | 3.67    | 4.45    | 0.68    |        | 0.30     | 0.37     | 0.80    |        | 3.39     | 10.85    | 4.22    |        | 0.06     | 0.18     | 4.11    |        |
| Turkmenistan            | (2.41,  | (3.29,  | (0.56,  | <0.001 | (0.04,   | (0.10,   | (0.62,  | <0.001 | (2.17,   | (8.99,   | (3.53,  | <0.001 | (0.00,   | (0.02,   | (3.16,  | <0.001 |
|                         | 5.42)   | 5.91)   | 0.80)   |        | 1.14)    | 0.97)    | 0.99)   |        | 5.10)    | 12.99)   | 4.91)   |        | 0.76)    | 0.69)    | 5.07)   |        |
|                         | 4.84    | 6.11    | 0.81    |        | 0.60     | 0.73     | 0.69    |        | 26.82    | 40.82    | 1.45    |        | 0.45     | 0.69     | 1.45    |        |
| Tuvalu                  | (0.00,  | (0.00,  | (0.79,  | <0.001 | (0.00,   | (0.00,   | (0.62,  | <0.001 | (0.01,   | (1.08,   | (1.35,  | <0.001 | (0.00,   | (0.00,   | (1.29,  | <0.001 |
|                         | 255.81) | 176.93) | 0.82)   |        | 247.63)  | 166.75)  | 0.75)   |        | 296.75)  | 238.16)  | 1.55)   |        | 247.37)  | 166.69)  | 1.62)   |        |
|                         | 4.32    | 5.22    | 0.69    |        | 0.86     | 0.95     | 0.35    |        | 20.92    | 28.45    | 0.98    |        | 0.36     | 0.48     | 0.91    |        |
| Uganda                  | (3.58,  | (4.70,  | (0.62,  | <0.001 | (0.55,   | (0.74,   | (0.26,  | <0.001 | (19.21,  | (27.18,  | (0.55,  | <0.001 | (0.16,   | (0.33,   | (0.54,  | <0.001 |
|                         | 5.18)   | 5.80)   | 0.76)   |        | 1.31)    | 1.22)    | 0.43)   |        | 22.77)   | 29.78)   | 1.41)   |        | 0.69)    | 0.69)    | 1.27)   |        |
|                         | 6.01    | 13.40   | 2.86    |        | 0.58     | 1.14     | 2.40    |        | 17.75    | 54.83    | 3.83    |        | 0.31     | 0.95     | 3.82    |        |
| Ukraine                 | (5.53,  | (12.58, | (2.60,  | <0.001 | (0.44,   | (0.91,   | (2.17,  | <0.001 | (16.93,  | (53.22,  | (1.60,  | 0.001  | (0.21,   | (0.75,   | (1.70,  | <0.001 |
|                         | 6.52)   | 14.26)  | 3.12)   |        | 0.76)    | 1.42)    | 2.63)   |        | 18.60)   | 56.49)   | 6.11)   |        | 0.44)    | 1.20)    | 5.98)   |        |
|                         | 6.84    | 8.46    | 0.73    |        | 1.02     | 1.17     | 0.49    |        | 11.94    | 13.10    | 0.34    |        | 0.20     | 0.22     | 0.19    |        |
| United Arab<br>Emirates | (4.88,  | (7.09,  | (0.69,  | <0.001 | (0.38,   | (0.71,   | (0.42,  | <0.001 | (9.34,   | (11.46,  | (0.16,  | <0.001 | (0.01,   | (0.06,   | (-0.14, | 0.263  |
|                         | 9.56)   | 10.08)  | 0.77)   |        | 2.58)    | 1.94)    | 0.57)   |        | 15.28)   | 14.99)   | 0.52)   |        | 1.51)    | 0.73)    | 0.51)   |        |
|                         | 8.09    | 7.63    | -0.24   |        | 1.02     | 1.08     | 0.19    |        | 4.69     | 10.31    | 2.85    |        | 0.08     | 0.18     | 3.08    |        |
| United Kingdom          | (7.56,  | (7.13,  | (-0.35, | <0.001 | (0.84,   | (0.90,   | (0.01,  | 0.042  | (4.28,   | (9.74,   | (2.20,  | <0.001 | (0.03,   | (0.11,   | (1.84,  | <0.001 |
|                         | 8.66)   | 8.16)   | -0.13)  |        | 1.23)    | 1.29)    | 0.37)   |        | 5.12)    | 10.91)   | 3.50)   |        | 0.16)    | 0.28)    | 4.33)   |        |
| United Republic of      | 4.97    | 5.05    | 0.07    | 0.143  | 0.88     | 0.98     | 0.40    | <0.001 | 29.56    | 22.93    | -0.86   | <0.001 | 0.50     | 0.38     | -0.92   | <0.001 |

|                                    |               |               |                |        |               |               |               |                |                |                |                |              |               |                |                |
|------------------------------------|---------------|---------------|----------------|--------|---------------|---------------|---------------|----------------|----------------|----------------|----------------|--------------|---------------|----------------|----------------|
| Tanzania                           | (4.32, 5.71)  | (4.61, 5.51)  | (-0.02, 0.17)  |        | (0.62, 1.22)  | (0.79, 1.20)  | (0.29, 0.50)  | (27.90, 31.30) | (21.98, 23.91) | (-1.04, -0.68) |                | (0.30, 0.78) | (0.27, 0.53)  | (-1.19, -0.65) |                |
|                                    | 6.48          | 6.18          | -0.13          |        | 2.28          | 2.53          | 0.40          | 9.84           | 14.82          | 1.47           |                | 0.17         | 0.26          | 1.42           |                |
| United States of America           | (6.26, 6.70)  | (5.98, 6.39)  | (-0.20, -0.05) | 0.001  | (2.15, 2.41)  | (2.40, 2.67)  | (0.23, 0.56)  | <0.001         | (9.58, 10.11)  | (14.50, 15.13) | (1.01, 1.93)   | <0.001       | (0.14, 0.21)  | (0.22, 0.30)   | (0.86, 1.98)   |
|                                    | 7.63          | 14.70         | 2.26           |        | 0.91          | 1.48          | 1.70          |                | 43.13          | 31.68          | -0.74          |              | 0.73          | 0.54           | -1.03          |
| United States Virgin Islands       | (0.48, 35.19) | (2.01, 52.57) | (2.13, 2.38)   | <0.001 | (0.00, 23.46) | (0.00, 30.54) | (1.61, 1.79)  | <0.001         | (18.53, 86.05) | (9.80, 77.41)  | (-2.34, 0.89)  | 0.369        | (0.00, 23.14) | (0.00, 28.75)  | (-1.36, -0.70) |
|                                    | 4.99          | 9.39          | 2.21           |        | 1.11          | 1.56          | 1.18          |                | 15.62          | 20.88          | 1.02           |              | 0.27          | 0.36           | 1.01           |
| Uruguay                            | (3.32, 7.23)  | (7.10, 12.19) | (2.17, 2.25)   | <0.001 | (0.42, 2.40)  | (0.72, 2.93)  | (1.11, 1.25)  | <0.001         | (12.50, 19.29) | (17.40, 24.86) | (0.72, 1.33)   | <0.001       | (0.02, 1.17)  | (0.05, 1.26)   | (0.66, 1.35)   |
|                                    | 3.32          | 4.27          | 0.89           |        | 0.32          | 0.41          | 0.84          |                | 4.46           | 10.25          | 2.97           |              | 0.07          | 0.17           | 2.83           |
| Uzbekistan                         | (2.78, 3.93)  | (3.81, 4.78)  | (0.82, 0.96)   | <0.001 | (0.17, 0.55)  | (0.27, 0.58)  | (0.66, 1.01)  | <0.001         | (3.83, 5.16)   | (9.52, 11.02)  | (2.55, 3.39)   | <0.001       | (0.02, 0.23)  | (0.09, 0.30)   | (2.52, 3.15)   |
|                                    | 4.80          | 5.69          | 0.60           |        | 0.52          | 0.59          | 0.49          |                | 22.73          | 39.22          | 1.89           |              | 0.39          | 0.66           | 1.82           |
| Vanuatu                            | (0.27, 23.77) | (1.26, 16.72) | (0.54, 0.67)   | <0.001 | (0.00, 16.52) | (0.00, 8.65)  | (0.27, 0.71)  | <0.001         | (8.46, 50.06)  | (24.51, 59.88) | (1.66, 2.11)   | <0.001       | (0.00, 16.31) | (0.00, 8.80)   | (1.55, 2.09)   |
| Venezuela (Bolivarian Republic of) | 5.08          | 6.70          | 0.97           |        | 0.48          | 0.64          | 1.01          |                | 10.53          | 7.87           | -0.90          |              | 0.17          | 0.13           | -0.85          |
|                                    | (4.39, 5.85)  | (6.01, 7.44)  | (0.93, 1.01)   | <0.001 | (0.29, 0.76)  | (0.44, 0.90)  | (0.94, 1.09)  | <0.001         | (9.53, 11.61)  | (7.13, 8.67)   | (-1.77, -0.01) | 0.047        | (0.07, 0.37)  | (0.05, 0.28)   | (-1.68, -0.00) |
|                                    | 5.80          | 7.45          | 0.86           |        | 1.40          | 1.74          | 0.75          |                | 33.19          | 32.50          | -0.07          |              | 0.57          | 0.55           | -0.12          |
| Viet Nam                           | (5.39, 6.24)  | (7.08, 7.84)  | (0.84, 0.89)   | <0.001 | (1.21, 1.62)  | (1.56, 1.93)  | (0.69, 0.81)  | <0.001         | (32.19, 34.21) | (31.73, 33.29) | (-0.16, 0.02)  | 0.126        | (0.44, 0.72)  | (0.45, 0.66)   | (-0.37, 0.13)  |
|                                    | 5.41          | 7.02          | 0.92           |        | 0.61          | 0.76          | 0.76          |                | 7.59           | 8.65           | 0.53           |              | 0.13          | 0.15           | 0.50           |
| Yemen                              | (4.47, 6.51)  | (6.39, 7.71)  | (0.87, 0.97)   | <0.001 | (0.32, 1.06)  | (0.56, 1.01)  | (0.64, 0.89)  | <0.001         | (6.42, 8.91)   | (7.94, 9.42)   | (0.24, 0.82)   | <0.001       | (0.02, 0.43)  | (0.07, 0.28)   | (-0.16, 1.15)  |
|                                    | 4.05          | 5.13          | 0.84           |        | 0.71          | 0.86          | 0.68          |                | 21.53          | 27.38          | 0.82           |              | 0.36          | 0.46           | 0.83           |
| Zambia                             | (3.02, 5.35)  | (4.41, 5.95)  | (0.78, 0.89)   | <0.001 | (0.33, 1.41)  | (0.58, 1.24)  | (0.61, 0.75)  | <0.001         | (19.01, 24.32) | (25.64, 29.22) | (0.65, 0.99)   | <0.001       | (0.10, 0.95)  | (0.26, 0.77)   | (0.57, 1.08)   |
|                                    | 4.36          | 4.91          | 0.43           |        | 0.55          | 0.56          | 0.10          |                | 11.59          | 17.98          | 1.55           |              | 0.19          | 0.29           | 1.47           |
| Zimbabwe                           | (3.43, 5.48)  | (4.13, 5.80)  | (0.36, 0.49)   | <0.001 | (0.26, 1.05)  | (0.32, 0.92)  | (-0.16, 0.36) | 0.459          | (10.08, 13.30) | (16.47, 19.59) | (0.92, 2.19)   | <0.001       | (0.04, 0.57)  | (0.13, 0.57)   | (0.80, 2.15)   |

Other

**cardiovascular  
and circulatory  
diseases  
Overall**

|                     |   |   |   |   |          |          |         |        |          |          |         |        |        |        |         |        |
|---------------------|---|---|---|---|----------|----------|---------|--------|----------|----------|---------|--------|--------|--------|---------|--------|
|                     |   |   |   |   | 235.55   | 265.14   | 0.41    |        | 122.43   | 116.52   | -0.11   |        | 1.88   | 1.76   | -0.16   |        |
| Afghanistan         | — | — | — | — | (230.50, | (262.49, | (0.37,  | <0.001 | (118.47, | (114.63, | (-0.28, | 0.203  | (1.41, | (1.53, | (-0.34, | 0.089  |
|                     |   |   |   |   | 240.70)  | 267.81)  | 0.44)   |        | 126.50)  | 118.44)  | 0.06)   |        | 2.48)  | 2.01)  | 0.02)   |        |
|                     |   |   |   |   | 618.00   | 640.89   | 0.13    |        | 91.76    | 102.54   | 0.38    |        | 0.97   | 1.12   | 0.48    |        |
| Albania             | — | — | — | — | (605.22, | (625.00, | (0.11,  | <0.001 | (86.81,  | (96.26,  | (0.00,  | 0.049  | (0.52, | (0.56, | (-0.08, | 0.091  |
|                     |   |   |   |   | 631.00)  | 657.10)  | 0.15)   |        | 96.93)   | 109.13)  | 0.76)   |        | 1.67)  | 2.03)  | 1.04)   |        |
|                     |   |   |   |   | 372.87   | 397.37   | 0.22    |        | 96.63    | 73.34    | -0.95   |        | 1.28   | 0.87   | -1.25   |        |
| Algeria             | — | — | — | — | (369.04, | (394.35, | (0.19,  | <0.001 | (94.64,  | (72.06,  | (-1.13, | <0.001 | (1.06, | (0.74, | (-1.51, | <0.001 |
|                     |   |   |   |   | 376.74)  | 400.40)  | 0.24)   |        | 98.66)   | 74.63)   | -0.77)  |        | 1.55)  | 1.03)  | -1.00)  |        |
|                     |   |   |   |   | 181.29   | 187.78   | 0.12    |        | 61.99    | 65.21    | 0.20    |        | 0.88   | 0.93   | 0.22    |        |
| American Samoa      | — | — | — | — | (127.95, | (134.32, | (0.11,  | <0.001 | (31.98,  | (34.43,  | (-0.03, | 0.086  | (0.00, | (0.00, | (-0.09, | 0.164  |
|                     |   |   |   |   | 251.44)  | 257.75)  | 0.13)   |        | 110.28)  | 114.17)  | 0.44)   |        | 24.88) | 25.03) | 0.54)   |        |
|                     |   |   |   |   | 212.91   | 207.46   | -0.09   |        | 31.72    | 26.62    | -0.60   |        | 0.35   | 0.26   | -0.91   |        |
| Andorra             | — | — | — | — | (159.65, | (154.10, | (-0.18, | 0.039  | (13.75,  | (10.53,  | (-0.66, | <0.001 | (0.00, | (0.00, | (-1.07, | <0.001 |
|                     |   |   |   |   | 280.32)  | 274.78)  | -0.00)  |        | 65.39)   | 57.93)   | -0.54)  |        | 21.00) | 19.70) | -0.76)  |        |
|                     |   |   |   |   | 452.35   | 536.84   | 0.61    |        | 85.85    | 79.02    | -0.27   |        | 1.04   | 0.85   | -0.63   |        |
| Angola              | — | — | — | — | (445.73, | (532.53, | (0.54,  | <0.001 | (82.90,  | (77.33,  | (-0.79, | 0.315  | (0.74, | (0.68, | (-1.22, | 0.037  |
|                     |   |   |   |   | 459.05)  | 541.17)  | 0.69)   |        | 88.87)   | 80.73)   | 0.26)   |        | 1.44)  | 1.05)  | -0.04)  |        |
|                     |   |   |   |   | 561.06   | 576.12   | 0.09    |        | 131.28   | 101.02   | -0.87   |        | 1.72   | 1.19   | -1.17   |        |
| Antigua and Barbuda | — | — | — | — | (473.55, | (498.54, | (0.08,  | <0.001 | (90.44,  | (70.46,  | (-1.11, | <0.001 | (0.00, | (0.00, | (-1.51, | <0.001 |
|                     |   |   |   |   | 660.80)  | 662.66)  | 0.10)   |        | 184.96)  | 140.79)  | -0.63)  |        | 19.75) | 13.99) | -0.83)  |        |
|                     |   |   |   |   | 266.33   | 371.86   | 1.16    |        | 83.80    | 61.90    | -1.08   |        | 1.18   | 0.71   | -1.74   |        |
| Argentina           | — | — | — | — | (263.45, | (369.00, | (1.13,  | <0.001 | (82.18,  | (60.74,  | (-1.41, | <0.001 | (0.99, | (0.59, | (-2.19, | <0.001 |
|                     |   |   |   |   | 269.23)  | 374.74)  | 1.19)   |        | 85.45)   | 63.08)   | -0.75)  |        | 1.39)  | 0.84)  | -1.28)  |        |
|                     |   |   |   |   | 102.30   | 104.38   | 0.07    |        | 28.21    | 22.78    | -0.75   |        | 0.38   | 0.29   | -1.10   |        |
| Armenia             | — | — | — | — | (97.13,  | (98.22,  | (0.05,  | <0.001 | (25.52,  | (20.05,  | (-1.44, | 0.032  | (0.13, | (0.07, | (-1.90, | 0.008  |
|                     |   |   |   |   | 107.68)  | 110.87)  | 0.09)   |        | 31.11)   | 25.84)   | -0.06)  |        | 0.87)  | 0.91)  | -0.29)  |        |
|                     |   |   |   |   | 212.29   | 203.18   | -0.16   |        | 29.58    | 30.57    | 0.09    |        | 0.31   | 0.34   | 0.38    |        |
| Australia           | — | — | — | — | (208.86, | (200.18, | (-0.18, | <0.001 | (28.30,  | (29.42,  | (-0.23, | 0.580  | (0.19, | (0.23, | (-0.35, | 0.306  |

|            |   |   |   |   |          |          |         |        |          |          |         |        |        |        |         |        |
|------------|---|---|---|---|----------|----------|---------|--------|----------|----------|---------|--------|--------|--------|---------|--------|
|            |   |   |   |   | 215.76)  | 206.22)  | -0.14)  |        | 30.89)   | 31.76)   | 0.41)   |        | 0.47)  | 0.49)  | 1.12)   |        |
|            |   |   |   |   | 320.37   | 297.87   | -0.27   |        | 49.23    | 29.52    | -1.75   |        | 0.54   | 0.23   | -2.93   |        |
| Austria    | — | — | — | — | (313.99, | (291.42, | (-0.30, | <0.001 | (46.75,  | (27.54,  | (-2.21, | <0.001 | (0.31, | (0.09, | (-3.65, | <0.001 |
|            |   |   |   |   | 326.86)  | 304.44)  | -0.23)  |        | 51.82)   | 31.63)   | -1.29)  |        | 0.89)  | 0.51)  | -2.20)  |        |
|            |   |   |   |   | 104.46   | 107.80   | 0.11    |        | 50.87    | 45.96    | -0.42   |        | 0.75   | 0.66   | -0.56   |        |
| Azerbaijan | — | — | — | — | (100.96, | (104.58, | (0.09,  | <0.001 | (48.39,  | (43.93,  | (-1.11, | 0.226  | (0.48, | (0.44, | (-1.39, | 0.190  |
|            |   |   |   |   | 108.06)  | 111.10)  | 0.14)   |        | 53.45)   | 48.08)   | 0.26)   |        | 1.14)  | 0.97)  | 0.28)   |        |
|            |   |   |   |   | 276.95   | 286.75   | 0.12    |        | 142.77   | 147.72   | 0.09    |        | 2.19   | 2.28   | 0.06    |        |
| Bahamas    | — | — | — | — | (247.81, | (260.17, | (0.11,  | <0.001 | (121.52, | (129.01, | (-0.10, | 0.349  | (0.35, | (0.55, | (-0.16, | 0.611  |
|            |   |   |   |   | 308.82)  | 315.36)  | 0.13)   |        | 166.88)  | 168.46)  | 0.29)   |        | 7.52)  | 6.35)  | 0.28)   |        |
|            |   |   |   |   | 286.13   | 310.29   | 0.28    |        | 56.80    | 41.11    | -1.10   |        | 0.68   | 0.40   | -1.77   |        |
| Bahrain    | — | — | — | — | (265.63, | (295.69, | (0.23,  | <0.001 | (47.72,  | (35.88,  | (-1.46, | <0.001 | (0.06, | (0.06, | (-2.29, | <0.001 |
|            |   |   |   |   | 308.01)  | 325.51)  | 0.33)   |        | 67.33)   | 46.97)   | -0.74)  |        | 3.22)  | 1.58)  | -1.24)  |        |
|            |   |   |   |   | 207.32   | 227.04   | 0.31    |        | 73.42    | 52.46    | -1.11   |        | 1.04   | 0.67   | -1.45   |        |
| Bangladesh | — | — | — | — | (205.93, | (225.90, | (0.30,  | <0.001 | (72.58,  | (51.91,  | (-1.37, | <0.001 | (0.94, | (0.61, | (-1.76, | <0.001 |
|            |   |   |   |   | 208.71)  | 228.17)  | 0.32)   |        | 74.27)   | 53.01)   | -0.84)  |        | 1.15)  | 0.73)  | -1.13)  |        |
|            |   |   |   |   | 347.34   | 362.49   | 0.14    |        | 95.62    | 82.18    | -0.63   |        | 1.30   | 1.06   | -0.86   |        |
| Barbados   | — | — | — | — | (313.24, | (325.83, | (0.13,  | <0.001 | (78.16,  | (65.40,  | (-1.04, | 0.003  | (0.08, | (0.03, | (-1.43, | 0.003  |
|            |   |   |   |   | 384.20)  | 402.24)  | 0.16)   |        | 115.87)  | 102.07)  | -0.21)  |        | 5.90)  | 5.95)  | -0.29)  |        |
|            |   |   |   |   | 87.23    | 92.78    | 0.22    |        | 42.23    | 47.84    | 0.39    |        | 0.64   | 0.74   | 0.42    |        |
| Belarus    | — | — | — | — | (84.31,  | (89.19,  | (0.20,  | <0.001 | (40.25,  | (45.46,  | (-0.34, | 0.294  | (0.42, | (0.47, | (-0.43, | 0.335  |
|            |   |   |   |   | 90.24)   | 96.50)   | 0.24)   |        | 44.29)   | 50.33)   | 1.12)   |        | 0.95)  | 1.12)  | 1.26)   |        |
|            |   |   |   |   | 359.97   | 397.37   | 0.34    |        | 50.38    | 38.25    | -0.97   |        | 0.53   | 0.29   | -2.08   |        |
| Belgium    | — | — | — | — | (353.93, | (390.81, | (0.27,  | <0.001 | (48.15,  | (36.24,  | (-1.22, | <0.001 | (0.32, | (0.14, | (-2.59, | <0.001 |
|            |   |   |   |   | 366.10)  | 404.02)  | 0.41)   |        | 52.70)   | 40.34)   | -0.72)  |        | 0.82)  | 0.54)  | -1.56)  |        |
|            |   |   |   |   | 274.15   | 370.29   | 1.03    |        | 83.59    | 115.79   | 1.08    |        | 1.15   | 1.62   | 1.13    |        |
| Belize     | — | — | — | — | (239.30, | (342.86, | (0.99,  | <0.001 | (63.35,  | (100.31, | (0.63,  | <0.001 | (0.01, | (0.30, | (0.54,  | <0.001 |
|            |   |   |   |   | 313.54)  | 399.43)  | 1.07)   |        | 108.95)  | 133.06)  | 1.52)   |        | 9.29)  | 5.07)  | 1.73)   |        |
|            |   |   |   |   | 749.87   | 827.50   | 0.34    |        | 135.63   | 116.82   | -0.50   |        | 1.60   | 1.21   | -0.91   |        |
| Benin      | — | — | — | — | (736.98, | (819.47, | (0.33,  | <0.001 | (130.03, | (113.74, | (-0.59, | <0.001 | (1.04, | (0.90, | (-1.06, | <0.001 |
|            |   |   |   |   | 762.95)  | 835.60)  | 0.35)   |        | 141.42)  | 119.98)  | -0.41)  |        | 2.38)  | 1.58)  | -0.77)  |        |
|            |   |   |   |   | 493.10   | 511.92   | 0.13    |        | 98.40    | 71.18    | -1.21   |        | 1.20   | 0.73   | -1.87   |        |
| Bermuda    | — | — | — | — | (409.63, | (410.76, | (0.12,  | <0.001 | (63.88,  | (37.57,  | (-1.39, | <0.001 | (0.00, | (0.00, | (-2.16, | <0.001 |

|                   |   |   |   |   |          |          |         |        |          |          |         |        |        |        |         |        |
|-------------------|---|---|---|---|----------|----------|---------|--------|----------|----------|---------|--------|--------|--------|---------|--------|
|                   |   |   |   |   | 590.35)  | 632.07)  | 0.14)   |        | 147.30)  | 124.98)  | -1.03)  |        | 22.14) | 27.44) | -1.58)  |        |
|                   |   |   |   |   | 104.63   | 116.56   | 0.37    |        | 43.26    | 35.96    | -0.66   |        | 0.64   | 0.50   | -0.91   |        |
| Bhutan            | — | — | — | — | (92.23,  | (105.48, | (0.32,  | <0.001 | (35.10,  | (29.95,  | (-0.75, | <0.001 | (0.04, | (0.05, | (-1.04, | <0.001 |
|                   |   |   |   |   | 118.42)  | 128.52)  | 0.42)   |        | 52.90)   | 42.86)   | -0.57)  |        | 3.17)  | 2.02)  | -0.77)  |        |
| Bolivia           |   |   |   |   | 205.75   | 255.53   | 0.75    |        | 93.60    | 53.63    | -1.90   |        | 1.37   | 0.66   | -2.51   |        |
| (Plurinational    | — | — | — | — | (200.34, | (251.11, | (0.74,  | <0.001 | (89.76,  | (51.59,  | (-2.01, | <0.001 | (0.94, | (0.45, | (-2.64, | <0.001 |
| State of)         |   |   |   |   | 211.28)  | 260.01)  | 0.76)   |        | 97.56)   | 55.74)   | -1.78)  |        | 1.94)  | 0.94)  | -2.38)  |        |
|                   |   |   |   |   | 293.75   | 297.84   | 0.06    |        | 52.58    | 29.14    | -2.04   |        | 0.63   | 0.22   | -3.63   |        |
| Bosnia and        |   |   |   |   | (286.12, | (287.15, | (-0.00, | 0.057  | (49.40,  | (25.92,  | (-2.38, | <0.001 | (0.33, | (0.03, | (-4.06, | <0.001 |
| Herzegovina       | — | — | — | — | 301.55)  | 308.84)  | 0.11)   |        | 55.91)   | 32.68)   | -1.70)  |        | 1.10)  | 0.78)  | -3.21)  |        |
|                   |   |   |   |   | 271.25   | 285.83   | 0.18    |        | 62.85    | 56.30    | -0.38   |        | 0.82   | 0.69   | -0.60   |        |
| Botswana          | — | — | — | — | (257.24, | (275.62, | (0.16,  | <0.001 | (55.84,  | (51.87,  | (-0.54, | <0.001 | (0.20, | (0.29, | (-0.90, | <0.001 |
|                   |   |   |   |   | 285.92)  | 296.33)  | 0.19)   |        | 70.57)   | 61.02)   | -0.23)  |        | 2.31)  | 1.42)  | -0.30)  |        |
|                   |   |   |   |   | 244.94   | 275.54   | 0.41    |        | 62.91    | 59.11    | -0.22   |        | 0.85   | 0.75   | -0.38   |        |
| Brazil            | — | — | — | — | (243.73, | (274.42, | (0.38,  | <0.001 | (62.28,  | (58.60,  | (-0.46, | 0.078  | (0.77, | (0.70, | (-0.70, | 0.021  |
|                   |   |   |   |   | 246.16)  | 276.66)  | 0.44)   |        | 63.55)   | 59.63)   | 0.03)   |        | 0.92)  | 0.81)  | -0.06)  |        |
|                   |   |   |   |   | 88.99    | 88.97    | -0.01   |        | 36.65    | 24.47    | -1.38   |        | 0.54   | 0.34   | -1.58   |        |
| Brunei Darussalam | — | — | — | — | (73.20,  | (76.50,  | (-0.02, | 0.213  | (26.76,  | (18.22,  | (-1.53, | <0.001 | (0.00, | (0.00, | (-1.75, | <0.001 |
|                   |   |   |   |   | 107.29)  | 103.03)  | 0.00)   |        | 49.10)   | 32.35)   | -1.23)  |        | 4.29)  | 2.80)  | -1.40)  |        |
|                   |   |   |   |   | 788.75   | 804.00   | 0.07    |        | 191.43   | 145.26   | -0.92   |        | 2.55   | 1.75   | -1.28   |        |
| Bulgaria          | — | — | — | — | (778.55, | (790.57, | (0.06,  | <0.001 | (186.52, | (139.95, | (-1.51, | 0.002  | (2.01, | (1.23, | (-2.07, | 0.002  |
|                   |   |   |   |   | 799.06)  | 817.62)  | 0.08)   |        | 196.44)  | 150.75)  | -0.32)  |        | 3.18)  | 2.44)  | -0.48)  |        |
|                   |   |   |   |   | 573.22   | 606.31   | 0.19    |        | 117.63   | 106.71   | -0.31   |        | 1.47   | 1.24   | -0.57   |        |
| Burkina Faso      | — | — | — | — | (564.92, | (601.10, | (0.18,  | <0.001 | (113.73, | (104.47, | (-0.50, | 0.002  | (1.06, | (1.01, | (-0.79, | <0.001 |
|                   |   |   |   |   | 581.63)  | 611.56)  | 0.21)   |        | 121.65)  | 108.99)  | -0.12)  |        | 2.01)  | 1.52)  | -0.35)  |        |
|                   |   |   |   |   | 442.15   | 498.99   | 0.41    |        | 143.62   | 90.83    | -1.61   |        | 2.01   | 1.07   | -2.18   |        |
| Burundi           | — | — | — | — | (433.07, | (492.54, | (0.37,  | <0.001 | (138.37, | (88.05,  | (-1.73, | <0.001 | (1.43, | (0.78, | (-2.51, | <0.001 |
|                   |   |   |   |   | 451.38)  | 505.51)  | 0.44)   |        | 149.03)  | 93.68)   | -1.49)  |        | 2.77)  | 1.43)  | -1.85)  |        |
|                   |   |   |   |   | 1236.31  | 1331.46  | 0.27    |        | 185.41   | 133.77   | -1.15   |        | 2.01   | 1.02   | -2.34   |        |
| Cabo Verde        | — | — | — | — | (1176.15 | (1286.30 | (0.24,  | <0.001 | (161.52, | (119.78, | (-1.30, | <0.001 | (0.27, | (0.17, | (-2.66, | <0.001 |
|                   |   |   |   |   | ,        | ,        | 0.29)   |        | 212.41)  | 148.99)  | -0.99)  |        | 7.99)  | 3.32)  | -2.02)  |        |
|                   |   |   |   |   | 1299.34) | 1377.83) |         |        |          |          |         |        |        |        |         |        |
| Cambodia          | — | — | — | — | 86.21    | 96.28    | 0.38    | <0.001 | 40.86    | 27.86    | -1.28   | <0.001 | 0.62   | 0.38   | -1.63   | <0.001 |

|                          |   |   |   |   |          |          |         |        |          |          |         |        |        |        |         |        |
|--------------------------|---|---|---|---|----------|----------|---------|--------|----------|----------|---------|--------|--------|--------|---------|--------|
|                          |   |   |   |   | (83.28,  | (94.02,  | (0.37,  |        | (38.78,  | (26.64,  | (-1.32, |        | (0.38, | (0.25, | (-1.70, |        |
|                          |   |   |   |   | 89.23)   | 98.58)   | 0.40)   |        | 43.03)   | 29.11)   | -1.25)  |        | 0.95)  | 0.56)  | -1.55)  |        |
|                          |   |   |   |   | 624.17   | 746.80   | 0.63    |        | 134.99   | 124.53   | -0.27   |        | 1.72   | 1.42   | -0.66   |        |
| Cameroon                 | — | — | — | — | (616.27, | (741.96, | (0.57,  | <0.001 | (131.18, | (122.51, | (-0.39, | <0.001 | (1.30, | (1.20, | (-0.73, | <0.001 |
|                          |   |   |   |   | 632.16)  | 751.67)  | 0.69)   |        | 138.88)  | 126.58)  | -0.15)  |        | 2.23)  | 1.66)  | -0.59)  |        |
|                          |   |   |   |   | 542.02   | 527.56   | -0.09   |        | 51.82    | 49.14    | -0.21   |        | 0.38   | 0.35   | -0.38   |        |
| Canada                   | — | — | — | — | (537.77, | (523.44, | (-0.11, | <0.001 | (50.51,  | (47.89,  | (-0.39, | 0.024  | (0.28, | (0.26, | (-0.96, | 0.194  |
|                          |   |   |   |   | 546.29)  | 531.72)  | -0.08)  |        | 53.16)   | 50.42)   | -0.03)  |        | 0.52)  | 0.48)  | 0.20)   |        |
|                          |   |   |   |   | 398.92   | 406.21   | 0.07    |        | 86.68    | 81.20    | -0.26   |        | 1.11   | 1.01   | -0.33   |        |
| Central African Republic | — | — | — | — | (386.86, | (397.63, | (0.05,  | <0.001 | (80.92,  | (77.27,  | (-0.49, | 0.020  | (0.54, | (0.61, | (-0.40, | <0.001 |
|                          |   |   |   |   | 411.31)  | 414.95)  | 0.09)   |        | 92.78)   | 85.29)   | -0.04)  |        | 2.07)  | 1.59)  | -0.26)  |        |
|                          |   |   |   |   | 570.48   | 611.83   | 0.24    |        | 120.03   | 108.43   | -0.25   |        | 1.50   | 1.26   | -0.47   |        |
| Chad                     | — | — | — | — | (560.27, | (605.38, | (0.21,  | <0.001 | (115.23, | (105.64, | (-0.30, | <0.001 | (1.00, | (0.97, | (-0.53, | <0.001 |
|                          |   |   |   |   | 580.85)  | 618.34)  | 0.27)   |        | 125.00)  | 111.28)  | -0.21)  |        | 2.18)  | 1.62)  | -0.41)  |        |
|                          |   |   |   |   | 197.55   | 247.61   | 0.77    |        | 33.18    | 34.69    | 0.24    |        | 0.38   | 0.36   | -0.08   |        |
| Chile                    | — | — | — | — | (193.96, | (243.89, | (0.74,  | <0.001 | (31.70,  | (33.31,  | (0.09,  | 0.002  | (0.24, | (0.23, | (-0.39, | 0.619  |
|                          |   |   |   |   | 201.19)  | 251.37)  | 0.81)   |        | 34.72)   | 36.12)   | 0.39)   |        | 0.59)  | 0.54)  | 0.24)   |        |
|                          |   |   |   |   | 59.01    | 92.03    | 1.50    |        | 21.70    | 15.66    | -1.09   |        | 0.31   | 0.18   | -1.81   |        |
| China                    | — | — | — | — | (58.80,  | (91.76,  | (1.32,  | <0.001 | (21.58,  | (15.55,  | (-1.36, | <0.001 | (0.29, | (0.16, | (-2.65, | <0.001 |
|                          |   |   |   |   | 59.21)   | 92.31)   | 1.68)   |        | 21.82)   | 15.77)   | -0.81)  |        | 0.32)  | 0.19)  | -0.97)  |        |
|                          |   |   |   |   | 290.32   | 330.02   | 0.44    |        | 59.63    | 46.01    | -0.94   |        | 0.74   | 0.48   | -1.59   |        |
| Colombia                 | — | — | — | — | (287.50, | (327.45, | (0.43,  | <0.001 | (58.34,  | (45.06,  | (-1.41, | <0.001 | (0.60, | (0.38, | (-2.31, | <0.001 |
|                          |   |   |   |   | 293.15)  | 332.60)  | 0.45)   |        | 60.95)   | 46.99)   | -0.48)  |        | 0.91)  | 0.58)  | -0.87)  |        |
|                          |   |   |   |   | 493.70   | 546.89   | 0.35    |        | 103.38   | 87.33    | -0.57   |        | 1.29   | 0.96   | -0.98   |        |
| Comoros                  | — | — | — | — | (460.32, | (520.54, | (0.33,  | <0.001 | (88.01,  | (76.93,  | (-2.44, | 0.555  | (0.15, | (0.18, | (-3.64, | 0.479  |
|                          |   |   |   |   | 529.13)  | 574.29)  | 0.38)   |        | 120.91)  | 98.81)   | 1.34)   |        | 5.25)  | 3.03)  | 1.75)   |        |
|                          |   |   |   |   | 459.98   | 499.76   | 0.29    |        | 94.68    | 72.86    | -0.93   |        | 1.19   | 0.78   | -1.47   |        |
| Congo                    | — | — | — | — | (446.40, | (490.29, | (0.26,  | <0.001 | (88.28,  | (69.24,  | (-1.52, | 0.002  | (0.56, | (0.45, | (-2.24, | <0.001 |
|                          |   |   |   |   | 473.92)  | 509.36)  | 0.32)   |        | 101.45)  | 76.62)   | -0.34)  |        | 2.26)  | 1.27)  | -0.69)  |        |
|                          |   |   |   |   | 208.39   | 221.95   | 0.21    |        | 76.63    | 56.93    | -1.00   |        | 1.09   | 0.75   | -1.24   |        |
| Cook Islands             | — | — | — | — | (121.89, | (119.21, | (0.19,  | <0.001 | (27.43,  | (13.14,  | (-1.12, | <0.001 | (0.00, | (0.00, | (-1.42, | <0.001 |
|                          |   |   |   |   | 339.53)  | 379.38)  | 0.24)   |        | 175.41)  | 160.22)  | -0.88)  |        | 62.51) | 68.06) | -1.06)  |        |
| Costa Rica               | — | — | — | — | 346.06   | 392.51   | 0.44    | <0.001 | 54.23    | 63.67    | 0.67    | 0.002  | 0.60   | 0.72   | 0.80    | 0.011  |

|                   |   |   |   |   |          |          |         |        |          |          |         |        |        |        |         |        |
|-------------------|---|---|---|---|----------|----------|---------|--------|----------|----------|---------|--------|--------|--------|---------|--------|
|                   |   |   |   |   | (335.99, | (383.69, | (0.43,  |        | (50.23,  | (60.17,  | (0.26,  |        | (0.25, | (0.40, | (0.18,  |        |
|                   |   |   |   |   | 356.37)  | 401.49)  | 0.45)   |        | 58.49)   | 67.33)   | 1.09)   |        | 1.25)  | 1.22)  | 1.41)   |        |
|                   |   |   |   |   | 676.73   | 724.12   | 0.23    |        | 138.42   | 111.98   | -0.72   |        | 1.70   | 1.22   | -1.12   |        |
| Cote d'Ivoire     | — | — | — | — | (669.38, | (719.09, | (0.20,  | <0.001 | (135.01, | (109.98, | (-0.84, | <0.001 | (1.34, | (1.01, | (-1.30, | <0.001 |
|                   |   |   |   |   | 684.14)  | 729.19)  | 0.26)   |        | 141.90)  | 114.01)  | -0.59)  |        | 2.15)  | 1.45)  | -0.93)  |        |
|                   |   |   |   |   | 198.32   | 184.60   | -0.24   |        | 41.97    | 19.09    | -2.69   |        | 0.55   | 0.16   | -4.19   |        |
| Croatia           | — | — | — | — | (191.87, | (177.12, | (-0.27, | <0.001 | (39.11,  | (16.78,  | (-3.07, | <0.001 | (0.27, | (0.02, | (-4.81, | <0.001 |
|                   |   |   |   |   | 204.93)  | 192.34)  | -0.22)  |        | 45.01)   | 21.66)   | -2.30)  |        | 1.01)  | 0.62)  | -3.57)  |        |
|                   |   |   |   |   | 147.14   | 153.96   | 0.16    |        | 27.61    | 26.91    | -0.12   |        | 0.33   | 0.31   | -0.20   |        |
| Cuba              | — | — | — | — | (143.73, | (149.91, | (0.15,  | <0.001 | (26.12,  | (25.25,  | (-0.32, | 0.254  | (0.18, | (0.16, | (-0.49, | 0.186  |
|                   |   |   |   |   | 150.60)  | 158.09)  | 0.16)   |        | 29.17)   | 28.66)   | 0.08)   |        | 0.55)  | 0.56)  | 0.10)   |        |
|                   |   |   |   |   | 219.28   | 222.98   | 0.05    |        | 38.29    | 28.89    | -0.98   |        | 0.46   | 0.29   | -1.68   |        |
| Cyprus            | — | — | — | — | (203.16, | (210.09, | (0.02,  | 0.001  | (31.72,  | (24.44,  | (-1.34, | <0.001 | (0.03, | (0.02, | (-2.56, | <0.001 |
|                   |   |   |   |   | 236.38)  | 236.60)  | 0.09)   |        | 45.87)   | 34.10)   | -0.62)  |        | 2.12)  | 1.64)  | -0.81)  |        |
|                   |   |   |   |   | 676.34   | 655.47   | -0.10   |        | 98.27    | 62.67    | -1.58   |        | 1.08   | 0.48   | -2.76   |        |
| Czechia           | — | — | — | — | (667.90, | (646.14, | (-0.12, | <0.001 | (95.12,  | (59.89,  | (-1.75, | <0.001 | (0.78, | (0.27, | (-3.43, | <0.001 |
|                   |   |   |   |   | 684.87)  | 664.91)  | -0.08)  |        | 101.49)  | 65.55)   | -1.41)  |        | 1.47)  | 0.80)  | -2.08)  |        |
| Democratic        |   |   |   |   | 74.34    | 73.38    | -0.05   |        | 25.59    | 21.11    | -0.67   |        | 0.36   | 0.29   | -0.76   |        |
| People's Republic | — | — | — | — | (72.48,  | (71.71,  | (-0.06, | <0.001 | (24.50,  | (20.23,  | (-0.70, | <0.001 | (0.24, | (0.19, | (-0.88, | <0.001 |
| of Korea          |   |   |   |   | 76.24)   | 75.09)   | -0.04)  |        | 26.72)   | 22.03)   | -0.64)  |        | 0.52)  | 0.41)  | -0.63)  |        |
| Democratic        |   |   |   |   | 452.37   | 469.05   | 0.14    |        | 77.42    | 69.13    | -0.42   |        | 0.91   | 0.75   | -0.71   |        |
| Republic of the   | — | — | — | — | (448.88, | (466.77, | (0.11,  | <0.001 | (75.93,  | (68.23,  | (-0.66, | 0.001  | (0.75, | (0.65, | (-0.88, | <0.001 |
| Congo             |   |   |   |   | 455.89)  | 471.33)  | 0.17)   |        | 78.93)   | 70.04)   | -0.18)  |        | 1.09)  | 0.85)  | -0.54)  |        |
|                   |   |   |   |   | 365.79   | 341.38   | -0.24   |        | 48.85    | 32.99    | -1.31   |        | 0.50   | 0.25   | -2.31   |        |
| Denmark           | — | — | — | — | (357.27, | (332.92, | (-0.26, | <0.001 | (45.78,  | (30.40,  | (-1.60, | <0.001 | (0.24, | (0.08, | (-2.89, | <0.001 |
|                   |   |   |   |   | 374.48)  | 350.02)  | -0.22)  |        | 52.07)   | 35.75)   | -1.02)  |        | 0.94)  | 0.63)  | -1.73)  |        |
|                   |   |   |   |   | 444.58   | 527.03   | 0.59    |        | 92.63    | 79.59    | -0.48   |        | 1.15   | 0.85   | -0.90   |        |
| Djibouti          | — | — | — | — | (415.45, | (507.11, | (0.55,  | <0.001 | (79.23,  | (72.00,  | (-0.97, | 0.060  | (0.14, | (0.25, | (-1.71, | 0.031  |
|                   |   |   |   |   | 475.43)  | 547.54)  | 0.64)   |        | 107.85)  | 87.79)   | 0.02)   |        | 4.49)  | 2.14)  | -0.08)  |        |
|                   |   |   |   |   | 262.84   | 272.08   | 0.11    |        | 132.85   | 116.20   | -0.47   |        | 2.02   | 1.73   | -0.52   |        |
| Dominica          | — | — | — | — | (206.62, | (212.14, | (0.08,  | <0.001 | (92.77,  | (78.32,  | (-0.84, | 0.012  | (0.00, | (0.00, | (-0.92, | 0.011  |
|                   |   |   |   |   | 330.87)  | 343.81)  | 0.14)   |        | 185.39)  | 166.13)  | -0.11)  |        | 20.16) | 18.04) | -0.12)  |        |
| Dominican         | — | — | — | — | 290.05   | 324.60   | 0.39    | <0.001 | 84.98    | 86.48    | 0.10    | 0.358  | 1.16   | 1.16   | 0.06    | 0.743  |



|                   |   |   |   |   |          |          |         |        |          |          |         |        |        |        |         |        |
|-------------------|---|---|---|---|----------|----------|---------|--------|----------|----------|---------|--------|--------|--------|---------|--------|
| Republic          |   |   |   |   | (284.07, | (319.37, | (0.38,  |        | (81.66,  | (83.77,  | (-0.11, |        | (0.79, | (0.87, | (-0.30, |        |
|                   |   |   |   |   | 296.13)  | 329.90)  | 0.40)   |        | 88.40)   | 89.24)   | 0.31)   |        | 1.64)  | 1.53)  | 0.42)   |        |
|                   |   |   |   |   | 205.60   | 225.91   | 0.33    |        | 77.75    | 43.38    | -2.08   |        | 1.11   | 0.52   | -2.70   |        |
| Ecuador           | — | — | — | — | (201.30, | (222.47, | (0.29,  | <0.001 | (75.03,  | (41.87,  | (-2.53, | <0.001 | (0.80, | (0.36, | (-3.22, | <0.001 |
|                   |   |   |   |   | 209.98)  | 229.38)  | 0.36)   |        | 80.55)   | 44.93)   | -1.63)  |        | 1.50)  | 0.71)  | -2.17)  |        |
|                   |   |   |   |   | 810.80   | 942.45   | 0.51    |        | 154.26   | 145.09   | -0.19   |        | 1.81   | 1.55   | -0.52   |        |
| Egypt             | — | — | — | — | (807.05, | (939.48, | (0.46,  | <0.001 | (152.61, | (143.93, | (-0.43, | 0.125  | (1.64, | (1.43, | (-0.86, | 0.003  |
|                   |   |   |   |   | 814.55)  | 945.41)  | 0.56)   |        | 155.93)  | 146.26)  | 0.05)   |        | 2.01)  | 1.67)  | -0.18)  |        |
|                   |   |   |   |   | 267.59   | 341.21   | 0.84    |        | 77.51    | 46.14    | -1.70   |        | 1.05   | 0.47   | -2.63   |        |
| El Salvador       | — | — | — | — | (260.75, | (334.13, | (0.83,  | <0.001 | (73.65,  | (43.53,  | (-2.09, | <0.001 | (0.64, | (0.24, | (-3.19, | <0.001 |
|                   |   |   |   |   | 274.59)  | 348.41)  | 0.86)   |        | 81.53)   | 48.88)   | -1.31)  |        | 1.65)  | 0.83)  | -2.07)  |        |
|                   |   |   |   |   | 432.66   | 526.29   | 0.69    |        | 85.07    | 62.22    | -1.06   |        | 1.05   | 0.57   | -2.06   |        |
| Equatorial Guinea | — | — | — | — | (400.10, | (508.61, | (0.64,  | <0.001 | (70.57,  | (56.07,  | (-1.26, | <0.001 | (0.07, | (0.13, | (-2.37, | <0.001 |
|                   |   |   |   |   | 467.37)  | 544.49)  | 0.73)   |        | 101.85)  | 68.93)   | -0.87)  |        | 4.93)  | 1.74)  | -1.75)  |        |
|                   |   |   |   |   | 410.12   | 477.00   | 0.52    |        | 108.99   | 94.31    | -0.49   |        | 1.48   | 1.16   | -0.84   |        |
| Eritrea           | — | — | — | — | (398.39, | (468.99, | (0.50,  | <0.001 | (102.78, | (90.69,  | (-0.78, | 0.001  | (0.83, | (0.79, | (-1.04, | <0.001 |
|                   |   |   |   |   | 422.15)  | 485.11)  | 0.55)   |        | 115.50)  | 98.04)   | -0.20)  |        | 2.47)  | 1.66)  | -0.63)  |        |
|                   |   |   |   |   | 193.50   | 200.06   | 0.12    |        | 43.10    | 30.81    | -0.96   |        | 0.55   | 0.34   | -1.51   |        |
| Estonia           | — | — | — | — | (181.98, | (185.45, | (0.05,  | 0.001  | (37.88,  | (25.56,  | (-1.90, | 0.049  | (0.12, | (0.02, | (-2.07, | <0.001 |
|                   |   |   |   |   | 205.58)  | 215.59)  | 0.20)   |        | 48.87)   | 36.94)   | -0.01)  |        | 1.62)  | 1.83)  | -0.95)  |        |
|                   |   |   |   |   | 250.63   | 258.96   | 0.10    |        | 53.63    | 54.23    | 0.01    |        | 0.68   | 0.68   | -0.05   |        |
| Eswatini          | — | — | — | — | (233.05, | (245.19, | (0.03,  | 0.003  | (45.17,  | (47.89,  | (-0.27, | 0.950  | (0.06, | (0.15, | (-0.42, | 0.781  |
|                   |   |   |   |   | 269.36)  | 273.36)  | 0.16)   |        | 63.34)   | 61.21)   | 0.29)   |        | 2.95)  | 1.99)  | 0.32)   |        |
|                   |   |   |   |   | 396.25   | 473.51   | 0.62    |        | 112.75   | 70.73    | -1.58   |        | 1.54   | 0.75   | -2.44   |        |
| Ethiopia          | — | — | — | — | (393.37, | (471.46, | (0.60,  | <0.001 | (111.17, | (69.92,  | (-1.68, | <0.001 | (1.36, | (0.67, | (-2.61, | <0.001 |
|                   |   |   |   |   | 399.15)  | 475.58)  | 0.64)   |        | 114.35)  | 71.54)   | -1.48)  |        | 1.74)  | 0.84)  | -2.26)  |        |
|                   |   |   |   |   | 313.93   | 329.17   | 0.16    |        | 161.82   | 138.67   | -0.48   |        | 2.40   | 2.00   | -0.56   |        |
| Fiji              | — | — | — | — | (295.06, | (310.58, | (0.13,  | <0.001 | (148.12, | (126.75, | (-0.60, | <0.001 | (1.00, | (0.82, | (-0.71, | <0.001 |
|                   |   |   |   |   | 333.76)  | 348.60)  | 0.18)   |        | 176.51)  | 151.41)  | -0.35)  |        | 4.93)  | 4.10)  | -0.42)  |        |
|                   |   |   |   |   | 281.97   | 255.22   | -0.36   |        | 44.84    | 31.83    | -1.19   |        | 0.50   | 0.31   | -1.69   |        |
| Finland           | — | — | — | — | (274.22, | (247.56, | (-0.43, | <0.001 | (41.83,  | (29.20,  | (-1.48, | <0.001 | (0.24, | (0.11, | (-2.09, | <0.001 |
|                   |   |   |   |   | 289.91)  | 263.07)  | -0.29)  |        | 48.03)   | 34.65)   | -0.89)  |        | 0.97)  | 0.73)  | -1.29)  |        |
|                   |   |   |   |   | 393.72   | 381.73   | -0.11   | <0.001 | 58.30    | 40.48    | -1.30   | <0.001 | 0.64   | 0.34   | -2.18   | <0.001 |

|           |   |   |   |   |          |          |         |        |          |          |         |        |        |        |         |        |
|-----------|---|---|---|---|----------|----------|---------|--------|----------|----------|---------|--------|--------|--------|---------|--------|
|           |   |   |   |   | (391.11, | (379.01, | (-0.13, |        | (57.30,  | (39.60,  | (-1.43, |        | (0.54, | (0.27, | (-2.71, |        |
|           |   |   |   |   | 396.35)  | 384.47)  | -0.09)  |        | 59.31)   | 41.37)   | -1.17)  |        | 0.75)  | 0.43)  | -1.65)  |        |
|           |   |   |   |   | 447.23   | 483.52   | 0.28    |        | 81.99    | 65.55    | -0.83   |        | 0.99   | 0.67   | -1.42   |        |
| Gabon     | — | — | — | — | (426.40, | (467.91, | (0.23,  | <0.001 | (72.91,  | (59.81,  | (-1.10, | <0.001 | (0.23, | (0.21, | (-1.81, | <0.001 |
|           |   |   |   |   | 468.91)  | 499.54)  | 0.33)   |        | 91.95)   | 71.72)   | -0.56)  |        | 2.82)  | 1.63)  | -1.02)  |        |
|           |   |   |   |   | 718.05   | 781.87   | 0.30    |        | 115.41   | 112.27   | -0.06   |        | 1.28   | 1.17   | -0.27   |        |
| Gambia    | — | — | — | — | (691.33, | (764.16, | (0.28,  | <0.001 | (104.56, | (105.47, | (-0.82, | 0.879  | (0.38, | (0.56, | (-1.44, | 0.651  |
|           |   |   |   |   | 745.67)  | 799.93)  | 0.32)   |        | 127.20)  | 119.44)  | 0.70)   |        | 3.36)  | 2.19)  | 0.91)   |        |
|           |   |   |   |   | 252.60   | 266.16   | 0.18    |        | 66.31    | 78.62    | 0.57    |        | 0.88   | 1.09   | 0.71    |        |
| Georgia   | — | — | — | — | (245.81, | (256.45, | (0.16,  | <0.001 | (62.89,  | (73.64,  | (-0.68, | 0.375  | (0.53, | (0.59, | (-0.80, | 0.360  |
|           |   |   |   |   | 259.53)  | 276.16)  | 0.20)   |        | 69.88)   | 83.87)   | 1.83)   |        | 1.38)  | 1.90)  | 2.25)   |        |
|           |   |   |   |   | 455.24   | 396.05   | -0.48   |        | 68.47    | 46.87    | -1.37   |        | 0.76   | 0.44   | -1.97   |        |
| Germany   | — | — | — | — | (452.81, | (393.60, | (-0.51, | <0.001 | (67.53,  | (46.04,  | (-1.67, | <0.001 | (0.66, | (0.36, | (-2.63, | <0.001 |
|           |   |   |   |   | 457.68)  | 398.52)  | -0.45)  |        | 69.41)   | 47.71)   | -1.07)  |        | 0.86)  | 0.53)  | -1.31)  |        |
|           |   |   |   |   | 718.26   | 764.03   | 0.21    |        | 141.52   | 112.19   | -0.81   |        | 1.73   | 1.19   | -1.30   |        |
| Ghana     | — | — | — | — | (711.39, | (759.42, | (0.20,  | <0.001 | (138.38, | (110.41, | (-0.93, | <0.001 | (1.40, | (1.01, | (-1.48, | <0.001 |
|           |   |   |   |   | 725.18)  | 768.66)  | 0.22)   |        | 144.71)  | 114.00)  | -0.68)  |        | 2.13)  | 1.39)  | -1.12)  |        |
|           |   |   |   |   | 163.47   | 153.09   | -0.23   |        | 28.74    | 24.11    | -0.57   |        | 0.34   | 0.27   | -0.82   |        |
| Greece    | — | — | — | — | (159.41, | (148.53, | (-0.24, | <0.001 | (27.05,  | (22.37,  | (-0.86, | <0.001 | (0.18, | (0.12, | (-1.22, | <0.001 |
|           |   |   |   |   | 167.60)  | 157.75)  | -0.21)  |        | 30.50)   | 25.96)   | -0.28)  |        | 0.58)  | 0.55)  | -0.43)  |        |
|           |   |   |   |   | 238.79   | 246.08   | 0.10    |        | 47.57    | 37.48    | -0.81   |        | 0.61   | 0.42   | -1.29   |        |
| Greenland | — | — | — | — | (183.79, | (183.36, | (0.02,  | 0.012  | (25.11,  | (16.06,  | (-1.44, | 0.014  | (0.00, | (0.00, | (-2.15, | 0.004  |
|           |   |   |   |   | 308.07)  | 325.08)  | 0.18)   |        | 85.80)   | 76.71)   | -0.16)  |        | 22.99) | 23.27) | -0.42)  |        |
|           |   |   |   |   | 263.46   | 278.97   | 0.20    |        | 121.58   | 82.55    | -1.38   |        | 1.85   | 1.16   | -1.66   |        |
| Grenada   | — | — | — | — | (210.88, | (229.99, | (0.19,  | <0.001 | (85.77,  | (56.58,  | (-1.82, | <0.001 | (0.00, | (0.00, | (-2.07, | <0.001 |
|           |   |   |   |   | 326.12)  | 335.83)  | 0.20)   |        | 168.06)  | 116.86)  | -0.95)  |        | 17.40) | 12.91) | -1.25)  |        |
|           |   |   |   |   | 121.33   | 130.71   | 0.26    |        | 29.22    | 36.43    | 0.82    |        | 0.37   | 0.49   | 1.04    |        |
| Guam      | — | — | — | — | (95.48,  | (103.60, | (0.24,  | <0.001 | (17.42,  | (22.76,  | (0.46,  | <0.001 | (0.00, | (0.00, | (0.56,  | <0.001 |
|           |   |   |   |   | 152.20)  | 162.96)  | 0.27)   |        | 46.25)   | 55.48)   | 1.18)   |        | 7.21)  | 7.63)  | 1.51)   |        |
|           |   |   |   |   | 288.52   | 424.04   | 1.34    |        | 112.62   | 68.27    | -1.82   |        | 1.62   | 0.76   | -2.67   |        |
| Guatemala | — | — | — | — | (282.56, | (419.54, | (1.29,  | <0.001 | (108.70, | (66.44,  | (-2.79, | <0.001 | (1.17, | (0.58, | (-3.91, | <0.001 |
|           |   |   |   |   | 294.59)  | 428.59)  | 1.39)   |        | 116.66)  | 70.14)   | -0.84)  |        | 2.19)  | 0.99)  | -1.40)  |        |
|           |   |   |   |   | 688.12   | 793.58   | 0.49    | <0.001 | 142.96   | 130.68   | -0.30   | <0.001 | 1.78   | 1.47   | -0.66   | <0.001 |

|                               |   |   |   |   |          |          |         |        |          |          |         |        |        |        |         |        |
|-------------------------------|---|---|---|---|----------|----------|---------|--------|----------|----------|---------|--------|--------|--------|---------|--------|
|                               |   |   |   |   | (677.17, | (785.67, | (0.47,  |        | (137.86, | (127.40, | (-0.38, |        | (1.25, | (1.13, | (-0.76, |        |
|                               |   |   |   |   | 699.22)  | 801.55)  | 0.51)   |        | 148.21)  | 134.03)  | -0.22)  |        | 2.48)  | 1.88)  | -0.56)  |        |
|                               |   |   |   |   | 297.34   | 338.96   | 0.45    |        | 163.89   | 125.00   | -0.93   |        | 2.48   | 1.79   | -1.13   |        |
| Guinea-Bissau                 | — | — | — | — | (280.01, | (326.31, | (0.43,  | <0.001 | (150.66, | (117.21, | (-1.03, | <0.001 | (1.10, | (0.96, | (-1.22, | <0.001 |
|                               |   |   |   |   | 315.56)  | 352.02)  | 0.47)   |        | 178.04)  | 133.21)  | -0.84)  |        | 4.95)  | 3.09)  | -1.04)  |        |
|                               |   |   |   |   | 134.33   | 168.86   | 0.79    |        | 116.17   | 133.79   | 0.51    |        | 1.85   | 2.14   | 0.53    |        |
| Guyana                        | — | — | — | — | (122.80, | (155.20, | (0.77,  | <0.001 | (104.62, | (121.12, | (-0.26, | 0.196  | (0.66, | (0.82, | (-0.31, | 0.216  |
|                               |   |   |   |   | 146.78)  | 183.47)  | 0.81)   |        | 128.72)  | 147.46)  | 1.27)   |        | 4.21)  | 4.61)  | 1.38)   |        |
|                               |   |   |   |   | 160.64   | 177.90   | 0.34    |        | 164.46   | 132.01   | -0.72   |        | 2.65   | 2.09   | -0.78   |        |
| Haiti                         | — | — | — | — | (155.63, | (174.33, | (0.33,  | <0.001 | (159.26, | (128.92, | (-1.09, | <0.001 | (2.03, | (1.71, | (-1.17, | <0.001 |
|                               |   |   |   |   | 165.78)  | 181.52)  | 0.36)   |        | 169.80)  | 135.17)  | -0.35)  |        | 3.42)  | 2.52)  | -0.40)  |        |
|                               |   |   |   |   | 200.66   | 253.40   | 0.81    |        | 77.23    | 45.53    | -1.83   |        | 1.13   | 0.55   | -2.47   |        |
| Honduras                      | — | — | — | — | (194.15, | (248.66, | (0.79,  | <0.001 | (72.94,  | (43.46,  | (-2.09, | <0.001 | (0.66, | (0.34, | (-2.82, | <0.001 |
|                               |   |   |   |   | 207.34)  | 258.21)  | 0.83)   |        | 81.71)   | 47.68)   | -1.56)  |        | 1.83)  | 0.85)  | -2.12)  |        |
|                               |   |   |   |   | 254.46   | 255.15   | 0.01    |        | 87.21    | 32.77    | -3.32   |        | 1.28   | 0.32   | -4.68   |        |
| Hungary                       | — | — | — | — | (249.18, | (249.09, | (-0.00, | 0.086  | (84.27,  | (30.69,  | (-3.62, | <0.001 | (0.95, | (0.15, | (-5.19, | <0.001 |
|                               |   |   |   |   | 259.83)  | 261.33)  | 0.03)   |        | 90.24)   | 34.96)   | -3.03)  |        | 1.69)  | 0.62)  | -4.17)  |        |
|                               |   |   |   |   | 228.99   | 236.27   | 0.10    |        | 29.90    | 23.26    | -0.87   |        | 0.29   | 0.18   | -1.70   |        |
| Iceland                       | — | — | — | — | (200.92, | (209.60, | (0.08,  | <0.001 | (20.35,  | (15.47,  | (-0.95, | <0.001 | (0.00, | (0.00, | (-1.96, | <0.001 |
|                               |   |   |   |   | 259.98)  | 265.60)  | 0.13)   |        | 42.50)   | 33.86)   | -0.79)  |        | 4.40)  | 4.08)  | -1.43)  |        |
|                               |   |   |   |   | 147.01   | 136.14   | -0.28   |        | 56.78    | 48.26    | -0.57   |        | 0.83   | 0.70   | -0.60   |        |
| India                         | — | — | — | — | (146.60, | (135.84, | (-0.30, | <0.001 | (56.53,  | (48.09,  | (-0.92, | 0.001  | (0.80, | (0.67, | (-0.96, | 0.001  |
|                               |   |   |   |   | 147.41)  | 136.43)  | -0.25)  |        | 57.04)   | 48.44)   | -0.23)  |        | 0.86)  | 0.72)  | -0.23)  |        |
|                               |   |   |   |   | 163.35   | 176.85   | 0.27    |        | 54.82    | 40.75    | -1.00   |        | 0.77   | 0.52   | -1.34   |        |
| Indonesia                     | — | — | — | — | (162.47, | (176.05, | (0.26,  | <0.001 | (54.29,  | (40.37,  | (-1.07, | <0.001 | (0.71, | (0.48, | (-1.40, | <0.001 |
|                               |   |   |   |   | 164.25)  | 177.66)  | 0.29)   |        | 55.35)   | 41.14)   | -0.93)  |        | 0.84)  | 0.56)  | -1.28)  |        |
|                               |   |   |   |   | 465.05   | 495.19   | 0.22    |        | 68.94    | 75.40    | 0.27    |        | 0.73   | 0.81   | 0.33    |        |
| Iran (Islamic<br>Republic of) | — | — | — | — | (462.20, | (492.78, | (0.21,  | <0.001 | (67.83,  | (74.48,  | (0.03,  | 0.030  | (0.62, | (0.71, | (-0.03, | 0.074  |
|                               |   |   |   |   | 467.92)  | 497.62)  | 0.23)   |        | 70.07)   | 76.34)   | 0.52)   |        | 0.86)  | 0.91)  | 0.70)   |        |
|                               |   |   |   |   | 297.59   | 319.52   | 0.24    |        | 83.91    | 52.06    | -1.65   |        | 1.15   | 0.59   | -2.30   |        |
| Iraq                          | — | — | — | — | (293.32, | (316.92, | (0.22,  | <0.001 | (81.60,  | (51.00,  | (-1.89, | <0.001 | (0.89, | (0.48, | (-2.54, | <0.001 |
|                               |   |   |   |   | 301.91)  | 322.13)  | 0.26)   |        | 86.27)   | 53.13)   | -1.40)  |        | 1.46)  | 0.72)  | -2.07)  |        |
|                               |   |   |   |   | 309.37   | 303.64   | -0.07   | <0.001 | 49.95    | 32.84    | -1.45   | <0.001 | 0.57   | 0.28   | -2.42   | <0.001 |

|              |   |   |   |   |          |          |         |        |          |          |         |        |        |        |         |        |
|--------------|---|---|---|---|----------|----------|---------|--------|----------|----------|---------|--------|--------|--------|---------|--------|
|              |   |   |   |   | (300.00, | (295.07, | (-0.10, |        | (46.23,  | (30.10,  | (-2.02, |        | (0.24, | (0.09, | (-3.44, |        |
|              |   |   |   |   | 318.96)  | 312.41)  | -0.04)  |        | 53.89)   | 35.77)   | -0.87)  |        | 1.15)  | 0.70)  | -1.39)  |        |
|              |   |   |   |   | 213.99   | 214.78   | 0.01    |        | 30.62    | 24.17    | -0.80   |        | 0.32   | 0.21   | -1.44   |        |
| Israel       | — | — | — | — | (207.44, | (209.75, | (-0.00, | 0.111  | (28.18,  | (22.51,  | (-0.99, | <0.001 | (0.12, | (0.08, | (-1.72, | <0.001 |
|              |   |   |   |   | 220.70)  | 219.91)  | 0.03)   |        | 33.23)   | 25.93)   | -0.62)  |        | 0.70)  | 0.44)  | -1.15)  |        |
|              |   |   |   |   | 287.17   | 275.96   | -0.14   |        | 34.42    | 28.43    | -0.70   |        | 0.32   | 0.23   | -1.10   |        |
| Italy        | — | — | — | — | (284.90, | (273.35, | (-0.24, | 0.007  | (33.64,  | (27.61,  | (-0.88, | <0.001 | (0.25, | (0.16, | (-1.79, | 0.002  |
|              |   |   |   |   | 289.45)  | 278.60)  | -0.04)  |        | 35.22)   | 29.28)   | -0.53)  |        | 0.40)  | 0.31)  | -0.41)  |        |
|              |   |   |   |   | 243.60   | 275.29   | 0.43    |        | 48.64    | 66.18    | 1.22    |        | 0.60   | 0.88   | 1.54    |        |
| Jamaica      | — | — | — | — | (233.74, | (265.95, | (0.41,  | <0.001 | (44.19,  | (61.62,  | (0.40,  | 0.003  | (0.20, | (0.43, | (0.49,  | 0.004  |
|              |   |   |   |   | 253.80)  | 284.89)  | 0.46)   |        | 53.45)   | 71.00)   | 2.05)   |        | 1.43)  | 1.62)  | 2.60)   |        |
|              |   |   |   |   | 268.01   | 269.83   | 0.02    |        | 32.14    | 27.32    | -0.57   |        | 0.29   | 0.21   | -1.11   |        |
| Japan        | — | — | — | — | (266.49, | (268.04, | (0.01,  | 0.001  | (31.61,  | (26.76,  | (-0.76, | <0.001 | (0.25, | (0.17, | (-1.54, | <0.001 |
|              |   |   |   |   | 269.54)  | 271.63)  | 0.03)   |        | 32.67)   | 27.89)   | -0.38)  |        | 0.35)  | 0.27)  | -0.69)  |        |
|              |   |   |   |   | 410.50   | 428.04   | 0.14    |        | 63.35    | 43.61    | -1.28   |        | 0.70   | 0.35   | -2.37   |        |
| Jordan       | — | — | — | — | (399.76, | (422.30, | (0.13,  | <0.001 | (59.07,  | (41.78,  | (-1.60, | <0.001 | (0.31, | (0.20, | (-2.95, | <0.001 |
|              |   |   |   |   | 421.50)  | 433.84)  | 0.16)   |        | 67.88)   | 45.49)   | -0.96)  |        | 1.40)  | 0.56)  | -1.80)  |        |
|              |   |   |   |   | 154.01   | 166.58   | 0.28    |        | 101.44   | 56.69    | -1.94   |        | 1.57   | 0.82   | -2.18   |        |
| Kazakhstan   | — | — | — | — | (151.06, | (163.42, | (0.25,  | <0.001 | (99.06,  | (54.95,  | (-2.85, | <0.001 | (1.29, | (0.63, | (-3.17, | <0.001 |
|              |   |   |   |   | 157.00)  | 169.80)  | 0.31)   |        | 103.87)  | 58.47)   | -1.03)  |        | 1.90)  | 1.07)  | -1.18)  |        |
|              |   |   |   |   | 645.15   | 676.09   | 0.16    |        | 81.60    | 82.62    | 0.04    |        | 0.79   | 0.77   | -0.12   |        |
| Kenya        | — | — | — | — | (639.74, | (672.62, | (0.14,  | <0.001 | (79.63,  | (81.39,  | (-0.05, | 0.418  | (0.60, | (0.66, | (-0.26, | 0.094  |
|              |   |   |   |   | 650.60)  | 679.58)  | 0.18)   |        | 83.61)   | 83.86)   | 0.13)   |        | 1.02)  | 0.91)  | 0.02)   |        |
|              |   |   |   |   | 149.07   | 157.28   | 0.19    |        | 194.11   | 175.82   | -0.34   |        | 3.15   | 2.84   | -0.36   |        |
| Kiribati     | — | — | — | — | (109.11, | (124.24, | (0.18,  | <0.001 | (146.74, | (140.30, | (-0.43, | <0.001 | (0.06, | (0.16, | (-0.47, | <0.001 |
|              |   |   |   |   | 200.12)  | 196.72)  | 0.19)   |        | 252.84)  | 217.83)  | -0.25)  |        | 20.86) | 13.44) | -0.25)  |        |
|              |   |   |   |   | 330.69   | 374.09   | 0.43    |        | 44.79    | 39.20    | -0.46   |        | 0.43   | 0.31   | -1.19   |        |
| Kuwait       | — | — | — | — | (318.27, | (364.72, | (0.41,  | <0.001 | (40.35,  | (36.27,  | (-0.81, | 0.011  | (0.11, | (0.11, | (-1.80, | <0.001 |
|              |   |   |   |   | 343.51)  | 383.68)  | 0.45)   |        | 49.63)   | 42.34)   | -0.11)  |        | 1.26)  | 0.77)  | -0.58)  |        |
|              |   |   |   |   | 152.54   | 159.34   | 0.15    |        | 63.57    | 41.51    | -1.42   |        | 0.93   | 0.56   | -1.68   |        |
| Kyrgyzstan   | — | — | — | — | (146.97, | (154.57, | (0.14,  | <0.001 | (59.89,  | (39.08,  | (-1.99, | <0.001 | (0.53, | (0.31, | (-2.52, | <0.001 |
|              |   |   |   |   | 158.28)  | 164.23)  | 0.17)   |        | 67.43)   | 44.05)   | -0.85)  |        | 1.53)  | 0.94)  | -0.82)  |        |
| Lao People's | — | — | — | — | 84.71    | 98.79    | 0.53    | <0.001 | 40.01    | 40.23    | 0.05    | 0.605  | 0.60   | 0.58   | -0.08   | 0.524  |

|                     |   |   |   |   |                  |                  |                |        |                  |                  |                |        |              |              |                |        |
|---------------------|---|---|---|---|------------------|------------------|----------------|--------|------------------|------------------|----------------|--------|--------------|--------------|----------------|--------|
| Democratic Republic |   |   |   |   | (80.15, 89.48)   | (95.35, 102.32)  | (0.52, 0.54)   |        | (36.79, 43.44)   | (38.03, 42.53)   | (-0.14, 0.23)  |        | (0.26, 1.19) | (0.35, 0.93) | (-0.33, 0.17)  |        |
|                     |   |   |   |   | 36.97            | 38.19            | 0.11           |        | 26.62            | 18.50            | -1.17          |        | 0.42         | 0.29         | -1.19          |        |
| Latvia              | — | — | — | — | (33.17, 41.10)   | (32.95, 44.07)   | (0.10, 0.13)   | <0.001 | (23.47, 30.10)   | (15.21, 22.39)   | (-2.58, 0.27)  | 0.110  | (0.12, 1.10) | (0.03, 1.34) | (-2.89, 0.53)  | 0.174  |
|                     |   |   |   |   | 577.31           | 637.58           | 0.35           |        | 111.89           | 100.57           | -0.36          |        | 1.36         | 1.10         | -0.70          |        |
| Lebanon             | — | — | — | — | (563.67, 591.21) | (626.49, 648.83) | (0.34, 0.35)   | <0.001 | (105.84, 118.20) | (96.25, 105.06)  | (-0.38, -0.34) | <0.001 | (0.76, 2.26) | (0.70, 1.68) | (-0.78, -0.62) | <0.001 |
|                     |   |   |   |   | 231.38           | 240.79           | 0.13           |        | 44.59            | 55.60            | 0.76           |        | 0.55         | 0.73         | 0.99           |        |
| Lesotho             | — | — | — | — | (220.17, 243.07) | (231.06, 250.85) | (0.09, 0.17)   | <0.001 | (39.53, 50.16)   | (50.91, 60.61)   | (0.62, 0.90)   | <0.001 | (0.12, 1.61) | (0.28, 1.54) | (0.79, 1.19)   | <0.001 |
|                     |   |   |   |   | 553.42           | 642.83           | 0.52           |        | 126.69           | 102.12           | -0.80          |        | 1.63         | 1.13         | -1.32          |        |
| Liberia             | — | — | — | — | (535.62, 571.68) | (631.75, 654.07) | (0.50, 0.53)   | <0.001 | (118.11, 135.75) | (97.64, 106.75)  | (-0.99, -0.60) | <0.001 | (0.79, 3.00) | (0.70, 1.74) | (-1.60, -1.03) | <0.001 |
|                     |   |   |   |   | 409.13           | 480.41           | 0.56           |        | 84.79            | 87.41            | 0.10           |        | 1.03         | 1.02         | -0.06          |        |
| Libya               | — | — | — | — | (399.28, 419.18) | (472.55, 488.37) | (0.52, 0.59)   | <0.001 | (80.26, 89.54)   | (84.10, 90.81)   | (-0.25, 0.45)  | 0.574  | (0.58, 1.72) | (0.70, 1.45) | (-0.42, 0.30)  | 0.746  |
|                     |   |   |   |   | 191.84           | 197.34           | 0.11           |        | 48.13            | 40.85            | -0.59          |        | 0.64         | 0.53         | -0.67          |        |
| Lithuania           | — | — | — | — | (184.62, 199.28) | (187.75, 207.33) | (0.08, 0.13)   | <0.001 | (44.56, 51.92)   | (36.69, 45.39)   | (-1.77, 0.61)  | 0.332  | (0.29, 1.23) | (0.16, 1.36) | (-2.16, 0.83)  | 0.379  |
|                     |   |   |   |   | 536.80           | 532.10           | -0.03          |        | 75.40            | 48.70            | -1.52          |        | 0.80         | 0.34         | -2.90          |        |
| Luxembourg          | — | — | — | — | (499.75, 576.19) | (501.15, 564.64) | (-0.05, -0.01) | 0.001  | (62.08, 91.13)   | (39.76, 59.27)   | (-1.73, -1.31) | <0.001 | (0.04, 4.86) | (0.00, 2.95) | (-3.28, -2.52) | <0.001 |
|                     |   |   |   |   | 776.38           | 886.01           | 0.46           |        | 262.77           | 193.82           | -1.03          |        | 3.71         | 2.45         | -1.39          |        |
| Madagascar          | — | — | — | — | (768.22, 784.61) | (880.41, 891.64) | (0.43, 0.48)   | <0.001 | (257.89, 267.73) | (191.15, 196.53) | (-1.36, -0.70) | <0.001 | (3.14, 4.36) | (2.16, 2.78) | (-1.76, -1.01) | <0.001 |
|                     |   |   |   |   | 420.60           | 479.27           | 0.46           |        | 94.53            | 84.59            | -0.37          |        | 1.21         | 0.98         | -0.72          |        |
| Malawi              | — | — | — | — | (413.87, 427.43) | (474.30, 484.29) | (0.40, 0.52)   | <0.001 | (91.27, 97.89)   | (82.46, 86.76)   | (-0.57, -0.17) | <0.001 | (0.86, 1.66) | (0.76, 1.25) | (-1.06, -0.39) | <0.001 |
|                     |   |   |   |   | 400.04           | 431.29           | 0.26           |        | 78.05            | 68.70            | -0.41          |        | 0.95         | 0.77         | -0.67          |        |
| Malaysia            | — | — | — | — | (395.49, 404.64) | (427.83, 434.77) | (0.25, 0.28)   | <0.001 | (76.02, 80.11)   | (67.33, 70.09)   | (-0.88, 0.07)  | 0.095  | (0.74, 1.21) | (0.63, 0.93) | (-1.20, -0.14) | 0.013  |
|                     |   |   |   |   | 248.31           | 310.89           | 0.78           | <0.001 | 98.74            | 80.94            | -0.61          | 0.008  | 1.44         | 1.06         | -0.95          | <0.001 |

|                   |   |   |   |   |          |          |         |        |          |          |         |        |        |        |         |        |
|-------------------|---|---|---|---|----------|----------|---------|--------|----------|----------|---------|--------|--------|--------|---------|--------|
|                   |   |   |   |   | (214.54, | (288.07, | (0.75,  |        | (76.91,  | (69.79,  | (-1.06, |        | (0.03, | (0.19, | (-1.44, |        |
|                   |   |   |   |   | 286.79)  | 335.34)  | 0.81)   |        | 125.64)  | 93.73)   | -0.16)  |        | 9.84)  | 4.17)  | -0.46)  |        |
|                   |   |   |   |   | 704.46   | 773.85   | 0.32    |        | 177.05   | 129.14   | -1.08   |        | 2.35   | 1.46   | -1.61   |        |
| Mali              | — | — | — | — | (695.00, | (767.79, | (0.30,  | <0.001 | (172.15, | (126.57, | (-1.29, | <0.001 | (1.81, | (1.20, | (-1.92, | <0.001 |
|                   |   |   |   |   | 714.02)  | 779.94)  | 0.35)   |        | 182.05)  | 131.75)  | -0.86)  |        | 3.01)  | 1.78)  | -1.30)  |        |
|                   |   |   |   |   | 232.77   | 209.09   | -0.38   |        | 32.40    | 26.56    | -0.69   |        | 0.33   | 0.25   | -0.92   |        |
| Malta             | — | — | — | — | (207.81, | (185.26, | (-0.41, | <0.001 | (23.60,  | (18.60,  | (-1.02, | <0.001 | (0.00, | (0.00, | (-1.63, | 0.012  |
|                   |   |   |   |   | 260.03)  | 235.50)  | -0.34)  |        | 43.60)   | 37.25)   | -0.36)  |        | 3.76)  | 4.33)  | -0.21)  |        |
|                   |   |   |   |   | 116.64   | 123.11   | 0.19    |        | 89.76    | 96.67    | 0.25    |        | 1.39   | 1.52   | 0.30    |        |
| Marshall Islands  | — | — | — | — | (71.75,  | (82.70,  | (0.17,  | <0.001 | (49.66,  | (61.16,  | (0.16,  | <0.001 | (0.00, | (0.00, | (0.16,  | <0.001 |
|                   |   |   |   |   | 181.80)  | 176.63)  | 0.20)   |        | 151.25)  | 145.48)  | 0.34)   |        | 29.85) | 19.12) | 0.44)   |        |
|                   |   |   |   |   | 701.36   | 766.77   | 0.30    |        | 134.67   | 85.94    | -1.52   |        | 1.62   | 0.74   | -2.65   |        |
| Mauritania        | — | — | — | — | (682.78, | (753.25, | (0.28,  | <0.001 | (126.39, | (81.37,  | (-1.59, | <0.001 | (0.82, | (0.37, | (-2.82, | <0.001 |
|                   |   |   |   |   | 720.37)  | 780.48)  | 0.33)   |        | 143.39)  | 90.72)   | -1.45)  |        | 2.92)  | 1.36)  | -2.48)  |        |
|                   |   |   |   |   | 257.42   | 266.86   | 0.13    |        | 82.09    | 62.42    | -0.94   |        | 1.17   | 0.81   | -1.19   |        |
| Mauritius         | — | — | — | — | (243.56, | (252.20, | (0.11,  | <0.001 | (74.33,  | (55.49,  | (-1.53, | 0.002  | (0.42, | (0.21, | (-1.62, | <0.001 |
|                   |   |   |   |   | 271.88)  | 282.18)  | 0.14)   |        | 90.47)   | 70.01)   | -0.35)  |        | 2.61)  | 2.16)  | -0.76)  |        |
|                   |   |   |   |   | 268.09   | 307.27   | 0.47    |        | 49.57    | 44.26    | -0.34   |        | 0.59   | 0.47   | -0.64   |        |
| Mexico            | — | — | — | — | (266.39, | (305.74, | (0.46,  | <0.001 | (48.82,  | (43.68,  | (-0.65, | 0.035  | (0.51, | (0.41, | (-0.97, | <0.001 |
|                   |   |   |   |   | 269.79)  | 308.81)  | 0.49)   |        | 50.33)   | 44.85)   | -0.02)  |        | 0.68)  | 0.53)  | -0.32)  |        |
| Micronesia        |   |   |   |   | 118.48   | 127.63   | 0.26    |        | 97.07    | 95.79    | -0.04   |        | 1.54   | 1.49   | -0.13   |        |
| (Federated States | — | — | — | — | (87.67,  | (96.38,  | (0.24,  | <0.001 | (67.89,  | (68.02,  | (-0.12, | 0.268  | (0.00, | (0.00, | (-0.21, | 0.003  |
| of)               |   |   |   |   | 157.59)  | 166.56)  | 0.27)   |        | 135.13)  | 131.65)  | 0.03)   |        | 14.40) | 13.31) | -0.04)  |        |
|                   |   |   |   |   | 156.65   | 148.33   | -0.19   |        | 26.86    | 25.48    | -0.18   |        | 0.31   | 0.30   | -0.15   |        |
| Monaco            | — | — | — | — | (86.22,  | (80.40,  | (-0.22, | <0.001 | (4.48,   | (4.03,   | (-0.25, | <0.001 | (0.00, | (0.00, | (-0.33, | 0.113  |
|                   |   |   |   |   | 271.22)  | 252.28)  | -0.16)  |        | 100.96)  | 86.64)   | -0.12)  |        | 61.87) | 44.87) | 0.04)   |        |
|                   |   |   |   |   | 120.44   | 135.70   | 0.42    |        | 84.42    | 37.17    | -2.81   |        | 1.31   | 0.50   | -3.31   |        |
| Mongolia          | — | — | — | — | (113.49, | (129.25, | (0.37,  | <0.001 | (78.18,  | (33.98,  | (-3.28, | <0.001 | (0.63, | (0.20, | (-3.80, | <0.001 |
|                   |   |   |   |   | 127.77)  | 142.41)  | 0.47)   |        | 91.08)   | 40.61)   | -2.34)  |        | 2.48)  | 1.09)  | -2.83)  |        |
|                   |   |   |   |   | 191.03   | 186.03   | -0.09   |        | 40.41    | 28.89    | -1.34   |        | 0.51   | 0.32   | -1.88   |        |
| Montenegro        | — | — | — | — | (174.27, | (167.79, | (-0.10, | <0.001 | (32.94,  | (22.13,  | (-2.39, | 0.014  | (0.03, | (0.00, | (-3.11, | 0.003  |
|                   |   |   |   |   | 208.99)  | 205.78)  | -0.07)  |        | 49.08)   | 37.16)   | -0.27)  |        | 2.46)  | 2.55)  | -0.62)  |        |
| Morocco           | — | — | — | — | 376.09   | 411.08   | 0.31    | <0.001 | 78.74    | 72.59    | -0.25   | 0.056  | 0.98   | 0.85   | -0.45   | 0.012  |

|             |   |   |   |   |          |           |         |        |          |          |         |        |         |        |         |        |
|-------------|---|---|---|---|----------|-----------|---------|--------|----------|----------|---------|--------|---------|--------|---------|--------|
|             |   |   |   |   | (372.35, | (407.80,  | (0.28,  |        | (76.99,  | (71.22,  | (-0.50, |        | (0.80,  | (0.70, | (-0.81, |        |
|             |   |   |   |   | 379.87)  | 414.38)   | 0.34)   |        | 80.51)   | 73.98)   | 0.01)   |        | 1.21)   | 1.01)  | -0.10)  |        |
|             |   |   |   |   | 361.63   | 424.97    | 0.56    |        | 72.04    | 84.72    | 0.57    |        | 0.90    | 1.05   | 0.56    |        |
| Mozambique  | — | — | — | — | (356.06, | (421.06,  | (0.52,  | <0.001 | (69.51,  | (82.94,  | (0.50,  | <0.001 | (0.63,  | (0.86, | (0.41,  | <0.001 |
|             |   |   |   |   | 367.26)  | 428.90)   | 0.60)   |        | 74.63)   | 86.54)   | 0.65)   |        | 1.24)   | 1.28)  | 0.72)   |        |
|             |   |   |   |   | 131.57   | 151.45    | 0.49    |        | 71.55    | 46.47    | -1.47   |        | 1.08    | 0.63   | -1.82   |        |
| Myanmar     | — | — | — | — | (129.86, | (149.84,  | (0.48,  | <0.001 | (70.26,  | (45.58,  | (-1.59, | <0.001 | (0.92,  | (0.53, | (-1.98, | <0.001 |
|             |   |   |   |   | 133.30)  | 153.08)   | 0.50)   |        | 72.86)   | 47.38)   | -1.35)  |        | 1.25)   | 0.75)  | -1.66)  |        |
|             |   |   |   |   | 271.63   | 294.56    | 0.28    |        | 50.95    | 43.63    | -0.47   |        | 0.62    | 0.47   | -0.87   |        |
| Namibia     | — | — | — | — | (258.10, | (284.15,  | (0.23,  | <0.001 | (44.89,  | (39.62,  | (-0.74, | 0.001  | (0.12,  | (0.14, | (-1.28, | <0.001 |
|             |   |   |   |   | 285.76)  | 305.27)   | 0.32)   |        | 57.66)   | 47.96)   | -0.20)  |        | 1.95)   | 1.17)  | -0.45)  |        |
|             |   |   |   |   | 134.19   | 142.71    | 0.21    |        | 109.00   | 108.68   | -0.02   |        | 1.72    | 1.69   | -0.06   |        |
| Nauru       | — | — | — | — | (46.89,  | (56.03,   | (0.19,  | <0.001 | (31.45,  | (34.44,  | (-0.13, | 0.800  | (0.00,  | (0.00, | (-0.15, | 0.187  |
|             |   |   |   |   | 308.32)  | 305.90)   | 0.23)   |        | 276.50)  | 262.62)  | 0.10)   |        | 107.03) | 96.41) | 0.03)   |        |
|             |   |   |   |   | 97.06    | 101.40    | 0.15    |        | 41.57    | 32.99    | -0.77   |        | 0.62    | 0.47   | -0.96   |        |
| Nepal       | — | — | — | — | (94.79,  | (99.66,   | (0.12,  | <0.001 | (40.05,  | (31.99,  | (-0.98, | <0.001 | (0.45,  | (0.35, | (-1.10, | <0.001 |
|             |   |   |   |   | 99.37)   | 103.16)   | 0.18)   |        | 43.14)   | 34.02)   | -0.56)  |        | 0.85)   | 0.61)  | -0.81)  |        |
|             |   |   |   |   | 308.29   | 325.12    | 0.18    |        | 38.49    | 33.44    | -0.48   |        | 0.37    | 0.27   | -1.05   |        |
| Netherlands | — | — | — | — | (303.89, | (320.27,  | (0.16,  | <0.001 | (36.95,  | (31.90,  | (-0.77, | 0.001  | (0.23,  | (0.15, | (-1.30, | <0.001 |
|             |   |   |   |   | 312.75)  | 330.03)   | 0.20)   |        | 40.08)   | 35.04)   | -0.20)  |        | 0.56)   | 0.45)  | -0.80)  |        |
|             |   |   |   |   | 102.74   | 68.67     | -1.37   |        | 25.17    | 17.61    | -1.15   |        | 0.32    | 0.23   | -1.04   |        |
| New Zealand | — | — | — | — | (97.47,  | (64.42,   | (-1.49, | <0.001 | (22.60,  | (15.49,  | (-1.56, | <0.001 | (0.10,  | (0.05, | (-1.68, | 0.002  |
|             |   |   |   |   | 108.22)  | 73.13)    | -1.25)  |        | 27.96)   | 19.94)   | -0.73)  |        | 0.80)   | 0.66)  | -0.39)  |        |
|             |   |   |   |   | 201.91   | 242.86    | 0.64    |        | 34.78    | 34.69    | -0.23   |        | 0.40    | 0.36   | -0.79   |        |
| Nicaragua   | — | — | — | — | (194.64, | (237.14,  | (0.62,  | <0.001 | (31.70,  | (32.54,  | (-0.64, | 0.260  | (0.13,  | (0.17, | (-1.47, | 0.023  |
|             |   |   |   |   | 209.42)  | 248.70)   | 0.66)   |        | 38.10)   | 36.96)   | 0.17)   |        | 0.97)   | 0.67)  | -0.11)  |        |
|             |   |   |   |   | 738.03   | 847.27    | 0.48    |        | 137.69   | 116.35   | -0.59   |        | 1.64    | 1.19   | -1.13   |        |
| Niger       | — | — | — | — | (727.99, | (840.87,  | (0.47,  | <0.001 | (133.22, | (113.89, | (-0.80, | <0.001 | (1.18,  | (0.94, | (-1.52, | <0.001 |
|             |   |   |   |   | 748.20)  | 853.70)   | 0.49)   |        | 142.28)  | 118.86)  | -0.38)  |        | 2.25)   | 1.48)  | -0.74)  |        |
|             |   |   |   |   | 906.53   | 1063.26   | 0.55    |        | 142.68   | 110.29   | -0.88   |        | 1.58    | 0.89   | -1.96   |        |
| Nigeria     | — | — | — | — | (903.35, | (1061.05, | (0.52,  | <0.001 | (141.38, | (109.56, | (-0.97, | <0.001 | (1.45,  | (0.83, | (-2.11, | <0.001 |
|             |   |   |   |   | 909.71)  | 1065.47)  | 0.58)   |        | 143.99)  | 111.02)  | -0.79)  |        | 1.73)   | 0.96)  | -1.82)  |        |

|                          |   |   |   |   |          |          |        |        |         |         |         |        |         |         |         |        |
|--------------------------|---|---|---|---|----------|----------|--------|--------|---------|---------|---------|--------|---------|---------|---------|--------|
|                          |   |   |   |   | 175.23   | 188.86   | 0.26   |        | 74.32   | 59.42   | -0.79   |        | 1.09    | 0.81    | -1.05   |        |
| Niue                     | — | — | — | — | (11.76,  | (5.97,   | (0.24, | <0.001 | (0.18,  | (0.00,  | (-0.93, | <0.001 | (0.00,  | (0.00,  | (-1.31, | <0.001 |
|                          |   |   |   |   | 817.27)  | 1065.55) | 0.28)  |        | 655.99) | 844.01) | -0.64)  |        | 519.92) | 733.70) | -0.78)  |        |
|                          |   |   |   |   | 140.92   | 144.25   | 0.09   |        | 29.78   | 23.61   | -0.80   |        | 0.37    | 0.26    | -1.29   |        |
| North Macedonia          | — | — | — | — | (132.85, | (135.53, | (0.07, | <0.001 | (26.15, | (20.27, | (-1.16, | <0.001 | (0.08,  | (0.03,  | (-1.80, | <0.001 |
|                          |   |   |   |   | 149.35)  | 153.43)  | 0.11)  |        | 33.78)  | 27.40)  | -0.43)  |        | 1.09)   | 1.07)   | -0.77)  |        |
|                          |   |   |   |   | 202.87   | 221.20   | 0.28   |        | 57.74   | 51.70   | -0.33   |        | 0.80    | 0.67    | -0.59   |        |
| Northern Mariana Islands | — | — | — | — | (147.67, | (150.97, | (0.16, | <0.001 | (31.27, | (19.53, | (-0.76, | 0.149  | (0.00,  | (0.00,  | (-1.19, | 0.057  |
|                          |   |   |   |   | 273.06)  | 320.05)  | 0.40)  |        | 99.49)  | 117.81) | 0.12)   |        | 21.30)  | 44.64)  | 0.02)   |        |
|                          |   |   |   |   | 215.02   | 252.83   | 0.54   |        | 34.68   | 22.96   | -1.43   |        | 0.39    | 0.16    | -2.96   |        |
| Norway                   | — | — | — | — | (207.88, | (245.41, | (0.44, | <0.001 | (31.86, | (20.78, | (-1.61, | <0.001 | (0.15,  | (0.03,  | (-3.58, | <0.001 |
|                          |   |   |   |   | 222.35)  | 260.43)  | 0.64)  |        | 37.69)  | 25.32)  | -1.25)  |        | 0.84)   | 0.50)   | -2.34)  |        |
|                          |   |   |   |   | 445.53   | 519.93   | 0.54   |        | 90.85   | 67.71   | -0.91   |        | 1.11    | 0.64    | -1.79   |        |
| Oman                     | — | — | — | — | (430.90, | (509.72, | (0.51, | <0.001 | (84.34, | (64.14, | (-1.34, | <0.001 | (0.50,  | (0.35,  | (-2.27, | <0.001 |
|                          |   |   |   |   | 460.53)  | 530.33)  | 0.58)  |        | 97.74)  | 71.47)  | -0.49)  |        | 2.13)   | 1.15)   | -1.31)  |        |
|                          |   |   |   |   | 115.70   | 121.92   | 0.18   |        | 54.38   | 72.73   | 1.02    |        | 0.82    | 1.12    | 1.08    |        |
| Pakistan                 | — | — | — | — | (114.64, | (121.20, | (0.14, | <0.001 | (53.62, | (72.16, | (0.93,  | <0.001 | (0.73,  | (1.05,  | (0.96,  | <0.001 |
|                          |   |   |   |   | 116.76)  | 122.64)  | 0.22)  |        | 55.15)  | 73.31)  | 1.11)   |        | 0.93)   | 1.19)   | 1.19)   |        |
|                          |   |   |   |   | 382.71   | 409.63   | 0.24   |        | 116.88  | 111.18  | -0.19   |        | 1.62    | 1.50    | -0.31   |        |
| Palau                    | — | — | — | — | (252.64, | (260.97, | (0.22, | <0.001 | (50.69, | (43.85, | (-0.33, | 0.007  | (0.00,  | (0.00,  | (-0.52, | 0.003  |
|                          |   |   |   |   | 558.76)  | 613.99)  | 0.26)  |        | 232.29) | 235.96) | -0.05)  |        | 62.04)  | 71.61)  | -0.11)  |        |
|                          |   |   |   |   | 373.26   | 400.47   | 0.24   |        | 61.44   | 49.84   | -0.71   |        | 0.69    | 0.47    | -1.32   |        |
| Palestine                | — | — | — | — | (358.99, | (391.75, | (0.23, | <0.001 | (55.67, | (46.79, | (-1.04, | <0.001 | (0.21,  | (0.22,  | (-2.03, | <0.001 |
|                          |   |   |   |   | 388.03)  | 409.34)  | 0.26)  |        | 67.72)  | 53.06)  | -0.38)  |        | 1.81)   | 0.92)   | -0.61)  |        |
|                          |   |   |   |   | 214.73   | 246.27   | 0.47   |        | 45.82   | 44.48   | -0.02   |        | 0.57    | 0.53    | -0.20   |        |
| Panama                   | — | — | — | — | (205.80, | (238.64, | (0.43, | <0.001 | (41.67, | (41.26, | (-0.24, | 0.895  | (0.20,  | (0.23,  | (-0.54, | 0.265  |
|                          |   |   |   |   | 223.98)  | 254.08)  | 0.50)  |        | 50.30)  | 47.88)  | 0.21)   |        | 1.33)   | 1.02)   | 0.15)   |        |
|                          |   |   |   |   | 79.69    | 88.69    | 0.38   |        | 48.62   | 53.14   | 0.25    |        | 0.75    | 0.81    | 0.22    |        |
| Papua New Guinea         | — | — | — | — | (75.48,  | (85.84,  | (0.35, | <0.001 | (45.21, | (50.91, | (0.03,  | 0.023  | (0.38,  | (0.55,  | (-0.04, | 0.095  |
|                          |   |   |   |   | 84.10)   | 91.61)   | 0.40)  |        | 52.24)  | 55.45)  | 0.46)   |        | 1.35)   | 1.14)   | 0.47)   |        |
|                          |   |   |   |   | 218.93   | 260.03   | 0.60   |        | 42.28   | 37.87   | -0.28   |        | 0.51    | 0.40    | -0.70   |        |
| Paraguay                 | — | — | — | — | (211.84, | (254.29, | (0.58, | <0.001 | (39.10, | (35.69, | (-0.80, | 0.299  | (0.21,  | (0.20,  | (-1.46, | 0.071  |
|                          |   |   |   |   | 226.22)  | 265.86)  | 0.61)  |        | 45.67)  | 40.15)  | 0.25)   |        | 1.04)   | 0.70)   | 0.06)   |        |



|                     |   |   |   |   |          |          |         |        |          |         |         |        |        |        |         |        |
|---------------------|---|---|---|---|----------|----------|---------|--------|----------|---------|---------|--------|--------|--------|---------|--------|
|                     |   |   |   |   | 379.51   | 478.02   | 0.80    |        | 88.03    | 58.26   | -1.31   |        | 1.11   | 0.53   | -2.39   |        |
| Peru                | — | — | — | — | (375.52, | (474.35, | (0.77,  | <0.001 | (86.07,  | (56.98, | (-1.83, | <0.001 | (0.90, | (0.42, | (-3.16, | <0.001 |
|                     |   |   |   |   | 383.54)  | 481.71)  | 0.82)   |        | 90.04)   | 59.55)  | -0.79)  |        | 1.36)  | 0.67)  | -1.62)  |        |
|                     |   |   |   |   | 108.62   | 110.37   | 0.06    |        | 15.72    | 36.63   | 3.02    |        | 0.16   | 0.51   | 4.18    |        |
| Philippines         | — | — | — | — | (107.37, | (109.42, | (0.04,  | <0.001 | (15.23,  | (36.07, | (2.67,  | <0.001 | (0.12, | (0.45, | (3.78,  | <0.001 |
|                     |   |   |   |   | 109.88)  | 111.33)  | 0.07)   |        | 16.22)   | 37.19)  | 3.38)   |        | 0.23)  | 0.58)  | 4.59)   |        |
|                     |   |   |   |   | 458.46   | 462.20   | 0.04    |        | 91.11    | 45.51   | -2.43   |        | 1.16   | 0.35   | -4.12   |        |
| Poland              | — | — | — | — | (454.88, | (458.22, | (0.00,  | 0.048  | (89.58,  | (44.32, | (-2.65, | <0.001 | (0.99, | (0.26, | (-4.68, | <0.001 |
|                     |   |   |   |   | 462.06)  | 466.20)  | 0.07)   |        | 92.65)   | 46.73)  | -2.21)  |        | 1.34)  | 0.47)  | -3.55)  |        |
|                     |   |   |   |   | 301.17   | 291.97   | -0.16   |        | 53.85    | 32.96   | -1.71   |        | 0.64   | 0.30   | -2.61   |        |
| Portugal            | — | — | — | — | (295.65, | (285.86, | (-0.28, | 0.007  | (51.53,  | (30.97, | (-2.19, | <0.001 | (0.41, | (0.14, | (-3.66, | <0.001 |
|                     |   |   |   |   | 306.77)  | 298.18)  | -0.05)  |        | 56.25)   | 35.05)  | -1.24)  |        | 0.95)  | 0.57)  | -1.54)  |        |
|                     |   |   |   |   | 257.49   | 266.14   | 0.11    |        | 74.50    | 44.98   | -1.94   |        | 1.04   | 0.52   | -2.66   |        |
| Puerto Rico         | — | — | — | — | (249.21, | (256.65, | (0.09,  | <0.001 | (70.03,  | (41.16, | (-2.23, | <0.001 | (0.57, | (0.19, | (-3.05, | <0.001 |
|                     |   |   |   |   | 265.98)  | 275.90)  | 0.13)   |        | 79.17)   | 49.06)  | -1.66)  |        | 1.73)  | 1.15)  | -2.25)  |        |
|                     |   |   |   |   | 376.66   | 383.25   | 0.06    |        | 55.67    | 39.30   | -1.14   |        | 0.59   | 0.31   | -2.06   |        |
| Qatar               | — | — | — | — | (351.11, | (372.34, | (0.03,  | <0.001 | (46.23,  | (35.91, | (-1.58, | <0.001 | (0.03, | (0.09, | (-2.74, | <0.001 |
|                     |   |   |   |   | 403.92)  | 394.53)  | 0.09)   |        | 66.87)   | 43.08)  | -0.69)  |        | 3.69)  | 1.12)  | -1.38)  |        |
|                     |   |   |   |   | 193.34   | 185.15   | -0.17   |        | 43.61    | 17.65   | -3.07   |        | 0.56   | 0.13   | -4.87   |        |
| Republic of Korea   | — | — | — | — | (191.47, | (183.12, | (-0.21, | <0.001 | (42.72,  | (17.03, | (-3.27, | <0.001 | (0.46, | (0.08, | (-5.66, | <0.001 |
|                     |   |   |   |   | 195.23)  | 187.20)  | -0.13)  |        | 44.51)   | 18.29)  | -2.88)  |        | 0.67)  | 0.20)  | -4.06)  |        |
|                     |   |   |   |   | 92.61    | 104.43   | 0.42    |        | 34.91    | 20.76   | -1.84   |        | 0.50   | 0.26   | -2.37   |        |
| Republic of Moldova | — | — | — | — | (88.07,  | (98.60,  | (0.40,  | <0.001 | (32.20,  | (18.35, | (-2.61, | <0.001 | (0.23, | (0.06, | (-3.36, | <0.001 |
|                     |   |   |   |   | 97.33)   | 110.54)  | 0.44)   |        | 37.80)   | 23.43)  | -1.05)  |        | 0.98)  | 0.79)  | -1.37)  |        |
|                     |   |   |   |   | 131.44   | 135.97   | 0.12    |        | 46.21    | 26.28   | -1.85   |        | 0.68   | 0.33   | -2.39   |        |
| Romania             | — | — | — | — | (129.00, | (132.83, | (0.08,  | <0.001 | (44.79,  | (24.97, | (-2.30, | <0.001 | (0.52, | (0.20, | (-3.31, | <0.001 |
|                     |   |   |   |   | 133.91)  | 139.17)  | 0.16)   |        | 47.66)   | 27.65)  | -1.41)  |        | 0.88)  | 0.51)  | -1.45)  |        |
|                     |   |   |   |   | 104.85   | 109.13   | 0.15    |        | 41.15    | 59.22   | 1.43    |        | 0.60   | 0.93   | 1.63    |        |
| Russian Federation  | — | — | — | — | (103.98, | (108.10, | (0.11,  | <0.001 | (40.63,  | (58.55, | (-0.19, | 0.084  | (0.54, | (0.85, | (-0.55, | 0.143  |
|                     |   |   |   |   | 105.73)  | 110.17)  | 0.18)   |        | 41.67)   | 59.90)  | 3.08)   |        | 0.67)  | 1.01)  | 3.86)   |        |
|                     |   |   |   |   | 431.78   | 496.41   | 0.49    |        | 157.22   | 89.65   | -1.92   |        | 2.26   | 1.06   | -2.61   |        |
| Rwanda              | — | — | — | — | (423.94, | (490.45, | (0.43,  | <0.001 | (152.40, | (87.10, | (-2.20, | <0.001 | (1.71, | (0.79, | (-2.78, | <0.001 |
|                     |   |   |   |   | 439.73)  | 502.43)  | 0.55)   |        | 162.17)  | 92.25)  | -1.64)  |        | 2.95)  | 1.38)  | -2.45)  |        |

|                                  |   |   |   |   |          |          |         |        |          |          |         |        |        |        |         |        |
|----------------------------------|---|---|---|---|----------|----------|---------|--------|----------|----------|---------|--------|--------|--------|---------|--------|
| Saint Kitts and Nevis            | — | — | — | — | 227.22   | 241.64   | 0.21    |        | 119.96   | 48.64    | -3.08   |        | 1.88   | 0.60   | -3.62   |        |
|                                  |   |   |   |   | (161.81, | (181.54, | (0.20,  | <0.001 | (72.85,  | (24.33,  | (-3.88, | <0.001 | (0.00, | (0.00, | (-4.65, | <0.001 |
|                                  |   |   |   |   | 311.88)  | 315.86)  | 0.22)   |        | 187.38)  | 87.81)   | -2.27)  |        | 29.23) | 19.34) | -2.58)  |        |
| Saint Lucia                      | — | — | — | — | 362.91   | 376.10   | 0.12    |        | 131.44   | 98.37    | -1.05   |        | 1.94   | 1.34   | -1.33   |        |
|                                  |   |   |   |   | (314.12, | (331.13, | (0.11,  | <0.001 | (101.36, | (76.29,  | (-1.41, | <0.001 | (0.04, | (0.03, | (-1.79, | <0.001 |
|                                  |   |   |   |   | 417.95)  | 425.64)  | 0.14)   |        | 168.30)  | 125.05)  | -0.68)  |        | 12.72) | 8.40)  | -0.87)  |        |
| Saint Vincent and the Grenadines | — | — | — | — | 484.72   | 515.47   | 0.21    |        | 164.33   | 143.43   | -0.51   |        | 2.36   | 1.97   | -0.68   |        |
|                                  |   |   |   |   | (422.88, | (449.00, | (0.20,  | <0.001 | (127.49, | (109.51, | (-1.34, | 0.228  | (0.05, | (0.03, | (-1.68, | 0.190  |
|                                  |   |   |   |   | 554.24)  | 589.12)  | 0.22)   |        | 209.49)  | 184.68)  | 0.32)   |        | 15.78) | 12.87) | 0.34)   |        |
| Samoa                            | — | — | — | — | 150.25   | 159.34   | 0.20    |        | 60.75    | 65.85    | 0.28    |        | 0.88   | 0.96   | 0.32    |        |
|                                  |   |   |   |   | (122.66, | (133.78, | (0.19,  | <0.001 | (42.53,  | (49.08,  | (0.25,  | <0.001 | (0.00, | (0.01, | (0.27,  | <0.001 |
|                                  |   |   |   |   | 183.25)  | 188.80)  | 0.21)   |        | 84.99)   | 86.85)   | 0.31)   |        | 9.97)  | 7.38)  | 0.38)   |        |
| San Marino                       | — | — | — | — | 740.42   | 730.89   | -0.05   |        | 84.89    | 80.31    | -0.20   |        | 0.77   | 0.70   | -0.30   |        |
|                                  |   |   |   |   | (574.02, | (575.08, | (-0.08, | <0.001 | (35.74,  | (35.43,  | (-0.25, | <0.001 | (0.00, | (0.00, | (-0.49, | 0.001  |
|                                  |   |   |   |   | 941.09)  | 917.07)  | -0.02)  |        | 171.27)  | 157.92)  | -0.14)  |        | 45.34) | 40.66) | -0.12)  |        |
| Sao Tome and Principe            | — | — | — | — | 1277.93  | 1475.22  | 0.50    |        | 190.64   | 216.20   | 0.42    |        | 2.09   | 2.28   | 0.29    |        |
|                                  |   |   |   |   | (1172.53 | (1396.04 | (0.48,  | <0.001 | (148.90, | (186.08, | (-0.08, | 0.099  | (0.01, | (0.25, | (-0.46, | 0.446  |
|                                  |   |   |   |   | 1391.76) | 1557.94) | 0.53)   |        | 241.77)  | 249.99)  | 0.92)   |        | 17.26) | 8.84)  | 1.04)   |        |
| Saudi Arabia                     | — | — | — | — | 266.20   | 289.71   | 0.29    |        | 59.81    | 58.31    | -0.08   |        | 0.77   | 0.73   | -0.19   |        |
|                                  |   |   |   |   | (262.26, | (287.21, | (0.26,  | <0.001 | (57.92,  | (57.22,  | (-0.24, | 0.341  | (0.57, | (0.61, | (-0.58, | 0.323  |
|                                  |   |   |   |   | 270.18)  | 292.24)  | 0.33)   |        | 61.74)   | 59.41)   | 0.08)   |        | 1.03)  | 0.86)  | 0.19)   |        |
| Senegal                          | — | — | — | — | 633.36   | 675.05   | 0.22    |        | 112.83   | 97.84    | -0.50   |        | 1.32   | 1.02   | -0.88   |        |
|                                  |   |   |   |   | (623.96, | (668.56, | (0.21,  | <0.001 | (108.76, | (95.32,  | (-0.83, | 0.003  | (0.90, | (0.78, | (-1.39, | 0.001  |
|                                  |   |   |   |   | 642.88)  | 681.60)  | 0.24)   |        | 117.02)  | 100.40)  | -0.16)  |        | 1.87)  | 1.33)  | -0.38)  |        |
| Serbia                           | — | — | — | — | 256.54   | 252.05   | -0.05   |        | 48.40    | 35.13    | -1.14   |        | 0.59   | 0.37   | -1.68   |        |
|                                  |   |   |   |   | (251.15, | (246.09, | (-0.10, | 0.097  | (46.12,  | (32.99,  | (-1.26, | <0.001 | (0.37, | (0.19, | (-1.87, | <0.001 |
|                                  |   |   |   |   | 262.02)  | 258.12)  | 0.01)   |        | 50.77)   | 37.38)   | -1.02)  |        | 0.91)  | 0.68)  | -1.49)  |        |
| Seychelles                       | — | — | — | — | 260.92   | 251.15   | -0.13   |        | 122.34   | 76.79    | -1.50   |        | 1.85   | 1.07   | -1.83   |        |
|                                  |   |   |   |   | (207.49, | (202.95, | (-0.15, | <0.001 | (85.49,  | (51.86,  | (-1.73, | <0.001 | (0.00, | (0.00, | (-2.37, | <0.001 |
|                                  |   |   |   |   | 325.44)  | 307.94)  | -0.11)  |        | 171.02)  | 110.40)  | -1.26)  |        | 19.39) | 13.47) | -1.29)  |        |
| Sierra Leone                     | — | — | — | — | 799.89   | 890.97   | 0.37    |        | 126.87   | 126.93   | 0.00    |        | 1.41   | 1.32   | -0.25   |        |
|                                  |   |   |   |   | (785.04, | (881.13, | (0.35,  | <0.001 | (120.89, | (123.15, | (-0.18, | 0.988  | (0.83, | (0.95, | (-0.53, | 0.084  |

|                 |   |   |   |   |          |          |         |        |          |         |         |        |        |        |         |        |
|-----------------|---|---|---|---|----------|----------|---------|--------|----------|---------|---------|--------|--------|--------|---------|--------|
|                 |   |   |   |   | 814.98)  | 900.91)  | 0.39)   |        | 133.10)  | 130.81) | 0.18)   | 2.24)  | 1.79)  | 0.03)  |         |        |
|                 |   |   |   |   | 139.99   | 132.65   | -0.20   |        | 29.95    | 16.67   | -2.05   | 0.39   | 0.16   | -3.10  |         |        |
| Singapore       | — | — | — | — | (134.15, | (127.71, | (-0.29, | <0.001 | (27.27,  | (14.94, | (-2.79, | <0.001 | (0.14, | (0.04, | (-4.14, | <0.001 |
|                 |   |   |   |   | 146.04)  | 137.77)  | -0.10)  |        | 32.83)   | 18.59)  | -1.30)  |        | 0.87)  | 0.54)  | -2.05)  |        |
|                 |   |   |   |   | 536.23   | 533.15   | -0.02   |        | 98.30    | 56.75   | -1.88   |        | 1.20   | 0.48   | -3.11   |        |
| Slovakia        | — | — | — | — | (526.12, | (521.97, | (-0.04, | 0.169  | (94.08,  | (53.27, | (-2.13, | <0.001 | (0.78, | (0.22, | (-3.49, | <0.001 |
|                 |   |   |   |   | 546.50)  | 544.54)  | 0.01)   |        | 102.66)  | 60.43)  | -1.64)  |        | 1.77)  | 0.96)  | -2.73)  |        |
|                 |   |   |   |   | 337.18   | 312.78   | -0.26   |        | 44.42    | 27.68   | -1.60   |        | 0.46   | 0.18   | -3.09   |        |
| Slovenia        | — | — | — | — | (324.12, | (297.89, | (-0.28, | <0.001 | (39.87,  | (23.49, | (-1.80, | <0.001 | (0.12, | (0.01, | (-3.64, | <0.001 |
|                 |   |   |   |   | 350.66)  | 328.27)  | -0.23)  |        | 49.37)   | 32.47)  | -1.41)  |        | 1.28)  | 1.16)  | -2.54)  |        |
|                 |   |   |   |   | 73.69    | 79.09    | 0.24    |        | 87.32    | 90.04   | 0.09    |        | 1.42   | 1.46   | 0.09    |        |
| Solomon Islands | — | — | — | — | (59.80,  | (68.85,  | (0.22,  | <0.001 | (70.69,  | (78.63, | (-0.03, | 0.126  | (0.10, | (0.36, | (-0.04, | 0.195  |
|                 |   |   |   |   | 90.35)   | 90.51)   | 0.25)   |        | 106.99)  | 102.69) | 0.21)   |        | 6.64)  | 4.00)  | 0.22)   |        |
|                 |   |   |   |   | 392.90   | 430.84   | 0.33    |        | 113.40   | 89.44   | -0.81   |        | 1.57   | 1.11   | -1.16   |        |
| Somalia         | — | — | — | — | (385.12, | (426.18, | (0.28,  | <0.001 | (109.15, | (87.27, | (-0.93, | <0.001 | (1.10, | (0.88, | (-1.45, | <0.001 |
|                 |   |   |   |   | 400.80)  | 435.54)  | 0.38)   |        | 117.78)  | 91.65)  | -0.68)  |        | 2.17)  | 1.40)  | -0.88)  |        |
|                 |   |   |   |   | 256.87   | 269.15   | 0.16    |        | 63.76    | 42.92   | -1.27   |        | 0.87   | 0.49   | -1.86   |        |
| South Africa    | — | — | — | — | (254.40, | (267.04, | (0.15,  | <0.001 | (62.48,  | (42.10, | (-2.30, | 0.017  | (0.72, | (0.41, | (-3.27, | 0.011  |
|                 |   |   |   |   | 259.36)  | 271.27)  | 0.17)   |        | 65.06)   | 43.75)  | -0.23)  |        | 1.03)  | 0.59)  | -0.44)  |        |
|                 |   |   |   |   | 484.17   | 547.55   | 0.43    |        | 88.88    | 71.44   | -0.71   |        | 1.07   | 0.71   | -1.36   |        |
| South Sudan     | — | — | — | — | (475.04, | (539.45, | (0.39,  | <0.001 | (84.87,  | (68.49, | (-1.02, | <0.001 | (0.66, | (0.44, | (-1.83, | <0.001 |
|                 |   |   |   |   | 493.45)  | 555.75)  | 0.47)   |        | 93.06)   | 74.51)  | -0.40)  |        | 1.66)  | 1.10)  | -0.88)  |        |
|                 |   |   |   |   | 248.84   | 250.34   | 0.01    |        | 49.72    | 31.02   | -1.71   |        | 0.61   | 0.30   | -2.54   |        |
| Spain           | — | — | — | — | (246.31, | (247.55, | (-0.04, | 0.703  | (48.58,  | (30.06, | (-1.92, | <0.001 | (0.49, | (0.21, | (-2.92, | <0.001 |
|                 |   |   |   |   | 251.39)  | 253.17)  | 0.06)   |        | 50.87)   | 32.01)  | -1.51)  |        | 0.75)  | 0.41)  | -2.16)  |        |
|                 |   |   |   |   | 152.61   | 161.86   | 0.20    |        | 104.85   | 47.90   | -2.58   |        | 1.63   | 0.66   | -2.99   |        |
| Sri Lanka       | — | — | — | — | (149.80, | (159.08, | (0.18,  | <0.001 | (102.51, | (46.40, | (-3.43, | <0.001 | (1.35, | (0.49, | (-4.04, | <0.001 |
|                 |   |   |   |   | 155.46)  | 164.67)  | 0.23)   |        | 107.24)  | 49.43)  | -1.73)  |        | 1.96)  | 0.86)  | -1.94)  |        |
|                 |   |   |   |   | 315.14   | 349.82   | 0.36    |        | 98.31    | 88.90   | -0.34   |        | 1.37   | 1.17   | -0.54   |        |
| Sudan           | — | — | — | — | (311.13, | (347.03, | (0.35,  | <0.001 | (96.01,  | (87.47, | (-0.43, | <0.001 | (1.11, | (1.01, | (-0.63, | <0.001 |
|                 |   |   |   |   | 319.18)  | 352.63)  | 0.37)   |        | 100.66)  | 90.35)  | -0.25)  |        | 1.68)  | 1.36)  | -0.44)  |        |
|                 |   |   |   |   | 170.15   | 187.42   | 0.34    |        | 67.35    | 69.11   | 0.21    |        | 0.99   | 1.00   | 0.17    |        |
| Suriname        | — | — | — | — | (150.65, | (169.52, | (0.32,  | <0.001 | (54.77,  | (58.44, | (-1.01, | 0.738  | (0.06, | (0.14, | (-1.41, | 0.833  |

|                            |   |   |   |   |          |          |         |        |          |          |         |        |         |         |         |        |
|----------------------------|---|---|---|---|----------|----------|---------|--------|----------|----------|---------|--------|---------|---------|---------|--------|
|                            |   |   |   |   | 191.77)  | 206.71)  | 0.35)   |        | 82.22)   | 81.19)   | 1.44)   |        | 4.88)   | 3.52)   | 1.78)   |        |
|                            |   |   |   |   | 394.89   | 194.52   | -2.21   |        | 47.55    | 22.74    | -2.42   |        | 0.44    | 0.20    | -2.49   |        |
| Sweden                     | — | — | — | — | (387.71, | (189.70, | (-2.50, | <0.001 | (45.09,  | (21.12,  | (-2.84, | <0.001 | (0.24,  | (0.08,  | (-3.03, | <0.001 |
|                            |   |   |   |   | 402.18)  | 199.43)  | -1.91)  |        | 50.11)   | 24.45)   | -2.00)  |        | 0.76)   | 0.44)   | -1.95)  |        |
|                            |   |   |   |   | 257.93   | 232.09   | -0.38   |        | 37.80    | 24.05    | -1.57   |        | 0.41    | 0.20    | -2.49   |        |
| Switzerland                | — | — | — | — | (251.92, | (226.48, | (-0.51, | <0.001 | (35.52,  | (22.28,  | (-1.78, | <0.001 | (0.20,  | (0.07,  | (-3.06, | <0.001 |
|                            |   |   |   |   | 264.06)  | 237.82)  | -0.25)  |        | 40.20)   | 25.93)   | -1.36)  |        | 0.75)   | 0.47)   | -1.91)  |        |
|                            |   |   |   |   | 418.19   | 482.58   | 0.50    |        | 157.70   | 84.85    | -2.06   |        | 2.28    | 0.99    | -2.78   |        |
| Syrian Arab Republic       | — | — | — | — | (412.18, | (476.32, | (0.48,  | <0.001 | (153.92, | (82.20,  | (-2.46, | <0.001 | (1.84,  | (0.72,  | (-3.31, | <0.001 |
|                            |   |   |   |   | 424.28)  | 488.90)  | 0.51)   |        | 161.55)  | 87.57)   | -1.65)  |        | 2.80)   | 1.34)   | -2.25)  |        |
|                            |   |   |   |   | 211.78   | 202.44   | -0.16   |        | 32.93    | 25.53    | -0.91   |        | 0.36    | 0.25    | -1.30   |        |
| Taiwan (Province of China) | — | — | — | — | (208.82, | (199.32, | (-0.17, | <0.001 | (31.77,  | (24.44,  | (-1.06, | <0.001 | (0.25,  | (0.15,  | (-1.59, | <0.001 |
|                            |   |   |   |   | 214.77)  | 205.60)  | -0.14)  |        | 34.12)   | 26.66)   | -0.75)  |        | 0.51)   | 0.39)   | -1.01)  |        |
|                            |   |   |   |   | 55.56    | 59.08    | 0.21    |        | 32.59    | 31.77    | -0.05   |        | 0.50    | 0.48    | -0.12   |        |
| Tajikistan                 | — | — | — | — | (52.40,  | (56.76,  | (0.20,  | <0.001 | (30.09,  | (30.05,  | (-0.62, | 0.859  | (0.23,  | (0.29,  | (-0.80, | 0.742  |
|                            |   |   |   |   | 58.88)   | 61.48)   | 0.22)   |        | 35.25)   | 33.57)   | 0.52)   |        | 0.96)   | 0.76)   | 0.58)   |        |
|                            |   |   |   |   | 244.45   | 257.75   | 0.18    |        | 42.55    | 40.67    | -0.08   |        | 0.50    | 0.45    | -0.29   |        |
| Thailand                   | — | — | — | — | (242.55, | (255.71, | (0.16,  | <0.001 | (41.75,  | (39.87,  | (-0.59, | 0.755  | (0.42,  | (0.37,  | (-1.03, | 0.445  |
|                            |   |   |   |   | 246.37)  | 259.80)  | 0.21)   |        | 43.37)   | 41.48)   | 0.43)   |        | 0.60)   | 0.54)   | 0.46)   |        |
|                            |   |   |   |   | 103.32   | 123.02   | 0.60    |        | 27.29    | 33.96    | 0.79    |        | 0.37    | 0.45    | 0.73    |        |
| Timor-Leste                | — | — | — | — | (92.45,  | (113.60, | (0.59,  | <0.001 | (21.73,  | (28.96,  | (-0.24, | 0.133  | (0.01,  | (0.06,  | (-0.05, | 0.067  |
|                            |   |   |   |   | 115.21)  | 133.11)  | 0.62)   |        | 33.93)   | 39.67)   | 1.82)   |        | 2.11)   | 1.78)   | 1.51)   |        |
|                            |   |   |   |   | 779.58   | 844.09   | 0.28    |        | 142.77   | 122.80   | -0.51   |        | 1.69    | 1.29    | -0.94   |        |
| Togo                       | — | — | — | — | (764.92, | (834.10, | (0.27,  | <0.001 | (136.30, | (118.95, | (-0.68, | <0.001 | (1.04,  | (0.92,  | (-1.18, | <0.001 |
|                            |   |   |   |   | 794.48)  | 854.17)  | 0.30)   |        | 149.49)  | 126.75)  | -0.35)  |        | 2.63)   | 1.77)   | -0.71)  |        |
|                            |   |   |   |   | 151.65   | 164.04   | 0.27    |        | 68.64    | 64.08    | -0.25   |        | 1.02    | 0.93    | -0.34   |        |
| Tokelau                    | — | — | — | — | (2.82,   | (1.87,   | (0.19,  | <0.001 | (0.01,   | (0.00,   | (-0.34, | <0.001 | (0.00,  | (0.00,  | (-0.51, | <0.001 |
|                            |   |   |   |   | 1068.78) | 1176.21) | 0.35)   |        | 941.44)  | 1007.08) | -0.15)  |        | 822.74) | 889.05) | -0.18)  |        |
|                            |   |   |   |   | 285.02   | 301.78   | 0.20    |        | 49.46    | 52.43    | 0.21    |        | 0.58    | 0.60    | 0.11    |        |
| Tonga                      | — | — | — | — | (233.25, | (249.89, | (0.19,  | <0.001 | (28.33,  | (31.86,  | (0.13,  | <0.001 | (0.00,  | (0.00,  | (0.01,  | 0.037  |
|                            |   |   |   |   | 346.77)  | 361.91)  | 0.20)   |        | 82.06)   | 81.90)   | 0.28)   |        | 16.57)  | 12.49)  | 0.22)   |        |
|                            |   |   |   |   | 268.46   | 290.62   | 0.27    |        | 65.91    | 99.68    | 1.53    |        | 0.88    | 1.44    | 1.79    |        |
| Trinidad and Tobago        | — | — | — | — | (254.30, | (275.85, | (0.25,  | <0.001 | (58.92,  | (91.36,  | (1.13,  | <0.001 | (0.25,  | (0.62,  | (1.33,  | <0.001 |

|                              |   |   |   |   |          |          |         |        |          |         |         |        |         |        |         |        |
|------------------------------|---|---|---|---|----------|----------|---------|--------|----------|---------|---------|--------|---------|--------|---------|--------|
|                              |   |   |   |   | 283.23)  | 306.01)  | 0.29)   |        | 73.53)   | 108.62) | 1.92)   |        | 2.24)   | 2.97)  | 2.25)   |        |
|                              |   |   |   |   | 438.93   | 491.50   | 0.39    |        | 65.71    | 68.63   | 0.15    |        | 0.71    | 0.71   | -0.00   |        |
| Tunisia                      | — | — | — | — | (431.86, | (484.93, | (0.37,  | <0.001 | (62.95,  | (66.22, | (-0.04, | 0.117  | (0.45,  | (0.49, | (-0.19, | 0.980  |
|                              |   |   |   |   | 446.11)  | 498.15)  | 0.41)   |        | 68.58)   | 71.10)  | 0.34)   |        | 1.08)   | 1.01)  | 0.19)   |        |
|                              |   |   |   |   | 554.86   | 528.19   | -0.18   |        | 98.13    | 59.77   | -1.76   |        | 1.16    | 0.52   | -2.77   |        |
| Turkey                       | — | — | — | — | (551.87, | (525.75, | (-0.19, | <0.001 | (96.86,  | (58.95, | (-2.01, | <0.001 | (1.02,  | (0.45, | (-3.22, | <0.001 |
|                              |   |   |   |   | 557.87)  | 530.63)  | -0.16)  |        | 99.41)   | 60.60)  | -1.50)  |        | 1.30)   | 0.60)  | -2.32)  |        |
|                              |   |   |   |   | 84.67    | 90.08    | 0.22    |        | 95.53    | 94.60   | -0.16   |        | 1.53    | 1.48   | -0.25   |        |
| Turkmenistan                 | — | — | — | — | (80.20,  | (85.96,  | (0.19,  | <0.001 | (90.58,  | (90.42, | (-0.71, | 0.583  | (0.95,  | (1.00, | (-0.83, | 0.396  |
|                              |   |   |   |   | 89.35)   | 94.36)   | 0.26)   |        | 100.71)  | 98.92)  | 0.40)   |        | 2.34)   | 2.11)  | 0.33)   |        |
|                              |   |   |   |   | 127.65   | 139.57   | 0.31    |        | 87.52    | 81.90   | -0.23   |        | 1.36    | 1.25   | -0.28   |        |
| Tuvalu                       | — | — | — | — | (39.07,  | (55.43,  | (0.29,  | <0.001 | (18.89,  | (21.43, | (-0.28, | <0.001 | (0.00,  | (0.00, | (-0.34, | <0.001 |
|                              |   |   |   |   | 311.21)  | 297.14)  | 0.32)   |        | 253.83)  | 220.08) | -0.18)  |        | 111.30) | 92.05) | -0.22)  |        |
|                              |   |   |   |   | 500.48   | 544.44   | 0.30    |        | 83.94    | 89.46   | 0.20    |        | 0.97    | 1.01   | 0.09    |        |
| Uganda                       | — | — | — | — | (494.90, | (540.76, | (0.27,  | <0.001 | (81.58,  | (87.93, | (-0.09, | 0.181  | (0.72,  | (0.85, | (-0.34, | 0.698  |
|                              |   |   |   |   | 506.12)  | 548.14)  | 0.33)   |        | 86.36)   | 91.01)  | 0.48)   |        | 1.28)   | 1.19)  | 0.51)   |        |
|                              |   |   |   |   | 80.34    | 82.57    | 0.10    |        | 32.83    | 64.67   | 2.12    |        | 0.48    | 1.04   | 2.62    |        |
| Ukraine                      | — | — | — | — | (79.05,  | (80.97,  | (0.06,  | <0.001 | (32.02,  | (63.40, | (0.14,  | 0.036  | (0.39,  | (0.89, | (0.05,  | 0.046  |
|                              |   |   |   |   | 81.66)   | 84.20)   | 0.14)   |        | 33.65)   | 65.96)  | 4.15)   |        | 0.59)   | 1.22)  | 5.26)   |        |
|                              |   |   |   |   | 68.13    | 68.98    | 0.03    |        | 20.72    | 19.57   | -0.24   |        | 0.28    | 0.26   | -0.22   |        |
| United Arab Emirates         | — | — | — | — | (62.83,  | (65.76,  | (-0.00, | 0.074  | (17.87,  | (17.94, | (-0.45, | 0.021  | (0.05,  | (0.11, | (-0.70, | 0.375  |
|                              |   |   |   |   | 73.84)   | 72.35)   | 0.06)   |        | 23.98)   | 21.34)  | -0.04)  |        | 1.08)   | 0.59)  | 0.27)   |        |
|                              |   |   |   |   | 368.89   | 373.72   | 0.05    |        | 54.49    | 58.21   | 0.25    |        | 0.59    | 0.66   | 0.48    |        |
| United Kingdom               | — | — | — | — | (366.29, | (371.15, | (0.03,  | <0.001 | (53.49,  | (57.22, | (-0.09, | 0.144  | (0.49,  | (0.56, | (-0.06, | 0.080  |
|                              |   |   |   |   | 371.49)  | 376.30)  | 0.06)   |        | 55.50)   | 59.21)  | 0.59)   |        | 0.70)   | 0.78)  | 1.01)   |        |
|                              |   |   |   |   | 475.01   | 561.68   | 0.58    |        | 102.32   | 90.42   | -0.41   |        | 1.29    | 1.00   | -0.84   |        |
| United Republic of Tanzania  | — | — | — | — | (470.61, | (558.53, | (0.56,  | <0.001 | (100.22, | (89.14, | (-0.59, | <0.001 | (1.06,  | (0.87, | (-0.98, | <0.001 |
|                              |   |   |   |   | 479.45)  | 564.84)  | 0.60)   |        | 104.45)  | 91.72)  | -0.24)  |        | 1.56)   | 1.15)  | -0.71)  |        |
|                              |   |   |   |   | 497.34   | 348.97   | -1.20   |        | 63.46    | 61.58   | -0.09   |        | 0.63    | 0.74   | 0.59    |        |
| United States of America     | — | — | — | — | (495.97, | (347.87, | (-1.23, | <0.001 | (62.98,  | (61.12, | (-0.32, | 0.460  | (0.58,  | (0.69, | (0.36,  | <0.001 |
|                              |   |   |   |   | 498.71)  | 350.07)  | -1.17)  |        | 63.95)   | 62.04)  | 0.14)   |        | 0.68)   | 0.79)  | 0.82)   |        |
|                              |   |   |   |   | 265.58   | 275.32   | 0.12    |        | 90.46    | 63.65   | -1.19   |        | 1.29    | 0.83   | -1.50   |        |
| United States Virgin Islands | — | — | — | — | (217.08, | (219.11, | (0.11,  | <0.001 | (63.23,  | (38.66, | (-1.58, | <0.001 | (0.00,  | (0.00, | (-1.96, | <0.001 |

|              |   |   |   |   |          |          |         |        |          |          |         |        |        |        |         |        |
|--------------|---|---|---|---|----------|----------|---------|--------|----------|----------|---------|--------|--------|--------|---------|--------|
|              |   |   |   |   | 321.97)  | 341.85)  | 0.14)   |        | 125.79)  | 99.22)   | -0.80)  |        | 12.67) | 14.78) | -1.03)  |        |
|              |   |   |   |   | 234.37   | 278.69   | 0.60    |        | 47.55    | 37.17    | -0.86   |        | 0.59   | 0.38   | -1.53   |        |
| Uruguay      | — | — | — | — | (225.57, | (269.31, | (0.59,  | <0.001 | (43.62,  | (33.82,  | (-1.20, | <0.001 | (0.23, | (0.11, | (-2.05, | <0.001 |
|              |   |   |   |   | 243.42)  | 288.31)  | 0.61)   |        | 51.74)   | 40.78)   | -0.52)  |        | 1.24)  | 0.92)  | -1.00)  |        |
|              |   |   |   |   | 77.25    | 92.74    | 0.63    |        | 38.51    | 45.46    | 0.62    |        | 0.58   | 0.68   | 0.61    |        |
| Uzbekistan   | — | — | — | — | (75.43,  | (91.15,  | (0.60,  | <0.001 | (37.18,  | (44.36,  | (0.28,  | <0.001 | (0.42, | (0.55, | (0.15,  | 0.009  |
|              |   |   |   |   | 79.11)   | 94.35)   | 0.66)   |        | 39.88)   | 46.58)   | 0.96)   |        | 0.77)  | 0.83)  | 1.06)   |        |
|              |   |   |   |   | 110.41   | 113.28   | 0.09    |        | 69.35    | 86.29    | 0.71    |        | 1.08   | 1.35   | 0.73    |        |
| Vanuatu      | — | — | — | — | (85.52,  | (95.09,  | (0.08,  | <0.001 | (49.12,  | (70.10,  | (0.51,  | <0.001 | (0.00, | (0.10, | (0.49,  | <0.001 |
|              |   |   |   |   | 140.89)  | 134.16)  | 0.09)   |        | 95.55)   | 105.29)  | 0.91)   |        | 9.81)  | 6.08)  | 0.97)   |        |
| Venezuela    |   |   |   |   | 120.69   | 154.77   | 0.86    |        | 32.34    | 30.78    | -0.32   |        | 0.43   | 0.37   | -0.71   |        |
| (Bolivarian  | — | — | — | — | (118.34, | (152.40, | (0.81,  | <0.001 | (31.10,  | (29.73,  | (-1.15, | 0.448  | (0.30, | (0.27, | (-1.78, | 0.200  |
| Republic of) |   |   |   |   | 123.09)  | 157.17)  | 0.92)   |        | 33.63)   | 31.85)   | 0.51)   |        | 0.61)  | 0.51)  | 0.38)   |        |
|              |   |   |   |   | 185.04   | 209.74   | 0.43    |        | 43.29    | 38.98    | -0.37   |        | 0.57   | 0.46   | -0.72   |        |
| Viet Nam     | — | — | — | — | (183.46, | (208.29, | (0.42,  | <0.001 | (42.51,  | (38.36,  | (-0.45, | <0.001 | (0.48, | (0.40, | (-0.80, | <0.001 |
|              |   |   |   |   | 186.63)  | 211.21)  | 0.45)   |        | 44.08)   | 39.60)   | -0.29)  |        | 0.67)  | 0.53)  | -0.64)  |        |
|              |   |   |   |   | 303.68   | 329.74   | 0.28    |        | 73.87    | 84.73    | 0.52    |        | 1.00   | 1.14   | 0.52    |        |
| Yemen        | — | — | — | — | (298.64, | (326.63, | (0.26,  | <0.001 | (71.30,  | (83.12,  | (0.18,  | 0.003  | (0.71, | (0.96, | (0.13,  | 0.009  |
|              |   |   |   |   | 308.78)  | 332.88)  | 0.30)   |        | 76.52)   | 86.35)   | 0.86)   |        | 1.36)  | 1.35)  | 0.91)   |        |
|              |   |   |   |   | 392.91   | 455.99   | 0.51    |        | 90.50    | 88.24    | -0.10   |        | 1.16   | 1.07   | -0.30   |        |
| Zambia       | — | — | — | — | (385.67, | (451.16, | (0.49,  | <0.001 | (86.91,  | (86.08,  | (-0.25, | 0.213  | (0.78, | (0.84, | (-0.52, | 0.008  |
|              |   |   |   |   | 400.27)  | 460.86)  | 0.54)   |        | 94.22)   | 90.45)   | 0.06)   |        | 1.69)  | 1.35)  | -0.08)  |        |
|              |   |   |   |   | 594.03   | 591.85   | -0.02   |        | 107.79   | 149.43   | 1.13    |        | 1.30   | 2.01   | 1.53    |        |
| Zimbabwe     | — | — | — | — | (586.47, | (585.86, | (-0.06, | 0.310  | (104.39, | (146.32, | (0.68,  | <0.001 | (0.94, | (1.66, | (1.02,  | <0.001 |
|              |   |   |   |   | 601.67)  | 597.89)  | 0.02)   |        | 111.28)  | 152.58)  | 1.60)   |        | 1.76)  | 2.41)  | 2.04)   |        |
| <b>Women</b> |   |   |   |   |          |          |         |        |          |          |         |        |        |        |         |        |
|              |   |   |   |   | 196.23   | 211.29   | 0.25    |        | 142.51   | 126.05   | -0.40   |        | 2.25   | 1.97   | -0.42   |        |
| Afghanistan  | — | — | — | — | (189.94, | (207.85, | (0.22,  | <0.001 | (136.81, | (123.23, | (-0.56, | <0.001 | (1.58, | (1.62, | (-0.59, | <0.001 |
|              |   |   |   |   | 202.71)  | 214.79)  | 0.27)   |        | 148.41)  | 128.94)  | -0.23)  |        | 3.15)  | 2.38)  | -0.25)  |        |
|              |   |   |   |   | 752.20   | 782.47   | 0.14    |        | 96.55    | 96.35    | -0.08   |        | 0.93   | 0.90   | -0.30   |        |
| Albania      | — | — | — | — | (732.11, | (757.20, | (0.12,  | <0.001 | (89.34,  | (87.64,  | (-0.43, | 0.657  | (0.35, | (0.26, | (-0.77, | 0.213  |
|              |   |   |   |   | 772.75)  | 808.40)  | 0.17)   |        | 104.23)  | 105.72)  | 0.27)   |        | 2.07)  | 2.30)  | 0.17)   |        |
| Algeria      | — | — | — | — | 406.07   | 427.85   | 0.18    | <0.001 | 105.43   | 77.02    | -1.09   | <0.001 | 1.41   | 0.92   | -1.45   | <0.001 |

|                     |   |   |   |   |          |          |         |        |          |          |         |        |        |        |         |        |
|---------------------|---|---|---|---|----------|----------|---------|--------|----------|----------|---------|--------|--------|--------|---------|--------|
|                     |   |   |   |   | (400.31, | (423.43, | (0.16,  |        | (102.45, | (75.17,  | (-1.28, |        | (1.08, | (0.73, | (-1.65, |        |
|                     |   |   |   |   | 411.89)  | 432.32)  | 0.19)   |        | 108.48)  | 78.91)   | -0.90)  |        | 1.82)  | 1.14)  | -1.24)  |        |
|                     |   |   |   |   | 191.83   | 196.57   | 0.08    |        | 46.83    | 55.89    | 0.67    |        | 0.61   | 0.76   | 0.91    |        |
| American Samoa      | — | — | — | — | (116.32, | (120.98, | (0.07,  | <0.001 | (14.13,  | (19.22,  | (0.45,  | <0.001 | (0.00, | (0.00, | (0.64,  | <0.001 |
|                     |   |   |   |   | 302.76)  | 306.14)  | 0.09)   |        | 119.20)  | 130.47)  | 0.90)   |        | 48.85) | 47.08) | 1.19)   |        |
|                     |   |   |   |   | 312.74   | 296.86   | -0.20   |        | 38.40    | 32.83    | -0.54   |        | 0.37   | 0.29   | -0.82   |        |
| Andorra             | — | — | — | — | (219.62, | (206.62, | (-0.26, | <0.001 | (11.49,  | (8.94,   | (-0.59, | <0.001 | (0.00, | (0.00, | (-1.02, | <0.001 |
|                     |   |   |   |   | 436.27)  | 416.22)  | -0.13)  |        | 100.17)  | 89.61)   | -0.48)  |        | 43.38) | 40.07) | -0.63)  |        |
|                     |   |   |   |   | 561.90   | 660.54   | 0.59    |        | 86.28    | 77.69    | -0.35   |        | 0.95   | 0.72   | -0.98   |        |
| Angola              | — | — | — | — | (551.38, | (653.93, | (0.45,  | <0.001 | (82.10,  | (75.39,  | (-0.88, | 0.186  | (0.55, | (0.51, | (-1.73, | 0.011  |
|                     |   |   |   |   | 572.58)  | 667.22)  | 0.74)   |        | 90.63)   | 80.05)   | 0.17)   |        | 1.54)  | 0.99)  | -0.23)  |        |
|                     |   |   |   |   | 639.35   | 659.99   | 0.11    |        | 129.48   | 90.25    | -1.30   |        | 1.62   | 0.93   | -2.13   |        |
| Antigua and Barbuda | — | — | — | — | (510.61, | (544.83, | (0.10,  | <0.001 | (75.39,  | (51.54,  | (-1.61, | <0.001 | (0.00, | (0.00, | (-2.53, | <0.001 |
|                     |   |   |   |   | 791.84)  | 793.25)  | 0.12)   |        | 208.70)  | 148.04)  | -1.00)  |        | 34.38) | 25.81) | -1.73)  |        |
|                     |   |   |   |   | 359.23   | 492.23   | 1.10    |        | 96.28    | 68.90    | -1.12   |        | 1.29   | 0.71   | -1.99   |        |
| Argentina           | — | — | — | — | (354.51, | (487.59, | (1.06,  | <0.001 | (93.83,  | (67.18,  | (-1.49, | <0.001 | (1.02, | (0.55, | (-2.52, | <0.001 |
|                     |   |   |   |   | 363.99)  | 496.90)  | 1.13)   |        | 98.77)   | 70.66)   | -0.75)  |        | 1.61)  | 0.91)  | -1.46)  |        |
|                     |   |   |   |   | 127.87   | 128.05   | 0.01    |        | 30.46    | 22.47    | -0.97   |        | 0.39   | 0.26   | -1.26   |        |
| Armenia             | — | — | — | — | (119.80, | (118.58, | (-0.02, | 0.542  | (26.57,  | (18.70,  | (-1.74, | 0.016  | (0.07, | (0.02, | (-2.18, | 0.008  |
|                     |   |   |   |   | 136.36)  | 138.17)  | 0.04)   |        | 34.79)   | 26.91)   | -0.18)  |        | 1.22)  | 1.42)  | -0.33)  |        |
|                     |   |   |   |   | 296.87   | 284.49   | -0.15   |        | 35.75    | 37.20    | 0.11    |        | 0.33   | 0.38   | 0.44    |        |
| Australia           | — | — | — | — | (291.14, | (279.48, | (-0.20, | <0.001 | (33.78,  | (35.40,  | (-0.35, | 0.635  | (0.17, | (0.22, | (-0.48, | 0.349  |
|                     |   |   |   |   | 302.68)  | 289.58)  | -0.10)  |        | 37.81)   | 39.08)   | 0.57)   |        | 0.59)  | 0.62)  | 1.36)   |        |
|                     |   |   |   |   | 514.34   | 476.40   | -0.27   |        | 64.95    | 41.78    | -1.58   |        | 0.63   | 0.27   | -2.95   |        |
| Austria             | — | — | — | — | (502.77, | (464.65, | (-0.30, | <0.001 | (60.88,  | (38.38,  | (-2.00, | <0.001 | (0.29, | (0.07, | (-3.69, | <0.001 |
|                     |   |   |   |   | 526.13)  | 488.40)  | -0.25)  |        | 69.24)   | 45.44)   | -1.16)  |        | 1.21)  | 0.78)  | -2.21)  |        |
|                     |   |   |   |   | 131.43   | 136.96   | 0.16    |        | 52.12    | 45.10    | -0.52   |        | 0.74   | 0.62   | -0.63   |        |
| Azerbaijan          | — | — | — | — | (125.92, | (131.81, | (0.07,  | <0.001 | (48.65,  | (42.22,  | (-1.09, | 0.073  | (0.38, | (0.33, | (-1.20, | 0.034  |
|                     |   |   |   |   | 137.14)  | 142.27)  | 0.25)   |        | 55.80)   | 48.14)   | 0.05)   |        | 1.33)  | 1.10)  | -0.05)  |        |
|                     |   |   |   |   | 350.38   | 362.16   | 0.11    |        | 154.26   | 149.73   | -0.08   |        | 2.33   | 2.23   | -0.14   |        |
| Bahamas             | — | — | — | — | (304.55, | (320.62, | (0.09,  | <0.001 | (123.85, | (123.73, | (-0.28, | 0.469  | (0.13, | (0.22, | (-0.37, | 0.232  |
|                     |   |   |   |   | 401.59)  | 407.70)  | 0.13)   |        | 190.27)  | 179.75)  | 0.13)   |        | 11.56) | 9.09)  | 0.09)   |        |
|                     |   |   |   |   | 417.34   | 442.95   | 0.20    | <0.001 | 69.19    | 49.53    | -1.17   | 0.004  | 0.76   | 0.43   | -2.00   | 0.011  |

|                |   |   |   |   |          |          |         |        |          |          |         |        |        |        |         |        |
|----------------|---|---|---|---|----------|----------|---------|--------|----------|----------|---------|--------|--------|--------|---------|--------|
|                |   |   |   |   | (377.66, | (416.85, | (0.19,  |        | (53.56,  | (40.99,  | (-1.97, |        | (0.01, | (0.01, | (-3.53, |        |
|                |   |   |   |   | 460.32)  | 470.40)  | 0.22)   |        | 88.24)   | 59.47)   | -0.37)  |        | 5.99)  | 2.73)  | -0.46)  |        |
|                |   |   |   |   | 264.85   | 285.71   | 0.26    |        | 92.59    | 56.60    | -1.59   |        | 1.31   | 0.68   | -2.13   |        |
| Bangladesh     | — | — | — | — | (262.59, | (283.94, | (0.25,  | <0.001 | (91.24,  | (55.82,  | (-1.80, | <0.001 | (1.15, | (0.60, | (-2.90, | <0.001 |
|                |   |   |   |   | 267.13)  | 287.49)  | 0.28)   |        | 93.95)   | 57.40)   | -1.37)  |        | 1.48)  | 0.78)  | -1.35)  |        |
|                |   |   |   |   | 440.96   | 455.03   | 0.11    |        | 100.74   | 93.09    | -0.28   |        | 1.29   | 1.16   | -0.40   |        |
| Barbados       | — | — | — | — | (387.42, | (397.91, | (0.09,  | <0.001 | (76.07,  | (68.47,  | (-0.61, | 0.093  | (0.01, | (0.00, | (-0.82, | 0.066  |
|                |   |   |   |   | 500.01)  | 518.33)  | 0.13)   |        | 131.07)  | 124.05)  | 0.05)   |        | 9.64)  | 10.37) | 0.03)   |        |
|                |   |   |   |   | 118.78   | 125.83   | 0.21    |        | 37.57    | 41.36    | 0.31    |        | 0.53   | 0.59   | 0.34    |        |
| Belarus        | — | — | — | — | (113.98, | (119.91, | (0.17,  | <0.001 | (34.93,  | (38.17,  | (-0.94, | 0.631  | (0.26, | (0.27, | (-0.77, | 0.552  |
|                |   |   |   |   | 123.74)  | 131.99)  | 0.24)   |        | 40.37)   | 44.78)   | 1.57)   |        | 0.97)  | 1.18)  | 1.46)   |        |
|                |   |   |   |   | 533.40   | 587.12   | 0.33    |        | 66.02    | 50.62    | -0.91   |        | 0.64   | 0.33   | -2.27   |        |
| Belgium        | — | — | — | — | (522.93, | (575.83, | (0.29,  | <0.001 | (62.38,  | (47.36,  | (-1.27, | <0.001 | (0.33, | (0.12, | (-3.05, | <0.001 |
|                |   |   |   |   | 544.03)  | 598.58)  | 0.37)   |        | 69.83)   | 54.06)   | -0.56)  |        | 1.14)  | 0.75)  | -1.48)  |        |
|                |   |   |   |   | 333.48   | 477.02   | 1.23    |        | 93.07    | 124.62   | 0.90    |        | 1.27   | 1.67   | 0.79    |        |
| Belize         | — | — | — | — | (279.10, | (433.22, | (1.18,  | <0.001 | (63.27,  | (102.41, | (0.32,  | 0.002  | (0.00, | (0.11, | (-0.01, | 0.052  |
|                |   |   |   |   | 397.34)  | 524.22)  | 1.27)   |        | 133.68)  | 150.35)  | 1.49)   |        | 17.37) | 7.56)  | 1.59)   |        |
|                |   |   |   |   | 755.64   | 849.05   | 0.40    |        | 116.00   | 99.56    | -0.49   |        | 1.28   | 0.91   | -1.11   |        |
| Benin          | — | — | — | — | (737.99, | (837.64, | (0.38,  | <0.001 | (109.02, | (95.61,  | (-0.66, | <0.001 | (0.64, | (0.56, | (-1.36, | <0.001 |
|                |   |   |   |   | 773.66)  | 860.60)  | 0.43)   |        | 123.33)  | 103.64)  | -0.33)  |        | 2.33)  | 1.40)  | -0.86)  |        |
|                |   |   |   |   | 618.09   | 637.64   | 0.10    |        | 101.23   | 75.04    | -1.14   |        | 1.14   | 0.69   | -1.88   |        |
| Bermuda        | — | — | — | — | (489.64, | (483.70, | (0.10,  | <0.001 | (54.27,  | (29.87,  | (-1.43, | <0.001 | (0.00, | (0.00, | (-2.46, | <0.001 |
|                |   |   |   |   | 774.22)  | 829.22)  | 0.11)   |        | 178.26)  | 162.02)  | -0.86)  |        | 42.86) | 53.77) | -1.30)  |        |
|                |   |   |   |   | 139.29   | 153.32   | 0.34    |        | 50.41    | 37.99    | -1.00   |        | 0.73   | 0.50   | -1.30   |        |
| Bhutan         | — | — | — | — | (118.34, | (134.99, | (0.31,  | <0.001 | (37.80,  | (29.17,  | (-1.25, | <0.001 | (0.01, | (0.01, | (-1.69, | <0.001 |
|                |   |   |   |   | 163.26)  | 173.49)  | 0.37)   |        | 66.22)   | 48.69)   | -0.74)  |        | 5.69)  | 3.30)  | -0.90)  |        |
|                |   |   |   |   | 214.17   | 277.66   | 0.90    |        | 99.94    | 56.77    | -1.93   |        | 1.47   | 0.70   | -2.50   |        |
| Bolivia        | — | — | — | — | (206.44, | (271.12, | (0.87,  | <0.001 | (94.42,  | (53.80,  | (-2.13, | <0.001 | (0.86, | (0.40, | (-2.76, | <0.001 |
| (Plurinational |   |   |   |   | 222.14)  | 284.32)  | 0.92)   |        | 105.71)  | 59.86)   | -1.74)  |        | 2.35)  | 1.13)  | -2.24)  |        |
| State of)      |   |   |   |   | 382.05   | 380.59   | -0.00   |        | 52.48    | 30.84    | -1.82   |        | 0.54   | 0.17   | -3.89   |        |
| Bosnia and     | — | — | — | — | (369.52, | (363.41, | (-0.05, | 0.970  | (47.93,  | (26.15,  | (-2.26, | <0.001 | (0.18, | (0.00, | (-4.66, | <0.001 |
| Herzegovina    |   |   |   |   | 394.90)  | 398.39)  | 0.04)   |        | 57.36)   | 36.18)   | -1.37)  |        | 1.27)  | 1.17)  | -3.10)  |        |
|                |   |   |   |   | 306.25   | 327.99   | 0.23    | <0.001 | 58.66    | 56.10    | -0.14   | 0.379  | 0.72   | 0.65   | -0.34   | 0.298  |
| Botswana       | — | — | — | — |          |          |         |        |          |          |         |        |        |        |         |        |



|                          |   |   |   |   |          |          |         |        |          |          |         |        |        |        |         |        |
|--------------------------|---|---|---|---|----------|----------|---------|--------|----------|----------|---------|--------|--------|--------|---------|--------|
|                          |   |   |   |   | (285.83, | (312.64, | (0.22,  |        | (49.54,  | (49.92,  | (-0.46, |        | (0.07, | (0.16, | (-0.98, |        |
|                          |   |   |   |   | 327.89)  | 343.91)  | 0.24)   |        | 69.11)   | 62.85)   | 0.17)   |        | 3.09)  | 1.81)  | 0.30)   |        |
|                          |   |   |   |   | 347.06   | 385.69   | 0.37    |        | 69.67    | 68.47    | -0.03   |        | 0.87   | 0.81   | -0.22   |        |
| Brazil                   | — | — | — | — | (345.03, | (383.82, | (0.34,  | <0.001 | (68.74,  | (67.70,  | (-0.22, | 0.730  | (0.77, | (0.73, | (-0.44, | 0.050  |
|                          |   |   |   |   | 349.11)  | 387.56)  | 0.40)   |        | 70.61)   | 69.25)   | 0.15)   |        | 0.98)  | 0.90)  | 0.00)   |        |
|                          |   |   |   |   | 123.99   | 122.11   | -0.06   |        | 39.08    | 28.68    | -1.10   |        | 0.55   | 0.37   | -1.40   |        |
| Brunei Darussalam        | — | — | — | — | (97.00,  | (100.91, | (-0.07, | <0.001 | (24.56,  | (18.96,  | (-1.22, | <0.001 | (0.00, | (0.00, | (-1.57, | <0.001 |
|                          |   |   |   |   | 156.52)  | 146.73)  | -0.04)  |        | 59.40)   | 41.98)   | -0.98)  |        | 8.41)  | 5.42)  | -1.22)  |        |
|                          |   |   |   |   | 937.77   | 947.77   | 0.05    |        | 175.46   | 132.09   | -0.93   |        | 2.10   | 1.37   | -1.46   |        |
| Bulgaria                 | — | — | — | — | (921.95, | (926.88, | (0.02,  | 0.001  | (168.77, | (124.70, | (-1.42, | <0.001 | (1.44, | (0.74, | (-2.19, | <0.001 |
|                          |   |   |   |   | 953.79)  | 969.03)  | 0.07)   |        | 182.35)  | 139.84)  | -0.44)  |        | 2.98)  | 2.38)  | -0.71)  |        |
|                          |   |   |   |   | 646.25   | 695.00   | 0.26    |        | 119.29   | 98.81    | -0.63   |        | 1.45   | 1.04   | -1.12   |        |
| Burkina Faso             | — | — | — | — | (634.28, | (687.27, | (0.24,  | <0.001 | (114.03, | (95.86,  | (-0.81, | <0.001 | (0.91, | (0.75, | (-1.37, | <0.001 |
|                          |   |   |   |   | 658.41)  | 702.80)  | 0.27)   |        | 124.74)  | 101.83)  | -0.45)  |        | 2.20)  | 1.40)  | -0.88)  |        |
|                          |   |   |   |   | 572.79   | 656.28   | 0.46    |        | 163.65   | 99.68    | -1.72   |        | 2.24   | 1.08   | -2.54   |        |
| Burundi                  | — | — | — | — | (558.38, | (645.88, | (0.42,  | <0.001 | (155.87, | (95.61,  | (-1.94, | <0.001 | (1.40, | (0.69, | (-2.70, | <0.001 |
|                          |   |   |   |   | 587.51)  | 666.82)  | 0.50)   |        | 171.74)  | 103.90)  | -1.49)  |        | 3.42)  | 1.62)  | -2.39)  |        |
|                          |   |   |   |   | 1338.78  | 1501.23  | 0.41    |        | 182.03   | 131.28   | -1.14   |        | 1.86   | 0.84   | -2.75   |        |
| Cabo Verde               | — | — | — | — | (1252.58 | (1432.54 | (0.37,  | <0.001 | (150.40, | (111.57, | (-1.34, | <0.001 | (0.07, | (0.02, | (-3.15, | <0.001 |
|                          |   |   |   |   | ,        | ,        | 0.45)   |        | 219.18)  | 153.55)  | -0.93)  |        | 11.29) | 4.85)  | -2.34)  |        |
|                          |   |   |   |   | 1430.16) | 1572.43) |         |        |          |          |         |        |        |        |         |        |
|                          |   |   |   |   | 83.80    | 90.90    | 0.28    |        | 43.01    | 27.74    | -1.48   |        | 0.66   | 0.39   | -1.78   |        |
| Cambodia                 | — | — | — | — | (79.87,  | (87.79,  | (0.26,  | <0.001 | (40.14,  | (26.03,  | (-1.54, | <0.001 | (0.35, | (0.21, | (-1.90, | <0.001 |
|                          |   |   |   |   | 87.89)   | 94.10)   | 0.30)   |        | 46.03)   | 29.53)   | -1.41)  |        | 1.15)  | 0.66)  | -1.67)  |        |
|                          |   |   |   |   | 623.13   | 754.18   | 0.67    |        | 131.21   | 106.24   | -0.72   |        | 1.67   | 1.11   | -1.40   |        |
| Cameroon                 | — | — | — | — | (612.11, | (747.30, | (0.61,  | <0.001 | (126.02, | (103.63, | (-0.84, | <0.001 | (1.12, | (0.85, | (-1.54, | <0.001 |
|                          |   |   |   |   | 634.32)  | 761.10)  | 0.74)   |        | 136.58)  | 108.91)  | -0.60)  |        | 2.41)  | 1.43)  | -1.26)  |        |
|                          |   |   |   |   | 861.14   | 839.94   | -0.08   |        | 72.36    | 70.54    | -0.05   |        | 0.44   | 0.43   | -0.07   |        |
| Canada                   | — | — | — | — | (853.57, | (832.56, | (-0.11, | <0.001 | (70.17,  | (68.41,  | (-0.22, | 0.607  | (0.28, | (0.28, | (-0.61, | 0.810  |
|                          |   |   |   |   | 868.77)  | 847.37)  | -0.06)  |        | 74.61)   | 72.72)   | 0.13)   |        | 0.65)  | 0.64)  | 0.48)   |        |
|                          |   |   |   |   | 524.77   | 536.40   | 0.08    |        | 88.22    | 84.52    | -0.09   |        | 1.03   | 0.95   | -0.23   |        |
| Central African Republic | — | — | — | — | (505.41, | (522.71, | (0.01,  | 0.032  | (80.15,  | (78.99,  | (-0.19, | 0.088  | (0.33, | (0.44, | (-0.40, | 0.006  |
|                          |   |   |   |   | 544.77)  | 550.38)  | 0.15)   |        | 96.96)   | 90.36)   | 0.01)   |        | 2.54)  | 1.82)  | -0.07)  |        |

|               |   |   |   |   |          |          |         |        |          |         |         |        |         |         |         |        |
|---------------|---|---|---|---|----------|----------|---------|--------|----------|---------|---------|--------|---------|---------|---------|--------|
|               |   |   |   |   | 601.45   | 651.76   | 0.28    |        | 115.06   | 93.76   | -0.70   |        | 1.41    | 0.99    | -1.19   |        |
| Chad          | — | — | — | — | (586.99, | (642.50, | (0.25,  | <0.001 | (108.62, | (90.19, | (-0.85, | <0.001 | (0.77,  | (0.65,  | (-1.40, | <0.001 |
|               |   |   |   |   | 616.19)  | 661.13)  | 0.32)   |        | 121.80)  | 97.46)  | -0.54)  |        | 2.38)   | 1.47)   | -0.98)  |        |
|               |   |   |   |   | 306.08   | 371.15   | 0.67    |        | 39.68    | 44.39   | 0.38    |        | 0.39    | 0.41    | 0.27    |        |
| Chile         | — | — | — | — | (299.80, | (364.70, | (0.64,  | <0.001 | (37.41,  | (42.18, | (0.17,  | 0.001  | (0.20,  | (0.23,  | (-0.03, | 0.074  |
|               |   |   |   |   | 312.46)  | 377.69)  | 0.70)   |        | 42.05)   | 46.68)  | 0.59)   |        | 0.70)   | 0.70)   | 0.57)   |        |
|               |   |   |   |   | 60.29    | 94.76    | 1.49    |        | 20.31    | 14.55   | -1.27   |        | 0.28    | 0.15    | -2.21   |        |
| China         | — | — | — | — | (59.99,  | (94.36,  | (1.20,  | <0.001 | (20.14,  | (14.39, | (-1.83, | <0.001 | (0.26,  | (0.14,  | (-3.00, | <0.001 |
|               |   |   |   |   | 60.59)   | 95.16)   | 1.78)   |        | 20.48)   | 14.70)  | -0.71)  |        | 0.30)   | 0.17)   | -1.42)  |        |
|               |   |   |   |   | 415.51   | 461.48   | 0.37    |        | 68.42    | 57.02   | -0.61   |        | 0.78    | 0.54    | -1.26   |        |
| Colombia      | — | — | — | — | (410.79, | (457.19, | (0.35,  | <0.001 | (66.49,  | (55.52, | (-0.99, | 0.001  | (0.58,  | (0.41,  | (-1.94, | <0.001 |
|               |   |   |   |   | 420.28)  | 465.80)  | 0.38)   |        | 70.40)   | 58.55)  | -0.24)  |        | 1.03)   | 0.71)   | -0.56)  |        |
|               |   |   |   |   | 624.31   | 707.20   | 0.43    |        | 119.22   | 105.78  | -0.43   |        | 1.44    | 1.13    | -0.85   |        |
| Comoros       | — | — | — | — | (571.98, | (664.62, | (0.41,  | <0.001 | (96.65,  | (89.67, | (-2.37, | 0.669  | (0.05,  | (0.09,  | (-3.70, | 0.566  |
|               |   |   |   |   | 680.62)  | 751.90)  | 0.46)   |        | 145.96)  | 124.07) | 1.55)   |        | 8.38)   | 4.86)   | 2.08)   |        |
|               |   |   |   |   | 580.51   | 633.96   | 0.31    |        | 91.95    | 79.94   | -0.50   |        | 1.04    | 0.79    | -0.97   |        |
| Congo         | — | — | — | — | (559.10, | (619.11, | (0.29,  | <0.001 | (83.20,  | (74.69, | (-1.07, | 0.083  | (0.30,  | (0.35,  | (-1.68, | 0.008  |
|               |   |   |   |   | 602.61)  | 649.08)  | 0.32)   |        | 101.42)  | 85.47)  | 0.07)   |        | 2.68)   | 1.53)   | -0.25)  |        |
|               |   |   |   |   | 203.22   | 214.18   | 0.18    |        | 67.35    | 41.22   | -1.72   |        | 0.94    | 0.49    | -2.28   |        |
| Cook Islands  | — | — | — | — | (88.00,  | (84.13,  | (0.16,  | <0.001 | (10.88,  | (2.11,  | (-1.93, | <0.001 | (0.00,  | (0.00,  | (-2.57, | <0.001 |
|               |   |   |   |   | 413.63)  | 450.73)  | 0.19)   |        | 230.71)  | 198.23) | -1.51)  |        | 122.67) | 124.82) | -1.99)  |        |
|               |   |   |   |   | 530.50   | 583.29   | 0.33    |        | 71.68    | 77.61   | 0.36    |        | 0.73    | 0.78    | 0.38    |        |
| Costa Rica    | — | — | — | — | (512.92, | (568.32, | (0.31,  | <0.001 | (65.24,  | (72.25, | (-0.01, | 0.059  | (0.22,  | (0.34,  | (-0.27, | 0.250  |
|               |   |   |   |   | 548.56)  | 598.58)  | 0.35)   |        | 78.62)   | 83.29)  | 0.74)   |        | 1.83)   | 1.59)   | 1.03)   |        |
|               |   |   |   |   | 659.13   | 717.55   | 0.29    |        | 116.57   | 92.16   | -0.82   |        | 1.37    | 0.90    | -1.44   |        |
| Cote d'Ivoire | — | — | — | — | (648.66, | (710.38, | (0.24,  | <0.001 | (112.08, | (89.59, | (-0.93, | <0.001 | (0.91,  | (0.66,  | (-1.66, | <0.001 |
|               |   |   |   |   | 669.74)  | 724.78)  | 0.34)   |        | 121.22)  | 94.80)  | -0.70)  |        | 2.00)   | 1.20)   | -1.21)  |        |
|               |   |   |   |   | 277.35   | 255.78   | -0.27   |        | 42.06    | 21.78   | -2.19   |        | 0.47    | 0.14    | -4.49   |        |
| Croatia       | — | — | — | — | (266.52, | (243.27, | (-0.31, | <0.001 | (37.98,  | (18.28, | (-2.63, | <0.001 | (0.14,  | (0.00,  | (-5.28, | <0.001 |
|               |   |   |   |   | 288.53)  | 268.82)  | -0.23)  |        | 46.49)   | 25.81)  | -1.76)  |        | 1.21)   | 1.00)   | -3.69)  |        |
|               |   |   |   |   | 171.49   | 178.84   | 0.14    |        | 29.40    | 27.89   | -0.17   |        | 0.34    | 0.31    | -0.27   |        |
| Cuba          | — | — | — | — | (166.23, | (172.64, | (0.14,  | <0.001 | (27.22,  | (25.48, | (-0.37, | 0.079  | (0.14,  | (0.11,  | (-0.75, | 0.265  |
|               |   |   |   |   | 176.88)  | 185.22)  | 0.15)   |        | 31.71)   | 30.48)  | 0.02)   |        | 0.69)   | 0.71)   | 0.21)   |        |

|                   |   |   |   |   |          |          |         |        |          |          |         |        |        |        |         |        |
|-------------------|---|---|---|---|----------|----------|---------|--------|----------|----------|---------|--------|--------|--------|---------|--------|
|                   |   |   |   |   | 355.14   | 359.21   | 0.03    |        | 49.71    | 35.09    | -1.21   | 0.53   | 0.27   | -2.29  |         |        |
| Cyprus            | — | — | — | — | (325.86, | (336.13, | (-0.01, | 0.139  | (39.14,  | (28.17,  | (-1.65, | <0.001 | (0.01, | (0.00, | (-3.37, | <0.001 |
|                   |   |   |   |   | 386.46)  | 383.78)  | 0.07)   |        | 62.38)   | 43.57)   | -0.78)  |        | 3.71)  | 2.92)  | -1.19)  |        |
|                   |   |   |   |   | 1003.06  | 962.71   | -0.13   |        | 115.43   | 78.36    | -1.44   |        | 1.07   | 0.46   | -2.92   |        |
| Czechia           | — | — | — | — | (988.41, | (946.56, | (-0.16, | <0.001 | (110.57, | (73.89,  | (-1.58, | <0.001 | (0.66, | (0.19, | (-3.44, | <0.001 |
|                   |   |   |   |   | 1017.89) | 979.10)  | -0.11)  |        | 120.46)  | 83.06)   | -1.30)  |        | 1.66)  | 0.99)  | -2.40)  |        |
| Democratic        |   |   |   |   | 76.32    | 75.75    | -0.03   |        | 24.12    | 19.32    | -0.77   |        | 0.33   | 0.25   | -1.00   |        |
| People's Republic | — | — | — | — | (73.72,  | (73.29,  | (-0.05, | 0.001  | (22.65,  | (18.09,  | (-0.84, | <0.001 | (0.18, | (0.13, | (-1.10, | <0.001 |
| of Korea          |   |   |   |   | 79.01)   | 78.26)   | -0.01)  |        | 25.66)   | 20.61)   | -0.70)  |        | 0.57)  | 0.45)  | -0.90)  |        |
| Democratic        |   |   |   |   | 596.44   | 629.37   | 0.21    |        | 84.55    | 75.32    | -0.42   |        | 0.90   | 0.71   | -0.90   |        |
| Republic of the   | — | — | — | — | (590.78, | (625.61, | (0.13,  | <0.001 | (82.38,  | (74.00,  | (-0.57, | <0.001 | (0.68, | (0.58, | (-1.12, | <0.001 |
| Congo             |   |   |   |   | 602.14)  | 633.15)  | 0.30)   |        | 86.78)   | 76.67)   | -0.26)  |        | 1.16)  | 0.86)  | -0.67)  |        |
|                   |   |   |   |   | 583.92   | 537.75   | -0.28   |        | 63.16    | 45.53    | -1.06   |        | 0.54   | 0.28   | -2.12   |        |
| Denmark           | — | — | — | — | (568.48, | (522.56, | (-0.30, | <0.001 | (58.17,  | (41.19,  | (-1.52, | <0.001 | (0.18, | (0.05, | (-3.18, | <0.001 |
|                   |   |   |   |   | 599.68)  | 553.29)  | -0.27)  |        | 68.48)   | 50.22)   | -0.60)  |        | 1.28)  | 0.95)  | -1.05)  |        |
|                   |   |   |   |   | 556.36   | 660.79   | 0.60    |        | 91.91    | 79.34    | -0.45   |        | 1.05   | 0.73   | -1.35   |        |
| Djibouti          | — | — | — | — | (507.68, | (628.53, | (0.58,  | <0.001 | (72.43,  | (68.50,  | (-0.77, | 0.006  | (0.01, | (0.08, | (-1.54, | <0.001 |
|                   |   |   |   |   | 608.85)  | 694.35)  | 0.62)   |        | 115.41)  | 91.49)   | -0.13)  |        | 7.42)  | 3.00)  | -1.16)  |        |
|                   |   |   |   |   | 388.72   | 398.18   | 0.08    |        | 170.69   | 145.26   | -0.57   |        | 2.55   | 2.10   | -0.69   |        |
| Dominica          | — | — | — | — | (290.16, | (295.64, | (0.06,  | <0.001 | (106.66, | (86.47,  | (-1.25, | 0.110  | (0.00, | (0.00, | (-1.43, | 0.068  |
|                   |   |   |   |   | 512.57)  | 525.03)  | 0.09)   |        | 261.42)  | 229.08)  | 0.13)   |        | 39.49) | 34.19) | 0.05)   |        |
|                   |   |   |   |   | 308.49   | 338.73   | 0.32    |        | 82.83    | 85.09    | 0.11    |        | 1.11   | 1.13   | 0.09    |        |
| Dominican         | — | — | — | — | (299.85, | (331.14, | (0.31,  | <0.001 | (78.30,  | (81.29,  | (-0.27, | 0.577  | (0.63, | (0.73, | (-0.41, | 0.732  |
| Republic          |   |   |   |   | 317.34)  | 346.47)  | 0.34)   |        | 87.58)   | 89.03)   | 0.49)   |        | 1.82)  | 1.68)  | 0.59)   |        |
|                   |   |   |   |   | 264.62   | 286.29   | 0.27    |        | 78.97    | 44.55    | -1.99   |        | 1.08   | 0.48   | -2.80   |        |
| Ecuador           | — | — | — | — | (257.70, | (280.81, | (0.23,  | <0.001 | (75.13,  | (42.39,  | (-2.53, | <0.001 | (0.67, | (0.28, | (-3.68, | <0.001 |
|                   |   |   |   |   | 271.69)  | 291.86)  | 0.31)   |        | 82.96)   | 46.79)   | -1.45)  |        | 1.66)  | 0.78)  | -1.91)  |        |
|                   |   |   |   |   | 856.81   | 995.43   | 0.52    |        | 160.45   | 139.51   | -0.35   |        | 1.87   | 1.42   | -0.78   |        |
| Egypt             | — | — | — | — | (851.28, | (991.07, | (0.50,  | <0.001 | (158.05, | (137.88, | (-0.48, | <0.001 | (1.62, | (1.26, | (-1.48, | 0.030  |
|                   |   |   |   |   | 862.37)  | 999.81)  | 0.53)   |        | 162.89)  | 141.16)  | -0.22)  |        | 2.16)  | 1.60)  | -0.08)  |        |
|                   |   |   |   |   | 361.66   | 452.55   | 0.78    |        | 73.50    | 50.21    | -1.24   |        | 0.90   | 0.43   | -2.43   |        |
| El Salvador       | — | — | — | — | (350.50, | (441.27, | (0.76,  | <0.001 | (68.35,  | (46.49,  | (-1.72, | <0.001 | (0.41, | (0.15, | (-3.17, | <0.001 |
|                   |   |   |   |   | 373.13)  | 464.06)  | 0.81)   |        | 78.97)   | 54.16)   | -0.76)  |        | 1.77)  | 0.97)  | -1.69)  |        |

|                   |   |   |   |   |          |          |         |        |          |          |         |        |        |        |         |        |
|-------------------|---|---|---|---|----------|----------|---------|--------|----------|----------|---------|--------|--------|--------|---------|--------|
|                   |   |   |   |   | 524.52   | 674.12   | 0.88    |        | 82.97    | 67.70    | -0.67   |        | 0.94   | 0.54   | -1.87   |        |
| Equatorial Guinea | — | — | — | — | (476.21, | (644.15, | (0.84,  | <0.001 | (64.06,  | (58.26,  | (-0.86, | <0.001 | (0.01, | (0.03, | (-2.16, | <0.001 |
|                   |   |   |   |   | 576.68)  | 705.23)  | 0.92)   |        | 105.98)  | 78.34)   | -0.47)  |        | 7.14)  | 2.62)  | -1.57)  |        |
|                   |   |   |   |   | 522.30   | 623.09   | 0.60    |        | 111.92   | 95.11    | -0.59   |        | 1.44   | 1.05   | -1.14   |        |
| Eritrea           | — | — | — | — | (503.53, | (609.95, | (0.56,  | <0.001 | (103.09, | (89.93,  | (-0.69, | <0.001 | (0.60, | (0.56, | (-1.28, | <0.001 |
|                   |   |   |   |   | 541.64)  | 636.46)  | 0.64)   |        | 121.34)  | 100.54)  | -0.49)  |        | 2.98)  | 1.80)  | -1.00)  |        |
|                   |   |   |   |   | 288.41   | 299.44   | 0.14    |        | 43.91    | 38.22    | -0.24   |        | 0.47   | 0.37   | -0.49   |        |
| Estonia           | — | — | — | — | (268.43, | (274.28, | (0.10,  | <0.001 | (36.46,  | (29.89,  | (-0.44, | 0.024  | (0.03, | (0.00, | (-0.83, | 0.006  |
|                   |   |   |   |   | 309.53)  | 326.46)  | 0.19)   |        | 52.50)   | 48.42)   | -0.03)  |        | 2.32)  | 3.28)  | -0.15)  |        |
|                   |   |   |   |   | 280.40   | 293.27   | 0.14    |        | 54.78    | 46.92    | -0.59   |        | 0.68   | 0.53   | -0.92   |        |
| Eswatini          | — | — | — | — | (255.23, | (272.82, | (0.11,  | <0.001 | (43.49,  | (38.88,  | (-0.99, | 0.004  | (0.01, | (0.03, | (-1.50, | 0.002  |
|                   |   |   |   |   | 307.69)  | 314.93)  | 0.18)   |        | 68.38)   | 56.22)   | -0.19)  |        | 4.44)  | 2.62)  | -0.33)  |        |
|                   |   |   |   |   | 493.13   | 590.28   | 0.62    |        | 132.78   | 76.04    | -1.90   |        | 1.80   | 0.74   | -3.00   |        |
| Ethiopia          | — | — | — | — | (488.66, | (587.04, | (0.60,  | <0.001 | (130.42, | (74.87,  | (-2.03, | <0.001 | (1.53, | (0.62, | (-3.21, | <0.001 |
|                   |   |   |   |   | 497.62)  | 593.54)  | 0.64)   |        | 135.17)  | 77.22)   | -1.76)  |        | 2.10)  | 0.86)  | -2.80)  |        |
|                   |   |   |   |   | 308.01   | 321.49   | 0.14    |        | 138.30   | 122.18   | -0.42   |        | 2.02   | 1.74   | -0.50   |        |
| Fiji              | — | — | — | — | (281.50, | (295.38, | (0.10,  | <0.001 | (120.53, | (106.35, | (-0.64, | <0.001 | (0.44, | (0.37, | (-0.74, | <0.001 |
|                   |   |   |   |   | 336.49)  | 349.31)  | 0.18)   |        | 158.07)  | 139.72)  | -0.20)  |        | 6.01)  | 5.09)  | -0.25)  |        |
|                   |   |   |   |   | 439.87   | 399.65   | -0.35   |        | 56.33    | 40.85    | -1.11   |        | 0.55   | 0.33   | -1.74   |        |
| Finland           | — | — | — | — | (426.10, | (385.98, | (-0.47, | <0.001 | (51.51,  | (36.59,  | (-1.70, | <0.001 | (0.18, | (0.06, | (-2.56, | <0.001 |
|                   |   |   |   |   | 454.01)  | 413.71)  | -0.23)  |        | 61.51)   | 45.51)   | -0.52)  |        | 1.36)  | 1.08)  | -0.91)  |        |
|                   |   |   |   |   | 530.84   | 506.07   | -0.17   |        | 59.91    | 46.77    | -0.87   |        | 0.54   | 0.33   | -1.70   |        |
| France            | — | — | — | — | (526.54, | (501.66, | (-0.18, | <0.001 | (58.48,  | (45.44,  | (-1.09, | <0.001 | (0.41, | (0.23, | (-2.18, | <0.001 |
|                   |   |   |   |   | 535.16)  | 510.51)  | -0.15)  |        | 61.37)   | 48.13)   | -0.65)  |        | 0.69)  | 0.47)  | -1.21)  |        |
|                   |   |   |   |   | 536.68   | 575.23   | 0.26    |        | 74.72    | 59.78    | -0.80   |        | 0.79   | 0.50   | -1.51   |        |
| Gabon             | — | — | — | — | (503.90, | (551.71, | (0.17,  | <0.001 | (62.38,  | (52.28,  | (-1.03, | <0.001 | (0.04, | (0.05, | (-1.93, | <0.001 |
|                   |   |   |   |   | 571.26)  | 599.54)  | 0.34)   |        | 88.99)   | 68.10)   | -0.56)  |        | 4.09)  | 1.96)  | -1.09)  |        |
|                   |   |   |   |   | 753.85   | 826.30   | 0.31    |        | 101.76   | 91.94    | -0.33   |        | 1.04   | 0.81   | -0.80   |        |
| Gambia            | — | — | — | — | (715.50, | (800.87, | (0.29,  | <0.001 | (87.71,  | (83.45,  | (-0.72, | 0.105  | (0.11, | (0.20, | (-1.54, | 0.035  |
|                   |   |   |   |   | 793.98)  | 852.41)  | 0.33)   |        | 117.69)  | 101.13)  | 0.07)   |        | 4.47)  | 2.27)  | -0.06)  |        |
|                   |   |   |   |   | 246.48   | 256.72   | 0.15    |        | 54.32    | 49.12    | -0.40   |        | 0.68   | 0.59   | -0.53   |        |
| Georgia           | — | — | — | — | (237.07, | (243.19, | (0.11,  | <0.001 | (50.00,  | (43.50,  | (-1.39, | 0.426  | (0.28, | (0.14, | (-1.58, | 0.325  |
|                   |   |   |   |   | 256.17)  | 270.86)  | 0.18)   |        | 58.94)   | 55.33)   | 0.59)   |        | 1.40)  | 1.77)  | 0.53)   |        |

|               |   |   |   |   |          |          |         |        |          |          |         |        |        |        |         |        |
|---------------|---|---|---|---|----------|----------|---------|--------|----------|----------|---------|--------|--------|--------|---------|--------|
|               |   |   |   |   | 718.05   | 627.81   | -0.47   |        | 86.79    | 63.17    | -1.13   |        | 0.82   | 0.50   | -1.77   |        |
| Germany       | — | — | — | — | (713.68, | (623.32, | (-0.52, | <0.001 | (85.28,  | (61.76,  | (-1.43, | <0.001 | (0.68, | (0.39, | (-2.40, | <0.001 |
|               |   |   |   |   | 722.43)  | 632.32)  | -0.42)  |        | 88.32)   | 64.60)   | -0.82)  |        | 0.99)  | 0.65)  | -1.14)  |        |
|               |   |   |   |   | 703.23   | 761.39   | 0.26    |        | 138.51   | 90.45    | -1.43   |        | 1.72   | 0.84   | -2.44   |        |
| Ghana         | — | — | — | — | (693.70, | (754.98, | (0.24,  | <0.001 | (134.19, | (88.24,  | (-1.69, | <0.001 | (1.26, | (0.63, | (-2.66, | <0.001 |
|               |   |   |   |   | 712.87)  | 767.85)  | 0.28)   |        | 142.94)  | 92.71)   | -1.18)  |        | 2.30)  | 1.09)  | -2.21)  |        |
|               |   |   |   |   | 222.73   | 211.17   | -0.18   |        | 29.80    | 27.16    | -0.29   |        | 0.30   | 0.27   | -0.32   |        |
| Greece        | — | — | — | — | (216.04, | (203.63, | (-0.20, | <0.001 | (27.39,  | (24.55,  | (-0.58, | 0.054  | (0.11, | (0.08, | (-0.78, | 0.181  |
|               |   |   |   |   | 229.59)  | 218.93)  | -0.17)  |        | 32.38)   | 29.99)   | 0.01)   |        | 0.68)  | 0.73)  | 0.15)   |        |
|               |   |   |   |   | 427.61   | 422.16   | -0.05   |        | 68.72    | 56.79    | -0.64   |        | 0.79   | 0.59   | -1.06   |        |
| Greenland     | — | — | — | — | (319.29, | (305.34, | (-0.10, | 0.107  | (30.15,  | (20.42,  | (-1.41, | 0.106  | (0.00, | (0.00, | (-2.11, | 0.051  |
|               |   |   |   |   | 566.97)  | 572.06)  | 0.01)   |        | 142.42)  | 129.84)  | 0.14)   |        | 48.09) | 45.92) | 0.01)   |        |
|               |   |   |   |   | 303.05   | 320.71   | 0.19    |        | 126.66   | 90.59    | -1.14   |        | 1.89   | 1.26   | -1.37   |        |
| Grenada       | — | — | — | — | (223.76, | (245.91, | (0.18,  | <0.001 | (76.84,  | (52.83,  | (-1.43, | <0.001 | (0.00, | (0.00, | (-1.73, | <0.001 |
|               |   |   |   |   | 403.13)  | 412.15)  | 0.20)   |        | 198.37)  | 146.00)  | -0.86)  |        | 31.57) | 24.51) | -1.00)  |        |
|               |   |   |   |   | 154.66   | 163.85   | 0.20    |        | 28.52    | 36.29    | 0.92    |        | 0.33   | 0.45   | 1.26    |        |
| Guam          | — | — | — | — | (112.42, | (120.45, | (0.18,  | <0.001 | (12.45,  | (17.64,  | (0.35,  | 0.002  | (0.00, | (0.00, | (0.91,  | <0.001 |
|               |   |   |   |   | 207.89)  | 218.27)  | 0.22)   |        | 56.30)   | 66.67)   | 1.50)   |        | 14.55) | 15.03) | 1.60)   |        |
|               |   |   |   |   | 355.34   | 511.69   | 1.26    |        | 117.24   | 71.48    | -1.75   |        | 1.63   | 0.73   | -2.87   |        |
| Guatemala     | — | — | — | — | (346.04, | (504.75, | (1.22,  | <0.001 | (111.72, | (68.89,  | (-2.39, | <0.001 | (1.03, | (0.49, | (-3.78, | <0.001 |
|               |   |   |   |   | 364.85)  | 518.70)  | 1.31)   |        | 122.98)  | 74.15)   | -1.10)  |        | 2.47)  | 1.05)  | -1.94)  |        |
|               |   |   |   |   | 702.86   | 811.17   | 0.49    |        | 145.82   | 116.83   | -0.78   |        | 1.84   | 1.23   | -1.37   |        |
| Guinea        | — | — | — | — | (687.70, | (800.25, | (0.47,  | <0.001 | (138.85, | (112.65, | (-0.94, | <0.001 | (1.13, | (0.83, | (-1.61, | <0.001 |
|               |   |   |   |   | 718.29)  | 822.21)  | 0.51)   |        | 153.07)  | 121.15)  | -0.61)  |        | 2.85)  | 1.77)  | -1.13)  |        |
|               |   |   |   |   | 354.09   | 409.50   | 0.51    |        | 158.09   | 109.29   | -1.27   |        | 2.37   | 1.48   | -1.62   |        |
| Guinea-Bissau | — | — | — | — | (328.21, | (390.25, | (0.48,  | <0.001 | (140.48, | (99.31,  | (-1.35, | <0.001 | (0.68, | (0.54, | (-1.77, | <0.001 |
|               |   |   |   |   | 381.62)  | 429.51)  | 0.53)   |        | 177.43)  | 120.05)  | -1.19)  |        | 6.10)  | 3.35)  | -1.46)  |        |
|               |   |   |   |   | 149.76   | 202.34   | 1.04    |        | 115.72   | 149.40   | 0.88    |        | 1.82   | 2.36   | 0.89    |        |
| Guyana        | — | — | — | — | (132.73, | (181.20, | (1.02,  | <0.001 | (99.73,  | (130.84, | (-0.18, | 0.103  | (0.36, | (0.59, | (-0.26, | 0.130  |
|               |   |   |   |   | 168.64)  | 225.39)  | 1.06)   |        | 133.72)  | 169.93)  | 1.95)   |        | 5.74)  | 6.45)  | 2.04)   |        |
|               |   |   |   |   | 168.02   | 180.84   | 0.25    |        | 211.19   | 164.48   | -0.83   |        | 3.44   | 2.62   | -0.90   |        |
| Haiti         | — | — | — | — | (160.94, | (175.87, | (0.22,  | <0.001 | (203.10, | (159.73, | (-1.18, | <0.001 | (2.47, | (2.05, | (-1.25, | <0.001 |
|               |   |   |   |   | 175.35)  | 185.92)  | 0.27)   |        | 219.53)  | 169.34)  | -0.48)  |        | 4.67)  | 3.30)  | -0.56)  |        |

|                               |   |   |   |   |          |          |         |        |         |         |         |        |        |        |         |        |
|-------------------------------|---|---|---|---|----------|----------|---------|--------|---------|---------|---------|--------|--------|--------|---------|--------|
|                               |   |   |   |   | 268.30   | 334.94   | 0.77    |        | 102.52  | 61.70   | -1.76   |        | 1.49   | 0.75   | -2.35   |        |
| Honduras                      | — | — | — | — | (257.76, | (327.37, | (0.75,  | <0.001 | (95.69, | (58.39, | (-2.11, | <0.001 | (0.77, | (0.42, | (-2.78, | <0.001 |
|                               |   |   |   |   | 279.21)  | 342.65)  | 0.80)   |        | 109.73) | 65.16)  | -1.40)  |        | 2.66)  | 1.25)  | -1.92)  |        |
|                               |   |   |   |   | 350.83   | 351.36   | 0.02    |        | 82.04   | 36.39   | -2.77   |        | 1.09   | 0.30   | -4.42   |        |
| Hungary                       | — | — | — | — | (342.01, | (341.23, | (-0.01, | 0.168  | (77.96, | (33.25, | (-3.07, | <0.001 | (0.67, | (0.09, | (-4.81, | <0.001 |
|                               |   |   |   |   | 359.83)  | 361.73)  | 0.04)   |        | 86.29)  | 39.76)  | -2.47)  |        | 1.68)  | 0.79)  | -4.04)  |        |
|                               |   |   |   |   | 342.89   | 356.91   | 0.13    |        | 38.03   | 31.39   | -0.68   |        | 0.33   | 0.21   | -1.59   |        |
| Iceland                       | — | — | — | — | (294.17, | (310.09, | (0.12,  | <0.001 | (23.08, | (18.70, | (-0.78, | <0.001 | (0.00, | (0.00, | (-1.86, | <0.001 |
|                               |   |   |   |   | 397.60)  | 409.19)  | 0.15)   |        | 59.31)  | 49.94)  | -0.58)  |        | 8.51)  | 7.94)  | -1.32)  |        |
|                               |   |   |   |   | 197.17   | 183.48   | -0.26   |        | 66.38   | 54.52   | -0.75   |        | 0.93   | 0.75   | -0.82   |        |
| India                         | — | — | — | — | (196.49, | (182.99, | (-0.29, | <0.001 | (65.98, | (54.25, | (-1.22, | 0.002  | (0.88, | (0.72, | (-1.34, | 0.002  |
|                               |   |   |   |   | 197.85)  | 183.97)  | -0.24)  |        | 66.78)  | 54.79)  | -0.28)  |        | 0.98)  | 0.78)  | -0.31)  |        |
|                               |   |   |   |   | 171.70   | 183.43   | 0.23    |        | 62.54   | 41.27   | -1.43   |        | 0.89   | 0.52   | -1.82   |        |
| Indonesia                     | — | — | — | — | (170.42, | (182.27, | (0.21,  | <0.001 | (61.75, | (40.72, | (-1.50, | <0.001 | (0.80, | (0.46, | (-1.92, | <0.001 |
|                               |   |   |   |   | 172.99)  | 184.60)  | 0.24)   |        | 63.34)  | 41.83)  | -1.35)  |        | 1.00)  | 0.59)  | -1.72)  |        |
|                               |   |   |   |   | 466.22   | 494.84   | 0.20    |        | 63.22   | 67.21   | 0.22    |        | 0.63   | 0.67   | 0.16    |        |
| Iran (Islamic<br>Republic of) | — | — | — | — | (462.12, | (491.44, | (0.19,  | <0.001 | (61.71, | (65.96, | (0.03,  | 0.023  | (0.49, | (0.55, | (-0.18, | 0.354  |
|                               |   |   |   |   | 470.35)  | 498.26)  | 0.22)   |        | 64.77)  | 68.47)  | 0.41)   |        | 0.81)  | 0.81)  | 0.50)   |        |
|                               |   |   |   |   | 357.87   | 378.19   | 0.19    |        | 92.36   | 60.75   | -1.47   |        | 1.23   | 0.69   | -2.03   |        |
| Iraq                          | — | — | — | — | (351.14, | (374.13, | (0.16,  | <0.001 | (88.91, | (59.11, | (-1.73, | <0.001 | (0.86, | (0.52, | (-2.44, | <0.001 |
|                               |   |   |   |   | 364.71)  | 382.28)  | 0.21)   |        | 95.91)  | 62.42)  | -1.20)  |        | 1.72)  | 0.90)  | -1.62)  |        |
|                               |   |   |   |   | 462.44   | 449.43   | -0.10   |        | 61.35   | 42.08   | -1.34   |        | 0.63   | 0.31   | -2.48   |        |
| Ireland                       | — | — | — | — | (446.24, | (434.83, | (-0.13, | <0.001 | (55.55, | (37.74, | (-1.90, | <0.001 | (0.18, | (0.06, | (-3.45, | <0.001 |
|                               |   |   |   |   | 479.08)  | 464.42)  | -0.08)  |        | 67.60)  | 46.80)  | -0.78)  |        | 1.59)  | 1.03)  | -1.51)  |        |
|                               |   |   |   |   | 301.27   | 301.47   | 0.00    |        | 37.83   | 29.70   | -0.82   |        | 0.36   | 0.23   | -1.56   |        |
| Israel                        | — | — | — | — | (290.31, | (293.00, | (-0.03, | 0.903  | (34.02, | (27.09, | (-1.13, | <0.001 | (0.08, | (0.06, | (-2.07, | <0.001 |
|                               |   |   |   |   | 312.55)  | 310.13)  | 0.03)   |        | 41.96)  | 32.50)  | -0.51)  |        | 1.00)  | 0.61)  | -1.06)  |        |
|                               |   |   |   |   | 385.69   | 382.51   | -0.03   |        | 39.48   | 34.07   | -0.54   |        | 0.31   | 0.23   | -1.02   |        |
| Italy                         | — | — | — | — | (381.96, | (378.12, | (-0.16, | 0.594  | (38.29, | (32.78, | (-0.72, | <0.001 | (0.22, | (0.14, | (-1.35, | <0.001 |
|                               |   |   |   |   | 389.44)  | 386.94)  | 0.09)   |        | 40.69)  | 35.40)  | -0.37)  |        | 0.44)  | 0.36)  | -0.70)  |        |
|                               |   |   |   |   | 301.19   | 340.56   | 0.43    |        | 61.26   | 82.92   | 1.19    |        | 0.77   | 1.11   | 1.43    |        |
| Jamaica                       | — | — | — | — | (285.88, | (325.96, | (0.41,  | <0.001 | (54.33, | (75.81, | (0.21,  | 0.017  | (0.18, | (0.43, | (0.19,  | 0.024  |
|                               |   |   |   |   | 317.17)  | 355.66)  | 0.44)   |        | 68.89)  | 90.55)  | 2.19)   |        | 2.22)  | 2.35)  | 2.69)   |        |

|                                        |   |   |   |   |          |          |         |        |         |         |         |        |        |        |         |        |
|----------------------------------------|---|---|---|---|----------|----------|---------|--------|---------|---------|---------|--------|--------|--------|---------|--------|
|                                        |   |   |   |   | 336.28   | 335.86   | -0.00   |        | 35.03   | 30.23   | -0.52   |        | 0.28   | 0.20   | -1.26   |        |
| Japan                                  | — | — | — | — | (333.84, | (333.02, | (-0.06, | 0.955  | (34.25, | (29.38, | (-0.70, | <0.001 | (0.22, | (0.14, | (-1.43, | <0.001 |
|                                        |   |   |   |   | 338.72)  | 338.73)  | 0.06)   |        | 35.83)  | 31.09)  | -0.34)  |        | 0.36)  | 0.29)  | -1.09)  |        |
|                                        |   |   |   |   | 556.66   | 586.27   | 0.17    |        | 84.37   | 55.65   | -1.39   |        | 0.93   | 0.41   | -2.70   |        |
| Jordan                                 | — | — | — | — | (538.08, | (576.22, | (0.15,  | <0.001 | (77.16, | (52.58, | (-1.78, | <0.001 | (0.32, | (0.19, | (-3.44, | <0.001 |
|                                        |   |   |   |   | 575.78)  | 596.47)  | 0.20)   |        | 92.13)  | 58.86)  | -1.01)  |        | 2.21)  | 0.79)  | -1.96)  |        |
|                                        |   |   |   |   | 186.79   | 199.30   | 0.24    |        | 85.16   | 51.26   | -1.92   |        | 1.25   | 0.69   | -2.20   |        |
| Kazakhstan                             | — | — | — | — | (182.19, | (194.44, | (0.20,  | <0.001 | (82.07, | (48.92, | (-2.68, | <0.001 | (0.90, | (0.45, | (-3.03, | <0.001 |
|                                        |   |   |   |   | 191.48)  | 204.26)  | 0.28)   |        | 88.34)  | 53.70)  | -1.17)  |        | 1.69)  | 1.04)  | -1.35)  |        |
|                                        |   |   |   |   | 811.21   | 867.00   | 0.22    |        | 91.13   | 91.49   | -0.01   |        | 0.80   | 0.76   | -0.23   |        |
| Kenya                                  | — | — | — | — | (802.61, | (861.45, | (0.19,  | <0.001 | (88.21, | (89.67, | (-0.14, | 0.935  | (0.54, | (0.60, | (-0.56, | 0.176  |
|                                        |   |   |   |   | 819.90)  | 872.57)  | 0.26)   |        | 94.14)  | 93.33)  | 0.13)   |        | 1.15)  | 0.95)  | 0.10)   |        |
|                                        |   |   |   |   | 123.96   | 128.03   | 0.11    |        | 131.72  | 119.43  | -0.37   |        | 2.11   | 1.90   | -0.40   |        |
| Kiribati                               | — | — | — | — | (74.87,  | (87.69,  | (0.09,  | <0.001 | (80.32, | (80.39, | (-0.53, | <0.001 | (0.00, | (0.00, | (-0.59, | <0.001 |
|                                        |   |   |   |   | 195.49)  | 181.09)  | 0.13)   |        | 205.79) | 171.30) | -0.21)  |        | 33.31) | 19.70) | -0.22)  |        |
|                                        |   |   |   |   | 547.88   | 584.76   | 0.23    |        | 66.69   | 51.23   | -0.93   |        | 0.61   | 0.32   | -2.29   |        |
| Kuwait                                 | — | — | — | — | (523.93, | (568.00, | (0.20,  | <0.001 | (58.53, | (46.42, | (-1.40, | <0.001 | (0.08, | (0.06, | (-3.13, | <0.001 |
|                                        |   |   |   |   | 572.69)  | 601.95)  | 0.27)   |        | 75.73)  | 56.48)  | -0.45)  |        | 2.20)  | 1.17)  | -1.43)  |        |
|                                        |   |   |   |   | 177.39   | 184.53   | 0.14    |        | 60.90   | 37.94   | -1.62   |        | 0.86   | 0.48   | -1.95   |        |
| Kyrgyzstan                             | — | — | — | — | (168.88, | (177.30, | (0.13,  | <0.001 | (55.86, | (34.69, | (-2.08, | <0.001 | (0.36, | (0.18, | (-2.66, | <0.001 |
|                                        |   |   |   |   | 186.25)  | 191.99)  | 0.15)   |        | 66.30)  | 41.43)  | -1.15)  |        | 1.77)  | 1.04)  | -1.23)  |        |
|                                        |   |   |   |   | 74.98    | 84.61    | 0.42    |        | 36.61   | 37.27   | 0.08    |        | 0.55   | 0.55   | 0.01    |        |
| Lao People's<br>Democratic<br>Republic | — | — | — | — | (69.03,  | (80.10,  | (0.40,  | <0.001 | (32.36, | (34.28, | (-0.11, | 0.398  | (0.15, | (0.24, | (-0.35, | 0.944  |
|                                        |   |   |   |   | 81.35)   | 89.32)   | 0.44)   |        | 41.29)  | 40.47)  | 0.28)   |        | 1.48)  | 1.08)  | 0.38)   |        |
|                                        |   |   |   |   | 53.28    | 55.34    | 0.13    |        | 25.23   | 14.65   | -1.86   |        | 0.37   | 0.20   | -2.58   |        |
| Latvia                                 | — | — | — | — | (46.86,  | (46.47,  | (0.12,  | <0.001 | (20.93, | (10.46, | (-3.41, | 0.021  | (0.04, | (0.00, | (-4.43, | 0.007  |
|                                        |   |   |   |   | 60.37)   | 65.54)   | 0.15)   |        | 30.20)  | 20.14)  | -0.28)  |        | 1.53)  | 2.19)  | -0.70)  |        |
|                                        |   |   |   |   | 558.41   | 597.57   | 0.24    |        | 97.17   | 79.66   | -0.68   |        | 1.14   | 0.80   | -1.25   |        |
| Lebanon                                | — | — | — | — | (539.57, | (582.31, | (0.22,  | <0.001 | (89.34, | (74.19, | (-0.73, | <0.001 | (0.44, | (0.35, | (-1.38, | <0.001 |
|                                        |   |   |   |   | 577.77)  | 613.15)  | 0.25)   |        | 105.52) | 85.46)  | -0.64)  |        | 2.44)  | 1.63)  | -1.11)  |        |
|                                        |   |   |   |   | 261.35   | 275.84   | 0.19    |        | 43.14   | 50.77   | 0.55    |        | 0.50   | 0.62   | 0.70    |        |
| Lesotho                                | — | — | — | — | (244.68, | (260.97, | (0.16,  | <0.001 | (36.29, | (44.42, | (0.12,  | 0.012  | (0.04, | (0.11, | (-0.12, | 0.093  |
|                                        |   |   |   |   | 278.97)  | 291.37)  | 0.21)   |        | 51.00)  | 57.80)  | 0.97)   |        | 2.29)  | 1.94)  | 1.52)   |        |

|                  |   |   |   |   |          |          |         |        |          |          |         |        |        |        |         |        |
|------------------|---|---|---|---|----------|----------|---------|--------|----------|----------|---------|--------|--------|--------|---------|--------|
|                  |   |   |   |   | 586.76   | 687.70   | 0.55    |        | 121.61   | 94.30    | -0.91   |        | 1.52   | 0.97   | -1.60   |        |
| Liberia          | — | — | — | — | (561.98, | (671.61, | (0.53,  | <0.001 | (110.27, | (88.33,  | (-1.05, | <0.001 | (0.51, | (0.45, | (-2.02, | <0.001 |
|                  |   |   |   |   | 612.39)  | 704.09)  | 0.56)   |        | 133.82)  | 100.59)  | -0.77)  |        | 3.55)  | 1.84)  | -1.17)  |        |
|                  |   |   |   |   | 459.30   | 522.74   | 0.45    |        | 87.28    | 87.98    | 0.00    |        | 1.04   | 1.00   | -0.23   |        |
| Libya            | — | — | — | — | (443.70, | (511.00, | (0.42,  | <0.001 | (80.40,  | (83.23,  | (-0.53, | 0.997  | (0.41, | (0.55, | (-1.06, | 0.596  |
|                  |   |   |   |   | 475.38)  | 534.69)  | 0.47)   |        | 94.64)   | 92.94)   | 0.54)   |        | 2.27)  | 1.66)  | 0.61)   |        |
|                  |   |   |   |   | 281.46   | 286.56   | 0.07    |        | 51.54    | 42.70    | -0.60   |        | 0.61   | 0.47   | -0.85   |        |
| Lithuania        | — | — | — | — | (269.09, | (270.21, | (0.03,  | <0.001 | (46.34,  | (36.67,  | (-1.71, | 0.293  | (0.18, | (0.06, | (-2.41, | 0.290  |
|                  |   |   |   |   | 294.27)  | 303.73)  | 0.11)   |        | 57.17)   | 49.55)   | 0.52)   |        | 1.56)  | 1.92)  | 0.73)   |        |
|                  |   |   |   |   | 819.65   | 802.17   | -0.07   |        | 89.66    | 65.72    | -1.11   |        | 0.79   | 0.38   | -2.54   |        |
| Luxembourg       | — | — | — | — | (754.78, | (748.30, | (-0.13, | 0.012  | (69.29,  | (51.06,  | (-1.40, | <0.001 | (0.00, | (0.00, | (-3.03, | <0.001 |
|                  |   |   |   |   | 889.32)  | 859.30)  | -0.02)  |        | 115.03)  | 83.78)   | -0.83)  |        | 8.71)  | 5.56)  | -2.04)  |        |
|                  |   |   |   |   | 961.98   | 1112.88  | 0.50    |        | 288.34   | 215.68   | -1.00   |        | 3.96   | 2.62   | -1.41   |        |
| Madagascar       | — | — | — | — | (949.13, | (1103.99 | (0.47,  | <0.001 | (281.17, | (211.71, | (-1.28, | <0.001 | (3.15, | (2.19, | (-1.76, | <0.001 |
|                  |   |   |   |   | 974.97)  | 1121.82) | 0.53)   |        | 295.66)  | 219.70)  | -0.71)  |        | 4.94)  | 3.11)  | -1.06)  |        |
|                  |   |   |   |   | 508.45   | 587.09   | 0.51    |        | 105.18   | 80.32    | -0.92   |        | 1.31   | 0.81   | -1.63   |        |
| Malawi           | — | — | — | — | (498.09, | (579.44, | (0.43,  | <0.001 | (100.40, | (77.48,  | (-1.07, | <0.001 | (0.82, | (0.55, | (-1.85, | <0.001 |
|                  |   |   |   |   | 519.00)  | 594.82)  | 0.59)   |        | 110.14)  | 83.26)   | -0.77)  |        | 2.01)  | 1.18)  | -1.41)  |        |
|                  |   |   |   |   | 477.29   | 507.91   | 0.22    |        | 74.92    | 63.04    | -0.50   |        | 0.83   | 0.60   | -1.09   |        |
| Malaysia         | — | — | — | — | (470.25, | (502.47, | (0.20,  | <0.001 | (72.13,  | (61.13,  | (-0.64, | <0.001 | (0.56, | (0.43, | (-1.44, | <0.001 |
|                  |   |   |   |   | 484.43)  | 513.40)  | 0.23)   |        | 77.80)   | 64.99)   | -0.37)  |        | 1.19)  | 0.82)  | -0.75)  |        |
|                  |   |   |   |   | 148.58   | 164.05   | 0.34    |        | 80.25    | 64.37    | -0.73   |        | 1.21   | 0.93   | -0.89   |        |
| Maldives         | — | — | — | — | (111.91, | (138.35, | (0.33,  | <0.001 | (53.46,  | (48.78,  | (-1.00, | <0.001 | (0.00, | (0.01, | (-1.18, | <0.001 |
|                  |   |   |   |   | 195.45)  | 193.66)  | 0.36)   |        | 117.78)  | 83.96)   | -0.47)  |        | 17.42) | 7.26)  | -0.60)  |        |
|                  |   |   |   |   | 794.26   | 887.56   | 0.38    |        | 222.41   | 142.45   | -1.50   |        | 3.06   | 1.60   | -2.17   |        |
| Mali             | — | — | — | — | (780.42, | (878.52, | (0.36,  | <0.001 | (214.91, | (138.73, | (-1.65, | <0.001 | (2.23, | (1.22, | (-2.41, | <0.001 |
|                  |   |   |   |   | 808.30)  | 896.68)  | 0.40)   |        | 230.13)  | 146.25)  | -1.35)  |        | 4.12)  | 2.07)  | -1.94)  |        |
|                  |   |   |   |   | 349.27   | 310.05   | -0.42   |        | 43.33    | 34.01    | -0.82   |        | 0.41   | 0.29   | -1.38   |        |
| Malta            | — | — | — | — | (305.91, | (268.82, | (-0.44, | <0.001 | (29.09,  | (21.37,  | (-1.01, | <0.001 | (0.00, | (0.00, | (-1.83, | <0.001 |
|                  |   |   |   |   | 397.36)  | 356.55)  | -0.39)  |        | 62.51)   | 52.37)   | -0.62)  |        | 7.23)  | 8.44)  | -0.92)  |        |
|                  |   |   |   |   | 110.08   | 114.62   | 0.13    |        | 64.23    | 82.68    | 0.87    |        | 0.99   | 1.29   | 0.90    |        |
| Marshall Islands | — | — | — | — | (51.17,  | (61.44,  | (0.10,  | <0.001 | (20.76,  | (38.58,  | (0.78,  | <0.001 | (0.00, | (0.00, | (0.79,  | <0.001 |



|                   |   |   |   |   |          |          |         |        |          |         |         |        |         |        |         |        |
|-------------------|---|---|---|---|----------|----------|---------|--------|----------|---------|---------|--------|---------|--------|---------|--------|
|                   |   |   |   |   | 213.20)  | 195.72)  | 0.16)   |        | 155.31)  | 155.33) | 0.95)   |        | 58.69)  | 36.07) | 1.00)   |        |
|                   |   |   |   |   | 723.91   | 803.30   | 0.36    |        | 130.39   | 83.51   | -1.52   |        | 1.54    | 0.68   | -2.77   |        |
| Mauritania        | — | — | — | — | (697.45, | (784.00, | (0.34,  | <0.001 | (119.07, | (77.29, | (-1.62, | <0.001 | (0.54,  | (0.22, | (-2.90, | <0.001 |
|                   |   |   |   |   | 751.19)  | 822.98)  | 0.37)   |        | 142.55)  | 90.14)  | -1.43)  |        | 3.54)   | 1.61)  | -2.63)  |        |
|                   |   |   |   |   | 336.95   | 347.12   | 0.11    |        | 86.34    | 73.37   | -0.50   |        | 1.16    | 0.91   | -0.77   |        |
| Mauritius         | — | — | — | — | (314.38, | (323.43, | (0.08,  | <0.001 | (75.09,  | (62.74, | (-0.94, | 0.025  | (0.22,  | (0.12, | (-1.36, | 0.011  |
|                   |   |   |   |   | 360.74)  | 372.14)  | 0.13)   |        | 98.83)   | 85.34)  | -0.06)  |        | 3.55)   | 3.29)  | -0.18)  |        |
|                   |   |   |   |   | 360.73   | 402.71   | 0.38    |        | 56.80    | 47.71   | -0.54   |        | 0.63    | 0.44   | -1.04   |        |
| Mexico            | — | — | — | — | (357.97, | (400.26, | (0.34,  | <0.001 | (55.68,  | (46.86, | (-0.99, | 0.022  | (0.51,  | (0.36, | (-1.41, | <0.001 |
|                   |   |   |   |   | 363.51)  | 405.18)  | 0.41)   |        | 57.93)   | 48.56)  | -0.08)  |        | 0.76)   | 0.53)  | -0.67)  |        |
| Micronesia        |   |   |   |   | 113.94   | 120.67   | 0.20    |        | 72.21    | 80.36   | 0.36    |        | 1.12    | 1.24   | 0.33    |        |
| (Federated States | — | — | — | — | (72.10,  | (78.22,  | (0.19,  | <0.001 | (38.54,  | (45.61, | (0.27,  | <0.001 | (0.00,  | (0.00, | (0.24,  | <0.001 |
| of)               |   |   |   |   | 173.70)  | 179.55)  | 0.21)   |        | 125.11)  | 132.40) | 0.46)   |        | 26.53)  | 24.11) | 0.42)   |        |
|                   |   |   |   |   | 242.21   | 228.69   | -0.21   |        | 35.25    | 29.57   | -0.61   |        | 0.38    | 0.29   | -0.95   |        |
| Monaco            | — | — | — | — | (121.03, | (111.69, | (-0.27, | <0.001 | (2.99,   | (1.75,  | (-0.65, | <0.001 | (0.00,  | (0.00, | (-1.14, | <0.001 |
|                   |   |   |   |   | 455.13)  | 420.11)  | -0.14)  |        | 178.17)  | 142.19) | -0.56)  |        | 126.48) | 91.67) | -0.76)  |        |
|                   |   |   |   |   | 97.01    | 105.44   | 0.30    |        | 70.57    | 26.81   | -3.28   |        | 1.12    | 0.35   | -3.96   |        |
| Mongolia          | — | — | — | — | (88.11,  | (97.62,  | (0.20,  | <0.001 | (62.47,  | (23.02, | (-3.72, | <0.001 | (0.32,  | (0.06, | (-4.49, | <0.001 |
|                   |   |   |   |   | 106.71)  | 113.78)  | 0.40)   |        | 79.54)   | 31.10)  | -2.83)  |        | 2.99)   | 1.29)  | -3.42)  |        |
|                   |   |   |   |   | 260.58   | 251.19   | -0.12   |        | 36.48    | 32.66   | -0.25   |        | 0.38    | 0.32   | -0.38   |        |
| Montenegro        | — | — | — | — | (232.55, | (221.01, | (-0.14, | <0.001 | (26.53,  | (22.57, | (-0.99, | 0.508  | (0.00,  | (0.00, | (-1.45, | 0.492  |
|                   |   |   |   |   | 291.07)  | 284.48)  | -0.11)  |        | 48.96)   | 45.93)  | 0.49)   |        | 3.87)   | 4.71)  | 0.70)   |        |
|                   |   |   |   |   | 382.51   | 409.91   | 0.24    |        | 77.15    | 75.08   | -0.07   |        | 0.95    | 0.90   | -0.18   |        |
| Morocco           | — | — | — | — | (377.18, | (405.28, | (0.21,  | <0.001 | (74.73,  | (73.11, | (-0.27, | 0.488  | (0.69,  | (0.69, | (-0.46, | 0.195  |
|                   |   |   |   |   | 387.91)  | 414.59)  | 0.27)   |        | 79.62)   | 77.09)  | 0.13)   |        | 1.27)   | 1.14)  | 0.09)   |        |
|                   |   |   |   |   | 412.24   | 491.87   | 0.61    |        | 72.87    | 75.35   | 0.11    |        | 0.86    | 0.83   | -0.15   |        |
| Mozambique        | — | — | — | — | (404.22, | (486.08, | (0.57,  | <0.001 | (69.47,  | (73.06, | (-0.03, | 0.135  | (0.53,  | (0.60, | (-0.48, | 0.387  |
|                   |   |   |   |   | 420.37)  | 497.73)  | 0.65)   |        | 76.40)   | 77.70)  | 0.25)   |        | 1.34)   | 1.12)  | 0.19)   |        |
|                   |   |   |   |   | 132.67   | 149.16   | 0.41    |        | 76.46    | 41.77   | -2.08   |        | 1.16    | 0.56   | -2.52   |        |
| Myanmar           | — | — | — | — | (130.24, | (146.93, | (0.38,  | <0.001 | (74.59,  | (40.59, | (-2.34, | <0.001 | (0.94,  | (0.43, | (-2.81, | <0.001 |
|                   |   |   |   |   | 135.14)  | 151.43)  | 0.44)   |        | 78.38)   | 42.97)  | -1.83)  |        | 1.42)   | 0.72)  | -2.23)  |        |
|                   |   |   |   |   | 309.84   | 337.82   | 0.29    |        | 52.42    | 39.88   | -0.94   |        | 0.62    | 0.37   | -1.72   |        |
| Namibia           | — | — | — | — | (289.63, | (322.22, | (0.28,  | <0.001 | (43.96,  | (34.59, | (-1.34, | <0.001 | (0.04,  | (0.04, | (-2.33, | <0.001 |

|                          |   |   |   |   |          |           |         |        |          |          |         |        |         |         |         |        |
|--------------------------|---|---|---|---|----------|-----------|---------|--------|----------|----------|---------|--------|---------|---------|---------|--------|
|                          |   |   |   |   | 331.24)  | 354.02)   | 0.31)   |        | 62.16)   | 45.77)   | -0.54)  |        | 2.87)   | 1.46)   | -1.11)  |        |
|                          |   |   |   |   | 132.50   | 138.97    | 0.16    |        | 87.57    | 92.91    | 0.19    |        | 1.36    | 1.43    | 0.16    |        |
| Nauru                    | — | — | — | — | (24.22,  | (30.62,   | (0.15,  | <0.001 | (8.13,   | (11.73,  | (0.06,  | 0.004  | (0.00,  | (0.00,  | (-0.02, | 0.083  |
|                          |   |   |   |   | 424.42)  | 409.52)   | 0.18)   |        | 358.75)  | 343.30)  | 0.32)   |        | 209.85) | 188.64) | 0.34)   |        |
|                          |   |   |   |   | 122.15   | 121.11    | -0.04   |        | 46.12    | 32.70    | -1.19   |        | 0.68    | 0.45    | -1.43   |        |
| Nepal                    | — | — | — | — | (118.59, | (118.55,  | (-0.06, | 0.007  | (43.90,  | (31.36,  | (-1.37, | <0.001 | (0.43,  | (0.30,  | (-1.76, | <0.001 |
|                          |   |   |   |   | 125.79)  | 123.72)   | -0.01)  |        | 48.43)   | 34.09)   | -1.00)  |        | 1.02)   | 0.64)   | -1.10)  |        |
|                          |   |   |   |   | 501.11   | 521.09    | 0.14    |        | 54.96    | 47.46    | -0.52   |        | 0.47    | 0.33    | -1.18   |        |
| Netherlands              | — | — | — | — | (493.08, | (512.34,  | (0.12,  | <0.001 | (52.33,  | (44.85,  | (-0.69, | <0.001 | (0.26,  | (0.15,  | (-1.56, | <0.001 |
|                          |   |   |   |   | 509.24)  | 529.95)   | 0.15)   |        | 57.70)   | 50.18)   | -0.35)  |        | 0.80)   | 0.64)   | -0.79)  |        |
|                          |   |   |   |   | 138.22   | 86.23     | -1.60   |        | 29.75    | 20.81    | -1.20   |        | 0.37    | 0.27    | -0.90   |        |
| New Zealand              | — | — | — | — | (129.62, | (79.59,   | (-1.71, | <0.001 | (25.84,  | (17.62,  | (-1.92, | 0.001  | (0.06,  | (0.03,  | (-2.44, | 0.255  |
|                          |   |   |   |   | 147.24)  | 93.30)    | -1.49)  |        | 34.10)   | 24.43)   | -0.47)  |        | 1.18)   | 1.02)   | 0.66)   |        |
|                          |   |   |   |   | 278.34   | 333.97    | 0.64    |        | 44.99    | 44.01    | -0.29   |        | 0.51    | 0.44    | -0.90   |        |
| Nicaragua                | — | — | — | — | (266.39, | (324.45,  | (0.61,  | <0.001 | (40.17,  | (40.59,  | (-0.72, | 0.186  | (0.12,  | (0.16,  | (-1.58, | 0.011  |
|                          |   |   |   |   | 290.74)  | 343.69)   | 0.66)   |        | 50.28)   | 47.64)   | 0.14)   |        | 1.47)   | 0.96)   | -0.21)  |        |
|                          |   |   |   |   | 771.23   | 909.17    | 0.57    |        | 139.23   | 110.07   | -0.78   |        | 1.66    | 1.03    | -1.62   |        |
| Niger                    | — | — | — | — | (756.85, | (899.74,  | (0.55,  | <0.001 | (132.98, | (106.70, | (-0.93, | <0.001 | (1.03,  | (0.72,  | (-1.87, | <0.001 |
|                          |   |   |   |   | 785.85)  | 918.68)   | 0.59)   |        | 145.73)  | 113.52)  | -0.63)  |        | 2.57)   | 1.45)   | -1.37)  |        |
|                          |   |   |   |   | 924.09   | 1092.28   | 0.58    |        | 139.94   | 98.87    | -1.21   |        | 1.54    | 0.68    | -2.79   |        |
| Nigeria                  | — | — | — | — | (919.48, | (1089.17, | (0.53,  | <0.001 | (138.09, | (97.92,  | (-1.31, | <0.001 | (1.34,  | (0.60,  | (-3.05, | <0.001 |
|                          |   |   |   |   | 928.71)  | 1095.39)  | 0.62)   |        | 141.81)  | 99.83)   | -1.12)  |        | 1.75)   | 0.77)   | -2.52)  |        |
|                          |   |   |   |   | 188.83   | 200.40    | 0.21    |        | 54.69    | 51.04    | -0.24   |        | 0.75    | 0.67    | -0.41   |        |
| Niue                     | — | — | — | — | (1.46,   | (0.36,    | (0.19,  | <0.001 | (0.00,   | (0.00,   | (-0.43, | 0.013  | (0.00,  | (0.00,  | (-0.74, | 0.013  |
|                          |   |   |   |   | 1387.63) | 1836.01)  | 0.22)   |        | 1147.68) | 1561.18) | -0.05)  |        | 1041.28 | 1462.80 | -0.09)  |        |
|                          |   |   |   |   | 145.30   | 147.18    | 0.05    |        | 27.66    | 19.29    | -1.20   |        | 0.33    | 0.19    | -1.87   |        |
| North Macedonia          | — | — | — | — | (133.65, | (134.70,  | (0.03,  | <0.001 | (22.73,  | (15.04,  | (-1.91, | 0.001  | (0.02,  | (0.00,  | (-3.04, | 0.002  |
|                          |   |   |   |   | 157.71)  | 160.59)   | 0.07)   |        | 33.35)   | 24.48)   | -0.47)  |        | 1.56)   | 1.67)   | -0.68)  |        |
|                          |   |   |   |   | 212.29   | 228.45    | 0.25    |        | 62.43    | 45.25    | -1.07   |        | 0.88    | 0.56    | -1.54   |        |
| Northern Mariana Islands | — | — | — | — | (136.32, | (126.80,  | (0.23,  | <0.001 | (25.60,  | (7.45,   | (-1.32, | <0.001 | (0.00,  | (0.00,  | (-1.95, | <0.001 |
|                          |   |   |   |   | 317.16)  | 398.54)   | 0.27)   |        | 129.72)  | 166.84)  | -0.82)  |        | 38.63)  | 99.61)  | -1.14)  |        |

|                  |   |   |   |   |          |          |         |        |         |         |         |        |         |         |         |        |
|------------------|---|---|---|---|----------|----------|---------|--------|---------|---------|---------|--------|---------|---------|---------|--------|
|                  |   |   |   |   | 288.25   | 369.81   | 0.82    |        | 38.89   | 29.28   | -1.01   |        | 0.39    | 0.16    | -2.99   |        |
| Norway           | — | — | — | — | (276.42, | (356.91, | (0.68,  | <0.001 | (34.63, | (25.75, | (-1.25, | <0.001 | (0.08,  | (0.01,  | (-3.65, | <0.001 |
|                  |   |   |   |   | 300.47)  | 383.08)  | 0.96)   |        | 43.53)  | 33.19)  | -0.77)  |        | 1.16)   | 0.78)   | -2.32)  |        |
|                  |   |   |   |   | 528.32   | 633.47   | 0.63    |        | 99.54   | 81.97   | -0.61   |        | 1.18    | 0.78    | -1.38   |        |
| Oman             | — | — | — | — | (501.98, | (615.36, | (0.60,  | <0.001 | (88.19, | (75.59, | (-1.04, | 0.005  | (0.27,  | (0.29,  | (-2.10, | <0.001 |
|                  |   |   |   |   | 555.76)  | 652.01)  | 0.66)   |        | 112.03) | 88.79)  | -0.18)  |        | 3.48)   | 1.79)   | -0.67)  |        |
|                  |   |   |   |   | 151.91   | 155.78   | 0.09    |        | 63.27   | 79.40   | 0.80    |        | 0.94    | 1.20    | 0.87    |        |
| Pakistan         | — | — | — | — | (150.14, | (154.62, | (0.06,  | <0.001 | (62.09, | (78.56, | (0.71,  | <0.001 | (0.80,  | (1.09,  | (0.71,  | <0.001 |
|                  |   |   |   |   | 153.69)  | 156.95)  | 0.11)   |        | 64.46)  | 80.26)  | 0.90)   |        | 1.10)   | 1.31)   | 1.02)   |        |
|                  |   |   |   |   | 307.44   | 320.24   | 0.14    |        | 68.23   | 62.41   | -0.32   |        | 0.87    | 0.75    | -0.50   |        |
| Palau            | — | — | — | — | (149.74, | (136.62, | (0.10,  | <0.001 | (9.91,  | (4.73,  | (-0.40, | <0.001 | (0.00,  | (0.00,  | (-0.63, | <0.001 |
|                  |   |   |   |   | 564.71)  | 645.16)  | 0.17)   |        | 236.56) | 277.48) | -0.24)  |        | 122.54) | 171.64) | -0.37)  |        |
|                  |   |   |   |   | 512.24   | 550.83   | 0.25    |        | 71.48   | 61.78   | -0.49   |        | 0.75    | 0.55    | -1.07   |        |
| Palestine        | — | — | — | — | (488.06, | (536.12, | (0.24,  | <0.001 | (62.56, | (56.91, | (-0.73, | <0.001 | (0.11,  | (0.18,  | (-1.70, | 0.001  |
|                  |   |   |   |   | 537.42)  | 565.87)  | 0.26)   |        | 81.42)  | 66.97)  | -0.26)  |        | 2.71)   | 1.31)   | -0.43)  |        |
|                  |   |   |   |   | 343.19   | 384.66   | 0.39    |        | 61.59   | 58.73   | -0.14   |        | 0.72    | 0.63    | -0.41   |        |
| Panama           | — | — | — | — | (327.16, | (371.10, | (0.38,  | <0.001 | (54.84, | (53.50, | (-0.54, | 0.517  | (0.17,  | (0.20,  | (-1.10, | 0.251  |
|                  |   |   |   |   | 359.86)  | 398.59)  | 0.40)   |        | 68.98)  | 64.34)  | 0.28)   |        | 2.05)   | 1.49)   | 0.29)   |        |
|                  |   |   |   |   | 70.95    | 77.78    | 0.32    |        | 37.86   | 42.15   | 0.33    |        | 0.57    | 0.63    | 0.33    |        |
| Papua New Guinea | — | — | — | — | (65.25,  | (73.97,  | (0.31,  | <0.001 | (33.61, | (39.35, | (0.08,  | 0.010  | (0.16,  | (0.33,  | (0.05,  | 0.021  |
|                  |   |   |   |   | 77.06)   | 81.74)   | 0.33)   |        | 42.53)  | 45.12)  | 0.59)   |        | 1.49)   | 1.10)   | 0.62)   |        |
|                  |   |   |   |   | 284.61   | 335.66   | 0.57    |        | 50.42   | 41.68   | -0.57   |        | 0.58    | 0.40    | -1.15   |        |
| Paraguay         | — | — | — | — | (273.11, | (326.36, | (0.55,  | <0.001 | (45.52, | (38.44, | (-1.30, | 0.134  | (0.17,  | (0.14,  | (-2.04, | 0.012  |
|                  |   |   |   |   | 296.51)  | 345.16)  | 0.59)   |        | 55.74)  | 45.14)  | 0.18)   |        | 1.49)   | 0.89)   | -0.25)  |        |
|                  |   |   |   |   | 441.93   | 537.88   | 0.68    |        | 80.12   | 57.52   | -1.12   |        | 0.93    | 0.47    | -2.32   |        |
| Peru             | — | — | — | — | (435.82, | (532.35, | (0.64,  | <0.001 | (77.49, | (55.73, | (-2.12, | 0.030  | (0.66,  | (0.32,  | (-4.10, | 0.012  |
|                  |   |   |   |   | 448.11)  | 543.46)  | 0.71)   |        | 82.82)  | 59.36)  | -0.11)  |        | 1.28)   | 0.66)   | -0.51)  |        |
|                  |   |   |   |   | 107.35   | 109.27   | 0.06    |        | 13.65   | 33.48   | 3.19    |        | 0.13    | 0.46    | 4.67    |        |
| Philippines      | — | — | — | — | (105.58, | (107.91, | (0.05,  | <0.001 | (13.01, | (32.72, | (2.81,  | <0.001 | (0.07,  | (0.37,  | (4.27,  | <0.001 |
|                  |   |   |   |   | 109.16)  | 110.64)  | 0.07)   |        | 14.32)  | 34.25)  | 3.58)   |        | 0.22)   | 0.56)   | 5.07)   |        |
|                  |   |   |   |   | 617.34   | 612.42   | -0.02   |        | 83.40   | 48.67   | -1.86   |        | 0.87    | 0.26    | -4.14   |        |
| Poland           | — | — | — | — | (611.44, | (605.96, | (-0.06, | 0.410  | (81.30, | (46.89, | (-2.03, | <0.001 | (0.67,  | (0.15,  | (-4.44, | <0.001 |
|                  |   |   |   |   | 623.28)  | 618.94)  | 0.02)   |        | 85.53)  | 50.50)  | -1.70)  |        | 1.11)   | 0.44)   | -3.84)  |        |

|                                     |   |   |   |   |          |          |         |        |          |         |         |        |        |        |         |        |
|-------------------------------------|---|---|---|---|----------|----------|---------|--------|----------|---------|---------|--------|--------|--------|---------|--------|
|                                     |   |   |   |   | 405.32   | 384.11   | -0.24   |        | 54.58    | 38.37   | -1.20   | 0.56   | 0.31   | -2.02  |         |        |
| Portugal                            | — | — | — | — | (396.29, | (374.28, | (-0.32, | <0.001 | (51.30,  | (35.35, | (-1.47, | <0.001 | (0.28, | (0.10, | (-2.99, | <0.001 |
|                                     |   |   |   |   | 414.50)  | 394.14)  | -0.15)  |        | 58.02)   | 41.59)  | -0.94)  |        | 1.01)  | 0.75)  | -1.05)  |        |
|                                     |   |   |   |   | 357.97   | 372.17   | 0.12    |        | 79.96    | 52.27   | -1.57   |        | 1.02   | 0.55   | -2.35   |        |
| Puerto Rico                         | — | — | — | — | (344.37, | (356.48, | (0.06,  | <0.001 | (73.59,  | (46.54, | (-1.85, | <0.001 | (0.42, | (0.12, | (-2.79, | <0.001 |
|                                     |   |   |   |   | 371.96)  | 388.39)  | 0.19)   |        | 86.73)   | 58.52)  | -1.28)  |        | 2.07)  | 1.60)  | -1.90)  |        |
|                                     |   |   |   |   | 491.95   | 497.05   | 0.04    |        | 64.81    | 48.45   | -0.89   |        | 0.65   | 0.36   | -1.80   |        |
| Qatar                               | — | — | — | — | (439.34, | (472.57, | (0.01,  | 0.010  | (46.73,  | (41.02, | (-1.69, | 0.033  | (0.00, | (0.02, | (-4.04, | 0.122  |
|                                     |   |   |   |   | 549.54)  | 522.67)  | 0.06)   |        | 88.07)   | 57.07)  | -0.07)  |        | 8.15)  | 2.43)  | 0.49)   |        |
|                                     |   |   |   |   | 223.11   | 213.07   | -0.18   |        | 44.06    | 18.53   | -2.97   |        | 0.53   | 0.12   | -5.04   |        |
| Republic of Korea                   | — | — | — | — | (220.24, | (209.92, | (-0.27, | <0.001 | (42.78,  | (17.61, | (-3.23, | <0.001 | (0.40, | (0.06, | (-5.88, | <0.001 |
|                                     |   |   |   |   | 226.00)  | 216.26)  | -0.08)  |        | 45.36)   | 19.49)  | -2.70)  |        | 0.70)  | 0.23)  | -4.19)  |        |
|                                     |   |   |   |   | 103.68   | 116.98   | 0.42    |        | 30.75    | 17.70   | -1.86   |        | 0.42   | 0.19   | -2.62   |        |
| Republic of<br>Moldova              | — | — | — | — | (97.00,  | (108.37, | (0.40,  | <0.001 | (27.20,  | (14.56, | (-2.66, | <0.001 | (0.11, | (0.01, | (-3.86, | <0.001 |
|                                     |   |   |   |   | 110.72)  | 126.15)  | 0.43)   |        | 34.65)   | 21.41)  | -1.06)  |        | 1.15)  | 1.14)  | -1.36)  |        |
|                                     |   |   |   |   | 129.43   | 134.23   | 0.13    |        | 34.93    | 19.37   | -1.94   |        | 0.48   | 0.20   | -2.79   |        |
| Romania                             | — | — | — | — | (126.00, | (129.78, | (0.10,  | <0.001 | (33.18,  | (17.75, | (-2.30, | <0.001 | (0.30, | (0.07, | (-3.45, | <0.001 |
|                                     |   |   |   |   | 132.94)  | 138.80)  | 0.17)   |        | 36.75)   | 21.10)  | -1.58)  |        | 0.74)  | 0.47)  | -2.12)  |        |
|                                     |   |   |   |   | 128.16   | 130.18   | 0.06    |        | 34.69    | 46.65   | 1.06    |        | 0.46   | 0.68   | 1.40    |        |
| Russian Federation                  | — | — | — | — | (126.79, | (128.58, | (0.03,  | <0.001 | (34.01,  | (45.79, | (-0.03, | 0.056  | (0.39, | (0.58, | (0.11,  | 0.034  |
|                                     |   |   |   |   | 129.54)  | 131.79)  | 0.09)   |        | 35.38)   | 47.53)  | 2.17)   |        | 0.55)  | 0.79)  | 2.70)   |        |
|                                     |   |   |   |   | 554.74   | 645.82   | 0.54    |        | 184.93   | 97.39   | -2.20   |        | 2.63   | 1.05   | -3.15   |        |
| Rwanda                              | — | — | — | — | (542.23, | (636.25, | (0.50,  | <0.001 | (177.60, | (93.67, | (-2.51, | <0.001 | (1.81, | (0.69, | (-3.54, | <0.001 |
|                                     |   |   |   |   | 567.49)  | 655.50)  | 0.58)   |        | 192.51)  | 101.22) | -1.89)  |        | 3.71)  | 1.53)  | -2.76)  |        |
|                                     |   |   |   |   | 266.06   | 281.68   | 0.20    |        | 141.85   | 43.85   | -3.96   |        | 2.21   | 0.48   | -5.14   |        |
| Saint Kitts and<br>Nevis            | — | — | — | — | (168.45, | (192.66, | (0.18,  | <0.001 | (72.81,  | (14.22, | (-4.17, | <0.001 | (0.00, | (0.00, | (-5.44, | <0.001 |
|                                     |   |   |   |   | 402.69)  | 399.12)  | 0.21)   |        | 251.72)  | 104.52) | -3.75)  |        | 54.71) | 37.26) | -4.84)  |        |
|                                     |   |   |   |   | 443.25   | 459.95   | 0.13    |        | 128.69   | 91.07   | -1.19   |        | 1.81   | 1.14   | -1.60   |        |
| Saint Lucia                         | — | — | — | — | (367.94, | (390.20, | (0.11,  | <0.001 | (88.53,  | (61.92, | (-1.65, | <0.001 | (0.00, | (0.00, | (-2.23, | <0.001 |
|                                     |   |   |   |   | 530.98)  | 538.97)  | 0.14)   |        | 182.24)  | 129.74) | -0.72)  |        | 21.34) | 14.33) | -0.97)  |        |
|                                     |   |   |   |   | 533.50   | 561.73   | 0.18    |        | 166.68   | 144.90  | -0.56   |        | 2.33   | 1.95   | -0.70   |        |
| Saint Vincent and<br>the Grenadines | — | — | — | — | (441.10, | (464.05, | (0.17,  | <0.001 | (115.66, | (97.82, | (-1.10, | 0.047  | (0.00, | (0.00, | (-1.35, | 0.037  |
|                                     |   |   |   |   | 641.86)  | 674.03)  | 0.18)   |        | 234.81)  | 206.97) | -0.01)  |        | 27.81) | 22.13) | -0.04)  |        |

|                          |   |   |   |   |          |          |         |        |          |          |         |        |        |        |         |        |
|--------------------------|---|---|---|---|----------|----------|---------|--------|----------|----------|---------|--------|--------|--------|---------|--------|
|                          |   |   |   |   | 151.46   | 157.92   | 0.13    |        | 51.53    | 61.27    | 0.59    |        | 0.73   | 0.89   | 0.67    |        |
| Samoa                    | — | — | — | — | (111.48, | (121.90, | (0.10,  | <0.001 | (28.40,  | (38.95,  | (0.54,  | <0.001 | (0.00, | (0.00, | (0.59,  | <0.001 |
|                          |   |   |   |   | 203.11)  | 202.18)  | 0.16)   |        | 87.67)   | 92.49)   | 0.65)   |        | 18.41) | 13.21) | 0.75)   |        |
|                          |   |   |   |   | 1093.61  | 1044.57  | -0.17   |        | 101.58   | 97.52    | -0.15   |        | 0.74   | 0.71   | -0.12   |        |
| San Marino               | — | — | — | — | (808.88, | (789.06, | (-0.19, | <0.001 | (30.46,  | (32.87,  | (-0.23, | <0.001 | (0.00, | (0.00, | (-0.29, | 0.148  |
|                          |   |   |   |   | 1449.96) | 1360.03) | -0.15)  |        | 252.99)  | 228.69)  | -0.08)  |        | 94.73) | 80.27) | 0.04)   |        |
|                          |   |   |   |   | 1497.96  | 1749.98  |         |        | 224.14   | 251.54   | 0.57    |        | 2.47   | 2.67   | 0.47    |        |
| Sao Tome and<br>Principe | — | — | — | — | (1338.23 | (1627.67 | 0.54    | <0.001 | (162.52, | (205.76, | (-0.11, | 0.102  | (0.00, | (0.09, | (-0.57, | 0.376  |
|                          |   |   |   |   | ,        | ,        | (0.53,  |        | (162.52, | (205.76, | (-0.11, |        | (0.00, | (0.09, | (-0.57, |        |
|                          |   |   |   |   | 1673.98) | 1879.49) | 0.55)   |        | 303.76)  | 304.87)  | 1.25)   |        | 29.61) | 14.82) | 1.52)   |        |
|                          |   |   |   |   | 406.51   | 428.14   | 0.18    |        | 95.35    | 88.45    | -0.28   |        | 1.26   | 1.13   | -0.40   |        |
| Saudi Arabia             | — | — | — | — | (398.81, | (423.48, | (0.17,  | <0.001 | (91.57,  | (86.37,  | (-0.44, | <0.001 | (0.85, | (0.91, | (-0.69, | 0.009  |
|                          |   |   |   |   | 414.35)  | 432.84)  | 0.19)   |        | 99.26)   | 90.56)   | -0.13)  |        | 1.80)  | 1.39)  | -0.10)  |        |
|                          |   |   |   |   | 655.97   | 709.97   | 0.27    |        | 101.99   | 79.75    | -0.88   |        | 1.13   | 0.70   | -1.73   |        |
| Senegal                  | — | — | — | — | (642.66, | (700.53, | (0.26,  | <0.001 | (96.67,  | (76.58,  | (-1.10, | <0.001 | (0.62, | (0.43, | (-2.14, | <0.001 |
|                          |   |   |   |   | 669.50)  | 719.51)  | 0.28)   |        | 107.55)  | 83.03)   | -0.66)  |        | 1.91)  | 1.09)  | -1.32)  |        |
|                          |   |   |   |   | 301.39   | 295.27   | -0.06   |        | 45.77    | 32.25    | -1.21   |        | 0.51   | 0.28   | -2.15   |        |
| Serbia                   | — | — | — | — | (293.09, | (286.08, | (-0.08, | <0.001 | (42.62,  | (29.32,  | (-1.38, | <0.001 | (0.23, | (0.08, | (-2.49, | <0.001 |
|                          |   |   |   |   | 309.87)  | 304.68)  | -0.03)  |        | 49.10)   | 35.40)   | -1.03)  |        | 0.98)  | 0.75)  | -1.81)  |        |
|                          |   |   |   |   | 335.44   | 328.64   | -0.07   |        | 129.91   | 78.67    | -1.72   |        | 1.90   | 1.02   | -2.17   |        |
| Seychelles               | — | — | — | — | (250.04, | (248.25, | (-0.08, | <0.001 | (77.69,  | (42.68,  | (-2.06, | <0.001 | (0.00, | (0.00, | (-2.74, | <0.001 |
|                          |   |   |   |   | 444.81)  | 427.55)  | -0.06)  |        | 208.05)  | 133.89)  | -1.38)  |        | 38.66) | 25.77) | -1.60)  |        |
|                          |   |   |   |   | 830.30   | 936.03   | 0.42    |        | 119.04   | 120.88   | 0.05    |        | 1.26   | 1.18   | -0.23   |        |
| Sierra Leone             | — | — | — | — | (809.42, | (921.86, | (0.39,  | <0.001 | (111.10, | (115.74, | (-0.09, | 0.480  | (0.56, | (0.72, | (-0.43, | 0.033  |
|                          |   |   |   |   | 851.61)  | 950.39)  | 0.45)   |        | 127.42)  | 126.20)  | 0.19)   |        | 2.48)  | 1.86)  | -0.02)  |        |
|                          |   |   |   |   | 201.40   | 186.63   | -0.28   |        | 36.96    | 20.45    | -2.22   |        | 0.45   | 0.17   | -3.39   |        |
| Singapore                | — | — | — | — | (191.45, | (178.43, | (-0.32, | <0.001 | (32.76,  | (17.74,  | (-3.15, | <0.001 | (0.11, | (0.02, | (-5.03, | <0.001 |
|                          |   |   |   |   | 211.78)  | 195.21)  | -0.24)  |        | 41.61)   | 23.57)   | -1.27)  |        | 1.33)  | 0.93)  | -1.72)  |        |
|                          |   |   |   |   | 717.26   | 708.47   | -0.04   |        | 96.60    | 65.50    | -1.26   |        | 0.99   | 0.46   | -2.48   |        |
| Slovakia                 | — | — | — | — | (700.63, | (690.15, | (-0.07, | 0.007  | (90.65,  | (60.13,  | (-1.64, | <0.001 | (0.48, | (0.13, | (-3.26, | <0.001 |
|                          |   |   |   |   | 734.19)  | 727.20)  | -0.01)  |        | 102.86)  | 71.28)   | -0.89)  |        | 1.84)  | 1.29)  | -1.71)  |        |
|                          |   |   |   |   | 518.79   | 481.17   | -0.25   |        | 52.98    | 36.94    | -1.20   |        | 0.43   | 0.18   | -3.15   |        |
| Slovenia                 | — | — | — | — | (495.70, | (454.59, | (-0.28, | <0.001 | (45.89,  | (29.95,  | (-1.37, | <0.001 | (0.04, | (0.00, | (-4.10, | <0.001 |

|                      |   |   |   |   |          |          |         |        |          |         |         |        |        |        |         |        |
|----------------------|---|---|---|---|----------|----------|---------|--------|----------|---------|---------|--------|--------|--------|---------|--------|
|                      |   |   |   |   | 542.72)  | 509.01)  | -0.23)  |        | 60.91)   | 45.20)  | -1.02)  |        | 1.87)  | 2.10)  | -2.19)  |        |
|                      |   |   |   |   | 67.11    | 71.64    | 0.22    |        | 82.02    | 88.49   | 0.26    |        | 1.34   | 1.44   | 0.24    |        |
| Solomon Islands      | — | — | — | — | (48.48,  | (57.99,  | (0.21,  | <0.001 | (59.63,  | (72.78, | (0.11,  | 0.001  | (0.01, | (0.14, | (0.11,  | <0.001 |
|                      |   |   |   |   | 91.69)   | 87.69)   | 0.23)   |        | 110.78)  | 106.66) | 0.41)   |        | 11.12) | 5.70)  | 0.38)   |        |
|                      |   |   |   |   | 497.80   | 554.76   | 0.39    |        | 127.78   | 95.22   | -0.99   |        | 1.72   | 1.11   | -1.48   |        |
| Somalia              | — | — | — | — | (485.40, | (547.10, | (0.34,  | <0.001 | (121.42, | (92.00, | (-1.15, | <0.001 | (1.05, | (0.78, | (-1.69, | <0.001 |
|                      |   |   |   |   | 510.44)  | 562.50)  | 0.45)   |        | 134.39)  | 98.54)  | -0.82)  |        | 2.66)  | 1.54)  | -1.27)  |        |
|                      |   |   |   |   | 285.39   | 303.04   | 0.20    |        | 70.24    | 42.23   | -1.63   |        | 0.94   | 0.45   | -2.42   |        |
| South Africa         | — | — | — | — | (281.73, | (299.88, | (0.18,  | <0.001 | (68.38,  | (41.08, | (-2.93, | 0.016  | (0.73, | (0.34, | (-4.20, | 0.010  |
|                      |   |   |   |   | 289.08)  | 306.24)  | 0.23)   |        | 72.15)   | 43.41)  | -0.30)  |        | 1.19)  | 0.58)  | -0.60)  |        |
|                      |   |   |   |   | 633.02   | 697.93   | 0.34    |        | 102.54   | 79.70   | -0.86   |        | 1.16   | 0.72   | -1.71   |        |
| South Sudan          | — | — | — | — | (617.69, | (685.42, | (0.33,  | <0.001 | (96.31,  | (75.46, | (-1.15, | <0.001 | (0.58, | (0.36, | (-2.18, | <0.001 |
|                      |   |   |   |   | 648.68)  | 710.63)  | 0.35)   |        | 109.12)  | 84.13)  | -0.56)  |        | 2.15)  | 1.28)  | -1.23)  |        |
|                      |   |   |   |   | 339.86   | 332.07   | -0.09   |        | 44.85    | 34.94   | -0.91   |        | 0.45   | 0.29   | -1.55   |        |
| Spain                | — | — | — | — | (335.66, | (327.53, | (-0.14, | <0.001 | (43.33,  | (33.49, | (-1.06, | <0.001 | (0.31, | (0.17, | (-1.91, | <0.001 |
|                      |   |   |   |   | 344.11)  | 336.66)  | -0.05)  |        | 46.41)   | 36.44)  | -0.76)  |        | 0.63)  | 0.46)  | -1.20)  |        |
|                      |   |   |   |   | 182.45   | 190.16   | 0.14    |        | 86.16    | 45.01   | -2.17   |        | 1.28   | 0.58   | -2.64   |        |
| Sri Lanka            | — | — | — | — | (178.10, | (185.96, | (0.10,  | <0.001 | (83.17,  | (42.98, | (-3.06, | <0.001 | (0.94, | (0.37, | (-3.87, | <0.001 |
|                      |   |   |   |   | 186.87)  | 194.44)  | 0.19)   |        | 89.23)   | 47.11)  | -1.27)  |        | 1.71)  | 0.86)  | -1.40)  |        |
|                      |   |   |   |   | 305.97   | 334.78   | 0.31    |        | 97.22    | 81.14   | -0.61   |        | 1.35   | 1.06   | -0.84   |        |
| Sudan                | — | — | — | — | (300.45, | (330.95, | (0.29,  | <0.001 | (94.06,  | (79.24, | (-0.72, | <0.001 | (1.00, | (0.85, | (-1.00, | <0.001 |
|                      |   |   |   |   | 311.57)  | 338.65)  | 0.32)   |        | 100.46)  | 83.07)  | -0.51)  |        | 1.80)  | 1.30)  | -0.67)  |        |
|                      |   |   |   |   | 208.55   | 224.97   | 0.26    |        | 75.79    | 82.57   | 0.50    |        | 1.09   | 1.19   | 0.56    |        |
| Suriname             | — | — | — | — | (177.51, | (197.55, | (0.23,  | <0.001 | (57.13,  | (66.36, | (-1.20, | 0.565  | (0.01, | (0.06, | (-1.61, | 0.614  |
|                      |   |   |   |   | 243.95)  | 255.17)  | 0.28)   |        | 99.07)   | 101.59) | 2.24)   |        | 8.25)  | 5.69)  | 2.78)   |        |
|                      |   |   |   |   | 594.55   | 290.45   | -2.20   |        | 57.94    | 28.98   | -2.27   |        | 0.44   | 0.22   | -2.03   |        |
| Sweden               | — | — | — | — | (581.97, | (282.02, | (-2.55, | <0.001 | (54.07,  | (26.36, | (-2.81, | <0.001 | (0.17, | (0.05, | (-2.41, | <0.001 |
|                      |   |   |   |   | 607.35)  | 299.10)  | -1.85)  |        | 62.02)   | 31.81)  | -1.72)  |        | 0.95)  | 0.64)  | -1.64)  |        |
|                      |   |   |   |   | 393.82   | 346.66   | -0.45   |        | 47.77    | 31.59   | -1.40   |        | 0.45   | 0.23   | -2.26   |        |
| Switzerland          | — | — | — | — | (383.19, | (336.90, | (-0.57, | <0.001 | (44.10,  | (28.71, | (-1.73, | <0.001 | (0.17, | (0.05, | (-2.85, | <0.001 |
|                      |   |   |   |   | 404.69)  | 356.67)  | -0.34)  |        | 51.69)   | 34.72)  | -1.06)  |        | 1.05)  | 0.72)  | -1.66)  |        |
| Syrian Arab Republic | — | — | — | — | 518.76   | 569.44   | 0.33    | <0.001 | 189.80   | 96.77   | -2.24   | <0.001 | 2.74   | 1.12   | -2.98   | <0.001 |
|                      |   |   |   |   | (509.11, | (560.41, | (0.30,  |        | (183.88, | (93.03, | (-2.62, |        | (2.07, | (0.75, | (-3.45, |        |

|                            |   |   |   |   |          |          |         |        |          |          |         |        |          |          |         |        |
|----------------------------|---|---|---|---|----------|----------|---------|--------|----------|----------|---------|--------|----------|----------|---------|--------|
|                            |   |   |   |   | 528.57)  | 578.60)  | 0.35)   |        | 195.87)  | 100.63)  | -1.86)  |        | 3.60)    | 1.63)    | -2.51)  |        |
|                            |   |   |   |   | 263.77   | 238.98   | -0.34   |        | 31.50    | 25.50    | -0.71   |        | 0.28     | 0.21     | -1.02   |        |
| Taiwan (Province of China) | — | — | — | — | (259.06, | (234.11, | (-0.36, | <0.001 | (29.88,  | (23.93,  | (-0.85, | <0.001 | (0.15,   | (0.09,   | (-1.86, | 0.018  |
|                            |   |   |   |   | 268.56)  | 243.94)  | -0.32)  |        | 33.18)   | 27.15)   | -0.57)  |        | 0.49)    | 0.43)    | -0.18)  |        |
|                            |   |   |   |   | 35.80    | 37.26    | 0.14    |        | 26.48    | 24.84    | -0.24   |        | 0.40     | 0.38     | -0.14   |        |
| Tajikistan                 | — | — | — | — | (32.28,  | (34.66,  | (0.13,  | <0.001 | (23.41,  | (22.70,  | (-0.73, | 0.321  | (0.11,   | (0.16,   | (-0.84, | 0.697  |
|                            |   |   |   |   | 39.64)   | 40.02)   | 0.15)   |        | 29.89)   | 27.14)   | 0.24)   |        | 1.11)    | 0.78)    | 0.56)   |        |
|                            |   |   |   |   | 284.78   | 292.16   | 0.09    |        | 40.25    | 34.49    | -0.54   |        | 0.42     | 0.31     | -1.01   |        |
| Thailand                   | — | — | — | — | (281.87, | (289.12, | (0.07,  | <0.001 | (39.15,  | (33.46,  | (-1.35, | 0.199  | (0.32,   | (0.22,   | (-2.20, | 0.097  |
|                            |   |   |   |   | 287.70)  | 295.23)  | 0.11)   |        | 41.36)   | 35.55)   | 0.28)   |        | 0.55)    | 0.43)    | 0.19)   |        |
|                            |   |   |   |   | 93.82    | 105.50   | 0.41    |        | 24.97    | 30.69    | 0.85    |        | 0.34     | 0.42     | 0.91    |        |
| Timor-Leste                | — | — | — | — | (79.10,  | (93.24,  | (0.40,  | <0.001 | (17.56,  | (24.11,  | (0.26,  | 0.005  | (0.00,   | (0.01,   | (0.14,  | 0.020  |
|                            |   |   |   |   | 110.70)  | 119.11)  | 0.43)   |        | 34.66)   | 38.72)   | 1.45)   |        | 3.64)    | 2.78)    | 1.69)   |        |
|                            |   |   |   |   | 805.78   | 878.60   | 0.30    |        | 139.49   | 106.86   | -0.92   |        | 1.62     | 1.00     | -1.68   |        |
| Togo                       | — | — | — | — | (785.09, | (864.41, | (0.28,  | <0.001 | (130.75, | (101.93, | (-1.05, | <0.001 | (0.80,   | (0.58,   | (-2.03, | <0.001 |
|                            |   |   |   |   | 826.92)  | 892.97)  | 0.33)   |        | 148.72)  | 111.98)  | -0.78)  |        | 3.00)    | 1.63)    | -1.32)  |        |
|                            |   |   |   |   | 142.88   | 156.25   | 0.31    |        | 70.74    | 69.20    | -0.08   |        | 1.07     | 1.02     | -0.17   |        |
| Tokelau                    | — | — | — | — | (0.04,   | (0.01,   | (0.30,  | <0.001 | (0.00,   | (0.00,   | (-0.11, | <0.001 | (0.00,   | (0.00,   | (-0.23, | <0.001 |
|                            |   |   |   |   | 1941.31) | 2570.07) | 0.32)   |        | 1827.50) | 2426.54) | -0.04)  |        | 1705.99) | 2309.87) | -0.10)  |        |
|                            |   |   |   |   | 312.57   | 326.29   | 0.15    |        | 45.71    | 44.28    | -0.09   |        | 0.49     | 0.45     | -0.28   |        |
| Tonga                      | — | — | — | — | (236.10, | (251.30, | (0.13,  | <0.001 | (19.11,  | (19.65,  | (-0.19, | 0.052  | (0.00,   | (0.00,   | (-0.43, | <0.001 |
|                            |   |   |   |   | 408.80)  | 417.44)  | 0.16)   |        | 95.07)   | 86.61)   | 0.00)   |        | 29.50)   | 22.05)   | -0.12)  |        |
|                            |   |   |   |   | 375.44   | 410.01   | 0.30    |        | 78.28    | 117.34   | 1.33    |        | 1.00     | 1.64     | 1.61    |        |
| Trinidad and Tobago        | — | — | — | — | (351.71, | (385.37, | (0.28,  | <0.001 | (67.57,  | (104.58, | (0.92,  | <0.001 | (0.16,   | (0.48,   | (1.09,  | <0.001 |
|                            |   |   |   |   | 400.42)  | 435.91)  | 0.32)   |        | 90.26)   | 131.36)  | 1.75)   |        | 3.36)    | 4.29)    | 2.12)   |        |
|                            |   |   |   |   | 502.97   | 562.25   | 0.38    |        | 71.77    | 71.35    | -0.03   |        | 0.76     | 0.70     | -0.26   |        |
| Tunisia                    | — | — | — | — | (492.18, | (552.42, | (0.36,  | <0.001 | (67.69,  | (67.91,  | (-0.13, | 0.522  | (0.39,   | (0.40,   | (-0.43, | 0.003  |
|                            |   |   |   |   | 513.96)  | 572.22)  | 0.40)   |        | 76.06)   | 74.92)   | 0.07)   |        | 1.35)    | 1.15)    | -0.09)  |        |
|                            |   |   |   |   | 664.33   | 619.28   | -0.24   |        | 88.90    | 65.53    | -1.01   |        | 0.90     | 0.54     | -1.69   |        |
| Turkey                     | — | — | — | — | (659.63, | (615.50, | (-0.26, | <0.001 | (87.18,  | (64.30,  | (-1.30, | <0.001 | (0.73,   | (0.43,   | (-2.17, | <0.001 |
|                            |   |   |   |   | 669.06)  | 623.08)  | -0.22)  |        | 90.64)   | 66.77)   | -0.72)  |        | 1.09)    | 0.66)    | -1.21)  |        |
| Turkmenistan               | — | — | — | — | 108.07   | 115.16   | 0.23    | 0.009  | 101.90   | 105.60   | 0.00    | 0.999  | 1.60     | 1.61     | -0.10   | 0.804  |

|                              |   |   |   |   |          |          |         |        |         |         |         |        |         |         |         |        |
|------------------------------|---|---|---|---|----------|----------|---------|--------|---------|---------|---------|--------|---------|---------|---------|--------|
|                              |   |   |   |   | (100.96, | (108.39, | (0.06,  |        | (94.80, | (99.15, | (-0.76, |        | (0.82,  | (0.91,  | (-0.89, |        |
|                              |   |   |   |   | 115.59)  | 122.27)  | 0.40)   |        | 109.43) | 112.38) | 0.77)   |        | 2.86)   | 2.66)   | 0.70)   |        |
|                              |   |   |   |   | 119.11   | 127.78   | 0.24    |        | 78.56   | 67.92   | -0.50   |        | 1.22    | 1.02    | -0.60   |        |
| Tuvalu                       | — | — | — | — | (17.14,  | (25.21,  | (0.22,  | <0.001 | (5.69,  | (4.67,  | (-0.56, | <0.001 | (0.00,  | (0.00,  | (-0.69, | <0.001 |
|                              |   |   |   |   | 408.88)  | 400.97)  | 0.26)   |        | 343.20) | 312.50) | -0.44)  |        | 206.14) | 197.73) | -0.52)  |        |
|                              |   |   |   |   | 624.02   | 683.79   | 0.33    |        | 83.55   | 90.55   | 0.26    |        | 0.85    | 0.90    | 0.17    |        |
| Uganda                       | — | — | — | — | (615.25, | (678.05, | (0.29,  | <0.001 | (80.28, | (88.43, | (-0.03, | 0.080  | (0.54,  | (0.70,  | (-0.29, | 0.472  |
|                              |   |   |   |   | 632.90)  | 689.57)  | 0.36)   |        | 86.93)  | 92.70)  | 0.56)   |        | 1.29)   | 1.15)   | 0.63)   |        |
|                              |   |   |   |   | 101.83   | 103.80   | 0.09    |        | 30.20   | 41.99   | 1.14    |        | 0.41    | 0.62    | 1.41    |        |
| Ukraine                      | — | — | — | — | (99.77,  | (101.26, | (0.04,  | 0.001  | (29.11, | (40.50, | (-0.60, | 0.200  | (0.29,  | (0.46,  | (-0.61, | 0.173  |
|                              |   |   |   |   | 103.92)  | 106.40)  | 0.13)   |        | 31.33)  | 43.52)  | 2.92)   |        | 0.56)   | 0.84)   | 3.46)   |        |
|                              |   |   |   |   | 78.31    | 75.62    | -0.12   |        | 18.68   | 20.46   | 0.26    |        | 0.24    | 0.27    | 0.43    |        |
| United Arab Emirates         | — | — | — | — | (68.51,  | (70.24,  | (-0.14, | <0.001 | (14.04, | (17.70, | (0.00,  | 0.046  | (0.00,  | (0.05,  | (-0.37, | 0.292  |
|                              |   |   |   |   | 89.21)   | 81.37)   | -0.11)  |        | 24.45)  | 23.59)  | 0.51)   |        | 1.93)   | 0.97)   | 1.24)   |        |
|                              |   |   |   |   | 555.47   | 555.94   | 0.00    |        | 66.01   | 68.19   | 0.12    |        | 0.61    | 0.67    | 0.28    |        |
| United Kingdom               | — | — | — | — | (550.98, | (551.49, | (-0.01, | 0.634  | (64.47, | (66.66, | (-0.17, | 0.419  | (0.47,  | (0.53,  | (-0.22, | 0.275  |
|                              |   |   |   |   | 559.99)  | 560.42)  | 0.02)   |        | 67.58)  | 69.75)  | 0.41)   |        | 0.78)   | 0.84)   | 0.77)   |        |
|                              |   |   |   |   | 591.81   | 708.50   | 0.62    |        | 101.89  | 95.40   | -0.19   |        | 1.18    | 0.96    | -0.65   |        |
| United Republic of Tanzania  | — | — | — | — | (585.00, | (703.61, | (0.60,  | <0.001 | (99.02, | (93.59, | (-0.42, | 0.099  | (0.88,  | (0.78,  | (-0.86, | <0.001 |
|                              |   |   |   |   | 598.68)  | 713.42)  | 0.63)   |        | 104.82) | 97.23)  | 0.04)   |        | 1.55)   | 1.17)   | -0.45)  |        |
|                              |   |   |   |   | 736.16   | 520.97   | -1.17   |        | 79.46   | 77.12   | -0.07   |        | 0.68    | 0.85    | 0.84    |        |
| United States of America     | — | — | — | — | (733.80, | (519.07, | (-1.21, | <0.001 | (78.69, | (76.39, | (-0.41, | 0.664  | (0.61,  | (0.78,  | (0.47,  | <0.001 |
|                              |   |   |   |   | 738.52)  | 522.87)  | -1.13)  |        | 80.23)  | 77.85)  | 0.26)   |        | 0.76)   | 0.93)   | 1.22)   |        |
|                              |   |   |   |   | 362.48   | 374.29   | 0.11    |        | 81.11   | 64.12   | -0.80   |        | 1.05    | 0.75    | -1.14   |        |
| United States Virgin Islands | — | — | — | — | (285.02, | (284.55, | (0.10,  | <0.001 | (47.15, | (31.13, | (-0.93, | <0.001 | (0.00,  | (0.00,  | (-1.32, | <0.001 |
|                              |   |   |   |   | 455.03)  | 484.21)  | 0.11)   |        | 130.79) | 118.36) | -0.67)  |        | 21.45)  | 27.44)  | -0.96)  |        |
|                              |   |   |   |   | 323.78   | 373.04   | 0.49    |        | 55.15   | 44.23   | -0.84   |        | 0.64    | 0.41    | -1.65   |        |
| Uruguay                      | — | — | — | — | (309.20, | (357.82, | (0.47,  | <0.001 | (49.23, | (39.12, | (-1.25, | <0.001 | (0.16,  | (0.07,  | (-2.35, | <0.001 |
|                              |   |   |   |   | 338.87)  | 388.76)  | 0.52)   |        | 61.59)  | 49.84)  | -0.41)  |        | 1.70)   | 1.34)   | -0.93)  |        |
|                              |   |   |   |   | 57.79    | 68.44    | 0.61    |        | 30.60   | 37.33   | 0.72    |        | 0.46    | 0.57    | 0.79    |        |
| Uzbekistan                   | — | — | — | — | (55.54,  | (66.52,  | (0.53,  | <0.001 | (28.93, | (35.92, | (0.28,  | 0.001  | (0.28,  | (0.41,  | (0.21,  | 0.007  |
|                              |   |   |   |   | 60.12)   | 70.40)   | 0.68)   |        | 32.35)  | 38.78)  | 1.16)   |        | 0.73)   | 0.78)   | 1.36)   |        |
| Vanuatu                      | — | — | — | — | 99.79    | 101.09   | 0.04    | 0.006  | 44.88   | 61.34   | 1.05    | <0.001 | 0.66    | 0.94    | 1.17    | <0.001 |



|                |   |   |   |   |          |          |         |        |          |          |         |        |        |        |         |        |
|----------------|---|---|---|---|----------|----------|---------|--------|----------|----------|---------|--------|--------|--------|---------|--------|
|                |   |   |   |   | (67.38,  | (77.46,  | (0.01,  |        | (23.69,  | (42.99,  | (0.79,  |        | (0.00, | (0.00, | (0.84,  |        |
|                |   |   |   |   | 143.80)  | 130.17)  | 0.07)   |        | 78.49)   | 85.33)   | 1.32)   |        | 17.09) | 9.16)  | 1.51)   |        |
| Venezuela      |   |   |   |   | 173.68   | 217.73   | 0.79    |        | 38.24    | 40.55    | 0.13    |        | 0.48   | 0.48   | -0.13   |        |
| (Bolivarian    | — | — | — | — | (169.68, | (213.82, | (0.72,  | <0.001 | (36.34,  | (38.88,  | (-0.69, | 0.749  | (0.29, | (0.31, | (-1.32, | 0.826  |
| Republic of)   |   |   |   |   | 177.75)  | 221.69)  | 0.85)   |        | 40.22)   | 42.28)   | 0.96)   |        | 0.76)  | 0.70)  | 1.07)   |        |
|                |   |   |   |   | 185.86   | 198.82   | 0.23    |        | 34.68    | 32.65    | -0.19   |        | 0.42   | 0.37   | -0.44   |        |
| Viet Nam       | — | — | — | — | (183.66, | (196.83, | (0.21,  | <0.001 | (33.71,  | (31.86,  | (-0.29, | <0.001 | (0.32, | (0.29, | (-0.59, | <0.001 |
|                |   |   |   |   | 188.09)  | 200.83)  | 0.25)   |        | 35.68)   | 33.46)   | -0.09)  |        | 0.55)  | 0.46)  | -0.30)  |        |
|                |   |   |   |   | 297.06   | 320.00   | 0.25    |        | 71.86    | 79.34    | 0.39    |        | 0.97   | 1.06   | 0.36    |        |
| Yemen          | — | — | — | — | (290.05, | (315.65, | (0.24,  | <0.001 | (68.34,  | (77.15,  | (-0.01, | 0.054  | (0.59, | (0.82, | (-0.18, | 0.188  |
|                |   |   |   |   | 304.20)  | 324.40)  | 0.27)   |        | 75.52)   | 81.57)   | 0.78)   |        | 1.50)  | 1.35)  | 0.90)   |        |
|                |   |   |   |   | 502.23   | 590.42   | 0.56    |        | 113.36   | 97.64    | -0.50   |        | 1.46   | 1.11   | -0.95   |        |
| Zambia         | — | — | — | — | (490.75, | (582.71, | (0.53,  | <0.001 | (107.75, | (94.47,  | (-0.61, | <0.001 | (0.87, | (0.79, | (-1.08, | <0.001 |
|                |   |   |   |   | 513.96)  | 598.22)  | 0.59)   |        | 119.21)  | 100.90)  | -0.40)  |        | 2.33)  | 1.52)  | -0.82)  |        |
|                |   |   |   |   | 661.49   | 661.15   | -0.01   |        | 98.51    | 130.99   | 1.03    |        | 1.07   | 1.62   | 1.44    |        |
| Zimbabwe       | — | — | — | — | (650.48, | (652.44, | (-0.03, | 0.655  | (94.08,  | (127.03, | (0.32,  | 0.004  | (0.64, | (1.20, | (-0.21, | 0.087  |
|                |   |   |   |   | 672.67)  | 669.96)  | 0.02)   |        | 103.10)  | 135.05)  | 1.74)   |        | 1.70)  | 2.14)  | 3.10)   |        |
| <b>Men</b>     |   |   |   |   |          |          |         |        |          |          |         |        |        |        |         |        |
|                |   |   |   |   | 279.29   | 316.01   | 0.42    |        | 97.81    | 107.54   | 0.33    |        | 1.42   | 1.55   | 0.39    |        |
| Afghanistan    | — | — | — | — | (271.18, | (312.02, | (0.41,  | <0.001 | (92.52,  | (105.02, | (0.06,  | 0.016  | (0.83, | (1.26, | (0.15,  | 0.001  |
|                |   |   |   |   | 287.64)  | 320.04)  | 0.44)   |        | 103.38)  | 110.11)  | 0.59)   |        | 2.32)  | 1.91)  | 0.62)   |        |
|                |   |   |   |   | 487.39   | 509.95   | 0.16    |        | 87.17    | 108.15   | 0.75    |        | 1.00   | 1.33   | 1.00    |        |
| Albania        | — | — | — | — | (471.54, | (490.33, | (0.13,  | <0.001 | (80.46,  | (99.24,  | (-0.05, | 0.065  | (0.40, | (0.52, | (-0.14, | 0.085  |
|                |   |   |   |   | 503.67)  | 530.18)  | 0.19)   |        | 94.31)   | 117.67)  | 1.56)   |        | 2.11)  | 2.84)  | 2.15)   |        |
|                |   |   |   |   | 341.14   | 366.91   | 0.26    |        | 88.15    | 69.65    | -0.75   |        | 1.16   | 0.83   | -1.06   |        |
| Algeria        | — | — | — | — | (336.07, | (362.82, | (0.23,  | <0.001 | (85.51,  | (67.91,  | (-0.87, | <0.001 | (0.87, | (0.65, | (-1.23, | <0.001 |
|                |   |   |   |   | 346.29)  | 371.04)  | 0.28)   |        | 90.87)   | 71.44)   | -0.64)  |        | 1.53)  | 1.05)  | -0.90)  |        |
|                |   |   |   |   | 170.94   | 178.45   | 0.15    |        | 77.09    | 74.60    | -0.09   |        | 1.15   | 1.10   | -0.04   |        |
| American Samoa | — | — | — | — | (101.28, | (108.64, | (0.14,  | <0.001 | (32.04,  | (30.61,  | (-0.32, | 0.425  | (0.00, | (0.00, | (-0.41, | 0.812  |
|                |   |   |   |   | 274.61)  | 282.49)  | 0.16)   |        | 159.18)  | 156.84)  | 0.14)   |        | 47.53) | 49.74) | 0.32)   |        |
|                |   |   |   |   | 127.18   | 122.80   | -0.13   |        | 25.93    | 20.78    | -0.77   |        | 0.33   | 0.24   | -0.96   |        |
| Andorra        | — | — | — | — | (74.06,  | (69.11,  | (-0.18, | <0.001 | (6.40,   | (3.97,   | (-0.86, | <0.001 | (0.00, | (0.00, | (-1.12, | <0.001 |
|                |   |   |   |   | 208.74)  | 205.15)  | -0.07)  |        | 77.52)   | 69.42)   | -0.68)  |        | 39.67) | 37.92) | -0.80)  |        |

|                     |   |   |   |   |          |          |         |        |          |          |         |        |        |        |         |        |
|---------------------|---|---|---|---|----------|----------|---------|--------|----------|----------|---------|--------|--------|--------|---------|--------|
|                     |   |   |   |   | 345.22   | 400.59   | 0.51    |        | 85.41    | 80.54    | -0.17   |        | 1.13   | 0.99   | -0.40   |        |
| Angola              | — | — | — | — | (337.15, | (395.25, | (0.49,  | <0.001 | (81.30,  | (78.07,  | (-0.72, | 0.542  | (0.69, | (0.73, | (-1.11, | 0.267  |
|                     |   |   |   |   | 353.45)  | 406.00)  | 0.54)   |        | 89.69)   | 83.07)   | 0.38)   |        | 1.74)  | 1.32)  | 0.31)   |        |
| Antigua and Barbuda | — | — | — | — | 474.42   | 485.93   | 0.08    |        | 133.11   | 112.07   | -0.46   |        | 1.83   | 1.45   | -0.57   |        |
|                     |   |   |   |   | (362.42, | (386.65, | (0.08,  | <0.001 | (76.31,  | (67.75,  | (-1.59, | 0.433  | (0.00, | (0.00, | (-2.33, | 0.526  |
|                     |   |   |   |   | 612.28)  | 603.38)  | 0.09)   |        | 217.70)  | 175.15)  | 0.69)   |        | 38.58) | 25.92) | 1.21)   |        |
|                     |   |   |   |   | 171.60   | 249.28   | 1.30    |        | 71.08    | 54.82    | -0.93   |        | 1.06   | 0.70   | -1.44   |        |
| Argentina           | — | — | — | — | (168.34, | (245.96, | (1.25,  | <0.001 | (68.97,  | (53.28,  | (-1.33, | <0.001 | (0.81, | (0.54, | (-1.96, | <0.001 |
|                     |   |   |   |   | 174.91)  | 252.64)  | 1.35)   |        | 73.25)   | 56.40)   | -0.53)  |        | 1.35)  | 0.90)  | -0.92)  |        |
|                     |   |   |   |   | 75.31    | 79.47    | 0.19    |        | 25.91    | 22.99    | -0.57   |        | 0.36   | 0.31   | -0.58   |        |
| Armenia             | — | — | — | — | (69.03,  | (71.79,  | (0.18,  | <0.001 | (22.29,  | (19.14,  | (-1.37, | 0.166  | (0.06, | (0.03, | (-1.26, | 0.093  |
|                     |   |   |   |   | 82.02)   | 87.80)   | 0.20)   |        | 29.96)   | 27.46)   | 0.24)   |        | 1.19)  | 1.40)  | 0.10)   |        |
|                     |   |   |   |   | 127.69   | 121.17   | -0.18   |        | 23.42    | 23.91    | 0.07    |        | 0.28   | 0.30   | 0.29    |        |
| Australia           | — | — | — | — | (123.94, | (117.88, | (-0.19, | <0.001 | (21.83,  | (22.47,  | (-0.23, | 0.638  | (0.13, | (0.16, | (-0.38, | 0.394  |
|                     |   |   |   |   | 131.53)  | 124.53)  | -0.17)  |        | 25.09)   | 25.42)   | 0.37)   |        | 0.52)  | 0.52)  | 0.97)   |        |
|                     |   |   |   |   | 134.30   | 130.01   | -0.13   |        | 34.14    | 18.00    | -2.23   |        | 0.46   | 0.19   | -3.06   |        |
| Austria             | — | — | — | — | (128.58, | (124.14, | (-0.24, | 0.028  | (31.28,  | (15.89,  | (-2.54, | <0.001 | (0.19, | (0.04, | (-3.76, | <0.001 |
|                     |   |   |   |   | 140.22)  | 136.11)  | -0.01)  |        | 37.21)   | 20.34)   | -1.92)  |        | 0.98)  | 0.62)  | -2.36)  |        |
|                     |   |   |   |   | 75.83    | 79.50    | 0.17    |        | 49.58    | 46.81    | -0.31   |        | 0.76   | 0.70   | -0.41   |        |
| Azerbaijan          | — | — | — | — | (71.62,  | (75.62,  | (0.12,  | <0.001 | (46.08,  | (43.96,  | (-1.26, | 0.532  | (0.38, | (0.40, | (-1.45, | 0.440  |
|                     |   |   |   |   | 80.25)   | 83.55)   | 0.22)   |        | 53.30)   | 49.82)   | 0.66)   |        | 1.39)  | 1.18)  | 0.64)   |        |
|                     |   |   |   |   | 200.15   | 207.64   | 0.13    |        | 130.68   | 145.79   | 0.31    |        | 2.05   | 2.33   | 0.41    |        |
| Bahamas             | — | — | — | — | (165.85, | (175.84, | (0.12,  | <0.001 | (102.14, | (119.58, | (-0.31, | 0.333  | (0.07, | (0.22, | (-0.43, | 0.338  |
|                     |   |   |   |   | 240.10)  | 243.61)  | 0.15)   |        | 165.19)  | 176.15)  | 0.93)   |        | 11.67) | 9.39)  | 1.26)   |        |
|                     |   |   |   |   | 210.48   | 229.87   | 0.31    |        | 48.40    | 36.25    | -0.93   |        | 0.61   | 0.39   | -1.39   |        |
| Bahrain             | — | — | — | — | (187.71, | (212.81, | (0.29,  | <0.001 | (37.71,  | (29.69,  | (-1.41, | <0.001 | (0.01, | (0.02, | (-2.22, | 0.001  |
|                     |   |   |   |   | 235.85)  | 248.11)  | 0.32)   |        | 61.84)   | 44.04)   | -0.45)  |        | 5.25)  | 2.43)  | -0.56)  |        |
|                     |   |   |   |   | 152.72   | 163.73   | 0.24    |        | 54.78    | 47.95    | -0.48   |        | 0.78   | 0.65   | -0.69   |        |
| Bangladesh          | — | — | — | — | (151.07, | (162.35, | (0.22,  | <0.001 | (53.77,  | (47.19,  | (-0.90, | 0.027  | (0.66, | (0.56, | (-1.18, | 0.006  |
|                     |   |   |   |   | 154.38)  | 165.13)  | 0.25)   |        | 55.81)   | 48.71)   | -0.06)  |        | 0.92)  | 0.74)  | -0.20)  |        |
|                     |   |   |   |   | 249.06   | 265.43   | 0.22    |        | 90.47    | 70.95    | -0.98   |        | 1.31   | 0.96   | -1.20   |        |
| Barbados            | — | — | — | — | (208.70, | (221.41, | (0.21,  | <0.001 | (66.83,  | (49.44,  | (-1.92, | 0.042  | (0.01, | (0.00, | (-2.27, | 0.029  |
|                     |   |   |   |   | 295.06)  | 315.76)  | 0.23)   |        | 119.88)  | 98.85)   | -0.04)  |        | 9.69)  | 9.83)  | -0.13)  |        |

|                   |   |   |   |   |          |          |        |        |          |          |         |        |        |        |         |        |
|-------------------|---|---|---|---|----------|----------|--------|--------|----------|----------|---------|--------|--------|--------|---------|--------|
|                   |   |   |   |   | 55.71    | 61.02    | 0.32   |        | 46.92    | 54.26    | 0.39    |        | 0.76   | 0.88   | 0.36    |        |
| Belarus           | — | — | — | — | (52.40,  | (56.89,  | (0.30, | <0.001 | (43.99,  | (50.76,  | (-0.38, | 0.325  | (0.43, | (0.50, | (-0.49, | 0.405  |
|                   |   |   |   |   | 59.18)   | 65.39)   | 0.34)  |        | 50.00)   | 57.98)   | 1.16)   |        | 1.26)  | 1.52)  | 1.22)   |        |
|                   |   |   |   |   | 193.20   | 209.70   | 0.28   |        | 35.35    | 26.02    | -1.10   |        | 0.42   | 0.25   | -1.86   |        |
| Belgium           | — | — | — | — | (186.98, | (202.97, | (0.24, | <0.001 | (32.74,  | (23.72,  | (-1.46, | <0.001 | (0.18, | (0.08, | (-2.67, | <0.001 |
|                   |   |   |   |   | 199.58)  | 216.60)  | 0.31)  |        | 38.12)   | 28.50)   | -0.73)  |        | 0.85)  | 0.63)  | -1.05)  |        |
|                   |   |   |   |   | 215.36   | 259.20   | 0.64   |        | 74.38    | 106.68   | 1.29    |        | 1.04   | 1.57   | 1.38    |        |
| Belize            | — | — | — | — | (173.17, | (227.44, | (0.61, | <0.001 | (48.63,  | (85.83,  | (0.64,  | <0.001 | (0.00, | (0.08, | (0.57,  | 0.001  |
|                   |   |   |   |   | 266.62)  | 294.43)  | 0.67)  |        | 110.41)  | 131.24)  | 1.93)   |        | 16.05) | 7.68)  | 2.20)   |        |
|                   |   |   |   |   | 738.15   | 802.13   | 0.29   |        | 159.56   | 135.46   | -0.56   |        | 2.00   | 1.53   | -0.91   |        |
| Benin             | — | — | — | — | (719.44, | (790.91, | (0.27, | <0.001 | (150.57, | (130.68, | (-0.68, | <0.001 | (1.09, | (1.05, | (-1.09, | <0.001 |
|                   |   |   |   |   | 757.27)  | 813.49)  | 0.31)  |        | 168.99)  | 140.39)  | -0.44)  |        | 3.39)  | 2.18)  | -0.73)  |        |
|                   |   |   |   |   | 363.78   | 380.65   | 0.15   |        | 95.38    | 67.09    | -1.21   |        | 1.27   | 0.78   | -1.70   |        |
| Bermuda           | — | — | — | — | (263.31, | (258.36, | (0.14, | <0.001 | (49.41,  | (24.16,  | (-1.40, | <0.001 | (0.00, | (0.00, | (-1.99, | <0.001 |
|                   |   |   |   |   | 493.15)  | 543.29)  | 0.16)  |        | 171.32)  | 152.85)  | -1.02)  |        | 41.92) | 53.54) | -1.41)  |        |
|                   |   |   |   |   | 75.03    | 84.07    | 0.40   |        | 37.20    | 34.21    | -0.28   |        | 0.57   | 0.50   | -0.47   |        |
| Bhutan            | — | — | — | — | (61.11,  | (71.24,  | (0.38, | <0.001 | (27.06,  | (26.30,  | (-0.42, | <0.001 | (0.00, | (0.01, | (-0.63, | <0.001 |
|                   |   |   |   |   | 91.60)   | 98.62)   | 0.42)  |        | 50.23)   | 43.84)   | -0.15)  |        | 4.98)  | 3.15)  | -0.31)  |        |
| Bolivia           |   |   |   |   | 196.67   | 233.43   | 0.60   |        | 86.89    | 50.48    | -1.87   |        | 1.26   | 0.62   | -2.44   |        |
| (Plurinational    | — | — | — | — | (189.17, | (227.50, | (0.58, | <0.001 | (81.62,  | (47.70,  | (-1.97, | <0.001 | (0.70, | (0.35, | (-2.57, | <0.001 |
| State of)         |   |   |   |   | 204.43)  | 239.47)  | 0.62)  |        | 92.42)   | 53.39)   | -1.77)  |        | 2.13)  | 1.03)  | -2.31)  |        |
|                   |   |   |   |   | 212.25   | 217.63   | 0.08   |        | 52.74    | 27.52    | -2.42   |        | 0.71   | 0.27   | -3.63   |        |
| Bosnia and        | — | — | — | — | (203.26, | (204.86, | (0.05, | <0.001 | (48.35,  | (23.20,  | (-2.96, | <0.001 | (0.29, | (0.02, | (-4.26, | <0.001 |
| Herzegovina       |   |   |   |   | 221.54)  | 231.02)  | 0.12)  |        | 57.44)   | 32.46)   | -1.87)  |        | 1.47)  | 1.28)  | -2.99)  |        |
|                   |   |   |   |   | 230.23   | 243.07   | 0.18   |        | 67.66    | 56.46    | -0.57   |        | 0.94   | 0.73   | -0.81   |        |
| Botswana          | — | — | — | — | (211.67, | (229.74, | (0.14, | <0.001 | (57.08,  | (50.21,  | (-0.81, | <0.001 | (0.10, | (0.20, | (-1.14, | <0.001 |
|                   |   |   |   |   | 250.19)  | 256.97)  | 0.23)  |        | 79.79)   | 63.28)   | -0.33)  |        | 3.76)  | 1.93)  | -0.49)  |        |
|                   |   |   |   |   | 139.08   | 163.67   | 0.56   |        | 55.92    | 49.60    | -0.36   |        | 0.83   | 0.69   | -0.56   |        |
| Brazil            | — | — | — | — | (137.80, | (162.44, | (0.55, | <0.001 | (55.07,  | (48.93,  | (-0.56, | <0.001 | (0.72, | (0.62, | (-0.74, | <0.001 |
|                   |   |   |   |   | 140.37)  | 164.91)  | 0.57)  |        | 56.78)   | 50.27)   | -0.17)  |        | 0.94)  | 0.77)  | -0.37)  |        |
|                   |   |   |   |   | 58.77    | 60.37    | 0.09   |        | 34.67    | 20.83    | -1.71   |        | 0.53   | 0.30   | -1.84   |        |
| Brunei Darussalam | — | — | — | — | (41.77,  | (46.65,  | (0.07, | <0.001 | (21.99,  | (13.29,  | (-1.96, | <0.001 | (0.00, | (0.00, | (-2.15, | <0.001 |
|                   |   |   |   |   | 80.70)   | 77.15)   | 0.11)  |        | 52.36)   | 31.47)   | -1.46)  |        | 7.39)  | 4.71)  | -1.52)  |        |

|                          |   |   |   |   |          |          |         |        |          |          |         |        |        |        |         |        |
|--------------------------|---|---|---|---|----------|----------|---------|--------|----------|----------|---------|--------|--------|--------|---------|--------|
|                          |   |   |   |   | 643.23   | 668.96   | 0.13    |        | 207.70   | 157.52   | -0.92   |        | 2.99   | 2.10   | -1.17   |        |
| Bulgaria                 | — | — | — | — | (630.31, | (651.90, | (0.12,  | <0.001 | (200.54, | (149.96, | (-1.30, | <0.001 | (2.19, | (1.34, | (-1.62, | <0.001 |
|                          |   |   |   |   | 656.36)  | 686.39)  | 0.15)   |        | 215.06)  | 165.41)  | -0.53)  |        | 3.99)  | 3.21)  | -0.71)  |        |
|                          |   |   |   |   | 475.54   | 502.44   | 0.19    |        | 114.72   | 115.58   | 0.11    |        | 1.50   | 1.48   | 0.06    |        |
| Burkina Faso             | — | — | — | — | (464.55, | (495.67, | (0.17,  | <0.001 | (108.96, | (112.18, | (-0.20, | 0.483  | (0.89, | (1.11, | (-0.34, | 0.776  |
|                          |   |   |   |   | 486.76)  | 509.30)  | 0.21)   |        | 120.74)  | 119.07)  | 0.42)   |        | 2.39)  | 1.94)  | 0.46)   |        |
|                          |   |   |   |   | 302.50   | 334.74   | 0.36    |        | 121.98   | 81.54    | -1.40   |        | 1.76   | 1.06   | -1.75   |        |
| Burundi                  | — | — | — | — | (291.83, | (327.24, | (0.31,  | <0.001 | (115.07, | (77.79,  | (-1.58, | <0.001 | (1.02, | (0.67, | (-1.97, | <0.001 |
|                          |   |   |   |   | 313.48)  | 342.37)  | 0.40)   |        | 129.22)  | 85.43)   | -1.21)  |        | 2.89)  | 1.60)  | -1.54)  |        |
|                          |   |   |   |   | 1094.58  | 1180.88  |         |        | 188.78   | 136.57   | -1.26   |        | 2.19   | 1.18   | -2.39   |        |
| Cabo Verde               | — | — | — | — | (1014.78 | (1121.65 | 0.26    |        | 153.45,  | (117.08, | (-1.49, | <0.001 | (0.06, | (0.09, | (-2.74, | <0.001 |
|                          |   |   |   |   | ,        | ,        | (0.25,  | <0.001 | (153.45, | (117.08, | (-1.49, | <0.001 | (0.06, | (0.09, | (-2.74, | <0.001 |
|                          |   |   |   |   | 1180.93) | 1242.50) | 0.27)   |        | 231.61)  | 158.47)  | -1.03)  |        | 15.49) | 5.24)  | -2.04)  |        |
|                          |   |   |   |   | 88.13    | 101.40   | 0.49    |        | 37.99    | 27.93    | -1.04   |        | 0.56   | 0.38   | -1.27   |        |
| Cambodia                 | — | — | — | — | (83.80,  | (98.14,  | (0.47,  | <0.001 | (35.03,  | (26.22,  | (-1.15, | <0.001 | (0.25, | (0.20, | (-1.35, | <0.001 |
|                          |   |   |   |   | 92.64)   | 104.75)  | 0.51)   |        | 41.16)   | 29.72)   | -0.93)  |        | 1.12)  | 0.64)  | -1.18)  |        |
|                          |   |   |   |   | 625.55   | 737.79   | 0.57    |        | 139.27   | 143.70   | 0.11    |        | 1.77   | 1.74   | -0.07   |        |
| Cameroon                 | — | — | — | — | (614.22, | (730.98, | (0.52,  | <0.001 | (133.70, | (140.60, | (0.03,  | 0.006  | (1.18, | (1.41, | (-0.16, | 0.173  |
|                          |   |   |   |   | 637.05)  | 744.64)  | 0.63)   |        | 145.02)  | 146.85)  | 0.18)   |        | 2.57)  | 2.13)  | 0.03)   |        |
|                          |   |   |   |   | 222.60   | 216.06   | -0.10   |        | 31.29    | 27.86    | -0.42   |        | 0.33   | 0.28   | -0.58   |        |
| Canada                   | — | — | — | — | (218.74, | (212.33, | (-0.11, | <0.001 | (29.86,  | (26.54,  | (-0.63, | <0.001 | (0.20, | (0.16, | (-1.07, | 0.019  |
|                          |   |   |   |   | 226.51)  | 219.84)  | -0.10)  |        | 32.78)   | 29.23)   | -0.22)  |        | 0.52)  | 0.45)  | -0.10)  |        |
|                          |   |   |   |   | 266.06   | 264.47   | -0.02   |        | 85.03    | 77.53    | -0.37   |        | 1.19   | 1.07   | -0.42   |        |
| Central African Republic | — | — | — | — | (252.15, | (254.59, | (-0.04, | 0.016  | (76.93,  | (72.00,  | (-0.65, | 0.010  | (0.41, | (0.50, | (-0.73, | 0.007  |
|                          |   |   |   |   | 280.63)  | 274.66)  | -0.00)  |        | 93.83)   | 83.39)   | -0.09)  |        | 2.81)  | 2.01)  | -0.12)  |        |
|                          |   |   |   |   | 531.76   | 564.13   | 0.20    |        | 125.25   | 124.60   | 0.05    |        | 1.60   | 1.56   | -0.03   |        |
| Chad                     | — | — | — | — | (517.56, | (555.30, | (0.17,  | <0.001 | (118.12, | (120.26, | (-0.29, | 0.758  | (0.88, | (1.10, | (-0.54, | 0.898  |
|                          |   |   |   |   | 546.28)  | 573.09)  | 0.22)   |        | 132.72)  | 129.07)  | 0.40)   |        | 2.72)  | 2.17)  | 0.47)   |        |
|                          |   |   |   |   | 85.63    | 125.92   | 1.32    |        | 26.50    | 25.16    | -0.12   |        | 0.37   | 0.31   | -0.54   |        |
| Chile                    | — | — | — | — | (82.32,  | (122.17, | (1.24,  | <0.001 | (24.61,  | (23.51,  | (-0.52, | 0.546  | (0.18, | (0.16, | (-1.04, | 0.032  |
|                          |   |   |   |   | 89.05)   | 129.76)  | 1.40)   |        | 28.50)   | 26.89)   | 0.28)   |        | 0.69)  | 0.57)  | -0.05)  |        |
|                          |   |   |   |   | 57.83    | 89.39    | 1.50    |        | 23.00    | 16.73    | -1.11   |        | 0.33   | 0.20   | -1.73   |        |
| China                    | — | — | — | — | (57.55,  | (89.01,  | (1.42,  | <0.001 | (22.82,  | (16.57,  | (-1.48, | <0.001 | (0.31, | (0.18, | (-1.94, | <0.001 |

|                                 |   |   |   |   |          |          |         |        |          |          |         |        |         |         |         |        |
|---------------------------------|---|---|---|---|----------|----------|---------|--------|----------|----------|---------|--------|---------|---------|---------|--------|
|                                 |   |   |   |   | 58.11)   | 89.76)   | 1.59)   |        | 23.18)   | 16.89)   | -0.74)  | 0.35)  | 0.22)   | -1.51)  |         |        |
|                                 |   |   |   |   | 156.90   | 196.52   | 0.77    |        | 50.31    | 34.83    | -1.43   | 0.70   | 0.41    | -2.03   |         |        |
| Colombia                        | — | — | — | — | (153.99, | (193.72, | (0.75,  | <0.001 | (48.61,  | (33.65,  | (-1.77, | <0.001 | (0.51,  | (0.29,  | (-2.79, | <0.001 |
|                                 |   |   |   |   | 159.85)  | 199.35)  | 0.79)   |        | 52.05)   | 36.03)   | -1.09)  |        | 0.94)   | 0.56)   | -1.26)  |        |
|                                 |   |   |   |   | 353.02   | 389.54   | 0.34    |        | 86.42    | 69.18    | -0.79   |        | 1.14    | 0.81    | -1.20   |        |
| Comoros                         | — | — | — | — | (313.62, | (358.64, | (0.32,  | <0.001 | (66.56,  | (56.38,  | (-2.62, | 0.402  | (0.01,  | (0.03,  | (-3.66, | 0.348  |
|                                 |   |   |   |   | 396.70)  | 422.50)  | 0.36)   |        | 110.96)  | 84.13)   | 1.07)   |        | 8.61)   | 4.26)   | 1.32)   |        |
|                                 |   |   |   |   | 334.07   | 357.65   | 0.25    |        | 97.52    | 65.33    | -1.40   |        | 1.35    | 0.78    | -1.75   |        |
| Congo                           | — | — | — | — | (317.79, | (346.21, | (0.19,  | <0.001 | (88.29,  | (60.44,  | (-1.86, | <0.001 | (0.46,  | (0.33,  | (-2.17, | <0.001 |
|                                 |   |   |   |   | 351.07)  | 369.38)  | 0.31)   |        | 107.54)  | 70.52)   | -0.94)  |        | 3.19)   | 1.55)   | -1.33)  |        |
|                                 |   |   |   |   | 213.91   | 230.13   | 0.25    |        | 85.26    | 74.99    | -0.44   |        | 1.23    | 1.05    | -0.52   |        |
| Cook Islands                    | — | — | — | — | (98.73,  | (89.45,  | (0.22,  | <0.001 | (19.57,  | (9.46,   | (-0.62, | <0.001 | (0.00,  | (0.00,  | (-0.74, | <0.001 |
|                                 |   |   |   |   | 421.16)  | 491.75)  | 0.28)   |        | 253.63)  | 272.97)  | -0.25)  |        | 123.35) | 145.97) | -0.30)  |        |
|                                 |   |   |   |   | 157.40   | 190.23   | 0.65    |        | 36.39    | 48.90    | 1.18    |        | 0.47    | 0.66    | 1.35    |        |
| Costa Rica                      | — | — | — | — | (147.94, | (181.45, | (0.64,  | <0.001 | (31.78,  | (44.54,  | (0.59,  | <0.001 | (0.09,  | (0.25,  | (0.54,  | 0.001  |
|                                 |   |   |   |   | 167.35)  | 199.34)  | 0.67)   |        | 41.50)   | 53.59)   | 1.79)   |        | 1.48)   | 1.44)   | 2.17)   |        |
|                                 |   |   |   |   | 699.95   | 730.41   | 0.15    |        | 160.21   | 131.52   | -0.68   |        | 2.03    | 1.53    | -0.98   |        |
| Cote d'Ivoire                   | — | — | — | — | (689.55, | (723.34, | (0.13,  | <0.001 | (155.12, | (128.47, | (-0.85, | <0.001 | (1.49,  | (1.21,  | (-1.19, | <0.001 |
|                                 |   |   |   |   | 710.47)  | 737.54)  | 0.17)   |        | 165.45)  | 134.62)  | -0.51)  |        | 2.73)   | 1.90)   | -0.76)  |        |
|                                 |   |   |   |   | 121.90   | 116.39   | -0.16   |        | 41.85    | 16.52    | -3.16   |        | 0.62    | 0.18    | -4.29   |        |
| Croatia                         | — | — | — | — | (114.82, | (108.07, | (-0.17, | <0.001 | (37.89,  | (13.57,  | (-3.54, | <0.001 | (0.23,  | (0.01,  | (-4.96, | <0.001 |
|                                 |   |   |   |   | 129.32)  | 125.21)  | -0.14)  |        | 46.14)   | 19.97)   | -2.78)  |        | 1.39)   | 1.02)   | -3.61)  |        |
|                                 |   |   |   |   | 122.48   | 130.25   | 0.21    |        | 25.79    | 25.96    | -0.03   |        | 0.32    | 0.32    | -0.08   |        |
| Cuba                            | — | — | — | — | (118.21, | (125.04, | (0.20,  | <0.001 | (23.79,  | (23.70,  | (-0.27, | 0.776  | (0.13,  | (0.12,  | (-0.45, | 0.651  |
|                                 |   |   |   |   | 126.88)  | 135.64)  | 0.22)   |        | 27.93)   | 28.39)   | 0.20)   |        | 0.66)   | 0.71)   | 0.28)   |        |
|                                 |   |   |   |   | 90.66    | 92.35    | 0.06    |        | 27.45    | 23.08    | -0.59   |        | 0.39    | 0.31    | -0.78   |        |
| Cyprus                          | — | — | — | — | (76.41,  | (80.39,  | (0.04,  | <0.001 | (19.90,  | (17.60,  | (-0.92, | <0.001 | (0.00,  | (0.00,  | (-1.33, | 0.006  |
|                                 |   |   |   |   | 106.86)  | 105.84)  | 0.08)   |        | 37.00)   | 30.08)   | -0.26)  |        | 3.27)   | 2.83)   | -0.22)  |        |
|                                 |   |   |   |   | 360.29   | 364.27   | 0.04    |        | 81.69    | 47.79    | -1.88   |        | 1.10    | 0.49    | -2.80   |        |
| Czechia                         | — | — | — | — | (351.66, | (354.54, | (0.03,  | <0.001 | (77.70,  | (44.48,  | (-2.22, | <0.001 | (0.68,  | (0.22,  | (-3.33, | <0.001 |
|                                 |   |   |   |   | 369.09)  | 374.22)  | 0.05)   |        | 85.84)   | 51.31)   | -1.53)  |        | 1.68)   | 1.01)   | -2.28)  |        |
| Democratic<br>People's Republic | — | — | — | — | 72.44    | 71.45    | -0.05   | <0.001 | 27.15    | 22.73    | -0.62   | <0.001 | 0.39    | 0.31    | -0.75   | <0.001 |
|                                 |   |   |   |   | (69.80,  | (69.17,  | (-0.07, |        | (25.53,  | (21.46,  | (-0.65, |        | (0.22,  | (0.18,  | (-0.85, |        |

|                   |   |   |   |   |          |          |         |        |          |          |         |        |        |        |         |        |
|-------------------|---|---|---|---|----------|----------|---------|--------|----------|----------|---------|--------|--------|--------|---------|--------|
| of Korea          |   |   |   |   | 75.17)   | 73.79)   | -0.04)  |        | 28.85)   | 24.05)   | -0.58)  |        | 0.65)  | 0.51)  | -0.66)  |        |
| Democratic        |   |   |   |   | 305.08   | 311.49   | 0.08    |        | 70.16    | 63.04    | -0.36   |        | 0.91   | 0.78   | -0.53   |        |
| Republic of the   | — | — | — | — | (301.04, | (308.90, | (0.06,  | <0.001 | (68.14,  | (61.83,  | (-0.48, | <0.001 | (0.69, | (0.65, | (-0.67, | <0.001 |
| Congo             |   |   |   |   | 309.17)  | 314.10)  | 0.10)   |        | 72.24)   | 64.26)   | -0.24)  |        | 1.19)  | 0.94)  | -0.38)  |        |
|                   |   |   |   |   | 158.46   | 153.42   | -0.11   |        | 35.25    | 21.00    | -1.84   |        | 0.47   | 0.22   | -2.68   |        |
| Denmark           | — | — | — | — | (150.70, | (145.56, | (-0.19, | 0.004  | (31.67,  | (18.16,  | (-2.21, | <0.001 | (0.14, | (0.03, | (-3.44, | <0.001 |
|                   |   |   |   |   | 166.54)  | 161.62)  | -0.04)  |        | 39.15)   | 24.18)   | -1.46)  |        | 1.15)  | 0.83)  | -1.91)  |        |
|                   |   |   |   |   | 352.23   | 400.46   | 0.45    |        | 93.21    | 79.68    | -0.47   |        | 1.24   | 0.96   | -0.74   |        |
| Djibouti          | — | — | — | — | (318.04, | (376.64, | (0.42,  | <0.001 | (75.29,  | (69.23,  | (-1.01, | 0.091  | (0.05, | (0.16, | (-1.47, | 0.051  |
|                   |   |   |   |   | 389.55)  | 425.41)  | 0.48)   |        | 114.52)  | 91.26)   | 0.08)   |        | 6.95)  | 3.10)  | 0.00)   |        |
|                   |   |   |   |   | 147.68   | 151.19   | 0.08    |        | 98.20    | 88.40    | -0.37   |        | 1.54   | 1.38   | -0.47   |        |
| Dominica          | — | — | — | — | (93.35,  | (92.34,  | (0.06,  | <0.001 | (53.23,  | (45.06,  | (-0.53, | <0.001 | (0.00, | (0.00, | (-0.74, | 0.001  |
|                   |   |   |   |   | 225.15)  | 233.87)  | 0.10)   |        | 167.95)  | 156.19)  | -0.21)  |        | 34.27) | 31.55) | -0.20)  |        |
|                   |   |   |   |   | 269.77   | 311.37   | 0.50    |        | 87.28    | 87.88    | 0.08    |        | 1.21   | 1.19   | -0.01   |        |
| Dominican         | — | — | — | — | (261.61, | (304.18, | (0.48,  | <0.001 | (82.46,  | (84.06,  | (-0.27, | 0.674  | (0.70, | (0.78, | (-0.45, | 0.976  |
| Republic          |   |   |   |   | 278.15)  | 318.69)  | 0.51)   |        | 92.34)   | 91.82)   | 0.42)   |        | 1.99)  | 1.74)  | 0.44)   |        |
|                   |   |   |   |   | 143.80   | 164.78   | 0.47    |        | 76.47    | 42.14    | -2.15   |        | 1.14   | 0.55   | -2.59   |        |
| Ecuador           | — | — | — | — | (138.83, | (160.69, | (0.46,  | <0.001 | (72.64,  | (40.04,  | (-2.55, | <0.001 | (0.71, | (0.33, | (-3.05, | <0.001 |
|                   |   |   |   |   | 148.93)  | 168.96)  | 0.48)   |        | 80.47)   | 44.31)   | -1.75)  |        | 1.75)  | 0.85)  | -2.12)  |        |
|                   |   |   |   |   | 766.20   | 892.35   | 0.54    |        | 148.38   | 150.44   | 0.04    |        | 1.76   | 1.67   | -0.20   |        |
| Egypt             | — | — | — | — | (761.14, | (888.33, | (0.51,  | <0.001 | (146.11, | (148.79, | (-0.24, | 0.791  | (1.52, | (1.50, | (-0.59, | 0.314  |
|                   |   |   |   |   | 771.28)  | 896.39)  | 0.56)   |        | 150.67)  | 152.11)  | 0.32)   |        | 2.03)  | 1.85)  | 0.19)   |        |
|                   |   |   |   |   | 162.58   | 213.03   | 0.93    |        | 81.94    | 41.52    | -2.30   |        | 1.22   | 0.51   | -2.94   |        |
| El Salvador       | — | — | — | — | (155.27, | (205.14, | (0.87,  | <0.001 | (76.21,  | (37.92,  | (-3.17, | <0.001 | (0.60, | (0.18, | (-4.11, | <0.001 |
|                   |   |   |   |   | 170.19)  | 221.18)  | 0.99)   |        | 88.02)   | 45.39)   | -1.41)  |        | 2.24)  | 1.15)  | -1.76)  |        |
|                   |   |   |   |   | 321.56   | 405.99   | 0.81    |        | 87.52    | 57.53    | -1.44   |        | 1.18   | 0.60   | -2.30   |        |
| Equatorial Guinea | — | — | — | — | (280.68, | (385.48, | (0.79,  | <0.001 | (65.96,  | (49.63,  | (-1.67, | <0.001 | (0.01, | (0.06, | (-2.66, | <0.001 |
|                   |   |   |   |   | 367.36)  | 427.50)  | 0.84)   |        | 114.41)  | 66.52)   | -1.22)  |        | 9.44)  | 2.62)  | -1.94)  |        |
|                   |   |   |   |   | 295.93   | 336.80   | 0.44    |        | 105.66   | 93.53    | -0.38   |        | 1.51   | 1.27   | -0.56   |        |
| Eritrea           | — | — | — | — | (282.11, | (327.52, | (0.42,  | <0.001 | (97.07,  | (88.52,  | (-0.63, | 0.003  | (0.64, | (0.74, | (-0.84, | <0.001 |
|                   |   |   |   |   | 310.34)  | 346.31)  | 0.47)   |        | 114.89)  | 98.78)   | -0.13)  |        | 3.12)  | 2.05)  | -0.27)  |        |
|                   |   |   |   |   | 101.73   | 107.35   | 0.19    |        | 42.65    | 23.89    | -2.04   |        | 0.64   | 0.32   | -2.73   |        |
| Estonia           | — | — | — | — | (90.07,  | (92.09,  | (0.18,  | <0.001 | (35.47,  | (17.70,  | (-3.76, | 0.023  | (0.07, | (0.00, | (-4.18, | <0.001 |

|          |   |   |   |   |          |          |         |        |          |          |         |        |        |        |         |        |
|----------|---|---|---|---|----------|----------|---------|--------|----------|----------|---------|--------|--------|--------|---------|--------|
|          |   |   |   |   | 114.49)  | 124.52)  | 0.20)   |        | 50.90)   | 31.83)   | -0.28)  | 2.50)  | 3.04)  | -1.26) |         |        |
|          |   |   |   |   | 212.86   | 221.63   | 0.14    |        | 51.88    | 62.09    | 0.59    | 0.69   | 0.85   | 0.71   |         |        |
| Eswatini | — | — | — | — | (189.39, | (203.63, | (0.11,  | <0.001 | (39.69,  | (52.40,  | (0.36,  | <0.001 | (0.01, | (0.10, | (0.37,  | <0.001 |
|          |   |   |   |   | 238.88)  | 240.90)  | 0.16)   |        | 66.96)   | 73.13)   | 0.82)   |        | 5.25)  | 3.27)  | 1.05)   |        |
|          |   |   |   |   | 288.13   | 352.06   | 0.70    |        | 89.66    | 65.21    | -1.09   |        | 1.24   | 0.77   | -1.63   |        |
| Ethiopia | — | — | — | — | (284.62, | (349.57, | (0.67,  | <0.001 | (87.63,  | (64.11,  | (-1.20, | <0.001 | (1.01, | (0.65, | (-1.81, | <0.001 |
|          |   |   |   |   | 291.67)  | 354.57)  | 0.73)   |        | 91.73)   | 66.32)   | -0.98)  |        | 1.51)  | 0.90)  | -1.46)  |        |
|          |   |   |   |   | 319.67   | 336.33   | 0.18    |        | 184.93   | 154.40   | -0.66   |        | 2.78   | 2.25   | -0.77   |        |
| Fiji     | — | — | — | — | (293.16, | (310.20, | (0.17,  | <0.001 | (164.44, | (136.96, | (-1.14, | 0.007  | (0.82, | (0.63, | (-1.31, | 0.006  |
|          |   |   |   |   | 348.09)  | 364.09)  | 0.19)   |        | 207.39)  | 173.47)  | -0.18)  |        | 7.07)  | 5.71)  | -0.22)  |        |
|          |   |   |   |   | 130.87   | 118.82   | -0.33   |        | 33.85    | 23.30    | -1.32   |        | 0.46   | 0.29   | -1.84   |        |
| Finland  | — | — | — | — | (123.42, | (111.49, | (-0.38, | <0.001 | (30.25,  | (20.22,  | (-1.85, | <0.001 | (0.14, | (0.05, | (-2.33, | <0.001 |
|          |   |   |   |   | 138.67)  | 126.53)  | -0.29)  |        | 37.80)   | 26.76)   | -0.79)  |        | 1.20)  | 0.98)  | -1.34)  |        |
|          |   |   |   |   | 257.14   | 255.25   | -0.03   |        | 56.69    | 34.15    | -1.75   |        | 0.74   | 0.35   | -2.59   |        |
| France   | — | — | — | — | (254.15, | (252.10, | (-0.04, | <0.001 | (55.31,  | (33.02,  | (-1.97, | <0.001 | (0.59, | (0.25, | (-3.19, | <0.001 |
|          |   |   |   |   | 260.15)  | 258.44)  | -0.02)  |        | 58.10)   | 35.32)   | -1.54)  |        | 0.92)  | 0.49)  | -2.00)  |        |
|          |   |   |   |   | 362.97   | 382.20   | 0.18    |        | 88.96    | 71.97    | -0.78   |        | 1.17   | 0.86   | -1.11   |        |
| Gabon    | — | — | — | — | (336.95, | (362.26, | (0.16,  | <0.001 | (75.97,  | (63.32,  | (-1.21, | 0.001  | (0.16, | (0.17, | (-1.69, | <0.001 |
|          |   |   |   |   | 390.59)  | 403.01)  | 0.20)   |        | 103.64)  | 81.51)   | -0.34)  |        | 4.25)  | 2.63)  | -0.54)  |        |
|          |   |   |   |   | 679.83   | 732.05   | 0.26    |        | 130.52   | 134.44   | 0.24    |        | 1.56   | 1.57   | 0.21    |        |
| Gambia   | — | — | — | — | (643.00, | (707.69, | (0.22,  | <0.001 | (114.08, | (123.77, | (-0.35, | 0.427  | (0.27, | (0.60, | (-0.62, | 0.623  |
|          |   |   |   |   | 718.49)  | 757.13)  | 0.30)   |        | 148.91)  | 145.87)  | 0.84)   |        | 5.34)  | 3.42)  | 1.04)   |        |
|          |   |   |   |   | 256.99   | 272.71   | 0.20    |        | 78.89    | 107.08   | 1.11    |        | 1.09   | 1.57   | 1.32    |        |
| Georgia  | — | — | — | — | (247.31, | (259.01, | (0.19,  | <0.001 | (73.60,  | (99.04,  | (0.05,  | 0.041  | (0.55, | (0.75, | (0.10,  | 0.034  |
|          |   |   |   |   | 266.96)  | 286.97)  | 0.21)   |        | 84.47)   | 115.66)  | 2.18)   |        | 1.94)  | 2.99)  | 2.56)   |        |
|          |   |   |   |   | 206.82   | 186.92   | -0.36   |        | 51.15    | 32.21    | -1.62   |        | 0.69   | 0.38   | -2.19   |        |
| Germany  | — | — | — | — | (204.53, | (184.59, | (-0.41, | <0.001 | (50.03,  | (31.27,  | (-1.87, | <0.001 | (0.57, | (0.29, | (-2.47, | <0.001 |
|          |   |   |   |   | 209.13)  | 189.28)  | -0.31)  |        | 52.29)   | 33.18)   | -1.38)  |        | 0.84)  | 0.50)  | -1.91)  |        |
|          |   |   |   |   | 734.50   | 763.03   | 0.14    |        | 144.77   | 135.92   | -0.22   |        | 1.75   | 1.57   | -0.37   |        |
| Ghana    | — | — | — | — | (724.60, | (756.43, | (0.09,  | <0.001 | (140.22, | (133.08, | (-0.32, | <0.001 | (1.27, | (1.28, | (-0.52, | <0.001 |
|          |   |   |   |   | 744.51)  | 769.66)  | 0.19)   |        | 149.44)  | 138.81)  | -0.12)  |        | 2.36)  | 1.92)  | -0.22)  |        |
|          |   |   |   |   | 104.29   | 95.47    | -0.30   |        | 27.66    | 21.10    | -0.92   |        | 0.37   | 0.27   | -1.18   |        |
| Greece   | — | — | — | — | (99.74,  | (90.37,  | (-0.33, | <0.001 | (25.34,  | (18.83,  | (-1.24, | <0.001 | (0.15, | (0.08, | (-1.64, | <0.001 |

|               |   |   |   |   |          |          |         |        |          |          |         |        |        |        |         |        |
|---------------|---|---|---|---|----------|----------|---------|--------|----------|----------|---------|--------|--------|--------|---------|--------|
|               |   |   |   |   | 109.00)  | 100.79)  | -0.28)  |        | 30.13)   | 23.58)   | -0.61)  |        | 0.77)  | 0.72)  | -0.73)  |        |
|               |   |   |   |   | 81.23    | 80.08    | -0.05   |        | 29.86    | 19.29    | -1.61   |        | 0.46   | 0.27   | -1.96   |        |
| Greenland     | — | — | — | — | (41.47,  | (35.61,  | (-0.06, | <0.001 | (8.80,   | (2.50,   | (-2.09, | <0.001 | (0.00, | (0.00, | (-2.66, | <0.001 |
|               |   |   |   |   | 150.93)  | 160.03)  | -0.03)  |        | 83.73)   | 75.74)   | -1.13)  |        | 42.39) | 45.73) | -1.25)  |        |
|               |   |   |   |   | 224.31   | 239.59   | 0.23    |        | 116.68   | 75.04    | -1.67   |        | 1.82   | 1.07   | -1.86   |        |
| Grenada       | — | — | — | — | (158.87, | (178.62, | (0.21,  | <0.001 | (69.01,  | (42.23,  | (-2.07, | <0.001 | (0.00, | (0.00, | (-2.79, | <0.001 |
|               |   |   |   |   | 310.08)  | 316.02)  | 0.25)   |        | 186.36)  | 124.47)  | -1.26)  |        | 31.48) | 22.97) | -0.93)  |        |
|               |   |   |   |   | 91.89    | 100.63   | 0.31    |        | 29.59    | 36.66    | 0.79    |        | 0.40   | 0.53   | 1.02    |        |
| Guam          | — | — | — | — | (62.47,  | (69.08,  | (0.29,  | <0.001 | (14.27,  | (18.57,  | (0.08,  | 0.028  | (0.00, | (0.00, | (0.18,  | 0.017  |
|               |   |   |   |   | 130.87)  | 142.29)  | 0.33)   |        | 54.89)   | 65.49)   | 1.50)   |        | 12.99) | 14.13) | 1.86)   |        |
|               |   |   |   |   | 216.54   | 330.39   | 1.47    |        | 107.63   | 65.28    | -1.75   |        | 1.61   | 0.80   | -2.44   |        |
| Guatemala     | — | — | — | — | (209.29, | (324.76, | (1.40,  | <0.001 | (102.11, | (62.69,  | (-2.31, | <0.001 | (0.99, | (0.53, | (-3.11, | <0.001 |
|               |   |   |   |   | 224.00)  | 336.11)  | 1.53)   |        | 113.39)  | 67.95)   | -1.19)  |        | 2.50)  | 1.17)  | -1.76)  |        |
|               |   |   |   |   | 665.78   | 766.49   | 0.48    |        | 138.58   | 147.03   | 0.19    |        | 1.71   | 1.75   | 0.07    |        |
| Guinea        | — | — | — | — | (650.10, | (755.15, | (0.47,  | <0.001 | (131.21, | (141.87, | (0.08,  | 0.001  | (0.97, | (1.22, | (-0.08, | 0.343  |
|               |   |   |   |   | 681.78)  | 777.99)  | 0.50)   |        | 146.28)  | 152.34)  | 0.30)   |        | 2.81)  | 2.46)  | 0.23)   |        |
|               |   |   |   |   | 228.94   | 258.72   | 0.41    |        | 169.22   | 142.17   | -0.60   |        | 2.60   | 2.13   | -0.68   |        |
| Guinea-Bissau | — | — | — | — | (207.25, | (243.04, | (0.39,  | <0.001 | (149.74, | (130.17, | (-0.70, | <0.001 | (0.72, | (0.89, | (-0.77, | <0.001 |
|               |   |   |   |   | 252.56)  | 275.26)  | 0.44)   |        | 190.77)  | 155.07)  | -0.50)  |        | 6.99)  | 4.42)  | -0.59)  |        |
|               |   |   |   |   | 118.34   | 133.94   | 0.43    |        | 116.62   | 117.89   | 0.09    |        | 1.87   | 1.91   | 0.12    |        |
| Guyana        | — | — | — | — | (103.18, | (117.23, | (0.40,  | <0.001 | (100.30, | (101.07, | (-0.55, | 0.786  | (0.36, | (0.36, | (-0.51, | 0.715  |
|               |   |   |   |   | 135.38)  | 152.58)  | 0.46)   |        | 135.00)  | 136.81)  | 0.73)   |        | 5.88)  | 5.97)  | 0.74)   |        |
|               |   |   |   |   | 152.28   | 173.58   | 0.45    |        | 111.85   | 96.10    | -0.46   |        | 1.78   | 1.50   | -0.53   |        |
| Haiti         | — | — | — | — | (145.26, | (168.52, | (0.44,  | <0.001 | (105.63, | (92.26,  | (-0.71, | <0.001 | (1.07, | (1.05, | (-0.81, | <0.001 |
|               |   |   |   |   | 159.57)  | 178.77)  | 0.47)   |        | 118.35)  | 100.07)  | -0.21)  |        | 2.79)  | 2.07)  | -0.25)  |        |
|               |   |   |   |   | 128.12   | 162.65   | 0.82    |        | 50.05    | 27.31    | -2.15   |        | 0.74   | 0.32   | -2.89   |        |
| Honduras      | — | — | — | — | (120.86, | (157.28, | (0.80,  | <0.001 | (45.12,  | (25.01,  | (-2.52, | <0.001 | (0.25, | (0.11, | (-3.32, | <0.001 |
|               |   |   |   |   | 135.76)  | 168.16)  | 0.84)   |        | 55.41)   | 29.79)   | -1.77)  |        | 1.73)  | 0.73)  | -2.46)  |        |
|               |   |   |   |   | 160.86   | 163.05   | 0.05    |        | 92.49    | 29.33    | -3.91   |        | 1.46   | 0.35   | -4.83   |        |
| Hungary       | — | — | — | — | (154.98, | (156.26, | (0.03,  | <0.001 | (88.27,  | (26.62,  | (-4.42, | <0.001 | (0.98, | (0.12, | (-5.47, | <0.001 |
|               |   |   |   |   | 166.91)  | 170.06)  | 0.07)   |        | 96.89)   | 32.27)   | -3.39)  |        | 2.12)  | 0.84)  | -4.18)  |        |
|               |   |   |   |   | 119.28   | 124.54   | 0.15    |        | 22.09    | 15.71    | -1.22   |        | 0.26   | 0.15   | -1.91   |        |
| Iceland       | — | — | — | — | (91.71,  | (98.17,  | (0.12,  | <0.001 | (11.31,  | (7.48,   | (-1.63, | <0.001 | (0.00, | (0.00, | (-2.66, | <0.001 |



|                               |   |   |   |   |          |          |         |        |          |         |         |        |        |        |         |        |
|-------------------------------|---|---|---|---|----------|----------|---------|--------|----------|---------|---------|--------|--------|--------|---------|--------|
|                               |   |   |   |   | 152.73)  | 156.30)  | 0.18)   |        | 39.07)   | 29.78)  | -0.80)  | 7.99)  | 7.74)  | -1.15) |         |        |
|                               |   |   |   |   | 100.15   | 91.58    | -0.33   |        | 47.81    | 42.41   | -0.41   | 0.73   | 0.65   | -0.39  |         |        |
| India                         | — | — | — | — | (99.69,  | (91.24,  | (-0.38, | <0.001 | (47.48,  | (42.18, | (-0.86, | 0.076  | (0.69, | (0.62, | (-0.99, | 0.199  |
|                               |   |   |   |   | 100.62)  | 91.92)   | -0.28)  |        | 48.15)   | 42.65)  | 0.04)   |        | 0.77)  | 0.68)  | 0.21)   |        |
|                               |   |   |   |   | 155.44   | 170.57   | 0.32    |        | 47.01    | 40.27   | -0.53   |        | 0.65   | 0.52   | -0.80   |        |
| Indonesia                     | — | — | — | — | (154.21, | (169.46, | (0.30,  | <0.001 | (46.32,  | (39.73, | (-0.62, | <0.001 | (0.57, | (0.46, | (-1.00, | <0.001 |
|                               |   |   |   |   | 156.68)  | 171.69)  | 0.34)   |        | 47.72)   | 40.81)  | -0.45)  |        | 0.74)  | 0.58)  | -0.60)  |        |
|                               |   |   |   |   | 463.37   | 495.11   | 0.23    |        | 74.48    | 83.30   | 0.36    |        | 0.83   | 0.94   | 0.38    |        |
| Iran (Islamic<br>Republic of) | — | — | — | — | (459.42, | (491.70, | (0.21,  | <0.001 | (72.86,  | (81.94, | (0.09,  | 0.010  | (0.66, | (0.80, | (0.05,  | 0.025  |
|                               |   |   |   |   | 467.35)  | 498.55)  | 0.25)   |        | 76.14)   | 84.68)  | 0.64)   |        | 1.03)  | 1.09)  | 0.72)   |        |
|                               |   |   |   |   | 240.12   | 264.16   | 0.33    |        | 75.82    | 43.87   | -1.86   |        | 1.07   | 0.50   | -2.58   |        |
| Iraq                          | — | — | — | — | (234.81, | (260.89, | (0.32,  | <0.001 | (72.76,  | (42.53, | (-2.04, | <0.001 | (0.73, | (0.36, | (-2.85, | <0.001 |
|                               |   |   |   |   | 245.53)  | 267.46)  | 0.34)   |        | 78.99)   | 45.26)  | -1.69)  |        | 1.52)  | 0.67)  | -2.30)  |        |
|                               |   |   |   |   | 154.89   | 152.54   | -0.06   |        | 38.42    | 23.24   | -1.76   |        | 0.51   | 0.26   | -2.31   |        |
| Ireland                       | — | — | — | — | (145.67, | (143.88, | (-0.11, | 0.031  | (33.88,  | (20.00, | (-2.19, | <0.001 | (0.12, | (0.03, | (-3.13, | <0.001 |
|                               |   |   |   |   | 164.55)  | 161.61)  | -0.01)  |        | 43.41)   | 26.87)  | -1.33)  |        | 1.42)  | 0.95)  | -1.48)  |        |
|                               |   |   |   |   | 125.68   | 130.15   | 0.12    |        | 23.35    | 18.78   | -0.70   |        | 0.27   | 0.20   | -1.05   |        |
| Israel                        | — | — | — | — | (118.63, | (124.68, | (0.11,  | <0.001 | (20.37,  | (16.74, | (-1.56, | 0.111  | (0.05, | (0.04, | (-2.02, | 0.038  |
|                               |   |   |   |   | 133.04)  | 135.80)  | 0.13)   |        | 26.67)   | 21.00)  | 0.16)   |        | 0.89)  | 0.56)  | -0.06)  |        |
|                               |   |   |   |   | 190.33   | 174.10   | -0.33   |        | 29.45    | 23.06   | -0.90   |        | 0.32   | 0.23   | -1.19   |        |
| Italy                         | — | — | — | — | (187.73, | (171.18, | (-0.40, | <0.001 | (28.43,  | (22.03, | (-1.27, | <0.001 | (0.22, | (0.14, | (-1.61, | <0.001 |
|                               |   |   |   |   | 192.95)  | 177.06)  | -0.25)  |        | 30.49)   | 24.13)  | -0.53)  |        | 0.44)  | 0.36)  | -0.77)  |        |
|                               |   |   |   |   | 181.73   | 207.71   | 0.47    |        | 35.13    | 49.00   | 1.13    |        | 0.43   | 0.66   | 1.44    |        |
| Jamaica                       | — | — | — | — | (169.73, | (196.26, | (0.41,  | <0.001 | (29.82,  | (43.44, | (-0.51, | 0.177  | (0.04, | (0.17, | (-0.78, | 0.206  |
|                               |   |   |   |   | 194.44)  | 219.67)  | 0.54)   |        | 41.19)   | 55.10)  | 2.80)   |        | 1.77)  | 1.77)  | 3.71)   |        |
|                               |   |   |   |   | 201.36   | 206.32   | 0.08    |        | 29.31    | 24.53   | -0.61   |        | 0.30   | 0.22   | -1.13   |        |
| Japan                         | — | — | — | — | (199.52, | (204.12, | (0.07,  | <0.001 | (28.61,  | (23.78, | (-0.85, | <0.001 | (0.24, | (0.16, | (-1.44, | <0.001 |
|                               |   |   |   |   | 203.21)  | 208.53)  | 0.09)   |        | 30.02)   | 25.29)  | -0.37)  |        | 0.39)  | 0.31)  | -0.82)  |        |
|                               |   |   |   |   | 281.33   | 299.55   | 0.21    |        | 44.78    | 33.79   | -0.95   |        | 0.50   | 0.29   | -1.82   |        |
| Jordan                        | — | — | — | — | (269.65, | (293.12, | (0.20,  | <0.001 | (39.97,  | (31.64, | (-1.33, | <0.001 | (0.11, | (0.12, | (-2.60, | <0.001 |
|                               |   |   |   |   | 293.48)  | 306.09)  | 0.23)   |        | 50.09)   | 36.04)  | -0.56)  |        | 1.54)  | 0.58)  | -1.02)  |        |
|                               |   |   |   |   | 121.54   | 133.64   | 0.33    |        | 118.04   | 62.26   | -2.15   |        | 1.90   | 0.96   | -2.30   |        |
| Kazakhstan                    | — | — | — | — | (117.86, | (129.62, | (0.31,  | <0.001 | (114.40, | (59.70, | (-3.17, | <0.001 | (1.47, | (0.67, | (-3.41, | <0.001 |

|              |   |   |   |   |          |          |        |        |          |          |         |        |        |        |         |        |
|--------------|---|---|---|---|----------|----------|--------|--------|----------|----------|---------|--------|--------|--------|---------|--------|
|              |   |   |   |   | 125.30)  | 137.77)  | 0.35)  |        | 121.76)  | 64.92)   | -1.12)  | 2.43)  | 1.34)  | -1.17) |         |        |
|              |   |   |   |   | 473.44   | 478.96   | 0.03   |        | 71.64    | 73.40    | 0.05    | 0.77   | 0.79   | 0.07   |         |        |
| Kenya        | — | — | — | — | (466.94, | (474.85, | (0.01, | 0.011  | (69.01,  | (71.75,  | (-0.04, | 0.294  | (0.51, | (0.63, | (-0.19, | 0.606  |
|              |   |   |   |   | 480.01)  | 483.10)  | 0.06)  |        | 74.35)   | 75.07)   | 0.14)   |        | 1.13)  | 0.99)  | 0.33)   |        |
|              |   |   |   |   | 174.58   | 187.41   | 0.25   |        | 259.90   | 235.61   | -0.34   |        | 4.26   | 3.84   | -0.35   |        |
| Kiribati     | — | — | — | — | (114.72, | (136.88, | (0.22, | <0.001 | (182.32, | (177.28, | (-0.44, | <0.001 | (0.01, | (0.06, | (-0.47, | <0.001 |
|              |   |   |   |   | 257.74)  | 251.35)  | 0.27)  |        | 361.46)  | 307.59)  | -0.23)  |        | 39.62) | 24.59) | -0.24)  |        |
|              |   |   |   |   | 163.98   | 175.33   | 0.23   |        | 28.44    | 27.87    | -0.16   |        | 0.31   | 0.30   | -0.28   |        |
| Kuwait       | — | — | — | — | (152.31, | (166.37, | (0.19, | <0.001 | (23.80,  | (24.51,  | (-1.03, | 0.729  | (0.02, | (0.06, | (-1.67, | 0.697  |
|              |   |   |   |   | 176.42)  | 184.70)  | 0.27)  |        | 33.87)   | 31.65)   | 0.73)   |        | 1.69)  | 1.09)  | 1.13)   |        |
|              |   |   |   |   | 127.19   | 134.24   | 0.19   |        | 66.28    | 45.07    | -1.25   |        | 1.01   | 0.65   | -1.36   |        |
| Kyrgyzstan   | — | — | — | — | (120.09, | (128.05, | (0.18, | <0.001 | (60.98,  | (41.51,  | (-2.42, | 0.040  | (0.45, | (0.29, | (-2.70, | 0.050  |
|              |   |   |   |   | 134.63)  | 140.66)  | 0.20)  |        | 71.94)   | 48.86)   | -0.06)  |        | 1.98)  | 1.28)  | 0.00)   |        |
| Lao People's |   |   |   |   | 95.71    | 112.86   | 0.57   |        | 43.80    | 43.16    | -0.02   |        | 0.65   | 0.62   | -0.16   |        |
| Democratic   | — | — | — | — | (88.78,  | (107.71, | (0.55, | <0.001 | (39.00,  | (39.97,  | (-0.19, | 0.869  | (0.19, | (0.29, | (-0.43, | 0.235  |
| Republic     |   |   |   |   | 103.09)  | 118.20)  | 0.59)  |        | 49.05)   | 46.54)   | 0.16)   |        | 1.66)  | 1.16)  | 0.11)   |        |
|              |   |   |   |   | 20.88    | 21.97    | 0.18   |        | 28.13    | 22.25    | -0.84   |        | 0.46   | 0.37   | -0.77   |        |
| Latvia       | — | — | — | — | (16.91,  | (16.46,  | (0.15, | <0.001 | (23.62,  | (17.37,  | (-2.86, | 0.424  | (0.07, | (0.02, | (-2.76, | 0.451  |
|              |   |   |   |   | 25.52)   | 28.83)   | 0.21)  |        | 33.29)   | 28.31)   | 1.23)   |        | 1.63)  | 2.34)  | 1.25)   |        |
|              |   |   |   |   | 591.54   | 671.44   | 0.44   |        | 126.70   | 120.68   | -0.15   |        | 1.59   | 1.40   | -0.41   |        |
| Lebanon      | — | — | — | — | (572.00, | (655.50, | (0.43, | <0.001 | (117.53, | (114.07, | (-0.25, | 0.003  | (0.71, | (0.78, | (-0.47, | <0.001 |
|              |   |   |   |   | 611.63)  | 687.68)  | 0.46)  |        | 136.45)  | 127.61)  | -0.05)  |        | 3.13)  | 2.37)  | -0.34)  |        |
|              |   |   |   |   | 199.55   | 207.60   | 0.15   |        | 46.04    | 60.17    | 0.92    |        | 0.60   | 0.83   | 1.13    |        |
| Lesotho      | — | — | — | — | (184.86, | (195.02, | (0.03, | 0.012  | (38.75,  | (53.40,  | (0.71,  | <0.001 | (0.06, | (0.22, | (0.82,  | <0.001 |
|              |   |   |   |   | 215.22)  | 220.80)  | 0.26)  |        | 54.38)   | 67.57)   | 1.13)   |        | 2.50)  | 2.18)  | 1.43)   |        |
|              |   |   |   |   | 517.88   | 594.93   | 0.48   |        | 133.31   | 110.34   | -0.72   |        | 1.76   | 1.31   | -1.10   |        |
| Liberia      | — | — | — | — | (492.26, | (579.80, | (0.46, | <0.001 | (120.30, | (103.70, | (-1.05, | <0.001 | (0.57, | (0.67, | (-1.54, | <0.001 |
|              |   |   |   |   | 544.56)  | 610.37)  | 0.50)  |        | 147.42)  | 117.32)  | -0.38)  |        | 4.22)  | 2.32)  | -0.66)  |        |
|              |   |   |   |   | 368.54   | 441.36   | 0.62   |        | 83.06    | 86.89    | 0.13    |        | 1.03   | 1.04   | -0.01   |        |
| Libya        | — | — | — | — | (355.96, | (430.86, | (0.57, | <0.001 | (77.06,  | (82.32,  | (-0.44, | 0.666  | (0.46, | (0.60, | (-0.76, | 0.982  |
|              |   |   |   |   | 381.48)  | 452.06)  | 0.66)  |        | 89.44)   | 91.66)   | 0.70)   |        | 2.04)  | 1.70)  | 0.75)   |        |
|              |   |   |   |   | 103.68   | 112.48   | 0.30   |        | 44.97    | 39.20    | -0.69   |        | 0.68   | 0.58   | -0.69   |        |
| Lithuania    | — | — | — | — | (96.21,  | (102.24, | (0.23, | <0.001 | (40.14,  | (33.60,  | (-1.54, | 0.109  | (0.21, | (0.11, | (-1.64, | 0.161  |

|                  |   |   |   |   |          |          |         |        |          |          |         |        |        |        |         |        |
|------------------|---|---|---|---|----------|----------|---------|--------|----------|----------|---------|--------|--------|--------|---------|--------|
|                  |   |   |   |   | 111.59)  | 123.53)  | 0.36)   |        | 50.24)   | 45.58)   | 0.16)   |        | 1.64)  | 2.03)  | 0.27)   |        |
|                  |   |   |   |   | 262.72   | 270.62   | 0.10    |        | 61.54    | 32.23    | -2.17   |        | 0.80   | 0.30   | -3.25   |        |
| Luxembourg       | — | — | — | — | (226.62, | (239.77, | (0.09,  | <0.001 | (45.09,  | (22.45,  | (-2.88, | <0.001 | (0.00, | (0.00, | (-4.18, | <0.001 |
|                  |   |   |   |   | 303.56)  | 304.68)  | 0.11)   |        | 82.84)   | 45.33)   | -1.46)  |        | 8.33)  | 5.18)  | -2.31)  |        |
|                  |   |   |   |   | 586.28   | 655.11   | 0.38    |        | 236.49   | 171.56   | -1.07   |        | 3.44   | 2.28   | -1.36   |        |
| Madagascar       | — | — | — | — | (576.33, | (648.36, | (0.33,  | <0.001 | (229.91, | (167.99, | (-1.47, | <0.001 | (2.68, | (1.88, | (-1.76, | <0.001 |
|                  |   |   |   |   | 596.37)  | 661.92)  | 0.44)   |        | 243.23)  | 175.18)  | -0.65)  |        | 4.37)  | 2.75)  | -0.95)  |        |
|                  |   |   |   |   | 327.11   | 361.10   | 0.35    |        | 83.12    | 89.28    | 0.29    |        | 1.10   | 1.16   | 0.16    |        |
| Malawi           | — | — | — | — | (318.68, | (354.92, | (0.33,  | <0.001 | (78.75,  | (86.12,  | (0.06,  | 0.014  | (0.64, | (0.82, | (-0.09, | 0.206  |
|                  |   |   |   |   | 335.74)  | 367.37)  | 0.38)   |        | 87.69)   | 92.53)   | 0.53)   |        | 1.78)  | 1.61)  | 0.42)   |        |
|                  |   |   |   |   | 322.99   | 363.72   | 0.41    |        | 81.20    | 73.74    | -0.35   |        | 1.08   | 0.92   | -0.58   |        |
| Malaysia         | — | — | — | — | (317.25, | (359.32, | (0.37,  | <0.001 | (78.29,  | (71.79,  | (-0.92, | 0.234  | (0.76, | (0.72, | (-1.34, | 0.141  |
|                  |   |   |   |   | 328.82)  | 368.16)  | 0.45)   |        | 84.19)   | 75.74)   | 0.23)   |        | 1.48)  | 1.17)  | 0.19)   |        |
|                  |   |   |   |   | 350.22   | 403.24   | 0.48    |        | 117.17   | 91.34    | -0.75   |        | 1.66   | 1.15   | -1.12   |        |
| Maldives         | — | — | — | — | (294.46, | (369.22, | (0.47,  | <0.001 | (84.23,  | (76.07,  | (-1.34, | 0.015  | (0.00, | (0.11, | (-1.82, | 0.002  |
|                  |   |   |   |   | 415.25)  | 440.20)  | 0.50)   |        | 160.30)  | 109.56)  | -0.15)  |        | 17.40) | 6.52)  | -0.42)  |        |
|                  |   |   |   |   | 600.09   | 644.57   | 0.24    |        | 123.21   | 113.69   | -0.27   |        | 1.51   | 1.30   | -0.49   |        |
| Mali             | — | — | — | — | (587.49, | (636.73, | (0.21,  | <0.001 | (117.32, | (110.23, | (-0.52, | 0.034  | (0.91, | (0.95, | (-0.80, | 0.002  |
|                  |   |   |   |   | 612.91)  | 652.49)  | 0.28)   |        | 129.35)  | 117.24)  | -0.02)  |        | 2.37)  | 1.76)  | -0.18)  |        |
|                  |   |   |   |   | 120.28   | 114.41   | -0.18   |        | 21.84    | 19.55    | -0.35   |        | 0.25   | 0.22   | -0.35   |        |
| Malta            | — | — | — | — | (95.70,  | (90.22,  | (-0.19, | <0.001 | (12.29,  | (10.62,  | (-0.95, | 0.255  | (0.00, | (0.00, | (-1.00, | 0.288  |
|                  |   |   |   |   | 149.51)  | 143.89)  | -0.17)  |        | 36.28)   | 34.12)   | 0.25)   |        | 6.66)  | 8.11)  | 0.30)   |        |
|                  |   |   |   |   | 122.99   | 131.68   | 0.23    |        | 114.92   | 110.03   | -0.15   |        | 1.78   | 1.74   | -0.08   |        |
| Marshall Islands | — | — | — | — | (61.86,  | (75.51,  | (0.21,  | <0.001 | (53.98,  | (59.26,  | (-0.24, | <0.001 | (0.00, | (0.00, | (-0.22, | 0.225  |
|                  |   |   |   |   | 224.58)  | 213.79)  | 0.26)   |        | 218.14)  | 187.01)  | -0.07)  |        | 55.85) | 34.62) | 0.05)   |        |
|                  |   |   |   |   | 676.46   | 725.91   | 0.24    |        | 139.17   | 88.55    | -1.53   |        | 1.71   | 0.82   | -2.43   |        |
| Mauritania       | — | — | — | — | (650.59, | (707.16, | (0.17,  | <0.001 | (127.18, | (81.90,  | (-1.62, | <0.001 | (0.62, | (0.29, | (-2.57, | <0.001 |
|                  |   |   |   |   | 703.18)  | 745.07)  | 0.31)   |        | 152.06)  | 95.63)   | -1.44)  |        | 3.86)  | 1.87)  | -2.30)  |        |
|                  |   |   |   |   | 180.35   | 188.49   | 0.15    |        | 77.96    | 51.67    | -1.33   |        | 1.18   | 0.71   | -1.63   |        |
| Mauritius        | — | — | — | — | (164.28, | (171.31, | (0.15,  | <0.001 | (67.46,  | (42.98,  | (-2.06, | <0.001 | (0.24, | (0.07, | (-2.49, | <0.001 |
|                  |   |   |   |   | 197.60)  | 206.97)  | 0.16)   |        | 89.66)   | 61.65)   | -0.60)  |        | 3.54)  | 2.93)  | -0.77)  |        |
|                  |   |   |   |   | 168.59   | 207.67   | 0.71    |        | 41.80    | 40.72    | -0.01   |        | 0.55   | 0.50   | -0.33   |        |
| Mexico           | — | — | — | — | (166.72, | (205.88, | (0.68,  | <0.001 | (40.80,  | (39.93,  | (-0.55, | 0.983  | (0.44, | (0.42, | (-1.04, | 0.364  |

|                   |   |   |   |   |          |          |         |        |         |         |         |        |         |         |         |        |
|-------------------|---|---|---|---|----------|----------|---------|--------|---------|---------|---------|--------|---------|---------|---------|--------|
|                   |   |   |   |   | 170.48)  | 209.47)  | 0.75)   |        | 42.81)  | 41.53)  | 0.55)   |        | 0.68)   | 0.60)   | 0.38)   |        |
| Micronesia        |   |   |   |   | 123.34   | 134.21   | 0.29    |        | 120.93  | 110.38  | -0.31   |        | 1.94    | 1.73    | -0.39   |        |
| (Federated States | — | — | — | — | (80.71,  | (91.02,  | (0.28,  | <0.001 | (76.40, | (70.00, | (-0.36, | <0.001 | (0.00,  | (0.00,  | (-0.50, | <0.001 |
| of)               |   |   |   |   | 182.29)  | 192.56)  | 0.31)   |        | 182.86) | 166.76) | -0.26)  |        | 25.66)  | 23.85)  | -0.27)  |        |
|                   |   |   |   |   | 70.92    | 68.17    | -0.14   |        | 18.48   | 21.62   | 0.54    |        | 0.25    | 0.31    | 0.76    |        |
| Monaco            | — | — | — | — | (15.70,  | (14.75,  | (-0.16, | <0.001 | (0.30,  | (0.59,  | (0.47,  | <0.001 | (0.00,  | (0.00,  | (0.54,  | <0.001 |
|                   |   |   |   |   | 225.30)  | 198.59)  | -0.11)  |        | 147.92) | 124.91) | 0.62)   |        | 120.20) | 86.85)  | 0.99)   |        |
|                   |   |   |   |   | 143.49   | 164.88   | 0.49    |        | 98.23   | 47.48   | -2.48   |        | 1.51    | 0.65    | -2.88   |        |
| Mongolia          | — | — | — | — | (132.96, | (154.77, | (0.47,  | <0.001 | (88.87, | (42.42, | (-3.09, | <0.001 | (0.55,  | (0.20,  | (-3.59, | <0.001 |
|                   |   |   |   |   | 154.78)  | 175.50)  | 0.51)   |        | 108.43) | 53.03)  | -1.86)  |        | 3.48)   | 1.69)   | -2.16)  |        |
|                   |   |   |   |   | 126.22   | 124.20   | -0.06   |        | 44.09   | 25.35   | -2.49   |        | 0.64    | 0.32    | -3.09   |        |
| Montenegro        | — | — | — | — | (107.56, | (103.72, | (-0.07, | <0.001 | (33.45, | (16.83, | (-4.33, | 0.009  | (0.01,  | (0.00,  | (-5.22, | 0.005  |
|                   |   |   |   |   | 147.23)  | 147.63)  | -0.04)  |        | 57.11)  | 36.86)  | -0.62)  |        | 4.18)   | 4.41)   | -0.92)  |        |
|                   |   |   |   |   | 369.53   | 411.90   | 0.37    |        | 80.36   | 70.05   | -0.44   |        | 1.02    | 0.80    | -0.79   |        |
| Morocco           | — | — | — | — | (364.29, | (407.26, | (0.37,  | <0.001 | (77.86, | (68.14, | (-0.87, | 0.051  | (0.75,  | (0.60,  | (-1.32, | 0.004  |
|                   |   |   |   |   | 374.83)  | 416.57)  | 0.38)   |        | 82.93)  | 71.99)  | 0.00)   |        | 1.36)   | 1.03)   | -0.26)  |        |
|                   |   |   |   |   | 298.09   | 348.19   | 0.54    |        | 70.82   | 95.34   | 1.06    |        | 0.94    | 1.30    | 1.17    |        |
| Mozambique        | — | — | — | — | (290.62, | (343.07, | (0.51,  | <0.001 | (67.08, | (92.56, | (0.95,  | <0.001 | (0.55,  | (0.99,  | (1.01,  | <0.001 |
|                   |   |   |   |   | 305.73)  | 353.36)  | 0.57)   |        | 74.71)  | 98.19)  | 1.16)   |        | 1.50)   | 1.69)   | 1.32)   |        |
|                   |   |   |   |   | 130.45   | 153.56   | 0.56    |        | 66.54   | 51.43   | -0.87   |        | 0.99    | 0.71    | -1.14   |        |
| Myanmar           | — | — | — | — | (128.04, | (151.23, | (0.55,  | <0.001 | (64.77, | (50.08, | (-1.04, | <0.001 | (0.79,  | (0.56,  | (-1.38, | <0.001 |
|                   |   |   |   |   | 132.90)  | 155.92)  | 0.57)   |        | 68.34)  | 52.81)  | -0.70)  |        | 1.24)   | 0.89)   | -0.90)  |        |
|                   |   |   |   |   | 230.37   | 248.82   | 0.27    |        | 49.29   | 47.59   | -0.11   |        | 0.63    | 0.58    | -0.24   |        |
| Namibia           | — | — | — | — | (212.86, | (235.29, | (0.22,  | <0.001 | (40.86, | (41.64, | (-0.32, | 0.269  | (0.04,  | (0.11,  | (-0.65, | 0.262  |
|                   |   |   |   |   | 249.15)  | 262.97)  | 0.32)   |        | 59.10)  | 54.20)  | 0.09)   |        | 3.04)   | 1.85)   | 0.18)   |        |
|                   |   |   |   |   | 135.84   | 145.86   | 0.24    |        | 130.32  | 124.09  | -0.19   |        | 2.07    | 1.95    | -0.23   |        |
| Nauru             | — | — | — | — | (26.58,  | (35.41,  | (0.22,  | <0.001 | (22.47, | (23.47, | (-0.26, | <0.001 | (0.00,  | (0.00,  | (-0.30, | <0.001 |
|                   |   |   |   |   | 426.55)  | 415.68)  | 0.27)   |        | 424.26) | 390.29) | -0.11)  |        | 211.60) | 190.47) | -0.15)  |        |
|                   |   |   |   |   | 70.08    | 76.49    | 0.30    |        | 36.62   | 33.14   | -0.34   |        | 0.57    | 0.49    | -0.51   |        |
| Nepal             | — | — | — | — | (67.35,  | (74.27,  | (0.27,  | <0.001 | (34.57, | (31.64, | (-0.46, | <0.001 | (0.34,  | (0.32,  | (-0.66, | <0.001 |
|                   |   |   |   |   | 72.90)   | 78.76)   | 0.32)   |        | 38.76)  | 34.70)  | -0.22)  |        | 0.90)   | 0.72)   | -0.36)  |        |
|                   |   |   |   |   | 123.47   | 134.57   | 0.30    |        | 22.70   | 19.80   | -0.48   |        | 0.27    | 0.21    | -0.83   |        |
| Netherlands       | — | — | — | — | (119.60, | (130.21, | (0.28,  | <0.001 | (21.06, | (18.16, | (-0.78, | 0.002  | (0.12,  | (0.08,  | (-1.06, | <0.001 |

|                          |   |   |   |   |          |          |         |        |          |          |         |        |         |         |         |        |
|--------------------------|---|---|---|---|----------|----------|---------|--------|----------|----------|---------|--------|---------|---------|---------|--------|
|                          |   |   |   |   | 127.45)  | 139.04)  | 0.31)   |        | 24.44)   | 21.55)   | -0.17)  |        | 0.53)   | 0.48)   | -0.59)  |        |
|                          |   |   |   |   | 66.73    | 50.26    | -0.97   |        | 20.53    | 14.31    | -1.23   |        | 0.28    | 0.20    | -1.14   |        |
| New Zealand              | — | — | — | — | (60.77,  | (45.13,  | (-1.12, | <0.001 | (17.29,  | (11.64,  | (-1.41, | <0.001 | (0.03,  | (0.01,  | (-1.39, | <0.001 |
|                          |   |   |   |   | 73.11)   | 55.82)   | -0.82)  |        | 24.21)   | 17.42)   | -1.05)  |        | 1.04)   | 0.90)   | -0.89)  |        |
|                          |   |   |   |   | 117.70   | 150.71   | 0.85    |        | 23.50    | 25.19    | 0.08    |        | 0.29    | 0.27    | -0.47   |        |
| Nicaragua                | — | — | — | — | (110.05, | (144.41, | (0.81,  | <0.001 | (19.93,  | (22.64,  | (-0.41, | 0.752  | (0.03,  | (0.07,  | (-1.10, | 0.146  |
|                          |   |   |   |   | 125.82)  | 157.21)  | 0.90)   |        | 27.58)   | 27.96)   | 0.57)   |        | 1.22)   | 0.73)   | 0.17)   |        |
|                          |   |   |   |   | 704.45   | 783.77   | 0.37    |        | 136.28   | 122.99   | -0.33   |        | 1.63    | 1.34    | -0.65   |        |
| Niger                    | — | — | — | — | (690.43, | (775.16, | (0.36,  | <0.001 | (129.92, | (119.41, | (-0.52, | 0.001  | (0.99,  | (0.98,  | (-0.94, | <0.001 |
|                          |   |   |   |   | 718.71)  | 792.46)  | 0.39)   |        | 142.89)  | 126.65)  | -0.14)  |        | 2.56)   | 1.81)   | -0.35)  |        |
|                          |   |   |   |   | 901.55   | 1029.98  | 0.46    |        | 146.58   | 123.29   | -0.59   |        | 1.64    | 1.13    | -1.26   |        |
| Nigeria                  | — | — | — | — | (897.08, | (1026.86 | (0.44,  | <0.001 | (144.73, | (122.17, | (-0.73, | <0.001 | (1.45,  | (1.02,  | (-1.38, | <0.001 |
|                          |   |   |   |   | 906.03)  | 1033.12) | 0.48)   |        | 148.44)  | 124.41)  | -0.45)  |        | 1.85)   | 1.25)   | -1.14)  |        |
|                          |   |   |   |   | 161.33   | 176.64   | 0.31    |        | 92.40    | 67.34    | -1.10   |        | 1.41    | 0.95    | -1.39   |        |
| Niue                     | — | — | — | — | (1.20,   | (0.24,   | (0.31,  | <0.001 | (0.01,   | (0.00,   | (-1.28, | <0.001 | (0.00,  | (0.00,  | (-1.63, | <0.001 |
|                          |   |   |   |   | 1306.49) | 1782.24) | 0.32)   |        | 1202.94) | 1593.47) | -0.92)  |        | 1034.03 | 1468.82 | -1.14)  |        |
|                          |   |   |   |   | 136.74   | 141.69   | 0.12    |        | 31.80    | 27.61    | -0.45   |        | 0.41    | 0.33    | -0.63   |        |
| North Macedonia          | — | — | — | — | (125.70, | (129.63, | (0.11,  | <0.001 | (26.62,  | (22.65,  | (-0.90, | 0.054  | (0.04,  | (0.02,  | (-1.56, | 0.187  |
|                          |   |   |   |   | 148.50)  | 154.65)  | 0.14)   |        | 37.71)   | 33.45)   | 0.01)   |        | 1.64)   | 1.80)   | 0.31)   |        |
|                          |   |   |   |   | 196.57   | 213.90   | 0.30    |        | 53.64    | 56.86    | 0.17    |        | 0.73    | 0.77    | 0.11    |        |
| Northern Mariana Islands | — | — | — | — | (120.27, | (124.42, | (0.26,  | <0.001 | (20.24,  | (14.84,  | (-0.25, | 0.428  | (0.00,  | (0.00,  | (-0.41, | 0.673  |
|                          |   |   |   |   | 306.13)  | 358.07)  | 0.33)   |        | 121.14)  | 163.97)  | 0.58)   |        | 44.37)  | 81.07)  | 0.65)   |        |
|                          |   |   |   |   | 145.31   | 142.49   | -0.07   |        | 30.67    | 17.00    | -2.02   |        | 0.39    | 0.16    | -3.01   |        |
| Norway                   | — | — | — | — | (137.18, | (134.83, | (-0.11, | <0.001 | (27.02,  | (14.46,  | (-2.31, | <0.001 | (0.09,  | (0.01,  | (-3.63, | <0.001 |
|                          |   |   |   |   | 153.82)  | 150.50)  | -0.04)  |        | 34.70)   | 19.90)   | -1.73)  |        | 1.13)   | 0.75)   | -2.39)  |        |
|                          |   |   |   |   | 401.99   | 469.88   | 0.54    |        | 86.83    | 61.53    | -1.15   |        | 1.07    | 0.58    | -2.07   |        |
| Oman                     | — | — | — | — | (384.32, | (456.99, | (0.52,  | <0.001 | (78.83,  | (57.06,  | (-1.40, | <0.001 | (0.37,  | (0.24,  | (-2.41, | <0.001 |
|                          |   |   |   |   | 420.31)  | 483.13)  | 0.56)   |        | 95.46)   | 66.34)   | -0.90)  |        | 2.53)   | 1.37)   | -1.74)  |        |
|                          |   |   |   |   | 83.30    | 88.84    | 0.22    |        | 46.41    | 66.26    | 1.26    |        | 0.72    | 1.04    | 1.29    |        |
| Pakistan                 | — | — | — | — | (82.08,  | (87.98,  | (0.20,  | <0.001 | (45.44,  | (65.49,  | (1.11,  | <0.001 | (0.60,  | (0.95,  | (1.17,  | <0.001 |
|                          |   |   |   |   | 84.54)   | 89.70)   | 0.24)   |        | 47.40)   | 67.03)   | 1.41)   |        | 0.86)   | 1.15)   | 1.41)   |        |

|                  |   |   |   |   |          |          |         |        |         |         |         |        |         |         |         |        |
|------------------|---|---|---|---|----------|----------|---------|--------|---------|---------|---------|--------|---------|---------|---------|--------|
|                  |   |   |   |   | 450.95   | 484.46   | 0.25    |        | 161.53  | 145.83  | -0.35   |        | 2.30    | 2.01    | -0.47   |        |
| Palau            | — | — | — | — | (261.88, | (273.98, | (0.23,  | <0.001 | (58.03, | (48.56, | (-0.52, | <0.001 | (0.00,  | (0.00,  | (-0.59, | <0.001 |
|                  |   |   |   |   | 730.47)  | 799.44)  | 0.26)   |        | 362.35) | 350.40) | -0.19)  |        | 119.37) | 134.08) | -0.34)  |        |
|                  |   |   |   |   | 237.25   | 253.74   | 0.23    |        | 51.51   | 38.19   | -1.06   |        | 0.64    | 0.40    | -1.69   |        |
| Palestine        | — | — | — | — | (222.10, | (244.32, | (0.22,  | <0.001 | (44.35, | (34.53, | (-1.42, | <0.001 | (0.09,  | (0.11,  | (-2.18, | <0.001 |
|                  |   |   |   |   | 253.35)  | 263.47)  | 0.24)   |        | 59.69)  | 42.17)  | -0.70)  |        | 2.55)   | 1.09)   | -1.19)  |        |
|                  |   |   |   |   | 87.13    | 111.50   | 0.85    |        | 30.15   | 30.63   | 0.08    |        | 0.43    | 0.42    | 0.05    |        |
| Panama           | — | — | — | — | (79.32,  | (104.36, | (0.82,  | <0.001 | (25.44, | (26.92, | (-0.94, | 0.880  | (0.05,  | (0.10,  | (-1.55, | 0.954  |
|                  |   |   |   |   | 95.56)   | 119.02)  | 0.89)   |        | 35.52)  | 34.71)  | 1.10)   |        | 1.63)   | 1.17)   | 1.67)   |        |
|                  |   |   |   |   | 87.82    | 98.44    | 0.40    |        | 58.71   | 63.59   | 0.23    |        | 0.91    | 0.97    | 0.15    |        |
| Papua New Guinea | — | — | — | — | (81.72,  | (94.28,  | (0.38,  | <0.001 | (53.50, | (60.17, | (0.03,  | 0.028  | (0.37,  | (0.59,  | (-0.04, | 0.120  |
|                  |   |   |   |   | 94.29)   | 102.74)  | 0.43)   |        | 64.33)  | 67.16)  | 0.44)   |        | 1.92)   | 1.52)   | 0.35)   |        |
|                  |   |   |   |   | 153.63   | 187.19   | 0.68    |        | 34.19   | 34.20   | 0.10    |        | 0.43    | 0.40    | -0.08   |        |
| Paraguay         | — | — | — | — | (145.37, | (180.40, | (0.64,  | <0.001 | (30.19, | (31.31, | (-0.66, | 0.790  | (0.10,  | (0.15,  | (-1.31, | 0.896  |
|                  |   |   |   |   | 162.28)  | 194.17)  | 0.72)   |        | 38.59)  | 37.28)  | 0.87)   |        | 1.26)   | 0.88)   | 1.16)   |        |
|                  |   |   |   |   | 314.27   | 416.86   | 0.98    |        | 96.25   | 58.91   | -1.60   |        | 1.30    | 0.60    | -2.56   |        |
| Peru             | — | — | — | — | (309.19, | (412.06, | (0.96,  | <0.001 | (93.33, | (57.12, | (-2.06, | <0.001 | (0.97,  | (0.43,  | (-3.19, | <0.001 |
|                  |   |   |   |   | 319.43)  | 421.69)  | 1.00)   |        | 99.24)  | 60.75)  | -1.13)  |        | 1.70)   | 0.81)   | -1.94)  |        |
|                  |   |   |   |   | 110.00   | 111.54   | 0.05    |        | 17.79   | 39.66   | 2.86    |        | 0.20    | 0.56    | 3.66    |        |
| Philippines      | — | — | — | — | (108.23, | (110.21, | (0.03,  | <0.001 | (17.06, | (38.85, | (2.50,  | <0.001 | (0.13,  | (0.47,  | (3.13,  | <0.001 |
|                  |   |   |   |   | 111.79)  | 112.88)  | 0.07)   |        | 18.54)  | 40.48)  | 3.22)   |        | 0.30)   | 0.67)   | 4.18)   |        |
|                  |   |   |   |   | 304.21   | 317.45   | 0.15    |        | 98.72   | 42.50   | -2.93   |        | 1.44    | 0.44    | -4.09   |        |
| Poland           | — | — | — | — | (300.10, | (312.75, | (0.13,  | <0.001 | (96.51, | (40.91, | (-3.37, | <0.001 | (1.18,  | (0.30,  | (-4.66, | <0.001 |
|                  |   |   |   |   | 308.36)  | 322.21)  | 0.17)   |        | 100.98) | 44.14)  | -2.49)  |        | 1.73)   | 0.64)   | -3.51)  |        |
|                  |   |   |   |   | 194.81   | 197.51   | 0.01    |        | 53.10   | 27.44   | -2.28   |        | 0.72    | 0.29    | -3.16   |        |
| Portugal         | — | — | — | — | (188.56, | (190.35, | (-0.05, | 0.694  | (49.84, | (24.88, | (-2.91, | <0.001 | (0.39,  | (0.09,  | (-4.11, | <0.001 |
|                  |   |   |   |   | 201.21)  | 204.87)  | 0.07)   |        | 56.51)  | 30.20)  | -1.64)  |        | 1.23)   | 0.72)   | -2.21)  |        |
|                  |   |   |   |   | 148.80   | 155.15   | 0.15    |        | 68.99   | 37.39   | -2.01   |        | 1.06    | 0.50    | -2.45   |        |
| Puerto Rico      | — | — | — | — | (139.90, | (144.87, | (0.13,  | <0.001 | (62.80, | (32.48, | (-2.80, | <0.001 | (0.42,  | (0.10,  | (-3.38, | <0.001 |
|                  |   |   |   |   | 158.14)  | 165.96)  | 0.17)   |        | 75.63)  | 42.85)  | -1.22)  |        | 2.20)   | 1.53)   | -1.52)  |        |
|                  |   |   |   |   | 332.00   | 354.00   | 0.22    |        | 52.26   | 36.89   | -1.18   |        | 0.57    | 0.30    | -2.20   |        |
| Qatar            | — | — | — | — | (302.68, | (341.21, | (0.20,  | <0.001 | (41.19, | (32.95, | (-1.46, | <0.001 | (0.01,  | (0.06,  | (-2.68, | <0.001 |
|                  |   |   |   |   | 364.19)  | 367.39)  | 0.24)   |        | 66.35)  | 41.45)  | -0.90)  |        | 5.87)   | 1.57)   | -1.72)  |        |

|                    |   |   |   |   |          |           |         |        |          |          |         |        |        |        |         |        |
|--------------------|---|---|---|---|----------|-----------|---------|--------|----------|----------|---------|--------|--------|--------|---------|--------|
|                    |   |   |   |   | 164.64   | 160.83    | -0.09   |        | 43.17    | 16.90    | -3.18   |        | 0.58   | 0.14   | -4.75   |        |
| Republic of Korea  | — | — | — | — | (162.21, | (158.22,  | (-0.13, | <0.001 | (41.93,  | (16.07,  | (-3.43, | <0.001 | (0.44, | (0.08, | (-5.21, | <0.001 |
|                    |   |   |   |   | 167.10)  | 163.48)   | -0.05)  |        | 44.45)   | 17.76)   | -2.93)  |        | 0.74)  | 0.24)  | -4.29)  |        |
| Republic of        |   |   |   |   | 80.79    | 92.30     | 0.46    |        | 39.28    | 23.70    | -1.89   |        | 0.59   | 0.32   | -2.21   |        |
| Moldova            | — | — | — | — | (74.76,  | (84.53,   | (0.41,  | <0.001 | (35.22,  | (20.15,  | (-2.69, | <0.001 | (0.20, | (0.05, | (-3.26, | <0.001 |
|                    |   |   |   |   | 87.19)   | 100.64)   | 0.52)   |        | 43.72)   | 27.77)   | -1.08)  |        | 1.41)  | 1.27)  | -1.15)  |        |
| Romania            | — | — | — | — | 133.34   | 137.59    | 0.11    |        | 57.28    | 32.89    | -1.84   |        | 0.88   | 0.44   | -2.28   |        |
|                    |   |   |   |   | (129.89, | (133.16,  | (0.10,  | <0.001 | (55.08,  | (30.86,  | (-2.52, | <0.001 | (0.63, | (0.24, | (-3.01, | <0.001 |
|                    |   |   |   |   | 136.86)  | 142.13)   | 0.12)   |        | 59.57)   | 35.02)   | -1.15)  |        | 1.21)  | 0.76)  | -1.54)  |        |
| Russian Federation | — | — | — | — | 82.10    | 88.59     | 0.27    |        | 47.55    | 71.81    | 1.54    |        | 0.73   | 1.17   | 1.79    |        |
|                    |   |   |   |   | (81.01,  | (87.27,   | (0.25,  | <0.001 | (46.78,  | (70.79,  | (-0.64, | 0.168  | (0.64, | (1.05, | (-0.56, | 0.136  |
|                    |   |   |   |   | 83.20)   | 89.92)    | 0.28)   |        | 48.34)   | 72.85)   | 3.76)   |        | 0.84)  | 1.31)  | 4.18)   |        |
|                    |   |   |   |   | 304.74   | 342.14    | 0.41    |        | 128.51   | 81.67    | -1.55   |        | 1.89   | 1.06   | -1.98   |        |
| Rwanda             | — | — | — | — | (295.47, | (335.15,  | (0.33,  | <0.001 | (122.33, | (78.21,  | (-1.68, | <0.001 | (1.20, | (0.70, | (-2.12, | <0.001 |
|                    |   |   |   |   | 314.24)  | 349.24)   | 0.48)   |        | 134.94)  | 85.24)   | -1.42)  |        | 2.85)  | 1.55)  | -1.83)  |        |
| Saint Kitts and    |   |   |   |   | 187.11   | 201.70    | 0.26    |        | 97.59    | 53.46    | -1.73   |        | 1.54   | 0.71   | -2.13   |        |
| Nevis              | — | — | — | — | (107.86, | (126.51,  | (0.24,  | <0.001 | (41.58,  | (19.74,  | (-2.80, | 0.002  | (0.00, | (0.00, | (-3.67, | 0.008  |
|                    |   |   |   |   | 306.38)  | 306.30)   | 0.27)   |        | 196.95)  | 118.02)  | -0.65)  |        | 55.28) | 37.87) | -0.56)  |        |
| Saint Lucia        | — | — | — | — | 276.95   | 292.20    | 0.19    |        | 134.35   | 105.64   | -0.75   |        | 2.08   | 1.54   | -0.95   |        |
|                    |   |   |   |   | (218.53, | (237.28,  | (0.18,  | <0.001 | (91.72,  | (74.09,  | (-1.61, | 0.090  | (0.00, | (0.00, | (-2.00, | 0.076  |
|                    |   |   |   |   | 348.32)  | 356.29)   | 0.20)   |        | 191.40)  | 146.46)  | 0.12)   |        | 23.09) | 14.64) | 0.10)   |        |
| Saint Vincent and  |   |   |   |   | 437.41   | 468.70    | 0.24    |        | 162.11   | 142.11   | -0.34   |        | 2.39   | 2.00   | -0.47   |        |
| the Grenadines     | — | — | — | — | (357.47, | (381.41,  | (0.22,  | <0.001 | (111.73, | (95.96,  | (-1.07, | 0.358  | (0.00, | (0.00, | (-1.38, | 0.320  |
|                    |   |   |   |   | 532.59)  | 570.36)   | 0.26)   |        | 229.49)  | 203.12)  | 0.39)   |        | 27.56) | 22.26) | 0.46)   |        |
| Samoa              | — | — | — | — | 148.71   | 160.12    | 0.26    |        | 68.96    | 70.07    | 0.06    |        | 1.02   | 1.03   | 0.05    |        |
|                    |   |   |   |   | (112.21, | (125.30,  | (0.24,  | <0.001 | (42.89,  | (46.58,  | (0.02,  | 0.008  | (0.00, | (0.00, | (-0.05, | 0.361  |
|                    |   |   |   |   | 195.86)  | 202.64)   | 0.27)   |        | 107.04)  | 101.98)  | 0.10)   |        | 18.47) | 12.99) | 0.15)   |        |
|                    |   |   |   |   | 395.22   | 387.11    | -0.08   |        | 68.36    | 61.64    | -0.36   |        | 0.81   | 0.70   | -0.47   |        |
| San Marino         | — | — | — | — | (234.50, | (233.23,  | (-0.10, | <0.001 | (14.65,  | (13.03,  | (-0.46, | <0.001 | (0.00, | (0.00, | (-0.61, | <0.001 |
|                    |   |   |   |   | 626.16)  | 605.56)   | -0.06)  |        | 199.15)  | 180.71)  | -0.26)  |        | 87.40) | 79.73) | -0.33)  |        |
| Sao Tome and       |   |   |   |   | 1038.27  | 1203.99   | 0.51    |        | 154.18   | 181.50   | 0.57    |        | 1.68   | 1.90   | 0.48    |        |
| Principe           | — | — | — | — | (906.85, | (1104.42, | (0.50,  | <0.001 | (102.21, | (143.64, | (0.24,  | 0.001  | (0.00, | (0.02, | (-0.05, | 0.075  |
|                    |   |   |   |   | 1187.51) | ,         | 0.53)   |        | 227.04)  | 226.71)  | 0.91)   |        | 32.77) | 13.16) | 1.01)   |        |





|                            |   |   |   |   |          |          |         |        |          |         |         |        |        |        |         |        |
|----------------------------|---|---|---|---|----------|----------|---------|--------|----------|---------|---------|--------|--------|--------|---------|--------|
|                            |   |   |   |   | 230.22)  | 238.77)  | 0.18)   |        | 58.56)   | 44.76)  | -0.39)  |        | 1.02)  | 0.68)  | -0.51)  |        |
|                            |   |   |   |   | 351.45   | 373.36   | 0.21    |        | 76.68    | 61.93   | -0.67   |        | 0.98   | 0.70   | -1.04   |        |
| South Sudan                | — | — | — | — | (340.94, | (363.72, | (0.19,  | <0.001 | (71.56,  | (57.89, | (-1.00, | <0.001 | (0.47, | (0.33, | (-1.50, | <0.001 |
|                            |   |   |   |   | 362.25)  | 383.22)  | 0.23)   |        | 82.10)   | 66.20)  | -0.33)  |        | 1.85)  | 1.35)  | -0.57)  |        |
|                            |   |   |   |   | 159.55   | 169.68   | 0.21    |        | 54.50    | 27.19   | -2.52   |        | 0.77   | 0.31   | -3.31   |        |
| Spain                      | — | — | — | — | (156.71, | (166.40, | (0.18,  | <0.001 | (52.83,  | (25.94, | (-2.82, | <0.001 | (0.58, | (0.19, | (-3.82, | <0.001 |
|                            |   |   |   |   | 162.42)  | 173.00)  | 0.23)   |        | 56.20)   | 28.49)  | -2.21)  |        | 1.00)  | 0.47)  | -2.80)  |        |
|                            |   |   |   |   | 122.79   | 131.48   | 0.23    |        | 123.57   | 51.02   | -2.91   |        | 1.99   | 0.74   | -3.25   |        |
| Sri Lanka                  | — | — | — | — | (119.25, | (127.90, | (0.20,  | <0.001 | (119.97, | (48.82, | (-4.38, | <0.001 | (1.55, | (0.50, | (-4.87, | <0.001 |
|                            |   |   |   |   | 126.41)  | 135.13)  | 0.26)   |        | 127.25)  | 53.31)  | -1.41)  |        | 2.51)  | 1.07)  | -1.60)  |        |
|                            |   |   |   |   | 324.09   | 362.97   | 0.39    |        | 99.53    | 97.24   | -0.11   |        | 1.39   | 1.30   | -0.26   |        |
| Sudan                      | — | — | — | — | (318.30, | (358.94, | (0.37,  | <0.001 | (96.18,  | (95.08, | (-0.22, | 0.048  | (1.02, | (1.06, | (-0.40, | <0.001 |
|                            |   |   |   |   | 329.96)  | 367.04)  | 0.40)   |        | 102.97)  | 99.44)  | -0.00)  |        | 1.87)  | 1.59)  | -0.12)  |        |
|                            |   |   |   |   | 133.07   | 148.43   | 0.38    |        | 59.34    | 55.29   | -0.21   |        | 0.89   | 0.81   | -0.31   |        |
| Suriname                   | — | — | — | — | (109.99, | (126.20, | (0.36,  | <0.001 | (43.16,  | (42.07, | (-1.68, | 0.779  | (0.00, | (0.01, | (-2.16, | 0.742  |
|                            |   |   |   |   | 160.37)  | 173.51)  | 0.40)   |        | 80.21)   | 71.43)  | 1.28)   |        | 8.12)  | 5.16)  | 1.57)   |        |
|                            |   |   |   |   | 204.60   | 104.41   | -2.10   |        | 37.64    | 16.88   | -2.68   |        | 0.45   | 0.19   | -2.94   |        |
| Sweden                     | — | — | — | — | (197.38, | (99.52,  | (-2.28, | <0.001 | (34.61,  | (14.97, | (-2.97, | <0.001 | (0.18, | (0.04, | (-3.57, | <0.001 |
|                            |   |   |   |   | 212.03)  | 109.49)  | -1.93)  |        | 40.88)   | 18.98)  | -2.39)  |        | 0.95)  | 0.57)  | -2.32)  |        |
|                            |   |   |   |   | 131.04   | 122.72   | -0.22   |        | 28.47    | 16.85   | -1.80   |        | 0.36   | 0.17   | -2.72   |        |
| Switzerland                | — | — | — | — | (125.05, | (116.97, | (-0.28, | <0.001 | (25.74,  | (14.80, | (-2.40, | <0.001 | (0.12, | (0.03, | (-3.54, | <0.001 |
|                            |   |   |   |   | 137.27)  | 128.71)  | -0.17)  |        | 31.45)   | 19.13)  | -1.18)  |        | 0.90)  | 0.62)  | -1.90)  |        |
|                            |   |   |   |   | 320.86   | 365.87   | 0.46    |        | 126.62   | 68.88   | -2.11   |        | 1.83   | 0.82   | -2.78   |        |
| Syrian Arab Republic       | — | — | — | — | (313.63, | (357.71, | (0.44,  | <0.001 | (121.92, | (65.27, | (-2.30, | <0.001 | (1.30, | (0.47, | (-3.05, | <0.001 |
|                            |   |   |   |   | 328.24)  | 374.20)  | 0.49)   |        | 131.47)  | 72.66)  | -1.91)  |        | 2.53)  | 1.39)  | -2.51)  |        |
|                            |   |   |   |   | 162.10   | 168.07   | 0.11    |        | 34.31    | 25.69   | -1.00   |        | 0.44   | 0.29   | -1.48   |        |
| Taiwan (Province of China) | — | — | — | — | (158.48, | (164.13, | (0.06,  | <0.001 | (32.66,  | (24.18, | (-1.55, | <0.001 | (0.27, | (0.15, | (-2.17, | <0.001 |
|                            |   |   |   |   | 165.79)  | 172.09)  | 0.17)   |        | 36.02)   | 27.27)  | -0.45)  |        | 0.67)  | 0.51)  | -0.78)  |        |
|                            |   |   |   |   | 75.58    | 80.35    | 0.21    |        | 38.75    | 38.58   | -0.02   |        | 0.59   | 0.59   | -0.04   |        |
| Tajikistan                 | — | — | — | — | (70.36,  | (76.55,  | (0.19,  | <0.001 | (34.86,  | (35.91, | (-0.47, | 0.946  | (0.20, | (0.30, | (-0.56, | 0.894  |
|                            |   |   |   |   | 81.13)   | 84.30)   | 0.23)   |        | 42.98)   | 41.40)  | 0.44)   |        | 1.41)  | 1.05)  | 0.49)   |        |
|                            |   |   |   |   | 202.13   | 222.50   | 0.33    |        | 44.89    | 46.89   | 0.24    |        | 0.58   | 0.59   | 0.15    |        |
| Thailand                   | — | — | — | — | (199.68, | (219.81, | (0.32,  | <0.001 | (43.72,  | (45.68, | (-0.37, | 0.445  | (0.45, | (0.46, | (-0.63, | 0.705  |

|                     |   |   |   |   |          |          |         |        |          |          |         |        |          |          |         |        |
|---------------------|---|---|---|---|----------|----------|---------|--------|----------|----------|---------|--------|----------|----------|---------|--------|
|                     |   |   |   |   | 204.59)  | 225.21)  | 0.34)   |        | 46.08)   | 48.12)   | 0.85)   |        | 0.73)    | 0.74)    | 0.93)   |        |
|                     |   |   |   |   | 112.36)  | 140.73)  | 0.77)   |        | 29.54)   | 37.30)   | 0.85)   |        | 0.40)    | 0.49)    | 0.72)   |        |
| Timor-Leste         | — | — | — | — | (96.76,  | (126.61, | (0.74,  | <0.001 | (21.63,  | (29.97,  | (-0.01, | 0.052  | (0.00,   | (0.02,   | (-0.42, | 0.218  |
|                     |   |   |   |   | 129.97)  | 156.22)  | 0.81)   |        | 39.59)   | 46.09)   | 1.72)   |        | 3.59)    | 2.96)    | 1.87)   |        |
|                     |   |   |   |   | 743.04)  | 794.29)  | 0.23)   |        | 145.78)  | 140.04)  | -0.11)  |        | 1.76)    | 1.61)    | -0.27)  |        |
| Togo                | — | — | — | — | (722.63, | (780.48, | (0.19,  | <0.001 | (136.31, | (134.06, | (-0.27, | 0.174  | (0.84,   | (1.02,   | (-0.45, | 0.003  |
|                     |   |   |   |   | 763.97)  | 808.30)  | 0.28)   |        | 155.82)  | 146.22)  | 0.05)   |        | 3.33)    | 2.45)    | -0.09)  |        |
|                     |   |   |   |   | 157.95)  | 174.07)  | 0.34)   |        | 66.25)   | 59.44)   | -0.37)  |        | 0.97)    | 0.84)    | -0.52)  |        |
| Tokelau             | — | — | — | — | (0.14,   | (0.09,   | (0.32,  | <0.001 | (0.00,   | (0.00,   | (-0.40, | <0.001 | (0.00,   | (0.00,   | (-0.61, | <0.001 |
|                     |   |   |   |   | 1846.85) | 2097.02) | 0.36)   |        | 1704.34) | 1906.72) | -0.34)  |        | 1585.64) | 1801.37) | -0.43)  |        |
|                     |   |   |   |   | 254.43)  | 271.37)  | 0.23)   |        | 53.25)   | 60.59)   | 0.46)   |        | 0.67)    | 0.76)    | 0.49)   |        |
| Tonga               | — | — | — | — | (188.73, | (204.17, | (0.17,  | <0.001 | (23.65,  | (30.39,  | (0.33,  | <0.001 | (0.00,   | (0.00,   | (0.32,  | <0.001 |
|                     |   |   |   |   | 341.47)  | 355.83)  | 0.30)   |        | 108.65)  | 110.11)  | 0.59)   |        | 35.28)   | 25.91)   | 0.65)   |        |
|                     |   |   |   |   | 162.21)  | 174.08)  | 0.24)   |        | 53.61)   | 82.46)   | 1.69)   |        | 0.77)    | 1.25)    | 1.93)   |        |
| Trinidad and Tobago | — | — | — | — | (146.96, | (157.83, | (0.23,  | <0.001 | (44.87,  | (71.94,  | (0.84,  | <0.001 | (0.08,   | (0.30,   | (0.97,  | <0.001 |
|                     |   |   |   |   | 178.67)  | 191.62)  | 0.26)   |        | 63.61)   | 94.20)   | 2.55)   |        | 2.98)    | 3.69)    | 2.89)   |        |
|                     |   |   |   |   | 375.01)  | 417.88)  | 0.37)   |        | 59.67)   | 65.81)   | 0.33)   |        | 0.66)    | 0.73)    | 0.33)   |        |
| Tunisia             | — | — | — | — | (365.89, | (409.22, | (0.36,  | <0.001 | (55.98,  | (62.46,  | (0.21,  | <0.001 | (0.32,   | (0.42,   | (0.11,  | 0.004  |
|                     |   |   |   |   | 384.32)  | 426.68)  | 0.39)   |        | 63.56)   | 69.30)   | 0.44)   |        | 1.23)    | 1.19)    | 0.55)   |        |
|                     |   |   |   |   | 450.20)  | 442.76)  | -0.07)  |        | 106.97)  | 54.37)   | -2.38)  |        | 1.40)    | 0.51)    | -3.43)  |        |
| Turkey              | — | — | — | — | (446.45, | (439.64, | (-0.12, | 0.001  | (105.12, | (53.29,  | (-2.74, | <0.001 | (1.20,   | (0.41,   | (-3.97, | <0.001 |
|                     |   |   |   |   | 453.98)  | 445.89)  | -0.03)  |        | 108.85)  | 55.47)   | -2.02)  |        | 1.64)    | 0.62)    | -2.88)  |        |
|                     |   |   |   |   | 61.13)   | 68.14)   | 0.38)   |        | 89.24)   | 84.84)   | -0.26)  |        | 1.46)    | 1.36)    | -0.34)  |        |
| Turkmenistan        | — | — | — | — | (55.81,  | (63.25,  | (0.37,  | <0.001 | (82.40,  | (79.47,  | (-0.77, | 0.313  | (0.70,   | (0.76,   | (-0.87, | 0.209  |
|                     |   |   |   |   | 66.88)   | 73.32)   | 0.39)   |        | 96.53)   | 90.50)   | 0.25)   |        | 2.74)    | 2.26)    | 0.19)   |        |
|                     |   |   |   |   | 135.61)  | 150.21)  | 0.35)   |        | 97.41)   | 94.06)   | -0.13)  |        | 1.52)    | 1.45)    | -0.17)  |        |
| Tuvalu              | — | — | — | — | (20.93,  | (40.64,  | (0.34,  | <0.001 | (8.15,   | (14.44,  | (-0.19, | <0.001 | (0.00,   | (0.00,   | (-0.26, | <0.001 |
|                     |   |   |   |   | 470.01)  | 400.85)  | 0.36)   |        | 415.07)  | 322.52)  | -0.06)  |        | 249.46)  | 168.17)  | -0.09)  |        |
|                     |   |   |   |   | 368.90)  | 391.79)  | 0.21)   |        | 84.29)   | 88.26)   | 0.11)   |        | 1.09)    | 1.12)    | 0.04)   |        |
| Uganda              | — | — | — | — | (362.13, | (387.36, | (0.19,  | <0.001 | (80.89,  | (86.07,  | (-0.18, | 0.457  | (0.73,   | (0.88,   | (-0.39, | 0.841  |
|                     |   |   |   |   | 375.79)  | 396.27)  | 0.23)   |        | 87.81)   | 90.51)   | 0.39)   |        | 1.59)    | 1.41)    | 0.48)   |        |
| Ukraine             | — | — | — | — | 58.78)   | 61.85)   | 0.18)   | <0.001 | 35.56)   | 87.30)   | 2.78)   | 0.005  | 0.55)    | 1.46)    | 2.99)   | 0.005  |

|                    |   |   |   |   |          |          |         |        |         |         |         |        |        |        |         |        |
|--------------------|---|---|---|---|----------|----------|---------|--------|---------|---------|---------|--------|--------|--------|---------|--------|
|                    |   |   |   |   | (57.21,  | (59.88,  | (0.15,  |        | (34.38, | (85.25, | (0.84,  |        | (0.41, | (1.21, | (0.91,  |        |
|                    |   |   |   |   | 60.38)   | 63.88)   | 0.20)   |        | 36.77)  | 89.40)  | 4.74)   |        | 0.72)  | 1.76)  | 5.11)   |        |
|                    |   |   |   |   | 63.23    | 65.76    | 0.13    |        | 21.31   | 18.48   | -0.52   |        | 0.30   | 0.25   | -0.68   |        |
| United Arab        | — | — | — | — | (56.94,  | (61.68,  | (0.11,  | <0.001 | (17.79, | (16.50, | (-0.69, | <0.001 | (0.03, | (0.08, | (-0.95, | <0.001 |
| Emirates           |   |   |   |   | 70.22)   | 70.10)   | 0.15)   |        | 25.55)  | 20.70)  | -0.36)  |        | 1.64)  | 0.77)  | -0.40)  |        |
|                    |   |   |   |   | 181.14   | 195.24   | 0.26    |        | 42.91   | 48.47   | 0.49    |        | 0.57   | 0.66   | 0.51    |        |
| United Kingdom     | — | — | — | — | (178.57, | (192.64, | (0.24,  | <0.001 | (41.66, | (47.21, | (-0.04, | 0.069  | (0.43, | (0.53, | (-0.08, | 0.091  |
|                    |   |   |   |   | 183.74)  | 197.88)  | 0.28)   |        | 44.18)  | 49.75)  | 1.01)   |        | 0.73)  | 0.83)  | 1.11)   |        |
|                    |   |   |   |   | 343.59   | 397.14   | 0.50    |        | 102.66  | 84.81   | -0.68   |        | 1.41   | 1.05   | -1.05   |        |
| United Republic of | — | — | — | — | (338.22, | (393.33, | (0.48,  | <0.001 | (99.61, | (83.01, | (-0.92, | <0.001 | (1.07, | (0.86, | (-1.24, | <0.001 |
| Tanzania           |   |   |   |   | 349.03)  | 400.97)  | 0.53)   |        | 105.80) | 86.65)  | -0.43)  |        | 1.84)  | 1.28)  | -0.86)  |        |
|                    |   |   |   |   | 261.27   | 179.57   | -1.27   |        | 47.69   | 46.28   | -0.08   |        | 0.58   | 0.63   | 0.28    |        |
| United States of   | — | — | — | — | (259.87, | (178.46, | (-1.37, | <0.001 | (47.10, | (45.72, | (-0.47, | 0.677  | (0.52, | (0.57, | (-0.22, | 0.272  |
| America            |   |   |   |   | 262.67)  | 180.68)  | -1.17)  |        | 48.28)  | 46.84)  | 0.30)   |        | 0.65)  | 0.70)  | 0.79)   |        |
|                    |   |   |   |   | 155.74   | 165.57   | 0.22    |        | 101.06  | 63.09   | -1.67   |        | 1.57   | 0.93   | -1.74   |        |
| United States      | — | — | — | — | (104.68, | (105.79, | (0.19,  | <0.001 | (60.55, | (29.28, | (-2.82, | 0.005  | (0.00, | (0.00, | (-2.31, | <0.001 |
| Virgin Islands     |   |   |   |   | 223.87)  | 247.66)  | 0.25)   |        | 159.13) | 119.84) | -0.51)  |        | 24.72) | 29.47) | -1.18)  |        |
|                    |   |   |   |   | 143.14   | 181.49   | 0.82    |        | 39.80   | 29.90   | -0.88   |        | 0.54   | 0.34   | -1.49   |        |
| Uruguay            | — | — | — | — | (133.52, | (170.80, | (0.80,  | <0.001 | (34.75, | (25.67, | (-1.65, | 0.026  | (0.11, | (0.04, | (-2.44, | 0.002  |
|                    |   |   |   |   | 153.27)  | 192.68)  | 0.84)   |        | 45.38)  | 34.62)  | -0.10)  |        | 1.59)  | 1.23)  | -0.53)  |        |
|                    |   |   |   |   | 96.74    | 116.05   | 0.63    |        | 46.47   | 53.45   | 0.46    |        | 0.69   | 0.79   | 0.56    |        |
| Uzbekistan         | — | — | — | — | (93.89,  | (113.55, | (0.61,  | <0.001 | (44.40, | (51.76, | (-0.05, | 0.076  | (0.46, | (0.60, | (0.05,  | 0.030  |
|                    |   |   |   |   | 99.67)   | 118.60)  | 0.64)   |        | 48.61)  | 55.17)  | 0.97)   |        | 1.01)  | 1.03)  | 1.06)   |        |
|                    |   |   |   |   | 120.69   | 125.42   | 0.13    |        | 94.12   | 112.20  | 0.60    |        | 1.50   | 1.78   | 0.55    |        |
| Vanuatu            | — | — | — | — | (84.82,  | (98.65,  | (0.12,  | <0.001 | (61.19, | (86.10, | (0.37,  | <0.001 | (0.00, | (0.04, | (0.33,  | <0.001 |
|                    |   |   |   |   | 167.91)  | 157.70)  | 0.14)   |        | 139.20) | 144.05) | 0.83)   |        | 18.36) | 10.75) | 0.78)   |        |
| Venezuela          |   |   |   |   | 66.55    | 87.45    | 0.93    |        | 26.32   | 20.33   | -0.81   |        | 0.38   | 0.26   | -1.25   |        |
| (Bolivarian        | — | — | — | — | (64.12,  | (84.90,  | (0.89,  | <0.001 | (24.72, | (19.12, | (-1.33, | 0.003  | (0.21, | (0.14, | (-1.92, | <0.001 |
| Republic of)       |   |   |   |   | 69.06)   | 90.07)   | 0.97)   |        | 28.00)  | 21.59)  | -0.28)  |        | 0.64)  | 0.45)  | -0.57)  |        |
|                    |   |   |   |   | 183.81   | 220.02   | 0.62    |        | 52.63   | 45.12   | -0.54   |        | 0.72   | 0.55   | -0.94   |        |
| Viet Nam           | — | — | — | — | (181.57, | (217.92, | (0.61,  | <0.001 | (51.38, | (44.19, | (-0.62, | <0.001 | (0.58, | (0.46, | (-1.09, | <0.001 |
|                    |   |   |   |   | 186.08)  | 222.14)  | 0.63)   |        | 53.89)  | 46.07)  | -0.45)  |        | 0.89)  | 0.67)  | -0.78)  |        |
| Yemen              | — | — | — | — | 309.48   | 338.90   | 0.31    | <0.001 | 76.01   | 90.14   | 0.63    | <0.001 | 1.03   | 1.22   | 0.65    | 0.001  |

|          |   |   |   |   |          |          |         |        |          |          |        |        |        |        |        |        |
|----------|---|---|---|---|----------|----------|---------|--------|----------|----------|--------|--------|--------|--------|--------|--------|
|          |   |   |   |   | (302.28, | (334.46, | (0.30,  |        | (72.28,  | (87.81,  | (0.34, |        | (0.63, | (0.96, | (0.26, |        |
|          |   |   |   |   | 316.83)  | 343.38)  | 0.33)   |        | 79.90)   | 92.52)   | 0.93)  |        | 1.59)  | 1.53)  | 1.04)  |        |
|          |   |   |   |   | 275.20   | 314.31   | 0.46    |        | 65.71    | 78.24    | 0.60   |        | 0.85   | 1.03   | 0.67   |        |
| Zambia   | — | — | — | — | (266.68, | (308.64, | (0.43,  | <0.001 | (61.36,  | (75.33,  | (0.46, | <0.001 | (0.41, | (0.71, | (0.44, | <0.001 |
|          |   |   |   |   | 283.97)  | 320.07)  | 0.49)   |        | 70.31)   | 81.25)   | 0.74)  |        | 1.60)  | 1.44)  | 0.90)  |        |
|          |   |   |   |   | 521.39   | 516.40   | -0.04   |        | 118.41   | 170.74   | 1.32   |        | 1.55   | 2.45   | 1.67   |        |
| Zimbabwe | — | — | — | — | (511.15, | (508.27, | (-0.06, | <0.001 | (113.20, | (165.87, | (0.94, | <0.001 | (0.99, | (1.89, | (1.21, | <0.001 |
|          |   |   |   |   | 531.82)  | 524.63)  | -0.02)  |        | 123.82)  | 175.71)  | 1.70)  |        | 2.33)  | 3.12)  | 2.14)  |        |

CI, confidence interval

“—” indicates that data are unavailable; \* significantly different from zero ( $P < 0.05$ ).

**Table S4 Age-standardized rate and proportion of disability-adjusted life years of overall cardiovascular disease attributed to 20 risk factors by sex, in 1990 and 2019.**

|                                         | Overall                   |                   |                            |                   | Women                     |                   |                            |                   | Men                       |                   |                            |           |
|-----------------------------------------|---------------------------|-------------------|----------------------------|-------------------|---------------------------|-------------------|----------------------------|-------------------|---------------------------|-------------------|----------------------------|-----------|
|                                         | 1990                      |                   | 2019                       |                   | 1990                      |                   | 2019                       |                   | 1990                      |                   | 2019                       |           |
|                                         | Age-standardized          |                   | Age-standardized           |                   | Age-standardized          |                   | Age-standardized           |                   | Age-standardized          |                   | Age-standardized           |           |
|                                         | disability-adjusted       | Proportio         | disability-adjusted        | Proportio         | disability-adjusted       | Proportio         | disability-adjusted        | Proportio         | disability-adjusted       | Proportio         | disability-adjusted        | Proportio |
|                                         | life years (95% CI)       | n (%)             | life years (95% CI)        | n (%)             | life years (95% CI)       | n (%)             | life years (95% CI)        | n (%)             | life years (95% CI)       | n (%)             | life years (95% CI)        | n (%)     |
| per 100,000 years                       |                           | per 100,000 years |                            | per 100,000 years |                           | per 100,000 years |                            | per 100,000 years |                           | per 100,000 years |                            |           |
| <b>Cardiovascular diseases</b>          |                           |                   |                            |                   |                           |                   |                            |                   |                           |                   |                            |           |
| Ambient particulate matter pollution    | 125.42<br>(125.26,125.57) | 9.97              | 170.73 (170.58,<br>170.87) | 17.23             | 83.58 (83.40,83.76)       | 7.79              | 104.08 (103.92,<br>104.24) | 13.92             | 166.16<br>(165.91,166.41) | 11.57             | 236.38 (236.14,<br>236.63) | 19.23     |
| Diet high in red meat                   | 68.61 (68.49,68.72)       | 5.46              | 53.95 (53.87, 54.03)       | 5.45              | 53.09 (52.95,53.23)       | 4.95              | 36.25 (36.16, 36.35)       | 4.85              | 83.72 (83.54,83.89)       | 5.83              | 71.38 (71.25, 71.52)       | 5.81      |
| Diet high in sodium                     | 91.50 (91.37,91.64)       | 7.28              | 60.44 (60.35, 60.52)       | 6.10              | 62.50 (62.35,62.66)       | 5.82              | 30.78 (30.69, 30.86)       | 4.12              | 119.73<br>(119.52,119.95) | 8.33              | 89.66 (89.51, 89.81)       | 7.29      |
| Diet high in trans fatty acids          | 54.56 (54.46,54.66)       | 4.34              | 43.37 (43.30, 43.44)       | 4.38              | 35.40 (35.28,35.52)       | 3.30              | 24.80 (24.72, 24.88)       | 3.32              | 73.21 (73.04,73.37)       | 5.10              | 61.66 (61.53, 61.78)       | 5.02      |
| Diet low in fiber                       | 90.14 (90.01,90.27)       | 7.17              | 57.94 (57.86, 58.03)       | 5.85              | 71.26 (71.10,71.43)       | 6.64              | 39.31 (39.21, 39.41)       | 5.26              | 108.52<br>(108.32,108.72) | 7.55              | 76.30 (76.17, 76.44)       | 6.21      |
| Diet low in fruits                      | 115.08<br>(114.94,115.23) | 9.15              | 80.31 (80.21, 80.41)       | 8.11              | 93.02 (92.83,93.21)       | 8.67              | 56.03 (55.91, 56.15)       | 7.49              | 136.56<br>(136.33,136.79) | 9.51              | 104.23 (104.07,<br>104.39) | 8.48      |
| Diet low in legumes                     | 95.26 (95.12,95.39)       | 7.58              | 74.10 (74.00, 74.19)       | 7.48              | 59.18 (59.03,59.33)       | 5.51              | 40.26 (40.16, 40.37)       | 5.38              | 130.37<br>(130.14,130.59) | 9.07              | 107.42 (107.26,<br>107.59) | 8.74      |
| Diet low in nuts and seeds              | 58.91 (58.81,59.02)       | 4.68              | 44.74 (44.67, 44.82)       | 4.52              | 36.87 (36.76,36.99)       | 3.43              | 25.18 (25.10, 25.26)       | 3.37              | 80.36 (80.19,80.54)       | 5.59              | 64.01 (63.88, 64.13)       | 5.21      |
| Diet low in polyunsaturated fatty acids | 34.07 (33.99,34.15)       | 2.71              | 27.99 (27.93, 28.05)       | 2.83              | 22.59 (22.50,22.69)       | 2.10              | 15.89 (15.82, 15.95)       | 2.13              | 45.25 (45.12,45.38)       | 3.15              | 39.91 (39.81, 40.01)       | 3.25      |
| Diet low in vegetables                  | 66.43 (66.32,66.55)       | 5.28              | 48.23 (48.15, 48.31)       | 4.87              | 52.72 (52.58,52.87)       | 4.91              | 33.36 (33.27, 33.45)       | 4.46              | 79.78 (79.61,79.96)       | 5.55              | 62.87 (62.75, 63.00)       | 5.11      |
| Diet low in whole grains                | 123.20<br>(123.05,123.35) | 9.80              | 106.62 (106.50,<br>106.73) | 10.76             | 80.01 (79.84,80.19)       | 7.45              | 61.79 (61.66, 61.91)       | 8.26              | 165.23<br>(164.98,165.48) | 11.50             | 150.78 (150.58,<br>150.97) | 12.26     |
| High body-mass index                    | 225.62<br>(225.41,225.82) | 17.94             | 300.35 (300.16,<br>300.55) | 30.32             | 197.27<br>(196.99,197.54) | 18.38             | 224.28 (224.04,<br>224.52) | 30.00             | 253.21<br>(252.91,253.52) | 17.62             | 375.22 (374.91,<br>375.53) | 30.52     |
| High fasting plasma glucose             | 66.28 (66.17,66.39)       | 5.27              | 67.19 (67.09, 67.28)       | 6.78              | 45.68 (45.55,45.81)       | 4.26              | 42.52 (42.42, 42.63)       | 5.69              | 86.33 (86.15,86.51)       | 6.01              | 91.48 (91.33, 91.63)       | 7.44      |
| High LDL cholesterol                    | 319.82<br>(319.57,320.07) | 25.43             | 279.48 (279.29,<br>279.66) | 28.21             | 219.08<br>(218.79,219.37) | 20.41             | 170.59 (170.38,<br>170.80) | 22.82             | 417.84<br>(417.44,418.24) | 29.08             | 386.74 (386.43,<br>387.06) | 31.45     |
| High systolic blood pressure            | 436.14                    | 34.68             | 390.16 (389.93,            | 39.38             | 317.02                    | 29.53             | 238.60 (238.36,            | 31.91             | 552.20                    | 38.44             | 539.48 (539.11,            | 43.88     |

|                                    |                     |       |                      |       |                     |       |                      |      |                     |       |                      |       |
|------------------------------------|---------------------|-------|----------------------|-------|---------------------|-------|----------------------|------|---------------------|-------|----------------------|-------|
|                                    | (435.85,436.43)     |       | 390.38)              |       | (316.67,317.37)     |       | 238.85)              |      | (551.74,552.65)     |       | 539.85)              |       |
| Household air pollution from solid | 221.13              |       |                      |       | 195.66              |       |                      |      | 245.91              |       | 106.14 (105.98,      |       |
| fuels                              | (220.93,221.34)     | 17.58 | 90.29 (90.18, 90.40) | 9.11  | (195.39,195.94)     | 18.23 | 74.20 (74.06, 74.33) | 9.92 | (245.61,246.22)     | 17.12 | 106.31)              | 8.63  |
| Kidney dysfunction                 | 54.59 (54.49,54.70) | 4.34  | 49.67 (49.59, 49.75) | 5.01  | 44.91 (44.78,45.04) | 4.18  | 34.70 (34.61, 34.79) | 4.64 | 64.01 (63.85,64.16) | 4.46  | 64.41 (64.29, 64.54) | 5.24  |
| Low temperature                    | 51.23 (51.13,51.32) | 4.07  | 33.24 (33.17, 33.30) | 3.36  | 38.03 (37.91,38.15) | 3.54  | 20.51 (20.44, 20.59) | 2.74 | 64.09 (63.93,64.24) | 4.46  | 45.75 (45.64, 45.85) | 3.72  |
| Secondhand smoke                   | 63.71 (63.60,63.82) | 5.07  | 45.29 (45.21, 45.36) | 4.57  | 72.06 (71.90,72.23) | 6.71  | 44.22 (44.11, 44.33) | 5.91 | 55.56 (55.42,55.70) | 3.87  | 46.34 (46.23, 46.45) | 3.77  |
| Smoking                            | 182.48              |       | 124.46 (124.34,      |       |                     |       |                      |      | 304.29              |       | 219.23 (218.99,      |       |
|                                    | (182.29,182.67)     | 14.51 | 124.59)              | 12.56 | 57.07 (56.92,57.22) | 5.32  | 28.24 (28.15, 28.32) | 3.78 | (303.95,304.63)     | 21.18 | 219.46)              | 17.83 |

CI, confidence interval

**Table S5 Age-standardized rate and proportion of disability-adjusted life years of overall cardiovascular disease attributed to 20 risk factors in 2019 by sociodemographic index.**

|                                          | High sociodemographic index                               |                | High-middle sociodemographic index                        |                | Middle sociodemographic index                             |                | Low-middle sociodemographic index                         |                | Low sociodemographic index                                |                |
|------------------------------------------|-----------------------------------------------------------|----------------|-----------------------------------------------------------|----------------|-----------------------------------------------------------|----------------|-----------------------------------------------------------|----------------|-----------------------------------------------------------|----------------|
|                                          | Age-standardized rate                                     |                | Age-standardized rate                                     |                | Age-standardized rate                                     |                | Age-standardized rate                                     |                | Age-standardized rate                                     |                |
|                                          | disability-adjusted life years (95% CI) per 100,000 years | Proportion (%) | disability-adjusted life years (95% CI) per 100,000 years | Proportion (%) | disability-adjusted life years (95% CI) per 100,000 years | Proportion (%) | disability-adjusted life years (95% CI) per 100,000 years | Proportion (%) | disability-adjusted life years (95% CI) per 100,000 years | Proportion (%) |
| <b>Cardiovascular diseases</b>           |                                                           |                |                                                           |                |                                                           |                |                                                           |                |                                                           |                |
| Ambient particulate matter pollution     | 59.89 (59.64, 60.13)                                      | 13.59          | 155.12 (154.81, 155.44)                                   | 18.68          | 224.28 (223.99, 224.58)                                   | 22.47          | 205.66 (205.33, 206.00)                                   | 16.15          | 102.07 (101.74, 102.40)                                   | 8.81           |
| Diet high in red meat                    | 43.65 (43.44, 43.86)                                      | 9.91           | 75.84 (75.62, 76.05)                                      | 9.13           | 63.05 (62.89, 63.20)                                      | 6.32           | 37.44 (37.30, 37.59)                                      | 2.94           | 34.49 (34.30, 34.68)                                      | 2.98           |
| Diet high in sodium                      | 21.04 (20.90, 21.19)                                      | 4.77           | 71.49 (71.27, 71.70)                                      | 8.61           | 72.23 (72.06, 72.40)                                      | 7.24           | 66.94 (66.74, 67.13)                                      | 5.26           | 38.94 (38.74, 39.15)                                      | 3.36           |
| Diet high in trans fatty acids           | 19.15 (19.02, 19.29)                                      | 4.35           | 27.55 (27.42, 27.68)                                      | 3.32           | 46.15 (46.01, 46.28)                                      | 4.62           | 68.27 (68.08, 68.47)                                      | 5.36           | 40.84 (40.63, 41.05)                                      | 3.52           |
| Diet low in fiber                        | 21.13 (20.99, 21.28)                                      | 4.80           | 37.28 (37.13, 37.43)                                      | 4.49           | 61.84 (61.69, 62.00)                                      | 6.20           | 89.77 (89.55, 90.00)                                      | 7.05           | 60.06 (59.81, 60.31)                                      | 5.18           |
| Diet low in fruits                       | 29.26 (29.09, 29.43)                                      | 6.64           | 58.40 (58.21, 58.59)                                      | 7.03           | 77.41 (77.23, 77.58)                                      | 7.76           | 122.48 (122.22, 122.74)                                   | 9.62           | 98.05 (97.73, 98.37)                                      | 8.46           |
| Diet low in legumes                      | 29.87 (29.70, 30.04)                                      | 6.78           | 59.66 (59.47, 59.85)                                      | 7.18           | 77.75 (77.57, 77.92)                                      | 7.79           | 104.54 (104.30, 104.78)                                   | 8.21           | 77.03 (76.75, 77.32)                                      | 6.65           |
| Diet low in nuts and seeds               | 10.01 (9.91, 10.11)                                       | 2.27           | 31.97 (31.83, 32.11)                                      | 3.85           | 41.29 (41.17, 41.42)                                      | 4.14           | 78.94 (78.73, 79.15)                                      | 6.20           | 47.43 (47.21, 47.66)                                      | 4.09           |
| Diet low in polyunsaturated fatty acids  | 5.11 (5.04, 5.18)                                         | 1.16           | 19.95 (19.84, 20.06)                                      | 2.40           | 30.15 (30.04, 30.26)                                      | 3.02           | 42.34 (42.19, 42.49)                                      | 3.32           | 32.48 (32.30, 32.67)                                      | 2.80           |
| Diet low in vegetables                   | 14.66 (14.54, 14.79)                                      | 3.33           | 19.70 (19.59, 19.82)                                      | 2.37           | 40.04 (39.91, 40.16)                                      | 4.01           | 82.67 (82.46, 82.89)                                      | 6.49           | 87.49 (87.18, 87.79)                                      | 7.55           |
| Diet low in whole grains                 | 45.50 (45.29, 45.72)                                      | 10.33          | 94.29 (94.05, 94.54)                                      | 11.35          | 112.48 (112.27, 112.69)                                   | 11.27          | 137.58 (137.31, 137.86)                                   | 10.80          | 116.43 (116.08, 116.78)                                   | 10.05          |
| High body-mass index                     | 185.75 (185.31, 186.19)                                   | 42.15          | 279.86 (279.43, 280.29)                                   | 33.70          | 358.96 (358.59, 359.34)                                   | 35.97          | 328.92 (328.50, 329.35)                                   | 25.83          | 242.34 (241.85, 242.84)                                   | 20.91          |
| High fasting plasma glucose              | 34.71 (34.53, 34.90)                                      | 7.88           | 66.23 (66.02, 66.43)                                      | 7.97           | 67.35 (67.19, 67.51)                                      | 6.75           | 88.24 (88.02, 88.46)                                      | 6.93           | 62.38 (62.13, 62.64)                                      | 5.38           |
| High LDL cholesterol                     | 125.85 (125.49, 126.20)                                   | 28.56          | 249.18 (248.78, 249.57)                                   | 30.00          | 310.69 (310.34, 311.03)                                   | 31.13          | 359.66 (359.21, 360.10)                                   | 28.24          | 254.78 (254.26, 255.30)                                   | 21.99          |
| High systolic blood pressure             | 161.82 (161.42, 162.23)                                   | 36.72          | 344.65 (344.19, 345.12)                                   | 41.50          | 396.57 (396.18, 396.96)                                   | 39.74          | 503.36 (502.83, 503.89)                                   | 39.53          | 465.24 (464.55, 465.94)                                   | 40.15          |
| Household air pollution from solid fuels | 0.34 (0.33, 0.36)                                         | 0.08           | 14.75 (14.65, 14.85)                                      | 1.78           | 52.84 (52.69, 52.98)                                      | 5.29           | 182.06 (181.75, 182.38)                                   | 14.30          | 235.46 (234.96, 235.95)                                   | 20.32          |
| Kidney dysfunction                       | 14.78 (14.66, 14.91)                                      | 3.35           | 41.88 (41.72, 42.04)                                      | 5.04           | 58.83 (58.68, 58.98)                                      | 5.89           | 65.57 (65.38, 65.77)                                      | 5.15           | 44.33 (44.11, 44.54)                                      | 3.83           |
| Low temperature                          | 19.15 (19.01, 19.29)                                      | 4.35           | 37.57 (37.41, 37.72)                                      | 4.52           | 36.66 (36.54, 36.78)                                      | 3.67           | 34.23 (34.10, 34.37)                                      | 2.69           | 29.30 (29.13, 29.47)                                      | 2.53           |
| Secondhand smoke                         | 17.94 (17.81, 18.08)                                      | 4.07           | 38.31 (38.15, 38.46)                                      | 4.61           | 50.77 (50.63, 50.91)                                      | 5.09           | 60.70 (60.52, 60.89)                                      | 4.77           | 41.02 (40.81, 41.22)                                      | 3.54           |
| Smoking                                  | 78.09 (77.81, 78.37)                                      | 17.72          | 153.58 (153.28, 153.89)                                   | 18.49          | 139.87 (139.64, 140.10)                                   | 14.01          | 125.11 (124.84, 125.37)                                   | 9.82           | 79.99 (79.69, 80.28)                                      | 6.90           |

CI, confidence interval

**Table S6 Age-specific rate and proportion of disability-adjusted life years of overall cardiovascular disease attributed to 20 risk factors in 2019 by age.**

|                                          | 15-19 years                                                                 |                | 20-24 years                                                                 |                | 25-29 years                                                                 |                | 30-34 years                                                                 |                | 35-39 years                                                                 |                |
|------------------------------------------|-----------------------------------------------------------------------------|----------------|-----------------------------------------------------------------------------|----------------|-----------------------------------------------------------------------------|----------------|-----------------------------------------------------------------------------|----------------|-----------------------------------------------------------------------------|----------------|
|                                          | Age-specific disability-adjusted life years rate (95% CI) per 100,000 years |                | Age-specific disability-adjusted life years rate (95% CI) per 100,000 years |                | Age-specific disability-adjusted life years rate (95% CI) per 100,000 years |                | Age-specific disability-adjusted life years rate (95% CI) per 100,000 years |                | Age-specific disability-adjusted life years rate (95% CI) per 100,000 years |                |
|                                          | Proportion (%)                                                              | Proportion (%) | Proportion (%)                                                              | Proportion (%) | Proportion (%)                                                              | Proportion (%) | Proportion (%)                                                              | Proportion (%) | Proportion (%)                                                              | Proportion (%) |
| <b>Cardiovascular diseases</b>           |                                                                             |                |                                                                             |                |                                                                             |                |                                                                             |                |                                                                             |                |
| Ambient particulate matter pollution     | —                                                                           | —              | —                                                                           | —              | 174.22 (139.63, 212.08)                                                     | 21.17          | 292.15 (232.21, 353.30)                                                     | 22.92          | 441.95 (350.62, 539.33)                                                     | 22.36          |
| Diet high in red meat                    | —                                                                           | —              | —                                                                           | —              | 51.75 (30.15, 73.62)                                                        | 6.29           | 90.78 (50.98, 128.73)                                                       | 7.12           | 145.01 (81.54, 205.46)                                                      | 7.34           |
| Diet high in sodium                      | —                                                                           | —              | —                                                                           | —              | 43.91 (8.14, 116.85)                                                        | 5.34           | 97.91 (23.78, 225.87)                                                       | 7.68           | 182.29 (50.58, 390.98)                                                      | 9.22           |
| Diet high in trans fatty acids           | —                                                                           | —              | —                                                                           | —              | 39.22 (3.58, 53.68)                                                         | 4.77           | 73.01 (6.74, 100.09)                                                        | 5.73           | 119.22 (10.95, 162.62)                                                      | 6.03           |
| Diet low in fiber                        | —                                                                           | —              | —                                                                           | —              | 58.22 (31.64, 85.17)                                                        | 7.07           | 98.46 (52.57, 144.87)                                                       | 7.73           | 151.76 (80.43, 228.72)                                                      | 7.68           |
| Diet low in fruits                       | —                                                                           | —              | —                                                                           | —              | 79.8 (52.11, 107.97)                                                        | 9.70           | 134.39 (86.92, 182.27)                                                      | 10.54          | 213.58 (136.74, 295.01)                                                     | 10.80          |
| Diet low in legumes                      | —                                                                           | —              | —                                                                           | —              | 67.02 (14.27, 108.47)                                                       | 8.14           | 125.03 (26.69, 201.42)                                                      | 9.81           | 203.34 (42.93, 326.20)                                                      | 10.29          |
| Diet low in nuts and seeds               | —                                                                           | —              | —                                                                           | —              | 42.26 (22.15, 58.82)                                                        | 5.13           | 77.34 (42.32, 109.33)                                                       | 6.07           | 118.78 (63.89, 162.32)                                                      | 6.01           |
| Diet low in polyunsaturated fatty acids  | —                                                                           | —              | —                                                                           | —              | 25.63 (2.58, 51.56)                                                         | 3.11           | 47.48 (5.06, 96.53)                                                         | 3.73           | 76.19 (8.00, 153.17)                                                        | 3.85           |
| Diet low in vegetables                   | —                                                                           | —              | —                                                                           | —              | 48.66 (30.15, 67.22)                                                        | 5.91           | 79.01 (48.31, 108.96)                                                       | 6.20           | 129.24 (78.67, 178.56)                                                      | 6.54           |
| Diet low in whole grains                 | —                                                                           | —              | —                                                                           | —              | 99.89 (44.95, 127.10)                                                       | 12.14          | 180.60 (78.40, 230.15)                                                      | 14.17          | 287.95 (122.72, 367.25)                                                     | 14.57          |
| High body-mass index                     | —                                                                           | —              | 153.18 (75.78, 252.97)                                                      | 24.04          | 263.74 (138.94, 405.47)                                                     | 32.04          | 460.00 (257.21, 666.65)                                                     | 36.09          | 706.59 (472.44, 958.9)                                                      | 35.75          |
| High fasting plasma glucose              | —                                                                           | —              | —                                                                           | —              | 67.27 (28.75, 121.95)                                                       | 8.17           | 115.63 (57.44, 197.72)                                                      | 9.07           | 174.66 (99.75, 269.07)                                                      | 8.84           |
| High LDL cholesterol                     | —                                                                           | —              | —                                                                           | —              | 255.58 (208.69, 306.65)                                                     | 31.05          | 468.20 (393.48, 539.04)                                                     | 36.74          | 767.46 (663.85, 881.90)                                                     | 38.82          |
| High systolic blood pressure             | 7.72 (5.65, 9.52)                                                           | 1.83           | 12.71 (9.38, 15.07)                                                         | 1.99           | 391.86 (290.95, 492.12)                                                     | 47.61          | 642.24 (499.13, 779.15)                                                     | 50.39          | 1020.24 (853.96, 1204.75)                                                   | 51.61          |
| Household air pollution from solid fuels | —                                                                           | —              | —                                                                           | —              | 99.74 (69.92, 133.45)                                                       | 12.12          | 150.95 (102.75, 203.86)                                                     | 11.84          | 229.03 (158.15, 311.37)                                                     | 11.59          |
| Kidney dysfunction                       | —                                                                           | —              | —                                                                           | —              | 40.07 (29.27, 53.94)                                                        | 4.87           | 81.93 (59.95, 109.93)                                                       | 6.43           | 143.76 (102.65, 197.76)                                                     | 7.27           |
| Low temperature                          | 9.32 (6.85, 11.93)                                                          | 2.21           | 17.3 (12.7, 22.3)                                                           | 2.72           | 24.99 (19.05, 31.48)                                                        | 3.04           | 46.54 (35.88, 57.79)                                                        | 3.65           | 75.80 (58.04, 93.33)                                                        | 3.83           |
| Secondhand smoke                         | —                                                                           | —              | —                                                                           | —              | 54.16 (32.87, 78.26)                                                        | 6.58           | 77.50 (45.44, 115.08)                                                       | 6.08           | 108.33 (62.10, 162.45)                                                      | 5.48           |

1000



|         |   |   |   |   |      |      |                            |       |                         |       |
|---------|---|---|---|---|------|------|----------------------------|-------|-------------------------|-------|
| Smoking | — | — | — | — | 0.00 | 0.00 | 229.50 (205.54,<br>255.72) | 18.01 | 446.73 (404.73, 495.19) | 22.60 |
|---------|---|---|---|---|------|------|----------------------------|-------|-------------------------|-------|

---

CI, confidence interval
